# Supplementary material for: Long-term patterns of gender imbalance in an industry without ability or level of interest differences
Source: PubMed Central journal article supplement (PMC7112163; doi:10.1371/journal.pone.0229662), 2020-04-01

# 1941-2010

## ACTING ALL

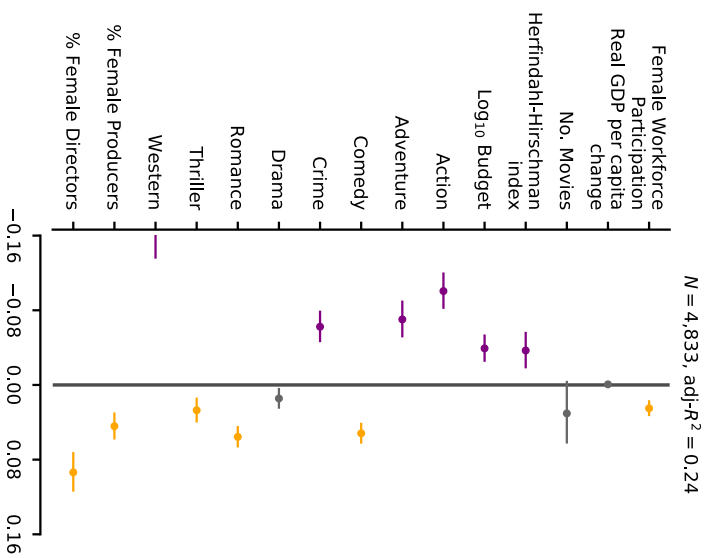

## ACTING CREDITED

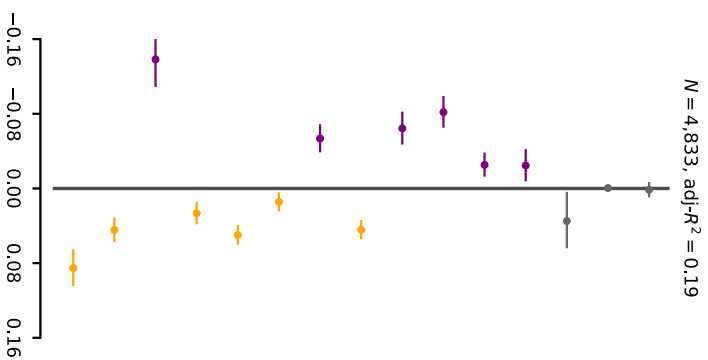

## WRITING

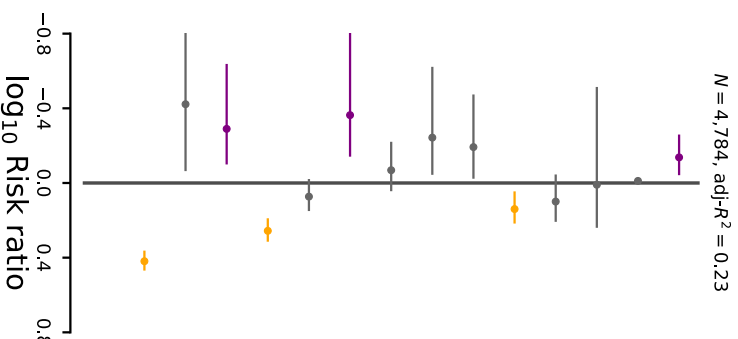

## DIRECTING

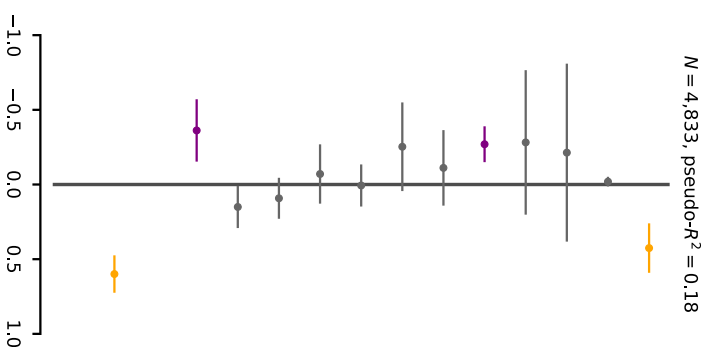

## CINEMATOGRAPHY

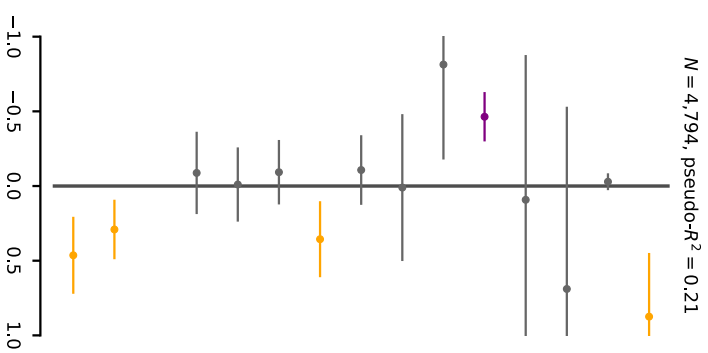

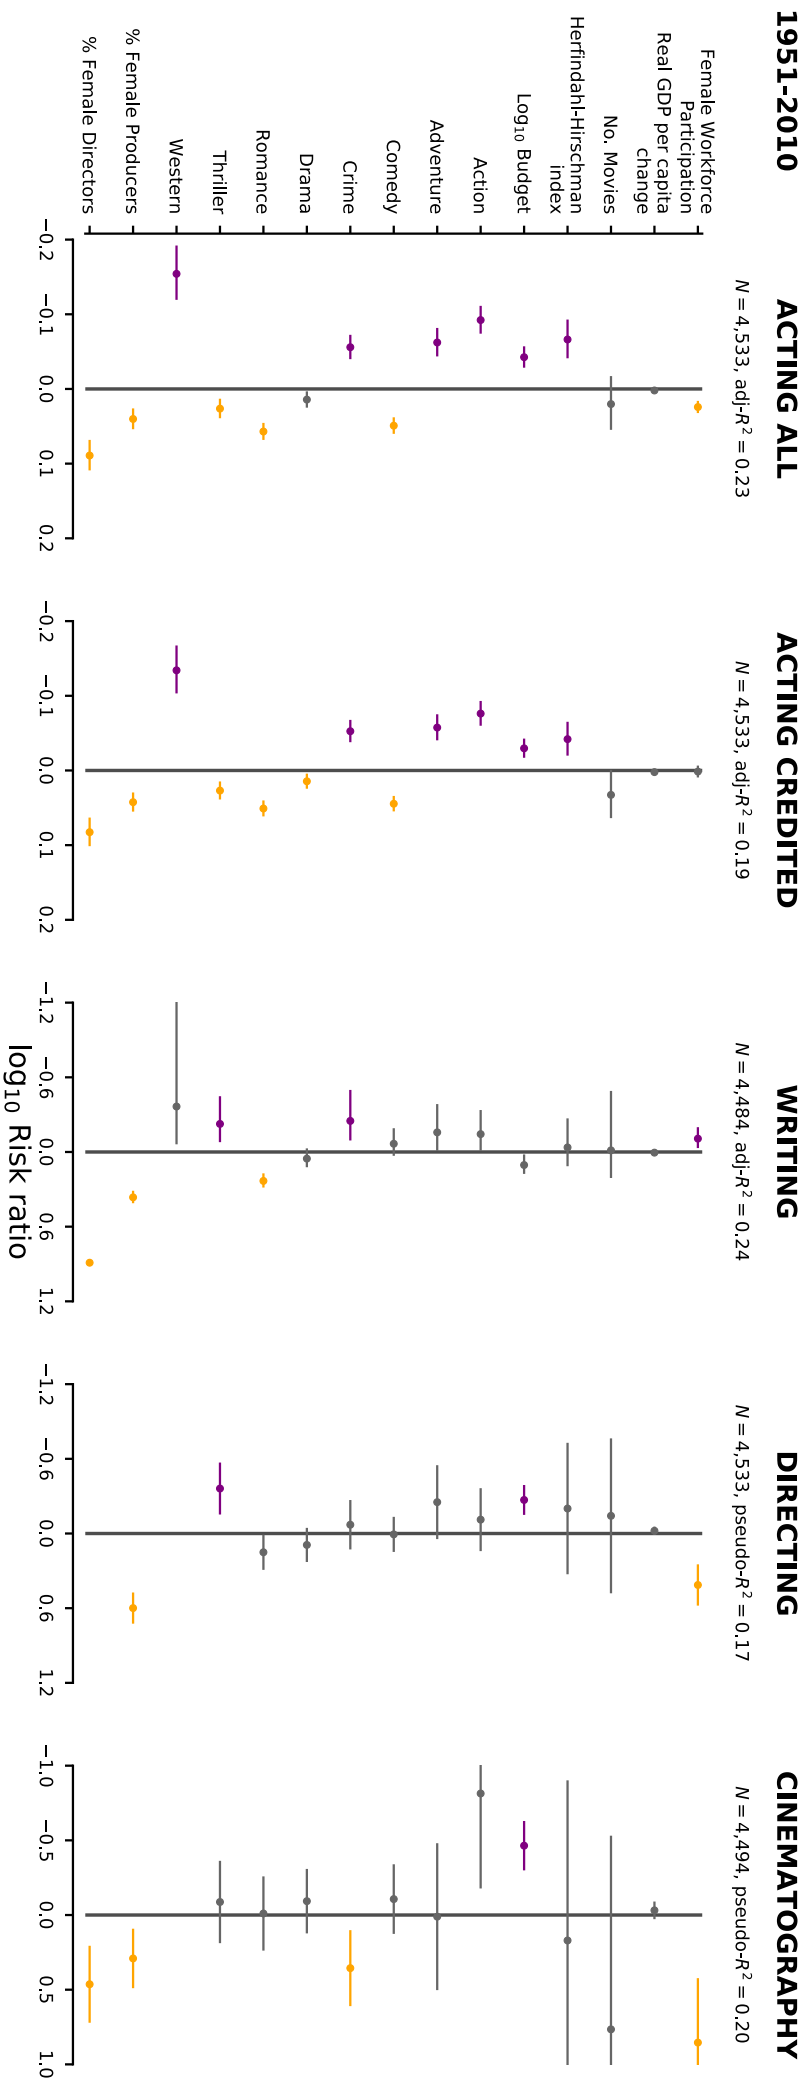

# 1961-2010

## ACTING ALL

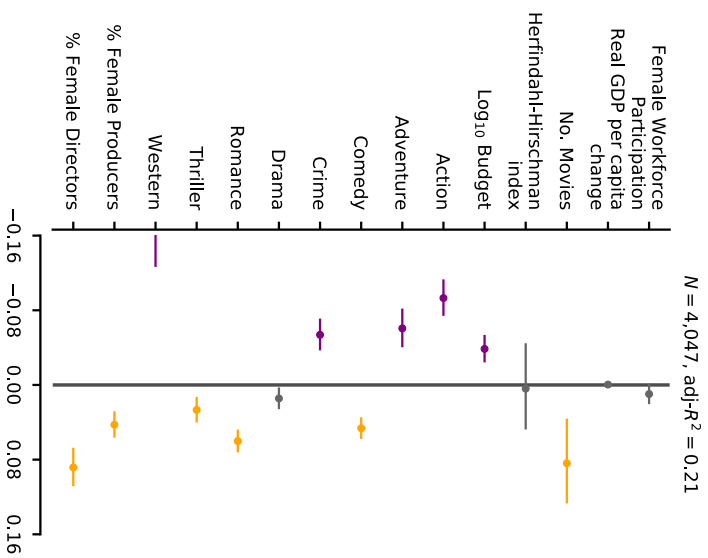

## ACTING CREDITED

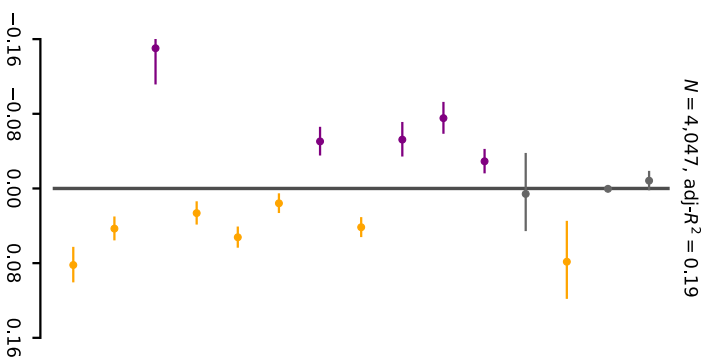

## WRITING

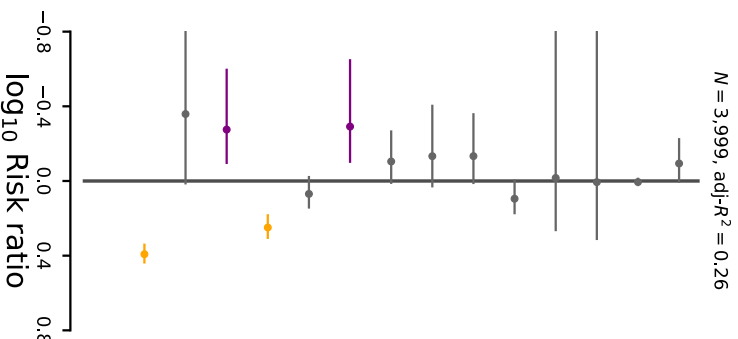

## DIRECTING

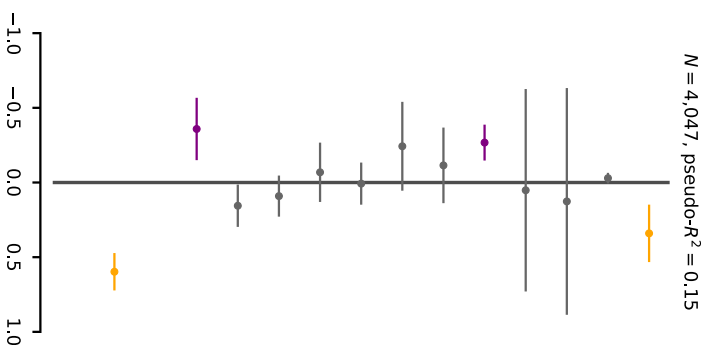

## CINEMATOGRAPHY

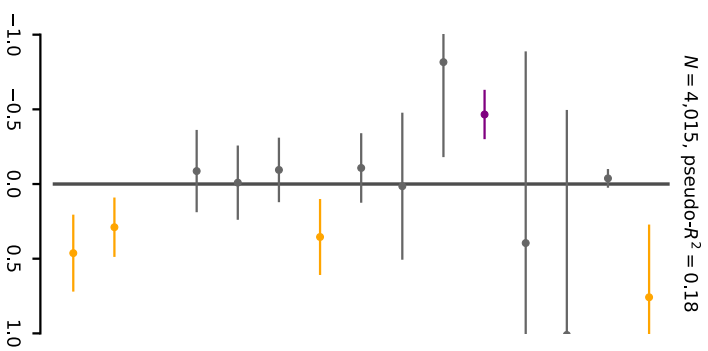

# 1971-2010

## ACTING ALL

N = 3,664, adj-R<sup>2</sup> = 0.21

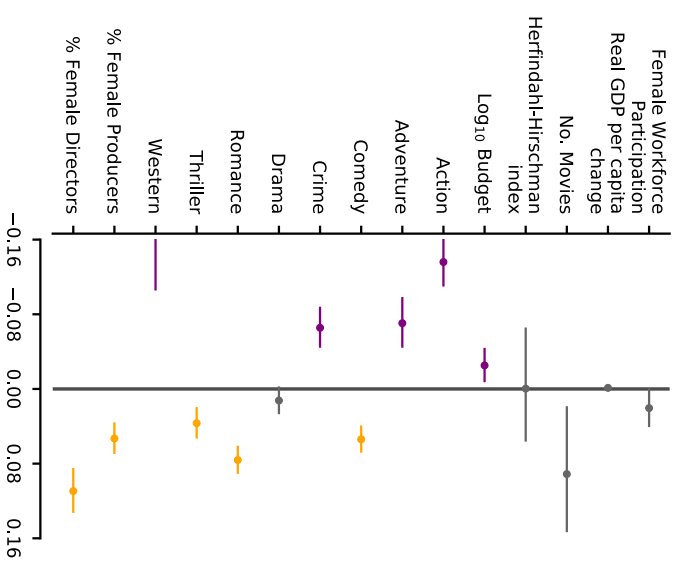

## ACTING CREDITED

N = 3,664, adj-R<sup>2</sup> = 0.19

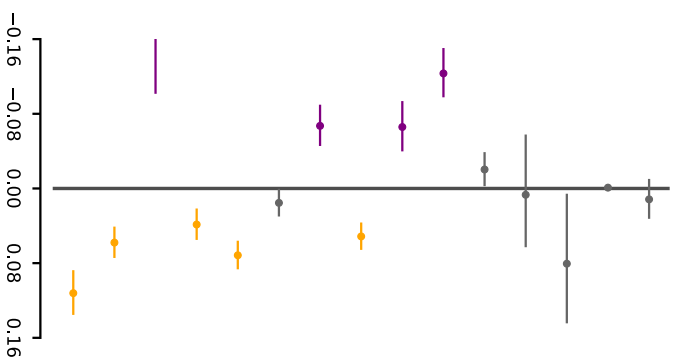

## WRITING

N = 3,620, adj-R<sup>2</sup> = 0.27

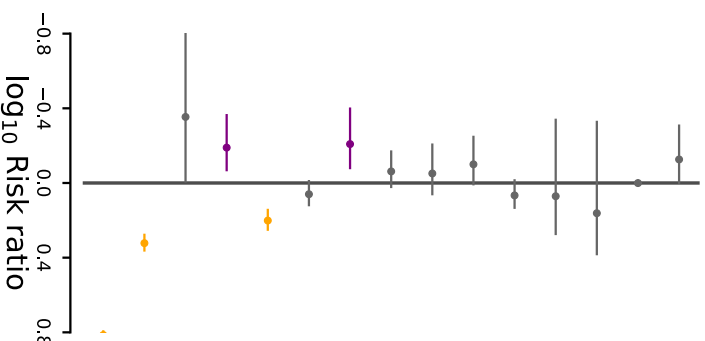

## DIRECTING

N = 3,664, pseudo-R<sup>2</sup> = 0.13

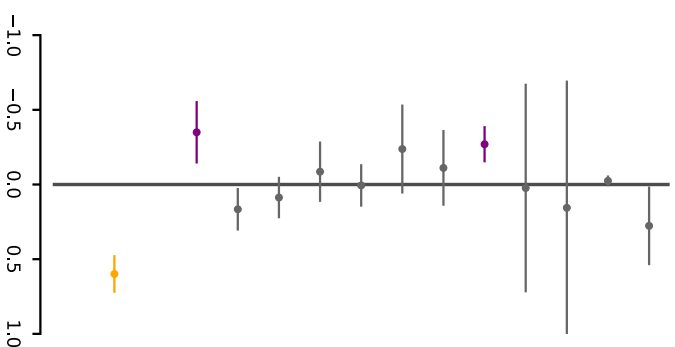

## CINEMATOGRAPHY

N = 3,638, pseudo-R<sup>2</sup> = 0.16

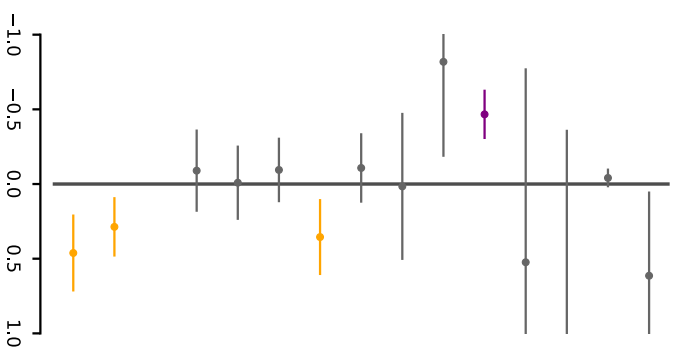

# 1956-2000

## ACTING ALL

N = 2,913, adj-R<sup>2</sup> = 0.22

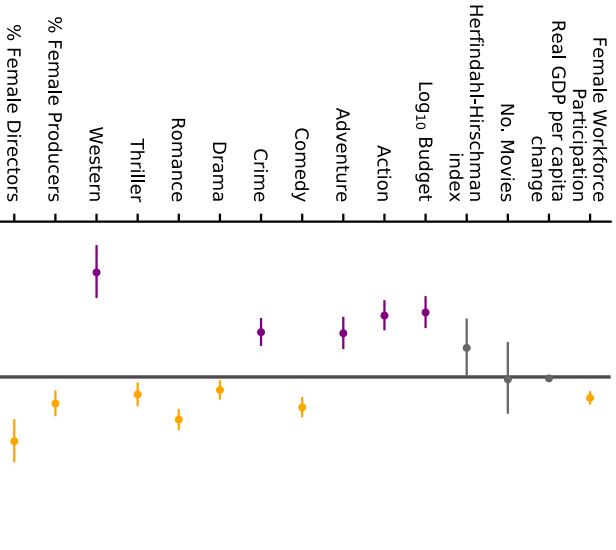

## ACTING CREDITED

N = 2,913, adj-R<sup>2</sup> = 0.19

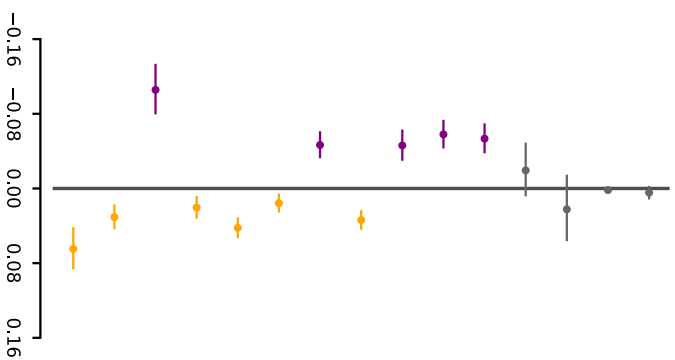

## WRITING

N = 2,898, adj-R<sup>2</sup> = 0.16

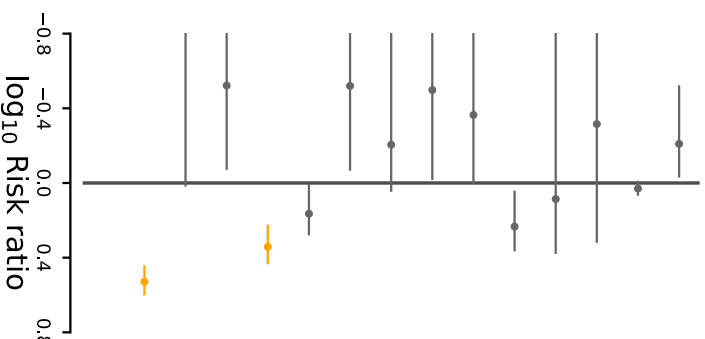

## DIRECTING

N = 2,913, pseudo-R<sup>2</sup> = 0.14

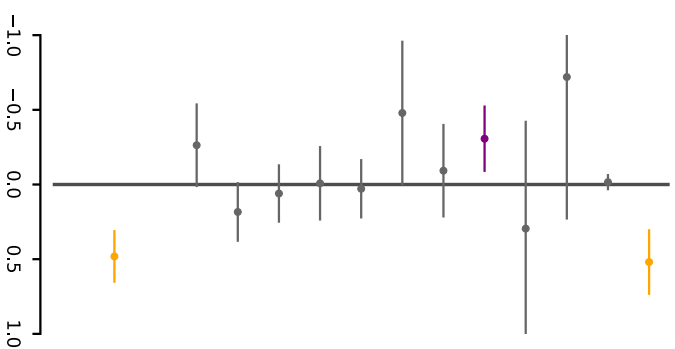

## CINEMATOGRAPHY

N = 2,896, pseudo-R<sup>2</sup> = 0.24

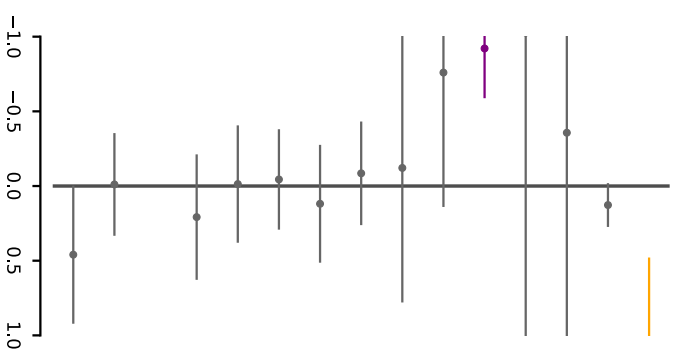

Supplement: pone.0229662.s003.pdf [file pone.0229662.s003.pdf]
