# Supplementary material for: Long-term patterns of gender imbalance in an industry without ability or level of interest differences
Source: PubMed Central journal article supplement (PMC7112163; doi:10.1371/journal.pone.0229662), 2020-04-01

# 1951-2010

## ACTING ALL

N = 4,533, adj-R<sup>2</sup> = 0.24

## ACTING CREDITED

N = 4,533, adj-R<sup>2</sup> = 0.19

## WRITING

N = 4,484, adj-R<sup>2</sup> = 0.24

## DIRECTING

N = 4,533, pseudo-R<sup>2</sup> = 0.18

## CINEMATOGRAPHY

N = 4,494, pseudo-R<sup>2</sup> = 0.22

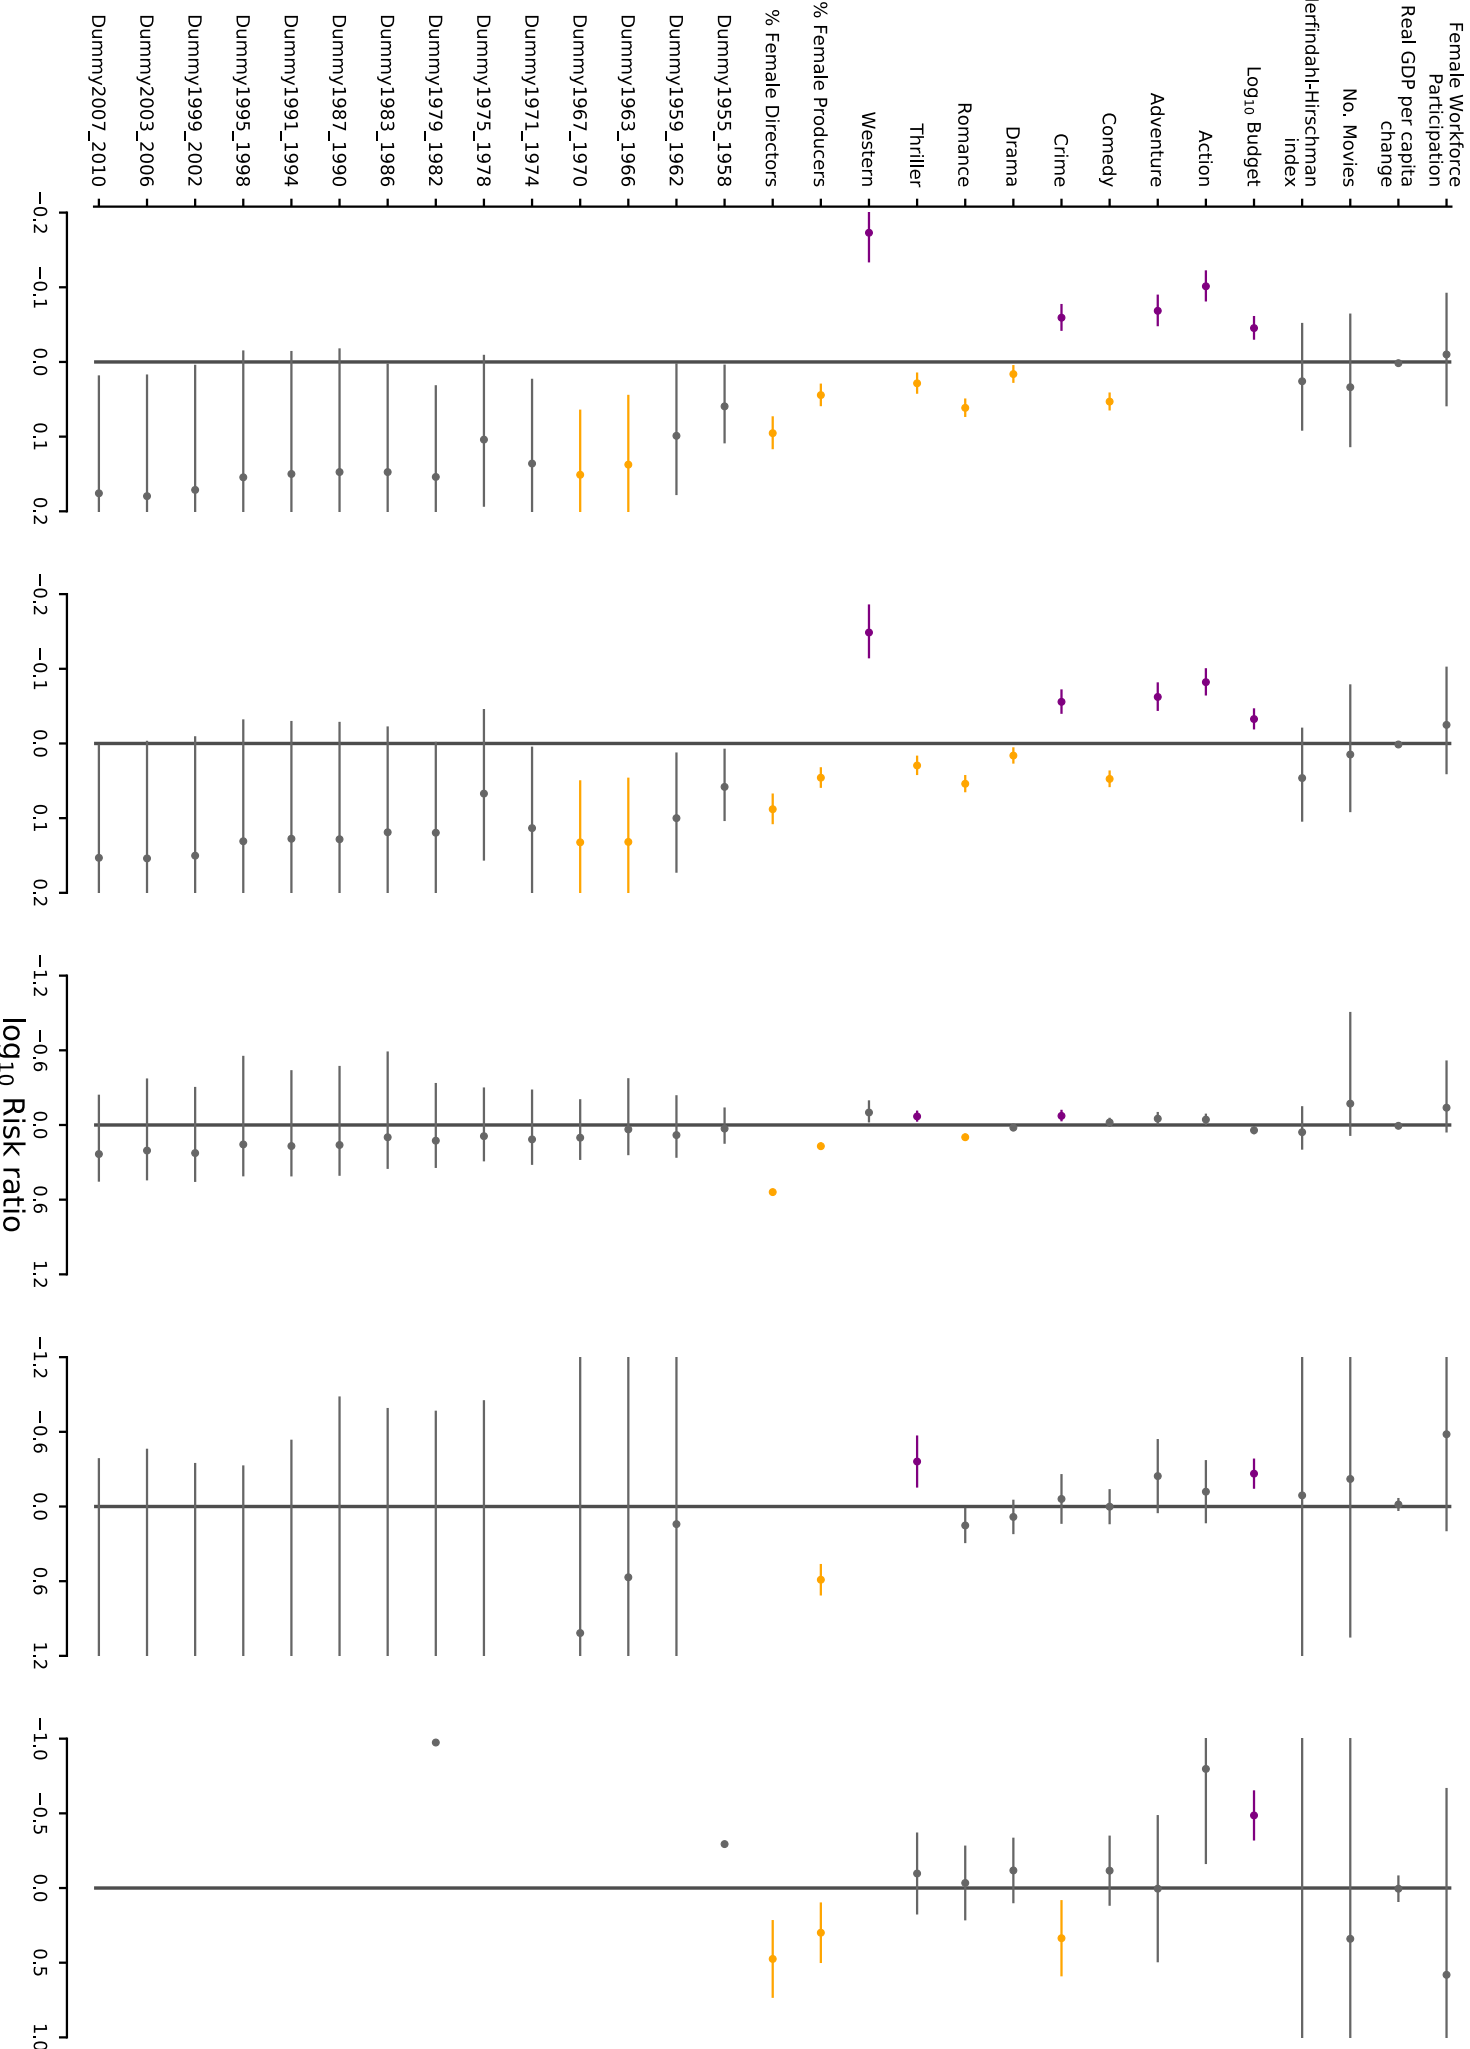

# 1963-2010

## ACTING ALL

N = 3,975, adj-R<sup>2</sup> = 0.21

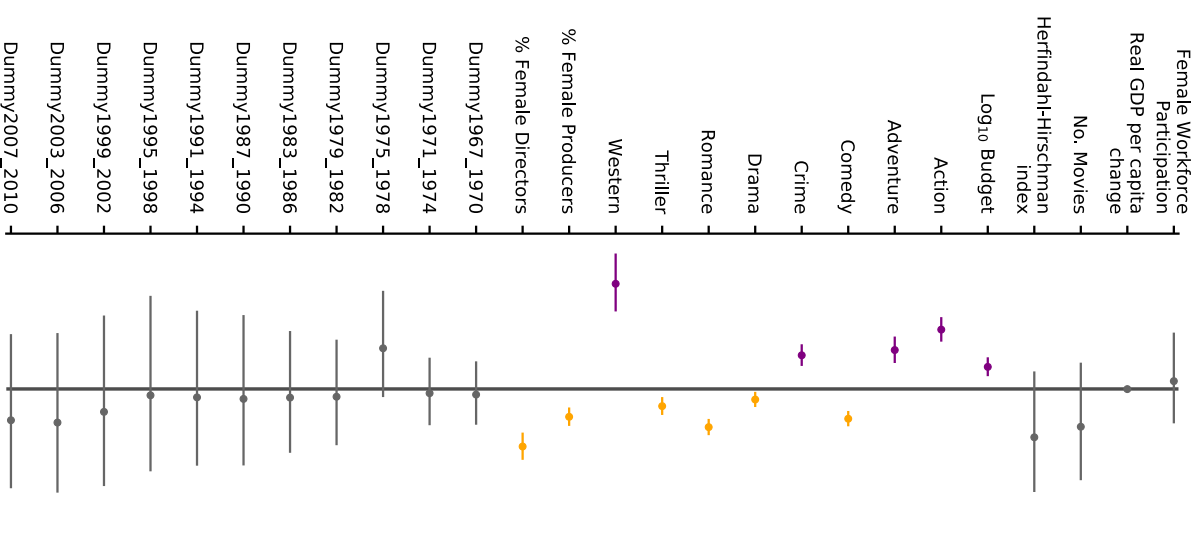

## ACTING CREDITED

N = 3,975, adj-R<sup>2</sup> = 0.19

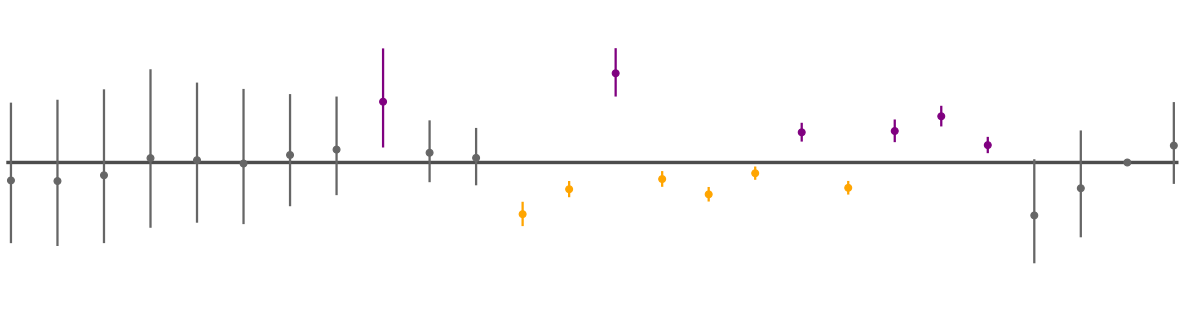

## WRITING

N = 3,927, adj-R<sup>2</sup> = 0.26

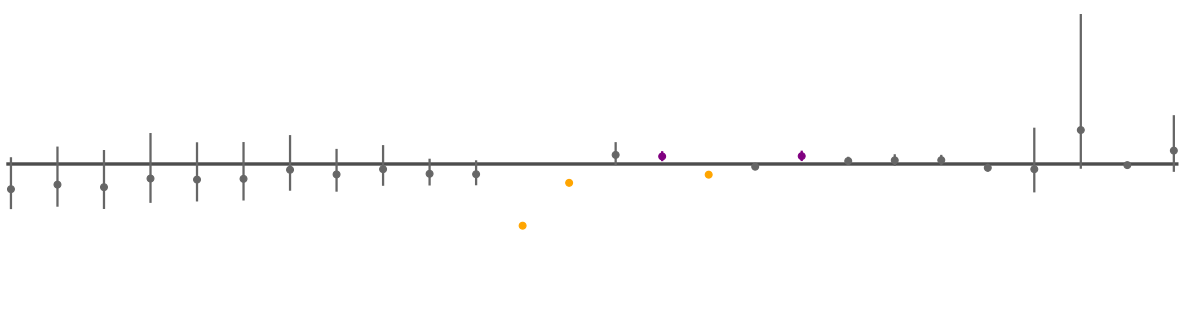

## DIRECTING

N = 3,975, pseudo-R<sup>2</sup> = 0.115

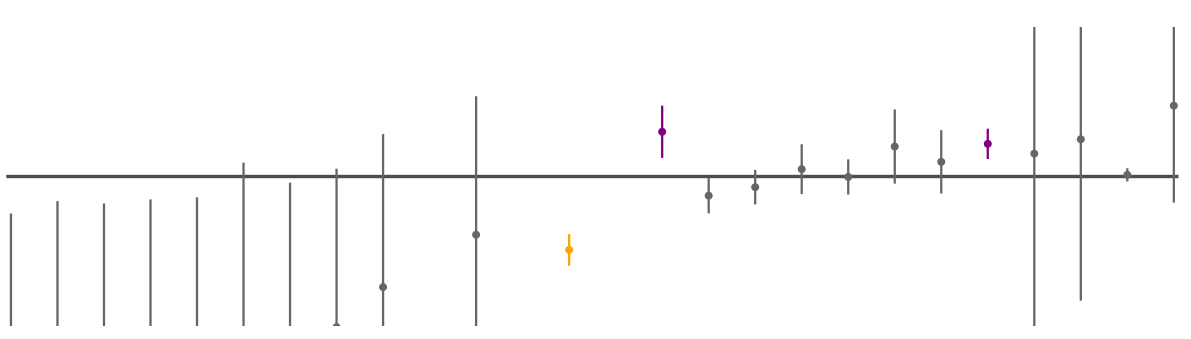

## CINEMATOGRAPHY

N = 3,944, pseudo-R<sup>2</sup> = 0.20

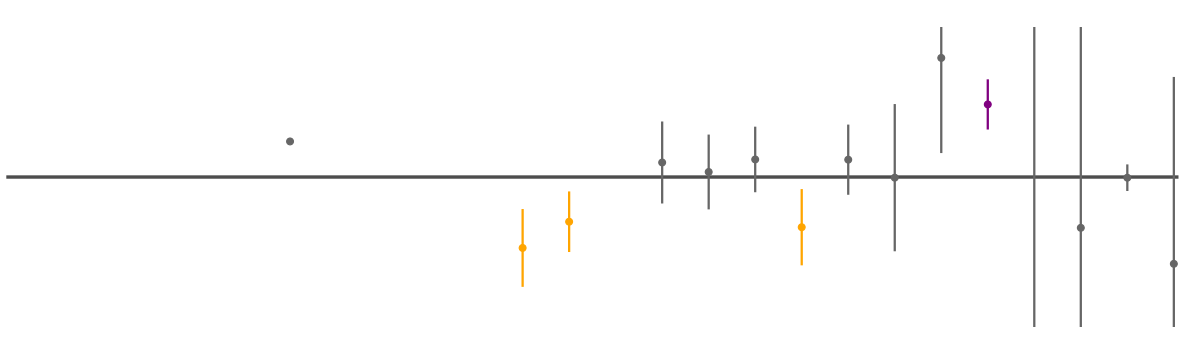

log<sub>10</sub> Risk ratio

# 1971-2010

## ACTING ALL

N = 3,664, adj-R<sup>2</sup> = 0.22

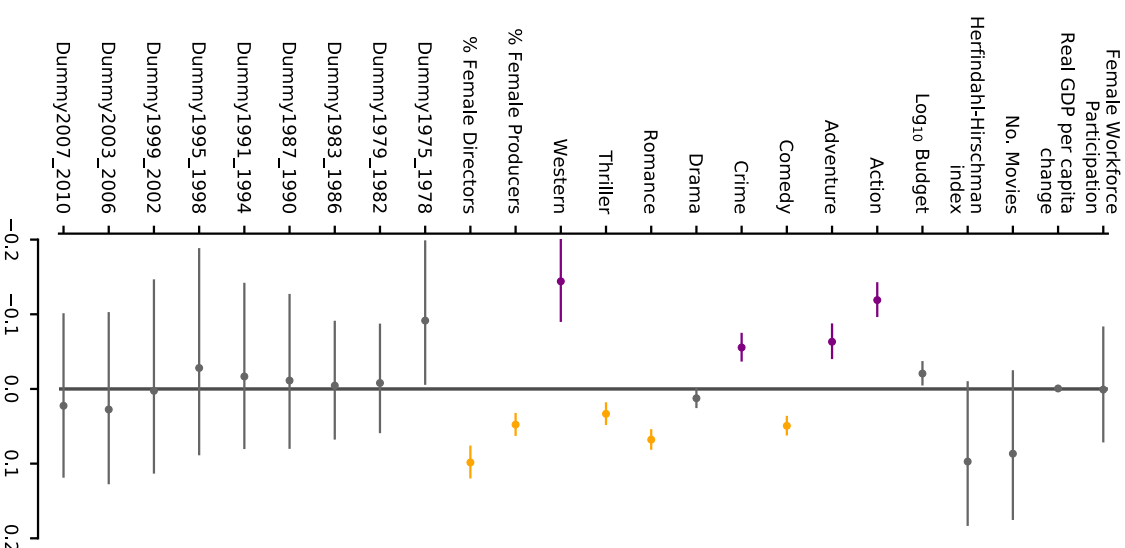

## ACTING CREDITED

N = 3,664, adj-R<sup>2</sup> = 0.20

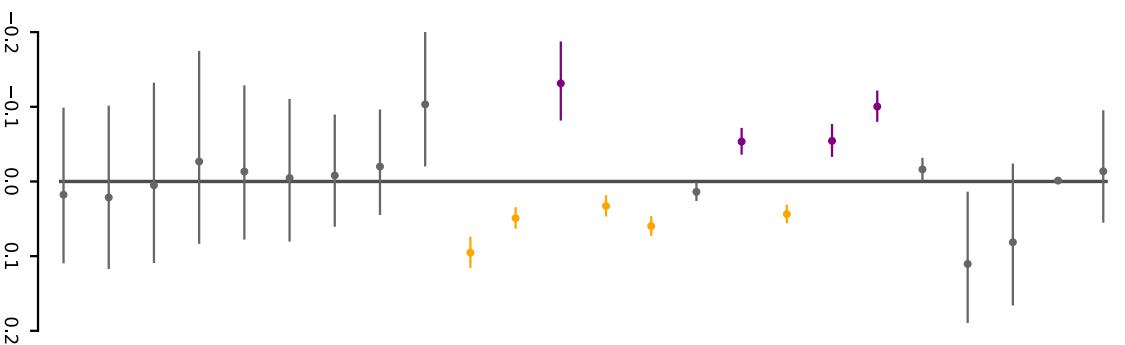

## WRITING

N = 3,620, adj-R<sup>2</sup> = 0.27

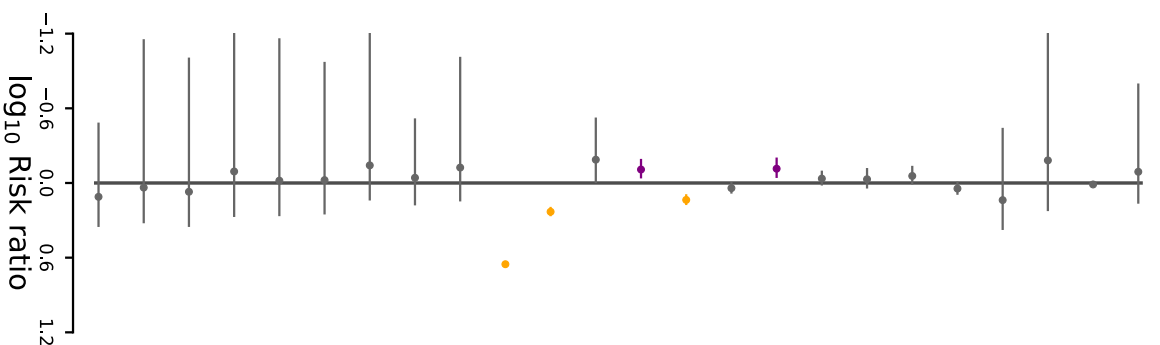

## DIRECTING

N = 3,664, pseudo-R<sup>2</sup> = 0.15

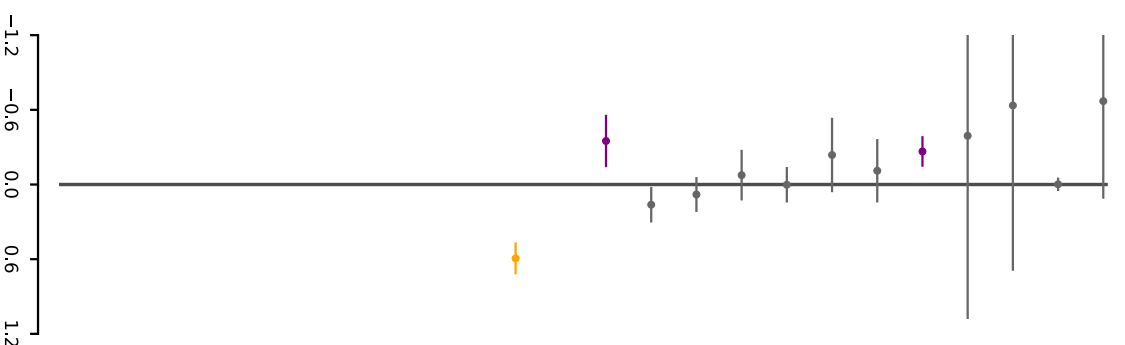

## CINEMATOGRAPHY

N = 3,638, pseudo-R<sup>2</sup> = 0.19

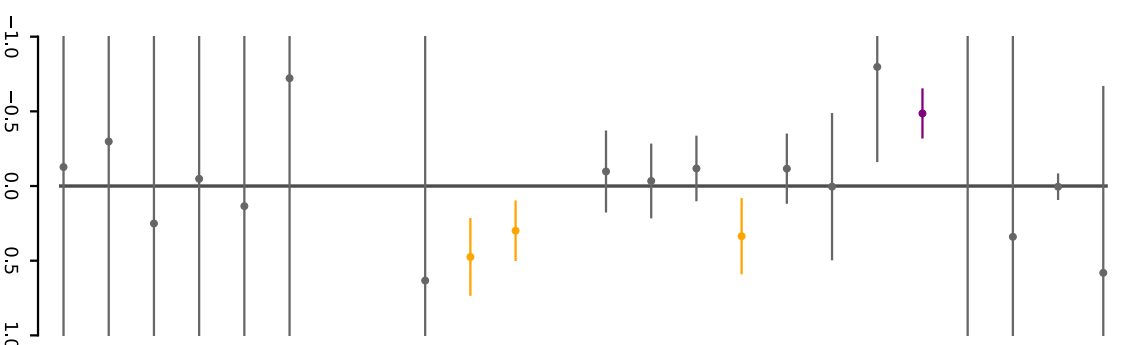

# 1963-2002

## ACTING ALL

N = 2,863, adj-R<sup>2</sup> = 0.22

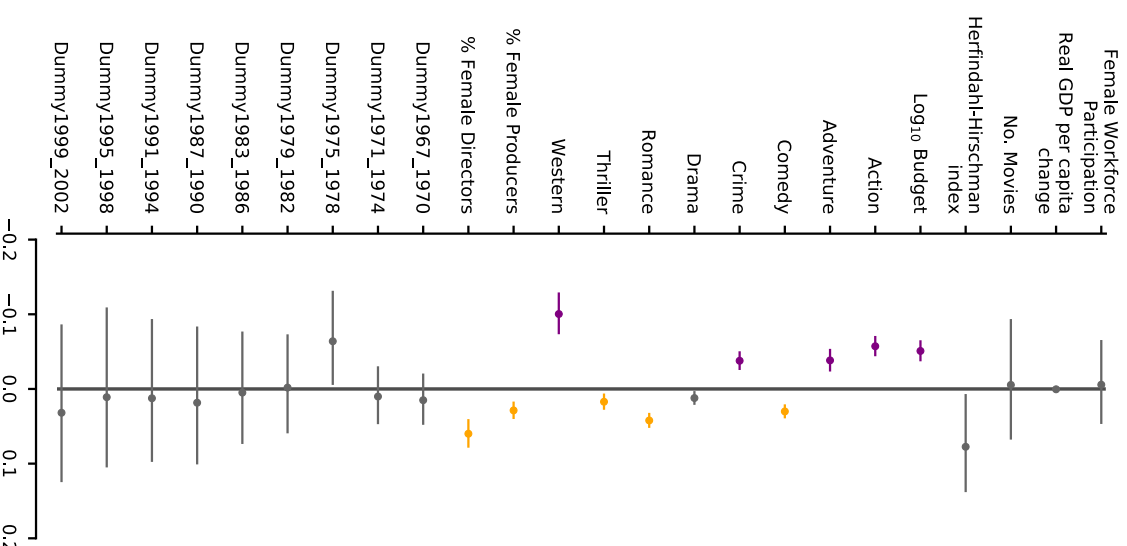

## ACTING CREDITED

N = 2,863, adj-R<sup>2</sup> = 0.20

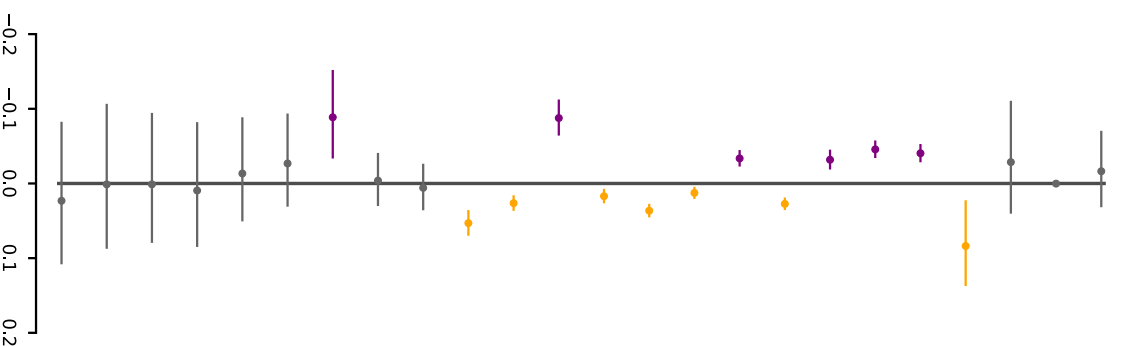

## WRITING

N = 2,844, adj-R<sup>2</sup> = 0.19

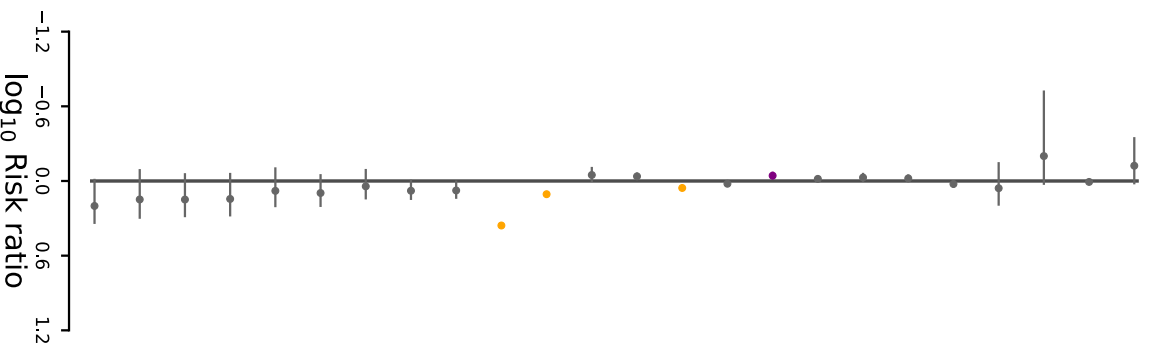

## DIRECTING

N = 2,863, pseudo-R<sup>2</sup> = 0.13

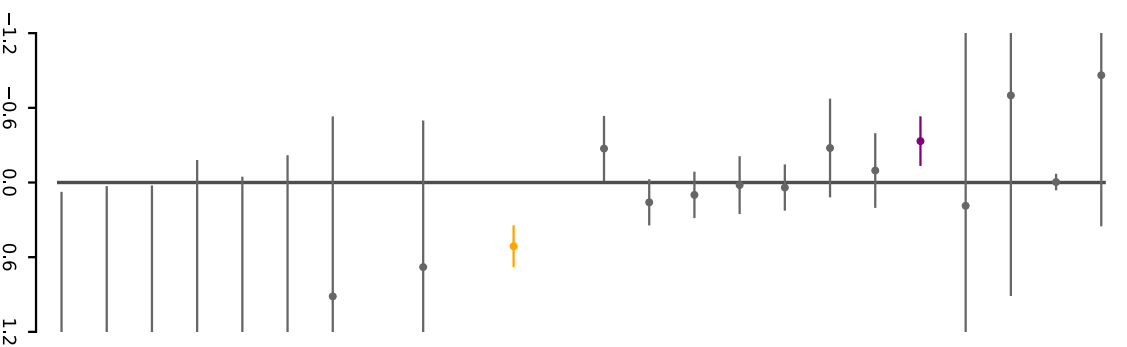

## CINEMATOGRAPHY

N = 2,848, pseudo-R<sup>2</sup> = 0.24

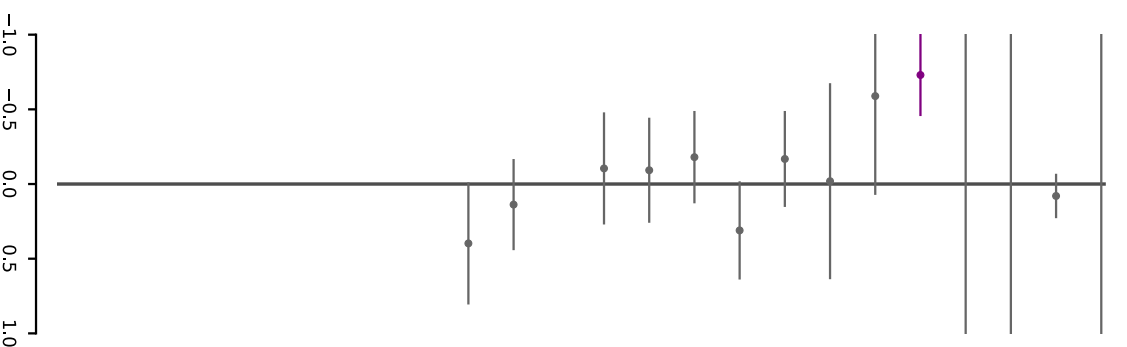

Supplement: pone.0229662.s007.pdf [file pone.0229662.s007.pdf]
