# Supplementary material for: Long-term patterns of gender imbalance in an industry without ability or level of interest differences
Source: PubMed Central journal article supplement (PMC7112163; doi:10.1371/journal.pone.0229662), 2020-04-01

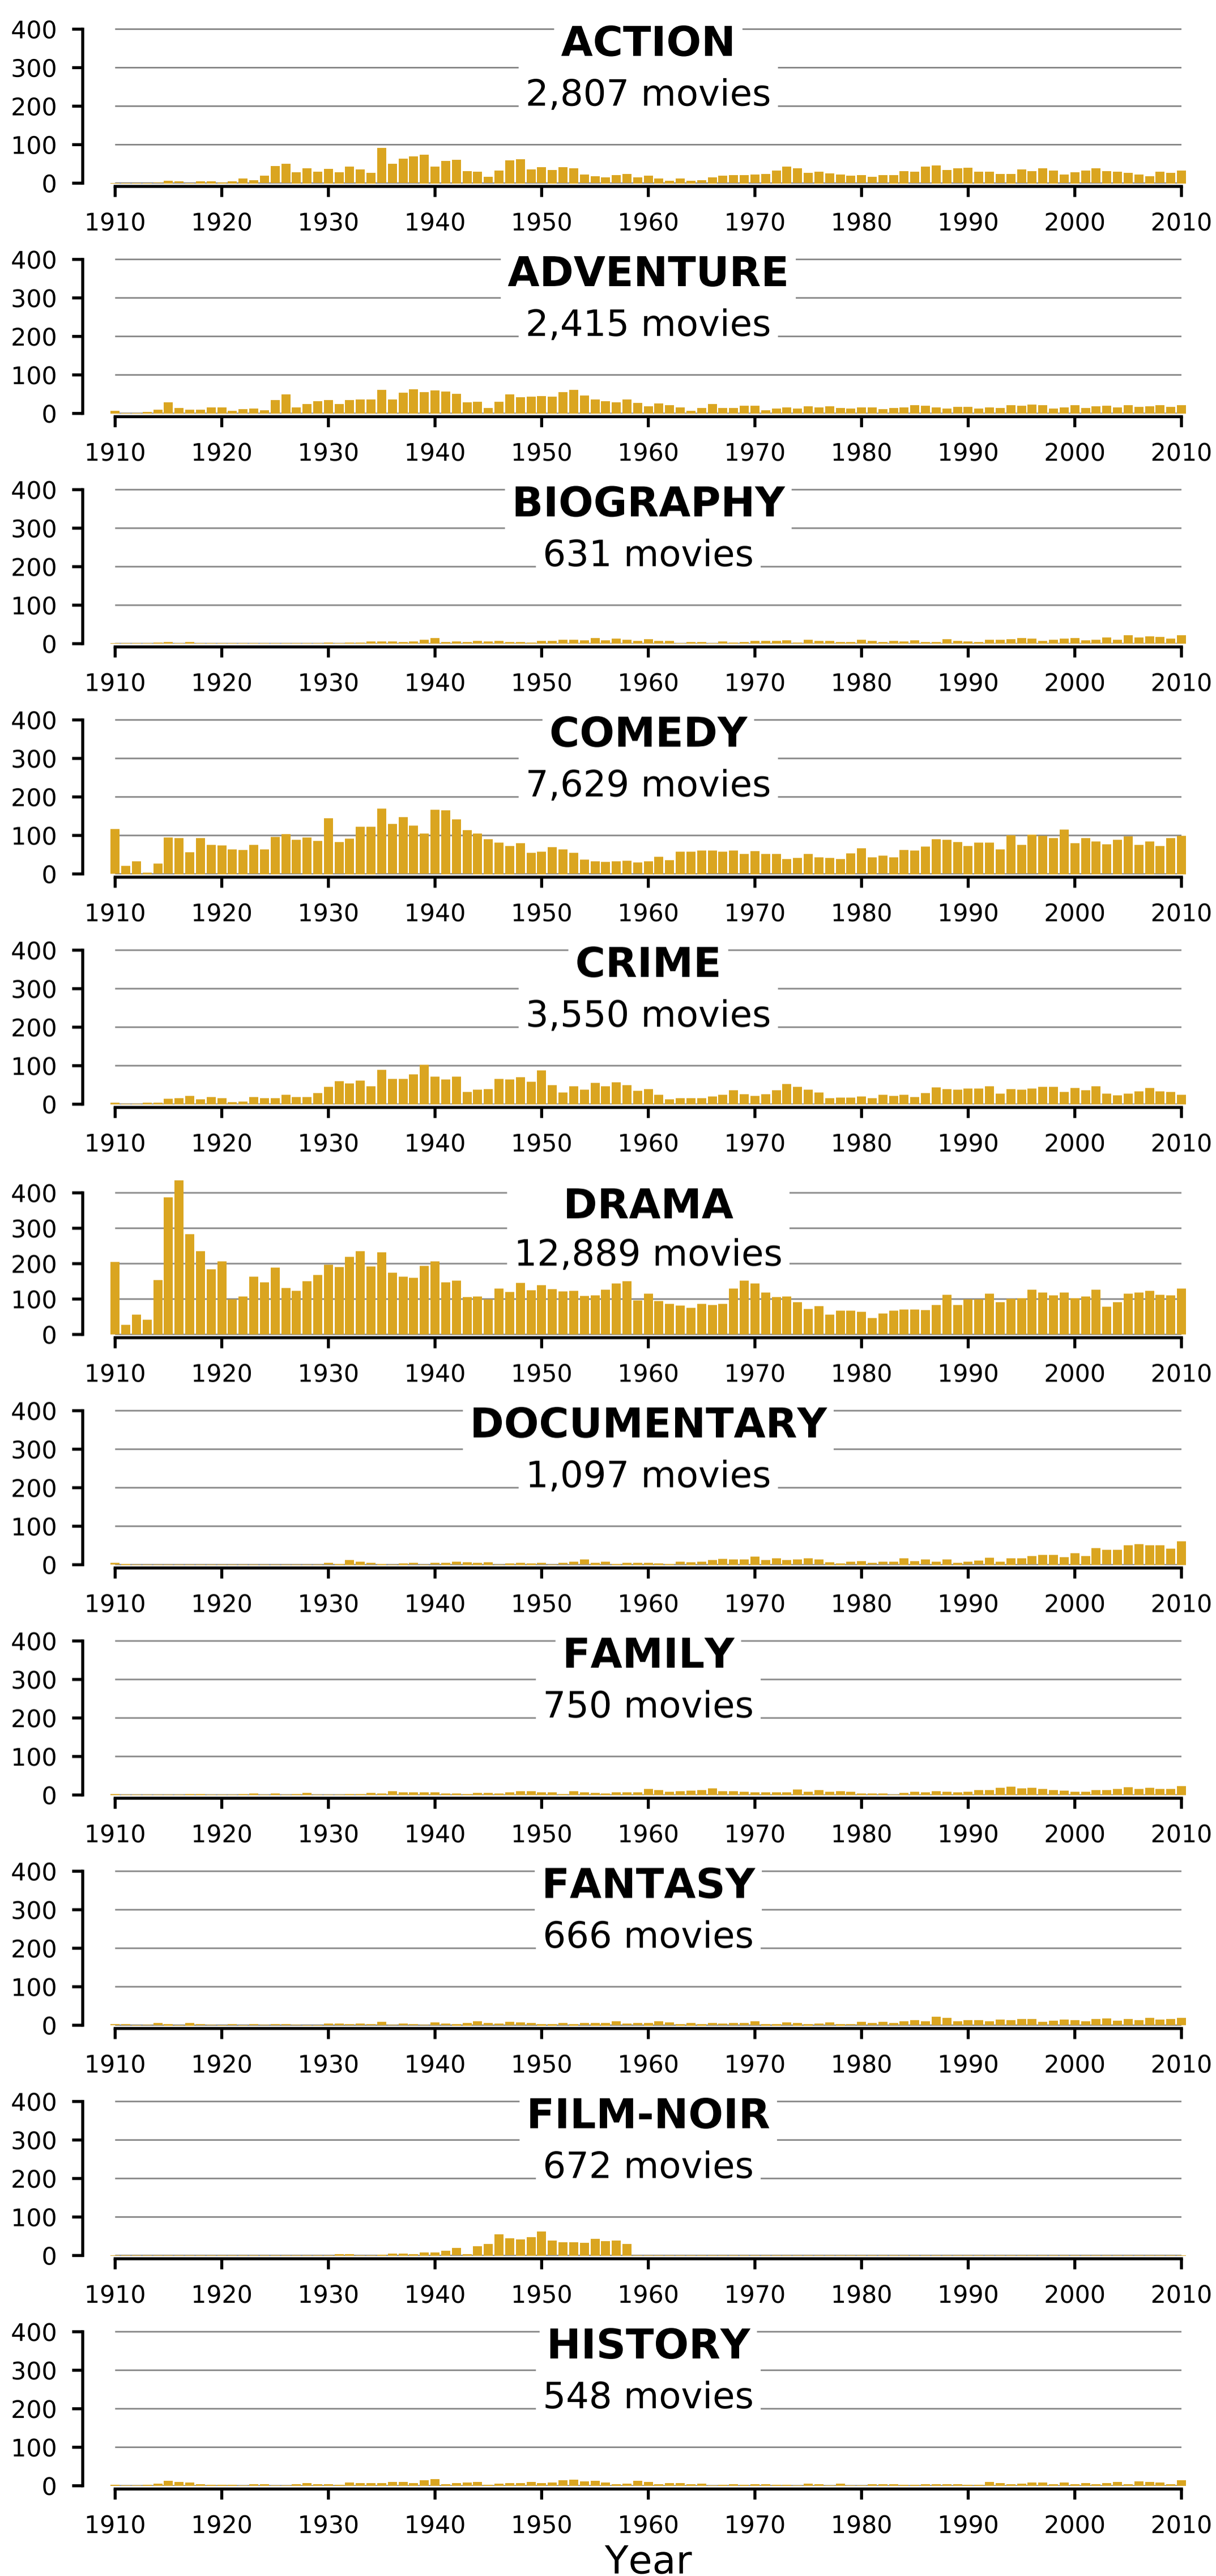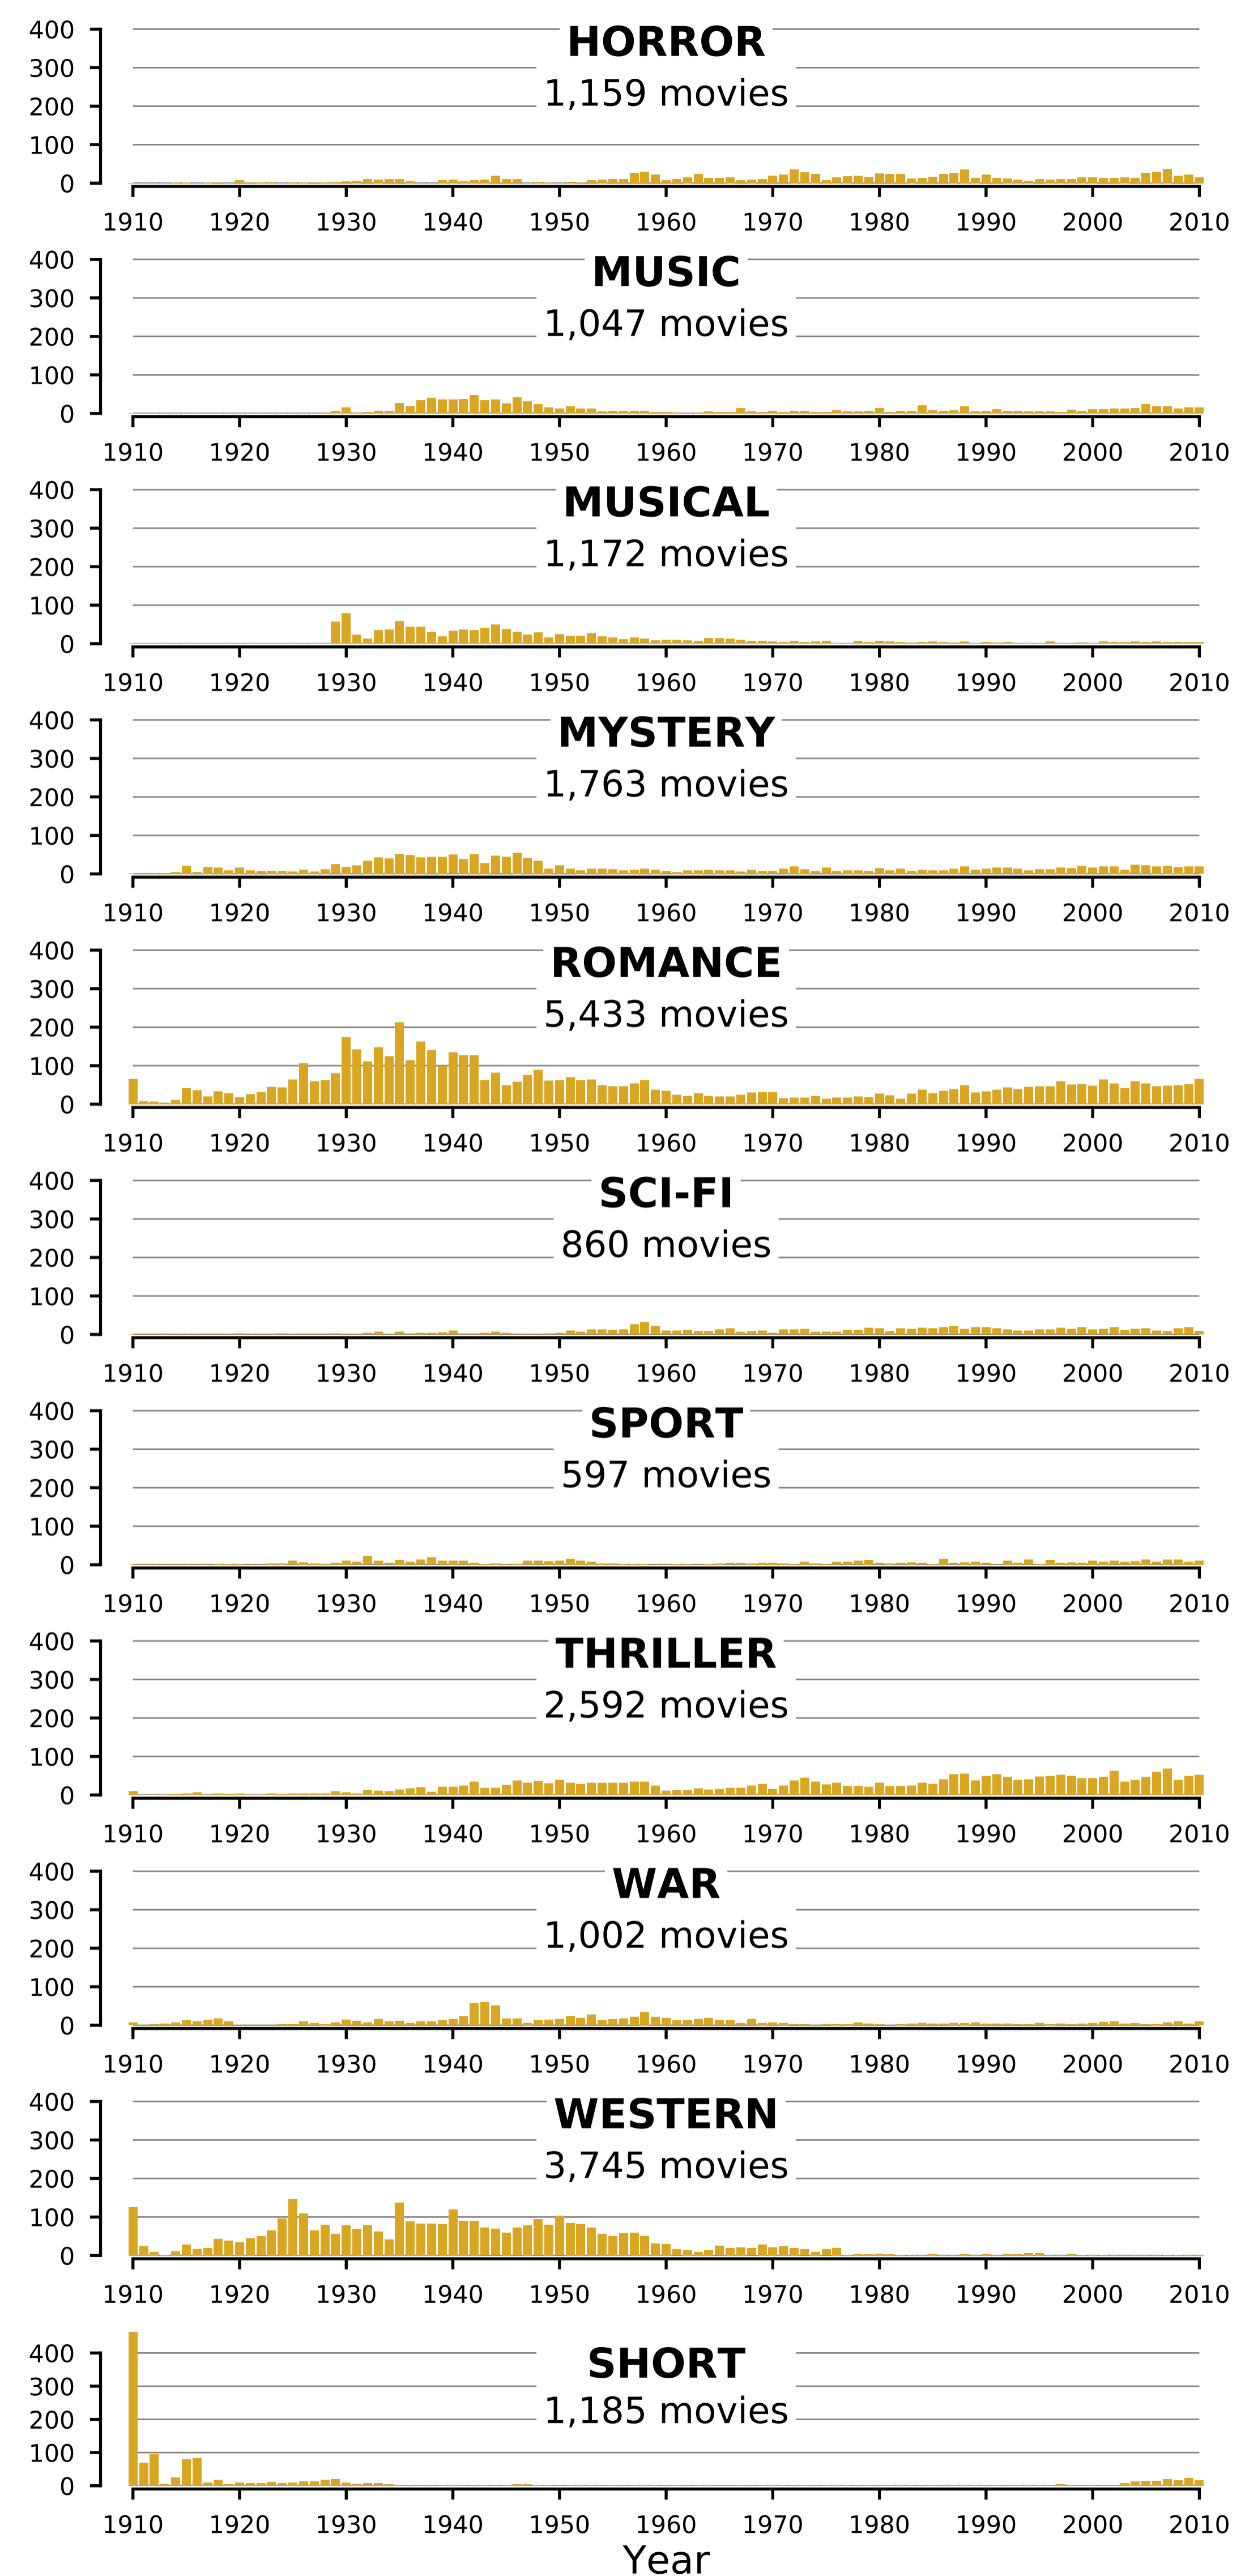

Supplement: pone.0229662.s001.pdf [file pone.0229662.s001.pdf]
