# Supplementary material for: Long-term patterns of gender imbalance in an industry without ability or level of interest differences
Source: PubMed Central journal article supplement (PMC7112163; doi:10.1371/journal.pone.0229662), 2020-04-01

**1911-1950**

**ACTING ALL**

**ACTING CREDITED**

**WRITING**

**DIRECTING**

**PRODUCING**

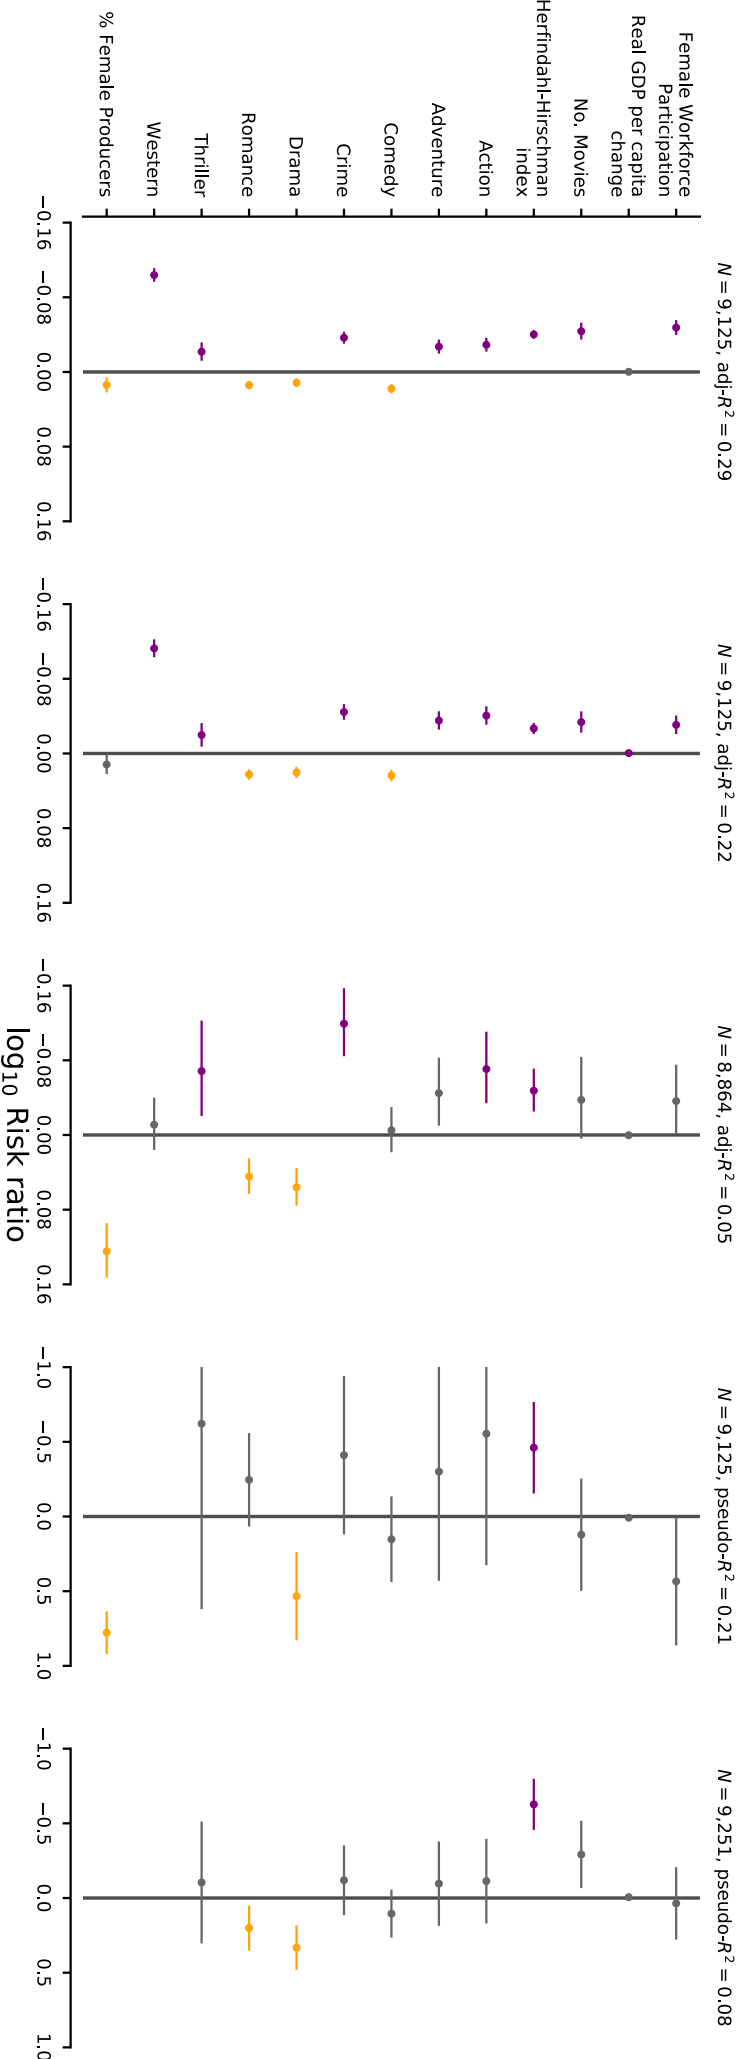

### 1916-1950

### ACTING ALL

### ACTING CREDITED

### WRITING

### DIRECTING

### PRODUCING

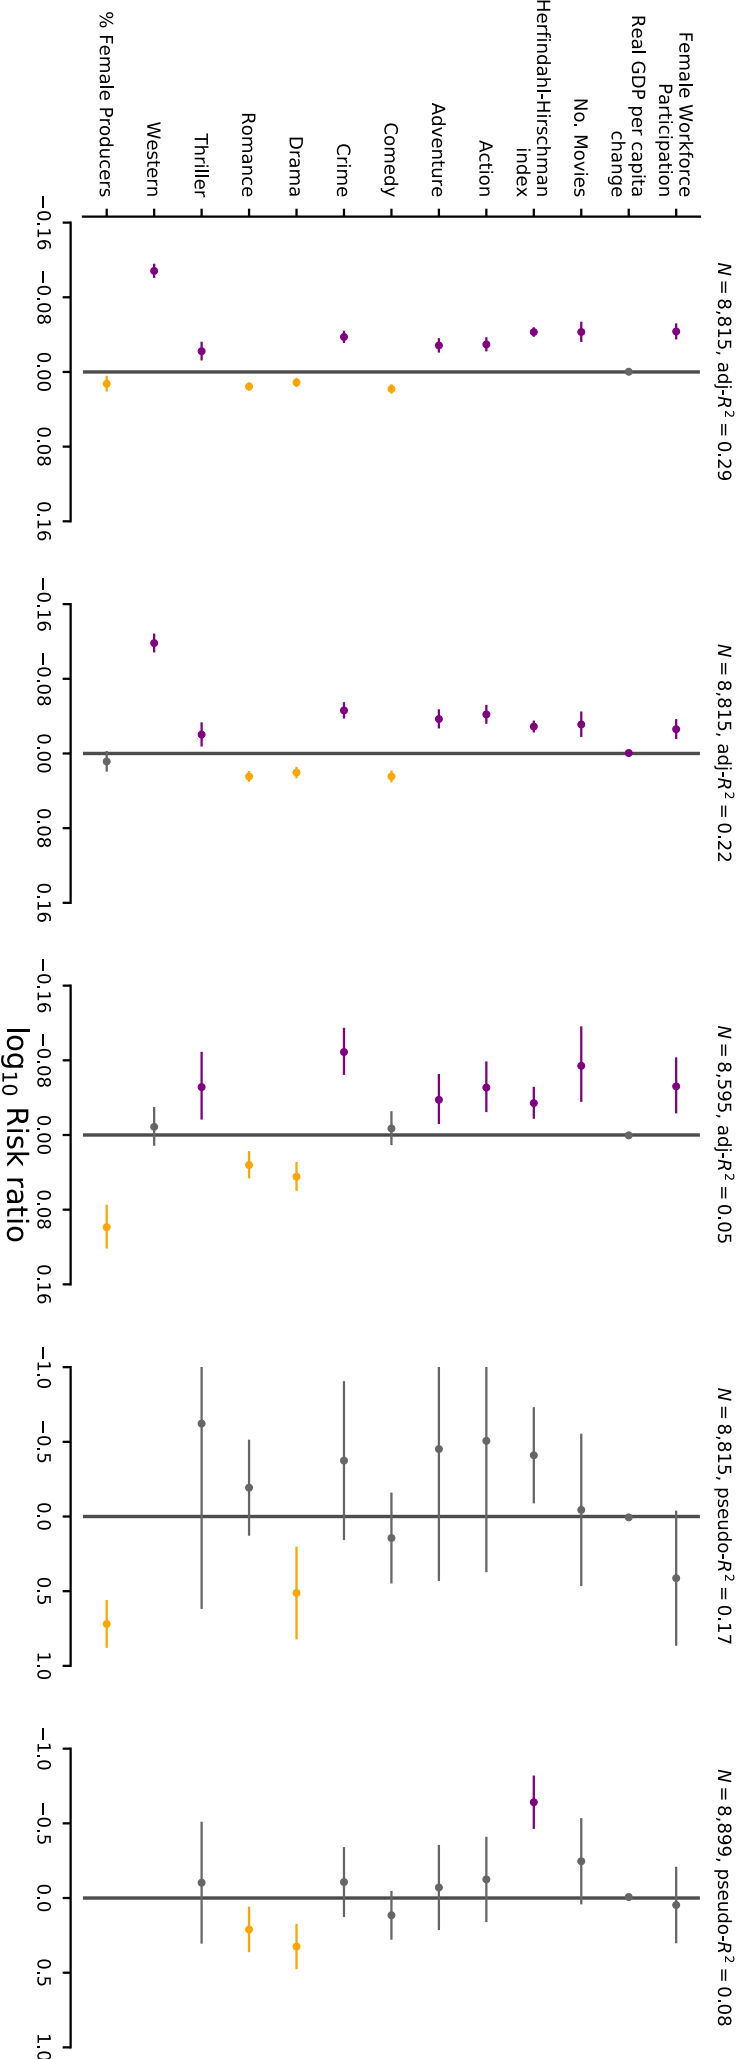

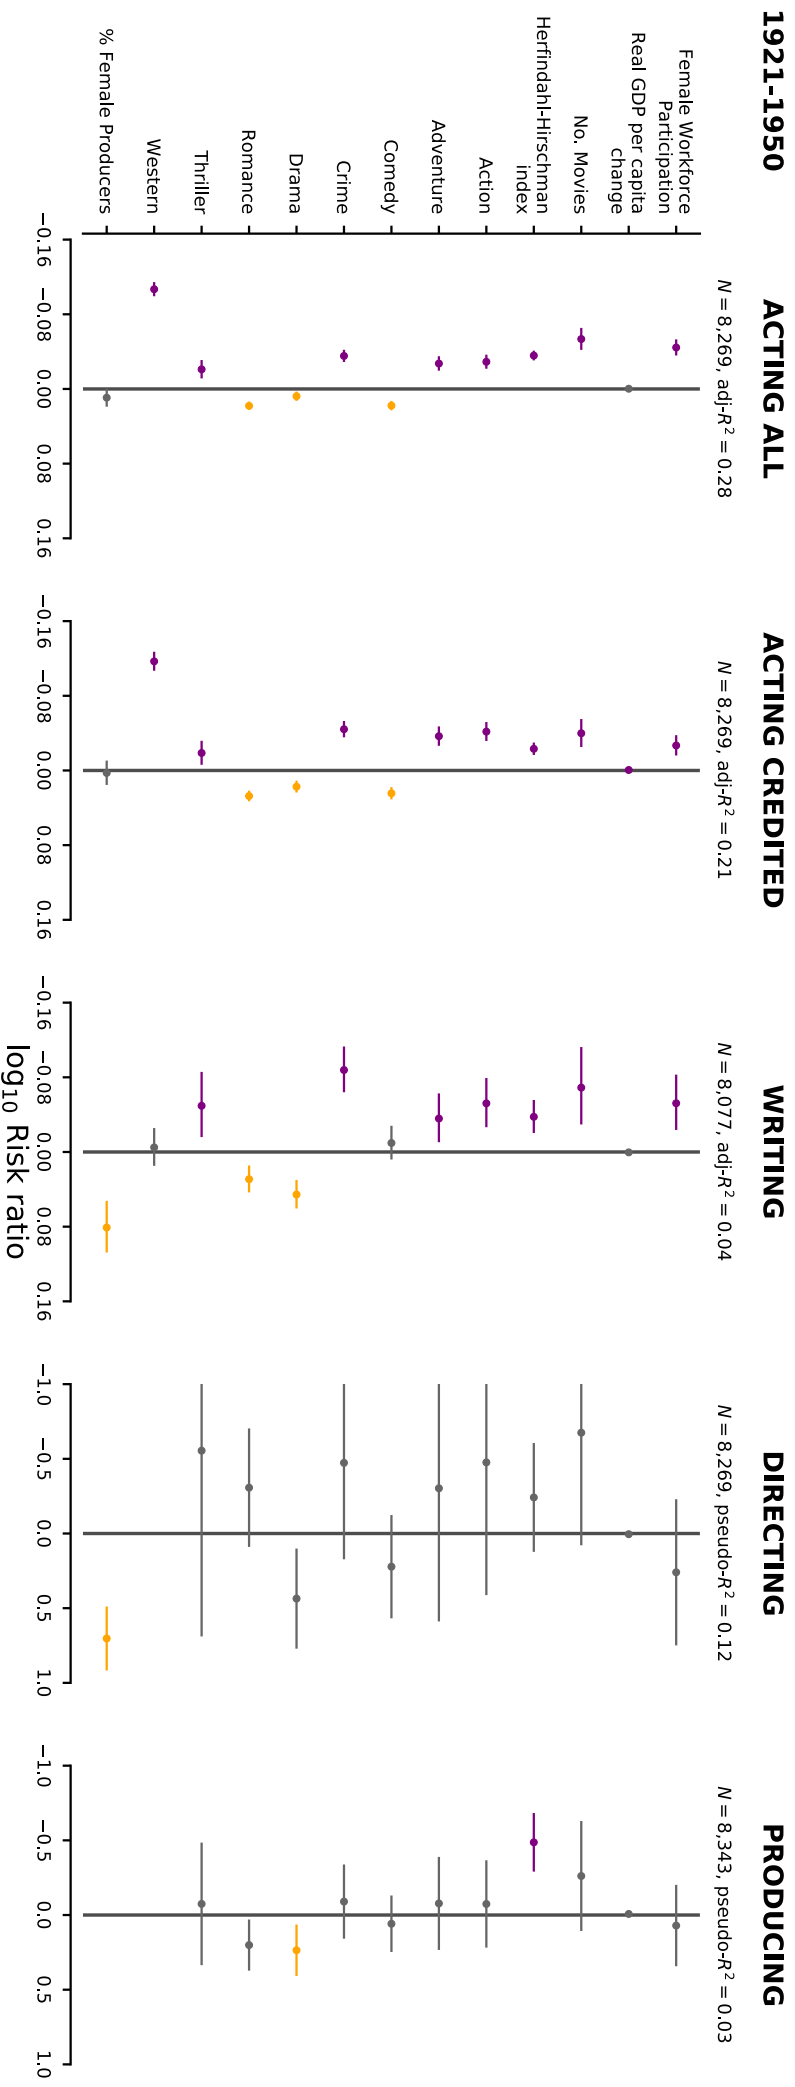

# 1916-1945

## ACTING ALL

N = 7,412, adj-R<sup>2</sup> = 0.30

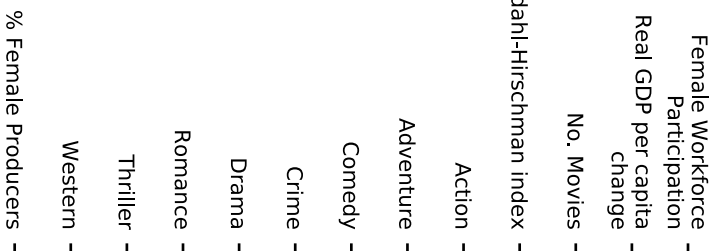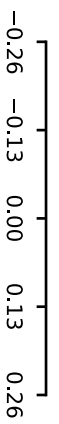

## ACTING CREDITED

N = 7,412, adj-R<sup>2</sup> = 0.22

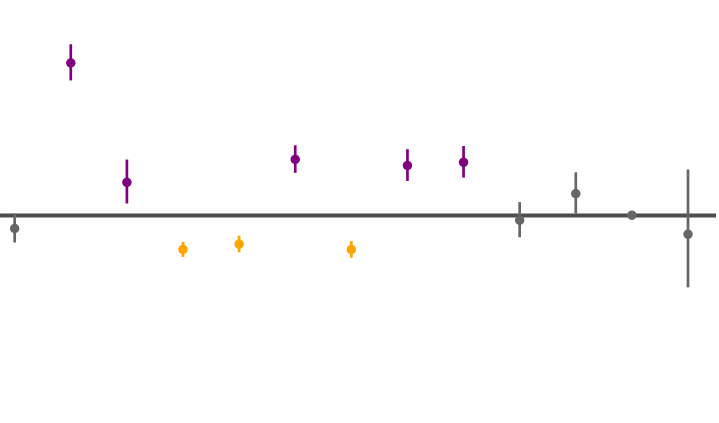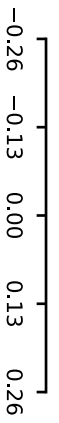

## WRITING

N = 7,153, adj-R<sup>2</sup> = 0.04

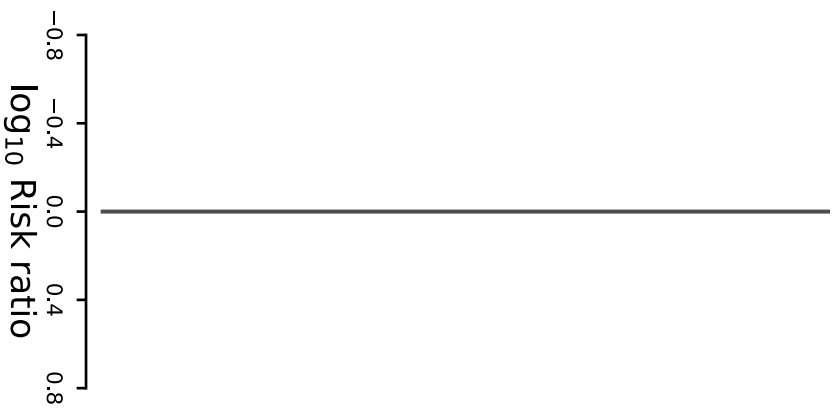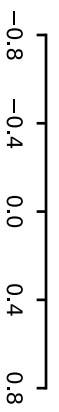

## DIRECTING

N = 7,339, pseudo-R<sup>2</sup> = 0.22

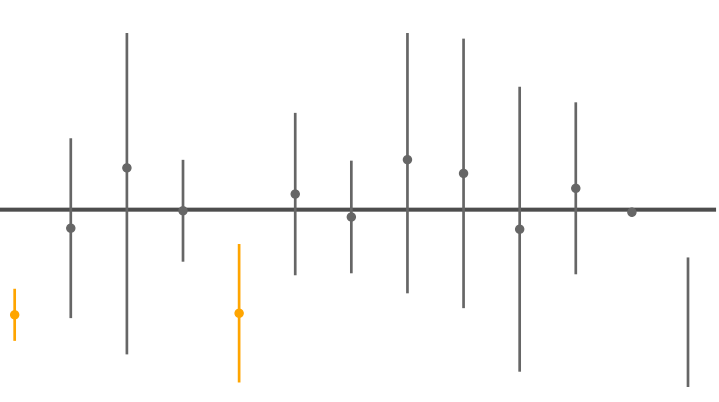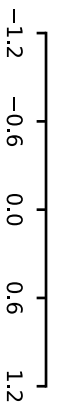

Supplement: pone.0229662.s002.pdf [file pone.0229662.s002.pdf]
