# Supplementary material for: Long-term patterns of gender imbalance in an industry without ability or level of interest differences
Source: PubMed Central journal article supplement (PMC7112163; doi:10.1371/journal.pone.0229662), 2020-04-01

1911-1950

ACTING ALL

N = 9,125, adj-R<sup>2</sup> = 0.32

ACTING CREDITED

N = 9,125, adj-R<sup>2</sup> = 0.23

WRITING

N = 8,864, adj-R<sup>2</sup> = 0.05

DIRECTING

N = 9,125, pseudo-R<sup>2</sup> = 0.27

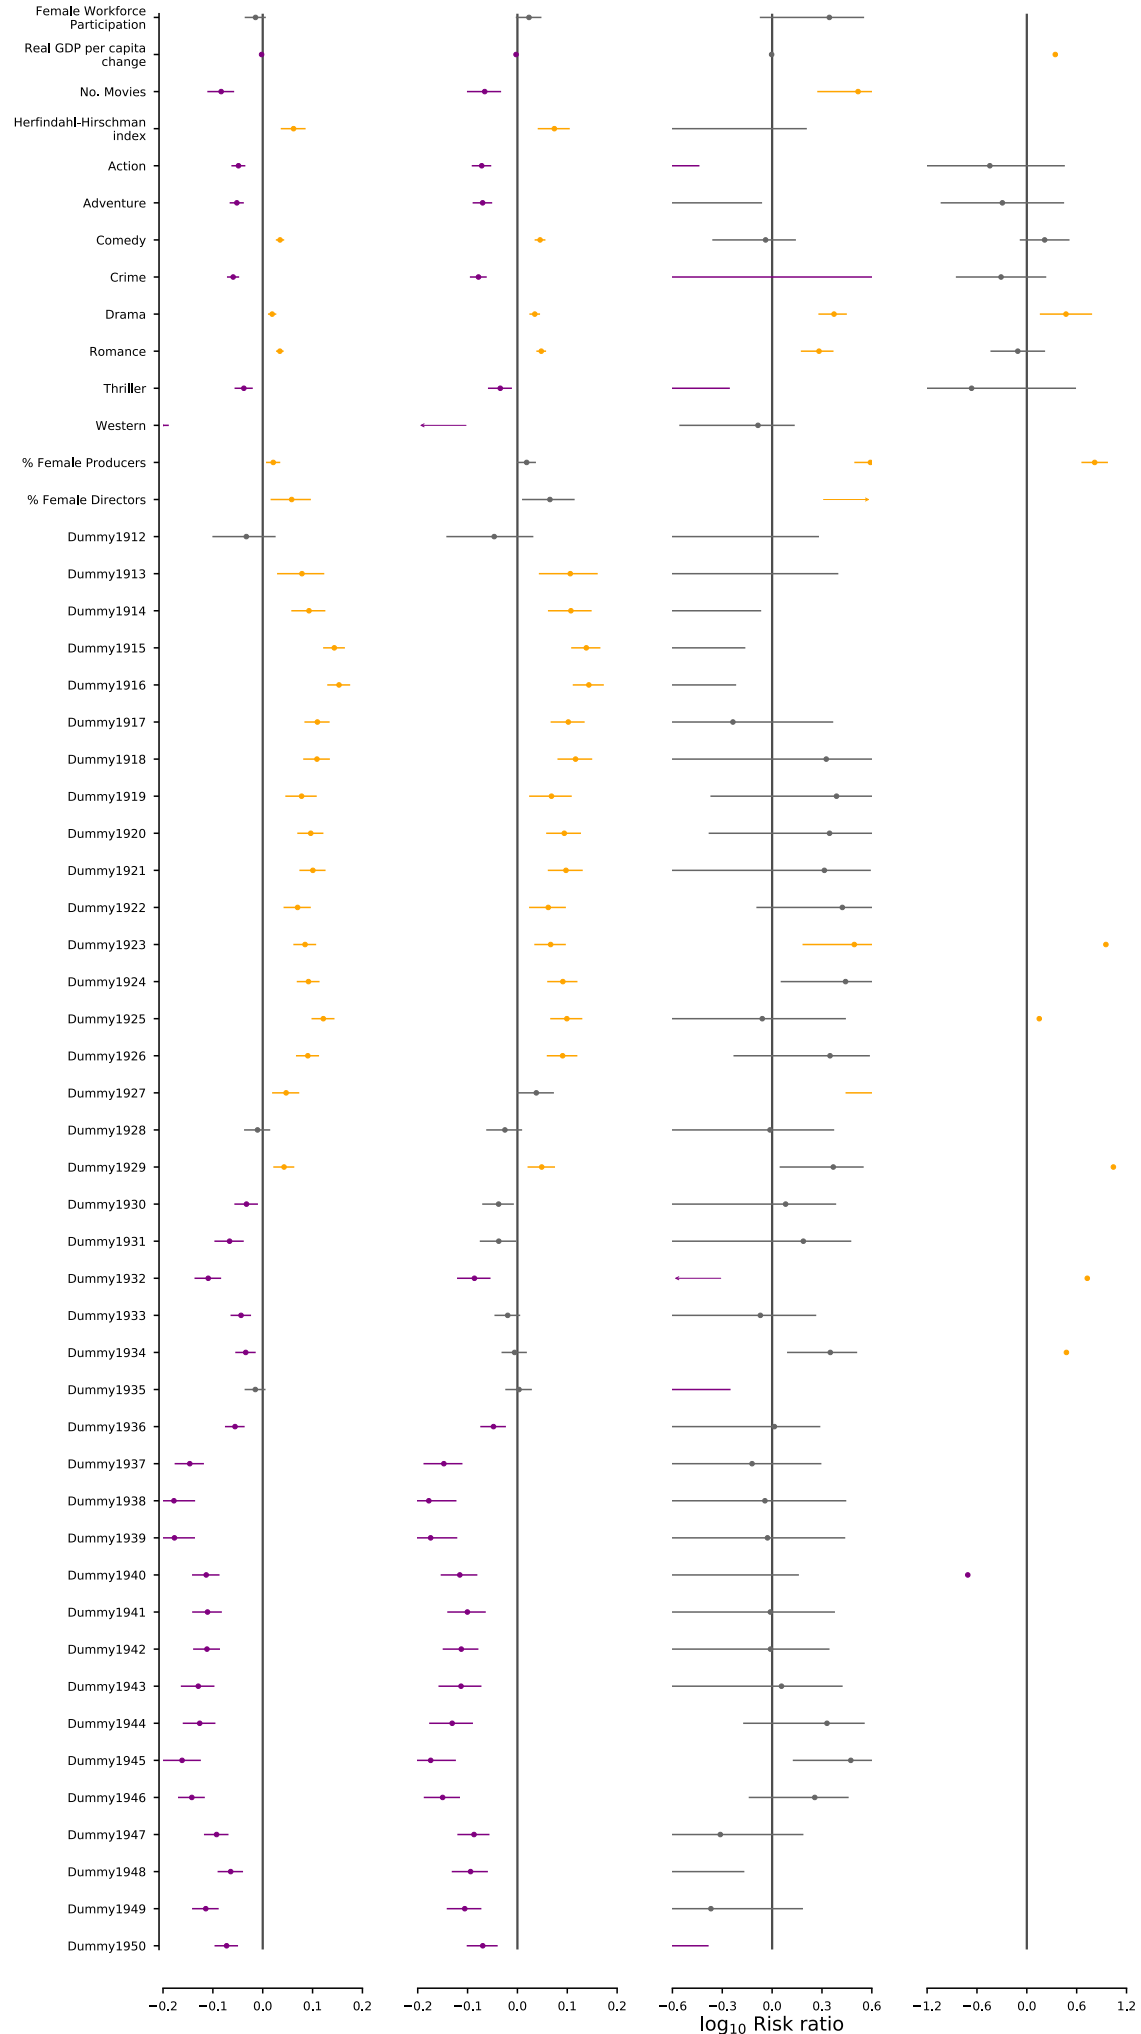

1916-1950

ACTING ALL

ACTING CREDITED

WRITING

DIRECTING

N = 8,815, adj-R<sup>2</sup> = 0.31

N = 8,815, adj-R<sup>2</sup> = 0.23

N = 8,595, adj-R<sup>2</sup> = 0.05

N = 8,815, pseudo-R<sup>2</sup> = 0.23

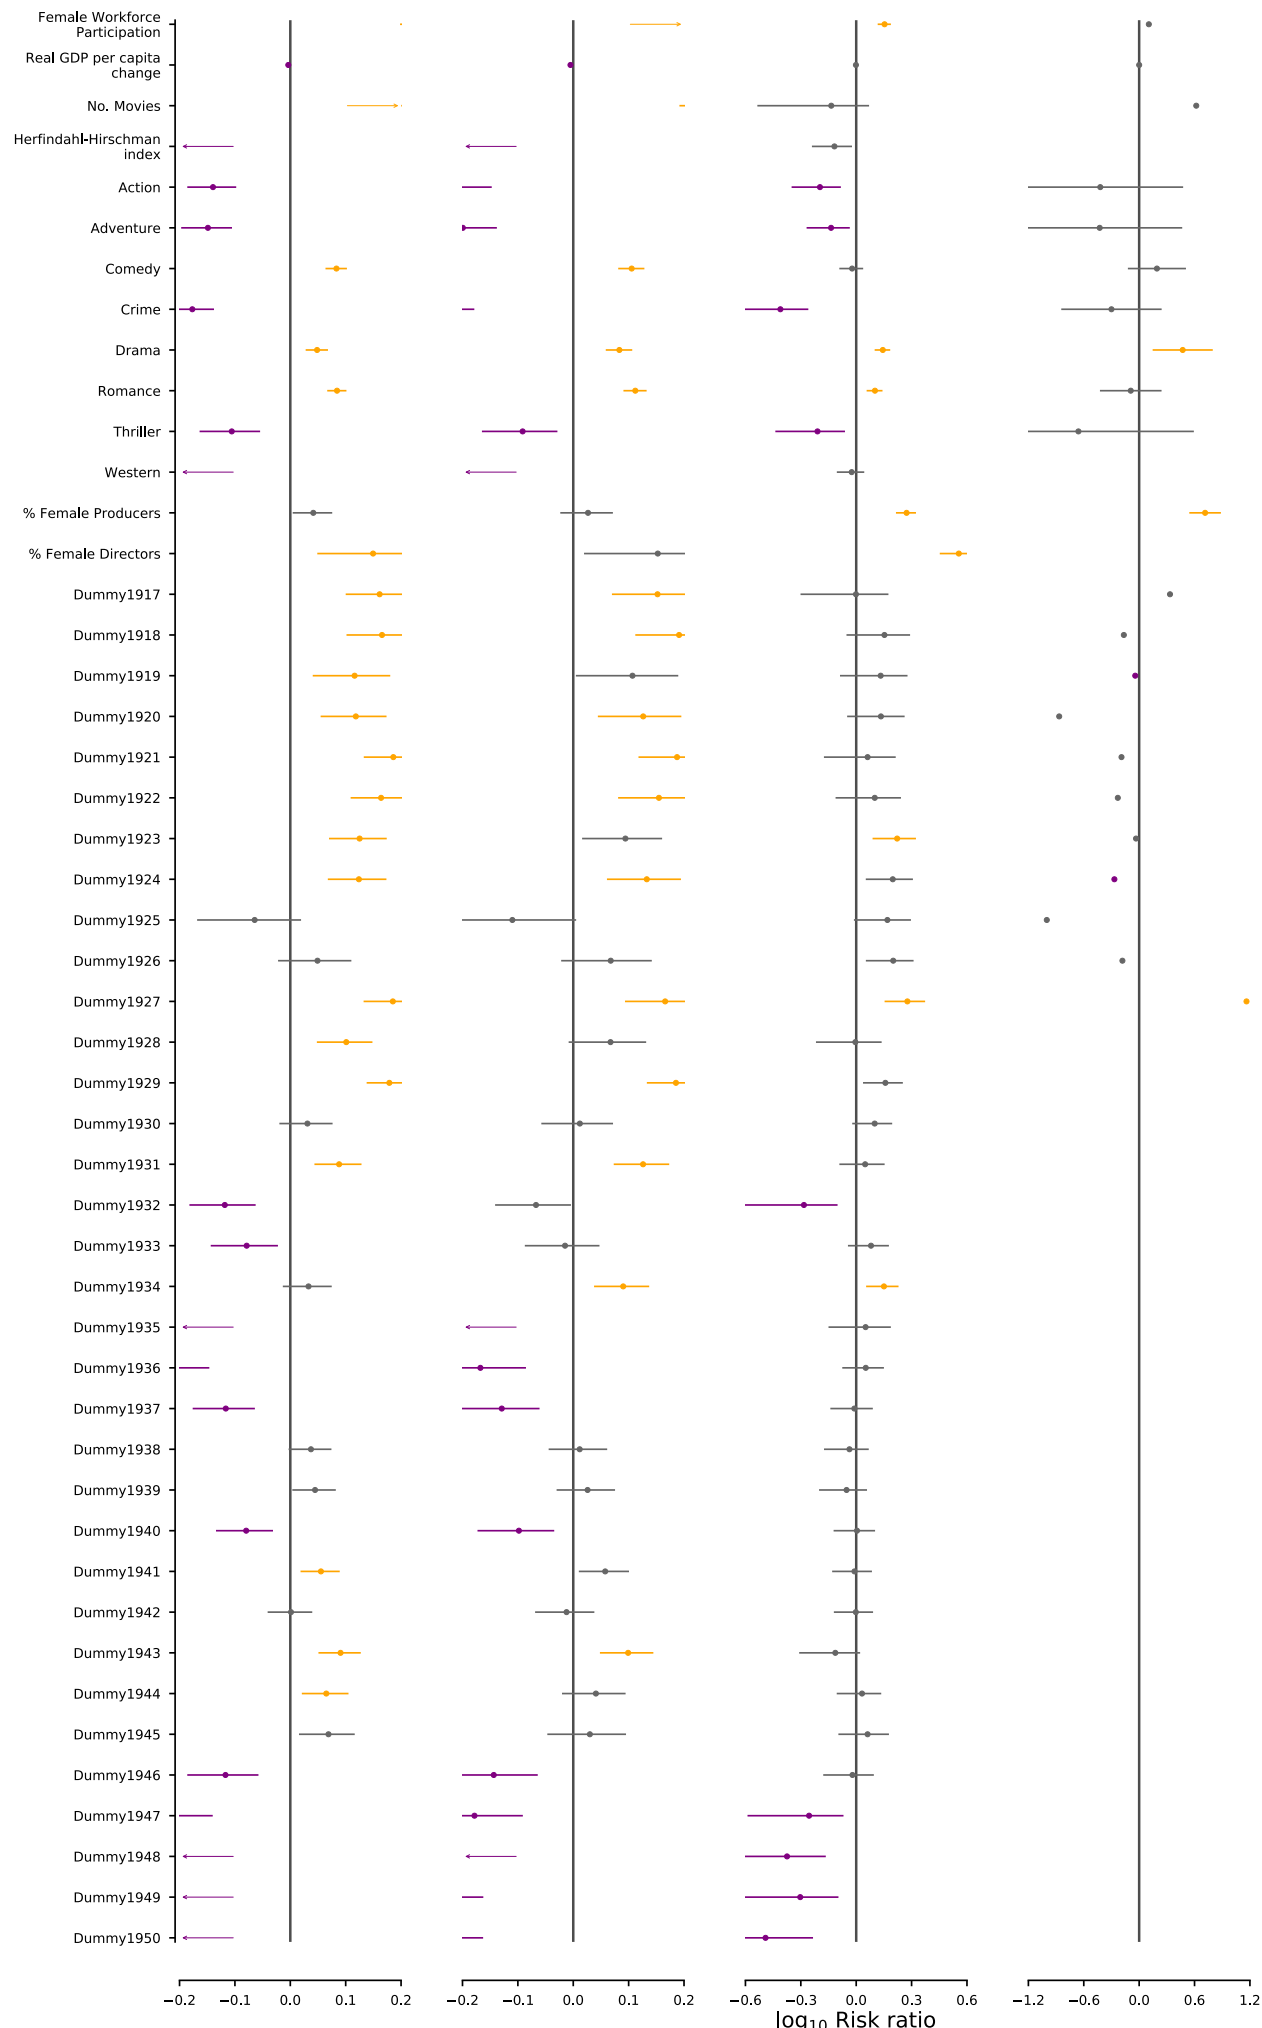



**1916-1960****ACTING ALL****ACTING CREDITED****WRITING**N = 11,232, adj-R<sup>2</sup> = 0.29N = 11,232, adj-R<sup>2</sup> = 0.21N = 11,002, adj-R<sup>2</sup> = 0.06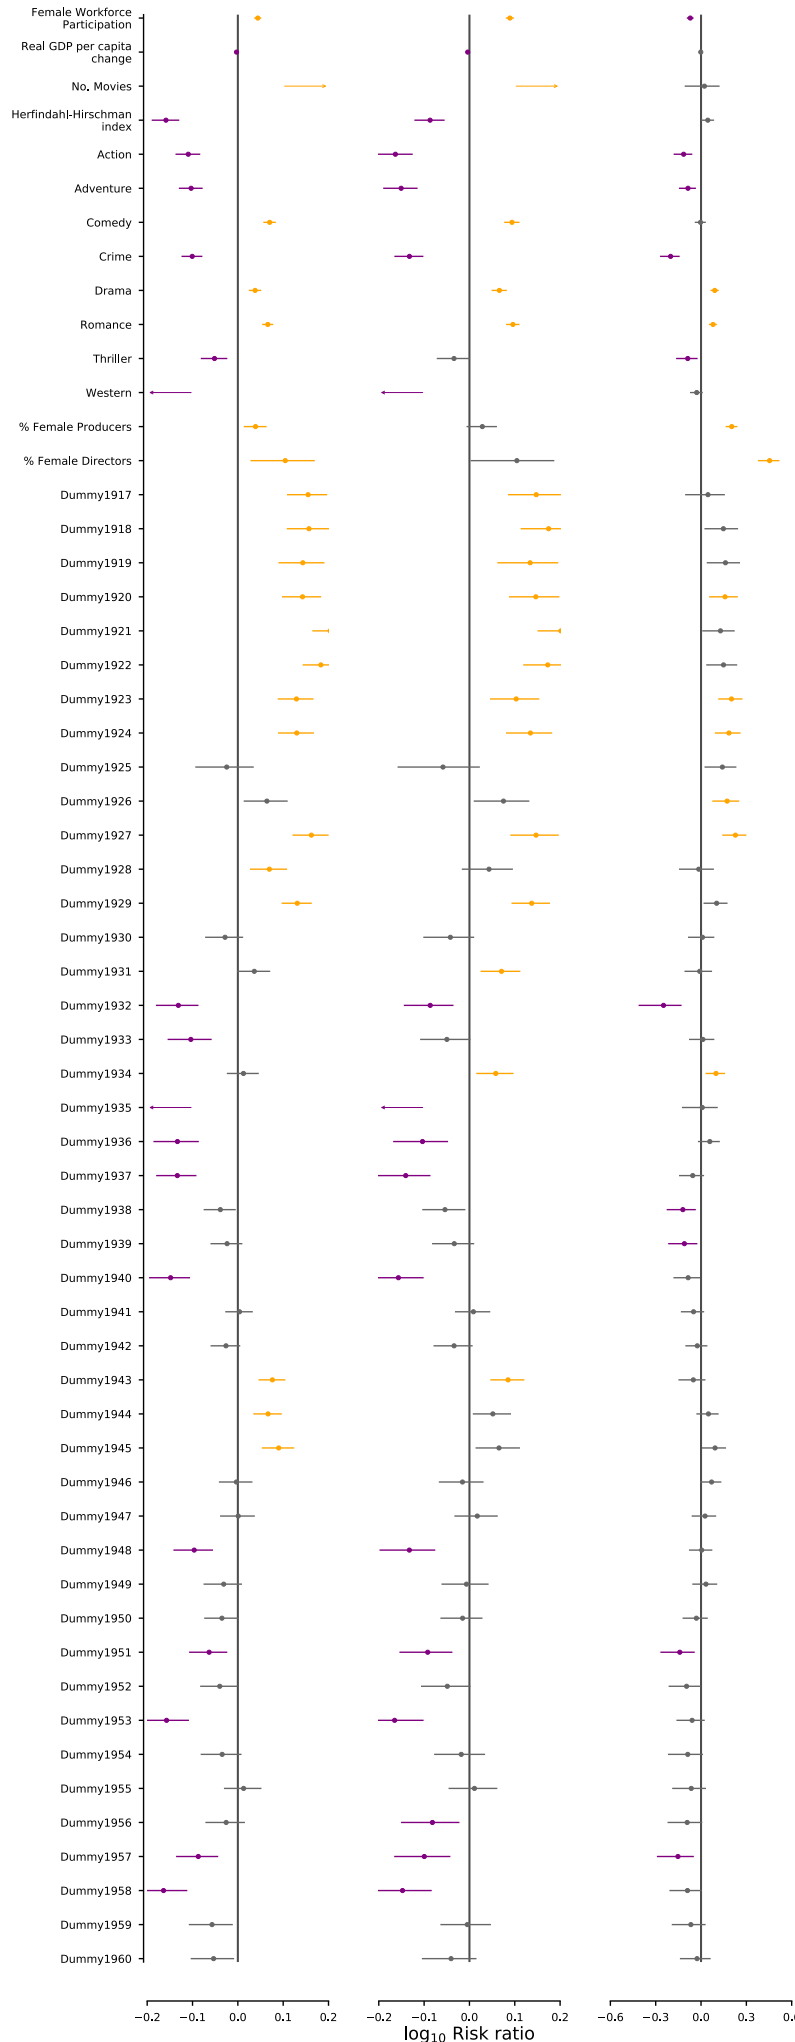

Supplement: pone.0229662.s004.pdf [file pone.0229662.s004.pdf]
