# Supplementary material for: Long-term patterns of gender imbalance in an industry without ability or level of interest differences
Source: PubMed Central journal article supplement (PMC7112163; doi:10.1371/journal.pone.0229662), 2020-04-01
Supplement: pone.0229662.s005.pdf [file pone.0229662.s005.pdf]

1951-2010

ACTING ALL  
N = 4,533, adj-R<sup>2</sup> = 0.23

ACTING CREDITED  
N = 4,533, adj-R<sup>2</sup> = 0.19

WRITING  
N = 4,484, adj-R<sup>2</sup> = 0.24

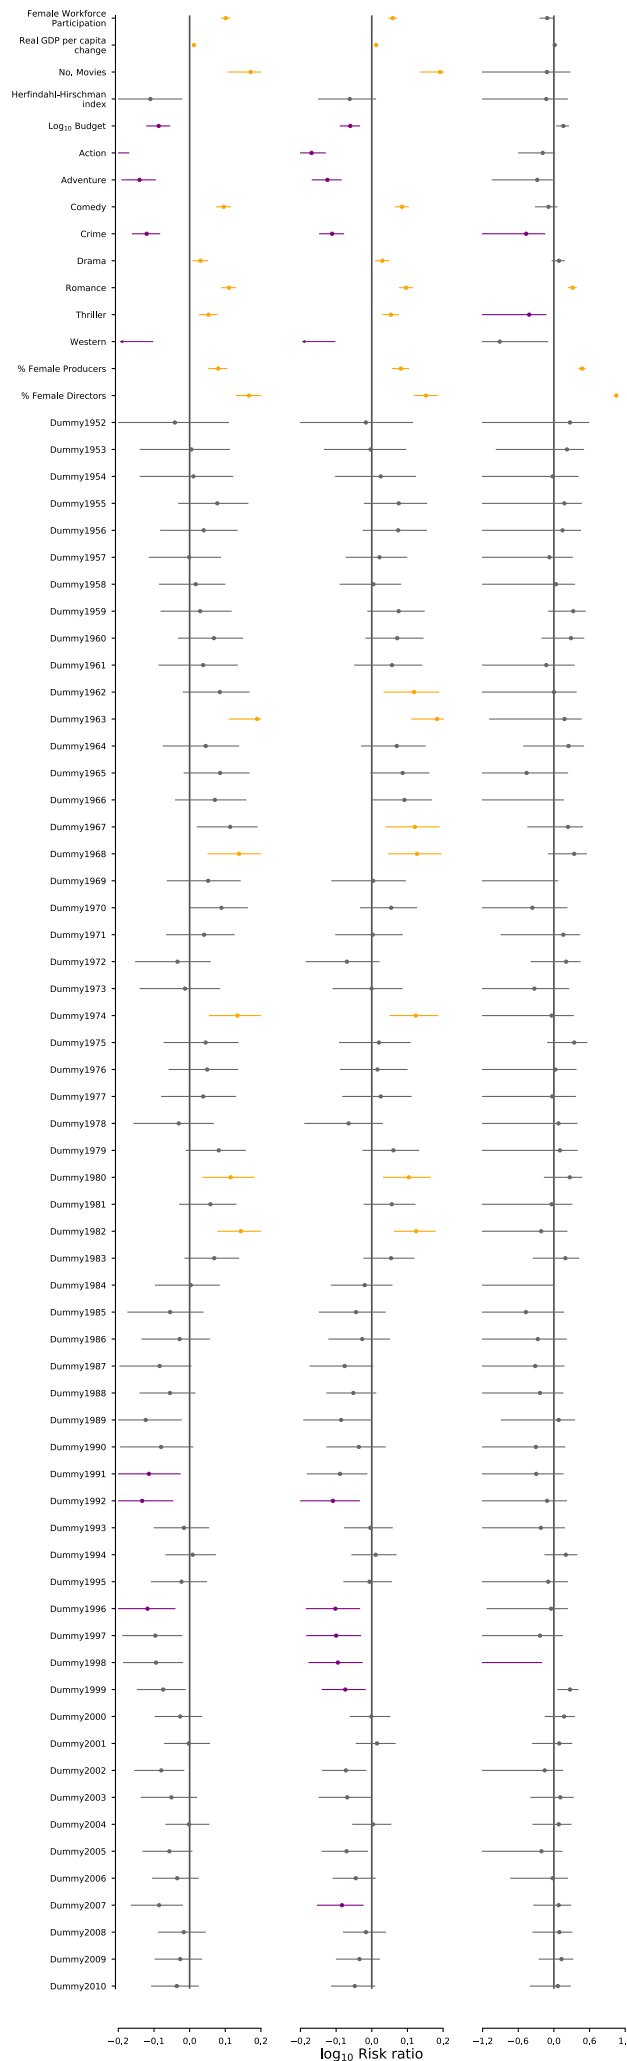

**1961-2010****ACTING ALL****ACTING CREDITED****WRITING****DIRECTING**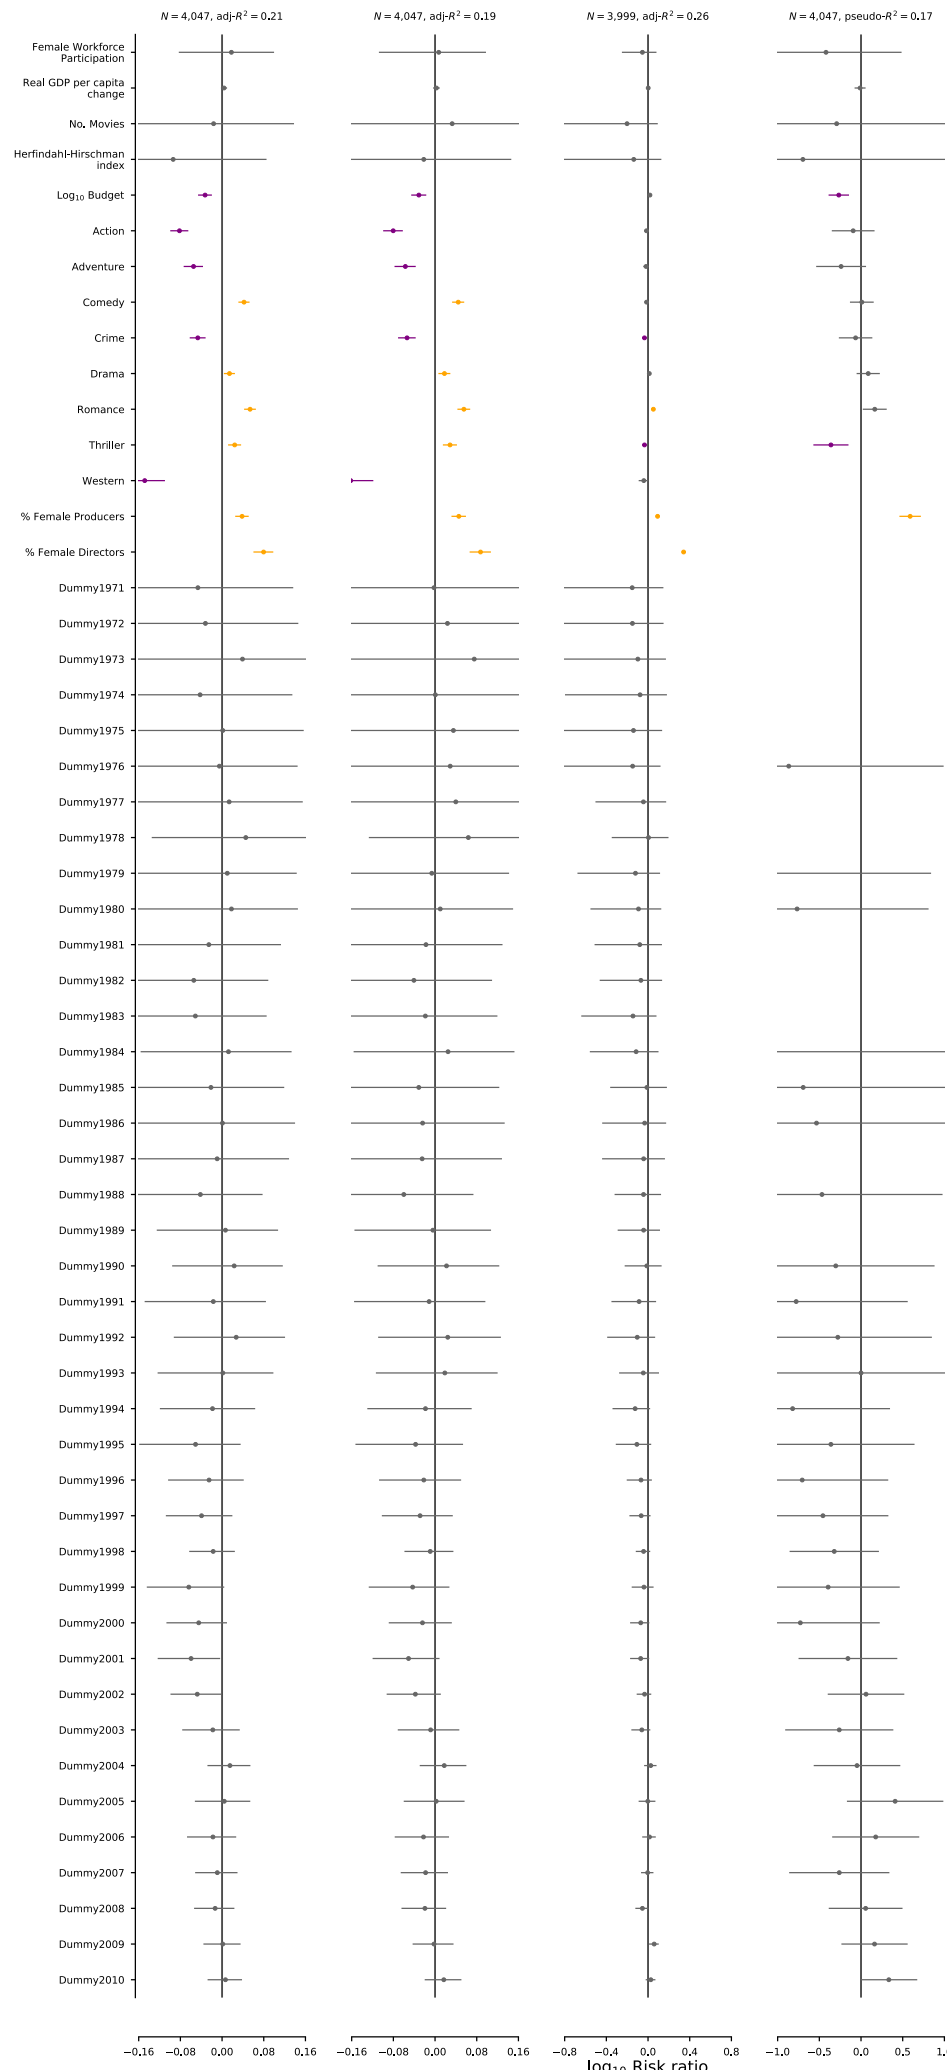

**1971-2010****ACTING ALL****ACTING CREDITED****WRITING****DIRECTING****CINEMATOGRAPHY**N = 3,664, adj-R<sup>2</sup> = 0.21N = 3,664, adj-R<sup>2</sup> = 0.19N = 3,620, adj-R<sup>2</sup> = 0.27N = 3,664, pseudo-R<sup>2</sup> = 0.16N = 3,638, pseudo-R<sup>2</sup> = 0.22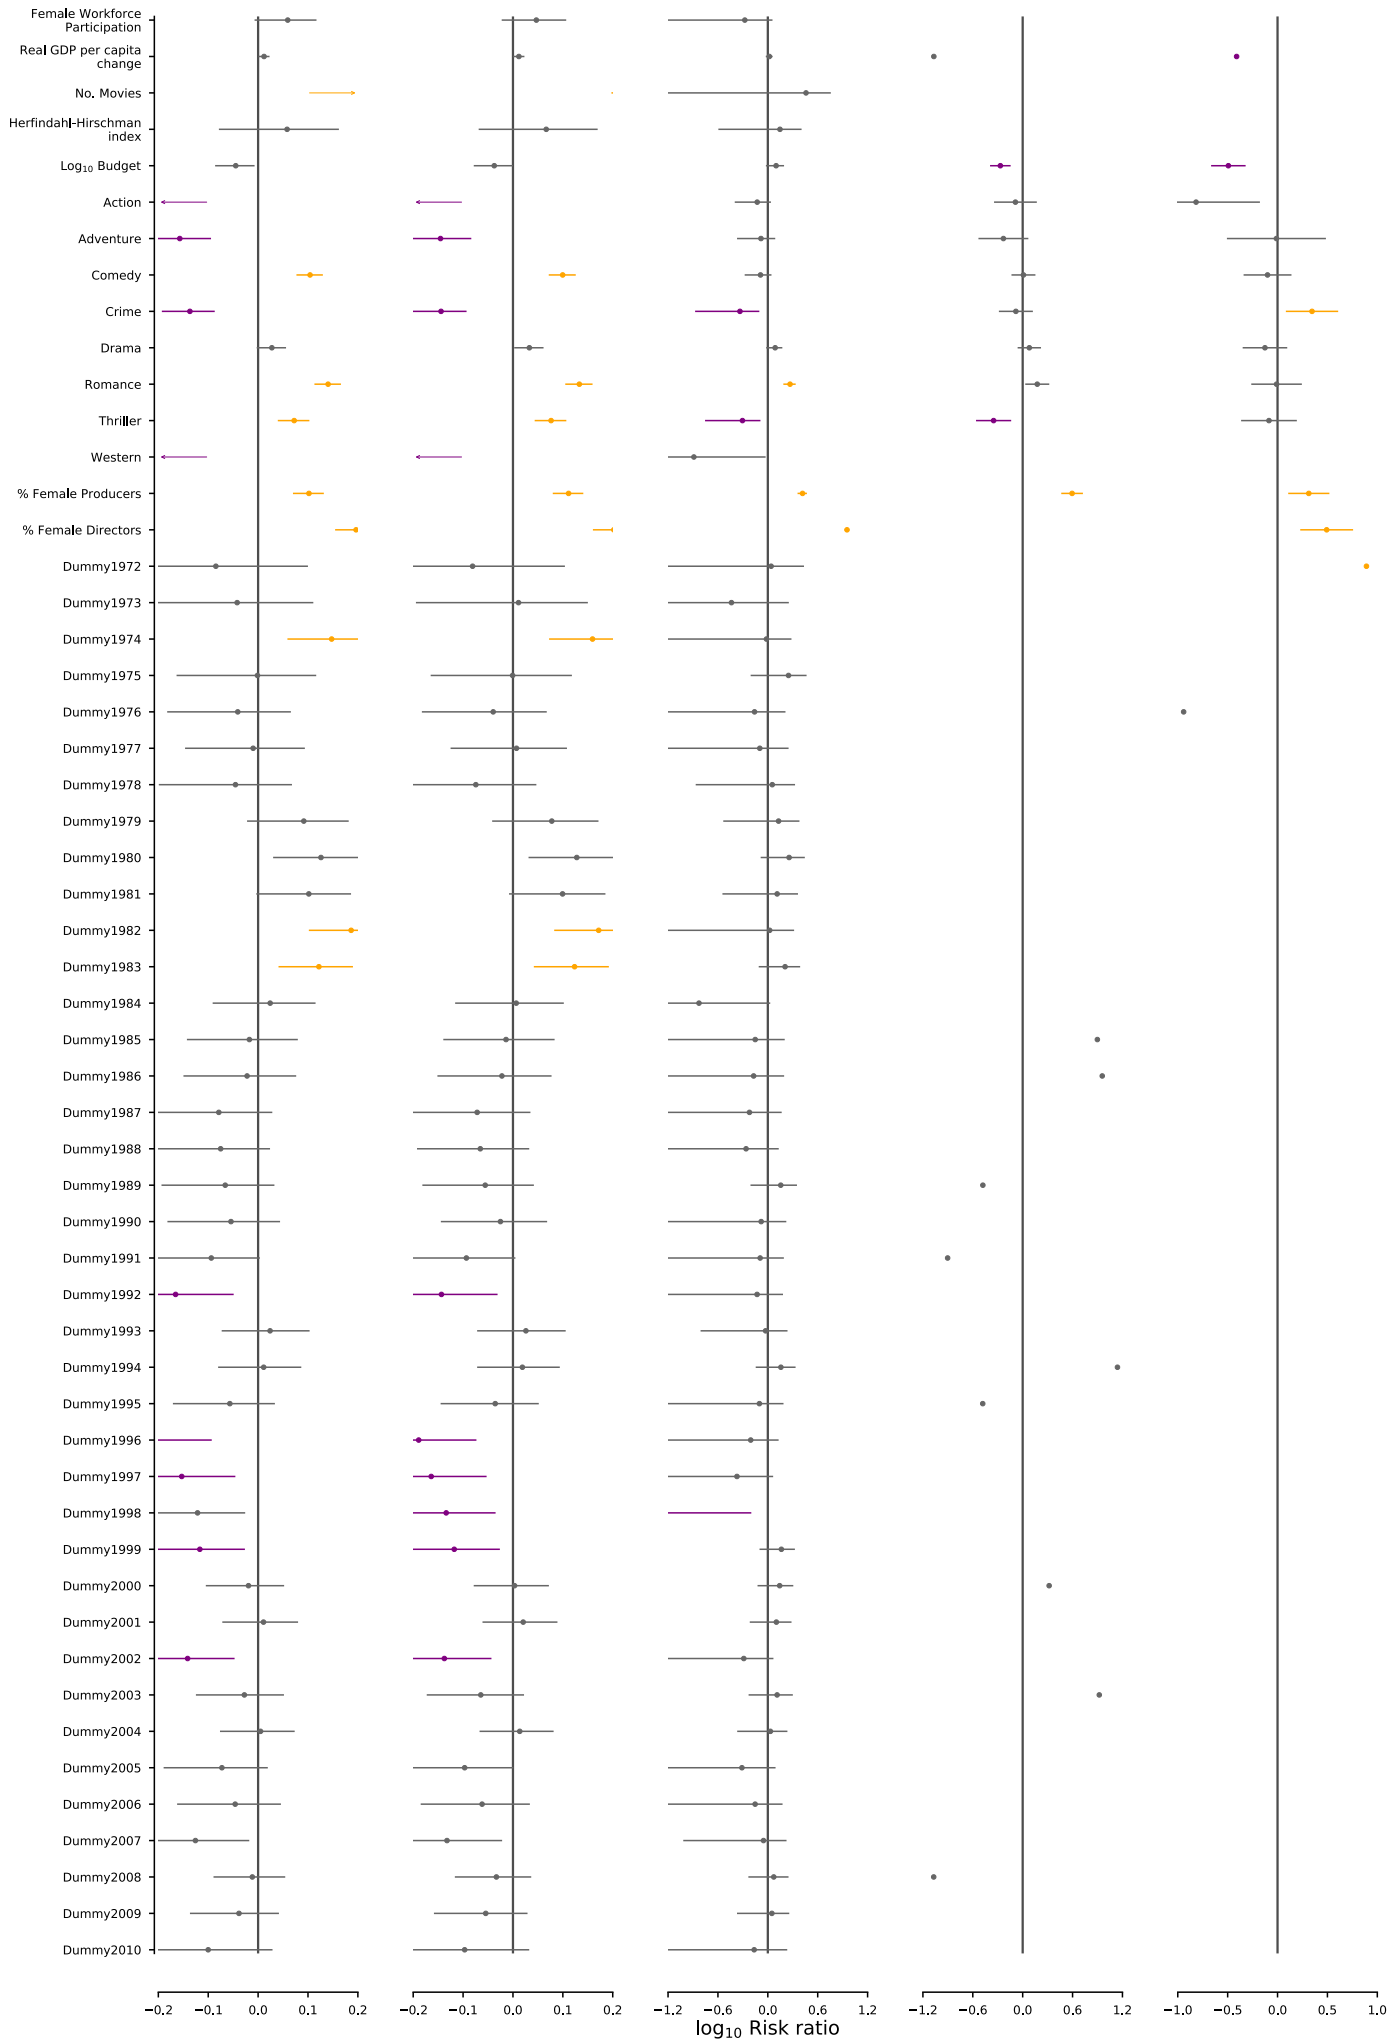

1961-2000

ACTING ALL

ACTING CREDITED

WRITING

DIRECTING

CINEMATOGRAPHY

N = 2,655, adj-R<sup>2</sup> = 0.21

N = 2,655, adj-R<sup>2</sup> = 0.20

N = 2,640, adj-R<sup>2</sup> = 0.18

N = 2,655, pseudo-R<sup>2</sup> = 0.17

N = 2,640, pseudo-R<sup>2</sup> = 0.29

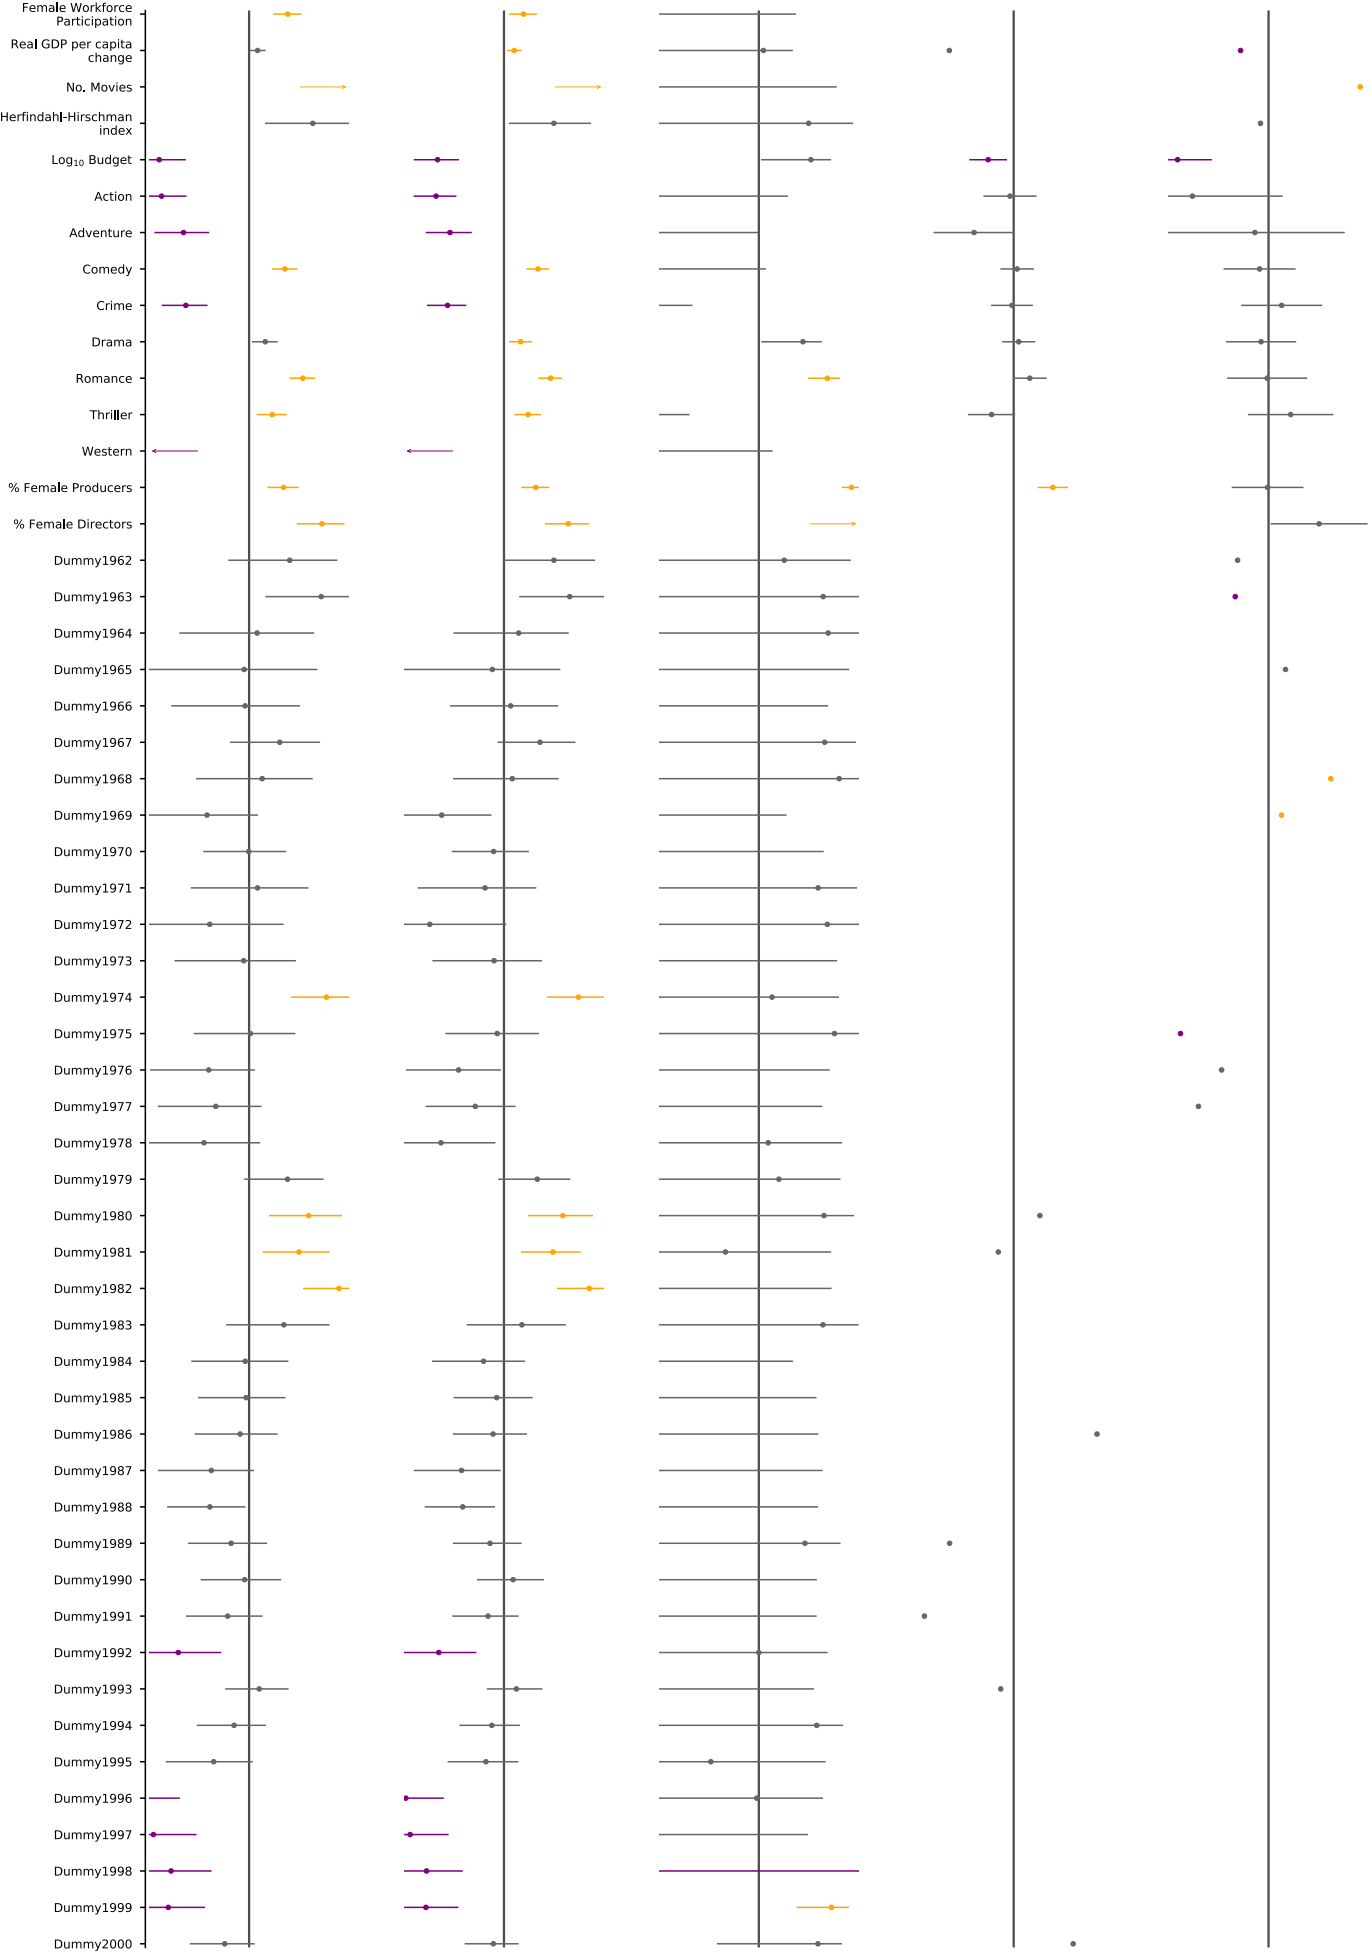

log<sub>10</sub> Risk ratio
