# Supplementary material for: Long-term patterns of gender imbalance in an industry without ability or level of interest differences
Source: PubMed Central journal article supplement (PMC7112163; doi:10.1371/journal.pone.0229662), 2020-04-01

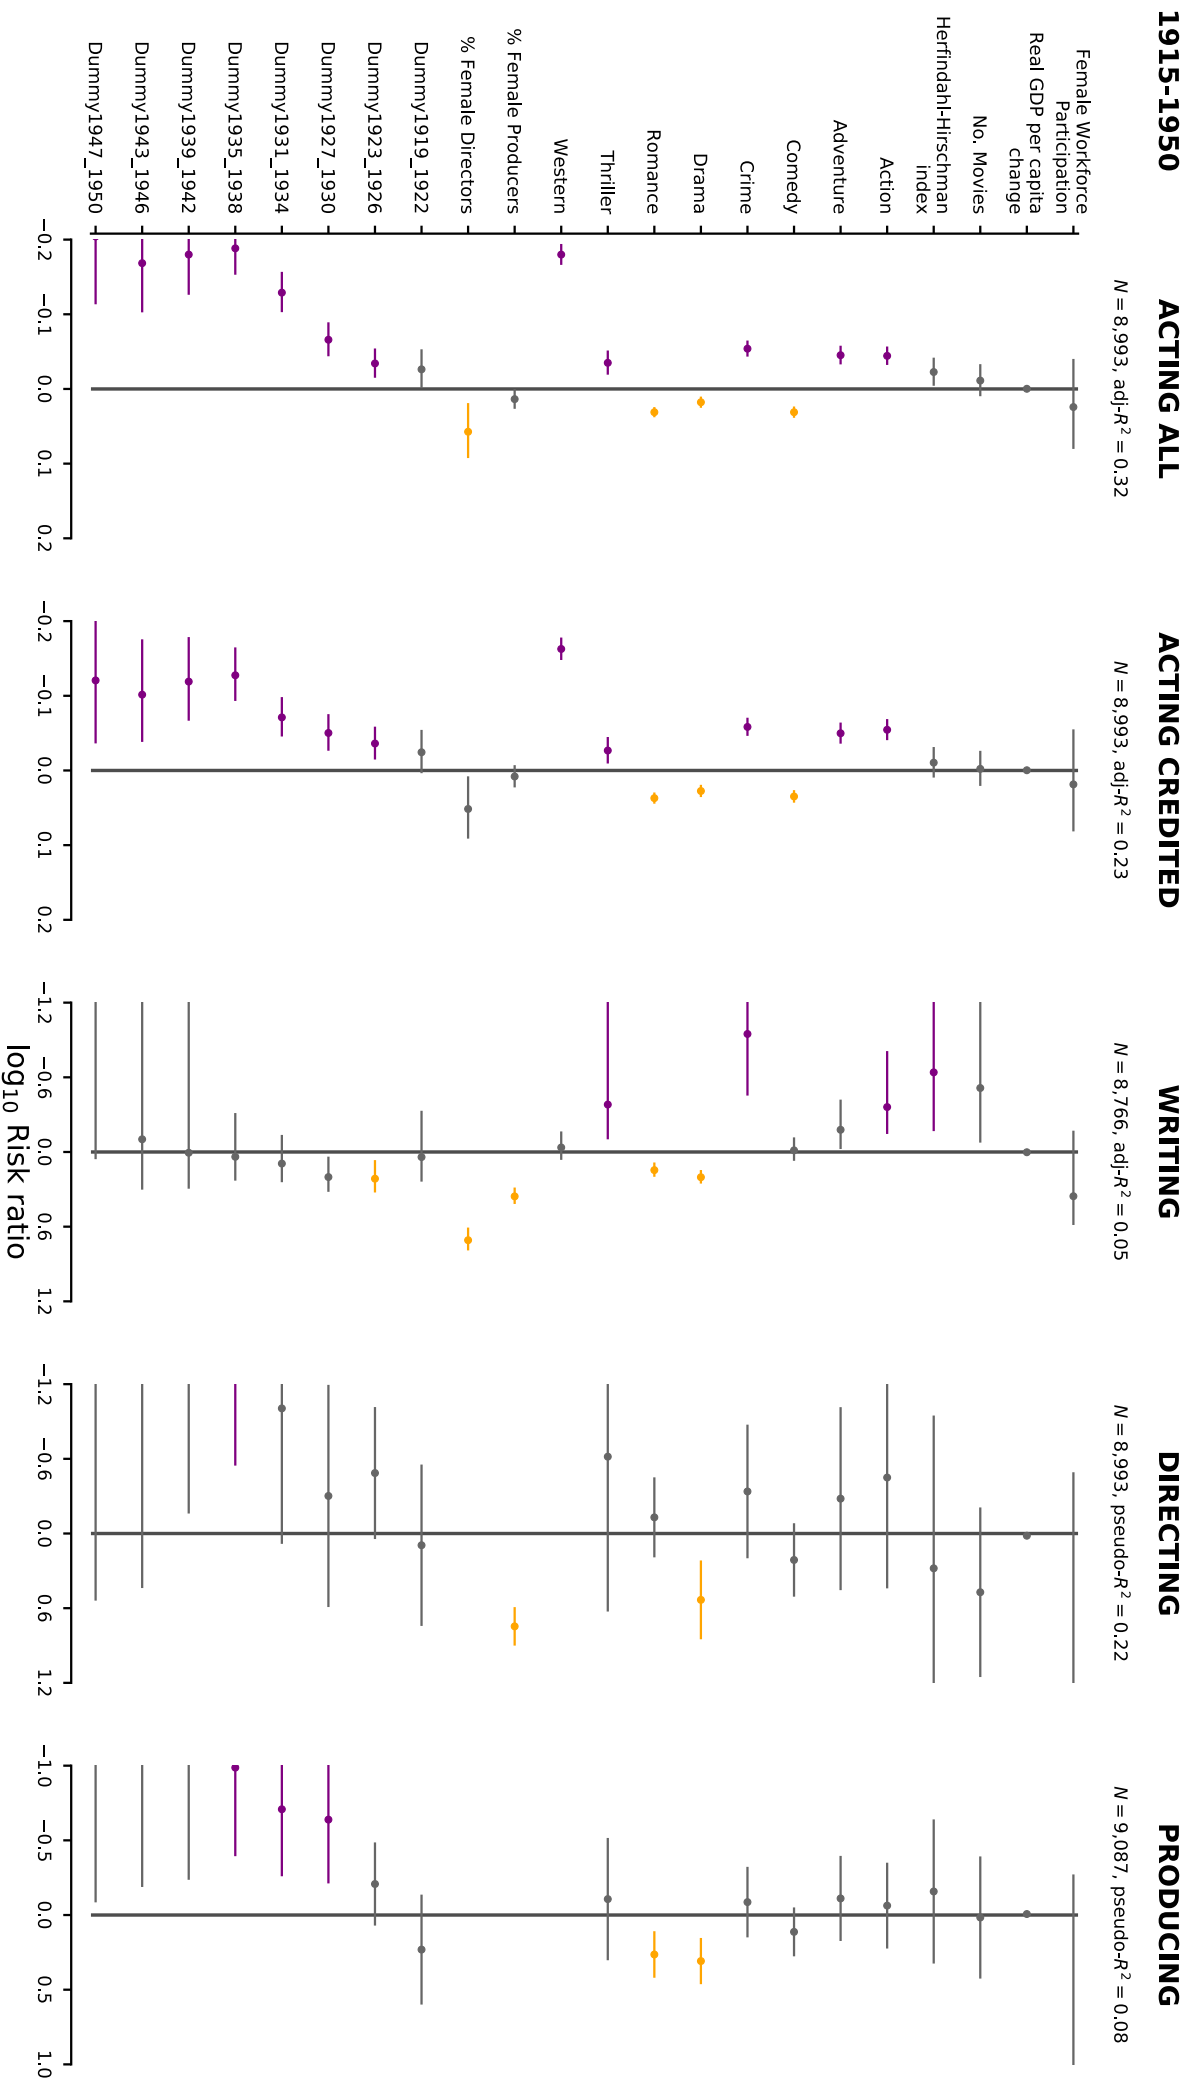

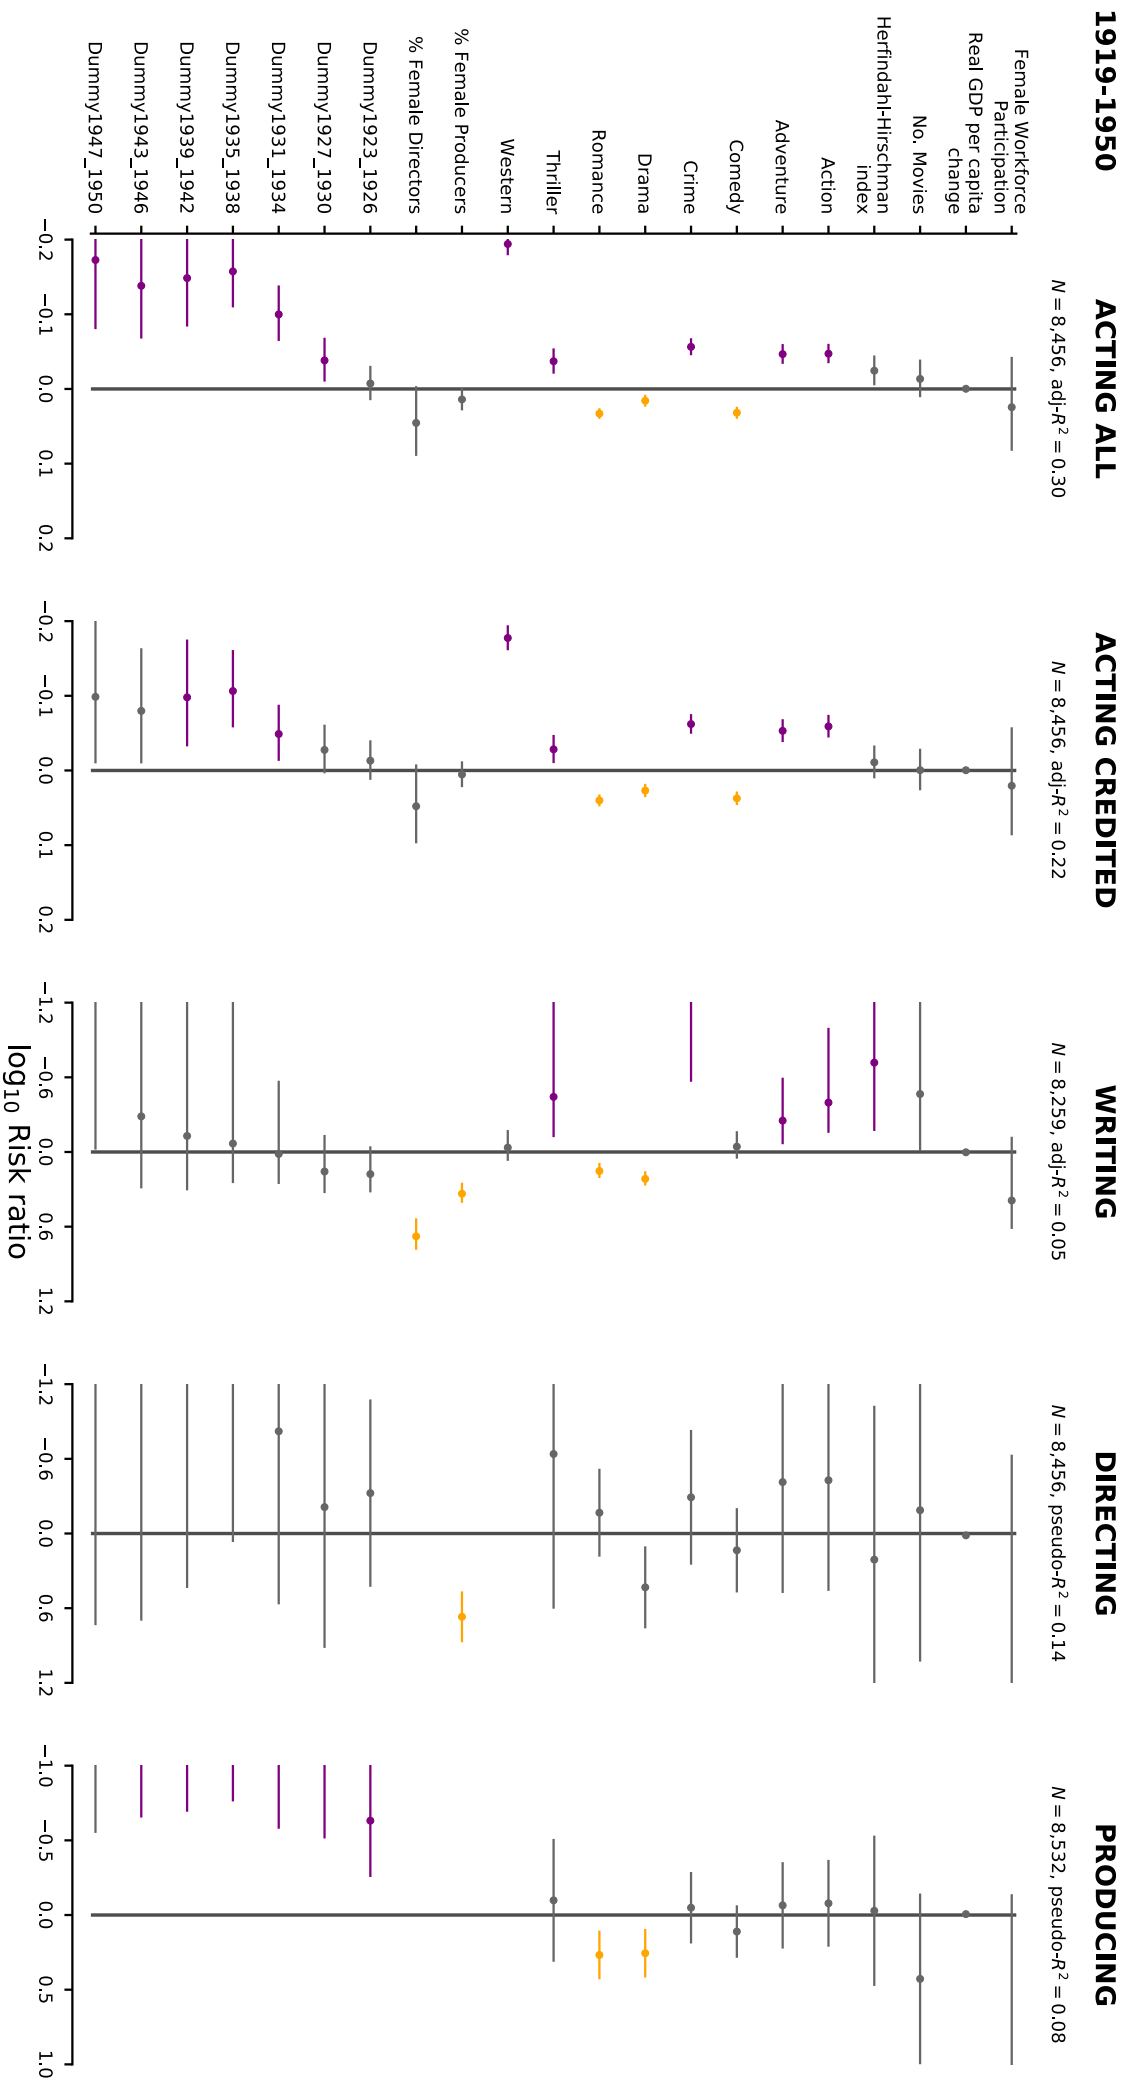

# 1927-1950

## ACTING ALL

N = 7,410, adj-R<sup>2</sup> = 0.29

## ACTING CREDITED

N = 7,410, adj-R<sup>2</sup> = 0.23

## WRITING

N = 7,345, adj-R<sup>2</sup> = 0.03

## DIRECTING

N = 7,410, pseudo-R<sup>2</sup> = 0.10

## PRODUCING

N = 7,452, pseudo-R<sup>2</sup> = -0.04

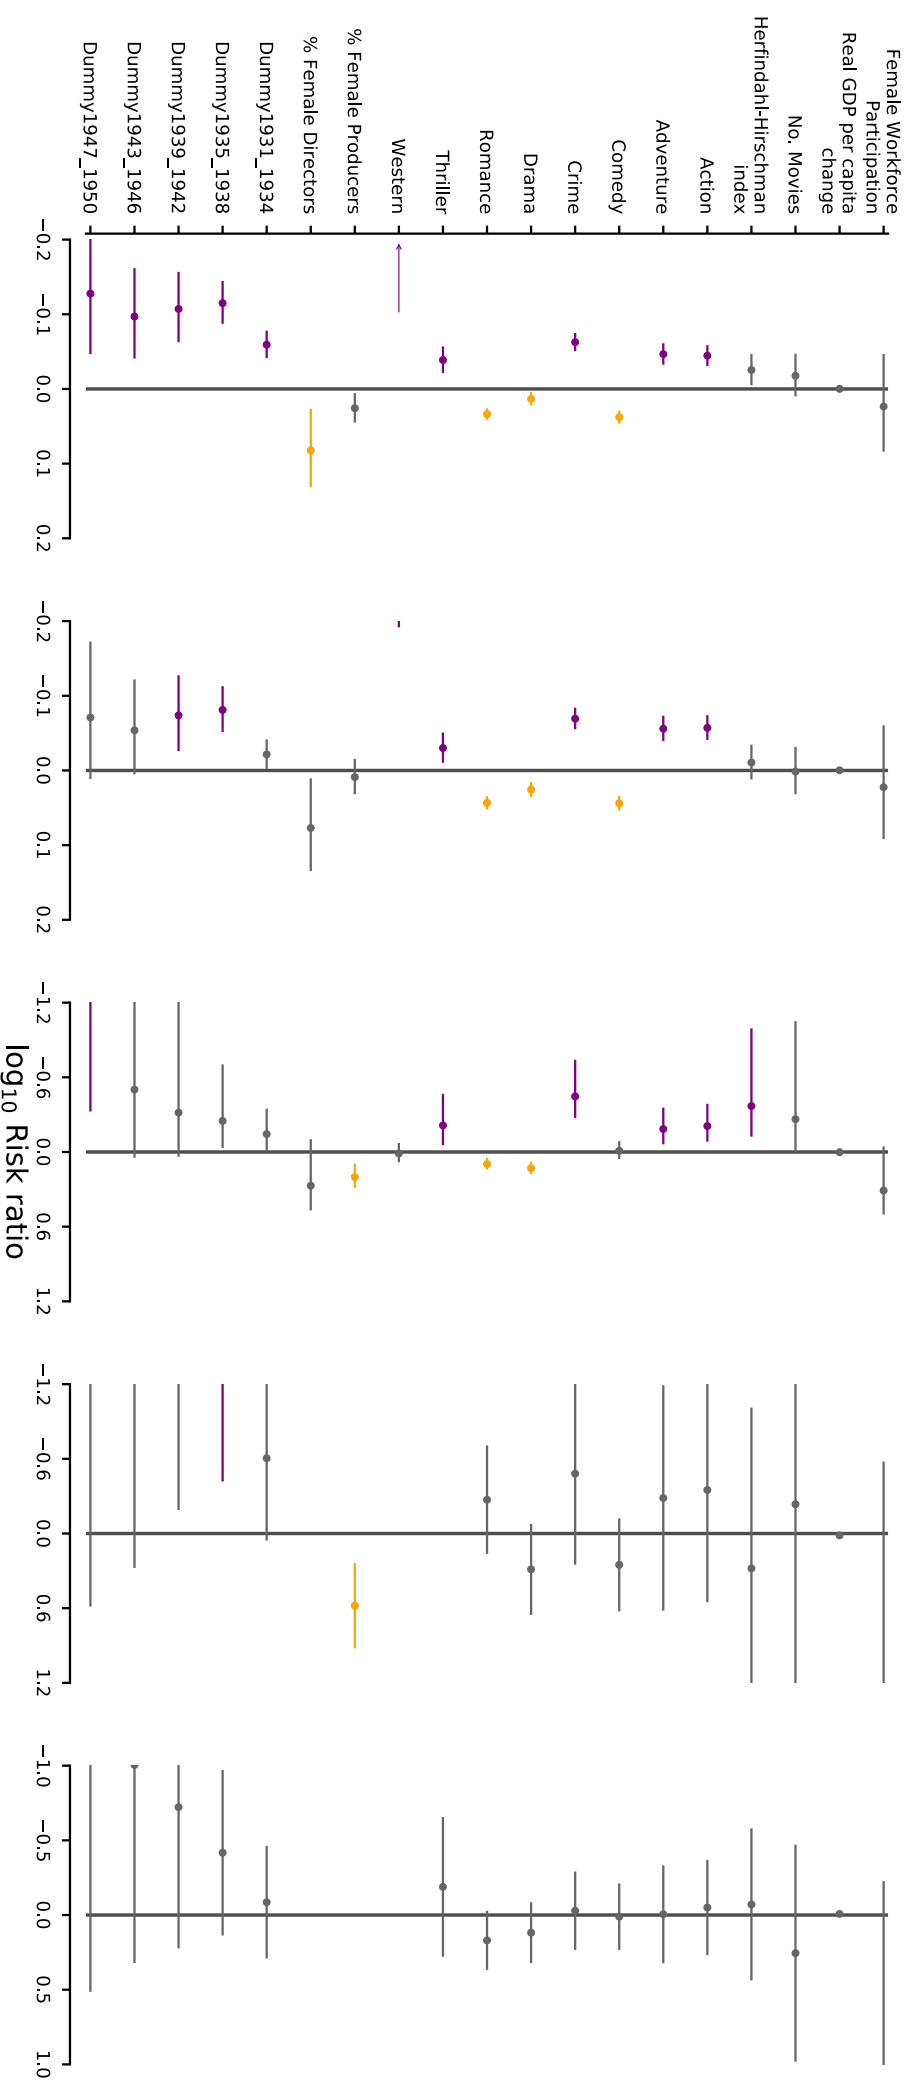

# 1919-1958

## ACTING ALL

N = 10,506, adj-R<sup>2</sup> = 0.28

## ACTING CREDITED

N = 10,506, adj-R<sup>2</sup> = 0.21

## WRITING

N = 10,302, adj-R<sup>2</sup> = 0.06

## DIRECTING

N = 10,506, pseudo-R<sup>2</sup> = 0.12

## PRODUCING

N = 10,587, pseudo-R<sup>2</sup> = 0.04

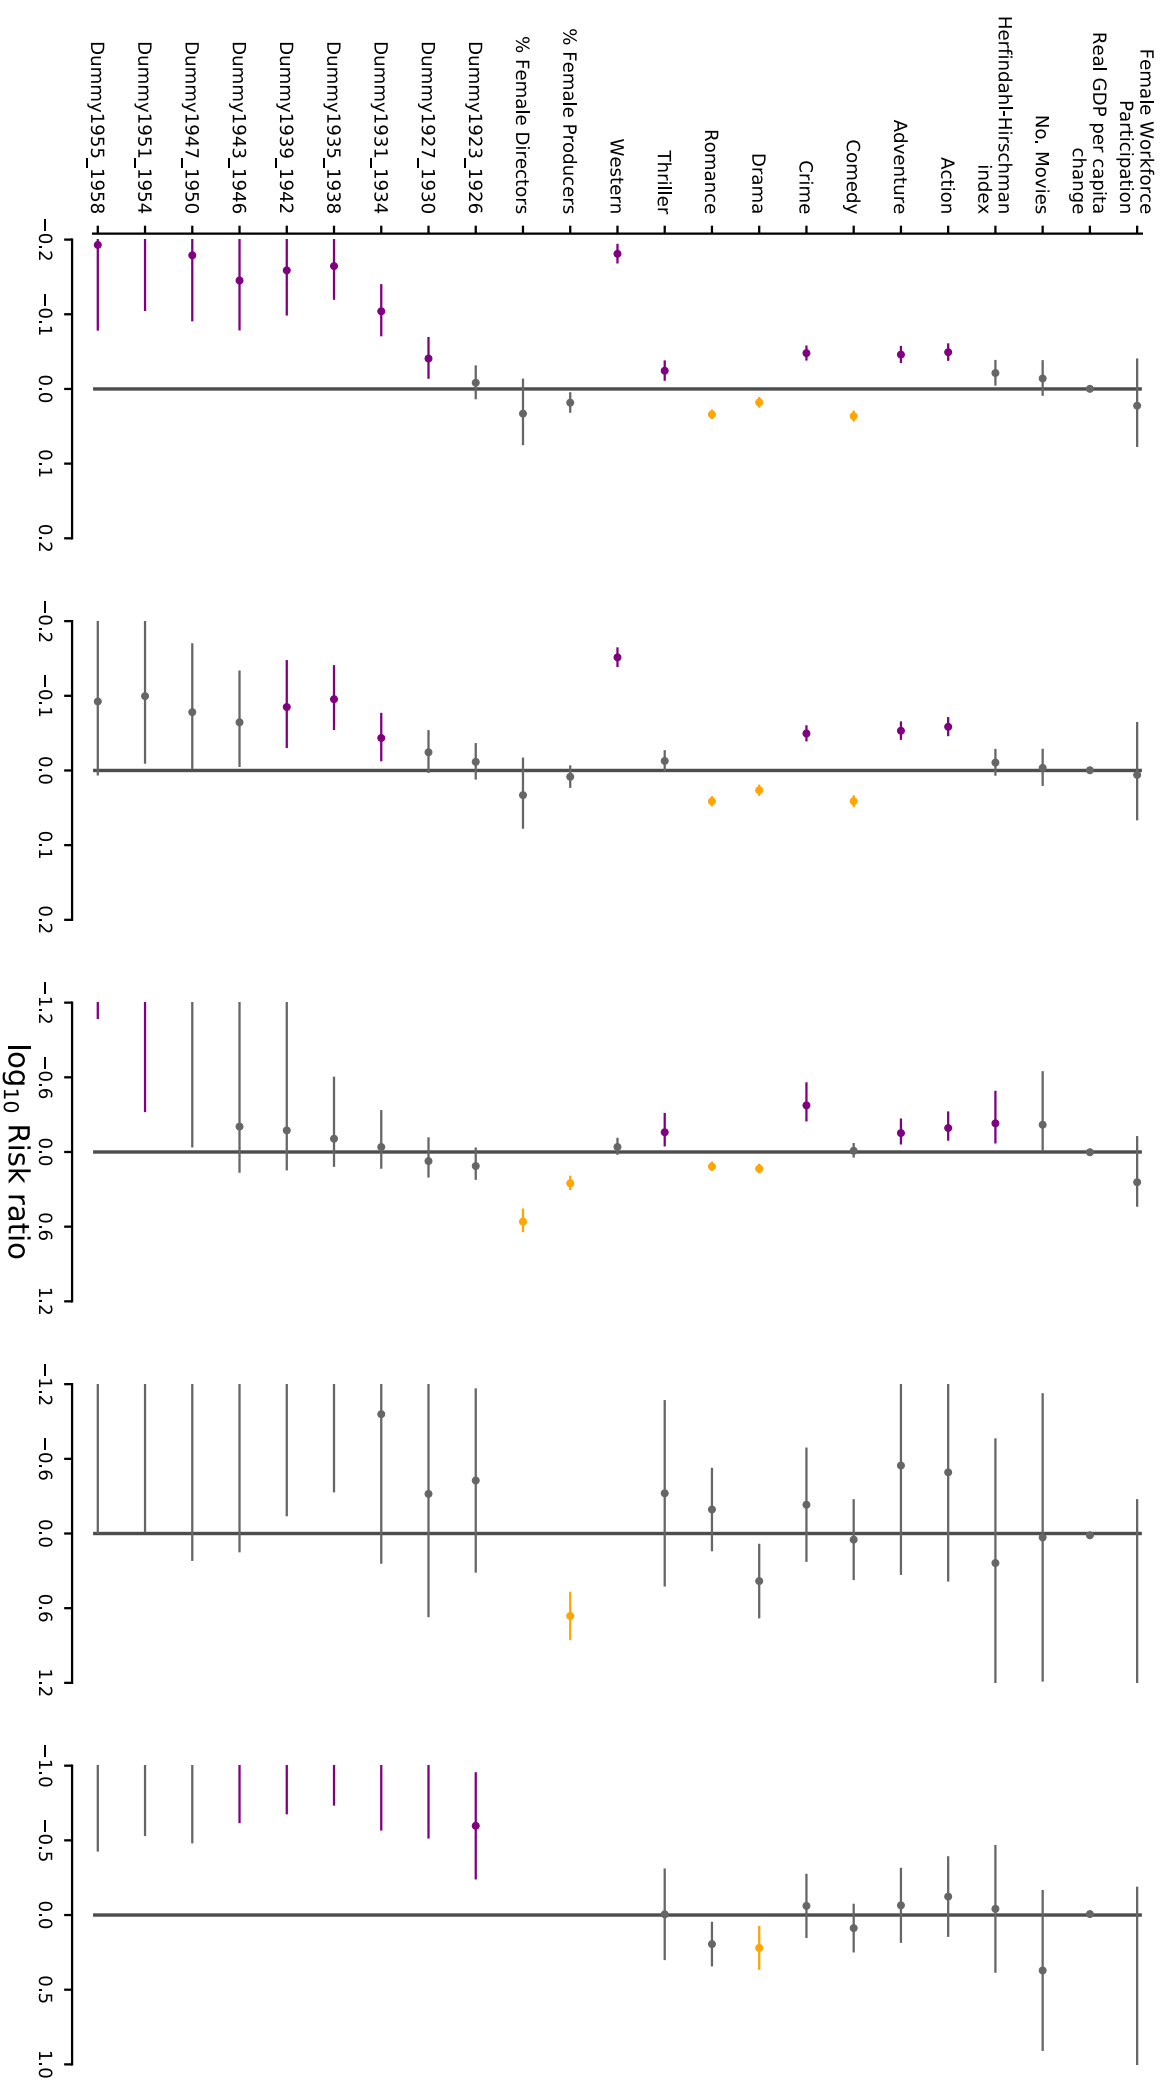

Supplement: pone.0229662.s006.pdf [file pone.0229662.s006.pdf]
