# Supplementary material for: Long-term patterns of gender imbalance in an industry without ability or level of interest differences
Source: PubMed Central journal article supplement (PMC7112163; doi:10.1371/journal.pone.0229662), 2020-04-01
Supplement: pone.0229662.s009.pdf [file pone.0229662.s009.pdf]

| AFI id     | AFI year | IMDb year | AFI title                                       | IMDb title                                      | AFI director                        | IMDb director      | IMDb id   |
|------------|----------|-----------|-------------------------------------------------|-------------------------------------------------|-------------------------------------|--------------------|-----------|
| 1746584115 | 1938     | 1938      | He Couldn't Say No                              | He Couldn't Say No                              | Seiler, Lew                         | Lewis Seiler       | tt0030220 |
| 1746577375 | 1950     | 1950      | Operation Haylift                               | Operation Haylift                               | Berke, William                      | William Berke      | tt0042811 |
| 1746585256 | 1929     | 1929      | Brothers                                        | Brothers                                        | Pembroke, Scott                     | Scott Pembroke     | tt0019732 |
| 1746491880 | 1944     | 1944      | Dead Man's Eyes                                 | Dead Man's Eyes                                 | LeBorg, Reginald                    | Reginald Le Borg   | tt0036749 |
| 1746576720 | 1932     | 1932      | The Hatchet Man                                 | The Hatchet Man                                 | Wellman, William A.                 | William A. Wellman | tt0022979 |
| 1746580531 | 1939     | 1939      | At the Circus                                   | At the Circus                                   | Buzzell, Edward                     | Edward Buzzell     | tt0031060 |
| 1746475271 | 1947     | 1947      | Heaven Only Knows                               | Heaven Only Knows                               | Rogell, Albert S.                   | Albert S. Rogell   | tt0039453 |
| 1746581852 | 1928     | 1928      | Quick Triggers                                  | Quick Triggers                                  | Taylor, Ray                         | Ray Taylor         | tt0019301 |
| 1746513091 | 1914     | 1914      | The Ragged Earl                                 | The Ragged Earl                                 | Carleton, Lloyd B.                  | Lloyd B. Carleton  | tt0004509 |
| 1746410689 | 1992     | 1992      | Reservoir Dogs                                  | Reservoir Dogs                                  | Tarantino, Quentin                  | Quentin Tarantino  | tt0105236 |
| 1746579027 | 1959     | 1959      | The Truth About Fidel Castro Revolution         | The Truth About Fidel Castro Revolution         | Flynn, Errol                        | Errol Flynn        | tt0321867 |
| 1746495762 | 1921     | 1921      | A Trip to Paradise                              | A Trip to Paradise                              | Karger, Maxwell                     | Maxwell Karger     | tt0012779 |
| 1746562312 | 1954     | 1954      | Private Hell 36                                 | Private Hell 36                                 | Siegel, Don                         | Don Siegel         | tt0047370 |
| 1746208587 | 1967     | 1967      | Hombre                                          | Hombre                                          | Ritt, Martin                        | Martin Ritt        | tt0061770 |
| 1745372631 | 2010     | 2009      | I Love You Phillip Morris                       | I Love You Phillip Morris                       | Requa, John; Ficarra, Glenn         | Glenn Ficarra      | tt1045772 |
| 1746571106 | 1935     | 1935      | Waterfront Lady                                 | Waterfront Lady                                 | Santley, Joseph                     | Joseph Santley     | tt0027184 |
| 1746420551 | 1994     | 1994      | Death Wish V: The Face of Death                 | Death Wish V: The Face of Death                 | Goldstein, Allan A.                 | Allan A. Goldstein | tt0109578 |
| 1746516004 | 1920     | 1920      | Nothing But the Truth                           | Nothing But the Truth                           | Kirkland, David                     | David Kirkland     | tt0196797 |
| 1746464910 | 1946     | 1946      | The Time, the Place and the Girl                | The Time, the Place and the Girl                | Butler, David                       | David Butler       | tt0039038 |
| 1746585227 | 1930     | 1930      | A Lady's Morals                                 | A Lady's Morals                                 | Franklin, Sidney                    | Sidney Franklin    | tt0021045 |
| 1746565494 | 1932     | 1932      | Radio Patrol                                    | Radio Patrol                                    | Cahn, Edward L.                     | Edward L. Cahn     | tt0023368 |
| 1746422653 | 1994     | 1994      | Drop Squad                                      | Drop Squad                                      | Johnson, David Clark                | David C. Johnson   | tt0109675 |
| 1746475535 | 1947     | 1946      | Winter Wonderland                               | Winter Wonderland                               | Vorhaus, Bernard                    | Bernard Vorhaus    | tt0039997 |
| 1746578576 | 1960     | 1960      | The Bellboy                                     | The Bellboy                                     | Lewis, Jerry                        | Jerry Lewis        | tt0053644 |
| 1746562340 | 1955     | 1955      | The King's Thief                                | The King's Thief                                | Leonard, Robert Z.; Fregonese, Hugo | Robert Z. Leonard  | tt0048259 |
| 1746438960 | 1941     | 1941      | Wrangler's Roost                                | Wrangler's Roost                                | Luby, S. Roy                        | S. Roy Luby        | tt0034403 |
| 1746580996 | 1961     | 1961      | The Fiercest Heart                              | The Fiercest Heart                              | Sherman, George                     | George Sherman     | tt0054874 |
| 1746583533 | 1931     | 1931      | Frankenstein                                    | Frankenstein                                    | Whale, James                        | James Whale        | tt0021884 |
| 1746583381 | 1929     | 1929      | Behind That Curtain                             | Behind That Curtain                             | Cummings, Irving                    | Irving Cummings    | tt0019684 |
| 1746475522 | 1948     | 1948      | Road House                                      | Road House                                      | Negulesco, Jean                     | Jean Negulesco     | tt0040740 |
| 1746523385 | 1915     | 1915      | Hearts and the Highway                          | Hearts and the Highway                          | North, Wilfred                      | Wilfrid North      | tt0005459 |
| 1746422968 | 1996     | 1996      | Dunston Checks In                               | Dunston Checks In                               | Kwapis, Ken                         | Ken Kwapis         | tt0116151 |
| 1746580906 | 1939     | 1939      | Tower of London                                 | Tower of London                                 | Lee, Rowland V.                     | Rowland V. Lee     | tt0032049 |
| 1746500654 | 1925     | 1925      | American Pluck                                  | American Pluck                                  | Stanton, Richard                    | Richard Stanton    | tt0015570 |
| 1746491837 | 1948     | 1948      | Miss Tatlock's Millions                         | Miss Tatlock's Millions                         | Haydn, Richard                      | Richard Haydn      | tt0040599 |
| 1746422944 | 1994     | 1994      | Wyatt Earp                                      | Wyatt Earp                                      | Kasdan, Lawrence                    | Lawrence Kasdan    | tt0111756 |
| 1746208547 | 1968     | 1968      | The One and Only, Genuine, Original Family Band | The One and Only, Genuine, Original Family Band | O'Herlihy, Michael                  | Michael O'Herlihy  | tt0063389 |
| 1746514994 | 1913     | 1913      | Moths                                           | Moths                                           |                                     | Lawrence Marston   | tt0003171 |
| 1746582552 | 1936     | 1936      | Silverspurs                                     | Silver Spurs                                    | Taylor, Ray                         | Ray Taylor         | tt0028251 |
| 1746569619 | 1958     | 1958      | Cry Terror!                                     | Cry Terror!                                     | Stone, Andrew L.                    | Andrew L. Stone    | tt0051501 |
| 1746422947 | 1994     | 1994      | Crooklyn                                        | Crooklyn                                        | Lee, Spike                          | Spike Lee          | tt0109504 |
| 1746562402 | 1953     | 1953      | 99 River Street                                 | 99 River Street                                 | Karlson, Phil                       | Phil Karlson       | tt0045465 |
| 1745341993 | 2004     | 2004      | Paparazzi                                       | Paparazzi                                       | Abascal, Paul                       | Paul Abascal       | tt0338325 |
| 1746420857 | 1990     | 1990      | Madhouse                                        | Madhouse                                        | Ropelewski, Tom                     | Tom Ropelewski     | tt0100087 |
| 1746474513 | 1946     | 1946      | The Thrill of Brazil                            | The Thrill of Brazil                            | Simon, S. Sylvan                    | S. Sylvan Simon    | tt0039032 |
| 1746561838 | 1956     | 1955      | The Court Jester                                | The Court Jester                                | Panama, Norman; Frank, Melvin       | Melvin Frank       | tt0049096 |
| 1746198737 | 1968     | 1968      | With Six You Get Eggröll                        | With Six You Get Eggröll                        | Morris, Howard                      | Howard Morris      | tt0063821 |
| 1746566171 | 1953     | 1953      | Sweethearts on Parade                           | Sweethearts on Parade                           | Dwan, Allan                         | Allan Dwan         | tt0046386 |
| 1746513623 | 1916     | 1916      | The Trail of the Lonesome Pine                  | The Trail of the Lonesome Pine                  | DeMille, Cecil B.                   | Cecil B. DeMille   | tt0007473 |
| 1746555297 | 1957     | 1957      | Cyclops                                         | The Cyclops                                     | Gordon, Bert I.                     | Bert I. Gordon     | tt0050281 |
| 1746511813 | 1916     | 1916      | A Law unto Himself                              | A Law Unto Himself                              | Broadwell, Robert                   | Robert Broadwell   | tt0163049 |
| 1746509321 | 1949     | 1949      | Gun Law Justice                                 | Gun Law Justice                                 | Hillyer, Lambert                    | Lambert Hillyer    | tt0041439 |
| 1746435346 | 1999     | 1999      | Cradle Will Rock                                | Cradle Will Rock                                | Robbins, Tim                        | Tim Robbins        | tt0150216 |
| 1746500620 | 1926     | 1926      | The Border Sheriff                              | The Border Sheriff                              | Bradbury, Robert North              | Robert N. Bradbury | tt0016673 |
| 1746473777 | 1942     | 1942      | True to the Army                                | True to the Army                                | Rogell, Albert S.                   | Albert S. Rogell   | tt0035474 |
| 1746464949 | 1946     | 1946      | Wife Wanted                                     | Wife Wanted                                     | Karlson, Phil                       | Phil Karlson       | tt0039105 |

|            |      |      |                                |                                |                                  |                                     |            |
|------------|------|------|--------------------------------|--------------------------------|----------------------------------|-------------------------------------|------------|
| 1746585388 | 1939 | 1939 | Confessions of a Nazi Spy      | Confessions of a Nazi Spy      | Litvak, Anatole                  | Anatole Litvak                      | tt0031173  |
| 1746512148 | 1927 | 1927 | The Girl from Chicago          | The Girl from Chicago          | Enright, Ray                     | Ray Enright                         | tt0017934  |
| 1746578621 | 1950 | 1950 | The Secret Fury                | The Secret Fury                | Ferrer, Mel                      | Mel Ferrer                          | tt0042935  |
| 1769971933 | 1969 | 1969 | The Pleasure Machines          | The Pleasure Machines          | Garcia, Ron                      | Ronald Víctor García                | tt0134032  |
| 1746217618 | 1966 | 1966 | The Ugly Dachshund             | The Ugly Dachshund             | Tokar, Norman                    | Norman Tokar                        | tt0061135  |
| 1746574679 | 1936 | 1936 | Postal Inspector               | Postal Inspector               | Brower, Otto                     | Otto Brower                         | tt0028132  |
| 1746580703 | 1937 | 1937 | Courage of the West            | Courage of the West            | Lewis, Joseph H.                 | Joseph H. Lewis                     | tt0028746  |
| 1746454259 | 1941 | 1941 | Three Girls About Town         | Three Girls About Town         | Jason, Leigh                     | Leigh Jason                         | tt0034286  |
| 1746560758 | 1932 | 1932 | Hello Trouble                  | Hello Trouble                  | Hillyer, Lambert                 | Lambert Hillyer                     | tt0022992  |
| 1746421716 | 1996 | 1996 | The Great White Hype           | The Great White Hype           | Hudlin, Reginald                 | Reginald Hudlin                     | tt0116448  |
| 1746566082 | 1956 | 1956 | Tribute to a Bad Man           | Tribute to a Bad Man           | Wise, Robert                     | Robert Wise                         | tt0049881  |
| 1745358540 | 2003 | 2002 | Phone Booth                    | Phone Booth                    | Schumacher, Joel                 | Joel Schumacher                     | tt0183649  |
| 1746420403 | 1987 | 1987 | Surf Nazis Must Die            | Surf Nazis Must Die            | George, Peter                    | Peter George                        | tt0094077  |
| 1746585405 | 1940 | 1940 | Blondie Plays Cupid            | Blondie Plays Cupid            | Strayer, Frank R.                | Frank R. Strayer                    | tt0032262  |
| 1746491748 | 1944 | 1944 | Boss of Boomtown               | Boss of Boomtown               | Taylor, Ray                      | Ray Taylor                          | tt0036663  |
| 1746454675 | 1941 | 1941 | It Started with Eve            | It Started with Eve            | Koster, Henry                    | Henry Koster                        | tt0033766  |
| 1746520712 | 1925 | 1925 | The Danger Signal              | The Danger Signal              | Kenton, Erle C.                  | Erle C. Kenton                      | tt0015728  |
| 1745282897 | 2006 | 2006 | Little Miss Sunshine           | Little Miss Sunshine           | Dayton, Jonathan; Faris, Valerie | Jonathan Dayton                     | tt0449059  |
| 1746584721 | 1930 | 1930 | Worldly Goods                  | Worldly Goods                  | Rosen, Phil                      | Phil Rosen                          | tt0021563  |
| 1746566091 | 1955 | 1955 | The Purple Mask                | The Purple Mask                | Humberstone, Bruce               | H. Bruce Humberstone                | tt0048522  |
| 1746208588 | 1967 | 1967 | Teenage Mother                 | Teenage Mother                 | Gross, Jerry                     | Jerry Gross                         | tt0061071  |
| 1746436581 | 1942 | 1942 | Lady for a Night               | Lady for a Night               | Jason, Leigh                     | Leigh Jason                         | tt0033806  |
| 1746421232 | 1982 | 1982 | Summer Lovers                  | Summer Lovers                  | Kleiser, Randal                  | Randal Kleiser                      | tt0084737  |
| 1746421239 | 1993 | 1993 | Josh and S.A.M.                | Josh and S.A.M.                | Weber, Billy                     | Billy Weber                         | tt0107277  |
| 1746565072 | 1952 | 1952 | Park Row                       | Park Row                       | Fuller, Samuel                   | Samuel Fuller                       | tt0045009  |
| 1746492073 | 1948 | 1948 | The Prince of Thieves          | The Prince of Thieves          | Bretherton, Howard; Nosseck, Max | Howard Bretherton                   | tt0040710  |
| 1769972677 | 1963 | 1963 | All of Me                      | All of Me                      | Martin, Jay                      | Joel Holt                           | tt00445173 |
| 1746475259 | 1944 | 1944 | Goodnight, Sweetheart          | Goodnight, Sweetheart          | Santley, Joseph                  | Joseph Santley                      | tt0036875  |
| 1746491798 | 1948 | 1948 | Sorry, Wrong Number            | Sorry, Wrong Number            | Litvak, Anatole                  | Anatole Litvak                      | tt0040823  |
| 1746454063 | 1941 | 1941 | Three Sons O'Guns              | Three Sons o' Guns             | Stoloff, Ben                     | Benjamin Stoloff                    | tt0034287  |
| 1746502064 | 1916 | 1916 | The Honorable Friend           | The Honorable Friend           | Le Saint, Edward J.              | Edward LeSaint                      | tt0006825  |
| 1746524845 | 1923 | 1923 | The Bad Man                    | The Bad Man                    | Carewe, Edwin                    | Edwin Carewe                        | tt0013856  |
| 1746576017 | 1931 | 1931 | Law of the Sea                 | The Law of the Sea             | Brower, Otto                     | Otto Brower                         | tt0023123  |
| 1746501041 | 1910 | 1910 | Patricia of the Plains         | Patricia of the Plains         |                                  | Gilbert M. 'Broncho Billy' Anderson | tt0001357  |
| 1746509198 | 1925 | 1925 | Wild Justice                   | Wild Justice                   | Franklin, Chester                | Chester M. Franklin                 | tt0016535  |
| 1746235044 | 1972 | 1972 | Slaughter                      | Slaughter                      | Starrett, Jack                   | Jack Starrett                       | tt0069279  |
| 1746499870 | 1950 | 1950 | The Blazing Sun                | The Blazing Sun                | English, John                    | John English                        | tt0042260  |
| 1746580285 | 1938 | 1938 | Mr. Moto Takes a Chance        | Mr. Moto Takes a Chance        | Foster, Norman                   | Norman Foster                       | tt0030469  |
| 1746577961 | 1935 | 1935 | What Price Crime?              | What Price Crime               | Herman, Albert                   | Albert Herman                       | tt0027201  |
| 1746495801 | 1920 | 1921 | The Rich Slave                 | The Rich Slave                 | Fielding, Romaine                | Romaine Fielding                    | tt0152187  |
| 1746501628 | 1915 | 1915 | The Scarlet Sin                | The Scarlet Sin                | Turner, Otis                     | Otis Turner                         | tt0006010  |
| 1746394009 | 1981 | 1981 | Shock Treatment                | Shock Treatment                | Sharman, Jim                     | Jim Sharman                         | tt0083067  |
| 1746508877 | 1926 | 1926 | The Truthful Sex               | The Truthful Sex               | Thomas, Richard                  | Richard Thomas                      | tt0017489  |
| 1746582331 | 1930 | 1930 | A Soldier's Plaything          | A Soldier's Plaything          | Curtiz, Michael                  | Michael Curtiz                      | tt0022409  |
| 1746569677 | 1953 | 1953 | Texas Bad Man                  | Texas Bad Man                  | Collins, Lewis D.                | Lewis D. Collins                    | tt0162004  |
| 1745374774 | 2009 | 2008 | The Informers                  | The Informers                  | Jordan, Gregor                   | Gregor Jordan                       | tt0865554  |
| 1746520912 | 1948 | 1948 | Parole, Inc.                   | Parole, Inc.                   | Zeisler, Alfred                  | Alfred Zeisler                      | tt0041733  |
| 1746503554 | 1921 | 1921 | The Sea Lion                   | The Sea Lion                   | Lee, Rowland V.                  | Rowland V. Lee                      | tt0012657  |
| 1745302645 | 2006 | 2006 | Wicked Little Things           | Wicked Little Things           | Cardone, J. S.                   | J. S. Cardone                       | tt0470000  |
| 1746533002 | 1923 | 1923 | Sixty Cents an Hour            | Sixty Cents an Hour            | Henabery, Joseph                 | Joseph Henabery                     | tt0014480  |
| 1746575783 | 1931 | 1931 | The Painted Desert             | The Painted Desert             | Higgin, Howard                   | Howard Higgin                       | tt0022243  |
| 1746567265 | 1933 | 1933 | Rafter Romance                 | Rafter Romance                 | Seiter, William                  | William A. Seiter                   | tt0024484  |
| 1746565938 | 1957 | 1957 | Lizzie                         | Lizzie                         | Haas, Hugo                       | Hugo Haas                           | tt0050650  |
| 1746577906 | 1937 | 1937 | Maid of Salem                  | Maid of Salem                  | Lloyd, Frank                     | Frank Lloyd                         | tt0029190  |
| 1746502713 | 1910 | 1910 | The Long Trail                 | The Long Trail                 | Boggs, Frank                     | Francis Boggs                       | tt0001290  |
| 1746500818 | 1914 | 1914 | The Redemption of David Corson | The Redemption of David Corson |                                  | Frederick A. Thomson                | tt0004522  |
| 1746578669 | 1960 | 1960 | Hideout in the Sun             | Hideout in the Sun             | Wolk, Lazarus L.                 | Larry Wolk                          | tt0053908  |

|            |      |      |                                             |                                             |                                |                      |           |
|------------|------|------|---------------------------------------------|---------------------------------------------|--------------------------------|----------------------|-----------|
| 1746532616 | 1923 | 1923 | Sawdust                                     | Sawdust                                     | Conway, Jack                   | Jack Conway          | tt0014439 |
| 1746574778 | 1936 | 1936 | Lady from Nowhere                           | Lady from Nowhere                           | Wiles, Gordon                  | Gordon Wiles         | tt0027864 |
| 1746574528 | 1933 | 1933 | Blind Adventure                             | Blind Adventure                             | Schoedsack, Ernest B.          | Ernest B. Schoedsack | tt0023816 |
| 1746453621 | 1944 | 1944 | Oath of Vengeance                           | Oath of Vengeance                           | Newfield, Sam                  | Sam Newfield         | tt0037142 |
| 1745373934 | 2009 | 2009 | He's Just Not That Into You                 | He's Just Not That Into You                 | Kwapis, Ken                    | Ken Kwapis           | tt1001508 |
| 1746570070 | 1952 | 1952 | Washington Story                            | Washington Story                            | Pirosh, Robert                 | Robert Pirosh        | tt0045312 |
| 2007986729 | 1922 | 1922 | Bow Wow                                     | Bow Wow                                     | Jackman, Fred W.               | Fred Jackman         | tt0123000 |
| 1746577754 | 1936 | 1936 | A Message to Garcia                         | A Message to Garcia                         | Marshall, George               | George Marshall      | tt0027959 |
| 1746564466 | 1952 | 1952 | The Marrying Kind                           | The Marrying Kind                           | Cukor, George                  | George Cukor         | tt0044888 |
| 1746584418 | 1940 | 1940 | The Crooked Road                            | The Crooked Road                            | Rosen, Philip                  | Phil Rosen           | tt0032367 |
| 1746474524 | 1947 | 1947 | Crossfire                                   | Crossfire                                   | Dmytryk, Edward                | Edward Dmytryk       | tt0039286 |
| 1746219421 | 1971 | 1970 | The Animals                                 | The Animals                                 | Joy, Ron                       | Ron Joy              | tt0065407 |
| 1746524632 | 1910 | 1910 | Love's "C.Q.D."                             | Love's C. Q. D.                             |                                | William F. Haddock   | tt0001294 |
| 1746570569 | 1933 | 1933 | The Narrow Corner                           | The Narrow Corner                           | Green, Alfred E.               | Alfred E. Green      | tt0024373 |
| 1746184863 | 1965 | 1965 | The Naked Brigade                           | The Naked Brigade                           | Dexter, Maury                  | Maury Dexter         | tt0059494 |
| 1746583685 | 1951 | 1951 | The Man with My Face                        | The Man with My Face                        | Montagne, Edward J.            | Edward Montagne      | tt0121515 |
| 1746561268 | 1932 | 1932 | Panama Flo                                  | Panama Flo                                  | Murphy, Ralph                  | Ralph Murphy         | tt0023316 |
| 1746583033 | 1936 | 1936 | Hopalong Cassidy Returns                    | Hopalong Cassidy Returns                    | Watt, Nate                     | Nate Watt            | tt0027760 |
| 1746487732 | 1918 | 1918 | Beans                                       | Beans                                       | Dillon, Jack                   | John Francis Dillon  | tt0008865 |
| 1746577351 | 1963 | 1963 | Passion Holiday                             | Passion Holiday                             | Miles, Wynn                    | Wynn Mavis           | tt0056334 |
| 1746500933 | 1915 | 1915 | Betty in Search of a Thrill                 | Betty in Search of a Thrill                 | Smalley, Phillips; Weber, Lois | Phillips Smalley     | tt0004961 |
| 1746580352 | 1938 | 1938 | Durango Valley Raiders                      | Durango Valley Raiders                      | Newfield, Sam                  | Sam Newfield         | tt0030091 |
| 1745358676 | 2009 | 2008 | The Hurt Locker                             | The Hurt Locker                             | Bigelow, Kathryn               | Kathryn Bigelow      | tt0887912 |
| 1746555037 | 1957 | 1957 | Death in Small Doses                        | Death in Small Doses                        | Newman, Joseph                 | Joseph M. Newman     | tt0050295 |
| 1746580458 | 1939 | 1939 | The Rookie Cop                              | The Rookie Cop                              | Howard, David                  | David Howard         | tt0031875 |
| 1746465177 | 1941 | 1941 | Billy the Kid's Range War                   | Billy the Kid's Range War                   | Stewart, Peter                 | Sam Newfield         | tt0033394 |
| 1746501664 | 1916 | 1916 | Nearly a King                               | Nearly a King                               | Thomson, Frederick             | Frederick A. Thomson | tt0007118 |
| 1746574563 | 1933 | 1933 | By Appointment Only                         | By Appointment Only                         | Strayer, Frank R.              | Frank R. Strayer     | tt0023859 |
| 1746577610 | 1934 | 1934 | Murder in the Private Car                   | Murder in the Private Car                   | Beaumont, Harry                | Harry Beaumont       | tt0024359 |
| 1746185394 | 1965 | 1965 | Nudes on Tiger Reef                         | Nudes on Tiger Reef                         | Mahon, Barry                   | Barry Mahon          | tt0134858 |
| 1746509295 | 1949 | 1949 | Riders in the Sky                           | Riders in the Sky                           | English, John                  | John English         | tt0041807 |
| 1746410442 | 1987 | 1987 | Wall Street                                 | Wall Street                                 | Stone, Oliver                  | Oliver Stone         | tt0094291 |
| 1746513654 | 1923 | 1923 | The Old Fool                                | The Old Fool                                | Venturini, Edward              | Edward D. Venturini  | tt0014326 |
| 1746512758 | 1923 | 1923 | Boy of Mine                                 | Boy of Mine                                 | Beaudine, William              | William Beaudine     | tt0013884 |
| 1746581995 | 1928 | 1928 | Texas Tommy                                 | Texas Tommy                                 | McGowan, J. P.                 | J.P. McGowan         | tt0019458 |
| 1746585186 | 1930 | 1930 | Rough Romance                               | Rough Romance                               | Erickson, A. F.                | A.F. Erickson        | tt0021319 |
| 1746530803 | 1949 | 1949 | A Connecticut Yankee in King Arthur's Court | A Connecticut Yankee in King Arthur's Court | Garnett, Tay                   | Tay Garnett          | tt0041259 |
| 1746514529 | 1923 | 1923 | The Exciters                                | The Exciters                                | Campbell, Maurice              | Maurice Campbell     | tt0014027 |
| 1746394203 | 1983 | 1982 | Liquid Sky                                  | Liquid Sky                                  | Tsukerman, Slava               | Slava Tsukerman      | tt0085852 |
| 1746584163 | 1939 | 1939 | The Stranger from Texas                     | The Stranger from Texas                     | Nelson, Sam                    | Sam Nelson           | tt0033106 |
| 1746580396 | 1939 | 1939 | In Name Only                                | In Name Only                                | Cromwell, John                 | John Cromwell        | tt0031477 |
| 1746583636 | 1931 | 1931 | Too Many Cooks                              | Too Many Cooks                              | Seiter, William                | William A. Seiter    | tt0022491 |
| 1746509009 | 1925 | 1925 | Free To Love                                | Free to Love                                | O'Connor, Frank                | Frank O'Connor       | tt0015840 |
| 1746475282 | 1947 | 1947 | California                                  | California                                  | Farrow, John                   | John Farrow          | tt0038392 |
| 1746555639 | 1957 | 1957 | The Buster Keaton Story                     | The Buster Keaton Story                     | Sheldon, Sidney                | Sidney Sheldon       | tt0050218 |
| 1746582148 | 1928 | 1928 | Their Hour                                  | Their Hour                                  | Raboch, Alfred                 | Alfred Raboch        | tt0019464 |
| 1746499867 | 1949 | 1949 | A Letter to Three Wives                     | A Letter to Three Wives                     | Mankiewicz, Joseph L.          | Joseph L. Mankiewicz | tt0041587 |
| 1746520880 | 1925 | 1925 | Some Pun'kins                               | Some Pun'kins                               | Storm, Jerome                  | Jerome Storm         | tt0016371 |
| 1746497038 | 1920 | 1920 | The Sacred Ruby                             | The Sacred Ruby                             | White, Glenn                   | Glen White           | tt0188188 |
| 1746584670 | 1929 | 1929 | Illusion                                    | Illusion                                    | Mendes, Lothar                 | Lothar Mendes        | tt0020016 |
| 1746578640 | 1958 | 1958 | Villa!                                      | Villa!!                                     | Clark, James B.                | James B. Clark       | tt0052366 |
| 1746475722 | 1947 | 1947 | The Web                                     | The Web                                     | Gordon, Michael                | Michael Gordon       | tt0039973 |
| 1746566285 | 1954 | 1954 | Bitter Creek                                | Bitter Creek                                | Carr, Thomas                   | Thomas Carr          | tt0046782 |
| 1746394698 | 1988 | 1988 | Alien Nation                                | Alien Nation                                | Baker, Graham                  | Graham Baker         | tt0094631 |
| 1746562018 | 1954 | 1953 | Barefoot Battalion                          | The Barefoot Battalion                      | Tallas, Gregg G.               | Gregg G. Tallas      | tt0168487 |
| 1769970846 | 1915 | 1915 | The Thirteenth Girl                         | The Thirteenth Girl                         | Marston, Theodore              | Theodore Marston     | tt0344448 |
| 1746560748 | 1965 | 1965 | Dark Intruder                               | Dark Intruder                               | Hart, Harvey                   | Harvey Hart          | tt0059083 |

|            |      |      |                                  |                                  |                                    |                     |           |
|------------|------|------|----------------------------------|----------------------------------|------------------------------------|---------------------|-----------|
| 1746523813 | 1915 | 1915 | May Blossom                      | May Blossom                      | Dwan, Allan                        | Allan Dwan          | tt0005732 |
| 1746580513 | 1938 | 1938 | Just Around the Corner           | Just Around the Corner           | Cummings, Irving                   | Irving Cummings     | tt0030302 |
| 1746516136 | 1920 | 1920 | Outside the Law                  | Outside the Law                  | Browning, Tod                      | Tod Browning        | tt0012538 |
| 1746562178 | 1953 | 1953 | Mission over Korea               | Mission Over Korea               | Sears, Fred F.                     | Fred F. Sears       | tt0046079 |
| 1746584577 | 1929 | 1929 | Father and Son                   | Father and Son                   | Kenton, Erle C.                    | Erle C. Kenton      | tt0019874 |
| 1746584895 | 1940 | 1940 | Son of the Navy                  | Son of the Navy                  | Nigh, William                      | William Nigh        | tt0033078 |
| 1746501388 | 1910 | 1910 | A Tale of the Sea                | A Tale of the Sea                |                                    | Francis Boggs       | tt0234847 |
| 1746514787 | 1916 | 1916 | Sally in Our Alley               | Sally in Our Alley               | Vale, Travers                      | Travers Vale        | tt0007283 |
| 1746585290 | 1930 | 1930 | Ladies of Leisure                | Ladies of Leisure                | Capra, Frank                       | Frank Capra         | tt0021040 |
| 1746582265 | 1931 | 1931 | Merely Mary Ann                  | Merely Mary Ann                  | King, Henry                        | Henry King          | tt0022142 |
| 1746580659 | 1935 | 1935 | The Fighting Lady                | Fighting Lady                    | Borcosque, Carlos                  | Carlos F. Borcosque | tt0026351 |
| 1746467030 | 1917 | 1917 | The Reed Case                    | The Reed Case                    | Holubar, Allen                     | Allen Holubar       | tt0008505 |
| 1746566259 | 1954 | 1954 | Charge of the Lancers            | Charge of the Lancers            | Castle, William                    | William Castle      | tt0046847 |
| 1746492442 | 1948 | 1948 | Four Faces West                  | Four Faces West                  | Green, Alfred E.                   | Alfred E. Green     | tt0040370 |
| 1746513444 | 1916 | 1916 | The Devil's Double               | The Devil's Double               | Hart, William S.                   | William S. Hart     | tt0006588 |
| 1746491869 | 1948 | 1948 | Shanghai Chest                   | The Shanghai Chest               | Beaudine, William                  | William Beaudine    | tt0040778 |
| 1746474975 | 1947 | 1947 | Jungle Flight                    | Jungle Flight                    | Stewart, Peter                     | Sam Newfield        | tt0039523 |
| 1746484442 | 1918 | 1918 | A Woman's Fool                   | A Woman's Fool                   | Ford, Jack                         | John Ford           | tt0009837 |
| 1746574721 | 1935 | 1935 | Dinky                            | Dinky                            | Lederman, D. Ross; Bretherton, How | Howard Bretherton   | tt0026279 |
| 1746530794 | 1949 | 1949 | Prince of the Plains             | Prince of the Plains             | Ford, Philip                       | Philip Ford         | tt0040711 |
| 1746565921 | 1953 | 1953 | The Marksman                     | The Marksman                     | Collins, Lewis                     | Lewis D. Collins    | tt0046047 |
| 1746497872 | 1919 | 1919 | What Every Woman Wants           | What Every Woman Wants           | Hampton, Jesse D.                  | Jesse D. Hampton    | tt0194528 |
| 1745372307 | 2002 | 2002 | Full Frontal                     | Full Frontal                     | Soderbergh, Steven                 | Steven Soderbergh   | tt0290212 |
| 1746520885 | 1948 | 1948 | Whiplash                         | Whiplash                         | Seiler, Lew                        | Lewis Seiler        | tt0040963 |
| 1746500277 | 1924 | 1924 | Chalk Marks                      | Chalk Marks                      | Adolfi, John G.                    | John G. Adolfi      | tt0014766 |
| 1746574049 | 1963 | 1963 | The Day Mars Invaded Earth       | The Day Mars Invaded Earth       | Dexter, Maury                      | Maury Dexter        | tt0055893 |
| 1746583344 | 1951 | 1951 | Let's Go Navy                    | Let's Go Navy!                   | Beaudine, William                  | William Beaudine    | tt0043735 |
| 1746418919 | 1940 | 1940 | You'll Find Out                  | You'll Find Out                  | Butler, David                      | David Butler        | tt0033283 |
| 1746580853 | 1938 | 1938 | Army Girl                        | Army Girl                        | Nicholls, George                   | George Nichols Jr.  | tt0029880 |
| 1746580510 | 1938 | 1938 | Professor Beware                 | Professor Beware                 | Nugent, Elliott                    | Elliott Nugent      | tt0030631 |
| 1746507850 | 1949 | 1949 | The Clay Pigeon                  | The Clay Pigeon                  | Fleischer, Richard                 | Richard Fleischer   | tt0041252 |
| 1746454453 | 1999 | 1999 | Muppets from Space               | Muppets from Space               | Hill, Tim                          | Tim Hill            | tt0158811 |
| 1746570402 | 1934 | 1934 | By Your Leave                    | By Your Leave                    | Corrigan, Lloyd                    | Lloyd Corrigan      | tt0024939 |
| 1746524262 | 1915 | 1915 | The Blindness of Virtue          | The Blindness of Virtue          | Totten, Joseph Byron               | Joseph Byron Totten | tt0004981 |
| 1746508097 | 1926 | 1926 | The Romance of a Million Dollars | The Romance of a Million Dollars | Terriss, Tom                       | Tom Terriss         | tt0158159 |
| 1746502402 | 1916 | 1916 | By Love Redeemed                 | By Love Redeemed                 | Williams, C. Jay                   | C.J. Williams       | tt0382587 |
| 1746584367 | 1936 | 1936 | Three Cheers for Love            | Three Cheers for Love            | McCarey, Ray                       | Ray McCarey         | tt0028366 |
| 1746568348 | 1934 | 1934 | Treasure Island                  | Treasure Island                  | Fleming, Victor                    | Victor Fleming      | tt0025907 |
| 1746582661 | 1937 | 1937 | Too Many Wives                   | Too Many Wives                   | Holmes, Ben                        | Ben Holmes          | tt0029679 |
| 1746574609 | 1937 | 1937 | Breakfast for Two                | Breakfast for Two                | Santell, Alfred                    | Alfred Santell      | tt0028659 |
| 1746584133 | 1937 | 1937 | Parnell                          | Parnell                          | Stahl, John M.                     | John M. Stahl       | tt0029377 |
| 1746578982 | 1950 | 1950 | Never Fear                       | Never Fear                       | Lupino, Ida                        | Ida Lupino          | tt0042783 |
| 1746409984 | 1982 | 1982 | Creepshow                        | Creepshow                        | Romero, George A.                  | George A. Romero    | tt0083767 |
| 1746394534 | 1988 | 1988 | Maniac Cop                       | Maniac Cop                       | Lustig, William                    | William Lustig      | tt0095583 |
| 1746512110 | 1910 | 1910 | The Wild Man of Borneo           | The Wild Man of Borneo           |                                    |                     | tt1799144 |
| 1746583017 | 1935 | 1935 | Atlantic Adventure               | Atlantic Adventure               | Rogell, Albert                     | Albert S. Rogell    | tt0026085 |
| 1746582374 | 1930 | 1930 | College Lovers                   | College Lovers                   | Adolfi, John G.                    | John G. Adolfi      | tt0020778 |
| 1746501155 | 1915 | 1915 | Madame Butterfly                 | Madame Butterfly                 | Olcott, Sidney                     | Sidney Olcott       | tt0005682 |
| 1746576860 | 1932 | 1932 | Scarlet Dawn                     | Scarlet Dawn                     | Dieterle, William                  | William Dieterle    | tt0022308 |
| 1746410585 | 1990 | 1990 | Flatliners                       | Flatliners                       | Schumacher, Joel                   | Joel Schumacher     | tt0099582 |
| 1746514129 | 1917 | 1917 | The Flame of the Yukon           | The Flame of the Yukon           | Miller, Charles                    | Charles Miller      | tt0196562 |
| 1746575023 | 1936 | 1936 | The Case of the Velvet Claws     | The Case of the Velvet Claws     | Clemens, William                   | William Clemens     | tt0027429 |
| 1746465398 | 1944 | 1944 | You Can't Ration Love            | You Can't Ration Love            | Fuller, Lester                     | Lester Fuller       | tt0037475 |
| 1746578537 | 1959 | 1959 | City of Fear                     | City of Fear                     | Lerner, Irving                     | Irving Lerner       | tt0052696 |
| 1746249483 | 1978 | 1978 | Foul Play                        | Foul Play                        | Higgins, Colin                     | Colin Higgins       | tt0077578 |
| 1746561973 | 1954 | 1954 | Southwest Passage                | Southwest Passage                | Nazzaro, Ray                       | Ray Nazzaro         | tt0047517 |
| 1746574850 | 1937 | 1936 | The Plainsman                    | The Plainsman                    | DeMille, Cecil B.                  | Cecil B. DeMille    | tt0028108 |

|                   |             |             |                                                    |                                                |                                  |                          |                  |
|-------------------|-------------|-------------|----------------------------------------------------|------------------------------------------------|----------------------------------|--------------------------|------------------|
| 1746476204        | 1944        | 1944        | Song of Russia                                     | Song of Russia                                 | Ratoff, Gregory                  | Gregory Ratoff           | tt0036378        |
| 1745341279        | 2004        | 2004        | Garden State                                       | Garden State                                   | Braff, Zach                      | Zach Braff               | tt0333766        |
| 1746514751        | 1914        | 1914        | Fighting Death                                     | Fighting Death                                 | Blaché, Herbert                  | Herbert Blaché           | tt0003959        |
| 1746496128        | 1918        | 1918        | Hell's Crater                                      | Hell's Crater                                  | Pearson, W. B.                   | W. B. Pearson            | tt0009155        |
| 1746580685        | 1939        | 1939        | The Private Lives of Elizabeth and Essex           | The Private Lives of Elizabeth and Essex       | Curtiz, Michael                  | Michael Curtiz           | tt0031826        |
| 1746577622        | 1934        | 1934        | Wonder Bar                                         | Wonder Bar                                     | Bacon, Lloyd                     | Lloyd Bacon              | tt0026007        |
| 1746211214        | 1972        | 1972        | Winter Soldier                                     | Winter Soldier                                 |                                  |                          | tt0204058        |
| 1746474808        | 1947        | 1947        | Smoky River Serenade                               | Smoky River Serenade                           | Abrahams, Derwin                 | Derwin Abrahams          | tt0039841        |
| 1746574396        | 1950        | 1950        | Harvey                                             | Harvey                                         | Koster, Henry                    | Henry Koster             | tt0042546        |
| 1746583800        | 1931        | 1931        | The Big Gamble                                     | The Big Gamble                                 | Niblo, Fred                      | Fred Niblo               | tt0021659        |
| 1746577899        | 1938        | 1938        | Tough Kid                                          | Tough Kid                                      | Bretherton, Howard               | Howard Bretherton        | tt0032048        |
| 1746574387        | 1963        | 1963        | Who's Minding the Store?                           | Who's Minding the Store?                       | Tashlin, Frank                   | Frank Tashlin            | tt0057683        |
| 1746553835        | 1963        | 1962        | How the West Was Won                               | How the West Was Won                           |                                  | John Ford                | tt0056085        |
| 1746584928        | 1940        | 1940        | Arise, My Love                                     | Arise, My Love                                 | Leisen, Mitchell                 | Mitchell Leisen          | tt0032220        |
| 1745359580        | 2003        | 2003        | Cheaper by the Dozen                               | Cheaper by the Dozen                           | Levy, Shawn                      | Shawn Levy               | tt0349205        |
| 1769970405        | 1965        | 1965        | Naughty Nudes                                      | Naughty Nudes                                  | Michael, James                   | Barry Mahon              | tt0126504        |
| 1745293531        | 2006        | 2005        | The Lady in Question is Charles Busch              | The Lady in Question Is Charles Busch          | Catania, John ; Ignacio, Charles | John Catania             | tt0426508        |
| 1746580321        | 1939        | 1939        | Frontier Pony Express                              | Frontier Pony Express                          | Kane, Joseph                     | Joseph Kane              | tt0031347        |
| 1746473929        | 1944        | 1944        | Shine on Harvest Moon                              | Shine on Harvest Moon                          | Butler, David                    | David Butler             | tt0037273        |
| 1746580283        | 1937        | 1937        | I'll Take Romance                                  | I'll Take Romance                              | Griffith, Edward H.              | Edward H. Griffith       | tt0029043        |
| 1746464915        | 1941        | 1941        | In Old Colorado                                    | In Old Colorado                                | Bretherton, Howard               | Howard Bretherton        | tt0033753        |
| 1746574623        | 1935        | 1935        | The Dark Angel                                     | The Dark Angel                                 | Franklin, Sidney                 | Sidney Franklin          | tt0026264        |
| 1746523833        | 1923        | 1923        | A Chapter in Her Life                              | A Chapter in Her Life                          | Weber, Lois                      | Lois Weber               | tt0013917        |
| 1746498486        | 1920        | 1920        | A Cumberland Romance                               | A Cumberland Romance                           | Maigne, Charles                  | Charles Maigne           | tt0011082        |
| 1746424237        | 1943        | 1943        | Bataan                                             | Batman                                         | Garnett, Tay                     | Lambert Hillyer          | tt0035665        |
| 1746530739        | 1949        | 1949        | Homicide                                           | Homicide                                       | Jacoves, Felix                   | Felix Jacoves            | tt0041482        |
| 1746235021        | 1971        | 1971        | The Return of Count Yorga                          | The Return of Count Yorga                      | Kelljan, Bob                     | Bob Kelljan              | tt0067671        |
| 1746435837        | 1996        | 1996        | Moll Flanders                                      | Moll Flanders                                  | Densham, Pen                     | Pen Densham              | tt0117071        |
| 1746569540        | 1958        | 1958        | Manhunt in the Jungle                              | Manhunt in the Jungle                          | McGowan, Tom                     | Tom McGowan              | tt0051903        |
| 1746565885        | 1954        | 1954        | The Yellow Mountain                                | The Yellow Mountain                            | Hibbs, Jesse                     | Jesse Hibbs              | tt0047685        |
| 1746514321        | 1916        | 1916        | A Yoke of Gold                                     | A Yoke of Gold                                 | Carleton, Lloyd B.               | Lloyd B. Carleton        | tt0007601        |
| 1746520359        | 1924        | 1924        | After a Million                                    | After a Million                                | Nelson, Jack                     | Jack Nelson              | tt0014648        |
| 1746217383        | 1967        | 1967        | Spree                                              | Spree                                          | Leisen, Mitchell; Green, Walon   | Walon Green              | tt0062299        |
| 1746475917        | 1948        | 1948        | B. F.'s Daughter                                   | B. F.'s Daughter                               | Leonard, Robert Z.               | Robert Z. Leonard        | tt0040141        |
| 1746583887        | 1930        | 1930        | Tom Sawyer                                         | Tom Sawyer                                     | Cromwell, John                   | John Cromwell            | tt0021483        |
| <b>1746454624</b> | <b>1940</b> | <b>1940</b> | <b>Young As You Feel</b>                           | <b>Young as You Feel</b>                       | <b>St. Clair, Malcolm</b>        | <b>Malcolm St. Clair</b> | <b>tt0033290</b> |
| 1746437414        | 1940        | 1940        | I Married Adventure                                | I Married Adventure                            |                                  |                          | tt0301435        |
| 1746495975        | 1920        | 1920        | The Devil to Pay                                   | The Devil to Pay                               | Warde, Ernest C.                 | Ernest C. Warde          | tt0011111        |
| 1745359994        | 2003        | 2003        | Bulletproof Monk                                   | Bulletproof Monk                               | Hunter, Paul                     | Paul Hunter              | tt0245803        |
| 1746583463        | 1929        | 1929        | After the Fog                                      | After the Fog                                  | De Cordova, Leander              | Leander De Cordova       | tt0019625        |
| 1746523556        | 1923        | 1923        | Lawful Larceny                                     | Lawful Larceny                                 | Dwan, Allan                      | Allan Dwan               | tt0014190        |
| 1746567934        | 1952        | 1952        | This Is Cinerama                                   | This Is Cinerama                               |                                  | Merian C. Cooper         | tt0045231        |
| 1746420976        | 1992        | 1992        | Frozen Assets                                      | Frozen Assets                                  | Miller, George                   | George Miller            | tt0104309        |
| <b>1746514953</b> | <b>1917</b> | <b>1917</b> | <b>An Amateur Orphan</b>                           | <b>An Amateur Orphan</b>                       | <b>Brooke, Van Dyke</b>          | <b>Van Dyke Brooke</b>   | <b>tt0007630</b> |
| 1746454493        | 1941        | 1941        | Meet Boston Blackie                                | Meet Boston Blackie                            | Florey, Robert                   | Robert Florey            | tt0033890        |
| 1746507836        | 1949        | 1949        | Laramie                                            | Laramie                                        | Nazarro, Ray                     | Ray Nazarro              | tt0041577        |
| 1746562329        | 1953        | 1953        | Kansas Pacific                                     | Kansas Pacific                                 | Nazarro, Ray                     | Ray Nazarro              | tt0045954        |
| 1746454365        | 1944        | 1943        | Thousands Cheer                                    | Thousands Cheer                                | Sidney, George                   | George Sidney            | tt0036432        |
| 1746514951        | 1927        | 1927        | Finger Prints                                      | Finger Prints                                  | Bacon, Lloyd                     | Lloyd Bacon              | tt0017883        |
| 1746475967        | 1944        | 1943        | Swingtime Johnny                                   | Swingtime Johnny                               | Cline, Edward F.                 | Edward F. Cline          | tt0036409        |
| 1746508038        | 1924        | 1924        | Trail Dust                                         | Trail Dust                                     | Hines, Gordon                    | Gordon Hines             | tt0173346        |
| 1746503695        | 1919        | 1919        | The Betrayal                                       | The Betrayal                                   | Barry, J. A.                     | J. A. Barry              | tt0186869        |
| 1746491980        | 1945        | 1945        | Song of Old Wyoming                                | Song of Old Wyoming                            | Emmett, Robert                   | Robert Emmett Tansey     | tt0038101        |
| 1746393365        | 1988        | 1988        | The Decline of Western Civilization Part II: The M | The Decline of Western Civilization Part II: T | Spheeris, Penelope               | Penelope Spheeris        | tt0094980        |
| 1746524836        | 1916        | 1916        | Ramona                                             | Ramona                                         | Crisp, Donald                    | Donald Crisp             | tt0007248        |
| 1746209905        | 1970        | 1970        | Start the Revolution Without Me                    | Start the Revolution Without Me                | Yorkin, Bud                      | Bud Yorkin               | tt0066402        |
| 1746500210        | 1925        | 1925        | The Outlaw's Daughter                              | The Outlaw's Daughter                          | O'Brien, John B.                 | John B. O'Brien          | tt0016189        |

1

1

|            |      |      |                              |                              |                     |                    |           |
|------------|------|------|------------------------------|------------------------------|---------------------|--------------------|-----------|
| 1746580899 | 1934 | 1934 | The Last Gentleman           | The Last Gentleman           | Lanfield, Sidney    | Sidney Lanfield    | tt0025368 |
| 1746585024 | 1939 | 1939 | Two Thoroughbreds            | Two Thoroughbreds            | Hively, Jack        | Jack Hively        | tt0032067 |
| 1769970536 | 1967 | 1967 | A Good Time With a Bad Girl  | A Good Time with a Bad Girl  |                     | Barry Mahon        | tt0139258 |
| 1746533012 | 1916 | 1916 | Hoodoo Ann                   | Hoodoo Ann                   | Ingraham, Lloyd     | Lloyd Ingraham     | tt0006826 |
| 1746583526 | 1930 | 1930 | Whoopee!                     | Whoopee!                     | Freeland, Thornton  | Thornton Freeland  | tt0021549 |
| 1746509218 | 1925 | 1925 | Quick Change                 | Quick Change                 | Henderson, Dell     | Dell Henderson     | tt0016256 |
| 1746393490 | 1988 | 1988 | Shakedown                    | Shakedown                    | Glickenhau, James   | James Glickenhau   | tt0096087 |
| 1746454055 | 1945 | 1945 | The Corn Is Green            | The Corn Is Green            | Rapper, Irving      | Irving Rapper      | tt0037614 |
| 1769970054 | 1912 | 1912 | Carmen of the Isles          | Carmen of the Isles          |                     | Colin Campbell     | tt0421952 |
| 1746393121 | 1986 | 1986 | Youngblood                   | Youngblood                   | Markle, Peter       | Peter Markle       | tt0092272 |
| 1746582201 | 1929 | 1929 | The Long, Long Trail         | The Long, Long Trail         | Rosson, Arthur      | Arthur Rosson      | tt0020107 |
| 1746492069 | 1946 | 1946 | Gentleman Joe Palooka        | Gentleman Joe Palooka        | Endfield, Cyril     | Cy Endfield        | tt0038553 |
| 1746504401 | 1919 | 1919 | Men, Women and Money         | Men, Women and Money         | Melford, George     | George Melford     | tt0010452 |
| 1745342695 | 2002 | 2002 | The Country Bears            | The Country Bears            | Hastings, Peter     | Peter Hastings     | tt0276033 |
| 1746454495 | 1940 | 1940 | Stagecoach War               | Stagecoach War               | Selander, Lesley    | Lesley Selander    | tt0033099 |
| 1746533032 | 1927 | 1927 | The Desert Pirate            | The Desert Pirate            | Dugan, James        | James Dugan        | tt0017803 |
| 1746571224 | 1910 | 1910 | Francesca Da Rimini          | Francesca da Rimini          | Blackton, J. Stuart | J. Stuart Blackton | tt0200648 |
| 1746216685 | 1967 | 1967 | The Tiger Makes Out          | The Tiger Makes Out          | Hiller, Arthur      | Arthur Hiller      | tt0062369 |
| 1746576719 | 1932 | 1933 | Diamond Trail                | Diamond Trail                | Fraser, Harry       | Harry L. Fraser    | tt0022819 |
| 1746464956 | 1947 | 1947 | Boy! What a Girl!            | Boy! What a Girl!            | Leonard, Arthur     | Arthur H. Leonard  | tt0135169 |
| 1746498691 | 1918 | 1918 | Kildare of Storm             | Kildare of Storm             | Franklin, Harry L.  | Harry L. Franklin  | tt0009261 |
| 1746500428 | 1925 | 1925 | The Monster                  | The Monster                  | West, Roland        | Roland West        | tt0016123 |
| 1746513435 | 1910 | 1910 | Ononko's Vow                 | Ononko's Vow                 | McGlynn, Frank      | Frank McGlynn Sr.  | tt0001347 |
| 1746492489 | 1948 | 1948 | The Fuller Brush Man         | The Fuller Brush Man         | Simon, S. Sylvan    | S. Sylvan Simon    | tt0040379 |
| 1745342529 | 2004 | 2004 | Jersey Girl                  | Jersey Girl                  | Smith, Kevin        | Kevin Smith        | tt0300051 |
| 1746436571 | 1942 | 1942 | Hay Foot                     | Hay Foot                     | Guiol, Fred         | Fred Guiol         | tt0033696 |
| 1746585496 | 1940 | 1940 | City for Conquest            | City for Conquest            | Litvak, Anatole     | Anatole Litvak     | tt0032342 |
| 1745373914 | 2002 | 2002 | Empire                       | Empire                       | Reyes, Franc.       | Franc. Reyes       | tt0262396 |
| 1746434354 | 1991 | 1990 | Resident Alien               | Resident Alien               | Nossiter, Jonathan  | Jonathan Nossiter  | tt0102777 |
| 1746582165 | 1928 | 1928 | A Trick of Hearts            | A Trick of Hearts            | Eason, Reeves       | B. Reeves Eason    | tt0019492 |
| 1746218919 | 1975 | 1975 | Let's Do It Again            | Let's Do It Again            | Poitier, Sidney     | Sidney Poitier     | tt0073282 |
| 1746524394 | 1923 | 1923 | The Eagle's Feather          | The Eagle's Feather          | Sloman, Edward      | Edward Sloman      | tt0014010 |
| 1746475962 | 1948 | 1948 | Indian Agent                 | Indian Agent                 | Selander, Lesley    | Lesley Selander    | tt0040470 |
| 1746563861 | 1952 | 1952 | The Golden Hawk              | The Golden Hawk              | Salkow, Sidney      | Sidney Salkow      | tt0044670 |
| 1746423999 | 1942 | 1942 | Blondie's Blessed Event      | Blondie's Blessed Event      | Strayer, Frank R.   | Frank R. Strayer   | tt0034527 |
| 1745340181 | 2002 | 2001 | Impostor                     | Impostor                     | Fleder, Gary        | Gary Fleder        | tt0160399 |
| 1746250181 | 1979 | 1979 | Hot Stuff                    | Hot Stuff                    | DeLuise, Dom        | Dom DeLuise        | tt0079308 |
| 1746575379 | 1931 | 1930 | Men on Call                  | Men on Call                  | Blystone, John      | John G. Blystone   | tt0021138 |
| 1746583349 | 1930 | 1930 | O'Malley Rides Alone         | O'Malley Rides Alone         | McGowan, J. P.      | J.P. McGowan       | tt0021195 |
| 1746577105 | 1963 | 1963 | Police Nurse                 | Police Nurse                 | Dexter, Maury       | Maury Dexter       | tt0057417 |
| 1746491854 | 1947 | 1947 | Song of the Thin Man         | Song of the Thin Man         | Buzzell, Edward     | Edward Buzzell     | tt0039853 |
| 1746585117 | 1928 | 1928 | Sealed Orders                | Sealed Orders                | Levigard, Josef     | Joseph Levigard    | tt0347968 |
| 1746555207 | 1957 | 1957 | Bernardine                   | Bernardine                   | Levin, Henry        | Henry Levin        | tt0050184 |
| 1746577928 | 1937 | 1937 | Renfrew of the Royal Mounted | Renfrew of the Royal Mounted | Herman, Al          | Albert Herman      | tt0029475 |
| 1746393274 | 1988 | 1988 | Monkey Shines                | Monkey Shines                | Romero, George A.   | George A. Romero   | tt0095652 |
| 1746581258 | 1961 | 1961 | The Hoodlum Priest           | The Hoodlum Priest           | Kershner, Irvin     | Irvin Kershner     | tt0054991 |
| 1746580391 | 1935 | 1935 | Bar 20 Rides Again           | Bar 20 Rides Again           | Bretherton, Howard  | Howard Bretherton  | tt0027332 |
| 1746465328 | 1947 | 1947 | The Roosevelt Story          | The Roosevelt Story          |                     | Lawrence M. Klee   | tt0218560 |
| 1746465095 | 1942 | 1942 | Juke Girl                    | Juke Girl                    | Bernhardt, Curtis   | Curtis Bernhardt   | tt0034926 |
| 1746569506 | 1955 | 1955 | Murder in Villa Capri        | Murder in Villa Capri        | Simetti, Otto       | Otto Simetti       | tt1183718 |
| 1746473753 | 1946 | 1946 | One Exciting Week            | One Exciting Week            | Beaudine, William   | William Beaudine   | tt0038801 |
| 1746571315 | 1934 | 1934 | Eight Girls in a Boat        | Eight Girls in a Boat        | Wallace, Richard    | Richard Wallace    | tt0025077 |
| 1746473889 | 1947 | 1946 | The Beast with Five Fingers  | The Beast with Five Fingers  | Florey, Robert      | Robert Florey      | tt0038338 |
| 1746503537 | 1918 | 1918 | The One Woman                | The One Woman                | Barker, Reginald    | Reginald Barker    | tt0009449 |
| 1746583392 | 1931 | 1931 | 50 Million Frenchmen         | 50 Million Frenchmen         | Bacon, Lloyd        | Lloyd Bacon        | tt0021859 |
| 1746475973 | 1945 | 1945 | The Great Flamarion          | The Great Flamarion          | Mann, Anthony       | Anthony Mann       | tt0037749 |
| 1746581195 | 1951 | 1950 | Born Yesterday               | Born Yesterday               | Cukor, George       | George Cukor       | tt0042276 |

|            |      |      |                                    |                                    |                                   |                      |           |
|------------|------|------|------------------------------------|------------------------------------|-----------------------------------|----------------------|-----------|
| 1746503999 | 1917 | 1917 | The Stolen Play                    | The Stolen Play                    | Harvey, Harry                     | Harry Harvey         | tt0008630 |
| 1746581454 | 1928 | 1928 | The Spieler                        | The Spieler                        | Garnett, Tay                      | Tay Garnett          | tt0019414 |
| 1746465389 | 1945 | 1945 | There Goes Kelly                   | There Goes Kelly                   | Karlstein, Phil                   | Phil Karlson         | tt0038158 |
| 1746581415 | 1928 | 1928 | The Tragedy of Youth               | The Tragedy of Youth               | Archainbaud, George               | George Archainbaud   | tt0019487 |
| 1746566865 | 1933 | 1933 | Ever in My Heart                   | Ever in My Heart                   | Mayo, Archie                      | Archie Mayo          | tt0023992 |
| 1746566118 | 1957 | 1957 | Valerie                            | Valerie                            | Oswald, Gerd                      | Gerd Oswald          | tt0051149 |
| 1746584623 | 1930 | 1929 | Blaze o' Glory                     | Blaze o' Glory                     | Hoffman, Renaud; Crone, George J. | George Crone         | tt0019703 |
| 1746464881 | 1944 | 1944 | The Hairy Ape                      | The Hairy Ape                      | Santell, Alfred                   | Alfred Santell       | tt0036892 |
| 1746574764 | 1937 | 1937 | Tex Rides with the Boy Scouts      | Tex Rides with the Boy Scouts      | Taylor, Ray                       | Ray Taylor           | tt0030849 |
| 1746422656 | 1996 | 1996 | Eddie                              | Eddie                              | Rash, Steve                       | Steve Rash           | tt0116168 |
| 1745302851 | 2006 | 2006 | LOL                                | LOL                                | Swanberg, Joe                     | Joe Swanberg         | tt0462392 |
| 1746580734 | 1935 | 1935 | Alias Mary Dow                     | Alias Mary Dow                     | Neumann, Kurt                     | Kurt Neumann         | tt0026053 |
| 1746491960 | 1948 | 1948 | Dream Girl                         | Dream Girl                         | Leisen, Mitchell                  | Mitchell Leisen      | tt0040302 |
| 1746203031 | 1970 | 1970 | Count Yorga, Vampire               | Count Yorga, Vampire               | Kelljan, Robert                   | Bob Kelljan          | tt0066952 |
| 1746437397 | 1941 | 1941 | Married Bachelor                   | Married Bachelor                   | Buzzell, Edward                   | Edward Buzzell       | tt0033883 |
| 1746409071 | 1991 | 1990 | Paris Is Burning                   | Paris Is Burning                   | Livingston, Jennie                | Jennie Livingston    | tt0100332 |
| 1746198285 | 1969 | 1969 | The Witchmaker                     | The Witchmaker                     | Brown, William O.                 | William O. Brown     | tt0065217 |
| 1746211057 | 1972 | 1972 | Scarecrow in a Garden of Cucumbers | Scarecrow in a Garden of Cucumbers | Kaplan, Robert J.                 | Robert J. Kaplan     | tt0135644 |
| 1746514921 | 1915 | 1915 | A Man and His Mate                 | A Man and His Mate                 | Adolfi, John G.                   | John G. Adolfi       | tt0005700 |
| 1746183279 | 1910 | 1910 | A Central American Romance         | A Central American Romance         | Dawley, J. Searle                 | J. Searle Dawley     | tt0233420 |
| 1745359586 | 2008 | 2008 | Punisher: War Zone                 | Punisher: War Zone                 | Alexander, Lexi                   | Lexi Alexander       | tt0450314 |
| 1746562429 | 1953 | 1953 | Take the High Ground!              | Take the High Ground!              | Brooks, Richard                   | Richard Brooks       | tt0046398 |
| 1746475934 | 1947 | 1947 | Step-Child                         | Stepchild                          | Flood, James                      | James Flood          | tt0039867 |
| 1746584638 | 1930 | 1930 | For the Defense                    | For the Defense                    | Cromwell, John                    | John Cromwell        | tt0020896 |
| 1746574635 | 1934 | 1934 | Honor of the Range                 | Honor of the Range                 | James, Alan                       | Alan James           | tt0025269 |
| 1746574211 | 1958 | 1958 | Tank Force                         | Tank Force                         | Young, Terence                    | Terence Young        | tt0052271 |
| 1746514530 | 1915 | 1915 | Via Wireless                       | Via Wireless                       | Fitzmaurice, George               | George Fitzmaurice   | tt0006217 |
| 1746208457 | 1969 | 1969 | Eye of the Cat                     | Eye of the Cat                     | Rich, David Lowell                | David Lowell Rich    | tt0064310 |
| 1746569943 | 1958 | 1957 | The Mark of the Hawk               | The Mark of the Hawk               | Audley, Michael                   | Michael Audley       | tt0050692 |
| 1746210636 | 1972 | 1972 | Hit Man                            | Hit Man                            | Armitage, George                  | George Armitage      | tt0068704 |
| 1746455009 | 1997 | 1997 | Event Horizon                      | Event Horizon                      | Anderson, Paul                    | Paul W.S. Anderson   | tt0119081 |
| 1746555131 | 1956 | 1956 | Thunderstorm                       | Thunderstorm                       | Guillermín, John                  | John Guillermín      | tt0048737 |
| 1746584834 | 1930 | 1930 | Lilies of the Field                | Lilies of the Field                | Korda, Alexander                  | Alexander Korda      | tt0021073 |
| 1746581052 | 1958 | 1957 | Man Without a Body                 | The Man Without a Body             | Wilder, W. Lee; Saunders, Charles | Charles Saunders     | tt0050676 |
| 1746566267 | 1957 | 1957 | Pharaoh's Curse                    | Pharaoh's Curse                    | Sholem, Lee                       | Lee Sholem           | tt0049616 |
| 1746525071 | 1921 | 1921 | Oh Mary Be Careful                 | Oh Mary Be Careful                 | Ashley, Arthur                    | Arthur Ashley        | tt0144531 |
| 1746577718 | 1936 | 1936 | Pepper                             | Pepper                             | Tinling, James                    | James Tinling        | tt0028094 |
| 1746218750 | 1972 | 1972 | Junior Bonner                      | Junior Bonner                      | Peckinpah, Sam                    | Sam Peckinpah        | tt0068786 |
| 1746502906 | 1914 | 1914 | Dope                               | Dope                               | Lieb, Herman                      | Herman Lieb          | tt0003859 |
| 1746585362 | 1939 | 1939 | The Spellbinder                    | The Spellbinder                    | Hively, Jack                      | Jack Hively          | tt0031961 |
| 1746454400 | 1945 | 1945 | Gun Smoke                          | Gun Smoke                          | Bretherton, Howard                | Howard Bretherton    | tt0037757 |
| 1746508727 | 1925 | 1925 | Drusilla With a Million            | Drusilla with a Million            | Weight, F. Harmon                 | F. Harmon Weight     | tt0015767 |
| 1746251016 | 1977 | 1977 | Oh, God!                           | Oh, God!                           | Reiner, Carl                      | Carl Reiner          | tt0076489 |
| 1746585041 | 1940 | 1940 | Knute Rockne--All American         | Knute Rockne All American          | Bacon, Lloyd                      | Lloyd Bacon          | tt0032676 |
| 1746408636 | 1986 | 1986 | The Money Pit                      | The Money Pit                      | Benjamin, Richard                 | Richard Benjamin     | tt0091541 |
| 1746563638 | 1953 | 1953 | Below the Sahara                   | Below the Sahara                   | Denis, Armand                     | Armand Denis         | tt0209936 |
| 1746436536 | 1943 | 1942 | Seven Miles from Alcatraz          | Seven Miles from Alcatraz          | Dmytryk, Edward                   | Edward Dmytryk       | tt0035308 |
| 1745359403 | 2003 | 2003 | A Decade Under the Influence       | A Decade Under the Influence       | LaGravenese, Richard; Demme, Ted  | Ted Demme            | tt0342275 |
| 1746474139 | 1947 | 1947 | The Unfinished Dance               | The Unfinished Dance               | Koster, Henry                     | Henry Koster         | tt0039938 |
| 1746439702 | 1997 | 1997 | A Smile Like Yours                 | A Smile Like Yours                 | Samples, Keith                    | Keith Samples        | tt0120151 |
| 1746553740 | 1965 | 1965 | Taffy and the Jungle Hunter        | Taffy and the Jungle Hunter        | Morse, Terry O.                   | Terry O. Morse       | tt0059779 |
| 1746394219 | 1990 | 1990 | The Godfather Part III             | The Godfather: Part III            | Coppola, Francis Ford             | Francis Ford Coppola | tt0099674 |
| 1746512442 | 1916 | 1916 | Poor Little Peppina                | Poor Little Peppina                | Olcott, Sidney                    | Sidney Olcott        | tt0007202 |
| 1746582632 | 1937 | 1937 | Roaring Timber                     | Roaring Timber                     | Rosen, Phil                       | Phil Rosen           | tt0029494 |
| 1746235418 | 1975 | 1975 | The Rocky Horror Picture Show      | The Rocky Horror Picture Show      | Sharman, Jim                      | Jim Sharman          | tt0073629 |
| 1746585173 | 1930 | 1930 | Numbered Men                       | Numbered Men                       | LeRoy, Mervyn                     | Mervyn LeRoy         | tt0021192 |
| 1746499987 | 1948 | 1948 | Black Bart                         | Black Bart                         | Sherman, George                   | George Sherman       | tt0040167 |

|            |      |      |                                                 |                                                 |                               |                                     |           |
|------------|------|------|-------------------------------------------------|-------------------------------------------------|-------------------------------|-------------------------------------|-----------|
| 1746507911 | 1924 | 1924 | Helen's Babies                                  | Helen's Babies                                  | Seiter, William A.            | William A. Seiter                   | tt0014978 |
| 1746486428 | 1917 | 1917 | The Silence Sellers                             | The Silence Sellers                             | King, Burton L.               | Burton L. King                      | tt0182422 |
| 1746439483 | 1944 | 1944 | Sailor's Holiday                                | Sailor's Holiday                                | Berke, William                | William Berke                       | tt0037242 |
| 1746454705 | 1941 | 1941 | Niagara Falls                                   | Niagara Falls                                   | Douglas, Gordon               | Gordon Douglas                      | tt0033949 |
| 1746508579 | 1927 | 1927 | Sorrell and Son                                 | Sorrell and Son                                 |                               | Herbert Brenon                      | tt0018429 |
| 1746577336 | 1958 | 1958 | Terror in a Texas Town                          | Terror in a Texas Town                          | Lewis, Joseph H.              | Joseph H. Lewis                     | tt0052287 |
| 1746574465 | 1952 | 1952 | Indian Uprising                                 | Indian Uprising                                 | Nazarro, Ray                  | Ray Nazarro                         | tt0179868 |
| 1746520873 | 1950 | 1950 | Kill the Umpire                                 | Kill the Umpire                                 | Bacon, Lloyd                  | Lloyd Bacon                         | tt0042641 |
| 1746503689 | 1921 | 1921 | The Love Light                                  | The Love Light                                  | Marion, Frances               | Frances Marion                      | tt0012408 |
| 1746555891 | 1954 | 1954 | Human Desire                                    | Human Desire                                    | Lang, Fritz                   | Fritz Lang                          | tt0047101 |
| 1746583491 | 1929 | 1929 | Far Western Trails                              | Far Western Trails                              | Horner, Robert J.             | Robert J. Horner                    | tt0325358 |
| 1746574906 | 1938 | 1938 | There Goes My Heart                             | There Goes My Heart                             | McLeod, Norman Z.             | Norman Z. McLeod                    | tt0030856 |
| 1746183504 | 1910 | 1910 | Away Out West                                   | Away Out West                                   | Anderson, G. M.               | Gilbert M. 'Broncho Billy' Anderson | tt0001123 |
| 1746394021 | 1986 | 1986 | Howard the Duck                                 | Howard the Duck                                 | Huyck, Willard                | Willard Huyck                       | tt0091225 |
| 1746566220 | 1954 | 1953 | Sea of Lost Ships                               | Sea of Lost Ships                               | Kane, Joseph                  | Joseph Kane                         | tt0046287 |
| 1769970685 | 1968 | 1968 | Motel Wives                                     | Motel Wives                                     | Clay, Adam                    | Adam Clay                           | tt0251864 |
| 1746569773 | 1953 | 1953 | Paris Model                                     | Paris Model                                     | Green, Alfred E.              | Alfred E. Green                     | tt0046165 |
| 1746394728 | 1992 | 1992 | Beethoven                                       | Beethoven                                       | Levant, Brian                 | Brian Levant                        | tt0103786 |
| 1746553228 | 1963 | 1962 | Diamond Head                                    | Diamond Head                                    | Green, Guy                    | Guy Green                           | tt0055905 |
| 1746491988 | 1945 | 1945 | Patrick the Great                               | Patrick the Great                               | Ryan, Frank                   | Frank Ryan                          | tt0037975 |
| 1746216650 | 1967 | 1967 | The Busy Body                                   | The Busy Body                                   | Castle, William               | William Castle                      | tt0061431 |
| 1746486466 | 1921 | 1921 | The Sage Hen                                    | The Sage Hen                                    | Lewis, Edgar                  | Edgar Lewis                         | tt0012641 |
| 1746208689 | 1966 | 1966 | The Russians Are Coming The Russians Are Coming | The Russians Are Coming the Russians Are Coming | Jewison, Norman               | Norman Jewison                      | tt0060921 |
| 1746585472 | 1939 | 1939 | City in Darkness                                | City in Darkness                                | Leeds, Herbert I.             | Herbert I. Leeds                    | tt0031148 |
| 1746520032 | 1949 | 1949 | Mr. Belvedere Goes to College                   | Mr. Belvedere Goes to College                   | Nugent, Elliott               | Elliott Nugent                      | tt0041662 |
| 1746514392 | 1916 | 1916 | The Embodied Thought                            | The Embodied Thought                            | Sloman, Edward                | Edward Sloman                       | tt0322163 |
| 1746410701 | 1994 | 1994 | Angie                                           | Angie                                           | Coolidge, Martha              | Martha Coolidge                     | tt0109129 |
| 1746564485 | 1952 | 1952 | Scaramouche                                     | Scaramouche                                     | Sidney, George                | George Sidney                       | tt0045125 |
| 1746580923 | 1963 | 1963 | All the Way Home                                | All the Way Home                                | Segal, Alex                   | Alex Segal                          | tt0056818 |
| 1746570286 | 1933 | 1933 | Our Betters                                     | Our Betters                                     | Cukor, George                 | George Cukor                        | tt0024421 |
| 1746585125 | 1929 | 1929 | Two Sisters                                     | Two Sisters                                     | Pembroke, Scott               | Scott Pembroke                      | tt0020526 |
| 1746581520 | 1928 | 1928 | Scarlet Youth                                   | Scarlet Youth                                   | Curran, William Hughes        | William Hughes Curran               | tt0019359 |
| 1746502913 | 1927 | 1927 | The Heart Thief                                 | The Heart Thief                                 | Chrisander, Nils Olaf         | Nils Olaf Chrisander                | tt0017972 |
| 1746217646 | 1967 | 1967 | The Born Losers                                 | The Born Losers                                 | Frank, T. C.                  | Tom Laughlin                        | tt0061420 |
| 1746566168 | 1956 | 1956 | The Man Who Knew Too Much                       | The Man Who Knew Too Much                       | Hitchcock, Alfred             | Alfred Hitchcock                    | tt0049470 |
| 1746567748 | 1952 | 1952 | Because of You                                  | Because of You                                  | Pevney, Joseph                | Joseph Pevney                       | tt0044403 |
| 1746507576 | 1926 | 1926 | King of the Pack                                | King of the Pack                                | Richardson, Frank             | Frank Richardson                    | tt0126369 |
| 1746408921 | 1992 | 1992 | Innocent Blood                                  | Innocent Blood                                  | Landis, John                  | John Landis                         | tt0104511 |
| 1746568276 | 1934 | 1934 | Hitler's Reign of Terror                        | Hitler's Reign of Terror                        | Mindlin, Michael              | Michael Mindlin                     | tt0213716 |
| 1746578034 | 1935 | 1935 | Stone of Silver Creek                           | Stone of Silver Creek                           | Grinde, Nick                  | Nick Grinde                         | tt0027044 |
| 1746500087 | 1948 | 1948 | In This Corner                                  | In This Corner                                  | Riesner, Charles F.           | Charles Reisner                     | tt0189604 |
| 1746454067 | 1943 | 1943 | This Land Is Mine                               | This Land Is Mine                               | Renoir, Jean                  | Jean Renoir                         | tt0036431 |
| 1746580249 | 1938 | 1938 | Nancy Drew, Detective                           | Nancy Drew: Detective                           | Clemens, William              | William Clemens                     | tt0030491 |
| 1746567584 | 1952 | 1952 | Fearless Fagan                                  | Fearless Fagan                                  | Donen, Stanley                | Stanley Donen                       | tt0044608 |
| 1746574530 | 1933 | 1933 | Gigolettes of Paris                             | Gigolettes of Paris                             | Martell, Alphonse             | Alphonse Martell                    | tt0024059 |
| 1746409946 | 1984 | 1984 | Unfaithfully Yours                              | Unfaithfully Yours                              | Zieff, Howard                 | Howard Zieff                        | tt0088326 |
| 1746208614 | 1969 | 1968 | I Sailed to Tahiti With an All Girl Crew        | I Sailed to Tahiti with an All Girl Crew        | Bare, Richard                 | Richard L. Bare                     | tt0063117 |
| 1746570357 | 1934 | 1934 | George White's Scandals                         | George White's Scandals                         |                               | Thornton Freeland                   | tt0025166 |
| 1746520476 | 1925 | 1925 | The White Monkey                                | The White Monkey                                | Rosen, Phil                   | Phil Rosen                          | tt0016525 |
| 1746235803 | 1977 | 1977 | Pumping Iron                                    | Pumping Iron                                    | Butler, George; Fiore, Robert | George Butler                       | tt0076578 |
| 1746579056 | 1951 | 1951 | Street Bandits                                  | Street Bandits                                  | Springsteen, R. G.            | R.G. Springsteen                    | tt0044080 |
| 1746483203 | 1917 | 1917 | The Devil's Playground                          | The Devil's Playground                          | Webster, Harry McRae          | Harry McRae Webster                 | tt0182976 |
| 1746497056 | 1922 | 1922 | The Marshal of Moneymint                        | The Marshal of Moneymint                        | Clements, Roy                 | Roy Clements                        | tt0332700 |
| 1746186088 | 1968 | 1968 | The Stalking Moon                               | The Stalking Moon                               | Mulligan, Robert              | Robert Mulligan                     | tt0065032 |
| 1746512315 | 1922 | 1922 | Domestic Relations                              | Domestic Relations                              | Withey, Chet                  | Chester Withey                      | tt0013077 |
| 1746410543 | 1987 | 1987 | Down Twisted                                    | Down Twisted                                    | Pyun, Albert                  | Albert Pyun                         | tt0092922 |
| 1746560086 | 1965 | 1965 | Fort Courageous                                 | Fort Courageous                                 | Selander, Lesley              | Lesley Selander                     | tt0122071 |



|            |      |      |                                          |                                          |                                    |                     |           |
|------------|------|------|------------------------------------------|------------------------------------------|------------------------------------|---------------------|-----------|
| 1746475267 | 1948 | 1948 | 16 Fathoms Deep                          | 16 Fathoms Deep                          | Allen, Irving                      | Irving Allen        | tt0040797 |
| 1746508474 | 1926 | 1926 | The Mystery Club                         | The Mystery Club                         | Blaché, Herbert                    | Herbert Blaché      | tt0017191 |
| 1746497934 | 1919 | 1919 | A Taste of Life                          | A Taste of Life                          | Dillon, Jack                       | John Francis Dillon | tt0010759 |
| 1746503013 | 1923 | 1923 | Little Old New York                      | Little Old New York                      | Olcott, Sidney                     | Sidney Olcott       | tt0014205 |
| 1746219345 | 1975 | 1975 | Cleopatra Jones and the Casino of Gold   | Cleopatra Jones and the Casino of Gold   | Bail, Chuck                        | Charles Bail        | tt0072791 |
| 1746581164 | 1960 | 1960 | Walk Like a Dragon                       | Walk Like a Dragon                       | Clavell, James                     | James Clavell       | tt0054457 |
| 1746570153 | 1933 | 1933 | India Speaks                             | India Speaks                             |                                    | Walter Futter       | tt0024178 |
| 1746475926 | 1944 | 1944 | Jungle Woman                             | Jungle Woman                             | LeBorg, Reginald                   | Reginald Le Borg    | tt0036975 |
| 1746504394 | 1919 | 1919 | Jinx                                     | Jinx                                     | Schertzinger, Victor L.            | Victor Schertzinger | tt0010313 |
| 1746583274 | 1928 | 1928 | Craig's Wife                             | Craig's Wife                             | de Mille, William C.               | William C. de Mille | tt0018800 |
| 1746582046 | 1928 | 1928 | Adoration                                | Adoration                                | Lloyd, Frank                       | Frank Lloyd         | tt0018622 |
| 1746475725 | 1948 | 1948 | The Gallant Legion                       | The Gallant Legion                       | Kane, Joe                          | Joseph Kane         | tt0040383 |
| 1746210799 | 1970 | 1970 | Airport                                  | Airport                                  | Seaton, George                     | George Seaton       | tt0065377 |
| 1746578911 | 1950 | 1950 | The Texan Meets Calamity Jane            | The Texan Meets Calamity Jane            | Lamb, Ande                         | Ande Lamb           | tt0043035 |
| 1746454181 | 1996 | 1996 | The Phantom                              | The Phantom                              | Wincer, Simon                      | Simon Wincer        | tt0117331 |
| 1746502586 | 1910 | 1910 | The Salt on the Bird's Tail              | Salt on the Bird's Tail                  |                                    | Gaston Méliès       | tt0274077 |
| 1746507731 | 1926 | 1926 | The Speeding Venus                       | The Speeding Venus                       | Thornby, Robert                    | Robert Thornby      | tt0017424 |
| 1746270447 | 1979 | 1979 | Swap Meet                                | Swap Meet                                | Mack, Brice                        | Brice Mack          | tt0079974 |
| 1746520440 | 1926 | 1926 | The Ramblin' Galoot                      | The Ramblin' Galoot                      | Bain, Fred                         | Fred Bain           | tt0017308 |
| 1746566342 | 1953 | 1953 | Stalag 17                                | Stalag 17                                | Wilder, Billy                      | Billy Wilder        | tt0046359 |
| 1746198445 | 1966 | 1966 | Las Vegas Hillbillies                    | Las Vegas Hillbillies                    | Pierce, Arthur C.                  | Arthur C. Pierce    | tt0060618 |
| 1746570416 | 1934 | 1934 | Thirty Day Princess                      | Thirty Day Princess                      | Gering, Marion                     | Marion Gering       | tt0025880 |
| 1746257196 | 1979 | 1978 | Starcrash                                | Starcrash                                | Coates, Lewis                      | Luigi Cozzi         | tt0079946 |
| 1746584891 | 1939 | 1939 | Sued for Libel                           | Sued for Libel                           | Goodwins, Leslie                   | Leslie Goodwins     | tt0033113 |
| 1746566373 | 1956 | 1956 | The Ten Commandments                     | The Ten Commandments                     | DeMille, Cecil B.                  | Cecil B. DeMille    | tt0049833 |
| 1746555962 | 1957 | 1957 | Quantez                                  | Quantez                                  | Keller, Harry                      | Harry Keller        | tt0050872 |
| 1746542629 | 1926 | 1926 | The Roaring Road                         | Roaring Road                             | Hurst, Paul                        | Paul Hurst          | tt0461833 |
| 1746578865 | 1958 | 1958 | The Thing That Couldn't Die              | The Thing That Couldn't Die              | Cowan, Will                        | Will Cowan          | tt0052289 |
| 1746570994 | 1933 | 1933 | The Fiddlin' Buckaroo                    | The Fiddlin' Buckaroo                    | Maynard, Ken                       | Ken Maynard         | tt0025108 |
| 1746408459 | 1983 | 1982 | The Dorm that Dripped Blood              | The Dorm That Dripped Blood              | Obrow, Jeffrey; Carpenter, Stephen | Stephen Carpenter   | tt0082279 |
| 1746570394 | 1933 | 1933 | A Study in Scarlet                       | A Study in Scarlet                       | Marin, Edwin L.                    | Edwin L. Marin      | tt0024625 |
| 1746409244 | 1988 | 1988 | 18 Again!                                | 18 Again!                                | Flaherty, Paul                     | Paul Flaherty       | tt0094593 |
| 1746574670 | 1936 | 1936 | Beloved Enemy                            | Beloved Enemy                            | Potter, H. C.                      | H.C. Potter         | tt0027345 |
| 1746436546 | 1940 | 1940 | Charlie Chan at the Wax Museum           | Charlie Chan at the Wax Museum           | Shores, Lynn                       | Lynn Shores         | tt0032324 |
| 1745359934 | 2004 | 2004 | Anacondas: The Hunt for the Blood Orchid | Anacondas: The Hunt for the Blood Orchid | Little, Dwight                     | Dwight H. Little    | tt0366174 |
| 1746512401 | 1916 | 1916 | The Stronger Love                        | The Stronger Love                        | Lloyd, Frank                       | Frank Lloyd         | tt0007405 |
| 1746578500 | 1951 | 1951 | Cyclone Fury                             | Cyclone Fury                             | Nazarro, Ray                       | Ray Nazarro         | tt0043441 |
| 1746270332 | 1978 | 1978 | Here Come the Tigers                     | Here Come the Tigers                     | Cunningham, Sean S.                | Sean S. Cunningham  | tt0077668 |
| 1745302643 | 2005 | 2005 | The Amityville Horror                    | The Amityville Horror                    | Douglas, Andrew                    | Andrew Douglas      | tt0384806 |
| 1746393154 | 1985 | 1985 | 1918                                     | 1918                                     | Harrison, Ken                      | Ken Harrison        | tt0088645 |
| 1746497861 | 1917 | 1917 | Sold at Auction                          | Sold at Auction                          | MacDonald, Sherwood                | Sherwood MacDonald  | tt0008600 |
| 1746465195 | 1947 | 1947 | Where There's Life                       | Where There's Life                       | Lanfield, Sidney                   | Sidney Lanfield     | tt0039982 |
| 1746420889 | 1996 | 1996 | Man with a Plan                          | Man with a Plan                          | O'Brien, John                      | John O'Brien        | tt0113758 |
| 1746582390 | 1930 | 1930 | Good Intentions                          | Good Intentions                          | Howard, William K.                 | William K. Howard   | tt0020928 |
| 1746560634 | 1932 | 1932 | Her Mad Night                            | Her Mad Night                            | Hopper, E. Mason                   | E. Mason Hopper     | tt0022995 |
| 1769970174 | 1912 | 1912 | The End of the Romance                   | The End of the Romance                   |                                    | Frank Montgomery    | tt0401400 |
| 1746581737 | 1928 | 1927 | The Shield of Honor                      | The Shield of Honor                      | Johnson, Emory                     | Emory Johnson       | tt0018388 |
| 1746525043 | 1921 | 1921 | Mother Eternal                           | Mother Eternal                           | Abramson, Ivan                     | Ivan Abramson       | tt0012478 |
| 1746393362 | 1986 | 1986 | Ferris Bueller's Day Off                 | Ferris Bueller's Day Off                 | Hughes, John                       | John Hughes         | tt0091042 |
| 1746578720 | 1959 | 1959 | Al Capone                                | Al Capone                                | Wilson, Richard                    | Richard Wilson      | tt0052543 |
| 1746495624 | 1920 | 1920 | Homer Comes Home                         | Homer Comes Home                         | Storm, Jerome                      | Jerome Storm        | tt0195795 |
| 1746568174 | 1933 | 1933 | On Your Guard                            | On Your Guard                            | Crone, George                      | George Crone        | tt0187371 |
| 1746474120 | 1946 | 1946 | Lady Luck                                | Lady Luck                                | Marin, Edwin L.                    | Edwin L. Marin      | tt0038680 |
| 1746584988 | 1940 | 1940 | Road to Singapore                        | Road to Singapore                        | Schertzinger, Victor               | Victor Schertzinger | tt0032993 |
| 1746208370 | 1966 | 1966 | Beau Geste                               | Beau Geste                               | Heyes, Douglas                     | Douglas Heyes       | tt0060155 |
| 1746465033 | 1945 | 1945 | Outlaws of the Rockies                   | Outlaws of the Rockies                   | Nazarro, Ray                       | Ray Nazarro         | tt0037965 |
| 1746570138 | 1952 | 1952 | With a Song in My Heart                  | With a Song in My Heart                  | Lang, Walter                       | Walter Lang         | tt0045333 |

|            |      |      |                                     |                                     |                                 |                      |           |
|------------|------|------|-------------------------------------|-------------------------------------|---------------------------------|----------------------|-----------|
| 1746563815 | 1952 | 1952 | Boots Malone                        | Boots Malone                        | Dieterle, William               | William Dieterle     | tt0044437 |
| 1746582816 | 1935 | 1935 | Peter Ibbetson                      | Peter Ibbetson                      | Hathaway, Henry                 | Henry Hathaway       | tt0026866 |
| 1745302452 | 2006 | 2006 | The Beales of Grey Gardens          | The Beales of Grey Gardens          | Maysles, Albert; Maysles, David | Albert Maysles       | tt0839739 |
| 1746581809 | 1950 | 1950 | Snow Dog                            | Snow Dog                            | McDonald, Frank                 | Frank McDonald       | tt0042979 |
| 1746393642 | 1981 | 1981 | The Four Seasons                    | The Four Seasons                    | Alda, Alan                      | Alan Alda            | tt0082405 |
| 1746585437 | 1940 | 1940 | Marked Men                          | Marked Men                          | Scott, Sherman                  | Sam Newfield         | tt0032763 |
| 1769970697 | 1968 | 1968 | The Young Man's Bride               | The Young Man's Bride               | Gunter, George                  | George Gunter        | tt0261443 |
| 1746507880 | 1925 | 1925 | My Neighbor's Wife                  | My Neighbor's Wife                  | Geldert, Clarence               | Clarence Geldart     | tt0016135 |
| 1746583507 | 1930 | 1930 | Man to Man                          | Man to Man                          | Dwan, Allan                     | Allan Dwan           | tt0021118 |
| 1746509171 | 1924 | 1924 | Feet of Clay                        | Feet of Clay                        | De Mille, Cecil B.              | Cecil B. DeMille     | tt0014881 |
| 1746563364 | 1952 | 1953 | A Virgin in Hollywood               | A Virgin in Hollywood               | Kirby, Klaytan W.               | Klaytan W. Kirby     | tt0129544 |
| 1746580643 | 1935 | 1935 | Timber Terrors                      | Timber Terrors                      | Emmett, Robert                  | Robert Emmett Tansey | tt0027108 |
| 1746465330 | 1947 | 1947 | Bowery Buckaroos                    | Bowery Buckaroos                    | Beaudine, William               | William Beaudine     | tt0039216 |
| 1746583814 | 1929 | 1929 | Queen of the Night Clubs            | Queen of the Night Clubs            | Foy, Bryan                      | Bryan Foy            | tt0020299 |
| 1746423468 | 1996 | 1996 | Eye for an Eye                      | Eye for an Eye                      | Schlesinger, John               | John Schlesinger     | tt0116260 |
| 1746555965 | 1956 | 1956 | Hot Shots                           | Hot Shots                           | Yarbrough, Jean                 | Jean Yarbrough       | tt0049336 |
| 1746561784 | 1957 | 1956 | Beyond Mombasa                      | Beyond Mombasa                      | Marshall, George                | George Marshall      | tt0049005 |
| 1746453775 | 1944 | 1944 | Carolina Blues                      | Carolina Blues                      | Jason, Leigh                    | Leigh Jason          | tt0036698 |
| 1746454875 | 1994 | 1994 | PCU                                 | PCU                                 | Bochner, Hart                   | Hart Bochner         | tt0110759 |
| 1746582051 | 1950 | 1950 | Riding High                         | Riding High                         | Capra, Frank                    | Frank Capra          | tt0042893 |
| 1746570461 | 1934 | 1934 | Death on the Diamond                | Death on the Diamond                | Sedgwick, Edward                | Edward Sedgwick      | tt0025039 |
| 1746465200 | 1944 | 1944 | Pin Up Girl                         | Pin Up Girl                         | Humberstone, Bruce              | H. Bruce Humberstone | tt0037175 |
| 1746573766 | 1958 | 1958 | Girl with an Itch                   | Girl with an Itch                   | Ashcroft, Ronnie                | Ronald V. Ashcroft   | tt0160310 |
| 1746454997 | 1996 | 1995 | Heavy                               | Heavy                               | Mangold, James                  | James Mangold        | tt0113280 |
| 1746584255 | 1939 | 1939 | The Day the Bookies Wept            | The Day the Bookies Wept            | Goodwins, Leslie                | Leslie Goodwins      | tt0031214 |
| 1746440252 | 1996 | 1996 | The Arrival                         | The Arrival                         | Twohy, David                    | David Twohy          | tt0115571 |
| 1745375293 | 2008 | 2008 | Zack and Miri Make a Porno          | Zack and Miri Make a Porno          | Smith, Kevin                    | Kevin Smith          | tt1007028 |
| 1746499862 | 1949 | 1949 | Impact                              | Impact                              | Lubin, Arthur                   | Arthur Lubin         | tt0041503 |
| 1746501897 | 1910 | 1910 | A Postal Substitute                 | A Postal Substitute                 |                                 | William F. Haddock   | tt2236946 |
| 1746577200 | 1951 | 1951 | The Racket                          | The Racket                          |                                 | John Cromwell        | tt0043955 |
| 1746423372 | 1999 | 1999 | Terror Firmer                       | Terror Firmer                       | Cromwell, John                  | John Cromwell        | tt0169299 |
| 1745342931 | 2008 | 2008 | Expelled: No Intelligence Allowed   | Expelled: No Intelligence Allowed   | Kaufman, Lloyd                  | Lloyd Kaufman        | tt1091617 |
| 1746497640 | 1919 | 1919 | What Every Woman Learns             | What Every Woman Learns             | Frankowski, Nathan              | Nathan Frankowski    | tt0010869 |
| 1746583144 | 1939 | 1939 | All Women Have Secrets              | All Women Have Secrets              | Niblo, Fred                     | Fred Niblo           | tt0031031 |
| 1746523056 | 1927 | 1927 | Hands Off                           | Hands Off                           | Neumann, Kurt                   | Kurt Neumann         | tt0017959 |
| 1746503682 | 1922 | 1921 | The Kingfisher's Roost              | KingFisher's Roost                  | Laemmle, Ernst                  | Ernst Laemmle        | tt0013294 |
| 1746509010 | 1924 | 1924 | The Heritage of the Desert          | The Heritage of the Desert          | Chaudet, Louis; Hurst, Paul     | Louis Chaudet        | tt0014984 |
| 1746569728 | 1958 | 1957 | Lost Lagoon                         | Lost Lagoon                         | Willat, Irvin                   | Irvin Willat         | tt0051880 |
| 1746410416 | 1990 | 1990 | Gremlins 2: The New Batch           | Gremlins 2: The New Batch           | Rawlins, John                   | John Rawlins         | tt0099700 |
| 1746509265 | 1924 | 1924 | Why Men Leave Home                  | Why Men Leave Home                  | Dante, Joe                      | Joe Dante            | tt0015497 |
| 1746474966 | 1946 | 1946 | Monsieur Beaucaire                  | Monsieur Beaucaire                  | Stahl, John M.                  | John M. Stahl        | tt0038747 |
| 1746520244 | 1949 | 1949 | Hellfire                            | Hellfire                            | Marshall, George                | George Marshall      | tt0041453 |
| 1746499841 | 1947 | 1947 | Hit Parade of 1947                  | Hit Parade of 1947                  | Springsteen, R. G.              | R.G. Springsteen     | tt0039465 |
| 1746208259 | 1969 | 1969 | Me and My Brother                   | Me and My Brother                   | McDonald, Frank                 | Frank McDonald       | tt0063286 |
| 1746437428 | 1942 | 1942 | Wildcat                             | Wildcat                             | Frank, Robert                   | Robert Frank         | tt0035562 |
| 1746577145 | 1962 | 1962 | Lonely Are the Brave                | Lonely Are the Brave                | McDonald, Frank                 | Frank McDonald       | tt0056195 |
| 1745309532 | 2005 | 2005 | Hitch                               | Hitch                               | Miller, David                   | David Miller         | tt0386588 |
| 1746555741 | 1955 | 1955 | I'll Cry Tomorrow                   | I'll Cry Tomorrow                   | Tennant, Andy                   | Andy Tennant         | tt0048191 |
| 1746524857 | 1916 | 1916 | Purity                              | Purity                              | Mann, Daniel                    | Daniel Mann          | tt0007229 |
| 1746500456 | 1925 | 1925 | New Champion                        | The New Champion                    | Berger, Rea                     | Rae Berger           | tt0016152 |
| 1746473937 | 1945 | 1945 | Dangerous Partners                  | Dangerous Partners                  | Eason, Reeves                   | B. Reeves Eason      | tt0037634 |
| 1746520806 | 1925 | 1925 | Range Justice                       | Range Justice                       | Cahn, Edward L.                 | Edward L. Cahn       | tt0016262 |
| 1746496117 | 1917 | 1917 | The Penny Philanthropist            | The Penny Philanthropist            | Hayes, Ward                     | Ward Hayes           | tt0181762 |
| 1746574046 | 1959 | 1959 | Odds Against Tomorrow               | Odds Against Tomorrow               | McConnell, Guy                  | Guy McConnell        | tt0053133 |
| 1746554726 | 1965 | 1965 | Dr. Goldfoot and the Bikini Machine | Dr. Goldfoot and the Bikini Machine | Wise, Robert                    | Robert Wise          | tt0059124 |
| 1746582853 | 1935 | 1935 | Five Bad Men                        | Five Bad Men                        | Taurog, Norman                  | Norman Taurog        | tt0206751 |
| 1746520268 | 1926 | 1926 | The Social Highwayman               | The Social Highwayman               | Smith, Cliff                    | Clifford Smith       | tt0017412 |
|            |      |      |                                     |                                     | Beaudine, William               | William Beaudine     |           |

|             |      |      |                                      |                                      |                                       |                      |           |
|-------------|------|------|--------------------------------------|--------------------------------------|---------------------------------------|----------------------|-----------|
| 1746453819  | 1940 | 1940 | The Showdown                         | The Showdown                         | Bretherton, Howard                    | Howard Bretherton    | tt0033047 |
| 1745372902  | 2004 | 2004 | Walking Tall                         | Walking Tall                         | Bray, Kevin                           | Kevin Bray           | tt0351977 |
| 1746574697  | 1933 | 1933 | Hallelujah I'm a Bum                 | Hallelujah I'm a Bum                 | Milestone, Lewis                      | Lewis Milestone      | tt0024083 |
| 1746583945  | 1929 | 1929 | Married in Hollywood                 | Married in Hollywood                 | Silver, Marcel                        | Marcel Silver        | tt0020147 |
| 1746410874  | 1993 | 1993 | Wrestling Ernest Hemingway           | Wrestling Ernest Hemingway           | Haines, Randa                         | Randa Haines         | tt0108596 |
| 1746485154  | 1919 | 1919 | Heads Win                            | Heads Win                            | Kendall, Preston                      | Preston Kendall      | tt0010224 |
| 1746424620  | 1941 | 1941 | Federal Fugitives                    | Federal Fugitives                    | Beaudine, William                     | William Beaudine     | tt0033595 |
| 1746503762  | 1921 | 1921 | The Sheik                            | The Sheik                            | Melford, George                       | George Melford       | tt0012675 |
| 1746576996  | 1958 | 1959 | The Mating Urge                      | The Mating Urge                      |                                       |                      | tt0272722 |
| 1746496805  | 1919 | 1919 | Taxi                                 | Taxi                                 | Windom, Lawrence                      | Lawrence C. Windom   | tt0194434 |
| 1746421591  | 1992 | 1992 | Encino Man                           | Encino Man                           | Mayfield, Les                         | Les Mayfield         | tt0104187 |
| 1746475986  | 1944 | 1944 | Bowery Champs                        | Bowery Champs                        | Beaudine, William                     | William Beaudine     | tt0036667 |
| 1746410715  | 1994 | 1994 | Silent Fall                          | Silent Fall                          | Beresford, Bruce                      | Bruce Beresford      | tt0111187 |
| 1746577300  | 1960 | 1960 | Ten Who Dared                        | Ten Who Dared                        | Beaudine, William                     | William Beaudine     | tt0054372 |
| 1745341767  | 2003 | 2003 | A Man Apart                          | A Man Apart                          | Gray, F. Gary                         | F. Gary Gray         | tt0266465 |
| 1769969343  | 1931 | 1931 | A Burglar to the Rescue              | A Burglar to the Rescue              | Cochrane, George                      | George Cochrane      | tt0174527 |
| 1745372344  | 2009 | 2009 | Post Grad                            | Post Grad                            | Jenson, Vicky                         | Vicky Jenson         | tt1142433 |
| 1746509327  | 1925 | 1925 | Pretty Ladies                        | Pretty Ladies                        | Bell, Monta                           | Monta Bell           | tt0016241 |
| 1746516139  | 1920 | 1920 | The Love Flower                      | The Love Flower                      | Griffith, D. W.                       | D.W. Griffith        | tt0011415 |
| 1746523317  | 1913 | 1913 | Checkers                             | Checkers                             | Thomas, Augustus                      | Augustus E. Thomas   | tt0002746 |
| 1746497050  | 1917 | 1917 | The Greater Woman                    | The Greater Woman                    | Powell, Frank                         | Frank Powell         | tt0006741 |
| 1769970844  | 1915 | 1915 | The Hunt                             | The Taunt                            | Sterling, Ford; Parrott, Charles      | Edward Sloman        | tt0463221 |
| 1746422733  | 1940 | 1940 | Seventeen                            | Seventeen                            | King, Louis                           | Louis King           | tt0033039 |
| 1746576994  | 1961 | 1961 | Marines, Let's Go!                   | Marines, Let's Go                    | Walsh, Raoul                          | Raoul Walsh          | tt0055144 |
| 1746420960  | 1994 | 1994 | Love and a .45                       | Love and a .45                       | Talkington, C. M.                     | C.M. Talkington      | tt0110395 |
| 1746584012  | 1935 | 1935 | Justice of the Range                 | Justice of the Range                 | Selman, David                         | David Selman         | tt0026555 |
| 1746571573  | 1932 | 1932 | End of the Trail                     | End of the Trail                     | Lederman, D. Ross                     | D. Ross Lederman     | tt0022856 |
| 1746465111  | 1944 | 1944 | Sing a Jingle                        | Sing a Jingle                        | Lilley, Edward                        | Edward C. Lilley     | tt0036358 |
| 1746410388  | 1992 | 1992 | Brain Donors                         | Brain Donors                         | Dugan, Dennis                         | Dennis Dugan         | tt0103872 |
| 1746409693  | 1991 | 1991 | The Commitments                      | The Commitments                      | Parker, Alan                          | Alan Parker          | tt0101605 |
| 1746562130  | 1954 | 1954 | The Shanghai Story                   | The Shanghai Story                   | Lloyd, Frank                          | Frank Lloyd          | tt0047475 |
| 1746454370  | 1941 | 1941 | Tarzan's Secret Treasure             | Tarzan's Secret Treasure             | Thorpe, Richard                       | Richard Thorpe       | tt0034266 |
| 1746585094  | 1930 | 1930 | The Squealer                         | The Squealer                         | Brown, Harry J.                       | Harry Joe Brown      | tt0021416 |
| 1745340484  | 2003 | 2002 | XX/XY                                | XX/XY                                | Chick, Austin                         | Austin Chick         | tt0245573 |
| 1746584161  | 1937 | 1937 | The Awful Truth                      | The Awful Truth                      | McCarey, Leo                          | Leo McCarey          | tt0028597 |
| 1746533200  | 1915 | 1915 | The Fairy and the Waif               | The Fairy and the Waif               | Irving, George; Frohman, Marie Hubert | Marie Hubert Frohman | tt0005298 |
| 1746570433  | 1933 | 1933 | By Candlelight                       | By Candlelight                       | Whale, James; Wylor, Robert           | James Whale          | tt0023860 |
| 1746574298  | 1950 | 1950 | Mule Train                           | Mule Train                           | English, John                         | John English         | tt0042761 |
| 1746435105  | 1941 | 1941 | Ellery Queen's Penthouse Mystery     | Ellery Queen's Penthouse Mystery     | Hogan, James                          | James P. Hogan       | tt0033574 |
| 1746582482  | 1935 | 1935 | The Affair of Susan                  | The Affair of Susan                  | Neumann, Kurt                         | Kurt Neumann         | tt0026041 |
| 1746573990  | 1956 | 1956 | The Werewolf                         | The Werewolf                         | Sears, Fred F.                        | Fred F. Sears        | tt0049944 |
| 1769970421  | 1965 | 1965 | The Smut Peddler                     | The Smut Peddler                     | Rose, Warner                          | William Rose         | tt0242893 |
| 1745282798  | 2006 | 2006 | The Wicker Man                       | The Wicker Man                       | LaBute, Neil                          | Neil LaBute          | tt0450345 |
| 1746436126  | 1942 | 1942 | Rubber Racketeers                    | Rubber Racketeers                    | Young, Harold                         | Harold Young         | tt0035273 |
| 1746520988  | 1949 | 1949 | Haunted Trails                       | Haunted Trails                       | Hillyer, Lambert                      | Lambert Hillyer      | tt0041448 |
| 1746409310  | 1984 | 1984 | They're Playing With Fire            | They're Playing with Fire            | Avedis, Howard                        | Howard Avedis        | tt0088255 |
| 1746561178  | 1932 | 1932 | The World and the Flesh              | World and the Flesh                  | Cromwell, John                        | John Cromwell        | tt0023709 |
| 1746570854  | 1934 | 1934 | Long Lost Father                     | Long Lost Father                     | Schoedsack, Ernest B.                 | Ernest B. Schoedsack | tt0025417 |
| 1745271727  | 2001 | 2001 | The Anniversary Party                | The Anniversary Party                | Leigh, Jennifer Jason; Cumming, Alar  | Alan Cumming         | tt0254099 |
| 1746577898  | 1939 | 1939 | Dark Victory                         | Dark Victory                         | Goulding, Edmund                      | Edmund Goulding      | tt0031210 |
| 1746257245  | 1980 | 1980 | Urban Cowboy                         | Urban Cowboy                         | Bridges, James                        | James Bridges        | tt0081696 |
| 1746454710  | 1995 | 1995 | Nick of Time                         | Nick of Time                         | Badham, John                          | John Badham          | tt0113972 |
| 1746580374  | 1935 | 1935 | The Public Menace                    | The Public Menace                    | Kenton, Erle C.                       | Erle C. Kenton       | tt0026897 |
| 17464545214 | 1940 | 1940 | Sailor's Lady                        | Sailor's Lady                        | Dwan, Allan                           | Allan Dwan           | tt0033011 |
| 1746455135  | 1999 | 1999 | The Bone Collector                   | The Bone Collector                   | Noyce, Phillip                        | Phillip Noyce        | tt0145681 |
| 1746420866  | 1990 | 1990 | Listen Up: The Lives of Quincy Jones | Listen Up: The Lives of Quincy Jones | Weissbrod, Ellen                      | Ellen Weissbrod      | tt0102315 |
| 1746410712  | 1991 | 1991 | Don't Tell Mom the Babysitter's Dead | Don't Tell Mom the Babysitter's Dead | Herek, Stephen                        | Stephen Herek        | tt0101757 |

|            |      |      |                                       |                                       |                                       |                                     |           |
|------------|------|------|---------------------------------------|---------------------------------------|---------------------------------------|-------------------------------------|-----------|
| 1746500083 | 1946 | 1946 | The Bamboo Blonde                     | The Bamboo Blonde                     | Mann, Anthony                         | Anthony Mann                        | tt0038324 |
| 1746421320 | 1994 | 1994 | Camp Nowhere                          | Camp Nowhere                          | Prince, Jonathan                      | Jonathan Prince                     | tt0109369 |
| 1746524747 | 1910 | 1910 | Speed Versus Death                    | Speed Versus Death                    |                                       | William F. Haddock                  | tt2239144 |
| 1746554974 | 1965 | 1965 | Deadwood '76                          | Deadwood '76                          | Landis, James                         | James Landis                        | tt0059093 |
| 1746577846 | 1938 | 1938 | Rhythm of the Saddle                  | Rhythm of the Saddle                  | Sherman, George                       | George Sherman                      | tt0030678 |
| 1746580908 | 1938 | 1938 | Gangs of New York                     | Gangs of New York                     | Cruze, James                          | James Cruze                         | tt0030169 |
| 1746454965 | 1942 | 1942 | Outlaws of Pine Ridge                 | Outlaws of Pine Ridge                 | Witney, William                       | William Witney                      | tt0035163 |
| 1746409311 | 1987 | 1987 | Broadcast News                        | Broadcast News                        | Brooks, James L.                      | James L. Brooks                     | tt0092699 |
| 1746576976 | 1951 | 1951 | Disc Jockey                           | Disc Jockey                           | Jason, Will                           | Will Jason                          | tt0133713 |
| 1746498323 | 1921 | 1921 | Tuning Up                             | Tuning Up                             | Smith, Hamilton                       | Hamilton Smith                      | tt1669255 |
| 1746569995 | 1958 | 1958 | Gunsmoke in Tucson                    | Gunsmoke in Tucson                    | Carr, Thomas                          | Thomas Carr                         | tt0051691 |
| 1746211072 | 1973 | 1973 | Five on the Black Hand Side           | Five on the Black Hand Side           | Williams, Oscar                       | Oscar Williams                      | tt0070063 |
| 1746500418 | 1925 | 1925 | A Daughter of the Sioux               | A Daughter of the Sioux               | Wilson, Ben                           | Ben F. Wilson                       | tt0015738 |
| 1746514620 | 1923 | 1923 | The Spider and the Rose               | The Spider and the Rose               | McDermott, John                       | John McDermott                      | tt0014502 |
| 1746504354 | 1922 | 1922 | Smiling Jim                           | Smiling Jim                           | Franz, Joseph                         | Joseph Franz                        | tt0013612 |
| 1746580588 | 1935 | 1935 | Legong (Dance of the Virgins)         | Legong: Dance of the Virgins          | Falaise, Henri de la                  | Henri de la Falaise                 | tt0129196 |
| 1746574636 | 1936 | 1936 | Avenging Waters                       | Avenging Waters                       | Bennet, Spencer Gordon                | Spencer Gordon Bennet               | tt0027322 |
| 1746249073 | 1975 | 1974 | The Life and Times of Grizzly Adams   | The Life and Times of Grizzly Adams   | Friedenberg, Richard                  | Richard Friedenberg                 | tt0074797 |
| 1746453575 | 1941 | 1941 | Sundown                               | Sundown                               | Hathaway, Henry                       | Henry Hathaway                      | tt0034242 |
| 1746491867 | 1948 | 1948 | The Sainted Sisters                   | The Sainted Sisters                   | Russell, William D.                   | William D. Russell                  | tt0040754 |
| 1745339962 | 2002 | 2001 | No Such Thing                         | No Such Thing                         | Hartley, Hal                          | Hal Hartley                         | tt0248190 |
| 1746435697 | 1941 | 1941 | South of Tahiti                       | South of Tahiti                       | Waggner, George                       | George Waggner                      | tt0034222 |
| 1745293626 | 2006 | 2006 | Keeping Up with the Steins            | Keeping Up with the Steins            | Marshall, Scott                       | Scott Marshall                      | tt0415949 |
| 1746439453 | 1998 | 1998 | The Parent Trap                       | The Parent Trap                       | Meyers, Nancy                         | Nancy Meyers                        | tt0120783 |
| 1746419926 | 1986 | 1986 | Flight of the Navigator               | Flight of the Navigator               | Kleiser, Randal                       | Randal Kleiser                      | tt0091059 |
| 1746570360 | 1934 | 1934 | Whom the Gods Destroy                 | Whom the Gods Destroy                 | Lang, Walter                          | Walter Lang                         | tt0025987 |
| 1746474539 | 1944 | 1944 | Reckless Age                          | Reckless Age                          | Feist, Felix E.                       | Felix E. Feist                      | tt0037214 |
| 1746583109 | 1939 | 1939 | Chicken Wagon Family                  | Chicken Wagon Family                  | Leeds, Herbert I.                     | Herbert I. Leeds                    | tt0031154 |
| 1746500883 | 1910 | 1910 | Pals of the Range                     | Pals of the Range                     |                                       | Gilbert M. 'Broncho Billy' Anderson | tt0001354 |
| 1746530757 | 1948 | 1948 | Gun Smugglers                         | Gun Smugglers                         | McDonald, Frank                       | Frank McDonald                      | tt0040409 |
| 1746550131 | 1954 | 1954 | The Desperado                         | The Desperado                         | Carr, Thomas                          | Thomas Carr                         | tt0046905 |
| 1746235282 | 1976 | 1976 | I Will...I Will...For Now             | I Will... I Will... For Now           | Panama, Norman                        | Norman Panama                       | tt0074659 |
| 1746491703 | 1944 | 1944 | Vigilantes of Dodge City              | Vigilantes of Dodge City              | Grissell, Wallace                     | Wallace Grissell                    | tt0037433 |
| 1746575029 | 1933 | 1933 | Matto-Grosso                          | Matto Grosso                          | Clarke, John S.; Crosby, Floyd; Newel | John S. Clark Jr.                   | tt0024312 |
| 1746474823 | 1947 | 1947 | Devil Ship                            | Devil Ship                            | Landers, Lew                          | Lew Landers                         | tt0039316 |
| 1746436085 | 1943 | 1943 | Follow the Band                       | Follow the Band                       | Yarbrough, Jean                       | Jean Yarbrough                      | tt0035894 |
| 1745271956 | 2001 | 2001 | Harry Potter and the Sorcerer's Stone | Harry Potter and the Sorcerer's Stone | Columbus, Chris                       | Chris Columbus                      | tt0241527 |
| 1746581470 | 1951 | 1951 | Tomorrow Is Another Day               | Tomorrow Is Another Day               | Feist, Felix                          | Felix E. Feist                      | tt0044136 |
| 1746273854 | 1980 | 1980 | Divine Madness                        | Divine Madness                        | Ritchie, Michael                      | Michael Ritchie                     | tt0080634 |
| 1746575014 | 1938 | 1938 | The Crowd Roars                       | The Crowd Roars                       | Thorpe, Richard                       | Richard Thorpe                      | tt0030031 |
| 1746424202 | 1940 | 1940 | Sky Murder                            | Sky Murder                            | Seitz, George B.                      | George B. Seitz                     | tt0033059 |
| 1746581860 | 1950 | 1950 | South Sea Sinner                      | South Sea Sinner                      | Humberstone, Bruce                    | H. Bruce Humberstone                | tt0041904 |
| 1746566257 | 1954 | 1954 | Them!                                 | Them!                                 | Douglas, Gordon                       | Gordon Douglas                      | tt0047573 |
| 1746508984 | 1926 | 1926 | Going Crooked                         | Going Crooked                         | Melford, George                       | George Melford                      | tt0016927 |
| 1746581654 | 1928 | 1928 | South of Panama                       | South of Panama                       | Hunt, Charles J.                      | Charles J. Hunt                     | tt0165954 |
| 1746503801 | 1919 | 1919 | The Unwritten Code                    | The Unwritten Code                    | Durning, Bernard J.                   | Bernard J. Durning                  | tt0010827 |
| 1746514887 | 1923 | 1923 | Forbidden Lover                       | Forbidden Lover                       | Deverich, Nat                         | Nat G. Deverich                     | tt0014055 |
| 1746465181 | 1942 | 1943 | Keeper of the Flame                   | Keeper of the Flame                   | Cukor, George                         | George Cukor                        | tt0034936 |
| 1746573572 | 1910 | 1910 | Dora Thorne                           | Dora Thorne                           |                                       |                                     | tt0221130 |
| 1746570756 | 1952 | 1952 | Apache Country                        | Apache Country                        | Archainbaud, George                   | George Archainbaud                  | tt0044367 |
| 1746499980 | 1924 | 1924 | Dorothy Vernon of Haddon Hall         | Dorothy Vernon of Haddon Hall         | Neilan, Marshall                      | Marshall Neilan                     | tt0014854 |
| 1746580827 | 1935 | 1935 | China Seas                            | China Seas                            | Garnett, Tay                          | Tay Garnett                         | tt0026205 |
| 1746581603 | 1928 | 1928 | State Street Sadie                    | State Street Sadie                    | Mayo, Archie                          | Archie Mayo                         | tt0166822 |
| 1746437025 | 1940 | 1940 | The Mummy's Hand                      | The Mummy's Hand                      | Cabanne, Christy                      | Christy Cabanne                     | tt0032818 |
| 1746465309 | 1947 | 1947 | Stork Bites Man                       | Stork Bites Man                       | Endfield, Cyril                       | Cy Endfield                         | tt0039869 |
| 1746566857 | 1933 | 1933 | Girl Missing                          | Girl Missing                          | Florey, Robert                        | Robert Florey                       | tt0024062 |
| 1746580754 | 1937 | 1937 | She Asked for It                      | She Asked for It                      | Kenton, Erle C.                       | Erle C. Kenton                      | tt0029547 |

|            |      |      |                                     |                                     |                                    |                    |           |
|------------|------|------|-------------------------------------|-------------------------------------|------------------------------------|--------------------|-----------|
| 1746492441 | 1947 | 1947 | West of Dodge City                  | West of Dodge City                  | Nazarro, Ray                       | Ray Nazarro        | tt0039978 |
| 1746465152 | 1947 | 1947 | Banjo                               | Banjo                               | Fleischer, Richard O.              | Richard Fleischer  | tt0039174 |
| 1746486293 | 1917 | 1917 | Mr. Opp                             | Mr. Opp                             | Reynolds, Lynn F.                  | Lynn Reynolds      | tt0008333 |
| 1746491803 | 1948 | 1948 | Every Girl Should Be Married        | Every Girl Should Be Married        | Hartman, Don                       | Don Hartman        | tt0040331 |
| 1746569511 | 1954 | 1954 | Cannibal Attack                     | Cannibal Attack                     | Sholem, Lee                        | Lee Sholem         | tt0046822 |
| 1746584828 | 1929 | 1929 | The Madonna of Avenue A             | Madonna of Avenue A                 | Curtiz, Michael                    | Michael Curtiz     | tt0020128 |
| 1746580437 | 1938 | 1938 | Romance on the Run                  | Romance on the Run                  | Meins, Gus                         | Gus Meins          | tt0030694 |
| 1746233035 | 1967 | 1967 | The Cool Ones                       | The Cool Ones                       | Nelson, Gene                       | Gene Nelson        | tt0061514 |
| 1746566882 | 1932 | 1932 | Skyscraper Souls                    | Skyscraper Souls                    | Selwyn, Edgar                      | Edgar Selwyn       | tt0023486 |
| 1746524838 | 1923 | 1923 | Jamestown                           | Jamestown                           | Hollywood, Edwin L.                | Edwin L. Hollywood | tt0135479 |
| 1746577199 | 1959 | 1959 | The Shaggy Dog                      | The Shaggy Dog                      | Barton, Charles                    | Charles Barton     | tt0053271 |
| 1746420874 | 1993 | 1993 | Mrs. Doubtfire                      | Mrs. Doubtfire                      | Columbus, Chris                    | Chris Columbus     | tt0107614 |
| 1746513718 | 1928 | 1928 | Lights of New York                  | Lights of New York                  | Foy, Bryan                         | Bryan Foy          | tt0019096 |
| 1746182746 | 1910 | 1910 | The Broken Doll                     | The Broken Doll                     | Griffith, D. W.                    | D.W. Griffith      | tt0001135 |
| 1746502001 | 1915 | 1915 | The Flaming Sword                   | The Flaming Sword                   | Middleton, E.                      | Edwin Middleton    | tt0005330 |
| 1746421192 | 1999 | 1999 | Drive Me Crazy                      | Drive Me Crazy                      | Schultz, John                      | John Schultz       | tt0164114 |
| 1746584160 | 1936 | 1936 | Fatal Lady                          | Fatal Lady                          | Ludwig, Edward                     | Edward Ludwig      | tt0027611 |
| 1746455274 | 1998 | 1998 | Playing by Heart                    | Playing by Heart                    | Carroll, Willard                   | Willard Carroll    | tt0145734 |
| 1746583802 | 1930 | 1930 | The Silver Horde                    | The Silver Horde                    | Archainbaud, George                | George Archainbaud | tt0021374 |
| 1746512750 | 1916 | 1916 | Sudden Riches                       | Sudden Riches                       | Chautard, Emile                    | Emile Chautard     | tt0007406 |
| 1746508136 | 1926 | 1926 | Her Honor the Governor              | Her Honor, the Governor             | Withey, Chet                       | Chester Withey     | tt0016958 |
| 1746514072 | 1915 | 1915 | The Vampire                         | The Vampire                         | Blaché, Alice                      | Alice Guy          | tt0146338 |
| 1746584947 | 1940 | 1940 | Ride, Tenderfoot, Ride              | Ride, Tenderfoot, Ride              | McDonald, Frank                    | Frank McDonald     | tt0032987 |
| 1746585048 | 1939 | 1939 | Society Smugglers                   | Society Smugglers                   | May, Joe                           | Joe May            | tt0031947 |
| 1746436534 | 1943 | 1943 | O, My Darling Clementine            | O, My Darling Clementine            | McDonald, Frank                    | Frank McDonald     | tt0036226 |
| 1746569660 | 1953 | 1953 | Winning of the West                 | Winning of the West                 | Archainbaud, George                | George Archainbaud | tt0046553 |
| 1746219422 | 1976 | 1976 | Freewheelin'                        | Freewheelin'                        | Dittrich, Scott                    | Scott Dittrich     | tt0198494 |
| 1746475928 | 1947 | 1946 | Till the Clouds Roll By             | Till the Clouds Roll By             | Whorf, Richard                     | Richard Whorf      | tt0039035 |
| 1745395411 | 2010 | 2010 | Shutter Island                      | Shutter Island                      | Scorsese, Martin                   | Martin Scorsese    | tt1130884 |
| 1746200480 | 1968 | 1968 | Firecreek                           | Firecreek                           | McEveety, Vincent                  | Vincent McEveety   | tt0062975 |
| 1746453794 | 1944 | 1944 | Hail the Conquering Hero            | Hail the Conquering Hero            | Sturges, Preston                   | Preston Sturges    | tt0036891 |
| 1746393094 | 1982 | 1982 | The Last American Virgin            | The Last American Virgin            | Davidson, Boaz                     | Boaz Davidson      | tt0084234 |
| 1746584268 | 1939 | 1939 | Spirit of Culver                    | The Spirit of Culver                | Santley, Joseph                    | Joseph Santley     | tt0031962 |
| 1769970437 | 1965 | 1965 | The Sexperts--Touched by Temptation | The Sexperts: Touched by Temptation | Nehemiah, J.                       | Jerald Intrator    | tt0183762 |
| 1746497452 | 1920 | 1920 | Someone in the House                | Someone in the House                | Ince, John E.                      | John Ince          | tt0197902 |
| 1746408442 | 1982 | 1982 | It Came from Hollywood              | It Came from Hollywood              | Solt, Andrew; Leo, Malcolm         | Malcolm Leo        | tt0084156 |
| 1746512916 | 1915 | 1915 | The Eagle's Nest                    | The Eagle's Nest                    | Fielding, Romaine                  | Edwin Arden        | tt0005233 |
| 1746520039 | 1925 | 1925 | All Around Frying Pan               | All Around Frying Pan               |                                    | David Kirkland     | tt0015565 |
| 1746410435 | 1986 | 1985 | Sherman's March                     | Sherman's March                     |                                    | Ross McElwee       | tt0091943 |
| 1746583257 | 1931 | 1931 | The Criminal Code                   | The Criminal Code                   | Hawks, Howard                      | Howard Hawks       | tt0021770 |
| 1746582523 | 1938 | 1938 | His Exciting Night                  | His Exciting Night                  | Meins, Gus                         | Gus Meins          | tt0030236 |
| 1746513693 | 1923 | 1923 | Salome                              | Salome                              | Strauss, Malcolm                   | Malcolm Strauss    | tt0161953 |
| 1769970171 | 1912 | 1912 | Their First Kidnapping Case         | Their First Kidnapping Case         |                                    | Mack Sennett       | tt0229772 |
| 1746533052 | 1914 | 1914 | The Ghost Breaker                   | The Ghost Breaker                   | DeMille, Cecil B.; Apfel, Oscar C. | Oscar Apfel        | tt0004013 |
| 1746438290 | 1940 | 1940 | Sandy Gets Her Man                  | Sandy Gets Her Man                  | Garrett, Otis; Smith, Paul Gerard  | Otis Garrett       | tt0033018 |
| 1746199207 | 1969 | 1969 | The Good Guys and the Bad Guys      | The Good Guys and the Bad Guys      | Kennedy, Burt                      | Burt Kennedy       | tt0064379 |
| 1746513668 | 1915 | 1915 | The Girl I Left Behind Me           | The Girl I Left Behind Me           | Carleton, Lloyd B.                 | Lloyd B. Carleton  | tt0005387 |
| 1746492451 | 1944 | 1944 | Two Girls and a Sailor              | Two Girls and a Sailor              | Thorpe, Richard                    | Richard Thorpe     | tt0037408 |
| 1745272582 | 2000 | 2000 | The Perfect Storm                   | The Perfect Storm                   | Petersen, Wolfgang                 | Wolfgang Petersen  | tt0177971 |
| 1746580752 | 1936 | 1936 | The Traitor                         | The Traitor                         | Newfield, Sam                      | Sam Newfield       | tt0028404 |
| 1746577293 | 1951 | 1951 | Darling, How Could You!             | Darling, How Could You!             | Leisen, Mitchell                   | Mitchell Leisen    | tt0043454 |
| 1746583812 | 1928 | 1928 | Wild West Romance                   | Wild West Romance                   | Hough, R. Lee                      | R.L. Hough         | tt0019581 |
| 1746569502 | 1958 | 1958 | Maracaibo                           | Maracaibo                           | Wilde, Cornel                      | Cornel Wilde       | tt0051907 |
| 1746467148 | 1917 | 1917 | Sins of Ambition                    | Sins of Ambition                    | Abramson, Ivan                     | Ivan Abramson      | tt0008577 |
| 1746582607 | 1935 | 1935 | The Case of the Curious Bride       | The Case of the Curious Bride       | Curtiz, Michael                    | Michael Curtiz     | tt0026184 |
| 1746508937 | 1925 | 1925 | The Freshman                        | The Freshman                        | Taylor, Sam; Newmeyer, Fred        | Fred C. Newmeyer   | tt0015841 |
| 1746513038 | 1915 | 1915 | A Black Sheep                       | A Black Sheep                       | Heffron, Thomas N.                 | Thomas N. Heffron  | tt0004977 |

|            |      |      |                             |                             |                                     |                        |           |
|------------|------|------|-----------------------------|-----------------------------|-------------------------------------|------------------------|-----------|
| 1746520307 | 1925 | 1925 | The White Outlaw            | The White Outlaw            | Smith, Clifford                     | Clifford Smith         | tt0016526 |
| 1746473724 | 1942 | 1942 | A Night to Remember         | A Night to Remember         | Wallace, Richard                    | Richard Wallace        | tt0036203 |
| 1745359169 | 2010 | 2010 | The Bounty Hunter           | The Bounty Hunter           | Tennant, Andy                       | Andy Tennant           | tt1038919 |
| 1746567009 | 1933 | 1933 | The Past of Mary Holmes     | The Past of Mary Holmes     | Thompson, Harlan                    | Harlan Thompson        | tt0024431 |
| 1746583848 | 1928 | 1928 | Burning Daylight            | Burning Daylight            | Brabin, Charles J.                  | Charles Brabin         | tt0018733 |
| 1746560103 | 1963 | 1963 | In the French Style         | In the French Style         | Parrish, Robert                     | Robert Parrish         | tt0056096 |
| 1769976705 | 1929 | 1929 | Frontier Romance            | Frontier Romance            | Clifton, Elmer                      | Elmer Clifton          | tt1049075 |
| 1746582003 | 1928 | 1928 | See You Later               | See You Later               | Yaconelli, Frank                    | Frank Yaconelli        | tt0019365 |
| 1745309118 | 2005 | 2005 | Rock School                 | Rock School                 | Argott, Don                         | Don Argott             | tt0436727 |
| 1746453799 | 1944 | 1944 | Goin' to Town               | Goin' to Town               | Goodwins, Leslie                    | Leslie Goodwins        | tt0036871 |
| 1746560060 | 1964 | 1964 | The Inheritance             | The Inheritance             | Mayer, Harold                       | Harold Mayer           | tt0357795 |
| 1746492213 | 1948 | 1948 | Secret Service Investigator | Secret Service Investigator | Springsteen, R. G.                  | R.G. Springsteen       | tt0040768 |
| 1745271894 | 2000 | 2000 | Red Planet                  | Red Planet                  | Hoffman, Antony                     | Antony Hoffman         | tt0199753 |
| 1746561538 | 1955 | 1955 | Strips Around the World     | Strips Around the World     | Tucker, Phil                        | Phil Tucker            | tt1141334 |
| 1746584917 | 1940 | 1940 | Broadway Melody of 1940     | Broadway Melody of 1940     | Taugo, Norman                       | Norman Taugo           | tt0032284 |
| 1746475734 | 1948 | 1948 | Red River                   | Red River                   | Hawks, Howard                       | Howard Hawks           | tt0040724 |
| 1746454652 | 1946 | 1946 | Strange Impersonation       | Strange Impersonation       | Mann, Anthony                       | Anthony Mann           | tt0038986 |
| 1746515278 | 1921 | 1921 | Patsy                       | Patsy                       | McDermott, John                     | John McDermott         | tt0012559 |
| 1746566021 | 1958 | 1958 | The Littlest Hobo           | The Littlest Hobo           | Rondeau, Charles R.                 | Charles R. Rondeau     | tt0051870 |
| 1746550274 | 1956 | 1956 | Picnic                      | Picnic                      | Logan, Joshua                       | Joshua Logan           | tt0048491 |
| 1746569715 | 1953 | 1953 | Sword of Venus              | Sword of Venus              | Daniels, Harold                     | Harold Daniels         | tt0046388 |
| 1746585006 | 1939 | 1939 | Arizona Legion              | Arizona Legion              | Howard, David                       | David Howard           | tt0031052 |
| 1746485894 | 1918 | 1918 | Too Fat to Fight            | Too Fat to Fight            | Henley, Hobart                      | Hobart Henley          | tt0009712 |
| 1746555143 | 1955 | 1954 | 3 Ring Circus               | 3 Ring Circus               | Pevney, Joseph                      | Joseph Pevney          | tt0047582 |
| 1746509035 | 1926 | 1926 | Her Sacrifice               | Her Sacrifice               | Lucas, Wilfred                      | Wilfred Lucas          | tt0016961 |
| 1746523745 | 1916 | 1916 | The Black Butterfly         | The Black Butterfly         | King, Burton L.                     | Burton L. King         | tt0157406 |
| 1746566270 | 1957 | 1957 | Copper Sky                  | Copper Sky                  | Warren, Charles Marquis             | Charles Marquis Warren | tt0050265 |
| 1746582852 | 1935 | 1935 | Western Frontier            | Western Frontier            | Herman, Albert                      | Albert Herman          | tt0027198 |
| 1746555820 | 1956 | 1956 | The Leather Saint           | The Leather Saint           | Ganzer, Alvin                       | Alvin Ganzer           | tt0049436 |
| 1746509030 | 1927 | 1927 | The Romantic Age            | The Romantic Age            | Florey, Robert                      | Robert Florey          | tt0018336 |
| 1746453485 | 1941 | 1941 | Hands Across the Rockies    | Hands Across the Rockies    | Hillyer, Lambert                    | Lambert Hillyer        | tt0129982 |
| 1746500021 | 1924 | 1924 | Walloping Wallace           | Walloping Wallace           | Thorpe, Richard; Myles, Norbert     | Norbert A. Myles       | tt0177351 |
| 1746453651 | 1941 | 1941 | Puddin' Head                | Puddin' Head                | Santley, Joseph                     | Joseph Santley         | tt0034074 |
| 1746435162 | 1942 | 1942 | Mug Town                    | Mug Town                    | Taylor, Ray                         | Ray Taylor             | tt0036176 |
| 1746550017 | 1954 | 1954 | Highway Dragnet             | Highway Dragnet             | Juran, Nathan                       | Nathan Juran           | tt0047087 |
| 1746532467 | 1923 | 1923 | Thundering Dawn             | Thundering Dawn             | Garson, Harry                       | Harry Garson           | tt0014545 |
| 1746570755 | 1933 | 1933 | The Crime of the Century    | The Crime of the Century    | Beaudine, William                   | William Beaudine       | tt0023918 |
| 1746475745 | 1946 | 1946 | The Last Crooked Mile       | The Last Crooked Mile       | Ford, Philip                        | Philip Ford            | tt0038683 |
| 1746560657 | 1932 | 1932 | The Texan                   | The Texan                   | Smith, Cliff                        | Clifford Smith         | tt0023564 |
| 1746573385 | 1931 | 1931 | Ten Cents a Dance           | Ten Cents a Dance           | Barrymore, Lionel                   | Lionel Barrymore       | tt0022469 |
| 1746582602 | 1939 | 1939 | Flight at Midnight          | Flight at Midnight          | Salkow, Sidney                      | Sidney Salkow          | tt0031320 |
| 1746508904 | 1925 | 1925 | No Man's Law                | No Man's Law                | Andrews, Del                        | Del Andrews            | tt0334008 |
| 1769970424 | 1966 | 1966 | All My Men                  | All My Men                  |                                     | C. Davis Smith         | tt0131270 |
| 1746496285 | 1918 | 1918 | The Goddess of Lost Lake    | The Goddess of Lost Lake    | Worsley, Wallace                    | Wallace Worsley        | tt0009120 |
| 1746408463 | 1984 | 1984 | Romancing the Stone         | Romancing the Stone         | Zemeckis, Robert                    | Robert Zemeckis        | tt0088011 |
| 1746495902 | 1918 | 1918 | The Daredevil               | The Daredevil               | Grandon, Francis                    | Francis J. Grandon     | tt0184379 |
| 1746474457 | 1944 | 1944 | Enter Arsene Lupin          | Enter Arsene Lupin          | Beebe, Ford                         | Ford Beebe             | tt0036794 |
| 1746219186 | 1973 | 1974 | The Single Girls            | The Single Girls            | Sebastian, Ferd; Sebastian, Beverly | Beverly Sebastian      | tt0070697 |
| 1746513846 | 1913 | 1913 | The Port of Doom            | The Port of Doom            | Dawley, J. Searle                   | J. Searle Dawley       | tt0003289 |
| 1746574332 | 1958 | 1958 | The 7th Voyage of Sinbad    | The 7th Voyage of Sinbad    | Juran, Nathan                       | Nathan Juran           | tt0051337 |
| 1746583865 | 1930 | 1930 | Only the Brave              | Only the Brave              | Tuttle, Frank                       | Frank Tuttle           | tt0021219 |
| 1746580837 | 1937 | 1937 | The Firefly                 | The Firefly                 | Leonard, Robert Z.                  | Robert Z. Leonard      | tt0028873 |
| 1746569527 | 1958 | 1958 | As Young as We Are          | As Young as We Are          | Girard, Bernard                     | Bernard Girard         | tt0051377 |
| 1746571143 | 1953 | 1953 | My Cousin Rachel            | My Cousin Rachel            | Koster, Henry                       | Henry Koster           | tt0044937 |
| 1746508044 | 1924 | 1924 | Lightning Romance           | Lightning Romance           | Rogell, Albert                      | Albert S. Rogell       | tt0015070 |
| 1746561534 | 1955 | 1955 | Francis in the Navy         | Francis in the Navy         | Lubin, Arthur                       | Arthur Lubin           | tt0048092 |
| 1746580711 | 1937 | 1937 | Small Town Boy              | Small Town Boy              | Tryon, Glenn                        | Glenn Tryon            | tt0029580 |

|                   |             |             |                                 |                                 |                            |                        |                  |
|-------------------|-------------|-------------|---------------------------------|---------------------------------|----------------------------|------------------------|------------------|
| 1746562425        | 1953        | 1953        | Pickup on South Street          | Pickup on South Street          | Fuller, Samuel             | Samuel Fuller          | tt0046187        |
| 1746439225        | 1997        | 1997        | Cop Land                        | Cop Land                        | Mangold, James             | James Mangold          | tt0118887        |
| 1746520965        | 1948        | 1948        | Words and Music                 | Words and Music                 | Taugo, Norman              | Norman Taurog          | tt0040976        |
| 1746235205        | 1979        | 1979        | The Jerk                        | The Jerk                        | Reiner, Carl               | Carl Reiner            | tt0079367        |
| 1746504898        | 1918        | 1918        | The Married Virgin              | The Married Virgin              | Maxwell, Joe               | Joseph Maxwell         | tt0009356        |
| 1746464980        | 1946        | 1946        | Terror Trail                    | Terror Trail                    | Nazarro, Ray               | Ray Nazarro            | tt0039891        |
| 1746561175        | 1932        | 1932        | The Crusader                    | The Crusader                    | Strayer, Frank             | Frank R. Strayer       | tt0022794        |
| 1746582383        | 1930        | 1930        | The Devil to Pay                | The Devil to Pay!               | Fitzmaurice, George        | George Fitzmaurice     | tt0020821        |
| 1746436551        | 1942        | 1942        | Tarzan's New York Adventure     | Tarzan's New York Adventure     | Thorpe, Richard            | Richard Thorpe         | tt0035419        |
| 1746498278        | 1921        | 1920        | Guile of Women                  | Guile of Women                  | Badger, Clarence           | Clarence G. Badger     | tt0012244        |
| 1746394723        | 1992        | 1992        | The Distinguished Gentleman     | The Distinguished Gentleman     | Lynn, Jonathan             | Jonathan Lynn          | tt0104114        |
| 1746572859        | 1910        | 1910        | Dooley Referees the Big Fight   | Dooley Referees the Big Fight   |                            | Fred J. Balshofer      | tt0359180        |
| 1746454230        | 1943        | 1943        | Rhythm of the Islands           | Rhythm of the Islands           | Neill, Roy William         | Roy William Neill      | tt0036311        |
| 1745293423        | 2007        | 2007        | Blades of Glory                 | Blades of Glory                 | Speck, Will ; Gordon, Josh | Josh Gordon            | tt0445934        |
| 1746574587        | 1935        | 1935        | Car 99                          | Car 99                          | Barton, Charles            | Charles Barton         | tt0026178        |
| 1746523449        | 1916        | 1916        | Her Father's Son                | Her Father's Son                | Taylor, William D.         | William Desmond Taylor | tt0006789        |
| <b>1746574210</b> | <b>1962</b> | <b>1962</b> | <b>Stakeout!</b>                | <b>Stakeout!</b>                | <b>Landis, James</b>       | <b>James Landis</b>    | <b>tt0056524</b> |
| 1745359362        | 2008        | 2008        | The Strangers                   | The Strangers                   | Bertino, Bryan             | Bryan Bertino          | tt0482606        |
| 1746581917        | 1951        | 1951        | Buckaroo Sheriff of Texas       | Buckaroo Sheriff of Texas       | Ford, Philip               | Philip Ford            | tt0042288        |
| 1746473908        | 1947        | 1947        | Monsieur Verdoux                | Monsieur Verdoux                | Chaplin, Charles           | Charles Chaplin        | tt0039631        |
| 1745342815        | 2003        | 2003        | Bruce Almighty                  | Bruce Almighty                  | Shadyac, Tom               | Tom Shadyac            | tt0315327        |
| 1746509302        | 1924        | 1924        | Her Love Story                  | Her Love Story                  | Dwan, Allan                | Allan Dwan             | tt0014981        |
| 1746509585        | 1925        | 1925        | Borrowed Finery                 | Borrowed Finery                 | Apfel, Oscar               | Oscar Apfel            | tt0015640        |
| 1746580839        | 1937        | 1937        | We Have Our Moments             | We Have Our Moments             | Werker, Alfred L.          | Alfred L. Werker       | tt0029749        |
| 1746249032        | 1975        | 1975        | Blazing Stewardesses            | Blazing Stewardesses            | Adamson, Al                | Al Adamson             | tt0071231        |
| 1746575380        | 1910        | 1910        | The Count of Montebello         | The Count of Montebello         |                            | Harry Solter           | tt0200548        |
| 1746491735        | 1947        | 1947        | Twilight on the Rio Grande      | Twilight on the Rio Grande      | McDonald, Frank            | Frank McDonald         | tt0039924        |
| 1746571038        | 1910        | 1910        | The Confederate Spy             | The Confederate Spy             |                            | Sidney Olcott          | tt0139125        |
| 1745282672        | 2004        | 2004        | Malevolence                     | Malevolence                     | Mena, Stevan               | Nick Groff             | tt0389139        |
| 1746516032        | 1920        | 1920        | Dangerous Days                  | Dangerous Days                  | Barker, Reginald           | Reginald Barker        | tt0011091        |
| 1746513786        | 1915        | 1915        | Under Southern Skies            | Under Southern Skies            | Henderson, Lucius          | Lucius Henderson       | tt0006196        |
| 1746575917        | 1910        | 1910        | The Converts                    | The Converts                    | Griffith, D. W.            | D. W. Griffith         | tt0001161        |
| 1746577091        | 1951        | 1951        | Bride of the Gorilla            | Bride of the Gorilla            | Siodmak, Curt              | Curt Siodmak           | tt0043360        |
| 1746492455        | 1948        | 1948        | Give My Regards to Broadway     | Give My Regards to Broadway     | Bacon, Lloyd               | Lloyd Bacon            | tt0040390        |
| 1746524953        | 1914        | 1914        | Washington at Valley Forge      | Washington at Valley Forge      | Ford, Francis              | Francis Ford           | tt0004781        |
| 1746583093        | 1935        | 1935        | Racing Luck                     | Racing Luck                     | Newfield, Sam              | Sam Newfield           | tt0265608        |
| 1746520984        | 1949        | 1949        | Desert Vigilante                | Desert Vigilante                | Sears, Fred F.             | Fred F. Sears          | tt0041291        |
| 1746577379        | 1950        | 1950        | Wyoming Mail                    | Wyoming Mail                    | LeBorg, Reginald           | Reginald Le Borg       | tt0043149        |
| 1746577539        | 1936        | 1936        | The Charge of the Light Brigade | The Charge of the Light Brigade | Curtiz, Michael            | Michael Curtiz         | tt0027438        |
| 1769969944        | 1912        | 1912        | Shall Never Hunger              | Shall Never Hunger              |                            |                        | tt0358134        |
| 1746491951        | 1944        | 1944        | The Hitler Gang                 | The Hitler Gang                 | Farrow, John               | John Farrow            | tt0036921        |
| 1746578696        | 1960        | 1960        | Psycho                          | Psycho                          | Hitchcock, Alfred          | Alfred Hitchcock       | tt0054215        |
| 1746524756        | 1914        | 1914        | Rip Van Winkle                  | Rip Van Winkle                  |                            |                        | tt0004537        |
| 1746219152        | 1979        | 1979        | The Main Event                  | The Main Event                  | Zieff, Howard              | Howard Zieff           | tt0079510        |
| 1746577567        | 1933        | 1933        | Lady for a Day                  | Lady for a Day                  | Capra, Frank               | Frank Capra            | tt0024240        |
| 1746574716        | 1934        | 1934        | Harlem After Midnight           | Harlem After Midnight           | Micheaux, Oscar            | Oscar Micheaux         | tt0139339        |
| 1746475520        | 1948        | 1948        | Sword of the Avenger            | Sword of the Avenger            | Salkow, Sidney             | Sidney Salkow          | tt0040854        |
| 1746575575        | 1931        | 1931        | Bad Girl                        | Bad Girl                        | Borzage, Frank             | Frank Borzage          | tt0021635        |
| 1746580489        | 1937        | 1937        | New Faces of 1937               | New Faces of 1937               | Jason, Leigh               | Leigh Jason            | tt0029303        |
| 1746583436        | 1951        | 1951        | Vengeance Valley                | Vengeance Valley                | Thorpe, Richard            | Richard Thorpe         | tt0044186        |
| 1746571111        | 1934        | 1934        | Circus Clown                    | The Circus Clown                | Enright, Ray               | Ray Enright            | tt0024981        |
| 1769970472        | 1965        | 1966        | Corruption of the Damned        | Corruption of the Damned        | Kuchar, George             | George Kuchar          | tt0215672        |
| 1746568139        | 1933        | 1933        | The Woman Accused               | The Woman Accused               | Sloane, Paul               | Paul Sloane            | tt0024781        |
| 1746567798        | 1932        | 1932        | Congorilla                      | Congorilla                      |                            | Martin E. Johnson      | tt0129840        |
| 1746542705        | 1926        | 1926        | Unknown Dangers                 | Unknown Dangers                 | Jones, Grover              | Grover Jones           | tt0017501        |
| 1746454045        | 1941        | 1941        | Sleepers West                   | Sleepers West                   | Forde, Eugene              | Eugene Forde           | tt0034199        |
| 1746568216        | 1952        | 1952        | One Minute to Zero              | One Minute to Zero              | Garnett, Tay               | Tay Garnett            | tt0044997        |

|            |      |      |                                 |                               |                       |                                     |           |
|------------|------|------|---------------------------------|-------------------------------|-----------------------|-------------------------------------|-----------|
| 1746583302 | 1930 | 1930 | Our Blushing Brides             | Our Blushing Brides           | Beaumont, Harry       | Harry Beaumont                      | tt0021223 |
| 1746562166 | 1953 | 1953 | I Confess                       | I Confess                     | Hitchcock, Alfred     | Alfred Hitchcock                    | tt0045897 |
| 1746569600 | 1955 | 1955 | The Big Combo                   | The Big Combo                 | Lewis, Joseph         | Joseph H. Lewis                     | tt0047878 |
| 1746513836 | 1916 | 1916 | The Haunted Manor               | The Haunted Manor             | Middleton, Edwin      | Edwin Middleton                     | tt0006758 |
| 1746570419 | 1933 | 1933 | The World Changes               | The World Changes             | Le Roy, Mervyn        | Mervyn LeRoy                        | tt0024786 |
| 1746438139 | 1998 | 1998 | Phoenix                         | Phoenix                       | Cannon, Danny         | Danny Cannon                        | tt0119892 |
| 1746574466 | 1933 | 1932 | Devil's Playground              | Devil's Playground            |                       |                                     | tt1270625 |
| 1746553496 | 1963 | 1963 | Cleopatra                       | Cleopatra                     | Mankiewicz, Joseph L. | Joseph L. Mankiewicz                | tt0056937 |
| 1746503544 | 1919 | 1919 | Getting Mary Married            | Getting Mary Married          | Dwan, Allan           | Allan Dwan                          | tt0010162 |
| 1746419104 | 1940 | 1940 | The Girl from Avenue A          | Girl from Avenue A            | Brower, Otto          | Otto Brower                         | tt0032525 |
| 1746571656 | 1910 | 1910 | The Dumb Half Breed's Defence   | The Dumb Half Breed's Defense |                       | Gilbert M. 'Broncho Billy' Anderson | tt0001188 |
| 1746421332 | 1997 | 1997 | Liar Liar                       | Liar Liar                     | Shadyac, Tom          | Tom Shadyac                         | tt0119528 |
| 1746423021 | 1998 | 1998 | Zero Effect                     | Zero Effect                   | Kasdan, Jake          | Jake Kasdan                         | tt0120906 |
| 1746566153 | 1958 | 1958 | The Goddess                     | The Goddess                   | Cromwell, John        | John Cromwell                       | tt0051667 |
| 1746455013 | 1996 | 1996 | Jingle All the Way              | Jingle All the Way            | Levant, Brian         | Brian Levant                        | tt0116705 |
| 1745303218 | 2005 | 2005 | Batman Begins                   | Batman Begins                 | Nolan, Christopher    | Christopher Nolan                   | tt0372784 |
| 1746437316 | 1942 | 1942 | Hi, Neighbor                    | Hi, Neighbor                  | Lamont, Charles       | Charles Lamont                      | tt0034849 |
| 1746496330 | 1918 | 1918 | Ruggles of Red Gap              | Ruggles of Red Gap            | Windom, Lawrence C.   | Lawrence C. Windom                  | tt0152242 |
| 1746542635 | 1926 | 1926 | Children of Fate                | Children of Fate              |                       |                                     | tt0321663 |
| 1745341318 | 2001 | 2001 | Donnie Darko                    | Donnie Darko                  | Kelly, Richard        | Richard Kelly                       | tt0246578 |
| 1746569522 | 1954 | 1954 | Target Earth                    | Target Earth                  | Rose, Sherman A.      | Sherman A. Rose                     | tt0047559 |
| 1746584455 | 1928 | 1928 | The Home Towners                | The Home Towners              | Foy, Bryan            | Bryan Foy                           | tt0019012 |
| 1746393301 | 1983 | 1983 | Nightmares                      | Nightmares                    | Sargent, Joseph       | Joseph Sargent                      | tt0086014 |
| 1745359377 | 2009 | 2009 | Ghosts of Girlfriends Past      | Ghosts of Girlfriends Past    | Waters, Mark          | Mark Waters                         | tt0821640 |
| 1746499855 | 1946 | 1946 | No Leave, No Love               | No Leave, No Love             | Martin, Charles       | Charles Martin                      | tt0038779 |
| 1746530775 | 1950 | 1950 | Breakthrough                    | Breakthrough                  | Seiler, Lewis         | Lewis Seiler                        | tt0042282 |
| 1746507768 | 1926 | 1926 | Flashing Fangs                  | Flashing Fangs                | McCarthy, Henry       | Henry McCarty                       | tt0132963 |
| 1746464786 | 1940 | 1940 | I Take This Oath                | I Take This Oath              | Scott, Sherman        | Sam Newfield                        | tt0032618 |
| 1746474081 | 1945 | 1945 | China's Little Devils           | China's Little Devils         | Bell, Monta           | Monta Bell                          | tt0037594 |
| 1746580749 | 1938 | 1938 | Mr. Doodle Kicks Off            | Mr. Doodle Kicks Off          | Goodwins, Leslie      | Leslie Goodwins                     | tt0030468 |
| 1746439426 | 1996 | 1996 | The Cable Guy                   | The Cable Guy                 | Stiller, Ben          | Ben Stiller                         | tt0115798 |
| 1746439154 | 1942 | 1942 | City of Silent Men              | City of Silent Men            | Nigh, William         | William Nigh                        | tt0034598 |
| 1746500923 | 1916 | 1916 | The Dividend                    | The Dividend                  | Edwards, Walter       | Walter Edwards                      | tt0006596 |
| 1745282746 | 2005 | 2005 | The Ice Harvest                 | The Ice Harvest               | Ramis, Harold         | Harold Ramis                        | tt0400525 |
| 1746578040 | 1935 | 1935 | The Laramie Kid                 | The Laramie Kid               | Webb, Harry S.        | Harry S. Webb                       | tt0026602 |
| 1769970453 | 1967 | 1967 | The Degenerates                 | The Degenerates               | Milligan, Andy        | Andy Milligan                       | tt0216679 |
| 1746577579 | 1938 | 1938 | Spring Madness                  | Spring Madness                | Simon, S. Sylvan      | S. Sylvan Simon                     | tt0030783 |
| 1746507761 | 1925 | 1925 | Peggy of the Secret Service     | Peggy of the Secret Service   | McGowan, J. P.        | J.P. McGowan                        | tt0016208 |
| 1746514267 | 1922 | 1922 | Boomerang Justice               | Boomerang Justice             | Sedgwick, Edward      | Edward Sedgwick                     | tt0012962 |
| 1746465417 | 1946 | 1946 | Idea Girl                       | Idea Girl                     | Jason, Will           | Will Jason                          | tt0038630 |
| 1746545083 | 1940 | 1940 | Pioneers of the West            | Pioneers of the West          | Orlebeck, Lester      | Lester Orlebeck                     | tt0032914 |
| 1746561994 | 1955 | 1955 | Night Freight                   | Night Freight                 | Yarbrough, Jean       | Jean Yarbrough                      | tt0048422 |
| 1746454837 | 1941 | 1941 | Scotland Yard                   | Scotland Yard                 | Foster, Norman        | Norman Foster                       | tt0034158 |
| 1746567256 | 1932 | 1932 | Sherlock Holmes                 | Sherlock Holmes               | Howard, William K.    | William K. Howard                   | tt0023460 |
| 1746424575 | 1942 | 1942 | Ride 'Em Cowboy                 | Ride 'Em Cowboy               | Lubin, Arthur         | Arthur Lubin                        | tt0035252 |
| 1746508967 | 1924 | 1924 | Heart of Alaska                 | Heart of Alaska               | McCracken, Harold     | Harold McCracken                    | tt0014975 |
| 1746514114 | 1916 | 1916 | The Tale of a Coat              | The Tale of a Coat            | Beaudine, William     | William Beaudine                    | tt0463194 |
| 1746500702 | 1924 | 1924 | The New School Teacher          | The New School Teacher        | La Cava, Gregory      | Gregory La Cava                     | tt0015171 |
| 1746577767 | 1936 | 1936 | Next Time We Love               | Next Time We Love             | Griffith, Edward H.   | Edward H. Griffith                  | tt0028029 |
| 1746584919 | 1940 | 1940 | Laughing at Danger              | Laughing at Danger            | Bretherton, Howard    | Howard Bretherton                   | tt0032691 |
| 1746497893 | 1917 | 1917 | The Natural Law                 | The Natural Law               | France, Charles H.    | Charles H. France                   | tt0008363 |
| 1746577224 | 1963 | 1963 | It's a Mad, Mad, Mad, Mad World | It's a Mad Mad Mad Mad World  | Kramer, Stanley       | Stanley Kramer                      | tt0057193 |
| 1745302530 | 2006 | 2005 | Zerophilia                      | Zerophilia                    | Curland, Martin       | Martin Curland                      | tt0421090 |
| 1746508998 | 1925 | 1925 | Classified                      | Classified                    | Santell, Alfred       | Alfred Santell                      | tt0015688 |
| 1746530778 | 1950 | 1950 | Captive Girl                    | Captive Girl                  | Berke, William        | William Berke                       | tt0042311 |
| 1746516503 | 1921 | 1921 | The Rage of Paris               | The Rage of Paris             | Conway, Jack          | Jack Conway                         | tt0012604 |
| 1746474417 | 1944 | 1944 | Detective Kitty O'Day           | Detective Kitty O'Day         | Beaudine, William     | William Beaudine                    | tt0207407 |



|            |      |      |                                      |                                      |                                    |                       |           |
|------------|------|------|--------------------------------------|--------------------------------------|------------------------------------|-----------------------|-----------|
| 1746554694 | 1964 | 1964 | The Fall of the Roman Empire         | The Fall of the Roman Empire         | Mann, Anthony                      | Anthony Mann          | tt0058085 |
| 1746520985 | 1949 | 1949 | Manhattan Angel                      | Manhattan Angel                      | Dreifuss, Arthur                   | Arthur Dreifuss       | tt0041632 |
| 1746497514 | 1917 | 1917 | The Little Boy Scout                 | The Little Boy Scout                 | Grandon, Francis J.                | Francis J. Grandon    | tt0176936 |
| 1745340778 | 2003 | 2003 | Chasing Papi                         | Chasing Papi                         | Mendoza, Linda                     | Linda Mendoza         | tt0323572 |
| 1746501867 | 1916 | 1916 | The Torch Bearer                     | The Torch Bearer                     | Prescott, Jack; Russell, William   | Jack Prescott         | tt0159040 |
| 1746523997 | 1915 | 1915 | All for a Girl                       | All for a Girl                       | Applegate, Roy                     | Roy Applegate         | tt0004878 |
| 1746508050 | 1924 | 1924 | Flashing Spurs                       | Flashing Spurs                       | Eason, Reeves                      | B. Reeves Eason       | tt0014909 |
| 1746508718 | 1923 | 1923 | Hearts Aflame                        | Hearts Aflame                        | Barker, Reginald                   | Reginald Barker       | tt0014121 |
| 1746567268 | 1933 | 1933 | Good Housewrecking                   | Good Housewrecking                   | Sweet, Harry                       | Harry Sweet           | tt0024074 |
| 1746569917 | 1959 | 1959 | For the First Time                   | For the First Time                   | Maté, Rudolph                      | Rudolph Maté          | tt0052817 |
| 1746504575 | 1920 | 1920 | When Quackel Did Hide                | When Quackel Did Hide                | Gramlich, Charles                  | Charlie Joy           | tt0203195 |
| 1746199844 | 1968 | 1968 | Finders Keepers, Lovers Weepers      | Finders Keepers, Lovers Weepers!     | Meyer, Russ                        | Russ Meyer            | tt0062973 |
| 1746503265 | 1917 | 1917 | The Deemster                         | The Deemster                         | Hansel, Howell                     | Howell Hansel         | tt0007845 |
| 1746210679 | 1973 | 1973 | Trader Horn                          | Trader Horn                          | Badiyi, Reza S.                    | Reza Badiyi           | tt0070823 |
| 1746454503 | 1946 | 1946 | Night Editor                         | Night Editor                         | Levin, Henry                       | Henry Levin           | tt0038774 |
| 1746235456 | 1974 | 1974 | That's Entertainment                 | That's Entertainment!                | Haley, Jack                        | Jack Haley Jr.        | tt0072272 |
| 1746210949 | 1970 | 1970 | Which Way to the Front?              | Which Way to the Front?              | Lewis, Jerry                       | Jerry Lewis           | tt0066564 |
| 1746491760 | 1948 | 1948 | One Touch of Venus                   | One Touch of Venus                   | Seiter, William A.                 | William A. Seiter     | tt0040669 |
| 1746514676 | 1916 | 1916 | Not My Sister                        | Not My Sister                        | Giblyn, Charles                    | Charles Giblyn        | tt0007132 |
| 1746560749 | 1965 | 1965 | How To Murder Your Wife              | How to Murder Your Wife              | Quine, Richard                     | Richard Quine         | tt0058212 |
| 1745372597 | 2002 | 2001 | By Hook or By Crook                  | By Hook or by Crook                  | Dodge, Harry; Howard, Silas        | Harry Dodge           | tt0290498 |
| 1746508224 | 1925 | 1925 | The Sporting Chance                  | The Sporting Chance                  | Apfel, Oscar                       | Oscar Apfel           | tt0016388 |
| 1746569735 | 1958 | 1958 | I Married a Monster from Outer Space | I Married a Monster from Outer Space | Fowler, Gene                       | Gene Fowler Jr.       | tt0051756 |
| 1746433942 | 1995 | 1995 | Braveheart                           | Braveheart                           | Gibson, Mel                        | Mel Gibson            | tt0112573 |
| 1746562294 | 1953 | 1953 | Forbidden                            | Forbidden                            | Maté, Rudolph                      | Rudolph Maté          | tt0045780 |
| 1746419591 | 1991 | 1990 | Old Explorers                        | Old Explorers                        | Pohlad, William                    | Bill Pohlad           | tt0100287 |
| 1746574545 | 1935 | 1935 | Riding Wild                          | Riding Wild                          | Selman, David                      | David Selman          | tt0026931 |
| 1746234025 | 1966 | 1966 | For Pete's Sake!                     | For Pete's Sake                      | Collier, James F.                  | James F. Collier      | tt0212947 |
| 1769975281 | 1916 | 1916 | The Vengeance of the Oppressed       | Vengeance of the Oppressed           | Sloman, Edward                     | Edward Sloman         | tt0453291 |
| 1746503359 | 1919 | 1919 | For Better, for Worse                | For Better, for Worse                | DeMille, Cecil B.                  | Cecil B. DeMille      | tt0010137 |
| 1746503468 | 1917 | 1917 | Mentioned in Confidence              | Mentioned in Confidence              | Jones, Edgar                       | Edgar Jones           | tt0178753 |
| 1746421968 | 1997 | 1997 | Flubber                              | Flubber                              | Mayfield, Les                      | Les Mayfield          | tt0119137 |
| 1746503103 | 1910 | 1910 | The Man Who Died                     | The Man Who Died                     |                                    |                       | tt1846776 |
| 1745293869 | 2005 | 2005 | Prime                                | Prime                                | Younger, Ben                       | Ben Younger           | tt0387514 |
| 1746508869 | 1925 | 1925 | High and Handsome                    | High and Handsome                    | Garson, Harry                      | Harry Garson          | tt0135447 |
| 1746513050 | 1923 | 1923 | The Supreme Test                     | The Supreme Test                     | MacNamara, W. P.                   | W.P. MacNamara        | tt0014520 |
| 1746570176 | 1933 | 1933 | The Fighting Cowboy                  | The Fighting Cowboy                  | Dixon, Denver                      | Victor Adamson        | tt0132157 |
| 1745341611 | 2002 | 2002 | Bad Company                          | Bad Company                          | Schumacher, Joel                   | Joel Schumacher       | tt0280486 |
| 1746454222 | 1942 | 1942 | Rhythm Parade                        | Rhythm Parade                        | Bretherton, Howard; Gould, Dave    | Howard Bretherton     | tt0036309 |
| 1746455929 | 1995 | 1995 | Hackers                              | Hackers                              | Softley, Iain                      | Iain Softley          | tt0113243 |
| 1746409295 | 1988 | 1988 | Powaqqatsi                           | Powaqqatsi                           | Reggio, Godfrey                    | Godfrey Reggio        | tt0095895 |
| 1746520337 | 1926 | 1926 | The Dixie Merchant                   | The Dixie Merchant                   | Borzage, Frank                     | Frank Borzage         | tt0016799 |
| 1746571855 | 1931 | 1931 | Murder by the Clock                  | Murder by the Clock                  | Sloman, Edward                     | Edward Sloman         | tt0022173 |
| 1746524620 | 1916 | 1916 | The Lost Bridegroom                  | The Lost Bridegroom                  | Kirkwood, James                    | James Kirkwood        | tt0006942 |
| 1746202378 | 1970 | 1970 | The Amazing Transplant               | The Amazing Transplant               | Silverman, Louis                   | Doris Wishman         | tt0065390 |
| 1746492578 | 1945 | 1945 | Lone Texas Ranger                    | Lone Texas Ranger                    | Bennet, Spencer                    | Spencer Gordon Bennet | tt0210814 |
| 1745341753 | 2010 | 2010 | Tooth Fairy                          | Tooth Fairy                          | Lembeck, Michael                   | Michael Lembeck       | tt0808510 |
| 1746582902 | 1938 | 1938 | Keep Smiling                         | Keep Smiling                         | Leeds, Herbert I.                  | Herbert I. Leeds      | tt0030316 |
| 1746569900 | 1954 | 1954 | Make Haste to Live                   | Make Haste to Live                   | Seiter, William A.                 | William A. Seiter     | tt0047205 |
| 1746514112 | 1915 | 1914 | The Chocolate Soldier                | The Chocolate Soldier                | Morton, Walter; Stange, Stanislaus | Walter Morton         | tt0005091 |
| 1746512054 | 1917 | 1917 | The Climber                          | The Climber                          | King, Henry                        | Henry King            | tt0007803 |
| 1746500086 | 1924 | 1924 | The Desert Secret                    | The Desert Secret                    | Reel, Frederick                    | Frederick Reel Jr.    | tt0243850 |
| 1746520289 | 1924 | 1924 | Flowing Gold                         | Flowing Gold                         | De Grasse, Joseph                  | Joseph De Grasse      | tt0014915 |
| 1746502012 | 1914 | 1914 | Shorty Escapes Marriage              | Shorty Escapes Marriage              | Stanton, Richard                   | Richard Stanton       | tt0004588 |
| 1746569515 | 1958 | 1958 | The Gun Runners                      | The Gun Runners                      | Siegel, Donald                     | Don Siegel            | tt0051687 |
| 1746581805 | 1950 | 1950 | Woman on the Run                     | Woman on the Run                     | Foster, Norman                     | Norman Foster         | tt0043142 |
| 1746520118 | 1923 | 1923 | Hollywood                            | Hollywood                            | Cruze, James                       | James Cruze           | tt0014137 |

|                   |             |             |                                        |                                        |                                     |                      |                  |
|-------------------|-------------|-------------|----------------------------------------|----------------------------------------|-------------------------------------|----------------------|------------------|
| 1746532945        | 1915        | 1915        | The Martyrs of the Alamo               | Martyrs of the Alamo                   | Cabanne, W. Christy                 | Christy Cabanne      | tt0005719        |
| 1746485175        | 1918        | 1918        | The Locked Heart                       | The Locked Heart                       | King, Henry                         | Henry King           | tt0009313        |
| 1746473708        | 1944        | 1944        | Law Men                                | Law Men                                | Hillyer, Lambert                    | Lambert Hillyer      | tt0037009        |
| 1769969954        | 1912        | 1912        | The New Member of the Life Saving Crew | The New Member of the Life Saving Crew |                                     | Harold M. Shaw       | tt0002389        |
| 1746422578        | 1994        | 1994        | That's Entertainment! III              | That's Entertainment! III              | Friedgen, Bud; Sheridan, Michael J. | Bud Friedgen         | tt0111408        |
| 1746501342        | 1916        | 1916        | Joan the Woman                         | Joan the Woman                         | DeMille, Cecil B.                   | Cecil B. DeMille     | tt0008150        |
| 1746523819        | 1915        | 1915        | The Concealed Truth                    | The Concealed Truth                    | Abramson, Ivan                      | Ivan Abramson        | tt0005129        |
| 1746585031        | 1940        | 1940        | Waterloo Bridge                        | Waterloo Bridge                        | LeRoy, Mervyn                       | Mervyn LeRoy         | tt0033238        |
| <b>1746584674</b> | <b>1928</b> | <b>1928</b> | <b>Fangs of Fate</b>                   | <b>Fangs of Fate</b>                   | <b>Smith, Noel Mason</b>            | <b>Noel M. Smith</b> | <b>tt0131384</b> |
| 1746466875        | 1917        | 1917        | The Price of Pride                     | The Price of Pride                     | Knoles, Harley                      | Harley Knoles        | tt0008452        |
| 1746574321        | 1961        | 1961        | The Gambler Wore a Gun                 | The Gambler Wore a Gun                 | Cahn, Edward L.                     | Edward L. Cahn       | tt0054909        |
| 1746503889        | 1920        | 1920        | The U.P. Trail                         | The U.P. Trail                         | Conway, Jack                        | Jack Conway          | tt0011802        |
| 1746523750        | 1913        | 1913        | Leah Kleschna                          | Leah Kleschna                          | Dawley, J. Searle                   | J. Searle Dawley     | tt0003056        |
| 1746577848        | 1937        | 1937        | Lightnin' Crandall                     | Lightnin' Crandall                     | Newfield, Sam                       | Sam Newfield         | tt0029147        |
| 1746422960        | 1994        | 1994        | There Goes My Baby                     | There Goes My Baby                     | MutruX, Floyd                       | Floyd MutruX         | tt0108320        |
| 1746578592        | 1951        | 1951        | Tales of Robin Hood                    | Tales of Robin Hood                    | Tinling, James                      | James Tinling        | tt0044104        |
| 1745302958        | 2005        | 2005        | Grizzly Man                            | Grizzly Man                            | Herzog, Werner                      | Werner Herzog        | tt0427312        |
| 1746409443        | 1987        | 1987        | Over the Top                           | Over the Top                           | Golan, Menahem                      | Menahem Golan        | tt0093692        |
| 1746581268        | 1910        | 1910        | The Last of the Saxons                 | The Last of the Saxons                 | Blackton (?), J. Stuart             | J. Stuart Blackton   | tt0143360        |
| 1746415813        | 1917        | 1917        | The Little Terror                      | The Little Terror                      | Ingram, Rex                         | Rex Ingram           | tt0008199        |
| 1745393834        | 2009        | 2009        | 12 Rounds                              | 12 Rounds                              | Harlin, Renny                       | Renny Harlin         | tt1160368        |
| 1746578401        | 1951        | 1951        | My Forbidden Past                      | My Forbidden Past                      | Stevenson, Robert                   | Robert Stevenson     | tt0043828        |
| 1746532485        | 1916        | 1916        | The Open Track                         | The Open Track                         | Davis, James                        | J. Gunnis Davis      | tt1534533        |
| 1746578969        | 1951        | 1951        | Angels in the Outfield                 | Angels in the Outfield                 | Brown, Clarence                     | Clarence Brown       | tt0043286        |
| 1746523571        | 1927        | 1927        | Duty's Reward                          | Duty's Reward                          | Bracken, Bertram                    | Bertram Bracken      | tt0017838        |
| 1746578457        | 1963        | 1963        | The Terror                             | The Terror                             | Corman, Roger                       | Roger Corman         | tt0057569        |
| 1746569695        | 1956        | 1956        | The Bad Seed                           | The Bad Seed                           | LeRoy, Mervyn                       | Mervyn LeRoy         | tt0048977        |
| 1746492486        | 1946        | 1946        | The Hoodlum Saint                      | The Hoodlum Saint                      | Taurog, Norman                      | Norman Taurog        | tt0038615        |
| 1746465174        | 1946        | 1946        | Slightly Scandalous                    | Slightly Scandalous                    | Jason, Will                         | Will Jason           | tt0038952        |
| 1746499874        | 1950        | 1950        | Motor Patrol                           | Motor Patrol                           | Newfield, Sam                       | Sam Newfield         | tt0042751        |
| 1746569732        | 1958        | 1958        | Edge of Fury                           | Edge of Fury                           | Gurney, Jr., Robert; Lerner, Irving | Robert J. Gurney Jr. | tt0051572        |
| 1746199181        | 1968        | 1968        | The Boston Strangler                   | The Boston Strangler                   | Fleischer, Richard                  | Richard Fleischer    | tt0062755        |
| 1746569645        | 1955        | 1955        | Conquest of Space                      | Conquest of Space                      | Haskin, Byron                       | Byron Haskin         | tt0047947        |
| 1746491840        | 1947        | 1947        | Kilroy Was Here                        | Kilroy Was Here                        | Karlson, Phil                       | Phil Karlson         | tt0039532        |
| 1746197899        | 1967        | 1967        | A Taste of Flesh                       | A Taste of Flesh                       | Silverman, Louis                    | Doris Wishman        | tt0062346        |
| 1746578387        | 1951        | 1951        | Close to My Heart                      | Close to My Heart                      | Keighley, William                   | William Keighley     | tt0043417        |
| 1746476203        | 1945        | 1944        | The Suspect                            | The Suspect                            | Siodmak, Robert                     | Robert Siodmak       | tt0037330        |
| 1746497282        | 1918        | 1918        | A Mother's Secret                      | A Mother's Secret                      | Gerrard, Douglas                    | Douglas Gerrard      | tt0009395        |
| 1746566223        | 1957        | 1957        | Under Fire                             | Under Fire                             | Clark, James B.                     | James B. Clark       | tt0051129        |
| 1746454734        | 1998        | 1998        | Hard Rain                              | Hard Rain                              | Salomon, Mikael                     | Mikael Salomon       | tt0120696        |
| 1746249784        | 1975        | 1974        | Beyond the Door                        | Beyond the Door                        | Hellman, O. ; Barrett, R.           | Ovidio G. Assonitis  | tt0071212        |
| 1746570462        | 1952        | 1952        | The Big Sky                            | The Big Sky                            | Hawks, Howard                       | Howard Hawks         | tt0044419        |
| 1745359236        | 2008        | 2007        | In Search of a Midnight Kiss           | In Search of a Midnight Kiss           | Holdridge, Alex                     | Alex Holdridge       | tt0989000        |
| 1746453475        | 1941        | 1941        | Mountain Moonlight                     | Mountain Moonlight                     | Grinde, Nick                        | Nick Grinde          | tt0033921        |
| 1746501993        | 1916        | 1916        | The Way of the World                   | Ways of the World                      | Carleton, Lloyd B.                  | Carl M. Leviness     | tt0433212        |
| 1746422609        | 1997        | 1997        | Men in Black                           | Men in Black                           | Sonnenfeld, Barry                   | Barry Sonnenfeld     | tt0119654        |
| 1746574266        | 1951        | 1951        | Two Tickets to Broadway                | Two Tickets to Broadway                | Kern, James V.                      | James V. Kern        | tt0044158        |
| 1746524257        | 1916        | 1916        | Idols                                  | Idols                                  | Cullison, Webster                   | Webster Cullison     | tt0157787        |
| 1746584308        | 1936        | 1936        | The Reckless Way                       | The Reckless Way                       | Johnson, Raymond K.                 | Bernard B. Ray       | tt0329531        |
| 1746420250        | 1981        | 1981        | My Dinner with Andre                   | My Dinner with Andre                   | Malle, Louis                        | Louis Malle          | tt0082783        |
| 1746434889        | 1999        | 1999        | The Best Man                           | The Best Man                           | Lee, Malcolm D.                     | Malcolm D. Lee       | tt0168501        |
| 1746574287        | 1951        | 1951        | Criminal Lawyer                        | Criminal Lawyer                        | Friedman, Seymour                   | Seymour Friedman     | tt0043433        |
| 1745302409        | 2007        | 2006        | Boy Culture                            | Boy Culture                            | Brocka, Q. Allan                    | Q. Allan Brocka      | tt0433350        |
| 1746408478        | 1982        | 1982        | Friday the 13th -- Part III            | Friday the 13th Part III               | Miner, Steve                        | Steve Miner          | tt0083972        |
| 1746393495        | 1986        | 1986        | Brighton Beach Memoirs                 | Brighton Beach Memoirs                 | Saks, Gene                          | Gene Saks            | tt0090774        |
| 1746497304        | 1920        | 1920        | Cynthia-of-the-Minute                  | Cynthia of the Minute                  | Vekroff, Perry                      | Perry N. Vekroff     | tt0011087        |
| 1746561909        | 1957        | 1957        | The Big Boodle                         | The Big Boodle                         | Wilson, Richard                     | Richard Wilson       | tt0050189        |

|            |      |      |                              |                              |                               |                       |           |
|------------|------|------|------------------------------|------------------------------|-------------------------------|-----------------------|-----------|
| 1746584983 | 1940 | 1940 | Dance, Girl, Dance           | Dance, Girl, Dance           | Arzner, Dorothy               | Dorothy Arzner        | tt0032376 |
| 1746491864 | 1945 | 1945 | Lawless Empire               | Lawless Empire               | Keays, Vernon                 | Vernon Keays          | tt0038686 |
| 1769970623 | 1968 | 1968 | Sex Family Robinson          | Sex Family Robinson          | Vair, Linda                   | Linda Vair            | tt0257141 |
| 1746464966 | 1942 | 1941 | Suicide Squadron             | Suicide Squadron             | Hurst, Brian Desmond          | Brian Desmond Hurst   | tt0033511 |
| 1746509013 | 1925 | 1925 | The Storm Breaker            | The Storm Breaker            | Sloman, Edward                | Edward Sloman         | tt0016399 |
| 1746500287 | 1924 | 1924 | The Beauty Prize             | The Beauty Prize             | Ingraham, Lloyd               | Lloyd Ingraham        | tt0014704 |
| 1746484690 | 1918 | 1918 | A Society Sensation          | A Society Sensation          | Powell, Paul                  | Edmund Mortimer       | tt0009629 |
| 1746582638 | 1938 | 1938 | Songs and Saddles            | Songs and Saddles            | Fraser, Harry                 | Harry L. Fraser       | tt0169253 |
| 1746508127 | 1924 | 1924 | \$50,000 Reward              | \$50,000 Reward              | Elfelt, Clifford S.           | Clifford S. Elfelt    | tt0014639 |
| 1746533206 | 1915 | 1915 | The Love Route               | The Love Route               | Dwan, Allan                   | Allan Dwan            | tt0005653 |
| 1746418631 | 1940 | 1940 | Phantom Rancher              | Phantom Rancher              | Fraser, Harry                 | Harry L. Fraser       | tt0032902 |
| 1746218764 | 1973 | 1973 | Electra Glide in Blue        | Electra Glide in Blue        | Guercio, James William        | James William Guercio | tt0070022 |
| 1746567252 | 1933 | 1933 | Second Hand Wife             | Second Hand Wife             | MacFadden, Hamilton           | Hamilton MacFadden    | tt0024535 |
| 1746437248 | 1940 | 1940 | Prairie Schooners            | Prairie Schooners            | Nelson, Sam                   | Sam Nelson            | tt0032940 |
| 1746553988 | 1964 | 1964 | Black Like Me                | Black Like Me                | Lerner, Carl                  | Carl Lerner           | tt0057889 |
| 1746524458 | 1915 | 1915 | Seven Sisters                | The Seven Sisters            | Olcott, Sidney                | Sidney Olcott         | tt0006027 |
| 1746581794 | 1928 | 1928 | Power                        | Power                        | Higgin, Howard                | Howard Higgin         | tt0019288 |
| 1746533008 | 1923 | 1923 | Dangerous Trails             | Dangerous Trails             | Neitz, Alvin J.               | Alan James            | tt0013972 |
| 1746580933 | 1959 | 1959 | Surf Crazy                   | Surf Crazy                   | Brown, Bruce                  | Bruce Brown           | tt0298170 |
| 1746235077 | 1974 | 1974 | Airport 1975                 | Airport 1975                 | Smight, Jack                  | Jack Smight           | tt0071110 |
| 1745302747 | 2005 | 2005 | XXX: State of the Union      | xXx: State of the Union      | Tamahori, Lee                 | Lee Tamahori          | tt0329774 |
| 1746583233 | 1930 | 1930 | Part Time Wife               | Part Time Wife               | McCarey, Leo                  | Leo McCarey           | tt0021237 |
| 1746513230 | 1928 | 1928 | Jazzland                     | Jazzland                     | Fitzgerald, Dallas M.         | Dallas M. Fitzgerald  | tt0019042 |
| 1746555367 | 1954 | 1954 | Love Me Madly                | Love Me Madly                | Kirby, Klaytan W.             | Klaytan W. Kirby      | tt1003011 |
| 1746530760 | 1949 | 1949 | Night unto Night             | Night Unto Night             | Siegel, Don                   | Don Siegel            | tt0039660 |
| 1745272052 | 2000 | 2000 | Where the Heart Is           | Where the Heart Is           | Williams, Matt                | Matt Williams         | tt0198021 |
| 1746581474 | 1928 | 1928 | Put 'Em Up                   | Put 'Em Up                   | Lewis, Edgar                  | Edgar Lewis           | tt0019297 |
| 1746583614 | 1951 | 1951 | Halls of Montezuma           | Halls of Montezuma           | Milestone, Lewis              | Lewis Milestone       | tt0042539 |
| 1769969496 | 1911 | 1911 | The Old Curiosity Shop       | The Old Curiosity Shop       | O'Neil, Barry                 | Barry O'Neil          | tt0330716 |
| 1746583522 | 1951 | 1951 | The Groom Wore Spurs         | The Groom Wore Spurs         | Whorf, Richard                | Richard Whorf         | tt0043603 |
| 1746464885 | 1942 | 1942 | Now, Voyager                 | Now, Voyager                 | Rapper, Irving                | Irving Rapper         | tt0035140 |
| 1746208977 | 1967 | 1967 | Shanty Tramp                 | Shanty Tramp                 | Prieto, Joseph                | Joseph P. Mawra       | tt0060968 |
| 1746574844 | 1935 | 1935 | I Found Stella Parish        | I Found Stella Parish        | LeRoy, Mervyn                 | Mervyn LeRoy          | tt0026508 |
| 1746423797 | 1940 | 1940 | Charlie Chan's Murder Cruise | Charlie Chan's Murder Cruise | Forde, Eugene                 | Eugene Forde          | tt0032326 |
| 1746453840 | 1941 | 1941 | Bahama Passage               | Bahama Passage               | Griffith, Edward H.           | Edward H. Griffith    | tt0033372 |
| 1746491853 | 1945 | 1945 | The Bullfighters             | The Bullfighters             | St. Clair, Mal                | Malcolm St. Clair     | tt0037563 |
| 1746561472 | 1932 | 1932 | The Girl from Calgary        | The Girl from Calgary        | Whitman, Phil; d'Usseau, Leon | Phil Whitman          | tt0022940 |
| 1746568343 | 1933 | 1933 | The Mad Game                 | The Mad Game                 | Cummings, Irving              | Irving Cummings       | tt0024286 |
| 1746503508 | 1917 | 1916 | Pardners                     | Partners                     |                               | Hobart Henley         | tt0335342 |
| 1746565473 | 1952 | 1952 | Navajo                       | Navajo                       | Foster, Norman                | Norman Foster         | tt0044955 |
| 1746514749 | 1915 | 1915 | The Unwelcome Wife           | The Unwelcome Wife           | Abramson, Ivan                | Ivan Abramson         | tt0006203 |
| 1746492717 | 1947 | 1947 | Escape Me Never              | Escape Me Never              | Godfrey, Peter                | Peter Godfrey         | tt0039357 |
| 1746520568 | 1925 | 1925 | The Fate of a Flirt          | The Fate of a Flirt          | Strayer, Frank R.             | Frank R. Strayer      | tt0015796 |
| 1746392879 | 1985 | 1985 | Silver Bullet                | Silver Bullet                | Attias, Daniel                | Daniel Attias         | tt0090021 |
| 1746503636 | 1918 | 1918 | Wanted for Murder            | Wanted for Murder            | Crane, Frank                  | Frank Hall Crane      | tt0171911 |
| 1746567262 | 1933 | 1933 | The Big Bluff                | The Big Bluff                | Denny, Reginald               | Reginald Denny        | tt0023805 |
| 1746573802 | 1958 | 1958 | Dragstrip Riot               | Dragstrip Riot               | Bradley, David                | David Bradley         | tt0051555 |
| 1746581853 | 1951 | 1951 | Journey into Light           | Journey Into Light           | Heisler, Stuart               | Stuart Heisler        | tt0043692 |
| 1746524780 | 1916 | 1916 | Life's Whirlpool             | Life's Whirlpool             | O'Neil, Barry                 | Barry O'Neil          | tt0005733 |
| 1745293385 | 2006 | 2006 | Phat Girlz                   | Phat Girlz                   | Likke, Nnegest                | Nnegest Likké         | tt0490196 |
| 1746570355 | 1934 | 1934 | Wagon Wheels                 | Wagon Wheels                 | Barton, Charles               | Charles Barton        | tt0025954 |
| 1745373315 | 2002 | 2002 | Red Dragon                   | Red Dragon                   | Ratner, Brett                 | Brett Ratner          | tt0289765 |
| 1746571765 | 1932 | 1932 | The Purchase Price           | The Purchase Price           | Wellman, William A.           | William A. Wellman    | tt0023362 |
| 1746474529 | 1948 | 1948 | Crossed Trails               | Crossed Trails               | Hillyer, Lambert              | Lambert Hillyer       | tt0040256 |
| 1746486841 | 1920 | 1920 | Madonnas and Men             | Madonnas and Men             | Rolfe, B. A.                  | B.A. Rolfe            | tt0196730 |
| 1746465405 | 1942 | 1942 | The War Against Mrs. Hadley  | The War Against Mrs. Hadley  | Bucquet, Harold S.            | Harold S. Bucquet     | tt0035531 |
| 1746516297 | 1921 | 1921 | I Am Guilty                  | I Am Guilty                  | Nelson, Jack                  | Jack Nelson           | tt0012302 |

|                   |             |             |                                       |                                       |                                      |                                     |                  |
|-------------------|-------------|-------------|---------------------------------------|---------------------------------------|--------------------------------------|-------------------------------------|------------------|
| 1746569890        | 1960        | 1960        | Dinosaurus!                           | Dinosaurus!                           | Yeaworth, Irvin S.                   | Irvin S. Yeaworth Jr.               | tt0053768        |
| 1746496576        | 1918        | 1918        | Little Red Riding Hood                | Little Red Riding Hood                | Thayer, Otis B.                      | Otis Thayer                         | tt0186314        |
| 1746419927        | 1988        | 1988        | Elvira, Mistress of the Dark          | Elvira: Mistress of the Dark          | Signorelli, James                    | James Signorelli                    | tt0095088        |
| 1746562183        | 1954        | 1954        | Killers from Space                    | Killers from Space                    | Wilder, W. Lee                       | W. Lee Wilder                       | tt0047149        |
| 1746503317        | 1918        | 1918        | The Gun Woman                         | The Gun Woman                         | Borzage, Frank                       | Frank Borzage                       | tt0009137        |
| 1746583816        | 1930        | 1930        | Clancy in Wall Street                 | Clancy in Wall Street                 | Wilde, Ted                           | Ted Wilde                           | tt0020770        |
| 1745294039        | 2006        | 2006        | The Grudge 2                          | The Grudge 2                          | Shimizu, Takashi                     | Takashi Shimizu                     | tt0433386        |
| 1746185575        | 1965        | 1965        | All Men Are Apes!                     | All Men Are Apes!                     | Mawra, Joseph P.                     | Joseph P. Mawra                     | tt0058894        |
| 1746208381        | 1969        | 1969        | Support Your Local Sheriff!           | Support Your Local Sheriff!           | Kennedy, Burt                        | Burt Kennedy                        | tt0065051        |
| <b>1746408718</b> | <b>1982</b> | <b>1982</b> | <b>Forced Vengeance</b>               | <b>Forced Vengeance</b>               | <b>Fargo, James</b>                  | <b>James Fargo</b>                  | <b>tt0083960</b> |
| 1746583587        | 1929        | 1929        | The Sky Skidder                       | The Sky Skidder                       | Mitchell, Bruce                      | Bruce Mitchell                      | tt0020417        |
| 1746513105        | 1910        | 1910        | The Merry Wives of Windsor            | The Merry Wives of Windsor            |                                      | Francis Boggs                       | tt0221390        |
| 1746570139        | 1934        | 1934        | Hips, Hips, Hooray!                   | Hips, Hips, Hooray!                   | Sandrich, Mark                       | Mark Sandrich                       | tt0025254        |
| 1746584898        | 1939        | 1939        | The Kansas Terrors                    | The Kansas Terrors                    | Sherman, George                      | George Sherman                      | tt0031528        |
| 1746515379        | 1920        | 1920        | The Cradle of Courage                 | The Cradle of Courage                 | Hillyer, Lambert                     | William S. Hart                     | tt0011078        |
| 1746492860        | 1948        | 1948        | The Enchanted Valley                  | The Enchanted Valley                  | Tansey, Robert Emmett                | Robert Emmett Tansey                | tt0040320        |
| 1746533219        | 1915        | 1915        | The Miracle of Life                   | The Miracle of Life                   | Pollard, Harry                       | Harry A. Pollard                    | tt0005750        |
| 1746483878        | 1919        | 1919        | Out of the Shadow                     | Out of the Shadow                     | Chautard, Emile                      | Emile Chautard                      | tt0010543        |
| 1746565941        | 1953        | 1953        | Gentlemen Prefer Blondes              | Gentlemen Prefer Blondes              | Hawks, Howard                        | Howard Hawks                        | tt0045810        |
| 1746583384        | 1931        | 1931        | Kick In                               | Kick In                               | Wallace, Richard                     | Richard Wallace                     | tt0022022        |
| 1746585106        | 1930        | 1930        | Street of Chance                      | Street of Chance                      | Cromwell, John                       | John Cromwell                       | tt0021420        |
| 1746503983        | 1921        | 1921        | Everyman's Price                      | Everyman's Price                      | King, Burton                         | Burton L. King                      | tt0130670        |
| 1745342068        | 2008        | 2008        | Beverly Hills Chihuahua               | Beverly Hills Chihuahua               | Gosnell, Raja                        | Raja Gosnell                        | tt1014775        |
| 1746570232        | 1933        | 1933        | Straightaway                          | Straightaway                          | Brower, Otto                         | Otto Brower                         | tt0025837        |
| 1746467346        | 1917        | 1917        | The Accomplice                        | The Accomplice                        | Dean, Ralph                          | Ralph Dean                          | tt0007611        |
| 1746553883        | 1965        | 1965        | Brainstorm                            | Brainstorm                            | Conrad, William                      | William Conrad                      | tt0058990        |
| 1746576851        | 1932        | 1932        | Movie Crazy                           | Movie Crazy                           | Bruckman, Clyde                      | Clyde Bruckman                      | tt0023241        |
| 1746501273        | 1914        | 1914        | The Typhoon                           | The Typhoon                           | Barker, Reginald                     | Reginald Barker                     | tt0004740        |
| 1746520546        | 1926        | 1926        | The Bonanza Buckaroo                  | The Bonanza Buckaroo                  | Thorpe, Richard                      | Richard Thorpe                      | tt0016671        |
| 1746419793        | 1994        | 1994        | Cobb                                  | Cobb                                  | Shelton, Ron                         | Ron Shelton                         | tt0109450        |
| 1746560676        | 1932        | 1932        | Merrily We Go to Hell                 | Merrily We Go to Hell                 | Arzner, Dorothy                      | Dorothy Arzner                      | tt0023213        |
| 1746491849        | 1945        | 1945        | Frontier Gal                          | Frontier Gal                          | Lamont, Charles                      | Charles Lamont                      | tt0037721        |
| 1746474403        | 1945        | 1945        | The Phantom of 42nd Street            | The Phantom of 42nd Street            | Herman, Albert                       | Albert Herman                       | tt0037985        |
| 1746580912        | 1938        | 1938        | Rolling Caravans                      | Rolling Caravans                      | Levering, Joseph                     | Joseph Levering                     | tt0030690        |
| 1746516319        | 1921        | 1921        | Hold Your Horses                      | Hold Your Horses                      | Hopper, E. Mason                     | E. Mason Hopper                     | tt0012287        |
| 1746581997        | 1951        | 1951        | Tarzan's Peril                        | Tarzan's Peril                        | Haskin, Byron                        | Byron Haskin                        | tt0043695        |
| 1746475498        | 1947        | 1947        | Angel and the Badman                  | Angel and the Badman                  | Grant, James Edward                  | James Edward Grant                  | tt0039152        |
| 1746496811        | 1919        | 1919        | Virtuous Sinners                      | Virtuous Sinners                      | Flynn, Emmett J.                     | Emmett J. Flynn                     | tt0010847        |
| 1746515412        | 1922        | 1922        | Ashes                                 | Ashes                                 | Anderson, G. M.                      | Gilbert M. 'Broncho Billy' Anderson | tt0012907        |
| 1746492567        | 1947        | 1947        | The Crime Doctor's Gamble             | The Crime Doctor's Gamble             | Castle, William                      | William Castle                      | tt0039283        |
| 1745358071        | 2009        | 2009        | The Boys: The Sherman Brothers' Story | The Boys: The Sherman Brothers' Story | Sherman, Jeffrey C. ; Sherman, Grego | Gregory V. Sherman                  | tt1015971        |
| 1746574398        | 1958        | 1958        | Houseboat                             | Houseboat                             | Shavelson, Melville                  | Melville Shavelson                  | tt0051745        |
| 1746234103        | 1968        | 1968        | The Split                             | The Split                             | Fleming, Gordon                      | Gordon Fleming                      | tt0063636        |
| 1746577706        | 1937        | 1937        | The Good Old Soak                     | Good Old Soak                         | Ruben, J. Walter                     | J. Walter Ruben                     | tt0028946        |
| 1769977809        | 1985        | 1984        | George Stevens: A Filmmaker's Journey | George Stevens: A Filmmaker's Journey | Stevens, Jr., George                 | George Stevens Jr.                  | tt0087322        |
| 1746555252        | 1956        | 1956        | Westward Ho the Wagons!               | Westward Ho, the Wagons!              | Beaudine, William                    | William Beaudine                    | tt0049945        |
| 1746500638        | 1926        | 1926        | The Terror                            | The Terror                            | Smith, Clifford S.                   | Clifford Smith                      | tt0017452        |
| 1746572546        | 1910        | 1910        | A Discontented Woman                  | A Discontented Woman                  |                                      | Harry Solter                        | tt0361513        |
| 1746409975        | 1987        | 1987        | Dragnet                               | Dragnet                               | Mankiewicz, Tom                      | Tom Mankiewicz                      | tt0092925        |
| 1746507722        | 1949        | 1948        | Portrait of Jennie                    | Portrait of Jennie                    | Dieterle, William                    | William Dieterle                    | tt0040705        |
| 1746584171        | 1934        | 1934        | One Exciting Adventure                | One Exciting Adventure                | Frank, Ernst L.                      | Ernst L. Frank                      | tt0025597        |
| 1746566308        | 1958        | 1958        | Cop Hater                             | Cop Hater                             | Berke, William                       | William Berke                       | tt0051489        |
| 1769970492        | 1965        | 1965        | The Dirty Girls                       | The Dirty Girls                       | Metzger, Radley H.                   | Radley Metzger                      | tt0062895        |
| 1746524421        | 1923        | 1923        | The Drums of Jeopardy                 | The Drums of Jeopardy                 | Dillon, Edward                       | Edward Dillon                       | tt0014007        |
| 1746208150        | 1966        | 1966        | Cinerama's Russian Adventure          | Cinerama's Russian Adventure          | Kristi, Leonid; Karmen, Roman; Dolii | Boris Dolin                         | tt0219592        |
| 1746454207        | 1942        | 1942        | The Man in the Trunk                  | The Man in the Trunk                  | St. Clair, Malcolm                   | Malcolm St. Clair                   | tt0035030        |
| 1746498296        | 1922        | 1922        | Sherlock Brown                        | Sherlock Brown                        | Veiller, Bayard                      | Bayard Veiller                      | tt0013596        |

|            |      |      |                                 |                                 |                                 |                         |           |
|------------|------|------|---------------------------------|---------------------------------|---------------------------------|-------------------------|-----------|
| 1745309210 | 2007 | 2007 | I'm Not There                   | I'm Not There.                  | Haynes, Todd                    | Todd Haynes             | tt0368794 |
| 1769970833 | 1915 | 1915 | The Chinatown Mystery           | The Chinatown Mystery           | Barker, Reginald                | Reginald Barker         | tt0362504 |
| 1746532827 | 1915 | 1915 | The Last Concert                | The Last Concert                | Glickman, Ellis F.              | Ellis F. Glickman       | tt0005605 |
| 1746582764 | 1937 | 1937 | Paradise Isle                   | Paradise Isle                   | Collins, Arthur Greville        | Arthur Greville Collins | tt0029374 |
| 1746435136 | 1942 | 1942 | Give Out, Sisters               | Give Out, Sisters               | Cline, Edward F.                | Edward F. Cline         | tt0034797 |
| 1746514825 | 1927 | 1927 | California                      | California                      | Van Dyke, W. S.                 | W.S. Van Dyke           | tt0017727 |
| 1746580630 | 1938 | 1938 | Female Fugitive                 | Female Fugitive                 | Nigh, William                   | William Nigh            | tt0030126 |
| 1746454669 | 1943 | 1943 | White Savage                    | White Savage                    | Lubin, Arthur                   | Arthur Lubin            | tt0036534 |
| 1746555328 | 1957 | 1957 | Badlands of Montana             | Badlands of Montana             | Ullman, Daniel B.               | Daniel B. Ullman        | tt0050159 |
| 1746583259 | 1929 | 1929 | The Greene Murder Case          | The Greene Murder Case          | Tuttle, Frank                   | Frank Tuttle            | tt0019949 |
| 1746394182 | 1984 | 1983 | Bless Their Little Hearts       | Bless Their Little Hearts       | Woodberry, Billy                | Billy Woodberry         | tt0086977 |
| 1746508082 | 1925 | 1925 | The Fighting Sheriff            | The Fighting Sheriff            | McGowan, J. P.                  | J.P. McGowan            | tt0015813 |
| 1746501130 | 1916 | 1916 | The Supreme Sacrifice           | The Supreme Sacrifice           | Knoles, Harley; Belmore, Lionel | Lionel Belmore          | tt0007411 |
| 1746576903 | 1932 | 1932 | Play Girl                       | Play Girl                       | Enright, Ray                    | Ray Enright             | tt0023342 |
| 1746577352 | 1958 | 1958 | Lust to Kill                    | A Lust to Kill                  | Drake, Oliver                   | Oliver Drake            | tt0053026 |
| 1746454539 | 1999 | 1999 | Body Shots                      | Body Shots                      | Cristofer, Michael              | Michael Cristofer       | tt0172627 |
| 1745309479 | 2005 | 2005 | Emmanuel's Gift                 | Emmanuel's Gift                 | Lax, Lisa ; Stern, Nancy        | Lisa Lax                | tt0447016 |
| 1746217424 | 1966 | 1966 | Mister Buddwing                 | Mister Buddwing                 | Mann, Delbert                   | Delbert Mann            | tt0059453 |
| 1746582350 | 1951 | 1951 | Cause for Alarm!                | Cause for Alarm!                | Garnett, Tay                    | Tay Garnett             | tt0043390 |
| 1746520580 | 1927 | 1927 | Twelve Miles Out                | Twelve Miles Out                | Conway, Jack                    | Jack Conway             | tt0018513 |
| 1746502345 | 1916 | 1916 | Sold for Marriage               | Sold for Marriage               | Cabanne, William Christy        | Christy Cabanne         | tt0007368 |
| 1746499877 | 1923 | 1923 | Forgive and Forget              | Forgive and Forget              | Mitchell, Howard M.             | Howard M. Mitchell      | tt0014056 |
| 1746393635 | 1987 | 1987 | No Way Out                      | No Way Out                      | Donaldson, Roger                | Roger Donaldson         | tt0093640 |
| 1746566848 | 1933 | 1933 | Police Car 17                   | Police Car 17                   | Hillyer, Lambert                | Lambert Hillyer         | tt0024456 |
| 1746582676 | 1939 | 1939 | They Made Her a Spy             | They Made Her a Spy             | Hively, Jack                    | Jack Hively             | tt0032021 |
| 1746235889 | 1976 | 1976 | Jackson County Jail             | Jackson County Jail             | Miller, Michael                 | Michael Miller          | tt0074706 |
| 1746524089 | 1910 | 1910 | More Than His Duty              | More Than His Duty              | Dawley, J. Searle               | J. Searle Dawley        | tt1542707 |
| 1746584390 | 1936 | 1936 | My Marriage                     | My Marriage                     | Archainbaud, George             | George Archainbaud      | tt0028011 |
| 1746454809 | 1942 | 1942 | Freckles Comes Home             | Freckles Comes Home             | Yarbrough, Jean                 | Jean Yarbrough          | tt0034754 |
| 1746555669 | 1955 | 1955 | The Crooked Web                 | The Crooked Web                 | Juran, Nathan Hertz             | Nathan Juran            | tt0047962 |
| 1746182876 | 1910 | 1910 | Baby's First Tooth              | Baby's First Tooth              |                                 | Tom Ricketts            | tt1644508 |
| 1746563179 | 1952 | 1952 | Anything Can Happen             | Anything Can Happen             | Seaton, George                  | George Seaton           | tt0044366 |
| 1746555030 | 1956 | 1956 | The Naked Hills                 | The Naked Hills                 | Shaftel, Josef                  | Josef Shaftel           | tt0049540 |
| 1746503997 | 1918 | 1918 | Virtuous Wives                  | Virtuous Wives                  | Tucker, George Loane            | George Loane Tucker     | tt0009765 |
| 1746574775 | 1933 | 1933 | The King's Vacation             | The King's Vacation             | Adolfi, John G.                 | John G. Adolfi          | tt0024221 |
| 1746216959 | 1966 | 1966 | Fantastic Voyage                | Fantastic Voyage                | Fleischer, Richard              | Richard Fleischer       | tt0060397 |
| 1746455110 | 1999 | 1999 | Breakfast of Champions          | Breakfast of Champions          | Rudolph, Alan                   | Alan Rudolph            | tt0120618 |
| 1746464896 | 1944 | 1944 | Take It or Leave It             | Take It or Leave It             | Stoloff, Benjamin               | Benjamin Stoloff        | tt0037341 |
| 1746483850 | 1918 | 1918 | The Mysterious Client           | The Mysterious Client           | Wright, Fred E.                 | Fred E. Wright          | tt0009411 |
| 1746499865 | 1946 | 1946 | The Bride Wore Boots            | The Bride Wore Boots            | Pichel, Irving                  | Irving Pichel           | tt0038383 |
| 1746503489 | 1919 | 1919 | True Heart Susie                | True Heart Susie                | Griffith, D. W.                 | D.W. Griffith           | tt0010806 |
| 1746524171 | 1915 | 1915 | The Chorus Lady                 | The Chorus Lady                 | Reicher, Frank                  | Frank Reicher           | tt0005092 |
| 1746491882 | 1947 | 1947 | Riffraff                        | Riffraff                        | Tetzlaff, Ted                   | Ted Tetzlaff            | tt0039772 |
| 1746436678 | 1941 | 1941 | Cadet Girl                      | Cadet Girl                      | McCarey, Ray                    | Ray McCarey             | tt0033445 |
| 1769970035 | 1911 | 1911 | The Foreman's Courage           | The Foreman's Courage           |                                 | Thomas H. Ince          | tt0358484 |
| 1746569779 | 1958 | 1958 | Hong Kong Confidential          | Hong Kong Confidential          | Cahn, Edward L.                 | Edward L. Cahn          | tt0051736 |
| 1746424389 | 1941 | 1941 | The Lone Rider in Frontier Fury | The Lone Rider in Frontier Fury | Newfield, Sam                   | Sam Newfield            | tt0033845 |
| 1746421737 | 1996 | 1996 | The English Patient             | The English Patient             | Minghella, Anthony              | Anthony Minghella       | tt0116209 |
| 1746570353 | 1952 | 1952 | Smoky Canyon                    | Smoky Canyon                    | Sears, Fred F.                  | Fred F. Sears           | tt0045159 |
| 1745359497 | 2010 | 2010 | Freakonomics                    | Freakonomics                    |                                 | Heidi Ewing             | tt1152822 |
| 1746465075 | 1945 | 1945 | Both Barrels Blazing            | Both Barrels Blazing            | Abrahams, Derwin                | Derwin Abrahams         | tt0036666 |
| 1746509328 | 1950 | 1950 | Champagne for Caesar            | Champagne for Caesar            | Whorf, Richard B.               | Richard Whorf           | tt0042325 |
| 1745359137 | 2002 | 2002 | Sorority Boys                   | Sorority Boys                   | Wolodarsky, Wallace             | Wallace Wolodarsky      | tt0279781 |
| 1746520509 | 1926 | 1925 | Mistaken Orders                 | Mistaken Orders                 | McGowan, J. P.                  | J.P. McGowan            | tt0017161 |
| 1746574450 | 1933 | 1933 | Saturday's Millions             | Saturday's Millions             | Sedgwick, Edward                | Edward Sedgwick         | tt0024523 |
| 1746454238 | 1995 | 1995 | Funny Bones                     | Funny Bones                     | Chelsom, Peter                  | Peter Chelsom           | tt0113133 |
| 1745302480 | 2005 | 2005 | The Aristocrats                 | The Aristocrats                 | Provenza, Paul                  | Paul Provenza           | tt0436078 |

|            |      |      |                                  |                                  |                                    |                      |            |
|------------|------|------|----------------------------------|----------------------------------|------------------------------------|----------------------|------------|
| 1746410379 | 1986 | 1986 | One Crazy Summer                 | One Crazy Summer                 | Holland, Savage Steve              | Savage Steve Holland | tt0091680  |
| 1746520725 | 1950 | 1950 | California Passage               | California Passage               | Kane, Joseph                       | Joseph Kane          | tt0042299  |
| 1746580737 | 1939 | 1939 | Son of Frankenstein              | Son of Frankenstein              | Lee, Rowland V.                    | Rowland V. Lee       | tt0031951  |
| 1746573944 | 1963 | 1963 | Irma La Douce                    | Irma la Douce                    | Wilder, Billy                      | Billy Wilder         | tt0057187  |
| 1769976164 | 1928 | 1928 | Cleopatra                        | Cleopatra                        | Neill, R. William                  | Roy William Neill    | tt0428392  |
| 1746560863 | 1932 | 1932 | Trapped in Tia Juana             | Trapped in Tia Juana             | Fox, Wallace W.                    | Wallace Fox          | tt0283071  |
| 1746270344 | 1978 | 1978 | Harper Valley P. T. A.           | Harper Valley P.T.A.             | Bennett, Richard                   | Richard C. Bennett   | tt0077660  |
| 1746439412 | 1943 | 1942 | Prelude to War                   | Prelude to War                   |                                    | Frank Capra          | tt0035209  |
| 1746495959 | 1919 | 1919 | His Wife's Friend                | His Wife's Friend                | De Grasse, Joseph                  | Joseph De Grasse     | tt0190458  |
| 1746562112 | 1953 | 1953 | The Moon Is Blue                 | The Moon Is Blue                 | Preminger, Otto                    | Otto Preminger       | tt0046094  |
| 1746433727 | 1991 | 1991 | Point Break                      | Point Break                      | Bigelow, Kathryn                   | Kathryn Bigelow      | tt0102685  |
| 1746217001 | 1967 | 1967 | The Caper of the Golden Bulls    | The Caper of the Golden Bulls    | Rouse, Russell                     | Russell Rouse        | tt0060209  |
| 1746503328 | 1917 | 1917 | Her Own People                   | Her Own People                   | Sidney, Scott                      | Scott Sidney         | tt01175725 |
| 1746454516 | 1996 | 1996 | Extreme Measures                 | Extreme Measures                 | Apted, Michael                     | Michael Apted        | tt0116259  |
| 1746576683 | 1932 | 1932 | Winner Take All                  | Winner Take All                  | Del Ruth, Roy                      | Roy Del Ruth         | tt0023701  |
| 1746474974 | 1943 | 1943 | The Underdog                     | The Underdog                     | Nigh, William                      | William Nigh         | tt0036474  |
| 1746248146 | 1966 | 1966 | The Big T.N.T. Show              | The Big T.N.T. Show              | Peerce, Larry                      | Larry Peerce         | tt0060167  |
| 1746437295 | 1942 | 1942 | Dudes Are Pretty People          | Dudes Are Pretty People          | Roach, Hal                         | Hal Roach Jr.        | tt0034686  |
| 1746569922 | 1957 | 1957 | Don't Go Near the Water          | Don't Go Near the Water          | Walters, Charles                   | Charles Walters      | tt0050327  |
| 1746424184 | 1942 | 1942 | Whistling in Dixie               | Whistling in Dixie               | Simon, S. Sylvan                   | S. Sylvan Simon      | tt0035552  |
| 1746455809 | 1999 | 1999 | Deuce Bigalow: Male Gigolo       | Deuce Bigalow: Male Gigolo       | Mitchell, Mike                     | Mike Mitchell        | tt0205000  |
| 1746571278 | 1933 | 1932 | Sister to Judas                  | Sister to Judas                  | Hopper, E. Mason                   | E. Mason Hopper      | tt0024568  |
| 1746453456 | 1943 | 1943 | Jive Junction                    | Jive Junction                    | Ulmer, Edgar G.                    | Edgar G. Ulmer       | tt0034917  |
| 1745373515 | 2004 | 2004 | Soul Plane                       | Soul Plane                       | Terrero, Jessy                     | Jessy Terrero        | tt0367085  |
| 1746219588 | 1974 | 1974 | Lenny                            | Lenny                            | Fosse, Bob                         | Bob Fosse            | tt0071746  |
| 1746465333 | 1946 | 1946 | Two-Fisted Stranger              | Two Fisted Stranger              | Nazarro, Ray                       | Ray Nazarro          | tt0039057  |
| 1745342024 | 2004 | 2004 | In Good Company                  | In Good Company                  | Weitz, Paul                        | Paul Weitz           | tt0385267  |
| 1745293252 | 2007 | 2007 | Shoot 'Em Up                     | Shoot 'Em Up                     | Davis, Michael                     | Michael Davis        | tt0465602  |
| 1746475021 | 1948 | 1948 | The Challenge                    | The Challenge                    | Yarbrough, Jean                    | Jean Yarbrough       | tt0040224  |
| 1746503331 | 1919 | 1919 | The Littlest Scout               | The Littlest Scout               | Blackton, Paula                    | Paula Blackton       | tt0010374  |
| 1769974394 | 1916 | 1916 | The Fate of America              | The Fate of America              | Ellis, Robert                      | Robert Ellis         | tt3155452  |
| 1746424240 | 1940 | 1940 | My Son, My Son!                  | My Son, My Son!                  | Vidor, Charles                     | Charles Vidor        | tt0032831  |
| 1745282742 | 2007 | 2007 | Freedom Writers                  | Freedom Writers                  | LaGravenese, Richard               | Richard LaGravenese  | tt0463998  |
| 1746524921 | 1923 | 1924 | Trail of the Law                 | The Trail of the Law             | Apfel, Oscar                       | Oscar Apfel          | tt0015427  |
| 1745293567 | 2005 | 2004 | A League of Ordinary Gentlemen   | A League of Ordinary Gentlemen   | Browne, Christopher                | Christopher Browne   | tt0430289  |
| 1746422908 | 1997 | 1996 | Johns                            | Johns                            | Silver, Scott                      | Scott Silver         | tt0116714  |
| 1746509490 | 1948 | 1948 | The Treasure of the Sierra Madre | The Treasure of the Sierra Madre | Huston, John                       | John Huston          | tt0040897  |
| 1746562081 | 1957 | 1957 | Designing Woman                  | Designing Woman                  | Minnelli, Vincente                 | Vincente Minnelli    | tt0050306  |
| 1746575934 | 1931 | 1931 | Texas Ranger                     | The Texas Ranger                 | Lederman, D. Ross                  | D. Ross Lederman     | tt0022473  |
| 1745272190 | 2000 | 2000 | Paragraph 175                    | Paragraph 175                    | Epstein, Rob; Friedman, Jeffrey    | Rob Epstein          | tt0236576  |
| 1746433971 | 1992 | 1992 | Claire of the Moon               | Claire of the Moon               | Conn, Nicole                       | Nicole Conn          | tt0103977  |
| 1746210644 | 1972 | 1972 | Across 110th Street              | Across 110th Street              | Shear, Barry                       | Barry Shear          | tt0068168  |
| 1746454557 | 1997 | 1997 | Starship Troopers                | Starship Troopers                | Verhoeven, Paul                    | Paul Verhoeven       | tt0120201  |
| 1746485557 | 1919 | 1919 | The Cambric Mask                 | The Cambric Mask                 | Terriss, Tom                       | Tom Terriss          | tt0009981  |
| 1746514689 | 1915 | 1915 | The Mummy and the Humming Bird   | The Mummy and the Humming Bird   | Durkin, James                      | James Durkin         | tt0005786  |
| 1746579058 | 1959 | 1959 | Thunder in the Sun               | Thunder in the Sun               | Rouse, Russell                     | Russell Rouse        | tt0053359  |
| 1746570426 | 1933 | 1933 | Don't Bet on Love                | Don't Bet on Love                | Roth, Murray                       | Murray Roth          | tt0023957  |
| 1746509180 | 1926 | 1926 | Dancing Mothers                  | Dancing Mothers                  | Brenon, Herbert                    | Herbert Brenon       | tt0016762  |
| 1746580725 | 1937 | 1937 | Telephone Operator               | Telephone Operator               | Pembroke, Scott                    | Scott Pembroke       | tt0030839  |
| 1746520112 | 1924 | 1924 | The Story Without a Name         | The Story Without a Name         | Willat, Irvin                      | Irvin Willat         | tt0015371  |
| 1746515846 | 1922 | 1922 | The Man from Beyond              | The Man from Beyond              | King, Burton                       | Burton L. King       | tt0013367  |
| 1769970574 | 1968 | 1968 | For Single Swingers Only         | For Single Swingers Only         | Davis, Don                         | Donald A. Davis      | tt0137552  |
| 1746438942 | 1945 | 1945 | Christmas in Connecticut         | Christmas in Connecticut         | Godfrey, Peter                     | Peter Godfrey        | tt0037595  |
| 1746580850 | 1938 | 1938 | The Adventures of Robin Hood     | The Adventures of Robin Hood     | Curtiz, Michael; Keighley, William | Michael Curtiz       | tt0029843  |
| 1746421659 | 1993 | 1993 | For Love or Money                | For Love or Money                | Sonnenfeld, Barry                  | Barry Sonnenfeld     | tt0106941  |
| 1746508370 | 1924 | 1924 | Welcome Stranger                 | Welcome Stranger                 | Young, James                       | James Young          | tt0015476  |
| 1746577805 | 1934 | 1934 | Fugitive Road                    | Fugitive Road                    | Strayer, Frank                     | Frank R. Strayer     | tt0025152  |

|            |      |      |                                          |                                          |                       |                     |            |
|------------|------|------|------------------------------------------|------------------------------------------|-----------------------|---------------------|------------|
| 1746434302 | 1995 | 1995 | Get Shorty                               | Get Shorty                               | Sonnenfeld, Barry     | Barry Sonnenfeld    | tt0113161  |
| 1746500359 | 1925 | 1925 | Don Q, Son of Zorro                      | Don Q Son of Zorro                       | Crisp, Donald         | Donald Crisp        | tt0015758  |
| 1769970089 | 1912 | 1912 | John Sterling, Alderman                  | John Sterling, Alderman                  |                       | James Kirkwood      | tt0327994  |
| 1746421273 | 1940 | 1940 | Wagons Westward                          | Wagons Westward                          | Landers, Lew          | Lew Landers         | tt0033235  |
| 1746569566 | 1955 | 1954 | Destry                                   | Destry                                   | Marshall, George      | George Marshall     | tt0046906  |
| 1746577501 | 1935 | 1935 | Bordertown                               | Bordertown                               | Mayo, Archie          | Archie Mayo         | tt0026129  |
| 1746581643 | 1928 | 1928 | Secrets of the Range                     | Secrets of the Range                     | Horner, Robert J.     | Robert J. Horner    | tt0019364  |
| 1746574622 | 1935 | 1935 | Broadway Hostess                         | Broadway Hostess                         | McDonald, Frank       | Frank McDonald      | tt0026143  |
| 1746566155 | 1955 | 1955 | Target Zero                              | Target Zero                              | Jones, Harmon         | Harmon Jones        | tt0048698  |
| 1746435288 | 1998 | 1998 | Gods and Monsters                        | Gods and Monsters                        | Condon, Bill          | Bill Condon         | tt0120684  |
| 1746573060 | 1931 | 1931 | Gentleman's Fate                         | Gentleman's Fate                         | LeRoy, Mervyn         | Mervyn LeRoy        | tt0021906  |
| 1746583218 | 1929 | 1929 | The Isle of Lost Ships                   | The Isle of Lost Ships                   | Willat, Irvin         | Irvin Willat        | tt0020032  |
| 1745341239 | 2008 | 2008 | Hamlet 2                                 | Hamlet 2                                 | Fleming, Andrew       | Andrew Fleming      | tt1104733  |
| 1746582845 | 1937 | 1937 | Step Lively, Jeeves!                     | Step Lively, Jeeves!                     | Forde, Eugene         | Eugene Forde        | tt0029609  |
| 1746566140 | 1953 | 1953 | Oiltown U.S.A.                           | Oiltown, U.S.A.                          | Ross, Dick            | Dick Ross           | tt0991279  |
| 1746520417 | 1926 | 1926 | Hair Trigger Baxter                      | Hair Trigger Baxter                      | Nelson, Jack          | Jack Nelson         | tt0133830  |
| 1746467424 | 1917 | 1917 | The Mysterious Mr. Tiller                | The Mysterious Mr. Tiller                | Julian, Rupert        | Rupert Julian       | tt0008350  |
| 1746424448 | 1943 | 1943 | No Place for a Lady                      | No Place for a Lady                      | Hogan, James          | James P. Hogan      | tt0036207  |
| 1746410420 | 1983 | 1983 | Tough Enough                             | Tough Enough                             | Fleischer, Richard O. | Richard Fleischer   | tt0086461  |
| 1746574919 | 1933 | 1932 | Women Won't Tell                         | Women Won't Tell                         | Thorpe, Richard       | Richard Thorpe      | tt0024784  |
| 1746584736 | 1928 | 1928 | Across the Plains                        | Across the Plains                        | Horner, Robert J.     | Robert J. Horner    | tt0018617  |
| 1746580852 | 1936 | 1936 | Educating Father                         | Educating Father                         | Tinling, James        | James Tinling       | tt0027567  |
| 1746574408 | 1960 | 1960 | Esther and the King                      | Esther and the King                      | Walsh, Raoul          | Raoul Walsh         | tt0053800  |
| 1746419205 | 1981 | 1981 | Mommie Dearest                           | Mommie Dearest                           | Perry, Frank          | Frank Perry         | tt0082766  |
| 1746437924 | 1941 | 1941 | Tanks a Million                          | Tanks a Million                          | Guiol, Fred           | Fred Guiol          | tt0034264  |
| 1746440172 | 1999 | 1999 | The Muse                                 | The Muse                                 | Brooks, Albert        | Albert Brooks       | tt0164108  |
| 1746524312 | 1922 | 1922 | Fascination                              | Fascination                              | Leonard, Robert Z.    | Robert Z. Leonard   | tt0013119  |
| 1769971174 | 1969 | 1969 | The Secret Sex Lives of Romeo and Juliet | The Secret Sex Lives of Romeo and Juliet | Stootsberry, A. P.    | Peter Perry Jr.     | tt00127819 |
| 1746420776 | 1990 | 1990 | Home Alone                               | Home Alone                               | Columbus, Chris       | Chris Columbus      | tt0099785  |
| 1746514667 | 1914 | 1914 | The Lion and the Mouse                   | The Lion and the Mouse                   | O'Neil, Barry         | Barry O'Neil        | tt0004232  |
| 1746424035 | 1940 | 1940 | Dr. Kildare's Crisis                     | Dr. Kildare's Crisis                     | Bucquet, Harold S.    | Harold S. Bucquet   | tt0032415  |
| 1746185151 | 1965 | 1965 | Satan's Bed                              | Satan's Bed                              | Smith, Marshall       | Michael Findlay     | tt0059679  |
| 1746580797 | 1935 | 1935 | The Calling of Dan Matthews              | The Calling of Dan Matthews              | Rosen, Phil           | Phil Rosen          | tt0027494  |
| 1745357704 | 2009 | 2009 | Home                                     | The Hole                                 | Haverstick, Mary      | Joe Dante           | tt1085779  |
| 1746475983 | 1945 | 1945 | Week-End at the Waldorf                  | Week End at the Waldorf                  | Leonard, Robert Z.    | Robert Z. Leonard   | tt0038239  |
| 1746466926 | 1917 | 1917 | The Hunting of the Hawk                  | The Hunting of the Hawk                  | Fitzmaurice, George   | George Fitzmaurice  | tt0008127  |
| 1746210613 | 1971 | 1971 | Johnny Got His Gun                       | Johnny Got His Gun                       | Trumbo, Dalton        | Dalton Trumbo       | tt0067277  |
| 1746491964 | 1945 | 1946 | One Way to Love                          | One Way to Love                          | Enright, Ray          | Ray Enright         | tt0038803  |
| 1746580382 | 1937 | 1936 | The Lash of the Penitentes               | Lash of the Penitentes                   | Carroll, Zelma        | Roland Price        | tt0029114  |
| 1746583426 | 1929 | 1929 | Evidence                                 | Evidence                                 | Adolfi, John G.       | John G. Adolfi      | tt0019859  |
| 1746487281 | 1919 | 1919 | Erstwhile Susan                          | Erstwhile Susan                          | Robertson, John S.    | John S. Robertson   | tt0010090  |
| 1746501060 | 1916 | 1916 | The Twinkler                             | The Twinkler                             | Sloman, Edward        | Edward Sloman       | tt0007485  |
| 1746578851 | 1960 | 1960 | Guns of the Timberland                   | Guns of the Timberland                   | Webb, Robert D.       | Robert D. Webb      | tt0053884  |
| 1746561958 | 1957 | 1957 | Men in War                               | Men in War                               | Mann, Anthony         | Anthony Mann        | tt0050699  |
| 1745340000 | 2001 | 2001 | The Majestic                             | The Majestic                             | Darabont, Frank       | Frank Darabont      | tt0268995  |
| 1746583139 | 1934 | 1934 | Great Expectations                       | Great Expectations                       | Walker, Stuart        | Stuart Walker       | tt0025202  |
| 1746491838 | 1948 | 1948 | Bill and Co                              | Bill and Co                              | Reisner, Dean         | Dean Riesner        | tt0039188  |
| 1746495851 | 1920 | 1920 | Lady Rose's Daughter                     | Lady Rose's Daughter                     | Ford, Hugh            | Hugh Ford           | tt0011383  |
| 1746503672 | 1919 | 1919 | A Romance of Happy Valley                | A Romance of Happy Valley                | Griffith, D. W.       | D. W. Griffith      | tt0009559  |
| 1746434026 | 1992 | 1992 | Big Girls Don't Cry... They Get Even     | Big Girls Don't Cry... They Get Even     | Silver, Joan Micklin  | Joan Micklin Silver | tt0101444  |
| 1745342228 | 2008 | 2008 | Quid Pro Quo                             | Quid Pro Quo                             | Brooks, Carlos        | Carlos Brooks       | tt0414426  |
| 1745340239 | 2004 | 2004 | Primer                                   | Primer                                   | Carruth, Shane        | Shane Carruth       | tt0390384  |
| 1746423345 | 1996 | 1996 | Scream                                   | Scream                                   | Craven, Wes           | Wes Craven          | tt0117571  |
| 1746554591 | 1964 | 1964 | The Killers                              | The Killers                              | Siegel, Donald        | Don Siegel          | tt0058262  |
| 1746514299 | 1915 | 1915 | Cora                                     | Coral                                    | Carewe, Edwin         | Henry MacRae        | tt0005136  |
| 1746571253 | 1934 | 1934 | You Can't Buy Everything                 | You Can't Buy Everything                 | Riesner, Charles F.   | Charles Reisner     | tt0026015  |
| 1746577107 | 1951 | 1951 | The Family Secret                        | The Family Secret                        | Levin, Henry          | Henry Levin         | tt0043521  |

|            |      |      |                               |                               |                                     |                                     |           |
|------------|------|------|-------------------------------|-------------------------------|-------------------------------------|-------------------------------------|-----------|
| 1746491738 | 1946 | 1946 | G. I. War Brides              | G.I. War Brides               | Blair, George                       | George Blair                        | tt0038545 |
| 1746492868 | 1946 | 1946 | Whistle Stop                  | Whistle Stop                  | Moguy, Leonide                      | Léonide Moguy                       | tt0039101 |
| 1746581946 | 1929 | 1929 | Midnight on the Barbary Coast | Midnight on the Barbary Coast | Horner, Robert J.                   | Robert J. Horner                    | tt0020170 |
| 1746577397 | 1958 | 1958 | Wink of an Eye                | Wink of an Eye                | Jones, Winston                      | Winston Jones                       | tt0052399 |
| 1746582667 | 1937 | 1937 | Federal Bullets               | Federal Bullets               | Brown, Karl                         | Karl Brown                          | tt0028857 |
| 1746410165 | 1990 | 1990 | The Rookie                    | The Rookie                    | Eastwood, Clint                     | Clint Eastwood                      | tt0100514 |
| 1746512418 | 1916 | 1916 | The Unborn                    | The Unborn                    | Fair, Otis B.                       | Otis Thayer                         | tt0159071 |
| 1746564827 | 1952 | 1952 | The Wild Heart                | The Wild Heart                | Powell, Michael; Pressburger, Emeri | Michael Powell                      | tt0045328 |
| 1746503417 | 1918 | 1918 | The Clutch of Circumstance    | The Clutch of Circumstance    | Henry-Houry                         | Henry Houry                         | tt0008969 |
| 1746520585 | 1927 | 1927 | The Thirteenth Hour           | The Thirteenth Hour           | Franklin, Chester                   | Chester M. Franklin                 | tt0018480 |
| 1745341839 | 2009 | 2009 | A Perfect Getaway             | A Perfect Getaway             | Twohy, David                        | David Twohy                         | tt0971209 |
| 1746182852 | 1910 | 1910 | Big Medicine                  | Big Medicine                  |                                     |                                     | tt1386592 |
| 1746577890 | 1938 | 1938 | The Affairs of Annabel        | The Affairs of Annabel        | Stoloff, Ben                        | Benjamin Stoloff                    | tt0029845 |
| 1746524508 | 1923 | 1923 | The Virginian                 | The Virginian                 | Forman, Tom                         | Tom Forman                          | tt0014582 |
| 1746566738 | 1952 | 1952 | Pat and Mike                  | Pat and Mike                  | Cukor, George                       | George Cukor                        | tt0045012 |
| 1746520306 | 1950 | 1950 | Cargo to Capetown             | Cargo to Capetown             | McEvoy, Earl                        | Earl McEvoy                         | tt0042314 |
| 1746582147 | 1928 | 1928 | The Power of the Press        | The Power of the Press        | Capra, Frank R.                     | Frank Capra                         | tt0019290 |
| 1746514583 | 1915 | 1915 | The Mill on the Floss         | The Mill on the Floss         | Moore, W. Eugene                    | Eugene Moore                        | tt0005745 |
| 1746514251 | 1915 | 1915 | Divorced                      | Divorced                      | Warren, Edward                      | Edward Warren                       | tt0005202 |
| 1746185323 | 1965 | 1965 | The Very Naked Canvas         | The Very Naked Canvas         | Jacobsen, Jerome                    | Jerome Jacobsen                     | tt0291543 |
| 1746582568 | 1937 | 1937 | Public Wedding                | Public Wedding                | Grinde, Nick                        | Nick Grinde                         | tt0029446 |
| 1746567010 | 1952 | 1952 | Young Man With Ideas          | Young Man with Ideas          | Leisen, Mitchell                    | Mitchell Leisen                     | tt0045347 |
| 1746567098 | 1933 | 1933 | Arizona to Broadway           | Arizona to Broadway           | Tinling, James                      | James Tinling                       | tt0023764 |
| 1746476197 | 1948 | 1948 | A Foreign Affair              | A Foreign Affair              | Wilder, Billy                       | Billy Wilder                        | tt0040367 |
| 1746585122 | 1928 | 1928 | The Desert Bride              | The Desert Bride              | Lang, Walter                        | Walter Lang                         | tt0018822 |
| 1746504532 | 1920 | 1920 | Deep Waters                   | Deep Waters                   | Tourneur, Maurice                   | Maurice Tourneur                    | tt0011103 |
| 1746453648 | 1940 | 1940 | Stage to Chino                | Stage to Chino                | Killy, Edward                       | Edward Killy                        | tt0033098 |
| 1746584032 | 1938 | 1938 | You Can't Take It with You    | You Can't Take It with You    | Capra, Frank                        | Frank Capra                         | tt0030993 |
| 1746394716 | 1987 | 1987 | Return to Horror High         | Return to Horror High         | Froehlich, Bill                     | Bill Froehlich                      | tt0093854 |
| 1746454647 | 1941 | 1941 | Back Street                   | Back Street                   | Stevenson, Robert                   | Robert Stevenson                    | tt0033365 |
| 1746495852 | 1917 | 1917 | The Square Deal Man           | The Square Deal Man           | Hart, William S.                    | William S. Hart                     | tt0008623 |
| 1746582162 | 1928 | 1928 | Queen of the Chorus           | Queen of the Chorus           | Hunt, Charles J.                    | Charles J. Hunt                     | tt0019299 |
| 1746437982 | 1942 | 1942 | She's in the Army             | She's in the Army             | Yarbrough, Jean                     | Jean Yarbrough                      | tt0035313 |
| 1746515026 | 1910 | 1910 | Under Western Skies           | Under Western Skies           | Barker, Reginald                    | Gilbert M. 'Broncho Billy' Anderson | tt0001434 |
| 1746512430 | 1927 | 1927 | Brass Knuckles                | Brass Knuckles                | Bacon, Lloyd                        | Lloyd Bacon                         | tt0017696 |
| 1746474510 | 1947 | 1947 | Blaze of Noon                 | Blaze of Noon                 | Farrow, John                        | John Farrow                         | tt0039196 |
| 1746555747 | 1955 | 1955 | Unchained                     | Unchained                     | Bartlett, Hall                      | Hall Bartlett                       | tt0048762 |
| 1746583967 | 1940 | 1940 | Marines Fly High              | The Marines Fly High          | Nicholls, George; Stoloff, Ben      | George Nichols Jr.                  | tt0032761 |
| 1746437352 | 1941 | 1941 | Blondie Goes Latin            | Blondie Goes Latin            | Strayer, Frank R.                   | Frank R. Strayer                    | tt0033403 |
| 1746583866 | 1931 | 1931 | The Miracle Woman             | The Miracle Woman             | Capra, Frank                        | Frank Capra                         | tt0022153 |
| 1746408865 | 1988 | 1988 | Hairspray                     | Hairspray                     | Waters, John                        | John Waters                         | tt0095270 |
| 1746578062 | 1937 | 1937 | You're a Sweetheart           | You're a Sweetheart           | Butler, David                       | David Butler                        | tt0029809 |
| 1746580802 | 1939 | 1939 | Meet Dr. Christian            | Meet Dr. Christian            | Vorhaus, Bernard                    | Bernard Vorhaus                     | tt0031635 |
| 1745342830 | 2004 | 2004 | Riding Giants                 | Riding Giants                 | Peralta, Stacy                      | Stacy Peralta                       | tt0389326 |
| 1746218817 | 1973 | 1973 | The Crazyes                   | The Crazyes                   | Romero, George A.                   | George A. Romero                    | tt0069895 |
| 1745342510 | 2001 | 2001 | Heartbreakers                 | Heartbreakers                 | Mirkin, David                       | David Mirkin                        | tt0125022 |
| 1746570077 | 1933 | 1933 | Havana Widows                 | Havana Widows                 | Enright, Ray                        | Ray Enright                         | tt0024092 |
| 1746562090 | 1953 | 1953 | The Homesteaders              | The Homesteaders              | Collins, Lewis                      | Lewis D. Collins                    | tt0179221 |
| 1746555476 | 1957 | 1957 | The Tall Stranger             | The Tall Stranger             | Carr, Thomas                        | Thomas Carr                         | tt0051046 |
| 1745282813 | 2007 | 2007 | The Jane Austen Book Club     | The Jane Austen Book Club     | Swicord, Robin                      | Robin Swicord                       | tt0866437 |
| 1746568138 | 1933 | 1933 | Victims of Persecution        | Victims of Persecution        | Pollard, Bud                        | Bud Pollard                         | tt0156169 |
| 1746578540 | 1962 | 1962 | We'll Bury You!               | We'll Bury You!               |                                     |                                     | tt6152518 |
| 1769969828 | 1912 | 1912 | The Call of the Desert        | The Call of the Desert        |                                     |                                     | tt0345006 |
| 1746585127 | 1930 | 1930 | Oh Sailor Behave              | Oh, Sailor Behave!            | Mayo, Archie                        | Archie Mayo                         | tt0021200 |
| 1746578562 | 1959 | 1959 | Hey Boy! Hey Girl!            | Hey Boy! Hey Girl!            | Rich, David Lowell                  | David Lowell Rich                   | tt0052887 |
| 1746570289 | 1952 | 1952 | Woman in the Dark             | Woman in the Dark             | Blair, George                       | George Blair                        | tt0045336 |
| 1746585419 | 1939 | 1939 | Hawaiian Nights               | Hawaiian Nights               | Rogell, Albert S.                   | Albert S. Rogell                    | tt0031408 |



|            |      |      |                                       |                                       |                                     |                      |           |
|------------|------|------|---------------------------------------|---------------------------------------|-------------------------------------|----------------------|-----------|
| 1746217460 | 1966 | 1966 | Torn Curtain                          | Torn Curtain                          | Hitchcock, Alfred                   | Alfred Hitchcock     | tt0061107 |
| 1746198081 | 1970 | 1970 | Equinox                               | Equinox                               |                                     | Jack Woods           | tt0067055 |
| 1746435506 | 1941 | 1941 | Outlaws of Cherokee Trail             | Outlaws of Cherokee Trail             | Orlebeck, Les                       | Lester Orlebeck      | tt0033988 |
| 1746487476 | 1918 | 1918 | Morgan's Raiders                      | Morgan's Raiders                      | Lucas, Wilfred; Meredyth, Bess      | Wilfred Lucas        | tt0009393 |
| 1769971201 | 1969 | 1969 | Over 18, ... and Ready!               | Over 18... and Ready!                 | Allen, Lloyd                        | Lloyd Allen          | tt0131200 |
| 1746572221 | 1931 | 1931 | The Night Angel                       | The Night Angel                       | Goulding, Edmund                    | Edmund Goulding      | tt0022205 |
| 1745293993 | 2007 | 2006 | Ten 'Til Noon                         | Ten 'til Noon                         | Storm, Scott                        | Scott Storm          | tt0438486 |
| 1769970630 | 1968 | 1968 | The Procurer                          | The Procurer                          | Place, Graham                       | Graham Place         | tt0063461 |
| 1746584340 | 1936 | 1936 | Bulldog Edition                       | Bulldog Edition                       | Lamont, Charles                     | Charles Lamont       | tt0027406 |
| 1746569498 | 1954 | 1954 | Dial M for Murder                     | Dial M for Murder                     | Hitchcock, Alfred                   | Alfred Hitchcock     | tt0046912 |
| 1746475904 | 1947 | 1947 | Hollywood Barn Dance                  | Hollywood Barn Dance                  | Ray, Bernard B.                     | Bernard B. Ray       | tt0177841 |
| 1746554061 | 1964 | 1964 | He Rides Tall                         | He Rides Tall                         | Springsteen, R. G.                  | R.G. Springsteen     | tt0058186 |
| 1746582927 | 1937 | 1937 | High Hat                              | High Hat                              | Sanforth, Clifford                  | Clifford Sanforth    | tt0028999 |
| 1746569945 | 1960 | 1960 | Sink the Bismarck!                    | Sink the Bismarck!                    | Gilbert, Lewis                      | Lewis Gilbert        | tt0054310 |
| 1746514339 | 1916 | 1916 | The Woman in 47                       | The Woman in 47                       | Irving, George                      | George Irving        | tt0007579 |
| 1746248033 | 1968 | 1968 | Angelique in Black Leather            | Angelique in Black Leather            | Bouchet, Angélique                  | Angélique Bouchet    | tt0210508 |
| 1746503556 | 1921 | 1921 | Desperate Trails                      | Desperate Trails                      | Ford, Jack                          | John Ford            | tt0012102 |
| 1746574626 | 1937 | 1937 | Sing, Cowboy, Sing                    | Sing, Cowboy, Sing                    | Bradbury, R. N.                     | Robert N. Bradbury   | tt0029568 |
| 1746509311 | 1949 | 1949 | Range Justice                         | Range Justice                         | Taylor, Ray                         | Ray Taylor           | tt0165440 |
| 1746585425 | 1939 | 1939 | Trigger Smith                         | Trigger Smith                         | James, Alan                         | Alan James           | tt0032056 |
| 1746512439 | 1916 | 1916 | The Lords of High Decision            | The Lords of High Decision            | Harvey, Jack                        | Jack Harvey          | tt0006941 |
| 1746512757 | 1916 | 1916 | The Return of Draw Egan               | The Return of Draw Egan               | Hart, William S.                    | William S. Hart      | tt0007260 |
| 1746496101 | 1919 | 1919 | Mary Regan                            | Mary Regan                            | Weber, Lois                         | Lois Weber           | tt0010443 |
| 1746235229 | 1978 | 1978 | The Wiz                               | The Wiz                               | Lumet, Sidney                       | Sidney Lumet         | tt0078504 |
| 1746520077 | 1926 | 1926 | Two Fisted Buckaroo                   | Two Fisted Buckaroo                   |                                     |                      | tt0174293 |
| 1746585076 | 1930 | 1930 | The Sap From Syracuse                 | The Sap from Syracuse                 | Sutherland, A. Edward               | A. Edward Sutherland | tt0021334 |
| 1745282895 | 2006 | 2006 | The Santa Clause 3: The Escape Clause | The Santa Clause 3: The Escape Clause | Lembeck, Michael                    | Michael Lembeck      | tt0452681 |
| 1746584650 | 1928 | 1928 | A Certain Young Man                   | A Certain Young Man                   | Henley, Hobart                      | Hobart Henley        | tt0018754 |
| 1746504090 | 1919 | 1919 | The Loves of Letty                    | The Loves of Letty                    | Lloyd, Frank                        | Frank Lloyd          | tt0010403 |
| 1746524464 | 1923 | 1923 | Brass                                 | Brass                                 | Franklin, Sidney A.                 | Sidney Franklin      | tt0013886 |
| 1746435002 | 1991 | 1991 | Defending Your Life                   | Defending Your Life                   | Brooks, Albert                      | Albert Brooks        | tt0101698 |
| 1746504757 | 1921 | 1922 | Beyond the Crossroads                 | Beyond the Crossroads                 | Carleton, Lloyd                     | Lloyd B. Carleton    | tt0012936 |
| 1746503734 | 1918 | 1918 | More Trouble                          | More Trouble                          | Warde, Ernest C.                    | Ernest C. Warde      | tt0009392 |
| 1746454996 | 1996 | 1996 | Tromeo and Juliet                     | Tromeo and Juliet                     | Kaufman, Lloyd                      | Lloyd Kaufman        | tt0114733 |
| 1746410725 | 1990 | 1990 | Postcards from the Edge               | Postcards from the Edge               | Nichols, Mike                       | Mike Nichols         | tt0100395 |
| 1746583014 | 1935 | 1934 | Sequoia                               | Sequoia                               | Franklin, Chester M.; Marin, Edwin; | Chester M. Franklin  | tt0025763 |
| 1746577182 | 1951 | 1951 | Night Riders of Montana               | Night Riders of Montana               | Brannon, Fred C.                    | Fred C. Brannon      | tt0043853 |
| 1746497234 | 1921 | 1921 | Little Italy                          | Little Italy                          | Terwilliger, George                 | George Terwilliger   | tt0012396 |
| 1746423456 | 1940 | 1940 | Covered Wagon Trails                  | Covered Wagon Trails                  | Johnson, Raymond K.                 | Bernard B. Ray       | tt0032363 |
| 1746455330 | 1995 | 1995 | Sudden Death                          | Sudden Death                          | Hyams, Peter                        | Peter Hyams          | tt0114576 |
| 1746234757 | 1968 | 1968 | Sweet November                        | Sweet November                        | Miller, Robert Ellis                | Robert Ellis Miller  | tt0063661 |
| 1746581158 | 1959 | 1959 | The Wonderful Country                 | The Wonderful Country                 | Parrish, Robert                     | Robert Parrish       | tt0053453 |
| 1746562355 | 1957 | 1957 | The Badge of Marshal Brennan          | The Badge of Marshal Brennan          | Gannaway, Albert C.                 | Albert C. Gannaway   | tt0050158 |
| 1746416069 | 1917 | 1918 | The Law of the North                  | The Law of the North                  | George, Burton                      | Irvin Willat         | tt0186292 |
| 1746523316 | 1916 | 1916 | The River of Romance                  | The River of Romance                  | Otto, Henry                         | Henry Otto           | tt0007266 |
| 1746566046 | 1954 | 1954 | Sign of the Pagan                     | Sign of the Pagan                     | Sirk, Douglas                       | Douglas Sirk         | tt0047490 |
| 1746574076 | 1962 | 1962 | Pressure Point                        | Pressure Point                        | Cornfield, Hubert                   | Hubert Cornfield     | tt0056370 |
| 1746474140 | 1944 | 1944 | Up in Mabel's Room                    | Up in Mabel's Room                    | Dwan, Allan                         | Allan Dwan           | tt0037421 |
| 1746453577 | 1943 | 1943 | This Is the Army                      | This Is the Army                      | Curtiz, Michael                     | Michael Curtiz       | tt0036430 |
| 1746501554 | 1916 | 1916 | Pudd'nhead Wilson                     | Pudd'nhead Wilson                     | Reicher, Frank                      | Frank Reicher        | tt0007227 |
| 1746436780 | 1989 | 1989 | The January Man                       | The January Man                       | O'Connor, Pat                       | Pat O'Connor         | tt0097613 |
| 1746484116 | 1919 | 1918 | The Heart of Humanity                 | The Heart of Humanity                 | Holubar, Allen                      | Allen Holubar        | tt0009145 |
| 1746569944 | 1954 | 1954 | Gog                                   | Gog                                   | Strock, Herbert L.                  | Herbert L. Strock    | tt0047033 |
| 1746492200 | 1944 | 1944 | The Singing Sheriff                   | The Singing Sheriff                   | Goodwins, Leslie                    | Leslie Goodwins      | tt0037282 |
| 1746524476 | 1922 | 1922 | The Country Flapper                   | The Country Flapper                   | Jones, F. Richard                   | F. Richard Jones     | tt0013027 |
| 1746572309 | 1932 | 1932 | American Madness                      | American Madness                      | Capra, Frank R.                     | Frank Capra          | tt0022626 |
| 1746508054 | 1924 | 1924 | Pied Piper Malone                     | Pied Piper Malone                     | Green, Alfred E.                    | Alfred E. Green      | tt0015229 |

|            |      |      |                              |                              |                                     |                       |           |
|------------|------|------|------------------------------|------------------------------|-------------------------------------|-----------------------|-----------|
| 1746409444 | 1988 | 1988 | The Serpent and the Rainbow  | The Serpent and the Rainbow  | Craven, Wes                         | Wes Craven            | tt0096071 |
| 1746439130 | 1943 | 1943 | The Mantrap                  | The Mantrap                  | Sherman, George                     | George Sherman        | tt0036139 |
| 1746465218 | 1946 | 1946 | The Falcon's Alibi           | The Falcon's Alibi           | McCarey, Ray                        | Ray McCarey           | tt0038519 |
| 1746520090 | 1948 | 1948 | Wallflower                   | Wallflower                   | Cordova, Frederick de               | Frederick De Cordova  | tt0040948 |
| 1746523566 | 1916 | 1916 | The Havoc                    | The Havoc                    | Berthelet, Arthur                   | Arthur Berthelet      | tt0006760 |
| 1746492483 | 1944 | 1944 | Sheriff of Las Vegas         | Sheriff of Las Vegas         | Selander, Lesley                    | Lesley Selander       | tt0037270 |
| 1745309402 | 2007 | 2007 | The Ten                      | Teeth                        | Wain, David                         | Mitchell Lichtenstein | tt0780622 |
| 1746210046 | 1971 | 1972 | Bury Me an Angel             | Bury Me an Angel             | Peeters, Barbara                    | Barbara Peeters       | tt0066872 |
| 1746520752 | 1950 | 1950 | The Silver Bandit            | The Silver Bandit            | Clifton, Elmer                      | Elmer Clifton         | tt0180165 |
| 1745282607 | 2007 | 2007 | Transformers                 | Transformers                 | Bay, Michael                        | Michael Bay           | tt0418279 |
| 1746248747 | 1976 | 1976 | Mikey and Nicky              | Mikey and Nicky              | May, Elaine                         | Elaine May            | tt0074901 |
| 1746569538 | 1953 | 1953 | Sabre Jet                    | Sabre Jet                    | King, Lewis                         | Louis King            | tt0046262 |
| 1746465276 | 1944 | 1944 | Song of the Range            | Songs of the Range           | Fox, Wallace                        | Jack Scholl           | tt0360788 |
| 1746569643 | 1953 | 1953 | Wings of the Hawk            | Wings of the Hawk            | Boetticher, Budd                    | Budd Boetticher       | tt0046552 |
| 1746508389 | 1925 | 1925 | Soft Shoes                   | Soft Shoes                   | Ingraham, Lloyd                     | Lloyd Ingraham        | tt0016368 |
| 1746561610 | 1932 | 1932 | The Fighting Champ           | The Fighting Champ           | McCarthy, John P.                   | John P. McCarthy      | tt0022884 |
| 1746394767 | 1991 | 1991 | Double Impact                | Double Impact                | Lettich, Sheldon                    | Sheldon Lettich       | tt0101764 |
| 1746560716 | 1932 | 1932 | The Man from Arizona         | The Man from Arizona         | Fraser, Harry                       | Harry L. Fraser       | tt0023182 |
| 1746454625 | 1944 | 1944 | Allergic to Love             | Allergic to Love             | Lilley, Edward; Wilson, Warren      | Edward C. Lilley      | tt0036592 |
| 1746584262 | 1940 | 1940 | Tomboy                       | Tomboy                       | McGowan, Robert                     | Robert F. McGowan     | tt0033172 |
| 1746208589 | 1969 | 1969 | Take the Money and Run       | Take the Money and Run       | Allen, Woody                        | Woody Allen           | tt0065063 |
| 1746485871 | 1921 | 1921 | Orphans of the Storm         | Orphans of the Storm         | Griffith, D. W.                     | D.W. Griffith         | tt0012532 |
| 1746530761 | 1949 | 1949 | Tell It to the Judge         | Tell It to the Judge         | Foster, Norman                      | Norman Foster         | tt0041949 |
| 1746500004 | 1924 | 1924 | In Love With Love            | In Love with Love            | Lee, Rowland V.                     | Rowland V. Lee        | tt0015942 |
| 1746257703 | 1976 | 1976 | Carrie                       | Carrie                       | DePalma, Brian                      | Brian De Palma        | tt0074285 |
| 1746583997 | 1936 | 1935 | Thunderbolt                  | Thunderbolt                  | Paton, Stuart                       | Stuart Paton          | tt0028379 |
| 1746580845 | 1938 | 1938 | State Police                 | State Police                 | Rawlins, John                       | John Rawlins          | tt0030794 |
| 1746574531 | 1936 | 1936 | Girls' Dormitory             | Girls' Dormitory             | Cummings, Irving                    | Irving Cummings       | tt0027677 |
| 1746409755 | 1986 | 1986 | Sweet Liberty                | Sweet Liberty                | Alda, Alan                          | Alan Alda             | tt0092035 |
| 1746574500 | 1934 | 1934 | The Fighting Hero            | Fighting Hero                | Webb, Harry S.                      | Harry S. Webb         | tt0026350 |
| 1746473918 | 1942 | 1942 | Syncopation                  | Syncopation                  | Dieterle, William                   | William Dieterle      | tt0035405 |
| 1769970666 | 1968 | 1968 | All the Way Down             | All the Way Down             | Spencer, Zoltan G.                  | Zoltan G. Spencer     | tt0133357 |
| 1746570351 | 1934 | 1934 | This Man Is Mine             | This Man Is Mine             | Cromwell, John                      | John Cromwell         | tt0025882 |
| 1745309493 | 2007 | 2006 | I'll Believe You             | I'll Believe You             | Sullivan, Paul Francis              | Paul Francis Sullivan | tt0377061 |
| 1746578703 | 1951 | 1951 | Strictly Dishonorable        | Strictly Dishonorable        | Frank, Melvin; Panama, Norman       | Melvin Frank          | tt0044082 |
| 1746419778 | 1983 | 1983 | Curse of the Pink Panther    | Curse of the Pink Panther    | Edwards, Blake                      | Blake Edwards         | tt0085384 |
| 1746584488 | 1930 | 1930 | Queen High                   | Queen High                   | Newmeyer, Fred                      | Fred C. Newmeyer      | tt0021279 |
| 1746523714 | 1916 | 1916 | The Destroyers               | The Destroyers               | Ince, Ralph W.                      | Ralph Ince            | tt0006584 |
| 1746567625 | 1952 | 1952 | Night Stage to Galveston     | Night Stage to Galveston     | Archainbaud, George                 | George Archainbaud    | tt0044966 |
| 1746420747 | 1983 | 1983 | Terms of Endearment          | Terms of Endearment          | Brooks, James L.                    | James L. Brooks       | tt0086425 |
| 1746582113 | 1951 | 1951 | The Big Night                | The Big Night                | Losey, Joseph                       | Joseph Losey          | tt0043340 |
| 1746584841 | 1930 | 1930 | Sweethearts on Parade        | Sweethearts on Parade        | Neilan, Marshall                    | Marshall Neilan       | tt0021442 |
| 1746574120 | 1960 | 1960 | Wake Me When It's Over       | Wake Me When It's Over       | LeRoy, Mervyn                       | Mervyn LeRoy          | tt0054455 |
| 1746473879 | 1942 | 1942 | Westward Ho                  | Westward Ho!                 | English, John                       | John English          | tt0035545 |
| 1746420327 | 1940 | 1940 | 20 Mule Team                 | 20 Mule Team                 | Thorpe, Richard                     | Richard Thorpe        | tt0032178 |
| 1746235445 | 1978 | 1978 | The Brink's Job              | The Brink's Job              | Friedkin, William                   | William Friedkin      | tt0077275 |
| 1746474534 | 1946 | 1946 | The Searching Wind           | The Searching Wind           | Dieterle, William                   | William Dieterle      | tt0038915 |
| 1746584003 | 1940 | 1940 | The Thief of Bagdad          | The Thief of Bagdad          | Berger, Ludwig; Powell, Michael; Wf | Ludwig Berger         | tt0033152 |
| 1746198490 | 1969 | 1969 | The Comic                    | The Comic                    | Reiner, Carl                        | Carl Reiner           | tt0064179 |
| 1745373696 | 2003 | 2002 | Dummy                        | Dummy                        | Pritikin, Greg                      | Greg Pritikin         | tt0246592 |
| 1746234783 | 1975 | 1975 | Three Days of the Condor     | Three Days of the Condor     | Pollack, Sydney                     | Sydney Pollack        | tt0073802 |
| 1746580434 | 1937 | 1937 | Bar-Z Bad Men                | Bar Z Bad Men                | Newfield, Sam                       | Sam Newfield          | tt0028604 |
| 1746509325 | 1924 | 1924 | No More Women                | No More Women                | Ingraham, Lloyd                     | Lloyd Ingraham        | tt0015178 |
| 1746520082 | 1927 | 1927 | The Princess on Broadway     | The Princess on Broadway     | Fitzgerald, Dallas M.               | Dallas M. Fitzgerald  | tt0018286 |
| 1746562288 | 1956 | 1956 | Please Murder Me             | Please Murder Me!            | Godfrey, Peter                      | Peter Godfrey         | tt0049621 |
| 1746573880 | 1958 | 1958 | The Hideous Sun Demon        | The Hideous Sun Demon        | Clarke, Robert                      | Robert Clarke         | tt0052888 |
| 1745302306 | 2005 | 2005 | My Big Fat Independent Movie | My Big Fat Independent Movie | Zlotorynski, Phil                   | Philip Zlotorynski    | tt0385890 |

|                   |             |             |                           |                           |                                       |                     |                  |
|-------------------|-------------|-------------|---------------------------|---------------------------|---------------------------------------|---------------------|------------------|
| 1746474799        | 1946        | 1946        | The March of Crime        | The March of Crime        |                                       |                     | tt5370178        |
| 1769975771        | 1918        | 1918        | Love and Lunch            | Love and Lunch            | Seiter, William A.                    | William A. Seiter   | tt1312991        |
| 1746500143        | 1950        | 1950        | The Jackie Robinson Story | The Jackie Robinson Story | Green, Alfred E.                      | Alfred E. Green     | tt0042609        |
| 1746576937        | 1963        | 1963        | Sound of Laughter         | The Sound of Laughter     | O'Shaughnessy, John                   | John O'Shaughnessy  | tt0221565        |
| 1746520954        | 1950        | 1950        | Farewell to Yesterday     | Farewell to Yesterday     |                                       |                     | tt0338990        |
| 1746574807        | 1933        | 1933        | King for a Night          | King for a Night          | Neumann, Kurt                         | Kurt Neumann        | tt0024217        |
| 1746486868        | 1918        | 1918        | Love's Pay Day            | Love's Pay Day            | Hopper, E. Mason                      | E. Mason Hopper     | tt0186323        |
| 1746571099        | 1952        | 1952        | The Iron Mistress         | The Iron Mistress         | Douglas, Gordon                       | Gordon Douglas      | tt0044753        |
| 1746583882        | 1929        | 1928        | The River                 | The River                 | Borzage, Frank                        | Frank Borzage       | tt0020335        |
| 1746563663        | 1952        | 1951        | Golden Girl               | Golden Girl               | Bacon, Lloyd                          | Lloyd Bacon         | tt0043592        |
| 1746487589        | 1919        | 1919        | Calibre 38                | Calibre 38                | Lewis, Edgar                          | Edgar Lewis         | tt0188469        |
| 1745359054        | 2003        | 2002        | Ben & Arthur              | Ben & Arthur              | Mraovich, Sam                         | Sam Mraovich        | tt0364986        |
| 1746571067        | 1934        | 1934        | Successful Failure        | A Successful Failure      | Lubin, Arthur                         | Arthur Lubin        | tt0025845        |
| 1746580243        | 1938        | 1938        | Vacation from Love        | Vacation from Love        | Fitzmaurice, Geo.                     | George Fitzmaurice  | tt0030922        |
| 1745372565        | 2010        | 2009        | Tales from the Script     | Tales from the Script     | Hanson, Peter                         | Peter Hanson        | tt1045642        |
| 1746272134        | 1966        | 1966        | The Love Merchant         | The Love Merchant         | Sarno, Joe                            | Joseph W. Sarno     | tt0059405        |
| 1746453628        | 1943        | 1943        | One Dangerous Night       | One Dangerous Night       | Gordon, Michael                       | Michael Gordon      | tt0036237        |
| 1746511807        | 1922        | 1922        | A Dangerous Game          | A Dangerous Game          | Baggot, King                          | King Baggot         | tt0013047        |
| <b>1745271929</b> | <b>2000</b> | <b>2000</b> | <b>The Yards</b>          | <b>The Yards</b>          | <b>Gray, James</b>                    | <b>James Gray</b>   | <b>tt0138946</b> |
| 1746562194        | 1953        | 1953        | The Juggler               | The Juggler               | Dmytryk, Edward                       | Edward Dmytryk      | tt0045941        |
| 1746580649        | 1938        | 1938        | Invisible Enemy           | Invisible Enemy           | Auer, John H.                         | John H. Auer        | tt0030276        |
| 1746420039        | 1994        | 1994        | Star Trek Generations     | Star Trek: Generations    | Carson, David                         | David Carson        | tt0111280        |
| 1746564933        | 1952        | 1952        | Lady Possessed            | Lady Possessed            | Spier, William; Kellino, Roy          | Roy Kellino         | tt0044817        |
| 1745340088        | 2002        | 2002        | Spellbound                | Spellbound                | Blitz, Jeff                           | Jeffrey Blitz       | tt0334405        |
| 1746581921        | 1930        | 1930        | Ladies Love Brutes        | Ladies Love Brutes        | Lee, Rowland V.                       | Rowland V. Lee      | tt0021037        |
| 1746583470        | 1950        | 1950        | When You're Smiling       | When You're Smiling       | Santley, Joseph                       | Joseph Santley      | tt0043130        |
| 1745373954        | 2010        | 2010        | Grown Ups                 | Grown Ups                 | Dugan, Dennis                         | Dennis Dugan        | tt1375670        |
| 1746580410        | 1937        | 1937        | You Can't Buy Luck        | You Can't Buy Luck        | Landers, Lew                          | Lew Landers         | tt0029805        |
| 1746561965        | 1956        | 1956        | The White Squaw           | The White Squaw           | Nazarro, Ray                          | Ray Nazarro         | tt0049950        |
| 1746524842        | 1923        | 1923        | Does It Pay?              | Does It Pay?              | Horan, Charles                        | Charles Horan       | tt0013993        |
| 1746217368        | 1968        | 1968        | Journey to Shiloh         | Journey to Shiloh         | Hale, William                         | William Hale        | tt0063161        |
| 1745282536        | 2007        | 2007        | Live Free or Die Hard     | Live Free or Die Hard     | Wiseman, Len                          | Len Wiseman         | tt0337978        |
| 1746454382        | 1941        | 1941        | Saddlemates               | Saddlemates               | Orlebeck, Les                         | Lester Orlebeck     | tt0034142        |
| 1746509538        | 1926        | 1927        | Through Thick and Thin    | Through Thick and Thin    | Eason, Breezy Reeves; Nelson, Jack    | Jack Nelson         | tt0018485        |
| 1746493706        | 1914        | 1914        | Hearts Adrift             | Hearts Adrift             | Porter, Edwin S.                      | Edwin S. Porter     | tt0004057        |
| 1746474951        | 1948        | 1948        | The Man from Colorado     | The Man from Colorado     | Levin, Henry; Vidor, Charles          | Henry Levin         | tt0041625        |
| 1746508157        | 1924        | 1924        | Men, Women and Money      | Men, Women and Money      |                                       |                     | tt0330623        |
| 1745293823        | 2005        | 2005        | Cursed                    | Cursed                    | Craven, Wes                           | Wes Craven          | tt0257516        |
| 1746578740        | 1951        | 1951        | Here Comes the Groom      | Here Comes the Groom      | Capra, Frank                          | Frank Capra         | tt0043633        |
| 1746580206        | 1935        | 1935        | O'Shaughnessy's Boy       | O'Shaughnessy's Boy       | Boleslawski, Richard                  | Richard Boleslawski | tt0026799        |
| 1746436681        | 1941        | 1941        | The Wolf Man              | The Wolf Man              | Waggner, George                       | George Waggner      | tt0034398        |
| 1746248264        | 1967        | 1967        | A Time for Burning        | A Time for Burning        | Jersey, William C.; Connell, Barbara  | Barbara Connell     | tt0062372        |
| 1746508737        | 1950        | 1950        | The Damned Don't Cry      | The Damned Don't Cry      | Sherman, Vincent                      | Vincent Sherman     | tt0042376        |
| 1746453553        | 1942        | 1942        | Code of the Outlaw        | Code of the Outlaw        | English, John                         | John English        | tt0034604        |
| 1746454248        | 1995        | 1994        | S. F. W.                  | S.F.W.                    | Levy, Jefery                          | Jefery Levy         | tt0111048        |
| 1746508387        | 1950        | 1949        | Dancing in the Dark       | Dancing in the Dark       | Reis, Irving                          | Irving Reis         | tt0041277        |
| 1746571469        | 1931        | 1931        | Mother's Millions         | Mother's Millions         | Flood, James                          | James Flood         | tt0022370        |
| 1746567738        | 1952        | 1952        | Flaming Feather           | Flaming Feather           | Enright, Ray                          | Ray Enright         | tt0043544        |
| 1746249405        | 1976        | 1975        | The California Reich      | The California Reich      | Parke, Walter F.; Critchlow, Keith F. | Keith Critchlow     | tt0072757        |
| 1746582878        | 1935        | 1935        | The Live Wire             | The Live Wire             | Webb, Harry S.                        | Harry S. Webb       | tt0130085        |
| 1746532745        | 1915        | 1915        | Blue Grass                | Blue Grass                | Seay, Charles                         | Charles M. Seay     | tt0004983        |
| 1746512154        | 1915        | 1915        | Sunday                    | Sunday                    | Lederer, George W.                    | George W. Lederer   | tt0006118        |
| 1746560780        | 1932        | 1932        | Hell's Headquarters       | Hell's Headquarters       | Stone, Andrew L.                      | Andrew L. Stone     | tt0022989        |
| 1746584175        | 1934        | 1934        | That's Gratitude          | That's Gratitude          | Craven, Frank                         | Frank Craven        | tt0025869        |
| 1745309125        | 2006        | 2006        | For Your Consideration    | For Your Consideration    | Guest, Christopher                    | Christopher Guest   | tt0470765        |
| 1746583267        | 1929        | 1929        | In Old California         | In Old California         | King, Burton                          | Burton L. King      | tt0020019        |
| 1746465408        | 1946        | 1946        | Strange Journey           | Strange Journey           | Tinling, James                        | James Tinling       | tt0038987        |

|            |      |      |                                       |                                       |                      |                      |            |
|------------|------|------|---------------------------------------|---------------------------------------|----------------------|----------------------|------------|
| 1746234004 | 1967 | 1967 | Hostile Guns                          | Hostile Guns                          | Springsteen, R. G.   | R.G. Springsteen     | tt0061783  |
| 1745309438 | 2006 | 2006 | My Super Ex-Girlfriend                | My Super Ex Girlfriend                | Reitman, Ivan        | Ivan Reitman         | tt0465624  |
| 1746566055 | 1953 | 1953 | Niagara                               | Niagara                               | Hathaway, Henry      | Henry Hathaway       | tt0046126  |
| 1746199203 | 1969 | 1969 | Blood of Dracula's Castle             | Blood of Dracula's Castle             | Adamson, Al          | Al Adamson           | tt0061412  |
| 1745293807 | 2006 | 2007 | What Love Is                          | What Love Is                          | Callahan, Mars       | Mars Callahan        | tt0439876  |
| 1746573675 | 1932 | 1932 | Drifting Souls                        | Drifting Souls                        | King, Louis          | Louis King           | tt0022841  |
| 1746577510 | 1934 | 1934 | Strictly Dynamite                     | Strictly Dynamite                     | Nugent, Elliott      | Elliott Nugent       | tt0025838  |
| 1746581161 | 1951 | 1951 | The People Against O'Hara             | The People Against O'Hara             | Sturges, John        | John Sturges         | tt0043914  |
| 1746574077 | 1959 | 1959 | The Little Savage                     | The Little Savage                     | Haskin, Byron        | Byron Haskin         | tt0053012  |
| 1745341204 | 2002 | 2002 | Brown Sugar                           | Brown Sugar                           | Famuyiwa, Rick       | Rick Famuyiwa        | tt0297037  |
| 1746583700 | 1929 | 1929 | The Pagan                             | The Pagan                             | Van Dyke, W. S.      | W.S. Van Dyke        | tt0020253  |
| 1746585339 | 1929 | 1929 | Making the Grade                      | Making the Grade                      | Green, Alfred E.     | Alfred E. Green      | tt0020132  |
| 1746514948 | 1923 | 1923 | Single Handed                         | Single Handed                         | Sedgwick, Edward     | Edward Sedgwick      | tt0014474  |
| 1746561878 | 1954 | 1954 | Drums Across the River                | Drums Across the River                | Juran, Nathan        | Nathan Juran         | tt0046937  |
| 1746465210 | 1946 | 1946 | The Story of Kenneth W. Randall, M.D. | The Story of Kenneth W. Randall, M.D. | Kerbawy, Haford      | Haford Kerbawy       | tt1013720  |
| 1746570417 | 1934 | 1934 | Sleepers East                         | Sleepers East                         | MacKenna, Kenneth    | Kenneth MacKenna     | tt0025801  |
| 1746582798 | 1938 | 1938 | The Daredevil Drivers                 | The Daredevil Drivers                 | Eason, B. Reeves     | B. Reeves Eason      | tt0030041  |
| 1746454035 | 1943 | 1943 | The Saint Meets the Tiger             | The Saint Meets the Tiger             | Stein, Paul          | Paul L. Stein        | tt0036324  |
| 1746454492 | 1945 | 1945 | Shady Lady                            | Shady Lady                            | Waggner, George      | George Waggner       | tt0038079  |
| 1746574313 | 1961 | 1961 | Blast of Silence                      | Blast of Silence                      | Baron, Allen         | Allen Baron          | tt0054687  |
| 1746577212 | 1960 | 1960 | Twelve Hours to Kill                  | Twelve Hours to Kill                  | Cahn, Edward L.      | Edward L. Cahn       | tt0053557  |
| 1746520157 | 1925 | 1925 | Three Wise Goofs                      | Three Wise Goofs                      | Davis, Jimmy         | James D. Davis       | tt0348203  |
| 1746525120 | 1919 | 1919 | Sadie Love                            | Sadie Love                            | Robertson, John S.   | John S. Robertson    | tt0010652  |
| 1746393014 | 1981 | 1981 | Student Bodies                        | Student Bodies                        | Rose, Mickey         | Mickey Rose          | tt0083133  |
| 1746211078 | 1972 | 1972 | Pete 'n' Tillie                       | Pete 'n' Tillie                       | Ritt, Martin         | Martin Ritt          | tt0069080  |
| 1745374340 | 2003 | 2002 | Dark Blue                             | Dark Blue                             | Shelton, Ron         | Ron Shelton          | tt0279331  |
| 1746514147 | 1923 | 1923 | Daughters of the Rich                 | Daughters of the Rich                 | Gasnier, Louis       | Louis J. Gasnier     | tt0013976  |
| 1746514723 | 1916 | 1916 | The Love Hermit                       | The Love Hermit                       | Prescott, Jack       | Jack Prescott        | tt00163073 |
| 1746571014 | 1952 | 1952 | Japanese War Bride                    | Japanese War Bride                    | Vidor, King          | King Vidor           | tt0044764  |
| 1746571127 | 1933 | 1933 | The Telegraph Trail                   | The Telegraph Trail                   | Wright, Tenny        | Tenny Wright         | tt0024647  |
| 1746520904 | 1950 | 1950 | High Lonesome                         | High Lonesome                         | LeMay, Alan          | Alan LeMay           | tt0042552  |
| 1746574845 | 1934 | 1934 | Kid Millions                          | Kid Millions                          | Del Ruth, Roy        | Roy Del Ruth         | tt0025347  |
| 1746509289 | 1949 | 1949 | The Fountainhead                      | The Fountainhead                      | Vidor, King          | King Vidor           | tt0041386  |
| 1746465347 | 1942 | 1942 | A Gentleman at Heart                  | A Gentleman at Heart                  | McCarey, Ray         | Ray McCarey          | tt0034779  |
| 1746509178 | 1924 | 1924 | Trouping With Ellen                   | Trouping with Ellen                   | Hunter, T. Hayes     | T. Hayes Hunter      | tt0015436  |
| 1746523977 | 1923 | 1923 | Fashion Row                           | Fashion Row                           | Leonard, Robert Z.   | Robert Z. Leonard    | tt0014037  |
| 1746421354 | 1993 | 1993 | The Three Musketeers                  | The Three Musketeers                  | Herek, Stephen       | Stephen Herek        | tt0108333  |
| 1746503521 | 1918 | 1918 | He Comes Up Smiling                   | He Comes Up Smiling                   | Dwan, Allan          | Allan Dwan           | tt0009142  |
| 1746582731 | 1939 | 1940 | Cafe Hostess                          | Cafe Hostess                          | Salkow, Sidney       | Sidney Salkow        | tt0032296  |
| 1746581480 | 1910 | 1910 | Fruit and Flowers                     | Fruit and Flowers                     |                      |                      | tt0449265  |
| 1746574593 | 1935 | 1935 | Goin' to Town                         | Goin' to Town                         | Hall, Alexander      | Alexander Hall       | tt0026419  |
| 1745359661 | 2002 | 2002 | Abandon                               | Abandon                               | Gaghan, Stephen      | Stephen Gaghan       | tt0267248  |
| 1746568165 | 1952 | 1952 | High Noon                             | High Noon                             | Zinnemann, Fred      | Fred Zinnemann       | tt0044706  |
| 1746272696 | 1980 | 1980 | Motel Hell                            | Motel Hell                            | Connor, Kevin        | Kevin Connor         | tt0081184  |
| 1746453796 | 1943 | 1943 | Johnny Come Lately                    | Johnny Come Lately                    | Howard, William K.   | William K. Howard    | tt0036057  |
| 1746504080 | 1921 | 1921 | Devil Dog Dawson                      | Devil Dog Dawson                      |                      | Karl R. Coolidge     | tt0012104  |
| 1746553288 | 1963 | 1963 | A Child Is Waiting                    | A Child Is Waiting                    | Cassavetes, John     | John Cassavetes      | tt0056930  |
| 1746251504 | 1977 | 1977 | Slap Shot                             | Slap Shot                             | Hill, George Roy     | George Roy Hill      | tt0076723  |
| 1745271843 | 2000 | 2000 | 102 Dalmatians                        | 102 Dalmatians                        | Lima, Kevin          | Kevin Lima           | tt0211181  |
| 1746584079 | 1935 | 1935 | Under the Pampas Moon                 | Under the Pampas Moon                 | Tinling, James       | James Tinling        | tt0027156  |
| 1746584500 | 1929 | 1929 | The Idle Rich                         | The Idle Rich                         | de Mille, William C. | William C. de Mille  | tt0020014  |
| 1746533209 | 1915 | 1915 | Armstrong's Wife                      | Armstrong's Wife                      | Melford, George H.   | George Melford       | tt0004909  |
| 1746500503 | 1927 | 1927 | The Snarl of Hate                     | The Snarl of Hate                     | Smith, Noel Mason    | Noel M. Smith        | tt0018420  |
| 1746512073 | 1923 | 1923 | The Broken Wing                       | The Broken Wing                       | Forman, Tom          | Tom Forman           | tt0013898  |
| 1746524710 | 1913 | 1913 | Ten Nights in a Barroom               | Ten Nights in a Barroom               | Beggs, Lee           | Lee Beggs            | tt0003438  |
| 1746578699 | 1958 | 1958 | Tarzan's Fight for Life               | Tarzan's Fight for Life               | Humberstone, Bruce   | H. Bruce Humberstone | tt0052275  |
| 1746492414 | 1944 | 1944 | The Utah Kid                          | The Utah Kid                          | Keays, Vernon        | Vernon Keays         | tt0037422  |

|            |      |      |                                        |                                        |                                 |                      |           |
|------------|------|------|----------------------------------------|----------------------------------------|---------------------------------|----------------------|-----------|
| 1746210170 | 1970 | 1970 | The Magic Garden of Stanley Sweetheart | The Magic Garden of Stanley Sweetheart | Horn, Leonard                   | Leonard Horn         | tt0066036 |
| 1746571083 | 1935 | 1935 | The Pace That Kills                    | The Pace That Kills                    | O'Connor, Wm. A.                | William A. O'Connor  | tt0028074 |
| 1746578057 | 1935 | 1935 | Strangers All                          | Strangers All                          | Vidor, Charles                  | Charles Vidor        | tt0027052 |
| 1746583340 | 1930 | 1930 | Let Us Be Gay                          | Let Us Be Gay                          | Leonard, Robert Z.              | Robert Z. Leonard    | tt0021060 |
| 1746475942 | 1947 | 1947 | My Brother Talks to Horses             | My Brother Talks to Horses             | Zinnemann, Fred                 | Fred Zinnemann       | tt0038761 |
| 1746409371 | 1984 | 1984 | A Soldier's Story                      | A Soldier's Story                      | Jewison, Norman                 | Norman Jewison       | tt0088146 |
| 1746584139 | 1940 | 1940 | Yukon Flight                           | Yukon Flight                           | Staub, Ralph                    | Ralph Staub          | tt0033292 |
| 1746515603 | 1919 | 1919 | The Pointing Finger                    | The Pointing Finger                    | Kull, Edward; Morrissey, Edward | Edward A. Kull       | tt0010575 |
| 1746564206 | 1952 | 1952 | Singin' in the Rain                    | Singin' in the Rain                    | Kelly, Gene; Donen, Stanley     | Stanley Donen        | tt0045152 |
| 1746555202 | 1955 | 1955 | Shock-O-Rama                           | Shock O Rama                           | Ibenthinkin, Ruben              | Ruben I. Binthinkin  | tt0160866 |
| 1746580498 | 1939 | 1939 | Back Door to Heaven                    | Back Door to Heaven                    | Howard, William K.              | William K. Howard    | tt0031068 |
| 1746455747 | 1999 | 1999 | The Omega Code                         | The Omega Code                         | Marcarelli, Rob                 | Robert Marcarelli    | tt0203408 |
| 1746582163 | 1951 | 1951 | Love Nest                              | Love Nest                              | Newman, Joseph                  | Joseph M. Newman     | tt0043759 |
| 1746409115 | 1988 | 1988 | For Keeps?                             | For Keeps?                             | Avildsen, John G.               | John G. Avildsen     | tt0095169 |
| 1746410400 | 1992 | 1992 | Death Becomes Her                      | Death Becomes Her                      | Zemeckis, Robert                | Robert Zemeckis      | tt0104070 |
| 1746578055 | 1937 | 1937 | Lost Horizon                           | Lost Horizon                           | Capra, Frank                    | Frank Capra          | tt0029162 |
| 1746583938 | 1930 | 1930 | Back Pay                               | Back Pay                               |                                 | William A. Seiter    | tt0020661 |
| 1746434926 | 1997 | 1996 | Bandwagon                              | Bandwagon                              | Schultz, John                   | John Schultz         | tt0112454 |
| 1746516024 | 1920 | 1920 | Everything But the Truth               | Everything But the Truth               | Lyons, Eddie; Moran, Lee        | Eddie Lyons          | tt0011161 |
| 1746210911 | 1970 | 1970 | There Was a Crooked Man ...            | There Was a Crooked Man...             | Mankiewicz, Joseph L.           | Joseph L. Mankiewicz | tt0066448 |
| 1746219651 | 1974 | 1974 | Thieves Like Us                        | Thieves Like Us                        | Altman, Robert                  | Robert Altman        | tt0072274 |
| 1746574351 | 1951 | 1951 | Gasoline Alley                         | Gasoline Alley                         | Bernds, Edward                  | Edward Bernds        | tt0125761 |
| 1746581555 | 1910 | 1910 | His Yankee Girl                        | His Yankee Girl                        |                                 |                      | tt0413503 |
| 1746555528 | 1957 | 1957 | 3:10 to Yuma                           | 3:10 to Yuma                           | Daves, Delmer                   | Delmer Daves         | tt0050086 |
| 1746580990 | 1958 | 1958 | Marjorie Morningstar                   | Marjorie Morningstar                   | Rapper, Irving                  | Irving Rapper        | tt0051911 |
| 1746583191 | 1930 | 1930 | The Call of the Circus                 | Call of the Circus                     | O'Connor, Frank                 | Frank O'Connor       | tt0020722 |
| 1746250385 | 1976 | 1976 | Tunnelvision                           | Tunnel Vision                          | Swirnoff, Brad; Israel, Neil    | Neal Israel          | tt0075357 |
| 1746584388 | 1937 | 1937 | Back in Circulation                    | Back in Circulation                    | Enright, Ray                    | Ray Enright          | tt0028599 |
| 1746584235 | 1939 | 1939 | Two Bright Boys                        | Two Bright Boys                        | Santley, Joseph                 | Joseph Santley       | tt0032066 |
| 1745309533 | 2005 | 2005 | Bigger Than the Sky                    | Bigger Than the Sky                    | Corley, Al                      | Al Corley            | tt0363504 |
| 1746271435 | 1979 | 1979 | Hardcore                               | Hardcore                               | Schrader, Paul                  | Paul Schrader        | tt0079271 |
| 1746566289 | 1957 | 1957 | Teenage Doll                           | Teenage Doll                           | Corman, Roger                   | Roger Corman         | tt0051062 |
| 1746218180 | 1968 | 1968 | The Lion in Winter                     | The Lion in Winter                     | Harvey, Anthony                 | Anthony Harvey       | tt0063227 |
| 1746585489 | 1940 | 1940 | Tom Brown's School Days                | Tom Brown's School Days                | Stevenson, Robert               | Robert Stevenson     | tt0033169 |
| 1746566922 | 1933 | 1933 | Voltaire                               | Voltaire                               | Adolfi, John G.                 | John G. Adolfi       | tt0024742 |
| 1746514565 | 1916 | 1916 | The Mark of Cain                       | The Mark of Cain                       | De Grasse, Joseph               | Joseph De Grasse     | tt0007039 |
| 1746582283 | 1930 | 1930 | Lawful Larceny                         | Lawful Larceny                         | Sherman, Lowell                 | Lowell Sherman       | tt0021056 |
| 1746567014 | 1933 | 1933 | Broadway Bad                           | Broadway Bad                           | Lanfield, Sidney                | Sidney Lanfield      | tt0023846 |
| 1746496089 | 1919 | 1919 | The Wilderness Trail                   | The Wilderness Trail                   | Le Saint, Edward J.             | Edward LeSaint       | tt0010895 |
| 1746577661 | 1933 | 1933 | White Woman                            | White Woman                            | Walker, Stuart                  | Stuart Walker        | tt0024771 |
| 1746560697 | 1932 | 1932 | The Mummy                              | The Mummy                              | Freund, Karl                    | Karl Freund          | tt0023245 |
| 1746555883 | 1954 | 1953 | Paratrooper                            | Paratrooper                            | Young, Terence                  | Terence Young        | tt0046161 |
| 1746437402 | 1940 | 1940 | Covered Wagon Days                     | Covered Wagon Days                     | Sherman, George                 | George Sherman       | tt0032362 |
| 1746513134 | 1927 | 1927 | The Coward                             | The Coward                             | Raboch, Alfred                  | Alfred Raboch        | tt0017777 |
| 1746582153 | 1929 | 1929 | Painted Faces                          | Painted Faces                          | Rogell, Albert                  | Albert S. Rogell     | tt0020255 |
| 1746394193 | 1983 | 1983 | Smokey and the Bandit--Part 3          | Smokey and the Bandit Part 3           | Lowry, Dick                     | Dick Lowry           | tt0086325 |
| 1746500132 | 1946 | 1946 | Little Miss Big                        | Little Miss Big                        | Kenton, Erle C.                 | Erle C. Kenton       | tt0038696 |
| 1746573839 | 1961 | 1961 | The Hustler                            | The Hustler                            | Rossen, Robert                  | Robert Rossen        | tt0054997 |
| 1745293386 | 2005 | 2005 | Hostage                                | Hostage                                | Siri, Florent                   | Florent              | tt0340163 |
| 1746502271 | 1914 | 1914 | Beating Back                           | Beating Back                           | Fleming, Caryl S.               | Caryl S. Fleming     | tt0003668 |
| 1746473654 | 1946 | 1945 | Saratoga Trunk                         | Saratoga Trunk                         | Wood, Sam                       | Sam Wood             | tt0038053 |
| 1746581018 | 1962 | 1962 | Panic in Year Zero!                    | Panic in Year Zero!                    | Milland, Ray                    | Ray Milland          | tt0056331 |
| 1746577084 | 1951 | 1951 | Across the Wide Missouri               | Across the Wide Missouri               | Wellman, William                | William A. Wellman   | tt0043262 |
| 1746454635 | 1944 | 1944 | The Lady and the Monster               | The Lady and the Monster               | Sherman, George                 | George Sherman       | tt0036999 |
| 1746579068 | 1963 | 1963 | The Gun Hawk                           | The Gun Hawk                           | Ludwig, Edward                  | Edward Ludwig        | tt0057121 |
| 1746561720 | 1932 | 1932 | The Silver Lining                      | The Silver Lining                      | Crosland, Alan                  | Alan Crosland        | tt0023474 |
| 1745373975 | 2002 | 2001 | A Beautiful Mind                       | A Beautiful Mind                       | Howard, Ron                     | Ron Howard           | tt0268978 |

|            |      |      |                                              |                                              |                                |                                     |           |
|------------|------|------|----------------------------------------------|----------------------------------------------|--------------------------------|-------------------------------------|-----------|
| 1746516293 | 1921 | 1921 | White Oak                                    | White Oak                                    | Hillyer, Lambert               | Lambert Hillyer                     | tt0012843 |
| 1746569736 | 1954 | 1954 | Désirée                                      | Désirée                                      | Koster, Henry                  | Henry Koster                        | tt0046903 |
| 1746580913 | 1935 | 1935 | Werewolf of London                           | Werewolf of London                           | Walker, Stuart                 | Stuart Walker                       | tt0027194 |
| 1746410710 | 1989 | 1989 | Penn & Teller Get Killed                     | Penn & Teller Get Killed                     | Penn, Arthur                   | Arthur Penn                         | tt0098073 |
| 1746185603 | 1965 | 1965 | The Prince and the Nature Girl               | The Prince and the Nature Girl               | Wishman, Doris                 | Doris Wishman                       | tt0187420 |
| 1746487924 | 1919 | 1919 | Bullin' the Bullsheviki                      | Bullin' the Bullsheviki                      | Donovan, Frank P.              | Frank P. Donovan                    | tt0187766 |
| 1746500540 | 1925 | 1925 | A Woman's Faith                              | A Woman's Faith                              | Laemmle, Edward                | Edward Laemmle                      | tt0016549 |
| 1745294017 | 2005 | 2005 | Underclassman                                | Underclassman                                | Siega, Marcos                  | Marcos Siega                        | tt0373416 |
| 1746566293 | 1958 | 1957 | Paths of Glory                               | Paths of Glory                               | Kubrick, Stanley               | Stanley Kubrick                     | tt0050825 |
| 1746569884 | 1960 | 1959 | Vice Raid                                    | Vice Raid                                    | Cahn, Edward L.                | Edward L. Cahn                      | tt0053418 |
| 1746520901 | 1950 | 1950 | Forbidden Jungle                             | Forbidden Jungle                             | Tansey, Robert                 | Robert Emmett Tansey                | tt0042473 |
| 1746577964 | 1939 | 1939 | Bachelor Mother                              | Bachelor Mother                              | Kanin, Garson                  | Garson Kanin                        | tt0031067 |
| 1746209002 | 1966 | 1966 | Nashville Rebel                              | Nashville Rebel                              | Sheridan, Jay                  | Jay Sheridan                        | tt0060739 |
| 1746274113 | 1980 | 1980 | Gorp                                         | Gorp                                         | Ruben, Joseph                  | Joseph Ruben                        | tt0080809 |
| 1746583084 | 1938 | 1938 | Prairie Justice                              | Prairie Justice                              | Waggner, George                | George Waggner                      | tt0030619 |
| 1746513705 | 1915 | 1915 | Still Waters                                 | Still Waters                                 | Dawley, J. Searle              | J. Searle Dawley                    | tt0006096 |
| 1746454053 | 1942 | 1942 | Ship Ahoy                                    | Ship Ahoy                                    | Buzzell, Edward                | Edward Buzzell                      | tt0035320 |
| 1746577592 | 1934 | 1934 | Tomorrow's Children                          | Tomorrow's Children                          | Wilbur, Crane                  | Crane Wilbur                        | tt0220107 |
| 1746508485 | 1924 | 1924 | The Fifth Horseman                           | The Fifth Horseman                           |                                | E.M. McMahon                        | tt0014887 |
| 1746581067 | 1910 | 1910 | The Girl on Triple X                         | The Girl on Triple X                         |                                | Gilbert M. 'Broncho Billy' Anderson | tt0001233 |
| 1746408440 | 1987 | 1987 | The Outing                                   | The Outing                                   | Daley, Tom                     | Tom Daley                           | tt0091707 |
| 1746508115 | 1925 | 1925 | Billy the Kid                                | Billy the Kid                                | McGowan, J. P.                 | J.P. McGowan                        | tt2295738 |
| 1746520696 | 1925 | 1925 | Sand Blind                                   | Sand Blind                                   | Jaccard, Jacques               | Jacques Jaccard                     | tt0161957 |
| 1746573734 | 1959 | 1959 | The Immoral Mr. Teas                         | The Immoral Mr. Teas                         | Meyer, Russ                    | Russ Meyer                          | tt0052920 |
| 1746438185 | 1941 | 1941 | Four Mothers                                 | Four Mothers                                 | Keighley, William              | William Keighley                    | tt0033628 |
| 1746503820 | 1921 | 1921 | Gilded Lies                                  | Gilded Lies                                  | Earle, William P. S.           | William P.S. Earle                  | tt0133798 |
| 1746570429 | 1934 | 1934 | Fifteen Wives                                | Fifteen Wives                                | Strayer, Frank R.              | Frank R. Strayer                    | tt0025109 |
| 1746423757 | 2000 | 2000 | Charlie's Angels                             | Charlie's Angels                             | McG                            | McG                                 | tt0160127 |
| 1746577422 | 1959 | 1959 | Invisible Invaders                           | Invisible Invaders                           | Cahn, Edward L.                | Edward L. Cahn                      | tt0052929 |
| 1745342691 | 2002 | 2001 | The Man from Elysian Fields                  | The Man from Elysian Fields                  | Hickenlooper, George           | George Hickenlooper                 | tt0265307 |
| 1746574090 | 1959 | 1959 | The Jayhawkers!                              | The Jayhawkers!                              | Frank, Melvin                  | Melvin Frank                        | tt0052941 |
| 1746555114 | 1955 | 1955 | Six Bridges to Cross                         | Six Bridges to Cross                         | Pevney, Joseph                 | Joseph Pevney                       | tt0048628 |
| 1746577029 | 1961 | 1961 | Town Without Pity                            | Town Without Pity                            | Reinhardt, Gottfried           | Gottfried Reinhardt                 | tt0055539 |
| 1746498303 | 1920 | 1920 | Bitter Fruit                                 | Bitter Fruit                                 | Bradley, Will                  | Will H. Bradley                     | tt0130506 |
| 1746520548 | 1927 | 1927 | The Tigress                                  | The Tigress                                  | Seitz, George B.               | George B. Seitz                     | tt0018486 |
| 1769976185 | 1920 | 1920 | A Home Spun Hero                             | A Home Spun Hero                             | Beaudine [Sr.], William        | William Beaudine                    | tt0248872 |
| 1745340785 | 2003 | 2003 | Holes                                        | Holes                                        | Davis, Andrew                  | Andrew Davis                        | tt0311289 |
| 1746394681 | 1988 | 1988 | Poltergeist III                              | Poltergeist III                              | Sherman, Gary                  | Gary Sherman                        | tt0095889 |
| 1746273483 | 1980 | 1980 | The Elephant Man                             | The Elephant Man                             | Lynch, David                   | David Lynch                         | tt0080678 |
| 1745341773 | 2002 | 2002 | The First \$20 Million Is Always the Hardest | The First \$20 Million Is Always the Hardest | Jackson, Mick                  | Mick Jackson                        | tt0280674 |
| 1746514221 | 1915 | 1915 | The Call of the Dance                        | The Call of the Dance                        | Sargent, George L.             | George L. Sargent                   | tt0005048 |
| 1746512582 | 1916 | 1916 | The Price of Silence                         | The Price of Silence                         | De Grasse, Joseph              | Joseph De Grasse                    | tt0007213 |
| 1746495690 | 1917 | 1917 | Treason                                      | Treason                                      | Holubar, Allen                 | Allen Holubar                       | tt0008694 |
| 1746523555 | 1916 | 1916 | The Phantom Buccaneer                        | The Phantom Buccaneer                        | Haydon, J. Charles             | J. Charles Haydon                   | tt0007178 |
| 1746514828 | 1928 | 1928 | Law of Fear                                  | Law of Fear                                  | Storm, Jerome                  | Jerome Storm                        | tt0126997 |
| 1746502459 | 1917 | 1917 | The Hand That Rocks the Cradle               | The Hand That Rocks the Cradle               | Weber, Lois; Smalley, Phillips | Phillips Smalley                    | tt0008041 |
| 1746532828 | 1914 | 1914 | The Gamblers                                 | The Gambler                                  | Terwilliger, George W.         |                                     | tt0366506 |
| 1746577389 | 1962 | 1962 | The Longest Day                              | The Longest Day                              |                                | Ken Annakin                         | tt0056197 |
| 1746520902 | 1949 | 1949 | I Was a Male War Bride                       | I Was a Male War Bride                       | Hawks, Howard                  | Howard Hawks                        | tt0041498 |
| 1746499873 | 1946 | 1945 | Masquerade in Mexico                         | Masquerade in Mexico                         | Leisen, Mitchell               | Mitchell Leisen                     | tt0037903 |
| 1746515577 | 1918 | 1918 | The Girl from Bohemia                        | The Girl from Bohemia                        | McGill, Lawrence B.            | Lawrence B. McGill                  | tt0184518 |
| 1746235060 | 1973 | 1973 | The Last American Hero                       | The Last American Hero                       | Johnson, Lamont                | Lamont Johnson                      | tt0070287 |
| 1746577450 | 1962 | 1962 | Ride the High Country                        | Ride the High Country                        | Peckinpah, Sam                 | Sam Peckinpah                       | tt0056412 |
| 1746420783 | 1993 | 1993 | Sister Act 2: Back in the Habit              | Sister Act 2: Back in the Habit              | Duke, Bill                     | Bill Duke                           | tt0108147 |
| 174655295  | 1956 | 1956 | Meet Me in Las Vegas                         | Meet Me in Las Vegas                         | Rowland, Roy                   | Roy Rowland                         | tt0049490 |
| 1746234827 | 1978 | 1978 | The Cheap Detective                          | The Cheap Detective                          | Moore, Robert                  | Robert Moore                        | tt0077321 |
| 1746574284 | 1950 | 1950 | The Old Frontier                             | The Old Frontier                             | Ford, Philip                   | Philip Ford                         | tt0042801 |

|                   |             |             |                                     |                                     |                                    |                          |                  |
|-------------------|-------------|-------------|-------------------------------------|-------------------------------------|------------------------------------|--------------------------|------------------|
| 1746410755        | 1991        | 1991        | Jungle Fever                        | Jungle Fever                        | Lee, Spike                         | Spike Lee                | tt0102175        |
| 1746503249        | 1918        | 1918        | The Belgian                         | The Belgian                         | Olcott, Sidney                     | Sidney Olcott            | tt0182778        |
| 1746524208        | 1923        | 1923        | The Bishop of the Ozarks            | The Bishop of the Ozarks            | Fox, Finis                         | Finis Fox                | tt0013873        |
| 1746198518        | 1969        | 1968        | Where Eagles Dare                   | Where Eagles Dare                   | Hutton, Brian G.                   | Brian G. Hutton          | tt0065207        |
| 1769970815        | 1915        | 1915        | The Birth of Emotion                | The Birth of Emotion                | Otto, Henry                        | Henry Otto               | tt1284609        |
| 1745342000        | 2002        | 2002        | Dead Above Ground                   | Dead Above Ground                   | Bowman, Chuck                      | Chuck Bowman             | tt0284045        |
| 1746564274        | 1952        | 1951        | Flame of Araby                      | Flame of Araby                      | Lamont, Charles                    | Charles Lamont           | tt0043542        |
| 1746503274        | 1918        | 1918        | The Marriage Lie                    | The Marriage Lie                    | Paton, Stuart                      | Stuart Paton             | tt0009353        |
| 1746524656        | 1915        | 1915        | The Kindling                        | The Kindling                        | DeMille, Cecil B.                  | Cecil B. DeMille         | tt0005589        |
| 1746508885        | 1925        | 1925        | What Fools Men                      | What Fools Men                      | Archainbaud, George                | George Archainbaud       | tt0016513        |
| 1746422064        | 2000        | 1999        | Judy Berlin                         | Judy Berlin                         | Mendelsohn, Eric                   | Eric Mendelsohn          | tt0181618        |
| <b>1746484711</b> | <b>1918</b> | <b>1918</b> | <b>The Soul of Buddha</b>           | <b>The Soul of Buddha</b>           | <b>Edwards, J. Gordon</b>          | <b>J. Gordon Edwards</b> | <b>tt0009637</b> |
| 1769970759        | 1915        | 1915        | Light Fingered Syd                  | Light Fingered Syd                  | De Grey, Sydney                    | Sidney De Gray           | tt1341209        |
| 1746410859        | 1993        | 1992        | Fortress                            | Fortress                            | Gordon, Stuart                     | Stuart Gordon            | tt0106950        |
| 1746436073        | 1940        | 1940        | Cowboy from Sundown                 | The Cowboy from Sundown             | Bennett, Spencer Gordon            | Spencer Gordon Bennet    | tt0032364        |
| 1746580354        | 1935        | 1935        | Mutiny Ahead                        | Mutiny Ahead                        | Atkins, Tommy                      | Thomas Atkins            | tt0026751        |
| 1746198024        | 1970        | 1970        | Trash                               | Trash                               | Morrissey, Paul                    | Paul Morrissey           | tt0066482        |
| 1746585142        | 1929        | 1929        | Hot for Paris                       | Hot for Paris                       | Walsh, Raoul                       | Raoul Walsh              | tt0020001        |
| 1746511769        | 1927        | 1927        | A Yellow Streak                     | A Yellow Streak                     | Wilson, Ben                        | Ben F. Wilson            | tt0018602        |
| 1746424422        | 1942        | 1942        | Texas Manhunt                       | Texas Manhunt                       | Stewart, Peter                     | Sam Newfield             | tt0035424        |
| 1746566999        | 1934        | 1935        | Girl in the Case                    | Girl in the Case                    | Frenke, Eugene                     | Eugene Frenke            | tt0347078        |
| 1746465041        | 1945        | 1945        | Let's Go Steady                     | Let's Go Steady                     | Lord, Del                          | Del Lord                 | tt0037869        |
| 1746515099        | 1920        | 1920        | The Fighting Kentuckians            | The Fighting Kentuckians            | Edwards, J. Harrison               | J. Harrison Edwards      | tt0194883        |
| 1746499896        | 1948        | 1948        | Fighter Squadron                    | Fighter Squadron                    | Walsh, Raoul                       | Raoul Walsh              | tt0040353        |
| 1746578903        | 1958        | 1958        | The Badlanders                      | The Badlanders                      | Daves, Delmer                      | Delmer Daves             | tt0051393        |
| 1746584570        | 1930        | 1930        | The Green Goddess                   | The Green Goddess                   | Green, Alfred                      | Alfred E. Green          | tt0020938        |
| 1746584165        | 1939        | 1939        | Lure of the Wasteland               | Lure of the Wasteland               | Fraser, Harry                      | Harry L. Fraser          | tt0031597        |
| 1769969757        | 1912        | 1912        | A Thrilling Rescue by "Uncle Mun"   | A Thrilling Rescue by Uncle Mun     | Williams, C. J.                    | C.J. Williams            | tt0234885        |
| 1746570148        | 1934        | 1934        | The Cat's-Paw                       | The Cat's Paw                       | Taylor, Sam                        | Sam Taylor               | tt0024961        |
| 1745357712        | 2001        | 2001        | Riding in Cars with Boys            | Riding in Cars with Boys            | Marshall, Penny                    | Penny Marshall           | tt0200027        |
| 1746454690        | 1942        | 1942        | Little Tokyo, U.S.A.                | Little Tokyo, U.S.A.                | Brower, Otto                       | Otto Brower              | tt0034983        |
| 1746507729        | 1926        | 1926        | Forever After                       | Forever After                       | Weight, F. Harmon                  | F. Harmon Weight         | tt0016901        |
| 1746520154        | 1925        | 1925        | Wandering Fires                     | Wandering Fires                     | Campbell, Maurice                  | Maurice Campbell         | tt0016501        |
| 1746578468        | 1950        | 1950        | The Avengers                        | The Avengers                        | Auer, John H.                      | John H. Auer             | tt0167779        |
| 1746569957        | 1960        | 1960        | Can-Can                             | Can Can                             | Lang, Walter                       | Walter Lang              | tt0053690        |
| 1746524465        | 1916        | 1915        | Don Quixote                         | Don Quixote                         | Dillon, Edward                     | Edward Dillon            | tt0005209        |
| 1746524613        | 1916        | 1916        | The Victoria Cross                  | The Victoria Cross                  | Le Saint, E. J.                    | Edward LeSaint           | tt0007516        |
| 1746554304        | 1964        | 1964        | The Curse of the Living Corpse      | The Curse of the Living Corpse      |                                    | Del Tenney               | tt0057985        |
| 1746474952        | 1947        | 1947        | Trailing Danger                     | Trailing Danger                     | Hillyer, Lambert                   | Lambert Hillyer          | tt0039910        |
| 1746185694        | 1968        | 1967        | The Illiac Passion                  | The Illiac Passion                  | Markopoulos, Gregory J.            | Gregory J. Markopoulos   | tt0136261        |
| 1746454245        | 1942        | 1942        | The Rangers Take Over               | The Rangers Take Over               | Herman, Albert                     | Albert Herman            | tt0036292        |
| 1746453557        | 1942        | 1942        | Kings Row                           | Kings Row                           | Wood, Sam                          | Sam Wood                 | tt0034946        |
| 1746435171        | 1942        | 1942        | That Other Woman                    | That Other Woman                    | McCarey, Ray                       | Ray McCarey              | tt0035426        |
| 1746583576        | 1931        | 1931        | Son of the Plains                   | A Son of the Plains                 | Bradbury, Robert North             | Robert N. Bradbury       | tt0022413        |
| 1746501947        | 1916        | 1916        | In the Web of the Grafters          | In the Web of the Grafters          | MacQuarrie, Murdock; Jefferson, Al | Al V. Jefferson          | tt0157816        |
| 1746577889        | 1936        | 1936        | Captain January                     | Captain January                     | Butler, David                      | David Butler             | tt0027421        |
| 1746491747        | 1943        | 1943        | The Woman of the Town               | The Woman of the Town               | Archainbaud, George                | George Archainbaud       | tt0037470        |
| 1746573791        | 1958        | 1958        | The Rawhide Trail                   | The Rawhide Trail                   | Gordon, Robert                     | Robert Gordon            | tt0052122        |
| 1746582272        | 1931        | 1931        | Broadminded                         | Broad Minded                        | LeRoy, Mervyn                      | Mervyn LeRoy             | tt0021697        |
| 1746567693        | 1933        | 1932        | The Death Kiss                      | The Death Kiss                      | Marin, Edwin L.                    | Edwin L. Marin           | tt0023935        |
| 1746507802        | 1924        | 1924        | Tainted Money                       | Tainted Money                       | MacRae, Henry                      | Henry MacRae             | tt0015385        |
| 1746421898        | 1940        | 1940        | Queen of the Mob                    | Queen of the Mob                    | Hogan, James                       | James P. Hogan           | tt0032958        |
| 1746514557        | 1923        | 1923        | Skylarking                          | Skylarking                          | Del Ruth, Roy                      | Roy Del Ruth             | tt0195269        |
| 1746554995        | 1964        | 1964        | The T.A.M.I. Show                   | The T.A.M.I. Show                   | Binder, Steve                      | Steve Binder             | tt0058631        |
| 1746393133        | 1982        | 1982        | The Best Little Whorehouse in Texas | The Best Little Whorehouse in Texas | Higgins, Colin                     | Colin Higgins            | tt0083642        |
| 1746508729        | 1926        | 1926        | The Stolen Ranch                    | The Stolen Ranch                    | Wylar, William                     | William Wylar            | tt0017432        |
| 1746465156        | 1946        | 1946        | Man from Rainbow Valley             | Man from Rainbow Valley             | Springsteen, Robert                | R.G. Springsteen         | tt0038724        |

|            |      |      |                            |                            |                                      |                      |           |
|------------|------|------|----------------------------|----------------------------|--------------------------------------|----------------------|-----------|
| 1746474530 | 1947 | 1947 | Queen of the Amazons       | Queen of the Amazons       | Finney, Edward                       | Edward Finney        | tt0039743 |
| 1746524717 | 1928 | 1928 | The Lookout Girl           | The Look Out Girl          | Fitzgerald, Dallas M.                | Dallas M. Fitzgerald | tt0129210 |
| 1746572433 | 1931 | 1931 | Father's Son               | Father's Son               | Beaudine, William                    | William Beaudine     | tt0021854 |
| 1746561968 | 1957 | 1957 | The Long Haul              | The Long Haul              | Hughes, Ken                          | Ken Hughes           | tt0050653 |
| 1746582928 | 1939 | 1939 | Nurse Edith Cavell         | Nurse Edith Cavell         | Wilcox, Herbert                      | Herbert Wilcox       | tt0031737 |
| 1746571552 | 1932 | 1932 | Ten Minutes to Live        | Ten Minutes to Live        | Micheaux, Oscar                      | Oscar Micheaux       | tt0139639 |
| 1746569713 | 1956 | 1956 | Crime Against Joe          | Crime Against Joe          | Sholem, Lee                          | Lee Sholem           | tt0049105 |
| 1746577433 | 1958 | 1958 | Sorcerers' Village         | Sorcerers' Village         | Davis, Capt. Hassoldt                | Hassoldt Davis       | tt0052222 |
| 1746583169 | 1940 | 1940 | Take Me Back to Oklahoma   | Take Me Back to Oklahoma   | Herman, Al                           | Albert Herman        | tt0033132 |
| 1746583837 | 1931 | 1931 | Way Back Home              | Way Back Home              | Seiter, William                      | William A. Seiter    | tt0022551 |
| 1746568134 | 1933 | 1933 | Before Midnight            | Before Midnight            | Hillyer, Lambert                     | Lambert Hillyer      | tt0024868 |
| 1746583914 | 1930 | 1930 | A Lady to Love             | A Lady to Love             | Seastrom, Victor                     | Victor Sjöström      | tt0021044 |
| 1746464877 | 1941 | 1941 | San Antonio Rose           | San Antonio Rose           | Lamont, Charles                      | Charles Lamont       | tt0034148 |
| 1746496849 | 1919 | 1919 | The Sealed Envelope        | The Sealed Envelope        | Gerrard, Douglas                     | Douglas Gerrard      | tt0010672 |
| 1746410408 | 1985 | 1985 | Sweet Dreams               | Sweet Dreams               | Reisz, Karel                         | Karel Reisz          | tt0090110 |
| 1746260916 | 1980 | 1980 | Can't Stop the Music       | Can't Stop the Music       | Walker, Nancy                        | Nancy Walker         | tt0080492 |
| 1746583205 | 1929 | 1929 | The Invaders               | The Invaders               | McGowan, J. P.                       | J.P. McGowan         | tt0020029 |
| 1746570450 | 1953 | 1953 | The Knockout Parade        | The Knockout Parade        | Roberts, Joe                         | Joe Roberts          | tt1173952 |
| 1746198028 | 1965 | 1965 | Those Calloways            | Those Calloways            | Tokar, Norman                        | Norman Tokar         | tt0059796 |
| 1746580555 | 1938 | 1938 | Speed to Burn              | Speed to Burn              | Brower, Otto                         | Otto Brower          | tt0030778 |
| 1746566205 | 1954 | 1954 | The Lonely Night           | The Lonely Night           | Jacoby, Irving                       | Irving Jacoby        | tt0360750 |
| 1746434630 | 1998 | 1998 | Half Baked                 | Half Baked                 | Davis, Tamra                         | Tamra Davis          | tt0120693 |
| 1746507863 | 1949 | 1949 | Zamba                      | Zamba                      | Berke, William                       | William Berke        | tt0042064 |
| 1746581947 | 1930 | 1929 | Overland Bound             | Overland Bound             | Maloney, Leo                         | Leo D. Maloney       | tt0020250 |
| 1746564814 | 1953 | 1953 | Clipped Wings              | Clipped Wings              | Bernds, Edward                       | Edward Berndts       | tt0045633 |
| 1746423580 | 1994 | 1993 | Body Snatchers             | Body Snatchers             | Ferrara, Abel                        | Abel Ferrara         | tt0106452 |
| 1746439149 | 1940 | 1940 | A Little Bit of Heaven     | A Little Bit of Heaven     | Marton, Andrew                       | Andrew Marton        | tt0032714 |
| 1746465237 | 1942 | 1942 | Stagecoach Express         | Stagecoach Express         | Sherman, George                      | George Sherman       | tt0035377 |
| 1746507826 | 1926 | 1926 | The Marriage Clause        | The Marriage Clause        | Weber, Lois                          | Lois Weber           | tt0017122 |
| 1746570996 | 1934 | 1934 | Bolero                     | Bolero                     | Ruggles, Wesley                      | Wesley Ruggles       | tt0024903 |
| 1746248533 | 1967 | 1967 | Tammy and the Millionaire  | Tammy and the Millionaire  | Miller, Sidney; Stone, Ezra; Goodwin | Leslie Goodwins      | tt0062334 |
| 1746577368 | 1959 | 1959 | It Started with a Kiss     | It Started with a Kiss     | Marshall, George                     | George Marshall      | tt0052934 |
| 1746524748 | 1923 | 1923 | Broken Hearts of Broadway  | Broken Hearts of Broadway  |                                      | Irving Cummings      | tt0013896 |
| 1746410433 | 1988 | 1988 | A Cry in the Dark          | A Cry in the Dark          | Schepisi, Fred                       | Fred Schepisi        | tt0094924 |
| 1746578601 | 1961 | 1961 | Run Across the River       | Run Across the River       | Chambers, Everett                    | Everett Chambers     | tt0271151 |
| 1746454359 | 1941 | 1941 | Nothing But the Truth      | Nothing But the Truth      | Nugent, Elliott                      | Elliott Nugent       | tt0033963 |
| 1746532986 | 1915 | 1915 | Her Shattered Idol         | Her Shattered Idol         | O'Brien, John D.                     | John B. O'Brien      | tt0005477 |
| 1746454955 | 1941 | 1941 | A Yank in the R.A.F.       | A Yank in the R.A.F.       | King, Henry                          | Henry King           | tt0034405 |
| 1745373172 | 2008 | 2007 | Shotgun Stories            | Shotgun Stories            | Nichols, Jeff                        | Jeff Nichols         | tt0952682 |
| 1746209364 | 1966 | 1966 | Hallucination Generation   | Hallucination Generation   | Mann, Edward Andrew                  | Edward Mann          | tt0060488 |
| 1746577686 | 1933 | 1933 | Cheating Blondes           | Cheating Blondes           | Levering, Joseph                     | Joseph Levering      | tt0023883 |
| 1746208196 | 1970 | 1969 | Scratch Harry              | Scratch Harry              | Matter, Alex                         | Alex Matter          | tt0064947 |
| 1746438148 | 1943 | 1943 | The Girl from Monterrey    | The Girl from Monterrey    | Fox, Wallace                         | Wallace Fox          | tt0035943 |
| 1746545066 | 1940 | 1940 | The Lone Wolf Keeps a Date | The Lone Wolf Keeps a Date | Salkow, Sidney                       | Sidney Salkow        | tt0033848 |
| 1746578007 | 1937 | 1937 | Hoosier Schoolboy          | Hoosier Schoolboy          | Nigh, William                        | William Nigh         | tt0029019 |
| 1746419769 | 1991 | 1991 | Run                        | Run                        | Burrowes, Geoff                      | Geoff Burrowes       | tt0102818 |
| 1746500000 | 1948 | 1948 | Madonna of the Desert      | Madonna of the Desert      | Blair, George                        | George Blair         | tt0040561 |
| 1746409042 | 1989 | 1989 | Trust Me                   | Trust Me                   | Houston, Bobby                       | Robert Houston       | tt0098529 |
| 1746454386 | 1942 | 1942 | Woman of the Year          | Woman of the Year          | Stevens, George                      | George Stevens       | tt0035567 |
| 1746580887 | 1938 | 1938 | Wives Under Suspicion      | Wives Under Suspicion      | Whale, James                         | James Whale          | tt0030981 |
| 1746513827 | 1916 | 1916 | Dorian's Divorce           | Dorian's Divorce           | Lund, O. A. C.                       | O.A.C. Lund          | tt0157552 |
| 1746560983 | 1932 | 1932 | Vanity Fair                | Vanity Fair                | Franklin, Chester M.                 | Chester M. Franklin  | tt0023652 |
| 1746574255 | 1963 | 1963 | Twilight of Honor          | Twilight of Honor          | Sagal, Boris                         | Boris Sagal          | tt0057609 |
| 1746583769 | 1929 | 1929 | The Clean-Up               | The Clean Up               | McEveety, Bernard F.                 | Bernard McEveety     | tt0019772 |
| 1746235544 | 1977 | 1977 | Julia                      | Julia                      | Zinnemann, Fred                      | Fred Zinnemann       | tt0076245 |
| 1746508150 | 1924 | 1924 | Revelation                 | Revelation                 | Baker, George D.                     | George D. Baker      | tt0015272 |
| 1746499962 | 1948 | 1948 | Phantom Valley             | Phantom Valley             | Nazarro, Ray                         | Ray Nazarro          | tt0040691 |



|                   |             |             |                                       |                                       |                             |                            |                  |          |
|-------------------|-------------|-------------|---------------------------------------|---------------------------------------|-----------------------------|----------------------------|------------------|----------|
| 1746584245        | 1935        | 1935        | Danger Trails                         | Danger Trails                         | Hill, Bob                   | Robert F. Hill             | tt0026260        |          |
| 1746436268        | 2000        | 1999        | Catfish in Black Bean Sauce           | Catfish in Black Bean Sauce           | Lo, Chi Muoi                | Chi Muoi Lo                | tt0162903        |          |
| 1746507856        | 1926        | 1926        | Then Came the Woman                   | Then Came the Woman                   | Hartford, David             | David Hartford             | tt0017459        |          |
| 1746524730        | 1922        | 1922        | Channing of the Northwest             | Channing of the Northwest             | Ince, Ralph                 | Ralph Ince                 | tt0013009        |          |
| 1746576722        | 1931        | 1931        | The Secret Witness                    | The Secret Witness                    | Freeland, Thornton          | Thornton Freeland          | tt0022358        |          |
| 1746580278        | 1939        | 1939        | The Sun Never Sets                    | The Sun Never Sets                    | Lee, Rowland V.             | Rowland V. Lee             | tt0022448        |          |
| 1746583455        | 1931        | 1931        | Gun Smoke                             | Gun Smoke                             | Sloman, Edward              | Edward Sloman              | tt0021935        |          |
| 1746433728        | 1996        | 1996        | Feeling Minnesota                     | Feeling Minnesota                     | Baigelman, Steven           | Steven Baigelman           | tt0116289        |          |
| 1746566365        | 1953        | 1953        | Abbott and Costello Go to Mars        | Abbott and Costello Go to Mars        | Lamont, Charles             | Charles Lamont             | tt0045468        |          |
| <b>1746394227</b> | <b>1986</b> | <b>1986</b> | <b>April Fool's Day</b>               | <b>April Fool's Day</b>               | <b>Walton, Fred</b>         | <b>Fred Walton</b>         | <b>tt0090655</b> | <b>1</b> |
| 1746438204        | 1942        | 1942        | What's Cookin'?                       | What's Cookin'                        | Cline, Edward F.            | Edward F. Cline            | tt0035548        |          |
| 1746520935        | 1948        | 1948        | Wake of the Red Witch                 | Wake of the Red Witch                 | Ludwig, Edward              | Edward Ludwig              | tt0040946        |          |
| 1746578708        | 1961        | 1961        | Wild in the Country                   | Wild in the Country                   | Dunne, Philip               | Philip Dunne               | tt0055623        |          |
| <b>1746520363</b> | <b>1924</b> | <b>1924</b> | <b>South of the Equator</b>           | <b>South of the Equator</b>           | <b>Craft, William James</b> | <b>William James Craft</b> | <b>tt0165955</b> | <b>1</b> |
| 1746577219        | 1958        | 1957        | This Angry Age                        | This Angry Age                        | Clément, René               | René Clément               | tt0051400        |          |
| 1746583584        | 1931        | 1931        | Skyline                               | Skyline                               | Taylor, Sam                 | Sam Taylor                 | tt0022400        |          |
| 1745341000        | 2002        | 2002        | We Were Soldiers                      | We Were Soldiers                      | Wallace, Randall            | Randall Wallace            | tt0277434        |          |
| 1746509484        | 1927        | 1927        | Paying the Price                      | Paying the Price                      | Selman, David               | David Selman               | tt0018254        |          |
| 1746582460        | 1937        | 1937        | Sing and Be Happy                     | Sing and Be Happy                     | Tinling, James              | James Tinling              | tt0029567        |          |
| <b>1746584102</b> | <b>1939</b> | <b>1939</b> | <b>That's Right--You're Wrong</b>     | <b>That's Right You're Wrong</b>      | <b>Butler, David</b>        | <b>David Butler</b>        | <b>tt0032015</b> | <b>1</b> |
| 1746560939        | 1965        | 1965        | Fluffy                                | Fluffy                                | Bellamy, Earl               | Earl Bellamy               | tt0059188        |          |
| 1746577529        | 1935        | 1935        | Outlawed Guns                         | Outlawed Guns                         | Taylor, Ray                 | Ray Taylor                 | tt0026838        |          |
| 1745358904        | 2003        | 2003        | The Recruit                           | The Recruit                           | Donaldson, Roger            | Roger Donaldson            | tt0292506        |          |
| 1746475902        | 1947        | 1947        | Last of the Redmen                    | Last of the Redmen                    | Sherman, George             | George Sherman             | tt0039554        |          |
| 1746585194        | 1928        | 1928        | Tyrant of Red Gulch                   | Tyrant of Red Gulch                   | De Lacy, Robert             | Robert De Lacey            | tt0019505        |          |
| 1745342853        | 2004        | 2004        | Meet the Fockers                      | Meet the Fockers                      | Roach, Jay                  | Jay Roach                  | tt0290002        |          |
| 1769970651        | 1968        | 1968        | Ready for Anything!                   | Ready for Anything!                   | Darcia                      | Irvin Berwick              | tt0256314        |          |
| 1746553486        | 1965        | 1965        | The Great Race                        | The Great Race                        | Edwards, Blake              | Blake Edwards              | tt0059243        |          |
| 1746433555        | 1999        | 1999        | Teaching Mrs. Tingle                  | Teaching Mrs. Tingle                  | Williamson, Kevin           | Kevin Williamson           | tt0133046        |          |
| 1746453470        | 1942        | 1942        | A Man's World                         | A Man's World                         | Barton, Charles             | Charles Barton             | tt0035032        |          |
| 1746492473        | 1947        | 1947        | Juke Joint                            | Juke Joint                            | Williams, Spencer           | Spencer Williams           | tt0039521        |          |
| 1746574354        | 1963        | 1963        | The Skydivers                         | The Skydivers                         | Francis, Coleman            | Coleman Francis            | tt0057507        |          |
| 1746503309        | 1922        | 1922        | Shadows of the Sea                    | Shadows of the Sea                    | Crosland, Alan              | Alan Crosland              | tt0013593        |          |
| 1746555832        | 1955        | 1955        | New Orleans Uncensored                | New Orleans Uncensored                | Castle, William             | William Castle             | tt0048420        |          |
| 1745293332        | 2006        | 2006        | Larry the Cable Guy: Health Inspector | Larry the Cable Guy: Health Inspector | Cooper, Trent               | Trent Cooper               | tt0462395        |          |
| 1746503719        | 1921        | 1921        | The Burden of Race                    | The Burden of Race                    |                             |                            | tt0012015        |          |
| 1769971899        | 1969        | 1969        | The Girl From Pussy Cat               | The Girl from Pussycat                |                             | Smythe David               | tt0137708        |          |
| 1745341330        | 2009        | 2009        | Hotel for Dogs                        | Hotel for Dogs                        | Freudenthal, Thor           | Thor Freudenthal           | tt0785006        |          |
| 1746508995        | 1925        | 1925        | Stampedin' Trouble                    | Stampedin' Trouble                    | Sheldon, Forrest            | Forrest Sheldon            | tt0341005        |          |
| 1746520400        | 1926        | 1926        | Into Her Kingdom                      | Into Her Kingdom                      | Gade, Svend                 | Svend Gade                 | tt0016998        |          |
| 1746584010        | 1939        | 1939        | Mr. Moto's Last Warning               | Mr. Moto's Last Warning               | Foster, Norman              | Norman Foster              | tt0031678        |          |
| 1746562199        | 1953        | 1953        | House of Wax                          | House of Wax                          | DeToth, Andre               | André De Toth              | tt0045888        |          |
| 1746574188        | 1956        | 1956        | Tea and Sympathy                      | Tea and Sympathy                      | Minnelli, Vincente          | Vincente Minnelli          | tt0049829        |          |
| 1746465202        | 1947        | 1947        | Hi De Ho                              | Hi De Ho                              | Binney, Josh                | Josh Binney                | tt0039460        |          |
| 1746186046        | 1968        | 1968        | Where Angels Go ... Trouble Follows!  | Where Angels Go Trouble Follows!      | Neilson, James              | James Neilson              | tt0063800        |          |
| 1769969755        | 1912        | 1912        | A Queen for a Day                     | A Queen for a Day                     |                             | C.J. Williams              | tt0228758        |          |
| 1746454506        | 1999        | 1999        | The Sixth Sense                       | The Sixth Sense                       | Shyamalan, M. Night         | M. Night Shyamalan         | tt0167404        |          |
| 1746233531        | 1966        | 1966        | Intimacy                              | Intimacy                              | Stoloff, Victor             | Victor Stoloff             | tt0060542        |          |
| 1746520325        | 1926        | 1926        | Exit Smiling                          | Exit Smiling                          | Taylor, Sam                 | Sam Taylor                 | tt0016832        |          |
| 1746573214        | 1931        | 1931        | Mata Hari                             | Mata Hari                             | Fitzmaurice, George         | George Fitzmaurice         | tt0023196        |          |
| 1746581009        | 1959        | 1959        | Journey to the Center of the Earth    | Journey to the Center of the Earth    | Levin, Henry                | Henry Levin                | tt0052948        |          |
| 1746520030        | 1949        | 1949        | Search for Danger                     | Search for Danger                     | Bernhard, Jack              | Jack Bernhard              | tt0041854        |          |
| 1746577440        | 1951        | 1951        | An American in Paris                  | An American in Paris                  | Minnelli, Vincente          | Vincente Minnelli          | tt0043278        |          |
| 1746583736        | 1929        | 1929        | Girls Who Dare                        | Girls Who Dare                        | Mattison, Frank S.          | Frank S. Mattison          | tt0133804        |          |
| 1746502198        | 1910        | 1910        | Wilful Peggy                          | Wilful Peggy                          | Griffith, D. W.             | D.W. Griffith              | tt0001458        |          |
| 1746422308        | 1994        | 1994        | The Santa Clause                      | The Santa Clause                      | Pasquin, John               | John Pasquin               | tt0111070        |          |
| 1746574108        | 1961        | 1961        | Twist Around the Clock                | Twist Around the Clock                | Rudolph, Oscar              | Oscar Rudolph              | tt0055554        |          |

|            |      |      |                                       |                                       |                                     |                        |           |
|------------|------|------|---------------------------------------|---------------------------------------|-------------------------------------|------------------------|-----------|
| 1746439155 | 1943 | 1942 | Over My Dead Body                     | Over My Dead Body                     | St. Clair, Malcolm                  | Malcolm St. Clair      | tt0035164 |
| 1746524606 | 1927 | 1927 | Your Wife and Mine                    | Your Wife and Mine                    | O'Connor, Frank                     | Frank O'Connor         | tt0184062 |
| 1746513431 | 1915 | 1915 | A Submarine Pirate                    | A Submarine Pirate                    | Avery, Charles; Chaplin, Sydney     | Charles Avery          | tt0006115 |
| 1746580622 | 1935 | 1935 | She Gets Her Man                      | She Gets Her Man                      | Nigh, William                       | William Nigh           | tt0026985 |
| 1746583650 | 1930 | 1930 | Billy the Kid                         | Billy the Kid                         | Vidor, King                         | King Vidor             | tt0020693 |
| 1746525010 | 1914 | 1914 | The Ring and the Man                  | The Ring and the Man                  | Powers, Francis                     | Francis Powers         | tt0004535 |
| 1746584086 | 1935 | 1935 | Ginger                                | Ginger                                | Seiler, Lewis                       | Lewis Seiler           | tt0026410 |
| 1746523701 | 1928 | 1928 | Life's Crossroads                     | Life's Crossroads                     | Lewis, Edgar                        | Edgar Lewis            | tt0019092 |
| 1746569789 | 1957 | 1957 | Zombies of Mora-Tau                   | Zombies of Mora Tau                   | Cahn, Edward                        | Edward L. Cahn         | tt0051226 |
| 1746520366 | 1926 | 1926 | The Girl From Montmartre              | The Girl from Montmartre              | Green, Alfred E.                    | Alfred E. Green        | tt0016924 |
| 1746234834 | 1966 | 1966 | What Did You Do in the War, Daddy?    | What Did You Do in the War, Daddy?    | Edwards, Blake                      | Blake Edwards          | tt0061176 |
| 1746583081 | 1938 | 1938 | Smashing the Spy Ring                 | Smashing the Spy Ring                 | Cabanne, Christy                    | Christy Cabanne        | tt0031938 |
| 1746562365 | 1953 | 1953 | The Last Posse                        | The Last Posse                        | Werker, Alfred                      | Alfred L. Werker       | tt0045986 |
| 1746410394 | 1991 | 1991 | Return to the Blue Lagoon             | Return to the Blue Lagoon             | Graham, William A.                  | William A. Graham      | tt0102782 |
| 1746198435 | 1969 | 1969 | If It's Tuesday, This Must Be Belgium | If It's Tuesday, This Must Be Belgium | Stuart, Mel                         | Mel Stuart             | tt0064471 |
| 1746566325 | 1954 | 1954 | Arrow in the Dust                     | Arrow in the Dust                     | Selander, Lesley                    | Lesley Selander        | tt0046722 |
| 1746584785 | 1930 | 1930 | Beyond the Rio Grande                 | Beyond the Rio Grande                 | Webb, Harry                         | Harry S. Webb          | tt0020682 |
| 1746584901 | 1939 | 1939 | Sweepstakes Winner                    | Sweepstakes Winner                    | McGann, William                     | William C. McGann      | tt0031997 |
| 1746508514 | 1949 | 1949 | The Doolins of Oklahoma               | The Doolins of Oklahoma               | Douglas, Gordon                     | Gordon Douglas         | tt0041308 |
| 1746570979 | 1933 | 1933 | Ladies They Talk About                | Ladies They Talk About                | Bretherton, Howard; Keighley, Willi | Howard Bretherton      | tt0024238 |
| 1746465138 | 1941 | 1941 | This Woman Is Mine                    | This Woman Is Mine                    | Lloyd, Frank                        | Frank Lloyd            | tt0034285 |
| 1746436201 | 2000 | 1999 | The Girl Next Door                    | The Girl Next Door                    | Fugate, Christine                   | Christine Fugate       | tt0189553 |
| 1746566069 | 1957 | 1957 | Jungle Heat                           | Jungle Heat                           | Koch, Howard W.                     | Howard W. Koch         | tt0050579 |
| 1746454074 | 1944 | 1944 | Together Again                        | Together Again                        | Vidor, Charles                      | Charles Vidor          | tt0037384 |
| 1745340128 | 2003 | 2003 | Party Monster                         | Party Monster                         | Bailey, Fenton ; Barbato, Randy     | Fenton Bailey          | tt0320244 |
| 1746423304 | 1990 | 1990 | Edward Scissorhands                   | Edward Scissorhands                   | Burton, Tim                         | Tim Burton             | tt0099487 |
| 1746583924 | 1931 | 1931 | The Guilty Generation                 | The Guilty Generation                 | Lee, Rowland V.                     | Rowland V. Lee         | tt0021932 |
| 1746467822 | 1917 | 1917 | Married in Name Only                  | Married in Name Only                  | Lawrence, Edmund                    | Edmund Lawrence        | tt0008273 |
| 1746497854 | 1919 | 1919 | The Battler                           | The Battler                           | Reicher, Frank                      | Frank Reicher          | tt0009907 |
| 1746499926 | 1948 | 1948 | Oklahoma Badlands                     | Oklahoma Badlands                     | Canutt, Yakima                      | Yakima Canutt          | tt0040659 |
| 1746186073 | 1967 | 1967 | The Ride to Hangman's Tree            | Ride to Hangman's Tree                | Rafkin, Alan                        | Alan Rafkin            | tt0062198 |
| 1746508759 | 1949 | 1949 | The Dalton Gang                       | The Dalton Gang                       | Beebe, Ford                         | Ford Beebe             | tt0041276 |
| 1746555635 | 1956 | 1956 | Frontier Woman                        | Frontier Woman                        | Ormond, Ron                         | Ron Ormond             | tt0048097 |
| 1746572974 | 1932 | 1932 | Life Begins                           | Life Begins                           | Flood, James                        | James Flood            | tt0023139 |
| 1746513077 | 1916 | 1916 | Ben Blair                             | Ben Blair                             | Taylor, William D.                  | William Desmond Taylor | tt0006417 |
| 1746475989 | 1947 | 1947 | Dick Tracy's Dilemma                  | Dick Tracy's Dilemma                  | Rawlins, John                       | John Rawlins           | tt0039321 |
| 1746433685 | 1992 | 1992 | Sister Act                            | Sister Act                            | Ardolino, Emile                     | Emile Ardolino         | tt0105417 |
| 1746500706 | 1924 | 1924 | A Society Scandal                     | A Society Scandal                     | Dwan, Allan                         | Allan Dwan             | tt0015349 |
| 1746523741 | 1915 | 1915 | The Marble Heart                      | The Marble Heart                      | Lessey, George A.                   | George Lessey          | tt0005713 |
| 1746577837 | 1934 | 1935 | White Lies                            | White Lies                            | Bulgakov, Leo                       | Leo Bulgakov           | tt0027209 |
| 1746508750 | 1925 | 1925 | Where Was I?                          | Where Was I?                          | Seiter, William A.                  | William A. Seiter      | tt0016519 |
| 1746453591 | 1942 | 1942 | Rock River Renegades                  | Rock River Renegades                  | Luby, S. Roy                        | S. Roy Luby            | tt0035263 |
| 1746218862 | 1972 | 1972 | Frogs                                 | Frogs                                 | McCowan, George                     | George McCowan         | tt0068615 |
| 1746504099 | 1919 | 1919 | Open Your Eyes                        | Open Your Eyes                        | Hamilton, Gilbert P.                | Gilbert P. Hamilton    | tt0010532 |
| 1746584368 | 1939 | 1939 | Wings of the Navy                     | Wings of the Navy                     | Bacon, Lloyd                        | Lloyd Bacon            | tt0032130 |
| 1746199732 | 1968 | 1968 | Devil in Velvet                       | The Devil in Velvet                   | Crane, Larry                        | Larry Crane            | tt0216694 |
| 1746512585 | 1916 | 1916 | Human Driftwood                       | Human Driftwood                       | Chautard, Emile                     | Emile Chautard         | tt0006833 |
| 1746422163 | 1992 | 1992 | Lethal Weapon 3                       | Lethal Weapon 3                       | Donner, Richard                     | Richard Donner         | tt0104714 |
| 1746502816 | 1916 | 1916 | Shoes                                 | Shoes                                 | Weber, Lois                         | Lois Weber             | tt0007340 |
| 1746219618 | 1973 | 1973 | The Doll Squad                        | The Doll Squad                        | Mikels, Ted V.                      | Ted V. Mikels          | tt0069986 |
| 1746582682 | 1938 | 1938 | Hold That Co-Ed                       | Hold That Co ed                       | Marshall, George                    | George Marshall        | tt0030239 |
| 1746525178 | 1920 | 1920 | The Inferior Sex                      | The Inferior Sex                      | Henabery, Joseph                    | Joseph Henabery        | tt0011332 |
| 1769976691 | 1979 | 1979 | Unidentified Flying Oddball           | Unidentified Flying Oddball           | Mayberry, Russ                      | Russ Mayberry          | tt0080062 |
| 1746465381 | 1946 | 1946 | Cloak and Dagger                      | Cloak and Dagger                      | Lang, Fritz                         | Fritz Lang             | tt0038417 |
| 1746571298 | 1934 | 1934 | The Merry Frinks                      | The Merry Frinks                      | Green, Alfred E.                    | Alfred E. Green        | tt0025492 |
| 1746578503 | 1962 | 1962 | To Kill a Mockingbird                 | To Kill a Mockingbird                 | Mulligan, Robert                    | Robert Mulligan        | tt0056592 |
| 1746509290 | 1926 | 1926 | Her Big Adventure                     | Her Big Adventure                     | Ince, John                          | John Ince              | tt0016956 |

|            |      |      |                                 |                                 |                                                   |                         |           |
|------------|------|------|---------------------------------|---------------------------------|---------------------------------------------------|-------------------------|-----------|
| 1746502195 | 1915 | 1915 | The Spanish Jade                | The Spanish Jade                | Lucas, Wilfred                                    | Wilfred Lucas           | tt0006080 |
| 1746562151 | 1957 | 1957 | Destination 60,000              | Destination 60,000              | Waggner, George                                   | George Waggner          | tt0050309 |
| 1769970821 | 1912 | 1912 | The Reformation of Kid Hogan    | The Reformation of Kid Hogan    |                                                   | Lloyd B. Carleton       | tt0358072 |
| 1746577904 | 1938 | 1938 | Breaking the Ice                | Breaking the Ice                | Cline, Edward F.                                  | Edward F. Cline         | tt0029945 |
| 1746513633 | 1927 | 1927 | Jaws of Steel                   | Jaws of Steel                   | Enright, Ray                                      | Ray Enright             | tt0018036 |
| 1746248362 | 1966 | 1966 | Good Times, Wonderful Times     | Good Times, Wonderful Times     | Rogosin, Lionel                                   | Lionel Rogosin          | tt0144017 |
| 1746482885 | 1917 | 1917 | The Rescue                      | The Rescue                      | Park, Ida May                                     | Ida May Park            | tt0008508 |
| 1746511783 | 1923 | 1923 | To the Ladies                   | To the Ladies                   | Cruze, James                                      | James Cruze             | tt0014552 |
| 1746582599 | 1938 | 1938 | Jezebel                         | Jezebel                         | Wylar, William                                    | William Wylar           | tt0030287 |
| 1746568339 | 1934 | 1934 | Wharf Angel                     | Wharf Angel                     | Menzies, William Cameron; Somnes, William Cameron | William Cameron Menzies | tt0025972 |
| 1769977772 | 1988 | 1988 | The Chocolate War               | The Chocolate War               | Gordon, Keith                                     | Keith Gordon            | tt0094869 |
| 1746520094 | 1923 | 1923 | It Happened Out West            | It Happened Out West            |                                                   |                         | tt0014159 |
| 1746520252 | 1927 | 1927 | The Night Bride                 | Night Bride                     | Hopper, E. Mason                                  | E. Mason Hopper         | tt0018201 |
| 1745340508 | 2004 | 2003 | Happy Hour                      | Happy Hour                      | Bencivenga, Mike                                  | Mike Bencivenga         | tt0282543 |
| 1746464950 | 1944 | 1944 | Secrets of Scotland Yard        | Secrets of Scotland Yard        | Blair, George                                     | George Blair            | tt0037255 |
| 1746584515 | 1930 | 1929 | Sagebrush Politics              | Sagebrush Politics              | Adamson, Victor                                   | Victor Adamson          | tt0021328 |
| 1746409763 | 1989 | 1989 | The Return of Swamp Thing       | The Return of Swamp Thing       | Wynorski, Jim                                     | Jim Wynorski            | tt0098193 |
| 1746566268 | 1956 | 1956 | High Society                    | High Society                    | Walters, Charles                                  | Charles Walters         | tt0049314 |
| 1746197878 | 1966 | 1966 | The Oscar                       | The Oscar                       | Rouse, Russell                                    | Russell Rouse           | tt0060801 |
| 1746514942 | 1910 | 1910 | The Master Mechanic             | The Master Mechanic             |                                                   |                         | tt1798277 |
| 1746496836 | 1918 | 1918 | Hidden Pearls                   | The Hidden Pearls               | Melford, George H.                                | George Melford          | tt0009173 |
| 1745293157 | 2007 | 2006 | Eye of the Dolphin              | Eye of the Dolphin              | Sellers, Michael D.                               | Michael D. Sellers      | tt0465407 |
| 1746410022 | 1981 | 1981 | The Burning                     | The Burning                     | Maylam, Tony                                      | Tony Maylam             | tt0082118 |
| 1746576292 | 1931 | 1931 | Men in Her Life                 | Men in Her Life                 | Beaudine, William                                 | William Beaudine        | tt0022137 |
| 1746569888 | 1955 | 1955 | Summertime                      | Summertime                      | Lean, David                                       | David Lean              | tt0048673 |
| 1746422918 | 1994 | 1994 | Greedy                          | Greedy                          | Lynn, Jonathan                                    | Jonathan Lynn           | tt0109936 |
| 1769970383 | 1932 | 1932 | Artistic Temper                 | Artistic Temper                 | Mack, Roy                                         | Roy Mack                | tt0022429 |
| 1746567954 | 1932 | 1932 | Fast Companions                 | Fast Companions                 | Neumann, Kurt                                     | Kurt Neumann            | tt0022881 |
| 1746435159 | 1940 | 1940 | It's a Date                     | It's a Date                     | Seiter, William A.                                | William A. Seiter       | tt0032644 |
| 1746422021 | 1993 | 1993 | A Dangerous Woman               | A Dangerous Woman               | Gyllenhaal, Stephen                               | Stephen Gyllenhaal      | tt0106661 |
| 1746434329 | 1992 | 1992 | Lorenzo's Oil                   | Lorenzo's Oil                   | Miller, George                                    | George Miller           | tt0104756 |
| 1746582437 | 1936 | 1936 | Rainbow on the River            | Rainbow on the River            | Neumann, Kurt                                     | Kurt Neumann            | tt0028157 |
| 1746570849 | 1934 | 1934 | Good Dame                       | Good Dame                       | Gering, Marion                                    | Marion Gering           | tt0025192 |
| 1746581495 | 1961 | 1961 | All Hands on Deck               | All Hands on Deck               | Taurog, Norman                                    | Norman Taurog           | tt0054613 |
| 1746578046 | 1938 | 1938 | Little Orphan Annie             | Little Orphan Annie             | Holmes, Ben                                       | Ben Holmes              | tt0030375 |
| 1745340183 | 2003 | 2003 | Anger Management                | Anger Management                | Segal, Peter                                      | Peter Segal             | tt0305224 |
| 1746582936 | 1937 | 1937 | Missing Witnesses               | Missing Witnesses               | Clemens, William                                  | William Clemens         | tt0029253 |
| 1746393625 | 1985 | 1985 | Commando                        | Commando                        | Lester, Mark L.                                   | Mark L. Lester          | tt0088944 |
| 1746574583 | 1938 | 1938 | Everybody Sing                  | Everybody Sing                  | Marin, Edwin L.                                   | Edwin L. Marin          | tt0030108 |
| 1746422126 | 1982 | 1982 | Burden of Dreams                | Burden of Dreams                | Blank, Les                                        | Les Blank               | tt0083702 |
| 1746565217 | 1953 | 1953 | Champ for a Day                 | Champ for a Day                 | Seiter, William A.                                | William A. Seiter       | tt0045619 |
| 1745359252 | 2004 | 2004 | Around the World in 80 Days     | Around the World in 80 Days     | Coraci, Frank                                     | Frank Coraci            | tt0327437 |
| 1745309497 | 2005 | 2005 | The Brothers Grimm              | The Brothers Grimm              | Gilliam, Terry                                    | Terry Gilliam           | tt0355295 |
| 1745372639 | 2002 | 2002 | Confessions of a Dangerous Mind | Confessions of a Dangerous Mind | Clooney, George                                   | George Clooney          | tt0270288 |
| 1746485931 | 1918 | 1918 | The Testing of Mildred Vane     | The Testing of Mildred Vane     | Lucas, Wilfred                                    | Wilfred Lucas           | tt0009687 |
| 1746582527 | 1935 | 1935 | Music Is Magic                  | Music Is Magic                  | Marshall, George                                  | George Marshall         | tt0026747 |
| 1746555157 | 1954 | 1954 | Siege at Red River              | Siege at Red River              | Maté, Rudolph                                     | Rudolph Maté            | tt0047488 |
| 1746454606 | 1942 | 1942 | Submarine Raider                | Submarine Raider                | Landers, Lew                                      | Lew Landers             | tt0035391 |
| 1746582745 | 1938 | 1938 | The Mad Miss Manton             | The Mad Miss Manton             | Jason, Leigh                                      | Leigh Jason             | tt0030396 |
| 1746503488 | 1920 | 1920 | Smoldering Embers               | Smoldering Embers               | Keenan, Frank                                     | Frank Keenan            | tt0152485 |
| 1745272664 | 2000 | 2000 | Remember the Titans             | Remember the Titans             | Yakin, Boaz                                       | Boaz Yakin              | tt0210945 |
| 1746208960 | 1966 | 1966 | Any Wednesday                   | Any Wednesday                   | Miller, Robert Ellis                              | Robert Ellis Miller     | tt0060112 |
| 1746475716 | 1947 | 1947 | The Stranger from Ponca City    | The Stranger from Ponca City    | Abrahams, Derwin                                  | Derwin Abrahams         | tt0240045 |
| 1746421142 | 1993 | 1993 | The Pelican Brief               | The Pelican Brief               | Pakula, Alan J.                                   | Alan J. Pakula          | tt0107798 |
| 1746420513 | 1994 | 1994 | Dumb and Dumber                 | Dumb and Dumber                 | Farrelly, Peter                                   | Peter Farrelly          | tt0109686 |
| 1746585431 | 1939 | 1939 | Lady of the Tropics             | Lady of the Tropics             | Conway, Jack                                      | Jack Conway             | tt0031549 |
| 1746572560 | 1931 | 1931 | The Homicide Squad              | Homicide Squad                  | Melford, George; Cahn, Edward L.                  | Edward L. Cahn          | tt0021967 |

|            |      |      |                                         |                                         |                                |                      |           |
|------------|------|------|-----------------------------------------|-----------------------------------------|--------------------------------|----------------------|-----------|
| 1746581019 | 1958 | 1958 | The Last Hurrah                         | The Last Hurrah                         | Ford, John                     | John Ford            | tt0051845 |
| 1746410854 | 1982 | 1982 | The Junkman                             | The Junkman                             | Halicki, H. B.                 | H.B. Halicki         | tt0084184 |
| 1746583734 | 1931 | 1931 | Air Eagles                              | Air Eagles                              | Whitman, Phil                  | Phil Whitman         | tt0021591 |
| 1746501399 | 1915 | 1915 | The Cheat                               | The Cheat                               |                                | Cecil B. DeMille     | tt0005078 |
| 1746516267 | 1920 | 1920 | The Fighting Shepherdess                | The Fighting Shepherdess                | José, Edward                   | Edward José          | tt0011181 |
| 1746583553 | 1929 | 1929 | Hallelujah                              | Hallelujah                              | Vidor, King                    | King Vidor           | tt0019959 |
| 1746423045 | 1994 | 1994 | Guarding Tess                           | Guarding Tess                           | Wilson, Hugh                   | Hugh Wilson          | tt0109951 |
| 1746454801 | 1997 | 1997 | 'Til There Was You                      | 'Til There Was You                      | Winant, Scott                  | Scott Winant         | tt0118523 |
| 1746566018 | 1953 | 1952 | Paris Express                           | The Paris Express                       | French, Harold                 | Harold French        | tt0046034 |
| 1746513079 | 1910 | 1910 | Percy, the Cowboy                       | Percy the Cowboy                        |                                |                      | tt0348711 |
| 1746509251 | 1925 | 1925 | The Fighting Demon                      | The Fighting Demon                      |                                | Arthur Rosson        | tt0131392 |
| 1769970394 | 1966 | 1966 | The Sadistic Lover                      | The Sadistic Lover                      | Rosson, Arthur                 | George Gunter        | tt0257079 |
| 1746465422 | 1942 | 1942 | The Gay Sisters                         | The Gay Sisters                         | Gunter, George                 | Irving Rapper        | tt0034770 |
| 1746422509 | 1995 | 1995 | Things to Do in Denver When You're Dead | Things to Do in Denver When You're Dead | Rapper, Irving                 | Gary Fleder          | tt0114660 |
| 1745394898 | 2009 | 2009 | My Son, My Son, What Have Ye Done       | My Son, My Son, What Have Ye Done       | Fleder, Gary                   | Werner Herzog        | tt1233219 |
| 1746439464 | 1996 | 1996 | D3: The Mighty Ducks                    | D3: The Mighty Ducks                    | Herzog, Werner                 | Robert Lieberman     | tt0116000 |
| 1746585321 | 1930 | 1930 | Shadow of the Law                       | Shadow of the Law                       | Lieberman, Robert              | Louis J. Gasnier     | tt0021359 |
| 1746562253 | 1953 | 1953 | Louisiana Territory                     | Louisiana Territory                     | Gasnier, Louis                 | Harry W. Smith       | tt0230469 |
| 1746585465 | 1939 | 1939 | Mr. Moto in Danger Island               | Mr. Moto in Danger Island               | Smith, Harry W.                | Herbert I. Leeds     | tt0031677 |
| 1746482897 | 1917 | 1917 | The Moral Code                          | The Moral Code                          | Leeds, Herbert I.              | Ashley Miller        | tt0008315 |
| 1745272460 | 2000 | 2000 | Mission to Mars                         | Mission to Mars                         | Miller, Ashley                 | Brian De Palma       | tt0183523 |
| 1746533167 | 1915 | 1915 | The Gentleman from Indiana              | The Gentleman from Indiana              | De Palma, Brian                | Frank Lloyd          | tt0005377 |
| 1746423485 | 1996 | 1996 | The Funeral                             | The Funeral                             | Lloyd, Frank                   | Abel Ferrara         | tt0116378 |
| 1746258165 | 1975 | 1975 | The Hindenburg                          | The Hindenburg                          | Ferrara, Abel                  | Robert Wise          | tt0073113 |
| 1746569701 | 1953 | 1953 | Vigilante Terror                        | Vigilante Terror                        | Wise, Robert                   | Lewis D. Collins     | tt0046516 |
| 1746578441 | 1950 | 1950 | Women from Headquarters                 | Women from Headquarters                 | Collins, Lewis                 | George Blair         | tt0043144 |
| 1746508419 | 1923 | 1923 | Gold Madness                            | Gold Madness                            | Blair, George                  | Robert Thornby       | tt0014091 |
| 1746440019 | 1994 | 1994 | Nobody's Fool                           | Nobody's Fool                           | Thornby, Robert T.             | Robert Benton        | tt0110684 |
| 1746487480 | 1917 | 1917 | The Fair Barbarian                      | The Fair Barbarian                      | Benton, Robert                 | Robert Thornby       | tt0007926 |
| 1746211033 | 1973 | 1973 | Westworld                               | Westworld                               | Thornby, Robert                | Michael Crichton     | tt0070909 |
| 1746453595 | 1942 | 1942 | Atlantic Convoy                         | Atlantic Convoy                         | Crichton, Michael              | Lew Landers          | tt0034480 |
| 1746582462 | 1935 | 1935 | Two Fisted                              | Two Fisted                              | Landers, Lew                   | James Cruze          | tt0027148 |
| 1746423307 | 1995 | 1995 | The Scarlet Letter                      | The Scarlet Letter                      | Cruze, James                   | Roland Joffé         | tt0114345 |
| 1746583833 | 1931 | 1931 | Bad Company                             | Bad Company                             | Joffé, Roland                  | Tay Garnett          | tt0021634 |
| 1746583280 | 1929 | 1929 | The Harvest of Hate                     | The Harvest of Hate                     | Garnett, Tay                   | Henry MacRae         | tt0019966 |
| 1746554846 | 1964 | 1964 | Fate Is the Hunter                      | Fate Is the Hunter                      | MacRae, Henry                  | Ralph Nelson         | tt0058091 |
| 1746580705 | 1935 | 1935 | Society Fever                           | Society Fever                           | Nelson, Ralph                  | Frank R. Strayer     | tt0027021 |
| 1746570613 | 1952 | 1952 | My Man and I                            | My Man and I                            | Strayer, Frank                 | William A. Wellman   | tt0044938 |
| 1746504604 | 1918 | 1918 | String Beans                            | String Beans                            | Wellman, William A.            | Victor Schertzinger  | tt0009660 |
| 1745309311 | 2007 | 2007 | For the Bible Tells Me So               | For the Bible Tells Me So               | Schertzinger, Victor L.        | Daniel G. Karlslake  | tt0912583 |
| 1746503531 | 1919 | 1919 | The Joyous Liar                         | The Joyous Liar                         | Karlslake, Daniel              | Ernest C. Warde      | tt0190497 |
| 1746500664 | 1925 | 1925 | The Rainbow Trail                       | The Rainbow Trail                       | Warde, Ernest C.               | Lynn Reynolds        | tt0016259 |
| 1746562447 | 1957 | 1957 | Short Cut to Hell                       | Short Cut to Hell                       | Reynolds, Lynn                 | James Cagney         | tt0050964 |
| 1746491781 | 1948 | 1948 | Leather Gloves                          | Leather Gloves                          | Cagney, James                  | William Asher        | tt0040531 |
| 1746584935 | 1940 | 1940 | Mystery in Swing                        | Mystery in Swing                        | Quine, Richard; Asher, William | Arthur Dreifuss      | tt0032833 |
| 1746410188 | 1988 | 1988 | Thelonious Monk: Straight, No Chaser    | Thelonious Monk: Straight, No Chaser    | Dreifuss, Arthur               | Charlotte Zwerin     | tt0098465 |
| 1746582566 | 1934 | 1934 | Pursued                                 | Pursued                                 | Zwerin, Charlotte              | Louis King           | tt0025689 |
| 1746475968 | 1947 | 1947 | The Man I Love                          | The Man I Love                          | King, Louis                    | Raoul Walsh          | tt0038721 |
| 1746577746 | 1937 | 1936 | Charlie Chan at the Opera               | Charlie Chan at the Opera               | Walsh, Raoul                   | H. Bruce Humberstone | tt0027440 |
| 1746217855 | 1967 | 1966 | One-Eyed Soldiers                       | The One Eyed Soldiers                   | Humberstone, H. Bruce          | John Ainsworth       | tt0223839 |
| 1746575061 | 1937 | 1937 | Angel                                   | Angel                                   | Christophe, Jean               | Ernst Lubitsch       | tt0028575 |
| 1746420872 | 1991 | 1991 | Father of the Bride                     | Father of the Bride                     | Lubitsch, Ernst                | Charles Shyer        | tt0101862 |
| 1746439408 | 1943 | 1943 | Teen Age                                | Teen Age                                | Shyer, Charles                 | Richard L'Estrange   | tt0037356 |
| 1746392737 | 1981 | 1981 | History of the World: Part I            | History of the World: Part I            | L'Estrange, Dick               | Mel Brooks           | tt0082517 |
| 1746520889 | 1949 | 1948 | Incident                                | Incident                                | Brooks, Mel                    | William Beaudine     | tt0041508 |
| 1769976685 | 1979 | 1979 | Up from the Depths                      | Up from the Depths                      | Beaudine, William              | Charles B. Griffith  | tt0080066 |
| 1746496407 | 1919 | 1919 | The Man Who Turned White                | The Man Who Turned White                | Griffith, Charles B.           | Park Frame           | tt0010422 |

|            |      |      |                                             |                                             |                                       |                     |           |
|------------|------|------|---------------------------------------------|---------------------------------------------|---------------------------------------|---------------------|-----------|
| 1746566010 | 1953 | 1953 | Captain John Smith and Pocahontas           | Captain John Smith and Pocahontas           | Landers, Lew                          | Lew Landers         | tt0045603 |
| 1746584582 | 1931 | 1931 | Other Men's Women                           | Other Men's Women                           | Wellman, William A.                   | William A. Wellman  | tt0022236 |
| 1746569592 | 1954 | 1953 | Money from Home                             | Money from Home                             | Marshall, George                      | George Marshall     | tt0046087 |
| 1746453786 | 1942 | 1942 | This Above All                              | This Above All                              | Litvak, Anatole                       | Anatole Litvak      | tt0035431 |
| 1746483912 | 1918 | 1918 | The Count and the Wedding Guest             | The Count and the Wedding Guest             | Justice, Martin                       | Martin Justice      | tt0425919 |
| 1746563633 | 1952 | 1952 | Talk About a Stranger                       | Talk About a Stranger                       | Bradley, David                        | David Bradley       | tt0045216 |
| 1746573885 | 1958 | 1958 | Lafayette Escadrille                        | Lafayette Escadrille                        | Wellman, William A.                   | William A. Wellman  | tt0051840 |
| 1746520071 | 1926 | 1926 | Under Fire                                  | Under Fire                                  | Elfelt, Clifford S.                   | Clifford S. Elfelt  | tt0017496 |
| 1746560629 | 1932 | 1932 | Crooner                                     | Crooner                                     | Bacon, Lloyd                          | Lloyd Bacon         | tt0022789 |
| 1746574772 | 1935 | 1935 | The Lone Wolf Returns                       | The Lone Wolf Returns                       | Neill, Roy William                    | Roy William Neill   | tt0026646 |
| 1746475969 | 1946 | 1946 | Sing While You Dance                        | Sing While You Dance                        | Lederman, D. Ross                     | D. Ross Lederman    | tt0038943 |
| 1746453588 | 1942 | 1942 | Highways by Night                           | Highways by Night                           | Godfrey, Peter                        | Peter Godfrey       | tt0034853 |
| 1746571072 | 1935 | 1935 | Chasing Yesterday                           | Chasing Yesterday                           | Nicholls, George                      | George Nichols Jr.  | tt0026200 |
| 1746423559 | 1993 | 1993 | Demolition Man                              | Demolition Man                              | Brambilla, Marco                      | Marco Brambilla     | tt0106697 |
| 1745303169 | 2006 | 2006 | Just My Luck                                | Just My Luck                                | Petrie, Donald                        | Donald Petrie       | tt0397078 |
| 1746438208 | 1943 | 1943 | Flesh and Fantasy                           | Flesh and Fantasy                           | Duvivier, Julien                      | Julien Duvivier     | tt0035885 |
| 1746434901 | 1995 | 1995 | Before Sunrise                              | Before Sunrise                              | Linklater, Richard                    | Richard Linklater   | tt0112471 |
| 1746233021 | 1968 | 1968 | I Love You, Alice B. Toklas!                | I Love You, Alice B. Toklas!                | Averback, Hy                          | Hy Averback         | tt0063115 |
| 1746503819 | 1922 | 1922 | Always the Woman                            | Always the Woman                            | Rosson, Arthur                        | Arthur Rosson       | tt0012892 |
| 1746421000 | 1989 | 1989 | Split                                       | Split                                       | Shaw, Chris                           | Chris Shaw          | tt0098374 |
| 1746419918 | 1990 | 1990 | Funny About Love                            | Funny About Love                            | Nimoy, Leonard                        | Leonard Nimoy       | tt0099623 |
| 1746582648 | 1936 | 1936 | The Accusing Finger                         | The Accusing Finger                         | Hogan, James                          | James P. Hogan      | tt0027253 |
| 1746435905 | 1996 | 1996 | Primal Fear                                 | Primal Fear                                 | Hoblit, Gregory                       | Gregory Hoblit      | tt0117381 |
| 1746569574 | 1953 | 1953 | The Veils of Bagdad                         | The Veils of Bagdad                         | Sherman, George                       | George Sherman      | tt0046497 |
| 1746210173 | 1971 | 1971 | Dracula vs. Frankenstein                    | Dracula vs. Frankenstein                    | Adamson, Al                           | Al Adamson          | tt0067017 |
| 1746504127 | 1917 | 1917 | A Night in New Arabia                       | A Night in New Arabia                       | Mills, Thomas R.                      | Thomas R. Mills     | tt0181721 |
| 1746394758 | 1981 | 1981 | Modern Problems                             | Modern Problems                             | Shapiro, Ken                          | Ken Shapiro         | tt0082763 |
| 1746569951 | 1957 | 1957 | The Tall T                                  | The Tall T                                  | Boetticher, Budd                      | Budd Boetticher     | tt0051047 |
| 1746578510 | 1961 | 1961 | The Sand Castle                             | The Sand Castle                             | Hill, Jerome                          | Jerome Hill         | tt0055403 |
| 1746573955 | 1962 | 1961 | Sail a Crooked Ship                         | Sail a Crooked Ship                         | Brecher, Irving                       | Irving Brecher      | tt0055394 |
| 1746577645 | 1937 | 1937 | Don't Tell the Wife                         | Don't Tell the Wife                         | Cabanne, Christy                      | Christy Cabanne     | tt0028799 |
| 1746575071 | 1938 | 1938 | Sergeant Murphy                             | Sergeant Murphy                             | Eason, B. Reeves                      | B. Reeves Eason     | tt0030731 |
| 1746496415 | 1919 | 1919 | Who's Your Brother?                         | Who's Your Brother?                         | Adolfi, John G.                       | John G. Adolfi      | tt0010885 |
| 1746582218 | 1951 | 1951 | Secrets of Monte Carlo                      | Secrets of Monte Carlo                      | Blair, George                         | George Blair        | tt0044016 |
| 1746235078 | 1980 | 1980 | The Hunter                                  | The Hunter                                  | Kulik, Buzz                           | Buzz Kulik          | tt0080907 |
| 1746500148 | 1945 | 1945 | Senorita from the West                      | Senorita from the West                      | Strayer, Frank                        | Frank R. Strayer    | tt0038069 |
| 1746486323 | 1918 | 1918 | T'Other Dear Charmer                        | T'Other Dear Charmer                        | Earle, William P. S.                  | William P. S. Earle | tt0267008 |
| 1746465395 | 1941 | 1941 | Meet John Doe                               | Meet John Doe                               | Capra, Frank                          | Frank Capra         | tt0033891 |
| 1745374446 | 2008 | 2007 | Sex and Death 101                           | Sex and Death 101                           | Waters, Daniel                        | Daniel Waters       | tt0497972 |
| 1769969989 | 1912 | 1912 | Riley and Schultze                          | Riley and Schultze                          | Sennett, Mack                         | Mack Sennett        | tt0002462 |
| 1746577014 | 1959 | 1959 | Solomon and Sheba                           | Solomon and Sheba                           | Vidor, King                           | King Vidor          | tt0053290 |
| 1746565973 | 1954 | 1954 | Jubilee Trail                               | Jubilee Trail                               | Kane, Joseph Inman                    | Joseph Kane         | tt0047137 |
| 1746496513 | 1918 | 1918 | Staking His Life                            | Staking His Life                            |                                       |                     | tt0190033 |
| 1769974379 | 1916 | 1916 | When Seconds Count                          | When Seconds Count                          |                                       | J. Gunnis Davis     | tt1534566 |
| 1769974372 | 1916 | 1916 | A Life Chase                                | A Life Chase                                |                                       | Travers Vale        | tt0906039 |
| 1746532730 | 1915 | 1915 | Pretenses                                   | Pretenses                                   | Dillon, Jack                          | James Douglass      | tt0481957 |
| 1746502487 | 1915 | 1914 | Environment                                 | Environment                                 |                                       | Christy Cabanne     | tt0357637 |
| 1746409363 | 1988 | 1988 | U2: Rattle and Hum                          | U2: Rattle and Hum                          | Joanou, Phil                          | Phil Joanou         | tt0096328 |
| 1746393752 | 1984 | 1984 | The Good Fight: The Abraham Lincoln Brigade | The Good Fight: The Abraham Lincoln Brigade | Buckner, Noel; Dore, Mary; Sills, Sam | Noel Buckner        | tt0085610 |
| 1746219685 | 1974 | 1974 | Zardoz                                      | Zardoz                                      | Boorman, John                         | John Boorman        | tt0070948 |
| 1746581579 | 1951 | 1951 | Two of a Kind                               | Two of a Kind                               | Levin, Henry                          | Henry Levin         | tt0044159 |
| 1746475960 | 1948 | 1948 | Assigned to Danger                          | Assigned to Danger                          | Boetticher, Oscar                     | Budd Boetticher     | tt0040119 |
| 1746474440 | 1947 | 1947 | King of the Wild Horses                     | King of the Wild Horses                     | Archainbaud, George                   | George Archainbaud  | tt0039534 |
| 1746500019 | 1945 | 1945 | Rough Ridin' Justice                        | Rough Ridin' Justice                        | Abrahams, Derwin                      | Derwin Abrahams     | tt0236697 |
| 1746524573 | 1928 | 1928 | Jesus of Nazareth                           | Jesus of Nazareth                           |                                       | Jean Conover        | tt0330487 |
| 1746582294 | 1928 | 1928 | Brand of Courage                            | The Brand of Courage                        | Mitchell, Bruce                       | Bruce Mitchell      | tt0301064 |
| 1746500501 | 1925 | 1925 | The Lost Chord                              | The Lost Cord                               | Noy, Wilfred                          | Richard Smith       | tt0347438 |

|            |      |      |                                      |                                     |                                   |                        |           |
|------------|------|------|--------------------------------------|-------------------------------------|-----------------------------------|------------------------|-----------|
| 1746473665 | 1942 | 1942 | Jungle Siren                         | Jungle Siren                        | Newfield, Sam                     | Sam Newfield           | tt0034929 |
| 1746439148 | 1941 | 1941 | The Singing Hill                     | The Singing Hills                   | Landers, Lew                      | Josef Berne            | tt0385234 |
| 1746580706 | 1937 | 1937 | Night Must Fall                      | Night Must Fall                     | Thorpe, Richard                   | Richard Thorpe         | tt0029310 |
| 1746561901 | 1954 | 1954 | The Snow Creature                    | The Snow Creature                   | Wilder, W. Lee                    | W. Lee Wilder          | tt0047507 |
| 1746562241 | 1953 | 1953 | Mahatma Gandhi: 20th Century Prophet | Mahatma Gandhi 20th Century Prophet |                                   | Stanley Neal           | tt0352551 |
| 1746198422 | 1968 | 1968 | The Golden Breed                     | The Golden Breed                    | Davis, Dale                       | Dale Davis             | tt1165283 |
| 1746574259 | 1963 | 1963 | Rampage                              | Rampage                             | Karlson, Phil                     | Phil Karlson           | tt0057447 |
| 1746574724 | 1935 | 1935 | The Right to Live                    | The Right to Live                   | Keighley, William                 | William Keighley       | tt0026934 |
| 1746574193 | 1962 | 1962 | The Underwater City                  | The Underwater City                 | McDonald, Frank                   | Frank McDonald         | tt0056637 |
| 1746509509 | 1925 | 1925 | A Lover's Oath                       | A Lover's Oath                      | Earle, Ferdinand P.               | Ferdinand P. Earle     | tt0013339 |
| 1746565936 | 1957 | 1957 | Boy on a Dolphin                     | Boy on a Dolphin                    | Negulesco, Jean                   | Jean Negulesco         | tt0050208 |
| 1746576167 | 1931 | 1931 | This Modern Age                      | This Modern Age                     | Grindé, Nicholas                  | Nick Grinde            | tt0022478 |
| 1746567442 | 1933 | 1933 | The Flaming Signal                   | The Flaming Signal                  | Jeske, George; Roberts, C. Edward | George Jeske           | tt0024019 |
| 1746419370 | 1981 | 1981 | The Howling                          | The Howling                         | Dante, Joe                        | Joe Dante              | tt0082533 |
| 1746583946 | 1930 | 1930 | Canyon Hawks                         | Canyon Hawks                        | Neitz, Alvin J.                   | Alan James             | tt0020736 |
| 1746572112 | 1932 | 1932 | Veiled Aristocrats                   | Veiled Aristocrats                  | Micheaux, Oscar                   | Oscar Micheaux         | tt0023655 |
| 1746571285 | 1934 | 1934 | A Girl of the Limberlost             | A Girl of the Limberlost            | Cabanne, Christy                  | Christy Cabanne        | tt0025178 |
| 1746566819 | 1933 | 1933 | Broken Dreams                        | Broken Dreams                       | Vignola, Robert                   | Robert G. Vignola      | tt0023849 |
| 1746533175 | 1928 | 1928 | A Midnight Adventure                 | The Midnight Adventure              | Worne, Duke                       | Duke Worne             | tt0019161 |
| 1746492205 | 1947 | 1947 | Blind Spot                           | Blind Spot                          | Gordon, Robert                    | Robert Gordon          | tt0039197 |
| 1746198747 | 1967 | 1967 | Fitzwilly                            | Fitzwilly                           | Mann, Delbert                     | Delbert Mann           | tt0061669 |
| 1746583701 | 1931 | 1931 | Friends and Lovers                   | Friends and Lovers                  | Schertzing, Victor                | Victor Schertzing      | tt0021889 |
| 1746532414 | 1927 | 1927 | Winners of the Wilderness            | Winners of the Wilderness           | Van Dyke, W. S.                   | W.S. Van Dyke          | tt0018579 |
| 1746500103 | 1923 | 1923 | The Covered Wagon                    | The Covered Wagon                   | Cruze, James                      | James Cruze            | tt0013951 |
| 1746578606 | 1960 | 1960 | The Beatniks                         | The Beatniks                        | Frees, Paul                       | Paul Frees             | tt0053640 |
| 1746580570 | 1938 | 1938 | Tropic Holiday                       | Tropic Holiday                      | Reed, Theodore                    | Theodore Reed          | tt0030897 |
| 1746578496 | 1958 | 1958 | Teenage Monster                      | Teenage Monster                     | Marquette, Jacques                | Jacques R. Marquette   | tt0051063 |
| 1746583630 | 1928 | 1928 | The Mating Call                      | The Mating Call                     | Cruze, James                      | James Cruze            | tt0019152 |
| 1746501133 | 1910 | 1910 | The Sea Wolves                       | The Sea Wolves                      | Balshofer, Fred J.                | Fred J. Balshofer      | tt0257113 |
| 1746577721 | 1933 | 1933 | The Secret of Madame Blanche         | The Secret of Madame Blanche        | Brabin, Charles                   | Charles Brabin         | tt0024537 |
| 1746235288 | 1981 | 1981 | Absence of Malice                    | Absence of Malice                   | Pollack, Sydney                   | Sydney Pollack         | tt0081974 |
| 1746583299 | 1931 | 1931 | The Sin of Madelon Claudet           | The Sin of Madelon Claudet          | Selwyn, Edgar                     | Edgar Selwyn           | tt0022386 |
| 1746218667 | 1972 | 1971 | ZAAT                                 | Zaat                                | Barton, Don                       | Don Barton             | tt0072666 |
| 1746453585 | 1943 | 1942 | Yankee Doodle Dandy                  | Yankee Doodle Dandy                 | Curtiz, Michael                   | Michael Curtiz         | tt0035575 |
| 1746514330 | 1910 | 1910 | An Unselfish Love                    | An Unselfish Love                   | Dawley, J. Searle                 | J. Searle Dawley       | tt0759945 |
| 1746583067 | 1935 | 1935 | The Best Man Wins                    | The Best Man Wins                   | Kenton, Erle C.                   | Erle C. Kenton         | tt0026108 |
| 1746423478 | 1996 | 1996 | The Stupids                          | The Stupids                         | Landis, John                      | John Landis            | tt0117768 |
| 1745302835 | 2006 | 2006 | Date Movie                           | Date Movie                          | Seltzer, Aaron                    | Aaron Seltzer          | tt0466342 |
| 1746566166 | 1958 | 1958 | The Decks Ran Red                    | The Decks Ran Red                   | Stone, Andrew L.                  | Andrew L. Stone        | tt0051524 |
| 1746491768 | 1945 | 1944 | Music for Millions                   | Music for Millions                  | Koster, Henry                     | Henry Koster           | tt0037104 |
| 1746585075 | 1930 | 1930 | The Right to Love                    | The Right to Love                   | Wallace, Richard                  | Richard Wallace        | tt0021301 |
| 1746484151 | 1918 | 1918 | Secret Strings                       | Secret Strings                      | Ince, John                        | John Ince              | tt0009594 |
| 1746465409 | 1947 | 1947 | Rustlers of Devil's Canyon           | Rustlers of Devil's Canyon          | Springsteen, R. G.                | R.G. Springsteen       | tt0039791 |
| 1746583492 | 1950 | 1950 | Highway 301                          | Highway 301                         | Stone, Andrew                     | Andrew L. Stone        | tt0042250 |
| 1746438512 | 1997 | 1997 | Kiss the Girls                       | Kiss the Girls                      | Fleder, Gary                      | Gary Fleder            | tt0119468 |
| 1746504786 | 1922 | 1922 | The Better Man Wins                  | The Better Man Wins                 | Perez, Marcel                     | Frank S. Mattison      | tt0012933 |
| 1746580983 | 1950 | 1950 | Rocky Mountain                       | Rocky Mountain                      | Keighley, William                 | William Keighley       | tt0042899 |
| 1746569760 | 1958 | 1958 | Hot Spell                            | Hot Spell                           | Mann, Daniel                      | Daniel Mann            | tt0051742 |
| 1745374188 | 2002 | 2002 | Ash Wednesday                        | Ash Wednesday                       | Burns, Edward                     | Edward Burns           | tt0280438 |
| 1746578444 | 1963 | 1963 | Shock Corridor                       | Shock Corridor                      | Fuller, Samuel                    | Samuel Fuller          | tt0057495 |
| 1746581399 | 1961 | 1961 | Living Venus                         | Living Venus                        | Lewis, Herschell Gordon           | Herschell Gordon Lewis | tt0054035 |
| 1746578497 | 1962 | 1962 | Escape from Zahrain                  | Escape from Zahrain                 | Neame, Ronald                     | Ronald Neame           | tt0055963 |
| 1746438207 | 1942 | 1942 | The Man with Two Lives               | Man with Two Lives                  | Rosen, Phil                       | Phil Rosen             | tt0035031 |
| 1746503788 | 1921 | 1921 | Nobody's Fool                        | Nobody's Fool                       | Baggot, King                      | King Baggot            | tt0012507 |
| 1746514944 | 1923 | 1923 | Bright Lights of Broadway            | Bright Lights of Broadway           | Campbell, Webster                 | Webster Campbell       | tt0013891 |
| 1746577514 | 1935 | 1935 | To Beat the Band                     | To Beat the Band                    | Stoloff, Ben                      | Benjamin Stoloff       | tt0027115 |
| 1746513679 | 1910 | 1910 | The Paleface Princess                | The Paleface Princess               |                                   | William F. Haddock     | tt2239160 |

|            |      |      |                                |                                |                                  |                        |           |
|------------|------|------|--------------------------------|--------------------------------|----------------------------------|------------------------|-----------|
| 1746507764 | 1926 | 1926 | Deuce High                     | Deuce High                     | Thorpe, Richard                  | Richard Thorpe         | tt0016780 |
| 1746574481 | 1934 | 1934 | Chained                        | Chained                        | Brown, Clarence                  | Clarence Brown         | tt0024963 |
| 1769969879 | 1912 | 1912 | Two Women                      | Two Women                      |                                  |                        | tt0385303 |
| 1746584027 | 1935 | 1935 | The Nut Farm                   | The Nut Farm                   | Brown, Melville                  | Melville W. Brown      | tt0026797 |
| 1746582458 | 1938 | 1938 | Blond Cheat                    | Blond Cheat                    | Santley, Joseph                  | Joseph Santley         | tt0029925 |
| 1746570728 | 1933 | 1933 | Drum Taps                      | Drum Taps                      | McGowan, J. P.                   | J.P. McGowan           | tt0023967 |
| 1746568023 | 1933 | 1933 | One Year Later                 | One Year Later                 | Hopper, E. Mason                 | E. Mason Hopper        | tt0024416 |
| 1746554872 | 1955 | 1954 | Black Tuesday                  | Black Tuesday                  | Fregonese, Hugo                  | Hugo Fregonese         | tt0046790 |
| 1746569703 | 1956 | 1956 | On the Threshold of Space      | On the Threshold of Space      | Webb, Robert D.                  | Robert D. Webb         | tt0049571 |
| 1746554555 | 1965 | 1965 | Strange Bedfellows             | Strange Bedfellows             | Frank, Melvin                    | Melvin Frank           | tt0058621 |
| 1746524712 | 1917 | 1917 | The Girl and the Crisis        | The Girl and the Crisis        | Mong, William V.                 | William V. Mong        | tt0008005 |
| 1746524593 | 1910 | 1910 | When We Were in Our Teens      | When We Were in Our Teens      | Powell, Frank                    | Frank Powell           | tt0001454 |
| 1746530694 | 1949 | 1949 | Oh, You Beautiful Doll         | Oh, You Beautiful Doll         | Stahl, John M.                   | John M. Stahl          | tt0041712 |
| 1745374804 | 2008 | 2007 | Cthulhu                        | Cthulhu                        | Gildark, Dan                     | Dan Gildark            | tt0478126 |
| 1746571873 | 1910 | 1910 | The Fire Chief's Daughter      | The Fire Chief's Daughter      |                                  | Francis Boggs          | tt0221176 |
| 1746504086 | 1919 | 1919 | A Man of Honor                 | A Man of Honor                 | Balshofer, Fred J.               | Fred J. Balshofer      | tt0010427 |
| 1746582789 | 1937 | 1937 | Public Cowboy No. 1            | Public Cowboy No. 1            | Kane, Joe                        | Joseph Kane            | tt0029445 |
| 1746584703 | 1929 | 1929 | Captain Cowboy                 | Captain Cowboy                 | McGowan, J. P.                   | J.P. McGowan           | tt0019747 |
| 1746454456 | 1942 | 1942 | House of Errors                | House of Errors                | Ray, Bernard B.                  | Bernard B. Ray         | tt0034871 |
| 1746584872 | 1939 | 1939 | Hidden Power                   | Hidden Power                   | Collins, Lewis D.                | Lewis D. Collins       | tt0031423 |
| 1746500346 | 1926 | 1926 | Beyond the Trail               | Beyond the Trail               | Herman, Al                       | Albert Herman          | tt0016648 |
| 1746492082 | 1946 | 1946 | Inside Job                     | Inside Job                     | Yarbrough, Jean                  | Jean Yarbrough         | tt0038643 |
| 1746234349 | 1968 | 1968 | Killers Three                  | Killers Three                  | Kessler, Bruce                   | Bruce Kessler          | tt0063184 |
| 1746465046 | 1947 | 1947 | Buffalo Bill Rides Again       | Buffalo Bill Rides Again       | Ray, Bernard B.                  | Bernard B. Ray         | tt0039227 |
| 1746507587 | 1949 | 1949 | The Kid from Cleveland         | The Kid from Cleveland         | Kline, Herbert                   | Herbert Kline          | tt0041545 |
| 1746524159 | 1915 | 1915 | Alias Jimmy Valentine          | Alias Jimmy Valentine          | Tourneur, Maurice                | Maurice Tourneur       | tt0004872 |
| 1746584096 | 1938 | 1938 | Smashing the Rackets           | Smashing the Rackets           | Landers, Lew                     | Lew Landers            | tt0030765 |
| 1746233979 | 1967 | 1967 | Portrait of Jason              | Portrait of Jason              | Clarke, Shirley                  | Shirley Clarke         | tt0062144 |
| 1746574549 | 1936 | 1936 | Valiant Is the Word for Carrie | Valiant Is the Word for Carrie | Ruggles, Wesley                  | Wesley Ruggles         | tt0028455 |
| 1746577043 | 1959 | 1959 | Rio Bravo                      | Rio Bravo                      | Hawks, Howard                    | Howard Hawks           | tt0053221 |
| 1746569902 | 1957 | 1957 | Ride a Violent Mile            | Ride a Violent Mile            | Warren, Charles Marquis          | Charles Marquis Warren | tt0050901 |
| 1746503577 | 1922 | 1922 | Oh! Mabel Behave!              | Oh, Mabel Behave               | Sennett, Mack; Sterling, Ford    | Mack Sennett           | tt0013448 |
| 1746500886 | 1916 | 1916 | The Dawn of Love               | The Dawn of Love               | Carewe, Edwin                    | Edwin Carewe           | tt0006572 |
| 1746562339 | 1956 | 1956 | The Mole People                | The Mole People                | Vogel, Virgil                    | Virgil W. Vogel        | tt0049516 |
| 1746585101 | 1928 | 1928 | The Clean-Up Man               | The Clean Up Man               | Taylor, Ray                      | Ray Taylor             | tt0018776 |
| 1746219391 | 1973 | 1973 | The Last of Sheila             | The Last of Sheila             | Ross, Herbert                    | Herbert Ross           | tt0070291 |
| 1746408427 | 1990 | 1989 | Fun Down There                 | Fun Down There                 | Stigliano, Roger                 | Roger Stigliano        | tt0095187 |
| 1746584737 | 1928 | 1928 | The Blue Danube                | The Blue Danube                | Sloane, Paul                     | Paul Sloane            | tt0018711 |
| 1746486480 | 1920 | 1920 | Dangerous Love                 | Dangerous Love                 | Bartlett, Charles E.             | Charles Bartlett       | tt0150268 |
| 1746454381 | 1943 | 1942 | The Pride of the Yankees       | The Pride of the Yankees       | Wood, Sam                        | Sam Wood               | tt0035211 |
| 1745374139 | 2002 | 2001 | Knockaround Guys               | Knockaround Guys               | Levien, David ; Koppelman, Brian | Brian Koppelman        | tt0211465 |
| 1746573881 | 1958 | 1958 | Handle with Care               | Handle with Care               | Friedkin, David                  | David Friedkin         | tt0051697 |
| 1746408467 | 1987 | 1987 | RoboCop                        | RoboCop                        | Verhoeven, Paul                  | Paul Verhoeven         | tt0093870 |
| 1746423313 | 1990 | 1990 | Misery                         | Misery                         | Reiner, Rob                      | Rob Reiner             | tt0100157 |
| 1746583965 | 1935 | 1935 | Mary Burns, Fugitive           | Mary Burns, Fugitive           | Howard, William K.               | William K. Howard      | tt0026688 |
| 1746487912 | 1919 | 1919 | The Right to Lie               | The Right to Lie               | Carewe, Edwin                    | Edwin Carewe           | tt0011628 |
| 1746235240 | 1973 | 1973 | Papillon                       | Papillon                       | Schaffner, Franklin J.           | Franklin J. Schaffner  | tt0070511 |
| 1746210740 | 1972 | 1972 | Avanti!                        | Avanti!                        | Wilder, Billy                    | Billy Wilder           | tt0068240 |
| 1746525024 | 1920 | 1920 | The Jungle Princess            | The Jungle Princess            | Martin, E. A.                    | E.A. Martin            | tt0195853 |
| 1746564135 | 1953 | 1953 | Bandits of Corsica             | Bandits of Corsica             | Nazarro, Ray                     | Ray Nazarro            | tt0045539 |
| 1746436230 | 1990 | 1989 | For All Mankind                | For All Mankind                | Reinert, Al                      | Al Reinert             | tt0097372 |
| 1746436638 | 1943 | 1943 | Dead Men Walk                  | Dead Men Walk                  | Newfield, Sam                    | Sam Newfield           | tt0035784 |
| 1746508043 | 1926 | 1926 | The Mile-a-Minute Man          | The Mile a Minute Man          | Nelson, Jack                     | Jack Nelson            | tt0017150 |
| 1746410361 | 1990 | 1990 | The Freshman                   | The Freshman                   | Bergman, Andrew                  | Andrew Bergman         | tt0099615 |
| 1746571141 | 1935 | 1935 | Anna Karénina                  | Anna Karenina                  | Brown, Clarence                  | Clarence Brown         | tt0026071 |
| 1746409372 | 1990 | 1990 | Total Recall                   | Total Recall                   | Verhoeven, Paul                  | Paul Verhoeven         | tt0100802 |
| 1746582486 | 1938 | 1938 | Straight Place and Show        | Straight Place and Show        | Butler, David                    | David Butler           | tt0030802 |

|            |      |      |                            |                            |                      |                        |           |
|------------|------|------|----------------------------|----------------------------|----------------------|------------------------|-----------|
| 1746562144 | 1954 | 1954 | The White Orchid           | The White Orchid           | Le Borg, Reginald    | Reginald Le Borg       | tt0047675 |
| 1746533169 | 1916 | 1916 | The Dead Alive             | The Dead Alive             | Vernot, Henry J.     | Henry J. Vernot        | tt0157514 |
| 1769969499 | 1911 | 1911 | Niagara Falls Celebration  | Niagara Falls Celebration  |                      |                        | tt1282450 |
| 1746584498 | 1931 | 1931 | Scandal Sheet              | Scandal Sheet              | Cromwell, John       | John Cromwell          | tt0022343 |
| 1746582580 | 1936 | 1936 | Easy to Take               | Easy to Take               | Tryon, Glenn         | Glenn Tryon            | tt0027565 |
| 1746553786 | 1964 | 1964 | Emil and the Detectives    | Emil and the Detectives    | Tewksbury, Peter     | Peter Tewksbury        | tt0058056 |
| 1745341750 | 2002 | 2002 | Panic Room                 | Panic Room                 | Fincher, David       | David Fincher          | tt0258000 |
| 1746235927 | 1976 | 1975 | The Wild Party             | The Wild Party             | Ivory, James         | James Ivory            | tt0073903 |
| 1746474532 | 1948 | 1948 | The Hunted                 | The Hunted                 | Bernhard, Jack       | Jack Bernhard          | tt0040455 |
| 1746583291 | 1930 | 1930 | A Daughter of the Congo    | A Daughter of the Congo    | Micheaux, Oscar      | Oscar Micheaux         | tt0020813 |
| 1746494197 | 1910 | 1910 | The Love of Lady Irma      | The Love of Lady Irma      | Powell, Frank        | Frank Powell           | tt0361854 |
| 1746504077 | 1920 | 1920 | The Penalty                | The Penalty                | Worsley, Wallace     | Wallace Worsley        | tt0011565 |
| 1746524940 | 1914 | 1914 | The Lure                   | The Lure                   |                      | Alice Guy              | tt0004275 |
| 1746439717 | 1999 | 1999 | The Cider House Rules      | The Cider House Rules      | Hallström, Lasse     | Lasse Hallström        | tt0124315 |
| 1746420801 | 1997 | 1997 | The Locusts                | The Locusts                | Kelley, John Patrick | John Patrick Kelley    | tt0119557 |
| 1745374798 | 2010 | 2010 | Due Date                   | Due Date                   | Phillips, Todd       | Todd Phillips          | tt1231583 |
| 1746433567 | 1992 | 1992 | The Playboys               | The Playboys               | MacKinnon, Gillies   | Gillies MacKinnon      | tt0105150 |
| 1746464917 | 1941 | 1941 | Outlaws of the Panhandle   | Outlaws of the Panhandle   | Nelson, Sam          | Sam Nelson             | tt0033990 |
| 1746569752 | 1955 | 1955 | Chicago Syndicate          | Chicago Syndicate          | Sears, Fred F.       | Fred F. Sears          | tt0047934 |
| 1746584412 | 1939 | 1939 | These Glamour Girls        | These Glamour Girls        | Simon, S. Sylvan     | S. Sylvan Simon        | tt0032018 |
| 1746501341 | 1915 | 1915 | The Fight                  | The Fight                  | Lederer, George W.   | George W. Lederer      | tt0005322 |
| 1746570154 | 1933 | 1933 | The Bowery                 | The Bowery                 | Walsh, Raoul         | Raoul Walsh            | tt0023838 |
| 1746250967 | 1977 | 1977 | 3 Women                    | 3 Women                    | Altman, Robert       | Robert Altman          | tt0075612 |
| 1746436332 | 1943 | 1943 | China                      | China                      | Farrow, John         | John Farrow            | tt0035735 |
| 1746577098 | 1961 | 1961 | The Fiend of Dope Island   | The Fiend of Dope Island   | Watt, Nate           | Nate Watt              | tt0194879 |
| 1746507847 | 1948 | 1948 | The Westward Trail         | The Westward Trail         | Taylor, Ray          | Ray Taylor             | tt0040957 |
| 1746465159 | 1942 | 1942 | Sabotage Squad             | Sabotage Squad             | Landers, Lew         | Lew Landers            | tt0035277 |
| 1746208180 | 1967 | 1967 | ****                       | ****                       | Warhol, Andy         | Andy Warhol            | tt0179184 |
| 1746514085 | 1928 | 1928 | The Little Wild Girl       | The Little Wild Girl       | Mattison, Frank S.   | Frank S. Mattison      | tt0019106 |
| 1746573673 | 1932 | 1932 | State's Attorney           | State's Attorney           | Archainbaud, George  | George Archainbaud     | tt0023507 |
| 1746497263 | 1922 | 1922 | The Man She Brought Back   | The Man She Brought Back   | Miller, Charles      | Charles Miller         | tt0013357 |
| 1745340773 | 2001 | 2001 | K-Pax                      | K PAX                      | Softley, Iain        | Iain Softley           | tt0272152 |
| 1745358065 | 2010 | 2010 | Inception                  | Inception                  | Nolan, Christopher   | Christopher Nolan      | tt1375666 |
| 1745372699 | 2003 | 2003 | The Big Empty              | The Big Empty              | Anderson, Steve      | Steve Anderson         | tt0321442 |
| 1746487308 | 1919 | 1919 | Muggsy                     | Muggsy                     | MacDonald, Sherwood  | Sherwood MacDonald     | tt0191296 |
| 1746543071 | 1914 | 1914 | Home, Sweet Home           | Home, Sweet Home           | Griffith, D. W.      | D.W. Griffith          | tt0003167 |
| 1746555411 | 1955 | 1955 | Apache Woman               | Apache Woman               | Corman, Roger        | Roger Corman           | tt0047837 |
| 1746474467 | 1947 | 1947 | My Favorite Brunette       | My Favorite Brunette       | Nugent, Elliott      | Elliott Nugent         | tt0039645 |
| 1746550303 | 1954 | 1954 | Racing Blood               | Racing Blood               | Barry, Wesley        | Wesley Barry           | tt0047386 |
| 1746497002 | 1922 | 1922 | Trail's End                | Trail's End                | Ford, Francis        | Francis Ford           | tt0013703 |
| 1746584718 | 1929 | 1929 | In the Headlines           | In the Headlines           | Adolfi, John G.      | John G. Adolfi         | tt0020021 |
| 1746584708 | 1929 | 1929 | Side Street                | Side Street                | St. Clair, Malcolm   | Malcolm St. Clair      | tt0020404 |
| 1746561255 | 1932 | 1932 | The Unwritten Law          | The Unwritten Law          | Cabanne, Christy     | Christy Cabanne        | tt0023644 |
| 1745373159 | 2003 | 2003 | The Life of David Gale     | The Life of David Gale     | Parker, Alan         | Alan Parker            | tt0289992 |
| 1746467981 | 1917 | 1917 | A Marked Man               | A Marked Man               | Ford, Jack           | John Ford              | tt0008271 |
| 1746564504 | 1952 | 1952 | Hurricane Smith            | Hurricane Smith            | Hopper, Jerry        | Jerry Hopper           | tt0044729 |
| 1746584014 | 1939 | 1939 | Paris Honeymoon            | Paris Honeymoon            | Tuttle, Frank        | Frank Tuttle           | tt0031787 |
| 1746502656 | 1916 | 1916 | Susan Rocks the Boat       | Susan Rocks the Boat       | Powell, Paul         | Paul Powell            | tt0007414 |
| 1746507874 | 1923 | 1923 | If Winter Comes            | If Winter Comes            | Millarde, Harry      | Harry F. Millarde      | tt0014147 |
| 1746408906 | 1990 | 1990 | Men Don't Leave            | Men Don't Leave            | Brickman, Paul       | Paul Brickman          | tt0100134 |
| 1746234738 | 1972 | 1972 | The Last House on the Left | The Last House on the Left | Craven, Wes          | Wes Craven             | tt0068833 |
| 1746497913 | 1921 | 1921 | Princess Jones             | Princess Jones             | Seyffertitz, G. V.   | Gustav von Seyffertitz | tt0012590 |
| 1746524393 | 1923 | 1923 | The Ten Commandments       | The Ten Commandments       | De Mille, Cecil B.   | Cecil B. DeMille       | tt0014532 |
| 1746583059 | 1937 | 1937 | One Mile from Heaven       | One Mile from Heaven       | Dwan, Allan          | Allan Dwan             | tt0029349 |
| 1746574033 | 1960 | 1961 | Five Minutes to Live       | Five Minutes to Live       | Karn, Bill           | Bill Karn              | tt0054817 |
| 1746577382 | 1951 | 1951 | Chain of Circumstance      | Chain of Circumstance      | Jason, Will          | Will Jason             | tt0043396 |
| 1746248751 | 1974 | 1973 | Superdad                   | Superdad                   | McEveety, Vincent    | Vincent McEveety       | tt0072229 |



|            |      |      |                                          |                                          |                                          |                       |           |
|------------|------|------|------------------------------------------|------------------------------------------|------------------------------------------|-----------------------|-----------|
| 1746487329 | 1921 | 1921 | Remorseless Love                         | Remorseless Love                         | Ince, Ralph                              | Ralph Ince            | tt0012617 |
| 1745322643 | 2007 | 2007 | Pirates of the Caribbean: At World's End | Pirates of the Caribbean: At World's End | Verbinski, Gore                          | Gore Verbinski        | tt0449088 |
| 1745309509 | 2006 | 2006 | Art School Confidential                  | Art School Confidential                  | Zwigoff, Terry                           | Terry Zwigoff         | tt0364955 |
| 1746422041 | 1992 | 1992 | Hoffa                                    | Hoffa                                    | DeVito, Danny                            | Danny DeVito          | tt0104427 |
| 1746574867 | 1935 | 1935 | Mark of the Vampire                      | Mark of the Vampire                      | Browning, Tod                            | Tod Browning          | tt0026685 |
| 1745293355 | 2007 | 2007 | Descent                                  | Descent                                  | Lugacy, Talia                            | Talia Lugacy          | tt0463027 |
| 1746497587 | 1920 | 1920 | The Key to Power                         | The Key to Power                         | Parke, William                           | William Parke         | tt0009254 |
| 1746453601 | 1941 | 1941 | The Feminine Touch                       | The Feminine Touch                       | Van Dyke, W. S.                          | W.S. Van Dyke         | tt0033596 |
| 1746495731 | 1919 | 1919 | The Feud                                 | The Feud                                 | Le Saint, Edward                         | Edward LeSaint        | tt0010117 |
| 1746503231 | 1922 | 1923 | The Right That Failed                    | The Light That Failed                    | Veiller, Bayard                          | George Melford        | tt0014198 |
| 1746435019 | 1998 | 1998 | Pleasantville                            | Pleasantville                            | Ross, Gary                               | Gary Ross             | tt0120789 |
| 1746508743 | 1925 | 1925 | Gold and Grit                            | Gold and Grit                            | Thorpe, Richard                          | Richard Thorpe        | tt0015865 |
| 1746394650 | 1990 | 1990 | Henry & June                             | Henry & June                             | Kaufman, Philip                          | Philip Kaufman        | tt0099762 |
| 1746582509 | 1935 | 1935 | Texas Jack                               | Texas Jack                               | Ray, B. B.                               | Bernard B. Ray        | tt0027085 |
| 1746584433 | 1931 | 1931 | The Exile                                | The Exile                                | Micheaux, Oscar                          | Oscar Micheaux        | tt0021844 |
| 1746520900 | 1949 | 1949 | Thieves' Highway                         | Thieves' Highway                         | Dassin, Jules                            | Jules Dassin          | tt0041958 |
| 1746492462 | 1948 | 1948 | Let's Live Again                         | Let's Live Again                         | Leeds, Herbert I.                        | Herbert I. Leeds      | tt0174866 |
| 1746584206 | 1939 | 1939 | You Can't Get Away with Murder           | You Can't Get Away with Murder           | Seiler, Lewis                            | Lewis Seiler          | tt0032153 |
| 1746577572 | 1935 | 1935 | Devil's Canyon                           | Devil's Canyon                           |                                          | Clifford Smith        | tt0238160 |
| 1746577922 | 1936 | 1936 | Early to Bed                             | Early to Bed                             | McLeod, Norman                           | Norman Z. McLeod      | tt0027561 |
| 1746394153 | 1986 | 1986 | Jumpin' Jack Flash                       | Jumpin' Jack Flash                       | Marshall, Penny                          | Penny Marshall        | tt0091306 |
| 1746394208 | 1984 | 1983 | Seeing Red                               | Seeing Red                               | Reichert, Julia; Klein, James            | Jim Klein             | tt0086273 |
| 1746235461 | 1971 | 1971 | The Last Picture Show                    | The Last Picture Show                    | Bogdanovich, Peter                       | Peter Bogdanovich     | tt0067328 |
| 1746497530 | 1918 | 1918 | The Ranger                               | The Ranger                               | Gray, Bob                                | Robert Gray           | tt0009534 |
| 1746234956 | 1965 | 1965 | When the Boys Meet the Girls             | When the Boys Meet the Girls             | Ganzer, Alvin                            | Alvin Ganzer          | tt0059904 |
| 1746580242 | 1935 | 1935 | Star of Midnight                         | Star of Midnight                         | Roberts, Stephen                         | Stephen Roberts       | tt0027040 |
| 1745340003 | 2004 | 2004 | Surviving Christmas                      | Surviving Christmas                      | Mitchell, Mike                           | Mike Mitchell         | tt0252028 |
| 1746504135 | 1918 | 1917 | The Gulf Between                         | The Gulf Between                         | Physioc, Wray                            | Wray Bartlett Physioc | tt0009136 |
| 1746514499 | 1915 | 1915 | On Her Wedding Night                     | On Her Wedding Night                     | Humphrey, William                        | George D. Baker       | tt0005828 |
| 1746554240 | 1963 | 1963 | The Stripper                             | The Stripper                             | Schaffner, Franklin J.                   | Franklin J. Schaffner | tt0057537 |
| 1745282624 | 2007 | 2007 | It Is Fine! Everything Is Fine           | It Is Fine! Everything Is Fine.          | Glover, Crispin Hellion; Brothers, David | David Brothers        | tt0795405 |
| 1746524983 | 1923 | 1923 | Thundergate                              | Thundergate                              | De Grasse, Joseph                        | Joseph De Grasse      | tt0014544 |
| 1746208878 | 1968 | 1968 | Madigan                                  | Madigan                                  | Siegel, Donald                           | Don Siegel            | tt0063256 |
| 1746436351 | 1941 | 1940 | The Bride Wore Crutches                  | The Bride Wore Crutches                  | Traube, Shepard                          | Shepard Traube        | tt0032279 |
| 1746492591 | 1945 | 1945 | A Guy, a Gal, and a Pal                  | A Guy, a Gal and a Pal                   | Boetticher, Oscar                        | Budd Boetticher       | tt0037759 |
| 1746454052 | 1943 | 1943 | Shantytown                               | Shantytown                               | Santley, Joseph                          | Joseph Santley        | tt0036344 |
| 1746523347 | 1923 | 1923 | The Scarlet Lily                         | The Scarlet Lily                         | Schertzinger, Victor                     | Victor Schertzinger   | tt0014442 |
| 1746509186 | 1926 | 1926 | Old Loves and New                        | Old Loves and New                        | Tourneur, Maurice                        | Maurice Tourneur      | tt0017227 |
| 1746516344 | 1921 | 1921 | Jim the Penman                           | Jim the Penman                           | Webb, Kenneth                            | Kenneth S. Webb       | tt0012333 |
| 1746577770 | 1938 | 1938 | Rascals                                  | Rascals                                  | Humberstone, H. Bruce                    | H. Bruce Humberstone  | tt0030654 |
| 1746235766 | 1977 | 1977 | The Hills Have Eyes                      | The Hills Have Eyes                      | Craven, Wes                              | Wes Craven            | tt0077681 |
| 1746219026 | 1974 | 1974 | The Godfather Part II                    | The Godfather: Part II                   | Coppola, Francis Ford                    | Francis Ford Coppola  | tt0071562 |
| 1746514575 | 1916 | 1916 | Unto Those Who Sin                       | Unto Those Who Sin                       | Daly, William Robert                     | William Robert Daly   | tt0159081 |
| 1746436886 | 1994 | 1994 | Princess Caraboo                         | Princess Caraboo                         | Austin, Michael                          | Michael Austin        | tt0110892 |
| 1746420882 | 1990 | 1990 | Mr. & Mrs. Bridge                        | Mr. & Mrs. Bridge                        | Ivory, James                             | James Ivory           | tt0100200 |
| 1746555378 | 1955 | 1955 | Trial                                    | Trial                                    | Robson, Mark                             | Mark Robson           | tt0048748 |
| 1746524799 | 1914 | 1914 | The Patchwork Girl of Oz                 | The Patchwork Girl of Oz                 | MacDonald, J. Farrell                    | J. Farrell MacDonald  | tt0004457 |
| 1746555185 | 1957 | 1957 | Operation Mad Ball                       | Operation Mad Ball                       | Quine, Richard                           | Richard Quine         | tt0050805 |
| 1746577048 | 1963 | 1963 | Bunny Yeager's Nude Camera               | Bunny Yeager's Nude Camera               | Mahon, Barry                             | Barry Mahon           | tt0057906 |
| 1746503940 | 1918 | 1917 | The Lesson                               | The Lesson                               | Giblyn, Charles                          | Charles Giblyn        | tt0009288 |
| 1746530769 | 1949 | 1949 | Riders of the Whistling Pines            | Riders of the Whistling Pines            | English, John                            | John English          | tt0041809 |
| 1746567078 | 1932 | 1932 | Fast Life                                | Fast Life                                | Pollard, Harry                           | Harry A. Pollard      | tt0022882 |
| 1746454402 | 1945 | 1945 | Rough, Tough and Ready                   | Rough, Tough and Ready                   | Lord, Del                                | Del Lord              | tt0038037 |
| 1746583377 | 1950 | 1950 | Saddle Tramp                             | Saddle Tramp                             | Fregonese, Hugo                          | Hugo Fregonese        | tt0042915 |
| 1746574203 | 1960 | 1960 | The Magnificent Seven                    | The Magnificent Seven                    | Sturges, John                            | John Sturges          | tt0054047 |
| 1746455257 | 1999 | 1999 | Blue Streak                              | Blue Streak                              | Mayfield, Les                            | Les Mayfield          | tt0181316 |
| 1746465225 | 1947 | 1947 | Love and Learn                           | Love and Learn                           | Cordova, Frederick de                    | Frederick De Cordova  | tt0039585 |

|            |      |      |                                 |                                 |                            |                         |           |
|------------|------|------|---------------------------------|---------------------------------|----------------------------|-------------------------|-----------|
| 1746198769 | 1969 | 1969 | Blue Movie                      | Blue Movie                      | Warhol, Andy               | Andy Warhol             | tt0062745 |
| 1745394877 | 2010 | 2010 | Furry Vengeance                 | Furry Vengeance                 | Kumble, Roger              | Roger Kumble            | tt0492389 |
| 1769970687 | 1968 | 1968 | Indecent Desires                | Indecent Desires                | Silverman, Louis           | Doris Wishman           | tt0061561 |
| 1746560558 | 1932 | 1932 | Business and Pleasure           | Business and Pleasure           | Butler, David; Taylor, Sam | David Butler            | tt0021702 |
| 1746503568 | 1921 | 1921 | Forbidden Love                  | Forbidden Love                  | Van Loan, Philip           | Philip Van Loan         | tt0212169 |
| 1746585396 | 1940 | 1940 | Grandpa Goes to Town            | Grandpa Goes to Town            | Meins, Gus                 | Gus Meins               | tt0032547 |
| 1746455959 | 1997 | 1997 | That Darn Cat                   | That Darn Cat                   | Spiers, Bob                | Bob Spiers              | tt0120317 |
| 1746465073 | 1945 | 1945 | Radio Stars on Parade           | Radio Stars on Parade           | Goodwins, Leslie           | Leslie Goodwins         | tt0038012 |
| 1746580450 | 1935 | 1935 | Whispering Smith Speaks         | Whispering Smith Speaks         | Howard, David              | David Howard            | tt0027206 |
| 1746421291 | 1994 | 1994 | Exit to Eden                    | Exit to Eden                    | Marshall, Garry            | Garry Marshall          | tt0109758 |
| 1746500422 | 1925 | 1925 | New Brooms                      | New Brooms                      | de Mille, William          | William C. de Mille     | tt0016151 |
| 1746474496 | 1944 | 1944 | Shadows in the Night            | Shadows in the Night            | Forde, Eugene J.           | Eugene Forde            | tt0037266 |
| 1746566303 | 1957 | 1957 | Edge of the City                | Edge of the City                | Ritt, Martin               | Martin Ritt             | tt0050347 |
| 1746568344 | 1933 | 1933 | After Tonight                   | After Tonight                   | Archainbaud, George        | George Archainbaud      | tt0023742 |
| 1746566347 | 1958 | 1958 | The Left Handed Gun             | The Left Handed Gun             | Penn, Arthur               | Arthur Penn             | tt0051849 |
| 1769970571 | 1966 | 1966 | Assignment--Female              | Assignment: Female              | Phelan, Raymond A.         | Raymond Phelan          | tt0210549 |
| 1746503904 | 1921 | 1921 | Go Get Him                      | Go Get Him                      |                            | Phil Goldstone          | tt0359336 |
| 1746410576 | 1987 | 1987 | Suspect                         | Suspect                         | Yates, Peter               | Peter Yates             | tt0094082 |
| 1746524143 | 1923 | 1923 | Desire                          | Desire                          | Lee, Rowland V.            | Rowland V. Lee          | tt0013985 |
| 1746578607 | 1962 | 1962 | The Reluctant Saint             | The Reluctant Saint             | Dmytryk, Edward            | Edward Dmytryk          | tt0056403 |
| 1746217413 | 1967 | 1967 | Camelot                         | Camelot                         | Logan, Joshua              | Joshua Logan            | tt0061439 |
| 1746564318 | 1953 | 1953 | Count the Hours                 | Count the Hours!                | Siegel, Don                | Don Siegel              | tt0045652 |
| 1745342017 | 2002 | 2001 | Frailty                         | Frailty                         | Paxton, Bill               | Bill Paxton             | tt0264616 |
| 1746504762 | 1921 | 1921 | The Hole in the Wall            | Hole in the Wall                | Karger, Maxwell            | Maxwell Karger          | tt0012288 |
| 1746424062 | 1941 | 1941 | Mr. District Attorney           | Mr. District Attorney           | Morgan, William            | William Morgan          | tt0033923 |
| 1746408456 | 1989 | 1989 | Three Fugitives                 | Three Fugitives                 | Veber, Francis             | Francis Veber           | tt0098471 |
| 1746520843 | 1950 | 1949 | Love Happy                      | Love Happy                      | Miller, David              | David Miller            | tt0041604 |
| 1746576981 | 1951 | 1951 | Savage Drums                    | Savage Drums                    | Berke, William             | William Berke           | tt0043996 |
| 1746199209 | 1969 | 1969 | De Sade                         | De Sade                         | Endfield, Cy               | Cy Endfield             | tt0064212 |
| 1746198224 | 1969 | 1969 | Hell's Belles                   | Hell's Belles                   | Dexter, Maury              | Maury Dexter            | tt0063058 |
| 1746520033 | 1924 | 1924 | The Western Wallop              | The Western Wallop              | Smith, Clifford            | Clifford Smith          | tt0015481 |
| 1746566985 | 1934 | 1934 | The Old Fashioned Way           | The Old Fashioned Way           | Beaudine, William          | William Beaudine        | tt0025590 |
| 1746562320 | 1956 | 1956 | The Vagabond King               | The Vagabond King               | Curtiz, Michael            | Michael Curtiz          | tt0049909 |
| 1746574512 | 1935 | 1935 | The Headline Woman              | The Headline Woman              | Nigh, William              | William Nigh            | tt0026458 |
| 1746454820 | 1941 | 1941 | Tight Shoes                     | Tight Shoes                     | Rogell, Albert S.          | Albert S. Rogell        | tt0034293 |
| 1746566160 | 1955 | 1955 | The Second Greatest Sex         | The Second Greatest Sex         | Marshall, George           | George Marshall         | tt0048594 |
| 1746554412 | 1963 | 1963 | The Courtship of Eddie's Father | The Courtship of Eddie's Father | Minnelli, Vincente         | Vincente Minnelli       | tt0056956 |
| 1746582721 | 1936 | 1936 | Nobody's Fool                   | Nobody's Fool                   | Collins, Arthur Greville   | Arthur Greville Collins | tt0028037 |
| 1746574468 | 1934 | 1934 | Music in the Air                | Music in the Air                | May, Joe                   | Joe May                 | tt0025536 |
| 1769977881 | 1988 | 1988 | Above the Law                   | Above the Law                   | Davis, Andrew              | Andrew Davis            | tt0094602 |
| 1746492223 | 1945 | 1945 | Springtime in Texas             | Springtime in Texas             | Drake, Oliver              | Oliver Drake            | tt0163278 |
| 1746394759 | 1993 | 1993 | Alive                           | Alive                           | Marshall, Frank            | Frank Marshall          | tt0106246 |
| 1745293303 | 2006 | 2006 | Inside Man                      | Inside Man                      | Lee, Spike                 | Spike Lee               | tt0454848 |
| 1746454830 | 1941 | 1941 | Footlight Fever                 | Footlight Fever                 | Reis, Irving               | Irving Reis             | tt0033615 |
| 1746394540 | 1984 | 1984 | Footloose                       | Footloose                       | Ross, Herbert              | Herbert Ross            | tt0087277 |
| 1746533203 | 1915 | 1915 | Shadows from the Past           | Shadows from the Past           | Ridgely, Richard J.        | Richard Ridgely         | tt0006029 |
| 1746571496 | 1931 | 1931 | Arizona                         | Arizona                         | Seitz, George B.           | George B. Seitz         | tt0022134 |
| 1745393726 | 2009 | 2009 | Whip It                         | Whip It                         | Barrymore, Drew            | Drew Barrymore          | tt1172233 |
| 1746438961 | 1940 | 1940 | Triple Justice                  | Triple Justice                  | Howard, David              | David Howard            | tt0033185 |
| 1746464867 | 1944 | 1944 | South of Dixie                  | South of Dixie                  | Yarbrough, Jean            | Jean Yarbrough          | tt0037302 |
| 1746500453 | 1926 | 1926 | The Auction Block               | The Auction Block               | Henley, Hobart             | Hobart Henley           | tt0016616 |
| 1746512918 | 1916 | 1916 | Miss Petticoats                 | Miss Petticoats                 | Knoles, Harley             | Harley Knoles           | tt0007079 |
| 1746567590 | 1932 | 1932 | Handle with Care                | Handle with Care                | Butler, David              | David Butler            | tt0022974 |
| 1746475539 | 1946 | 1946 | The Devil's Mask                | The Devil's Mask                | Levin, Henry               | Henry Levin             | tt0038471 |
| 1746232951 | 1966 | 1966 | Weekend of Fear                 | Weekend of Fear                 | Danford, Joe               | Joe Danford             | tt0229034 |
| 1746504182 | 1922 | 1923 | The Sleepwalker                 | The Sleepwalker                 | Le Saint, Edward           | Gilbert Pratt           | tt0783815 |
| 1746503958 | 1919 | 1919 | Rough Riding Romance            | Rough Riding Romance            | Rosson, Arthur             | Arthur Rosson           | tt0010645 |

|                   |             |             |                                    |                                    |                                  |                      |                  |
|-------------------|-------------|-------------|------------------------------------|------------------------------------|----------------------------------|----------------------|------------------|
| 1746496814        | 1919        | 1919        | Miss Arizona                       | Miss Arizona                       | Thayer, Otis B.                  | Otis Thayer          | tt0010471        |
| 1746573924        | 1958        | 1958        | The Space Children                 | The Space Children                 | Arnold, Jack                     | Jack Arnold          | tt0052227        |
| 1746554096        | 1964        | 1964        | Where Love Has Gone                | Where Love Has Gone                | Dmytryk, Edward                  | Edward Dmytryk       | tt0058745        |
| 1746584637        | 1930        | 1930        | Common Clay                        | Common Clay                        | Fleming, Victor                  | Victor Fleming       | tt0020781        |
| 1746508192        | 1924        | 1924        | The Law Demands                    | The Law Demands                    | Hoyt, Harry O.                   | Harry O. Hoyt        | tt0015055        |
| 1746582382        | 1950        | 1950        | To Please a Lady                   | To Please a Lady                   | Brown, Clarence                  | Clarence Brown       | tt0043052        |
| 1746577019        | 1951        | 1951        | Whirlwind                          | Whirlwind                          | English, John                    | John English         | tt0044210        |
| 1746584484        | 1930        | 1930        | Playing Around                     | Playing Around                     | LeRoy, Mervyn                    | Mervyn LeRoy         | tt0021263        |
| 1746533229        | 1916        | 1916        | Dimples                            | Dimples                            | Jones, Edgar                     | Edgar Jones          | tt0006594        |
| 1745359851        | 2001        | 2001        | Out Cold                           | Out Cold                           | Malloy, Emmett ; Malloy, Brendan | Brendan Malloy       | tt0253798        |
| 1746577562        | 1936        | 1936        | Dancing Pirate                     | Dancing Pirate                     | Corrigan, Lloyd                  | Lloyd Corrigan       | tt0027496        |
| 1746198424        | 1969        | 1969        | Gathering of Evil                  | Gathering of Evil                  | Bertini, Victor                  | Victor Bertini       | tt0219006        |
| 1746509503        | 1924        | 1924        | Restless Wives                     | Restless Wives                     | La Cava, Gregory                 | Gregory La Cava      | tt0015271        |
| 1746582693        | 1937        | 1937        | Woman in Distress                  | Woman in Distress                  | Shores, Lynn                     | Lynn Shores          | tt0029792        |
| 1746520266        | 1926        | 1926        | A Woman's Heart                    | A Woman's Heart                    | Rosen, Phil                      | Phil Rosen           | tt0017576        |
| 1746574482        | 1933        | 1933        | Her Secret                         | Her Secret                         | Millais, Warren                  | Warren Millais       | tt0024113        |
| 1746571137        | 1933        | 1933        | Skyway                             | Skyway                             | Collins, Lew                     | Lewis D. Collins     | tt0024573        |
| 1746577344        | 1960        | 1960        | Who Was That Lady?                 | Who Was That Lady?                 | Sidney, George                   | George Sidney        | tt0054473        |
| 1746566328        | 1955        | 1955        | The Big Knife                      | The Big Knife                      | Aldrich, Robert                  | Robert Aldrich       | tt0047880        |
| 1746563887        | 1953        | 1953        | Big Leaguer                        | Big Leaguer                        | Aldrich, Robert                  | Robert Aldrich       | tt0045556        |
| 1746516071        | 1921        | 1921        | Ducks and Drakes                   | Ducks and Drakes                   | Campbell, Maurice                | Maurice Campbell     | tt0012125        |
| 1746410196        | 1984        | 1984        | The Flamingo Kid                   | The Flamingo Kid                   | Marshall, Garry                  | Garry Marshall       | tt0087265        |
| 1746218088        | 1967        | 1967        | The Adventures of Bullwhip Griffin | The Adventures of Bullwhip Griffin | Neilson, James                   | James Neilson        | tt0061333        |
| 1746570316        | 1933        | 1933        | Circle Canyon                      | Circle Canyon                      | Adamson, Victor                  | Victor Adamson       | tt0132039        |
| 1746583859        | 1931        | 1931        | Man from Death Valley              | The Man from Death Valley          | Nosler, Lloyd                    | Lloyd Nosler         | tt0022116        |
| 1746578595        | 1961        | 1961        | On the Double                      | On the Double                      | Shavelson, Melville              | Melville Shavelson   | tt0055253        |
| 1746504621        | 1922        | 1922        | Blue Blazes                        | Blue Blazes                        | Kelly, Robert; Mack, Charles W.  | Robert Kelly         | tt0012953        |
| 1769976193        | 1921        | 1922        | Holding His Own                    | Holding His Own                    | Fahrney, Milton                  | Milton J. Fahrney    | tt5547700        |
| 1746577558        | 1935        | 1935        | Carnival                           | Carnival                           | Lang, Walter                     | Walter Lang          | tt0026181        |
| 1746218187        | 1966        | 1966        | The Black Cat                      | The Black Cat                      | Hoffman, Harold                  | Harold Hoffman       | tt0060171        |
| 1746409280        | 1984        | 1984        | Broadway Danny Rose                | Broadway Danny Rose                | Allen, Woody                     | Woody Allen          | tt0087003        |
| 1746208346        | 1969        | 1969        | The Monitors                       | The Monitors                       | Shea, Jack                       | Jack Shea            | tt0064684        |
| 1746499912        | 1945        | 1945        | The Man Who Walked Alone           | The Man Who Walked Alone           | Cabanne, Christy                 | Christy Cabanne      | tt0037893        |
| 1746393524        | 1988        | 1988        | Mac and Me                         | Mac and Me                         | Raffill, Stewart                 | Stewart Raffill      | tt0095560        |
| 1746575033        | 1934        | 1934        | Strange Wives                      | Strange Wives                      | Thorpe, Richard                  | Richard Thorpe       | tt0027051        |
| 1746566319        | 1958        | 1958        | A Certain Smile                    | A Certain Smile                    | Negulesco, Jean                  | Jean Negulesco       | tt0051466        |
| 1746493426        | 1910        | 1910        | One Night, and Then ---            | One Night, and Then                | Griffith, D. W.                  | D.W. Griffith        | tt0001346        |
| 1746419170        | 1994        | 1994        | The Client                         | The Client                         | Schumacher, Joel                 | Joel Schumacher      | tt0109446        |
| 1746561998        | 1954        | 1953        | Rob Roy the Highland Rogue         | Rob Roy: The Highland Rogue        | French, Harold                   | Harold French        | tt0046246        |
| 1746524221        | 1915        | 1915        | The Goose Girl                     | The Goose Girl                     | Thomson, Frederick               | Frederick A. Thomson | tt0005405        |
| 1746578754        | 1962        | 1961        | Swingin' Along                     | Swingin' Along                     | Barton, Charles                  | Charles Barton       | tt0056543        |
| 1746219543        | 1972        | 1972        | Prime Cut                          | Prime Cut                          | Ritchie, Michael                 | Michael Ritchie      | tt0069121        |
| 1746421626        | 1991        | 1991        | Curly Sue                          | Curly Sue                          | Hughes, John                     | John Hughes          | tt0101635        |
| 1746501064        | 1914        | 1914        | The Greyhound                      | The Greyhound                      | McGill, Lawrence                 | Lawrence B. McGill   | tt0004043        |
| 1746584022        | 1935        | 1935        | Tombstone Terror                   | Tombstone Terror                   | Bradbury, Robert N.              | Robert N. Bradbury   | tt0027120        |
| 1746438949        | 1941        | 1941        | Silver Stallion                    | Silver Stallion                    | Finney, Edward                   | Edward Finney        | tt0034189        |
| 1746569572        | 1957        | 1957        | Man in the Shadow                  | Man in the Shadow                  | Arnold, Jack                     | Jack Arnold          | tt0050680        |
| 1746583629        | 1930        | 1930        | The Dawn Trail                     | The Dawn Trail                     | Cabanne, Christy                 | Christy Cabanne      | tt0020816        |
| 1746410007        | 1992        | 1992        | The Hand That Rocks the Cradle     | The Hand That Rocks the Cradle     | Hanson, Curtis                   | Curtis Hanson        | tt0104389        |
| 1746420743        | 1991        | 1991        | Eve of Destruction                 | Eve of Destruction                 | Gibbins, Duncan                  | Duncan Gibbins       | tt0101831        |
| 1746583891        | 1931        | 1931        | Smart Money                        | Smart Money                        | Green, Alfred E.                 | Alfred E. Green      | tt0022403        |
| 1746582409        | 1936        | 1936        | Murder with Pictures               | Murder with Pictures               | Barton, Charles                  | Charles Barton       | tt0028004        |
| 1746581865        | 1929        | 1929        | The Amazing Vagabond               | The Amazing Vagabond               | Fox, Wallace W.                  | Wallace Fox          | tt0019636        |
| 1746500331        | 1926        | 1925        | Hidden Loot                        | Hidden Loot                        | Bradbury, Robert North           | Robert N. Bradbury   | tt0015910        |
| 1746409932        | 1986        | 1986        | Half Moon Street                   | Half Moon Street                   | Swaim, Bob                       | Bob Swaim            | tt0091164        |
| <b>1746454023</b> | <b>1941</b> | <b>1941</b> | <b>Hellzapoppin'</b>               | <b>Hellzapoppin'</b>               | <b>Potter, H. C.</b>             | <b>H.C. Potter</b>   | <b>tt0033704</b> |
| 1746514541        | 1914        | 1914        | What's His Name                    | What's His Name                    | DeMille, Cecil B.                | Cecil B. DeMille     | tt0004792        |

|            |      |      |                                     |                                     |                                    |                      |           |
|------------|------|------|-------------------------------------|-------------------------------------|------------------------------------|----------------------|-----------|
| 1746508677 | 1926 | 1926 | Brown of Harvard                    | Brown of Harvard                    | Conway, Jack                       | Jack Conway          | tt0016690 |
| 1746491822 | 1948 | 1948 | Mary Lou                            | Mary Lou                            | Dreifuss, Arthur                   | Arthur Dreifuss      | tt0039613 |
| 1746574427 | 1962 | 1962 | The Music Man                       | The Music Man                       | DaCosta, Morton                    | Morton DaCosta       | tt0056262 |
| 1746583170 | 1934 | 1934 | Ladies Should Listen                | Ladies Should Listen                | Tuttle, Frank                      | Frank Tuttle         | tt0025363 |
| 1746503038 | 1910 | 1910 | A Quiet Boarding House              | A Quiet Boarding House              |                                    | Tom Ricketts         | tt1644501 |
| 1746582064 | 1930 | 1930 | Personality                         | Personality                         | Heerman, Victor                    | Victor Heerman       | tt0021245 |
| 1746570006 | 1959 | 1959 | The Sound and the Fury              | The Sound and the Fury              | Ritt, Martin                       | Martin Ritt          | tt0053298 |
| 1746520591 | 1925 | 1925 | Desert Madness                      | Desert Madness                      | Webb, Harry                        | Harry S. Webb        | tt0298831 |
| 1746503487 | 1918 | 1918 | The Brazen Beauty                   | The Brazen Beauty                   | Browning, Tod                      | Tod Browning         | tt0009963 |
| 1746532654 | 1915 | 1915 | Greater Love Hath No Man            | Greater Love Hath No Man            | Blaché, Herbert                    | Herbert Blaché       | tt0005423 |
| 1746580944 | 1960 | 1960 | High Time                           | High Time                           | Edwards, Blake                     | Blake Edwards        | tt0053912 |
| 1746503391 | 1918 | 1918 | The Life Mask                       | The Life Mask                       | Crane, Frank                       | Frank Hall Crane     | tt0009297 |
| 1746409298 | 1984 | 1984 | Iceman                              | Iceman                              | Schepisi, Fred                     | Fred Schepisi        | tt0087452 |
| 1746498665 | 1917 | 1917 | Raffles, the Amateur Cracksman      | Raffles, the Amateur Cracksman      | Irving, George                     | George Irving        | tt0008489 |
| 1746199014 | 1969 | 1969 | More Dead Than Alive                | More Dead Than Alive                | Sparr, Robert                      | Robert Sparr         | tt0064695 |
| 1746555090 | 1957 | 1957 | Last of the Bad Men                 | Last of the Badmen                  | Landres, Paul                      | Paul Landres         | tt0050625 |
| 1746496270 | 1919 | 1919 | Modern Husbands                     | Modern Husbands                     | Grandon, Francis J.                | Francis J. Grandon   | tt0010473 |
| 1746503522 | 1921 | 1921 | Cheated Love                        | Cheated Love                        | Baggot, King                       | King Baggot          | tt0012040 |
| 1746393998 | 1982 | 1981 | One from the Heart                  | One from the Heart                  | Coppola, Francis                   | Francis Ford Coppola | tt0084445 |
| 1746577831 | 1935 | 1935 | Hot off the Press                   | Hot Off the Press                   | Herman, Al                         | Albert Herman        | tt0026495 |
| 1746487903 | 1917 | 1917 | Sunny Jane                          | Sunny Jane                          |                                    | Sherwood MacDonald   | tt0008641 |
| 1746568219 | 1932 | 1932 | Strangers in Love                   | Strangers in Love                   | Mendes, Lothar                     | Lothar Mendes        | tt0023527 |
| 1746582749 | 1937 | 1937 | Come On, Cowboys!                   | Come on, Cowboys                    | Kane, Joseph                       | Joseph Kane          | tt0028732 |
| 1746520989 | 1949 | 1949 | Gun Runner                          | Gun Runner                          | Hillyer, Lambert                   | Lambert Hillyer      | tt0041440 |
| 1746465129 | 1942 | 1942 | Across the Pacific                  | Across the Pacific                  | Huston, John; Sherman, Vincent     | John Huston          | tt0034428 |
| 1746578814 | 1961 | 1961 | The Happy Thieves                   | The Happy Thieves                   | Marshall, George                   | George Marshall      | tt0056057 |
| 1746513725 | 1915 | 1915 | The Man from Oregon                 | The Man from Oregon                 | Barker, Reginald                   | Reginald Barker      | tt0005702 |
| 1746585124 | 1929 | 1928 | Red Hot Speed                       | Red Hot Speed                       | Henabery, Joseph E.                | Joseph Henabery      | tt0020316 |
| 1746235340 | 1974 | 1974 | Freebie and the Bean                | Freebie and the Bean                | Rush, Richard                      | Richard Rush         | tt0071521 |
| 1746508912 | 1925 | 1925 | Ship of Souls                       | Ship of Souls                       | Miller, Charles                    | Charles Miller       | tt0016343 |
| 1746562272 | 1953 | 1953 | Marry Me Again                      | Marry Me Again                      | Tashlin, Frank                     | Frank Tashlin        | tt0046048 |
| 1745359690 | 2004 | 2004 | Ray                                 | Troy                                | Hackford, Taylor                   | Wolfgang Petersen    | tt032452  |
| 1746520255 | 1924 | 1924 | Ridin' West                         | Ridin' West                         | Webb, Harry                        | Harry S. Webb        | tt0299113 |
| 1746555513 | 1955 | 1955 | The Court-Martial of Billy Mitchell | The Court Martial of Billy Mitchell | Preminger, Otto                    | Otto Preminger       | tt0047956 |
| 1746573784 | 1958 | 1958 | The Law and Jake Wade               | The Law and Jake Wade               | Sturges, John                      | John Sturges         | tt0051848 |
| 1745302498 | 2005 | 2005 | House of Wax                        | House of Wax                        | Collet-Serra, Jaume                | Jaume Collet         | tt0397065 |
| 1746499985 | 1948 | 1948 | A Southern Yankee                   | A Southern Yankee                   | Sedgwick, Edward; Simon, S. Sylvan | Edward Sedgwick      | tt0040825 |
| 1746474506 | 1944 | 1944 | Beautiful But Broke                 | Beautiful But Broke                 | Barton, Charles                    | Charles Barton       | tt0036633 |
| 1746394218 | 1988 | 1988 | Scrooged                            | Scrooged                            | Donner, Richard                    | Richard Donner       | tt0096061 |
| 1746577461 | 1961 | 1960 | The Sinister Urge                   | The Sinister Urge                   | Wood, Edward Davis                 | Edward D. Wood Jr.   | tt0055452 |
| 1746487139 | 1919 | 1919 | The Unbroken Promise                | The Unbroken Promise                | Powell, Frank                      | Frank Powell         | tt0194486 |
| 1746491826 | 1947 | 1947 | Framed                              | Framed                              | Wallace, Richard                   | Richard Wallace      | tt0039396 |
| 1769971952 | 1969 | 1968 | Desire Under the Palms              | Desire Under the Palms              | Sarno, Joseph W.                   | Joseph W. Sarno      | tt0062876 |
| 1745293991 | 2007 | 2007 | National Treasure: Book of Secrets  | National Treasure: Book of Secrets  | Turteltaub, Jon                    | Jon Turteltaub       | tt0465234 |
| 1746453825 | 1944 | 1944 | Voice in the Wind                   | Voice in the Wind                   | Ripley, Arthur                     | Arthur Ripley        | tt0037438 |
| 1746454186 | 1996 | 1996 | Sleepers                            | Sleepers                            | Levinson, Barry                    | Barry Levinson       | tt0117665 |
| 1746524876 | 1928 | 1928 | Must We Marry?                      | Must We Marry?                      | Mattison, Frank S.                 | Frank S. Mattison    | tt0019190 |
| 1746497651 | 1921 | 1921 | The Butterfly Girl                  | The Butterfly Girl                  | Gorman, John                       | John Gorman          | tt0012018 |
| 1746515827 | 1920 | 1920 | Dollar for Dollar                   | Dollar for Dollar                   | Keenan, Frank                      | Frank Keenan         | tt0150365 |
| 1746534804 | 1921 | 1921 | Bare Knuckles                       | Bare Knuckles                       | Hogan, James P.                    | James P. Hogan       | tt0011945 |
| 1746584549 | 1928 | 1928 | The Avenging Shadow                 | The Avenging Shadow                 | Taylor, Ray                        | Ray Taylor           | tt0018664 |
| 1745374739 | 2008 | 2008 | One Missed Call                     | One Missed Call                     | Valette, Eric                      | Eric Valette         | tt0479968 |
| 1746573797 | 1959 | 1959 | Blood and Steel                     | Blood and Steel                     | Kowalski, Bernard L.               | Bernard L. Kowalski  | tt0052636 |
| 1745359710 | 2002 | 2002 | The Master of Disguise              | The Master of Disguise              | Blake, Perry Andelin               | Perry Andelin Blake  | tt0295427 |
| 1745357928 | 2002 | 2002 | John Q.                             | John Q.                             | Cassavetes, Nick                   | Nick Cassavetes      | tt0251160 |
| 1746208316 | 1968 | 1968 | The Secret War of Harry Frigg       | The Secret War of Harry Frigg       | Smight, Jack                       | Jack Smight          | tt0063573 |
| 1746473916 | 1946 | 1946 | The Runaround                       | The Runaround                       | Lamont, Charles                    | Charles Lamont       | tt0038894 |

|            |      |      |                                     |                                     |                                  |                         |           |
|------------|------|------|-------------------------------------|-------------------------------------|----------------------------------|-------------------------|-----------|
| 1746584209 | 1935 | 1935 | She Couldn't Take It                | She Couldn't Take It                | Garnett, Tay                     | Tay Garnett             | tt0026984 |
| 1746584910 | 1939 | 1939 | The Phantom Stage                   | The Phantom Stage                   | Wagner, George                   | George Wagner           | tt0031797 |
| 1746508716 | 1924 | 1924 | The Tomboy                          | The Tomboy                          | Kirkland, David                  | David Kirkland          | tt0015419 |
| 1769971919 | 1969 | 1969 | Sex Family Robinson on the Farm     | Sex Family Robinson on the Farm     | Vair, Linda                      | Linda Vair              | tt0257142 |
| 1746454257 | 1941 | 1941 | Blonde Inspiration                  | Blonde Inspiration                  | Berkeley, Busby                  | Busby Berkeley          | tt0033400 |
| 1746439481 | 1945 | 1945 | Beyond the Pecos                    | Beyond the Pecos                    | Hillyer, Lambert                 | Lambert Hillyer         | tt0169607 |
| 1746584793 | 1930 | 1930 | The Big Party                       | The Big Party                       | Blystone, John                   | John G. Blystone        | tt0020689 |
| 1746491789 | 1945 | 1945 | Arson Squad                         | Arson Squad                         | Landers, Lew                     | Lew Landers             | tt0037521 |
| 1746487054 | 1921 | 1921 | The Barricade                       | The Barricade                       | Cabanne, William Christy         | Christy Cabanne         | tt0011946 |
| 1746492093 | 1946 | 1946 | Cluny Brown                         | Cluny Brown                         | Lubitsch, Ernst                  | Ernst Lubitsch          | tt0038419 |
| 1746424583 | 1941 | 1941 | Ellery Queen and the Perfect Crime  | Ellery Queen and the Perfect Crime  | Hogan, James                     | James P. Hogan          | tt0033573 |
| 1746465087 | 1942 | 1942 | West of the Law                     | West of the Law                     | Bretherton, Howard P.            | Howard Bretherton       | tt0035543 |
| 1746532497 | 1922 | 1922 | Broad Daylight                      | Broad Daylight                      | Cummings, Irving                 | Irving Cummings         | tt0012976 |
| 1746474542 | 1948 | 1948 | Easter Parade                       | Easter Parade                       | Walters, Charles                 | Charles Walters         | tt0040308 |
| 1746577034 | 1961 | 1961 | The Guns of Navarone                | The Guns of Navarone                | Thompson, J. Lee                 | J. Lee Thompson         | tt0054953 |
| 1769970432 | 1965 | 1964 | The Thrill Killer                   | The Thrill Killers                  |                                  | Ray Dennis Steckler     | tt0058653 |
| 1746583372 | 1950 | 1950 | With These Hands                    | With These Hands                    | Arnold, Jack                     | Jack Arnold             | tt0043138 |
| 1746582706 | 1938 | 1938 | Gone Harlem                         | Gone Harlem                         |                                  | Irwin Franklyn          | tt0174701 |
| 1746434335 | 1999 | 1999 | At First Sight                      | At First Sight                      | Winkler, Irwin                   | Irwin Winkler           | tt0132512 |
| 1746434615 | 1992 | 1992 | Swoon                               | Swoon                               | Kalin, Tom                       | Tom Kalin               | tt0105508 |
| 1746492438 | 1945 | 1945 | Frontier Feud                       | Frontier Feud                       | Hillyer, Lambert                 | Lambert Hillyer         | tt0037719 |
| 1746487334 | 1920 | 1920 | The Discarded Woman                 | The Discarded Woman                 | King, Burton L.                  | Burton L. King          | tt0193881 |
| 1746421714 | 1999 | 1998 | God Said Ha!                        | God Said, 'Ha!'                     | Sweeney, Julia                   | Julia Sweeney           | tt0119207 |
| 1746567599 | 1933 | 1933 | Broadway to Hollywood               | Broadway to Hollywood               | Mack, Willard                    | Willard Mack            | tt0023848 |
| 1746566067 | 1957 | 1957 | Pal Joey                            | Pal Joey                            | Sidney, George                   | George Sidney           | tt0050815 |
| 1746583591 | 1951 | 1951 | Yellow Fin                          | Yellow Fin                          | McDonald, Frank                  | Frank McDonald          | tt0044221 |
| 1745339880 | 2004 | 2004 | De-Lovely                           | De-Lovely                           | Winkler, Irwin                   | Irwin Winkler           | tt0352277 |
| 1746520418 | 1925 | 1925 | Galloping Jinx                      | The Galloping Jinx                  | Eddy, Robert                     | Robert Eddy             | tt0015851 |
| 1746577745 | 1935 | 1935 | It's in the Air                     | It's in the Air                     | Riesner, Charles F.              | Charles Reisner         | tt0026540 |
| 1746567241 | 1932 | 1932 | Back Street                         | Back Street                         | Stahl, John M.                   | John M. Stahl           | tt0022651 |
| 1746533000 | 1916 | 1916 | Going Straight                      | Going Straight                      | Franklin, C. M.; Franklin, S. A. | Chester M. Franklin     | tt0006731 |
| 1746394209 | 1992 | 1992 | Honeymoon in Vegas                  | Honeymoon in Vegas                  | Bergman, Andrew                  | Andrew Bergman          | tt0104438 |
| 1746574410 | 1962 | 1962 | Secret File: Hollywood              | Secret File: Hollywood              | Cushman, Ralph                   | Rudolph Cusumano        | tt0056460 |
| 1746566299 | 1957 | 1957 | Beginning of the End                | Beginning of the End                | Gordon, Bert I.                  | Bert I. Gordon          | tt0050177 |
| 1746577640 | 1937 | 1937 | The Westland Case                   | The Westland Case                   | Cabanne, Christy                 | Christy Cabanne         | tt0029757 |
| 1746524872 | 1915 | 1915 | The Master Hand                     | The Master Hand                     | Knoles, Harley                   | Harley Knoles           | tt0141587 |
| 1746577492 | 1951 | 1951 | The Whip Hand                       | The Whip Hand                       | Menzies, William Cameron         | William Cameron Menzies | tt0044209 |
| 1746524900 | 1915 | 1915 | Sin                                 | The Son                             | Brenon, Herbert                  | Percy Winter            | tt0284502 |
| 1746585140 | 1928 | 1928 | The Circus                          | The Circus                          | Chaplin, Charles                 | Charles Chaplin         | tt0018773 |
| 1746553433 | 1965 | 1965 | Curse of the Stone Hand             | Curse of the Stone Hand             | Warren, Jerry; Schleipper, Carl  | Carlos Hugo Christensen | tt0057987 |
| 1746584377 | 1937 | 1937 | Her Husband Lies                    | Her Husband Lies                    | Ludwig, Edward                   | Edward Ludwig           | tt0028992 |
| 1746464868 | 1945 | 1945 | Oregon Trail                        | Oregon Trail                        | Carr, Thomas                     | Thomas Carr             | tt0037961 |
| 1745357705 | 2002 | 2002 | I Am Trying to Break Your Heart     | I Am Trying to Break Your Heart     | Jones, Sam                       | Sam Jones               | tt0327920 |
| 1746565911 | 1957 | 1957 | Shoot-Out at Medicine Bend          | Shoot Out at Medicine Bend          | Bare, Richard L.                 | Richard L. Bare         | tt0050963 |
| 1746520479 | 1925 | 1926 | The Return of Grey Wolf             | The Return of Grey Wolf             | Rollens, Jacques                 | Jack Rollens            | tt0137192 |
| 1746496055 | 1919 | 1919 | The Rider of the Law                | Rider of the Law                    | Ford, Jack                       | John Ford               | tt0010628 |
| 1746514866 | 1915 | 1915 | The Silent Command                  | The Silent Command                  | Leonard, Robert                  | Robert Z. Leonard       | tt0006042 |
| 1746435429 | 1996 | 1996 | Faithful                            | Faithful                            | Mazursky, Paul                   | Paul Mazursky           | tt0116269 |
| 1746581397 | 1962 | 1962 | The Savage Guns                     | The Savage Guns                     | Carreras, Michael                | Michael Carreras        | tt0056448 |
| 1746408916 | 1982 | 1982 | Making Love                         | Making Love                         | Hiller, Arthur                   | Arthur Hiller           | tt0084293 |
| 1746584911 | 1939 | 1939 | Nancy Drew and the Hidden Staircase | Nancy Drew and the Hidden Staircase | Clemens, William                 | William Clemens         | tt0031708 |
| 1746577789 | 1935 | 1935 | Social Error                        | Social Error                        | Fraser, Harry                    | Harry L. Fraser         | tt0183796 |
| 1746582395 | 1931 | 1931 | Everything's Rosie                  | Everything's Rosie                  | Bruckman, Clyde                  | Clyde Bruckman          | tt0021840 |
| 1745340327 | 2002 | 2001 | Elvira's Haunted Hills              | Elvira's Haunted Hills              | Irvin, Sam                       | Sam Irvin               | tt0265171 |
| 1745293820 | 2007 | 2007 | Next                                | Next                                | Tamahori, Lee                    | Lee Tamahori            | tt0435705 |
| 1745293372 | 2007 | 2007 | Before the Devil Knows You're Dead  | Before the Devil Knows You're Dead  | Lumet, Sidney                    | Sidney Lumet            | tt0292963 |
| 1746520350 | 1925 | 1925 | Ten Days                            | Ten Days                            | Worne, Duke                      | Duke Worne              | tt0168218 |

|            |      |      |                                     |                                     |                       |                      |           |
|------------|------|------|-------------------------------------|-------------------------------------|-----------------------|----------------------|-----------|
| 1746582985 | 1936 | 1936 | Country Gentlemen                   | Country Gentlemen                   | Staub, Ralph          | Ralph Staub          | tt0027470 |
| 1746575079 | 1938 | 1938 | City Girl                           | City Girl                           | Werker, Alfred        | Alfred L. Werker     | tt0028721 |
| 1746574954 | 1938 | 1938 | Having Wonderful Time               | Having Wonderful Time               | Santell, Alfred       | Alfred Santell       | tt0030216 |
| 1746454081 | 1943 | 1943 | Corregidor                          | Corregidor                          | Nigh, William         | William Nigh         | tt0035755 |
| 1746583395 | 1930 | 1930 | Free and Easy                       | Free and Easy                       | Sedgwick, Edward      | Edward Sedgwick      | tt0020902 |
| 1746509557 | 1927 | 1927 | The Potters                         | The Potters                         | Newmeyer, Fred        | Fred C. Newmeyer     | tt0018274 |
| 1746393776 | 1987 | 1987 | Sign O' the Times                   | Sign 'o' the Times                  | Prince                | Prince               | tt0093970 |
| 1746424414 | 1942 | 1942 | Calling Dr. Gillespie               | Calling Dr. Gillespie               | Bucquet, Harold S.    | Harold S. Bucquet    | tt0034570 |
| 1746491809 | 1945 | 1945 | It's in the Bag!                    | It's in the Bag!                    | Wallace, Richard      | Richard Wallace      | tt0037823 |
| 1746421352 | 1992 | 1991 | Shakes the Clown                    | Shakes the Clown                    | Goldthwait, Bobcat    | Bobcat Goldthwait    | tt0102898 |
| 1746576909 | 1958 | 1958 | St. Louis Blues                     | St. Louis Blues                     | Reisner, Allen        | Allen Reisner        | tt0052234 |
| 1746436336 | 1943 | 1943 | Five Graves to Cairo                | Five Graves to Cairo                | Wilder, Billy         | Billy Wilder         | tt0035884 |
| 1746565884 | 1957 | 1957 | Gun for a Coward                    | Gun for a Coward                    | Biberman, Abner       | Abner Biberman       | tt0049285 |
| 1746520631 | 1949 | 1949 | Holiday Affair                      | Holiday Affair                      | Hartman, Don          | Don Hartman          | tt0041473 |
| 1745372544 | 2009 | 2009 | I Love You, Beth Cooper             | I Love You, Beth Cooper             | Columbus, Chris       | Chris Columbus       | tt1032815 |
| 1746572555 | 1932 | 1932 | Hypnotized                          | Hypnotized                          | Sennett, Mack         | Mack Sennett         | tt0023040 |
| 1746465133 | 1946 | 1946 | Swing Parade of 1946                | Swing Parade of 1946                | Karlson, Phil         | Phil Karlson         | tt0039003 |
| 1746578797 | 1963 | 1963 | The Checkered Flag                  | The Checkered Flag                  | Grefé, William        | William Grefé        | tt0055843 |
| 1746582476 | 1935 | 1935 | Charlie Chan in Shanghai            | Charlie Chan in Shanghai            | Tinling, James        | James Tinling        | tt0026199 |
| 1746582519 | 1935 | 1935 | Another Face                        | Another Face                        | Cabanne, Christy      | Christy Cabanne      | tt0026075 |
| 1746503053 | 1916 | 1916 | Hulda from Holland                  | Hulda from Holland                  | O'Brien, John B.      | John B. O'Brien      | tt0006831 |
| 1746409751 | 1988 | 1988 | Arthur 2 On the Rocks               | Arthur 2: On the Rocks              | Yorkin, Bud           | Bud Yorkin           | tt0094678 |
| 1746572187 | 1932 | 1932 | Young Bride                         | Young Bride                         | Seiter, William       | William A. Seiter    | tt0023720 |
| 1746555841 | 1955 | 1955 | Jump into Hell                      | Jump Into Hell                      | Butler, David         | David Butler         | tt0048235 |
| 1746435839 | 1996 | 1996 | Up Close and Personal               | Up Close & Personal                 | Avnet, Jon            | Jon Avnet            | tt0118055 |
| 1746199217 | 1965 | 1965 | The Rounders                        | The Rounders                        | Kennedy, Burt         | Burt Kennedy         | tt0059661 |
| 1746572352 | 1932 | 1932 | Horse Feathers                      | Horse Feathers                      | McLeod, Norman        | Norman Z. McLeod     | tt0023027 |
| 1746574494 | 1933 | 1934 | Public Stenographer                 | Public Stenographer                 | Collins, Lew          | Lewis D. Collins     | tt0025687 |
| 1746577509 | 1935 | 1935 | The Gay Deception                   | The Gay Deception                   | Wylar, William        | William Wylar        | tt0026400 |
| 1746439223 | 1997 | 1997 | Speed 2: Cruise Control             | Speed 2: Cruise Control             | de Bont, Jan          | Jan de Bont          | tt0120179 |
| 1745293780 | 2007 | 2007 | Music Within                        | Music Within                        | Sawalich, Steven      | Steven Sawalich      | tt0422783 |
| 1746570125 | 1933 | 1933 | The Phantom Broadcast               | The Phantom Broadcast               | Rosen, Phil           | Phil Rosen           | tt0024443 |
| 1746500915 | 1914 | 1914 | The Path Forbidden                  | The Path Forbidden                  | Handworth, Harry      | Harry Handworth      | tt0004458 |
| 1746473738 | 1944 | 1944 | Gaslight                            | Gaslight                            | Cukor, George         | George Cukor         | tt0036855 |
| 1746580259 | 1935 | 1935 | People Will Talk                    | People Will Talk                    | Santell, Alfred       | Alfred Santell       | tt0026860 |
| 1746218252 | 1965 | 1965 | The Collector                       | The Collector                       | Wylar, William        | William Wylar        | tt0059043 |
| 1746580244 | 1934 | 1934 | I Give My Love                      | I Give My Love                      | Freund, Karl          | Karl Freund          | tt0025281 |
| 1746584359 | 1940 | 1940 | Boom Town                           | Boom Town                           | Conway, Jack          | Jack Conway          | tt0032273 |
| 1746217463 | 1966 | 1966 | The Night of the Grizzly            | The Night of the Grizzly            | Pevney, Joseph        | Joseph Pevney        | tt0060754 |
| 1746555357 | 1957 | 1957 | The Crooked Circle                  | The Crooked Circle                  | Kane, Joe             | Joseph Kane          | tt0044520 |
| 1746574568 | 1952 | 1952 | Yankee Buccaneer                    | Yankee Buccaneer                    | De Cordova, Frederick | Frederick De Cordova | tt0045343 |
| 1746581455 | 1951 | 1951 | Texas Carnival                      | Texas Carnival                      | Walters, Charles      | Charles Walters      | tt0044117 |
| 1746585473 | 1940 | 1940 | The Shop Around the Corner          | The Shop Around the Corner          | Lubitsch, Ernst       | Ernst Lubitsch       | tt0033045 |
| 1746580346 | 1935 | 1935 | The Shadow of Silk Lennox           | The Shadow of Silk Lennox           | Kirkwood, Ray         | Ray Kirkwood         | tt0026981 |
| 1746582858 | 1938 | 1938 | You and Me                          | You and Me                          | Lang, Fritz           | Fritz Lang           | tt0030996 |
| 1745360012 | 2002 | 2001 | Who Is Cletis Tout?                 | Who Is Cletis Tout?                 | Ver Wiel, Chris       | Chris Ver Wiel       | tt0246500 |
| 1745342039 | 2008 | 2008 | Tropic Thunder                      | Tropic Thunder                      | Stiller, Ben          | Ben Stiller          | tt0942385 |
| 1746584667 | 1928 | 1928 | The Bullet Mark                     | The Bullet Mark                     | Paton, Stuart         | Stuart Paton         | tt0018731 |
| 1746571245 | 1934 | 1934 | The Curtain Falls                   | The Curtain Falls                   | Lamont, Charles       | Charles Lamont       | tt0025024 |
| 1746567436 | 1952 | 1952 | Monsoon                             | Monsoon                             | Amateau, Rodney       | Rod Amateau          | tt0046090 |
| 1746570410 | 1934 | 1934 | The Dude Ranger                     | The Dude Ranger                     | Cline, Edward F.      | Edward F. Cline      | tt0025073 |
| 1746555015 | 1964 | 1964 | Taggart                             | Taggart                             | Springsteen, R. G.    | R.G. Springsteen     | tt0058633 |
| 1746465053 | 1942 | 1942 | This Gun for Hire                   | This Gun for Hire                   | Tuttle, Frank         | Frank Tuttle         | tt0035432 |
| 1746570089 | 1934 | 1935 | Convention Girl                     | Convention Girl                     | Reed, Luther          | Luther Reed          | tt0026232 |
| 1746583189 | 1929 | 1929 | Dance Hall                          | Dance Hall                          | Brown, Melville       | Melville W. Brown    | tt0019797 |
| 1746186060 | 1966 | 1966 | Don't Worry, We'll Think of a Title | Don't Worry, We'll Think of a Title | Jones, Harmon         | Harmon Jones         | tt0060332 |
| 1746455146 | 1998 | 1998 | Enemy of the State                  | Enemy of the State                  | Scott, Tony           | Tony Scott           | tt0120660 |

|            |      |      |                                 |                                 |                                       |                       |           |
|------------|------|------|---------------------------------|---------------------------------|---------------------------------------|-----------------------|-----------|
| 1746582467 | 1939 | 1939 | Another Thin Man                | Another Thin Man                | Van Dyke, W. S.                       | W.S. Van Dyke         | tt0031047 |
| 1746574082 | 1959 | 1958 | Missile to the Moon             | Missile to the Moon             | Cunha, Richard                        | Richard E. Cunha      | tt0053072 |
| 1746492419 | 1946 | 1946 | The Return of Rusty             | The Return of Rusty             | Castle, William                       | William Castle        | tt0299112 |
| 1746424434 | 1943 | 1943 | Happy Go Lucky                  | Happy Go Lucky                  | Bernhardt, Curtis                     | Curtis Bernhardt      | tt0035969 |
| 1746473720 | 1942 | 1942 | American Empire                 | American Empire                 | McGann, William                       | William C. McGann     | tt0034455 |
| 1746584493 | 1931 | 1931 | Young Sinners                   | Young Sinners                   | Blystone, John                        | John G. Blystone      | tt0022590 |
| 1746583590 | 1950 | 1950 | Vendetta                        | Vendetta                        | Ferrer, Mel; Opuls, Max; Sturges, Pre | Mel Ferrer            | tt0043100 |
| 1746580387 | 1937 | 1937 | Law of the Ranger               | Law of the Ranger               | Bennett, Spencer Gordon               | Spencer Gordon Bennet | tt0029124 |
| 1769970578 | 1968 | 1968 | The Gay Life                    | The Gay Life                    | Foley, John                           | John Foley            | tt0219016 |
| 1746438935 | 1941 | 1941 | Cyclone on Horseback            | Cyclone on Horseback            | Killy, Edward                         | Edward Killy          | tt0033505 |
| 1746474813 | 1947 | 1947 | Dark Passage                    | Dark Passage                    | Daves, Delmer                         | Delmer Daves          | tt0039302 |
| 1746566921 | 1933 | 1933 | Mary Stevens, M.D.              | Mary Stevens, M.D.              | Bacon, Lloyd                          | Lloyd Bacon           | tt0024307 |
| 1746553995 | 1965 | 1965 | Red Line 7000                   | Red Line 7000                   | Hawks, Howard                         | Howard Hawks          | tt0059641 |
| 1746410125 | 1991 | 1991 | Cape Fear                       | Cape Fear                       | Scorsese, Martin                      | Martin Scorsese       | tt0101540 |
| 1746249060 | 1976 | 1976 | The Killer Inside Me            | The Killer Inside Me            | Kennedy, Burt                         | Burt Kennedy          | tt0074746 |
| 1746524483 | 1927 | 1927 | Spoilers of the West            | Spoilers of the West            | Van Dyke, W. S.                       | W.S. Van Dyke         | tt0018438 |
| 1746438694 | 1996 | 1996 | House Arrest                    | House Arrest                    | Winer, Harry                          | Harry Winer           | tt0116571 |
| 1746435701 | 1941 | 1941 | Her First Beau                  | Her First Beau                  | Reed, Theodore                        | Theodore Reed         | tt0033709 |
| 1769970672 | 1968 | 1968 | Come Play With Me               | Come Play with Me               | Cosentino, Nick                       | Nicolas Cosentino     | tt0215643 |
| 1746585264 | 1929 | 1929 | Little Johnny Jones             | Little Johnny Jones             | LeRoy, Mervyn                         | Mervyn LeRoy          | tt0020101 |
| 1746582980 | 1935 | 1935 | Curly Top                       | Curly Top                       | Cummings, Irving                      | Irving Cummings       | tt0026252 |
| 1746437926 | 1944 | 1944 | Marked Trails                   | Marked Trails                   | McCarthy, J. P.                       | John P. McCarthy      | tt0037050 |
| 1746566221 | 1958 | 1958 | I Bury the Living               | I Bury the Living               | Band, Albert                          | Albert Band           | tt0051755 |
| 1746393963 | 1990 | 1990 | Dances with Wolves              | Dances with Wolves              | Costner, Kevin                        | Kevin Costner         | tt0099348 |
| 1746583617 | 1930 | 1930 | The Fourth Alarm                | The Fourth Alarm                | Whitman, Phil                         | Phil Whitman          | tt0132982 |
| 1746487915 | 1917 | 1916 | The Burglar                     | The Burglar                     | Knoles, Harley                        | Pat Hartigan          | tt0321552 |
| 1746569865 | 1959 | 1959 | Anatomy of a Murder             | Anatomy of a Murder             | Preminger, Otto                       | Otto Preminger        | tt0052561 |
| 1746515300 | 1922 | 1922 | Too Much Wife                   | Too Much Wife                   | Heffron, Thomas N.                    | Thomas N. Heffron     | tt0013693 |
| 1746566856 | 1933 | 1933 | Justice Takes a Holiday         | Justice Takes a Holiday         | Bennet, Spencer Gordon                | Spencer Gordon Bennet | tt0024201 |
| 1746554221 | 1964 | 1964 | Fail Safe                       | Fail Safe                       | Lumet, Sidney                         | Sidney Lumet          | tt0058083 |
| 1746186097 | 1966 | 1965 | Son of a Gunfighter             | Son of a Gunfighter             | Landres, Paul                         | Paul Landres          | tt0059737 |
| 1746566219 | 1958 | 1958 | The Blob                        | The Blob                        | Yeaworth, Irvin S.                    | Irvin S. Yeaworth Jr. | tt0051418 |
| 1746520846 | 1949 | 1949 | Ride, Ryder, Ride!              | Ride, Ryder, Ride!              | Collins, Lewis D.                     | Lewis D. Collins      | tt0180098 |
| 1746501010 | 1916 | 1916 | The Sable Blessing              | The Sable Blessing              | Sargent, George L.                    | George L. Sargent     | tt0158907 |
| 1746464878 | 1942 | 1942 | Arabian Nights                  | Arabian Nights                  | Rawlins, John                         | John Rawlins          | tt0034465 |
| 1746435161 | 1942 | 1941 | Invasion                        | Invasion                        |                                       | Bud Pollard           | tt1417584 |
| 1745358083 | 2010 | 2010 | Wall Street: Money Never Sleeps | Wall Street: Money Never Sleeps | Stone, Oliver                         | Oliver Stone          | tt1027718 |
| 1746423273 | 1995 | 1995 | Mighty Aphrodite                | Mighty Aphrodite                | Allen, Woody                          | Woody Allen           | tt0113819 |
| 1745357707 | 2008 | 2008 | The Secret Life of Bees         | The Secret Life of Bees         | Prince-Bythewood, Gina                | Gina Prince           | tt0416212 |
| 1746474113 | 1945 | 1945 | Tarzan and the Amazons          | Tarzan and the Amazons          | Neumann, Kurt                         | Kurt Neumann          | tt0038151 |
| 1746185228 | 1965 | 1965 | One Way Wahine                  | One Way Wahine                  | Brown, William O.                     | William O. Brown      | tt0059543 |
| 1746496999 | 1922 | 1922 | Rose o' the Sea                 | Rose o' the Sea                 | Niblo, Fred                           | Fred Niblo            | tt0013560 |
| 1746504149 | 1918 | 1918 | Under Suspicion                 | Under Suspicion                 | Davis, Will S.                        | Will S. Davis         | tt0009743 |
| 1746563917 | 1951 | 1951 | Tomahawk                        | Tomahawk                        | Sherman, George                       | George Sherman        | tt0044135 |
| 1746216793 | 1967 | 1967 | The Last Challenge              | The Last Challenge              | Thorpe, Richard                       | Richard Thorpe        | tt0061893 |
| 1746582193 | 1928 | 1928 | The Flyin' Cowboy               | The Flyin' Cowboy               | Eason, Reeves                         | B. Reeves Eason       | tt0018901 |
| 1746394549 | 1984 | 1984 | Revenge of the Nerds            | Revenge of the Nerds            | Kanew, Jeff                           | Jeff Kanew            | tt0088000 |
| 1746509482 | 1925 | 1925 | Stella Maris                    | Stella Maris                    | Brabin, Charles J.                    | Charles Brabin        | tt0016396 |
| 1746453688 | 1999 | 1999 | The Rage: Carrie 2              | The Rage: Carrie 2              | Shea, Katt                            | Katt Shea             | tt0144814 |
| 1746571841 | 1932 | 1932 | Unashamed                       | Unashamed                       | Beaumont, Harry                       | Harry Beaumont        | tt0023635 |
| 1746565479 | 1952 | 1952 | And Now Tomorrow                | And Now Tomorrow                | Watson, William                       | William Watson        | tt0044354 |
| 1746473926 | 1945 | 1945 | The Power of the Whistler       | The Power of the Whistler       | Landers, Lew                          | Lew Landers           | tt0037997 |
| 1746584788 | 1930 | 1930 | Paid                            | Paid                            |                                       | Sam Wood              | tt0021228 |
| 1746582773 | 1938 | 1938 | Blondie                         | Blondie                         | Strayer, Frank R.                     | Frank R. Strayer      | tt0029927 |
| 1746487479 | 1918 | 1917 | The Goat                        | The Goat                        | Crisp, Donald                         | Arvid E. Gillstrom    | tt0269282 |
| 1746409970 | 1984 | 1984 | Conan the Destroyer             | Conan the Destroyer             | Fleischer, Richard                    | Richard Fleischer     | tt0087078 |
| 1746577264 | 1950 | 1950 | Deported                        | Deported                        | Siodmak, Robert                       | Robert Siodmak        | tt0042387 |

|            |      |      |                               |                               |                                      |                         |           |
|------------|------|------|-------------------------------|-------------------------------|--------------------------------------|-------------------------|-----------|
| 1746409136 | 1986 | 1986 | Quicksilver                   | Quicksilver                   | Donnelly, Tom                        | Thomas Michael Donnelly | tt0091814 |
| 1746500572 | 1924 | 1924 | Daughters of Pleasure         | Daughters of Pleasure         | Beaudine, William                    | William Beaudine        | tt0014833 |
| 1746577801 | 1935 | 1935 | Mad Love                      | Mad Love                      | Freund, Karl                         | Karl Freund             | tt0026663 |
| 1746456055 | 1997 | 1997 | Absolute Power                | Absolute Power                | Eastwood, Clint                      | Clint Eastwood          | tt0118548 |
| 1746520128 | 1925 | 1925 | Flying Fool                   | The Flying Fool               | Mattison, Frank S.                   | Lewis Seiler            | tt0450709 |
| 1746585360 | 1939 | 1939 | Mr. Smith Goes to Washington  | Mr. Smith Goes to Washington  | Capra, Frank                         | Frank Capra             | tt0031679 |
| 1746582972 | 1935 | 1935 | Speed Devils                  | Speed Devils                  | Henabery, Joseph                     | Joseph Henabery         | tt0027030 |
| 1746585255 | 1930 | 1930 | Lovin' the Ladies             | Lovin' the Ladies             | Brown, Melville                      | Melville W. Brown       | tt0021102 |
| 1746492735 | 1948 | 1948 | Port Said                     | Port Said                     | LeBorg, Reginald                     | Reginald Le Borg        | tt0040702 |
| 1746585248 | 1929 | 1929 | The Return of Sherlock Holmes | The Return of Sherlock Holmes | Dean, Basil                          | Basil Dean              | tt0020324 |
| 1746199829 | 1969 | 1969 | Wild Gypsies                  | Wild Gypsies                  | Ray, Marc B.                         | Marc B. Ray             | tt0192796 |
| 1746475250 | 1948 | 1948 | The Checkered Coat            | The Checkered Coat            | Cahn, Edward L.                      | Edward L. Cahn          | tt0040228 |
| 1746579066 | 1962 | 1962 | Big Red                       | Big Red                       | Tokar, Norman                        | Norman Tokar            | tt0055793 |
| 1745375290 | 2009 | 2008 | Goodbye Solo                  | Goodbye Solo                  | Bahrani, Ramin                       | Ramin Bahrani           | tt1095442 |
| 1746515056 | 1927 | 1927 | When a Man Loves              | When a Man Loves              | Crosland, Alan                       | Alan Crosland           | tt0018566 |
| 1746525088 | 1919 | 1919 | Blind Husbands                | Blind Husbands                | Stroheim, Erich                      | Erich von Stroheim      | tt0009937 |
| 1746502927 | 1914 | 1914 | Without Hope                  | Without Hope                  | Mace, Fred                           | Fred Mace               | tt0004828 |
| 1746218782 | 1977 | 1977 | Kingdom of the Spiders        | Kingdom of the Spiders        | Cardos, John "Bud"                   | John 'Bud' Cardos       | tt0076271 |
| 1746520503 | 1925 | 1925 | The Calgary Stampede          | The Calgary Stampede          | Blaché, Herbert                      | Herbert Blaché          | tt0015662 |
| 1746393503 | 1984 | 1984 | Body Double                   | Body Double                   | De Palma, Brian                      | Brian De Palma          | tt0086984 |
| 1746554005 | 1964 | 1964 | How To Succeed With Girls     | How to Succeed with Girls     | Biery, Edward A.                     | Edward A. Biery         | tt0150987 |
| 1746474520 | 1948 | 1948 | The Boy with Green Hair       | The Boy with Green Hair       | Losey, Joseph                        | Joseph Losey            | tt0040185 |
| 1746512596 | 1915 | 1915 | The Lily and the Rose         | The Lily and the Rose         | Powell, Paul                         | Paul Powell             | tt0005621 |
| 1746563511 | 1952 | 1951 | Chicago Calling               | Chicago Calling               | Reinhardt, John                      | John Reinhardt          | tt0043401 |
| 1746570717 | 1952 | 1951 | A Streetcar Named Desire      | A Streetcar Named Desire      | Kazan, Elia                          | Elia Kazan              | tt0044081 |
| 1746454811 | 1940 | 1940 | Legion of the Lawless         | Legion of the Lawless         | Howard, David                        | David Howard            | tt0032696 |
| 1746508002 | 1924 | 1924 | The Desert Sheik              | The Desert Sheik              | Terriss, Tom                         | Tom Terriss             | tt0014844 |
| 1746520626 | 1949 | 1949 | Adventure in Baltimore        | Adventure in Baltimore        | Wallace, Richard                     | Richard Wallace         | tt0041093 |
| 1746574664 | 1933 | 1933 | Men Must Fight                | Men Must Fight                | Selwyn, Edgar                        | Edgar Selwyn            | tt0024325 |
| 1745339912 | 2001 | 2001 | The Others                    | The Others                    | Amenábar, Alejandro                  | Alejandro Amenábar      | tt0230600 |
| 1746577455 | 1960 | 1960 | Kidnapped                     | Kidnapped                     | Stevenson, Robert                    | Robert Stevenson        | tt0053994 |
| 1746453706 | 2000 | 2000 | The Ladies Man                | The Ladies Man                | Hudlin, Reginald                     | Reginald Hudlin         | tt0213790 |
| 1746420886 | 1994 | 1994 | It Could Happen to You        | It Could Happen to You        | Bergman, Andrew                      | Andrew Bergman          | tt0110167 |
| 1746520962 | 1949 | 1949 | Red Stallion in the Rockies   | Red Stallion in the Rockies   | Murphy, Ralph                        | Ralph Murphy            | tt0041794 |
| 1746508036 | 1925 | 1925 | Fifth Avenue Models           | Fifth Avenue Models           | Gade, Svend                          | Svend Gade              | tt0015803 |
| 1746508921 | 1926 | 1926 | Hearts and Spangles           | Hearts and Spangles           | O'Connor, Frank                      | Frank O'Connor          | tt0134710 |
| 1746583215 | 1930 | 1930 | The Climax                    | The Climax                    | Hoffman, Renaud                      | Renaud Hoffman          | tt0020771 |
| 1746582424 | 1939 | 1939 | Bulldog Drummond's Bride      | Bulldog Drummond's Bride      | Hogan, James                         | James P. Hogan          | tt0031124 |
| 1746569962 | 1958 | 1958 | War of the Colossal Beast     | War of the Colossal Beast     | Gordon, Bert I.                      | Bert I. Gordon          | tt0052378 |
| 1745272030 | 2001 | 2001 | All Over the Guy              | All Over the Guy              | Davis, Julie                         | Julie Davis             | tt0250202 |
| 1746520924 | 1950 | 1950 | The Great Rupert              | The Great Rupert              | Pichel, Irving                       | Irving Pichel           | tt0042524 |
| 1746574717 | 1937 | 1937 | Love Takes Flight             | Love Takes Flight             | Nagel, Conrad                        | Conrad Nagel            | tt0029168 |
| 1746574061 | 1957 | 1957 | Plunder Road                  | Plunder Road                  | Cornfield, Hubert                    | Hubert Cornfield        | tt0050847 |
| 1746249802 | 1979 | 1979 | The Rose                      | The Rose                      | Rydell, Mark                         | Mark Rydell             | tt0079826 |
| 1746410737 | 1989 | 1989 | Jacknife                      | Jacknife                      | Jones, David                         | David Hugh Jones        | tt0097607 |
| 1746583608 | 1930 | 1930 | Cock o' the Walk              | Cock o' the Walk              | Neill, R. William; Lang, Walter      | Walter Lang             | tt0020773 |
| 1746550031 | 1954 | 1954 | Deep in My Heart              | Deep in My Heart              | Donen, Stanley                       | Stanley Donen           | tt0046896 |
| 1746581322 | 1962 | 1962 | No Man Is an Island           | No Man Is an Island           | Monks, Jr., John; Goldstone, Richard | Richard Goldstone       | tt0056283 |
| 1746424616 | 1942 | 1942 | Hillbilly Blitzkrieg          | Hillbilly Blitzkrieg          | Mack, Roy                            | Roy Mack                | tt0034854 |
| 1746520434 | 1927 | 1927 | Ranger of the North           | Ranger of the North           | Storm, Jerome                        | Jerome Storm            | tt0018306 |
| 1746574158 | 1959 | 1958 | Rally 'Round the Flag, Boys!  | Rally 'Round the Flag, Boys!  | McCarey, Leo                         | Leo McCarey             | tt0052117 |
| 1769971944 | 1969 | 1969 | House of Pain and Pleasure    | House of Pain and Pleasure    | Rotsler, William                     | William Rotsler         | tt0220540 |
| 1746453766 | 1941 | 1941 | I Wake Up Screaming           | I Wake Up Screaming           | Humberstone, Bruce                   | H. Bruce Humberstone    | tt0033740 |
| 1746503401 | 1920 | 1920 | Treasure Island               | Treasure Island               | Tourneur, Maurice                    | Maurice Tourneur        | tt0011785 |
| 1746577940 | 1934 | 1934 | Speed Wings                   | Speed Wings                   | Brower, Otto                         | Otto Brower             | tt0025819 |
| 1746420785 | 1993 | 1993 | Ed and His Dead Mother        | Ed and His Dead Mother        | Wacks, Jonathan                      | Jonathan Wacks          | tt0106792 |
| 1746574684 | 1935 | 1935 | Captured in Chinatown         | Captured in Chinatown         | Clifton, Elmer                       | Elmer Clifton           | tt0026177 |



|            |      |      |                                    |                                    |                           |                                     |           |
|------------|------|------|------------------------------------|------------------------------------|---------------------------|-------------------------------------|-----------|
| 1746503056 | 1916 | 1916 | The Revolt                         | The Revolt                         | O'Neil, Barry             | Barry O'Neil                        | tt0007261 |
| 1746492208 | 1947 | 1947 | Black Gold                         | Black Gold                         | Karlson, Phil             | Phil Karlson                        | tt0039191 |
| 1746580293 | 1937 | 1937 | 45 Fathers                         | 45 Fathers                         | Tinling, James            | James Tinling                       | tt0028543 |
| 1746584544 | 1931 | 1931 | Defenders of the Law               | Defenders of the Law               | Levering, Joseph          | Joseph Levering                     | tt0021792 |
| 1745309111 | 2005 | 2005 | Zathura: A Space Adventure         | Zathura: A Space Adventure         | Favreau, Jon              | Jon Favreau                         | tt0406375 |
| 1746502730 | 1916 | 1916 | The Love Girl                      | The Love Girl                      | Leonard, Robert Z.        | Robert Z. Leonard                   | tt0006946 |
| 1746577497 | 1936 | 1936 | Wives Never Know                   | Wives Never Know                   | Nugent, Elliott           | Elliott Nugent                      | tt0028514 |
| 1746580712 | 1936 | 1936 | Second Wife                        | Second Wife                        | Killy, Edward             | Edward Killy                        | tt0028229 |
| 1746410206 | 1988 | 1988 | They Live                          | They Live                          | Carpenter, John           | John Carpenter                      | tt0096256 |
| 1746582217 | 1929 | 1929 | Welcome Danger                     | Welcome Danger                     | Bruckman, Clyde           | Clyde Bruckman                      | tt0020572 |
| 1746570103 | 1952 | 1952 | Kangaroo                           | Kangaroo                           | Milestone, Lewis          | Lewis Milestone                     | tt0044788 |
| 1746497923 | 1918 | 1918 | The Sign Invisible                 | The Sign Invisible                 | Lewis, Edgar              | Edgar Lewis                         | tt0009615 |
| 1746573785 | 1960 | 1960 | Many Ways to Sin                   | Many Ways to Sin                   |                           | J.G. Tiger                          | tt2791252 |
| 1746524092 | 1910 | 1910 | Stunts on Skates                   | Stunts on Skates                   |                           |                                     | tt1907764 |
| 1745358687 | 2004 | 2003 | The United States of Leland        | The United States of Leland        |                           |                                     | tt0301976 |
| 1746583058 | 1935 | 1935 | Let's Live Tonight                 | Let's Live Tonight                 | Hoge, Matthew Ryan        | Matthew Ryan Hoge                   | tt0025593 |
| 1746520797 | 1925 | 1925 | Quicker'n Lightnin'                | Quicker'n Lightnin'                | Schertzinger, Victor      | Victor Schertzinger                 | tt0152119 |
| 1746392819 | 1984 | 1984 | The Wild Life                      | The Wild Life                      | Thorpe, Richard           | Richard Thorpe                      | tt0088402 |
| 1746216789 | 1968 | 1968 | Jigsaw                             | Jigsaw                             | Linson, Art               | Art Linson                          | tt0063155 |
| 1746576614 | 1910 | 1910 | The Desperado                      | The Desperado                      | Goldstone, James          | James Goldstone                     | tt0001180 |
| 1746574094 | 1960 | 1960 | Key Witness                        | Key Witness                        |                           | Gilbert M. 'Broncho Billy' Anderson | tt0053993 |
| 1746584775 | 1930 | 1930 | The Little Accident                | Little Accident                    | Karlson, Phil             | Phil Karlson                        | tt0021078 |
| 1746584885 | 1940 | 1940 | Men Against the Sky                | Men Against the Sky                | Craft, William James      | William James Craft                 | tt0032781 |
| 1746524038 | 1916 | 1916 | Alien Souls                        | Alien Souls                        | Goodwins, Leslie          | Leslie Goodwins                     | tt0006343 |
| 1745293890 | 2007 | 2007 | The Messengers                     | The Messengers                     | Reicher, Frank            | Frank Reicher                       | tt0425430 |
| 1746581084 | 1951 | 1951 | The Medium                         | The Medium                         | Pang, Danny ; Pang, Oxide | Danny Pang                          | tt0043794 |
| 1746560488 | 1932 | 1932 | Cannonball Express                 | Cannonball Express                 | Menotti, Gian-Carlo       | Gian Carlo Menotti                  | tt0022742 |
| 1746467406 | 1917 | 1917 | The Seventh Sin                    | The Seventh Sin                    | Fox, Wallace W.           | Wallace Fox                         | tt0182413 |
| 1746577678 | 1936 | 1936 | The Cowboy and the Kid             | The Cowboy and the Kid             |                           | Theodore Marston                    | tt0027472 |
| 1769969380 | 1932 | 1932 | The Boudoir Butler                 | The Boudoir Butler                 | Taylor, Ray               | Ray Taylor                          | tt0022717 |
| 1746491861 | 1947 | 1947 | Ramrod                             | Ramrod                             | Pearce, Leslie            | Leslie Pearce                       | tt0039750 |
| 1746423055 | 1994 | 1994 | The Mask                           | The Mask                           | DeToth, Andre             | André De Toth                       | tt0110475 |
| 1746580260 | 1936 | 1936 | Cain and Mabel                     | Cain and Mabel                     | Russell, Charles          | Chuck Russell                       | tt0027413 |
| 1746422360 | 1940 | 1940 | Millionaire Playboy                | Millionaire Playboy                | Bacon, Lloyd              | Lloyd Bacon                         | tt0032795 |
| 1746454210 | 1944 | 1944 | My Buddy                           | My Buddy                           | Goodwins, Leslie          | Leslie Goodwins                     | tt0037109 |
| 1746454599 | 1998 | 1998 | The Horse Whisperer                | The Horse Whisperer                | Sekely, Steve             | Steve Sekely                        | tt0119314 |
| 1745374717 | 2009 | 2009 | Alien Trespass                     | Alien Trespass                     | Redford, Robert           | Robert Redford                      | tt1122836 |
| 1746577585 | 1933 | 1933 | Laughter in Hell                   | Laughter in Hell                   | Goodwin, R. W.            | R.W. Goodwin                        | tt0024247 |
| 1746495784 | 1919 | 1919 | Hell Roarin' Reform                | Hell Roarin' Reform                | Cahn, Edward L.           | Edward L. Cahn                      | tt0010235 |
| 1746513392 | 1928 | 1928 | Masked Angel                       | The Masked Angel                   | LeSaint, Edward J.        | Edward LeSaint                      | tt0019149 |
| 1746585410 | 1940 | 1940 | Rebecca                            | Rebecca                            | O'Connor, Frank           | Frank O'Connor                      | tt0032976 |
| 1746474967 | 1948 | 1948 | Mystery in Mexico                  | Mystery in Mexico                  | Hitchcock, Alfred         | Alfred Hitchcock                    | tt0040631 |
| 1746520974 | 1949 | 1949 | The Younger Brothers               | The Younger Brothers               | Wise, Robert              | Robert Wise                         | tt0042061 |
| 1746581290 | 1910 | 1910 | The Little Doctor of the Foothills | The Little Doctor of the Foothills | Marin, Edwin L.           | Edwin L. Marin                      | tt0372382 |
| 1746410632 | 1993 | 1993 | The Secret Garden                  | The Secret Garden                  | Anderson, G. M.           | Gilbert M. 'Broncho Billy' Anderson | tt0108071 |
| 1746393446 | 1984 | 1983 | Sleepaway Camp                     | Sleepaway Camp                     | Holland, Agnieszka        | Agnieszka Holland                   | tt0086320 |
| 1746572307 | 1931 | 1931 | Unfaithful                         | Unfaithful                         | Hiltzik, Robert           | Robert Hiltzik                      | tt0022520 |
| 1746575661 | 1910 | 1910 | A Darling Confusion                | A Darling Confusion                | Cromwell, John            | John Cromwell                       | tt1644500 |
| 1746514071 | 1916 | 1916 | Lieutenant Danny, U.S.A.           | Lieutenant Danny, U.S.A.           |                           | Tom Ricketts                        | tt0159534 |
| 1746514765 | 1916 | 1916 | Mice and Men                       | Mice and Men                       | Edwards, Walter           | Walter Edwards                      | tt0007060 |
| 1746512319 | 1913 | 1913 | A Prisoner in the Harem            | A Prisoner in the Harem            | Dawley, J. Searle         | J. Searle Dawley                    | tt0003299 |
| 1746554917 | 1964 | 1964 | The Visit                          | The Visit                          | Blaché, Herbert           | Herbert Blaché                      | tt0058724 |
| 1746200058 | 1966 | 1966 | Hold On!                           | Hold On!                           | Wicki, Bernhard           | Bernhard Wicki                      | tt0060512 |
| 1746507885 | 1924 | 1924 | The Smoking Trail                  | Smoking Trails                     | Lubin, Arthur             | Arthur Lubin                        | tt0015344 |
| 1746562011 | 1955 | 1955 | Cult of the Cobra                  | Cult of the Cobra                  | Bertram, William          | William Bertram                     | tt0047966 |
| 1746543069 | 1915 | 1915 | Silver Threads Among the Gold      | Silver Threads Among the Gold      | Lyon, Francis D.          | Francis D. Lyon                     | tt0006046 |
| 1746582685 | 1937 | 1937 | Let's Get Married                  | Let's Get Married                  | Kingsley, Pierce          | Pierce Kingsley                     | tt0029135 |

|            |      |      |                                |                                |                         |                      |           |
|------------|------|------|--------------------------------|--------------------------------|-------------------------|----------------------|-----------|
| 1746492215 | 1945 | 1945 | Texas Panhandle                | Texas Panhandle                | Nazarro, Ray            | Ray Nazarro          | tt0039019 |
| 1746573988 | 1959 | 1959 | Inside the Mafia               | Inside the Mafia               | Cahn, Edward L.         | Edward L. Cahn       | tt0052927 |
| 1746501040 | 1916 | 1916 | The Garden of Allah            | The Garden of Allah            | Campbell, Colin         | Colin Campbell       | tt0007988 |
| 1746500294 | 1948 | 1948 | False Paradise                 | False Paradise                 | Archainbaud, George     | George Archainbaud   | tt0040339 |
| 1746570764 | 1933 | 1934 | Picture Brides                 | Picture Brides                 | Rosen, Phil             | Phil Rosen           | tt0024449 |
| 1746500677 | 1926 | 1926 | The Taxi Mystery               | The Taxi Mystery               | Windermere, Fred        | Fred Windemere       | tt0168212 |
| 1746514965 | 1927 | 1927 | Web of Fate                    | Web of Fate                    | Fitzgerald, Dallas M.   | Dallas M. Fitzgerald | tt0018551 |
| 1746579024 | 1959 | 1959 | The Young Land                 | The Young Land                 | Tetzlaff, Ted           | Ted Tetzlaff         | tt0053461 |
| 1746584051 | 1940 | 1940 | Cross-Country Romance          | Cross Country Romance          | Woodruff, Frank         | Frank Woodruff       | tt0032369 |
| 1745357620 | 2004 | 2004 | The Ladykillers                | The Ladykillers                | Coen, Joel; Coen, Ethan | Ethan Coen           | tt0335245 |
| 1746571008 | 1935 | 1935 | Dante's Inferno                | Dante's Inferno                | Lachman, Harry          | Harry Lachman        | tt0026262 |
| 1746572108 | 1931 | 1931 | The Spirit of Notre Dame       | The Spirit of Notre Dame       | Mack, Russell           | Russell Mack         | tt0022422 |
| 1746554679 | 1964 | 1964 | Zorba the Greek                | Zorba the Greek                | Cacoyannis, Michael     | Mihalis Kakogiannis  | tt0057831 |
| 1746465162 | 1942 | 1942 | Four Jacks and a Jill          | Four Jacks and a Jill          | Hively, Jack            | Jack Hively          | tt0034751 |
| 1746514125 | 1914 | 1914 | The Pursuit of the Phantom     | The Pursuit of the Phantom     | Bosworth, Hobart        | Hobart Bosworth      | tt0004504 |
| 1746497946 | 1918 | 1918 | Irish Eyes                     | Irish Eyes                     | Dowlan, William         | William C. Dowlan    | tt0128276 |
| 1746570074 | 1934 | 1934 | Palooka                        | Palooka                        | Stoloff, Benjamin       | Benjamin Stoloff     | tt0025619 |
| 1746509452 | 1927 | 1927 | Pioneers of the West           | Pioneers of the West           | Perez, Marcel           | Marcel Perez         | tt0018264 |
| 1746530766 | 1949 | 1949 | Prejudice                      | Prejudice                      | Cahn, Edward L.         | Edward L. Cahn       | tt0040708 |
| 1746393344 | 1981 | 1981 | The Cannonball Run             | The Cannonball Run             | Needham, Hal            | Hal Needham          | tt0082136 |
| 1769971962 | 1969 | 1969 | Eat Drink and Make Merrie      | Eat, Drink and Make Merrie     | Boyd, Whit              | Whit Boyd            | tt0136111 |
| 1746555823 | 1956 | 1956 | The Brave One                  | The Brave One                  | Rapper, Irving          | Irving Rapper        | tt0049030 |
| 1746185335 | 1965 | 1965 | The Glory Guys                 | The Glory Guys                 | Laven, Arnold           | Arnold Laven         | tt0059232 |
| 1746580399 | 1935 | 1935 | Awakening of Jim Burke         | The Awakening of Jim Burke     | Hillyer, Lambert        | Lambert Hillyer      | tt0026089 |
| 1746465282 | 1947 | 1947 | Killer at Large                | Killer at Large                | Beaudine, William       | William Beaudine     | tt0130060 |
| 1746503923 | 1918 | 1918 | The Eyes of Mystery            | The Eyes of Mystery            | Browning, Tod           | Tod Browning         | tt0009048 |
| 1746554068 | 1964 | 1964 | Rhino!                         | Rhino!                         | Tors, Ivan              | Ivan Tors            | tt0058522 |
| 1746435398 | 1998 | 1998 | Fear and Loathing in Las Vegas | Fear and Loathing in Las Vegas | Gilliam, Terry          | Terry Gilliam        | tt0120669 |
| 1746581904 | 1929 | 1929 | Marquis Preferred              | Marquis Preferred              | Tuttle, Frank           | Frank Tuttle         | tt0020145 |
| 1746183860 | 1910 | 1910 | The Barge Man of Old Holland   | The Barge Man of Old Holland   |                         |                      | tt0354404 |
| 1746582073 | 1928 | 1928 | Greased Lightning              | Greased Lightning              | Taylor, Ray             | Ray Taylor           | tt0018957 |
| 1746554680 | 1964 | 1964 | The Flesh Eaters               | The Flesh Eaters               | Curtis, Jack            | Jack Curtis          | tt0058101 |
| 1746583037 | 1935 | 1935 | Skybound                       | Skybound                       | Johnson, Raymond K.     | Bernard B. Ray       | tt0027008 |
| 1746561960 | 1954 | 1954 | Saskatchewan                   | Saskatchewan                   | Walsh, Raoul            | Raoul Walsh          | tt0047449 |
| 1746492570 | 1948 | 1948 | Street Corner                  | Street Corner                  | Kelley, Albert          | Albert H. Kelley     | tt0040842 |
| 1746423754 | 1990 | 1990 | Days of Thunder                | Days of Thunder                | Scott, Tony             | Tony Scott           | tt0099371 |
| 1746582909 | 1934 | 1934 | Whirlpool                      | Whirlpool                      | Neill, Roy William      | Roy William Neill    | tt0025983 |
| 1746503854 | 1919 | 1919 | Through the Toils              | Through the Toils              | Hoyt, Harry O.          | Harry O. Hoyt        | tt0010777 |
| 1746520593 | 1925 | 1925 | Bashful Jim                    | Bashful Jim                    | Cline, Eddie            | Edward F. Cline      | tt0015605 |
| 1745272602 | 2000 | 2000 | The Original Kings of Comedy   | The Original Kings of Comedy   | Lee, Spike              | Spike Lee            | tt0236388 |
| 1746577364 | 1961 | 1961 | Pocketful of Miracles          | Pocketful of Miracles          | Capra, Frank            | Frank Capra          | tt0055312 |
| 1745359821 | 2009 | 2009 | The Lovely Bones               | The Lovely Bones               | Jackson, Peter          | Peter Jackson        | tt0380510 |
| 1746525000 | 1923 | 1923 | To the Last Man                | To the Last Man                | Fleming, Victor         | Victor Fleming       | tt0014553 |
| 1746574191 | 1962 | 1962 | Jessica                        | Jessica                        | Negulesco, Jean         | Jean Negulesco       | tt0056117 |
| 1746567351 | 1932 | 1932 | McKenna of the Mounted         | McKenna of the Mounted         | Lederman, D. Ross       | D. Ross Lederman     | tt0023201 |
| 1746520533 | 1927 | 1927 | Tillie the Toiler              | Tillie the Toiler              | Henley, Hobart          | Hobart Henley        | tt0018487 |
| 1746581200 | 1910 | 1910 | Human Hearts                   | Human Hearts                   |                         | Hal Reid             | tt1156060 |
| 1746454201 | 1999 | 1999 | Galaxy Quest                   | Galaxy Quest                   | Parisot, Dean           | Dean Parisot         | tt0177789 |
| 1746584632 | 1930 | 1930 | The Lash                       | The Lash                       | Lloyd, Frank            | Frank Lloyd          | tt0021048 |
| 1746503399 | 1917 | 1917 | Under False Colors             | Under False Colors             | Chautard, Emile         | Emile Chautard       | tt0008715 |
| 1746585253 | 1930 | 1930 | The Spoilers                   | The Spoilers                   | Carewe, Edwin           | Edwin Carewe         | tt0021412 |
| 1746580448 | 1938 | 1938 | Paroled--To Die                | Paroled To Die                 | Newfield, Sam           | Sam Newfield         | tt0030556 |
| 1746475531 | 1945 | 1945 | Honeymoon Ahead                | Honeymoon Ahead                | Le Borg, Reginald       | Reginald Le Borg     | tt0037789 |
| 1746424058 | 1941 | 1941 | Dead Men Tell                  | Dead Men Tell                  | Lachman, Harry          | Harry Lachman        | tt0033519 |
| 1746497527 | 1917 | 1917 | God's Man                      | God's Man                      | Irving, George          | George Irving        | tt0008018 |
| 1746492060 | 1947 | 1947 | Tycoon                         | Tycoon                         | Wallace, Richard        | Richard Wallace      | tt0039927 |
| 1746504392 | 1922 | 1922 | Sunshine Harbor                | Sunshine Harbor                | Hemmer, Edward L.       | Edward L. Hemmer     | tt0167425 |

|            |      |      |                          |                          |                                  |                      |           |
|------------|------|------|--------------------------|--------------------------|----------------------------------|----------------------|-----------|
| 1746574375 | 1958 | 1957 | Snowfire                 | Snowfire                 | McGowan, Dorrell; McGowan, Stuar | Dorrell McGowan      | tt0147519 |
| 1746274170 | 1979 | 1979 | Real Life                | Real Life                | Brooks, Albert                   | Albert Brooks        | tt0079781 |
| 1746475744 | 1947 | 1947 | Daisy Kenyon             | Daisy Kenyon             | Preminger, Otto                  | Otto Preminger       | tt0039294 |
| 1746475914 | 1948 | 1948 | For the Love of Mary     | For the Love of Mary     | De Cordova, Frederick            | Frederick De Cordova | tt0040364 |
| 1746453924 | 1996 | 1996 | Kingpin                  | Kingpin                  | Farrelly, Peter; Farrelly, Bobby | Bobby Farrelly       | tt0116778 |
| 1746569937 | 1960 | 1959 | The Purple Gang          | The Purple Gang          | McDonald, Frank                  | Frank McDonald       | tt0054218 |
| 1745302863 | 2005 | 2005 | Assault on Precinct 13   | Assault on Precinct 13   | Richet, Jean-François            | Jean                 | tt0398712 |
| 1746560861 | 1932 | 1932 | The Penal Code           | The Penal Code           | Melford, George                  | George Melford       | tt0024434 |
| 1746520834 | 1925 | 1925 | Fangs of Fate            | Fangs of Fate            | Carpenter, Horace B.             | Horace B. Carpenter  | tt0131383 |
| 1769970150 | 1912 | 1912 | The Worth of a Man       | The Worth of a Man       | MacDonald, J. Farrell            | J. Farrell MacDonald | tt0257276 |
| 1746583794 | 1930 | 1930 | One Night at Susie's     | One Night at Susie's     | Dillon, John Francis             | John Francis Dillon  | tt0021216 |
| 1746497456 | 1921 | 1921 | The Broken Spur          | The Broken Spur          | Wilson, Ben                      | Ben F. Wilson        | tt0012004 |
| 1746520465 | 1926 | 1926 | The Night Patrol         | The Night Patrol         | Smith, Noel Mason                | Noel M. Smith        | tt0017207 |
| 1746509437 | 1925 | 1925 | Cactus Trails            | Cactus Trails            | Webb, Harry                      | Harry S. Webb        | tt0015661 |
| 1746514279 | 1927 | 1927 | The Down Grade           | The Down Grade           | Hutchison, Charles               | Charles Hutchison    | tt0017823 |
| 1746435340 | 1997 | 1997 | Metro                    | Metro                    | Carter, Thomas                   | Thomas Carter        | tt0119664 |
| 1746570292 | 1952 | 1952 | My Son John              | My Son John              | McCarey, Leo                     | Leo McCarey          | tt0044941 |
| 1746440021 | 1996 | 1996 | The Crucible             | The Crucible             | Hytner, Nicholas                 | Nicholas Hytner      | tt0115988 |
| 1746465416 | 1947 | 1947 | Linda, Be Good           | Linda, Be Good           | McDonald, Frank                  | Frank McDonald       | tt0039569 |
| 1746583937 | 1930 | 1930 | The Bad Man              | The Bad Man              | Badger, Clarence                 | Clarence G. Badger   | tt0020662 |
| 1746423494 | 1999 | 1999 | Jawbreaker               | Jawbreaker               | Stein, Darren                    | Darren Stein         | tt0155776 |
| 1746577971 | 1936 | 1936 | Soak the Rich            | Soak the Rich            | Hecht, Ben; MacArthur, Charles   | Ben Hecht            | tt0028273 |
| 1746453469 | 1942 | 1942 | Rings on Her Fingers     | Rings on Her Fingers     | Mamoulian, Rouben                | Rouben Mamoulian     | tt0035258 |
| 1746583970 | 1940 | 1940 | So You Won't Talk        | So You Won't Talk        | Sedgwick, Edward                 | Edward Sedgwick      | tt0033069 |
| 1746185700 | 1968 | 1967 | Battle Beneath the Earth | Battle Beneath the Earth | Tully, Montgomery                | Montgomery Tully     | tt0061387 |
| 1746583963 | 1930 | 1930 | Brothers                 | Brothers                 | Lang, Walter                     | Walter Lang          | tt0020716 |
| 1746416030 | 1917 | 1917 | The Long Trail           | The Long Trail           | Hansell, Howell                  | Howell Hansel        | tt0008214 |
| 1746574128 | 1961 | 1961 | Buffalo Gun              | Buffalo Gun              | Gannaway, Albert C.              | Albert C. Gannaway   | tt0174522 |
| 1746574424 | 1960 | 1959 | The Gazebo               | The Gazebo               | Marshall, George                 | George Marshall      | tt0052837 |
| 1746582742 | 1936 | 1936 | Under Two Flags          | Under Two Flags          | Lloyd, Frank                     | Frank Lloyd          | tt0028442 |
| 1746573380 | 1932 | 1932 | Silver Dollar            | Silver Dollar            | Green, Alfred E.                 | Alfred E. Green      | tt0023472 |
| 1746513243 | 1916 | 1916 | The Shrine of Happiness  | The Shrine of Happiness  | Bracken, Bertram                 | Bertram Bracken      | tt0158954 |
| 1745272126 | 2001 | 2001 | Bandits                  | Bandits                  | Levinson, Barry                  | Barry Levinson       | tt0219965 |
| 1746566027 | 1955 | 1955 | 5 Against the House      | 5 Against the House      | Karlson, Phil                    | Phil Karlson         | tt0048077 |
| 1746584125 | 1939 | 1939 | Bridal Suite             | Bridal Suite             | Thiele, William                  | Wilhelm Thiele       | tt0031120 |
| 1746577405 | 1962 | 1962 | Woman Hunt               | Womanhunt                | Dexter, Maury                    | Maury Dexter         | tt0056699 |
| 1746454959 | 1945 | 1945 | Life with Blondie        | Life with Blondie        | Berlin, Abby                     | Abby Berlin          | tt0038691 |
| 1746500122 | 1925 | 1925 | Just Plain Folks         | Just Plain Folks         | Bradbury, Robert N.              | Robert N. Bradbury   | tt4577762 |
| 1746560331 | 1965 | 1965 | What's New Pussycat?     | What's New Pussycat      | Donner, Clive                    | Clive Donner         | tt0059903 |
| 1746582674 | 1938 | 1938 | Go Chase Yourself        | Go Chase Yourself        | Cline, Edward F.                 | Edward F. Cline      | tt0030188 |
| 1746502383 | 1923 | 1923 | Little Johnny Jones      | Little Johnny Jones      | Rosson, Arthur; Hines, Johnny    | Johnny Hines         | tt0014204 |
| 1746581560 | 1928 | 1928 | A Race for Life          | A Race for Life          | Lederman, D. Ross                | D. Ross Lederman     | tt0019302 |
| 1746570340 | 1933 | 1933 | Tillie and Gus           | Tillie and Gus           | Martin, Francis                  | Francis Martin       | tt0024672 |
| 1746508063 | 1926 | 1926 | Beyond the Rockies       | Beyond the Rockies       | Nelson, Jack                     | Jack Nelson          | tt0016647 |
| 1746530798 | 1950 | 1950 | The Arizona Cowboy       | The Arizona Cowboy       | Springsteen, R. G.               | R.G. Springsteen     | tt0042203 |
| 1746555316 | 1954 | 1954 | The Golden Mistress      | The Golden Mistress      | Judge, Joel                      | Abner Biberman       | tt0047037 |
| 1746566898 | 1932 | 1932 | Born to Fight            | Born to Fight            | Mayo, Walter                     | Walter Mayo          | tt2088709 |
| 1746533004 | 1927 | 1927 | Eager Lips               | Eager Lips               | Noy, Wilfred                     | Wilfred Noy          | tt0017840 |
| 1746566908 | 1933 | 1933 | Morning Glory            | Morning Glory            | Sherman, Lowell                  | Lowell Sherman       | tt0024353 |
| 1746235686 | 1973 | 1973 | Superchick               | Superchick               | Forsyth, Ed                      | Ed Forsyth           | tt0070752 |
| 1746496850 | 1920 | 1920 | Away Goes Prudence       | Away Goes Prudence       | Robertson, John S.               | John S. Robertson    | tt0010975 |
| 1746435239 | 1941 | 1941 | They Met in Bombay       | They Met in Bombay       | Brown, Clarence                  | Clarence Brown       | tt0034281 |
| 1746580281 | 1935 | 1935 | Mutiny on the Bounty     | Mutiny on the Bounty     | Lloyd, Frank                     | Frank Lloyd          | tt0026752 |
| 1746520779 | 1926 | 1926 | Kiki                     | Kiki                     | Brown, Clarence                  | Clarence Brown       | tt0017029 |
| 1746492409 | 1945 | 1945 | Fashion Model            | Fashion Model            | Beaudine, William                | William Beaudine     | tt0037692 |
| 1746567021 | 1933 | 1933 | Forgotten Men            | Forgotten Men            | Pollard, Bud                     | Bud Pollard          | tt0150614 |
| 1746410371 | 1983 | 1982 | Purple Haze              | Purple Haze              | Morris, David Burton             | David Burton Morris  | tt0084553 |

|            |      |      |                                 |                                 |                      |                    |           |
|------------|------|------|---------------------------------|---------------------------------|----------------------|--------------------|-----------|
| 1746523964 | 1915 | 1915 | Beulah                          | Beulah                          | Bracken, Bertram     | Bertram Bracken    | tt0004963 |
| 1746583752 | 1928 | 1928 | Desperate Courage               | Desperate Courage               | Thorpe, Richard      | Richard Thorpe     | tt0018823 |
| 1746574718 | 1936 | 1936 | The Lawless Nineties            | The Lawless Nineties            | Kane, Joseph         | Joseph Kane        | tt0027876 |
| 1746524001 | 1917 | 1917 | The Dream Doll                  | The Dream Doll                  | Moss, Howard S.      | Howard S. Moss     | tt0193113 |
| 1746423340 | 1994 | 1994 | Fresh                           | Fresh                           | Yakin, Boaz          | Boaz Yakin         | tt0109842 |
| 1746501280 | 1917 | 1917 | His Father's Son                | His Father's Son                | Baker, George D.     | George D. Baker    | tt0008106 |
| 1746570752 | 1934 | 1934 | The Trumpet Blows               | The Trumpet Blows               | Roberts, Stephen     | Stephen Roberts    | tt0025915 |
| 1746508109 | 1926 | 1926 | Keep Going                      | Keep Going                      | Harvey, John         | Jack Harvey        | tt4205688 |
| 1746570013 | 1960 | 1960 | The Wizard of Baghdad           | The Wizard of Baghdad           | Sherman, George      | George Sherman     | tt0054481 |
| 1746514602 | 1923 | 1923 | The Famous Mrs. Fair            | The Famous Mrs. Fair            | Niblo, Fred          | Fred Niblo         | tt0014036 |
| 1746273680 | 1978 | 1978 | Midnight Express                | Midnight Express                | Parker, Alan         | Alan Parker        | tt0077928 |
| 1746437416 | 1942 | 1942 | Junior Army                     | Junior Army                     | Landers, Lew         | Lew Landers        | tt0036061 |
| 1746582741 | 1937 | 1937 | They Wanted to Marry            | They Wanted to Marry            | Landers, Lew         | Lew Landers        | tt0029657 |
| 1746491717 | 1947 | 1947 | It Happened in Brooklyn         | It Happened in Brooklyn         | Whorf, Richard       | Richard Whorf      | tt0039501 |
| 1769974260 | 1916 | 1916 | The Little Trespasser           | The Little Trespasser           | Williams, C. J.      | C.J. Williams      | tt0490644 |
| 1746503270 | 1918 | 1918 | Hearts of the World             | Hearts of the World             | Griffith, D. W.      | D.W. Griffith      | tt0009150 |
| 1746582942 | 1937 | 1937 | Easy Living                     | Easy Living                     | Leisen, Mitchell     | Mitchell Leisen    | tt0028816 |
| 1746394710 | 1990 | 1990 | The Adventures of Ford Fairlane | The Adventures of Ford Fairlane | Harlin, Renny        | Renny Harlin       | tt0098987 |
| 1746420138 | 1994 | 1994 | Cops & Robbers                  | Cops and Robbers                | Ritchie, Michael     | Michael Ritchie    | tt0109480 |
| 1746508114 | 1925 | 1925 | My Son                          | My Son                          | Carewe, Edwin        | Edwin Carewe       | tt0016137 |
| 1746454588 | 1997 | 1997 | Mad City                        | Mad City                        | Gavras, Costa        | Costa              | tt0119592 |
| 1746508203 | 1926 | 1926 | Brooding Eyes                   | Brooding Eyes                   | Le Saint, Edward J.  | Edward LeSaint     | tt0016688 |
| 1746393981 | 1985 | 1985 | The Color Purple                | The Color Purple                | Spielberg, Steven    | Steven Spielberg   | tt0088939 |
| 1746453855 | 1942 | 1942 | Cadets on Parade                | Cadets on Parade                | Landers, Lew         | Lew Landers        | tt0034564 |
| 1746583637 | 1929 | 1929 | The Delightful Rogue            | The Delightful Rogue            | Shores, Lynn         | Lynn Shores        | tt0019810 |
| 1746500384 | 1927 | 1927 | The Kid Brother                 | The Kid Brother                 | Wilde, Ted           | Ted Wilde          | tt0018051 |
| 1746420931 | 1940 | 1940 | Five Little Peppers at Home     | Five Little Peppers at Home     | Barton, Charles      | Charles Barton     | tt0032472 |
| 1746574655 | 1938 | 1938 | Gun Law                         | Gun Law                         | Howard, David        | David Howard       | tt0030207 |
| 1746424039 | 1941 | 1941 | Fugitive Valley                 | Fugitive Valley                 | Luby, S. Roy         | S. Roy Luby        | tt0033641 |
| 1769971200 | 1969 | 1969 | Slaves of Love                  | Slaves of Love                  | Nizet, Charles       | Charles Nizet      | tt0128531 |
| 1745340787 | 2002 | 2001 | Storytelling                    | Storytelling                    | Solondz, Todd        | Todd Solondz       | tt0250081 |
| 1746438926 | 1940 | 1940 | I'm Nobody's Sweetheart Now     | I'm Nobody's Sweetheart Now     | Lubin, Arthur        | Arthur Lubin       | tt0032621 |
| 1746514940 | 1927 | 1927 | The Fighting Three              | The Fighting Three              | Rogell, Albert       | Albert S. Rogell   | tt0017879 |
| 1746501211 | 1916 | 1915 | Who Killed Joe Merrion?         | Who Killed Joe Merrion?         | Johnson, Tefft       | Tefft Johnson      | tt0007562 |
| 1746583841 | 1931 | 1931 | Alice in Wonderland             | Alice in Wonderland             | Pollard, "Bud"       | Bud Pollard        | tt0021599 |
| 1746582143 | 1928 | 1928 | Sally of the Scandals           | Sally of the Scandals           | Shores, Lynn         | Lynn Shores        | tt0019349 |
| 1746512888 | 1915 | 1915 | Vengeance of the Wilds          | Vengeance of the Wilds          | Big Otto             | Otto Breitkreutz   | tt0006212 |
| 1745340086 | 2003 | 2002 | The Anarchist Cookbook          | The Anarchist Cookbook          | Susman, Jordan       | Jordan Susman      | tt0284850 |
| 1746409725 | 1920 | 1920 | Mrs. Temple's Telegram          | Mrs. Temple's Telegram          | Cruze, James         | James Cruze        | tt0011486 |
| 1746578539 | 1950 | 1950 | Wabash Avenue                   | Wabash Avenue                   | Koster, Henry        | Henry Koster       | tt0043116 |
| 1746422591 | 1996 | 1996 | Muppet Treasure Island          | Muppet Treasure Island          | Henson, Brian        | Brian Henson       | tt0117110 |
| 1746408836 | 1990 | 1990 | Arachnophobia                   | Arachnophobia                   | Marshall, Frank      | Frank Marshall     | tt0099052 |
| 1746499940 | 1946 | 1946 | Her Adventurous Night           | Her Adventurous Night           | Rawlins, John        | John Rawlins       | tt0038596 |
| 1746420770 | 1989 | 1989 | In Country                      | In Country                      | Jewison, Norman      | Norman Jewison     | tt0097570 |
| 1746500091 | 1924 | 1924 | Fools Highway                   | Fools Highway                   | Cummings, Irving     | Irving Cummings    | tt0014921 |
| 1746574501 | 1933 | 1933 | Dangerous Crossroads            | Dangerous Crossroads            | Hillyer, Lambert     | Lambert Hillyer    | tt0023927 |
| 1746409725 | 1981 | 1981 | The Postman Always Rings Twice  | The Postman Always Rings Twice  | Rafelson, Bob        | Bob Rafelson       | tt0082934 |
| 1746576871 | 1931 | 1931 | The Finger Points               | Finger Prints                   | Dillon, John Francis | Ray Taylor         | tt0021866 |
| 1746584607 | 1930 | 1930 | Kathleen Mavourneen             | Kathleen Mavourneen             | Ray, Albert          | Albert Ray         | tt0021023 |
| 1746576853 | 1931 | 1930 | New Moon                        | New Moon                        | Conway, Jack         | Jack Conway        | tt0021178 |
| 1746584978 | 1940 | 1940 | Buck Benny Rides Again          | Buck Benny Rides Again          | Sandrich, Mark       | Mark Sandrich      | tt0032289 |
| 1746533033 | 1915 | 1915 | God's Witness                   | God's Witness                   | Moore, Eugene W.     | Eugene Moore       | tt0005399 |
| 1746583824 | 1930 | 1930 | Du Barry, Woman of Passion      | Du Barry, Woman of Passion      | Taylor, Sam          | Sam Taylor         | tt0020844 |
| 1746500403 | 1927 | 1927 | Let It Rain                     | Let It Rain                     | Cline, Eddie         | Edward F. Cline    | tt0018084 |
| 1746492061 | 1944 | 1944 | Bermuda Mystery                 | Bermuda Mystery                 | Stoloff, Benjamin    | Benjamin Stoloff   | tt0036638 |
| 1746393540 | 1983 | 1983 | Silkwood                        | Silkwood                        | Nichols, Mike        | Mike Nichols       | tt0086312 |
| 1746455487 | 1997 | 1997 | Shadow Conspiracy               | Shadow Conspiracy               | Cosmatos, George P.  | George P. Cosmatos | tt0120107 |

|                   |             |             |                                      |                                      |                                  |                      |                  |
|-------------------|-------------|-------------|--------------------------------------|--------------------------------------|----------------------------------|----------------------|------------------|
| 1746554821        | 1955        | 1955        | African Manhunt                      | African Manhunt                      | Friedman, Seymour                | Seymour Friedman     | tt0050106        |
| 1746421001        | 1990        | 1990        | A Shock to the System                | A Shock to the System                | Egleson, Jan                     | Jan Egleson          | tt0100602        |
| 1746582734        | 1937        | 1937        | Call It a Day                        | Call It a Day                        | Mayo, Archie                     | Archie Mayo          | tt0028679        |
| 1745373751        | 2009        | 2009        | Halloween II                         | Halloween II                         | Zombie, Rob                      | Rob Zombie           | tt1311067        |
| 1746409089        | 1988        | 1988        | Tucker: The Man and His Dream        | Tucker: The Man and His Dream        | Coppola, Francis Ford            | Francis Ford Coppola | tt0096316        |
| 1746573961        | 1957        | 1957        | Tammy and the Bachelor               | Tammy and the Bachelor               | Pevney, Joseph                   | Joseph Pevney        | tt0051051        |
| 1746464912        | 1942        | 1942        | Springtime in the Rockies            | Springtime in the Rockies            | Cummings, Irving                 | Irving Cummings      | tt0035370        |
| 1745294007        | 2007        | 2007        | Everything's Cool                    | Everything's Cool                    | Gold, Daniel B.; Helfand, Judith | Daniel B. Gold       | tt0810970        |
| 1746466658        | 1917        | 1917        | The Snarl                            | The Snarl                            | West, Raymond B.                 | Raymond B. West      | tt0182431        |
| 1746579006        | 1951        | 1951        | Utah Wagon Train                     | Utah Wagon Train                     | Ford, Philip                     | Philip Ford          | tt0044175        |
| 1746512139        | 1916        | 1916        | The Devil's Bondwoman                | The Devil's Bondwoman                | Carleton, Lloyd B.               | Lloyd B. Carleton    | tt0006587        |
| 1746577997        | 1935        | 1935        | Square Shooter                       | Square Shooter                       | Selman, David                    | David Selman         | tt0027036        |
| 1746578999        | 1961        | 1961        | Romanoff and Juliet                  | Romanoff and Juliet                  | Ustinov, Peter                   | Peter Ustinov        | tt0055383        |
| 1746576027        | 1931        | 1931        | Pardon Us                            | Pardon Us                            | Parrott, James                   | James Parrott        | tt0022251        |
| 1746582615        | 1936        | 1936        | The Crime Patrol                     | The Crime Patrol                     | Cummings, Eugene                 | Eugene Cummings      | tt0027477        |
| 1746422535        | 1991        | 1991        | New Jack City                        | New Jack City                        | Van Peebles, Mario               | Mario Van Peebles    | tt0102526        |
| 1746435617        | 1940        | 1940        | Charter Pilot                        | Charter Pilot                        | Forde, Eugene                    | Eugene Forde         | tt0032328        |
| 1746583969        | 1939        | 1939        | The Escape                           | The Escape                           | Cortez, Richard                  | Ricardo Cortez       | tt0031279        |
| <b>1746565991</b> | <b>1957</b> | <b>1957</b> | <b>Domino Kid</b>                    | <b>Domino Kid</b>                    | <b>Nazarro, Ray</b>              | <b>Ray Nazarro</b>   | <b>tt0050325</b> |
| 1746453602        | 1941        | 1941        | Billy the Kid's Fighting Pals        | Billy the Kid's Fighting Pals        | Scott, Sherman                   | Sam Newfield         | tt0033393        |
| 1746500737        | 1949        | 1949        | Stallion Canyon                      | Stallion Canyon                      | Fraser, Harry                    | Harry L. Fraser      | tt0130281        |
| 1746438144        | 1996        | 1995        | Dead Man                             | Dead Man                             | Jarmusch, Jim                    | Jim Jarmusch         | tt0112817        |
| 1746550221        | 1955        | 1955        | Lady Godiva of Coventry              | Lady Godiva of Coventry              | Lubin, Arthur                    | Arthur Lubin         | tt0048279        |
| 1746421950        | 1995        | 1995        | Kiss of Death                        | Kiss of Death                        | Schroeder, Barbet                | Barbet Schroeder     | tt0113552        |
| 1746577184        | 1963        | 1963        | Terrified!                           | Terrified                            | Landers, Lew                     | Lew Landers          | tt0142906        |
| 1746502018        | 1915        | 1915        | Father and the Boys                  | Father and the Boys                  | De Grasse, Joseph                | Joseph De Grasse     | tt0005307        |
| 1746423745        | 1992        | 1992        | Honey, I Blew Up the Kid             | Honey I Blew Up the Kid              | Kleiser, Randal                  | Randal Kleiser       | tt0104437        |
| 1746419972        | 1993        | 1993        | Dragon: The Bruce Lee Story          | Dragon: The Bruce Lee Story          | Cohen, Rob                       | Rob Cohen            | tt0106770        |
| 1746577972        | 1939        | 1939        | Heroes in Blue                       | Heroes in Blue                       | Watson, William                  | William Watson       | tt0031421        |
| 1746465380        | 1947        | 1947        | Down to Earth                        | Down to Earth                        | Hall, Alexander                  | Alexander Hall       | tt0039337        |
| 1746508542        | 1926        | 1926        | Looking for Trouble                  | Looking for Trouble                  | Bradbury, Robert North           | Robert N. Bradbury   | tt0017079        |
| 1745358883        | 2004        | 2004        | Scooby-Doo 2: Monsters Unleashed     | Scooby Doo 2: Monsters Unleashed     | Gosnell, Raja                    | Raja Gosnell         | tt00331632       |
| 1746453519        | 1942        | 1942        | The Lady Has Plans                   | The Lady Has Plans                   | Lanfield, Sidney                 | Sidney Lanfield      | tt0034960        |
| 1746530688        | 1948        | 1948        | Yellow Sky                           | Yellow Sky                           | Wellman, William A.              | William A. Wellman   | tt0040978        |
| 1746435503        | 1941        | 1941        | Fiesta                               | Fiesta                               | Prinz, LeRoy                     | LeRoy Prinz          | tt0034730        |
| 1746582439        | 1937        | 1937        | Boss of Lonely Valley                | Boss of Lonely Valley                | Taylor, Ray                      | Ray Taylor           | tt0028657        |
| 1746423029        | 1991        | 1991        | Harley Davidson and the Marlboro Man | Harley Davidson and the Marlboro Man | Wincer, Simon                    | Simon Wincer         | tt0102005        |
| 1746581766        | 1910        | 1910        | Justinian and Theodora               | Justinian and Theodora               |                                  | Otis Turner          | tt0354677        |
| 1746565963        | 1953        | 1953        | Jamaica Run                          | Jamaica Run                          | Foster, Lewis R.                 | Lewis R. Foster      | tt0045927        |
| 1769971146        | 1969        | 1969        | Shannon's Women                      | Shannon's Women                      | Rotsler, William                 | William Rotsler      | tt0174198        |
| 1746584061        | 1935        | 1935        | The Lady in Scarlet                  | The Lady in Scarlet                  | Lamont, Charles                  | Charles Lamont       | tt0026599        |
| 1746410398        | 1992        | 1992        | A River Runs Through It              | A River Runs Through It              | Redford, Robert                  | Robert Redford       | tt0105265        |
| 1769969877        | 1912        | 1912        | A Dreamland Tragedy                  | A Dreamland Tragedy                  |                                  |                      | tt00361539       |
| 1746465173        | 1946        | 1946        | Home on the Range                    | Home on the Range                    | Springsteen, Robert              | R.G. Springsteen     | tt0038612        |
| 1746578658        | 1951        | 1951        | Danger Zone                          | Danger Zone                          | Berke, William                   | William Berke        | tt0043448        |
| 1746585397        | 1940        | 1940        | Sing, Dance, Plenty Hot              | Sing, Dance, Plenty Hot              | Landers, Lew                     | Lew Landers          | tt0033054        |
| 1746580599        | 1935        | 1935        | A Feather in Her Hat                 | A Feather in Her Hat                 | Santell, Alfred                  | Alfred Santell       | tt0026343        |
| 1769970540        | 1967        | 1967        | To Turn a Trick                      | To Turn a Trick                      |                                  | C. Davis Smith       | tt0128767        |
| 1746574462        | 1936        | 1936        | Kelly the Second                     | Kelly the Second                     | Meins, Gus                       | Gus Meins            | tt0027840        |
| 1746453500        | 1941        | 1941        | The Great Lie                        | The Great Lie                        | Goulding, Edmund                 | Edmund Goulding      | tt0033677        |
| 1745309382        | 2005        | 2004        | Black Cloud                          | Black Cloud                          | Schroder, Rick                   | Ricky Schroder       | tt0363475        |
| 1746584492        | 1930        | 1930        | She Got What She Wanted              | She Got What She Wanted              | Cruze, James                     | James Cruze          | tt0021361        |
| 1746394162        | 1982        | 1982        | The Verdict                          | The Verdict                          | Lumet, Sidney                    | Sidney Lumet         | tt0084855        |
| 1746583201        | 1931        | 1931        | The Good Bad Girl                    | The Good Bad Girl                    | Neill, R. William                | Roy William Neill    | tt0021921        |
| 1746524990        | 1928        | 1928        | Melody of Love                       | Melody of Love                       | Heath, A. B.                     | Arch Heath           | tt0019156        |
| 1746492742        | 1946        | 1946        | That Texas Jamboree                  | That Texas Jamboree                  | Nazarro, Ray                     | Ray Nazarro          | tt0039021        |
| 1746554886        | 1957        | 1957        | Time Limit                           | Time Limit                           | Malden, Karl                     | Karl Malden          | tt0051083        |

|            |      |      |                                |                                |                                 |                         |           |
|------------|------|------|--------------------------------|--------------------------------|---------------------------------|-------------------------|-----------|
| 1746208648 | 1968 | 1968 | No More Excuses                | No More Excuses                | Downey, Robert                  | Robert Downey Sr.       | tt0251300 |
| 1746583495 | 1930 | 1930 | Holiday                        | Holiday                        | Griffith, Edward H.             | Edward H. Griffith      | tt0020985 |
| 1746500562 | 1926 | 1926 | Mike                           | Mike                           | Neilan, Marshall                | Marshall Neilan         | tt0017148 |
| 1746475284 | 1944 | 1944 | Bride by Mistake               | Bride by Mistake               | Wallace, Richard                | Richard Wallace         | tt0036671 |
| 1746500246 | 1926 | 1926 | The Test of Donald Norton      | The Test of Donald Norton      | Eason, B. Reeves                | B. Reeves Eason         | tt0017454 |
| 1746524264 | 1915 | 1915 | From the Valley of the Missing | From the Valley of the Missing | Powell, Frank                   | Frank Powell            | tt0005363 |
| 1746198083 | 1968 | 1968 | Day of the Evil Gun            | Day of the Evil Gun            | Thorpe, Jerry                   | Jerry Thorpe            | tt0062865 |
| 1746394242 | 1987 | 1987 | The Princess Bride             | The Princess Bride             | Reiner, Rob                     | Rob Reiner              | tt0093779 |
| 1746577003 | 1961 | 1961 | A Raisin in the Sun            | A Raisin in the Sun            | Petrie, Daniel                  | Daniel Petrie           | tt0055353 |
| 1769970396 | 1966 | 1966 | Indiscreet Stairway            | Indiscreet Stairway            | Ren-Mart                        | Ron Mart                | tt0221274 |
| 1746577520 | 1935 | 1935 | Men of Action                  | Men of Action                  | James, Alan                     | Alan James              | tt0026700 |
| 1746576516 | 1931 | 1931 | East of Borneo                 | East of Borneo                 | Melford, George                 | George Melford          | tt0021828 |
| 1746409438 | 1982 | 1982 | Young Doctors in Love          | Young Doctors in Love          | Marshall, Garry                 | Garry Marshall          | tt0084938 |
| 1746581117 | 1950 | 1950 | Where the Sidewalk Ends        | Where the Sidewalk Ends        | Preminger, Otto                 | Otto Preminger          | tt0043132 |
| 1745360014 | 2002 | 2002 | Friday After Next              | Friday After Next              | Raboy, Marcus                   | Marcus Raboy            | tt0293815 |
| 1746514296 | 1915 | 1915 | The Truth About Helen          | The Truth About Helen          | McGlynn, Frank                  | Frank McGlynn Sr.       | tt0006185 |
| 1746508991 | 1924 | 1924 | A Self-Made Failure            | A Self Made Failure            | Beaudine, William               | William Beaudine        | tt0015314 |
| 1746561055 | 1932 | 1932 | The Famous Ferguson Case       | The Famous Ferguson Case       | Bacon, Lloyd                    | Lloyd Bacon             | tt0022876 |
| 1745309375 | 2007 | 2007 | Talk to Me                     | Talk to Me                     | Lemmons, Kasi                   | Kasi Lemmons            | tt0796368 |
| 1745282858 | 2005 | 2005 | Roll Bounce                    | Roll Bounce                    | Lee, Malcolm D.                 | Malcolm D. Lee          | tt0403455 |
| 1746487340 | 1920 | 1920 | Skyfire                        | Skyfire                        | Hart, Neal                      | Neal Hart               | tt0197891 |
| 1746574414 | 1960 | 1960 | The Crowning Experience        | The Crowning Experience        | Tegström, Rickard               | Marion Clayton Anderson | tt0052715 |
| 1746492400 | 1947 | 1947 | The Big Fix                    | The Big Fix                    | Flood, James                    | James Flood             | tt0039185 |
| 1746563920 | 1952 | 1952 | The Big Trees                  | The Big Trees                  | Feist, Felix                    | Felix E. Feist          | tt0044420 |
| 1746580315 | 1937 | 1937 | Stars over Arizona             | Stars Over Arizona             | Bradbury, Robert N.             | Robert N. Bradbury      | tt0030792 |
| 1745374345 | 2010 | 2010 | The Karate Kid                 | The Karate Kid                 | Zwart, Harald                   | Harald Zwart            | tt1155076 |
| 1746409263 | 1992 | 1992 | Singles                        | Singles                        | Crowe, Cameron                  | Cameron Crowe           | tt0105415 |
| 1746554913 | 1965 | 1965 | The Family Jewels              | The Family Jewels              | Lewis, Jerry                    | Jerry Lewis             | tt0059166 |
| 1746491710 | 1946 | 1946 | Tomorrow Is Forever            | Tomorrow Is Forever            | Pichel, Irving                  | Irving Pichel           | tt0039041 |
| 1746500033 | 1946 | 1946 | The Secret of the Whistler     | Secret of the Whistler         | Sherman, George                 | George Sherman          | tt0038917 |
| 1746454650 | 1940 | 1940 | Diamond Frontier               | Diamond Frontier               | Schuster, Harold                | Harold D. Schuster      | tt0032394 |
| 1746492757 | 1946 | 1946 | The Shadow Returns             | The Shadow Returns             | Rosen, Phil                     | Phil Rosen              | tt0038926 |
| 1746574499 | 1935 | 1935 | The Healer                     | The Healer                     | Barker, Reginald                | Reginald Barker         | tt0026637 |
| 1746584626 | 1930 | 1930 | Mountain Justice               | Mountain Justice               | Brown, Harry J.                 | Harry Joe Brown         | tt0021160 |
| 1746434883 | 1999 | 1999 | The Mummy                      | The Mummy                      | Sommers, Stephen                | Stephen Sommers         | tt0120616 |
| 1746577361 | 1959 | 1959 | Beloved Infidel                | Beloved Infidel                | King, Henry                     | Henry King              | tt0052617 |
| 1746577989 | 1937 | 1937 | Love Under Fire                | Love Under Fire                | Marshall, George                | George Marshall         | tt0029169 |
| 1746577983 | 1935 | 1935 | Bride of Frankenstein          | Bride of Frankenstein          | Whale, James                    | James Whale             | tt0026138 |
| 1746516275 | 1921 | 1921 | Lavender and Old Lace          | Lavender and Old Lace          | Ingraham, Lloyd                 | Lloyd Ingraham          | tt0012381 |
| 1746233144 | 1969 | 1969 | Castle Keep                    | Castle Keep                    | Pollack, Sydney                 | Sydney Pollack          | tt0064137 |
| 1746256785 | 1978 | 1978 | Same Time, Next Year           | Same Time, Next Year           | Mulligan, Robert                | Robert Mulligan         | tt0078199 |
| 1746185350 | 1965 | 1965 | A Thousand Clowns              | A Thousand Clowns              | Coe, Fred                       | Fred Coe                | tt0059798 |
| 1746582996 | 1939 | 1939 | The Forgotten Woman            | The Forgotten Woman            | Young, Harold                   | Harold Young            | tt0031331 |
| 1746508479 | 1925 | 1925 | The Prairie Wife               | The Prairie Wife               | Ballin, Hugo                    | Hugo Ballin             | tt0016239 |
| 1746454028 | 1943 | 1943 | First Comes Courage            | First Comes Courage            | Arzner, Dorothy; Vidor, Charles | Dorothy Arzner          | tt0035883 |
| 1746393522 | 1981 | 1981 | Prince of the City             | Prince of the City             | Lumet, Sidney                   | Sidney Lumet            | tt0082945 |
| 1746561491 | 1932 | 1932 | Just a Pain in the Parlor      | Just a Pain in the Parlor      | Marshall, George                | George Marshall         | tt0456488 |
| 1746422040 | 1992 | 1992 | Malcolm X                      | Malcolm X                      | Lee, Spike                      | Spike Lee               | tt0104797 |
| 1746508571 | 1950 | 1950 | Key to the City                | Key to the City                | Sidney, George                  | George Sidney           | tt0042634 |
| 1746524287 | 1916 | 1916 | The Moment Before              | The Moment Before              | Vignola, Robert G.              | Robert G. Vignola       | tt0007089 |
| 1746503677 | 1920 | 1920 | Sic-Em                         | Sic Em                         | Sullivan, Frederic              | Frederick Sullivan      | tt0177222 |
| 1746533010 | 1914 | 1914 | The Mystery of Edwin Drood     | The Mystery of Edwin Drood     | Blaché, Herbert; Terriss, Tom   | Herbert Blaché          | tt0004376 |
| 1746251471 | 1975 | 1975 | The Strongest Man in the World | The Strongest Man in the World | McEveety, Vincent               | Vincent McEveety        | tt0073760 |
| 1746583061 | 1940 | 1940 | Secrets of a Model             | Secrets of a Model             | Newfield, Sam                   | Sam Newfield            | tt0033033 |
| 1746515691 | 1922 | 1922 | The Woman Who Believed         | The Woman Who Believed         | Harvey, John                    | Jack Harvey             | tt0181169 |
| 1746561411 | 1932 | 1932 | Gambling Sex                   | Gambling Sex                   | Newmeyer, Fred                  | Fred C. Newmeyer        | tt0022926 |
| 1746578869 | 1962 | 1962 | Don't Knock the Twist          | Don't Knock the Twist          | Rudolph, Oscar                  | Oscar Rudolph           | tt0055922 |

|            |      |      |                                |                                |                                                      |           |
|------------|------|------|--------------------------------|--------------------------------|------------------------------------------------------|-----------|
| 1745342925 | 2003 | 2003 | The Matrix Reloaded            | The Matrix Reloaded            | Wachowski, Andy; Wachowski, Larry Lana Wachowski     | tt0234215 |
| 1745272453 | 2000 | 2000 | Time Code                      | Timecode                       | Figgis, Mike Mike Figgis                             | tt0220100 |
| 1746423495 | 2000 | 2000 | The Cell                       | The Cell                       | Singh, Tarsem Tarsem Singh                           | tt0209958 |
| 1745372569 | 2008 | 2008 | Over Her Dead Body             | Over Her Dead Body             | Lowell, Jeff Jeff Lowell                             | tt0785007 |
| 1746581569 | 1910 | 1910 | The Honor of His Family        | The Honor of His Family        | Griffith, D. W. D.W. Griffith                        | tt0001254 |
| 1746465114 | 1946 | 1946 | Sunset Pass                    | Sunset Pass                    | Berke, William William Berke                         | tt0038996 |
| 1746583984 | 1938 | 1938 | Who Killed Gail Preston?       | Who Killed Gail Preston?       | Barsha, Leon Leon Barsha                             | tt0030974 |
| 1746570364 | 1933 | 1933 | The Invisible Man              | The Invisible Man              | Whale, James James Whale                             | tt0024184 |
| 1746583703 | 1930 | 1930 | Redemption                     | Redemption                     | Niblo, Fred Fred Niblo                               | tt0021292 |
| 1746218681 | 1973 | 1973 | Terror in the Wax Museum       | Terror in the Wax Museum       | Fenady, Georg Georg Fenady                           | tt0070783 |
| 1745357641 | 2010 | 2010 | Dinner for Schmucks            | Dinner for Schmucks            | Roach, Jay Jay Roach                                 | tt0427152 |
| 1746560695 | 1965 | 1965 | Finger on the Trigger          | Finger on the Trigger          | Pink, Sidney Sidney W. Pink                          | tt0059178 |
| 1746574078 | 1956 | 1956 | The Houston Story              | The Houston Story              | Castle, William William Castle                       | tt0049340 |
| 1746567998 | 1952 | 1952 | What Price Glory               | What Price Glory               | Ford, John John Ford                                 | tt0045323 |
| 1746525042 | 1920 | 1920 | Live Sparks                    | Live Sparks                    | Warde, Ernest C. Ernest C. Warde                     | tt0196706 |
| 1746584945 | 1939 | 1939 | The Man in the Iron Mask       | The Man in the Iron Mask       | Whale, James James Whale                             | tt0031619 |
| 1746581619 | 1928 | 1928 | The Scarlet Lady               | The Scarlet Lady               | Crosland, Alan Alan Crosland                         | tt0019358 |
| 1746584520 | 1930 | 1930 | Golden Dawn                    | Golden Dawn                    | Enright, Ray Ray Enright                             | tt0020926 |
| 1746501085 | 1916 | 1916 | The Masked Rider               | The Masked Rider               | Balshofer, Fred J. Fred J. Balshofer                 | tt0007046 |
| 1746424551 | 1943 | 1943 | Happy Land                     | Happy Land                     | Pichel, Irving Irving Pichel                         | tt0035970 |
| 1746569637 | 1958 | 1957 | Paradise Lagoon                | Paradise Lagoon                | Gilbert, Lewis Lewis Gilbert                         | tt0050100 |
| 1746532957 | 1915 | 1915 | Fanchon the Cricket            | Fanchon, the Cricket           | Kirkwood, James James Kirkwood                       | tt0005302 |
| 1746497639 | 1921 | 1921 | The Call of His People         | The Call of His People         |                                                      | tt0012993 |
| 1746571013 | 1934 | 1934 | This Side of Heaven            | This Side of Heaven            | Howard, William K. William K. Howard                 | tt0025883 |
| 1746409357 | 1990 | 1990 | Hard to Kill                   | Hard to Kill                   | Malmuth, Bruce Bruce Malmuth                         | tt0099739 |
| 1746584730 | 1928 | 1928 | The Wild West Show             | The Wild West Show             | Andrews, Del Del Andrews                             | tt0019582 |
| 1746582663 | 1937 | 1937 | Maytime                        | Maytime                        | Leonard, Robert Z. Robert Z. Leonard                 | tt0029222 |
| 1746500400 | 1925 | 1925 | Eve's Secret                   | Eve's Secret                   | Badger, Clarence Clarence G. Badger                  | tt0015784 |
| 1746585408 | 1939 | 1939 | First Offenders                | First Offenders                | McDonald, Frank Frank McDonald                       | tt0031312 |
| 1746565947 | 1953 | 1953 | Problem Girls                  | Problem Girls                  | Dupont, E. A. Ewald André Dupont                     | tt0046212 |
| 1746580739 | 1936 | 1936 | Charlie Chan at the Race Track | Charlie Chan at the Race Track | Humberstone, H. Bruce H. Bruce Humberstone           | tt0027441 |
| 1746524388 | 1923 | 1923 | Vanity Fair                    | Vanity Fair                    | Ballin, Hugo Hugo Ballin                             | tt0014572 |
| 1746454372 | 1945 | 1945 | Flaming Bullets                | Flaming Bullets                | Fraser, Harry Harry L. Fraser                        | tt0037704 |
| 1746532452 | 1923 | 1923 | Wolves of the Border           | Wolves of the Border           | Neitz, Alvin J. Alvin J. Neitz                       | tt0014620 |
| 1769973191 | 1970 | 1969 | I Want More                    | I Want More                    | Beap, Jack Jack Beap                                 | tt0125210 |
| 1746422516 | 1994 | 1994 | The Shawshank Redemption       | The Shawshank Redemption       | Darabont, Frank Frank Darabont                       | tt0111161 |
| 1746583899 | 1931 | 1931 | Fair Warning                   | Fair Warning                   | Werker, Alfred L. Alfred L. Werker                   | tt0020868 |
| 1746509041 | 1925 | 1925 | Galloping On                   | Galloping On                   | Thorpe, Richard Richard Thorpe                       | tt0015852 |
| 1745359222 | 2010 | 2010 | Cyrus                          | Cyrus                          | Duplass, Jay ; Duplass, Mark Jay Duplass             | tt1336617 |
| 1745340973 | 2003 | 2003 | Matchstick Men                 | Matchstick Men                 | Scott, Ridley Ridley Scott                           | tt0325805 |
| 1746508755 | 1927 | 1927 | The Lovelorn                   | The Lovelorn                   | McCarthy, John P. John P. McCarthy                   | tt0018116 |
| 1746486803 | 1919 | 1919 | The Invisible Bond             | The Invisible Bond             | Maigne, Charles Charles Maigne                       | tt0010301 |
| 1746567104 | 1952 | 1952 | Son of Paleface                | Son of Paleface                | Tashlin, Frank Frank Tashlin                         | tt0045177 |
| 1745272336 | 2000 | 2000 | Screwed                        | Screwed                        | Alexander, Scott; Karaszewski, Larry Scott Alexander | tt0156323 |
| 1746564804 | 1952 | 1952 | Waco                           | Waco                           | Collins, Lewis Lewis D. Collins                      | tt0045304 |
| 1746566253 | 1953 | 1953 | Fort Ti                        | Fort Ti                        | Castle, William William Castle                       | tt0045784 |
| 1746514204 | 1917 | 1917 | Somewhere in America           | Somewhere in America           | Dowlan, William C. William C. Dowlan                 | tt0125506 |
| 1746585105 | 1928 | 1928 | The Bronc Stomper              | The Bronc Stomper              | Maloney, Leo D. Leo D. Maloney                       | tt0018726 |
| 1746580665 | 1935 | 1935 | The Last Wilderness            | The Last Wilderness            |                                                      | tt0126381 |
| 1745302816 | 2007 | 2007 | Brooklyn Rules                 | Brooklyn Rules                 | Corrente, Michael Michael Corrente                   | tt0283503 |
| 1746235281 | 1972 | 1972 | Fat City                       | Fat City                       | Huston, John John Huston                             | tt0068575 |
| 1746464808 | 1945 | 1945 | The Enchanted Forest           | The Enchanted Forest           | Landers, Lew Lew Landers                             | tt0037672 |
| 1746572784 | 1931 | 1931 | Secret Service                 | Secret Service                 | Ruben, J. Walter J. Walter Ruben                     | tt0022356 |
| 1746487278 | 1920 | 1920 | Down on the Farm               | Down on the Farm               | Kenton, Erle; Grey, Ray; Jones, Richa Ray Grey       | tt0011128 |
| 1745342865 | 2010 | 2010 | The Other Guys                 | The Other Guys                 | McKay, Adam Adam McKay                               | tt1386588 |
| 1746577800 | 1936 | 1936 | Theodora Goes Wild             | Theodora Goes Wild             | Boleslawski, Richard Richard Boleslawski             | tt0028355 |
| 1746574693 | 1937 | 1937 | Wild and Woolly                | Wild and Woolly                | Werker, Alfred Alfred L. Werker                      | tt0029779 |

|            |      |      |                               |                               |                                  |                     |           |
|------------|------|------|-------------------------------|-------------------------------|----------------------------------|---------------------|-----------|
| 1746573718 | 1932 | 1932 | Love Me Tonight               | Love Me Tonight               | Mamoulian, Rouben                | Rouben Mamoulian    | tt0023158 |
| 1746574701 | 1938 | 1938 | Tarnished Angel               | Tarnished Angel               | Goodwins, Leslie                 | Leslie Goodwins     | tt0030831 |
| 1746438098 | 1999 | 1999 | Runaway Bride                 | Runaway Bride                 | Marshall, Garry                  | Garry Marshall      | tt0163187 |
| 1746483175 | 1917 | 1917 | The Apple-Tree Girl           | The Apple Tree Girl           | Crosland, Alan                   | Alan Crosland       | tt0007645 |
| 1746520288 | 1924 | 1924 | Women Who Give                | Women Who Give                | Barker, Reginald                 | Reginald Barker     | tt0015510 |
| 1746532749 | 1916 | 1916 | Ignorance                     | Ignorance                     | Fitzgerald, James A.             | James A. Fitzgerald | tt0157788 |
| 1746465314 | 1947 | 1947 | Shoot to Kill                 | Shoot to Kill                 | Berke, William                   | William Berke       | tt0039820 |
| 1746582337 | 1928 | 1928 | Dog Justice                   | Dog Justice                   | Storm, Jerome                    | Jerome Storm        | tt0126266 |
| 1746392966 | 1981 | 1981 | Final Exam                    | Final Exam                    | Huston, Jimmy                    | Jimmy Huston        | tt0082378 |
| 1746577784 | 1936 | 1937 | Border Phantom                | Border Phantom                | Luby, S. Roy                     | S. Roy Luby         | tt0028649 |
| 1746500625 | 1949 | 1949 | Little Women                  | Little Women                  | LeRoy, Mervyn                    | Mervyn LeRoy        | tt0041594 |
| 1746515084 | 1921 | 1921 | The Fire Eater                | The Fire Eater                | Eason, Reeves                    | B. Reeves Eason     | tt0012171 |
| 1746393539 | 1984 | 1984 | Killpoint                     | Killpoint                     | Harris, Frank                    | Frank Harris        | tt0087556 |
| 1746508452 | 1925 | 1925 | Marry Me                      | Marry Me                      | Cruze, James                     | James Cruze         | tt0016095 |
| 1746435725 | 1943 | 1943 | Follies Girl                  | Follies Girl                  | Rowland, William                 | William Rowland     | tt0035893 |
| 1746392928 | 1985 | 1985 | Agnes of God                  | Agnes of God                  | Jewison, Norman                  | Norman Jewison      | tt0088683 |
| 1746530672 | 1949 | 1949 | The Walking Hills             | The Walking Hills             | Sturges, John                    | John Sturges        | tt0042033 |
| 1746561805 | 1957 | 1957 | Daughter of Dr. Jekyll        | Daughter of Dr. Jekyll        | Ulmer, Edgar G.                  | Edgar G. Ulmer      | tt0050292 |
| 1746454046 | 1942 | 1942 | The Yanks Are Coming          | The Yanks Are Coming          | Thurn-Taxis, Alexis              | Alexis Thurn        | tt0035576 |
| 1746570104 | 1934 | 1934 | I Sell Anything               | I Sell Anything               | Florey, Robert                   | Robert Florey       | tt0025284 |
| 1746507859 | 1925 | 1925 | The Necessary Evil            | The Necessary Evil            | Archainbaud, George              | George Archainbaud  | tt0016148 |
| 1746500223 | 1926 | 1926 | The Still Alarm               | The Still Alarm               | Laemmle, Edward                  | Edward Laemmle      | tt0017431 |
| 1746583935 | 1928 | 1928 | The Head of the Family        | The Head of the Family        | Boyle, Joseph C.                 | Joseph Boyle        | tt0018982 |
| 1746486330 | 1917 | 1917 | Weavers of Life               | The Weavers of Life           | Warren, Edward                   | Edward Warren       | tt0008753 |
| 1746409358 | 1981 | 1981 | Saturday the 14th             | Saturday the 14th             | Cohen, Howard R.                 | Howard R. Cohen     | tt0083033 |
| 1746583693 | 1931 | 1931 | Salvation Nell                | Salvation Nell                | Cruze, James                     | James Cruze         | tt0022338 |
| 1746514900 | 1917 | 1916 | Her Better Self               | Her Better Self               | Vignola, Robert G.               | Grace Cunard        | tt0329169 |
| 1745374402 | 2009 | 2009 | Gamer                         | Gamer                         | Nevelndine, Mark ; Taylor, Brian | Mark Nevelndine     | tt1034032 |
| 1746393992 | 1986 | 1986 | The Mosquito Coast            | The Mosquito Coast            | Weir, Peter                      | Peter Weir          | tt0091557 |
| 1746584057 | 1939 | 1939 | Three Smart Girls Grow Up     | Three Smart Girls Grow Up     | Koster, Henry                    | Henry Koster        | tt0032030 |
| 1746208621 | 1969 | 1969 | The Babysitter                | The Babysitter                | Henderson, Don                   | Don Henderson       | tt0064055 |
| 1746499935 | 1924 | 1924 | Christine of the Hungry Heart | Christine of the Hungry Heart | Archainbaud, George              | George Archainbaud  | tt0014772 |
| 1746487285 | 1920 | 1920 | A Beggar in Purple            | A Beggar in Purple            | Lewis, Edgar                     | Edgar Lewis         | tt0186863 |
| 1746218100 | 1966 | 1966 | The Year of the Horse         | The Year of the Horse         | Sunasky, Irving                  | Irving Sunasky      | tt0303246 |
| 1746210455 | 1971 | 1971 | Minnie and Moskowitz          | Minnie and Moskowitz          | Cassavetes, John                 | John Cassavetes     | tt0067433 |
| 1746581529 | 1928 | 1928 | The Trail of '98              | The Trail of '98              | Brown, Clarence                  | Clarence Brown      | tt0019489 |
| 1769969407 | 1911 | 1911 | The Price                     | The Price                     |                                  | Edwin S. Porter     | tt1298595 |
| 1746583074 | 1935 | 1935 | Gold Diggers of 1935          | Gold Diggers of 1935          | Berkeley, Busby                  | Busby Berkeley      | tt0026421 |
| 1746421595 | 1989 | 1989 | Casualties of War             | Casualties of War             | De Palma, Brian                  | Brian De Palma      | tt0097027 |
| 1746582711 | 1938 | 1938 | Wild Horse Canyon             | Wild Horse Canyon             | Hill, Robert                     | Robert F. Hill      | tt0032129 |
| 1746217265 | 1966 | 1966 | The Carolyn Lima Story        | The Carolyn Lima Story        | Rowe, John                       | John Rowe           | tt0212044 |
| 1746574069 | 1961 | 1961 | Portrait of a Mobster         | Portrait of a Mobster         | Pevney, Joseph                   | Joseph Pevney       | tt0055317 |
| 1746570403 | 1933 | 1933 | Made on Broadway              | Made on Broadway              | Beaumont, Harry                  | Harry Beaumont      | tt0024288 |
| 1746210946 | 1971 | 1971 | The Abominable Dr. Phibes     | The Abominable Dr. Phibes     | Fuest, Robert                    | Robert Fuest        | tt0066740 |
| 1746424429 | 1942 | 1942 | Stand by All Networks         | Stand By All Networks         | Landers, Lew                     | Lew Landers         | tt0035378 |
| 1746563506 | 1952 | 1952 | Face to Face                  | Face to Face                  |                                  | John Brahm          | tt0044601 |
| 1746576835 | 1910 | 1910 | Examination Day at School     | Examination Day at School     | Griffith, D. W.                  | D.W. Griffith       | tt0001202 |
| 1746415773 | 1917 | 1917 | Miss Nobody                   | Miss Nobody                   | Parke, William                   | William Parke       | tt0008302 |
| 1746511798 | 1915 | 1915 | The Campbells Are Coming      | The Campbells Are Coming      | Ford, Francis                    | Francis Ford        | tt0005050 |
| 1746500069 | 1924 | 1924 | Daring Chances                | Daring Chances                | Smith, Clifford S.               | Clifford Smith      | tt0014827 |
| 1746422563 | 1940 | 1940 | Calling Philo Vance           | Calling Philo Vance           | Clemens, William                 | William Clemens     | tt0032299 |
| 1746578671 | 1951 | 1951 | The Bushwhackers              | The Bushwhackers              | Amateau, Rod                     | Rod Amateau         | tt0044460 |
| 1746500558 | 1926 | 1926 | The Devil's Gulch             | The Devil's Gulch             | Nelson, Jack                     | Jack Nelson         | tt0016786 |
| 1745309606 | 2005 | 2005 | Rize                          | Rize                          | LaChapelle, David                | David LaChapelle    | tt0436724 |
| 1746209559 | 1968 | 1968 | The Acid Eaters               | The Acid Eaters               | Elliott, B. Ron                  | Byron Mabe          | tt0061329 |
| 1746577254 | 1962 | 1962 | Moon Pilot                    | Moon Pilot                    | Neilson, James                   | James Neilson       | tt0056249 |
| 1746555414 | 1956 | 1956 | Hollywood or Bust             | Hollywood or Bust             | Tashlin, Frank                   | Frank Tashlin       | tt0049322 |



|            |      |      |                                 |                                 |                          |                      |           |
|------------|------|------|---------------------------------|---------------------------------|--------------------------|----------------------|-----------|
| 1746574617 | 1936 | 1936 | The Three Mesquiteers           | The Three Mesquiteers           | Taylor, Ray              | Ray Taylor           | tt0028372 |
| 1746542636 | 1924 | 1924 | Is Love Everything?             | Is Love Everything?             | Cabanne, William Christy | Christy Cabanne      | tt0015017 |
| 1746585482 | 1939 | 1939 | Romance of the Redwoods         | Romance of the Redwoods         | Vidor, Charles           | Charles Vidor        | tt0031873 |
| 1746200031 | 1967 | 1967 | For Love & Money                | For Love and Money              | Davis, Don               | Donald A. Davis      | tt0129097 |
| 1746464979 | 1942 | 1942 | Eyes in the Night               | Eyes in the Night               | Zinnemann, Fred          | Fred Zinnemann       | tt0034711 |
| 1746514435 | 1910 | 1910 | Ramona                          | Ramona                          | Griffith, D. W.          | D.W. Griffith        | tt0001371 |
| 1745372663 | 2010 | 2010 | Greenberg                       | Greenberg                       | Baumbach, Noah           | Noah Baumbach        | tt1234654 |
| 1746520795 | 1926 | 1926 | The Man From the West           | The Man from the West           | Rogell, Albert           | Albert S. Rogell     | tt0017108 |
| 1745358669 | 2009 | 2009 | The Twilight Saga: New Moon     | The Twilight Saga: New Moon     | Weitz, Chris             | Chris Weitz          | tt1259571 |
| 1746584148 | 1936 | 1936 | Jailbreak                       | Jailbreak                       | Grinde, Nick             | Nick Grinde          | tt0027814 |
| 1746582452 | 1937 | 1937 | Love on Toast                   | Love on Toast                   | Dupont, E. A.            | Ewald André Dupont   | tt0030389 |
| 1769970454 | 1967 | 1967 | Uncle Tomcat's House of Kittens | Uncle Tomcat's House of Kittens | Purdue, Gunther          | Gunther Perdue       | tt0260473 |
| 1746467439 | 1917 | 1917 | Betty to the Rescue             | Betty to the Rescue             | Reicher, Frank           | Frank Reicher        | tt0007700 |
| 1746532851 | 1927 | 1927 | Clancy's Kosher Wedding         | Clancy's Kosher Wedding         | Gillstrom, Arvid E.      | Arvid E. Gillstrom   | tt0017756 |
| 1746509312 | 1924 | 1923 | Don't Call It Love              | Don't Call It Love              | de Mille, William C.     | William C. de Mille  | tt0014852 |
| 1746492599 | 1947 | 1947 | Ladies' Man                     | Ladies' Man                     | Russell, William D.      | William D. Russell   | tt0039544 |
| 1746574550 | 1933 | 1933 | Day of Reckoning                | Day of Reckoning                | Brabin, Charles          | Charles Brabin       | tt0023932 |
| 1746578697 | 1950 | 1950 | The Tougher They Come           | The Tougher They Come           | Nazarro, Ray             | Ray Nazarro          | tt0043060 |
| 1746574658 | 1933 | 1933 | The Power and the Glory         | The Power and the Glory         | Howard, William K.       | William K. Howard    | tt0024465 |
| 1746514691 | 1927 | 1927 | Don Desperado                   | Don Desperado                   | Maloney, Leo             | Leo D. Maloney       | tt0130627 |
| 1746514244 | 1927 | 1927 | If I Were Single                | If I Were Single                | Del Ruth, Roy            | Roy Del Ruth         | tt0018022 |
| 1746454014 | 1942 | 1942 | Gallant Lady                    | Gallant Lady                    | Beaudine, William        | William Beaudine     | tt0034766 |
| 1745282900 | 2005 | 2005 | Syriana                         | Syriana                         | Gaghan, Stephen          | Stephen Gaghan       | tt0365737 |
| 1745359437 | 2004 | 2004 | Eurotrip                        | EuroTrip                        | Schaffer, Jeff           | Jeff Schaffer        | tt0356150 |
| 1746554888 | 1956 | 1956 | Moby Dick                       | Moby Dick                       | Huston, John             | John Huston          | tt0049513 |
| 1746574973 | 1933 | 1933 | Bed of Roses                    | Bed of Roses                    | LaCava, Gregory          | Gregory La Cava      | tt0023786 |
| 1746184716 | 1965 | 1965 | Dear Brigitte                   | Dear Brigitte                   | Koster, Henry            | Henry Koster         | tt0059094 |
| 1746502232 | 1916 | 1916 | Thrown to the Lions             | Thrown to the Lions             | Henderson, Lucius        | Lucius Henderson     | tt0007458 |
| 1746580213 | 1938 | 1938 | Time Out for Murder             | Time Out for Murder             | Humberstone, H. Bruce    | H. Bruce Humberstone | tt0030873 |
| 1746580217 | 1938 | 1938 | The Invisible Menace            | The Invisible Menace            | Farrow, John             | John Farrow          | tt0030277 |
| 1746185662 | 1965 | 1965 | The Greatest Story Ever Told    | The Greatest Story Ever Told    | Stevens, George          | George Stevens       | tt0059245 |
| 1745372417 | 2003 | 2003 | Hollywood Homicide              | Hollywood Homicide              | Shelton, Ron             | Ron Shelton          | tt0329717 |
| 1746577531 | 1937 | 1937 | Life Begins with Love           | Life Begins with Love           | McCarey, Raymond B.      | Ray McCarey          | tt0029143 |
| 1746435616 | 1942 | 1942 | Tumbleweed Trail                | Tumbleweed Trail                | Stewart, Peter           | Sam Newfield         | tt0235121 |
| 1746454936 | 1945 | 1945 | Delightfully Dangerous          | Delightfully Dangerous          | Lubin, Arthur            | Arthur Lubin         | tt0037636 |
| 1746514635 | 1915 | 1915 | Buckshot John                   | Buckshot John                   | Bosworth, Hobart         | Hobart Bosworth      | tt0005032 |
| 1746581034 | 1960 | 1960 | Tess of the Storm Country       | Tess of the Storm Country       | Guilfoyle, Paul          | Paul Guilfoyle       | tt0054376 |
| 1746584743 | 1928 | 1927 | The Jazz Singer                 | The Jazz Singer                 | Crosland, Alan           | Alan Crosland        | tt0018037 |
| 1746453569 | 1944 | 1944 | See Here, Private Hargrove      | See Here, Private Hargrove      | Ruggles, Wesley          | Wesley Ruggles       | tt0037256 |
| 1745359677 | 2001 | 2001 | Joy Ride                        | Joy Ride                        | Dahl, John               | John Dahl            | tt0206314 |
| 1769971184 | 1969 | 1969 | Ragina's Secrets                | Ragina's Secrets                | Hand, Fletcher           | Fletcher Hand        | tt0256298 |
| 1746574735 | 1937 | 1937 | The Roaming Cowboy              | The Roaming Cowboy              | Hill, Robert             | Robert F. Hill       | tt0029493 |
| 1746408713 | 1985 | 1984 | Night Patrol                    | Night Patrol                    | Kong, Jackie             | Jackie Kong          | tt0087795 |
| 1746475503 | 1944 | 1944 | Hi, Good Lookin'!               | Hi, Good Lookin'!               | Lilley, Edward           | Edward C. Lilley     | tt0036917 |
| 1745358021 | 2009 | 2009 | Brüno                           | Brüno                           | Charles, Larry           | Larry Charles        | tt0889583 |
| 1746234416 | 1966 | 1966 | Stagecoach                      | Stagecoach                      | Douglas, Gordon          | Gordon Douglas       | tt0061024 |
| 1746508247 | 1927 | 1927 | Polly of the Movies             | Polly of the Movies             | Pembroke, Scott          | Scott Pembroke       | tt0018270 |
| 1746542688 | 1926 | 1926 | Racing Blood                    | Racing Blood                    | Richardson, Frank        | Frank Richardson     | tt0017303 |
| 1746475774 | 1947 | 1947 | Green Dolphin Street            | Green Dolphin Street            | Saville, Victor          | Victor Saville       | tt0039437 |
| 1746514496 | 1916 | 1916 | Jealousy                        | Jealousy                        | Davis, Will S.           | Will S. Davis        | tt0006879 |
| 1746574856 | 1934 | 1934 | The Secret of the Chateau       | Secret of the Chateau           | Thorpe, Richard          | Richard Thorpe       | tt0025758 |
| 1745340931 | 2001 | 2001 | Save the Last Dance             | Save the Last Dance             | Carter, Thomas           | Thomas Carter        | tt0206275 |
| 1746454694 | 1945 | 1945 | Brewster's Millions             | Brewster's Millions             | Dwan, Allan              | Allan Dwan           | tt0037557 |
| 1746273013 | 1979 | 1979 | Phantasm                        | Phantasm                        | Coscarelli, Don          | Don Coscarelli       | tt0079714 |
| 1745358518 | 2009 | 2009 | State of Play                   | State of Play                   | Macdonald, Kevin         | Kevin Macdonald      | tt0473705 |
| 1746577292 | 1961 | 1961 | Gun Fight                       | Gun Fight                       | Cahn, Edward L.          | Edward L. Cahn       | tt0054951 |
| 1746584415 | 1936 | 1936 | Song of the Gringo              | Song of the Gringo              | McCarthy, John           | John P. McCarthy     | tt0028283 |

|                   |             |             |                                 |                                 |                                     |                       |                  |
|-------------------|-------------|-------------|---------------------------------|---------------------------------|-------------------------------------|-----------------------|------------------|
| 1746465271        | 1942        | 1942        | X Marks the Spot                | X Marks the Spot                | Sherman, George                     | George Sherman        | tt0035570        |
| 1746570737        | 1933        | 1933        | Whistling in the Dark           | Whistling in the Dark           | Nugent, Elliott                     | Elliott Nugent        | tt0024769        |
| 1746524759        | 1923        | 1923        | The Woman With Four Faces       | The Woman with Four Faces       | Brenon, Herbert                     | Herbert Brenon        | tt0014621        |
| 1769970469        | 1967        | 1967        | Scarf of Mist, Thigh of Satin   | Scarf of Mist Thigh of Satin    | Sarno, Joe                          | Joseph W. Sarno       | tt0060945        |
| 1746464861        | 1941        | 1941        | The Bride Came C.O.D.           | The Bride Came C.O.D.           | Keighley, William                   | William Keighley      | tt0033432        |
| 1746553932        | 1965        | 1965        | Harum Scarum                    | Harum Scarum                    | Nelson, Gene                        | Gene Nelson           | tt0059255        |
| 1746410665        | 1994        | 1994        | I Love Trouble                  | I Love Trouble                  | Shyer, Charles                      | Charles Shyer         | tt0110093        |
| 1746454411        | 1997        | 1997        | Gattaca                         | Gattaca                         | Niccol, Andrew                      | Andrew Niccol         | tt0119177        |
| 1746508711        | 1926        | 1926        | The Fighting Cheat              | The Fighting Cheat              | Thorpe, Richard                     | Richard Thorpe        | tt0016858        |
| 1746525141        | 1920        | 1920        | Uncle Sam of Freedom Ridge      | Uncle Sam of Freedom Ridge      | Beranger, George A.                 | George Beranger       | tt0145550        |
| 1746573364        | 1932        | 1932        | Rain                            | Rain                            | Milestone, Lewis                    | Lewis Milestone       | tt0023369        |
| 1769970663        | 1968        | 1968        | Wall of Flesh                   | The Wall of Flesh               | Sarno, Joe                          | Joseph W. Sarno       | tt0062468        |
| 1746436697        | 1942        | 1942        | Journey for Margaret            | Journey for Margaret            | Van Dyke, W. S.; Kline, Herbert     | W.S. Van Dyke         | tt0034923        |
| 1746581594        | 1951        | 1951        | The Wild Blue Yonder            | The Wild Blue Yonder            | Dwan, Allan                         | Allan Dwan            | tt0044216        |
| 1746563333        | 1951        | 1951        | Mr. Texas                       | Mr. Texas                       | Ross, Dick                          | Dick Ross             | tt7814732        |
| 1746210718        | 1970        | 1970        | Love Story                      | Love Story                      | Hiller, Arthur                      | Arthur Hiller         | tt0066011        |
| 1746508124        | 1925        | 1925        | Was It Bigamy?                  | Was It Bigamy?                  | Hutchinson, Charles                 | Charles Hutchinson    | tt0016503        |
| 1746514578        | 1916        | 1916        | Her Maternal Right              | Her Maternal Right              | Thornby, Robert; Ince, John         | John Ince             | tt0157747        |
| 1746574162        | 1957        | 1957        | Jailhouse Rock                  | Jailhouse Rock                  | Thorpe, Richard                     | Richard Thorpe        | tt0050556        |
| 1746565202        | 1933        | 1933        | The Son of Kong                 | The Son of Kong                 | Schoedsack, Ernest B.               | Ernest B. Schoedsack  | tt0024593        |
| 1746501308        | 1916        | 1916        | Tempest and Sunshine            | Tempest and Sunshine            | King, Carlton; Hughes, Warren       | Warren Hughes         | tt0159014        |
| 1746585026        | 1940        | 1940        | Dr. Christian Meets the Women   | Dr. Christian Meets the Women   | McGann, William                     | William C. McGann     | tt0032411        |
| 1746585259        | 1930        | 1930        | Trigger Tricks                  | Trigger Tricks                  | Eason, Reaves                       | B. Reeves Eason       | tt0021490        |
| 1746530726        | 1950        | 1950        | Kill or Be Killed               | Kill or Be Killed               | Nosseck, Max                        | Max Nosseck           | tt0042640        |
| 1746574260        | 1963        | 1963        | Mary Mary                       | Mary, Mary                      | LeRoy, Mervyn                       | Mervyn LeRoy          | tt0057293        |
| 1746520927        | 1949        | 1949        | House of Strangers              | House of Strangers              | Mankiewicz, Joseph L.               | Joseph L. Mankiewicz  | tt0041487        |
| 1746571139        | 1935        | 1935        | The Flame Within                | The Flame Within                | Goulding, Edmund                    | Edmund Goulding       | tt0026363        |
| 1746554198        | 1964        | 1964        | The Best Man                    | The Best Man                    | Schaffner, Franklin J.              | Franklin J. Schaffner | tt0057883        |
| 1746514705        | 1915        | 1915        | Aloha Oe                        | Aloha Oe                        | Stanton, Richard; Swickard, Charles | Richard Stanton       | tt0004883        |
| 1746542638        | 1924        | 1924        | The Lure of Love                | The Lure of Love                | Dadmun, Leon E.                     | Leon Danmun           | tt0015098        |
| 1746422226        | 1995        | 1995        | Now and Then                    | Now and Then                    | Glatter, Lesli Linka                | Lesli Linka Glatter   | tt0114011        |
| 1746566859        | 1952        | 1952        | The Captive City                | The Captive City                | Wise, Robert                        | Robert Wise           | tt0044476        |
| 1769970777        | 1912        | 1912        | Yvonne the Foreign Spy          | Yvonne, the Foreign Spy         |                                     |                       | tt1282508        |
| 1746420388        | 1993        | 1992        | Star Time                       | Star Time                       | Cassini, Alexander                  | Alexander Cassini     | tt0105464        |
| 1746500183        | 1945        | 1945        | Youth on Trial                  | Youth on Trial                  | Boetticher, Oscar                   | Budd Boetticher       | tt0038266        |
| 1745272142        | 2000        | 2000        | U-571                           | U 571                           | Mostow, Jonathan                    | Jonathan Mostow       | tt0141926        |
| 1746491808        | 1948        | 1948        | Open Secret                     | Open Secret                     | Reinhardt, John                     | John Reinhardt        | tt0040671        |
| 1746485227        | 1918        | 1918        | The Cruise of the Make-Believes | The Cruise of the Make Believes | Melford, George                     | George Melford        | tt0008981        |
| 1746584229        | 1935        | 1935        | The White Cockatoo              | The White Cockatoo              | Crosland, Alan                      | Alan Crosland         | tt0027207        |
| 1746520051        | 1926        | 1926        | The Dude Cowboy                 | The Dude Cowboy                 | Nelson, Jack                        | Jack Nelson           | tt0016813        |
| 1746532506        | 1922        | 1922        | Gas, Oil and Water              | Gas, Oil and Water              | Ray, Charles                        | Charles Ray           | tt0013165        |
| 1746514210        | 1916        | 1916        | The Unwritten Law               | The Unwritten Law               | Middleton, George E.                | George E. Middleton   | tt0159082        |
| 1746566890        | 1952        | 1952        | Operation Secret                | Operation Secret                | Seiler, Lewis                       | Lewis Seiler          | tt0044999        |
| 1746569868        | 1955        | 1955        | Mister Roberts                  | Mister Roberts                  | Ford, John; LeRoy, Mervyn           | John Ford             | tt0048380        |
| 1746582808        | 1935        | 1935        | Swiftly                         | Swiftly                         | James, Alan                         | Alan James            | tt0028332        |
| 1746580856        | 1938        | 1938        | Judge Hardy's Children          | Judge Hardy's Children          | Seitz, George B.                    | George B. Seitz       | tt0030295        |
| 1745309626        | 2005        | 2005        | A History of Violence           | A History of Violence           | Cronenberg, David                   | David Cronenberg      | tt0399146        |
| 1769971129        | 1969        | 1969        | The Stewardesses                | The Stewardesses                | Silliman, Alf                       | Al Silliman Jr.       | tt0168192        |
| 1746420134        | 1982        | 1982        | Night Shift                     | Night Shift                     | Howard, Ron                         | Ron Howard            | tt0084412        |
| 1746580830        | 1938        | 1938        | My Bill                         | My Bill                         | Farrow, John                        | John Farrow           | tt0030479        |
| 1746569785        | 1955        | 1955        | Tall Man Riding                 | Tall Man Riding                 | Selander, Lesley                    | Lesley Selander       | tt0048690        |
| 1746420970        | 1992        | 1992        | Toys                            | Toys                            | Levinson, Barry                     | Barry Levinson        | tt0105629        |
| <b>1769969569</b> | <b>1912</b> | <b>1912</b> | <b>Into the Desert</b>          | <b>Into the Desert</b>          |                                     | <b>George Nichols</b> | <b>tt0415883</b> |
| 1746475528        | 1946        | 1946        | The Fabulous Suzanne            | The Fabulous Suzanne            | Sekely, Steve                       | Steve Sekely          | tt0038513        |
| 1746567105        | 1933        | 1933        | Midnight Mary                   | Midnight Mary                   | Wellman, William                    | William A. Wellman    | tt0024334        |
| 1746565924        | 1957        | 1957        | The Hellcats of the Navy        | Hellcats of the Navy            | Juran, Nathan                       | Nathan Juran          | tt0050500        |
| 1746574978        | 1934        | 1934        | Black Moon                      | Black Moon                      | Neill, Roy William                  | Roy William Neill     | tt0024895        |

|            |      |      |                                                   |                                                |                                    |                        |           |
|------------|------|------|---------------------------------------------------|------------------------------------------------|------------------------------------|------------------------|-----------|
| 1746555575 | 1955 | 1955 | This Island Earth                                 | This Island Earth                              | Newman, Joseph                     | Joseph M. Newman       | tt0047577 |
| 1746198750 | 1967 | 1967 | The Big Mouth                                     | The Big Mouth                                  | Lewis, Jerry                       | Jerry Lewis            | tt0061401 |
| 1746570060 | 1952 | 1952 | Hellgate                                          | Hellgate                                       | Warren, Charles Marquis            | Charles Marquis Warren | tt0044698 |
| 1746542755 | 1926 | 1926 | Cupid's Knockout                                  | Cupid's Knockout                               | Mitchell, Bruce                    | Bruce Mitchell         | tt0016754 |
| 1746530744 | 1949 | 1949 | Alimony                                           | Alimony                                        | Zeisler, Alfred                    | Alfred Zeisler         | tt0041109 |
| 1746583739 | 1931 | 1931 | The Gang Buster                                   | The Gang Buster                                | Sutherland, A. Edward              | A. Edward Sutherland   | tt0021898 |
| 1746218017 | 1965 | 1965 | Die, Monster, Die!                                | Die, Monster, Die!                             | Haller, Daniel                     | Daniel Haller          | tt0059465 |
| 1746409133 | 1990 | 1990 | Tremors                                           | Tremors                                        | Underwood, Ron                     | Ron Underwood          | tt0100814 |
| 1746507737 | 1924 | 1924 | Miami                                             | Miami                                          | Crosland, Alan                     | Alan Crosland          | tt0015132 |
| 1746464936 | 1944 | 1944 | Wild Horse Phantom                                | Wild Horse Phantom                             | Newfield, Sam                      | Sam Newfield           | tt0037464 |
| 1746465412 | 1944 | 1944 | Girl Rush                                         | Girl Rush                                      | Douglas, Gordon                    | Gordon Douglas         | tt0036865 |
| 1746465154 | 1942 | 1942 | A Gentleman After Dark                            | A Gentleman After Dark                         | Marin, Edwin L.                    | Edwin L. Marin         | tt0034777 |
| 1746199517 | 1966 | 1966 | Blindfold                                         | Blindfold                                      | Dunne, Philip                      | Philip Dunne           | tt0058977 |
| 1746583638 | 1928 | 1928 | The Fearless Rider                                | The Fearless Rider                             | Lewis, Edgar                       | Edgar Lewis            | tt0018880 |
| 1746198509 | 1968 | 1968 | The Hooked Generation                             | The Hooked Generation                          | Grefe, William                     | William Grefé          | tt0063082 |
| 1746585226 | 1929 | 1929 | The Studio Murder Mystery                         | The Studio Murder Mystery                      | Tuttle, Frank                      | Frank Tuttle           | tt0020461 |
| 1746524906 | 1916 | 1916 | Less Than the Dust                                | Less Than the Dust                             | Emerson, John                      | John Emerson           | tt0006914 |
| 1745272360 | 2001 | 2001 | Cats & Dogs                                       | Cats & Dogs                                    | Guterman, Lawrence                 | Lawrence Guterman      | tt0239395 |
| 1745294026 | 2006 | 2005 | American Gun                                      | American Gun                                   | Avelino, Aric                      | Aric Avelino           | tt0416471 |
| 1745373788 | 2003 | 2003 | Wonderland                                        | Wonderland                                     | Cox, James                         | James Cox              | tt0335563 |
| 1746211269 | 1971 | 1971 | Summer of '42                                     | Summer of '42                                  | Mulligan, Robert                   | Robert Mulligan        | tt0067803 |
| 1746576914 | 1951 | 1951 | Nevada Badmen                                     | Nevada Badmen                                  | Collins, Lewis                     | Lewis D. Collins       | tt0043847 |
| 1746542682 | 1949 | 1949 | Song of India                                     | Song of India                                  | Rogell, Albert S.                  | Albert S. Rogell       | tt0041898 |
| 1746582636 | 1938 | 1938 | Bulldog Drummond's Peril                          | Bulldog Drummond's Peril                       | Hogan, James                       | James P. Hogan         | tt0029952 |
| 1746508175 | 1924 | 1924 | The Phantom Horseman                              | The Phantom Horseman                           | Bradbury, Robert North             | Robert N. Bradbury     | tt0015226 |
| 1746561688 | 1965 | 1965 | Wild Seed                                         | Wild Seed                                      | Hutton, Brian G.                   | Brian G. Hutton        | tt0059912 |
| 1746583360 | 1951 | 1951 | Bonanza Town                                      | Bonanza Town                                   | Sears, Fred F.                     | Fred F. Sears          | tt0043353 |
| 1746423502 | 1999 | 1999 | Being John Malkovich                              | Being John Malkovich                           | Jonze, Spike                       | Spike Jonze            | tt0120601 |
| 1746570277 | 1934 | 1934 | The Woman Condemned                               | The Woman Condemned                            | Reid, Wallace                      | Dorothy Davenport      | tt0024782 |
| 1746574062 | 1960 | 1960 | From the Terrace                                  | From the Terrace                               | Robson, Mark                       | Mark Robson            | tt0053841 |
| 1746523293 | 1916 | 1916 | Phantom Fortunes                                  | Phantom Fortunes                               | Scardon, Paul                      | Paul Scardon           | tt0007179 |
| 1746500698 | 1925 | 1925 | Phantom Shadows                                   | Phantom Shadows                                | Grandon, Frank                     | Al Ferguson            | tt0016219 |
| 1746454105 | 1942 | 1942 | The Dawn Express                                  | The Dawn Express                               | Herman, Albert                     | Albert Herman          | tt0034637 |
| 1746520637 | 1949 | 1950 | Woman in Hiding                                   | Woman in Hiding                                | Gordon, Michael                    | Michael Gordon         | tt0042052 |
| 1746513818 | 1923 | 1923 | The Leopardess                                    | The Leopardess                                 | Kolker, Henry                      | Henry Kolker           | tt0014195 |
| 1746583052 | 1935 | 1935 | The Sagebrush Troubadour                          | Sagebrush Troubadour                           | Kane, Joseph                       | Joseph Kane            | tt0026962 |
| 1746235877 | 1973 | 1973 | The Friends of Eddie Coyle                        | The Friends of Eddie Coyle                     | Yates, Peter                       | Peter Yates            | tt0070077 |
| 1746453521 | 1940 | 1940 | The Man Who Wouldn't Talk                         | The Man Who Wouldn't Talk                      | Burton, David                      | David Burton           | tt0032748 |
| 1746464981 | 1945 | 1945 | A Song for Miss Julie                             | A Song for Miss Julie                          | Rowland, William                   | William Rowland        | tt0038099 |
| 1746504582 | 1922 | 1922 | The Power of Love                                 | The Power of Love                              | Deverich, Nat                      | Nat G. Deverich        | tt0013506 |
| 1746474498 | 1944 | 1944 | Storm Over Lisbon                                 | Storm Over Lisbon                              | Sherman, George                    | George Sherman         | tt0037315 |
| 1746424603 | 1941 | 1941 | The Great Swindle                                 | The Great Swindle                              | Collins, Lewis D.                  | Lewis D. Collins       | tt0033679 |
| 1746577978 | 1938 | 1938 | Four Daughters                                    | Four Daughters                                 | Curtiz, Michael                    | Michael Curtiz         | tt0030149 |
| 1746569837 | 1954 | 1954 | Lucky Me                                          | Lucky Me                                       | Donohue, Jack                      | Jack Donohue           | tt0047194 |
| 1746410691 | 1993 | 1992 | Nitrate Kisses                                    | Nitrate Kisses                                 | Hammer, Barbara                    | Barbara Hammer         | tt0107693 |
| 1746492063 | 1945 | 1945 | Black Market Babies                               | Black Market Babies                            | Beaudine, William                  | William Beaudine       | tt0037543 |
| 1746435706 | 1940 | 1940 | The Invisible Woman                               | The Invisible Woman                            | Sutherland, A. Edward              | A. Edward Sutherland   | tt0032637 |
| 1745302610 | 2006 | 2005 | Fuck                                              | Fuck                                           | Anderson, Steve                    | Steve Anderson         | tt0486585 |
| 1746433736 | 1998 | 1997 | Moon over Broadway                                | Moon Over Broadway                             | Hegedus, Chris; Pennebaker, D. A.  | Chris Hegedus          | tt0125412 |
| 1746574575 | 1935 | 1935 | She Married Her Boss                              | She Married Her Boss                           | La Cava, Gregory                   | Gregory La Cava        | tt0026986 |
| 1746198870 | 1965 | 1965 | Indian Paint                                      | Indian Paint                                   | Foster, Norman                     | Norman Foster          | tt0057182 |
| 1746422602 | 1991 | 1991 | Teenage Mutant Ninja Turtles II: The Secret of th | Teenage Mutant Ninja Turtles II: The Secret of | Pressman, Michael                  | Michael Pressman       | tt0103060 |
| 1746504425 | 1921 | 1921 | Home-Keeping Hearts                               | Home Keeping Hearts                            | Ellis, Carlyle                     | Carlyle Ellis          | tt0135451 |
| 1745374468 | 2002 | 2002 | Divine Secrets of the Ya-Ya Sisterhood            | Divine Secrets of the Ya Ya Sisterhood         | Khoury, Callie                     | Callie Khouri          | tt0279778 |
| 1746217975 | 1968 | 1968 | Panic in the City                                 | Panic in the City                              | Davis, Eddie                       | Eddie Davis            | tt0062094 |
| 1746515989 | 1922 | 1922 | The Trouper                                       | The Trouper                                    | Harris, Harry B.                   | Harry B. Harris        | tt0013714 |
| 1769971102 | 1969 | 1969 | Flesh of My Flesh                                 | Flesh of My Flesh                              | Macready, Michael; Kelljan, Robert | Bob Kelljan            | tt0218256 |

|                   |             |             |                               |                               |                                               |                         |                  |
|-------------------|-------------|-------------|-------------------------------|-------------------------------|-----------------------------------------------|-------------------------|------------------|
| 1746508978        | 1925        | 1925        | The Substitute Wife           | The Substitute Wife           | May, Wilfred                                  | Wilfred Noy             | tt0016405        |
| 1746525009        | 1915        | 1915        | The Caprices of Kitty         | The Caprices of Kitty         | Smalley, Phillips                             | Phillips Smalley        | tt0005055        |
| 1746423991        | 1943        | 1943        | Background to Danger          | Background to Danger          | Walsh, Raoul                                  | Raoul Walsh             | tt0035659        |
| 1746497252        | 1918        | 1918        | A Romance of the Underworld   | A Romance of the Underworld   | Kirkwood, James                               | James Kirkwood          | tt0009562        |
| 1746574151        | 1960        | 1960        | The Enemy General             | The Enemy General             | Sherman, George                               | George Sherman          | tt0053795        |
| 1746520616        | 1925        | 1925        | Where Romance Rides           | Where Romance Rides           | Hayes, Ward                                   | Ward Hayes              | tt0179512        |
| 1746433563        | 1997        | 1997        | Eve's Bayou                   | Eve's Bayou                   | Lemmons, Kasi                                 | Kasi Lemmons            | tt0119080        |
| 1746578535        | 1959        | 1959        | The Mating Game               | The Mating Game               | Marshall, George                              | George Marshall         | tt0053054        |
| 1746210072        | 1970        | 1970        | Lovers and Other Strangers    | Lovers and Other Strangers    | Howard, Cy                                    | Cy Howard               | tt0066016        |
| 1746491739        | 1944        | 1944        | Ever Since Venus              | Ever Since Venus              | Dreifuss, Arthur                              | Arthur Dreifuss         | tt0036804        |
| 1746409684        | 1988        | 1988        | Assault of the Killer Bimbos  | Assault of the Killer Bimbos  | Rosenberg, Anita                              | Anita Rosenberg         | tt0092587        |
| 1746515377        | 1920        | 1920        | The Wall Street Mystery       | The Wall Street Mystery       | Collins, Tom                                  | Tom Collins             | tt0011836        |
| 1745342649        | 2008        | 2008        | The Incredible Hulk           | The Incredible Hulk           | Leterrier, Louis                              | Louis Leterrier         | tt0800080        |
| 1746580500        | 1939        | 1939        | Double Deal                   | Double Deal                   | Dreifuss, Arthur                              | Arthur Dreifuss         | tt0031245        |
| 1746566490        | 1932        | 1932        | Make Me a Star                | Make Me a Star                | Beaudine, William                             | William Beaudine        | tt0023175        |
| 1746501997        | 1915        | 1915        | The Outcast                   | The Outcast                   | O'Brien, John B.                              | John B. O'Brien         | tt0005850        |
| 1746566979        | 1932        | 1932        | Thirteen Women                | Thirteen Women                | Archainbaud, George                           | George Archainbaud      | tt0023582        |
| 1746580316        | 1939        | 1939        | The House of Fear             | The House of Fear             | May, Joe                                      | Joe May                 | tt0031449        |
| 1745293417        | 2005        | 2005        | War of the Worlds             | War of the Worlds             | Spielberg, Steven                             | Steven Spielberg        | tt0407304        |
| 1746514709        | 1915        | 1915        | David Harum                   | David Harum                   |                                               | Allan Dwan              | tt0005179        |
| 1746473928        | 1946        | 1946        | The Inner Circle              | The Inner Circle              | Ford, Phil                                    | Philip Ford             | tt0038640        |
| 1746258311        | 1977        | 1977        | The Last Remake of Beau Geste | The Last Remake of Beau Geste | Feldman, Marty                                | Marty Feldman           | tt0076297        |
| 1746496766        | 1917        | 1917        | Susan's Gentleman             | Susan's Gentleman             | Stevens, Edwin                                | Edwin Stevens           | tt0008645        |
| 1746524213        | 1915        | 1915        | The Penitentes                | The Penitentes                | Conway, John                                  | Jack Conway             | tt0005883        |
| 1746516329        | 1920        | 1920        | Double Speed                  | Double Speed                  | Wood, Sam                                     | Sam Wood                | tt0011125        |
| 1746501109        | 1915        | 1915        | The Plunderer                 | The Plunderer                 | Lewis, Edgar                                  | Edgar Lewis             | tt0005905        |
| 1746440183        | 1997        | 1996        | Albino Alligator              | Albino Alligator              | Spacey, Kevin                                 | Kevin Spacey            | tt0115495        |
| 1746393146        | 1987        | 1987        | The Glass Menagerie           | The Glass Menagerie           | Newman, Paul                                  | Paul Newman             | tt0093093        |
| 1746582933        | 1936        | 1936        | The White Angel               | The White Angel               | Dieterle, William                             | William Dieterle        | tt0028499        |
| 1769970684        | 1968        | 1968        | Help Wanted Female            | Help Wanted Female            | Perkins, Harold                               | John Hayes              | tt0063061        |
| <b>1746514872</b> | <b>1916</b> | <b>1916</b> | <b>The Footlights of Fate</b> | <b>The Footlights of Fate</b> | <b>Humphrey, William</b>                      | <b>William Humphrey</b> | <b>tt0156542</b> |
| 1745272367        | 2000        | 2000        | American Psycho               | American Psycho               | Harron, Mary                                  | Mary Harron             | tt0144084        |
| 1746582347        | 1931        | 1931        | Oklahoma Jim                  | Oklahoma Jim                  | Fraser, Harry                                 | Harry L. Fraser         | tt0022218        |
| 1746577146        | 1950        | 1950        | Vigilante Hideout             | Vigilante Hideout             | Brannon, Fred C.                              | Fred C. Brannon         | tt0043106        |
| 1746503248        | 1919        | 1919        | False Gods                    | False Gods                    | Van (pseud. of Wally Van Nostrand), Wally Van | Wally Van               | tt0190392        |
| 1746577542        | 1936        | 1936        | After the Thin Man            | After the Thin Man            | Van Dyke, W. S.                               | W.S. Van Dyke           | tt0027260        |
| 1746436576        | 1940        | 1940        | River's End                   | River's End                   | Enright, Ray                                  | Ray Enright             | tt0034113        |
| 1746520319        | 1949        | 1949        | The Wolf Hunters              | The Wolf Hunters              | Boetticher, Oscar                             | Budd Boetticher         | tt0042050        |
| 1746520060        | 1925        | 1925        | Off the Highway               | Off the Highway               | Forman, Tom                                   | Tom Forman              | tt0016171        |
| 1745396264        | 2008        | 2008        | Frost/Nixon                   | Frost/Nixon                   | Howard, Ron                                   | Ron Howard              | tt0870111        |
| 1746568164        | 1934        | 1934        | Badge of Honor                | Badge of Honor                | Bennet, Spencer Gordon                        | Spencer Gordon Bennet   | tt0024858        |
| 1746555875        | 1954        | 1953        | The Wild One                  | The Wild One                  | Benedek, Laslo                                | Laslo Benedek           | tt0047677        |
| 1746186403        | 1965        | 1965        | Day of the Nightmare          | Day of the Nightmare          | Bushelman, John                               | John A. Bushelman       | tt0059087        |
| 1746503666        | 1920        | 1920        | West Is West                  | West Is Best                  | Paul, Val                                     | Phil Rosen              | tt0222002        |
| 1746562222        | 1954        | 1954        | Riot in Cell Block 11         | Riot in Cell Block 11         | Siegel, Don                                   | Don Siegel              | tt0047417        |
| 1746394427        | 1988        | 1988        | 1969                          | 1969                          | Thompson, Ernest                              | Ernest Thompson         | tt0094594        |
| 1746545415        | 1940        | 1940        | Bullets for Rustlers          | Bullets for Rustlers          | Nelson, Sam                                   | Sam Nelson              | tt0032293        |
| 1746464829        | 1942        | 1942        | Night Monster                 | Night Monster                 | Beebe, Ford                                   | Ford Beebe              | tt0035124        |
| 1746270168        | 1978        | 1978        | Laserblast                    | Laserblast                    | Rae, Michael                                  | Michael Rae             | tt0077834        |
| 1746580323        | 1935        | 1935        | Silk Hat Kid                  | Silk Hat Kid                  | Humberstone, H. Bruce                         | H. Bruce Humberstone    | tt0026998        |
| 1745293432        | 2005        | 2005        | Junebug                       | Junebug                       | Morrison, Phil                                | Phil Morrison           | tt0418773        |
| 1746424459        | 1940        | 1940        | Gambling on the High Seas     | Gambling on the High Seas     | Amy, George                                   | George Amy              | tt0032505        |
| 1745358885        | 2010        | 2010        | Bitter Feast                  | Bitter Feast                  | Maggio, Joe                                   | Joe Maggio              | tt1477835        |
| 1746576939        | 1959        | 1959        | Hound-Dog Man                 | Hound Dog Man                 | Siegel, Don                                   | Don Siegel              | tt0052906        |
| 1769976183        | 1920        | 1919        | Fireman, Save My Gal          | Fireman, Save My Gal!         | Hutchinson, Craig                             | Craig Hutchinson        | tt0450674        |
| 1746584200        | 1940        | 1940        | The Notorious Elinor Lee      | The Notorious Elinor Lee      | Micheaux, Oscar                               | Oscar Micheaux          | tt0139504        |
| 1746562134        | 1953        | 1953        | Flight to Tangier             | Flight to Tangier             | Warren, Charles Marquis                       | Charles Marquis Warren  | tt0045774        |

|            |      |      |                            |                            |                                |                      |           |
|------------|------|------|----------------------------|----------------------------|--------------------------------|----------------------|-----------|
| 1746453649 | 1942 | 1942 | So's Your Aunt Emma        | So's Your Aunt Emmal       | Yarbrough, Jean                | Jean Yarbrough       | tt0035051 |
| 1746582542 | 1935 | 1935 | Rainbow's End              | Rainbow's End              | Spencer, Norval                | Norval Spencer       | tt0026909 |
| 1746199055 | 1969 | 1969 | Futz                       | Futz                       | O'Horgan, Tom                  | Tom O'Horgan         | tt0064354 |
| 1746475981 | 1947 | 1947 | Web of Danger              | Web of Danger              | Ford, Philip                   | Philip Ford          | tt0039972 |
| 1746436684 | 1940 | 1940 | Hit Parade of 1941         | Hit Parade of 1941         | Auer, John H.                  | John H. Auer         | tt0032600 |
| 1746475758 | 1944 | 1944 | Cover Girl                 | Cover Girl                 | Vidor, Charles                 | Charles Vidor        | tt0036723 |
| 1746562326 | 1956 | 1955 | The Last Frontier          | The Last Frontier          | Mann, Anthony                  | Anthony Mann         | tt0049431 |
| 1746573666 | 1932 | 1932 | 20,000 Years in Sing Sing  | 20,000 Years in Sing Sing  | Curtiz, Michael                | Michael Curtiz       | tt0023731 |
| 1746520736 | 1925 | 1925 | Wasted Lives               | Wasted Lives               | Gorman, John                   | John Gorman          | tt0016504 |
| 1746208112 | 1968 | 1968 | Don't Just Stand There!    | Don't Just Stand There     | Winston, Ron                   | Ron Winston          | tt0062901 |
| 1746393738 | 1987 | 1987 | Eddie Murphy Raw           | Eddie Murphy: Raw          | Townsend, Robert               | Robert Townsend      | tt0092948 |
| 1745372540 | 2002 | 2002 | Mr. Deeds                  | Mr. Deeds                  | Brill, Steven                  | Steven Brill         | tt0280590 |
| 1746410657 | 1992 | 1992 | My Cousin Vinny            | My Cousin Vinny            | Lynn, Jonathan                 | Jonathan Lynn        | tt0104952 |
| 1746580336 | 1938 | 1938 | Bluebeard's Eighth Wife    | Bluebeard's Eighth Wife    | Lubitsch, Ernst                | Ernst Lubitsch       | tt0029929 |
| 1746584691 | 1930 | 1930 | Spring Is Here             | Spring Is Here             | Dillon, John Francis           | John Francis Dillon  | tt0021413 |
| 1746420110 | 1981 | 1981 | Under the Rainbow          | Under the Rainbow          | Rash, Steve                    | Steve Rash           | tt0083254 |
| 1746572033 | 1932 | 1932 | Mr. Robinson Crusoe        | Mr. Robinson Crusoe        | Sutherland, Edward             | A. Edward Sutherland | tt0023243 |
| 1746210258 | 1970 | 1970 | I Never Sang for My Father | I Never Sang for My Father | Cates, Gilbert                 | Gilbert Cates        | tt0065872 |
| 1746578028 | 1935 | 1935 | Top Hat                    | Top Hat                    | Sandrich, Mark                 | Mark Sandrich        | tt0027125 |
| 1746566631 | 1932 | 1932 | Attorney for the Defense   | Attorney for the Defense   | Cummings, Irving               | Irving Cummings      | tt0022644 |
| 1746210772 | 1973 | 1973 | Jeremy                     | Jeremy                     | Barron, Arthur                 | Arthur Barron        | tt0070238 |
| 1746393095 | 1988 | 1988 | Ghost Town                 | Ghost Town                 | Governor, Richard              | Richard McCarthy     | tt0095215 |
| 1746570106 | 1934 | 1934 | Ridin' Thru                | Ridin' Thru                | Samuels, Henri                 | Harry S. Webb        | tt0025719 |
| 1746436379 | 1943 | 1943 | False Faces                | False Faces                | Sherman, George                | George Sherman       | tt0035863 |
| 1746503908 | 1922 | 1922 | Man's Law and God's        | Man's Law and God's        | Fox, Finis                     | Finis Fox            | tt0333865 |
| 1746409710 | 1990 | 1990 | Darkman                    | Darkman                    | Raimi, Sam                     | Sam Raimi            | tt0099365 |
| 1746486163 | 1919 | 1919 | The Man Who Stayed at Home | The Man Who Stayed at Home | Blaché, Herbert                | Herbert Blaché       | tt0010421 |
| 1746525073 | 1920 | 1920 | Women Men Forget           | Women Men Forget           | Stahl, John M.                 | John M. Stahl        | tt0011879 |
| 1769971169 | 1969 | 1969 | Pieces                     | Pieces                     |                                |                      | tt0254690 |
| 1746409995 | 1985 | 1985 | Runaway Train              | Runaway Train              | Konchalovsky, Andrei           | Andrei Konchalovskiy | tt0089941 |
| 1746439118 | 1997 | 1997 | Fierce Creatures           | Fierce Creatures           | Young, Robert; Schepisi, Fred  | Fred Schepisi        | tt0119115 |
| 1745302649 | 2007 | 2007 | Redline                    | Redline                    | Cheng, Andy                    | Andy Cheng           | tt0780595 |
| 1746570217 | 1933 | 1933 | Ladies Must Love           | Ladies Must Love           | Dupont, E. A.                  | Ewald André Dupont   | tt0024237 |
| 1746508417 | 1925 | 1925 | Clothes Make the Pirate    | Clothes Make the Pirate    | Tourneur, Maurice              | Maurice Tourneur     | tt0015689 |
| 1746465386 | 1942 | 1942 | I Married an Angel         | I Married an Angel         | Van Dyke, W. S.; Del Ruth, Roy | W.S. Van Dyke        | tt0034882 |
| 1746567345 | 1932 | 1932 | Doomed Battalion           | The Doomed Battalion       | Gardner, Cyril                 | Cyril Gardner        | tt0022831 |
| 1746569834 | 1957 | 1957 | Ride Out for Revenge       | Ride Out for Revenge       | Girard, Bernard                | Bernard Girard       | tt0050900 |
| 1746569768 | 1955 | 1955 | Pete Kelly's Blues         | Pete Kelly's Blues         | Webb, Jack                     | Jack Webb            | tt0048484 |
| 1746423572 | 1990 | 1990 | Repossessed                | Repossessed                | Logan, Bob                     | Bob Logan            | tt0100475 |
| 1746577757 | 1933 | 1933 | Bureau of Missing Persons  | Bureau of Missing Persons  | Del Ruth, Roy                  | Roy Del Ruth         | tt0023856 |
| 1745302477 | 2006 | 2006 | United 93                  | United 93                  | Greengrass, Paul               | Paul Greengrass      | tt0475276 |
| 1746562363 | 1953 | 1953 | The Glass Web              | The Glass Web              | Arnold, Jack                   | Jack Arnold          | tt0045825 |
| 1746523965 | 1916 | 1916 | The Fugitive               | The Fugitive               | Sullivan, Frederick            | Frederick Sullivan   | tt0162337 |
| 1745293461 | 2005 | 2004 | Million Dollar Baby        | Million Dollar Baby        | Eastwood, Clint                | Clint Eastwood       | tt0405159 |
| 1746574105 | 1957 | 1957 | The Delicate Delinquent    | The Delicate Delinquent    | McGuire, Don; Lewis, Jerry     | Don McGuire          | tt0050301 |
| 1746475543 | 1947 | 1947 | Where the North Begins     | Where the North Begins     | Bretherton, Howard             | Howard Bretherton    | tt0039983 |
| 1745374030 | 2002 | 2002 | Moonlight Mile             | Moonlight Mile             | Silberling, Brad               | Brad Silberling      | tt0179098 |
| 1746454085 | 1944 | 1944 | Alaska                     | Alaska                     | Archainbaud, George            | George Archainbaud   | tt0036590 |
| 1746577575 | 1937 | 1937 | Outlaws of the Prairie     | Outlaws of the Prairie     | Nelson, Sam                    | Sam Nelson           | tt0030539 |
| 1746532732 | 1923 | 1923 | Temptation                 | Temptation                 | Le Saint, Edward J.            | Edward LeSaint       | tt0014530 |
| 1746394528 | 1988 | 1988 | The Great Outdoors         | The Great Outdoors         | Deutch, Howard                 | Howard Deutch        | tt0095253 |
| 1769974393 | 1916 | 1916 | Stronger Than Woman's Will | Stronger Than Woman's Will |                                | J. Farrell MacDonald | tt0797935 |
| 1746503578 | 1922 | 1922 | Head over Heels            | Head Over Heels            | Schertzing, Victor; Bern, Paul | Paul Bern            | tt0013221 |
| 1746502277 | 1916 | 1916 | The Chaperon               | The Chaperon               | Berthelet, Arthur              | Arthur Berthelet     | tt0157455 |
| 1746436896 | 2000 | 2000 | Drowning Mona              | Drowning Mona              | Gomez, Nick                    | Nick Gomez           | tt0186045 |
| 1746567787 | 1933 | 1933 | Walls of Gold              | Walls of Gold              | MacKenna, Kenneth              | Kenneth MacKenna     | tt0024745 |
| 1746565996 | 1954 | 1954 | Phantom Stallion           | Phantom Stallion           | Keller, Harry                  | Harry Keller         | tt0047345 |

|            |      |      |                                        |                                        |                                   |                      |           |
|------------|------|------|----------------------------------------|----------------------------------------|-----------------------------------|----------------------|-----------|
| 1746569603 | 1956 | 1956 | Pillars of the Sky                     | Pillars of the Sky                     | Marshall, George                  | George Marshall      | tt0049619 |
| 1746499868 | 1945 | 1945 | San Pietro                             | San Pietro                             | Huston, John                      | John Huston          | tt0036630 |
| 1746578009 | 1938 | 1938 | Gold Mine in the Sky                   | Gold Mine in the Sky                   | Kane, Joe                         | Joseph Kane          | tt0030193 |
| 1746576843 | 1931 | 1931 | Once a Lady                            | Once a Lady                            | McClintic, Guthrie                | Guthrie McClintic    | tt0022226 |
| 1746524223 | 1916 | 1916 | The Man Who Stood Still                | The Man Who Stood Still                | Crane, Frank                      | Frank Hall Crane     | tt0007017 |
| 1746208684 | 1969 | 1969 | Pendulum                               | Pendulum                               | Schaefer, George                  | George Schaefer      | tt0064797 |
| 1746421264 | 1995 | 1995 | Cutthroat Island                       | Cutthroat Island                       | Harlin, Renny                     | Renny Harlin         | tt0112760 |
| 1745393720 | 2009 | 2009 | Dance Flick                            | Dance Flick                            | Wayans, Damien Dante              | Damien Dante Wayans  | tt1153706 |
| 1746454640 | 1942 | 1942 | You Were Never Lovelier                | You Were Never Lovelier                | Seiter, William A.                | William A. Seiter    | tt0035583 |
| 1746575984 | 1910 | 1910 | The Cowboy's Sweetheart and the Bandit | The Cowboy's Sweetheart and the Bandit |                                   | Theodore Wharton     | tt1227834 |
| 1746569859 | 1960 | 1960 | Pollyanna                              | Pollyanna                              | Swift, David                      | David Swift          | tt0054195 |
| 1746497491 | 1920 | 1920 | The Brute Master                       | The Brute Master                       | Marshall, Roy H.                  | Roy Marshall         | tt0012010 |
| 1746492456 | 1947 | 1947 | The Homestretch                        | The Homestretch                        | Humberstone, Bruce                | H. Bruce Humberstone | tt0039471 |
| 1746562369 | 1953 | 1953 | I, the Jury                            | I, the Jury                            | Essex, Harry                      | Harry Essex          | tt0045902 |
| 1746520187 | 1924 | 1924 | His Darker Self                        | His Darker Self                        | Noble, John W.                    | John W. Noble        | tt0014989 |
| 1745357924 | 2002 | 2002 | Enough                                 | Enough                                 | Apted, Michael                    | Michael Apted        | tt0278435 |
| 1746515031 | 1915 | 1915 | Niobe                                  | Niobe                                  | Ford, Hugh; Porter, Edwin S.      | Hugh Ford            | tt0005814 |
| 1746524670 | 1917 | 1917 | The Great Bradley Mystery              | The Great Bradley Mystery              | Ridgely, Richard                  | Richard Ridgely      | tt0175683 |
| 1745393832 | 2010 | 2010 | Diary of a Wimpy Kid                   | Diary of a Wimpy Kid                   | Freudenthal, Thor                 | Thor Freudenthal     | tt1196141 |
| 1745373494 | 2009 | 2008 | Explicit Ills                          | Explicit Ills                          | Webber, Mark                      | Mark Webber          | tt1095001 |
| 1746584247 | 1937 | 1937 | Danger Patrol                          | Danger Patrol                          | Landers, Lew                      | Lew Landers          | tt0028759 |
| 1746503469 | 1921 | 1921 | After Midnight                         | After Midnight                         | Ince, Ralph                       | Ralph Ince           | tt0011910 |
| 1746513717 | 1916 | 1916 | The Sphinx                             | The Sphinx                             | Adolfi, Jack                      | John G. Adolfi       | tt0007382 |
| 1746542624 | 1924 | 1924 | Jack o' Clubs                          | Jack O'Clubs                           | Hill, Robert F.                   | Robert F. Hill       | tt0015020 |
| 1746509547 | 1949 | 1948 | The Judge Steps Out                    | The Judge Steps Out                    | Ingster, Boris                    | Boris Ingster        | tt0041531 |
| 1746235332 | 1972 | 1972 | Come Back Charleston Blue              | Come Back Charleston Blue              | Warren, Mark                      | Mark Warren          | tt0068403 |
| 1746257758 | 1978 | 1978 | Gray Lady Down                         | Gray Lady Down                         | Greene, David                     | David Greene         | tt0077629 |
| 1746573843 | 1956 | 1956 | Man Beast                              | Man Beast                              | Warren, Jerry                     | Jerry Warren         | tt0049468 |
| 1745340013 | 2001 | 2001 | Glitter                                | Glitter                                | Hall, Vondie Curtis               | Vondie Curtis        | tt0118589 |
| 1746453845 | 1941 | 1941 | I'll Wait for You                      | I'll Wait for You                      | Sinclair, Robert B.               | Robert B. Sinclair   | tt0033748 |
| 1746584487 | 1929 | 1929 | Desert Nights                          | Desert Nights                          | Nigh, William                     | William Nigh         | tt0019811 |
| 1746584054 | 1939 | 1939 | Range War                              | Range War                              | Selander, Lesley                  | Lesley Selander      | tt0031838 |
| 1746580273 | 1939 | 1939 | Mr. Moto Takes a Vacation              | Mr. Moto Takes a Vacation              | Foster, Norman                    | Norman Foster        | tt0031676 |
| 1746574348 | 1958 | 1958 | Summer Love                            | Summer Love                            | Haas, Charles                     | Charles F. Haas      | tt0052258 |
| 1746573075 | 1931 | 1931 | Man of the World                       | Man of the World                       | Wallace, Richard                  | Richard Wallace      | tt0022119 |
| 1746554758 | 1964 | 1964 | I'd Rather Be Rich                     | I'd Rather Be Rich                     | Smight, Jack                      | Jack Smight          | tt0058222 |
| 1746408460 | 1992 | 1992 | The Player                             | The Player                             | Altman, Robert                    | Robert Altman        | tt0105151 |
| 1746394706 | 1985 | 1985 | The New Kids                           | The New Kids                           | Cunningham, Sean S.               | Sean S. Cunningham   | tt0089679 |
| 1746584397 | 1937 | 1937 | San Quentin                            | San Quentin                            | Bacon, Lloyd                      | Lloyd Bacon          | tt0029511 |
| 1745359125 | 2004 | 2004 | Torque                                 | Torque                                 | Kahn, Joseph                      | Joseph Kahn          | tt0329691 |
| 1746567344 | 1933 | 1933 | Sagebrush Trail                        | Sagebrush Trail                        | Schaefer, Armand                  | Armand Schaefer      | tt0024516 |
| 1746436262 | 1999 | 1999 | The Blair Witch Project                | The Blair Witch Project                | Myrick, Daniel ; Sanchez, Eduardo | Daniel Myrick        | tt0185937 |
| 1746520215 | 1948 | 1948 | Gunning for Justice                    | Gunning for Justice                    | Taylor, Ray                       | Ray Taylor           | tt0040410 |
| 1746509026 | 1923 | 1923 | In the West                            | In the West                            | Holt, George                      | George Holt          | tt0124753 |
| 1746576865 | 1932 | 1932 | The Man from Hell's Edges              | The Man from Hell's Edges              | Bradbury, Robert N.               | Robert N. Bradbury   | tt0023183 |
| 1746501038 | 1910 | 1910 | The Princess and the Peasant           | The Princess and the Peasant           | Dawley, J. Searle                 | J. Searle Dawley     | tt0001368 |
| 1746454299 | 1944 | 1944 | Gypsy Wildcat                          | Gypsy Wildcat                          | Neill, Roy William                | Roy William Neill    | tt0036890 |
| 1745358586 | 2002 | 2001 | Thirteen Conversations About One Thing | Thirteen Conversations About One Thing | Sprecher, Jill                    | Jill Sprecher        | tt0268690 |
| 1746497682 | 1919 | 1919 | Her Code of Honor                      | Her Code of Honor                      | Stahl, John M.                    | John M. Stahl        | tt0010238 |
| 1746393112 | 1987 | 1987 | The Hanoi Hilton                       | The Hanoi Hilton                       | Chetwynd, Lionel                  | Lionel Chetwynd      | tt0093143 |
| 1746439147 | 1943 | 1943 | Gangway for Tomorrow                   | Gangway for Tomorrow                   | Auer, John H.                     | John H. Auer         | tt0035917 |
| 1746509064 | 1950 | 1950 | Gunslingers                            | Gunslingers                            | Fox, Wallace W.                   | Wallace Fox          | tt0042535 |
| 1746555786 | 1955 | 1955 | Chief Crazy Horse                      | Chief Crazy Horse                      | Sherman, George                   | George Sherman       | tt0047935 |
| 1746556005 | 1954 | 1954 | Return from the Sea                    | Return from the Sea                    | Selander, Lesley                  | Lesley Selander      | tt0047405 |
| 1746235064 | 1975 | 1975 | Shampoo                                | Shampoo                                | Ashby, Hal                        | Hal Ashby            | tt0073692 |
| 1746578006 | 1939 | 1939 | Calling All Marines                    | Calling All Marines                    | Auer, John H.                     | John H. Auer         | tt0031132 |
| 1746487574 | 1920 | 1920 | Captain Swift                          | Captain Swift                          | Terriss, Tom                      | Tom Terriss          | tt0188481 |

|            |      |      |                                  |                                  |                               |                      |           |
|------------|------|------|----------------------------------|----------------------------------|-------------------------------|----------------------|-----------|
| 1746208866 | 1967 | 1967 | Jack of Diamonds                 | Jack of Diamonds                 | Taylor, Don                   | Don Taylor           | tt0061831 |
| 1746564272 | 1953 | 1953 | The Clown                        | The Clown                        | Leonard, Robert Z.            | Robert Z. Leonard    | tt0044503 |
| 1746508961 | 1949 | 1949 | Home in San Antone               | Home in San Antone               | Nazarro, Ray                  | Ray Nazarro          | tt0041480 |
| 1746491892 | 1947 | 1947 | The Exile                        | The Exile                        | Opuls, Max                    | Max Ophüls           | tt0039360 |
| 1746576256 | 1932 | 1932 | Broken Lullaby                   | Broken Lullaby                   | Lubitsch, Ernst               | Ernst Lubitsch       | tt0022725 |
| 1769971180 | 1969 | 1969 | Animal Love                      | Animal Love                      | Kenny                         | Kenny                | tt0210512 |
| 1746555523 | 1954 | 1954 | Loophole                         | Loophole                         | Schuster, Harold              | Harold D. Schuster   | tt0047192 |
| 1746542712 | 1925 | 1925 | Adventure                        | Adventure                        | Fleming, Victor               | Victor Fleming       | tt0015542 |
| 1746520940 | 1950 | 1950 | The Asphalt Jungle               | The Asphalt Jungle               | Huston, John                  | John Huston          | tt0042208 |
| 1746492428 | 1948 | 1948 | The Miracle of the Bells         | The Miracle of the Bells         | Pichel, Irving                | Irving Pichel        | tt0040594 |
| 1746235905 | 1975 | 1975 | Mandingo                         | Mandingo                         | Fleischer, Richard            | Richard Fleischer    | tt0073349 |
| 1746492417 | 1944 | 1944 | A Night of Adventure             | A Night of Adventure             | Douglas, Gordon               | Gordon Douglas       | tt0037130 |
| 1746569916 | 1959 | 1959 | The Beat Generation              | The Beat Generation              | Haas, Charles                 | Charles F. Haas      | tt0052610 |
| 1746393991 | 1989 | 1989 | Eat a Bowl of Tea                | Eat a Bowl of Tea                | Wang, Wayne                   | Wayne Wang           | tt0097261 |
| 1746577578 | 1938 | 1938 | Crime School                     | Crime School                     | Seiler, Lewis                 | Lewis Seiler         | tt0030026 |
| 1745340323 | 2004 | 2004 | Taking Lives                     | Taking Lives                     | Caruso, D. J.                 | D.J. Caruso          | tt0364045 |
| 1746500635 | 1924 | 1924 | Riding Double                    | Riding Double                    | Maloney, Leo                  | Leo D. Maloney       | tt0015280 |
| 1746454874 | 1999 | 1998 | The Adventures of Sebastian Cole | The Adventures of Sebastian Cole | Williams, Tod                 | Tod Williams         | tt0168449 |
| 1746583678 | 1929 | 1929 | The Arizona Kid                  | The Arizona Kid                  | Carpenter, Horace B.          | Horace B. Carpenter  | tt0019648 |
| 1746561915 | 1955 | 1955 | Cell 2455, Death Row             | Cell 2455, Death Row             | Sears, Fred F.                | Fred F. Sears        | tt0047926 |
| 1746569550 | 1954 | 1954 | Cattle Queen of Montana          | Cattle Queen of Montana          | Dwan, Allan                   | Allan Dwan           | tt0046839 |
| 1745342247 | 2004 | 2003 | Open Water                       | Open Water                       | Kentis, Chris                 | Chris Kentis         | tt0374102 |
| 1746566920 | 1953 | 1953 | Perils of the Jungle             | Perils of the Jungle             | Blair, George                 | George Blair         | tt0046179 |
| 1746419173 | 1994 | 1994 | A Low Down Dirty Shame           | A Low Down Dirty Shame           | Wayans, Keenen Ivory          | Keenen Ivory Wayans  | tt0110399 |
| 1746502865 | 1916 | 1916 | Sherlock Holmes                  | Sherlock Holmes                  | Berthelet, Arthur             | Arthur Berthelet     | tt0007338 |
| 1746580479 | 1936 | 1936 | China Clipper                    | China Clipper                    | Enright, Ray                  | Ray Enright          | tt0027445 |
| 1746524922 | 1915 | 1915 | The Golden Claw                  | The Golden Claw                  | Barker, Reginald              | Reginald Barker      | tt0005403 |
| 1746585151 | 1930 | 1930 | One Romantic Night               | One Romantic Night               | Stein, Paul L.                | Paul L. Stein        | tt0021217 |
| 1746393285 | 1984 | 1984 | Repo Man                         | Repo Man                         | Cox, Alex                     | Alex Cox             | tt0087995 |
| 1746520468 | 1926 | 1926 | The Gentle Cyclone               | The Gentle Cyclone               | Van Dyke, William S.          | W.S. Van Dyke        | tt0016916 |
| 1746454376 | 1940 | 1940 | Forty Little Mothers             | Forty Little Mothers             | Berkeley, Busby               | Busby Berkeley       | tt0032487 |
| 1746523585 | 1915 | 1915 | Should a Wife Forgive?           | Should a Wife Forgive?           | King, Henry                   | Henry King           | tt0006039 |
| 1746523354 | 1916 | 1916 | The Serpent                      | The Serpent                      | Walsh, Raoul A.               | Raoul Walsh          | tt0007325 |
| 1746520272 | 1925 | 1925 | Infatuation                      | Infatuation                      | Cummings, Irving              | Irving Cummings      | tt0015946 |
| 1746467623 | 1917 | 1918 | Hands Up!                        | Hands Up!                        | Browning, Tod; Lucas, Wilfred | Louis J. Gasnier     | tt0022128 |
| 1746454632 | 1945 | 1945 | The Topeka Terror                | The Topeka Terror                | Bretherton, Howard            | Howard Bretherton    | tt0038181 |
| 1746570037 | 1933 | 1933 | Heroes for Sale                  | Heroes for Sale                  | Wellman, William A.           | William A. Wellman   | tt0024115 |
| 1746580632 | 1937 | 1937 | Paid to Dance                    | Paid to Dance                    | Coleman, C. C.                | Charles C. Coleman   | tt0029366 |
| 1746515050 | 1916 | 1916 | The Conquest of Canaan           | The Conquest of Canaan           | Irving, George                | George Irving        | tt0157479 |
| 1746579018 | 1962 | 1961 | Madison Avenue                   | Madison Avenue                   | Humberstone, Bruce            | H. Bruce Humberstone | tt0056209 |
| 1746500475 | 1924 | 1924 | Let Not Man Put Asunder          | Let Not Man Put Asunder          | Blackton, J. Stuart           | J. Stuart Blackton   | tt0015062 |
| 1746495589 | 1917 | 1917 | A Sleeping Memory                | A Sleeping Memory                | Baker, George D.              | George D. Baker      | tt0182428 |
| 1746514493 | 1923 | 1923 | Robin Hood, Jr.                  | Robin Hood, Jr.                  | Bricker, Clarence             | Clarence Bricker     | tt0014411 |
| 1746578821 | 1951 | 1951 | Air Cadet                        | Air Cadet                        | Pevney, Joseph                | Joseph Pevney        | tt0043270 |
| 1746583310 | 1951 | 1951 | Heart of the Rockies             | Heart of the Rockies             | Witney, William               | William Witney       | tt0043626 |
| 1746492710 | 1944 | 1944 | Ali Baba and the Forty Thieves   | Ali Baba and the Forty Thieves   | Lubin, Arthur                 | Arthur Lubin         | tt0036591 |
| 1746582427 | 1935 | 1935 | A Tale of Two Cities             | A Tale of Two Cities             | Conway, Jack                  | Jack Conway          | tt0027075 |
| 1746503035 | 1923 | 1923 | The Empty Cradle                 | The Empty Cradle                 | King, Burton                  | Burton L. King       | tt0014017 |
| 1746424607 | 1941 | 1941 | Dangerous Lady                   | Dangerous Lady                   | Ray, Bernard B.               | Bernard B. Ray       | tt0033510 |
| 1746524091 | 1923 | 1923 | Playing Double                   | Playing Double                   |                               | Dick Rush            | tt038347  |
| 1769970773 | 1912 | 1912 | White Aprons                     | The White Aprons                 |                               | Étienne Arnaud       | tt0002580 |
| 1746504144 | 1919 | 1919 | The Brute Breaker                | The Brute Breaker                | Reynolds, Lynn F.             | Lynn Reynolds        | tt0009972 |
| 1746582274 | 1951 | 1951 | The Magic Face                   | The Magic Face                   | Tuttle, Frank                 | Frank Tuttle         | tt0043771 |
| 1746569526 | 1955 | 1955 | The Tall Men                     | The Tall Men                     | Walsh, Raoul                  | Raoul Walsh          | tt0048691 |
| 1746570191 | 1952 | 1952 | Tembo                            | Tembo                            | Hill, Howard                  | Howard Hill          | tt0238655 |
| 1746582627 | 1937 | 1936 | Great Guy                        | Great Guy                        | Blystone, John G.             | John G. Blystone     | tt0027697 |
| 1746578520 | 1951 | 1951 | Kind Lady                        | Kind Lady                        | Sturges, John                 | John Sturges         | tt0043709 |

|                   |             |             |                                                  |                                               |                        |                                            |                  |
|-------------------|-------------|-------------|--------------------------------------------------|-----------------------------------------------|------------------------|--------------------------------------------|------------------|
| 1746554553        | 1964        | 1964        | Becket                                           | Becket                                        | Glenville, Peter       | Peter Glenville                            | tt0057877        |
| 1746504429        | 1920        | 1920        | The Midnight Bride                               | The Midnight Bride                            | Humphrey, William J.   | William Humphrey                           | tt0011461        |
| 1746500573        | 1926        | 1926        | The Cave Man                                     | The Caveman                                   | Milestone, Lewis       | Lewis Milestone                            | tt0016716        |
| 1746454621        | 1941        | 1941        | A Missouri Outlaw                                | A Missouri Outlaw                             | Sherman, George        | George Sherman                             | tt0035071        |
| 1746409701        | 1986        | 1986        | Desert Bloom                                     | Desert Bloom                                  | Corr, Eugene           | Eugene Corr                                | tt0090934        |
| 1746532435        | 1928        | 1928        | Making the Varsity                               | Making the Varsity                            | Wheeler, Cliff         | Cliff Wheeler                              | tt0132297        |
| 1746553831        | 1964        | 1964        | A Global Affair                                  | A Global Affair                               | Arnold, Jack           | Jack Arnold                                | tt0058145        |
| 1746491969        | 1943        | 1943        | The Stranger from Pecos                          | The Stranger from Pecos                       | Hillyer, Lambert       | Lambert Hillyer                            | tt0036394        |
| 1746562181        | 1954        | 1954        | Thunder Pass                                     | Thunder Pass                                  | McDonald, Frank        | Frank McDonald                             | tt0047584        |
| 1746435216        | 1941        | 1941        | They Dare Not Love                               | They Dare Not Love                            | Whale, James           | James Whale                                | tt0034276        |
| 1746574808        | 1934        | 1934        | We're Rich Again                                 | We're Rich Again                              | Seiter, William A.     | William A. Seiter                          | tt0025966        |
| 1746523557        | 1916        | 1916        | Tangled Fates                                    | Tangled Fates                                 | Vale, Travers          | Travers Vale                               | tt0007426        |
| 1746491708        | 1948        | 1948        | The Noose Hangs High                             | The Noose Hangs High                          | Barton, Charles        | Charles Barton                             | tt0040652        |
| 1746436373        | 1942        | 1942        | Timber                                           | Timber!                                       | Cabanne, Christy       | Christy Cabanne                            | tt0035442        |
| 1769969480        | 1965        | 1965        | Freudus Sexualis                                 | Freudus Sexualis                              | Starkey, William H.    | William H. Starkey                         | tt0218981        |
| 1746584889        | 1940        | 1940        | Flowing Gold                                     | Flowing Gold                                  | Green, Alfred E.       | Alfred E. Green                            | tt0032481        |
| 1746542660        | 1949        | 1949        | The Wyoming Bandit                               | The Wyoming Bandit                            | Ford, Philip           | Philip Ford                                | tt0042055        |
| 1746523295        | 1923        | 1923        | Smilin' On                                       | Smilin' On                                    | Craft, William J.      | William James Craft                        | tt0340360        |
| 1746500289        | 1925        | 1925        | The Re-creation of Brian Kent                    | The Re Creation of Brian Kent                 | Wood, Sam; Weil, Harry | Sam Wood                                   | tt0016270        |
| 1745339953        | 2003        | 2003        | Mayor of the Sunset Strip                        | Mayor of the Sunset Strip                     | Hickenlooper, George   | George Hickenlooper                        | tt0230512        |
| 1746455292        | 1997        | 1997        | The Edge                                         | The Edge                                      | Tamahori, Lee          | Lee Tamahori                               | tt0119051        |
| 1746465356        | 1941        | 1940        | Second Chorus                                    | Second Chorus                                 | Potter, H. C.          | H.C. Potter                                | tt0033029        |
| 1745340463        | 2002        | 2001        | Wendigo                                          | Wendigo                                       |                        | Larry Fessenden                            | tt0275067        |
| 1746409704        | 1983        | 1983        | Sudden Impact                                    | Sudden Impact                                 | Eastwood, Clint        | Clint Eastwood                             | tt0086383        |
| 1746574469        | 1934        | 1934        | She Loves Me Not                                 | She Loves Me Not                              | Nugent, Elliott        | Elliott Nugent                             | tt0025774        |
| 1745357965        | 2004        | 2004        | Spartan                                          | Spartan                                       | Mamet, David           | David Mamet                                | tt0360009        |
| 1746508437        | 1923        | 1923        | High Speed Lee                                   | High Speed Lee                                | Murphy, Dudley         | Dudley Murphy                              | tt0329181        |
| 1746409674        | 1984        | 1984        | Places in the Heart                              | Places in the Heart                           | Benton, Robert         | Robert Benton                              | tt0087921        |
| 1746572545        | 1931        | 1931        | Son of India                                     | Son of India                                  | Feyder, Jacques        | Jacques Feyder                             | tt0022412        |
| 1746516270        | 1921        | 1921        | Flowing Gold                                     | Flowing Gold                                  | Franchon, Leonard      | Leonard Franchon                           | tt0325396        |
| 1746567585        | 1952        | 1952        | My Wife's Best Friend                            | My Wife's Best Friend                         | Sale, Richard          | Richard Sale                               | tt0044942        |
| 1746436566        | 1941        | 1941        | The Bandit Trail                                 | The Bandit Trail                              | Killy, Edward          | Edward Killy                               | tt0033375        |
| 1769971980        | 1969        | 1969        | Marcy                                            | Marcy                                         | Sarno, Joseph W.       | Joseph W. Sarno                            | tt0064637        |
| 1746578067        | 1939        | 1939        | Gunga Din                                        | Gunga Din                                     | Stevens, George        | George Stevens                             | tt0031398        |
| 1746516353        | 1920        | 1920        | Black Is White                                   | Black Is White                                | Giblyn, Charles        | Charles Giblyn                             | tt0010995        |
| 1746566035        | 1955        | 1955        | Ma and Pa Kettle at Waikiki                      | Ma and Pa Kettle at Waikiki                   | Sholem, Lee            | Lee Sholem                                 | tt0048328        |
| 1746570839        | 1934        | 1934        | The Painted Veil                                 | The Painted Veil                              | Boleslawski, Richard   | Richard Boleslawski                        | tt0025617        |
| 1746565902        | 1953        | 1953        | Loose in London                                  | Loose in London                               | Bernds, Edward         | Edward Berndts                             | tt0046011        |
| 1746487725        | 1921        | 1921        | Marry the Poor Girl                              | Marry the Poor Girl                           | Ingraham, Lloyd        | Lloyd Ingraham                             | tt0012449        |
| 1746524239        | 1915        | 1914        | How Cissy Made Good                              | How Cissy Made Good                           | Baker, George D.       | George D. Baker                            | tt0005520        |
| 1746573749        | 1958        | 1958        | The Lone Ranger and the Lost City of Gold        | The Lone Ranger and the Lost City of Gold     | Selander, Lesley       | Lesley Selander                            | tt0051876        |
| 1746584663        | 1928        | 1928        | Danger Street                                    | Danger Street                                 | Ince, Ralph            | Ralph Ince                                 | tt0018814        |
| 1746269707        | 1973        | 1973        | From the Mixed-Up Files of Mrs. Basil E. Frankwe | From the Mixed Up Files of Mrs. Basil E. Fran | Cook, Fielder          | Fielder Cook                               | tt0070079        |
| 1745293895        | 2006        | 2005        | Sir! No Sir!                                     | Sir! No Sir!                                  | Zeiger, David          | David Zeiger                               | tt0469589        |
| 1746507909        | 1950        | 1949        | Battleground                                     | Battleground                                  | Wellman, William       | William A. Wellman                         | tt0041163        |
| 1746514458        | 1916        | 1916        | The Gods of Fate                                 | The Gods of Fate                              | Pratt, Jack            | Jack Pratt                                 | tt0157707        |
| 1746574013        | 1962        | 1962        | Mr. Hobbs Takes a Vacation                       | Mr. Hobbs Takes a Vacation                    | Koster, Henry          | Henry Koster                               | tt0056255        |
| 1746512760        | 1910        | 1910        | Wifie's Mamma                                    | Wifie's Mamma                                 |                        |                                            | tt1799147        |
| 1746218753        | 1973        | 1973        | Enter the Dragon                                 | Enter the Dragon                              | Clouse, Robert         | Robert Clouse                              | tt0070034        |
| 1746500248        | 1923        | 1923        | Innocence                                        | Innocence                                     | Le Saint, Edward J.    | Edward LeSaint                             | tt0014154        |
| <b>1746576005</b> | <b>1910</b> | <b>1910</b> | <b>The Flower of the Ranch</b>                   | <b>The Flower of the Ranch</b>                |                        | <b>Gilbert M. 'Broncho Billy' Anderson</b> | <b>tt0001220</b> |
| 1746501777        | 1910        | 1910        | The Silent Message                               | The Silent Message                            |                        | Gilbert M. 'Broncho Billy' Anderson        | tt0001395        |
| 1745340165        | 2003        | 2003        | Duplex                                           | Duplex                                        | DeVito, Danny          | Danny DeVito                               | tt0266489        |
| 1746561554        | 1954        | 1954        | Rails into Laramie                               | Rails Into Laramie                            | Hibbs, Jesse           | Jesse Hibbs                                | tt0047389        |
| 1746583514        | 1928        | 1928        | The Drifting Kid                                 | The Drifting Kid                              |                        |                                            | tt0322087        |
| 1746569591        | 1956        | 1956        | Nightmare                                        | Nightmare                                     | Shane, Maxwell         | Maxwell Shane                              | tt0049553        |
| 1746566843        | 1952        | 1952        | Francis Goes to West Point                       | Francis Goes to West Point                    | Lubin, Arthur          | Arthur Lubin                               | tt0044633        |



|                   |             |             |                                |                                |                                     |                        |                  |   |
|-------------------|-------------|-------------|--------------------------------|--------------------------------|-------------------------------------|------------------------|------------------|---|
| 1746464880        | 1945        | 1945        | Salty O'Rourke                 | Salty O'Rourke                 | Walsh, Raoul                        | Raoul Walsh            | tt0038047        |   |
| 1746467779        | 1917        | 1917        | A Mormon Maid                  | A Mormon Maid                  | Leonard, Robert                     | Robert Z. Leonard      | tt0008319        |   |
| 1746569883        | 1958        | 1958        | Torpedo Run                    | Torpedo Run                    | Pevney, Joseph                      | Joseph Pevney          | tt0052303        |   |
| 1746582688        | 1937        | 1937        | Murder Goes to College         | Murder Goes to College         | Riesner, Charles                    | Charles Reisner        | tt0029273        |   |
| 1746574605        | 1933        | 1933        | The Fighting President         | The Fighting President         |                                     |                        | tt0183083        |   |
| 1746465310        | 1942        | 1942        | Overland to Deadwood           | Overland to Deadwood           | Berke, William                      | William Berke          | tt0203046        |   |
| 1745373938        | 2009        | 2009        | Beyond a Reasonable Doubt      | Beyond a Reasonable Doubt      | Hyams, Peter                        | Peter Hyams            | tt1183251        |   |
| 1746571085        | 1952        | 1952        | Rose of Cimarron               | Rose of Cimarron               | Keller, Harry                       | Harry Keller           | tt0045106        |   |
| 1746553924        | 1964        | 1964        | Light Fantastic                | Light Fantastic                | McCarty, Robert                     | Robert McCarty         | tt0145045        |   |
| 1746584553        | 1931        | 1931        | Her Majesty Love               | Her Majesty, Love              | Dieterle, William                   | William Dieterle       | tt0021952        |   |
| 1746583315        | 1929        | 1929        | The Divine Lady                | The Divine Lady                | Lloyd, Frank                        | Frank Lloyd            | tt0019824        |   |
| 1746420862        | 1995        | 1995        | Mad Love                       | Mad Love                       | Bird, Antonia                       | Antonia Bird           | tt0113729        |   |
| 1746569802        | 1956        | 1956        | Mohawk                         | Mohawk                         | Neumann, Kurt                       | Kurt Neumann           | tt0049515        |   |
| 1746573215        | 1931        | 1931        | Seas Beneath                   | Seas Beneath                   | Ford, John                          | John Ford              | tt0022353        |   |
| 1746524877        | 1922        | 1922        | The Clean Up                   | The Clean Up                   |                                     |                        | tt0355332        |   |
| 1746511742        | 1916        | 1916        | The Pawn of Fate               | Pawn of Fate                   | Tourneur, Maurice                   | Maurice Tourneur       | tt0007161        |   |
| 1745375128        | 2009        | 2009        | Cold Souls                     | Cold Souls                     | Barthes, Sophie                     | Sophie Barthes         | tt1127877        |   |
| 1746514795        | 1914        | 1914        | The Criminal Path              | The Criminal Path              | Davis, Will S.                      | Will S. Davis          | tt0002772        |   |
| 1745359045        | 2010        | 2010        | Frozen                         | Frozen                         | Green, Adam                         | Adam Green             | tt1323045        |   |
| 1746454449        | 1942        | 1942        | Blondie Goes to College        | Blondie Goes to College        | Strayer, Frank R.                   | Frank R. Strayer       | tt0034525        |   |
| 1746572862        | 1931        | 1930        | Free Love                      | Free Love                      | Henley, Hobart                      | Hobart Henley          | tt0020901        |   |
| 1746570231        | 1952        | 1952        | Lady in the Iron Mask          | Lady in the Iron Mask          | Murphy, Ralph                       | Ralph Murphy           | tt0044818        |   |
| 1746584628        | 1929        | 1929        | The Drake Case                 | The Drake Case                 | Laemmle, Edward                     | Edward Laemmle         | tt0019834        |   |
| 1745271694        | 2000        | 2000        | Rules of Engagement            | Rules of Engagement            | Friedkin, William                   | William Friedkin       | tt0160797        |   |
| 1746474969        | 1948        | 1948        | Angel in Exile                 | Angel in Exile                 | Dwan, Allan; Ford, Philip           | Allan Dwan             | tt0040094        |   |
| 1746582397        | 1929        | 1929        | The Redeeming Sin              | The Redeeming Sin              |                                     | Howard Bretherton      | tt0020319        |   |
| 1746577697        | 1933        | 1932        | Bachelor Mother                | Bachelor Mother                | Hutchison, Charles                  | Charles Hutchison      | tt0129768        |   |
| 1746577588        | 1933        | 1933        | Broadway Thru a Keyhole        | Broadway Thru a Keyhole        | Sherman, Lowell                     | Lowell Sherman         | tt0023847        |   |
| 1746410021        | 1983        | 1983        | Star 80                        | Star 80                        | Fosse, Bob                          | Bob Fosse              | tt0086355        |   |
| 1746256124        | 1976        | 1976        | Stay Hungry                    | Stay Hungry                    | Rafelson, Bob                       | Bob Rafelson           | tt0075268        |   |
| 1746217161        | 1968        | 1968        | High, Wild and Free            | High, Wild and Free            |                                     |                        | tt0252506        |   |
| <b>1746580268</b> | <b>1939</b> | <b>1939</b> | <b>Hollywood Cavalcade</b>     | <b>Hollywood Cavalcade</b>     | <b>Cummings, Irving</b>             | <b>Irving Cummings</b> | <b>tt0031433</b> | 1 |
| 1746524481        | 1922        | 1922        | Fighting Hearts                | Fighting Hearts                |                                     |                        | tt0357661        |   |
| 1746235825        | 1978        | 1978        | The Alpha Incident             | The Alpha Incident             | Rebane, Bill                        | Bill Rebane            | tt0075662        |   |
| <b>1769970167</b> | <b>1912</b> | <b>1912</b> | <b>The Other Woman</b>         | <b>The Other Woman</b>         |                                     | <b>George L. Cox</b>   | <b>tt041409</b>  | 1 |
| 1746567799        | 1932        | 1932        | The Miracle Man                | The Miracle Man                | McLeod, Norman                      | Norman Z. McLeod       | tt0023228        |   |
| 1746502560        | 1915        | 1915        | Colonel Carter of Cartersville | Colonel Carter of Cartersville | Hansell, Howell                     | Howell Hansel          | tt0005107        |   |
| 1746523476        | 1926        | 1926        | Beau Geste                     | Beau Geste                     | Brenon, Herbert                     | Herbert Brenon         | tt0016634        |   |
| 1746583665        | 1930        | 1930        | Call of the Desert             | Call of the Desert             | McGowan, J. P.                      | J.P. McGowan           | tt0020723        |   |
| 1746410191        | 1983        | 1983        | Amityville 3-D                 | Amityville 3 D                 | Fleischer, Richard                  | Richard Fleischer      | tt0085159        |   |
| 1746577209        | 1962        | 1962        | The Bashful Elephant           | The Bashful Elephant           | McGowan, Dorrell; McGowan, Stuar    | Dorrell McGowan        | tt0055777        |   |
| 1769969706        | 1911        | 1911        | Little Dove's Romance          | Little Dove's Romance          |                                     | Fred J. Balshofer      | tt0250503        |   |
| 1746514542        | 1915        | 1915        | Heartaches                     | Heartaches                     | Kaufman, Joseph                     | Joseph Kaufman         | tt0005455        |   |
| 1746492390        | 1948        | 1948        | Man-Eater of Kumaon            | Man Eater of Kumaon            | Haskin, Byron                       | Byron Haskin           | tt0040567        |   |
| 1746581281        | 1961        | 1961        | Mysterious Island              | Mysterious Island              | Endfield, Cy                        | Cy Endfield            | tt0055207        |   |
| 1746421588        | 1993        | 1993        | Mr. Nanny                      | Mr. Nanny                      | Gottlieb, Michael                   | Michael Gottlieb       | tt0107612        |   |
| 1746502436        | 1916        | 1916        | The Chalice of Sorrow          | The Chalice of Sorrow          | Ingram, Rex                         | Rex Ingram             | tt0006495        |   |
| 1746392909        | 1984        | 1984        | Top Secret!                    | Top Secret!                    | Abrahams, Jim; Zucker, David; Zucke | Jim Abrahams           | tt0088286        |   |
| 1746233348        | 1968        | 1968        | Sergeant Ryker                 | Sergeant Ryker                 | Kulik, Buzz                         | Buzz Kulik             | tt0063584        |   |
| 1746512584        | 1923        | 1923        | A Million To Burn              | A Million to Burn              | Parke, William                      | William Parke          | tt0014280        |   |
| 1769970504        | 1967        | 1967        | The Touch of Her Flesh         | The Touch of Her Flesh         | Marsh, Julian                       | Michael Findlay        | tt0062385        |   |
| 1746580805        | 1938        | 1938        | Torchy Gets Her Man            | Torchy Gets Her Man            | Beaudine, William                   | William Beaudine       | tt0030884        |   |
| 1746520973        | 1949        | 1949        | South of Rio                   | South of Rio                   | Ford, Philip                        | Philip Ford            | tt0041906        |   |
| 1746574800        | 1933        | 1933        | Dangerously Yours              | Dangerously Yours              | Tuttle, Frank                       | Frank Tuttle           | tt0023928        |   |
| 1746520226        | 1924        | 1924        | The Humming Bird               | The Humming Bird               | Olcott, Sidney                      | Sidney Olcott          | tt0015004        |   |
| 1746492426        | 1947        | 1947        | Lighthouse                     | Lighthouse                     | Wisbar, Frank                       | Frank Wisbar           | tt0039567        |   |
| 1746420961        | 1997        | 1997        | Kull the Conqueror             | Kull the Conqueror             | Nicolella, John                     | John Nicolella         | tt0119484        |   |

|            |      |      |                               |                               |                              |                        |           |
|------------|------|------|-------------------------------|-------------------------------|------------------------------|------------------------|-----------|
| 1746508909 | 1925 | 1925 | The Knockout                  | The Knockout                  | Hillyer, Lambert             | Lambert Hillyer        | tt0015983 |
| 1746512443 | 1916 | 1916 | The Gates of Eden             | The Gates of Eden             | Collins, John H.             | John H. Collins        | tt0006711 |
| 1746543070 | 1915 | 1915 | Saved from the Harem          | Saved from the Harem          | Melville, Wilbert            | Wilbert Melville       | tt0006007 |
| 1746586158 | 1940 | 1940 | Free, Blonde and 21           | Free, Blonde and 21           | Cortez, Ricardo              | Ricardo Cortez         | tt0032492 |
| 1746567791 | 1952 | 1952 | Just This Once                | Just This Once                | Weis, Don                    | Don Weis               | tt0044781 |
| 1746208634 | 1966 | 1966 | Madame X                      | Madame X                      | Rich, David Lowell           | David Lowell Rich      | tt0060645 |
| 1746583131 | 1937 | 1937 | Blazing Sixes                 | Blazing Sixes                 | Smith, Noel                  | Noel M. Smith          | tt0028639 |
| 1745340970 | 2003 | 2003 | The Haunted Mansion           | The Haunted Mansion           | Minkoff, Rob                 | Rob Minkoff            | tt0338094 |
| 1746502828 | 1916 | 1916 | He Fell in Love with His Wife | He Fell in Love with His Wife | Taylor, William D.           | William Desmond Taylor | tt0006765 |
| 1745309369 | 2005 | 2005 | Just Like Heaven              | Just Like Heaven              | Waters, Mark                 | Mark Waters            | tt0425123 |
| 1746423291 | 1991 | 1991 | The Addams Family             | The Addams Family             | Sonnenfeld, Barry            | Barry Sonnenfeld       | tt0101272 |
| 1746525143 | 1919 | 1919 | The Winchester Woman          | The Winchester Woman          | Ruggles, Wesley              | Wesley Ruggles         | tt0010898 |
| 1745357904 | 2004 | 2004 | White Chicks                  | White Chicks                  | Wayans, Keenen Ivory         | Keenen Ivory Wayans    | tt0381707 |
| 1746561761 | 1956 | 1955 | Artists and Models            | Artists and Models            | Tashlin, Frank               | Frank Tashlin          | tt0047840 |
| 1746497608 | 1920 | 1920 | The Prince Chap               | The Prince Chap               | de Mille, William            | William C. de Mille    | tt0011601 |
| 1746583445 | 1931 | 1931 | Branded Men                   | Branded Men                   | Rosen, Phil                  | Phil Rosen             | tt0021694 |
| 1746185846 | 1969 | 1969 | Stiletto                      | Stiletto                      | Kowalski, Bernard L.         | Bernard L. Kowalski    | tt0065038 |
| 1746584299 | 1935 | 1935 | Jalna                         | Jalna                         | Cromwell, John               | John Cromwell          | tt0026542 |
| 1746507790 | 1927 | 1927 | Tarzan and the Golden Lion    | Tarzan and the Golden Lion    | McGowan, J. P.               | J.P. McGowan           | tt0018464 |
| 1746421984 | 1994 | 1994 | House Party 3                 | House Party 3                 | Meza, Eric                   | Eric Meza              | tt0110064 |
| 1746465169 | 1942 | 1942 | Rodeo Rhythm                  | Rodeo Rhythm                  | Newmeyer, Fred               | Fred C. Newmeyer       | tt0034123 |
| 1746424195 | 1941 | 1941 | Country Fair                  | Country Fair                  | McDonald, Frank              | Frank McDonald         | tt0033492 |
| 1746410005 | 1992 | 1992 | The Cutting Edge              | The Cutting Edge              | Glaser, Paul M.              | Paul Michael Glaser    | tt0104040 |
| 1746513690 | 1916 | 1916 | The Rise of Susan             | The Rise of Susan             | Taylor, S. E. V.             | Stanner E.V. Taylor    | tt0007265 |
| 1746439707 | 1996 | 1996 | The Truth About Cats and Dogs | The Truth About Cats & Dogs   | Lehmann, Michael             | Michael Lehmann        | tt0117979 |
| 1746566157 | 1958 | 1958 | Fort Dobbs                    | Fort Dobbs                    | Douglas, Gordon              | Gordon Douglas         | tt0051628 |
| 1746435568 | 1940 | 1940 | Married and in Love           | Married and in Love           | Farrow, John                 | John Farrow            | tt0032764 |
| 1746492581 | 1944 | 1944 | Brand of the Devil            | Brand of the Devil            | Fraser, Harry                | Harry L. Fraser        | tt0036669 |
| 1746502468 | 1916 | 1916 | Molly Make-Believe            | Molly Make Believe            | Dawley, J. Searle            | J. Searle Dawley       | tt0007088 |
| 1746584679 | 1930 | 1930 | The Lady of Scandal           | The Lady of Scandal           | Franklin, Sidney             | Sidney Franklin        | tt0021042 |
| 1746577783 | 1938 | 1938 | Prairie Moon                  | Prairie Moon                  | Staub, Ralph                 | Ralph Staub            | tt0030620 |
| 1746423484 | 1996 | 1996 | A Time to Kill                | A Time to Kill                | Schumacher, Joel             | Joel Schumacher        | tt0117913 |
| 1746578742 | 1960 | 1959 | The Angry Red Planet          | The Angry Red Planet          | Melchior, Ib                 | Ib Melchior            | tt0052564 |
| 1746583731 | 1931 | 1931 | Five and Ten                  | Five and Ten                  |                              | Robert Z. Leonard      | tt0021874 |
| 1746578499 | 1959 | 1959 | Island of Lost Women          | Island of Lost Women          | Tuttle, Frank W.             | Frank Tuttle           | tt0052932 |
| 1746525180 | 1921 | 1921 | Woman's Place                 | Woman's Place                 | Fleming, Victor              | Victor Fleming         | tt0012862 |
| 1746575053 | 1934 | 1934 | Hell Bent for Love            | Hell Bent for Love            | Lederman, D. Ross            | D. Ross Lederman       | tt0025231 |
| 1746394450 | 1985 | 1985 | Prizzi's Honor                | Prizzi's Honor                | Huston, John                 | John Huston            | tt0089841 |
| 1746454845 | 1946 | 1946 | Boston Blackie and the Law    | Boston Blackie and the Law    | Lederman, D. Ross            | D. Ross Lederman       | tt0038377 |
| 1746583133 | 1937 | 1937 | The Road Back                 | The Road Back                 | Whale, James                 | James Whale            | tt0029491 |
| 1746586155 | 1939 | 1939 | Chasing Danger                | Chasing Danger                | Cortez, Richard              | Ricardo Cortez         | tt0031151 |
| 1746474972 | 1944 | 1944 | The Town Went Wild            | The Town Went Wild            | Murphy, Ralph                | Ralph Murphy           | tt0037388 |
| 1745342869 | 2003 | 2003 | Radio                         | Radio                         | Tollin, Mike                 | Michael Tollin         | tt0316465 |
| 1746577028 | 1951 | 1950 | A Wonderful Life              | A Wonderful Life              | Beaudine, William            | William Beaudine       | tt0297468 |
| 1746453513 | 1943 | 1943 | Truck Busters                 | Truck Busters                 | Eason, B. Reeves             | B. Reeves Eason        | tt0036460 |
| 1746569580 | 1956 | 1956 | The Wild Party                | The Wild Party                | Horner, Harry                | Harry Horner           | tt0049955 |
| 1746582569 | 1938 | 1938 | Guilty Trails                 | Guilty Trails                 | Waggner, George              | George Waggner         | tt0030206 |
| 1746514587 | 1923 | 1923 | Rupert of Hentzau             | Rupert of Hentzau             | Heerman, Victor              | Victor Heerman         | tt0014424 |
| 1746211103 | 1973 | 1972 | Ciao Manhattan                | Ciao Manhattan                | Palmer, John; Weisman, David | John Palmer            | tt0068379 |
| 1746259493 | 1978 | 1978 | A Wedding                     | A Wedding                     | Altman, Robert               | Robert Altman          | tt0078481 |
| 1746569518 | 1958 | 1958 | I Married a Woman             | I Married a Woman             | Kanter, Hal                  | Hal Kanter             | tt0051757 |
| 1746520535 | 1926 | 1926 | Red Hot Hoofs                 | Red Hot Hoofs                 | De Lacey, Robert             | Robert De Lacey        | tt0017318 |
| 1746515384 | 1917 | 1917 | The Wildcat                   | The Wildcat                   | McDonald, Sherwood           | Sherwood MacDonald     | tt0156181 |
| 1746423746 | 1998 | 1998 | Dirty Work                    | Dirty Work                    | Saget, Bob                   | Bob Saget              | tt0120654 |
| 1746410437 | 1992 | 1992 | A Few Good Men                | A Few Good Men                | Reiner, Rob                  | Rob Reiner             | tt0104257 |
| 1746566116 | 1958 | 1958 | Missile Monsters              | Missile Monsters              | Brannon, Fred C.             | Fred C. Brannon        | tt0051935 |
| 1746498662 | 1921 | 1921 | Ever Since Eve                | Ever Since Eve                | Mitchell, Howard M.          | Howard M. Mitchell     | tt0012139 |

|            |      |      |                                                 |                                                 |                                      |                    |           |
|------------|------|------|-------------------------------------------------|-------------------------------------------------|--------------------------------------|--------------------|-----------|
| 1746422599 | 1994 | 1994 | Mr. Write                                       | Mr. Write                                       | Loventhal, Charlie                   | Charlie Loventhal  | tt0110587 |
| 1746500514 | 1925 | 1925 | The Girl of Gold                                | The Girl of Gold                                | Ince, John                           | John Ince          | tt0133802 |
| 1746570460 | 1934 | 1934 | Harold Teen                                     | Harold Teen                                     | Roth, Murray                         | Murray Roth        | tt0025221 |
| 1746437389 | 1943 | 1943 | Cowboy Commandos                                | Cowboy Commandos                                | Luby, S. Roy                         | S. Roy Luby        | tt0035760 |
| 1746573412 | 1932 | 1932 | Beauty Parlor                                   | Beauty Parlor                                   | Thorpe, Richard                      | Richard Thorpe     | tt0022661 |
| 1746500361 | 1924 | 1924 | White Man                                       | White Man                                       | Gasnier, Louis                       | Louis J. Gasnier   | tt0015491 |
| 1746573819 | 1956 | 1956 | The Great Locomotive Chase                      | The Great Locomotive Chase                      | Lyon, Francis                        | Francis D. Lyon    | tt0049279 |
| 1746219016 | 1980 | 1980 | Nine to Five                                    | Nine to Five                                    | Higgins, Colin                       | Colin Higgins      | tt0080319 |
| 1746501255 | 1914 | 1914 | John Barleycorn                                 | John Barleycorn                                 | Bosworth, Hobart; Haydon, J. Charles | Hobart Bosworth    | tt0004175 |
| 1746423738 | 1994 | 1994 | Clerks                                          | Clerks                                          | Smith, Kevin                         | Kevin Smith        | tt0109445 |
| 1746566006 | 1957 | 1956 | The Rainmaker                                   | The Rainmaker                                   | Anthony, Joseph                      | Joseph Anthony     | tt0049653 |
| 1746570254 | 1933 | 1933 | I Love That Man                                 | I Love That Man                                 | Brown, Harry Joe                     | Harry Joe Brown    | tt0024158 |
| 1746577201 | 1950 | 1950 | My Blue Heaven                                  | My Blue Heaven                                  | Koster, Henry                        | Henry Koster       | tt0042767 |
| 1746585188 | 1930 | 1930 | Murder Will Out                                 | Murder Will Out                                 | Badger, Clarence                     | Clarence G. Badger | tt0021163 |
| 1746235360 | 1973 | 1973 | Savage!                                         | Savage!                                         | Santiago, Cirio H.                   | Cirio H. Santiago  | tt0070639 |
| 1746574096 | 1962 | 1962 | Walk on the Wild Side                           | Walk on the Wild Side                           | Dmytryk, Edward                      | Edward Dmytryk     | tt0056671 |
| 1746504382 | 1922 | 1922 | Once Upon a Time                                | Once Upon a Time                                | Owen, Ruth Bryan                     | Ruth Bryan Owen    | tt4578178 |
| 1746580205 | 1938 | 1938 | Campus Confessions                              | Campus Confessions                              | Archainbaud, George                  | George Archainbaud | tt0029965 |
| 1746496325 | 1918 | 1918 | The Transgressor                                | The Transgressor                                | Levering, Joseph                     | Joseph Levering    | tt0190083 |
| 1746584076 | 1937 | 1937 | Think Fast, Mr. Moto                            | Think Fast, Mr. Moto                            | Foster, Norman                       | Norman Foster      | tt0029660 |
| 1746514832 | 1910 | 1910 | Two Boys in Blue                                | Two Boys in Blue                                | Turner, Otis                         | Otis Turner        | tt0346071 |
| 1746504061 | 1917 | 1917 | Barbary Sheep                                   | Barbary Sheep                                   | Tourneur, Maurice                    | Maurice Tourneur   | tt0007678 |
| 1746453760 | 1943 | 1943 | Rookies in Burma                                | Rookies in Burma                                | Goodwins, Leslie                     | Leslie Goodwins    | tt0036317 |
| 1746420730 | 1993 | 1993 | RoboCop 3                                       | RoboCop 3                                       | Dekker, Fred                         | Fred Dekker        | tt0107978 |
| 1746577625 | 1936 | 1936 | Murder on a Bridle Path                         | Murder on a Bridle Path                         | Killy, Edward; Hamilton, William     | William Hamilton   | tt0028003 |
| 1746566188 | 1958 | 1958 | Damn Citizen                                    | Damn Citizen                                    | Gordon, Robert                       | Robert Gordon      | tt0051515 |
| 1746585283 | 1930 | 1930 | The Break Up                                    | The Break Up                                    | Robertson, Jack                      | Jack Robertson     | tt0370368 |
| 1746454010 | 1943 | 1943 | Claudia                                         | Claudia                                         | Goulding, Edmund                     | Edmund Goulding    | tt0035742 |
| 1746199188 | 1968 | 1968 | Have You Heard of the San Francisco Mime Troupe | Have You Heard of the San Francisco Mime Troupe | Lenzer, Don; Wardenburg, Fred        | Don Lenzer         | tt1608627 |
| 1746508228 | 1950 | 1950 | Cherokee Uprising                               | Cherokee Uprising                               | Collins, Lewis                       | Lewis D. Collins   | tt0042328 |
| 1746502190 | 1910 | 1910 | A Salutory Lesson                               | A Salutory Lesson                               | Griffith, D. W.                      | D.W. Griffith      | tt0001390 |
| 1746573477 | 1932 | 1932 | You Said a Mouthful                             | You Said a Mouthful                             | Bacon, Lloyd                         | Lloyd Bacon        | tt0023716 |
| 1746583301 | 1950 | 1950 | The Nevadan                                     | The Nevadan                                     | Douglas, Gordon                      | Gordon Douglas     | tt0042782 |
| 1746422252 | 1998 | 1998 | Without Limits                                  | Without Limits                                  | Towne, Robert                        | Robert Towne       | tt0119934 |
| 1746394687 | 1984 | 1984 | The World of Tomorrow                           | The World of Tomorrow                           | Johnson, Tom; Bird, Lance            | Lance Bird         | tt0184038 |
| 1746515032 | 1910 | 1910 | The Miser's Child                               | The Miser's Child                               |                                      | Sidney Olcott      | tt0001323 |
| 1746437318 | 1943 | 1943 | Isle of Forgotten Sins                          | Isle of Forgotten Sins                          | Ulmer, Edgar G.                      | Edgar G. Ulmer     | tt0036046 |
| 1746561903 | 1957 | 1957 | Peyton Place                                    | Peyton Place                                    | Robson, Mark                         | Mark Robson        | tt0050839 |
| 1746577891 | 1936 | 1936 | Aces Wild                                       | Aces Wild                                       | Fraser, Harry                        | Harry L. Fraser    | tt0028550 |
| 1746465252 | 1947 | 1947 | The Case of the Baby Sitter                     | The Case of the Baby Sitter                     | Hillyer, Lambert                     | Lambert Hillyer    | tt0039249 |
| 1746271199 | 1978 | 1978 | Fingers                                         | Fingers                                         | Toback, James                        | James Toback       | tt0077549 |
| 1746574901 | 1933 | 1933 | The Sphinx                                      | The Sphinx                                      | Rosen, Phil                          | Phil Rosen         | tt0024605 |
| 1746574924 | 1937 | 1937 | Music for Madame                                | Music for Madame                                | Blystone, John                       | John G. Blystone   | tt0029277 |
| 1746219079 | 1972 | 1972 | Black Rodeo                                     | Black Rodeo                                     | Kanew, Jeff                          | Jeff Kanew         | tt0068283 |
| 1746582031 | 1928 | 1928 | The Woman From Moscow                           | The Woman from Moscow                           | Berger, Ludwig                       | Ludwig Berger      | tt0018592 |
| 1746507894 | 1926 | 1926 | Sparrows                                        | Sparrows                                        | Beaudine, William                    | William Beaudine   | tt0017423 |
| 1746585359 | 1940 | 1940 | Young Buffalo Bill                              | Young Buffalo Bill                              | Kane, Joseph                         | Joseph Kane        | tt0033287 |
| 1746465085 | 1941 | 1941 | Peer Gynt                                       | Peer Gynt                                       | Bradley, David                       | David Bradley      | tt0034010 |
| 1769974249 | 1916 | 1916 | The Chain of Evidence                           | The Chain of Evidence                           |                                      | Walter V. Coyle    | tt0245044 |
| 1746554463 | 1964 | 1964 | What's Up Front                                 | What's Up Front!                                | Wehling, Bob                         | Bob Wehling        | tt0057679 |
| 1746500169 | 1949 | 1949 | The Undercover Man                              | The Undercover Man                              | Lewis, Joseph H.                     | Joseph H. Lewis    | tt0042006 |
| 1746436357 | 1941 | 1941 | Wyoming Wildcat                                 | Wyoming Wildcat                                 | Sherman, George                      | George Sherman     | tt0034404 |
| 1745359950 | 2004 | 2004 | Seed of Chucky                                  | Seed of Chucky                                  | Mancini, Don                         | Don Mancini        | tt0387575 |
| 1746509486 | 1950 | 1950 | Guilty of Treason                               | Guilty of Treason                               | Feist, Felix                         | Felix E. Feist     | tt0041437 |
| 1746511750 | 1928 | 1928 | The Lion and the Mouse                          | The Lion and the Mouse                          | Bacon, Lloyd                         | Lloyd Bacon        | tt0019100 |
| 1746235443 | 1973 | 1973 | Lost Horizon                                    | Lost Horizon                                    | Jarrott, Charles                     | Charles Jarrott    | tt0070337 |
| 1746453568 | 1943 | 1943 | Dead Man's Gulch                                | Dead Man's Gulch                                | English, John                        | John English       | tt0035783 |

|            |      |      |                                  |                                  |                                  |                    |           |
|------------|------|------|----------------------------------|----------------------------------|----------------------------------|--------------------|-----------|
| 1746583358 | 1929 | 1929 | Mexicali Rose                    | Mexicali Rose                    | Kenton, Erle C.                  | Erle C. Kenton     | tt0020166 |
| 1746585209 | 1930 | 1930 | The Sea God                      | The Sea God                      | Abbott, George                   | George Abbott      | tt0021346 |
| 1746501322 | 1910 | 1910 | The Red Girl and the Child       | The Red Girl and the Child       | Young Deer, James                | James Young Deer   | tt0234581 |
| 1746585113 | 1930 | 1930 | Seven Days Leave                 | Seven Days Leave                 | Wallace, Richard                 | Richard Wallace    | tt0021357 |
| 1746500275 | 1927 | 1927 | Silk Stockings                   | Silk Stockings                   | Ruggles, Wesley                  | Wesley Ruggles     | tt0018403 |
| 1746493897 | 1910 | 1910 | Unreasonable Jealousy            | Unreasonable Jealousy            |                                  |                    | tt0360136 |
| 1746569808 | 1958 | 1958 | Fort Bowie                       | Fort Bowie                       | Koch, Howard W.                  | Howard W. Koch     | tt0051627 |
| 1746198495 | 1969 | 1969 | The Vixens                       | The Vixens                       | Cort, Harvey                     | Harvey Cort        | tt0248603 |
| 1746498334 | 1921 | 1921 | A Knight of the West             | A Knight of the West             | McKenzie, Robert                 | Robert McKenzie    | tt0126371 |
| 1746555487 | 1955 | 1955 | High Society                     | High Society                     | Beaudine, William                | William Beaudine   | tt0048166 |
| 1746453969 | 1997 | 1997 | The Postman                      | The Postman                      | Costner, Kevin                   | Kevin Costner      | tt0119925 |
| 1746409697 | 1987 | 1987 | Dirty Dancing                    | Dirty Dancing                    | Ardolino, Emile                  | Emile Ardolino     | tt0092890 |
| 1746585488 | 1940 | 1940 | On the Spot                      | On the Spot                      | Bretherton, Howard               | Howard Bretherton  | tt0032868 |
| 1746394513 | 1979 | 1979 | Squeeze Play                     | Squeeze Play                     | Weil, Samuel                     | Lloyd Kaufman      | tt0081552 |
| 1745395782 | 2008 | 2007 | Frownland                        | Frownland                        | Bronstein, Ronald                | Ronald Bronstein   | tt0970935 |
| 1746434614 | 1992 | 1992 | The Mambo Kings                  | The Mambo Kings                  | Glimcher, Arne                   | Arne Glimcher      | tt0104802 |
| 1745342309 | 2008 | 2008 | Hancock                          | Hancock                          | Berg, Peter                      | Peter Berg         | tt0448157 |
| 1746582306 | 1951 | 1951 | Mask of the Avenger              | Mask of the Avenger              | Karlson, Phil; Pichel, Irving    | Phil Karlson       | tt0043790 |
| 1746554936 | 1964 | 1964 | Honeymoon of Horror              | Honeymoon of Horror              | Meyer, Irwin                     | Irwin Meyer        | tt0058205 |
| 1746577860 | 1937 | 1936 | Dodge City Trail                 | Dodge City Trail                 | Coleman, C. C.                   | Charles C. Coleman | tt0003854 |
| 1746583847 | 1931 | 1931 | Wild West Whoopee                | Wild West Whoopee                | Horner, Robert J.                | Robert J. Horner   | tt0022563 |
| 1746453831 | 1940 | 1940 | Hot Steel                        | Hot Steel                        | Cabanne, Christy                 | Christy Cabanne    | tt0032608 |
| 1769969704 | 1911 | 1911 | Mutt and Jeff Break Into Society | Mutt and Jeff Break Into Society |                                  |                    | tt1235156 |
| 1746584504 | 1931 | 1931 | The Tip-Off                      | The Tip Off                      | Rogell, Albert                   | Albert S. Rogell   | tt0022484 |
| 1746218917 | 1975 | 1975 | Night Moves                      | Night Moves                      | Penn, Arthur                     | Arthur Penn        | tt0073453 |
| 1746569601 | 1953 | 1954 | Dragon's Gold                    | Dragon's Gold                    | Wisberg, Aubrey; Pollexfen, Jack | Jack Pollexfen     | tt0207433 |
| 1746577134 | 1962 | 1962 | What Ever Happened to Baby Jane? | What Ever Happened to Baby Jane? | Aldrich, Robert                  | Robert Aldrich     | tt0056687 |
| 1746513447 | 1916 | 1916 | Dust                             | Dust                             | Sloman, Edward                   | Edward Sloman      | tt0157561 |
| 1746573745 | 1957 | 1957 | The Buckskin Lady                | The Buckskin Lady                | Hittleman, Carl K.               | Carl K. Hittleman  | tt0050215 |
| 1746582249 | 1928 | 1928 | Tenderloin                       | Tenderloin                       | Curtiz, Michael                  | Michael Curtiz     | tt0019453 |
| 1746422231 | 1999 | 1999 | Love Stinks                      | Love Stinks                      | Franklin, Jeff                   | Jeff Franklin      | tt0188863 |
| 1746580468 | 1937 | 1937 | The 13th Man                     | The 13th Man                     | Nigh, William                    | William Nigh       | tt0028360 |
| 1746583270 | 1930 | 1930 | Dangerous Paradise               | Dangerous Paradise               | Wellman, William                 | William A. Wellman | tt0020810 |
| 1746565298 | 1932 | 1932 | Scandal for Sale                 | Scandal for Sale                 | Mack, Russell                    | Russell Mack       | tt0023426 |
| 1746581932 | 1930 | 1930 | Let's Go Native                  | Let's Go Native                  | McCarey, Leo                     | Leo McCarey        | tt0021061 |
| 1746524938 | 1923 | 1923 | White Tiger                      | White Tiger                      | Browning, Tod                    | Tod Browning       | tt0014606 |
| 1746570023 | 1952 | 1952 | Room for One More                | Room for One More                | Taugog, Norman                   | Norman Taugog      | tt0045102 |
| 1746566130 | 1954 | 1954 | A Star Is Born                   | A Star Is Born                   | Cukor, George                    | George Cukor       | tt0047522 |
| 1746497287 | 1919 | 1919 | Hawthorne of the U.S.A.          | Hawthorne of the U.S.A.          | Cruze, James                     | James Cruze        | tt0010219 |
| 1746514209 | 1916 | 1916 | His Lordship                     | His Lordship                     | McKim, Edwin                     | Edwin McKim        | tt0204377 |
| 1746421233 | 1994 | 1994 | No Escape                        | No Escape                        | Campbell, Martin                 | Martin Campbell    | tt0110678 |
| 1746520348 | 1924 | 1924 | Ace of Cactus Range              | Ace of Cactus Range              | Dixon, Denver; Andrus, Malon     | Victor Adamson     | tt0014645 |
| 1746565962 | 1956 | 1956 | Flight to Hong Kong              | Flight to Hong Kong              | Newman, Joseph M.                | Joseph M. Newman   | tt0049219 |
| 1746210722 | 1973 | 1973 | Walking Tall                     | Walking Tall                     | Karlson, Phil                    | Phil Karlson       | tt0070895 |
| 1746453996 | 1996 | 1995 | Killer: A Journal of Murder      | Killer: A Journal of Murder      | Metcalfe, Tim                    | Tim Metcalfe       | tt0113542 |
| 1746453572 | 1942 | 1942 | Mississippi Gambler              | Mississippi Gambler              | Rawlins, John                    | John Rawlins       | tt0035070 |
| 1746216726 | 1969 | 1969 | Run, Angel, Run!                 | Run, Angel, Run!                 | Starrett, Jack                   | Jack Starrett      | tt0064911 |
| 1746507765 | 1927 | 1927 | The Magic Flame                  | The Magic Flame                  | King, Henry                      | Henry King         | tt0018129 |
| 1746572242 | 1931 | 1931 | Resurrection                     | Resurrection                     | Carewe, Edwin                    | Edwin Carewe       | tt0022307 |
| 1746585129 | 1929 | 1929 | Bellamy Trial                    | Bellamy Trial                    | Bell, Monta                      | Monta Bell         | tt0018685 |
| 1746584017 | 1939 | 1939 | Woman Doctor                     | Woman Doctor                     | Salkow, Sidney                   | Sidney Salkow      | tt0032140 |
| 1746573960 | 1956 | 1956 | The Fastest Gun Alive            | The Fastest Gun Alive            | Rouse, Russell                   | Russell Rouse      | tt0049201 |
| 1746525098 | 1920 | 1920 | Miss Nobody                      | Miss Nobody                      | Grandon, Francis J.              | Francis J. Grandon | tt0011470 |
| 1746434633 | 1989 | 1989 | Ghostbusters II                  | Ghostbusters II                  | Reitman, Ivan                    | Ivan Reitman       | tt0097428 |
| 1746465352 | 1947 | 1947 | Sinbad the Sailor                | Sinbad, the Sailor               | Wallace, Richard                 | Richard Wallace    | tt0039826 |
| 1746514780 | 1923 | 1923 | Battling Bates                   | Battling Bates                   | Cullison, Webster                | Webster Cullison   | tt0127452 |
| 1746514323 | 1915 | 1915 | Enoch Arden                      | Enoch Arden                      | Cabanne, William Christy         | Christy Cabanne    | tt0005246 |

|            |      |      |                                          |                                          |                                    |                          |           |
|------------|------|------|------------------------------------------|------------------------------------------|------------------------------------|--------------------------|-----------|
| 1769970670 | 1966 | 1966 | Honey                                    | Honey                                    | Denby, Jerry                       | Jerry Denby              | tt0219803 |
| 1746500647 | 1924 | 1924 | The Cowboy and the Flapper               | The Cowboy and the Flapper               | Neitz, Alvin J.                    | Alan James               | tt0014804 |
| 1746565987 | 1954 | 1954 | Hell Below Zero                          | Hell Below Zero                          | Robson, Mark                       | Mark Robson              | tt0047072 |
| 1746496540 | 1920 | 1920 | The Stolen Kiss                          | The Stolen Kiss                          | Webb, Kenneth                      | Kenneth S. Webb          | tt0130285 |
| 1746514702 | 1916 | 1916 | The Question                             | The Question                             | Handworth, Harry                   | Harry Handworth          | tt0158878 |
| 1746577828 | 1937 | 1937 | All over Town                            | All Over Town                            | Horne, James                       | James W. Horne           | tt0028568 |
| 1746580904 | 1937 | 1937 | Mama Steps Out                           | Mama Steps Out                           | Seitz, George B.                   | George B. Seitz          | tt0029196 |
| 1746500159 | 1925 | 1925 | The Little French Girl                   | The Little French Girl                   | Brenon, Herbert                    | Herbert Brenon           | tt0016030 |
| 1746582846 | 1938 | 1938 | Love on a Budget                         | Love on a Budget                         | Leeds, Herbert I.                  | Herbert I. Leeds         | tt0030390 |
| 1746465326 | 1942 | 1942 | Fingers at the Window                    | Fingers at the Window                    | Lederer, Charles                   | Charles Lederer          | tt0034732 |
| 1746419763 | 1989 | 1988 | Pumpkinhead                              | Pumpkinhead                              | Winston, Stan                      | Stan Winston             | tt0095925 |
| 1746501864 | 1916 | 1916 | Pay Dirt                                 | Pay Dirt                                 | King, Henry                        | Henry King               | tt0163145 |
| 1746464990 | 1947 | 1947 | The Private Affairs of Bel Ami           | The Private Affairs of Bel Ami           | Lewin, Albert                      | Albert Lewin             | tt0039735 |
| 1746582361 | 1930 | 1930 | True to the Navy                         | True to the Navy                         | Tuttle, Frank                      | Frank Tuttle             | tt0021492 |
| 1746500218 | 1950 | 1950 | The Kid from Texas                       | The Kid from Texas                       | Neumann, Kurt                      | Kurt Neumann             | tt0042638 |
| 1746514080 | 1915 | 1915 | Just Out of College                      | Just Out of College                      | Irving, George                     | George Irving            | tt0005583 |
| 1746474138 | 1948 | 1948 | The Luck of the Irish                    | The Luck of the Irish                    | Koster, Henry                      | Henry Koster             | tt0040553 |
| 1746198065 | 1968 | 1968 | Cargo of Love                            | Cargo of Love                            | Holden, Anton                      | Anton Holden             | tt0062780 |
| 1746492242 | 1948 | 1948 | June Bride                               | June Bride                               | Windust, Bretaigne                 | Bretaigne Windust        | tt0040499 |
| 1746435013 | 1992 | 1992 | South Central                            | South Central                            | Anderson, Steve                    | Stephen Milburn Anderson | tt0105450 |
| 1746573727 | 1958 | 1958 | The Key                                  | The Key                                  | Reed, Carol                        | Carol Reed               | tt0051816 |
| 1746578661 | 1961 | 1961 | The Ladies' Man                          | The Ladies Man                           | Lewis, Jerry                       | Jerry Lewis              | tt0055069 |
| 1746523287 | 1915 | 1915 | Midnight at Maxim's                      | Midnight at Maxim's                      | Sargent, George L.                 | George L. Sargent        | tt0005740 |
| 1746392729 | 1982 | 1982 | Death Wish II                            | Death Wish II                            | Winner, Michael                    | Michael Winner           | tt0082250 |
| 1746570565 | 1934 | 1934 | Mandalay                                 | Mandalay                                 | Curtiz, Michael                    | Michael Curtiz           | tt0025461 |
| 1746550194 | 1955 | 1955 | The Big Tip Off                          | The Big Tip Off                          | McDonald, Frank                    | Frank McDonald           | tt0047881 |
| 1746580731 | 1935 | 1935 | Devil Dogs of the Air                    | Devil Dogs of the Air                    | Bacon, Lloyd                       | Lloyd Bacon              | tt0026275 |
| 1746577439 | 1958 | 1958 | The Spider                               | The Spider                               | Gordon, Bert I.                    | Bert I. Gordon           | tt0051570 |
| 1746475894 | 1944 | 1944 | Tahiti Nights                            | Tahiti Nights                            | Jason, Will                        | Will Jason               | tt0038147 |
| 1746454064 | 1940 | 1940 | Riders of Pasco Basin                    | Riders of Pasco Basin                    | Taylor, Ray                        | Ray Taylor               | tt0032990 |
| 1746572087 | 1932 | 1932 | Strange Interlude                        | Strange Interlude                        | Leonard, Robert Z.                 | Robert Z. Leonard        | tt0023523 |
| 1746500121 | 1945 | 1945 | Song of the Prairie                      | Song of the Prairie                      | Nazarro, Ray                       | Ray Nazarro              | tt0038102 |
| 1746582405 | 1938 | 1938 | The Lady Objects                         | The Lady Objects                         | Kenton, Erle C.                    | Erle C. Kenton           | tt0030340 |
| 1769970057 | 1912 | 1912 | The Mother of the Ranch                  | The Mother of the Ranch                  |                                    | Arthur Mackley           | tt0002376 |
| 1746580545 | 1935 | 1935 | Coyote Trails                            | Coyote Trails                            | Ray, B. B.                         | Bernard B. Ray           | tt0026244 |
| 1746584641 | 1930 | 1929 | Dark Skies                               | Dark Skies                               | Webb, Harry S.                     | Harry S. Webb            | tt0019804 |
| 1746559821 | 1965 | 1965 | The Nest of the Cuckoo Birds             | The Nest of the Cuckoo Birds             | Williams, Bert                     | Bert Williams            | tt0361953 |
| 1746569926 | 1954 | 1954 | Prisoner of War                          | Prisoner of War                          | Marton, Andrew                     | Andrew Marton            | tt0047369 |
| 1746491842 | 1947 | 1947 | Big Town After Dark                      | Big Town After Dark                      | Thomas, William C.                 | William C. Thomas        | tt0039187 |
| 1746439135 | 1943 | 1943 | High Explosive                           | High Explosive                           | McDonald, Frank                    | Frank McDonald           | tt0035999 |
| 1746508220 | 1926 | 1925 | Riding for Life                          | Riding for Life                          | Wright, Mack V.                    | Mack V. Wright           | tt0156960 |
| 1746499942 | 1923 | 1923 | The Ghost Patrol                         | The Ghost Patrol                         | Ross, Nat                          | Nat Ross                 | tt0014080 |
| 1746419623 | 1982 | 1982 | The World According to Garp              | The World According to Garp              | Hill, George Roy                   | George Roy Hill          | tt0084917 |
| 1746577619 | 1937 | 1937 | God's Country and the Man                | God's Country and the Man                | Bradbury, Robert N.                | Robert N. Bradbury       | tt0028940 |
| 1746433761 | 1996 | 1996 | Homeward Bound II: Lost in San Francisco | Homeward Bound II: Lost in San Francisco | Ellis, David R.                    | David R. Ellis           | tt0116552 |
| 1746491894 | 1948 | 1948 | Blood on the Moon                        | Blood on the Moon                        | Wise, Robert                       | Robert Wise              | tt0040175 |
| 1746423193 | 1940 | 1940 | Love, Honor, and Oh-Baby!                | Love, Honor, and Oh Baby!                | Lamont, Charles                    | Charles Lamont           | tt0032731 |
| 1746419614 | 1993 | 1993 | Mr. Jones                                | Mr. Jones                                | Figgis, Mike                       | Mike Figgis              | tt0107611 |
| 1746454846 | 1945 | 1945 | Three's a Crowd                          | Three's a Crowd                          | Selander, Lesley                   | Lesley Selander          | tt0038169 |
| 1746576312 | 1931 | 1931 | The Spider                               | The Spider                               | Menzies, William C.; MacKenna, Ken | Kenneth MacKenna         | tt0022421 |
| 1746248814 | 1975 | 1975 | The Happy Hooker                         | The Happy Hooker                         | Sgarro, Nicholas                   | Nicholas Sgarro          | tt0073091 |
| 1746502880 | 1916 | 1916 | The Thousand Dollar Husband              | The Thousand Dollar Husband              | Young, James                       | James Young              | tt0007452 |
| 1746419979 | 1940 | 1940 | Wolf of New York                         | Wolf of New York                         | McGann, William                    | William C. McGann        | tt0033270 |
| 1746577191 | 1962 | 1962 | Gigot                                    | Gigot                                    | Kelly, Gene                        | Gene Kelly               | tt0056017 |
| 1746585391 | 1939 | 1939 | Winter Carnival                          | Winter Carnival                          | Riesner, Charles F.                | Charles Reisner          | tt0032132 |
| 1746408907 | 1985 | 1985 | Mask                                     | Mask                                     | Bogdanovich, Peter                 | Peter Bogdanovich        | tt0089560 |
| 1746500370 | 1924 | 1924 | The Guilty One                           | The Guilty One                           | Henabery, Joseph                   | Joseph Henabery          | tt0014963 |

|                   |             |             |                            |                            |                                         |                           |                  |
|-------------------|-------------|-------------|----------------------------|----------------------------|-----------------------------------------|---------------------------|------------------|
| 1746503656        | 1917        | 1917        | Should She Obey?           | Should She Obey?           | Siegmann, George A.                     | George Siegmann           | tt0182421        |
| 1746410395        | 1991        | 1991        | King Ralph                 | King Ralph                 | Ward, David S.                          | David S. Ward             | tt0102216        |
| 1746569607        | 1955        | 1955        | Pearl of the South Pacific | Pearl of the South Pacific | Dwan, Allan                             | Allan Dwan                | tt0048474        |
| 1746420214        | 1983        | 1983        | The Star Chamber           | The Star Chamber           | Hyams, Peter                            | Peter Hyams               | tt0086356        |
| 1746523278        | 1910        | 1910        | The Perversity of Fate     | The Perversity of Fate     |                                         | Sidney Olcott             | tt0393590        |
| 1746500458        | 1925        | 1925        | The Red Kimona             | The Red Kimona             | Lang, Walter                            | Walter Lang               | tt0016276        |
| 1746516130        | 1922        | 1922        | The Dungeon                | The Dungeon                | Micheaux, Oscar                         | Oscar Micheaux            | tt0130644        |
| 1746523335        | 1927        | 1927        | Blazing Days               | Blazing Days               | Wyler, William                          | William Wyler             | tt0017682        |
| 1746198745        | 1967        | 1967        | Good Times                 | Good Times                 | Friedkin, William                       | William Friedkin          | tt0061720        |
| 1746408671        | 1986        | 1986        | Band of the Hand           | Band of the Hand           | Glaser, Paul Michael                    | Paul Michael Glaser       | tt0090693        |
| 1746561876        | 1956        | 1956        | Dakota Incident            | Dakota Incident            | Foster, Lewis R.                        | Lewis R. Foster           | tt0049118        |
| 1746464797        | 1940        | 1940        | The Man from Tumbleweeds   | The Man from Tumbleweeds   | Lewis, Joseph H.                        | Joseph H. Lewis           | tt0032750        |
| 1746421312        | 1999        | 1999        | The Limey                  | The Limey                  | Soderbergh, Steven                      | Steven Soderbergh         | tt0165854        |
| 1746508880        | 1926        | 1926        | The Waning Sex             | The Waning Sex             | Leonard, Robert Z.                      | Robert Z. Leonard         | tt0017526        |
| 1746566206        | 1953        | 1953        | The Sea Around Us          | The Sea Around Us          | Allen, Irwin                            | Irwin Allen               | tt0044009        |
| 1746524117        | 1927        | 1927        | The Broken Gate            | The Broken Gate            | McKay, James C.                         | James C. McKay            | tt0017707        |
| 1746580690        | 1936        | 1936        | Go-Get-'Em-Haines          | Go Get 'Em, Haines         | Newfield, Sam                           | Sam Newfield              | tt0164611        |
| 1746200200        | 1969        | 1969        | King, Murray               | King, Murray               | Hoffman, David; Gordon, Jonathan        | Jonathan Gordon           | tt0064544        |
| 1746583606        | 1930        | 1930        | Conspiracy                 | Conspiracy                 | Cabanne, Christy                        | Christy Cabanne           | tt0020785        |
| 1746249048        | 1973        | 1973        | Steel Arena                | Steel Arena                | Lester, Mark L.                         | Mark L. Lester            | tt0070730        |
| 1746562247        | 1953        | 1953        | The Magnetic Monster       | The Magnetic Monster       | Siodmak, Curt                           | Curt Siodmak              | tt0046026        |
| 1746454388        | 1943        | 1943        | Thundering Trails          | Thundering Trails          | English, John                           | John English              | tt0036437        |
| 1746524591        | 1914        | 1914        | The Only Son               | The Only Son               | DeMille, Cecil B.; Apfel, Oscar; Mille, | Oscar Apfel               | tt0004434        |
| 1746455826        | 1998        | 1998        | Senseless                  | Senseless                  | Spheeris, Penelope                      | Penelope Spheeris         | tt0120820        |
| 1746410216        | 1981        | 1981        | Caveman                    | Caveman                    | Gottlieb, Carl                          | Carl Gottlieb             | tt0082146        |
| 1746515025        | 1916        | 1916        | The Blue Envelope Mystery  | The Blue Envelope Mystery  | North, Wilfrid                          | Wilfrid North             | tt0006442        |
| 1746555761        | 1957        | 1957        | Mister Rock and Roll       | Mister Rock and Roll       | Dubin, Charles                          | Charles S. Dubin          | tt0050711        |
| 1746499996        | 1949        | 1949        | Lost Boundaries            | Lost Boundaries            | Werker, Alfred L.                       | Alfred L. Werker          | tt0041600        |
| 1746492864        | 1947        | 1947        | Buck Privates Come Home    | Buck Privates Come Home    | Barton, Charles T.                      | Charles Barton            | tt0039226        |
| 1746437265        | 1941        | 1941        | The Officer and the Lady   | The Officer and the Lady   | White, Sam                              | Sam White                 | tt0033971        |
| 1746571444        | 1932        | 1932        | Those We Love              | Those We Love              | Florey, Robert                          | Robert Florey             | tt0023587        |
| 1769970044        | 1912        | 1912        | The Passing                | The Passing                | Nichols, George O.                      | George Nichols            | tt0414354        |
| 1746474494        | 1944        | 1944        | Lady in the Death House    | Lady in the Death House    | Sekely, Steve                           | Steve Sekely              | tt0037001        |
| 1746566341        | 1954        | 1953        | Crime Wave                 | Crime Wave                 | DeToth, Andre                           | André De Toth             | tt0046878        |
| 1746515085        | 1918        | 1918        | Blindfolded                | Blindfolded                | West, Raymond B.                        | Raymond B. West           | tt0182836        |
| 1746420989        | 1992        | 1992        | Stay Tuned                 | Stay Tuned                 | Hyams, Peter                            | Peter Hyams               | tt0105466        |
| 1746523365        | 1915        | 1915        | Double Trouble             | Double Trouble             | Cabanne, William Christy                | Christy Cabanne           | tt0005214        |
| 1746409998        | 1981        | 1981        | Bustin' Loose              | Bustin' Loose              | Scott, Oz                               | Oz Scott                  | tt0082121        |
| <b>1746502168</b> | <b>1922</b> | <b>1922</b> | <b>French Heels</b>        | <b>French Heels</b>        | <b>Hollywood, Edwin L.</b>              | <b>Edwin L. Hollywood</b> | <b>tt0013154</b> |
| 1746515777        | 1922        | 1922        | The Cub Reporter           | The Cub Reporter           | Dillon, Jack                            | John Francis Dillon       | tt0013042        |
| 1746577058        | 1951        | 1950        | Everybody's Girl           | Everybody's Girl           |                                         | Lillian Hunt              | tt0136823        |
| 1745342193        | 2010        | 2010        | Paranormal Activity 2      | Paranormal Activity 2      | Williams, Tod                           | Tod Williams              | tt1536044        |
| 1746516630        | 1921        | 1921        | Miss 139                   | Miss 139                   | Rolfe, B. A.                            | B.A. Rolfe                | tt0133971        |
| 1746421616        | 1991        | 1991        | Grand Canyon               | Grand Canyon               | Kasdan, Lawrence                        | Lawrence Kasdan           | tt0101969        |
| 1745272488        | 2000        | 2000        | 28 Days                    | 28 Days                    | Thomas, Betty                           | Betty Thomas              | tt0191754        |
| 1746454676        | 1944        | 1944        | Casanova Brown             | Casanova Brown             | Wood, Sam                               | Sam Wood                  | tt0036699        |
| 1746566326        | 1953        | 1953        | The Story of Three Loves   | The Story of Three Loves   |                                         | Vincente Minnelli         | tt0046374        |
| 1746574561        | 1936        | 1936        | Jaws of the Jungle         | Jaws of the Jungle         |                                         | Eddie Granemann           | tt0126184        |
| 1746485047        | 1918        | 1918        | Tempered Steel             | Tempered Steel             | Ince, Ralph                             | Ralph Ince                | tt0009685        |
| 1746582348        | 1930        | 1930        | Girl of the Port           | Girl of the Port           | Glennon, Bert                           | Bert Glennon              | tt0020922        |
| 1746504414        | 1917        | 1917        | The Show Down              | The Show Down              | Reynolds, Lynn F.                       | Lynn Reynolds             | tt0008568        |
| 1746394474        | 1992        | 1992        | Single White Female        | Single White Female        | Schroeder, Barbet                       | Barbet Schroeder          | tt0105414        |
| 1746408445        | 1985        | 1985        | Murphy's Romance           | Murphy's Romance           | Ritt, Martin                            | Martin Ritt               | tt0089643        |
| 1746578713        | 1960        | 1960        | Squad Car                  | Squad Car                  | Leftwich, Ed                            | Ed Leftwich               | tt0055472        |
| 1746235684        | 1978        | 1978        | Every Which Way But Loose  | Every Which Way But Loose  | Fargo, James                            | James Fargo               | tt0077523        |
| 1746569611        | 1953        | 1953        | Second Chance              | Second Chance              | Maté, Rudy                              | Rudolph Maté              | tt0046288        |
| 1746578914        | 1951        | 1951        | Mister Universe            | Mister Universe            | Lerner, Joseph                          | Joseph Lerner             | tt0043823        |

|            |      |      |                           |                           |                                     |                                     |           |
|------------|------|------|---------------------------|---------------------------|-------------------------------------|-------------------------------------|-----------|
| 1746419780 | 1982 | 1982 | Parasite                  | Parasite                  | Band, Charles                       | Charles Band                        | tt0084472 |
| 1746393972 | 1987 | 1987 | Fatal Beauty              | Fatal Beauty              | Holland, Tom                        | Tom Holland                         | tt0093011 |
| 1746561801 | 1955 | 1955 | Killer's Kiss             | Killer's Kiss             | Kubrick, Stanley                    | Stanley Kubrick                     | tt0048254 |
| 1746184112 | 1910 | 1910 | The Bad Man's Last Deed   | The Bad Man's Last Deed   | Anderson, G. M.                     | Gilbert M. 'Broncho Billy' Anderson | tt0001125 |
| 1746473892 | 1944 | 1944 | Take It Big               | Take It Big               | McDonald, Frank                     | Frank McDonald                      | tt0037340 |
| 1746409245 | 1989 | 1989 | Second Sight              | Second Sight              | Zwick, Joel                         | Joel Zwick                          | tt0098276 |
| 1746500305 | 1925 | 1925 | Kivalina of the Ice Lands | Kivalina of the Ice Lands | Rossman, Earl                       | Earl Rossman                        | tt0333730 |
| 1746524955 | 1927 | 1927 | For Ladies Only           | For Ladies Only           | Pembroke, Scott; Lehrman, Henry     | Henry Lehrman                       | tt0017897 |
| 1746436239 | 1990 | 1989 | Blue Steel                | Blue Steel                | Bigelow, Kathryn                    | Kathryn Bigelow                     | tt0099160 |
| 1746578672 | 1958 | 1958 | Home Before Dark          | Home Before Dark          | LeRoy, Mervyn                       | Mervyn LeRoy                        | tt0051732 |
| 1769977747 | 1986 | 1986 | Club Life                 | Club Life                 | Vane, Norman Thaddeus               | Norman Thaddeus Vane                | tt0088929 |
| 1745393818 | 2009 | 2009 | Taking Woodstock          | Taking Woodstock          | Lee, Ang                            | Ang Lee                             | tt1127896 |
| 1746577490 | 1959 | 1959 | Alias Jesse James         | Alias Jesse James         | McLeod, Norman Z.                   | Norman Z. McLeod                    | tt0052545 |
| 1746453636 | 1943 | 1944 | Know Your Ally: Britain   | Know Your Ally: Britain   |                                     | Anthony Veiller                     | tt1128215 |
| 1746509052 | 1925 | 1925 | Seven Sinners             | Seven Sinners             | Milestone, Lewis                    | Lewis Milestone                     | tt0016334 |
| 1746574713 | 1933 | 1933 | Meet the Baron            | Meet the Baron            | Lang, Walter                        | Walter Lang                         | tt0024320 |
| 1746562167 | 1956 | 1956 | Bandido                   | Bandido!                  | Fleischer, Richard                  | Richard Fleischer                   | tt0048983 |
| 1746584811 | 1929 | 1928 | The Shady Lady            | The Shady Lady            | Griffith, Edward H.                 | Edward H. Griffith                  | tt0020391 |
| 1746584349 | 1936 | 1936 | Little Lord Fauntleroy    | Little Lord Fauntleroy    | Cromwell, John                      | John Cromwell                       | tt0027893 |
| 1746465192 | 1942 | 1942 | Undercover Man            | Undercover Man            | Selander, Lesley                    | Lesley Selander                     | tt0035487 |
| 1746585131 | 1928 | 1928 | Honeymoon                 | Honeymoon                 | Golden, Robert A.                   | Robert A. Golden                    | tt0019016 |
| 1769974305 | 1916 | 1916 | The Manicure Girl         | The Manicure Girl         | King, Burton L.                     | Burton L. King                      | tt0812308 |
| 1746502921 | 1923 | 1923 | Flaming Youth             | Flaming Youth             | Dillon, John Francis                | John Francis Dillon                 | tt0014045 |
| 1746524450 | 1916 | 1916 | The Pretenders            | The Pretenders            | Baker, George D.; Hundt, Charles J. | Bobby Burns                         | tt0922567 |
| 1746464869 | 1942 | 1942 | Danger in the Pacific     | Danger in the Pacific     | Collins, Lewis D.                   | Lewis D. Collins                    | tt0034633 |
| 1746487133 | 1919 | 1919 | The Girl Dodger           | The Girl Dodger           | Storm, Jerome                       | Jerome Storm                        | tt0010167 |
| 1746584326 | 1937 | 1937 | The Man Who Found Himself | The Man Who Found Himself | Landers, Lew                        | Lew Landers                         | tt0028603 |
| 1746584796 | 1929 | 1929 | Young Nowheres            | Young Nowheres            | Lloyd, Frank                        | Frank Lloyd                         | tt0020612 |
| 1746475281 | 1946 | 1946 | Accomplice                | Accomplice                | Colmes, Walter                      | Walter Colmes                       | tt0038285 |
| 1746235609 | 1973 | 1973 | Jimi Hendrix              | Jimi Hendrix              |                                     | Joe Boyd                            | tt0070242 |
| 1746408495 | 1981 | 1980 | Maniac                    | Maniac                    | Lustig, William                     | William Lustig                      | tt0081114 |
| 1746581060 | 1951 | 1951 | The Prowler               | The Prowler               | Losey, Joseph                       | Joseph Losey                        | tt0043938 |
| 1746434941 | 1990 | 1990 | Hamlet                    | Hamlet                    | Zeffirelli, Franco                  | Franco Zeffirelli                   | tt0099726 |
| 1746500369 | 1926 | 1926 | Prowlers of the Night     | Prowlers of the Night     | Laemmle, Ernst                      | Ernst Laemmle                       | tt0017294 |
| 1746585009 | 1940 | 1940 | The Long Voyage Home      | The Long Voyage Home      | Ford, John                          | John Ford                           | tt0032728 |
| 1746504111 | 1920 | 1920 | The Hidden Code           | The Hidden Code           | L'Estrange, Richard                 | Richard L'Estrange                  | tt0195780 |
| 1746582222 | 1931 | 1931 | Smart Woman               | Smart Woman               | La Cava, Gregory                    | Gregory La Cava                     | tt0022404 |
| 1746474413 | 1947 | 1947 | Beat the Band             | Beat the Band             | Auer, John H.                       | John H. Auer                        | tt0039177 |
| 1746582679 | 1937 | 1937 | Circus Girl               | Circus Girl               | Auer, John H.                       | John H. Auer                        | tt0028719 |
| 1746578568 | 1961 | 1961 | Back Street               | Back Street               | Miller, David                       | David Miller                        | tt0054653 |
| 1746248059 | 1967 | 1967 | Come Spy with Me          | Come Spy with Me          | Stone, Marshall                     | Marshall Stone                      | tt0061498 |
| 1746495861 | 1920 | 1920 | While New York Sleeps     | While New York Sleeps     | Brabin, Charles J.                  | Charles Brabin                      | tt0011855 |
| 1746455000 | 1997 | 1997 | Good Will Hunting         | Good Will Hunting         | Van Sant, Gus                       | Gus Van Sant                        | tt0119217 |
| 1746571939 | 1932 | 1932 | The Local Bad Man         | The Local Bad Man         | Brower, Otto                        | Otto Brower                         | tt0023144 |
| 1746524147 | 1915 | 1915 | The Absentee              | The Absentee              | Cabanne, William Christy            | Christy Cabanne                     | tt0004854 |
| 1746574786 | 1936 | 1936 | In His Steps              | In His Steps              | Brown, Karl                         | Karl Brown                          | tt0027792 |
| 1746571256 | 1934 | 1934 | Blue Steel                | Blue Steel                | Bradbury, Robert                    | Robert N. Bradbury                  | tt0024902 |
| 1746483876 | 1919 | 1919 | It's a Bear               | It's a Bear               | Windom, Lawrence                    | Lawrence C. Windom                  | tt0190488 |
| 1746520235 | 1949 | 1948 | One Sunday Afternoon      | One Sunday Afternoon      | Walsh, Raoul                        | Raoul Walsh                         | tt0040668 |
| 1746579031 | 1961 | 1961 | Flight That Disappeared   | Flight That Disappeared   | Le Borg, Reginald                   | Reginald Le Borg                    | tt0054881 |
| 1746524021 | 1910 | 1910 | The Sergeant              | The Sergeant              | Boggs, Francis                      | Francis Boggs                       | tt1380196 |
| 1746455859 | 1996 | 1996 | Mulholland Falls          | Mulholland Falls          | Tamahori, Lee                       | Lee Tamahori                        | tt0117107 |
| 1746199528 | 1969 | 1969 | The Wildest!              | The Wildest!              | Sully, Jim                          | Jim Sully                           | tt0261415 |
| 1746455767 | 1996 | 1996 | A Very Brady Sequel       | A Very Brady Sequel       | Sanford, Arlene                     | Arlene Sanford                      | tt0118073 |
| 1746581774 | 1928 | 1928 | The Patsy                 | The Patsy                 | Vidor, King                         | King Vidor                          | tt0019258 |
| 1746561819 | 1955 | 1956 | Jungle Hell               | Jungle Hell               | Cerf, Norman A.                     | Norman A. Cerf                      | tt0049389 |
| 1746574126 | 1963 | 1963 | Girl in Trouble           | Girl in Trouble           | Beale, Lee                          | Brandon Chase                       | tt0127575 |

|            |      |      |                                                    |                                              |                                |                        |           |
|------------|------|------|----------------------------------------------------|----------------------------------------------|--------------------------------|------------------------|-----------|
| 1746508186 | 1949 | 1949 | Red, Hot and Blue                                  | Red, Hot and Blue                            | Farrow, John                   | John Farrow            | tt0041795 |
| 1746499938 | 1948 | 1948 | Adventures of Casanova                             | Adventures of Casanova                       | Galvaldón, Roberto             | Roberto Gavaldón       | tt0040075 |
| 1746408851 | 1988 | 1988 | The In Crowd                                       | The In Crowd                                 | Rosenthal, Mark                | Mark Rosenthal         | tt0095362 |
| 1746475963 | 1943 | 1943 | Song of Texas                                      | Song of Texas                                | Kane, Joseph                   | Joseph Kane            | tt0036379 |
| 1746487621 | 1918 | 1918 | Johanna Enlists                                    | Johanna Enlists                              | Taylor, William D.             | William Desmond Taylor | tt0009241 |
| 1746575054 | 1935 | 1935 | Bright Lights                                      | Bright Lights                                | Berkeley, Busby                | Busby Berkeley         | tt0026139 |
| 1746250196 | 1979 | 1979 | The Prisoner of Zenda                              | The Prisoner of Zenda                        | Quine, Richard                 | Richard Quine          | tt0079753 |
| 1746421005 | 1998 | 1998 | High Art                                           | High Art                                     | Cholodenko, Lisa               | Lisa Cholodenko        | tt0139362 |
| 1746570966 | 1934 | 1934 | Now and Forever                                    | Now and Forever                              | Hathaway, Henry                | Henry Hathaway         | tt0025580 |
| 1746564780 | 1952 | 1952 | The Black Castle                                   | The Black Castle                             | Juran, Nathan                  | Nathan Juran           | tt0044423 |
| 1746583881 | 1928 | 1928 | Celebrity                                          | Celebrity                                    | Garnett, Tay                   | Tay Garnett            | tt0018753 |
| 1746580604 | 1935 | 1935 | Mary Jane's Pa                                     | Mary Jane's Pa                               | Keighley, William              | William Keighley       | tt0026689 |
| 1746435888 | 1998 | 1998 | Lethal Weapon 4                                    | Lethal Weapon 4                              | Donner, Richard                | Richard Donner         | tt0122151 |
| 1746453552 | 1941 | 1941 | The Lone Rider in Ghost Town                       | The Lone Rider in Ghost Town                 | Newfield, Sam                  | Sam Newfield           | tt0033846 |
| 1745340010 | 2002 | 2002 | Pipe Dream                                         | Pipe Dream                                   | Walsh, John C.                 | John Walsh             | tt0164810 |
| 1746516296 | 1921 | 1921 | The Duke of Chimney Butte                          | The Duke of Chimney Butte                    | Borzage, Frank                 | Frank Borzage          | tt0012127 |
| 1746582481 | 1938 | 1938 | Tarzan's Revenge                                   | Tarzan's Revenge                             | Lederman, D. Ross              | D. Ross Lederman       | tt0030833 |
| 1746516101 | 1922 | 1922 | East Is West                                       | East Is West                                 | Franklin, Sidney               | Sidney Franklin        | tt0013093 |
| 1746580310 | 1936 | 1936 | High Tension                                       | High Tension                                 | Dwan, Allan                    | Allan Dwan             | tt0027742 |
| 1745395684 | 2009 | 2009 | 17 Again                                           | 17 Again                                     | Steers, Burr                   | Burr Steers            | tt0974661 |
| 1746508105 | 1949 | 1949 | Abbott and Costello Meet the Killer: Boris Karloff | Abbott and Costello Meet the Killer, Boris K | Barton, Charles T.             | Charles Barton         | tt0041085 |
| 1746465168 | 1942 | 1942 | Bombay Clipper                                     | Bombay Clipper                               | Rawlins, John                  | John Rawlins           | tt0034537 |
| 1746465214 | 1946 | 1946 | Decoy                                              | Decoy                                        | Bernhard, Jack                 | Jack Bernhard          | tt0038462 |
| 1746583601 | 1929 | 1929 | The Cowboy and the Outlaw                          | The Cowboy and the Outlaw                    | McGowan, J. P.                 | J. P. McGowan          | tt0019790 |
| 1746567940 | 1933 | 1933 | Tonight Is Ours                                    | Tonight Is Ours                              | Walker, Stuart                 | Stuart Walker          | tt0024680 |
| 1746524256 | 1927 | 1927 | Bitter Apples                                      | Bitter Apples                                | Hoyt, Harry O.                 | Harry O. Hoyt          | tt0017676 |
| 1746577945 | 1935 | 1935 | The Code of the Mounted                            | Code of the Mounted                          | Newfield, Sam                  | Sam Newfield           | tt0026223 |
| 1746197938 | 1969 | 1969 | The Big Bounce                                     | The Big Bounce                               | March, Alex                    | Alex March             | tt0064087 |
| 1746453782 | 1942 | 1942 | Man from Cheyenne                                  | Man from Cheyenne                            | Kane, Joseph                   | Joseph Kane            | tt0035025 |
| 1746566063 | 1955 | 1955 | The Gun That Won the West                          | The Gun That Won the West                    | Castle, William                | William Castle         | tt0048139 |
| 1745374401 | 2002 | 2002 | The Sum of All Fears                               | The Sum of All Fears                         | Robinson, Phil Alden           | Phil Alden Robinson    | tt0164184 |
| 1746577786 | 1937 | 1937 | Rustler's Valley                                   | Rustler's Valley                             | Watt, Nate                     | Nate Watt              | tt0029505 |
| 1746394003 | 1986 | 1986 | CrawlSpace                                         | CrawlSpace                                   | Schmoeller, David              | David Schmoeller       | tt0090881 |
| 1746561615 | 1965 | 1965 | Black Spurs                                        | Black Spurs                                  | Springsteen, R. G.             | R. G. Springsteen      | tt0058976 |
| 1746474536 | 1947 | 1947 | Christmas Eve                                      | Christmas Eve                                | Marin, Edwin L.                | Edwin L. Marin         | tt0039266 |
| 1746561983 | 1955 | 1955 | Lay That Rifle Down                                | Lay That Rifle Down                          | Lamont, Charles                | Charles Lamont         | tt0048290 |
| 1746577744 | 1937 | 1937 | When You're in Love                                | When You're in Love                          | Riskin, Robert; Lachman, Harry | Robert Riskin          | tt0029761 |
| 1746570085 | 1933 | 1933 | I'm No Angel                                       | I'm No Angel                                 | Ruggles, Wesley                | Wesley Ruggles         | tt0024166 |
| 1746501198 | 1915 | 1915 | The Greater Will                                   | The Greater Will                             | Knoles, Harley                 | Harley Knoles          | tt0004901 |
| 1746520572 | 1925 | 1925 | Red Blood and Blue                                 | Red Blood and Blue                           | Hutchinson, James C.           | James C. Hutchinson    | tt0016274 |
| 1746454498 | 1942 | 1941 | Remember the Day                                   | Remember the Day                             | King, Henry                    | Henry King             | tt0034092 |
| 1746574509 | 1933 | 1933 | What Price Decency?                                | What Price Decency                           | Gregor, Arthur                 | Arthur Gregor          | tt0024760 |
| 1746583471 | 1951 | 1951 | I'd Climb the Highest Mountain                     | I'd Climb the Highest Mountain               | King, Henry                    | Henry King             | tt0043667 |
| 1746500127 | 1925 | 1925 | Ridin' Pretty                                      | Ridin' Pretty                                | Rosson, Arthur                 | Arthur Rosson          | tt0016290 |
| 1746512604 | 1917 | 1917 | Fear Not                                           | Fear Not                                     | Holubar, Allen J.              | Allen Holubar          | tt0007935 |
| 1746566054 | 1956 | 1955 | Hell on Frisco Bay                                 | Hell on Frisco Bay                           | Tuttle, Frank                  | Frank Tuttle           | tt0048158 |
| 1746581690 | 1929 | 1929 | Half-way to Heaven                                 | Half-way to Heaven                           | Abbott, George                 | George Abbott          | tt0019958 |
| 1746523548 | 1927 | 1926 | The Dice Woman                                     | The Dice Woman                               | Dillon, Edward                 | Edward Dillon          | tt0017811 |
| 1746500682 | 1924 | 1924 | Turned Up                                          | Turned Up                                    | Chapin, James                  | James Chapin           | tt0174290 |
| 1746582420 | 1935 | 1935 | Millions in the Air                                | Millions in the Air                          | McCarey, Ray                   | Ray McCarey            | tt0026716 |
| 1746497562 | 1918 | 1918 | A Pair of Sixes                                    | A Pair of Sixes                              | Windom, Lawrence C.            | Lawrence C. Windom     | tt0187383 |
| 1746438974 | 1941 | 1941 | Hold That Ghost                                    | Hold That Ghost                              | Lubin, Arthur                  | Arthur Lubin           | tt0033723 |
| 1746583839 | 1929 | 1929 | Divorce Made Easy                                  | Divorce Made Easy                            |                                | Neal Burns             | tt0019826 |
| 1746574288 | 1961 | 1961 | The Pleasure of His Company                        | The Pleasure of His Company                  | Seaton, George                 | George Seaton          | tt0055307 |
| 1746394012 | 1984 | 1984 | Irreconcilable Differences                         | Irreconcilable Differences                   | Shyer, Charles                 | Charles Shyer          | tt0087482 |
| 1746577392 | 1961 | 1960 | Wild Youth                                         | Wild Youth                                   | Schreyer, John                 | John F. Schreyer       | tt0053098 |
| 1746582997 | 1938 | 1938 | The Spy Ring                                       | The Spy Ring                                 | Lewis, Joseph H.               | Joseph H. Lewis        | tt0030784 |



|            |      |      |                              |                              |                                       |                       |           |
|------------|------|------|------------------------------|------------------------------|---------------------------------------|-----------------------|-----------|
| 1746581878 | 1910 | 1910 | The Golden Supper            | The Golden Supper            | Griffith, D. W.                       | D.W. Griffith         | tt0001237 |
| 1746583227 | 1929 | 1929 | Evangeline                   | Evangeline                   |                                       | Edwin Carewe          | tt0019856 |
| 1746520163 | 1948 | 1948 | Up in Central Park           | Up in Central Park           | Seiter, William A.                    | William A. Seiter     | tt0040925 |
| 1746514978 | 1910 | 1910 | Sentimental Sam              | Sentimental Sam              |                                       |                       | tt1804633 |
| 1746514975 | 1917 | 1917 | The Fires of Youth           | The Fires of Youth           | Chautard, Emile                       | Emile Chautard        | tt0194889 |
| 1746514475 | 1916 | 1916 | A Circus Romance             | A Circus Romance             | Seay, Charles M.                      | Charles M. Seay       | tt0006393 |
| 1746216808 | 1968 | 1968 | Petulia                      | Petulia                      | Lester, Richard                       | Richard Lester        | tt0063426 |
| 1746436341 | 1940 | 1940 | Wagon Train                  | Wagon Train                  | Killy, Edward                         | Edward Killy          | tt0033234 |
| 1746583756 | 1930 | 1930 | Cheer Up and Smile           | Cheer Up and Smile           | Lanfield, Sidney                      | Sidney Lanfield       | tt0020759 |
| 1746424178 | 1943 | 1943 | Cattle Stampede              | Cattle Stampede              | Newfield, Sam                         | Sam Newfield          | tt0035723 |
| 1746525127 | 1921 | 1921 | The Recoil                   | The Recoil                   | Moranti, Milburn                      | Milburn Morante       | tt0012614 |
| 1746578462 | 1962 | 1962 | Money in My Pocket           | Money in My Pocket           | Jourdan, Erven                        | Erven Jourdan         | tt0312975 |
| 1746217988 | 1966 | 1966 | Not With My Wife, You Don't! | Not with My Wife, You Don't! | Panama, Norman                        | Norman Panama         | tt0060760 |
| 1745293806 | 2006 | 2006 | The Night Listener           | The Night Listener           | Stettner, Patrick                     | Patrick Stettner      | tt0448075 |
| 1746438611 | 1943 | 1943 | The Mysterious Doctor        | The Mysterious Doctor        | Stoloff, Ben                          | Benjamin Stoloff      | tt0036187 |
| 1746513639 | 1923 | 1923 | The Brass Bottle             | The Brass Bottle             |                                       | Maurice Tourneur      | tt0013887 |
| 1746524395 | 1910 | 1910 | Two Gentlemen of the Road    | Two Gentlemen of the Road    |                                       |                       | tt1799145 |
| 1745359811 | 2003 | 2003 | American Splendor            | American Splendor            | Pulcini, Robert; Berman, Shari Sprin; | Shari Springer Berman | tt0305206 |
| 1746566770 | 1933 | 1933 | Phantom Thunderbolt          | Phantom Thunderbolt          | James, Alan                           | Alan James            | tt0024444 |
| 1746438625 | 1943 | 1943 | Frontier Fury                | Frontier Fury                | Berke, William                        | William Berke         | tt0035905 |
| 1746500233 | 1926 | 1926 | Wet Paint                    | Wet Paint                    | Rosson, Arthur                        | Arthur Rosson         | tt0017538 |
| 1746566367 | 1955 | 1955 | A Life at Stake              | A Life at Stake              | Guilfoyle, Paul                       | Paul Guilfoyle        | tt0047178 |
| 1746524376 | 1922 | 1922 | The Galloping Kid            | The Galloping Kid            | Ross, Nat                             | Nat Ross              | tt0013161 |
| 174632967  | 1915 | 1915 | When It Strikes Home         | When It Strikes Home         | Vekroff, Perry N.                     | Perry N. Vekroff      | tt0006270 |
| 1746580208 | 1938 | 1938 | Service De Luxe              | Service de Luxe              | Lee, Rowland V.                       | Rowland V. Lee        | tt0030732 |
| 1746566231 | 1956 | 1956 | Trapeze                      | Trapeze                      | Reed, Carol                           | Carol Reed            | tt0049875 |
| 1746439195 | 1998 | 1998 | The Truman Show              | The Truman Show              | Weir, Peter                           | Peter Weir            | tt0120382 |
| 1746454442 | 1942 | 1942 | Sunset Serenade              | Sunset Serenade              | Kane, Joseph                          | Joseph Kane           | tt0035396 |
| 1746584273 | 1939 | 1939 | North of the Yukon           | North of the Yukon           | Nelson, Sam                           | Sam Nelson            | tt0031733 |
| 1746566317 | 1954 | 1954 | Return to Treasure Island    | Return to Treasure Island    | Dupont, E. A.                         | Ewald André Dupont    | tt0047406 |
| 1746584120 | 1938 | 1938 | Hard to Get                  | Hard to Get                  | Enright, Ray                          | Ray Enright           | tt0030214 |
| 1746434251 | 1995 | 1995 | Fair Game                    | Fair Game                    | Sipes, Andrew                         | Andrew Sipes          | tt0113010 |
| 1746198513 | 1967 | 1967 | Luv                          | Luv                          | Donner, Clive                         | Clive Donner          | tt0061927 |
| 1746503445 | 1920 | 1920 | The Sea Wolf                 | The Sea Wolf                 | Melford, George                       | George Melford        | tt0011672 |
| 1746576897 | 1931 | 1931 | Inspiration                  | Inspiration                  | Brown, Clarence                       | Clarence Brown        | tt0022001 |
| 1746581179 | 1910 | 1910 | The Fur Coat                 | The Fur Coat                 |                                       |                       | tt0449268 |
| 1746393708 | 1982 | 1981 | Enter the Ninja              | Enter the Ninja              | Golan, Menahem                        | Menahem Golan         | tt0082332 |
| 1746464967 | 1946 | 1946 | Passkey to Danger            | Passkey to Danger            | Selander, Lesley                      | Lesley Selander       | tt0038828 |
| 1745340790 | 2003 | 2003 | From Justin to Kelly         | From Justin to Kelly         | Iscove, Robert                        | Robert Iscove         | tt0339034 |
| 1746524226 | 1923 | 1923 | The Rum Runners              | The Rum Runners              |                                       |                       | tt0159710 |
| 1746524733 | 1927 | 1927 | Husband Hunters              | Husband Hunters              | Adolfi, John G.                       | John G. Adolfi        | tt0018018 |
| 1746570830 | 1934 | 1934 | Flirtation Walk              | Flirtation Walk              | Borzage, Frank                        | Frank Borzage         | tt0025124 |
| 1746584495 | 1931 | 1931 | Maid to Order                | Maid to Order                | Clifton, Elmer                        | Elmer Clifton         | tt0022107 |
| 1746503304 | 1919 | 1919 | The Fall of Babylon          | The Fall of Babylon          | Griffith, D. W.                       | D.W. Griffith         | tt0010108 |
| 1746436044 | 1943 | 1943 | Hit the Ice                  | Hit the Ice                  | Lamont, Charles                       | Charles Lamont        | tt0036004 |
| 1745341740 | 2001 | 2001 | Hannibal                     | Hannibal                     | Scott, Ridley                         | Ridley Scott          | tt0212985 |
| 1746582473 | 1937 | 1937 | Sh! The Octopus              | Sh! The Octopus              | McGann, William                       | William C. McGann     | tt0029541 |
| 1746542760 | 1926 | 1926 | My Own Pal                   | My Own Pal                   | Blystone, John G.                     | John G. Blystone      | tt0017188 |
| 1746569814 | 1954 | 1954 | Rhapsody                     | Rhapsody                     | Vidor, Charles                        | Charles Vidor         | tt0047408 |
| 1746567083 | 1934 | 1934 | She Was a Lady               | She Was a Lady               | MacFadden, Hamilton                   | Hamilton MacFadden    | tt0025777 |
| 1746583631 | 1928 | 1928 | Drums of Love                | Drums of Love                | Griffith, D. W.                       | D.W. Griffith         | tt0018854 |
| 1746393486 | 1988 | 1988 | She's Having a Baby          | She's Having a Baby          | Hughes, John                          | John Hughes           | tt0096094 |
| 1746420049 | 1983 | 1983 | Under Fire                   | Under Fire                   | Spottiswoode, Roger                   | Roger Spottiswoode    | tt0086510 |
| 1746582196 | 1931 | 1931 | Partners of the Trail        | Partners of the Trail        | Fox, Wallace                          | Wallace Fox           | tt0022256 |
| 1746584241 | 1936 | 1936 | The Return of Sophie Lang    | The Return of Sophie Lang    | Archainbaud, George                   | George Archainbaud    | tt0028172 |
| 1745293781 | 2006 | 2005 | The Notorious Bettie Page    | The Notorious Bettie Page    | Harron, Mary                          | Mary Harron           | tt0404802 |
| 1746419775 | 1990 | 1990 | Lord of the Flies            | Lord of the Flies            | Hook, Harry                           | Harry Hook            | tt0100054 |

|            |      |      |                                    |                                    |                                                        |                      |           |
|------------|------|------|------------------------------------|------------------------------------|--------------------------------------------------------|----------------------|-----------|
| 1746487156 | 1918 | 1918 | Cecilia of the Pink Roses          | Cecilia of the Pink Roses          | Steger, Julius                                         | Julius Steger        | tt0008955 |
| 1746424445 | 1942 | 1942 | Thru Different Eyes                | Thru Different Eyes                | Loring, Thomas Z.                                      | Thomas Z. Loring     | tt0035437 |
| 1746571118 | 1935 | 1935 | Riddle Ranch                       | Riddle Ranch                       | Hutchison, Charles                                     | Charles Hutchison    | tt0137193 |
| 1746563773 | 1952 | 1952 | Eight Iron Men                     | Eight Iron Men                     | Dmytryk, Edward                                        | Edward Dmytryk       | tt0044579 |
| 1769970480 | 1967 | 1967 | Carmen, Baby                       | Carmen, Baby                       | Metzger, Radley                                        | Radley Metzger       | tt0061448 |
| 1746565993 | 1953 | 1953 | The 5000 Fingers of Dr. T          | The 5,000 Fingers of Dr. T.        | Rowland, Roy                                           | Roy Rowland          | tt0045464 |
| 1746582755 | 1936 | 1936 | The King Steps Out                 | The King Steps Out                 | Sternberg, Josef von                                   | Josef von Sternberg  | tt0027847 |
| 1746502926 | 1915 | 1915 | Four Feathers                      | Four Feathers                      | Dawley, J. Searle                                      | J. Searle Dawley     | tt0005353 |
| 1746208796 | 1968 | 1968 | The Wicked Dreams of Paula Schultz | The Wicked Dreams of Paula Schultz | Marshall, George                                       | George Marshall      | tt0063805 |
| 1746530770 | 1950 | 1950 | Big Timber                         | Big Timber                         | Yarbrough, Jean                                        | Jean Yarbrough       | tt0042251 |
| 1746576595 | 1931 | 1931 | Dude Ranch                         | Dude Ranch                         | Tuttle, Frank                                          | Frank Tuttle         | tt0021821 |
| 1746465404 | 1942 | 1942 | Scattergood Survives a Murder      | Scattergood Survives a Murder      | Cabanne, Christy                                       | Christy Cabanne      | tt0035293 |
| 1746492505 | 1944 | 1944 | Valley of Vengeance                | Valley of Vengeance                | Newfield, Sam                                          | Sam Newfield         | tt0037425 |
| 1746393429 | 1981 | 1981 | Heartbeeps                         | Heartbeeps                         | Arkush, Allan                                          | Allan Arkush         | tt0082507 |
| 1746583807 | 1930 | 1930 | Old English                        | Old English                        | Green, Alfred E.                                       | Alfred E. Green      | tt0021203 |
| 1746574326 | 1961 | 1961 | The Young Doctors                  | The Young Doctors                  | Karlson, Phil                                          | Phil Karlson         | tt0055632 |
| 1746524047 | 1916 | 1916 | Saving the Family Name             | Saving the Family Name             | Weber, Lois; Smalley, Phillips                         | Phillips Smalley     | tt0007299 |
| 1746585298 | 1929 | 1929 | The Spirit of Youth                | The Spirit of Youth                | Lang, Walter                                           | Walter Lang          | tt0020441 |
| 1746580922 | 1961 | 1960 | The Private Lives of Adam & Eve    | The Private Lives of Adam and Eve  | Zugsmitz, Albert; Rooney, Mickey                       | Mickey Rooney        | tt0055328 |
| 1746500379 | 1926 | 1926 | Code of the Northwest              | Code of the Northwest              | Mattison, Frank S.                                     | Frank S. Mattison    | tt0016731 |
| 1769970755 | 1915 | 1915 | The Sacred Tiger of Agra           | The Sacred Tiger of Agra           | Carleton, Lloyd B.                                     | Lloyd B. Carleton    | tt0759661 |
| 1746574544 | 1952 | 1952 | You For Me                         | You for Me                         | Weis, Don                                              | Don Weis             | tt0045345 |
| 1746584561 | 1930 | 1930 | Hold Everything                    | Hold Everything                    | Del Ruth, Roy                                          | Roy Del Ruth         | tt0020984 |
| 1746501600 | 1915 | 1915 | Fine Feathers                      | Fine Feathers                      | Golden, Joseph A.                                      | Joseph A. Golden     | tt0005327 |
| 1746584224 | 1938 | 1938 | The Girl Downstairs                | The Girl Downstairs                | Taugog, Norman                                         | Norman Taugog        | tt0030181 |
| 1746569634 | 1955 | 1955 | Land of the Pharaohs               | Land of the Pharaohs               | Hawks, Howard                                          | Howard Hawks         | tt0048283 |
| 1746577346 | 1958 | 1958 | The Saga of Hemp Brown             | The Saga of Hemp Brown             | Carlson, Richard                                       | Richard Carlson      | tt0053236 |
| 1745340178 | 2002 | 2002 | All About the Benjamins            | All About the Benjamins            | Bray, Kevin                                            | Kevin Bray           | tt0278295 |
| 1746567226 | 1934 | 1934 | Wild Cargo                         | Wild Cargo                         | Denis, Armand                                          | Armand Denis         | tt0025991 |
| 1746583181 | 1939 | 1939 | Career                             | Career                             | Jason, Leigh                                           | Leigh Jason          | tt0031139 |
| 1746507888 | 1926 | 1926 | The Savage                         | The Savage                         | Newmeyer, Fred                                         | Fred C. Newmeyer     | tt0017348 |
| 1746555831 | 1957 | 1957 | The Tattered Dress                 | The Tattered Dress                 | Arnold, Jack                                           | Jack Arnold          | tt0051058 |
| 1746508412 | 1926 | 1926 | The Silent Power                   | The Silent Power                   | O'Connor, Frank                                        | Frank O'Connor       | tt0017389 |
| 1746509199 | 1927 | 1927 | Life of an Actress                 | Life of an Actress                 | Nelson, Jack                                           | Jack Nelson          | tt0127653 |
| 1746454008 | 1942 | 1942 | Scorched Earth                     | The Scorched Earth                 |                                                        | Ben Mindingburg      | tt0141812 |
| 1746570875 | 1952 | 1952 | Battles of Chief Pontiac           | Battles of Chief Pontiac           | Feist, Felix                                           | Felix E. Feist       | tt0044400 |
| 1746567559 | 1952 | 1952 | Big Jim McLain                     | Big Jim McLain                     | Ludwig, Edward                                         | Edward Ludwig        | tt0044418 |
| 1746576018 | 1932 | 1932 | The Match King                     | The Match King                     | Bretherton, Howard; Keighley, Willi; Howard Bretherton | Howard Bretherton    | tt0023198 |
| 1746419785 | 1992 | 1992 | Chaplin                            | Chaplin                            | Attenborough, Richard                                  | Richard Attenborough | tt0103939 |
| 1746453603 | 1941 | 1941 | Lady from Louisiana                | Lady from Louisiana                | Vorhaus, Bernard                                       | Bernard Vorhaus      | tt0033808 |
| 1746578569 | 1950 | 1950 | The Vicious Years                  | The Vicious Years                  | Florey, Robert                                         | Robert Florey        | tt0043105 |
| 1746582510 | 1938 | 1938 | Flirting with Fate                 | Flirting with Fate                 | McDonald, Frank                                        | Frank McDonald       | tt0030142 |
| 1746437564 | 1997 | 1997 | Leave It to Beaver                 | Leave It to Beaver                 | Cadiff, Andy                                           | Andy Cadiff          | tt0119509 |
| 1746574028 | 1956 | 1956 | Rock Around the Clock              | Rock Around the Clock              | Sears, Fred F.                                         | Fred F. Sears        | tt0049682 |
| 1746439468 | 1944 | 1944 | Dangerous Passage                  | Dangerous Passage                  | Berke, William                                         | William Berke        | tt0036741 |
| 1746555020 | 1964 | 1964 | Flipper's New Adventure            | Flipper's New Adventure            | Benson, Leon                                           | Leon Benson          | tt0058105 |
| 1769976706 | 1929 | 1929 | Perfect Day                        | Perfect Day                        |                                                        | James Parrott        | tt0020264 |
| 1746500494 | 1925 | 1925 | Keep Smiling                       | Keep Smiling                       | Pratt, Gilbert W.; Austin, Albert                      | Albert Austin        | tt0015970 |
| 1745340520 | 2002 | 2002 | Sonny                              | Sonny                              | Cage, Nicolas                                          | Nicolas Cage         | tt0305973 |
| 1746512327 | 1914 | 1914 | The Man O' Warsman                 | The Man o' Warsman                 | Shea, Thomas E.                                        | Thomas E. Shea       | tt0004299 |
| 1746508069 | 1925 | 1925 | The Devil's Cargo                  | The Devil's Cargo                  | Fleming, Victor                                        | Victor Fleming       | tt0015749 |
| 1746185853 | 1969 | 1969 | The Minx                           | The Minx                           | Jacobs, Raymond                                        | Raymond Jacobs       | tt0064670 |
| 1746554863 | 1956 | 1956 | Huk!                               | Huk!                               | Barnwell, John                                         | John Barnwell        | tt0049343 |
| 1746409690 | 1987 | 1987 | Innerspace                         | Innerspace                         | Dante, Joe                                             | Joe Dante            | tt0093260 |
| 1746235462 | 1976 | 1976 | Project: Kill                      | Project: Kill                      | Girdler, William                                       | William Girdler      | tt0081382 |
| 1746516082 | 1922 | 1922 | The Pride of Palomar               | The Pride of Palomar               | Borzage, Frank                                         | Frank Borzage        | tt0013511 |
| 1746563803 | 1951 | 1951 | Mask of the Dragon                 | Mask of the Dragon                 | Newfield, Samuel                                       | Sam Newfield         | tt0043791 |

|            |      |      |                                     |                                       |                      |                        |           |
|------------|------|------|-------------------------------------|---------------------------------------|----------------------|------------------------|-----------|
| 1746503586 | 1921 | 1921 | A Divorce of Convenience            | A Divorce of Convenience              | Ellis, Robert        | Robert Ellis           | tt0012112 |
| 1746570400 | 1934 | 1934 | Madame Du Barry                     | Madame Du Barry                       | Dieterle, William    | William Dieterle       | tt0025443 |
| 1746454371 | 1942 | 1942 | Little Joe, the Wrangler            | Little Joe, the Wrangler              | Collins, Lewis D.    | Lewis D. Collins       | tt0034982 |
| 1746571006 | 1934 | 1934 | I Like It That Way                  | I Like It That Way                    | Lachman, Harry       | Harry Lachman          | tt0025283 |
| 1746502384 | 1916 | 1916 | Tongues of Men                      | The Tongues of Men                    | Lloyd, Frank         | Frank Lloyd            | tt0007467 |
| 1746454006 | 1944 | 1944 | The Yellow Rose of Texas            | The Yellow Rose of Texas              | Kane, Joseph         | Joseph Kane            | tt0037472 |
| 1745302571 | 2006 | 2006 | Bobby                               | Bobby                                 | Estevez, Emilio      | Emilio Estevez         | tt0308055 |
| 1746250943 | 1978 | 1978 | The Toolbox Murders                 | The Toolbox Murders                   | Donnelly, Dennis     | Dennis Donnelly        | tt0078405 |
| 1746501013 | 1914 | 1914 | The Woman Pays                      | The Woman Pays                        |                      | Eugene Moore           | tt0437630 |
| 1746508095 | 1925 | 1925 | Fighting the Flames                 | Fighting the Flames                   | Eason, Reeves        | B. Reeves Eason        | tt0015816 |
| 1746530771 | 1948 | 1948 | Boarding House Blues                | Boarding House Blues                  | Binney, Josh         | Josh Binney            | tt0040176 |
| 1746584465 | 1930 | 1930 | Sweeping Against the Winds          | Sweeping Against the Winds            |                      | Victor Adamson         | tt0167430 |
| 1746524445 | 1916 | 1916 | The People Vs. John Doe             | The People vs. John Doe               | Weber, Lois          | Lois Weber             | tt0007170 |
| 1746514742 | 1923 | 1923 | The Seventh Sheriff                 | The Seventh Sheriff                   | Hatton, Richard      | Dick Hatton            | tt0163212 |
| 1746524167 | 1923 | 1923 | The Range Patrol                    | The Range Patrol                      | Moody, H. G.         | Harry Moody            | tt0014396 |
| 1746485617 | 1918 | 1918 | The Curse of Iku                    | The Curse of Iku                      | Borzage, Frank       | Frank Borzage          | tt0008986 |
| 1746524033 | 1916 | 1915 | Vanity                              | Vanity                                | O'Brien, John B.     | Joseph De Grasse       | tt0327222 |
| 1746420967 | 1982 | 1982 | Chan Is Missing                     | Chan Is Missing                       | Wang, Wayne          | Wayne Wang             | tt0083728 |
| 1745393828 | 2009 | 2009 | Old Dogs                            | Old Dogs                              | Becker, Walt         | Jonathan Fahn          | tt1130090 |
| 1746577255 | 1951 | 1951 | The Rage of Burlesque               | The Rage of Burlesque                 | Vox, Albert          | Albert Vox             | tt7846958 |
| 1746500723 | 1950 | 1950 | The Eagle and the Hawk              | The Eagle and the Hawk                | Foster, Lewis R.     | Lewis R. Foster        | tt0042426 |
| 1746438326 | 1944 | 1944 | Raiders of the Border               | Raiders of the Border                 | McCarthy, John P.    | John P. McCarthy       | tt0037207 |
| 1746520409 | 1926 | 1926 | Pony Express Rider                  | Pony Express Rider                    | Horner, Robert J.    | Robert J. Horner       | tt0313489 |
| 1746520394 | 1925 | 1925 | Marcus Garland                      | Marcus Garland                        |                      | Oscar Micheaux         | tt0016090 |
| 1746577512 | 1937 | 1937 | Off to the Races                    | Off to the Races                      | Strayer, Frank R.    | Frank R. Strayer       | tt0029332 |
| 1746574600 | 1936 | 1936 | Revolt of the Zombies               | Revolt of the Zombies                 | Halperin, Victor     | Victor Halperin        | tt0028174 |
| 1746580815 | 1936 | 1936 | The Law Rides                       | The Law Rides                         | Bradbury, Robert N.  | Robert N. Bradbury     | tt0027873 |
| 1746574606 | 1935 | 1935 | The Cyclone Ranger                  | The Cyclone Ranger                    | Hill, Bob            | Robert F. Hill         | tt0026253 |
| 1746581112 | 1962 | 1962 | Girls on the Rocks                  | Girls on the Rocks                    | Santos, Anthony      | Manuel Conde           | tt0124668 |
| 1746574352 | 1959 | 1959 | Five Gates to Hell                  | Five Gates to Hell                    | Clavell, James       | James Clavell          | tt0052808 |
| 1746209883 | 1970 | 1970 | I Walk the Line                     | I Walk the Line                       | Frankenheimer, John  | John Frankenheimer     | tt0065874 |
| 1769971167 | 1969 | 1969 | The Bride and the Beasts            | The Bride and the Beasts              | Donne, John          | Donn Greer             | tt0211993 |
| 1746208831 | 1968 | 1969 | A Stranger in Town                  | A Stranger in Town                    | Lewis, Vance         | Earl J. Miller         | tt0126679 |
| 1746272154 | 1968 | 1968 | A Journey to Jerusalem              | Journey to Jerusalem                  | Mindlin, Michael     | David Maysles          | tt0128286 |
| 1769969342 | 1930 | 1930 | Harmonizing Songs                   | Harmonizing Songs                     |                      | Arthur Hurlley         | tt0122526 |
| 1746436245 | 1995 | 1995 | Out of Sync                         | Out of Sync                           | Allen, Debbie        | Debbie Allen           | tt0114068 |
| 1746209509 | 1965 | 1965 | Situation Hopeless--But Not Serious | Situation Hopeless... But Not Serious | Reinhardt, Gottfried | Gottfried Reinhardt    | tt0059724 |
| 1746233730 | 1966 | 1966 | ... And Now Miguel                  | And Now Miguel                        | Clark, James B.      | James B. Clark         | tt0060106 |
| 1746572598 | 1931 | 1931 | Waterloo Bridge                     | Waterloo Bridge                       | Whale, James         | James Whale            | tt0022550 |
| 1746570743 | 1934 | 1934 | Rawhide Romance                     | Rawhide Romance                       | Dixon, Denver        | Victor Adamson         | tt0181784 |
| 1746503402 | 1921 | 1921 | A Daughter of the Law               | A Daughter of the Law                 | Conway, Jack         | Grace Cunard           | tt0310980 |
| 1746582026 | 1910 | 1910 | Hugo, the Hunchback                 | Hugo the Hunchback                    |                      | William Nicholas Selig | tt0241544 |
| 1746525058 | 1921 | 1921 | A Sailor-Made Man                   | A Sailor Made Man                     | Newmeyer, Fred       | Fred C. Newmeyer       | tt0012642 |
| 1746581092 | 1961 | 1961 | Gold of the Seven Saints            | Gold of the Seven Saints              | Douglas, Gordon      | Gordon Douglas         | tt0054934 |
| 1746503302 | 1922 | 1922 | One Clear Call                      | One Clear Call                        | Stahl, John M.       | John M. Stahl          | tt0013456 |
| 1746497882 | 1922 | 1922 | Superstition                        | Superstition                          | Dwan, Allan          | Allan Dwan             | tt0013649 |
| 1746577111 | 1961 | 1961 | Two Rode Together                   | Two Rode Together                     | Ford, John           | John Ford              | tt0055558 |
| 1746436632 | 1940 | 1940 | Texas Renegades                     | Texas Renegades                       | Stewart, Peter       | Sam Newfield           | tt0033141 |
| 1746567789 | 1933 | 1933 | Rainbow over Broadway               | Rainbow Over Broadway                 | Thorpe, Richard      | Richard Thorpe         | tt0024486 |
| 1746581090 | 1960 | 1960 | The Secret of the Purple Reef       | The Secret of the Purple Reef         | Witney, William N.   | William Witney         | tt0054283 |
| 1746578560 | 1962 | 1962 | War Hunt                            | War Hunt                              | Sanders, Denis       | Denis Sanders          | tt0056675 |
| 1746582448 | 1936 | 1936 | Three Smart Girls                   | Three Smart Girls                     | Koster, Henry        | Henry Koster           | tt0028373 |
| 1746583049 | 1938 | 1937 | Sailing Along                       | Trailing Along                        | Hale, Sonnie         | Jean Yarbrough         | tt1158907 |
| 1746581079 | 1960 | 1960 | Valley of the Redwoods              | Valley of the Redwoods                | Witney, William N.   | William Witney         | tt0054435 |
| 1746573997 | 1962 | 1962 | Two Tickets to Paris                | Two Tickets to Paris                  | Garrison, Greg       | Greg Garrison          | tt0056624 |
| 1745342749 | 2009 | 2009 | I Hope They Serve Beer in Hell      | I Hope They Serve Beer in Hell        | Gosse, Bob           | Bob Gosse              | tt1220628 |
| 1745309451 | 2006 | 2006 | Akeelah and the Bee                 | Akeelah and the Bee                   | Atchison, Doug       | Doug Atchison          | tt0437800 |

|                   |             |             |                                                  |                                               |                                     |                        |                  |
|-------------------|-------------|-------------|--------------------------------------------------|-----------------------------------------------|-------------------------------------|------------------------|------------------|
| <b>1746393122</b> | <b>1986</b> | <b>1986</b> | <b>Psycho III</b>                                | <b>Psycho III</b>                             | <b>Perkins, Anthony</b>             | <b>Anthony Perkins</b> | <b>tt0091799</b> |
| 1746566225        | 1953        | 1953        | Tanga Tika                                       | Tanga Tika                                    | Long, Dwight                        | Dwight Long            | tt0131071        |
| 1746423758        | 1999        | 1999        | House on Haunted Hill                            | House on Haunted Hill                         | Malone, William                     | William Malone         | tt0185371        |
| 1746509569        | 1924        | 1924        | His Own Law                                      | His Own Law                                   |                                     |                        | tt0014993        |
| 1746497279        | 1918        | 1918        | The Red, Red Heart                               | The Red, Red Heart                            | Lucas, Wilfred                      | Wilfred Lucas          | tt0009540        |
| 1746585490        | 1939        | 1939        | Four Wives                                       | Four Wives                                    | Curtiz, Michael                     | Michael Curtiz         | tt0031336        |
| 1745374314        | 2008        | 2008        | Harold                                           | Harold                                        | Shannon, T. Sean                    | T. Sean Shannon        | tt1041753        |
| 1746523336        | 1927        | 1927        | The Cruel Truth                                  | The Cruel Truth                               | Rosen, Phil                         | Phil Rosen             | tt0017783        |
| 1746500036        | 1924        | 1924        | The Average Woman                                | The Average Woman                             | Cabanne, William Christy            | Christy Cabanne        | tt0014689        |
| 1746514437        | 1916        | 1916        | The Road to Love                                 | The Road to Love                              | Sidney, Scott                       | Scott Sidney           | tt0007267        |
| 1746574601        | 1935        | 1935        | Black Fury                                       | Black Fury                                    | Curtiz, Michael                     | Michael Curtiz         | tt0026121        |
| 1746554310        | 1964        | 1964        | The Beautiful, the Bloody, and the Bare          | The Beautiful, the Bloody, and the Bare       | Johnsen, Sande N.                   | Sande N. Johnsen       | tt0057876        |
| 1746577168        | 1951        | 1951        | Thunder on the Hill                              | Thunder on the Hill                           | Sirk, Douglas                       | Douglas Sirk           | tt0044128        |
| 1746260584        | 1978        | 1978        | Pretty Baby                                      | Pretty Baby                                   | Malle, Louis                        | Louis Malle            | tt0078111        |
| 1746583960        | 1928        | 1928        | Pass the Gravy                                   | Pass the Gravy                                | Guiol, Fred L.                      | Fred Guiol             | tt0019253        |
| 1746420962        | 1994        | 1994        | The Flintstones                                  | The Flintstones                               | Levant, Brian                       | Brian Levant           | tt0109813        |
| 1746514618        | 1923        | 1923        | The Temple of Venus                              | The Temple of Venus                           | Otto, Henry                         | Henry Otto             | tt0014528        |
| 1746520613        | 1926        | 1926        | Corporal Kate                                    | Corporal Kate                                 | Sloane, Paul                        | Paul Sloane            | tt0016743        |
| 1746454193        | 1998        | 1998        | Stepmom                                          | Stepmom                                       | Columbus, Chris                     | Chris Columbus         | tt0120686        |
| 1746475916        | 1945        | 1945        | Along Came Jones                                 | Along Came Jones                              | Heisler, Stuart                     | Stuart Heisler         | tt0037508        |
| 1746584413        | 1939        | 1939        | Indianapolis Speedway                            | Indianapolis Speedway                         | Bacon, Lloyd                        | Lloyd Bacon            | tt0031482        |
| 1746473917        | 1947        | 1947        | The Son of Rusty                                 | The Son of Rusty                              | Landers, Lew                        | Lew Landers            | tt0039848        |
| 1746233790        | 1966        | 1965        | John F. Kennedy: Years of Lightning, Day of Drun | John F. Kennedy: Years of Lightning, Day of L | Herschensohn, Bruce                 | Bruce Herschensohn     | tt0060562        |
| 1746200486        | 1969        | 1969        | Five Bloody Graves                               | Five Bloody Graves                            | Adamson, Al                         | Al Adamson             | tt0065723        |
| 1746438331        | 1942        | 1942        | The Sundown Kid                                  | The Sundown Kid                               | Clifton, Elmer                      | Elmer Clifton          | tt0035395        |
| 1746573951        | 1963        | 1963        | The Crawling Hand                                | The Crawling Hand                             | Strock, Herbert L.                  | Herbert L. Strock      | tt0056961        |
| 1746554523        | 1964        | 1964        | The Devil's Bedroom                              | The Devil's Bedroom                           | Jones, L. Q.                        | L.Q. Jones             | tt0058009        |
| 1746513792        | 1923        | 1923        | The Song of Love                                 | The Song of Love                              | Franklin, Chester; Marion, Frances  | Chester M. Franklin    | tt0013624        |
| 1746454171        | 1996        | 1996        | Ed                                               | Teeth                                         | Couturié, Bill                      | Nicholas Thurkettle    | tt0117871        |
| 1746465317        | 1945        | 1945        | Swing Out Sister                                 | Swing Out, Sister                             | Lilley, Edward                      | Edward C. Lilley       | tt0038142        |
| 1746422053        | 1940        | 1940        | He Stayed for Breakfast                          | He Stayed for Breakfast                       | Hall, Alexander                     | Alexander Hall         | tt0032576        |
| 1746454890        | 1996        | 1996        | The Long Kiss Goodnight                          | The Long Kiss Goodnight                       | Harlin, Renny                       | Renny Harlin           | tt0116908        |
| 1746530737        | 1948        | 1948        | The Walls of Jericho                             | The Walls of Jericho                          | Stahl, John M.                      | John M. Stahl          | tt0040949        |
| 1746249460        | 1977        | 1977        | September 30, 1955                               | September 30, 1955                            | Bridges, James                      | James Bridges          | tt0078231        |
| 1745293614        | 2006        | 2006        | The Devil Wears Prada                            | The Devil Wears Prada                         | Frankel, David                      | David Frankel          | tt0458352        |
| 1746560774        | 1932        | 1932        | Tex Takes a Holiday                              | Tex Takes a Holiday                           | Neitz, Alvin J.                     | Alan James             | tt0193559        |
| 1746465283        | 1942        | 1942        | Broadway Big Shot                                | Broadway Big Shot                             | Beaudine, William                   | William Beaudine       | tt0034550        |
| 1746503671        | 1919        | 1919        | God's Outlaw                                     | God's Outlaw                                  | Cabanne, William Christy            | Christy Cabanne        | tt0010179        |
| 1746582435        | 1936        | 1936        | Crash Donovan                                    | Crash Donovan                                 | Nigh, William; Laemmle, Edward      | William Nigh           | tt0027475        |
| 1746497914        | 1920        | 1920        | Polly of the Storm Country                       | Polly of the Storm Country                    | Rosson, Arthur H.                   | Arthur Rosson          | tt0011586        |
| 1746581135        | 1910        | 1910        | The Hand of Uncle Sam                            | The Hand of Uncle Sam                         | Ricketts, Thomas                    | Tom Ricketts           | tt0233843        |
| 1746574895        | 1933        | 1933        | High Gear                                        | High Gear                                     | Jason, Leigh                        | Leigh Jason            | tt0024119        |
| 1746532445        | 1913        | 1913        | In the Bishop's Carriage                         | In the Bishop's Carriage                      | Porter, Edwin S.; Dawley, J. Searle | J. Searle Dawley       | tt0030006        |
| 1746424000        | 1943        | 1943        | Blazing Frontier                                 | Blazing Frontier                              | Newfield, Sam                       | Sam Newfield           | tt0035680        |
| 1746454756        | 1996        | 1996        | The Substitute                                   | The Substitute                                | Mandel, Robert                      | Robert Mandel          | tt0117774        |
| 1746584422        | 1937        | 1937        | We Who Are About to Die                          | We Who Are About to Die                       | Cabanne, Christy                    | Christy Cabanne        | tt0028484        |
| 1746503876        | 1919        | 1919        | Stripped for a Million                           | Stripped for a Million                        | De La Parelle, L.                   | M. de la Parelle       | tt0192639        |
| 1746572106        | 1931        | 1931        | Wicked                                           | Wicked                                        | Dwan, Allan                         | Allan Dwan             | tt0022559        |
| 1746424012        | 1942        | 1942        | Daring Young Man                                 | The Daring Young Man                          | Strayer, Frank R.                   | Frank R. Strayer       | tt0035781        |
| 1746438446        | 1943        | 1943        | So This Is Washington                            | So This Is Washington                         | McCarey, Raymond                    | Ray McCarey            | tt0036368        |
| 1746199200        | 1967        | 1967        | Cottonpickin' Chickenpickers                     | Cottonpickin' Chickenpickers                  | Jackson, Larry E.                   | Larry E. Jackson       | tt0061522        |
| 1746504412        | 1921        | 1921        | The Freeze Out                                   | The Freeze Out                                | Ford, Jack                          | John Ford              | tt0012194        |
| 1745357735        | 2002        | 2002        | Ted Bundy                                        | Ted Bundy                                     | Bright, Matthew                     | Matthew Bright         | tt0284929        |
| 1746583263        | 1930        | 1930        | Follow Thru                                      | Follow Thru                                   | Schwab, Laurence; Corrigan, Lloyd   | Lloyd Corrigan         | tt0020894        |
| 1746408522        | 1982        | 1982        | Tex                                              | Q                                             | Hunter, Tim                         | Larry Cohen            | tt0084556        |
| 1746491836        | 1945        | 1945        | Junior Miss                                      | Junior Miss                                   | Seaton, George                      | George Seaton          | tt0037840        |
| 1746507598        | 1925        | 1925        | The Thoroughbred                                 | The Thoroughbred                              | Apfel, Oscar                        | Oscar Apfel            | tt0016423        |

|            |      |      |                               |                               |                                  |                                     |           |
|------------|------|------|-------------------------------|-------------------------------|----------------------------------|-------------------------------------|-----------|
| 1746420141 | 1993 | 1993 | Heart and Souls               | Heart and Souls               | Underwood, Ron                   | Ron Underwood                       | tt0107091 |
| 1746199748 | 1969 | 1969 | Going Down for the 3rd Time   | Going Down for the 3rd Time   | Goetz, Tommy                     | Tommy Goetz                         | tt0219700 |
| 1746393268 | 1984 | 1984 | The Pope of Greenwich Village | The Pope of Greenwich Village | Rosenberg, Stuart                | Stuart Rosenberg                    | tt0087932 |
| 1746250953 | 1977 | 1977 | Demon Seed                    | Demon Seed                    | Cammell, Donald                  | Donald Cammell                      | tt0075931 |
| 1746250153 | 1979 | 1978 | Dawn of the Dead              | Dawn of the Dead              | Romero, George A.                | George A. Romero                    | tt0077402 |
| 1769970791 | 1912 | 1912 | The Burglar's Reformation     | The Burglar's Reformation     | Terwilliger, George              | George Terwilliger                  | tt0358401 |
| 1745342473 | 2002 | 2002 | Halloween Resurrection        | Halloween: Resurrection       | Rosenthal, Rick                  | Rick Rosenthal                      | tt0220506 |
| 1746569953 | 1958 | 1958 | Attack of the 50 Foot Woman   | Attack of the 50 Foot Woman   | Hertz, Nathan                    | Nathan Juran                        | tt0051380 |
| 1746574529 | 1935 | 1935 | Wings in the Dark             | Wings in the Dark             | Flood, James                     | James Flood                         | tt0027221 |
| 1746584317 | 1940 | 1940 | They Knew What They Wanted    | They Knew What They Wanted    | Kanin, Garson                    | Garson Kanin                        | tt0033150 |
| 1769969538 | 1912 | 1912 | The Seal of Time              | The Seal of Time              | Taylor, Stanner E. V.            | Stanner E.V. Taylor                 | tt0359948 |
| 1746513675 | 1914 | 1914 | The Good-for-Nothing          | The Good for Nothing          | Anderson, George M.              | Gilbert M. 'Broncho Billy' Anderson | tt0004028 |
| 1746485940 | 1919 | 1919 | Lasca                         | Lasca                         | Dawn, Norman                     | Norman Dawn                         | tt0010341 |
| 1746421353 | 1994 | 1994 | When a Man Loves a Woman      | When a Man Loves a Woman      | Mandoki, Luis                    | Luis Mandoki                        | tt0111693 |
| 1746435151 | 1941 | 1941 | North from the Lone Star      | North from the Lone Star      | Hillyer, Lambert                 | Lambert Hillyer                     | tt0033960 |
| 1745302819 | 2007 | 2007 | Protagonist                   | Protagonist                   | Yu, Jessica                      | Jessica Yu                          | tt0905361 |
| 1746584187 | 1939 | 1939 | Swanee River                  | Swanee River                  | Lanfield, Sidney                 | Sidney Lanfield                     | tt0031996 |
| 1746420804 | 1996 | 1995 | Wild Bill: Hollywood Maverick | Wild Bill: Hollywood Maverick | Robinson, Todd                   | Todd Robinson                       | tt0114939 |
| 1745357601 | 2008 | 2008 | Disaster Movie                | Disaster Movie                | Friedberg, Jason; Seltzer, Aaron | Jason Friedberg                     | tt1213644 |
| 1746524174 | 1910 | 1910 | The Oath and the Man          | The Oath and the Man          | Griffith, D. W.                  | D.W. Griffith                       | tt0001340 |
| 1746500204 | 1924 | 1924 | The Alaskan                   | The Alaskan                   | Brenon, Herbert                  | Herbert Brenon                      | tt0014655 |
| 1746583316 | 1928 | 1928 | The Candy Kid                 | The Candy Kid                 | Kirkland, David                  | David Kirkland                      | tt0018745 |
| 1746423465 | 1989 | 1989 | See No Evil, Hear No Evil     | See No Evil, Hear No Evil     | Hiller, Arthur                   | Arthur Hiller                       | tt0098282 |
| 1746491817 | 1948 | 1948 | Fury at Furnace Creek         | Fury at Furnace Creek         | Humberstone, Bruce               | H. Bruce Humberstone                | tt0040380 |
| 1746435282 | 1997 | 1997 | Fools Rush In                 | Fools Rush In                 | Tennant, Andy                    | Andy Tennant                        | tt0119141 |
| 1746577709 | 1935 | 1935 | Rio Rattler                   | Rio Rattler                   | Shamray, Franklin                | Bernard B. Ray                      | tt0026935 |
| 1746508500 | 1925 | 1925 | Exchange of Wives             | Exchange of Wives             | Henley, Hobart                   | Hobart Henley                       | tt0015787 |
| 1745374408 | 2009 | 2009 | Jennifer's Body               | Jennifer's Body               | Kusama, Karyn                    | Karyn Kusama                        | tt1131734 |
| 1746409794 | 1988 | 1988 | The Accused                   | The Accused                   | Kaplan, Jonathan                 | Jonathan Kaplan                     | tt0094608 |
| 1746199723 | 1969 | 1969 | Weekend Lover                 | Weekend Lovers                | Avery, Dwayne                    | Dwayne Avery                        | tt0065199 |
| 1746555928 | 1955 | 1955 | The Virgin Queen              | The Virgin Queen              | Koster, Henry                    | Henry Koster                        | tt0048791 |
| 1746580870 | 1937 | 1937 | Trailin' Trouble              | Trailin' Trouble              | Rosson, Arthur                   | Arthur Rosson                       | tt0030889 |
| 1746422056 | 1999 | 1999 | Virus                         | Virus                         | Bruno, John                      | John Bruno                          | tt0120458 |
| 1746559930 | 1964 | 1964 | A Distant Trumpet             | A Distant Trumpet             | Walsh, Raoul                     | Raoul Walsh                         | tt0058019 |
| 1746584550 | 1930 | 1930 | Covered Wagon Trails          | Covered Wagon Trails          | McGowan, J. P.                   | J.P. McGowan                        | tt0020795 |
| 1746453599 | 1942 | 1942 | Jackass Mail                  | Jackass Mail                  | McLeod, Norman Z.                | Norman Z. McLeod                    | tt0034909 |
| 1746501593 | 1916 | 1916 | April                         | April                         | MacDonald, Donald                | Donald MacDonald                    | tt0006368 |
| 1746573888 | 1956 | 1956 | The Bottom of the Bottle      | The Bottom of the Bottle      | Hathaway, Henry                  | Henry Hathaway                      | tt0049027 |
| 1746516151 | 1920 | 1920 | An Adventuress                | An Adventuress                | Balshofer, Fred J.               | Fred J. Balshofer                   | tt0135475 |
| 1746562413 | 1957 | 1957 | Hot Rod Rumble                | Hot Rod Rumble                | Martinson, Leslie H.             | Leslie H. Martinson                 | tt0050523 |
| 1746583524 | 1930 | 1930 | Sweethearts and Wives         | Sweethearts and Wives         | Badger, Clarence                 | Clarence G. Badger                  | tt0021441 |
| 1746564797 | 1953 | 1953 | Cow Country                   | Cow Country                   | Selander, Lesley                 | Lesley Selander                     | tt0045653 |
| 1746582504 | 1938 | 1938 | Sky Giant                     | Sky Giant                     | Landers, Lew                     | Lew Landers                         | tt0030760 |
| 1746423040 | 1993 | 1993 | Hard Target                   | Hard Target                   | Woo, John                        | John Woo                            | tt0107076 |
| 1746235216 | 1977 | 1977 | The Other Side of Midnight    | The Other Side of Midnight    | Jarrott, Charles                 | Charles Jarrott                     | tt0076507 |
| 1746581163 | 1962 | 1962 | The Weird Ones                | The Weird Ones                |                                  | Pat Boyette                         | tt0056684 |
| 1746578663 | 1963 | 1963 | Greenwich Village Story       | Greenwich Village Story       | O'Connell, Jack                  | Jack O'Connell                      | tt0217523 |
| 1746219032 | 1972 | 1972 | The Culpepper Cattle Co.      | The Culpepper Cattle Co.      | Richards, Dick                   | Dick Richards                       | tt0068435 |
| 1746585453 | 1940 | 1940 | Boys of the City              | Boys of the City              | Lewis, Joseph H.                 | Joseph H. Lewis                     | tt0032277 |
| 1746511776 | 1916 | 1916 | A Message to Garcia           | A Message to Garcia           | Ridgely, Richard                 | Richard Ridgely                     | tt0163099 |
| 1746577101 | 1961 | 1961 | The Great Impostor            | The Great Impostor            | Mulligan, Robert                 | Robert Mulligan                     | tt0053879 |
| 1746574640 | 1937 | 1937 | Artists and Models            | Artists & Models              | Walsh, Raoul                     | Raoul Walsh                         | tt0028587 |
| 1746584428 | 1939 | 1939 | Two Gun Troubadour            | Two Gun Troubadour            | Johnson, Raymond K.              | Bernard B. Ray                      | tt0032068 |
| 1746554714 | 1964 | 1964 | 7 Faces of Dr. Lao            | 7 Faces of Dr. Lao            | Pal, George                      | George Pal                          | tt0057812 |
| 1746574749 | 1938 | 1938 | Love Finds Andy Hardy         | Love Finds Andy Hardy         | Seitz, George B.                 | George B. Seitz                     | tt0030386 |
| 1746520735 | 1950 | 1950 | Mr. Music                     | Mr. Music                     | Haydn, Richard                   | Richard Haydn                       | tt0042753 |
| 1746235099 | 1980 | 1980 | Galaxina                      | Galaxina                      | Sachs, William                   | William Sachs                       | tt0080771 |

|                   |             |             |                                               |                                           |                                      |                        |                  |
|-------------------|-------------|-------------|-----------------------------------------------|-------------------------------------------|--------------------------------------|------------------------|------------------|
| 1746569840        | 1958        | 1957        | The Saga of the Viking Women and Their Voyage | The Saga of the Viking Women and Their Vo | Corman, Roger                        | Roger Corman           | tt0052156        |
| 1746581607        | 1930        | 1930        | Swing High                                    | Swing High                                | Santley, Joseph                      | Joseph Santley         | tt0021445        |
| 1746512754        | 1927        | 1927        | Cyclone of the Range                          | Cyclone of the Range                      | De Lacy, Robert                      | Robert De Lacey        | tt0017788        |
| 1746520557        | 1925        | 1925        | Folly of Youth                                | Folly of Youth                            | Hurst, Paul                          |                        | tt0132967        |
| 1746434022        | 1998        | 1998        | I'll Be Home for Christmas                    | I'll Be Home for Christmas                | Sanford, Arlene                      | Arlene Sanford         | tt0155753        |
| 1746198503        | 1969        | 1969        | Salesman                                      | Salesman                                  | Maysles, David; Maysles, Albert; Zwe | Albert Maysles         | tt0064921        |
| 1746423113        | 1940        | 1940        | The Man from Dakota                           | The Man from Dakota                       | Fenton, Leslie                       | Leslie Fenton          | tt0031617        |
| 1745359953        | 2008        | 2008        | Role Models                                   | Role Models                               | Wain, David                          | David Wain             | tt0430922        |
| 1746516561        | 1920        | 1920        | Girl of the Sea                               | Girl of the Sea                           | Kelley, J. Winthrop                  | Winthrop Kelley        | tt0195750        |
| 1746584980        | 1939        | 1939        | Missing Evidence                              | Missing Evidence                          | Rosen, Philip                        | Phil Rosen             | tt0031662        |
| 1746464821        | 1940        | 1940        | Santa Fe Marshal                              | Santa Fe Marshal                          | Selander, Lesley                     | Lesley Selander        | tt0033020        |
| 1769970634        | 1968        | 1968        | Seeds                                         | Seeds                                     | Milligan, Andy                       | Andy Milligan          | tt0235751        |
| 1745340799        | 2002        | 2002        | Sunshine State                                | Sunshine State                            | Sayles, John                         | John Sayles            | tt0286179        |
| 1746495603        | 1919        | 1919        | The Woman Under Oath                          | The Woman Under Oath                      | Stahl, John M.                       | John M. Stahl          | tt0010915        |
| 1746509422        | 1924        | 1924        | Two Shall Be Born                             | Two Shall Be Born                         | Bennett, Whitman                     | Whitman Bennett        | tt0175266        |
| 1746217313        | 1968        | 1968        | The Sweet Ride                                | The Sweet Ride                            | Hart, Harvey                         | Harvey Hart            | tt0063662        |
| 1746408917        | 1986        | 1986        | Recruits                                      | Recruits                                  | Zielinski, Rafal                     | Rafal Zielinski        | tt0091832        |
| 1746500222        | 1926        | 1926        | Shipwrecked                                   | Shipwrecked                               | Henabery, Joseph                     | Joseph Henabery        | tt0017379        |
| 1746474812        | 1946        | 1946        | Deadline at Dawn                              | Deadline at Dawn                          | Clurman, Harold                      | Harold Clurman         | tt0038458        |
| 1746515589        | 1919        | 1919        | Mrs. Wiggs of the Cabbage Patch               | Mrs. Wiggs of the Cabbage Patch           | Ford, Hugh                           | Hugh Ford              | tt0010490        |
| 1746577663        | 1936        | 1936        | Feud of the West                              | Feud of the West                          | Fraser, Harry                        | Harry L. Fraser        | tt0027614        |
| 1746507807        | 1926        | 1926        | A Six Shootin' Romance                        | A Six Shootin' Romance                    | Smith, Clifford S.                   | Alan James             | tt0017400        |
| 1746435899        | 1997        | 1997        | Kicked in the Head                            | Kicked in the Head                        | Harrison, Matthew                    | Matthew Harrison       | tt0119457        |
| 1746580403        | 1935        | 1935        | If You Could Only Cook                        | If You Could Only Cook                    | Seiter, William A.                   | William A. Seiter      | tt0026519        |
| 1746571319        | 1934        | 1934        | Take the Stand                                | Take the Stand                            | Rosen, Phil                          | Phil Rosen             | tt0025857        |
| 1746577996        | 1938        | 1938        | Road Demon                                    | Road Demon                                | Brower, Otto                         | Otto Brower            | tt0030684        |
| 1745359695        | 2002        | 2002        | The Singles Ward                              | The Singles Ward                          | Hale, Kurt                           | Kurt Hale              | tt0306069        |
| 1746500957        | 1910        | 1910        | When the World Sleeps                         | When the World Sleeps                     |                                      | Joseph A. Golden       | tt0001455        |
| 1746271943        | 1968        | 1968        | The Party                                     | The Party                                 | Edwards, Blake                       | Blake Edwards          | tt0063415        |
| 1746560514        | 1932        | 1932        | Lucky Larrigan                                | Lucky Larrigan                            | McCarthy, John P.                    | John P. McCarthy       | tt0023164        |
| 1746185596        | 1965        | 1965        | Murder in Mississippi                         | Murder in Mississippi                     | Mawra, J. P.                         | Joseph P. Mawra        | tt0059485        |
| 1746496131        | 1919        | 1919        | Sahara                                        | Sahara                                    | Rosson, Arthur                       | Arthur Rosson          | tt0010654        |
| 1746486455        | 1920        | 1920        | Rogues and Romance                            | Rogues and Romance                        | Seitz, George B.                     | George B. Seitz        | tt0011637        |
| 1746219544        | 1977        | 1977        | Day of the Animals                            | Day of the Animals                        | Girdler, William                     | William Girdler        | tt0075913        |
| 1746584212        | 1938        | 1938        | Wide Open Faces                               | Wide Open Faces                           | Neumann, Kurt                        | Kurt Neumann           | tt0030977        |
| 1746583446        | 1929        | 1929        | Silks and Saddles                             | Silks and Saddles                         | Hill, Robert F.                      | Robert F. Hill         | tt0020406        |
| 1746566149        | 1957        | 1957        | Legend of the Lost                            | Legend of the Lost                        | Hathaway, Henry                      | Henry Hathaway         | tt0050629        |
| 1746473885        | 1945        | 1945        | Docks of New York                             | Docks of New York                         | Fox, Wallace                         | Wallace Fox            | tt0037648        |
| 1746530729        | 1948        | 1948        | You Were Meant for Me                         | You Were Meant for Me                     | Bacon, Lloyd                         | Lloyd Bacon            | tt0040983        |
| 1746580871        | 1938        | 1938        | Tip-Off Girls                                 | Tip Off Girls                             | King, Louis                          | Louis King             | tt0030875        |
| 1746208160        | 1968        | 1968        | Project X                                     | Project X                                 |                                      | William Castle         | tt0063465        |
| 1746491723        | 1947        | 1947        | Easy Come, Easy Go                            | Easy Come, Easy Go                        | Farrow, John                         | John Farrow            | tt0039346        |
| 1746514052        | 1922        | 1922        | Free Air                                      | Free Air                                  | Griffith, E. H.                      | Edward H. Griffith     | tt0013153        |
| 1746524274        | 1916        | 1916        | The Dawn of Freedom                           | The Dawn of Freedom                       | Scardon, Paul; Marston, Theodore     | Theodore Marston       | tt0157512        |
| 1746502071        | 1915        | 1915        | Old Dutch                                     | Old Dutch                                 | Crane, Frank                         | Frank Hall Crane       | tt0005821        |
| 1746500326        | 1926        | 1926        | West of Broadway                              | West of Broadway                          | Thornby, Robert                      | Robert Thornby         | tt0177372        |
| 1746574792        | 1935        | 1935        | Pursuit                                       | Pursuit                                   | Marin, Edwin L.                      | Edwin L. Marin         | tt0026901        |
| 1746574793        | 1937        | 1937        | The Footloose Heiress                         | The Footloose Heiress                     | Clemens, William                     | William Clemens        | tt0028887        |
| 1746422104        | 1994        | 1994        | Speed                                         | Speed                                     | de Bont, Jan                         | Jan de Bont            | tt0111257        |
| 1746500263        | 1949        | 1949        | Port of New York                              | Port of New York                          | Benedek, Laslo                       | Laslo Benedek          | tt0041761        |
| 1746575805        | 1931        | 1931        | The Big Shot                                  | The Big Shot                              | Murphy, Ralph F.                     | Ralph Murphy           | tt0021661        |
| 1745375161        | 2009        | 2009        | A Single Man                                  | A Single Man                              | Ford, Tom                            | Tom Ford               | tt1315981        |
| <b>1746465003</b> | <b>1942</b> | <b>1942</b> | <b>My Gal Sal</b>                             | <b>My Gal Sal</b>                         | <b>Cummings, Irving</b>              | <b>Irving Cummings</b> | <b>tt0035103</b> |
| 1746582813        | 1938        | 1938        | Juvenile Court                                | Juvenile Court                            | Lederman, D. Ross                    | D. Ross Lederman       | tt0030303        |
| 1746574579        | 1935        | 1935        | The Desert Trail                              | The Desert Trail                          | Lewis, Cullin                        | Lewis D. Collins       | tt0026273        |
| 1746570003        | 1957        | 1957        | House of Numbers                              | House of Numbers                          | Rouse, Russell                       | Russell Rouse          | tt0050526        |
| 1746474819        | 1947        | 1947        | Desperate                                     | Desperate                                 | Mann, Anthony                        | Anthony Mann           | tt0039313        |

|            |      |      |                                      |                                      |                                    |                      |           |
|------------|------|------|--------------------------------------|--------------------------------------|------------------------------------|----------------------|-----------|
| 1746562454 | 1957 | 1957 | Pickup Alley                         | Pickup Alley                         | Gilling, John                      | John Gilling         | tt0050841 |
| 1746496304 | 1917 | 1917 | The Inner Shrine                     | The Inner Shrine                     | Reicher, Frank                     | Frank Reicher        | tt0008137 |
| 1746198072 | 1968 | 1968 | Daring Game                          | Daring Game                          | Benedek, Laslo                     | Laslo Benedek        | tt0062862 |
| 1746504622 | 1921 | 1921 | Such a Little Queen                  | Such a Little Queen                  | Fawcett, George                    | George Fawcett       | tt0012733 |
| 1746502561 | 1916 | 1916 | The Hand of Peril                    | The Hand of Peril                    | Tourneur, Maurice                  | Maurice Tourneur     | tt0006755 |
| 1746219182 | 1978 | 1978 | Martin                               | Martin                               | Romero, George A.                  | George A. Romero     | tt0077914 |
| 1746256810 | 1975 | 1975 | The Devil's Rain                     | The Devil's Rain                     | Fuest, Robert                      | Robert Fuest         | tt0072869 |
| 1746583137 | 1939 | 1939 | The Honeymoon's Over                 | The Honeymoon's Over                 | Forde, Eugene; Beaudine, William   | Eugene Forde         | tt0031441 |
| 1746555078 | 1957 | 1957 | The Quiet Gun                        | The Quiet Gun                        | Claxton, William F.                | William F. Claxton   | tt0050874 |
| 1746570057 | 1934 | 1935 | One in a Million                     | One in a Million                     | Strayer, Frank R.                  | Frank R. Strayer     | tt0025594 |
| 1745293630 | 2007 | 2007 | Breach                               | Breach                               | Ray, Billy                         | Billy Ray            | tt0401997 |
| 1746516039 | 1921 | 1921 | Is Life Worth Living?                | Is Life Worth Living?                | Crosland, Alan                     | Alan Crosland        | tt0012324 |
| 1746584564 | 1931 | 1931 | Devotion                             | Devotion                             | Milton, Robert                     | Robert Milton        | tt0021798 |
| 1746421355 | 1994 | 1994 | I'll Do Anything                     | I'll Do Anything                     | Brooks, James L.                   | James L. Brooks      | tt0110097 |
| 1746493776 | 1914 | 1914 | The Next in Command                  | The Next in Command                  | Dawley, J. Searle                  | J. Searle Dawley     | tt0004398 |
| 1746409520 | 1984 | 1984 | Alley Cat                            | Alley Cat                            | Victor, Edward; Pamos, Eduardo; Or | Victor M. Ordenez    | tt0083541 |
| 1769970832 | 1915 | 1915 | Blade O' Grass                       | Blade o' Grass                       | George, Burton                     | Burton George        | tt0317168 |
| 1746465374 | 1947 | 1947 | Saddle Pals                          | Saddle Pals                          | Selander, Lesley                   | Lesley Selander      | tt0039795 |
| 1746564509 | 1952 | 1952 | Desert Passage                       | Desert Passage                       | Selander, Lesley                   | Lesley Selander      | tt0044540 |
| 1746570297 | 1934 | 1934 | Happy Landing                        | Happy Landing                        | Bradbury, R. N.                    | Robert N. Bradbury   | tt0025220 |
| 1745359155 | 2007 | 2007 | 3:10 to Yuma                         | 3:10 to Yuma                         | Mangold, James                     | James Mangold        | tt0381849 |
| 1746553962 | 1964 | 1964 | Shell Shock                          | Shell Shock                          | Hayes, John                        | John Hayes           | tt0155166 |
| 1746504134 | 1922 | 1922 | The Primitive Lover                  | The Primitive Lover                  | Franklin, Sidney                   | Sidney Franklin      | tt0013512 |
| 1746217417 | 1966 | 1966 | Kid Rodelo                           | Kid Rodelo                           | Carlson, Richard                   | Richard Carlson      | tt0059356 |
| 1746583611 | 1930 | 1930 | A Royal Romance                      | A Royal Romance                      | Kenton, Erle C.                    | Erle C. Kenton       | tt0021323 |
| 1746454012 | 1940 | 1940 | Ragtime Cowboy Joe                   | Ragtime Cowboy Joe                   | Taylor, Ray                        | Ray Taylor           | tt0032965 |
| 1746580910 | 1937 | 1937 | The Outer Gate                       | The Outer Gate                       | Cannon, Ray                        | Raymond Cannon       | tt0029362 |
| 1746578000 | 1937 | 1937 | She Married an Artist                | She Married an Artist                | Gering, Marion                     | Marion Gering        | tt0030740 |
| 1746438474 | 1941 | 1941 | Six Lessons from Madame La Zonga     | Six Lessons from Madame La Zonga     | Rawlins, John                      | John Rawlins         | tt0034196 |
| 1746393703 | 1985 | 1985 | Fandango                             | Fandango                             | Reynolds, Kevin                    | Kevin Reynolds       | tt0089126 |
| 1746503246 | 1917 | 1917 | The Alien Blood                      | The Alien Blood                      | George, Burton                     | Burton George        | tt0007622 |
| 1746486829 | 1917 | 1917 | The Eternal Sin                      | The Eternal Sin                      | Brenon, Herbert                    | Herbert Brenon       | tt0007900 |
| 1746496575 | 1920 | 1920 | A Woman's Business                   | A Woman's Business                   | Rolfe, B. A.                       | B.A. Rolfe           | tt0011878 |
| 1746569667 | 1956 | 1956 | Inside Detroit                       | Inside Detroit                       | Sears, Fred F.                     | Fred F. Sears        | tt0048209 |
| 1746453657 | 1998 | 1998 | The Avengers                         | The Avengers                         | Chechik, Jeremiah                  | Jeremiah S. Chechik  | tt0118661 |
| 1746420991 | 1992 | 1991 | The Runestone                        | The Runestone                        | Carroll, Willard                   | Willard Carroll      | tt0100528 |
| 1746234774 | 1968 | 1967 | Funnyman                             | Funnyman                             | Korty, John                        | John Korty           | tt0179189 |
| 1745373973 | 2008 | 2008 | The Longshots                        | The Longshots                        | Durst, Fred                        | Fred Durst           | tt1091751 |
| 1746492070 | 1948 | 1948 | Green Grass of Wyoming               | Green Grass of Wyoming               | King, Louis                        | Louis King           | tt0040402 |
| 1746565942 | 1953 | 1953 | Let's Do It Again                    | Let's Do It Again                    | Hall, Alexander                    | Alexander Hall       | tt0045995 |
| 1746583671 | 1929 | 1929 | The Valiant                          | The Valiant                          | Howard, William K.                 | William K. Howard    | tt0020543 |
| 1746492241 | 1944 | 1944 | The Adventures of Mark Twain         | The Adventures of Mark Twain         | Rapper, Irving                     | Irving Rapper        | tt0036582 |
| 1745342750 | 2010 | 2010 | Love & Other Drugs                   | Love & Other Drugs                   | Zwick, Edward                      | Edward Zwick         | tt0758752 |
| 1746581665 | 1929 | 1929 | Broadway Fever                       | Broadway Fever                       | Cline, Edward                      | Edward F. Cline      | tt0019727 |
| 1746542750 | 1926 | 1926 | The Danger Girl                      | The Danger Girl                      | Dillon, Edward                     | Edward Dillon        | tt0016763 |
| 1746583917 | 1930 | 1930 | In Gay Madrid                        | In Gay Madrid                        | Leonard, Robert Z.                 | Robert Z. Leonard    | tt0020997 |
| 1746520604 | 1925 | 1925 | Tumbleweeds                          | Tumbleweeds                          | Baggot, King                       | King Baggot          | tt0016461 |
| 1746501455 | 1915 | 1915 | The Danger Signal                    | The Danger Signal                    | Edwin, Walter                      | Walter Edwin         | tt0005171 |
| 1746485330 | 1917 | 1917 | The Girl by the Roadside             | The Girl by the Roadside             | Marston, Theodore                  | Theodore Marston     | tt0008008 |
| 1746515046 | 1916 | 1916 | A Son of Erin                        | A Son of Erin                        | Ivers, Julia Crawford              | Julia Crawford Ivers | tt0158973 |
| 1746392949 | 1982 | 1982 | Trail of the Pink Panther            | Trail of the Pink Panther            | Edwards, Blake                     | Blake Edwards        | tt0084814 |
| 1746409519 | 1985 | 1985 | National Lampoon's European Vacation | National Lampoon's European Vacation | Heckerling, Amy                    | Amy Heckerling       | tt0089670 |
| 1746578564 | 1951 | 1951 | Fort Worth                           | Fort Worth                           | Marin, Edwin L.; McGann, William   | Edwin L. Marin       | tt0043557 |
| 1746422304 | 1993 | 1993 | Jason Goes to Hell: The Final Friday | Jason Goes to Hell: The Final Friday | Marcus, Adam                       | Adam Marcus          | tt0107254 |
| 1746475933 | 1946 | 1946 | The Wife of Monte Cristo             | The Wife of Monte Cristo             | Ulmer, Edgar G.                    | Edgar G. Ulmer       | tt0039106 |
| 1745272214 | 2001 | 2001 | Bubble Boy                           | Bubble Boy                           | Hayes, Blair                       | Blair Hayes          | tt0258470 |
| 1746577221 | 1950 | 1950 | Silver Raiders                       | Silver Raiders                       | Fox, Wallace W.                    | Wallace Fox          | tt0042967 |

|                   |             |             |                                            |                                            |                                    |                        |                  |
|-------------------|-------------|-------------|--------------------------------------------|--------------------------------------------|------------------------------------|------------------------|------------------|
| 1746584441        | 1931        | 1931        | Alexander Hamilton                         | Alexander Hamilton                         | Adolfi, John G.                    | John G. Adolfi         | tt0021595        |
| 1746424408        | 1941        | 1941        | The Maltese Falcon                         | The Maltese Falcon                         | Huston, John                       | John Huston            | tt0033870        |
| 1746516142        | 1919        | 1919        | Fighting for Gold                          | Fighting for Gold                          | LeSaint, Edward J.                 | Edward LeSaint         | tt0010123        |
| 1746570175        | 1933        | 1933        | The White Sister                           | The White Sister                           | Fleming, Victor                    | Victor Fleming         | tt0024770        |
| 1746394166        | 1981        | 1981        | Lunch Wagon                                | Lunch Wagon                                | Pintoff, Ernest                    | Ernest Pintoff         | tt0081088        |
| 1746515799        | 1922        | 1922        | The Ruling Passion                         | The Ruling Passion                         | Weight, Harmon                     | F. Harmon Weight       | tt0013567        |
| 1746570042        | 1934        | 1934        | Beast of Borneo                            | The Beast of Borneo                        | Gordon, Harry                      | Harry Garson           | tt0025075        |
| 1746501765        | 1915        | 1915        | The Morals of Marcus                       | The Morals of Marcus                       | Porter, Edwin S.; Ford, Hugh       | Hugh Ford              | tt0005770        |
| 1745342693        | 2001        | 2001        | The Glass House                            | The Glass House                            | Sackheim, Daniel                   | Daniel Sackheim        | tt0221218        |
| 1746584211        | 1936        | 1936        | Killer at Large                            | Killer at Large                            | Selman, David                      | David Selman           | tt0027843        |
| 1746578824        | 1961        | 1961        | Dark Odyssey                               | Dark Odyssey                               | Kyriakys, William; Metzger, Radley | William Kyriakis       | tt0054787        |
| 1746577668        | 1933        | 1933        | Jennie Gerhardt                            | Jennie Gerhardt                            | Gering, Marion                     | Marion Gering          | tt0024193        |
| 1746492225        | 1944        | 1944        | Gildersleeve's Ghost                       | Gildersleeve's Ghost                       | Douglas, Gordon                    | Gordon Douglas         | tt0036864        |
| 1746585412        | 1940        | 1940        | The Invisible Man Returns                  | The Invisible Man Returns                  | May, Joe                           | Joe May                | tt0032635        |
| 1746567449        | 1932        | 1932        | Heritage of the Desert                     | Heritage of the Desert                     | Hathaway, Henry                    | Henry Hathaway         | tt0022999        |
| 1746500168        | 1925        | 1925        | Seven Chances                              | Seven Chances                              | Keaton, Buster                     | Buster Keaton          | tt0016332        |
| 1746436822        | 1991        | 1991        | My Girl                                    | My Girl                                    | Zieff, Howard                      | Howard Zieff           | tt0102492        |
| 1746437151        | 2000        | 1999        | Just Looking                               | Just Looking                               | Alexander, Jason                   | Jason Alexander        | tt0162236        |
| 1746235802        | 1974        | 1974        | The Black Godfather                        | The Black Godfather                        | Evans, John                        | John Evans             | tt0071225        |
| 1746577821        | 1939        | 1939        | The Thundering West                        | The Thundering West                        | Nelson, Sam                        | Sam Nelson             | tt0032035        |
| 1746438587        | 2000        | 2000        | Best in Show                               | Best in Show                               | Guest, Christopher                 | Christopher Guest      | tt0218839        |
| 1746584409        | 1939        | 1939        | Outside These Walls                        | Outside These Walls                        | McCarey, Raymond B.                | Ray McCarey            | tt0031771        |
| 1746439480        | 1940        | 1940        | Law and Order                              | Law and Order                              | Taylor, Ray                        | Ray Taylor             | tt0032694        |
| 1746542667        | 1924        | 1924        | Bringin' Home the Bacon                    | Bringin' Home the Bacon                    | Thorpe, Richard                    | Richard Thorpe         | tt0014742        |
| 1746582459        | 1939        | 1939        | Saga of Death Valley                       | Saga of Death Valley                       | Kane, Joseph                       | Joseph Kane            | tt0031889        |
| 1746567346        | 1953        | 1953        | The Redhead from Wyoming                   | The Redhead from Wyoming                   | Sholem, Lee                        | Lee Sholem             | tt0045077        |
| 1746583497        | 1930        | 1930        | The Lonesome Trail                         | The Lonesome Trail                         | Mitchell, Bruce                    | Bruce Mitchell         | tt0021086        |
| 1745341624        | 2003        | 2003        | Freddy vs. Jason                           | Freddy vs. Jason                           | Yu, Ronny                          | Ronny Yu               | tt0329101        |
| <b>1746422299</b> | <b>1995</b> | <b>1995</b> | <b>Kicking and Screaming</b>               | <b>Kicking and Screaming</b>               | <b>Baumbach, Noah</b>              | <b>Noah Baumbach</b>   | <b>tt0113537</b> |
| 1746218909        | 1978        | 1978        | Damien--Omen II                            | Damien: Omen II                            | Taylor, Don                        | Don Taylor             | tt0077394        |
| 1746435316        | 1998        | 1998        | American History X                         | American History X                         | Kaye, Tony                         | Tony Kaye              | tt0120586        |
| 1746235481        | 1975        | 1975        | Hustle                                     | Hustle                                     | Aldrich, Robert                    | Robert Aldrich         | tt0073133        |
| 1746516467        | 1921        | 1921        | One Wild Week                              | One Wild Week                              | Campbell, Maurice                  | Maurice Campbell       | tt0012528        |
| 1746465058        | 1942        | 1942        | Remember Pearl Harbor                      | Remember Pearl Harbor                      | Santley, Joseph                    | Joseph Santley         | tt0035249        |
| 1746208945        | 1966        | 1966        | To the Shores of Hell                      | To the Shores of Hell                      | Zens, Will                         | Will Zens              | tt0061099        |
| 1746571918        | 1931        | 1931        | Meet the Wife                              | Meet the Wife                              | Pearce, A. Leslie                  | Leslie Pearce          | tt0022130        |
| 1745342246        | 2004        | 2004        | Raising Helen                              | Raising Helen                              | Marshall, Garry                    | Garry Marshall         | tt0350028        |
| 1746453587        | 1940        | 1939        | Death Rides the Range                      | Death Rides the Range                      | Newfield, Sam                      | Sam Newfield           | tt0032387        |
| 1746582287        | 1930        | 1930        | On the Border                              | On the Border                              | McGann, William                    | William C. McGann      | tt0021208        |
| 1746465142        | 1945        | 1945        | Sensation Hunters                          | Sensation Hunters                          | Cabanne, Christy                   | Christy Cabanne        | tt0038071        |
| 1746433750        | 2000        | 2000        | Book of Shadows: Blair Witch 2             | Book of Shadows: Blair Witch 2             | Berlinger, Joe                     | Joe Berlinger          | tt0229260        |
| 1746515606        | 1917        | 1917        | The Skylight Room                          | The Skylight Room                          | Justice, Martin                    | Martin Justice         | tt0182426        |
| 1746410746        | 1988        | 1988        | Rocket Gibraltar                           | Rocket Gibraltar                           | Petrie, Daniel                     | Daniel Petrie          | tt0096003        |
| 1746575389        | 1931        | 1931        | The Girl Habit                             | The Girl Habit                             | Cline, Edward                      | Edward F. Cline        | tt0021908        |
| 1746564750        | 1952        | 1952        | The Treasure of Lost Canyon                | The Treasure of Lost Canyon                | Tetzlaff, Ted                      | Ted Tetzlaff           | tt0044144        |
| 1746574892        | 1935        | 1935        | Rustler's Paradise                         | Rustler's Paradise                         | Fraser, Harry                      | Harry L. Fraser        | tt0026959        |
| 1746580876        | 1936        | 1936        | Racing Blood                               | Racing Blood                               | Hale, Rex                          | Victor Halperin        | tt0030648        |
| 1745341451        | 2002        | 2002        | The Bourne Identity                        | The Bourne Identity                        | Liman, Doug                        | Doug Liman             | tt0258463        |
| 1745341565        | 2002        | 2002        | Antwone Fisher                             | Antwone Fisher                             | Washington, Denzel                 | Denzel Washington      | tt0168786        |
| 1746582779        | 1939        | 1939        | Pacific Liner                              | Pacific Liner                              | Landers, Lew                       | Lew Landers            | tt0031774        |
| 1746507605        | 1926        | 1925        | Riding Romance                             | Riding Romance                             | McGowan, J. P.                     | J.P. McGowan           | tt0017325        |
| <b>1746555503</b> | <b>1955</b> | <b>1955</b> | <b>The Night Holds Terror</b>              | <b>The Night Holds Terror</b>              | <b>Stone, Andrew</b>               | <b>Andrew L. Stone</b> | <b>tt0048423</b> |
| 1746532458        | 1928        | 1928        | The Little Wildcat                         | The Little Wildcat                         | Enright, Ray                       | Ray Enright            | tt0020102        |
| 1746564327        | 1953        | 1953        | China Venture                              | China Venture                              | Siegel, Don                        | Don Siegel             | tt0045624        |
| 1746569616        | 1955        | 1955        | Abbott and Costello Meet the Keystone Kops | Abbott and Costello Meet the Keystone Kops | Lamont, Charles                    | Charles Lamont         | tt0047794        |
| 1746533208        | 1923        | 1923        | The Untameable                             | The Untameable                             | Blaché, Herbert                    | Herbert Blaché         | tt0014570        |
| 1746564752        | 1953        | 1953        | The Caddy                                  | The Caddy                                  | Taugog, Norman                     | Norman Taugog          | tt0045589        |

1

1



|            |      |      |                                    |                                    |                                            |                    |           |
|------------|------|------|------------------------------------|------------------------------------|--------------------------------------------|--------------------|-----------|
| 1746509174 | 1924 | 1924 | The Dawn of a Tomorrow             | The Dawn of a Tomorrow             | Melford, George                            | George Melford     | tt0014836 |
| 1746562382 | 1956 | 1956 | Accused of Murder                  | Accused of Murder                  | Kane, Joe                                  | Joseph Kane        | tt0048924 |
| 1746198089 | 1968 | 1967 | The Money Jungle                   | The Money Jungle                   | Lyon, Francis D.                           | Francis D. Lyon    | tt0063322 |
| 1746421666 | 1994 | 1994 | Federal Hill                       | Federal Hill                       | Corrente, Michael                          | Michael Corrente   | tt0109785 |
| 1746491742 | 1946 | 1946 | The Spiral Staircase               | The Spiral Staircase               | Siodmak, Robert                            | Robert Siodmak     | tt0038975 |
| 1746524822 | 1916 | 1916 | The Flirt                          | The Flirt                          | Weber, Lois; Smalley, Phillips             | Phillips Smalley   | tt0006687 |
| 1769970434 | 1967 | 1967 | Fanny Hill Meets Lady Chatterly    | Fanny Hill Meets Lady Chatterly    | Mahon, Barry; Matsui, George               | Barry Mahon        | tt0218203 |
| 1746235398 | 1975 | 1975 | The Great Waldo Pepper             | The Great Waldo Pepper             | Hill, George Roy                           | George Roy Hill    | tt0073075 |
| 1746584439 | 1931 | 1931 | Pleasure                           | Pleasure                           | Brower, Otto                               | Otto Brower        | tt0023343 |
| 1746581270 | 1959 | 1959 | The Best of Everything             | The Best of Everything             | Negulesco, Jean                            | Jean Negulesco     | tt0052619 |
| 1746410721 | 1993 | 1992 | Guncrazy                           | Guncrazy                           | Davis, Tamra                               | Tamra Davis        | tt0104377 |
| 1746465015 | 1942 | 1942 | Devil's Harvest                    | Devil's Harvest                    | Test, Ray                                  | Ray Test           | tt0157533 |
| 1746503369 | 1918 | 1918 | Convict 993                        | Convict 993                        | Parke, William                             | William Parke      | tt0184356 |
| 1746508952 | 1926 | 1925 | Fighting Luck                      | Fighting Luck                      | McGowan, J. P.                             | J.P. McGowan       | tt0016863 |
| 1745359738 | 2002 | 2002 | Hollywood Ending                   | Hollywood Ending                   | Allen, Woody                               | Woody Allen        | tt0278823 |
| 1746565979 | 1957 | 1957 | Street of Sinners                  | Street of Sinners                  | Berke, William                             | William Berke      | tt0051022 |
| 1746184193 | 1910 | 1910 | The Blazed Trail                   | The Blazed Trail                   |                                            |                    | tt0359014 |
| 1746571489 | 1931 | 1931 | Neck and Neck                      | Neck and Neck                      | Thorpe, Richard                            | Richard Thorpe     | tt0022193 |
| 1745359347 | 2001 | 2001 | Ghost World                        | Ghost World                        | Zwigoff, Terry                             | Terry Zwigoff      | tt0162346 |
| 1746582526 | 1938 | 1938 | Mr. Wong, Detective                | Mr. Wong, Detective                | Nigh, William                              | William Nigh       | tt0030473 |
| 1746542672 | 1926 | 1926 | Stop, Look, and Listen             | Stop, Look and Listen              | Semon, Larry                               | Larry Semon        | tt0017433 |
| 1746524072 | 1915 | 1915 | Gretna Green                       | Gretna Green                       | Heffron, Thomas                            | Thomas N. Heffron  | tt0005427 |
| 1746542716 | 1924 | 1924 | The Man From Wyoming               | The Man from Wyoming               | Bradbury, Robert North                     | Robert N. Bradbury | tt0015109 |
| 1746574416 | 1961 | 1961 | The 7th Commandment                | The 7th Commandment                | Berwick, Irvin                             | Irvin Berwick      | tt0054297 |
| 1746559831 | 1965 | 1965 | Beauty #2                          | Beauty #2                          | Warhol, Andy                               | Andy Warhol        | tt0208725 |
| 1746584728 | 1929 | 1929 | Tanned Legs                        | Tanned Legs                        | Neilan, Marshall                           | Marshall Neilan    | tt0020480 |
| 1746573948 | 1957 | 1957 | Gunsight Ridge                     | Gunsight Ridge                     | Lyon, Francis D.                           | Francis D. Lyon    | tt0050471 |
| 1746198066 | 1969 | 1969 | True Grit                          | True Grit                          | Hathaway, Henry                            | Henry Hathaway     | tt0065126 |
| 1746523956 | 1911 | 1911 | As a Boy Dreams                    | As a Boy Dreams                    |                                            | Thomas H. Ince     | tt1174943 |
| 1746574300 | 1961 | 1961 | Fear No More                       | Fear No More                       | Wiesen, Bernard                            | Bernard Wiesen     | tt0150524 |
| 1746500916 | 1916 | 1916 | The Power of Evil                  | The Power of Evil                  | Horkheimer, H. M.; Horkheimer, E. D. E. D. | Horkheimer         | tt0007206 |
| 1746421586 | 1995 | 1995 | Two Bits                           | Two Bits                           | Foley, James                               | James Foley        | tt0114753 |
| 1746465044 | 1942 | 1942 | Tramp, Tramp, Tramp                | Tramp, Tramp, Tramp!               | Barton, Charles                            | Charles Barton     | tt0035467 |
| 1746500309 | 1926 | 1926 | Ranson's Folly                     | Ranson's Folly                     | Olcott, Sidney                             | Sidney Olcott      | tt0017309 |
| 1745293328 | 2005 | 2006 | Who Gets to Call It Art?           | Who Gets to Call It Art?           | Rosen, Peter                               | Peter Rosen        | tt0472210 |
| 1746436091 | 1943 | 1943 | Margin for Error                   | Margin for Error                   | Preminger, Otto                            | Otto Preminger     | tt0036142 |
| 1746566128 | 1954 | 1954 | The Black Knight                   | The Black Knight                   | Garnett, Tay                               | Tay Garnett        | tt0046786 |
| 1746424554 | 1943 | 1943 | You Can't Beat the Law             | You Can't Beat the Law             | Rosen, Phil                                | Phil Rosen         | tt0036550 |
| 1746508766 | 1925 | 1925 | Webs of Steel                      | Webs of Steel                      | McGowan, J. P.                             | J.P. McGowan       | tt0016508 |
| 1746202400 | 1970 | 1970 | Chisum                             | Chisum                             | McLaglen, Andrew V.                        | Andrew V. McLaglen | tt0065547 |
| 1746500488 | 1926 | 1926 | Dangerous Traffic                  | Dangerous Traffic                  | Cohn, Bennett                              | Bennett Cohn       | tt0016768 |
| 1746502460 | 1914 | 1914 | In the Name of the Prince of Peace | In the Name of the Prince of Peace | Dawley, J. Searle                          | J. Searle Dawley   | tt0004152 |
| 1746465367 | 1945 | 1945 | Guest Wife                         | Guest Wife                         | Wood, Sam                                  | Sam Wood           | tt0037756 |
| 1746584580 | 1928 | 1928 | Smith's Holiday                    | Smith's Holiday                    | Goulding, Alf                              | Alfred J. Goulding | tt0783827 |
| 1745340248 | 2003 | 2003 | Cradle 2 the Grave                 | Cradle 2 the Grave                 | Bartkowiak, Andrzej                        | Andrzej Bartkowiak | tt0306685 |
| 1746219540 | 1976 | 1976 | A Star Is Born                     | A Star Is Born                     | Pierson, Frank                             | Frank Pierson      | tt0075265 |
| 1746509324 | 1925 | 1925 | Lover's Island                     | Lover's Island                     | Diamant-Berger, Henri                      | Henri Diamant      | tt0016047 |
| 1746584213 | 1936 | 1936 | Palm Springs                       | Palm Springs                       | Scotto, Aubrey                             | Aubrey Scotto      | tt0028079 |
| 1746524935 | 1914 | 1914 | A Celebrated Case                  | A Celebrated Case                  |                                            | George Melford     | tt0003761 |
| 1746208777 | 1966 | 1966 | Judith                             | Judith                             | Mann, Daniel                               | Daniel Mann        | tt0060568 |
| 1746567762 | 1933 | 1933 | The Little Giant                   | The Little Giant                   | Del Ruth, Roy                              | Roy Del Ruth       | tt0024262 |
| 1746491831 | 1948 | 1948 | The Counterfeiters                 | The Counterfeiters                 | Stewart, Peter                             | Sam Newfield       | tt0040250 |
| 1746454483 | 1940 | 1940 | The House Across the Bay           | The House Across the Bay           | Mayo, Archie                               | Archie Mayo        | tt0032609 |
| 1746585148 | 1929 | 1929 | Glorifying the American Girl       | Glorifying the American Girl       | Webb, Millard                              | Millard Webb       | tt0019933 |
| 1746500207 | 1950 | 1950 | Bunco Squad                        | Bunco Squad                        | Leeds, Herbert I.                          | Herbert I. Leeds   | tt0042289 |
| 1746567963 | 1952 | 1952 | Night Without Sleep                | Night Without Sleep                | Baker, Roy                                 | Roy Ward Baker     | tt0044967 |
| 1746585461 | 1939 | 1939 | Maisie                             | Maisie                             | Marin, Edwin L.                            | Edwin L. Marin     | tt0031608 |

|            |      |      |                                           |                                           |                                 |                    |           |
|------------|------|------|-------------------------------------------|-------------------------------------------|---------------------------------|--------------------|-----------|
| 1746248506 | 1968 | 1968 | Unstrap Me                                | Unstrap Me                                | Kuchar, George                  | George Kuchar      | tt0207179 |
| 1746532833 | 1915 | 1915 | The House of the Lost Court               | The House of the Lost Court               | Brabin, Charles J.              | Charles Brabin     | tt0005519 |
| 1746436348 | 1941 | 1941 | Ridin' on a Rainbow                       | Ridin' on a Rainbow                       | Landers, Lew                    | Lew Landers        | tt0034106 |
| 1745293919 | 2005 | 2005 | Herbie: Fully Loaded                      | Herbie Fully Loaded                       | Robinson, Angela                | Angela Robinson    | tt0400497 |
| 1746454019 | 1941 | 1941 | Mr. Celebrity                             | Mr. Celebrity                             | Beaudine, William               | William Beaudine   | tt0035089 |
| 1746503653 | 1921 | 1921 | The Foolish Age                           | The Foolish Age                           | Seiter, William A.              | William A. Seiter  | tt0012182 |
| 1746573777 | 1961 | 1961 | The Last Sunset                           | The Last Sunset                           | Aldrich, Robert                 | Robert Aldrich     | tt0055073 |
| 1746475511 | 1945 | 1945 | It's a Pleasure!                          | It's a Pleasure                           | Seiter, William A.              | William A. Seiter  | tt0037822 |
| 1746497425 | 1917 | 1917 | Polly Redhead                             | Polly Redhead                             | Conway, Jack                    | Jack Conway        | tt0008441 |
| 1746500031 | 1924 | 1924 | The Masked Dancer                         | The Masked Dancer                         | King, Burton                    | Burton L. King     | tt0015124 |
| 1745357635 | 2004 | 2004 | Shall We Dance                            | Shall We Dance                            | Chelsom, Peter                  | Peter Chelsom      | tt0358135 |
| 1746454269 | 1942 | 1942 | They All Kissed the Bride                 | They All Kissed the Bride                 | Hall, Alexander                 | Alexander Hall     | tt0035428 |
| 1746572844 | 1910 | 1910 | The Dead Letter                           | The Dead Letter                           |                                 |                    | tt1080590 |
| 1746474829 | 1945 | 1945 | Riders of the Dawn                        | Riders of the Dawn                        | Drake, Oliver                   | Oliver Drake       | tt0163182 |
| 1746475939 | 1945 | 1945 | Renegades of the Rio Grande               | Renegades of the Rio Grande               | Bretherton, Howard              | Howard Bretherton  | tt0038021 |
| 1746501076 | 1915 | 1915 | The Whirl of Life                         | The Whirl of Life                         | Bailey, Oliver D.               | Oliver D. Bailey   | tt0006276 |
| 1746530753 | 1948 | 1948 | Hidden Danger                             | Hidden Danger                             | Taylor, Ray                     | Ray Taylor         | tt0040436 |
| 1746553577 | 1963 | 1963 | The Yellow Canary                         | The Yellow Canary                         | Kulik, Buzz                     | Buzz Kulik         | tt0057700 |
| 1746496416 | 1917 | 1917 | The Spreading Dawn                        | The Spreading Dawn                        | Trimble, Lawrence               | Laurence Trimble   | tt0008622 |
| 1746516310 | 1922 | 1922 | The Stranger's Banquet                    | The Strangers' Banquet                    | Neilan, Marshall                | Marshall Neilan    | tt0013640 |
| 1746561432 | 1932 | 1932 | Girl Crazy                                | Girl Crazy                                | Seiter, William A.              | William A. Seiter  | tt0022938 |
| 1746410820 | 1990 | 1990 | Men at Work                               | Men at Work                               | Estevez, Emilio                 | Emilio Estevez     | tt0100135 |
| 1746532736 | 1915 | 1915 | Judge Not; or, the Woman of Mona Diggings | Judge Not; or The Woman of Mona Diggings  | Leonard, Robert                 | Robert Z. Leonard  | tt0005575 |
| 1746583298 | 1930 | 1930 | Inside the Lines                          | Inside the Lines                          | Pomeroy, Roy J.                 | Roy Pomeroy        | tt0021001 |
| 1746409958 | 1983 | 1983 | Space Raiders                             | Space Raiders                             | Cohen, Howard R.                | Howard R. Cohen    | tt0086345 |
| 1746564287 | 1952 | 1951 | It's a Big Country: An American Anthology | It's a Big Country: An American Anthology |                                 | Clarence Brown     | tt0043680 |
| 1746562370 | 1957 | 1957 | Teen Age Thunder                          | Teenage Thunder                           | Helmick, Paul                   | Paul Helmick       | tt0048902 |
| 1746532978 | 1923 | 1922 | Robin Hood                                | Robin Hood                                | Dwan, Allan                     | Allan Dwan         | tt0013556 |
| 1746435582 | 1943 | 1943 | Redhead from Manhattan                    | Redhead from Manhattan                    | Landers, Lew                    | Lew Landers        | tt0036297 |
| 1746569669 | 1958 | 1958 | No Place to Land                          | No Place to Land                          | Gannaway, Albert C.             | Albert C. Gannaway | tt0052003 |
| 1746566232 | 1955 | 1955 | What Price Freedom                        | What Price Freedom                        |                                 | Paul F. Heard      | tt7255510 |
| 1745359512 | 2001 | 2000 | Million Dollar Hotel                      | The Million Dollar Hotel                  | Wenders, Wim                    | Wim Wenders        | tt0120753 |
| 1746566022 | 1954 | 1953 | Forever Female                            | Forever Female                            | Rapper, Irving                  | Irving Rapper      | tt0045782 |
| 1746565036 | 1953 | 1953 | The Blue Gardenia                         | The Blue Gardenia                         | Lang, Fritz                     | Fritz Lang         | tt0045564 |
| 1746554843 | 1964 | 1964 | Marnie                                    | Marnie                                    | Hitchcock, Alfred               | Alfred Hitchcock   | tt0058329 |
| 1746570448 | 1934 | 1934 | Of Human Bondage                          | Of Human Bondage                          | Cromwell, John                  | John Cromwell      | tt0025586 |
| 1746577272 | 1958 | 1958 | The Vikings                               | The Vikings                               | Fleischer, Richard              | Richard Fleischer  | tt0052365 |
| 1745340475 | 2001 | 2001 | Double Take                               | Double Take                               | Gallo, George                   | George Gallo       | tt0238948 |
| 1746574827 | 1933 | 1933 | Destination Unknown                       | Destination Unknown                       | Garnett, Tay                    | Tay Garnett        | tt0023941 |
| 1746583547 | 1951 | 1951 | Fort Savage Raiders                       | Fort Savage Raiders                       | Nazarro, Ray                    | Ray Nazarro        | tt0043556 |
| 1746583143 | 1936 | 1936 | His Brother's Wife                        | His Brother's Wife                        | Van Dyke, W. S.                 | W.S. Van Dyke      | tt0027746 |
| 1746464845 | 1941 | 1941 | A Man Betrayed                            | A Man Betrayed                            | Auer, John H.                   | John H. Auer       | tt0033871 |
| 1745372428 | 2001 | 2001 | See Spot Run                              | See Spot Run                              | Whitesell, John                 | John Whitesell     | tt0250720 |
| 1746464857 | 1942 | 1942 | Arizona Terrors                           | Arizona Terrors                           | Sherman, George                 | George Sherman     | tt0034470 |
| 1745359309 | 2002 | 2002 | Orange County                             | Orange County                             | Kasdan, Jake                    | Jake Kasdan        | tt0273923 |
| 1746570363 | 1934 | 1934 | The Westerner                             | The Westerner                             | Selman, David                   | David Selman       | tt0128838 |
| 1746574316 | 1959 | 1959 | The Scavengers                            | The Scavengers                            | Cromwell, John                  | John Cromwell      | tt0057474 |
| 1746584533 | 1931 | 1931 | Dirigible                                 | Dirigible                                 | Capra, Frank R.                 | Frank Capra        | tt0021799 |
| 1746464943 | 1947 | 1947 | Blondie in the Dough                      | Blondie in the Dough                      | Berlin, Abby                    | Abby Berlin        | tt0039200 |
| 1746210585 | 1973 | 1973 | Paper Moon                                | Paper Moon                                | Bogdanovich, Peter              | Peter Bogdanovich  | tt0070510 |
| 1746582221 | 1928 | 1928 | Pay As You Enter                          | Pay as You Enter                          | Bacon, Lloyd                    | Lloyd Bacon        | tt0019259 |
| 1746584778 | 1930 | 1930 | Only Saps Work                            | Only Saps Work                            | Gardner, Cyril; Knopf, Edwin H. | Cyril Gardner      | tt0021218 |
| 1746524540 | 1910 | 1910 | What Great Bear Learned                   | What Great Bear Learned                   |                                 | William F. Haddock | tt1084753 |
| 1746218882 | 1980 | 1980 | Seems Like Old Times                      | Seems Like Old Times                      | Sandrich, Jay                   | Jay Sandrich       | tt0081480 |
| 1746513791 | 1916 | 1916 | The Dumb Girl of Portici                  | The Dumb Girl of Portici                  | Weber, Lois; Smalley, Phillips  | Phillips Smalley   | tt0006614 |
| 1746520106 | 1925 | 1925 | California Straight Ahead                 | California Straight Ahead                 | Pollard, Harry                  | Harry A. Pollard   | tt0015663 |
| 1746202418 | 1970 | 1970 | Little Fauss and Big Halsy                | Little Fauss and Big Halsy                | Furie, Sidney J.                | Sidney J. Furie    | tt0065989 |

|                   |             |             |                                               |                                           |                               |                              |                  |
|-------------------|-------------|-------------|-----------------------------------------------|-------------------------------------------|-------------------------------|------------------------------|------------------|
| 1746410374        | 1988        | 1988        | Die Hard                                      | Die Hard                                  | McTiernan, John               | John McTiernan               | tt0095016        |
| 1746218833        | 1972        | 1972        | The Candidate                                 | The Candidate                             | Ritchie, Michael              | Michael Ritchie              | tt0068334        |
| 1746583504        | 1931        | 1931        | The Maltese Falcon                            | The Maltese Falcon                        | Del Ruth, Roy                 | Roy Del Ruth                 | tt0022111        |
| 1746514938        | 1916        | 1916        | Drugged Waters                                | Drugged Waters                            | Dowlan, William               | William C. Dowlan            | tt0006612        |
| 1746524349        | 1914        | 1914        | When Fate Leads Trump                         | When Fate Leads Trump                     | Handworth, Harry              | Harry Handworth              | tt0004797        |
| 1746437418        | 1940        | 1940        | Black Diamonds                                | Black Diamonds                            | Cabanne, Christy              | Christy Cabanne              | tt0032257        |
| 1746570344        | 1952        | 1952        | The Lusty Men                                 | The Lusty Men                             | Ray, Nicholas                 | Nicholas Ray                 | tt0044860        |
| 1746523272        | 1910        | 1910        | The Schoolmaster of Mariposa                  | The Schoolmaster of Mariposa              |                               | Francis Boggs                | tt0001873        |
| 1746570735        | 1934        | 1934        | Where Sinners Meet                            | Where Sinners Meet                        | Ruben, J. Walter              | J. Walter Ruben              | tt0025982        |
| 1746454866        | 1995        | 1995        | Wild Bill                                     | Wild Bill                                 | Hill, Walter                  | Walter Hill                  | tt0114938        |
| 1746487618        | 1918        | 1918        | Rosemary Climbs the Heights                   | Rosemary Climbs the Heights               | Ingraham, Lloyd               | Lloyd Ingraham               | tt0010643        |
| 1746424008        | 1941        | 1941        | Dude Cowboy                                   | Dude Cowboy                               | Howard, David                 | David Howard                 | tt0033560        |
| 1746582235        | 1929        | 1929        | Cheyenne                                      | Cheyenne                                  | Rogell, Albert                | Albert S. Rogell             | tt0019761        |
| 1746569766        | 1953        | 1953        | The Royal African Rifles                      | The Royal African Rifles                  | Selander, Lesley              | Lesley Selander              | tt0046254        |
| 1746508704        | 1925        | 1925        | Red Hot Tires                                 | Red Hot Tires                             | Kenton, Erle C.               | Erle C. Kenton               | tt0016275        |
| 1746574854        | 1936        | 1936        | Speed                                         | Speed                                     | Marin, Edwin L.               | Edwin L. Marin               | tt0028291        |
| 1746408428        | 1984        | 1984        | The Karate Kid                                | The Karate Kid                            | Avildsen, John G.             | John G. Avildsen             | tt0087538        |
| <b>1746198114</b> | <b>1969</b> | <b>1969</b> | <b>Coming Apart</b>                           | <b>Coming Apart</b>                       | <b>Ginsberg, Milton Moses</b> | <b>Milton Moses Ginsberg</b> | <b>tt0064180</b> |
| 1746578774        | 1961        | 1960        | Not Tonight Henry                             | Not Tonight Henry                         | Connell, W. Merle             | W. Merle Connell             | tt0055239        |
| 1746492727        | 1946        | 1946        | The Missing Lady                              | The Missing Lady                          | Karlson, Phil                 | Phil Karlson                 | tt0038743        |
| 1746566755        | 1933        | 1933        | Jimmy and Sally                               | Jimmy and Sally                           | Tinling, James                | James Tinling                | tt0024195        |
| 1746563994        | 1952        | 1952        | Bend of the River                             | Bend of the River                         | Mann, Anthony                 | Anthony Mann                 | tt0044413        |
| 1769970490        | 1967        | 1967        | Justine                                       | Justine                                   | Johnsen, S. N.                | Sande N. Johnsen             | tt0137859        |
| 1746583903        | 1930        | 1930        | Framed                                        | Framed                                    | Archainbaud, George           | George Archainbaud           | tt0020900        |
| 1746549872        | 1954        | 1954        | Riders to the Stars                           | Riders to the Stars                       | Carlson, Richard              | Richard Carlson              | tt0046240        |
| 1746569705        | 1954        | 1954        | On the Waterfront                             | On the Waterfront                         | Kazan, Elia                   | Elia Kazan                   | tt0047296        |
| 1746409361        | 1986        | 1986        | The Karate Kid Part II                        | The Karate Kid Part II                    | Avildsen, John G.             | John G. Avildsen             | tt0091326        |
| 1746218844        | 1973        | 1973        | Detroit 9000                                  | Detroit 9000                              | Marks, Arthur                 | Arthur Marks                 | tt0069966        |
| 1746578889        | 1951        | 1951        | The Painted Hills                             | The Painted Hills                         | Kress, Harold                 | Harold F. Kress              | tt0043895        |
| 1746524052        | 1917        | 1917        | The Good for Nothing                          | The Good for Nothing                      | Blackwell, Carlyle            | Carlyle Blackwell            | tt0008025        |
| 1746491967        | 1947        | 1947        | Gun Talk                                      | Gun Talk                                  | Hillyer, Lambert              | Lambert Hillyer              | tt0039440        |
| 1745340322        | 2004        | 2004        | The Perfect Score                             | The Perfect Score                         | Robbins, Brian                | Brian Robbins                | tt0314498        |
| 1746508723        | 1949        | 1948        | Trouble Makers                                | Trouble Makers                            | Le Borg, Reginald             | Reginald Le Borg             | tt0040905        |
| 1746583223        | 1930        | 1930        | Charley's Aunt                                | Charley's Aunt                            | Christie, Al                  | Al Christie                  | tt0020754        |
| 1746508428        | 1925        | 1925        | Desperate Odds                                | Desperate Odds                            | Carpenter, Horace B.          | Horace B. Carpenter          | tt0015747        |
| 1746584013        | 1936        | 1936        | The Big Game                                  | The Big Game                              | Nicholls, George              | George Nichols Jr.           | tt0027358        |
| 1769970824        | 1915        | 1915        | Otto's Cabaret                                | Otto's Cabaret                            | McKim, Edward                 | Edwin McKim                  | tt0204536        |
| 1746424242        | 1941        | 1941        | Rags to Riches                                | Rags to Riches                            | Kane, Joseph                  | Joseph Kane                  | tt0034080        |
| 1745272091        | 2001        | 2001        | America's Sweethearts                         | America's Sweethearts                     | Roth, Joe                     | Joe Roth                     | tt0265029        |
| 1746565303        | 1932        | 1932        | Emma                                          | Emma                                      | Brown, Clarence               | Clarence Brown               | tt0022854        |
| 1746508883        | 1925        | 1925        | Heartbound                                    | Heartbound                                | Lambert, Glen                 | Glen Lambert                 | tt0219755        |
| 1746475951        | 1947        | 1948        | Slippy McGee                                  | Slippy McGee                              | Kelley, Albert                | Albert H. Kelley             | tt0040800        |
| 1746467352        | 1917        | 1917        | The Girl Who Couldn't Grow Up                 | The Girl Who Couldn't Grow Up             | Pollard, Harry                | Harry A. Pollard             | tt0175667        |
| 1746497245        | 1918        | 1918        | Humility                                      | Humility                                  | Pratt, Jack                   | Jack Pratt                   | tt0184595        |
| 1746543076        | 1915        | 1915        | Jack Chanty                                   | Jack Chanty                               | Figman, Max                   | Max Figman                   | tt0005559        |
| 1746421653        | 1940        | 1940        | The Biscuit Eater                             | The Biscuit Eater                         | Heisler, Stuart               | Stuart Heisler               | tt0032254        |
| 1746218899        | 1972        | 1972        | The Rats Are Coming! The Werewolves Are Here! | The Rats Are Coming! The Werewolves Are H | Milligan, Andy                | Andy Milligan                | tt0069162        |
| 1746520355        | 1926        | 1926        | For Wives Only                                | For Wives Only                            | Heerman, Victor               | Victor Heerman               | tt0016898        |
| 1745340018        | 2004        | 2004        | Without a Paddle                              | Without a Paddle                          | Brill, Steven                 | Steven Brill                 | tt0364751        |
| 1746524099        | 1910        | 1910        | Romeo and Juliet in Our Town                  | Romeo and Juliet in Our Town              |                               |                              | tt1390979        |
| 1746249751        | 1977        | 1977        | The Choirboys                                 | The Choirboys                             | Aldrich, Robert               | Robert Aldrich               | tt0075845        |
| 1746422951        | 1994        | 1994        | The Shadow                                    | The Shadow                                | Mulcahy, Russell              | Russell Mulcahy              | tt0111143        |
| 1746574293        | 1960        | 1960        | It Started in Naples                          | It Started in Naples                      | Shavelson, Melville           | Melville Shavelson           | tt0053957        |
| 1746513181        | 1923        | 1923        | What Love Will Do                             | What Love Will Do                         | Bradbury, Robert North        | Robert N. Bradbury           | tt0178096        |
| 1746408634        | 1986        | 1985        | Thunder Alley                                 | Thunder Alley                             | Cardone, J. S.                | J.S. Cardone                 | tt0090168        |
| 1746437371        | 1943        | 1943        | Fugitive from Sonora                          | Fugitive from Sonora                      | Bretherton, Howard            | Howard Bretherton            | tt0035907        |
| 1746520788        | 1925        | 1925        | After Business Hours                          | After Business Hours                      | St. Clair, Mal                | Malcolm St. Clair            | tt0015545        |

|            |      |      |                                                |                                            |                      |                     |           |
|------------|------|------|------------------------------------------------|--------------------------------------------|----------------------|---------------------|-----------|
| 1746423039 | 1996 | 1996 | The Chamber                                    | The Chamber                                | Foley, James         | James Foley         | tt0115862 |
| 1746392882 | 1983 | 1983 | The Lonely Lady                                | The Lonely Lady                            | Sasdy, Peter         | Peter Sasdy         | tt0085863 |
| 1746585046 | 1940 | 1940 | The Golden Trail                               | The Golden Trail                           | Herman, Al           | Albert Herman       | tt0032540 |
| 1746507728 | 1925 | 1925 | Capital Punishment                             | Capital Punishment                         | Hogan, James P.      | James P. Hogan      | tt0015669 |
| 1746500987 | 1922 | 1922 | Heroes and Husbands                            | Heroes and Husbands                        | Withey, Chet         | Chester Withey      | tt0134720 |
| 1746502349 | 1915 | 1915 | The Apaches of Paris                           | The Apaches of Paris                       | Ellis, Robert        | Robert Ellis        | tt0004902 |
| 1746566904 | 1933 | 1934 | What's Your Racket                             | What's Your Racket?                        | Guiol, Fred          | Fred Guiol          | tt0165538 |
| 1746554018 | 1964 | 1964 | Seven Days in May                              | Seven Days in May                          | Frankenheimer, John  | John Frankenheimer  | tt0058576 |
| 1746577532 | 1936 | 1936 | Daniel Boone                                   | Daniel Boone                               | Howard, David        | David Howard        | tt0027499 |
| 1746502422 | 1915 | 1915 | Sweet Alyssum                                  | Sweet Alyssum                              | Campbell, Colin      | Colin Campbell      | tt0006128 |
| 1746520048 | 1926 | 1926 | Tin Hats                                       | Tin Hats                                   | Sedgwick, Edward     | Edward Sedgwick     | tt0017473 |
| 1746219172 | 1971 | 1971 | Plaza Suite                                    | Plaza Suite                                | Hiller, Arthur       | Arthur Hiller       | tt0067589 |
| 1745340979 | 2010 | 2010 | Robin Hood                                     | Robin Hood                                 | Scott, Ridley        | Ridley Scott        | tt0955308 |
| 1746577760 | 1937 | 1937 | Woman-Wise                                     | Woman Wise                                 | Dwan, Allan          | Allan Dwan          | tt0029791 |
| 1746271974 | 1966 | 1966 | A Fine Madness                                 | A Fine Madness                             | Kershner, Irvin      | Irvin Kershner      | tt0060414 |
| 1746578721 | 1950 | 1950 | Mystery Submarine                              | Mystery Submarine                          | Sirk, Douglas        | Douglas Sirk        | tt0042772 |
| 1746498276 | 1920 | 1920 | The Coast of Opportunity                       | The Coast of Opportunity                   | Warde, Ernest C.     | Ernest C. Warde     | tt0193826 |
| 1746580894 | 1936 | 1936 | The Invisible Ray                              | The Invisible Ray                          | Hillyer, Lambert     | Lambert Hillyer     | tt0027800 |
| 1746581076 | 1951 | 1951 | Fingerprints Don't Lie                         | Fingerprints Don't Lie                     | Newfield, Samuel     | Sam Newfield        | tt0043535 |
| 1746565896 | 1957 | 1957 | The Sad Sack                                   | The Sad Sack                               | Marshall, George     | George Marshall     | tt0050922 |
| 1746583758 | 1928 | 1928 | Blockade                                       | Blockade                                   | Seitz, George B.     | George B. Seitz     | tt0018709 |
| 1746524524 | 1916 | 1916 | Two News Items                                 | Two News Items                             | Sloman, Edward       | Edward Sloman       | tt0468235 |
| 1746508416 | 1924 | 1924 | The Slanderers                                 | The Slanderers                             | Ross, Nat            | Nat Ross            | tt0015340 |
| 1746581949 | 1930 | 1930 | Passion Flower                                 | Passion Flower                             | de Mille, William    | William C. de Mille | tt0021240 |
| 1746218999 | 1971 | 1971 | Point of Terror                                | Point of Terror                            | Nicol, Alex          | Alex Nicol          | tt0067594 |
| 1746581225 | 1950 | 1950 | Triple Trouble                                 | Triple Trouble                             | Yarbrough, Jean      | Jean Yarbrough      | tt0043071 |
| 1746583527 | 1931 | 1931 | Law of the Tong                                | The Law of the Tong                        | Collins, Lew         | Lewis D. Collins    | tt0022061 |
| 1746582100 | 1930 | 1930 | Sin Takes a Holiday                            | Sin Takes a Holiday                        | Stein, Paul L.       | Paul L. Stein       | tt0021377 |
| 1746530713 | 1948 | 1948 | The Wreck of the Hesperus                      | The Wreck of the Hesperus                  | Hoffman, John        | John Hoffman        | tt0040977 |
| 1746500106 | 1924 | 1924 | Trigger Finger                                 | Trigger Fingers                            | Eason, Breezy Reeves | B. Reeves Eason     | tt0015430 |
| 1746423751 | 1998 | 1998 | Black Dog                                      | Black Dog                                  | Hooks, Kevin         | Kevin Hooks         | tt0120610 |
| 1746581008 | 1961 | 1961 | Creature From the Haunted Sea                  | Creature from the Haunted Sea              | Corman, Roger        | Roger Corman        | tt0054768 |
| 1746435686 | 1943 | 1943 | The Crime Doctor's Strangest Case              | The Crime Doctor's Strangest Case          | Forde, Eugene J.     | Eugene Forde        | tt0035767 |
| 1746566294 | 1954 | 1954 | The Steel Cage                                 | The Steel Cage                             | Doniger, Walter      | Walter Doniger      | tt0047524 |
| 1746509020 | 1924 | 1924 | Young Ideas                                    | Young Ideas                                | Hill, Robert F.      | Robert F. Hill      | tt0015519 |
| 1746570291 | 1933 | 1933 | Terror Aboard                                  | Terror Aboard                              | Sloane, Paul         | Paul Sloane         | tt0024649 |
| 1746578966 | 1951 | 1951 | Hot Lead                                       | Hot Lead                                   | Gilmore, Stuart      | Stuart Gilmore      | tt0043657 |
| 1746500671 | 1926 | 1926 | The Sea Beast                                  | The Sea Beast                              | Webb, Millard        | Millard Webb        | tt0017354 |
| 1746210709 | 1971 | 1971 | Willard                                        | Willard                                    | Mann, Daniel         | Daniel Mann         | tt0067991 |
| 1746578553 | 1961 | 1961 | The Phantom Planet                             | The Phantom Planet                         | Marshall, William    | William Marshall    | tt0055294 |
| 1746465298 | 1942 | 1942 | Secret Agent of Japan                          | Secret Agent of Japan                      | Pichel, Irving       | Irving Pichel       | tt0035298 |
| 1746514741 | 1927 | 1927 | Better Days                                    | Better Days                                | Mattison, Frank S.   | Frank S. Mattison   | tt0017670 |
| 1746500575 | 1925 | 1925 | Smilin' at Trouble                             | Smilin' at Trouble                         | Garson, Harry        | Harry Garson        | tt0165481 |
| 1746523338 | 1916 | 1916 | The Old Watchman                               | The Old Watchman                           | Kent, Leon D.        | Leon De La Mothe    | tt0864859 |
| 1746219374 | 1971 | 1971 | The Panic in Needle Park                       | The Panic in Needle Park                   | Schatzberg, Jerry    | Jerry Schatzberg    | tt0067549 |
| 1746566340 | 1958 | 1958 | Girls on the Loose                             | Girls on the Loose                         | Henreid, Paul        | Paul Henreid        | tt0051663 |
| 1769975292 | 1916 | 1916 | Eleanor's Catch                                | Eleanor's Catch                            | Madison, Cleo        | Cleo Madison        | tt0251069 |
| 1746560011 | 1965 | 1965 | The Sandpiper                                  | The Sandpiper                              | Minnelli, Vincente   | Vincente Minnelli   | tt0059674 |
| 1746514418 | 1910 | 1910 | The Stepmother                                 | The Stepmother                             |                      | Sidney Olcott       | tt0255619 |
| 1746571660 | 1931 | 1931 | Night Beat                                     | Night Beat                                 | Seitz, George        | George B. Seitz     | tt0022206 |
| 1746508244 | 1926 | 1926 | Across the Pacific                             | Across the Pacific                         | Del Ruth, Roy        | Roy Del Ruth        | tt0016575 |
| 1746454699 | 1944 | 1944 | Tampico                                        | Tampico                                    | Mendes, Lothar       | Lothar Mendes       | tt0037346 |
| 1746501173 | 1915 | 1915 | A Man's Making                                 | A Man's Making                             | Pratt, Jack          | Jack Pratt          | tt0005710 |
| 1746574965 | 1933 | 1934 | The Whirlwind Rider                            | The Whirlwind Rider                        |                      | Robert J. Horner    | tt0176323 |
| 1746218686 | 1971 | 1971 | Who Is Harry Kellerman and Why Is He Saying Th | Who Is Harry Kellerman and Why Is He Sayin | Grosbard, Ulu        | Ulu Grosbard        | tt0067980 |
| 1746577896 | 1935 | 1935 | Life Begins at 40                              | Life Begins at 40                          | Marshall, George     | George Marshall     | tt0026629 |
| 1746421295 | 1994 | 1994 | Love Affair                                    | Love Affair                                | Caron, Glenn Gordon  | Glenn Gordon Caron  | tt0110391 |

|                   |             |             |                                 |                                 |                                     |                          |                  |
|-------------------|-------------|-------------|---------------------------------|---------------------------------|-------------------------------------|--------------------------|------------------|
| 1746251270        | 1979        | 1979        | "10"                            | 10                              | Edwards, Blake                      | Blake Edwards            | tt0078721        |
| 1746567451        | 1933        | 1933        | The Vampire Bat                 | The Vampire Bat                 | Strayer, Frank                      | Frank R. Strayer         | tt0024727        |
| 1746574009        | 1960        | 1960        | The Horse with the Flying Tail  | The Horse with the Flying Tail  | Lansburgh, Larry                    | Larry Lansburgh          | tt0054993        |
| 1746507611        | 1927        | 1927        | The Thirteenth Juror            | The Thirteenth Juror            | Laemmle, Edward                     | Edward Laemmle           | tt0018481        |
| 1746561576        | 1932        | 1932        | Midnight Morals                 | Midnight Morals                 | Hopper, E. Mason                    | B. Reeves Eason          | tt0023219        |
| 1746218777        | 1972        | 1972        | Trouble Man                     | Trouble Man                     | Dixon, Ivan                         | Ivan Dixon               | tt0069414        |
| 1746566217        | 1953        | 1953        | Sky Commando                    | Sky Commando                    | Sears, Fred F.                      | Fred F. Sears            | tt0046326        |
| 1746560788        | 1932        | 1932        | Two Kinds of Women              | Two Kinds of Women              | deMille, William C.                 | William C. de Mille      | tt0023627        |
| 1746583683        | 1931        | 1931        | Ambassador Bill                 | Ambassador Bill                 | Taylor, Sam                         | Sam Taylor               | tt0021606        |
| 1746574810        | 1935        | 1935        | The Crusades                    | The Crusades                    | DeMille, Cecil B.                   | Cecil B. DeMille         | tt0026249        |
| 1746235338        | 1974        | 1974        | Homebodies                      | Homebodies                      | Yust, Larry                         | Larry Yust               | tt0071617        |
| 1746410156        | 1992        | 1992        | Boomerang                       | Boomerang                       | Hudlin, Reginald                    | Reginald Hudlin          | tt0103859        |
| 1746503236        | 1921        | 1921        | My Lady Friends                 | My Lady Friends                 | Ingraham, Lloyd                     | Lloyd Ingraham           | tt0012487        |
| 1746568225        | 1934        | 1934        | Racketeer Round-Up              | Racketeer Round up              | Hoyt, Robert                        | Jerry Callahan           | tt0144227        |
| 1746569843        | 1960        | 1960        | Four Fast Guns                  | Four Fast Guns                  | Hole, William J.                    | William J. Hole Jr.      | tt0052819        |
| <b>1746515040</b> | <b>1922</b> | <b>1922</b> | <b>A Dangerous Adventure</b>    | <b>A Dangerous Adventure</b>    | <b>Warner, Sam; Warner, Jack L.</b> | <b>Jack L. Warner</b>    | <b>tt0013046</b> |
| 1746500111        | 1949        | 1949        | City Across the River           | City Across the River           | Shane, Maxwell                      | Maxwell Shane            | tt0041251        |
| 1746497076        | 1919        | 1919        | Loot                            | Loot                            | Dowlan, William C.                  | William C. Dowlan        | tt0010384        |
| 1746248343        | 1966        | 1966        | Waco                            | Waco                            | Springsteen, R. G.                  | R.G. Springsteen         | tt0061169        |
| 1746500364        | 1949        | 1949        | Too Late for Tears              | Too Late for Tears              | Haskin, Byron                       | Byron Haskin             | tt0041968        |
| 1746500092        | 1924        | 1924        | The Age of Innocence            | The Age of Innocence            | Ruggles, Wesley                     | Wesley Ruggles           | tt0014651        |
| 1746554824        | 1955        | 1955        | Santa Fe Passage                | Santa Fe Passage                | Witney, William                     | William Witney           | tt0048584        |
| 1745342021        | 2004        | 2004        | The Last Shot                   | The Last Shot                   | Nathanson, Jeff                     | Jeff Nathanson           | tt0357054        |
| 1746514958        | 1916        | 1916        | The Writing on the Wall         | The Writing on the Wall         | Johnson, Tefft                      | Tefft Johnson            | tt0007594        |
| 1746500225        | 1926        | 1926        | Christine of the Big Tops       | Christine of the Big Tops       | Mayo, Archie                        | Archie Mayo              | tt0016727        |
| 1746583005        | 1936        | 1936        | The Unknown Ranger              | The Unknown Ranger              | Bennet, Spencer Gordon              | Spencer Gordon Bennet    | tt0028448        |
| 1746532834        | 1928        | 1928        | The Magnificent Flirt           | The Magnificent Flirt           | D'Arrast, Harry d'Abbadie           | Harry d'Abbadie d'Arrast | tt0019125        |
| 1746577608        | 1934        | 1934        | Riptide                         | Riptide                         | Goulding, Edmund                    | Edmund Goulding          | tt0025720        |
| 1746574386        | 1962        | 1962        | Shoot Out at Big Sag            | Shoot Out at Big Sag            | Kay, Roger                          | Roger Kay                | tt0056484        |
| 1746491963        | 1948        | 1948        | The Sign of the Ram             | The Sign of the Ram             | Sturges, John                       | John Sturges             | tt0040785        |
| 1746394508        | 1982        | 1981        | The Chosen                      | The Chosen                      | Kagan, Jeremy Paul                  | Jeremy Kagan             | tt0082175        |
| 1746584734        | 1929        | 1929        | The Man and the Moment          | The Man and the Moment          | Fitzmaurice, George                 | George Fitzmaurice       | tt0020136        |
| 1745302758        | 2006        | 2006        | Who Killed the Electric Car?    | Who Killed the Electric Car?    | Paine, Chris                        | Chris Paine              | tt0489037        |
| 1746199235        | 1969        | 1969        | Easy Rider                      | Easy Rider                      | Hopper, Dennis                      | Dennis Hopper            | tt0064276        |
| 1746465137        | 1945        | 1945        | Danger Signal                   | Danger Signal                   | Florey, Robert                      | Robert Florey            | tt0037632        |
| 1745342500        | 2009        | 2009        | Miss March                      | Miss March                      | Cregger, Zach ; Moore, Trevor       | Zach Cregger             | tt1151922        |
| 1746580239        | 1937        | 1937        | Armored Car                     | Armored Car                     | Foster, Lewis R.                    | Lewis R. Foster          | tt0028585        |
| 1746454616        | 1945        | 1945        | Bells of Rosarita               | Bells of Rosarita               | McDonald, Frank                     | Frank McDonald           | tt0037535        |
| 1746498260        | 1920        | 1920        | The Lone Hand                   | The Lone Hand                   | Smith, Cliff                        | Clifford Smith           | tt0196711        |
| 1746575025        | 1938        | 1938        | The Rangers' Round-Up           | The Rangers' Round Up           | Newfield, Sam                       | Sam Newfield             | tt0030653        |
| 1746566525        | 1952        | 1952        | Love Is Better Than Ever        | Love Is Better Than Ever        | Donen, Stanley                      | Stanley Donen            | tt0044852        |
| 1746454764        | 1998        | 1998        | Godzilla                        | Godzilla                        | Emmerich, Roland                    | Roland Emmerich          | tt0120685        |
| 1746199535        | 1969        | 1969        | The Bridge at Remagen           | The Bridge at Remagen           | Guillermin, John                    | John Guillermin          | tt0064110        |
| 1746569648        | 1958        | 1958        | Hong Kong Affair                | Hong Kong Affair                | Heard, Paul F.                      | Paul F. Heard            | tt0051735        |
| 1746577758        | 1936        | 1936        | M'Liss                          | M'Liss                          | Nicholls, George                    | George Nichols Jr.       | tt0027921        |
| 1746235698        | 1974        | 1974        | Herbie Rides Again              | Herbie Rides Again              | Stevenson, Robert                   | Robert Stevenson         | tt0071607        |
| 1746219203        | 1975        | 1975        | Hearts of the West              | Hearts of the West              | Zieff, Howard                       | Howard Zieff             | tt0073096        |
| 1746496248        | 1921        | 1921        | Wise Husbands                   | Wise Husbands                   | Reicher, Frank                      | Frank Reicher            | tt0012854        |
| 1746454198        | 2000        | 2000        | Get Carter                      | Get Carter                      | Kay, Stephen                        | Stephen Kay              | tt0208988        |
| 2007987176        | 1928        | 1928        | All Washed Up                   | All Washed Up                   | Herman, Albert                      | Albert Herman            | tt0412326        |
| 1746487740        | 1917        | 1917        | A Jewel in Pawn                 | A Jewel in Pawn                 | Conway, Jack                        | Jack Conway              | tt0008147        |
| 1746576626        | 1910        | 1910        | The Dancing Girl of Butte       | The Dancing Girl of Butte       | Griffith, D. W.                     | D.W. Griffith            | tt0001176        |
| 1746580402        | 1936        | 1936        | The House of a Thousand Candles | The House of a Thousand Candles | Lubin, Arthur                       | Arthur Lubin             | tt0027764        |
| 1746550120        | 1954        | 1954        | Carnival Story                  | Carnival Story                  | Neumann, Kurt                       | Kurt Neumann             | tt0046829        |
| 1746566122        | 1954        | 1954        | Roogie's Bump                   | Roogie's Bump                   | Young, Harold                       | Harold Young             | tt0047428        |
| 1745271906        | 2001        | 2001        | Blow                            | Blow                            | Demme, Ted                          | Ted Demme                | tt0221027        |
| 1746554108        | 1964        | 1964        | Honeymoon Hotel                 | Honeymoon Hotel                 | Levin, Henry                        | Henry Levin              | tt0058204        |

|                   |             |             |                                            |                                            |                            |                                     |                  |
|-------------------|-------------|-------------|--------------------------------------------|--------------------------------------------|----------------------------|-------------------------------------|------------------|
| 1746582311        | 1929        | 1929        | The Forward Pass                           | The Forward Pass                           | Cline, Eddie               | Edward F. Cline                     | tt0019895        |
| 1746420391        | 1989        | 1988        | Buy & Cell                                 | Buy & Cell                                 | Boris, Robert              | Robert Boris                        | tt0096997        |
| 1746523286        | 1916        | 1916        | La Vie De Boheme                           | La vie de Bohème                           | Capellani, Albert          | Albert Capellani                    | tt0006456        |
| 1746580648        | 1935        | 1935        | Dr. Socrates                               | Dr. Socrates                               | Dieterle, William          | William Dieterle                    | tt0026293        |
| 1746475504        | 1944        | 1944        | Cowboy from Lonesome River                 | Cowboy from Lonesome River                 | Kline, Benjamin            | Benjamin H. Kline                   | tt0036726        |
| 1746500655        | 1926        | 1926        | The Broadway Gallant                       | The Broadway Gallant                       | Mason, Noel                | Noel M. Smith                       | tt0016683        |
| 1746218823        | 1973        | 1973        | Jesus Christ Superstar                     | Jesus Christ Superstar                     | Jewison, Norman            | Norman Jewison                      | tt0070239        |
| 1746454366        | 1943        | 1943        | Guadalcanal Diary                          | Guadalcanal Diary                          | Seiler, Lewis              | Lewis Seiler                        | tt0035957        |
| 1746501622        | 1910        | 1910        | A Westerner's Way                          | A Westerner's Way                          |                            | Gilbert M. 'Broncho Billy' Anderson | tt0001451        |
| 1769977352        | 1975        | 1975        | Linda Lovelace for President               | Linda Lovelace for President               | Guzman, Claudio            | Claudio Guzmán                      | tt0074800        |
| 1746581337        | 1910        | 1910        | The Kentucky Pioneer                       | The Kentucky Pioneer                       |                            |                                     | tt1371128        |
| 1746574868        | 1935        | 1935        | The Great Impersonation                    | The Great Impersonation                    | Crosland, Alan             | Alan Crosland                       | tt0026438        |
| 1746500507        | 1949        | 1949        | Forgotten Women                            | Forgotten Women                            | Beaudine, William          | William Beaudine                    | tt0041384        |
| 1746577438        | 1961        | 1961        | The Silent Call                            | The Silent Call                            | Bushelman, John            | John A. Bushelman                   | tt0055449        |
| 1746474390        | 1948        | 1948        | Race Street                                | Race Street                                | Marin, Edwin L.            | Edwin L. Marin                      | tt0040719        |
| 1746514896        | 1923        | 1923        | The Marriage Market                        | The Marriage Market                        | Le Saint, Edward J.        | Edward LeSaint                      | tt0014259        |
| 1746553679        | 1964        | 1964        | Bedtime Story                              | Bedtime Story                              | Levy, Ralph                | Ralph Levy                          | tt0057878        |
| 1746573985        | 1957        | 1957        | Joe Butterfly                              | Joe Butterfly                              | Hibbs, Jesse               | Jesse Hibbs                         | tt0050564        |
| 1746501162        | 1916        | 1916        | The Idol of the Stage                      | The Idol of the Stage                      | Garrick, Richard           | Richard Garrick                     | tt0145833        |
| 1746555416        | 1956        | 1956        | Secret of Treasure Mountain                | Secret of Treasure Mountain                | Friedman, Seymour          | Seymour Friedman                    | tt0049732        |
| 1746549870        | 1955        | 1955        | The Marauders                              | The Marauders                              | Mayer, Gerald              | Gerald Mayer                        | tt0048351        |
| 1746520976        | 1950        | 1950        | Let's Dance                                | Let's Dance                                | McLeod, Norman Z.          | Norman Z. McLeod                    | tt0042674        |
| 1746250614        | 1975        | 1975        | The Eiger Sanction                         | The Eiger Sanction                         | Eastwood, Clint            | Clint Eastwood                      | tt0072926        |
| 1746584905        | 1940        | 1940        | Give Us Wings                              | Give Us Wings                              | Lamont, Charles            | Charles Lamont                      | tt0032533        |
| <b>1746503025</b> | <b>1915</b> | <b>1915</b> | <b>The Breath of Araby</b>                 | <b>The Breath of Araby</b>                 | <b>Gaskill, Charles L.</b> | <b>Charles L. Gaskill</b>           | <b>tt0004998</b> |
| 1746572364        | 1910        | 1910        | The Clay Baker                             | The Clay Baker                             |                            |                                     | tt1146339        |
| 1746453759        | 1941        | 1941        | Secret of the Wastelands                   | Secret of the Wastelands                   | Abrahams, Derwin           | Derwin Abrahams                     | tt0034166        |
| 1746475931        | 1944        | 1945        | The Man in Half Moon Street                | The Man in Half Moon Street                | Murphy, Ralph              | Ralph Murphy                        | tt0037046        |
| 1746433537        | 1990        | 1990        | Mr. Destiny                                | Mr. Destiny                                | Orr, James                 | James Orr                           | tt0100201        |
| 1746393964        | 1989        | 1988        | Let's Get Lost                             | Let's Get Lost                             | Weber, Bruce               | Bruce Weber                         | tt0095515        |
| 1746577565        | 1935        | 1935        | The Girl Friend                            | The Girl Friend                            | Buzzell, Edward N.         | Edward Buzzell                      | tt0026411        |
| 1746573356        | 1932        | 1932        | My Pal the King                            | My Pal, the King                           | Neumann, Kurt              | Kurt Neumann                        | tt0023255        |
| 1746410662        | 1993        | 1992        | The Opposite Sex and How to Live with Them | The Opposite Sex and How to Live with Ther | Meshehoff, Matthew         | Matthew Meshehoff                   | tt0105063        |
| 1746235872        | 1974        | 1974        | Benji                                      | Benji                                      | Camp, Joe                  | Joe Camp                            | tt0071206        |
| 1746514316        | 1915        | 1915        | Vanity Fair                                | Vanity Fair                                | Nowland, Eugene            | Charles Brabin                      | tt0006210        |
| 1746583950        | 1931        | 1931        | The Montana Kid                            | The Montana Kid                            | Fraser, Harry              | Harry L. Fraser                     | tt0022159        |
| 1746208376        | 1967        | 1967        | The Christmas Kid                          | The Christmas Kid                          | Pink, Sidney               | Sidney W. Pink                      | tt0061844        |
| 1746574434        | 1958        | 1957        | Spanish Affair                             | Spanish Affair                             | Siegel, Donald             | Luis Marquina                       | tt0052230        |
| 1746492378        | 1946        | 1946        | The Glass Alibi                            | The Glass Alibi                            | Wilder, W. Lee             | W. Lee Wilder                       | tt0038565        |
| 1746574928        | 1933        | 1933        | The Wrecker                                | The Wrecker                                | Rogell, Albert             | Albert S. Rogell                    | tt0024790        |
| 1746503652        | 1920        | 1920        | Nurse Marjorie                             | Nurse Marjorie                             | Taylor, William Desmond    | William Desmond Taylor              | tt0011522        |
| 1746565201        | 1952        | 1952        | Okinawa                                    | Okinawa                                    | Jason, Leigh               | Leigh Jason                         | tt0044987        |
| 1746570369        | 1934        | 1934        | Six of a Kind                              | Six of a Kind                              | McCarey, Leo               | Leo McCarey                         | tt0025799        |
| 1746508446        | 1926        | 1926        | A Desperate Moment                         | A Desperate Moment                         | Dawn, Jack                 | Jack Dawn                           | tt0016779        |
| 1746582240        | 1930        | 1930        | Sarah and Son                              | Sarah and Son                              | Arzner, Dorothy            | Dorothy Arzner                      | tt0021335        |
| 1746583099        | 1938        | 1938        | When G-Men Step In                         | When G Men Step In                         | Coleman, C. C.             | Charles C. Coleman                  | tt0030967        |
| 1746570381        | 1934        | 1934        | Massacre                                   | Massacre                                   | Crosland, Alan             | Alan Crosland                       | tt0025479        |
| 1746581590        | 1928        | 1928        | Turn Back the Hours                        | Turn Back the Hours                        | Bretherton, Howard         | Howard Bretherton                   | tt0019497        |
| 1746585422        | 1940        | 1940        | Kit Carson                                 | Kit Carson                                 | Seitz, George B.           | George B. Seitz                     | tt0032670        |
| 1746555529        | 1954        | 1954        | Monster from the Ocean Floor               | Monster from the Ocean Floor               | Ordung, Wyatt              | Wyott Ordnung                       | tt0047244        |
| 1746585200        | 1930        | 1930        | Not So Dumb                                | Not So Dumb                                | Vidor, King                | King Vidor                          | tt0021189        |
| 1746498668        | 1921        | 1921        | Dynamite Allen                             | Dynamite Allen                             | Henderson, Del             | Dell Henderson                      | tt0012128        |
| 1746271890        | 1967        | 1967        | You've Got To Be Smart                     | You've Got to Be Smart                     | Kadison, Ellis             | Ellis Kadison                       | tt0062514        |
| 1746508881        | 1925        | 1925        | Waking Up the Town                         | Waking Up the Town                         | Cruze, James               | James Cruze                         | tt0016497        |
| 1746509344        | 1925        | 1925        | The Lure of the Wild                       | The Lure of the Wild                       | Strayer, Frank R.          | Frank R. Strayer                    | tt0016057        |
| 1746560397        | 1965        | 1965        | Battle of the Bulge                        | Battle of the Bulge                        | Annakin, Ken               | Ken Annakin                         | tt0058947        |
| 1746533057        | 1923        | 1923        | The Satin Girl                             | The Satin Girl                             | Rosson, Arthur             | Arthur Rosson                       | tt0014437        |

|                   |             |             |                                                |                                                |                                      |                          |                  |
|-------------------|-------------|-------------|------------------------------------------------|------------------------------------------------|--------------------------------------|--------------------------|------------------|
| 1746566051        | 1955        | 1955        | A Life in the Balance                          | A Life in the Balance                          | Horner, Harry                        | Harry Horner             | tt0048301        |
| 1746581883        | 1930        | 1930        | The Pay Off                                    | The Pay Off                                    | Sherman, Lowell                      | Lowell Sherman           | tt0021092        |
| 1746583867        | 1929        | 1929        | The Doctor's Secret                            | The Doctor's Secret                            | de Mille, William C.                 | William C. de Mille      | tt0019827        |
| 1746523968        | 1915        | 1915        | Scandal                                        | Scandal                                        | Weber, Lois; Smalley, Phillips       | Phillips Smalley         | tt0006008        |
| 1746235348        | 1973        | 1973        | The Werewolf of Washington                     | The Werewolf of Washington                     | Ginsberg, Milton Moses               | Milton Moses Ginsberg    | tt0070908        |
| <b>1746578014</b> | <b>1934</b> | <b>1934</b> | <b>Jealousy</b>                                | <b>Jealousy</b>                                | <b>Neill, Roy William</b>            | <b>Roy William Neill</b> | <b>tt0025327</b> |
| 1746500057        | 1946        | 1946        | Three Strangers                                | Three Strangers                                | Negulesco, Jean                      | Jean Negulesco           | tt0039029        |
| 1746500094        | 1949        | 1949        | Square Dance Jubilee                           | Square Dance Jubilee                           | Landres, Paul                        | Paul Landres             | tt0041914        |
| 1746581389        | 1928        | 1928        | The Trail of Courage                           | Trail of Courage                               | Fox, Wallace W.                      | Wallace Fox              | tt0019490        |
| 1745303149        | 2005        | 2005        | Red Eye                                        | Red Eye                                        | Craven, Wes                          | Wes Craven               | tt0421239        |
| 1746453607        | 1944        | 1944        | Westward Bound                                 | Westward Bound                                 | Tansey, Robert                       | Robert Emmett Tansey     | tt0037456        |
| 1746553545        | 1965        | 1965        | Man Outside                                    | Man Outside                                    | Marzano, Joseph                      | Joseph Marzano           | tt0289308        |
| 1746532855        | 1914        | 1914        | The Christian                                  | The Christian                                  | Thomson, Frederick A.                | Frederick A. Thomson     | tt0003771        |
| 1746580626        | 1938        | 1938        | The Rage of Paris                              | The Rage of Paris                              | Koster, Henry                        | Henry Koster             | tt0030652        |
| 1746487612        | 1921        | 1921        | The Whistle                                    | The Whistle                                    | Hillyer, Lambert                     | Lambert Hillyer          | tt0012839        |
| 1746585336        | 1930        | 1930        | Sins of the Children                           | The Sins of the Children                       | Wood, Sam                            | Sam Wood                 | tt0021382        |
| 1746585329        | 1929        | 1929        | Don't Get Nervous                              | Don't Get Nervous                              |                                      | Bryan Foy                | tt0230150        |
| 1769969881        | 1912        | 1912        | Winnie's Dance                                 | Winnie's Dance                                 |                                      | Ashley Miller            | tt0438605        |
| 1746487029        | 1918        | 1918        | The Doctor and the Woman                       | The Doctor and the Woman                       | Weber, Lois                          | Phillips Smalley         | tt0009016        |
| 1745342458        | 2001        | 2001        | Soul Survivors                                 | Soul Survivors                                 | Carpenter, Steve                     | Stephen Carpenter        | tt0218619        |
| 1746454286        | 1941        | 1941        | Six-Gun Gold                                   | Six Gun Gold                                   | Howard, David                        | David Howard             | tt0034195        |
| 1746524714        | 1914        | 1914        | The Little Angel of Canyon Creek               | The Little Angel of Canyon Creek               | Sturgeon, Rollin S.                  | Rollin S. Sturgeon       | tt0004234        |
| 1746423732        | 1941        | 1941        | Reg'lar Fellers                                | Reg'lar Fellers                                | Dreifuss, Arthur                     | Arthur Dreifuss          | tt0034089        |
| 1746408461        | 1990        | 1989        | Longtime Companion                             | Longtime Companion                             | Rene, Norman                         | Norman René              | tt0100049        |
| 1746487294        | 1920        | 1920        | On with the Dance                              | On with the Dance                              | Fitzmaurice, George                  | George Fitzmaurice       | tt0123205        |
| 1746520068        | 1925        | 1925        | Enemies of Youth                               | Enemies of Youth                               | Berthelet, Arthur                    | Arthur Berthelet         | tt0015779        |
| 1746574750        | 1933        | 1933        | A Bedtime Story                                | A Bedtime Story                                | Taurog, Norman                       | Norman Taurog            | tt0023787        |
| 1746572000        | 1931        | 1931        | It's a Wise Child                              | It's a Wise Child                              | Leonard, Robert Z.                   | Robert Z. Leonard        | tt0022007        |
| 1746515096        | 1921        | 1921        | Society Snobs                                  | Society Snobs                                  | Henley, Hobart                       | Hobart Henley            | tt0012709        |
| 1746503043        | 1911        | 1911        | Lassoing Wild Animals in Africa                | Lassoing Wild Animals in Africa                | Kearton (?), Cherry                  | Cherry Kearton           | tt4850720        |
| 1746512736        | 1915        | 1915        | The Immigrant                                  | The Immigrant                                  | Melford, George                      | George Melford           | tt0005535        |
| 1746465421        | 1941        | 1941        | Tom, Dick and Harry                            | Tom, Dick and Harry                            | Kanin, Garson                        | Garson Kanin             | tt0034299        |
| 1746561331        | 1957        | 1957        | Silk Stockings                                 | Silk Stockings                                 | Mamoulian, Rouben                    | Rouben Mamoulian         | tt0050972        |
| 1746582662        | 1938        | 1938        | Bar 20 Justice                                 | Bar 20 Justice                                 | Selander, Lesley                     | Lesley Selander          | tt0029895        |
| 1746520858        | 1948        | 1948        | The Velvet Touch                               | The Velvet Touch                               | Gage, John                           | Jack Gage                | tt0040934        |
| 1769971984        | 1969        | 1969        | Temporary Wives                                | Temporary Wives                                | Shamblin, Gene                       | Gene Shamblin            | tt0259628        |
| 1746567007        | 1932        | 1932        | This Sporting Age                              | This Sporting Age                              | Bennison, Andrew W.; Erickson, A. F. | Andrew Bennison          | tt0023586        |
| 1746577982        | 1936        | 1936        | Below the Deadline                             | Below the Deadline                             | Lamont, Charles                      | Charles Lamont           | tt0027348        |
| 1745357625        | 2008        | 2008        | W.                                             | W.                                             | Stone, Oliver                        | Oliver Stone             | tt1175491        |
| 1746410813        | 1987        | 1987        | Sweet Lorraine                                 | Sweet Lorraine                                 | Gomer, Steve                         | Steve Gomer              | tt0094086        |
| 1746501353        | 1915        | 1915        | The Price of Her Silence                       | The Price of Her Silence                       |                                      | Eugene Moore             | tt0005924        |
| 1746438629        | 1941        | 1941        | Men of the Timberland                          | Men of the Timberland                          | Rawlins, John                        | John Rawlins             | tt0033903        |
| 1746582059        | 1928        | 1928        | The Big Hop                                    | The Big Hop                                    | Horne, James W.                      | James W. Horne           | tt0018698        |
| <b>1746465060</b> | <b>1947</b> | <b>1947</b> | <b>Calcutta</b>                                | <b>Calcutta</b>                                | <b>Farrow, John</b>                  | <b>John Farrow</b>       | <b>tt0039235</b> |
| 1746435563        | 1943        | 1943        | Wild Horse Rustlers                            | Wild Horse Rustlers                            | Newfield, Sam                        | Sam Newfield             | tt0036536        |
| 1746580702        | 1936        | 1936        | Our Relations                                  | Our Relations                                  | Lachman, Harry                       | Harry Lachman            | tt0028070        |
| 1746570022        | 1934        | 1934        | Call It Luck                                   | Call It Luck                                   | Tinling, James                       | James Tinling            | tt0024943        |
| 1746250941        | 1980        | 1980        | Windows                                        | Windows                                        | Willis, Gordon                       | Gordon Willis            | tt0081759        |
| 1746532838        | 1923        | 1923        | Trilby                                         | Trilby                                         | Young, James                         | James Young              | tt0014562        |
| 1746582423        | 1935        | 1935        | The Little Colonel                             | The Little Colonel                             | Butler, David                        | David Butler             | tt0016029        |
| 1746583519        | 1951        | 1951        | Saddle Legion                                  | Saddle Legion                                  | Selander, Lesley                     | Lesley Selander          | tt0043987        |
| 1746438717        | 1999        | 1999        | The Hand Behind the Mouse: The Ub Iwerks Story | The Hand Behind the Mouse: The Ub Iwerks Story | Iwerks, Leslie                       | Leslie Iwerks            | tt0179496        |
| 1746465077        | 1946        | 1946        | The Chase                                      | The Chase                                      | Ripley, Arthur D.                    | Arthur Ripley            | tt0038409        |
| 1746393683        | 1983        | 1983        | National Lampoon's Vacation                    | National Lampoon's Vacation                    | Ramis, Harold                        | Harold Ramis             | tt0085995        |
| 1746566635        | 1932        | 1932        | Border Devils                                  | Border Devils                                  | Nigh, William                        | William Nigh             | tt0022705        |
| 1745309431        | 2005        | 2005        | Casanova                                       | Casanova                                       | Hallström, Lasse                     | Lasse Hallström          | tt0402894        |
| 1746438628        | 1943        | 1943        | Nobody's Darling                               | Nobody's Darling                               | Mann, Anthony                        | Anthony Mann             | tt0036211        |

1

1

|            |      |      |                                            |                                            |                                      |                       |           |
|------------|------|------|--------------------------------------------|--------------------------------------------|--------------------------------------|-----------------------|-----------|
| 1746453644 | 1941 | 1941 | Romance of the Rio Grande                  | Romance of the Rio Grande                  | Leeds, Herbert I.                    | Herbert I. Leeds      | tt0034124 |
| 1746507812 | 1949 | 1949 | Take One False Step                        | Take One False Step                        | Erskine, Chester                     | Chester Erskine       | tt0041945 |
| 1746570978 | 1934 | 1934 | Merry Wives of Reno                        | Merry Wives of Reno                        | Humberstone, H. Bruce                | H. Bruce Humberstone  | tt0025494 |
| 1746492472 | 1946 | 1946 | A Stolen Life                              | A Stolen Life                              | Bernhardt, Curtis                    | Curtis Bernhardt      | tt0038984 |
| 1746422515 | 1996 | 1996 | One Fine Day                               | One Fine Day                               | Hoffman, Michael                     | Michael Hoffman       | tt0117247 |
| 1746524443 | 1922 | 1922 | Broken Chains                              | Broken Chains                              | Holubar, Allen                       | Allen Holubar         | tt0012980 |
| 1746574407 | 1959 | 1958 | Anna Lucasta                               | Anna Lucasta                               | Laven, Arnold                        | Arnold Laven          | tt0051362 |
| 1746408628 | 1987 | 1986 | Allan Quatermain and the Lost City of Gold | Allan Quatermain and the Lost City of Gold | Nelson, Gary                         | Gary Nelson           | tt0092534 |
| 1746516328 | 1919 | 1919 | Six Feet Four                              | Six Feet Four                              | King, Henry                          | Henry King            | tt0010703 |
| 1746454236 | 1994 | 1994 | Paul Bowles: The Complete Outsider         | Paul Bowles: The Complete Outsider         | Warnow, Catherine; Weinreich, Regi   | Catherine Warnow      | tt0110798 |
| 1746555021 | 1957 | 1957 | The Girl in Black Stockings                | The Girl in Black Stockings                | Koch, Howard W.                      | Howard W. Koch        | tt0050439 |
| 1746475925 | 1945 | 1945 | Here Is Germany                            | Here Is Germany                            |                                      | Frank Capra           | tt0037773 |
| 1746577708 | 1935 | 1935 | Smart Girl                                 | Smart Girl                                 | Scotto, Aubrey                       | Aubrey Scotto         | tt0027013 |
| 1746566076 | 1956 | 1956 | Death of a Scoundrel                       | Death of a Scoundrel                       | Martin, Charles                      | Charles Martin        | tt0049130 |
| 1746491884 | 1947 | 1947 | Wild Horse Mesa                            | Wild Horse Mesa                            | Grissell, Wallace A.                 | Wallace Grissell      | tt0179533 |
| 1746491871 | 1946 | 1946 | Romance of the West                        | Romance of the West                        | Emmett, Robert                       | Robert Emmett Tansey  | tt0038892 |
| 1746582103 | 1910 | 1910 | In the Border States                       | In the Border States                       | Griffith, D. W.                      | D. W. Griffith        | tt0001265 |
| 1746422068 | 1999 | 1999 | American Movie                             | American Movie                             | Smith, Chris                         | Chris Smith           | tt0181288 |
| 1746502734 | 1915 | 1915 | The Shadows of a Great City                | The Shadows of a Great City                |                                      | Herbert Blaché        | tt0006030 |
| 1746438602 | 1941 | 1941 | Scattergood Pulls the Strings              | Scattergood Pulls the Strings              | Cabanne, Christy                     | Christy Cabanne       | tt0034155 |
| 1746581104 | 1951 | 1951 | As Young As You Feel                       | As Young as You Feel                       | Jones, Harmon                        | Harmon Jones          | tt0043299 |
| 1746520689 | 1926 | 1926 | Love's Blindness                           | Love's Blindness                           | Dillon, John Francis                 | John Francis Dillon   | tt0017086 |
| 1745293507 | 2006 | 2006 | Grandma's Boy                              | Grandma's Boy                              | Goossen, Nicholas                    | Nicholaus Goossen     | tt0456554 |
| 1746509050 | 1924 | 1924 | Broadway After Dark                        | Broadway After Dark                        | Bell, Monta                          | Monta Bell            | tt0014744 |
| 1746233779 | 1966 | 1966 | Harper                                     | Harper                                     | Smight, Jack                         | Jack Smight           | tt0060490 |
| 1746520159 | 1924 | 1924 | Nellie, The Beautiful Cloak Model          | Nellie the Beautiful Cloak Model           | Flynn, Emmett                        | Emmett J. Flynn       | tt0015166 |
| 1745359219 | 2002 | 2002 | Cherish                                    | Cherish                                    | Taylor, Finn                         | Finn Taylor           | tt0298798 |
| 1746409309 | 1992 | 1992 | Consenting Adults                          | Consenting Adults                          | Pakula, Alan J.                      | Alan J. Pakula        | tt0104006 |
| 1746582404 | 1937 | 1937 | Navy Blue and Gold                         | Navy Blue and Gold                         | Wood, Sam                            | Sam Wood              | tt0029297 |
| 1746433714 | 1996 | 1996 | Dragonheart                                | DragonHeart                                | Cohen, Rob                           | Rob Cohen             | tt0116136 |
| 1746581326 | 1959 | 1960 | Career Girl                                | Career Girl                                | David, Harold                        | Harold David          | tt0052674 |
| 1746487520 | 1918 | 1918 | A Lion of the Hills                        | The Lion of the Hills                      |                                      | Lambert Hillyer       | tt0332209 |
| 1746465153 | 1942 | 1942 | Native Land                                | Native Land                                | Hurwitz, Leo; Strand, Paul           | Leo Hurwitz           | tt0035112 |
| 1746583805 | 1929 | 1929 | Thru Different Eyes                        | Thru Different Eyes                        | Blystone, John                       | John G. Blystone      | tt0020497 |
| 1746465091 | 1947 | 1947 | Violence                                   | Violence                                   | Bernhard, Jack                       | Jack Bernhard         | tt0039960 |
| 1746423973 | 1942 | 1942 | Army Surgeon                               | Army Surgeon                               | Sutherland, A. Edward                | A. Edward Sutherland  | tt0034473 |
| 1746520603 | 1925 | 1925 | The Pace That Thrills                      | The Pace That Thrills                      | Campbell, Webster                    | Webster Campbell      | tt0016193 |
| 1745393833 | 2008 | 2007 | Chris & Don: A Love Story                  | Chris & Don. A Love Story                  | Santi, Guido ; Mascara, Tina         | Tina Mascara          | tt1138002 |
| 1746394455 | 1986 | 1985 | Seven Minutes in Heaven                    | Seven Minutes in Heaven                    | Feferman, Linda                      | Linda Feferman        | tt0089997 |
| 1746570229 | 1934 | 1934 | British Agent                              | British Agent                              | Curtiz, Michael                      | Michael Curtiz        | tt0024915 |
| 1746569851 | 1960 | 1960 | A Breath of Scandal                        | A Breath of Scandal                        | Curtiz, Michael                      | Michael Curtiz        | tt0053675 |
| 1746523374 | 1916 | 1916 | The Dollar and the Law                     | The Dollar and the Law                     | North, Wilfred                       | Wilfrid North         | tt0157548 |
| 1746507788 | 1949 | 1949 | The Big Sombrero                           | The Big Sombrero                           | McDonald, Frank                      | Frank McDonald        | tt0041177 |
| 1745309401 | 2007 | 2007 | The Nanny Diaries                          | The Nanny Diaries                          | Pulcini, Robert; Berman, Shari Sprin | Shari Springer Berman | tt0489237 |
| 1746524074 | 1916 | 1916 | The Bugle Call                             | The Bugle Call                             | Barker, Reginald                     | Reginald Barker       | tt0006475 |
| 1746491862 | 1944 | 1944 | Frenchman's Creek                          | Frenchman's Creek                          | Leisen, Mitchell                     | Mitchell Leisen       | tt0036840 |
| 1746509045 | 1926 | 1926 | Eyes of the Desert                         | Eyes of the Desert                         | Reel, Frederick                      | Frederick Reel Jr.    | tt0322229 |
| 1746574811 | 1937 | 1936 | Sing Me a Love Song                        | Sing Me a Love Song                        | Enright, Ray                         | Ray Enright           | tt0028254 |
| 1746435531 | 1942 | 1942 | Tough As They Come                         | Tough As They Come                         | Nigh, William                        | William Nigh          | tt0035461 |
| 1746474493 | 1947 | 1947 | Three on a Ticket                          | Three on a Ticket                          | Newfield, Sam                        | Sam Newfield          | tt0039899 |
| 1746454972 | 1997 | 1997 | Jungle 2 Jungle                            | Jungle 2 Jungle                            | Pasquin, John                        | John Pasquin          | tt0119432 |
| 1746486131 | 1919 | 1919 | The Long Arm of Mannister                  | The Long Arm of Mannister                  | Bracken, Bertram                     | Bertram Bracken       | tt0010380 |
| 1746271198 | 1979 | 1979 | Meteor                                     | Meteor                                     | Neame, Ronald                        | Ronald Neame          | tt0079550 |
| 1746530749 | 1949 | 1949 | It's a Great Feeling                       | It's a Great Feeling                       | Butler, David                        | David Butler          | tt0041515 |
| 1746419403 | 1986 | 1986 | Running Scared                             | Running Scared                             | Hyams, Peter                         | Peter Hyams           | tt0091875 |
| 1769969356 | 1964 | 1964 | White Slaves of Chinatown                  | White Slaves of Chinatown                  | Mawra, Joseph P.                     | Joseph P. Mawra       | tt0129598 |
| 1746475533 | 1945 | 1945 | Love Letters                               | Love Letters                               | Dieterle, William                    | William Dieterle      | tt0037885 |



|            |      |      |                                     |                                     |                                   |                      |           |
|------------|------|------|-------------------------------------|-------------------------------------|-----------------------------------|----------------------|-----------|
| 1745302884 | 2007 | 2007 | Underdog                            | Underdog                            | Du Chau, Frederik                 | Frederik Du Chau     | tt0467110 |
| 1746419804 | 1990 | 1990 | The Hunt for Red October            | The Hunt for Red October            | McTiernan, John                   | John McTiernan       | tt0099810 |
| 1746520489 | 1925 | 1925 | The Fugitive                        | The Fugitive                        | Wilson, Ben                       | Ben F. Wilson        | tt0133783 |
| 1746553587 | 1965 | 1965 | The Outlaws Is Coming               | The Outlaws Is Coming               | Maurer, Norman                    | Norman Maurer        | tt0059558 |
| 1746509572 | 1949 | 1949 | Project X                           | Project X                           | Montagne, Edward J.               | Edward Montagne      | tt0041770 |
| 1746486310 | 1919 | 1919 | A Fight for Love                    | A Fight for Love                    | Ford, Jack                        | John Ford            | tt0010119 |
| 1746269662 | 1979 | 1979 | Star Trek: The Motion Picture       | Star Trek: The Motion Picture       | Wise, Robert                      | Robert Wise          | tt0079945 |
| 1746408714 | 1985 | 1985 | The Sure Thing                      | The Sure Thing                      | Reiner, Rob                       | Rob Reiner           | tt0090103 |
| 1746498294 | 1919 | 1919 | The Outcasts of Poker Flats         | The Outcasts of Poker Flat          | Ford, Jack                        | John Ford            | tt0010544 |
| 1746581254 | 1960 | 1960 | Pretty Boy Floyd                    | Pretty Boy Floyd                    | Leder, Herbert J.                 | Herbert J. Leder     | tt0054204 |
| 1746524100 | 1910 | 1910 | Whist                               | Whist!                              |                                   | Tom Ricketts         | tt1644737 |
| 1746576952 | 1961 | 1961 | The Devil's Partner                 | Devil's Partner                     | Rondeau, Charles R.               | Charles R. Rondeau   | tt0051536 |
| 1746234377 | 1968 | 1968 | Lonesome Cowboys                    | Lonesome Cowboys                    | Warhol, Andy                      | Andy Warhol          | tt0063236 |
| 1746581370 | 1960 | 1961 | The Marriage-Go-Round               | The Marriage Go Round               | Lang, Walter                      | Walter Lang          | tt0054064 |
| 1746199017 | 1969 | 1968 | Krakatoa, East of Java              | Krakatoa: East of Java              | Kowalski, Bernard L.              | Bernard L. Kowalski  | tt0064555 |
| 1746577069 | 1951 | 1951 | Crazy Over Horses                   | Crazy Over Horses                   | Beaudine, William                 | William Beaudine     | tt0043432 |
| 1746503920 | 1921 | 1921 | The Beautiful Liar                  | The Beautiful Liar                  | Worsley, Wallace                  | Wallace Worsley      | tt0011955 |
| 1746580803 | 1936 | 1936 | The Girl from Mandalay              | The Girl from Mandalay              | Bretherton, Howard                | Howard Bretherton    | tt0027673 |
| 1746474444 | 1946 | 1946 | Tarzan and the Leopard Woman        | Tarzan and the Leopard Woman        | Neumann, Kurt                     | Kurt Neumann         | tt0039011 |
| 1746497023 | 1920 | 1920 | Empty Arms                          | Empty Arms                          | Reicher, Frank                    | Frank Reicher        | tt0011152 |
| 1746408468 | 1988 | 1988 | The Unbearable Lightness of Being   | The Unbearable Lightness of Being   | Kaufman, Philip                   | Philip Kaufman       | tt0096332 |
| 1746439141 | 1944 | 1944 | The Curse of the Cat People         | The Curse of the Cat People         | Fritsch, Gunther V.; Wise, Robert | Gunther von Fritsch  | tt0036733 |
| 1769970694 | 1968 | 1968 | Office Love-In, White Collar Style  | Office Love in, White Collar Style  | Stephen, A. C.                    | Stephen C. Apostolof | tt0063378 |
| 1746584466 | 1929 | 1929 | The Great Power                     | The Great Power                     | Rock, Joe                         | Joe Rock             | tt0019948 |
| 1746453509 | 1941 | 1941 | Tonto Basin Outlaws                 | Tonto Basin Outlaws                 | Luby, S. Roy                      | S. Roy Luby          | tt0034300 |
| 1746507797 | 1926 | 1926 | The Brown Derby                     | The Brown Derby                     | Hines, Charles                    | Charles Hines        | tt0016689 |
| 1746198171 | 1969 | 1969 | Bob & Carol & Ted & Alice           | Bob & Carol & Ted & Alice           | Mazursky, Paul                    | Paul Mazursky        | tt0064100 |
| 1746424451 | 1943 | 1943 | Holy Matrimony                      | Holy Matrimony                      | Stahl, John M.                    | John M. Stahl        | tt0036009 |
| 1746581948 | 1928 | 1928 | Red Riders of Canada                | Red Riders of Canada                | De Lacy, Robert                   | Robert De Lacey      | tt0019317 |
| 1746560921 | 1932 | 1932 | Fighting for Justice                | Fighting for Justice                | Brower, Otto                      | Otto Brower          | tt0024013 |
| 1746437375 | 1941 | 1941 | South of Panama                     | South of Panama                     | Yarbrough, Jean                   | Jean Yarbrough       | tt0034221 |
| 1746573893 | 1957 | 1957 | The Persuader                       | The Persuader                       | Ross, Dick                        | Dick Ross            | tt0050838 |
| 1746408493 | 1984 | 1984 | Reckless                            | Reckless                            | Foley, James                      | James Foley          | tt0087983 |
| 1746532479 | 1923 | 1923 | Potash and Perlmutter               | Potash and Perlmutter               | Badger, Clarence                  | Clarence G. Badger   | tt0014370 |
| 1746394738 | 1985 | 1985 | Krush Groove                        | Krush Groove                        | Schultz, Michael                  | Michael Schultz      | tt0089444 |
| 1746504145 | 1920 | 1920 | The Confession                      | The Confession                      | Bracken, Bertram                  | Bertram Bracken      | tt0011069 |
| 1746585417 | 1939 | 1939 | Homicide Bureau                     | Homicide Bureau                     | Coleman, C. C.                    | Charles C. Coleman   | tt0031438 |
| 1746504543 | 1919 | 1919 | Carolyn of the Corners              | Carolyn of the Corners              | Thornby, Robert                   | Robert Thornby       | tt0009990 |
| 1746484455 | 1918 | 1918 | The Girl of Today                   | The Girl of Today                   | Robertson, John                   | John S. Robertson    | tt0009114 |
| 1746199520 | 1965 | 1965 | Inside Daisy Clover                 | Inside Daisy Clover                 | Mulligan, Robert                  | Robert Mulligan      | tt0059314 |
| 1746492427 | 1946 | 1946 | Lawless Breed                       | Lawless Breed                       | Fox, Wallace W.                   | Wallace Fox          | tt0175840 |
| 1746492080 | 1944 | 1944 | Million Dollar Kid                  | Million Dollar Kid                  | Fox, Wallace                      | Wallace Fox          | tt0037074 |
| 1746577472 | 1960 | 1960 | Cash McCall                         | Cash McCall                         | Pevney, Joseph                    | Joseph Pevney        | tt0052680 |
| 1746273341 | 1979 | 1979 | Gas Pump Girls                      | Gas Pump Girls                      | Bender, Joel                      | Joel Bender          | tt0077597 |
| 1746574294 | 1959 | 1959 | The Scapegoat                       | The Scapegoat                       | Hamer, Robert                     | Robert Hamer         | tt0053247 |
| 1746408829 | 1987 | 1987 | Black Widow                         | Black Widow                         | Rafelson, Bob                     | Bob Rafelson         | tt0090738 |
| 1746580452 | 1935 | 1935 | Society Doctor                      | Society Doctor                      | Seitz, George B.                  | George B. Seitz      | tt0027020 |
| 1746409433 | 1988 | 1988 | The Telephone                       | The Telephone                       | Torn, Rip                         | Rip Torn             | tt0096241 |
| 1746582428 | 1935 | 1935 | The Glass Key                       | The Glass Key                       | Tuttle, Frank                     | Frank Tuttle         | tt0026416 |
| 1746512373 | 1910 | 1910 | The Luck of Roaring Camp            | Luck of Roaring Camp                | Porter, Edwin S.                  | Edwin S. Porter      | tt0001297 |
| 1746573979 | 1962 | 1962 | The Four Horsemen of the Apocalypse | The Four Horsemen of the Apocalypse | Minnelli, Vincente                | Vincente Minnelli    | tt0054890 |
| 1746454093 | 1940 | 1940 | The Tulsa Kid                       | The Tulsa Kid                       | Sherman, George                   | George Sherman       | tt0033189 |
| 1746503473 | 1918 | 1918 | Amarilly of Clothes-Line Alley      | Amarilly of Clothes Line Alley      | Neilan, Marshall A.               | Marshall Neilan      | tt0008827 |
| 1746438937 | 1941 | 1941 | Private Nurse                       | Private Nurse                       | Burton, David                     | David Burton         | tt0034068 |
| 1746234856 | 1966 | 1966 | Another Day, Another Man            | Another Day, Another Man            | Wishman, Doris                    | Doris Wishman        | tt0060111 |
| 1746584960 | 1940 | 1940 | Lucky Partners                      | Lucky Partners                      | Milestone, Lewis                  | Lewis Milestone      | tt0032733 |
| 1746503676 | 1918 | 1918 | Revelation                          | Revelation                          | Baker, George D.                  | George D. Baker      | tt0009543 |

|            |      |      |                            |                            |                          |                      |            |
|------------|------|------|----------------------------|----------------------------|--------------------------|----------------------|------------|
| 1746491830 | 1948 | 1948 | Jinx Money                 | Jinx Money                 | Beaudine, William        | William Beaudine     | tt0040489  |
| 1746210442 | 1971 | 1971 | Man in the Wilderness      | Man in the Wilderness      | Sarafian, Richard C.     | Richard C. Sarafian  | tt0067388  |
| 1769969915 | 1911 | 1911 | The Cowboy and the Outlaw  | The Cowboy and the Outlaw  |                          | Allan Dwan           | tt11290058 |
| 1745358895 | 2008 | 2008 | Saw V                      | Saw V                      | Hackl, David             | David Hackl          | tt1132626  |
| 1769970658 | 1968 | 1968 | A Piece of Her Action      | A Piece of Her Action      | Denby, Jerry             | Jerry Denby          | tt0254689  |
| 1746497237 | 1919 | 1919 | Faith                      | Faith                      | Swickard, Charles        | Charles Swickard     | tt0190390  |
| 1746454660 | 1945 | 1945 | The Lost Trail             | The Lost Trail             | Hillyer, Lambert         | Lambert Hillyer      | tt0037883  |
| 1769970606 | 1968 | 1968 | College Girls              | College Girls              | Stephen, A. C.           | Stephen C. Apostolof | tt0123705  |
| 1746569996 | 1956 | 1956 | Walk the Proud Land        | Walk the Proud Land        | Hibbs, Jesse             | Jesse Hibbs          | tt0049933  |
| 1746496424 | 1920 | 1920 | The Dangerous Paradise     | The Dangerous Paradise     | Earle, William P. S.     | William P.S. Earle   | tt0190348  |
| 1746500594 | 1950 | 1950 | Federal Agent at Large     | Federal Agent at Large     | Blair, George            | George Blair         | tt0042453  |
| 1746424453 | 1941 | 1941 | Appointment for Love       | Appointment for Love       | Seiter, William A.       | William A. Seiter    | tt0033348  |
| 1746577832 | 1935 | 1935 | No More Ladies             | No More Ladies             | Griffith, Edward H.      | Edward H. Griffith   | tt0026787  |
| 1746585423 | 1939 | 1939 | Texas Wildcats             | Texas Wildcats             | Newfield, Sam            | Sam Newfield         | tt0032014  |
| 1746492475 | 1948 | 1948 | Oklahoma Blues             | Oklahoma Blues             | Hillyer, Lambert         | Lambert Hillyer      | tt0040660  |
| 1746585311 | 1928 | 1928 | The Woman Disputed         | The Woman Disputed         | King, Henry; Taylor, Sam | Henry King           | tt0019589  |
| 1746577121 | 1950 | 1950 | The Toast of New Orleans   | The Toast of New Orleans   | Taugog, Norman           | Norman Taugog        | tt0043053  |
| 1746464788 | 1941 | 1941 | How Green Was My Valley    | How Green Was My Valley    | Ford, John               | John Ford            | tt0033729  |
| 1746503512 | 1918 | 1918 | The Great Adventure        | The Great Adventure        | Blaché, Alice            | Alice Guy            | tt0009128  |
| 1746561868 | 1954 | 1954 | The Last Time I Saw Paris  | The Last Time I Saw Paris  | Brooks, Richard          | Richard Brooks       | tt0047162  |
| 1746520525 | 1926 | 1926 | Watch Your Wife            | Watch Your Wife            | Gade, Svend              | Svend Gade           | tt0017530  |
| 1746569949 | 1954 | 1954 | Tobor the Great            | Tobor the Great            | Sholem, Lee              | Lee Sholem           | tt0047590  |
| 1746520647 | 1948 | 1948 | Train to Alcatraz          | Train to Alcatraz          | Ford, Philip             | Philip Ford          | tt0040895  |
| 1746573848 | 1958 | 1958 | Chase a Crooked Shadow     | Chase a Crooked Shadow     | Anderson, Michael        | Michael Anderson     | tt0050246  |
| 1746500652 | 1926 | 1926 | Crossed Signals            | Crossed Signals            | McGowan, J. P.           | J.P. McGowan         | tt0016749  |
| 1746437367 | 1941 | 1941 | The Flame of New Orleans   | The Flame of New Orleans   | Clair, René              | René Clair           | tt0033606  |
| 1746577967 | 1937 | 1937 | Fifty Roads to Town        | Fifty Roads to Town        | Taugog, Norman           | Norman Taugog        | tt0028866  |
| 1745358521 | 2002 | 2001 | Black Hawk Down            | Black Hawk Down            | Scott, Ridley            | Ridley Scott         | tt0265086  |
| 1746512646 | 1913 | 1913 | Ben Bolt                   | Ben Bolt                   | Hansel, Howell           | Howell Hansel        | tt0002678  |
| 1746422592 | 1994 | 1993 | Fear of a Black Hat        | Fear of a Black Hat        | Cundieff, Rusty          | Rusty Cundieff       | tt0106880  |
| 1746269472 | 1980 | 1980 | Wholly Moses!              | Wholly Moses!              | Weis, Gary               | Gary Weis            | tt0081751  |
| 1745309629 | 2006 | 2006 | Half Nelson                | Half Nelson                | Fleck, Ryan              | Ryan Fleck           | tt0468489  |
| 1746584972 | 1939 | 1939 | On Dress Parade            | On Dress Parade            | Clemens, William         | William Clemens      | tt0031012  |
| 1746409775 | 1991 | 1991 | Soapdish                   | Soapdish                   | Hoffman, Michael         | Michael Hoffman      | tt0102951  |
| 1746562031 | 1955 | 1955 | A Bullet for Joey          | A Bullet for Joey          | Allen, Lewis             | Lewis Allen          | tt0047904  |
| 1746513151 | 1917 | 1917 | Glory                      | Glory                      | Berri, Maud Lillian      | Francis J. Grandon   | tt0008015  |
| 1746476209 | 1947 | 1947 | Fun on a Weekend           | 'Fun on a Week End'        | Stone, Andrew            | Andrew L. Stone      | tt0039405  |
| 1746465235 | 1947 | 1947 | Rose of Santa Rosa         | Rose of Santa Rosa         | Nazarro, Ray             | Ray Nazarro          | tt0039786  |
| 1746532491 | 1916 | 1916 | The Code of Marcia Gray    | The Code of Marcia Gray    | Lloyd, Frank             | Frank Lloyd          | tt0006523  |
| 1746475909 | 1944 | 1944 | Harmony Trail              | Harmony Trail              | Emmett, Robert           | Robert Emmett Tansey | tt0039988  |
| 1746562023 | 1953 | 1953 | The Desert Rats            | The Desert Rats            | Wise, Robert             | Robert Wise          | tt0045679  |
| 1746408895 | 1987 | 1987 | House of Games             | House of Games             | Mamet, David             | David Mamet          | tt0093223  |
| 1746581781 | 1910 | 1910 | The Gold-Seekers           | The Gold Seekers           | Griffith, D. W.          | D.W. Griffith        | tt0001236  |
| 1746435258 | 1943 | 1943 | It's a Great Life          | It's a Great Life          | Strayer, Frank           | Frank R. Strayer     | tt0036049  |
| 1746580874 | 1936 | 1936 | The Unguarded Hour         | The Unguarded Hour         | Wood, Sam                | Sam Wood             | tt0028447  |
| 1746455685 | 1997 | 1997 | Anaconda                   | Anaconda                   | Llosa, Luis              | Luis Llosa           | tt0118615  |
| 1746491974 | 1948 | 1948 | Adventures in Silverado    | Adventures in Silverado    | Karlson, Phil            | Phil Karlson         | tt0040074  |
| 1746577198 | 1959 | 1959 | Ghost of Dragstrip Hollow  | Ghost of Dragstrip Hollow  | Hole, William            | William J. Hole Jr.  | tt0052844  |
| 1746583148 | 1938 | 1938 | Algiers                    | Algiers                    | Cromwell, John           | John Cromwell        | tt0029855  |
| 1746473684 | 1947 | 1947 | Life with Father           | Life with Father           | Curtiz, Michael          | Michael Curtiz       | tt0039566  |
| 1746514616 | 1923 | 1923 | \$1,000 Reward             | \$1,000 Reward             | Seeling, Charles R.      | Charles R. Seeling   | tt0013811  |
| 1745342007 | 2010 | 2010 | The Twilight Saga: Eclipse | The Twilight Saga: Eclipse | Slade, David             | David Slade          | tt1325004  |
| 1746582399 | 1929 | 1929 | Square Shoulders           | Square Shoulders           | Hopper, E. Mason         | E. Mason Hopper      | tt0126075  |
| 1746562154 | 1953 | 1953 | Flame of Calcutta          | Flame of Calcutta          | Friedman, Seymour        | Seymour Friedman     | tt0045771  |
| 1746585118 | 1928 | 1928 | The Grip of the Yukon      | The Grip of the Yukon      | Laemmle, Ernst           | Ernst Laemmle        | tt0018960  |
| 1746409441 | 1988 | 1988 | A Fish Called Wanda        | A Fish Called Wanda        | Crichton, Charles        | Charles Crichton     | tt0095159  |
| 1746561935 | 1954 | 1954 | His Majesty O'Keefe        | His Majesty O'Keefe        | Haskin, Byron            | Byron Haskin         | tt0045876  |

|                   |             |             |                                                 |                                             |                         |                        |                  |
|-------------------|-------------|-------------|-------------------------------------------------|---------------------------------------------|-------------------------|------------------------|------------------|
| 1746580642        | 1936        | 1936        | Flying Hostess                                  | Flying Hostess                              | Roth, Murray            | Murray Roth            | tt0027628        |
| 1746570073        | 1934        | 1934        | Moulin Rouge                                    | Moulin Rouge                                | Lanfield, Sidney        | Sidney Lanfield        | tt0025520        |
| 1746577523        | 1936        | 1936        | Gold Diggers of 1937                            | Gold Diggers of 1937                        | Bacon, Lloyd            | Lloyd Bacon            | tt0027686        |
| 1746514697        | 1923        | 1923        | Money Money Money                               | Money! Money! Money!                        | Forman, Tom             | Tom Forman             | tt0138625        |
| 1746580313        | 1937        | 1937        | Law for Tombstone                               | Law for Tombstone                           | Jones, Charles "Buck"   | W.B. Eason             | tt0029123        |
| 1746581899        | 1928        | 1928        | Say It With Sables                              | Say It with Sables                          | Capra, Frank            | Frank Capra            | tt0019355        |
| 1746454848        | 1941        | 1941        | The Case of the Black Parrot                    | The Case of the Black Parrot                | Smith, Noel M.          | Noel M. Smith          | tt0033452        |
| 1746580567        | 1935        | 1935        | Dizzy Dames                                     | Dizzy Dames                                 | Nigh, William           | William Nigh           | tt0026282        |
| 1746394146        | 1982        | 1982        | Honkytonk Man                                   | Honkytonk Man                               | Eastwood, Clint         | Clint Eastwood         | tt0084088        |
| 1769970644        | 1968        | 1968        | A Sweet Sickness                                | A Sweet Sickness                            | Martin, Jon             | Jon Martin             | tt0128666        |
| 1746235663        | 1981        | 1980        | Gloria                                          | Gloria                                      | Cassavetes, John        | John Cassavetes        | tt0080798        |
| 1746500613        | 1949        | 1949        | A Kiss for Corliss                              | A Kiss for Corliss                          | Wallace, Richard        | Richard Wallace        | tt0041549        |
| 1746585014        | 1940        | 1940        | One Night in the Tropics                        | One Night in the Tropics                    | Sutherland, A. Edward   | A. Edward Sutherland   | tt0032873        |
| 1746508101        | 1926        | 1926        | The Passaic Textile Strike                      | The Passaic Textile Strike                  |                         | Samuel Russak          | tt0455674        |
| 1769969439        | 1964        | 1963        | The Fat Black Pussycat                          | The Fat Black Pussycat                      | Lea, Harold             | Harold Lea             | tt0058090        |
| 1746585150        | 1929        | 1929        | Smoke Bellew                                    | Smoke Bellew                                | Dunlap, Scott           | Scott R. Dunlap        | tt0020423        |
| 1746584278        | 1935        | 1935        | The Rider of the Law                            | The Rider of the Law                        | Bradbury, Robert N.     | Robert N. Bradbury     | tt0026929        |
| 1746569856        | 1957        | 1957        | Slander                                         | Slander                                     | Rowland, Roy            | Roy Rowland            | tt0049767        |
| 1746520958        | 1949        | 1949        | She Wore a Yellow Ribbon                        | She Wore a Yellow Ribbon                    | Ford, John              | John Ford              | tt0041866        |
| 1746423996        | 1941        | 1941        | Too Many Blondes                                | Too Many Blondes                            | Freeland, Thornton      | Thornton Freeland      | tt0034301        |
| 1745357906        | 2004        | 2004        | Fat Albert                                      | Fat Albert                                  | Zwick, Joel             | Joel Zwick             | tt0396592        |
| 1746409077        | 1985        | 1984        | Kaddish                                         | Kaddish                                     | Brand, Steve            | Steve Brand            | tt0162419        |
| 1746420741        | 1983        | 1983        | Without a Trace                                 | Without a Trace                             | Jaffe, Stanley R.       | Stanley R. Jaffe       | tt0086593        |
| 1746484699        | 1917        | 1917        | Nearly Married                                  | Nearly Married                              | Withey, Chester         | Chester Withey         | tt0008365        |
| 1746570011        | 1961        | 1961        | Sniper's Ridge                                  | Sniper's Ridge                              | Bushelman, John         | John A. Bushelman      | tt0055457        |
| 1746422914        | 1991        | 1991        | L. A. Story                                     | L.A. Story                                  | Jackson, Mick           | Mick Jackson           | tt0102250        |
| 1745294020        | 2007        | 2007        | P.S. I Love You                                 | P.S. I Love You                             | LaGravenese, Richard    | Richard LaGravenese    | tt0431308        |
| 1746568222        | 1953        | 1953        | Peek-A-Boo                                      | Peek a Boo                                  | Hunt, Lillian           | Lillian Hunt           | tt0174109        |
| 1746438182        | 1940        | 1940        | Sandy Is a Lady                                 | Sandy Is a Lady                             | Lamont, Charles         | Charles Lamont         | tt0033019        |
| 1746199485        | 1968        | 1968        | Did You Hear the One About the Traveling Salesl | Did You Hear the One About the Traveling Sa | Weis, Don               | Don Weis               | tt0062890        |
| 1746577616        | 1935        | 1935        | Let 'Em Have It                                 | Let 'em Have It                             | Wood, Sam               | Sam Wood               | tt0026621        |
| 1746556045        | 1955        | 1955        | Top Gun                                         | Top Gun                                     | Nazarro, Ray            | Ray Nazarro            | tt0048734        |
| 1746501120        | 1922        | 1922        | The Devil's Ghost                               | The Devil's Ghost                           |                         | Charles W. Mack        | tt0356531        |
| 1746218393        | 1966        | 1966        | Jesse James Meets Frankenstein's Daughter       | Jesse James Meets Frankenstein's Daughter   | Beaudine, William       | William Beaudine       | tt0060558        |
| 1746570071        | 1933        | 1933        | The Fatal Glass of Beer                         | The Fatal Glass of Beer                     | Bruckman, Clyde         | Clyde Bruckman         | tt0022883        |
| 1746520853        | 1948        | 1948        | The Three Musketeers                            | The Three Musketeers                        | Sidney, George          | George Sidney          | tt0040876        |
| 1746409478        | 1991        | 1991        | Fried Green Tomatoes                            | Fried Green Tomatoes                        | Avnet, Jon              | Jon Avnet              | tt0101921        |
| 1746578767        | 1962        | 1962        | It Happened in Athens                           | It Happened in Athens                       | Marton, Andrew          | Andrew Marton          | tt0056109        |
| 1746420521        | 1991        | 1991        | Class Action                                    | Class Action                                | Apted, Michael          | Michael Apted          | tt0101590        |
| 1746520681        | 1950        | 1950        | Convicted                                       | Convicted                                   | Levin, Henry            | Henry Levin            | tt0042343        |
| 1746218878        | 1972        | 1972        | Jeremiah Johnson                                | Jeremiah Johnson                            | Pollack, Sydney         | Sydney Pollack         | tt0068762        |
| 1746465125        | 1947        | 1947        | Undercover Maisie                               | Undercover Maisie                           | Beaumont, Harry         | Harry Beaumont         | tt0039935        |
| 1746455185        | 2000        | 2000        | Bittersweet Motel                               | Bittersweet Motel                           | Phillips, Todd          | Todd Phillips          | tt0168515        |
| 1746566832        | 1933        | 1933        | Racetrack                                       | Racetrack                                   | Cruze, James            | James Cruze            | tt0024482        |
| 1745372469        | 2010        | 2010        | Prince of Persia: The Sands of Time             | Prince of Persia: The Sands of Time         | Newell, Mike            | Mike Newell            | tt0473075        |
| 1746583124        | 1935        | 1935        | Sweet Surrender                                 | Sweet Surrender                             | Brice, Monte            | Monte Brice            | tt0027065        |
| 1746423026        | 1998        | 1997        | Courting Courtney                               | Courting Courtney                           | Tarantino, Paul         | Paul Tarantino         | tt0118893        |
| 1746585044        | 1939        | 1939        | Wife, Husband and Friend                        | Wife, Husband and Friend                    | Ratoff, Gregory         | Gregory Ratoff         | tt0032128        |
| 1746574988        | 1937        | 1937        | Santa Fe Rides                                  | Santa Fe Rides                              | Shamray, Franklin       | Bernard B. Ray         | tt0232581        |
| 1746524543        | 1922        | 1922        | Grand Larceny                                   | Grand Larceny                               | Worsley, Wallace        | Wallace Worsley        | tt0013200        |
| 1746454708        | 1999        | 1999        | Get Bruce!                                      | Get Bruce                                   | Kuehn, Andrew J.        | Andrew J. Kuehn        | tt0184510        |
| 1746520426        | 1924        | 1924        | The Border Legion                               | The Border Legion                           | Howard, William K.      | William K. Howard      | tt0014728        |
| 1746582168        | 1931        | 1931        | Dancing Dynamite                                | Dancing Dynamite                            | Mason, Noel             | Noel M. Smith          | tt0021779        |
| 1746453630        | 1943        | 1943        | Here Comes Elmer                                | Here Comes Elmer                            | Santley, Joseph         | Joseph Santley         | tt0035987        |
| 1746261188        | 1979        | 1979        | A Perfect Couple                                | A Perfect Couple                            | Altman, Robert          | Robert Altman          | tt0079710        |
| <b>1746454360</b> | <b>1941</b> | <b>1941</b> | <b>King of Dodge City</b>                       | <b>King of Dodge City</b>                   | <b>Hillyer, Lambert</b> | <b>Lambert Hillyer</b> | <b>tt0033785</b> |
| 1746576829        | 1910        | 1910        | For the Love of Red Wing                        | For the Love of Red Wing                    |                         | Fred J. Balshofer      | tt0359288        |

|            |      |      |                           |                           |                                   |                       |           |
|------------|------|------|---------------------------|---------------------------|-----------------------------------|-----------------------|-----------|
| 1746562377 | 1953 | 1953 | The Naked Spur            | The Naked Spur            | Mann, Anthony                     | Anthony Mann          | tt0044953 |
| 1769971108 | 1969 | 1969 | All the Loving Couples    | All the Loving Couples    | Bing, Mack                        | Mack Bing             | tt0064003 |
| 1746514932 | 1928 | 1928 | Marked Money              | Marked Money              | Bennett, Spencer Gordon           | Spencer Gordon Bennet | tt0019144 |
| 1746501093 | 1915 | 1915 | The Bludgeon              | The Bludgeon              | Cullison, Webster                 | Webster Cullison      | tt0004982 |
| 1746421274 | 1994 | 1994 | The Air Up There          | The Air Up There          | Glaser, Paul M.                   | Paul Michael Glaser   | tt0109067 |
| 1746508092 | 1924 | 1924 | Wine of Youth             | Wine of Youth             | Vidor, King                       | King Vidor            | tt0015500 |
| 1746584572 | 1931 | 1931 | Women Men Marry           | Women Men Marry           | Hutchison, Charles                | Charles Hutchison     | tt0022575 |
| 1746475525 | 1946 | 1946 | Centennial Summer         | Centennial Summer         | Preminger, Otto                   | Otto Preminger        | tt0038406 |
| 1746184321 | 1965 | 1964 | Quick, Before It Melts    | Quick Before It Melts     | Mann, Delbert                     | Delbert Mann          | tt0058506 |
| 1746487576 | 1918 | 1918 | Set Free                  | Set Free                  | Browning, Tod                     | Tod Browning          | tt0010682 |
| 1746500829 | 1910 | 1910 | May and December          | May and December          | Powell, Frank                     | Frank Powell          | tt0001310 |
| 1746198019 | 1966 | 1966 | Cast a Giant Shadow       | Cast a Giant Shadow       | Shavelson, Melville               | Melville Shavelson    | tt0060218 |
| 1746580501 | 1938 | 1938 | Five of a Kind            | Five of a Kind            | Leeds, Herbert I.                 | Herbert I. Leeds      | tt0030136 |
| 1746219609 | 1974 | 1974 | The Super Cops            | The Super Cops            | Parks, Gordon                     | Gordon Parks          | tt0072228 |
| 1746491896 | 1946 | 1946 | Gilda                     | Gilda                     | Vidor, Charles                    | Charles Vidor         | tt0038559 |
| 1746211094 | 1973 | 1973 | Emperor of the North      | Emperor of the North      | Aldrich, Robert                   | Robert Aldrich        | tt0070030 |
| 1746454058 | 1944 | 1944 | The Doughgirls            | The Doughgirls            | Kern, James V.                    | James V. Kern         | tt0036776 |
| 1746533046 | 1923 | 1923 | Under the Red Robe        | Under the Red Robe        | Crosland, Alan                    | Alan Crosland         | tt0014568 |
| 1746408918 | 1985 | 1985 | Cocoon                    | Cocoon                    | Howard, Ron                       | Ron Howard            | tt0088933 |
| 1746580784 | 1939 | 1939 | Balalaika                 | Balalaika                 | Schunzel, Reinhold                | Reinhold Schünzel     | tt0031074 |
| 1746508506 | 1926 | 1926 | Faithful Wives            | Faithful Wives            | Myles, Norbert                    | Norbert A. Myles      | tt0016837 |
| 1746583075 | 1935 | 1935 | Thunder Mountain          | Thunder Mountain          | Howard, David                     | David Howard          | tt0027104 |
| 1746513082 | 1923 | 1923 | The Dangerous Age         | The Dangerous Age         | Stahl, John M.                    | John M. Stahl         | tt0013969 |
| 1746486507 | 1918 | 1918 | In Bad                    | In Bad                    | Sloman, Edward                    | Edward Sloman         | tt0012602 |
| 1746409507 | 1990 | 1990 | Marked for Death          | Marked for Death          | Little, Dwight H.                 | Dwight H. Little      | tt0100114 |
| 1746520870 | 1925 | 1925 | Ridin' Thunder            | Ridin' Thunder            | Smith, Clifford S.                | Clifford Smith        | tt0016291 |
| 1746435849 | 1999 | 1999 | Joe the King              | Joe the King              | Whaley, Frank                     | Frank Whaley          | tt0160672 |
| 1746573393 | 1932 | 1932 | Evenings for Sale         | Evenings for Sale         | Walker, Stuart                    | Stuart Walker         | tt0022863 |
| 1769976712 | 1929 | 1929 | Mexicana                  | Mexicana                  | Edwards, Gus                      | Gus Edwards           | tt0370959 |
| 1746491792 | 1948 | 1948 | The Denver Kid            | The Denver Kid            | Ford, Philip                      | Philip Ford           | tt0040282 |
| 1746409440 | 1981 | 1981 | So Fine                   | So Fine                   | Bergman, Andrew                   | Andrew Bergman        | tt0083099 |
| 1746577017 | 1951 | 1951 | Sealed Cargo              | Sealed Cargo              | Werker, Alfred                    | Alfred L. Werker      | tt0044012 |
| 1745342928 | 2002 | 2002 | Pumpkin                   | Pumpkin                   | Broder, Adam Larson; Abrams, Tony | Anthony Abrams        | tt0265591 |
| 1769971896 | 1970 | 1970 | The Dark Side of Tomorrow | The Dark Side of Tomorrow | Peeters, Barbara; Deerson, Jacque | Jack Deerson          | tt0070257 |
| 1746216698 | 1967 | 1967 | The War Wagon             | The War Wagon             | Kennedy, Burt                     | Burt Kennedy          | tt0062472 |
| 1746584847 | 1928 | 1928 | Headin' for Danger        | Headin' for Danger        | Bradbury, Robert North            | Robert N. Bradbury    | tt0018983 |
| 1746583764 | 1931 | 1931 | Good Sport                | Good Sport                | MacKenna, Kenneth                 | Kenneth MacKenna      | tt0021922 |
| 1746580264 | 1936 | 1936 | Florida Special           | Florida Special           | Murphy, Ralph                     | Ralph Murphy          | tt0027627 |
| 1746464850 | 1942 | 1942 | Lure of the Islands       | Lure of the Islands       | Yarbrough, Jean                   | Jean Yarbrough        | tt0035002 |
| 1745303055 | 2007 | 2007 | Who's Your Caddy?         | Who's Your Caddy?         | Paul, Don Michael                 | Don Michael Paul      | tt0785077 |
| 1746508375 | 1926 | 1926 | Fighting Ranger           | The Fighting Ranger       | Hurst, Paul                       | Paul Hurst            | tt0016866 |
| 1746498293 | 1919 | 1919 | The Little Diplomat       | The Little Diplomat       | Paton, Stuart                     | Stuart Paton          | tt0010369 |
| 1746514836 | 1915 | 1915 | Evidence                  | Evidence                  | August, Edwin                     | Edwin August          | tt0005256 |
| 1746570288 | 1934 | 1934 | Handy Andy                | Handy Andy                | Butler, David                     | David Butler          | tt0025217 |
| 1746484702 | 1918 | 1918 | The Sins of the Children  | The Sins of the Children  | Lopez, John S.                    | John S. Lopez         | tt0187510 |
| 1746582255 | 1950 | 1950 | Winchester '73            | Winchester '73            | Mann, Anthony                     | Anthony Mann          | tt0043137 |
| 1746483901 | 1917 | 1917 | Little Miss Fortune       | Little Miss Fortune       | Levering, Joseph                  | Joseph Levering       | tt0176939 |
| 1746409251 | 1985 | 1985 | Creature                  | Creature                  | Malone, William                   | William Malone        | tt0088961 |
| 1746198497 | 1969 | 1969 | Fly Now, Pay Later        | Fly Now, Pay Later        | Dial, B. H.                       | B.H. Dial             | tt0137536 |
| 1746250738 | 1979 | 1979 | ...And Justice for All    | ...and justice for all.   | Jewison, Norman                   | Norman Jewison        | tt0078718 |
| 1746581682 | 1928 | 1928 | The Rustler's End         | The Rustler's End         | Horner, Robert J.                 | Robert J. Horner      | tt0159712 |
| 1746437415 | 1940 | 1940 | Slightly Tempted          | Slightly Tempted          | Landers, Lew                      | Lew Landers           | tt0033063 |
| 1746575013 | 1937 | 1937 | The Trusted Outlaw        | The Trusted Outlaw        | Bradbury, Robert N.               | Robert N. Bradbury    | tt0029696 |
| 1746570004 | 1958 | 1958 | The Defiant Ones          | The Defiant Ones          | Kramer, Stanley                   | Stanley Kramer        | tt0051525 |
| 1746410384 | 1980 | 1980 | The Private Eyes          | The Private Eyes          | Elliott, Lang                     | Lang Elliott          | tt0081376 |
| 1746422240 | 1998 | 1998 | A Simple Plan             | A Simple Plan             | Raimi, Sam                        | Sam Raimi             | tt0120324 |
| 1746584805 | 1930 | 1930 | Undertow                  | Undertow                  | Pollard, Harry                    | Harry A. Pollard      | tt0021504 |

|            |      |      |                                    |                                    |                             |                       |           |
|------------|------|------|------------------------------------|------------------------------------|-----------------------------|-----------------------|-----------|
| 1746455201 | 1998 | 1998 | The Cruise                         | The Cruise                         | Miller, Bennett             | Bennett Miller        | tt0150230 |
| 1746524371 | 1910 | 1910 | The Roman                          | The Roman                          | Boggs, Frank                | Francis Boggs         | tt0000751 |
| 1746566186 | 1956 | 1956 | Storm Center                       | Storm Center                       | Taradash, Daniel            | Daniel Taradash       | tt0049800 |
| 1746423690 | 1940 | 1940 | Pony Post                          | Pony Post                          | Taylor, Ray                 | Ray Taylor            | tt0032923 |
| 1746582775 | 1938 | 1938 | Hunted Men                         | Hunted Men                         | King, Louis                 | Louis King            | tt0030251 |
| 1746523856 | 1916 | 1916 | The Stolen Triumph                 | The Stolen Triumph                 | Thompson, David             | David Thompson        | tt0158993 |
| 1746553868 | 1963 | 1963 | Cry of Battle                      | Cry of Battle                      | Lerner, Irving              | Irving Lerner         | tt0056967 |
| 1746508226 | 1924 | 1924 | Payable on Demand                  | Payable on Demand                  | Maloney, Leo                | Leo D. Maloney        | tt0147156 |
| 1746453742 | 1996 | 1996 | Fear                               | Fear                               | Foley, James                | James Foley           | tt0116287 |
| 1745372527 | 2002 | 2002 | Changing Lanes                     | Changing Lanes                     | Michell, Roger              | Roger Michell         | tt0264472 |
| 1745293931 | 2007 | 2007 | 1408                               | 1408                               | Hafstrom, Mikael            | Mikael Häfström       | tt0450385 |
| 1746233012 | 1969 | 1969 | The Hanging of Jake Ellis          | The Hanging of Jake Ellis          | Van Hearn, J.               | Jean Van Hearn        | tt0218322 |
| 1746509255 | 1949 | 1949 | The Gal Who Took the West          | The Gal Who Took the West          | De Cordova, Frederick       | Frederick De Cordova  | tt0041400 |
| 1746565290 | 1932 | 1932 | Racing Youth                       | Racing Youth                       | Moore, Vin                  | Vin Moore             | tt0024483 |
| 1746436354 | 1941 | 1941 | The Texas Marshal                  | The Texas Marshal                  | Stewart, Peter              | Sam Newfield          | tt0034270 |
| 1746497646 | 1917 | 1917 | The Lady in the Library            | The Lady in the Library            | Jones, Edgar                | Edgar Jones           | tt0117484 |
| 1746584242 | 1939 | 1939 | Riders of the Frontier             | Riders of the Frontier             | Bennett, Spencer Gordon     | Spencer Gordon Bennet | tt0031860 |
| 1746218987 | 1972 | 1972 | Play It As It Lays                 | Play It As It Lays                 | Perry, Frank                | Frank Perry           | tt0069098 |
| 1746566109 | 1956 | 1956 | Invasion of the Body Snatchers     | Invasion of the Body Snatchers     | Siegel, Don                 | Don Siegel            | tt0049366 |
| 1746408913 | 1989 | 1989 | The Terror Within                  | The Terror Within                  | Notz, Thierry               | Thierry Notz          | tt0096246 |
| 1746483510 | 1917 | 1917 | The Checkmate                      | Checkmate                          | McDonald, Sherwood          | Edward LeSaint        | tt4830120 |
| 1746577467 | 1951 | 1951 | My Favorite Spy                    | My Favorite Spy                    | McLeod, Norman Z.           | Norman Z. McLeod      | tt0043827 |
| 1746582190 | 1950 | 1949 | A French Peep Show                 | The French Peep Show               | Alexander, William          | Russ Meyer            | tt0347025 |
| 1746575366 | 1910 | 1910 | The Flight of Red Wing             | The Flight of Red Wing             |                             | Fred J. Balshofer     | tt0359282 |
| 1746578866 | 1963 | 1963 | Dime With a Halo                   | Dime with a Halo                   | Sagal, Boris                | Boris Sagal           | tt0056999 |
| 1746424006 | 1942 | 1942 | Sing Your Worries Away             | Sing Your Worries Away             | Sutherland, A. Edward       | A. Edward Sutherland  | tt0035338 |
| 1746584751 | 1928 | 1927 | The Gaucho                         | The Gaucho                         | Jones, F. Richard           | F. Richard Jones      | tt0017918 |
| 1746199026 | 1966 | 1966 | Texas Across the River             | Texas Across the River             | Gordon, Michael             | Michael Gordon        | tt0061080 |
| 1746584361 | 1937 | 1937 | One Man Justice                    | One Man Justice                    | Barsha, Leon                | Leon Barsha           | tt0029348 |
| 1746574356 | 1960 | 1960 | The Adventures of Huckleberry Finn | The Adventures of Huckleberry Finn | Curtiz, Michael             | Michael Curtiz        | tt0053571 |
| 1769970494 | 1967 | 1967 | Strange Rampage                    | Strange Rampage                    | Volpe, Ignatius             | Harry Kerwin          | tt0062308 |
| 1746408512 | 1986 | 1986 | Vamp                               | Vamp                               | Wenk, Richard               | Richard Wenk          | tt0092147 |
| 1746474817 | 1946 | 1946 | The Verdict                        | The Verdict                        | Siegel, Don                 | Don Siegel            | tt0039080 |
| 1746523950 | 1916 | 1916 | The Devil-in-Chief                 | The Devil in Chief                 | Campbell, Colin             | Colin Campbell        | tt0441199 |
| 1746583751 | 1929 | 1929 | The Godless Girl                   | The Godless Girl                   | DeMille, Cecil B.           | Cecil B. DeMille      | tt0019935 |
| 1746585181 | 1928 | 1928 | A Woman Against the World          | A Woman Against the World          | Archainbaud, George         | George Archainbaud    | tt0019588 |
| 1746502808 | 1917 | 1917 | The Phantom Shotgun                | The Phantom Shotgun                | Harvey, Harry               | Harry Harvey          | tt0008428 |
| 1746566900 | 1932 | 1932 | The Big Timer                      | The Big Timer                      | Buzzell, Eddie              | Edward Buzzell        | tt0022682 |
| 1746532998 | 1927 | 1927 | The Girl From Gay Paree            | The Girl from Gay Paree            | Stone, Phil                 | Phil Goldstone        | tt0017933 |
| 1746465226 | 1946 | 1946 | High School Hero                   | High School Hero                   | Dreifuss, Arthur            | Arthur Dreifuss       | tt0038601 |
| 1746409039 | 1982 | 1982 | Annie                              | Annie                              | Huston, John                | John Huston           | tt0083564 |
| 1746580722 | 1936 | 1936 | Man Hunt                           | Man Hunt                           | Clemens, William            | William Clemens       | tt0027936 |
| 1746503015 | 1915 | 1915 | The Bondwomen                      | The Bondwoman                      | August, Edwin               | Kenean Buel           | tt1148237 |
| 1746584854 | 1930 | 1930 | Officer O'Brien                    | Officer O'Brien                    | Garnett, Tay                | Tay Garnett           | tt0021198 |
| 1746567951 | 1934 | 1934 | The World Moves On                 | The World Moves On                 | Ford, John                  | John Ford             | tt0026008 |
| 1746487357 | 1919 | 1919 | The Petal on the Current           | A Petal on the Current             | Browning, Tod               | Tod Browning          | tt0010561 |
| 1746580477 | 1935 | 1934 | The Tonto Kid                      | The Tonto Kid                      | Fraser, Harry               | Harry L. Fraser       | tt0131072 |
| 1746569935 | 1957 | 1957 | Raiders of Old California          | Raiders of Old California          | Gannaway, Albert C.         | Albert C. Gannaway    | tt0050879 |
| 1746410405 | 1989 | 1989 | Heavy Petting                      | Heavy Petting                      | Benz, Obie                  | Obie Benz             | tt0095289 |
| 1746555749 | 1957 | 1957 | A Face in the Crowd                | A Face in the Crowd                | Kazan, Elia                 | Elia Kazan            | tt0050371 |
| 1746474512 | 1944 | 1944 | Tunisian Victory                   | Tunisian Victory                   | Stewart, Hugh; Capra, Frank | Frank Capra           | tt0037404 |
| 1746475899 | 1945 | 1945 | The Crimson Canary                 | The Crimson Canary                 | Hoffman, John               | John Hoffman          | tt0037623 |
| 1746563645 | 1951 | 1951 | Yes Sir, Mr. Bones                 | Yes Sir, Mr. Bones                 | Ormond, Ron                 | Ron Ormond            | tt0044222 |
| 1746520698 | 1925 | 1925 | Ridin' Wild                        | Ridin' Wild                        | De La Mothe, Leon           | Leon De La Mothe      | tt0156959 |
| 1746554678 | 1964 | 1964 | Ride the Wild Surf                 | Ride the Wild Surf                 | Taylor, Don                 | Don Taylor            | tt0058523 |
| 1746491761 | 1944 | 1944 | Stars on Parade                    | Stars on Parade                    | Landers, Lew                | Lew Landers           | tt0037311 |
| 1746580425 | 1939 | 1939 | Fighting Thoroughbreds             | Fighting Thoroughbreds             | Salkow, Sidney              | Sidney Salkow         | tt0031307 |

|                   |             |             |                                   |                                   |                           |                       |                  |
|-------------------|-------------|-------------|-----------------------------------|-----------------------------------|---------------------------|-----------------------|------------------|
| 1746473745        | 1946        | 1946        | Easy to Wed                       | Easy to Wed                       | Buzzell, Edward           | Edward Buzzell        | tt0038505        |
| 1746509288        | 1925        | 1925        | Who's Your Friend                 | Who's Your Friend                 | Sheldon, Forrest K.       | Forrest Sheldon       | tt0179525        |
| 1746515288        | 1917        | 1917        | Blind Man's Holiday               | Blind Man's Holiday               | Justice, Martin           | Martin Justice        | tt0168520        |
| 1746487040        | 1918        | 1918        | Playthings                        | Playthings                        | Gerrard, Douglas          | Douglas Gerrard       | tt0009503        |
| 1746577979        | 1936        | 1936        | Three Married Men                 | Three Married Men                 | Buzzell, Edward           | Edward Buzzell        | tt0028369        |
| 1746578848        | 1959        | 1959        | Tarzan's Greatest Adventure       | Tarzan's Greatest Adventure       | Guillermin, John          | John Guillermin       | tt0053334        |
| 1745293205        | 2006        | 2006        | Running Scared                    | Running Scared                    | Kramer, Wayne             | Wayne Kramer          | tt0404390        |
| 1746577400        | 1950        | 1950        | Federal Man                       | Federal Man                       | Tansey, Robert            | Robert Emmett Tansey  | tt0176712        |
| 1746486523        | 1918        | 1918        | The Girl in the Dark              | The Girl in the Dark              | Paton, Stuart             | Stuart Paton          | tt0009113        |
| 1746574360        | 1959        | 1959        | The Killer Shrews                 | The Killer Shrews                 | Kellogg, Ray              | Ray Kellogg           | tt0052969        |
| 1746500410        | 1950        | 1950        | Joe Palooka in the Squared Circle | Joe Palooka in The Squared Circle | Le Borg, Reginald         | Reginald Le Borg      | tt0042617        |
| 1746583958        | 1931        | 1931        | The Fighting Marshal              | The Fighting Marshal              | Lederman, D. Ross         | D. Ross Lederman      | tt0022886        |
| 1746566002        | 1955        | 1955        | A Man Called Peter                | A Man Called Peter                | Koster, Henry             | Henry Koster          | tt0048337        |
| 1746409087        | 1986        | 1986        | Extremities                       | Extremities                       | Young, Robert M.          | Robert M. Young       | tt0091024        |
| 1746183898        | 1910        | 1910        | The Champion of the Race          | The Champion of the Race          |                           | Theodore Wharton      | tt1493240        |
| 1746438968        | 1942        | 1942        | Foreign Agent                     | Foreign Agent                     | Beaudine, William         | William Beaudine      | tt0034748        |
| 1746574577        | 1937        | 1937        | Double Wedding                    | Double Wedding                    | Thorpe, Richard           | Richard Thorpe        | tt0028804        |
| 1746465366        | 1943        | 1943        | You're a Lucky Fellow, Mr. Smith  | You're a Lucky Fellow, Mr. Smith  | Feist, Felix E.           | Felix E. Feist        | tt0036551        |
| 1746582228        | 1951        | 1951        | Roaring City                      | Roaring City                      | Berke, William            | William Berke         | tt0043975        |
| 1746572320        | 1932        | 1932        | Lovers Courageous                 | Lovers Courageous                 | Leonard, Robert Z.        | Robert Z. Leonard     | tt0023162        |
| 1746500500        | 1950        | 1950        | Edge of Doom                      | Edge of Doom                      | Robson, Mark              | Mark Robson           | tt0042428        |
| 1746437005        | 1943        | 1943        | Calling Wild Bill Elliott         | Calling Wild Bill Elliott         | Bennet, Spencer           | Spencer Gordon Bennet | tt0035707        |
| 1746485544        | 1918        | 1918        | Madame Spy                        | Madame Spy                        | Gerrard, Douglas          | Douglas Gerrard       | tt0009331        |
| 1746516536        | 1921        | 1921        | The White Masks                   | The White Masks                   | Holt, George              | George Holt           | tt0012841        |
| 1745272261        | 2000        | 2000        | Nurse Betty                       | Nurse Betty                       | LaBute, Neil              | Neil LaBute           | tt0171580        |
| 1746514848        | 1922        | 1922        | The Bonded Woman                  | The Bonded Woman                  | Rosen, Philip E.          | Phil Rosen            | tt0012960        |
| 1746585287        | 1928        | 1928        | The Circus Kid                    | The Circus Kid                    | Seitz, George B.          | George B. Seitz       | tt0018771        |
| 1746496317        | 1921        | 1921        | The Love Charm                    | The Love Charm                    | Heffron, Thomas N.        | Thomas N. Heffron     | tt0012407        |
| 1746512870        | 1917        | 1917        | The Greatest Power                | The Greatest Power                | Carewe, Edwin             | Edwin Carewe          | tt0008033        |
| 1746584701        | 1928        | 1928        | Dugan of the Dugouts              | Dugan of the Dugouts              | Ray, Robert               | Bobby Ray             | tt0130642        |
| 1746569823        | 1958        | 1958        | The Last of the Fast Guns         | The Last of the Fast Guns         | Sherman, George           | George Sherman        | tt0051846        |
| 1746435362        | 1999        | 1999        | American Pie                      | American Pie                      | Weitz, Paul               | Paul Weitz            | tt0163651        |
| 1746420387        | 1993        | 1993        | Sniper                            | Sniper                            | Llosa, Luis               | Luis Llosa            | tt0108171        |
| 1746570418        | 1952        | 1952        | The Miracle of Our Lady of Fatima | The Miracle of Our Lady of Fatima | Brahm, John               | John Brahm            | tt0044905        |
| 1746509233        | 1924        | 1924        | Western Yesterdays                | Western Yesterdays                | Ford, Francis             | Francis Ford          | tt0177391        |
| 1746475024        | 1943        | 1943        | Black Market Rustlers             | Black Market Rustlers             | Luby, S. Roy              | S. Roy Luby           | tt0035678        |
| 1746504093        | 1918        | 1918        | Loaded Dice                       | Loaded Dice                       | Blaché, Herbert           | Herbert Blaché        | tt0009312        |
| 1746524377        | 1915        | 1915        | Matrimony                         | Matrimony                         | Sidney, Scott             | Scott Sidney          | tt0005730        |
| 1745282892        | 2006        | 2006        | Clerks II                         | Clerks II                         | Smith, Kevin              | Kevin Smith           | tt0424345        |
| 1746503774        | 1919        | 1919        | The Girl from Nowhere             | Girl from Nowhere                 | Lucas, Wilfred            | Wilfred Lucas         | tt0010168        |
| 1746499888        | 1946        | 1946        | Alias Billy the Kid               | Alias Billy the Kid               | Carr, Thomas              | Thomas Carr           | tt0038294        |
| 1745359145        | 2002        | 2001        | Revolution OS                     | Revolution OS                     | Moore, J. T. S.           | J. T. S. Moore        | tt0308808        |
| 1746520768        | 1950        | 1950        | Destination Big House             | Destination Big House             | Blair, George             | George Blair          | tt0042392        |
| 1746566647        | 1952        | 1952        | Tropical Heat Wave                | Tropical Heat Wave                | Springsteen, R. G.        | R.G. Springsteen      | tt0045263        |
| 1745342628        | 2003        | 2002        | The Weather Underground           | The Weather Underground           | Green, Sam ; Siegel, Bill | Sam Green             | tt0343168        |
| 1746503551        | 1919        | 1919        | The Bondage of Barbara            | The Bondage of Barbara            | Flynn, Emmett J.          | Emmett J. Flynn       | tt0009951        |
| <b>1746520813</b> | <b>1925</b> | <b>1925</b> | <b>The Pony Express</b>           | <b>The Pony Express</b>           | <b>Cruze, James</b>       | <b>James Cruze</b>    | <b>tt0016235</b> |
| 1746474117        | 1946        | 1946        | Black Angel                       | Black Angel                       | Neill, Roy William        | Roy William Neill     | tt0038360        |
| 1746555077        | 1954        | 1954        | Elephant Walk                     | Elephant Walk                     | Dieterle, William         | William Dieterle      | tt0046951        |
| 1746580384        | 1938        | 1938        | Partners of the Plains            | Partners of the Plains            | Selander, Lesley          | Lesley Selander       | tt0030558        |
| 1769970551        | 1967        | 1967        | Mr. Mari's Girls                  | Mr. Mari's Girls                  | Hennigar, William K.      | William K. Hennigar   | tt0126466        |
| 1746424398        | 1940        | 1940        | East of the River                 | East of the River                 | Green, Alfred E.          | Alfred E. Green       | tt0032429        |
| 1746453462        | 1942        | 1942        | Ghost Town Law                    | Ghost Town Law                    | Bretherton, Howard        | Howard Bretherton     | tt0034785        |
| 1746561487        | 1932        | 1932        | Lady and Gent                     | Lady and Gent                     | Roberts, Stephen          | Stephen Roberts       | tt0023109        |
| 1746520649        | 1949        | 1949        | Red Light                         | Red Light                         | Del Ruth, Roy             | Roy Del Ruth          | tt0041790        |
| 1746524943        | 1928        | 1928        | Love Over Night                   | Love Over Night                   | Griffith, Edward H.       | Edward H. Griffith    | tt0019114        |
| 1746453518        | 1944        | 1944        | Fuzzy Settles Down                | Fuzzy Settles Down                | Newfield, Sam             | Sam Newfield          | tt0036844        |

|                   |             |             |                                    |                                    |                                  |                       |                  |
|-------------------|-------------|-------------|------------------------------------|------------------------------------|----------------------------------|-----------------------|------------------|
| 1746474410        | 1947        | 1947        | The Chinese Ring                   | The Chinese Ring                   | Beaudine, William                | William Beaudine      | tt0039262        |
| 1746580257        | 1934        | 1934        | Men of the Night                   | Men of the Night                   | Hillyer, Lambert                 | Lambert Hillyer       | tt0025490        |
| 1745293601        | 2006        | 2006        | Cowboy Junction                    | Cowboy Junction                    | Christian, Gregory               | Gregory Christian     | tt0816145        |
| 1746502928        | 1914        | 1914        | The Mountain Rat                   | The Mountain Rat                   | Kirkwood, James                  | James Kirkwood        | tt0004359        |
| 1746525165        | 1920        | 1920        | Married Life                       | Married Life                       | Sennett, Mack                    | Erle C. Kenton        | tt0011444        |
| 1746500186        | 1924        | 1924        | Captain January                    | Captain January                    | Cline, Edward F.                 | Edward F. Cline       | tt0014760        |
| 1745272114        | 2000        | 2000        | Supernova                          | Supernova                          | Lee, Thomas                      | Walter Hill           | tt0134983        |
| 1746532501        | 1923        | 1923        | Shadows of the North               | Shadows of the North               | Hill, Robert F.                  | Robert F. Hill        | tt0014461        |
| 1746578429        | 1963        | 1963        | House of the Damned                | House of the Damned                | Dexter, Maury                    | Maury Dexter          | tt0057160        |
| 1746454818        | 1942        | 1942        | Apache Trail                       | Apache Trail                       | Thorpe, Richard; Rosson, Richard | Richard Thorpe        | tt0035639        |
| 1746580614        | 1935        | 1935        | Village Tale                       | Village Tale                       | Cromwell, John                   | John Cromwell         | tt0027176        |
| 1746514853        | 1916        | 1916        | Betty of Graystone                 | Betty of Greystone                 | Dwan, Allan                      | Allan Dwan            | tt0006426        |
| 1746530736        | 1949        | 1949        | Black Midnight                     | Black Midnight                     | Boetticher, Oscar                | Budd Boetticher       | tt0041183        |
| 1746562347        | 1957        | 1957        | The Tijuana Story                  | The Tijuana Story                  | Kardos, Leslie                   | László Kardos         | tt0051081        |
| 1746416230        | 1917        | 1917        | The Jury of Fate                   | The Jury of Fate                   | Browning, Tod                    | Tod Browning          | tt0008155        |
| 1746554608        | 1964        | 1964        | The Secret Door                    | The Secret Door                    | Kay, Gilbert L.                  | Gilbert Kay           | tt0056459        |
| 1746585070        | 1930        | 1930        | Oh, For a Man                      | Oh, for a Man!                     | MacFadden, Hamilton              | Hamilton MacFadden    | tt0021199        |
| 1746492461        | 1946        | 1946        | Sister Kenny                       | Sister Kenny                       | Nichols, Dudley                  | Dudley Nichols        | tt0038948        |
| 1746583954        | 1930        | 1930        | Today                              | Today                              | Nigh, William                    | William Nigh          | tt0021480        |
| 1746573795        | 1956        | 1956        | You Can't Run Away from It         | You Can't Run Away from It         | Powell, Dick                     | Dick Powell           | tt0049973        |
| 1769969925        | 1911        | 1911        | Only an Iceman                     | Only an Iceman                     |                                  |                       | tt1303886        |
| 1746438163        | 1997        | 1997        | For Richer or Poorer               | For Richer or Poorer               | Spicer, Bryan                    | Bryan Spicer          | tt0119142        |
| 1746520817        | 1948        | 1948        | Trapped by Boston Blackie          | Trapped by Boston Blackie          | Friedman, Seymour                | Seymour Friedman      | tt0040896        |
| 1746498487        | 1918        | 1918        | The Eagle                          | The Eagle                          | Clifton, Elmer                   | Elmer Clifton         | tt0009030        |
| 1746507875        | 1926        | 1926        | Millionaires                       | Millionaires                       | Raymaker, Herman C.              | Herman C. Raymaker    | tt0017154        |
| 1746578633        | 1950        | 1950        | One Way Street                     | One Way Street                     | Fregonese, Hugo                  | Hugo Fregonese        | tt0042809        |
| 1746584201        | 1936        | 1936        | Banjo on My Knee                   | Banjo on My Knee                   | Cromwell, John                   | John Cromwell         | tt0027331        |
| 1746584435        | 1931        | 1931        | The Star Witness                   | The Star Witness                   | Wellman, William A.              | William A. Wellman    | tt0022430        |
| 1746200219        | 1969        | 1969        | Justine                            | Justine                            | Cukor, George                    | George Cukor          | tt0064526        |
| 1746500341        | 1925        | 1925        | Romance and Rustlers               | Romance and Rustlers               | Wilson, Ben                      | Ben F. Wilson         | tt0127765        |
| 1746248350        | 1966        | 1966        | The Last of the Secret Agents?     | The Last of the Secret Agents?     | Abbott, Norman                   | Norman Abbott         | tt0060619        |
| 1746577802        | 1935        | 1935        | Danger Ahead                       | Danger Ahead                       | Herman, Al                       | Albert Herman         | tt0026259        |
| 1746515704        | 1918        | 1918        | Danger -Xxx Go Slow                | Danger, Go Slow                    | Leonard, Robert                  | Robert Z. Leonard     | tt0008993        |
| 1745272315        | 2000        | 2000        | Space Cowboys                      | Space Cowboys                      | Eastwood, Clint                  | Clint Eastwood        | tt0186566        |
| 1769970399        | 1966        | 1966        | The Devil's Sisters                | The Devil's Sisters                | Grefé, William                   | William Grefé         | tt0058008        |
| 1746577245        | 1963        | 1963        | The Man From Galveston             | The Man from Galveston             | Conrad, William                  | William Conrad        | tt0057283        |
| 1746508386        | 1925        | 1925        | Down Upon the Suwannee River       | Down Upon the Suwannee River       | Kennedy, Lem F.                  | Lem F. Kennedy        | tt0130635        |
| 1746233855        | 1968        | 1968        | Invitation to Ruin                 | Invitation to Ruin                 | Richter, Kurt                    | Kurt Richter          | tt0063138        |
| 1746235411        | 1971        | 1971        | There's Always Vanilla             | There's Always Vanilla             |                                  | George A. Romero      | tt0166843        |
| <b>1746566173</b> | <b>1956</b> | <b>1955</b> | <b>The Man with the Golden Arm</b> | <b>The Man with the Golden Arm</b> | <b>Preminger, Otto</b>           | <b>Otto Preminger</b> | <b>tt0048347</b> |
| 1746394452        | 1989        | 1989        | Mystery Train                      | Mystery Train                      | Jarmusch, Jim                    | Jim Jarmusch          | tt0097940        |
| 1746515055        | 1923        | 1923        | The Apache Dancer                  | The Apache Dancer                  | Seeling, Charles R.              | Charles R. Seeling    | tt0013836        |
| 1746491779        | 1946        | 1946        | Singing on the Trail               | Singing on the Trail               | Nazarro, Ray                     | Ray Nazarro           | tt0038945        |
| 1746475895        | 1946        | 1946        | Her Kind of Man                    | Her Kind of Man                    | Cordova, Frederick de            | Frederick De Cordova  | tt0038597        |
| 1746549972        | 1955        | 1955        | No Man's Woman                     | No Man's Woman                     | Adreon, Franklin                 | Franklin Adreon       | tt0048426        |
| 1746584072        | 1939        | 1939        | Here I Am a Stranger               | Here I Am a Stranger               | Del Ruth, Roy; Seiter, William   | Roy Del Ruth          | tt0031418        |
| 1746473941        | 1947        | 1947        | Blondie's Holiday                  | Blondie's Holiday                  | Berlin, Abby                     | Abby Berlin           | tt0039203        |
| 1746198880        | 1966        | 1966        | The Alley Cats                     | The Alley Cats                     | Metzger, Radley H.               | Radley Metzger        | tt0064006        |
| 1746584031        | 1938        | 1938        | Man's Paradise                     | Man's Paradise                     | Shamroy, Leon                    | Leon Shamroy          | tt0151481        |
| 1769970533        | 1934        | 1934        | The Camera Speaks                  | The Camera Speaks                  |                                  |                       | tt1280500        |
| 1746569517        | 1957        | 1957        | Pawnee                             | Pawnee                             | Waggner, George                  | George Waggner        | tt0050827        |
| 1746467429        | 1917        | 1917        | It Happened to Adele               | It Happened to Adele               | Brooke, Van Dyke                 | Van Dyke Brooke       | tt0176858        |
| 1746419612        | 1982        | 1982        | Forty Deuce                        | Forty Deuce                        | Morrissey, Paul                  | Paul Morrissey        | tt0083962        |
| 1746578016        | 1938        | 1938        | Prison Train                       | Prison Train                       | Wiles, Gordon                    | Gordon Wiles          | tt0030628        |
| 1745373972        | 2009        | 2009        | Did You Hear About the Morgans?    | Did You Hear About the Morgans?    | Lawrence, Marc                   | Marc Lawrence         | tt1314228        |
| 1746420389        | 1992        | 1992        | The Public Eye                     | The Public Eye                     | Franklin, Howard                 | Howard Franklin       | tt0105187        |
| 1746436633        | 1940        | 1940        | The Sagebrush Family Trails West   | The Sagebrush Family Trails West   | Stewart, Peter                   | Sam Newfield          | tt0033010        |

|                   |             |             |                              |                              |                        |                       |                  |
|-------------------|-------------|-------------|------------------------------|------------------------------|------------------------|-----------------------|------------------|
| 1746568362        | 1933        | 1933        | The World Gone Mad           | The World Gone Mad           | Cabanne, Christy       | Christy Cabanne       | tt0024787        |
| 1746199547        | 1969        | 1969        | Angel in My Pocket           | Angel in My Pocket           | Rafkin, Alan           | Alan Rafkin           | tt0064026        |
| 1745373704        | 2008        | 2008        | Cadillac Records             | Cadillac Records             | Martin, Darnell        | Darnell Martin        | tt1042877        |
| 1745357960        | 2003        | 2003        | It Runs in the Family        | It Runs in the Family        | Schepisi, Fred         | Fred Schepisi         | tt0311110        |
| 1746578573        | 1959        | 1959        | Lone Texan                   | Lone Texan                   | Landres, Paul          | Paul Landres          | tt0053016        |
| 1746513864        | 1916        | 1916        | The Buried Treasure of Cobre | The Buried Treasure of Cobre | Beal, Frank            | Frank Beal            | tt0421897        |
| 1746453489        | 1942        | 1942        | Border Roundup               | Border Roundup               | Newfield, Sam          | Sam Newfield          | tt0034542        |
| 1746235752        | 1978        | 1978        | An Unmarried Woman           | An Unmarried Woman           | Mazursky, Paul         | Paul Mazursky         | tt0078444        |
| 1746271929        | 1965        | 1965        | Boeing, Boeing               | Boeing, Boeing               | Rich, John             | John Rich             | tt0058981        |
| 1746504180        | 1921        | 1921        | You Find It Everywhere       | You Find It Everywhere       | Horan, Charles         | Charles Horan         | tt0012871        |
| 1746581432        | 1928        | 1928        | Trails of Treachery          | Trails of Treachery          | Horner, Robert J.      | Robert J. Horner      | tt0173351        |
| 1746532494        | 1914        | 1914        | Detective Craig's Coup       | Detective Craig's Coup       |                        | Donald MacKenzie      | tt0003830        |
| 1746565495        | 1952        | 1952        | The Maverick                 | The Maverick                 | Carr, Thomas           | Thomas Carr           | tt0044890        |
| 1746438925        | 1943        | 1943        | Girl Crazy                   | Girl Crazy                   | Taugog, Norman         | Norman Taugog         | tt0035942        |
| 1746500319        | 1926        | 1926        | The Little Irish Girl        | The Little Irish Girl        | Del Ruth, Roy          | Roy Del Ruth          | tt0017071        |
| 1746577973        | 1938        | 1938        | Joy of Living                | Joy of Living                | Garnett, Tay           | Tay Garnett           | tt0030293        |
| 1746491736        | 1948        | 1948        | Fighting Back                | Fighting Back                | St. Clair, Mal         | Malcolm St. Clair     | tt0040354        |
| 1746545084        | 1940        | 1940        | Friendly Neighbors           | Friendly Neighbors           | Grinde, Nick           | Nick Grinde           | tt0032495        |
| 1746436813        | 1990        | 1990        | Berkeley in the Sixties      | Berkeley in the Sixties      | Kitchell, Mark         | Mark Kitchell         | tt0099121        |
| 1746421326        | 1981        | 1981        | Dragonslayer                 | Dragonslayer                 | Robbins, Matthew       | Matthew Robbins       | tt0082288        |
| 1746474400        | 1948        | 1948        | Jungle Patrol                | Jungle Patrol                | Newman, Joe            | Joseph M. Newman      | tt0040502        |
| 1746464971        | 1944        | 1944        | A WAVE, a WAC and a Marine   | A Wave, a WAC and a Marine   | Karlstein, Phil        | Phil Karlson          | tt0037448        |
| 1746520943        | 1950        | 1950        | Hollywood Varieties          | Hollywood Varieties          | Landres, Paul          | Paul Landres          | tt0042570        |
| 1746410675        | 1988        | 1988        | The Kiss                     | The Kiss                     | Densham, Pen           | Pen Densham           | tt0095454        |
| 1746500072        | 1946        | 1946        | Blue Skies                   | Blue Skies                   | Heisler, Stuart        | Stuart Heisler        | tt0038370        |
| 1746563834        | 1952        | 1952        | The Frontier Phantom         | The Frontier Phantom         | Ormond, Ron            | Ron Ormond            | tt0044639        |
| 1746585297        | 1929        | 1929        | Footlights and Fools         | Footlights and Fools         | Seiter, William A.     | William A. Seiter     | tt0019892        |
| 1745342244        | 2001        | 2001        | Pinero                       | Pinero                       | Ichaso, Leon           | Leon Ichaso           | tt0261066        |
| 1746553736        | 1965        | 1965        | Pussy Galore                 | Pussy Galore                 |                        |                       | tt0445652        |
| 1746584407        | 1939        | 1939        | Union Pacific                | Union Pacific                | De Mille, Cecil B.     | Cecil B. DeMille      | tt0032080        |
| 1746420368        | 1992        | 1992        | Juice                        | Juice                        | Dickerson, Ernest R.   | Ernest R. Dickerson   | tt0104573        |
| 1746571381        | 1932        | 1932        | Murders in the Rue Morgue    | Murders in the Rue Morgue    | Florey, Robert         | Robert Florey         | tt0023249        |
| 1746492557        | 1944        | 1944        | Brazil                       | Brazil                       | Santley, Joseph        | Joseph Santley        | tt0036670        |
| 1746572401        | 1931        | 1931        | Heartbreak                   | Heartbreak                   | Werker, Alfred         | Alfred L. Werker      | tt0021946        |
| 1745293375        | 2006        | 2005        | Shadowboxer                  | Shadowboxer                  | Daniels, Lee           | Lee Daniels           | tt0396857        |
| 1746500274        | 1924        | 1924        | That French Lady             | That French Lady             | Mortimer, Edmund       | Edmund Mortimer       | tt0015397        |
| 1746568281        | 1934        | 1934        | The Oil Raider               | The Oil Raider               | Bennet, Spencer Gordon | Spencer Gordon Bennet | tt0282813        |
| 1746574644        | 1933        | 1933        | Secret Sinners               | Secret Sinners               | Ford, Wesley           | Wesley Ford           | tt0024536        |
| 1746394225        | 1990        | 1990        | Look Who's Talking Too       | Look Who's Talking Too       | Heckerling, Amy        | Amy Heckerling        | tt0100050        |
| 1746566198        | 1955        | 1955        | Seven Cities of Gold         | Seven Cities of Gold         | Webb, Robert D.        | Robert D. Webb        | tt0048603        |
| 1746560973        | 1932        | 1932        | The Dentist                  | The Dentist                  | Pearce, Leslie         | Leslie Pearce         | tt0022807        |
| 1746475526        | 1948        | 1948        | Glamour Girl                 | Glamour Girl                 | Dreifuss, Arthur       | Arthur Dreifuss       | tt0040392        |
| 1746580670        | 1939        | 1939        | Trigger Pals                 | Trigger Pals                 | Newfield, Sam          | Sam Newfield          | tt0030893        |
| <b>1746577772</b> | <b>1933</b> | <b>1933</b> | <b>Nagana</b>                | <b>Nagana</b>                | <b>Frank, Ernst L.</b> | <b>Ernst L. Frank</b> | <b>tt0024372</b> |
| 1746492091        | 1945        | 1945        | Son of Lassie                | Son of Lassie                | Simon, S. Sylvan       | S. Sylvan Simon       | tt0038097        |
| 1746454099        | 1941        | 1941        | Under Age                    | Under Age                    | Dmytryk, Edward        | Edward Dmytryk        | tt0034335        |
| 1746580492        | 1936        | 1936        | Back to Nature               | Back to Nature               | Tinling, James         | James Tinling         | tt0027326        |
| 1746500438        | 1927        | 1927        | Lightning                    | Lightning                    | McKay, James C.        | James C. McKay        | tt0018092        |
| 1746565897        | 1953        | 1954        | Miss Robin Crusoe            | Miss Robin Crusoe            | Frenke, Eugene         | Eugene Frenke         | tt0047240        |
| 1746533044        | 1915        | 1915        | One Million Dollars          | One Million Dollars          | Noble, John W.         | John W. Noble         | tt0005837        |
| 1746508530        | 1926        | 1926        | Wild Oats Lane               | Wild Oats Lane               | Neilan, Marshall       | Marshall Neilan       | tt0017559        |
| 1746523445        | 1910        | 1910        | The Ruling Passion           | The Ruling Passion           |                        | William F. Haddock    | tt2239162        |
| 1746503745        | 1920        | 1920        | The Devil's Garden           | The Devil's Garden           | Webb, Kenneth          | Kenneth S. Webb       | tt0011113        |
| 1746582970        | 1936        | 1936        | Winterset                    | Winterset                    | Santell, Alfred        | Alfred Santell        | tt0028511        |
| 1746507592        | 1926        | 1926        | The Non-Stop Flight          | The Non Stop Flight          | Johnson, Emory         | Emory Johnson         | tt0338288        |
| 1746549942        | 1954        | 1954        | Dragnet                      | Dragnet                      | Webb, Jack             | Jack Webb             | tt0046931        |
| 1746508066        | 1925        | 1925        | Code of the West             | Code of the West             | Howard, William K.     | William K. Howard     | tt0015694        |



|            |      |      |                                      |                                      |                       |                      |           |
|------------|------|------|--------------------------------------|--------------------------------------|-----------------------|----------------------|-----------|
| 1746560692 | 1932 | 1932 | The Crooked Circle                   | The Crooked Circle                   | Humberstone, H. Bruce | H. Bruce Humberstone | tt0022788 |
| 1746497618 | 1920 | 1920 | A Dark Lantern                       | A Dark Lantern                       | Robertson, John S.    | John S. Robertson    | tt0010048 |
| 1746584081 | 1935 | 1935 | Navy Wife                            | Navy Wife                            | Dwan, Allan           | Allan Dwan           | tt0026769 |
| 1746273539 | 1979 | 1979 | Van Nuys Blvd.                       | Van Nuys Blvd.                       | Sachs, William        | William Sachs        | tt0080081 |
| 1769970411 | 1966 | 1966 | Aroused                              | Aroused                              | Holden, Anton         | Anton Holden         | tt0060127 |
| 1745340994 | 2008 | 2008 | Prom Night                           | Prom Night                           | McCormick, Nelson     | Nelson McCormick     | tt0926129 |
| 1746553461 | 1964 | 1964 | Santa Claus Conquers the Martians    | Santa Claus Conquers the Martians    | Webster, Nicholas     | Nicholas Webster     | tt0058548 |
| 1746393986 | 1992 | 1992 | Housesitter                          | HouseSitter                          | Oz, Frank             | Frank Oz             | tt0104452 |
| 1746520706 | 1926 | 1926 | Striving for Fortune                 | Striving for Fortune                 | Ross, Nat             | Nat Ross             | tt0017436 |
| 1746574938 | 1933 | 1932 | The Horror                           | The Horror                           | Pollard, Bud          | Bud Pollard          | tt0194949 |
| 1746584715 | 1929 | 1929 | Wolf Song                            | The Wolf Song                        | Fleming, Victor       | Victor Fleming       | tt0020595 |
| 1746577743 | 1934 | 1934 | Dames                                | Dames                                | Enright, Ray          | Ray Enright          | tt0025028 |
| 1746570818 | 1933 | 1933 | Turn Back the Clock                  | Turn Back the Clock                  | Selwyn, Edgar         | Edgar Selwyn         | tt0024704 |
| 1746500833 | 1910 | 1910 | The Samaritan's Courtship            | The Samaritan's Courtship            |                       |                      | tt1787820 |
| 1746565956 | 1953 | 1953 | Mexican Manhunt                      | Mexican Manhunt                      | Bailey, Rex           | Rex Bailey           | tt0046067 |
| 1746576859 | 1932 | 1932 | Night Court                          | Night Court                          | Van Dyke, W. S.       | W.S. Van Dyke        | tt0023268 |
| 1746498304 | 1918 | 1918 | The Splendid Sinner                  | The Splendid Sinner                  | Carewe, Edwin         | Edwin Carewe         | tt0009643 |
| 1746501332 | 1922 | 1922 | I Can Explain                        | I Can Explain                        | Baker, George D.      | George D. Baker      | tt0013260 |
| 1746437337 | 1943 | 1943 | Hoppy Serves a Writ                  | Hoppy Serves a Writ                  | Archainbaud, George   | George Archainbaud   | tt0036016 |
| 1745374557 | 2008 | 2008 | Superhero Movie                      | Superhero Movie                      | Mazin, Craig          | Craig Mazin          | tt0426592 |
| 1746500971 | 1916 | 1916 | The Lost Bracelet                    | The Lost Bracelet                    | Mayo, Melvin          | Frank Mayo           | tt0492180 |
| 1746574486 | 1935 | 1935 | Manhattan Moon                       | Manhattan Moon                       | Walker, Stuart        | Stuart Walker        | tt0026679 |
| 1746500290 | 1949 | 1949 | A Kiss in the Dark                   | A Kiss in the Dark                   | Daves, Delmer         | Delmer Daves         | tt0041550 |
| 1746454377 | 1944 | 1944 | Secret Command                       | Secret Command                       | Sutherland, Eddie     | A. Edward Sutherland | tt0037253 |
| 1746208420 | 1969 | 1969 | The Love God?                        | The Love God?                        | Hiken, Nat            | Nat Hiken            | tt0064606 |
| 1746581499 | 1928 | 1928 | Steamboat Bill, Jr.                  | Steamboat Bill, Jr.                  | Reisner, Charles F.   | Charles Reisner      | tt0019421 |
| 1746514341 | 1910 | 1910 | The Message of the Violin            | The Message of the Violin            | Griffith, D. W.       | D.W. Griffith        | tt0001315 |
| 1746454649 | 1942 | 1942 | Saboteur                             | Saboteur                             | Hitchcock, Alfred     | Alfred Hitchcock     | tt0035279 |
| 1746514876 | 1916 | 1916 | Faith                                | Faith                                | Kirkwood, James       | James Kirkwood       | tt0006662 |
| 1746580502 | 1936 | 1936 | Straight from the Shoulder           | Straight from the Shoulder           | Heisler, Stuart       | Stuart Heisler       | tt0028316 |
| 1746523352 | 1916 | 1916 | The Purification of Mulfera          | The Purification of Mulfers          | Horne, James W.       | James W. Horne       | tt3140204 |
| 1746583320 | 1928 | 1928 | The Floating College                 | The Floating College                 | Crone, George J.      | George Crone         | tt0018898 |
| 1746438301 | 1943 | 1943 | Harrigan's Kid                       | Harrigan's Kid                       | Reisner, Charles F.   | Charles Reisner      | tt0035971 |
| 1746503829 | 1918 | 1918 | The Inn of the Blue Moon             | The Inn of the Blue Moon             | O'Brien, John B.      | John B. O'Brien      | tt0184613 |
| 1746580890 | 1935 | 1935 | Dressed to Thrill                    | Dressed to Thrill                    | Lachman, Harry        | Harry Lachman        | tt0026296 |
| 1746523484 | 1915 | 1915 | Conscience                           | Conscience                           | Paton, Stuart         | Stuart Paton         | tt0189440 |
| 1746409711 | 1988 | 1988 | A Night in the Life of Jimmy Reardon | A Night in the Life of Jimmy Reardon | Richert, William      | William Richert      | tt0095736 |
| 1746515993 | 1921 | 1921 | Thunder Island                       | Thunder Island                       | Dawn, Norman          | Norman Dawn          | tt0012756 |
| 1746501478 | 1915 | 1915 | A Phyllis of the Sierras             | A Phyllis of the Sierras             | Middleton, George E.  | George E. Middleton  | tt0005892 |
| 1746582208 | 1930 | 1930 | The Concentratin' Kid                | The Concentratin' Kid                | Rosson, Arthur        | Arthur Rosson        | tt0020783 |
| 1746435541 | 1943 | 1943 | My Son, the Hero                     | My Son, the Hero                     | Ulmer, Edgar G.       | Edgar G. Ulmer       | tt0036185 |
| 1746565223 | 1953 | 1953 | City of Bad Men                      | City of Bad Men                      | Jones, Harmon         | Harmon Jones         | tt0045632 |
| 1746582948 | 1937 | 1937 | Slim                                 | Slim                                 | Enright, Ray          | Ray Enright          | tt0029579 |
| 1746485616 | 1920 | 1920 | The House of Whispers                | The House of Whispers                | Warde, Ernest C.      | Ernest C. Warde      | tt0011311 |
| 1746491870 | 1946 | 1946 | Don Ricardo Returns                  | Don Ricardo Returns                  | Morse, T. O.          | Terry O. Morse       | tt0162292 |
| 1746438928 | 1942 | 1942 | Between Us Girls                     | Between Us Girls                     | Koster, Henry         | Henry Koster         | tt0034509 |
| 1746454030 | 1943 | 1943 | Tarzan's Desert Mystery              | Tarzan's Desert Mystery              | Thiele, William       | Wilhelm Thiele       | tt0035795 |
| 1746573902 | 1962 | 1962 | Two Before Zero                      | Two Before Zero                      | Faralla, William      | William D. Faralla   | tt0056622 |
| 1746453539 | 1945 | 1944 | To Have and Have Not                 | To Have and Have Not                 | Hawks, Howard         | Howard Hawks         | tt0037382 |
| 1746410519 | 1987 | 1987 | Disorderlies                         | Disorderlies                         | Schultz, Michael      | Michael Schultz      | tt0092897 |
| 1746513032 | 1923 | 1923 | Mothers-in-Law                       | Mothers in Law                       | Gasnier, Louis        | Louis J. Gasnier     | tt0014294 |
| 1746485956 | 1918 | 1918 | Nine-Tenths of the Law               | Nine Tenths of the Law               | Eason, Reeves         | B. Reeves Eason      | tt0009428 |
| 1746524932 | 1923 | 1923 | The Truth About Wives                | The Truth About Wives                | Windom, Lawrence      | Lawrence C. Windom   | tt0014564 |
| 1746584405 | 1939 | 1939 | Fighting Mad                         | Fighting Mad                         | Newfield, Sam         | Sam Newfield         | tt0031305 |
| 1746516114 | 1920 | 1920 | Conrad in Quest of His Youth         | Conrad in Quest of His Youth         | de Mille, William C.  | William C. de Mille  | tt0011070 |
| 1746501052 | 1916 | 1916 | The Eternal Question                 | The Eternal Question                 | King, Burton L.       | Burton L. King       | tt0157604 |
| 1746508102 | 1925 | 1925 | Midnight Molly                       | Midnight Molly                       | Ingraham, Lloyd       | Lloyd Ingraham       | tt0016108 |

|            |      |      |                                         |                                         |                                    |                     |           |
|------------|------|------|-----------------------------------------|-----------------------------------------|------------------------------------|---------------------|-----------|
| 1745358563 | 2009 | 2009 | Fired Up                                | Fired Up!                               | Gluck, Will                        | Will Gluck          | tt1083456 |
| 1746453870 | 1996 | 1996 | The Mirror Has Two Faces                | The Mirror Has Two Faces                | Streisand, Barbra                  | Barbra Streisand    | tt0117057 |
| 1745342711 | 2009 | 2009 | Underworld: Rise of the Lycans          | Underworld: Rise of the Lycans          | Tatopoulos, Patrick                | Patrick Tatopoulos  | tt0834001 |
| 1746393474 | 1981 | 1981 | Paternity                               | Paternity                               | Steinberg, David                   | David Steinberg     | tt0082886 |
| 1746553443 | 1964 | 1964 | Vice Girls, Ltd.                        | Vice Girls Ltd.                         | Chaudhri, Amin                     | Amin Q. Chaudhri    | tt0260504 |
| 1746420042 | 1993 | 1993 | Tombstone                               | Tombstone                               | Cosmatos, George P.                | George P. Cosmatos  | tt0108358 |
| 1746574224 | 1960 | 1960 | Battle of Blood Island                  | Battle of Blood Island                  | Rapp, Joel M.                      | Joel Rapp           | tt0168492 |
| 1746421146 | 1996 | 1996 | Lone Star                               | Lone Star                               | Sayles, John                       | John Sayles         | tt0116905 |
| 1745359631 | 2003 | 2003 | Blue Collar Comedy Tour: The Movie      | Blue Collar Comedy Tour: The Movie      | Harding, C. B.                     | C.B. Harding        | tt0330069 |
| 1746560946 | 1932 | 1932 | Gold                                    | Gold                                    | Brower, Otto                       | Otto Brower         | tt0022951 |
| 1746512432 | 1923 | 1923 | The Little Girl Next Door               | The Little Girl Next Door               | Van Dyke, W. S.                    | W.S. Van Dyke       | tt0014203 |
| 1746584816 | 1930 | 1930 | Men Without Law                         | Men Without Law                         | King, Louis                        | Louis King          | tt0021139 |
| 1746439127 | 1941 | 1941 | Caught in the Act                       | Caught in the Act                       | Yarbrough, Jean                    | Jean Yarbrough      | tt0033454 |
| 1746419745 | 1940 | 1940 | Gun Code                                | Gun Code                                |                                    | Sam Newfield        | tt0032563 |
| 1746580508 | 1935 | 1935 | Together We Live                        | Together We Live                        | Mack, Willard                      | Willard Mack        | tt0027116 |
| 1746410356 | 1987 | 1986 | Sorority House Massacre                 | Sorority House Massacre                 | Frank, Carol                       | Carol Frank         | tt0091990 |
| 1746418621 | 1940 | 1940 | World in Flames                         | World in Flames                         |                                    |                     | tt6424172 |
| 1746577998 | 1934 | 1935 | I've Been Around                        | I've Been Around                        | Cahn, Phil                         | Philip Cahn         | tt0026515 |
| 1746503429 | 1918 | 1918 | The Wife He Bought                      | The Wife He Bought                      | Solter, Harry                      | Harry Solter        | tt0009807 |
| 1746574884 | 1935 | 1934 | Western Justice                         | Western Justice                         | Bradbury, Robert N.                | Robert N. Bradbury  | tt0027199 |
| 1746582396 | 1950 | 1950 | Sunset Blvd.                            | Sunset Blvd.                            | Wildier, Billy                     | Billy Wildier       | tt0043014 |
| 1746566124 | 1953 | 1953 | Pony Express                            | Pony Express                            | Hopper, Jerry                      | Jerry Hopper        | tt0046198 |
| 1746578998 | 1960 | 1960 | North to Alaska                         | North to Alaska                         | Hathaway, Henry                    | Henry Hathaway      | tt0054127 |
| 1746561522 | 1957 | 1957 | Naked Paradise                          | Naked Paradise                          | Corman, Roger                      | Roger Corman        | tt0050748 |
| 1746270442 | 1980 | 1979 | The Great Santini                       | The Great Santini                       | Carlino, Lewis John                | Lewis John Carlino  | tt0079239 |
| 1746584970 | 1940 | 1940 | The Border Legion                       | The Border Legion                       | Kane, Joseph                       | Joseph Kane         | tt0032274 |
| 1746185870 | 1969 | 1969 | Hail, Hero!                             | Hail, Hero!                             | Miller, David                      | David Miller        | tt0064399 |
| 1745357931 | 2001 | 2000 | Pie in the Sky: The Brigid Berlin Story | Pie in the Sky: The Brigid Berlin Story | Fremont, Vincent ; Fremont, Shelly | Shelly Dunn Fremont | tt0261174 |
| 1746475720 | 1944 | 1944 | The Merry Monahans                      | The Merry Monahans                      | Lamont, Charles                    | Charles Lamont      | tt0037070 |
| 1746408424 | 1981 | 1981 | Chu Chu and the Philly Flash            | Chu Chu and the Philly Flash            | Rich, David Lowell                 | David Lowell Rich   | tt0082177 |
| 1745302364 | 2007 | 2006 | Hatchet                                 | Hatchet                                 | Green, Adam                        | Adam Green          | tt0422401 |
| 1746200493 | 1968 | 1968 | 5 Card Stud                             | 5 Card Stud                             | Hathaway, Henry                    | Henry Hathaway      | tt0062626 |
| 1746523737 | 1923 | 1923 | Alice Adams                             | Alice Adams                             | Lee, Rowland V.                    | Rowland V. Lee      | tt0013822 |
| 1746492405 | 1948 | 1948 | Old Los Angeles                         | Old Los Angeles                         | Kane, Joe                          | Joseph Kane         | tt0040469 |
| 1746437431 | 1940 | 1940 | The Blue Bird                           | The Blue Bird                           | Lang, Walter                       | Walter Lang         | tt0032264 |
| 1746572562 | 1932 | 1932 | Careless Lady                           | Careless Lady                           | MacKenna, Kenneth                  | Kenneth MacKenna    | tt0022746 |
| 1746208184 | 1969 | 1969 | The House Near the Prado                | The House Near the Prado                | Van Hearn, J.                      | Jean Van Hearn      | tt0064447 |
| 1746570584 | 1934 | 1934 | Our Daily Bread                         | Our Daily Bread                         | Vidor, King                        | King Vidor          | tt0025610 |
| 1746501929 | 1913 | 1913 | One Hundred Years of Mormonism          | One Hundred Years of Mormonism          |                                    | Norval MacGregor    | tt0003241 |
| 1746583413 | 1930 | 1930 | Ladies in Love                          | Ladies in Love                          | Lewis, Edgar                       | Edgar Lewis         | tt0021039 |
| 1746200188 | 1966 | 1965 | The Money Trap                          | The Money Trap                          | Kennedy, Burt                      | Burt Kennedy        | tt0059460 |
| 1746454641 | 1941 | 1941 | Spooks Run Wild                         | Spooks Run Wild                         | Rosen, Phil                        | Phil Rosen          | tt0034224 |
| 1746560094 | 1964 | 1964 | Day of a Stripper                       | Day of a Stripper                       |                                    |                     | tt0445318 |
| 1746434000 | 1997 | 1997 | Gridlock'd                              | Gridlock'd                              | Hall, Vondie Curtis                | Vondie Curtis       | tt0119225 |
| 1746574091 | 1960 | 1960 | 13 Fighting Men                         | 13 Fighting Men                         | Gerstad, Harry                     | Harry W. Gerstad    | tt0053558 |
| 1746583878 | 1929 | 1929 | Saturday's Children                     | Saturday's Children                     | La Cava, Gregory                   | Gregory La Cava     | tt0020365 |
| 1746583207 | 1931 | 1931 | Is There Justice?                       | Is There Justice?                       | Paton, Stuart                      | Stuart Paton        | tt0022003 |
| 1746454836 | 1946 | 1946 | Beware                                  | Beware                                  | Pollard, Bud                       | Bud Pollard         | tt0038353 |
| 1746514850 | 1916 | 1916 | Wild Oats                               | Wild Oats                               | Gollan, Campbell                   | Campbell Gullan     | tt0274217 |
| 1746520451 | 1949 | 1949 | Sky Liner                               | Sky Liner                               | Berke, Wm.                         | William Berke       | tt0178896 |
| 1746501414 | 1923 | 1923 | Jazzmania                               | Jazzmania                               | Leonard, Robert Z.                 | Robert Z. Leonard   | tt0014164 |
| 1746493843 | 1913 | 1913 | Robin Hood                              | Robin Hood                              |                                    | Theodore Marston    | tt0003337 |
| 1746502215 | 1916 | 1916 | The Criminal                            | The Criminal                            | Barker, Reginald                   | Reginald Barker     | tt0161465 |
| 1746580628 | 1935 | 1935 | Desert Mesa                             | Desert Mesa                             | James, Art                         | Victor Adamson      | tt0026272 |
| 1746419138 | 1988 | 1988 | The Thin Blue Line                      | The Thin Blue Line                      | Morris, Errol                      | Errol Morris        | tt0096257 |
| 1746198153 | 1969 | 1969 | My Girlfriend's Wedding                 | My Girlfriend's Wedding                 | McBride, Jim                       | Jim McBride         | tt0064706 |
| 1746435238 | 1940 | 1940 | South of Pago Pago                      | South of Pago Pago                      | Green, Alfred E.                   | Alfred E. Green     | tt0033082 |

|                   |             |             |                                                |                                            |                              |                       |                  |
|-------------------|-------------|-------------|------------------------------------------------|--------------------------------------------|------------------------------|-----------------------|------------------|
| 1746495874        | 1920        | 1920        | Sophy of Kravonia; or, the Virgin of Paris     | Sophy of Kravonia; or, The Virgin of Paris | Fontaine, Gerard             | Gerard Fontaine       | tt0197907        |
| 1746393695        | 1984        | 1984        | Friday the 13th: The Final Chapter             | Friday the 13th: The Final Chapter         | Zito, Joseph                 | Joseph Zito           | tt0087298        |
| 1746569792        | 1957        | 1957        | Black Patch                                    | Black Patch                                | Miner, Allen H.              | Allen H. Miner        | tt0050196        |
| 1769969379        | 1930        | 1930        | Western Knights                                | Western Knights                            | Roberts, Stephen             | Stephen Roberts       | tt0021541        |
| 1746500506        | 1926        | 1926        | The Strong Man                                 | The Strong Man                             | Capra, Frank                 | Frank Capra           | tt0017437        |
| 1746574098        | 1961        | 1961        | One-Eyed Jacks                                 | One Eyed Jacks                             | Brando, Marlon               | Marlon Brando         | tt0055257        |
| 1746563646        | 1952        | 1951        | The Model and the Marriage Broker              | The Model and the Marriage Broker          | Cukor, George                | George Cukor          | tt0043813        |
| 1746234825        | 1976        | 1976        | The Shootist                                   | The Shootist                               | Siegel, Don                  | Don Siegel            | tt0075213        |
| <b>1746532713</b> | <b>1923</b> | <b>1923</b> | <b>Tea--With a Kick</b>                        | <b>Tea: With a Kick!</b>                   | <b>Kenton, Erle C.</b>       | <b>Erle C. Kenton</b> | <b>tt0014527</b> |
| 1746581653        | 1951        | 1951        | The Lion Hunters                               | The Lion Hunters                           | Beebe, Ford                  | Ford Beebe            | tt0043746        |
| 1746202900        | 1970        | 1970        | Little Big Man                                 | Little Big Man                             | Penn, Arthur                 | Arthur Penn           | tt0065988        |
| 1746514947        | 1916        | 1916        | For the Defense                                | For the Defense                            | Reicher, Frank               | Frank Reicher         | tt0006696        |
| 1746582212        | 1931        | 1931        | Quick Millions                                 | Quick Millions                             | Brown, Rowland               | Rowland Brown         | tt0022290        |
| 1745339879        | 2002        | 2002        | Road to Perdition                              | Road to Perdition                          | Mendes, Sam                  | Sam Mendes            | tt0257044        |
| 1746421520        | 1940        | 1940        | Comin' Round the Mountain                      | Comin' Round the Mountain                  | Archainbaud, George          | George Archainbaud    | tt0032347        |
| 1745339992        | 2001        | 2001        | The Fast and the Furious                       | The Fast and the Furious                   | Cohen, Rob                   | Rob Cohen             | tt0232500        |
| 1746584313        | 1940        | 1940        | My Favorite Wife                               | My Favorite Wife                           | Kanin, Garson                | Garson Kanin          | tt0029284        |
| 1746577307        | 1962        | 1962        | Paradise Alley                                 | Paradise Alley                             | Haas, Hugo                   | Hugo Haas             | tt0055274        |
| 1746503563        | 1922        | 1922        | The Three Must-Get-Theres                      | The Three Must Get Theres                  | Linder, Max                  | Max Linder            | tt0013674        |
| 1746582639        | 1934        | 1934        | The Show-Off                                   | The Show Off                               | Riesner, Charles F.          | Charles Reisner       | tt0025785        |
| 1746580370        | 1936        | 1936        | Charlie Chan's Secret                          | Charlie Chan's Secret                      | Wiles, Gordon                | Gordon Wiles          | tt0027442        |
| 1746499897        | 1948        | 1948        | The Story of Life                              | The Story of Life                          | Bretherton, Howard           | Howard Bretherton     | tt0040836        |
| 1746508276        | 1924        | 1924        | The Passing of Wolf MacLean                    | The Passing of Wolf MacLean                | Hurst, Paul                  | Paul Hurst            | tt0015215        |
| 1746438158        | 1944        | 1944        | Mrs. Parkington                                | Mrs. Parkington                            | Garnett, Tay                 | Tay Garnett           | tt0037096        |
| 1746520794        | 1925        | 1925        | Simon the Jester                               | Simon the Jester                           | Melford, George              | George Melford        | tt0016354        |
| 1746465094        | 1947        | 1947        | A Night at the Follies                         | A Night at the Follies                     | Connell, W. Merle            | W. Merle Connell      | tt0147089        |
| 1745373462        | 2004        | 2004        | Noel                                           | Noel                                       | Palminteri, Chazz            | Chazz Palminteri      | tt0383534        |
| 1746217358        | 1968        | 1967        | Wavelength                                     | Wavelength                                 | Snow, Michael                | Michael Snow          | tt0127354        |
| 1746577536        | 1934        | 1934        | Success at Any Price                           | Success at Any Price                       | Ruben, J. Walter             | J. Walter Ruben       | tt0025844        |
| 1746583064        | 1939        | 1939        | The Return of the Cisco Kid                    | Return of the Cisco Kid                    | Leeds, Herbert I.            | Herbert I. Leeds      | tt0031852        |
| 1746569955        | 1959        | 1959        | Good Day for a Hanging                         | Good Day for a Hanging                     | Juran, Nathan                | Nathan Juran          | tt0051673        |
| 1745309489        | 2007        | 2007        | Martian Child                                  | Martian Child                              | Meyjes, Menno                | Menno Meyjes          | tt0415965        |
| 1746584080        | 1939        | 1939        | Silver on the Sage                             | Silver on the Sage                         | Selander, Lesley             | Lesley Selander       | tt0031925        |
| 1746532940        | 1916        | 1916        | The Man Behind the Curtain                     | The Man Behind the Curtain                 | Van Deusen, Courtlandt J.    | Cortland Van Deusen   | tt0163085        |
| 1746520657        | 1926        | 1926        | Sunshine of Paradise Alley                     | Sunshine of Paradise Alley                 | Nelson, Jack                 | Jack Nelson           | tt0017442        |
| 1746439234        | 1996        | 1996        | Don't Be a Menace to South Central While Drink | Don't Be a Menace to South Central While D | Barclay, Paris               | Paris Barclay         | tt0116126        |
| 1746574135        | 1958        | 1958        | Ten North Frederick                            | Ten North Frederick                        | Dunne, Philip                | Philip Dunne          | tt0052283        |
| 1746572418        | 1931        | 1931        | The Avenger                                    | The Avenger                                | Neill, Roy William           | Roy William Neill     | tt0021630        |
| 1746394726        | 1989        | 1989        | Drugstore Cowboy                               | Drugstore Cowboy                           | Van Sant, Gus                | Gus Van Sant          | tt0097240        |
| 1746512921        | 1916        | 1916        | Through the Wall                               | Through the Wall                           | Sturgeon, Rollin S.          | Rollin S. Sturgeon    | tt0007457        |
| 1746583959        | 1930        | 1930        | The Runaway Bride                              | Runaway Bride                              | Crisp, Donald                | Donald Crisp          | tt0021324        |
| 1746474840        | 1947        | 1947        | Desire Me                                      | Desire Me                                  | Cukor, George; LeRoy, Mervyn | Jack Conway           | tt0039312        |
| 1746464916        | 1941        | 1941        | Gambling Daughters                             | Gambling Daughters                         | Nosseck, Max                 | Max Nosseck           | tt0033645        |
| 1746582930        | 1935        | 1935        | Last of the Clintons                           | The Last of the Clintons                   | Fraser, Harry                | Harry L. Fraser       | tt0026608        |
| 1746520463        | 1950        | 1950        | Cry Murder                                     | Cry Murder                                 | Glenn, Jack                  | Jack Glenn            | tt0042357        |
| 1746508975        | 1926        | 1926        | Walloping Kid                                  | Walloping Kid                              | Horner, Robert J.            | Robert J. Horner      | tt0017523        |
| 1746570715        | 1952        | 1952        | The Steel Trap                                 | The Steel Trap                             | Stone, Andrew                | Andrew L. Stone       | tt0045190        |
| 1746520273        | 1925        | 1925        | The Fighting Romeo                             | The Fighting Romeo                         | Ferguson, Al                 | Al Ferguson           | tt0132949        |
| 1746566154        | 1957        | 1957        | Jet Pilot                                      | Jet Pilot                                  | Sternberg, Josef von         | Josef von Sternberg   | tt0050562        |
| 1746500047        | 1924        | 1924        | Range Blood                                    | Range Blood                                | Ford, Francis                | Francis Ford          | tt0015260        |
| 1746435241        | 1941        | 1941        | When Ladies Meet                               | When Ladies Meet                           | Leonard, Robert Z.           | Robert Z. Leonard     | tt0034386        |
| 1746553717        | 1964        | 1964        | Strange Compulsion                             | Strange Compulsion                         | Berwick, Irvin               | Irvin Berwick         | tt0199052        |
| 1746565944        | 1955        | 1955        | Bobby Ware Is Missing                          | Bobby Ware Is Missing                      | Carr, Thomas                 | Thomas Carr           | tt0047893        |
| 1746562165        | 1954        | 1954        | Sabrina                                        | Sabrina                                    | Wildier, Billy               | Billy Wildier         | tt0047437        |
| 1746409957        | 1987        | 1987        | Burglar                                        | Burglar                                    | Wilson, Hugh                 | Hugh Wilson           | tt0092710        |
| 1746436075        | 1943        | 1943        | My Friend Flicka                               | My Friend Flicka                           | Schuster, Harold             | Harold D. Schuster    | tt0036182        |
| 1746454828        | 1945        | 1945        | Sunbonnet Sue                                  | Sunbonnet Sue                              | Murphy, Ralph                | Ralph Murphy          | tt0038135        |

|                   |             |             |                                                   |                                               |                               |                        |                  |
|-------------------|-------------|-------------|---------------------------------------------------|-----------------------------------------------|-------------------------------|------------------------|------------------|
| 1746555975        | 1955        | 1955        | Seminole Uprising                                 | Seminole Uprising                             | Bellamy, Earl                 | Earl Bellamy           | tt0048600        |
| 1746508715        | 1925        | 1925        | Slow Dynamite                                     | Slow Dynamite                                 | Mattison, Frank S.            | Frank S. Mattison      | tt0165478        |
| 1746410018        | 1988        | 1988        | Torch Song Trilogy                                | Torch Song Trilogy                            | Bogart, Paul                  | Paul Bogart            | tt0096289        |
| 1746464920        | 1941        | 1941        | Charlie Chan in Rio                               | Charlie Chan in Rio                           | Lachman, Harry                | Harry Lachman          | tt0033458        |
| 1746454254        | 1944        | 1944        | Bordertown Trail                                  | Bordertown Trail                              | Selander, Lesley              | Lesley Selander        | tt0036662        |
| 1746503384        | 1921        | 1921        | The Iron Trail                                    | The Iron Trail                                | Neill, R. William             | Roy William Neill      | tt0012322        |
| 1746502432        | 1917        | 1917        | The Girl Who Didn't Think                         | The Girl Who Didn't Think                     | Haddock, William              | William F. Haddock     | tt0175668        |
| 1746434679        | 1992        | 1992        | Newsies                                           | Newsies                                       | Ortega, Kenny                 | Kenny Ortega           | tt0104990        |
| 1746475779        | 1945        | 1945        | Mom and Dad                                       | Mom and Dad                                   | Beaudine, William             | William Beaudine       | tt0040603        |
| 1746577216        | 1961        | 1961        | King of the Roaring 20's--The Story of Arnold Rot | King of the Roaring 20's: The Story of Arnold | Newman, Joseph M.             | Joseph M. Newman       | tt0055048        |
| 1746583895        | 1931        | 1931        | Blonde Crazy                                      | Blonde Crazy                                  | Del Ruth, Roy                 | Roy Del Ruth           | tt0021673        |
| 1746393507        | 1988        | 1988        | Halloween 4: The Return of Michael Myers          | Halloween 4: The Return of Michael Myers      | Little, Dwight H.             | Dwight H. Little       | tt0095271        |
| 1746580233        | 1938        | 1938        | King of the Sierras                               | King of the Sierras                           | Diege, Samuel                 | Samuel Diege           | tt0030324        |
| 1746508121        | 1925        | 1925        | The Night Ship                                    | The Night Ship                                | McCarthy, Henry               | Henry McCarty          | tt0016158        |
| 1746502582        | 1916        | 1916        | The Surprises of an Empty Hotel                   | The Surprises of an Empty Hotel               | Marston, Theodore             | Theodore Marston       | tt0159008        |
| 1746566352        | 1958        | 1958        | Desire Under the Elms                             | Desire Under the Elms                         | Mann, Delbert                 | Delbert Mann           | tt0051534        |
| 1746495587        | 1921        | 1921        | Montana Bill                                      | Montana Bill                                  | Goldstone, Phil               | Phil Goldstone         | tt0012471        |
| 1746574099        | 1956        | 1956        | The Desperados Are in Town                        | The Desperados Are in Town                    | Neumann, Kurt                 | Kurt Neumann           | tt0049135        |
| 1746566248        | 1953        | 1953        | Rebel City                                        | Rebel City                                    | Carr, Thomas                  | Thomas Carr            | tt0046230        |
| 1746515786        | 1922        | 1922        | Rent Free                                         | Rent Free                                     | Higgin, Howard                | Howard Higgin          | tt0013546        |
| 1746435119        | 1943        | 1943        | The Outlaw                                        | The Outlaw                                    | Hughes, Howard; Hawks, Howard | Howard Hughes          | tt0036241        |
| 1746576968        | 1951        | 1951        | The Strip                                         | The Strip                                     | Kardos, Leslie                | László Kardos          | tt0044083        |
| 1746532651        | 1915        | 1915        | Strathmore                                        | Strathmore                                    | Grandon, Francis              | Francis J. Grandon     | tt0006107        |
| 1746198551        | 1969        | 1969        | Flareup                                           | Flareup                                       | Neilson, James                | James Neilson          | tt0064333        |
| 1746585326        | 1930        | 1930        | The Lottery Bride                                 | The Lottery Bride                             | Stein, Paul L.                | Paul L. Stein          | tt0021094        |
| 1746508768        | 1949        | 1949        | Bomba, the Jungle Boy                             | Bomba, the Jungle Boy                         | Beebe, Ford                   | Ford Beebe             | tt0041196        |
| 1746524551        | 1927        | 1927        | The Cyclone Cowboy                                | The Cyclone Cowboy                            | Thorpe, Richard               | Richard Thorpe         | tt0017787        |
| 1746512346        | 1927        | 1927        | The Bandit's Son                                  | The Bandit's Son                              | Fox, Wallace W.               | Wallace Fox            | tt0017659        |
| 1746509271        | 1925        | 1926        | Going the Limit                                   | Going the Limit                               | Worne, Duke                   | Chester Withey         | tt0133811        |
| 1746574571        | 1936        | 1936        | Satan Met a Lady                                  | Satan Met a Lady                              | Dieterle, William             | William Dieterle       | tt0028219        |
| 1746585247        | 1930        | 1930        | Sunny Skies                                       | Sunny Skies                                   | Taurog, Norman                | Norman Taurog          | tt0021436        |
| 1746584894        | 1939        | 1939        | The Taming of the West                            | Taming of the West                            | Deming, Norman                | Norman Deming          | tt0032006        |
| 1746208567        | 1970        | 1970        | Zabriskie Point                                   | Zabriskie Point                               | Antonioni, Michelangelo       | Michelangelo Antonioni | tt0066601        |
| 1746524895        | 1914        | 1914        | Life's Shop Window                                | Life's Shop Window                            | Edwards, J. Gordon            | J. Gordon Edwards      | tt0004224        |
| 1746581185        | 1910        | 1910        | A Knot in the Plot                                | A Knot in the Plot                            | Powell, Frank                 | Frank Powell           | tt0001278        |
| 1746584748        | 1930        | 1930        | Top Speed                                         | Top Speed                                     | LeRoy, Mervyn                 | Mervyn LeRoy           | tt0021486        |
| 1746502231        | 1915        | 1915        | The Lamb                                          | The Lamb                                      | Cabanne, W. Christy           | Christy Cabanne        | tt0005600        |
| 1746492751        | 1946        | 1946        | The Spider Woman Strikes Back                     | The Spider Woman Strikes Back                 | Lubin, Arthur                 | Arthur Lubin           | tt0038974        |
| 1746454639        | 1942        | 1942        | The Phantom Plainsmen                             | The Phantom Plainsmen                         | English, John                 | John English           | tt0035186        |
| 1746464905        | 1941        | 1941        | Arkansas Judge                                    | Arkansas Judge                                | McDonald, Frank               | Frank McDonald         | tt0033353        |
| 1746454073        | 1940        | 1940        | The Fighting 69th                                 | The Fighting 69th                             | Keighley, William             | William Keighley       | tt0032467        |
| 1746514582        | 1923        | 1923        | McGuire of the Mounted                            | McGuire of the Mounted                        | Stanton, Richard              | Richard Stanton        | tt0014265        |
| 1746524844        | 1928        | 1928        | Object--Alimony                                   | Object: Alimony                               | Dunlap, Scott R.              | Scott R. Dunlap        | tt0019224        |
| 1746485591        | 1919        | 1919        | Thunderbolts of Fate                              | Thunderbolts of Fate                          | Warren, Edward                | Edward Warren          | tt0010780        |
| 1746464771        | 1942        | 1942        | My Favorite Blonde                                | My Favorite Blonde                            | Lanfield, Sidney              | Sidney Lanfield        | tt0035100        |
| 1746520177        | 1926        | 1926        | The Set-Up                                        | The Set Up                                    | Smith, Clifford S.            | Clifford Smith         | tt0017367        |
| 1746566196        | 1953        | 1953        | The Vanquished                                    | The Vanquished                                | Ludwig, Edward                | Edward Ludwig          | tt0046492        |
| 1746436356        | 1943        | 1943        | His Butler's Sister                               | His Butler's Sister                           | Borzage, Frank                | Frank Borzage          | tt0036001        |
| 1746516321        | 1921        | 1921        | The Stranger in Canyon Valley                     | The Stranger in Canyon Valley                 | Smith, Cliff                  | Clifford Smith         | tt0341022        |
| 1769970622        | 1968        | 1968        | She-Devils on Wheels                              | She Devils on Wheels                          | Lewis, Herschell Gordon       | Herschell Gordon Lewis | tt0063595        |
| 1746218708        | 1974        | 1973        | The Golden Voyage of Sinbad                       | The Golden Voyage of Sinbad                   | Hessler, Gordon               | Gordon Hessler         | tt0071569        |
| 1746573967        | 1961        | 1961        | Nikki, Wild Dog of the North                      | Nikki, Wild Dog of the North                  |                               | Jack Couffer           | tt0055232        |
| 1769970109        | 1912        | 1912        | Bessie's Dream                                    | Bessie's Dream                                |                               | Colin Campbell         | tt0416520        |
| 1746420957        | 1995        | 1996        | Fun                                               | The Fan                                       | Zielinski, Rafal              | Tony Scott             | tt0116277        |
| 1746530724        | 1949        | 1949        | Tough Assignment                                  | Tough Assignment                              | Beaudine, William             | William Beaudine       | tt0041976        |
| <b>1746585424</b> | <b>1940</b> | <b>1940</b> | <b>Brother Orchid</b>                             | <b>Brother Orchid</b>                         | <b>Bacon, Lloyd</b>           | <b>Lloyd Bacon</b>     | <b>tt0032285</b> |
| 1746508184        | 1925        | 1925        | The Overland Limited                              | The Overland Limited                          | O'Neill, Frank                | Frank O'Neill          | tt0016192        |

|            |      |      |                                     |                                     |                       |                      |           |
|------------|------|------|-------------------------------------|-------------------------------------|-----------------------|----------------------|-----------|
| 1746487049 | 1919 | 1919 | Fortune's Child                     | Fortune's Child                     | Gleason, Joseph       | Joseph Gleason       | tt0325415 |
| 1746453820 | 1942 | 1942 | Drums of the Congo                  | Drums of the Congo                  | Cabanne, Christy      | Christy Cabanne      | tt0034684 |
| 1746566011 | 1953 | 1953 | So Big                              | So Big                              | Wise, Robert          | Robert Wise          | tt0046333 |
| 1746437019 | 1943 | 1943 | Jitterbugs                          | Jitterbugs                          | St. Clair, Mal        | Malcolm St. Clair    | tt0036055 |
| 1745342874 | 2008 | 2008 | The Curious Case of Benjamin Button | The Curious Case of Benjamin Button | Fincher, David        | David Fincher        | tt0421715 |
| 1746520364 | 1925 | 1925 | The Wrongdoers                      | The Wrongdoers                      | Dierker, Hugh         | Hugh Dierker         | tt0016553 |
| 1746465262 | 1944 | 1944 | In Society                          | In Society                          | Yarbrough, Jean       | Jean Yarbrough       | tt0036953 |
| 1746520942 | 1949 | 1949 | The Great Sinner                    | The Great Sinner                    | Siodmak, Robert       | Robert Siodmak       | tt0041430 |
| 1746576502 | 1932 | 1932 | Strange Justice                     | Strange Justice                     | Schertzinger, Victor  | Victor Schertzinger  | tt0023524 |
| 1746409477 | 1987 | 1987 | Barfly                              | Barfly                              | Schroeder, Barbet     | Barbet Schroeder     | tt0092618 |
| 1746454066 | 1943 | 1943 | Night Plane from Chungking          | Night Plane from Chungking          | Murphy, Ralph         | Ralph Murphy         | tt0035125 |
| 1746513434 | 1917 | 1917 | American--That's All                | American That's All                 | Rosson, Arthur        | Arthur Rosson        | tt0007632 |
| 1746574303 | 1962 | 1962 | Fallguy                             | Fallguy                             | Harling, Donn         | Donn Harling         | tt0055974 |
| 1746235860 | 1973 | 1973 | Magnum Force                        | Magnum Force                        | Post, Ted             | Ted Post             | tt0070355 |
| 1745393664 | 2009 | 2008 | It Might Get Loud                   | It Might Get Loud                   | Guggenheim, Davis     | Davis Guggenheim     | tt1229360 |
| 1746568224 | 1934 | 1934 | Young and Beautiful                 | Young and Beautiful                 | Santley, Joseph       | Joseph Santley       | tt0026019 |
| 1746584444 | 1930 | 1930 | The Other Tomorrow                  | The Other Tomorrow                  | Bacon, Lloyd          | Lloyd Bacon          | tt0021222 |
| 1745293591 | 2006 | 2005 | Dave Chappelle's Block Party        | Dave Chappelle's Block Party        | Gondry, Michel        | Michel Gondry        | tt0425598 |
| 1746584288 | 1935 | 1935 | The Irish Gringo                    | The Irish Gringo                    | Thompson, Wm. C.      | William C. Thompson  | tt0027801 |
| 1746454303 | 1941 | 1941 | Rookies on Parade                   | Rookies on Parade                   | Santley, Joseph       | Joseph Santley       | tt0034129 |
| 1746520634 | 1926 | 1926 | Tramp, Tramp, Tramp                 | Tramp, Tramp, Tramp                 | Edwards, Harry        | Harry Edwards        | tt0017483 |
| 1746500171 | 1926 | 1926 | Lure of the West                    | Lure of the West                    | Neitz, Alvin J.       | Alan James           | tt0016056 |
| 1745340264 | 2002 | 2002 | Austin Powers in Goldmember         | Austin Powers in Goldmember         | Roach, Jay            | Jay Roach            | tt0295178 |
| 1745358507 | 2004 | 2004 | Benji: Off the Leash!               | Benji: Off the Leash!               | Camp, Joe             | Joe Camp             | tt0315273 |
| 1746520210 | 1949 | 1949 | A Woman's Secret                    | A Woman's Secret                    | Ray, Nicholas         | Nicholas Ray         | tt0042053 |
| 1746491998 | 1947 | 1947 | Killer McCoy                        | Killer McCoy                        | Rowland, Roy          | Roy Rowland          | tt0039531 |
| 1746437143 | 1997 | 1997 | The Ice Storm                       | The Ice Storm                       | Lee, Ang              | Ang Lee              | tt0119349 |
| 1746584339 | 1936 | 1936 | Stormy Trails                       | Stormy Trails                       | Newfield, Sam         | Sam Newfield         | tt0028311 |
| 1746502894 | 1912 | 1912 | The Ambitious Butler                | Ambitious Butler                    | Sennett, Mack         | Mack Sennett         | tt0002017 |
| 1746533223 | 1916 | 1915 | By Whose Hand?                      | By Whose Hand?                      | Durkin, James         | Hamilton Smith       | tt1148240 |
| 1746520876 | 1950 | 1950 | The Golden Twenties                 | The Golden Twenties                 |                       |                      | tt0249549 |
| 1746393469 | 1985 | 1985 | The Man with One Red Shoe           | The Man with One Red Shoe           | Dragoti, Stan         | Stan Dragoti         | tt0089543 |
| 1746524272 | 1923 | 1923 | The Ranchers                        | The Ranchers                        |                       | George Elliot        | tt0014395 |
| 1746507896 | 1925 | 1925 | Tessie                              | Tessie                              | Fitzgerald, Dallas M. | Dallas M. Fitzgerald | tt0016415 |
| 1746410671 | 1992 | 1992 | Hellraiser III: Hell on Earth       | Hellraiser III: Hell on Earth       | Hickox, Anthony       | Anthony Hickox       | tt0104409 |
| 1746524663 | 1917 | 1917 | Hate                                | Hate                                | Stahl, Walter Richard | Walter Richard Stahl | tt0008050 |
| 1746572833 | 1931 | 1931 | Too Young to Marry                  | Too Young to Marry                  | LeRoy, Mervyn         | Mervyn LeRoy         | tt0020715 |
| 1746464946 | 1942 | 1942 | Boot Hill Bandits                   | Boot Hill Bandits                   | Luby, S. Roy          | S. Roy Luby          | tt0034541 |
| 1746421153 | 1997 | 1997 | The Man Who Knew Too Little         | The Man Who Knew Too Little         | Amiel, Jon            | Jon Amiel            | tt0120483 |
| 1746577955 | 1934 | 1934 | Looking for Trouble                 | Looking for Trouble                 | Wellman, William      | William A. Wellman   | tt0025418 |
| 1746475919 | 1946 | 1946 | Night and Day                       | Night and Day                       | Curtiz, Michael       | Michael Curtiz       | tt0038776 |
| 1745396001 | 2009 | 2009 | Paul Blart Mall Cop                 | Paul Blart: Mall Cop                | Carr, Steve           | Steve Carr           | tt1114740 |
| 1746563836 | 1951 | 1951 | When the Redskins Rode              | When the Redskins Rode              | Landers, Lew          | Lew Landers          | tt0044208 |
| 1746453814 | 1943 | 1943 | The Battle of Russia                | The Battle of Russia                | Litvak, Anatole       | Frank Capra          | tt0036629 |
| 1746578402 | 1960 | 1960 | Morals Squad                        | Morals Squad                        |                       | Barry Mahon          | tt0312977 |
| 1745341580 | 2003 | 2002 | People I Know                       | People I Know                       | Algrant, Dan          | Daniel Algrant       | tt0274711 |
| 1746233616 | 1967 | 1967 | Young Americans                     | Young Americans                     | Grasshoff, Alex       | Alexander Grasshoff  | tt0062515 |
| 1746271965 | 1966 | 1966 | The Girl From Tobacco Row           | Girl from Tobacco Row               | Ormond, Ron           | Ron Ormond           | tt0060459 |
| 1746583760 | 1929 | 1928 | Sal of Singapore                    | Sal of Singapore                    | Higgin, Howard        | Howard Higgin        | tt0019348 |
| 1745293730 | 2006 | 2006 | Hollywoodland                       | Hollywoodland                       | Coulter, Allen        | Allen Coulter        | tt0427969 |
| 1746453713 | 1999 | 1999 | Boys Don't Cry                      | Boys Don't Cry                      | Peirce, Kimberly      | Kimberly Peirce      | tt0171804 |
| 1746585414 | 1940 | 1940 | The Doctor Takes A Wife             | The Doctor Takes a Wife             | Hall, Alexander       | Alexander Hall       | tt0032397 |
| 1746516122 | 1921 | 1921 | False Women                         | False Women                         | Armstrong, R. Dale    | R. Dale Armstrong    | tt0131382 |
| 1746497550 | 1922 | 1922 | Sherlock Holmes                     | Sherlock Holmes                     | Parker, Albert        | Albert Parker        | tt0013597 |
| 1746562318 | 1953 | 1953 | The Diamond Queen                   | The Diamond Queen                   | Brahm, John           | John Brahm           | tt0045687 |
| 1746569536 | 1956 | 1956 | These Wilder Years                  | These Wilder Years                  | Rowland, Roy          | Roy Rowland          | tt0049844 |
| 1746475901 | 1948 | 1948 | Arch of Triumph                     | Arch of Triumph                     | Milestone, Lewis      | Lewis Milestone      | tt0040109 |

|            |      |      |                                            |                                            |                        |                       |           |
|------------|------|------|--------------------------------------------|--------------------------------------------|------------------------|-----------------------|-----------|
| 1745358982 | 2002 | 2002 | Adaptation.                                | Adaptation.                                | Jonze, Spike           | Spike Jonze           | tt0268126 |
| 1746577218 | 1960 | 1960 | The Night Fighters                         | The Night Fighters                         | Garnett, Tay           | Tay Garnett           | tt0054120 |
| 1746464770 | 1941 | 1941 | Whistling in the Dark                      | Whistling in the Dark                      | Simon, S. Sylvan       | S. Sylvan Simon       | tt0034389 |
| 1746486287 | 1921 | 1921 | A Message From Mars                        | A Message from Mars                        | Karger, Maxwell        | Maxwell Karger        | tt0012456 |
| 1746433768 | 2000 | 1999 | Uninvited Guest                            | Uninvited Guest                            | Folsome, Timothy Wayne | Timothy Wayne Folsome | tt0188694 |
| 1746197921 | 1970 | 1970 | Joe                                        | Joe                                        | Avildsen, John G.      | John G. Avildsen      | tt0065916 |
| 1746582277 | 1929 | 1928 | The Viking                                 | The Viking                                 | Neill, R. William      | Roy William Neill     | tt0019532 |
| 1746454881 | 1997 | 1997 | Dream with the Fishes                      | Dream with the Fishes                      | Taylor, Finn           | Finn Taylor           | tt0119019 |
| 1746210397 | 1971 | 1971 | The Mephisto Waltz                         | The Mephisto Waltz                         | Wendkos, Paul          | Paul Wendkos          | tt0067419 |
| 1746464897 | 1941 | 1941 | The Trail of the Silver Spurs              | Trail of the Silver Spurs                  | Luby, S. Roy           | S. Roy Luby           | tt0034309 |
| 1746493652 | 1911 | 1911 | Bertie's Bandit                            | Bertie's Bandit                            | Beal, Frank            | Frank Beal            | tt0398755 |
| 1746575889 | 1931 | 1931 | Young As You Feel                          | Young as You Feel                          | Borzage, Frank         | Frank Borzage         | tt0022591 |
| 1769971096 | 1969 | 1969 | Passion in Hot Hollows                     | Passion in Hot Hollows                     | Sarno, Joe             | Joseph W. Sarno       | tt0062100 |
| 1746578884 | 1962 | 1962 | The Chapman Report                         | The Chapman Report                         | Cukor, George          | George Cukor          | tt0055841 |
| 1769969552 | 1911 | 1911 | Desperate Desmond Pursued by Claude Eclair | Desperate Desmond Pursued by Claude Eclair |                        | Tom Ricketts          | tt0213606 |
| 1746198541 | 1966 | 1966 | Dr. Goldfoot and the Girl Bombs            | Dr. Goldfoot and the Girl Bombs            | Bava, Mario            | Mario Bava            | tt0061014 |
| 1746570447 | 1953 | 1952 | Road to Bali                               | Road to Bali                               | Walker, Hal            | Hal Walker            | tt0045094 |
| 1746520037 | 1925 | 1925 | Without Mercy                              | Without Mercy                              | Melford, George        | George Melford        | tt0016543 |
| 1746466641 | 1917 | 1917 | Mutiny                                     | Mutiny                                     | Reynolds, Lynn F.      | Lynn Reynolds         | tt0008340 |
| 1746473936 | 1944 | 1944 | Sundown Valley                             | Sundown Valley                             | Kline, Benjamin        | Benjamin H. Kline     | tt0037328 |
| 1746543080 | 1915 | 1916 | The Sins That Ye Sin                       | The Sins That Ye Sin                       | Thayer, Otis B.        | Otis Thayer           | tt0158961 |
| 1746585466 | 1939 | 1939 | Million Dollar Legs                        | Million Dollar Legs                        | Grinde, Nick           | Nick Grinde           | tt0031652 |
| 1746453778 | 1942 | 1942 | A Date with the Falcon                     | A Date with the Falcon                     | Reis, Irving           | Irving Reis           | tt0033517 |
| 1746571410 | 1932 | 1932 | Tombstone Canyon                           | Tombstone Canyon                           | James, Alan            | Alan James            | tt0023604 |
| 1746562205 | 1955 | 1955 | The Kentuckian                             | The Kentuckian                             | Lancaster, Burt        | Burt Lancaster        | tt0048248 |
| 1746248200 | 1967 | 1967 | The Fastest Guitar Alive                   | The Fastest Guitar Alive                   | Moore, Michael         | Michael D. Moore      | tt0061652 |
| 1746581500 | 1928 | 1928 | Triple Pass                                | Triple Pass                                |                        |                       | tt0174282 |
| 1746580325 | 1935 | 1936 | Night Cargo                                | Night Cargo                                | Hutchison, Charles     | Charles Hutchison     | tt0165402 |
| 1746569581 | 1958 | 1958 | The Inn of the Sixth Happiness             | The Inn of the Sixth Happiness             | Robson, Mark           | Mark Robson           | tt0051776 |
| 1746492232 | 1947 | 1947 | The Mighty McGurk                          | The Mighty McGurk                          | Waters, John           | John Waters           | tt0038739 |
| 1746583521 | 1929 | 1929 | Law of the Plains                          | The Law of the Plains                      | McGowan, J. P.         | J.P. McGowan          | tt0020084 |
| 1746513873 | 1915 | 1915 | The Way Back                               | The Way Back                               | King, Carlton          | Carlton S. King       | tt0006247 |
| 1746514078 | 1916 | 1916 | The Clown                                  | The Clown                                  | Mille, William C. de   | William C. de Mille   | tt0006520 |
| 1746514725 | 1915 | 1915 | Pretty Mrs. Smith                          | Pretty Mrs. Smith                          | Bosworth, Hobart       | Hobart Bosworth       | tt0005921 |
| 1746507830 | 1926 | 1926 | The Yellow Back                            | The Yellow Back                            | Andrews, Del           | Del Andrews           | tt0017582 |
| 1746419186 | 1992 | 1992 | Gas, Food Lodging                          | Gas, Food Lodging                          | Anders, Allison        | Allison Anders        | tt0104321 |
| 1746465403 | 1946 | 1946 | Devil Bat's Daughter                       | Devil Bat's Daughter                       | Wisbar, Frank          | Frank Wisbar          | tt0038470 |
| 1746508423 | 1925 | 1925 | The Sign of the Cactus                     | The Sign of the Cactus                     | Smith, Clifford S.     | Clifford Smith        | tt0016349 |
| 1746569963 | 1958 | 1958 | Frankenstein's Daughter                    | Frankenstein's Daughter                    | Cunha, Richard         | Richard E. Cunha      | tt0051631 |
| 1746555552 | 1957 | 1957 | Dragstrip Girl                             | Dragstrip Girl                             | Cahn, Edward L.        | Edward L. Cahn        | tt0050337 |
| 1746554249 | 1964 | 1964 | The Young Lovers                           | The Young Lovers                           | Goldwyn, Samuel        | Samuel Goldwyn Jr.    | tt0058763 |
| 1746508270 | 1925 | 1925 | Win, Lose or Draw                          | Win, Lose or Draw                          | Maloney, Leo           | Leo D. Maloney        | tt0016539 |
| 1746474115 | 1948 | 1948 | The Bold Frontiersman                      | The Bold Frontiersman                      | Ford, Philip           | Philip Ford           | tt0040180 |
| 1745302447 | 2005 | 2004 | Jiminy Glick in Lalawood                   | Jiminy Glick in Lalawood                   | Jean, Vadim            | Vadim Jean            | tt0347369 |
| 1745340833 | 2003 | 2003 | Malibu's Most Wanted                       | Malibu's Most Wanted                       | Whitesell, John        | John Whitesell        | tt0328099 |
| 1746580447 | 1937 | 1937 | The Bride Wore Red                         | The Bride Wore Red                         | Arzner, Dorothy        | Dorothy Arzner        | tt0028661 |
| 1746566201 | 1956 | 1956 | Runaway Daughters                          | Runaway Daughters                          | Cahn, Edward L.        | Edward L. Cahn        | tt0049697 |
| 1746394754 | 1981 | 1981 | Pennies from Heaven                        | Pennies from Heaven                        | Ross, Herbert          | Herbert Ross          | tt0082894 |
| 1746507860 | 1927 | 1927 | Splitting the Breeze                       | Splitting the Breeze                       | De Lacey, Robert       | Robert De Lacey       | tt0018437 |
| 1746455027 | 1996 | 1996 | Michael Collins                            | Michael Collins                            | Jordan, Neil           | Neil Jordan           | tt0117039 |
| 1746581502 | 1960 | 1960 | I Aim at the Stars                         | I Aim at the Stars                         | Thompson, J. Lee       | J. Lee Thompson       | tt0053440 |
| 1746437014 | 1943 | 1943 | The Iron Major                             | The Iron Major                             | Enright, Ray           | Ray Enright           | tt0036044 |
| 1746491957 | 1946 | 1946 | Courage of Lassie                          | Courage of Lassie                          | Wilcox, Fred M.        | Fred M. Wilcox        | tt0038427 |
| 1746394222 | 1990 | 1990 | Nobody's Perfect                           | Nobody's Perfect                           | Kaylor, Robert         | Robert Kaylor         | tt0097994 |
| 1746583478 | 1931 | 1931 | Dishonored                                 | Dishonored                                 | Sternberg, Josef von   | Josef von Sternberg   | tt0021800 |
| 1746573660 | 1931 | 1931 | Forgotten Women                            | Forgotten Women                            | Thorpe, Richard        | Richard Thorpe        | tt0021882 |
| 1746555419 | 1955 | 1955 | Hold Back Tomorrow                         | Hold Back Tomorrow                         | Haas, Hugo             | Hugo Haas             | tt0048174 |

|            |      |      |                               |                               |                                 |                                     |           |
|------------|------|------|-------------------------------|-------------------------------|---------------------------------|-------------------------------------|-----------|
| 1745357603 | 2008 | 2007 | American Zombie               | American Zombie               | Lee, Grace                      | Grace Lee                           | tt0765430 |
| 1746438606 | 1945 | 1945 | Adventures of Rusty           | Adventures of Rusty           | Burnford, Paul                  | Paul Burnford                       | tt0037496 |
| 1746503609 | 1918 | 1918 | After the War                 | After the War                 | De Grasse, Joseph               | Joseph De Grasse                    | tt0009863 |
| 1746520625 | 1925 | 1925 | Hearts of the West            | Hearts of the West            |                                 |                                     | tt0245937 |
| 1746503952 | 1919 | 1919 | The Gray Wolf's Ghost         | The Gray Wolf's Ghost         | Frame, Park                     | Park Frame                          | tt0011252 |
| 1746523726 | 1915 | 1915 | The Model                     | The Model                     | Thomson, Frederick              | Frederick A. Thomson                | tt0005760 |
| 1746560110 | 1964 | 1964 | The Lively Set                | The Lively Set                | Arnold, Jack                    | Jack Arnold                         | tt0058296 |
| 1746554320 | 1964 | 1964 | Back Door to Hell             | Back Door to Hell             | Hellman, Monte                  | Monte Hellman                       | tt0057864 |
| 1746570742 | 1933 | 1933 | Hold Me Tight                 | Hold Me Tight                 | Butler, David                   | David Butler                        | tt0024129 |
| 1746464763 | 1946 | 1946 | Sentimental Journey           | Sentimental Journey           | Lang, Walter                    | Walter Lang                         | tt0038922 |
| 1746437240 | 1940 | 1939 | Two-Fisted Rangers            | Two Fisted Rangers            | Lewis, Joseph H.                | Joseph H. Lewis                     | tt0033195 |
| 1746584300 | 1935 | 1935 | The Wedding Night             | The Wedding Night             | Vidor, King                     | King Vidor                          | tt0027189 |
| 1746492096 | 1944 | 1944 | The Whistler                  | The Whistler                  | Castle, William                 | William Castle                      | tt0037461 |
| 1746514348 | 1914 | 1914 | The Criminal Code             | The Criminal Code             |                                 | William Desmond Taylor              | tt0003802 |
| 1746475513 | 1947 | 1947 | Thunderbolt                   | Thunderbolt                   | Sturges, John; Wyler, William   | John Sturges                        | tt0038171 |
| 1746584880 | 1939 | 1939 | Trouble in Sundown            | Trouble in Sundown            | Howard, David                   | David Howard                        | tt0032060 |
| 1746453836 | 1943 | 1943 | Let's Face It                 | Let's Face It                 | Lanfield, Sidney                | Sidney Lanfield                     | tt0036105 |
| 1746499908 | 1923 | 1923 | The Gentleman From America    | The Gentleman from America    | Sedgwick, Edward                | Edward Sedgwick                     | tt0014078 |
| 1746525093 | 1919 | 1919 | Marked Men                    | Marked Men                    | Ford, Jack                      | John Ford                           | tt0010438 |
| 1745302781 | 2006 | 2006 | Material Girls                | Material Girls                | Coolidge, Martha                | Martha Coolidge                     | tt0433412 |
| 1746524740 | 1910 | 1910 | The Proposal                  | The Proposal                  | Powell, Frank                   | Frank Powell                        | tt0362994 |
| 1746198709 | 1970 | 1970 | The Wizard of Gore            | The Wizard of Gore            | Lewis, Herschell Gordon         | Herschell Gordon Lewis              | tt0066578 |
| 1746585399 | 1939 | 1939 | I Stole a Million             | I Stole a Million             | Tuttle, Frank                   | Frank Tuttle                        | tt0031465 |
| 1746508987 | 1949 | 1949 | Brimstone                     | Brimstone                     | Kane, Joseph                    | Joseph Kane                         | tt0041210 |
| 1746512425 | 1916 | 1916 | The Light                     | The Light                     | Dowlan, William C.              | William C. Dowlan                   | tt0160469 |
| 1746524731 | 1917 | 1917 | Fires of Rebellion            | Fires of Rebellion            | Park, Ida May                   | Ida May Park                        | tt0007950 |
| 1746465377 | 1942 | 1942 | Yokel Boy                     | Yokel Boy                     | Santley, Joseph                 | Joseph Santley                      | tt0035581 |
| 1746501356 | 1915 | 1915 | The Adventures of a Boy Scout | The Adventures of a Boy Scout | Warren, Edward                  | Edward Warren                       | tt0004859 |
| 1746423981 | 1940 | 1940 | British Intelligence          | British Intelligence          | Morse, Terry                    | Terry O. Morse                      | tt0032283 |
| 1746570826 | 1952 | 1952 | Oklahoma Annie                | Oklahoma Annie                | Springsteen, R. G.              | R.G. Springsteen                    | tt0044988 |
| 1746508562 | 1926 | 1926 | The Beautiful Cheat           | The Beautiful Cheat           | Sloman, Edward                  | Edward Sloman                       | tt0016635 |
| 1746581020 | 1910 | 1910 | The Girl and the Fugitive     | The Girl and the Fugitive     |                                 | Gilbert M. 'Broncho Billy' Anderson | tt0001231 |
| 1745357732 | 2003 | 2003 | Flesh for the Beast           | Flesh for the Beast           | West, Terry M.                  | Terry M. West                       | tt0372921 |
| 1746580334 | 1935 | 1935 | Barbary Coast                 | Barbary Coast                 | Hawks, Howard                   | Howard Hawks                        | tt0026097 |
| 1746436544 | 1941 | 1941 | Caught in the Draft           | Caught in the Draft           | Butler, David                   | David Butler                        | tt0033455 |
| 1746574317 | 1951 | 1951 | The Blue Veil                 | The Blue Veil                 | Bernhardt, Curtis               | Curtis Bernhardt                    | tt0043350 |
| 1746497681 | 1922 | 1922 | The Sagebrush Trail           | The Sagebrush Trail           | Thornby, Robert T.              | Robert Thornby                      | tt0013569 |
| 1746584707 | 1930 | 1930 | Let's Go Places               | Let's Go Places               | Strayer, Frank                  | Frank R. Strayer                    | tt0021062 |
| 1746502938 | 1915 | 1915 | The Valley of Lost Hope       | The Valley of Lost Hope       | Fielding, Romaine               | Romaine Fielding                    | tt0006205 |
| 1746583008 | 1939 | 1939 | The Lady and the Mob          | The Lady and the Mob          | Stoloff, Ben                    | Benjamin Stoloff                    | tt0031547 |
| 1746436195 | 1997 | 1997 | Grosse Pointe Blank           | Grosse Pointe Blank           | Armitage, George                | George Armitage                     | tt0119229 |
| 1746569721 | 1955 | 1955 | Many Rivers to Cross          | Many Rivers to Cross          | Rowland, Roy                    | Roy Rowland                         | tt0048350 |
| 1746583741 | 1931 | 1931 | Sunrise Trail                 | Sunrise Trail                 | McCarthy, J. P.                 | John P. McCarthy                    | tt0022450 |
| 1746580629 | 1937 | 1937 | A Girl with Ideas             | A Girl with Ideas             | Simon, S. Sylvan                | S. Sylvan Simon                     | tt0028932 |
| 1746496094 | 1919 | 1919 | The Sundown Trail             | The Sundown Trail             | Sturgeon, Rollin                | Rollin S. Sturgeon                  | tt0010745 |
| 1746582177 | 1930 | 1930 | Slightly Scarlet              | Slightly Scarlet              | Gasnier, Louis; Knopf, Edwin H. | Louis J. Gasnier                    | tt0021393 |
| 1746573994 | 1959 | 1959 | Go, Johnny, Go!               | Go, Johnny, Go!               | Landres, Paul                   | Paul Landres                        | tt0051665 |
| 1746583419 | 1929 | 1929 | New Year's Eve                | New Year's Eve                | Lehrman, Henry                  | Henry Lehrman                       | tt0020216 |
| 1746436799 | 1997 | 1997 | Contact                       | Contact                       | Zemeckis, Robert                | Robert Zemeckis                     | tt0118884 |
| 1746497667 | 1920 | 1920 | Firebrand Trevison            | Firebrand Trevison            | Heffron, Thomas N.              | Thomas N. Heffron                   | tt0011182 |
| 1746408715 | 1987 | 1987 | Blind Date                    | Blind Date                    | Edwards, Blake                  | Blake Edwards                       | tt0092666 |
| 1746560901 | 1932 | 1932 | Isle of Paradise              | Isle of Paradise              | Trego, Charles T.               | Charles T. Trego                    | tt1215530 |
| 1746555241 | 1956 | 1956 | Running Target                | Running Target                | Weinstein, Marvin R.            | Marvin R. Weinstein                 | tt0049698 |
| 1746516351 | 1921 | 1921 | Rip Van Winkle                | Rip Van Winkle                | Lascelle, Ward                  | Edward Ludwieg                      | tt0012627 |
| 1746483202 | 1917 | 1917 | The Iced Bullet               | The Iced Bullet               | Barker, Reginald                | Reginald Barker                     | tt0008131 |
| 1746423000 | 1999 | 1999 | Anna and the King             | Anna and the King             | Tennant, Andy                   | Andy Tennant                        | tt0166485 |
| 1746410562 | 1984 | 1984 | Rhinestone                    | Rhinestone                    | Clark, Bob                      | Bob Clark                           | tt0088001 |

|            |      |      |                                        |                                        |                                |                     |           |
|------------|------|------|----------------------------------------|----------------------------------------|--------------------------------|---------------------|-----------|
| 1746523712 | 1916 | 1916 | The Soul's Cycle                       | The Soul's Cycle                       | Davis, Ulysses                 | Ulysses Davis       | tt0158981 |
| 1746515419 | 1920 | 1920 | Human Collateral                       | Human Collateral                       | Windom, Lawrence C.            | Lawrence C. Windom  | tt0011315 |
| 1746503471 | 1921 | 1921 | The Big Adventure                      | The Big Adventure                      | Eason, Reeves                  | B. Reeves Eason     | tt0011966 |
| 1746436219 | 1992 | 1992 | Candyman                               | Candyman                               | Rose, Bernard                  | Bernard Rose        | tt0103919 |
| 1745293170 | 2007 | 2006 | The Tripper                            | The Tripper                            | Arquette, David                | David Arquette      | tt0760187 |
| 1746513467 | 1914 | 1914 | The Traitor                            | The Traitor                            | Weber, Lois; Smalley, Phillips | Phillips Smalley    | tt0004724 |
| 1769971961 | 1969 | 1969 | The Spy Who Came                       | The Spy Who Came                       | Wertheim, Ron                  | Ron Wertheim        | tt0149101 |
| 1745272633 | 2001 | 2001 | The Man Who Wasn't There               | The Man Who Wasn't There               | Coen, Joel                     | Joel Coen           | tt0243133 |
| 1746524531 | 1915 | 1915 | Mr. Grex of Monte Carlo                | Mr. Grex of Monte Carlo                | Reicher, Frank                 | Frank Reicher       | tt0005781 |
| 1746436362 | 1941 | 1941 | The Lady from Cheyenne                 | The Lady from Cheyenne                 | Lloyd, Frank                   | Frank Lloyd         | tt0033807 |
| 1746581912 | 1951 | 1951 | New Mexico                             | New Mexico                             | Reis, Irving                   | Irving Reis         | tt0043849 |
| 1746583393 | 1931 | 1931 | Little Caesar                          | Little Caesar                          | LeRoy, Mervyn                  | Mervyn LeRoy        | tt0021079 |
| 1746583563 | 1930 | 1930 | Caught Short                           | Caught Short                           | Reisner, Charles F.            | Charles Reisner     | tt0020749 |
| 1746500445 | 1926 | 1926 | Footloose Widows                       | Footloose Widows                       | Del Ruth, Roy                  | Roy Del Ruth        | tt0016893 |
| 1746453527 | 1941 | 1941 | Father Takes a Wife                    | Father Takes a Wife                    | Hively, Jack                   | Jack Hively         | tt0033592 |
| 1746577056 | 1959 | 1959 | Porgy and Bess                         | Porgy and Bess                         | Preminger, Otto                | Otto Preminger      | tt0053182 |
| 1746198279 | 1967 | 1966 | The Vulture                            | The Vulture                            | Huntington, Lawrence           | Lawrence Huntington | tt0062463 |
| 1746423496 | 1995 | 1995 | Blue in the Face                       | Blue in the Face                       | Wang, Wayne; Auster, Paul      | Paul Auster         | tt0112541 |
| 1746566000 | 1953 | 1953 | The Tall Texan                         | The Tall Texan                         | Williams, Elmo                 | Elmo Williams       | tt0046399 |
| 1746516128 | 1922 | 1922 | They're Off                            | They're Off                            | Ford, Francis                  | Francis Ford        | tt0169317 |
| 1746408681 | 1986 | 1986 | True Stories                           | True Stories                           | Byrne, David                   | David Byrne         | tt0092117 |
| 1746454687 | 1946 | 1946 | The Killers                            | The Killers                            | Siodmak, Robert                | Robert Siodmak      | tt0038669 |
| 1746454439 | 1944 | 1943 | Swing Out the Blues                    | Swing Out the Blues                    | St. Clair, Mal                 | Malcolm St. Clair   | tt0037337 |
| 1746516507 | 1920 | 1920 | The Man Who Had Everything             | The Man Who Had Everything             | Green, Alfred E.               | Alfred E. Green     | tt0012439 |
| 1746509554 | 1926 | 1925 | The Lost Trail                         | The Lost Trail                         | McGowan, J. P.                 | J.P. McGowan        | tt0264808 |
| 1746486127 | 1918 | 1918 | With Neatness and Dispatch             | With Neatness and Dispatch             | Davis, William S.              | Will S. Davis       | tt0009821 |
| 1746574412 | 1963 | 1963 | Yellowstone Cubs                       | Yellowstone Cubs                       |                                | Charles L. Draper   | tt0206446 |
| 1746492217 | 1945 | 1945 | The Spider                             | The Spider                             | Webb, Robert                   | Robert D. Webb      | tt0038110 |
| 1746410724 | 1992 | 1991 | Where the Day Takes You                | Where the Day Takes You                | Rocco, Marc                    | Marc Rocco          | tt0105810 |
| 1746584100 | 1936 | 1936 | Cavalry                                | Cavalry                                | Bradbury, Robert N.            | Robert N. Bradbury  | tt0027436 |
| 1746577638 | 1937 | 1937 | Old Louisiana                          | Old Louisiana                          | Willat, I. V.                  | Irvin Willat        | tt0029338 |
| 1746520750 | 1925 | 1925 | One of the Bravest                     | One of the Bravest                     | O'Connor, Frank                | Frank O'Connor      | tt0016183 |
| 1746520461 | 1926 | 1926 | Almost a Lady                          | Almost a Lady                          | Hopper, E. Mason               | E. Mason Hopper     | tt0016597 |
| 1745393704 | 2009 | 2009 | The Boondock Saints II: All Saints Day | The Boondock Saints II: All Saints Day | Duffy, Troy                    | Troy Duffy          | tt1300851 |
| 1746584876 | 1939 | 1939 | South of the Border                    | South of the Border                    | Sherman, George                | George Sherman      | tt0031957 |
| 1769969350 | 1964 | 1965 | The Shocking Sex                       | Shocking Set!?                         |                                | Barry Mahon         | tt2104085 |
| 1746583534 | 1931 | 1931 | Possessed                              | Possessed                              |                                | Clarence Brown      | tt0022276 |
| 1746512411 | 1927 | 1927 | The Fair Co-ed                         | The Fair Co Ed                         | Wood, Sam                      | Sam Wood            | tt0017860 |
| 1745293833 | 2007 | 2007 | Smiley Face                            | Smiley Face                            | Araki, Gregg                   | Gregg Araki         | tt0780608 |
| 1746421056 | 1986 | 1986 | TerrorVision                           | TerrorVision                           | Nicolaou, Ted                  | Ted Nicolaou        | tt0092074 |
| 1746259530 | 1978 | 1978 | Killer of Sheep                        | Killer of Sheep                        | Burnett, Charles               | Charles Burnett     | tt0076263 |
| 1746577083 | 1950 | 1950 | Texas Dynamo                           | Texas Dynamo                           | Nazarro, Ray                   | Ray Nazarro         | tt0043036 |
| 1746563794 | 1951 | 1951 | Slaughter Trail                        | Slaughter Trail                        | Allen, Irving                  | Irving Allen        | tt0044045 |
| 1745340821 | 2004 | 2004 | Birth                                  | Birth                                  | Glazer, Jonathan               | Jonathan Glazer     | tt0337876 |
| 1746585067 | 1928 | 1928 | Beware of Married Men                  | Beware of Married Men                  | Mayo, Archie L.                | Archie Mayo         | tt0018693 |
| 1746580974 | 1959 | 1959 | Terror Is a Man                        | Terror Is a Man                        | De Leon, Gerry                 | Gerardo de Leon     | tt0053344 |
| 1746583532 | 1930 | 1929 | Seven Keys to Baldpate                 | Seven Keys to Baldpate                 | Barker, Reginald               | Reginald Barker     | tt0020388 |
| 1746492484 | 1945 | 1945 | Divorce                                | Divorce                                | Nigh, William                  | William Nigh        | tt0037645 |
| 1746584038 | 1935 | 1935 | Fighting Caballero                     | Fighting Caballero                     | Clifton, Elmer                 | Elmer Clifton       | tt0026349 |
| 1746496861 | 1917 | 1917 | Her Soul's Inspiration                 | Her Soul's Inspiration                 | Conway, Jack                   | Jack Conway         | tt0008083 |
| 1746497649 | 1920 | 1920 | She Couldn't Help It                   | She Couldn't Help It                   | Campbell, Maurice              | Maurice Campbell    | tt0011684 |
| 1746566028 | 1953 | 1953 | Robot Monster                          | Robot Monster                          | Tucker, Phil                   | Phil Tucker         | tt0046248 |
| 1745341627 | 2001 | 2001 | Get Over It                            | Get Over It                            | O'Haver, Tommy                 | Tommy O'Haver       | tt0192071 |
| 1746507877 | 1926 | 1926 | One Minute to Play                     | One Minute to Play                     | Wood, Sam                      | Sam Wood            | tt0017233 |
| 1746467892 | 1917 | 1917 | The Innocent Sinner                    | Innocent Sinners                       | Walsh, R. A.                   | Herman C. Raymaker  | tt0330448 |
| 1746512749 | 1927 | 1927 | Jake the Plumber                       | Jake the Plumber                       | Luddy, Edward I.               | Edward Ludwig       | tt0018035 |
| 1745339896 | 2004 | 2004 | Raise Your Voice                       | Raise Your Voice                       | McNamara, Sean                 | Sean McNamara       | tt0361696 |



|            |      |      |                                     |                                     |                                  |                     |           |
|------------|------|------|-------------------------------------|-------------------------------------|----------------------------------|---------------------|-----------|
| 1746500386 | 1925 | 1925 | Stampede Thunder                    | Stampede Thunder                    | Gibson, Tom                      | Tom Gibson          | tt0166815 |
| 1746250209 | 1978 | 1978 | I Wanna Hold Your Hand              | I Wanna Hold Your Hand              | Zemeckis, Robert                 | Robert Zemeckis     | tt0077714 |
| 1746501915 | 1915 | 1915 | Tiger Bait                          | Tiger Bait                          | Chaudet, L. W.                   |                     | tt1276431 |
| 1746582180 | 1928 | 1928 | Broken Barriers                     | Broken Barriers                     | King, Burton                     | Burton L. King      | tt0018724 |
| 1746235440 | 1971 | 1971 | Honky                               | Honky                               | Graham, William A.               | William A. Graham   | tt0067214 |
| 1746514103 | 1910 | 1910 | White-Doe's Lover                   | White Doe's Lovers                  |                                  | William F. Haddock  | tt2236934 |
| 1746582474 | 1937 | 1937 | 52nd Street                         | 52nd Street                         | Young, Harold                    | Harold Young        | tt0028544 |
| 1746453946 | 1999 | 1999 | October Sky                         | October Sky                         | Johnston, Joe                    | Joe Johnston        | tt0132477 |
| 1746562448 | 1956 | 1956 | The Brass Legend                    | The Brass Legend                    | Oswald, Gerd                     | Gerd Oswald         | tt0049029 |
| 1746500730 | 1949 | 1949 | The Doctor and the Girl             | The Doctor and the Girl             | Bernhardt, Curtis                | Curtis Bernhardt    | tt0041300 |
| 1746410628 | 1982 | 1982 | The Toy                             | The Toy                             | Donner, Richard                  | Richard Donner      | tt0084809 |
| 1746197869 | 1969 | 1969 | Cactus Flower                       | Cactus Flower                       | Saks, Gene                       | Gene Saks           | tt0064117 |
| 1746575058 | 1936 | 1936 | Three Godfathers                    | Three Godfathers                    | Boleslawski, Richard             | Richard Boleslawski | tt0028367 |
| 1746508765 | 1950 | 1950 | Backfire                            | Backfire                            | Sherman, Vincent                 | Vincent Sherman     | tt0042219 |
| 1745340781 | 2002 | 2002 | The Mothman Prophecies              | The Mothman Prophecies              | Pellington, Mark                 | Mark Pellington     | tt0265349 |
| 1746577163 | 1960 | 1960 | Code of Silence                     | Code of Silence                     | Welles, Mel                      | Mel Welles          | tt0050595 |
| 1746233963 | 1966 | 1966 | Mondo Bizarro                       | Mondo Bizarro                       | Hakasomi, Seasu                  | Lee Frost           | tt0188909 |
| 1746466882 | 1917 | 1917 | Love or Justice                     | Love or Justice                     | Edwards, Walter                  | Walter Edwards      | tt0178720 |
| 1746578978 | 1963 | 1963 | In the Cool of the Day              | In the Cool of the Day              | Stevens, Robert                  | Robert Stevens      | tt0057178 |
| 1769971126 | 1969 | 1969 | Childish Things                     | Childish Things                     | Derek, John                      | John Derek          | tt0068407 |
| 1746584692 | 1930 | 1930 | Night Ride                          | The Night Ride                      | Robertson, John S.               | John S. Robertson   | tt0021183 |
| 1746184039 | 1910 | 1910 | The Aspirations of Gerald and Percy | The Aspirations of Gerald and Percy |                                  |                     | tt0398709 |
| 1746533055 | 1916 | 1916 | The Gilded Cage                     | The Gilded Cage                     | Knoles, Harley                   | Harley Knoles       | tt0006716 |
| 1746419598 | 1989 | 1989 | Look Who's Talking                  | Look Who's Talking                  | Heckerling, Amy                  | Amy Heckerling      | tt0097778 |
| 1746249514 | 1976 | 1976 | Hollywood on Trial                  | Hollywood on Trial                  | Helpern, David                   | David Helpern       | tt0074635 |
| 1746473713 | 1942 | 1942 | Smart Alecks                        | Smart Alecks                        | Fox, Wallace                     | Wallace Fox         | tt0035345 |
| 1746504565 | 1921 | 1921 | The Ruse of the Rattler             | The Ruse of the Rattler             | McGowan, J. P.                   | J.P. McGowan        | tt0012639 |
| 1746508489 | 1924 | 1924 | Surging Seas                        | Surging Seas                        | Chapin, James                    | James Chapin        | tt0015382 |
| 1746576967 | 1958 | 1958 | Wolf Dog                            | Wolf Dog                            | Newfield, Sam                    | Sam Newfield        | tt0052401 |
| 1746580577 | 1937 | 1937 | Born Reckless                       | Born Reckless                       | St. Clair, Malcolm               | Malcolm St. Clair   | tt0028651 |
| 1746438487 | 1997 | 1997 | Plan B                              | Plan B                              | Leva, Gary                       | Gary Leva           | tt0119902 |
| 1746508125 | 1926 | 1926 | The Cohens and Kellys               | The Cohens and Kellys               | Pollard, Harry                   | Harry A. Pollard    | tt0016732 |
| 1746514285 | 1916 | 1916 | The Turmoil                         | The Turmoil                         | Jones, Edgar                     | Edgar Jones         | tt0159058 |
| 1745357912 | 2004 | 2004 | When Will I Be Loved                | When Will I Be Loved                | Toback, James                    | James Toback        | tt0396271 |
| 1746454466 | 1941 | 1941 | World Premiere                      | World Premiere                      | Tetzlaff, Ted                    | Ted Tetzlaff        | tt0034402 |
| 1746408498 | 1990 | 1990 | The Two Jakes                       | The Two Jakes                       | Nicholson, Jack                  | Jack Nicholson      | tt0100828 |
| 1746235810 | 1977 | 1977 | New York, New York                  | New York, New York                  | Scorsese, Martin                 | Martin Scorsese     | tt0076451 |
| 1745339970 | 2004 | 2004 | Kill Bill -- Vol. 2                 | Kill Bill: Vol. 2                   | Tarantino, Quentin               | Quentin Tarantino   | tt0378194 |
| 1746501101 | 1915 | 1915 | The Vanderhoff Affair               | The Vanderhoff Affair               | Vignola, Robert G.               | Robert G. Vignola   | tt0006207 |
| 1746554497 | 1965 | 1965 | Goodbye in the Mirror               | Goodbye in the Mirror               | De Hirsch, Storm                 | Storm De Hirsch     | tt0219708 |
| 1745309485 | 2005 | 2005 | Fever Pitch                         | Fever Pitch                         | Farrelly, Peter; Farrelly, Bobby | Bobby Farrelly      | tt0332047 |
| 1746465263 | 1945 | 1945 | Out of the Depths                   | Out of the Depths                   | Lederman, D. Ross                | D. Ross Lederman    | tt0038817 |
| 1746524697 | 1916 | 1916 | The Matrimaniac                     | The Matrimaniac                     | Powell, Paul                     | Paul Powell         | tt0007047 |
| 1746394197 | 1988 | 1988 | Another Woman                       | Another Woman                       | Allen, Woody                     | Woody Allen         | tt0094663 |
| 1746574911 | 1935 | 1935 | Two for Tonight                     | Two for Tonight                     | Tuttle, Frank                    | Frank Tuttle        | tt0027147 |
| 1746566336 | 1958 | 1958 | High School Hellcats                | High School Hellcats                | Bernds, Edward L.                | Edward Berndts      | tt0051725 |
| 1746581799 | 1928 | 1928 | Ships of the Night                  | Ships of the Night                  | Worne, Duke                      | Duke Worne          | tt0020400 |
| 1746466830 | 1917 | 1917 | The Man from Montana                | The Man from Montana                | Marshall, George                 | George Marshall     | tt0008262 |
| 1746563373 | 1952 | 1951 | Birthright                          | Birthright                          | Clifford, Bill                   | Bill Clifford       | tt0211259 |
| 1746584852 | 1929 | 1929 | The College Coquette                | The College Coquette                | Archainbaud, George              | George Archainbaud  | tt0019781 |
| 1746585135 | 1930 | 1930 | Way for a Sailor                    | Way for a Sailor                    |                                  | Sam Wood            | tt0021534 |
| 1746504420 | 1919 | 1919 | Hard Boiled                         | Hard Boiled                         | Schertzinger, Victor L.          | Victor Schertzinger | tt0010209 |
| 1746580517 | 1938 | 1938 | Going Places                        | Going Places                        | Enright, Ray                     | Ray Enright         | tt0030190 |
| 1746567786 | 1933 | 1933 | One Sunday Afternoon                | One Sunday Afternoon                | Roberts, Stephen                 | Stephen Roberts     | tt0024414 |
| 1746550276 | 1954 | 1954 | The Rocket Man                      | The Rocket Man                      | Rudolph, Oscar                   | Oscar Rudolph       | tt0047423 |
| 1746499953 | 1923 | 1923 | The Frame Up                        | The Frame Up                        | Moody, Harry                     | Harry Moody         | tt0357670 |
| 1746579004 | 1959 | 1958 | Intent to Kill                      | Intent to Kill                      | Cardiff, Jack                    | Jack Cardiff        | tt0051781 |

|            |      |      |                                          |                                          |                                   |                       |           |
|------------|------|------|------------------------------------------|------------------------------------------|-----------------------------------|-----------------------|-----------|
| 1746465040 | 1944 | 1944 | When the Lights Go on Again              | When the Lights Go on Again              | Howard, William K.                | William K. Howard     | tt0037459 |
| 1769970804 | 1912 | 1912 | Cardinal Farley's Home-coming            | Cardinal Farley's Home Coming            |                                   |                       | tt1300202 |
| 1745341991 | 2001 | 2001 | ExtremeDays                              | Extremedays                              | Hannah, Eric                      | Eric Hannah           | tt0245891 |
| 1746574921 | 1935 | 1935 | Lawless Range                            | Lawless Range                            | Bradbury, R. N.                   | Robert N. Bradbury    | tt0026614 |
| 1746454698 | 1944 | 1944 | The Girl Who Dared                       | The Girl Who Dared                       | Bretherton, Howard                | Howard Bretherton     | tt0036866 |
| 1746465188 | 1944 | 1944 | Code of the Prairie                      | Code of the Prairie                      | Bennet, Spencer                   | Spencer Gordon Bennet | tt0036717 |
| 1746514382 | 1917 | 1917 | The Frozen Warning                       | The Frozen Warning                       | Eagle, Oscar                      | Oscar Eagle           | tt0175625 |
| 1746513078 | 1922 | 1922 | The Danger Point                         | The Danger Point                         | Ingraham, Lloyd                   | Lloyd Ingraham        | tt0013045 |
| 1746514255 | 1923 | 1923 | The Tie That Binds                       | The Tie That Binds                       | Levering, Joseph                  | Joseph Levering       | tt0014546 |
| 1746235450 | 1972 | 1972 | Children Shouldn't Play with Dead Things | Children Shouldn't Play with Dead Things | Clark, Benjamin                   | Bob Clark             | tt0068370 |
| 1746502084 | 1917 | 1917 | The Field of Honor                       | The Field of Honor                       | Holubar, Allen J.                 | Allen Holubar         | tt0007939 |
| 1746493690 | 1910 | 1910 | The Step-Daughter                        | The Step Daughter                        |                                   |                       | tt1799143 |
| 1746581378 | 1951 | 1951 | The Red Badge of Courage                 | The Red Badge of Courage                 | Huston, John                      | John Huston           | tt0043961 |
| 1746409253 | 1990 | 1990 | Pacific Heights                          | Pacific Heights                          | Schlesinger, John                 | John Schlesinger      | tt0100318 |
| 1746567454 | 1952 | 1952 | The Story of Will Rogers                 | The Story of Will Rogers                 | Curtiz, Michael                   | Michael Curtiz        | tt0045198 |
| 1746532417 | 1910 | 1910 | Transfusion                              | Transfusion                              |                                   | Harry Solter          | tt0201268 |
| 1745373708 | 2009 | 2009 | Shorts                                   | Shorts                                   | Rodriguez, Robert                 | Robert Rodriguez      | tt1100119 |
| 1746419162 | 1940 | 1940 | Who Killed Aunt Maggie?                  | Who Killed Aunt Maggie?                  | Lubin, Arthur                     | Arthur Lubin          | tt0033257 |
| 1746564496 | 1952 | 1952 | Sailor Beware                            | Sailor Beware                            | Walker, Hal                       | Hal Walker            | tt0043989 |
| 1746504790 | 1918 | 1918 | Fedora                                   | Fedora                                   | José, Edward                      | Edward José           | tt0009060 |
| 1746492234 | 1947 | 1947 | The Perils of Pauline                    | The Perils of Pauline                    | Marshall, George                  | George Marshall       | tt0039698 |
| 1746567430 | 1932 | 1932 | The Greeks Had a Word for Them           | The Greeks Had a Word for Them           | Sherman, Lowell                   | Lowell Sherman        | tt0022961 |
| 1746520700 | 1925 | 1925 | Daddy's Gone A-Hunting                   | Daddy's Gone A Hunting                   | Borzage, Frank                    | Frank Borzage         | tt0015722 |
| 1746200203 | 1969 | 1969 | Gaily, Gaily                             | Gaily, Gaily                             | Jewison, Norman                   | Norman Jewison        | tt0064357 |
| 1746524064 | 1923 | 1923 | Refuge                                   | Refuge                                   | Schertzing, Victor                | Victor Schertzing     | tt0014402 |
| 1746570327 | 1933 | 1933 | Double Harness                           | Double Harness                           | Cromwell, John                    | John Cromwell         | tt0023960 |
| 1746492373 | 1944 | 1944 | Lumberjack                               | Lumberjack                               | Selander, Lesley                  | Lesley Selander       | tt0037030 |
| 1746210044 | 1971 | 1971 | Big Jake                                 | Big Jake                                 | Sherman, George                   | George Sherman        | tt0066831 |
| 1746574362 | 1958 | 1958 | Separate Tables                          | Separate Tables                          | Mann, Delbert                     | Delbert Mann          | tt0052182 |
| 1746436237 | 1997 | 1997 | Boogie Nights                            | Boogie Nights                            | Anderson, Paul Thomas             | Paul Thomas Anderson  | tt0118749 |
| 1746520388 | 1927 | 1927 | Roaring Fires                            | Roaring Fires                            | Barringer, A. B.                  | Barry Barringer       | tt0018333 |
| 1746585432 | 1939 | 1939 | Torchy Runs for Mayor                    | Torchy Runs for Mayor                    | McCarey, Ray                      | Ray McCarey           | tt0032045 |
| 1746436580 | 1940 | 1940 | Hullabaloo                               | Hullabaloo                               | Marin, Edwin L.                   | Edwin L. Marin        | tt0032614 |
| 1746503018 | 1927 | 1927 | What Price Love                          | What Price Love?                         | Revier, Harry                     | Harry Revier          | tt0018560 |
| 1745339959 | 2004 | 2004 | The Princess Diaries 2: Royal Engagement | The Princess Diaries 2: Royal Engagement | Marshall, Garry                   | Garry Marshall        | tt0368933 |
| 1746422912 | 1994 | 1993 | Romeo Is Bleeding                        | Romeo Is Bleeding                        | Medak, Peter                      | Peter Medak           | tt0107983 |
| 1746438607 | 1943 | 1943 | The Kid Rides Again                      | The Kid Rides Again                      | Scott, Sherman                    | Sam Newfield          | tt0036074 |
| 1746555468 | 1957 | 1957 | Slim Carter                              | Slim Carter                              | Bartlett, Richard H.              | Richard Bartlett      | tt0050983 |
| 1746532819 | 1916 | 1916 | The Black Sheep of the Family            | The Black Sheep of the Family            | Hunt, Jay                         | Jay Hunt              | tt0006435 |
| 1745374144 | 2004 | 2003 | Overnight                                | Overnight                                | Smith, Mark Brian ; Montana, Tony | Tony Montana          | tt0390336 |
| 1746580921 | 1962 | 1962 | Phaedra                                  | Phaedra                                  | Dassin, Jules                     | Jules Dassin          | tt0056346 |
| 1746532999 | 1923 | 1923 | Flames of Passion                        | Flames of Passion                        | Moody, H. G.                      | Harry Moody           | tt0013132 |
| 1746218933 | 1977 | 1977 | The Bad News Bears in Breaking Training  | The Bad News Bears in Breaking Training  | Pressman, Michael                 | Michael Pressman      | tt0075718 |
| 1746491984 | 1946 | 1946 | Bowery Bombshell                         | Bowery Bombshell                         | Karlson, Phil                     | Phil Karlson          | tt0038378 |
| 1745342257 | 2004 | 2004 | The Girl Next Door                       | The Girl Next Door                       | Greenfield, Luke                  | Luke Greenfield       | tt0265208 |
| 1745293607 | 2004 | 2004 | Word Wars                                | Word Wars                                | Chaikin, Eric ; Petrillo, Julian  | Eric Chaikin          | tt0390632 |
| 1746570609 | 1934 | 1934 | Twentieth Century                        | Twentieth Century                        | Hawks, Howard                     | Howard Hawks          | tt0025919 |
| 1746437422 | 1941 | 1941 | The Devil and Miss Jones                 | The Devil and Miss Jones                 | Wood, Sam                         | Sam Wood              | tt0033533 |
| 1746422920 | 1992 | 1992 | In the Soup                              | In the Soup                              | Rockwell, Alexandre               | Alexandre Rockwell    | tt0104503 |
| 1746524629 | 1916 | 1916 | The Wrong Door                           | The Wrong Door                           | DeHaven, Carter                   | Carter DeHaven        | tt0007595 |
| 1746435696 | 1940 | 1940 | Haunted House                            | Haunted House                            | McGowan, Robert                   | Robert F. McGowan     | tt0032572 |
| 1746513075 | 1923 | 1923 | The Mailman                              | The Mailman                              | Johnson, Emory                    | Emory Johnson         | tt0014238 |
| 1746580617 | 1935 | 1935 | Champagne for Breakfast                  | Champagne for Breakfast                  | Brown, Melville                   | Melville W. Brown     | tt0026194 |
| 1746422130 | 1996 | 1996 | A Family Thing                           | A Family Thing                           | Pearce, Richard                   | Richard Pearce        | tt0116275 |
| 1746455915 | 1996 | 1996 | Bulletproof                              | Bulletproof                              | Dickerson, Ernest                 | Ernest R. Dickerson   | tt0115783 |
| 1746454505 | 1941 | 1941 | Dangerously They Live                    | Dangerously They Live                    | Florey, Robert                    | Robert Florey         | tt0033512 |
| 1746258238 | 1977 | 1977 | The Happy Hooker Goes to Washington      | The Happy Hooker Goes to Washington      | Levey, William A.                 | William A. Levey      | tt0076125 |

|            |      |      |                                 |                                 |                                      |                                     |           |
|------------|------|------|---------------------------------|---------------------------------|--------------------------------------|-------------------------------------|-----------|
| 1746578750 | 1959 | 1959 | The Wreck of the Mary Deare     | The Wreck of the Mary Deare     | Anderson, Michael                    | Michael Anderson                    | tt0053455 |
| 1746256144 | 1979 | 1979 | When a Stranger Calls           | When a Stranger Calls           | Walton, Fred                         | Fred Walton                         | tt0080130 |
| 1746487582 | 1920 | 1920 | The Golden Trail                | The Golden Trail                | Moomaw, L. H.; Hersholt, Jean        | Jean Hersholt                       | tt0012229 |
| 1746582750 | 1939 | 1939 | Jesse James                     | Jesse James                     | King, Henry                          | Henry King                          | tt0031507 |
| 1746422576 | 1993 | 1992 | How U Like Me Now               | How U Like Me Now               | Roberts, Darryl                      | Darryl Roberts                      | tt0107154 |
| 1746582772 | 1935 | 1935 | Frisco Waterfront               | Frisco Waterfront               | Lubin, Arthur                        | Arthur Lubin                        | tt0026386 |
| 1746582653 | 1938 | 1938 | The Painted Trail               | The Painted Trail               | Hill, Robert                         | Robert F. Hill                      | tt0030549 |
| 1746509493 | 1924 | 1924 | The Moral Sinner                | The Moral Sinner                | Ince, Ralph                          | Ralph Ince                          | tt0015149 |
| 1746581279 | 1950 | 1950 | Storm Over Wyoming              | Storm Over Wyoming              | Selander, Lesley                     | Lesley Selander                     | tt0043003 |
| 1746421057 | 1991 | 1991 | Blood in the Face               | Blood in the Face               | Bohlen, Anne; Rafferty, Kevin; Ridge | Anne Bohlen                         | tt0101479 |
| 1746486832 | 1919 | 1919 | Her Kingdom of Dreams           | Her Kingdom of Dreams           | Neilan, Marshall                     | Marshall Neilan                     | tt0010242 |
| 1746235503 | 1974 | 1974 | Cockfighter                     | Cockfighter                     | Hellman, Monte                       | Monte Hellman                       | tt0071338 |
| 1746410382 | 1985 | 1985 | Pale Rider                      | Pale Rider                      | Eastwood, Clint                      | Clint Eastwood                      | tt0089767 |
| 1746235773 | 1977 | 1977 | You Light Up My Life            | You Light Up My Life            | Brooks, Joseph                       | Joseph Brooks                       | tt0076941 |
| 1746516338 | 1920 | 1920 | Husbands and Wives              | Husbands and Wives              | Levering, Joseph                     | Joseph Levering                     | tt0195812 |
| 1746495608 | 1919 | 1919 | Eve in Exile                    | Eve in Exile                    | George, Burton                       | Burton George                       | tt0190385 |
| 1746574814 | 1936 | 1936 | Song of the Trail               | Song of the Trail               | Hopton, Russell                      | Russell Hopton                      | tt0028285 |
| 1746566345 | 1953 | 1953 | Bright Road                     | Bright Road                     | Mayer, Gerald                        | Gerald Mayer                        | tt0045578 |
| 1746437357 | 1941 | 1941 | Life Begins for Andy Hardy      | Life Begins for Andy Hardy      | Seitz, George B.                     | George B. Seitz                     | tt0033832 |
| 1746524898 | 1915 | 1915 | The Glory of Youth              | The Glory of Youth              | Ellis, Robert                        | Robert Ellis                        | tt0005398 |
| 1746554958 | 1964 | 1964 | A House Is Not a Home           | A House Is Not a Home           | Rouse, Russell                       | Russell Rouse                       | tt0058209 |
| 1746504910 | 1920 | 1920 | For Love or Money               | For Love or Money               | King, Burton                         | Burton L. King                      | tt0156967 |
| 1746514547 | 1916 | 1916 | The Martyrdom of Philip Strong  | The Martyrdom of Philip Strong  | Ridgely, Richard                     | Richard Ridgely                     | tt0163094 |
| 1746513830 | 1922 | 1922 | The Face Between                | The Face Between                | Veiller, Bayard                      | Bayard Veiller                      | tt0013108 |
| 1746513457 | 1910 | 1910 | Trailed to the Hills            | Trailed to the Hills            | Anderson, G. M.                      | Gilbert M. 'Broncho Billy' Anderson | tt0324304 |
| 1746497272 | 1922 | 1922 | Tess of the Storm Country       | Tess of the Storm Country       | Robertson, John S.                   | John S. Robertson                   | tt0013662 |
| 1746409439 | 1983 | 1983 | D.C. Cab                        | D.C. Cab                        | Schumacher, Joel                     | Joel Schumacher                     | tt0085387 |
| 1746501367 | 1910 | 1910 | The Song That Reached His Heart | The Song That Reached His Heart | Dawley (?), J. Searle                | J. Searle Dawley                    | tt1499694 |
| 1746509549 | 1924 | 1924 | Trucker's Top Hand              | Trucker's Top Hand              | Hart, Neal                           | Neal Hart                           | tt0174286 |
| 1746438431 | 1942 | 1942 | Boss of Hangtown Mesa           | Boss of Hangtown Mesa           | Lewis, Joseph H.                     | Joseph H. Lewis                     | tt0034544 |
| 1746524684 | 1917 | 1917 | Hinton's Double                 | Hinton's Double                 | Warde, Ernest                        | Lloyd Lonergan                      | tt0175736 |
| 1746563374 | 1952 | 1952 | Meet Danny Wilson               | Meet Danny Wilson               | Pevney, Joseph                       | Joseph Pevney                       | tt0044893 |
| 1745395368 | 2009 | 2009 | Julie & Julia                   | Julie & Julia                   | Ephron, Nora                         | Nora Ephron                         | tt1135503 |
| 1746566204 | 1953 | 1953 | Laughing Anne                   | Laughing Anne                   | Wilcox, Herbert                      | Herbert Wilcox                      | tt0045989 |
| 1746577561 | 1933 | 1933 | Parole Girl                     | Parole Girl                     | Cline, Edward                        | Edward F. Cline                     | tt0024429 |
| 1746582049 | 1930 | 1930 | Playboy of Paris                | Playboy of Paris                | Berger, Ludwig                       | Ludwig Berger                       | tt0021261 |
| 1746464811 | 1945 | 1945 | Incendiary Blonde               | Incendiary Blonde               | Marshall, George                     | George Marshall                     | tt0037816 |
| 1746574818 | 1935 | 1935 | Behind the Green Lights         | Behind the Green Lights         | Cabanne, Christy                     | Christy Cabanne                     | tt0026106 |
| 1746509462 | 1925 | 1925 | Queen of Spades                 | Queen of Spades                 | Fraser, Harry L.                     | Harry L. Fraser                     | tt0016255 |
| 1746465021 | 1947 | 1947 | Law of the Lash                 | Law of the Lash                 | Taylor, Ray                          | Ray Taylor                          | tt0039559 |
| 1746499934 | 1948 | 1948 | Waterfront at Midnight          | Waterfront at Midnight          | Berke, William                       | William Berke                       | tt0040951 |
| 1746574104 | 1963 | 1963 | Hallelujah the Hills            | Hallelujah the Hills            | Mekas, Adolfas                       | Adolfas Mekas                       | tt0056053 |
| 1746500606 | 1950 | 1950 | It's a Small World              | It's a Small World              | Castle, William                      | William Castle                      | tt0042608 |
| 1746583735 | 1931 | 1931 | Personal Maid                   | Personal Maid                   | Bell, Monta                          | Monta Bell                          | tt0022262 |
| 1746582983 | 1940 | 1940 | Sky Bandits                     | Sky Bandits                     | Staub, Ralph                         | Ralph Staub                         | tt0033058 |
| 1746410179 | 1981 | 1981 | Buddy Buddy                     | Buddy Buddy                     | Wilder, Billy                        | Billy Wilder                        | tt0082111 |
| 1746198091 | 1968 | 1968 | Love Is Where It's At           | Love Is Where It's At           | Knight, Sidney                       | Sidney Knight                       | tt0125861 |
| 1746577864 | 1936 | 1936 | Kelly of the Secret Service     | Kelly of the Secret Service     | Hill, Bob                            | Robert F. Hill                      | tt0027839 |
| 1746436374 | 1943 | 1943 | Devil Riders                    | Devil Riders                    | Newfield, Sam                        | Sam Newfield                        | tt0035804 |
| 1746434604 | 1999 | 1999 | Outside Providence              | Outside Providence              | Corrente, Michael                    | Michael Corrente                    | tt0125971 |
| 1746520963 | 1950 | 1950 | The Missourians                 | The Missourians                 | Blair, George                        | George Blair                        | tt0042741 |
| 1746581800 | 1910 | 1910 | His Sick Friend                 | His Sick Friend                 |                                      | Harry Solter                        | tt0200705 |
| 1746420207 | 1981 | 1981 | Neighbors                       | Neighbors                       | Avildsen, John G.                    | John G. Avildsen                    | tt0082801 |
| 1746437424 | 1941 | 1941 | Stick to Your Guns              | Stick to Your Guns              | Selander, Lesley                     | Lesley Selander                     | tt0034233 |
| 1746509021 | 1924 | 1924 | Troubles of a Bride             | Troubles of a Bride             | Buckingham, Thomas                   | Tom Buckingham                      | tt0016458 |
| 1746580692 | 1937 | 1937 | Black Legion                    | Black Legion                    | Mayo, Archie L.                      | Archie Mayo                         | tt0027367 |
| 1746530762 | 1950 | 1950 | Last of the Buccaneers          | Last of the Buccaneers          | Landers, Lew                         | Lew Landers                         | tt0042666 |

|            |      |      |                                  |                                  |                                              |                        |           |
|------------|------|------|----------------------------------|----------------------------------|----------------------------------------------|------------------------|-----------|
| 1746508060 | 1926 | 1926 | Poker Faces                      | Poker Faces                      | Pollard, Harry A.                            | Harry A. Pollard       | tt0017272 |
| 1746554765 | 1965 | 1965 | The Love Goddesses               | The Love Goddesses               |                                              | Saul J. Turell         | tt0059402 |
| 1746523455 | 1916 | 1916 | The Parson of Panamint           | The Parson of Panamint           | Taylor, William D.                           | William Desmond Taylor | tt0007154 |
| 1746423347 | 1993 | 1993 | Point of No Return               | Point of No Return               | Badham, John                                 | John Badham            | tt0107843 |
| 1746580480 | 1939 | 1939 | Midnight                         | Midnight                         | Leisen, Mitchell                             | Mitchell Leisen        | tt0031647 |
| 1746465100 | 1943 | 1943 | They Got Me Covered              | They Got Me Covered              | Butler, David                                | David Butler           | tt0036427 |
| 1746500342 | 1925 | 1925 | Ridin' Easy                      | Ridin' Easy                      | Hayes, Ward                                  | Ward Hayes             | tt0156954 |
| 1746500504 | 1923 | 1923 | Human Wreckage                   | Human Wreckage                   | Wray, John Griffith                          | John Griffith Wray     | tt0014141 |
| 1746501369 | 1917 | 1917 | Babbling Tongues                 | Babbling Tongues                 | Humphrey, William J.                         | William Humphrey       | tt0167013 |
| 1746578438 | 1960 | 1960 | The Savage Eye                   | The Savage Eye                   | Maddow, Ben; Meyers, Sidney; Strickland, Ben | Ben Maddow             | tt0054270 |
| 1746583086 | 1939 | 1939 | I'm from Missouri                | I'm from Missouri                | Reed, Theodore                               | Theodore Reed          | tt0031469 |
| 1746582752 | 1939 | 1939 | Code of the Fearless             | Code of the Fearless             | Johnson, Raymond K.                          | Bernard B. Ray         | tt0031165 |
| 1746508907 | 1925 | 1925 | The Denial                       | The Denial                       | Henley, Hobart                               | Hobart Henley          | tt0015743 |
| 1746484717 | 1917 | 1917 | The Greater Law                  | The Greater Law                  | Reynolds, Lynn F.                            | Lynn Reynolds          | tt0008032 |
| 1746500308 | 1925 | 1925 | Goat Getter                      | Goat Getter                      | Rogell, Albert                               | Albert S. Rogell       | tt0133807 |
| 1746394027 | 1986 | 1986 | Crossroads                       | Crossroads                       | Hill, Walter                                 | Walter Hill            | tt0090888 |
| 1746580880 | 1934 | 1934 | Girl in Danger                   | Girl in Danger                   | Lederman, D. Ross                            | D. Ross Lederman       | tt0025174 |
| 1746584451 | 1930 | 1930 | Good News                        | Good News                        | Grinde, Nick                                 | Nick Grinde            | tt0020929 |
| 1746554532 | 1964 | 1964 | Viva Las Vegas                   | Viva Las Vegas                   | Sidney, George                               | George Sidney          | tt0058725 |
| 1746542646 | 1926 | 1926 | Race Wild                        | Race Wild                        | Apfel, Oscar                                 | Oscar Apfel            | tt0017302 |
| 1746574966 | 1937 | 1937 | Wells Fargo                      | Wells Fargo                      | Lloyd, Frank                                 | Frank Lloyd            | tt0029752 |
| 1746502866 | 1916 | 1916 | Charity                          | Charity                          | Powell, Frank                                | Frank Powell           | tt0157456 |
| 1746520393 | 1924 | 1924 | The Ridin' Kid From Powder River | The Ridin' Kid from Powder River | Sedgwick, Edward                             | Edward Sedgwick        | tt0015279 |
| 1746584814 | 1930 | 1930 | Animal Crackers                  | Animal Crackers                  | Heerman, Victor                              | Victor Heerman         | tt0020640 |
| 1746199491 | 1969 | 1969 | House of the Red Dragon          | The House of the Red Dragon      | Donne, John                                  | Donn Greer             | tt0220542 |
| 1746524673 | 1922 | 1922 | Flaming Hearts                   | Flaming Hearts                   | Elfelt, Clifford S.                          | Clifford S. Elfelt     | tt0132959 |
| 1746500510 | 1927 | 1927 | The Show Girl                    | The Show Girl                    | Hunt, Charles J.                             | Charles J. Hunt        | tt0134097 |
| 1746549953 | 1954 | 1954 | A Bullet Is Waiting              | A Bullet Is Waiting              | Farrow, John                                 | John Farrow            | tt0046812 |
| 1745357624 | 2010 | 2010 | Countdown to Zero                | Countdown to Zero                | Walker, Lucy                                 | Lucy Walker            | tt1572769 |
| 1746524560 | 1914 | 1914 | Aristocracy                      | Aristocracy                      | Heffron, T. N.                               | Thomas N. Heffron      | tt0003631 |
| 1746424374 | 1940 | 1940 | The Wildcat of Tucson            | The Wildcat of Tucson            | Hillyer, Lambert                             | Lambert Hillyer        | tt0034395 |
| 1746580196 | 1936 | 1936 | The Country Beyond               | The Country Beyond               | Forde, Eugene                                | Eugene Forde           | tt0027467 |
| 1746524643 | 1915 | 1915 | The Magic Skin                   | The Magic Skin                   | Ridgely, Richard                             | Richard Ridgely        | tt0005685 |
| 1746582479 | 1939 | 1939 | Main Street Lawyer               | Main Street Lawyer               | Murphy, Dudley                               | Dudley Murphy          | tt0031607 |
| 1746454958 | 1941 | 1941 | The Body Disappears              | The Body Disappears              | Lederman, D. Ross                            | D. Ross Lederman       | tt0033414 |
| 1746393988 | 1988 | 1988 | Mystic Pizza                     | Mystic Pizza                     | Petrie, Donald                               | Donald Petrie          | tt0095690 |
| 1746464891 | 1941 | 1941 | The Great Train Robbery          | The Great Train Robbery          | Kane, Joseph                                 | Joseph Kane            | tt0033680 |
| 1746584343 | 1940 | 1940 | Arizona                          | Arizona                          | Ruggles, Wesley                              | Wesley Ruggles         | tt0032221 |
| 1746581723 | 1928 | 1928 | The Singapore Mutiny             | The Singapore Mutiny             | Ince, Ralph                                  | Ralph Ince             | tt0164889 |
| 1746492244 | 1948 | 1947 | Dangerous Years                  | Dangerous Years                  | Pierson, Arthur                              | Arthur Pierson         | tt0040267 |
| 1746580235 | 1938 | 1938 | Garden of the Moon               | Garden of the Moon               | Berkeley, Busby                              | Busby Berkeley         | tt0030171 |
| 1746524255 | 1915 | 1915 | Crooky                           | Crooky                           | Williams, C. Jay                             | C. J. Williams         | tt0005159 |
| 1746583544 | 1951 | 1951 | Al Jennings of Oklahoma          | Al Jennings of Oklahoma          | Nazarro, Ray                                 | Ray Nazarro            | tt0043272 |
| 1746574340 | 1959 | 1959 | T-Bird Gang                      | T Bird Gang                      | Harbinger, Richard                           | Richard Harbinger      | tt0163315 |
| 1746501843 | 1915 | 1915 | Jimmy                            | Jimmy                            | Oliver, Guy                                  |                        | tt1268230 |
| 1746455885 | 1999 | 1999 | 8MM                              | 8MM                              | Schumacher, Joel                             | Joel Schumacher        | tt0134273 |
| 1746503806 | 1918 | 1918 | Good-Bye, Bill                   | Good Bye, Bill                   | Emerson, John                                | John Emerson           | tt0010185 |
| 1746566146 | 1954 | 1954 | Challenge the Wild               | Challenge the Wild               | Graham, Frank A.                             | Frank A. Graham        | tt0186915 |
| 1746585395 | 1940 | 1940 | Remember the Night               | Remember the Night               | Leisen, Mitchell                             | Mitchell Leisen        | tt0032981 |
| 1746533035 | 1928 | 1928 | Manhattan Cowboy                 | Manhattan Cowboy                 | McGowan, J. P.                               | J. P. McGowan          | tt0019137 |
| 1746585292 | 1928 | 1928 | Lonesome                         | Lonesome                         | Fejos, Paul                                  | Pál Fejös              | tt0019109 |
| 1746473680 | 1945 | 1945 | Duffy's Tavern                   | Duffy's Tavern                   | Walker, Hal                                  | Hal Walker             | tt0037662 |
| 1746524491 | 1922 | 1922 | False Fronts                     | False Fronts                     | Bradley, Samuel R.                           | Samuel R. Bradley      | tt0013115 |
| 1746580623 | 1938 | 1938 | Come On, Leathernecks            | Come On, Leathernecks!           | Cruze, James                                 | James Cruze            | tt0030005 |
| 1746567802 | 1932 | 1932 | Afraid to Talk                   | Afraid to Talk                   | Cahn, Edward L.                              | Edward L. Cahn         | tt0022612 |
| 1746574969 | 1934 | 1934 | All of Me                        | All of Me                        | Flood, James                                 | James Flood            | tt0024822 |
| 1746583557 | 1929 | 1929 | The Dance of Life                | The Dance of Life                | Cromwell, John; Sutherland, A. Edw.          | John Cromwell          | tt0019798 |

|            |      |      |                                                |                                             |                                |                      |           |
|------------|------|------|------------------------------------------------|---------------------------------------------|--------------------------------|----------------------|-----------|
| 1746577606 | 1936 | 1936 | The Big Broadcast of 1937                      | The Big Broadcast of 1937                   | Leisen, Mitchell               | Mitchell Leisen      | tt0027356 |
| 1746500196 | 1950 | 1950 | Kansas Raiders                                 | Kansas Raiders                              | Enright, Ray                   | Ray Enright          | tt0042629 |
| 1746560515 | 1932 | 1932 | Partners                                       | Partners                                    | Allen, Fred                    | Fred Allen           | tt0023321 |
| 1746423303 | 1999 | 1998 | The Taxman                                     | Taxman                                      | Nesher, Avi                    | Avi Nesher           | tt0138862 |
| 1745359123 | 2003 | 2003 | Terminator 3: Rise of the Machines             | Terminator 3: Rise of the Machines          | Mostow, Jonathan               | Jonathan Mostow      | tt0181852 |
| 1746516080 | 1921 | 1921 | Pilgrims of the Night                          | Pilgrims of the Night                       | Sloman, Edward                 | Edward Sloman        | tt0012567 |
| 1769973326 | 1970 | 1969 | The Master Piece                               | The Master Piece!                           | Van Horn, Lee                  | Lee Van Horn         | tt0379374 |
| 1746467884 | 1917 | 1917 | The Spirit of Romance                          | The Spirit of Romance                       | Hopper, E. Mason               | E. Mason Hopper      | tt0182445 |
| 1746492481 | 1944 | 1944 | One Body Too Many                              | One Body Too Many                           | McDonald, Frank                | Frank McDonald       | tt0037151 |
| 1746576620 | 1931 | 1931 | High Stakes                                    | High Stakes                                 | Sherman, Lowell                | Lowell Sherman       | tt0021959 |
| 1746581626 | 1928 | 1928 | Riley of the Rainbow Division                  | Riley of the Rainbow Division               | Ray, Robert                    | Bobby Ray            | tt0156963 |
| 1746420399 | 1991 | 1991 | Dead Again                                     | Dead Again                                  | Branagh, Kenneth               | Kenneth Branagh      | tt0101669 |
| 1746584877 | 1940 | 1940 | The Ghost Breakers                             | The Ghost Breakers                          | Marshall, George               | George Marshall      | tt0032520 |
| 1746234788 | 1968 | 1968 | Psych-Out                                      | Psych Out                                   | Rush, Richard                  | Richard Rush         | tt0063469 |
| 1746465157 | 1947 | 1947 | Dick Tracy Meets Gruesome                      | Dick Tracy Meets Gruesome                   | Rawlins, John                  | John Rawlins         | tt0039320 |
| 1746218992 | 1975 | 1974 | The Yakuza                                     | The Yakuza                                  | Pollack, Sydney                | Sydney Pollack       | tt0073918 |
| 1746434924 | 1995 | 1995 | Jupiter's Wife                                 | Jupiter's Wife                              | Negroponde, Michel             | Michel Negroponde    | tt0110217 |
| 1746585241 | 1929 | 1929 | Marianne                                       | Marianne                                    | Leonard, Robert Z.             | Robert Z. Leonard    | tt0020143 |
| 1746582910 | 1936 | 1936 | Ceiling Zero                                   | Ceiling Zero                                | Hawks, Howard                  | Howard Hawks         | tt0026191 |
| 1746570989 | 1934 | 1934 | No Contest!                                    | No Contest!                                 | Henabery, Joseph               | Joseph Henabery      | tt0026783 |
| 1746419922 | 1988 | 1988 | The Naked Gun: From the Files of Police Squad! | The Naked Gun: From the Files of Police Squ | Zucker, David                  | David Zucker         | tt0095705 |
| 1746393560 | 1981 | 1981 | Ragtime                                        | Ragtime                                     | Forman, Milos                  | Milos Forman         | tt0082970 |
| 1746569967 | 1958 | 1958 | Badman's Country                               | Badman's Country                            | Sears, Fred F.                 | Fred F. Sears        | tt0051394 |
| 1746577655 | 1935 | 1935 | Folies Bergère de Paris                        | Folies Bergère de Paris                     | Del Ruth, Roy                  | Roy Del Ruth         | tt0026373 |
| 1746565214 | 1952 | 1952 | The Winning Team                               | The Winning Team                            | Seiler, Lewis                  | Lewis Seiler         | tt0045332 |
| 1746420047 | 1993 | 1993 | Fatal Instinct                                 | Fatal Instinct                              | Reiner, Carl                   | Carl Reiner          | tt0106873 |
| 1746583918 | 1930 | 1930 | Peacock Alley                                  | Peacock Alley                               | De Sano, Marcel                | Marcel De Sano       | tt0021243 |
| 1746582744 | 1935 | 1935 | Going Highbrow                                 | Going Highbrow                              | Florey, Robert                 | Robert Florey        | tt0026420 |
| 1746410760 | 1982 | 1982 | Richard Pryor Live on the Sunset Strip         | Richard Pryor: Live on the Sunset Strip     | Layton, Joe                    | Joe Layton           | tt0084597 |
| 1746453567 | 1943 | 1943 | Confessions of a Vice Baron                    | Confessions of a Vice Baron                 | Melville, John                 | S. Roy Luby          | tt0173742 |
| 1746484164 | 1919 | 1919 | The Spirit of Lafayette                        | The Spirit of Lafayette                     | Vincent, James                 | James Vincent        | tt0008618 |
| 1746584037 | 1938 | 1938 | Man's Country                                  | Man's Country                               | Hill, Robert                   | Robert F. Hill       | tt0030411 |
| 1745359571 | 2001 | 2001 | Down to Earth                                  | Down to Earth                               | Weitz, Chris; Weitz, Paul      | Chris Weitz          | tt0231775 |
| 1746569743 | 1957 | 1957 | The Land Unknown                               | The Land Unknown                            | Vogel, Virgil                  | Virgil W. Vogel      | tt0050622 |
| 1746583863 | 1930 | 1930 | Lord Byron of Broadway                         | Lord Byron of Broadway                      | Nigh, William; Beaumont, Harry | Harry Beaumont       | tt0021090 |
| 1746520570 | 1926 | 1926 | Devil's Dice                                   | Devil's Dice                                | Forman, Tom                    | Tom Forman           | tt0016784 |
| 1746513800 | 1912 | 1912 | A Physician's Honor                            | The Physician's Honor                       |                                |                      | tt0358021 |
| 1746393962 | 1992 | 1992 | Prelude to a Kiss                              | Prelude to a Kiss                           | René, Norman                   | Norman René          | tt0105165 |
| 1746500254 | 1926 | 1926 | The Road to Mandalay                           | The Road to Mandalay                        | Browning, Tod                  | Tod Browning         | tt0017329 |
| 1746502285 | 1916 | 1916 | Insomnia                                       | Insomnia                                    | Metcalfe, Earl                 | Earl Metcalfe        | tt0483668 |
| 1746574816 | 1937 | 1937 | Arizona Days                                   | Arizona Days                                | English, John                  | John English         | tt0028582 |
| 1746582033 | 1928 | 1928 | Prowlers of the Sea                            | Prowlers of the Sea                         | Adolfi, John G.                | John G. Adolfi       | tt0019296 |
| 1746580771 | 1935 | 1935 | Diamond Jim                                    | Diamond Jim                                 | Sutherland, A. Edward          | A. Edward Sutherland | tt0026277 |
| 1746487370 | 1920 | 1920 | The Last Straw                                 | The Last Straw                              | Clift, Denison                 | Denison Clift        | tt0011386 |
| 1746580314 | 1938 | 1938 | Six Shootin' Sheriff                           | Six Shootin' Sheriff                        | Fraser, Harry                  | Harry L. Fraser      | tt0030757 |
| 1746455290 | 1995 | 1995 | Man of the House                               | Man of the House                            | Orr, James                     | James Orr            | tt0113755 |
| 1746497579 | 1920 | 1920 | Down Home                                      | Down Home                                   | Willat, Irvin V.               | Irvin Willat         | tt0011127 |
| 1746577605 | 1934 | 1934 | I Believed in You                              | I Believed in You                           | Cummings, Irving               | Irving Cummings      | tt0025280 |
| 1746424196 | 1943 | 1943 | Assignment in Brittany                         | Assignment in Brittany                      | Conway, Jack                   | Jack Conway          | tt0035651 |
| 1746584505 | 1928 | 1928 | Domestic Meddlers                              | Domestic Meddlers                           | Flood, James                   | James Flood          | tt0018842 |
| 1746578381 | 1961 | 1961 | Lover Come Back                                | Lover Come Back                             | Mann, Delbert                  | Delbert Mann         | tt0055100 |
| 1746474538 | 1944 | 1944 | Forty Thieves                                  | Forty Thieves                               | Selander, Lesley               | Lesley Selander      | tt0036835 |
| 1746464939 | 1944 | 1944 | The Climax                                     | The Climax                                  | Waggnar, George                | George Waggnar       | tt0036715 |
| 1746504154 | 1917 | 1917 | The Woman and the Beast                        | The Woman and the Beast                     | Warde, Ernest C.               | Ernest C. Warde      | tt0176328 |
| 1746393546 | 1983 | 1983 | All the Right Moves                            | All the Right Moves                         | Chapman, Michael               | Michael Chapman      | tt0085154 |
| 1746579055 | 1960 | 1960 | The Bramble Bush                               | The Bramble Bush                            | Petrie, Daniel                 | Daniel Petrie        | tt0053673 |
| 1746554478 | 1964 | 1964 | Flight From Ashiya                             | Flight from Ashiya                          | Anderson, Michael              | Michael Anderson     | tt0058104 |

|                   |             |             |                                    |                                    |                                  |                                     |                  |
|-------------------|-------------|-------------|------------------------------------|------------------------------------|----------------------------------|-------------------------------------|------------------|
| 1746577004        | 1950        | 1950        | Young Man with a Horn              | Young Man with a Horn              | Curtiz, Michael                  | Michael Curtiz                      | tt0043153        |
| 1746392760        | 1984        | 1984        | Ninja III: The Domination          | Ninja III: The Domination          | Firstenberg, Sam                 | Sam Firstenberg                     | tt0087805        |
| 1746581433        | 1910        | 1910        | A Gambler of the West              | A Gambler of the West              |                                  | Gilbert M. 'Broncho Billy' Anderson | tt0001228        |
| 1746424220        | 1942        | 1941        | "Kukan": The Battle Cry of China   | 'Kukan': The Battle Cry of China   |                                  |                                     | tt0121453        |
| 1746524327        | 1923        | 1923        | At Devil's Gorge                   | At Devil's Gorge                   | Dearholt, Ashton                 | Ashton Dearholt                     | tt0013844        |
| 1746584949        | 1939        | 1939        | Death Goes North                   | Death Goes North                   | McDonald, Frank                  | Frank McDonald                      | tt0031220        |
| 1746582941        | 1939        | 1939        | They Made Me a Criminal            | They Made Me a Criminal            | Berkeley, Busby                  | Busby Berkeley                      | tt0032022        |
| 1746580524        | 1935        | 1935        | Pals of the Range                  | Pals of the Range                  | Clifton, Elmer                   | Elmer Clifton                       | tt0026843        |
| 1769971121        | 1969        | 1969        | The Secret Life of Hernando Cortez | The Secret Life of Hernando Cortez | Chamberlain, John                | John Chamberlain                    | tt0064951        |
| 1746584082        | 1935        | 1935        | Trail of Terror                    | Trail of Terror                    | Bradbury, Robert N.              | Robert N. Bradbury                  | tt0027128        |
| 1746569899        | 1958        | 1958        | From Hell to Texas                 | From Hell to Texas                 | Hathaway, Henry                  | Henry Hathaway                      | tt0051636        |
| 1746513068        | 1927        | 1927        | Wild Beauty                        | Wild Beauty                        | MacRae, Henry                    | Henry MacRae                        | tt0018575        |
| 1746574483        | 1934        | 1934        | Two Alone                          | Two Alone                          | Nugent, Elliott                  | Elliott Nugent                      | tt0025923        |
| 1746500705        | 1925        | 1925        | The Way of a Girl                  | The Way of a Girl                  | Vignola, Robert G.               | Robert G. Vignola                   | tt0016505        |
| 1746584158        | 1939        | 1939        | Honolulu                           | Honolulu                           | Buzzell, Edward                  | Edward Buzzell                      | tt0031442        |
| 1746571336        | 1952        | 1952        | The Las Vegas Story                | The Las Vegas Story                | Stevenson, Robert                | Robert Stevenson                    | tt0044825        |
| 1746573929        | 1962        | 1962        | The Couch                          | The Couch                          | Crump, Owen                      | Owen Crump                          | tt0055870        |
| 1746576933        | 1962        | 1961        | Forbid Them Not                    | Forbid Them Not                    | Kimble, Robert L.                | Robert L. Kimble                    | tt0054888        |
| 1745341997        | 2001        | 2001        | Enemy at the Gates                 | Enemy at the Gates                 | Annaud, Jean-Jacques             | Jean                                | tt0215750        |
| 1746530689        | 1950        | 1950        | Cow Town                           | Cow Town                           | English, John                    | John English                        | tt0042349        |
| 1745340824        | 2003        | 2003        | The Lizzie McGuire Movie           | The Lizzie McGuire Movie           | Fall, Jim                        | Jim Fall                            | tt0306841        |
| 1746576695        | 1931        | 1931        | The Naughty Flirt                  | The Naughty Flirt                  | Cline, Edward                    | Edward F. Cline                     | tt0022191        |
| 1746569815        | 1957        | 1956        | The Wrong Man                      | The Wrong Man                      | Hitchcock, Alfred                | Alfred Hitchcock                    | tt0051207        |
| 1746520382        | 1925        | 1925        | Wild Horse Canyon                  | Wild Horse Canyon                  |                                  | Ben F. Wilson                       | tt0016533        |
| 1746501943        | 1915        | 1915        | Helène of the North                | Helene of the North                | Dawley, J. Searle                | J. Searle Dawley                    | tt0005464        |
| 1746420100        | 1988        | 1988        | The Presidio                       | The Presidio                       | Hyams, Peter                     | Peter Hyams                         | tt0095897        |
| 1746562126        | 1957        | 1958        | Half Human                         | Half Human                         | G. Crane, Kenneth                | Kenneth G. Crane                    | tt0050480        |
| 1746494004        | 1914        | 1914        | Absinthe                           | Absinthe                           | Brenon, Herbert                  | Herbert Brenon                      | tt0003591        |
| 1746424618        | 1943        | 1943        | Cabin in the Sky                   | Cabin in the Sky                   | Minnelli, Vincente               | Vincente Minnelli                   | tt0035703        |
| 1746210807        | 1970        | 1969        | Latitude Zero                      | Latitude Zero                      | Honda, Ishiro                    | Ishirô Honda                        | tt0064470        |
| 1746582795        | 1939        | 1939        | Exile Express                      | Exile Express                      | Garrett, Otis                    | Otis Garrett                        | tt0031288        |
| 1746530777        | 1949        | 1949        | Rio Grande                         | Rio Grande                         | Sheldon, Norman                  | Norman Sheldon                      | tt0244170        |
| 1746585159        | 1929        | 1929        | Girls Gone Wild                    | Girls Gone Wild                    | Seiler, Lewis                    | Lewis Seiler                        | tt0019931        |
| 1746582818        | 1936        | 1936        | The Magnificent Brute              | Magnificent Brute                  | Blystone, John                   | John G. Blystone                    | tt0027930        |
| 1746577203        | 1960        | 1960        | Walk Tall                          | Walk Tall                          | Dexter, Maury                    | Maury Dexter                        | tt0054458        |
| 1769977804        | 1985        | 1985        | The Heavenly Kid                   | The Heavenly Kid                   | Medoway, Cary                    | Cary Medoway                        | tt0089265        |
| 1746577526        | 1937        | 1937        | Nation Aflame                      | Nation Aflame                      | Halperin, Victor                 | Victor Halperin                     | tt0029296        |
| 1746474501        | 1945        | 1945        | Tonight and Every Night            | Tonight and Every Night            | Saville, Victor                  | Victor Saville                      | tt0038178        |
| 1746433960        | 1998        | 1998        | There's Something About Mary       | There's Something About Mary       | Farrelly, Bobby; Farrelly, Peter | Bobby Farrelly                      | tt0129387        |
| 1746184114        | 1910        | 1910        | The Burlesque Queen                | The Burlesque Queen                |                                  | Joseph A. Golden                    | tt0291057        |
| 1746485589        | 1920        | 1920        | The Trail of the Cigarette         | The Trail of the Cigarette         | Collins, Tom                     | Tom Collins                         | tt0166850        |
| 1746467923        | 1917        | 1917        | The Butterfly Girl                 | The Butterfly Girl                 | Otto, Henry                      | Henry Otto                          | tt0168555        |
| 1746509262        | 1925        | 1925        | The Coast Patrol                   | The Coast Patrol                   | Barsky, Bud                      | Bud Barsky                          | tt0015691        |
| 1746574987        | 1937        | 1937        | Yodelin' Kid from Pine Ridge       | Yodelin' Kid from Pine Ridge       | Kane, Joe                        | Joseph Kane                         | tt0029801        |
| 1746571736        | 1931        | 1931        | Hush Money                         | Hush Money                         | Lanfield, Sidney                 | Sidney Lanfield                     | tt0021984        |
| 1745372817        | 2009        | 2009        | Year One                           | Year One                           | Ramis, Harold                    | Harold Ramis                        | tt1045778        |
| 1746487905        | 1920        | 1920        | Alarm Clock Andy                   | Alarm Clock Andy                   | Storm, Jerome                    | Jerome Storm                        | tt0126187        |
| 1746211260        | 1973        | 1973        | Bang the Drum Slowly               | Bang the Drum Slowly               | Hancock, John                    | John D. Hancock                     | tt0069765        |
| <b>1746582954</b> | <b>1938</b> | <b>1938</b> | <b>Blockade</b>                    | <b>Blockade</b>                    | <b>Dieterle, William</b>         | <b>William Dieterle</b>             | <b>tt0029924</b> |
| 1746565970        | 1953        | 1953        | Scared Stiff                       | Scared Stiff                       | Marshall, George                 | George Marshall                     | tt0046280        |
| 1745282544        | 2006        | 2006        | Shadow: Dead Riot                  | Shadow: Dead Riot                  | Wan, Derek                       | Derek Wan                           | tt0427848        |
| 1746208212        | 1969        | 1969        | The Hang-Up                        | Hang Up                            | Hayes, John                      | Joseph Marzano                      | tt0298355        |
| 1746555898        | 1956        | 1956        | The Amazon Trader                  | The Amazon Trader                  | McGowan, Tom                     | Tom McGowan                         | tt0143102        |
| 1746523218        | 1916        | 1916        | The Lure of Heart's Desire         | The Lure of Heart's Desire         | Grandon, Francis J.              | Francis J. Grandon                  | tt0006992        |
| 1746582825        | 1939        | 1939        | You Can't Cheat an Honest Man      | You Can't Cheat an Honest Man      | Marshall, George                 | George Marshall                     | tt0032152        |
| 1746465407        | 1947        | 1947        | Stallion Road                      | Stallion Road                      | Kern, James V.                   | James V. Kern                       | tt0039865        |
| 1746483911        | 1917        | 1917        | The Eternal Mother                 | The Eternal Mother                 | Reicher, Frank                   | Frank Reicher                       | tt0007899        |

|            |      |      |                                 |                                 |                                    |                     |           |
|------------|------|------|---------------------------------|---------------------------------|------------------------------------|---------------------|-----------|
| 1746486856 | 1920 | 1920 | The Butterfly Man               | The Butterfly Man               | Park, Ida May                      | Louis J. Gasnier    | tt0011041 |
| 1746485100 | 1918 | 1918 | The Hired Man                   | The Hired Man                   | Schertzinger, Victor L.            | Victor Schertzinger | tt0009177 |
| 1746235689 | 1976 | 1976 | No Way Back                     | No Way Back                     | Williamson, Fred                   | Fred Williamson     | tt0074969 |
| 1746514241 | 1916 | 1916 | Just a Song at Twilight         | Just a Song at Twilight         | King, Carlton S.                   | Burton L. King      | tt0013285 |
| 1746584794 | 1929 | 1929 | Bye-bye Buddy                   | Bye, Bye, Buddy                 | Mattison, Frank S.                 | Frank S. Mattison   | tt0019740 |
| 1746475772 | 1946 | 1946 | Queen of Burlesque              | Queen of Burlesque              | Newfield, Sam                      | Sam Newfield        | tt0038864 |
| 1746454040 | 1944 | 1944 | Seven Doors to Death            | Seven Doors to Death            | Clifton, Elmer                     | Elmer Clifton       | tt0037262 |
| 1746520389 | 1926 | 1926 | So's Your Old Man               | So's Your Old Man               | La Cava, Gregory                   | Gregory La Cava     | tt0017410 |
| 1746584541 | 1931 | 1931 | Mother and Son                  | Mother and Son                  | McCarthy, John P.                  | John P. McCarthy    | tt0022165 |
| 1746500298 | 1925 | 1925 | Lord Jim                        | Lord Jim                        | Fleming, Victor                    | Victor Fleming      | tt0016037 |
| 1746501495 | 1922 | 1922 | The Bootleggers                 | The Bootleggers                 | Sheldon, Roy                       | Roy Sheldon         | tt0012964 |
| 1745374589 | 2010 | 2010 | Machete                         | Machete                         | Rodriguez, Robert; Maniquis, Ethan | Ethan Maniquis      | tt0985694 |
| 1746581976 | 1930 | 1930 | Lummox                          | Lummox                          | Brenon, Herbert                    | Herbert Brenon      | tt0021105 |
| 1746410869 | 1991 | 1991 | Ricochet                        | Ricochet                        | Mulcahy, Russell                   | Russell Mulcahy     | tt0102789 |
| 1746492715 | 1946 | 1946 | The Best Years of Our Lives     | The Best Years of Our Lives     | Wyller, William                    | William Wyler       | tt0036868 |
| 1746578505 | 1951 | 1950 | The Daltons' Women              | The Daltons' Women              | Carr, Thomas                       | Thomas Carr         | tt0042374 |
| 1746409050 | 1986 | 1986 | What Happened to Kerouac?       | What Happened to Kerouac?       | Lerner, Richard; MacAdams, Lewis   | Richard Lerner      | tt0090312 |
| 1746198504 | 1968 | 1968 | Anzio                           | Anzio                           | Dmytryk, Edward                    | Edward Dmytryk      | tt0062673 |
| 1746561755 | 1955 | 1954 | The Country Girl                | The Country Girl                | Seaton, George                     | George Seaton       | tt0046874 |
| 1746582677 | 1936 | 1936 | Her Master's Voice              | Her Master's Voice              | Santley, Joseph                    | Joseph Santley      | tt0027734 |
| 1746492738 | 1946 | 1946 | One More Tomorrow               | One More Tomorrow               | Godfrey, Peter; Rapper, Irving     | Peter Godfrey       | tt0038802 |
| 1746569762 | 1954 | 1954 | Francis Joins the WACS          | Francis Joins the WACS          | Lubin, Arthur                      | Arthur Lubin        | tt0046995 |
| 1746554538 | 1965 | 1965 | Second Fiddle to a Steel Guitar | Second Fiddle to a Steel Guitar | Duncan, Victor                     | Victor Duncan       | tt0059692 |
| 1746453804 | 1942 | 1942 | A Tornado in the Saddle         | A Tornado in the Saddle         | Berke, William                     | William Berke       | tt0035457 |
| 1746453623 | 1945 | 1945 | I Love a Mystery                | I Love a Mystery                | Levin, Henry                       | Henry Levin         | tt0037803 |
| 1746421366 | 1940 | 1940 | Frontier Crusader               | Frontier Crusader               | Stewart, Peter                     | Sam Newfield        | tt0032497 |
| 1746513853 | 1923 | 1923 | Regeneration                    | Regeneration                    |                                    | Richard E. Norman   | tt0130218 |
| 1746198258 | 1969 | 1969 | Heaven With a Gun               | Heaven with a Gun               | Katzin, Lee H.                     | Lee H. Katzin       | tt0064409 |
| 1746520908 | 1949 | 1949 | Arctic Manhunt                  | Arctic Manhunt                  | Scott, Ewing                       | Ewing Scott         | tt0041132 |
| 1746569754 | 1953 | 1953 | The System                      | The System                      | Seiler, Lewis                      | Lewis Seiler        | tt0046389 |
| 1746583520 | 1951 | 1951 | Man from Sonora                 | Man from Sonora                 | Collins, Lewis                     | Lewis D. Collins    | tt0043779 |
| 1746570338 | 1953 | 1952 | Androcles and the Lion          | Androcles and the Lion          | Erskine, Chester                   | Chester Erskine     | tt0044355 |
| 1746421200 | 1997 | 1997 | Switchback                      | Switchback                      | Stuart, Jeb                        | Jeb Stuart          | tt0119210 |
| 1746584647 | 1929 | 1929 | The Broadway Melody             | The Broadway Melody             | Beaumont, Harry                    | Harry Beaumont      | tt0019729 |
| 1746492387 | 1946 | 1946 | Mantan Messes Up                | Mantan Messes Up                |                                    | Sam Newfield        | tt0135537 |
| 1746554353 | 1964 | 1964 | The NEW Interns                 | The New Interns                 | Rich, John                         | John Rich           | tt0058398 |
| 1746515586 | 1918 | 1918 | The Claw                        | The Claw                        | Vignola, Robert G.                 | Robert G. Vignola   | tt0008966 |
| 1746566060 | 1957 | 1956 | Three Violent People            | Three Violent People            | Maté, Rudolph                      | Rudolph Maté        | tt0049849 |
| 1746578407 | 1960 | 1959 | Virgin Sacrifice                | Virgin Sacrifice                | Wagner, Fernando                   | Fernando Wagner     | tt0188273 |
| 1746520279 | 1926 | 1926 | Frenzied Flames                 | Frenzied Flames                 | Paton, Stuart                      | Stuart Paton        | tt0133780 |
| 1746508741 | 1927 | 1927 | The Lone Rider                  | The Lone Rider                  |                                    | Fred J. Balshofer   | tt0492142 |
| 1746423698 | 1940 | 1940 | Ski Patrol                      | Ski Patrol                      | Landers, Lew                       | Lew Landers         | tt0033056 |
| 1746433561 | 1995 | 1995 | Panther                         | Panther                         | Van Peebles, Mario                 | Mario Van Peebles   | tt0114084 |
| 1746474957 | 1946 | 1946 | The Catman of Paris             | The Catman of Paris             | Selander, Lesley                   | Lesley Selander     | tt0038402 |
| 1745340265 | 2002 | 2001 | Mule Skinner Blues              | Mule Skinner Blues              | Earnhart, Stephen                  | Stephen Earnhart    | tt0290010 |
| 1746499886 | 1923 | 1923 | The Girl I Loved                | The Girl I Loved                | De Grasse, Joseph                  | Joseph De Grasse    | tt0014083 |
| 1746584151 | 1940 | 1940 | Primrose Path                   | Primrose Path                   | La Cava, Gregory                   | Gregory La Cava     | tt0032946 |
| 1746492057 | 1947 | 1947 | The Macomber Affair             | The Macomber Affair             | Korda, Zoltan                      | Zoltan Korda        | tt0039591 |
| 1746520948 | 1949 | 1949 | Call of the Forest              | Call of the Forest              | Link, John F.                      | John F. Link Sr.    | tt0041221 |
| 1746424394 | 1942 | 1942 | Bad Men of the Hills            | Bad Men of the Hills            | Berke, William                     | William Berke       | tt0034489 |
| 1746455316 | 1999 | 1999 | Beyond the Mat                  | Beyond the Mat                  | Blaustein, Barry W.                | Barry W. Blaustein  | tt0218043 |
| 1746520838 | 1925 | 1925 | The Fear Fighter                | The Fear Fighter                | Rogell, Albert                     | Albert S. Rogell    | tt0131390 |
| 1746503757 | 1921 | 1921 | Out of the Depths               | Out of the Depths               | Thayer, Otis B.; Reicher, Frank    | Frank Reicher       | tt0012536 |
| 1746566372 | 1954 | 1954 | Can Can Follies                 | Can Can Follies                 |                                    |                     | tt0134425 |
| 1746554212 | 1963 | 1963 | Charade                         | Charade                         | Donen, Stanley                     | Stanley Donen       | tt0056923 |
| 1746583415 | 1930 | 1930 | What a Man                      | What a Man                      | Crone, George J.                   | George Crone        | tt0021544 |
| 1746574380 | 1963 | 1963 | Lonnie                          | Lonnie                          | Hale, William                      | William Hale        | tt0240688 |

|            |      |      |                                |                                |                      |                     |           |
|------------|------|------|--------------------------------|--------------------------------|----------------------|---------------------|-----------|
| 1746524858 | 1923 | 1923 | Making Good                    | Making Good                    | Perez, Marcel        | Marcel Perez        | tt0266742 |
| 1746515010 | 1923 | 1923 | East Side--West Side           | East Side West Side            | Cummings, Irving     | Irving Cummings     | tt0014012 |
| 1746393669 | 1982 | 1982 | Rocky III                      | Rocky III                      | Stallone, Sylvester  | Sylvester Stallone  | tt0084602 |
| 1746185839 | 1966 | 1966 | A Big Hand for the Little Lady | A Big Hand for the Little Lady | Cook, Fielder        | Fielder Cook        | tt0060165 |
| 1746583792 | 1930 | 1930 | The Second Floor Mystery       | The Second Floor Mystery       | Del Ruth, Roy        | Roy Del Ruth        | tt0021351 |
| 1769971930 | 1969 | 1969 | Detention Girls                | The Detention Girls            |                      | John Rappoport      | tt0197403 |
| 1746501875 | 1914 | 1914 | The Wolf                       | The Wolf                       | O'Neil, Barry        | Barry O'Neil        | tt0004829 |
| 1746201703 | 1970 | 1970 | Max-Out                        | Max Out                        | Kaylor, Robert       | Robert Kaylor       | tt0251241 |
| 1746500221 | 1924 | 1924 | Crashin' Through               | Crashin' Through               | Neitz, Alvin J.      | Alan James          | tt0014806 |
| 1746569801 | 1957 | 1957 | The Ride Back                  | The Ride Back                  | Miner, Allen H.      | Allen H. Miner      | tt0050899 |
| 1746571598 | 1931 | 1931 | Daughter of the Dragon         | Daughter of the Dragon         | Corrigan, Lloyd      | Lloyd Corrigan      | tt0021785 |
| 1746520377 | 1926 | 1926 | Silence                        | Silence                        | Julian, Rupert       | Rupert Julian       | tt0017385 |
| 1746217802 | 1966 | 1966 | Lupe                           | Lupe                           | Warhol, Andy         | Andy Warhol         | tt0414248 |
| 1746574983 | 1937 | 1937 | The Barrier                    | The Barrier                    | Selander, Lesley     | Lesley Selander     | tt0028611 |
| 1746234239 | 1966 | 1966 | Boy, Did I Get a Wrong Number! | Boy, Did I Get a Wrong Number! | Marshall, George     | George Marshall     | tt0060186 |
| 1746571332 | 1934 | 1934 | The Little Minister            | The Little Minister            | Wallace, Richard     | Richard Wallace     | tt0025409 |
| 1746438736 | 1995 | 1995 | Tommy Boy                      | Tommy Boy                      | Segal, Peter         | Peter Segal         | tt0114694 |
| 1746500288 | 1926 | 1926 | The High Hand                  | The High Hand                  | Maloney, Leo         | Leo D. Maloney      | tt0016966 |
| 1746582372 | 1930 | 1930 | Embarrassing Moments           | Embarrassing Moments           | Craft, William James | William James Craft | tt0020853 |
| 1746424207 | 1941 | 1941 | Tobacco Road                   | Tobacco Road                   | Ford, John           | John Ford           | tt0034297 |
| 1746501673 | 1916 | 1916 | A Gutter Magdalene             | A Gutter Magdalene             | Melford, George H.   | George Melford      | tt0006749 |
| 1746574897 | 1933 | 1933 | Neighbors' Wives               | Neighbors' Wives               | Eason, Breezy        | B. Reeves Eason     | tt0155909 |
| 1746566878 | 1933 | 1933 | Professional Sweetheart        | Professional Sweetheart        | Seiter, William A.   | William A. Seiter   | tt0024476 |
| 1746467126 | 1917 | 1917 | Mother O' Mine                 | Mother o' Mine                 | Julian, Rupert       | Rupert Julian       | tt0008325 |
| 1746520903 | 1949 | 1949 | Undertow                       | Undertow                       | Castle, William      | William Castle      | tt0042007 |
| 1746509183 | 1948 | 1948 | Joe Palooka in Winner Take All | Joe Palooka in Winner Take All | LeBorg, Reginald     | Reginald Le Borg    | tt0040493 |
| 1746455879 | 2000 | 2000 | Requiem for a Dream            | Requiem for a Dream            | Aronofsky, Darren    | Darren Aronofsky    | tt0180093 |
| 1746577580 | 1934 | 1934 | Red Morning                    | Red Morning                    | Fox, Wallace         | Wallace Fox         | tt0026918 |
| 1746577811 | 1938 | 1938 | The Lady in the Morgue         | The Lady in the Morgue         | Garrett, Otis        | Otis Garrett        | tt0030342 |
| 1746520473 | 1950 | 1950 | David Harding, Counterspy      | David Harding, Counterspy      | Nazarro, Ray         | Ray Nazarro         | tt0178372 |
| 1746574599 | 1938 | 1938 | Walking Down Broadway          | Walking Down Broadway          | Foster, Norman       | Norman Foster       | tt0030953 |
| 1746542677 | 1926 | 1926 | Hell-Bent fer Heaven           | Hell Bent fer Heaven           | Blackton, J. Stuart  | J. Stuart Blackton  | tt0016955 |
| 1746454765 | 1999 | 1999 | Three Kings                    | Three Kings                    | Russell, David O.    | David O. Russell    | tt0120188 |
| 1746563909 | 1952 | 1952 | The Cimarron Kid               | The Cimarron Kid               | Boetticher, Budd     | Budd Boetticher     | tt0043408 |
| 1746569554 | 1953 | 1953 | The Sun Shines Bright          | The Sun Shines Bright          | Ford, John           | John Ford           | tt0046384 |
| 1746574633 | 1933 | 1933 | Baby Face                      | Baby Face                      | Green, Alfred E.     | Alfred E. Green     | tt0023775 |
| 1746465052 | 1946 | 1946 | Breakfast in Hollywood         | Breakfast in Hollywood         | Schuster, Harold     | Harold D. Schuster  | tt0038382 |
| 1746574343 | 1960 | 1960 | The High Powered Rifle         | The High Powered Rifle         | Dexter, Maury        | Maury Dexter        | tt0053910 |
| 1746453762 | 1943 | 1943 | Minesweeper                    | Minesweeper                    | Berke, William       | William Berke       | tt0036161 |
| 1769976191 | 1921 | 1921 | Free and Easy                  | Free and Easy                  | Kerr, Bob            | Jack White          | tt0248020 |
| 1746503864 | 1921 | 1921 | The Millionaire                | The Millionaire                | Conway, Jack         | Jack Conway         | tt0012460 |
| 1746580788 | 1937 | 1937 | Moonlight on the Range         | Moonlight on the Range         | Newfield, Sam        | Sam Newfield        | tt0029259 |
| 1746511849 | 1915 | 1915 | Through Turbulent Waters       | Through Turbulent Waters       | McRae, Duncan        | Duncan McRae        | tt0006159 |
| 1746571581 | 1932 | 1932 | Night World                    | Night World                    | Henley, Hobart       | Hobart Henley       | tt0023271 |
| 1746581091 | 1951 | 1951 | Sirocco                        | Sirocco                        | Bernhardt, Curtis    | Curtis Bernhardt    | tt0044040 |
| 1769971959 | 1969 | 1969 | Girls in the Saddle            | Girls in the Saddle            | Mauro, Ralph         | Raf Mauro           | tt0219051 |
| 1746503838 | 1918 | 1918 | The Winding Trail              | The Winding Trail              | Collins, John H.     | John H. Collins     | tt0009814 |
| 1746530735 | 1949 | 1948 | Force of Evil                  | Force of Evil                  | Polonsky, Abraham    | Abraham Polonsky    | tt0040366 |
| 1746454829 | 1941 | 1941 | Henry Aldrich for President    | Henry Aldrich for President    | Bennett, Hugh        | Hugh Bennett        | tt0033708 |
| 1746492437 | 1947 | 1947 | Pursued                        | Pursued                        | Walsh, Raoul         | Raoul Walsh         | tt0039737 |
| 1746203407 | 1970 | 1971 | Erika's Hot Summer             | Erika's Hot Summer             | Graver, Gary         | Gary Graver         | tt0065701 |
| 1746504348 | 1918 | 1918 | The Scarlet Trail              | The Scarlet Trail              | Lawrence, John S.    | John S. Lawrence    | tt0009582 |
| 1746235516 | 1978 | 1978 | American Hot Wax               | American Hot Wax               | Mutrix, Floyd        | Floyd Mutrix        | tt0077158 |
| 1746580761 | 1936 | 1936 | I'd Give My Life               | I'd Give My Life               | Marin, Edwin L.      | Edwin L. Marin      | tt0027784 |
| 1746577869 | 1935 | 1935 | Valley of Wanted Men           | Valley of Wanted Men           | James, Alan          | Alan James          | tt0027165 |
| 1745342844 | 2003 | 2003 | Spy Kids 3D: Game Over         | Spy Kids 3: Game Over          | Rodriguez, Robert    | Robert Rodriguez    | tt0338459 |
| 1746513879 | 1922 | 1922 | The Deuce of Spades            | The Deuce of Spades            | Ray, Charles         | Charles Ray         | tt0013067 |



|                   |             |             |                                          |                                         |                                   |                       |                  |
|-------------------|-------------|-------------|------------------------------------------|-----------------------------------------|-----------------------------------|-----------------------|------------------|
| 1746562098        | 1953        | 1953        | The Marshal's Daughter                   | The Marshal's Daughter                  | Berke, William                    | William Berke         | tt0046050        |
| 1746492206        | 1944        | 1944        | Sunday Dinner for a Soldier              | Sunday Dinner for a Soldier             | Bacon, Lloyd                      | Lloyd Bacon           | tt0037326        |
| 1746474464        | 1945        | 1945        | Her Lucky Night                          | Her Lucky Night                         | Lilley, Edward                    | Edward C. Lilley      | tt0037770        |
| 1745359439        | 2002        | 2002        | Martin Lawrence Live: Runteldat          | Martin Lawrence Live: Runteldat         | Raynr, David                      | David Raynr           | tt0327036        |
| 1746583153        | 1935        | 1935        | Air Hawks                                | Air Hawks                               | Rogell, Albert                    | Albert S. Rogell      | tt0026047        |
| 1746542674        | 1924        | 1924        | Merton of the Movies                     | Merton of the Movies                    | Cruze, James                      | James Cruze           | tt0015131        |
| 1746569970        | 1957        | 1957        | Looking for Danger                       | Looking for Danger                      | Jewell, Austen                    | Austen Jewell         | tt0050654        |
| 1746575011        | 1936        | 1936        | Dodsworth                                | Dodsworth                               | Wylar, William                    | William Wylar         | tt0027532        |
| 1746555715        | 1956        | 1956        | The Swan                                 | The Swan                                | Vidor, Charles                    | Charles Vidor         | tt0049815        |
| 1746553554        | 1964        | 1964        | The Luck of Ginger Coffey                | The Luck of Ginger Coffey               | Kershner, Irvin                   | Irvin Kershner        | tt0058305        |
| 1745340130        | 2001        | 2001        | Rat Race                                 | Rat Race                                | Zucker, Jerry                     | Jerry Zucker          | tt0250687        |
| 1746524008        | 1928        | 1928        | The Little Yellow House                  | The Little Yellow House                 | Meehan, James Leo                 | James Leo Meehan      | tt0019107        |
| 1746583868        | 1930        | 1930        | The Dude Wrangler                        | The Dude Wrangler                       | Thorpe, Richard                   | Richard Thorpe        | tt0020846        |
| 1746235415        | 1974        | 1974        | The Front Page                           | The Front Page                          | Wilder, Billy                     | Billy Wilder          | tt0071524        |
| 1746583892        | 1929        | 1929        | Broadway Babies                          | Broadway Babies                         | LeRoy, Mervyn                     | Mervyn LeRoy          | tt0019726        |
| 1746394223        | 1992        | 1992        | Mo' Money                                | Mo' Money                               | Macdonald, Peter                  | Peter MacDonal        | tt0104897        |
| 1746532718        | 1927        | 1927        | The Devil's Masterpiece                  | The Devil's Masterpiece                 | McCarthy, John P.                 | John P. McCarthy      | tt0123037        |
| 1746583578        | 1930        | 1930        | Doughboys                                | Doughboys                               | Sedgwick, Edward                  | Edward Sedgwick       | tt0020838        |
| 1746474407        | 1948        | 1948        | Frontier Agent                           | Frontier Agent                          | Hillyer, Lambert                  | Lambert Hillyer       | tt0040374        |
| 1745341006        | 2001        | 2000        | Sordid Lives                             | Sordid Lives                            | Shores, Del                       | Del Shores            | tt0204640        |
| 1746583843        | 1930        | 1930        | Beau Bandit                              | Beau Bandit                             | Hillyer, Lambert                  | Lambert Hillyer       | tt0020672        |
| 1746235330        | 1975        | 1975        | The Day of the Locust                    | The Day of the Locust                   | Schlesinger, John                 | John Schlesinger      | tt0072848        |
| 1746524942        | 1915        | 1915        | Rule G                                   | Rule G                                  | Lawrence, George W.; Noble, G. M. | George W. Lawrence    | tt0005985        |
| 1746487124        | 1918        | 1918        | The Street of Seven Stars                | The Street of Seven Stars               | O'Brien, John B.                  | John B. O'Brien       | tt0190044        |
| 1746585498        | 1940        | 1939        | The Invisible Killer                     | The Invisible Killer                    | Scott, Sherman                    | Sam Newfield          | tt0032634        |
| 1746410200        | 1987        | 1987        | Shy People                               | Shy People                              | Konchalovsky, Andrei              | Andrei Konchalovskiy  | tt0093964        |
| 1746465005        | 1942        | 1942        | Along the Sundown Trail                  | Along the Sundown Trail                 | Stewart, Peter                    | Sam Newfield          | tt0034453        |
| 1746569738        | 1953        | 1953        | The War of the Worlds                    | The War of the Worlds                   | Haskin, Byron                     | Byron Haskin          | tt0046534        |
| 1746563859        | 1951        | 1951        | Snake River Desperadoes                  | Snake River Desperadoes                 | Sears, Fred F.                    | Fred F. Sears         | tt0044052        |
| 1746578390        | 1950        | 1951        | Two Lost Worlds                          | Two Lost Worlds                         | Dawn, Norman                      | Norman Dawn           | tt0043080        |
| 1746581061        | 1958        | 1958        | Kings Go Forth                           | Kings Go Forth                          | Daves, Delmer                     | Delmer Daves          | tt0051819        |
| 1746574008        | 1962        | 1962        | Brushfire!                               | Brushfire!                              | Warner, Jack                      | Jack Warner Jr.       | tt0055813        |
| 1745282625        | 2007        | 2007        | Hot Rod                                  | Hot Rod                                 | Schaffer, Akiva                   | Akiva Schaffer        | tt0787475        |
| 1746574986        | 1937        | 1937        | Danger--Love at Work                     | Danger Love at Work                     | Preminger, Otto                   | Otto Preminger        | tt0028761        |
| 1746502141        | 1915        | 1915        | It's No Laughing Matter                  | It's No Laughing Matter                 | Weber, Lois                       | Lois Weber            | tt0005556        |
| <b>1746509222</b> | <b>1924</b> | <b>1924</b> | <b>The Lover of Camille</b>              | <b>The Lover of Camille</b>             | <b>Beaumont, Harry</b>            | <b>Harry Beaumont</b> | <b>tt0015091</b> |
| 1746509345        | 1950        | 1950        | The Killer That Stalked New York         | The Killer That Stalked New York        | McEvoy, Earl                      | Earl McEvoy           | tt0042643        |
| 1745293351        | 2005        | 2005        | The Honeymooners                         | The Honeymooners                        | Schultz, John                     | John Schultz          | tt0373908        |
| 1746500025        | 1945        | 1945        | Voice of the Whistler                    | Voice of the Whistler                   | Castle, William                   | William Castle        | tt0038230        |
| 1746497260        | 1917        | 1917        | A Song of Sixpence                       | A Song of Sixpence                      | Dean, Ralph                       | Ralph Dean            | tt0182436        |
| 1746492214        | 1945        | 1945        | The Navajo Trail                         | The Navajo Trail                        | Bretherton, Howard                | Howard Bretherton     | tt0037940        |
| 1746464793        | 1942        | 1942        | Pittsburgh                               | Pittsburgh                              | Seiler, Lewis                     | Lewis Seiler          | tt0035195        |
| 1746465187        | 1947        | 1947        | Dragnet                                  | Dragnet                                 | Goodwins, Leslie                  | Leslie Goodwins       | tt0039339        |
| 1746578791        | 1963        | 1963        | Playgirls International                  | Playgirls International                 | Wishman, Doris                    | Doris Wishman         | tt0187408        |
| 1746578417        | 1959        | 1959        | The Miracle                              | The Miracle                             | Rapper, Irving                    | Irving Rapper         | tt0053069        |
| 1746567797        | 1933        | 1933        | Roman Scandals                           | Roman Scandals                          | Tuttle, Frank                     | Frank Tuttle          | tt0024507        |
| 1746500512        | 1924        | 1924        | Husbands and Lovers                      | Husbands and Lovers                     | Stahl, John M.                    | John M. Stahl         | tt0015005        |
| 1769971168        | 1969        | 1969        | Fulfillment, Something Worth Remembering | Fulfillment, Something Worth Rememberin | Conner, Charles M.                | Charles M. Conner     | tt0218990        |
| 1746520324        | 1925        | 1925        | With This Ring                           | With This Ring                          | Windermere, Fred                  | Fred Windemere        | tt0180308        |
| 1746282176        | 1979        | 1979        | Alien                                    | Alien                                   | Scott, Ridley                     | Ridley Scott          | tt0078748        |
| 1746569741        | 1955        | 1955        | Queen Bee                                | Queen Bee                               | MacDougall, Ranald                | Ranald MacDougall     | tt0048527        |
| 1746520496        | 1926        | 1926        | Ace of Action                            | Ace of Action                           | Bertram, William                  | William Bertram       | tt0016571        |
| 1746423976        | 1941        | 1941        | Two in a Taxi                            | Two in a Taxi                           | Florey, Robert                    | Robert Florey         | tt0034327        |
| 1746513822        | 1923        | 1923        | The Spanish Dancer                       | The Spanish Dancer                      | Brenon, Herbert                   | Herbert Brenon        | tt0014499        |
| 1746496287        | 1918        | 1918        | The Pen Vulture                          | The Pen Vulture                         |                                   | William H. Clifford   | tt0187397        |
| 1746410622        | 1988        | 1988        | Shoot to Kill                            | Shoot to Kill                           | Spottiswoode, Roger               | Roger Spottiswoode    | tt0096098        |
| 1746584026        | 1936        | 1936        | Ride 'Em Cowboy                          | Ride 'Em Cowboy                         | Selander, Leslie                  | Lesley Selander       | tt0028180        |

|            |      |      |                                           |                                           |                                      |                       |           |
|------------|------|------|-------------------------------------------|-------------------------------------------|--------------------------------------|-----------------------|-----------|
| 1746197925 | 1969 | 1969 | The Desperados                            | The Desperados                            | Levin, Henry                         | Henry Levin           | tt0064227 |
| 1746216962 | 1967 | 1967 | The Glory Stompers                        | The Glory Stompers                        | Lanza, Anthony M.                    | Anthony M. Lanza      | tt0061714 |
| 1746473939 | 1947 | 1947 | Code of the West                          | Code of the West                          | Berke, William                       | William Berke         | tt0039271 |
| 1745373769 | 2009 | 2009 | Public Enemies                            | Public Enemies                            | Mann, Michael                        | Michael Mann          | tt1152836 |
| 1746497602 | 1921 | 1921 | A Broken Doll                             | A Broken Doll                             | Dwan, Allan                          | Allan Dwan            | tt0012002 |
| 1746509357 | 1926 | 1926 | Eyes Right                                | Eyes Right!                               | Chaudet, Louis                       | Louis Chaudet         | tt0130676 |
| 1746578424 | 1951 | 1951 | David and Bathsheba                       | David and Bathsheba                       | King, Henry                          | Henry King            | tt0043455 |
| 1746569704 | 1958 | 1958 | Dunkirk                                   | Dunkirk                                   | Norman, Leslie                       | Leslie Norman         | tt0051565 |
| 1746454664 | 1945 | 1945 | This Love of Ours                         | This Love of Ours                         | Dieterle, William                    | William Dieterle      | tt0038162 |
| 1746495798 | 1917 | 1917 | Polly of the Circus                       | Polly of the Circus                       | Horan, Charles T.; Hollywood, Edwin  | Edwin L. Hollywood    | tt0008442 |
| 1746492421 | 1945 | 1945 | Jealousy                                  | Jealousy                                  | Machaty, Gustav                      | Gustav Machatý        | tt0037829 |
| 1746424391 | 1940 | 1940 | Strike Up the Band                        | Strike Up the Band                        | Berkeley, Busby                      | Busby Berkeley        | tt0033110 |
| 1745342927 | 2008 | 2008 | The Midnight Meat Train                   | The Midnight Meat Train                   | Kitamura, Ryuhei                     | Ryûhei Kitamura       | tt0080570 |
| 1746235928 | 1978 | 1978 | The Last Waltz                            | The Last Waltz                            | Scorsese, Martin                     | Martin Scorsese       | tt0077838 |
| 1746523085 | 1910 | 1910 | Out for Mischief                          | Out for Mischief                          |                                      | Gaston Méliès         | tt0361994 |
| 1746580538 | 1936 | 1936 | The Plot Thickens                         | The Plot Thickens                         | Holmes, Ben                          | Ben Holmes            | tt0028111 |
| 1746578456 | 1960 | 1960 | Freckles                                  | Freckles                                  | McLaglen, Andrew V.                  | Andrew V. McLaglen    | tt0053837 |
| 1746502570 | 1913 | 1913 | The Prisoner of Zenda                     | The Prisoner of Zenda                     | Porter, Edwin S.                     | Hugh Ford             | tt0003301 |
| 1746487917 | 1918 | 1918 | Cupid by Proxy                            | Cupid by Proxy                            | Bertram, William                     | William Bertram       | tt0007831 |
| 1746583088 | 1939 | 1939 | The Star Maker                            | The Star Maker                            | Del Ruth, Roy                        | Roy Del Ruth          | tt0031974 |
| 1746453763 | 1945 | 1945 | Hangover Square                           | Hangover Square                           | Brahm, John                          | John Brahm            | tt0037761 |
| 1746577037 | 1959 | 1959 | The Trap                                  | The Trap                                  | Panama, Norman                       | Norman Panama         | tt0053374 |
| 1746581411 | 1928 | 1928 | Saddle Mates                              | Saddle Mates                              | Thorpe, Richard                      | Richard Thorpe        | tt0019343 |
| 1746582339 | 1928 | 1928 | Buckskin Days                             | Buckskin Days                             | Fabian, Walter                       | Walter Fabian         | tt0333193 |
| 1746581698 | 1928 | 1928 | Broadway Daddies                          | Broadway Daddies                          | Windemere, Fred                      | Fred Windemere        | tt0018723 |
| 1746410878 | 1994 | 1994 | Blue Sky                                  | Blue Sky                                  | Richardson, Tony                     | Tony Richardson       | tt0109306 |
| 1746218880 | 1977 | 1977 | MacArthur                                 | MacArthur                                 | Sargent, Joseph                      | Joseph Sargent        | tt0076342 |
| 1746520213 | 1926 | 1926 | The Galloping Cowboy                      | The Galloping Cowboy                      | Craft, William J.                    | William James Craft   | tt0016912 |
| 1746499849 | 1948 | 1948 | Berlin Express                            | Berlin Express                            | Tourneur, Jacques                    | Jacques Tourneur      | tt0040155 |
| 1746199246 | 1969 | 1969 | Change of Mind                            | Change of Mind                            | Stevens, Robert                      | Robert Stevens        | tt0064151 |
| 1746560344 | 1964 | 1964 | Under Age                                 | Under Age                                 | Buchanan, Larry                      | Larry Buchanan        | tt0057621 |
| 1746508058 | 1948 | 1948 | The Mozart Story                          | The Mozart Story                          |                                      | Karl Hartl            | tt0040612 |
| 1746583468 | 1931 | 1931 | Always Goodbye                            | Always Goodbye                            | Menzies, William C.; MacKenna, Ken   | Kenneth MacKenna      | tt0021604 |
| 1746409486 | 1991 | 1991 | Barton Fink                               | Barton Fink                               | Coen, Joel                           | Joel Coen             | tt0101410 |
| 1746208282 | 1967 | 1967 | The President's Analyst                   | The President's Analyst                   | Flicker, Theodore J.                 | Theodore J. Flicker   | tt0062153 |
| 1746566003 | 1956 | 1956 | The Flaming Teenage                       | The Flaming Teenage                       | Yeaworth, Irvin S.; Edwards, Charles | Charles Edwards       | tt0125750 |
| 1746511766 | 1914 | 1914 | The Valley of the Moon                    | The Valley of the Moon                    | Bosworth, Hobart                     | Hobart Bosworth       | tt0004757 |
| 1746574715 | 1936 | 1936 | Valley of the Lawless                     | Valley of the Lawless                     | Bradbury, Robert N.                  | Robert N. Bradbury    | tt0028456 |
| 1746584234 | 1935 | 1935 | Under Pressure                            | Under Pressure                            | Walsh, Raoul                         | Raoul Walsh           | tt0027154 |
| 1746520702 | 1925 | 1925 | The Demon Rider                           | The Demon Rider                           | Hurst, Paul                          | Paul Hurst            | tt0015742 |
| 1746515044 | 1916 | 1916 | Mrs. Dane's Danger                        | Mrs. Dane's Danger                        | North, Wilfrid                       | Wilfrid North         | tt0163112 |
| 1746523576 | 1927 | 1927 | Wandering Girls                           | Wandering Girls                           | Ince, Ralph                          | Ralph Ince            | tt0018546 |
| 1746491966 | 1947 | 1947 | Reet, Petite and Gone                     | Reet, Petite and Gone                     | Crouch, William Forest               | William Forest Crouch | tt0039759 |
| 1746515012 | 1914 | 1914 | The Pawn of Fortune                       | The Pawn of Fortune                       | Wharton, Leopold                     | Leopold Wharton       | tt0004459 |
| 1746584772 | 1929 | 1929 | Love, Live and Laugh                      | Love, Live and Laugh                      | Howard, William K.                   | William K. Howard     | tt0020118 |
| 1746393624 | 1983 | 1983 | The Final Terror                          | The Final Terror                          | Davis, Andrew                        | Andrew Davis          | tt0082379 |
| 1746500566 | 1926 | 1926 | Alaskan Adventures                        | Alaskan Adventures                        | Robertson, Jack                      | Jack Robertson        | tt0377347 |
| 1746580829 | 1939 | 1939 | Winner Take All                           | Winner Take All                           | Brower, Otto                         | Otto Brower           | tt0032131 |
| 1746562182 | 1956 | 1956 | The Lieutenant Wore Skirts                | The Lieutenant Wore Skirts                | Tashlin, Frank                       | Frank Tashlin         | tt0049443 |
| 1746584202 | 1938 | 1938 | Personal Secretary                        | Personal Secretary                        | Garrett, Otis                        | Otis Garrett          | tt0030574 |
| 1745357933 | 2008 | 2008 | Harold & Kumar Escape from Guantanamo Bay | Harold & Kumar Escape from Guantanamo Bay | Hurwitz, Jon ; Schlossberg, Hayden   | Jon Hurwitz           | tt0481536 |
| 1745358064 | 2007 | 2007 | Who Is Norman Lloyd?                      | Who Is Norman Lloyd?                      | Sussman, Matthew                     | Matthew Sussman       | tt1159595 |
| 1746515740 | 1918 | 1918 | Cyclone Higgins, D.D.                     | Cyclone Higgins, D.D.                     | Cabanne, William Christy             | Christy Cabanne       | tt0008987 |
| 1746583046 | 1935 | 1935 | Maybe It's Love                           | Maybe It's Love                           | McGann, William                      | William C. McGann     | tt0026691 |
| 1745282875 | 2006 | 2006 | Saw III                                   | Saw III                                   | Bousman, Darren Lynn                 | Darren Lynn Bousman   | tt0489270 |
| 1746574952 | 1937 | 1937 | Boots of Destiny                          | Boots of Destiny                          | Rosson, Arthur                       | Arthur Rosson         | tt0028647 |
| 1745360021 | 2001 | 2001 | Startup.com                               | Startup.com                               | Noujaim, Jehane; Hegedus, Chris      | Chris Hegedus         | tt0256408 |

|            |      |      |                                   |                                   |                                        |                     |           |
|------------|------|------|-----------------------------------|-----------------------------------|----------------------------------------|---------------------|-----------|
| 1745282653 | 2006 | 2006 | Idlewild                          | Idlewild                          | Barber, Bryan                          | Bryan Barber        | tt0417225 |
| 1745342792 | 2009 | 2008 | Two Lovers                        | Two Lovers                        | Gray, James                            | James Gray          | tt1103275 |
| 1746573506 | 1932 | 1932 | Hot Saturday                      | Hot Saturday                      | Seiter, William                        | William A. Seiter   | tt0023028 |
| 1746562386 | 1954 | 1954 | The Outcast                       | The Outcast                       | Witney, William                        | William Witney      | tt0047320 |
| 1746566199 | 1957 | 1957 | The Brothers Rico                 | The Brothers Rico                 | Karlson, Phil                          | Phil Karlson        | tt0050213 |
| 1746570975 | 1952 | 1952 | Bal Tabarin                       | Bal Tabarin                       | Ford, Philip                           | Philip Ford         | tt0044394 |
| 1746491725 | 1945 | 1945 | Cornered                          | Cornered                          | Dmytryk, Edward                        | Edward Dmytryk      | tt0037615 |
| 1746583200 | 1929 | 1929 | Fast Life                         | Fast Life                         | Dillon, John Francis                   | John Francis Dillon | tt0019872 |
| 1746578757 | 1958 | 1958 | The Toughest Gun in Tombstone     | The Toughest Gun in Tombstone     | Bellamy, Earl                          | Earl Bellamy        | tt0052312 |
| 1746549850 | 1954 | 1954 | The World Dances                  | The World Dances                  | Peters, Brooke L.                      | Boris Petroff       | tt0131140 |
| 1746577698 | 1935 | 1935 | Scream in the Night               | A Scream in the Night             | Newmeyer, Fred                         | Fred C. Newmeyer    | tt0026971 |
| 1746508573 | 1926 | 1926 | The Combat                        | The Combat                        | Reynolds, Lynn                         | Lynn Reynolds       | tt0016736 |
| 1746208298 | 1969 | 1969 | Changes                           | Changes                           | Bartlett, Hall                         | Hall Bartlett       | tt0064152 |
| 1746410683 | 1985 | 1985 | Clue                              | Clue                              | Lynn, Jonathan                         | Jonathan Lynn       | tt0088930 |
| 1746408503 | 1988 | 1988 | Working Girl                      | Working Girl                      | Nichols, Mike                          | Mike Nichols        | tt0096463 |
| 1745272529 | 2000 | 2000 | Miss Congeniality                 | Miss Congeniality                 | Petrie, Donald                         | Donald Petrie       | tt0212346 |
| 1746584576 | 1928 | 1928 | Bitter Sweets                     | Bitter Sweets                     | Hutchison, Charles                     | Charles Hutchison   | tt0018702 |
| 1745303230 | 2007 | 2006 | The Sasquatch Gang                | The Sasquatch Gang                | Skousen, Tim                           | Tim Skousen         | tt0460925 |
| 1745282688 | 2005 | 2005 | Sex Sells: The Making of 'Touche' | Sex Sells: The Making of 'Touche' | Liebert, Jonathan                      | Jonathan Liebert    | tt0372401 |
| 1746580590 | 1935 | 1935 | The Old Homestead                 | The Old Homestead                 | Nigh, William                          | William Nigh        | tt0026810 |
| 1746570320 | 1952 | 1952 | Paula                             | Paula                             | Maté, Rudolph                          | Rudolph Maté        | tt0045016 |
| 1746520928 | 1950 | 1950 | The Iroquois Trail                | The Iroquois Trail                | Karlson, Phil                          | Phil Karlson        | tt0042602 |
| 1769970495 | 1966 | 1966 | Banned                            | Banned                            |                                        | Jerry Denby         | tt0212800 |
| 1746578651 | 1961 | 1961 | Master of the World               | Master of the World               | Witney, William                        | William Witney      | tt0055152 |
| 1745272498 | 2000 | 2000 | Snow Day                          | Snow Day                          | Koch, Chris                            | Chris Koch          | tt0184907 |
| 1746491997 | 1947 | 1947 | That Hagen Girl                   | That Hagen Girl                   | Godfrey, Peter                         | Peter Godfrey       | tt0039892 |
| 1746508720 | 1949 | 1949 | The Fighting Redhead              | The Fighting Redhead              | Collins, Lewis D.                      | Lewis D. Collins    | tt0179809 |
| 1746578812 | 1961 | 1961 | The Beast of Yucca Flats          | The Beast of Yucca Flats          | Francis, Coleman                       | Coleman Francis     | tt0054673 |
| 1746465289 | 1942 | 1942 | Once Upon a Honeymoon             | Once Upon a Honeymoon             | McCarey, Leo                           | Leo McCarey         | tt0035151 |
| 1746509201 | 1926 | 1926 | The Phantom Bullet                | The Phantom Bullet                | Smith, Clifford S.                     | Clifford Smith      | tt0017263 |
| 1746561937 | 1957 | 1957 | No Down Payment                   | No Down Payment                   | Ritt, Martin                           | Martin Ritt         | tt0050771 |
| 1746464889 | 1941 | 1941 | The Great American Broadcast      | The Great American Broadcast      | Mayo, Archie                           | Archie Mayo         | tt0033674 |
| 1746502723 | 1917 | 1917 | Fighting for Love                 | Fighting for Love                 | Wells, Raymond                         | Raymond Wells       | tt0007940 |
| 1746570726 | 1933 | 1933 | Disgraced                         | Disgraced                         | Kenton, Erle C.                        | Erle C. Kenton      | tt0023951 |
| 1746533018 | 1923 | 1923 | Oils Well!                        | Oil's Well                        | Goldaine, Mark                         | Mark Goldaine       | tt0860478 |
| 1746582447 | 1937 | 1937 | Ready, Willing and Able           | Ready, Willing and Able           | Enright, Ray                           | Ray Enright         | tt0029467 |
| 1745272753 | 2000 | 2000 | Road Trip                         | Road Trip                         | Phillips, Todd                         | Todd Phillips       | tt0215129 |
| 1746503509 | 1920 | 1920 | A Common Level                    | A Common Level                    | King, Burton                           | Burton L. King      | tt0189433 |
| 1746475908 | 1948 | 1948 | All My Sons                       | All My Sons                       | Reis, Irving                           | Irving Reis         | tt0040087 |
| 1769973129 | 1925 | 1925 | Tailoring                         | Tailoring                         | Davis, Jimmy                           | James D. Davis      | tt0189135 |
| 1746584838 | 1930 | 1930 | Raffles                           | Raffles                           | D'Arrast, Harry d'Abbadie; Fitzmaurice | George Fitzmaurice  | tt0021281 |
| 1746435208 | 1941 | 1941 | Horror Island                     | Horror Island                     | Waggner, George                        | George Waggner      | tt0033728 |
| 1746581368 | 1950 | 1950 | The Miniver Story                 | The Miniver Story                 | Potter, H. C.; Saville, Victor         | H.C. Potter         | tt0042735 |
| 1746584503 | 1931 | 1931 | Women of All Nations              | Women of All Nations              | Walsh, Raoul                           | Raoul Walsh         | tt0022576 |
| 1746199487 | 1969 | 1969 | Diaries, Notes, and Sketches      | Diaries Notes and Sketches        | Mekas, Jonas                           | Jonas Mekas         | tt0196499 |
| 1746582940 | 1938 | 1938 | Whirlwind Horseman                | Whirlwind Horseman                | Hill, Robert                           | Robert F. Hill      | tt0030972 |
| 1746475523 | 1948 | 1948 | California Firebrand              | California Firebrand              | Ford, Philip                           | Philip Ford         | tt0040201 |
| 1746436343 | 1940 | 1940 | Oh, Johnny, How You Can Love      | Oh, Johnny, How You Can Love!     | Lamont, Charles                        | Charles Lamont      | tt0032857 |
| 1746497675 | 1921 | 1921 | The Family Closet                 | The Family Closet                 | O'Brien, John B.                       | John B. O'Brien     | tt0012152 |
| 1746491733 | 1944 | 1944 | Lost in a Harem                   | Lost in a Harem                   | Riesner, Charles                       | Charles Reisner     | tt0037027 |
| 1746200565 | 1970 | 1970 | ... Tick ... Tick ... Tick ...    | ...tick... tick... tick...        | Nelson, Ralph                          | Ralph Nelson        | tt0065360 |
| 1746533027 | 1923 | 1923 | Don't Marry for Money             | Don't Marry for Money             | Brown, Clarence L.                     | Clarence Brown      | tt0013999 |
| 1746577513 | 1933 | 1933 | 42nd Street                       | 42nd Street                       | Bacon, Lloyd                           | Lloyd Bacon         | tt0024034 |
| 1746435206 | 1940 | 1940 | Strange Cargo                     | Strange Cargo                     | Borzage, Frank                         | Frank Borzage       | tt0033105 |
| 1746514057 | 1916 | 1916 | Driftwood                         | Driftwood                         | Farnum, Marshall                       | Marshall Farnum     | tt0132102 |
| 1746499917 | 1948 | 1948 | Fighting Father Dunne             | Fighting Father Dunne             | Tetzlaff, Ted                          | Ted Tetzlaff        | tt0040355 |
| 1746493789 | 1910 | 1910 | Michael Strogoff                  | Michael Strogoff                  | Dawley, J. Searle                      | J. Searle Dawley    | tt0001318 |

|                   |             |             |                                      |                                      |                                     |                       |                  |
|-------------------|-------------|-------------|--------------------------------------|--------------------------------------|-------------------------------------|-----------------------|------------------|
| 1746583940        | 1930        | 1930        | Captain Thunder                      | Captain Thunder                      | Crosland, Alan                      | Alan Crosland         | tt0020740        |
| 1746504216        | 1920        | 1920        | Leave It to Me                       | Leave It to Me                       | Flynn, Emmett J.                    | Emmett J. Flynn       | tt0011392        |
| 1746513200        | 1916        | 1916        | Ashes of Embers                      | Ashes of Embers                      | Kaufman, Joseph                     | Edward José           | tt0006378        |
| 1746520167        | 1925        | 1925        | Heads Up                             | Heads Up                             | Garson, Harry                       | Harry Garson          | tt0134707        |
| 1746532831        | 1923        | 1923        | You Can't Fool Your Wife             | You Can't Fool Your Wife             | Melford, George                     | George Melford        | tt0014631        |
| 1746515292        | 1919        | 1919        | Let's Elope                          | Let's Elope                          | Robertson, John S.                  | John S. Robertson     | tt0010350        |
| 1746582956        | 1935        | 1935        | Wilderness Mail                      | Wilderness Mail                      | Sheldon, Forrest                    | Forrest Sheldon       | tt0027218        |
| 1746574541        | 1952        | 1952        | Border Saddlemates                   | Border Saddlemates                   | Witney, William                     | William Witney        | tt0044439        |
| 1745342208        | 2001        | 2001        | Two Can Play that Game               | Two Can Play That Game               | Brown, Mark                         | Mark Brown            | tt0269341        |
| 1746577552        | 1935        | 1935        | A Midsummer Night's Dream            | A Midsummer Night's Dream            | Reinhardt, Max; Dieterle, William   | William Dieterle      | tt0026714        |
| 1746509259        | 1925        | 1925        | The Texas Trail                      | The Texas Trail                      | Dunlap, Scott R.                    | Scott R. Dunlap       | tt0016416        |
| 1746516063        | 1921        | 1921        | Enchantment                          | Enchantment                          | Vignola, Robert G.                  | Robert G. Vignola     | tt0012136        |
| 1746582700        | 1937        | 1937        | On the Avenue                        | On the Avenue                        | Del Ruth, Roy                       | Roy Del Ruth          | tt0029345        |
| 1769970806        | 1914        | 1914        | The Flames of Justice                | The Flames of Justice                | Billig, Irving                      |                       | tt2773722        |
| 1746523970        | 1915        | 1915        | The Nigger                           | The Nigger                           | Lewis, Edgar                        | Edgar Lewis           | tt0005809        |
| 1746580229        | 1936        | 1936        | The Rogues' Tavern                   | The Rogues' Tavern                   | Hill, Bob                           | Robert F. Hill        | tt0028200        |
| <b>1746561328</b> | <b>1954</b> | <b>1954</b> | <b>They Rode West</b>                | <b>They Rode West</b>                | <b>Karlson, Phil</b>                | <b>Phil Karlson</b>   | <b>tt0047575</b> |
| 1746409977        | 1986        | 1985        | The Statue of Liberty                | The Statue of Liberty                | Burns, Ken                          | Ken Burns             | tt0092011        |
| 1745293640        | 2005        | 2005        | The Exorcism of Emily Rose           | The Exorcism of Emily Rose           | Derrickson, Scott                   | Scott Derrickson      | tt0404032        |
| 1746502276        | 1916        | 1916        | The Price of Happiness               | The Price of Happiness               | Lawrence, Edmond                    | Edmund Lawrence       | tt0007210        |
| 1745342804        | 2008        | 2008        | Semi-Pro                             | Semi Pro                             | Alterman, Kent                      | Kent Alterman         | tt0839980        |
| 1746218767        | 1977        | 1977        | The Incredible Melting Man           | The Incredible Melting Man           | Sachs, William                      | William Sachs         | tt0076191        |
| 1746582981        | 1939        | 1939        | Across the Plains                    | Across the Plains                    | Bennett, Spencer                    | Spencer Gordon Bennet | tt0031018        |
| 1746437328        | 1940        | 1940        | Tear Gas Squad                       | Tear Gas Squad                       | Morse, Terry                        | Terry O. Morse        | tt0033137        |
| <b>1746424227</b> | <b>1940</b> | <b>1940</b> | <b>Lights Out in Europe</b>          | <b>Lights Out in Europe</b>          | <b>Kline, Herbert</b>               | <b>Herbert Kline</b>  | <b>tt0195882</b> |
| 1746570734        | 1933        | 1933        | Her Resale Value                     | Her Resale Value                     | Eason, Breezy                       | B. Reeves Eason       | tt0024112        |
| 1746532845        | 1923        | 1923        | Pleasure Mad                         | Pleasure Mad                         | Barker, Reginald                    | Reginald Barker       | tt0014364        |
| 1746208671        | 1969        | 1969        | The Mad Room                         | The Mad Room                         | Girard, Bernard                     | Bernard Girard        | tt0064617        |
| 1746585199        | 1928        | 1928        | Sins of the Fathers                  | Sins of the Fathers                  | Berger, Ludwig                      | Ludwig Berger         | tt0019391        |
| 1746496301        | 1920        | 1920        | Fickle Women                         | Fickle Women                         | Butler, Frederick J.; McClung, Hugh | Fred J. Butler        | tt0194875        |
| 1746583592        | 1929        | 1929        | Night Parade                         | Night Parade                         | St. Clair, Malcolm                  | Malcolm St. Clair     | tt0020218        |
| 1746235030        | 1980        | 1980        | Caddyshack                           | Caddyshack                           | Ramis, Harold                       | Harold Ramis          | tt0080487        |
| 1746570577        | 1933        | 1933        | Goldie Gets Along                    | Goldie Gets Along                    | St. Clair, Malcolm                  | Malcolm St. Clair     | tt0024072        |
| 1746486852        | 1919        | 1919        | The Cinema Murder                    | The Cinema Murder                    | Baker, George D.                    | George D. Baker       | tt0010008        |
| 1746576713        | 1932        | 1932        | The Son-Daughter                     | The Son Daughter                     | Brown, Clarence                     | Clarence Brown        | tt0023495        |
| 1746422286        | 1998        | 1998        | 3 Ninjas: High Noon at Mega Mountain | 3 Ninjas: High Noon at Mega Mountain | McNamara, Sean                      | Sean McNamara         | tt0118539        |
| 1746566181        | 1953        | 1953        | Split Second                         | Split Second                         | Powell, Dick                        | Dick Powell           | tt0046353        |
| 1746584922        | 1939        | 1939        | ...one third of a nation...          | ...One Third of a Nation...          | Murphy, Dudley                      | Dudley Murphy         | tt0031761        |
| 1746475279        | 1948        | 1947        | Heading for Heaven                   | Heading for Heaven                   | Collins, Lewis D.                   | Lewis D. Collins      | tt0039451        |
| 1746585365        | 1939        | 1939        | Only Angels Have Wings               | Only Angels Have Wings               | Hawks, Howard                       | Howard Hawks          | tt0031762        |
| 1746569680        | 1955        | 1955        | Count Three and Pray                 | Count Three and Pray                 | Sherman, George                     | George Sherman        | tt0047954        |
| 1746561097        | 1932        | 1932        | False Faces                          | False Faces                          | Sherman, Lowell                     | Lowell Sherman        | tt0022875        |
| 1769969351        | 1964        | 1964        | The Erotic Mr. Rose                  | The Erotic Mr. Rose                  | Millard, Nicholas                   | Nick Millard          | tt0788069        |
| 1746424180        | 1941        | 1941        | Last of the Duanes                   | Last of the Duanes                   | Tinling, James                      | James Tinling         | tt0033817        |
| 1746584128        | 1938        | 1938        | The Main Event                       | The Main Event                       | Dare, Danny                         | Daniel Dare           | tt0030401        |
| 1745272119        | 2000        | 2000        | Tigerland                            | Tigerland                            | Schumacher, Joel                    | Joel Schumacher       | tt0170691        |
| 1746577036        | 1963        | 1963        | Tammy and the Doctor                 | Tammy and the Doctor                 | Keller, Harry                       | Harry Keller          | tt0057558        |
| 1746487345        | 1917        | 1917        | Pride                                | Pride                                | Ridgely, Richard                    | Richard Ridgely       | tt0008455        |
| 1746532752        | 1923        | 1923        | Brass Commandments                   | Brass Commandments                   | Reynolds, Lynn F.                   | Lynn Reynolds         | tt0013888        |
| 1746583641        | 1931        | 1931        | The Great Meadow                     | The Great Meadow                     | Brabin, Charles                     | Charles Brabin        | tt0021928        |
| 1746582410        | 1938        | 1938        | Mystery House                        | Mystery House                        | Smith, Noel                         | Noel M. Smith         | tt0030485        |
| 1746569679        | 1953        | 1953        | The President's Lady                 | The President's Lady                 | Levin, Henry                        | Henry Levin           | tt0046204        |
| 1746509028        | 1949        | 1949        | Tulsa                                | Tulsa                                | Heisler, Stuart                     | Stuart Heisler        | tt0041994        |
| 1746410711        | 1991        | 1991        | Necessary Roughness                  | Necessary Roughness                  | Dragoti, Stan                       | Stan Dragoti          | tt0102517        |
| 1746530728        | 1948        | 1948        | Thunder in the Pines                 | Thunder in the Pines                 | Edwards, Robert                     | Robert Gordon         | tt0040879        |
| 1746515744        | 1920        | 1920        | The Dark Mirror                      | The Dark Mirror                      | Giblyn, Charles                     | Charles Giblyn        | tt0011094        |
| 1746199523        | 1969        | 1969        | Five the Hard Way                    | Five the Hard Way                    | Trikonis, Gus                       | Gus Trikonis          | tt0061671        |

1

1

|                   |             |             |                               |                               |                       |                                     |                  |
|-------------------|-------------|-------------|-------------------------------|-------------------------------|-----------------------|-------------------------------------|------------------|
| 1746520814        | 1926        | 1926        | The Silent Lover              | The Silent Lover              | Archainbaud, George   | George Archainbaud                  | tt0017388        |
| 1746454304        | 1941        | 1941        | Dynamite Canyon               | Dynamite Canyon               | Tansey, Robert        | Robert Emmett Tansey                | tt0033566        |
| 1746581628        | 1910        | 1910        | In the Season of Buds         | In the Season of Buds         | Griffith, D. W.       | D.W. Griffith                       | tt0001268        |
| 1746578700        | 1961        | 1961        | Tomboy and the Champ          | Tomboy and the Champ          | Lyon, Francis D.      | Francis D. Lyon                     | tt0055533        |
| 1746410611        | 1988        | 1988        | Casual Sex?                   | Casual Sex?                   | Robert, Genevieve     | Geneviève Robert                    | tt0094846        |
| 1746569764        | 1953        | 1953        | Young Bess                    | Young Bess                    | Sidney, George        | George Sidney                       | tt0046564        |
| 1746582454        | 1936        | 1936        | Ring Around the Moon          | Ring Around the Moon          | Lamont, Charles       | Charles Lamont                      | tt0028186        |
| 1746577981        | 1936        | 1936        | Prison Shadows                | Prison Shadows                | Hill, Bob             | Robert F. Hill                      | tt0028140        |
| 1746520432        | 1926        | 1926        | Jack o'Hearts                 | Jack O'Hearts                 | Hartford, David       | David Hartford                      | tt0135478        |
| 1746423469        | 1994        | 1994        | Nell                          | Nell                          | Apted, Michael        | Michael Apted                       | tt0110638        |
| 1746574833        | 1936        | 1936        | Ghost-Town Gold               | Ghost Town Gold               | Kane, Joseph          | Joseph Kane                         | tt0027670        |
| 1746584770        | 1930        | 1930        | Son of the Gods               | Son of the Gods               | Lloyd, Frank          | Frank Lloyd                         | tt0021400        |
| 1746559869        | 1964        | 1964        | The Masque of the Red Death   | The Masque of the Red Death   | Corman, Roger         | Roger Corman                        | tt0058333        |
| 1746497062        | 1917        | 1917        | Sweetheart of the Doomed      | Sweetheart of the Doomed      | Barker, Reginald      | Reginald Barker                     | tt0182477        |
| 1746514281        | 1915        | 1915        | A Gilded Fool                 | A Gilded Fool                 | Lewis, Edgar          | Edgar Lewis                         | tt0005384        |
| 1746580758        | 1935        | 1935        | One New York Night            | One New York Night            | Conway, Jack          | Jack Conway                         | tt0026823        |
| 1746524810        | 1915        | 1915        | The Island of Regeneration    | The Island of Regeneration    | Davenport, Harry      | Harry Davenport                     | tt0005554        |
| 1746434326        | 1995        | 1995        | Species                       | Species                       | Donaldson, Roger      | Roger Donaldson                     | tt0114508        |
| 1746524139        | 1910        | 1910        | The Unknown Claim             | The Unknown Claim             | Anderson, G. M.       | Gilbert M. 'Broncho Billy' Anderson | tt0001436        |
| 1746454405        | 1945        | 1945        | The Phantom Speaks            | The Phantom Speaks            | English, John         | John English                        | tt0037984        |
| 1746503461        | 1919        | 1919        | A Little Brother of the Rich  | A Little Brother of the Rich  | Reynolds, Lynn        | Lynn Reynolds                       | tt0010367        |
| 1746524337        | 1915        | 1915        | My Madonna                    | My Madonna                    | Blaché, Alice         | Alice Guy                           | tt0005790        |
| 1745359484        | 2008        | 2008        | Sex and the City              | Sex and the City              | King, Michael Patrick | Michael Patrick King                | tt1000774        |
| 1746503592        | 1919        | 1919        | The Open Door                 | The Open Door                 | Fitzgerald, Dallas M. | Dallas M. Fitzgerald                | tt0010531        |
| 1746424427        | 1940        | 1940        | She Couldn't Say No           | She Couldn't Say No           | Clemens, William      | William Clemens                     | tt0034178        |
| 1746516343        | 1920        | 1920        | The Life of the Party         | The Life of the Party         | Henabery, Joseph      | Joseph Henabery                     | tt0011401        |
| 1746501591        | 1916        | 1916        | The Stain in the Blood        | The Stain in the Blood        | MacQuarrie, Murdock   | Murdock MacQuarrie                  | tt0158990        |
| 1746394232        | 1992        | 1991        | Lunatics: A Love Story        | Lunatics: A Love Story        | Becker, Josh          | Josh Becker                         | tt0102357        |
| 1746524723        | 1922        | 1922        | Daring Danger                 | Daring Danger                 | Smith, Cliff          | Clifford Smith                      | tt0013050        |
| 1746581900        | 1910        | 1910        | The Highbinders               | The Highbinders               |                       |                                     | tt1840951        |
| 1746508081        | 1927        | 1927        | Rubber Tires                  | Rubber Tires                  | Hale, Alan            | Alan Hale                           | tt0018350        |
| 1746520467        | 1950        | 1950        | Johnny One-Eye                | Johnny One Eye                | Florey, Robert        | Robert Florey                       | tt0042618        |
| 1746437171        | 1997        | 1997        | Office Killer                 | Office Killer                 | Sherman, Cindy        | Cindy Sherman                       | tt0119819        |
| 1746467324        | 1917        | 1917        | The Sainly Sinner             | The Sainly Sinner             | Wells, Raymond        | Raymond Wells                       | tt0008533        |
| 1746474825        | 1947        | 1947        | Oregon Trail Scouts           | Oregon Trail Scouts           | Springsteen, R. G.    | R.G. Springsteen                    | tt0039683        |
| 1745272358        | 2000        | 2000        | My Dog Skip                   | My Dog Skip                   | Russell, Jay          | Jay Russell                         | tt0156812        |
| 1746584506        | 1928        | 1928        | The Good-Bye Kiss             | The Good Bye Kiss             | Sennett, Mack         | Mack Sennett                        | tt0018951        |
| 1745394319        | 2010        | 2010        | Eat Pray Love                 | Eat Pray Love                 | Murphy, Ryan          | Ryan Murphy                         | tt0879870        |
| 1746555192        | 1956        | 1956        | Love Me Tender                | Love Me Tender                | Webb, Robert D.       | Robert D. Webb                      | tt0049452        |
| 1746573499        | 1932        | 1932        | Is My Face Red?               | Is My Face Red?               | Seiter, William       | William A. Seiter                   | tt0023066        |
| 1746581489        | 1950        | 1950        | Rio Grande Patrol             | Rio Grande Patrol             | Selander, Lesley      | Lesley Selander                     | tt0042896        |
| <b>1746573748</b> | <b>1957</b> | <b>1956</b> | <b>Full of Life</b>           | <b>Full of Life</b>           | <b>Quine, Richard</b> | <b>Richard Quine</b>                | <b>tt0049240</b> |
| 1745294010        | 2007        | 2007        | Rush Hour 3                   | Rush Hour 3                   | Ratner, Brett         | Brett Ratner                        | tt0293564        |
| 1746465255        | 1944        | 1944        | Partners of the Trail         | Partners of the Trail         | Hillyer, Lambert      | Lambert Hillyer                     | tt0037165        |
| 1746514731        | 1915        | 1915        | Kreutzer Sonata               | Kreutzer Sonata               | Brenon, Herbert       | Herbert Brenon                      | tt0005592        |
| 1746577394        | 1961        | 1961        | Eternal Summer                | Eternal Summer                | Wolk, Larry           | Larry Wolk                          | tt0210030        |
| 1746219000        | 1976        | 1976        | Cannonball                    | Cannonball!                   | Bartel, Paul          | Paul Bartel                         | tt0074279        |
| 1746566147        | 1956        | 1955        | No Place to Hide              | No Place to Hide              | Shaftel, Josef        | Josef Shaftel                       | tt0049557        |
| 1746582034        | 1951        | 1951        | Father Takes the Air          | Father Takes the Air          | McDonald, Frank       | Frank McDonald                      | tt0043525        |
| 1746500509        | 1926        | 1926        | The Love Thief                | The Love Thief                | McDermott, John       | John McDermott                      | tt0017084        |
| 1746567701        | 1933        | 1933        | The Shadow Laughs             | The Shadow Laughs             | Hoerl, Arthur         | Arthur Hoerl                        | tt0024545        |
| 1746474970        | 1944        | 1944        | The Very Thought of You       | The Very Thought of You       | Daves, Delmer         | Delmer Daves                        | tt0037428        |
| 1746581328        | 1959        | 1959        | --30--                        | 30                            | Webb, Jack            | Jack Webb                           | tt0052526        |
| 1746504204        | 1919        | 1919        | It Pays to Advertise          | It Pays to Advertise          | Crisp, Donald         | Donald Crisp                        | tt0010305        |
| 1746561307        | 1955        | 1955        | Headline Hunters              | Headline Hunters              | Witney, William       | William Witney                      | tt0048150        |
| 1746577489        | 1961        | 1961        | The Two Little Bears          | The Two Little Bears          | Hood, Randall         | Randall Hood                        | tt0055555        |
| 1745357717        | 2008        | 2008        | The Day the Earth Stood Still | The Day the Earth Stood Still | Derrickson, Scott     | Scott Derrickson                    | tt0970416        |

|            |      |      |                                |                                |                                  |                        |           |
|------------|------|------|--------------------------------|--------------------------------|----------------------------------|------------------------|-----------|
| 1746578044 | 1935 | 1935 | George White's 1935 Scandals   | George White's 1935 Scandals   | Tinling, James                   | George White           | tt0026403 |
| 1746523250 | 1927 | 1927 | Wolf's Clothing                | Wolf's Clothing                | Del Ruth, Roy                    | Roy Del Ruth           | tt0018585 |
| 1745309640 | 2006 | 2006 | Let's Go to Prison             | Let's Go to Prison             | Odenkirk, Bob                    | Bob Odenkirk           | tt0454987 |
| 1746569632 | 1957 | 1957 | Jeanne Eagels                  | Jeanne Eagels                  | Sidney, George                   | George Sidney          | tt0050560 |
| 1746508568 | 1927 | 1927 | The Silent Rider               | The Silent Rider               | Reynolds, Lynn                   | Lynn Reynolds          | tt0018401 |
| 1746454831 | 1942 | 1942 | Joan of Ozark                  | Joan of Ozark                  | Stanley, Joseph                  | Joseph Santley         | tt0034918 |
| 1746570302 | 1952 | 1952 | Ma and Pa Kettle at the Fair   | Ma and Pa Kettle at the Fair   | Barton, Charles                  | Charles Barton         | tt0044862 |
| 1746475245 | 1948 | 1948 | The Big Punch                  | The Big Punch                  | Shourds, Sherry                  | Sherry Shourds         | tt0040161 |
| 1746516357 | 1920 | 1920 | The Woman of Mystery           | The Woman of Mystery           |                                  | Grace Cunard           | tt0203212 |
| 1746393975 | 1989 | 1989 | Born on the Fourth of July     | Born on the Fourth of July     | Stone, Oliver                    | Oliver Stone           | tt0096969 |
| 1746435516 | 1940 | 1940 | Golden Gloves                  | Golden Gloves                  | Dmytryk, Edward                  | Edward Dmytryk         | tt0031378 |
| 1746182579 | 1910 | 1910 | Capital vs. Labor              | Capital vs. Labor              |                                  | Van Dyke Brooke        | tt0221051 |
| 1746520436 | 1926 | 1926 | Beauty à la Mud                | Beauty à la Mud                | Beaudine, Harold                 | Harold Beaudine        | tt0336010 |
| 1746491728 | 1946 | 1946 | The El Paso Kid                | The El Paso Kid                | Carr, Thomas                     | Thomas Carr            | tt0038507 |
| 1746524112 | 1910 | 1910 | The Rummage Sale               | The Rummage Sale               |                                  | Sam Morris             | tt1131693 |
| 1746577909 | 1938 | 1938 | Reformatory                    | Reformatory                    | Collins, Lewis D.                | Lewis D. Collins       | tt0030664 |
| 1746501158 | 1915 | 1914 | The Last Chapter               | The Last Chapter               | Taylor, William Desmond          | William Desmond Taylor | tt0005604 |
| 1746410695 | 1983 | 1983 | Bad Boys                       | Bad Boys                       | Rosenthal, Richard L.            | Rick Rosenthal         | tt0085210 |
| 1745341483 | 2010 | 2010 | Letters to Juliet              | Letters to Juliet              | Winick, Gary                     | Gary Winick            | tt0892318 |
| 1746438617 | 1940 | 1940 | Danger on Wheels               | Danger on Wheels               | Cabanne, Christy                 | Christy Cabanne        | tt0032380 |
| 1746185855 | 1969 | 1968 | The Green Slime                | The Green Slime                | Fukasaku, Kinji                  | Kinji Fukasaku         | tt0064393 |
| 1746520085 | 1926 | 1926 | Winning the Futurity           | Winning the Futurity           | Dunlap, Scott                    | Scott R. Dunlap        | tt0017568 |
| 1746583273 | 1929 | 1929 | Frozen Justice                 | Frozen Justice                 | Dwan, Allan                      | Allan Dwan             | tt0019907 |
| 1746520464 | 1927 | 1927 | The Long Loop on the Pecos     | The Long Loop on the Pecos     | Maloney, Leo                     | Leo D. Maloney         | tt0018101 |
| 1746584754 | 1928 | 1928 | Hold 'Em Yale                  | Hold 'Em Yale                  | Griffith, Edward H.              | Edward H. Griffith     | tt0019009 |
| 1746200020 | 1969 | 1969 | Shark!                         | Shark                          | Fuller, Samuel; Portillo, Rafael | Samuel Fuller          | tt0066365 |
| 1746454192 | 1995 | 1995 | Congo                          | Congo                          | Marshall, Frank                  | Frank Marshall         | tt0112715 |
| 1746497289 | 1919 | 1919 | Eastward Ho!                   | Eastward Ho!                   | Flynn, Emmett J.                 | Emmett J. Flynn        | tt0011145 |
| 1746573870 | 1960 | 1960 | Swiss Family Robinson          | Swiss Family Robinson          | Annakin, Ken                     | Ken Annakin            | tt0054357 |
| 1746408479 | 1990 | 1990 | Back to the Future Part III    | Back to the Future Part III    | Zemeckis, Robert                 | Robert Zemeckis        | tt0099088 |
| 1746516294 | 1920 | 1920 | Rio Grande                     | Rio Grande                     | Carewe, Edwin                    | Edwin Carewe           | tt0011630 |
| 1745359277 | 2010 | 2010 | Legion                         | Legion                         | Stewart, Scott                   | Scott Stewart          | tt1038686 |
| 1746582582 | 1939 | 1939 | The Cisco Kid and the Lady     | The Cisco Kid and the Lady     | Leeds, Herbert I.                | Herbert I. Leeds       | tt0032341 |
| 1746582267 | 1931 | 1931 | Monkey Business                | Donkey Business                | McLeod, Norman                   | Arthur Hurley          | tt0026290 |
| 1746524304 | 1923 | 1923 | While Paris Sleeps             | While Paris Sleeps             | Tourneur, Maurice                | Maurice Tourneur       | tt0014602 |
| 1745360007 | 2008 | 2008 | The Dark Knight                | The Dark Knight                | Nolan, Christopher               | Christopher Nolan      | tt0468569 |
| 2007988938 | 1982 | 1982 | Basket Case                    | Basket Case                    | Henenlotter, Frank               | Frank Henenlotter      | tt0083624 |
| 1746497589 | 1921 | 1921 | Too Wise Wives                 | Too Wise Wives                 | Weber, Lois                      | Lois Weber             | tt0012769 |
| 1746454007 | 1943 | 1943 | Mr. Lucky                      | Mr. Lucky                      | Potter, H. C.                    | H.C. Potter            | tt0036174 |
| 1746496781 | 1919 | 1919 | The Day She Paid               | The Day She Paid               | Ingram, Rex                      | Rex Ingram             | tt0010056 |
| 1746524249 | 1923 | 1923 | Our Hospitality                | Our Hospitality                | Keaton, Buster; Blystone, John   | John G. Blystone       | tt0014341 |
| 1746582767 | 1936 | 1936 | Career Woman                   | Career Woman                   | Seiler, Lewis                    | Lewis Seiler           | tt0027423 |
| 1746454815 | 1946 | 1946 | Talk About a Lady              | Talk About a Lady              | Sherman, George                  | George Sherman         | tt0039008 |
| 1746569904 | 1958 | 1958 | Monster on the Campus          | Monster on the Campus          | Arnold, Jack                     | Jack Arnold            | tt0051948 |
| 1746570376 | 1934 | 1934 | The Man Who Reclaimed His Head | The Man Who Reclaimed His Head | Ludwig, Edward                   | Edward Ludwig          | tt0025453 |
| 1746580962 | 1960 | 1960 | The Rat Race                   | The Rat Race                   | Mulligan, Robert                 | Robert Mulligan        | tt0054230 |
| 1746235120 | 1966 | 1966 | The Black Klansman             | The Black Klansman             | Mikels, Ted V.                   | Ted V. Mikels          | tt0060173 |
| 1746248838 | 1974 | 1974 | Caged Heat!                    | Caged Heat                     | Demme, Jonathan                  | Jonathan Demme         | tt0071266 |
| 1746575005 | 1933 | 1933 | Best of Enemies                | Best of Enemies                | James, Rian; Craven, Frank       | Rian James             | tt0023796 |
| 1746555712 | 1956 | 1955 | The Trouble with Harry         | The Trouble with Harry         | Hitchcock, Alfred                | Alfred Hitchcock       | tt0048750 |
| 1746235909 | 1976 | 1976 | Futureworld                    | Futureworld                    | Heffron, Richard T.              | Richard T. Heffron     | tt0074559 |
| 1746585415 | 1940 | 1940 | Money and the Woman            | Money and the Woman            | Howard, William K.               | William K. Howard      | tt0032806 |
| 1746499895 | 1946 | 1946 | Notorious                      | Notorious                      | Hitchcock, Alfred                | Alfred Hitchcock       | tt0038787 |
| 1746500502 | 1924 | 1924 | A Girl of the Limberlost       | A Girl of the Limberlost       | Meehan, James Leo                | James Leo Meehan       | tt0014947 |
| 1746184821 | 1965 | 1965 | Bad Girls Go to Hell           | Bad Girls Go to Hell           |                                  | Doris Wishman          | tt0058933 |
| 1745393784 | 2008 | 2008 | Patti Smith: Dream of Life     | Patti Smith: Dream of Life     | Sebring, Steven                  | Steven Sebring         | tt0940620 |
| 1746533179 | 1914 | 1914 | The Kiss                       | The Kiss                       | Davis, Ulysses                   | Ulysses Davis          | tt0004193 |

|            |      |      |                                       |                                       |                             |                     |           |
|------------|------|------|---------------------------------------|---------------------------------------|-----------------------------|---------------------|-----------|
| 1746569807 | 1955 | 1955 | The Private War of Major Benson       | The Private War of Major Benson       | Hopper, Jerry               | Jerry Hopper        | tt0048513 |
| 1746514242 | 1915 | 1915 | The Senator                           | The Senator                           | Golden, Joseph A.           | Joseph A. Golden    | tt0006024 |
| 1746586162 | 1939 | 1939 | Torchy Blane in Chinatown             | Torchy Blane in Chinatown             | Beaudine, William           | William Beaudine    | tt0030882 |
| 1746581856 | 1928 | 1928 | The Valley of Hunted Men              | The Valley of Hunted Men              | Thorpe, Richard             | Richard Thorpe      | tt0019519 |
| 1746569900 | 1958 | 1958 | Diamond Safari                        | Diamond Safari                        | Mayer, Gerald               | Gerald Mayer        | tt0025007 |
| 1746235824 | 1979 | 1979 | H.O.T.S.                              | H.O.T.S.                              | Sindell, Gerald Seth        | Gerald Seth Sindell | tt0079257 |
| 1746436197 | 1998 | 1998 | U.S. Marshals                         | U.S. Marshals                         | Baird, Stuart               | Stuart Baird        | tt0120873 |
| 1746500685 | 1926 | 1926 | Trumpin' Trouble                      | Trumpin' Trouble                      | Thorpe, Richard             | Richard Thorpe      | tt0174288 |
| 1746497590 | 1922 | 1922 | The Lavender Bath Lady                | The Lavender Bath Lady                | Baggot, King                | King Baggot         | tt0013306 |
| 1746556030 | 1956 | 1956 | The Opposite Sex                      | The Opposite Sex                      | Miller, David               | David Miller        | tt0049578 |
| 1746476200 | 1946 | 1946 | The Razor's Edge                      | The Razor's Edge                      | Goulding, Edmund            | Edmund Goulding     | tt0038873 |
| 1746584056 | 1936 | 1936 | They Met in a Taxi                    | They Met in a Taxi                    | Green, Alfred E.            | Alfred E. Green     | tt0028357 |
| 1746581265 | 1962 | 1962 | Stagecoach to Dancers' Rock           | Stagecoach to Dancers' Rock           | Bellamy, Earl               | Earl Bellamy        | tt0056522 |
| 1746497292 | 1922 | 1922 | Another Man's Boots                   | Another Man's Boots                   | Craft, William J.           | William James Craft | tt0011927 |
| 1746582989 | 1938 | 1938 | The Utah Trail                        | Utah Trail                            | Herman, Al                  | Albert Herman       | tt0030921 |
| 1746532708 | 1923 | 1923 | Other Men's Daughters                 | Other Men's Daughters                 | Wilson, Ben                 | Ben F. Wilson       | tt0014340 |
| 1746475954 | 1943 | 1942 | We Are the Marines                    | We Are the Marines                    | Rochemont, Louis de         | Louis De Rochemont  | tt0035534 |
| 1746440024 | 1997 | 1997 | Dangerous Ground                      | Dangerous Ground                      | Roodt, Darrell James        | Darrell Roodt       | tt0118927 |
| 1746511771 | 1923 | 1923 | The Scarlet Car                       | The Scarlet Car                       | Paton, Stuart               | Stuart Paton        | tt0014441 |
| 1746508939 | 1948 | 1948 | The Olympic Cavalcade                 | Olympic Cavalcade                     |                             |                     | tt6241040 |
| 1769972172 | 1961 | 1961 | Operation Bottleneck                  | Operation Bottleneck                  | Cahn, Edward L.             | Edward L. Cahn      | tt0055260 |
| 1746507571 | 1926 | 1926 | Exclusive Rights                      | Exclusive Rights                      | O'Connor, Frank             | Frank O'Connor      | tt0016831 |
| 1746439460 | 1994 | 1994 | Night of the Demons 2                 | Night of the Demons 2                 | Trenchard-Smith, Brian      | Brian Trenchard     | tt0110667 |
| 1746465337 | 1945 | 1945 | Conflict                              | Conflict                              | Bernhardt, Curtis           | Curtis Bernhardt    | tt0037611 |
| 1746582063 | 1929 | 1929 | The Devil's Apple Tree                | The Devil's Apple Tree                | Clifton, Elmer              | Elmer Clifton       | tt0019816 |
| 1746574030 | 1957 | 1957 | Outlaw's Son                          | Outlaw's Son                          | Selander, Lesley            | Lesley Selander     | tt0050812 |
| 1746513046 | 1916 | 1916 | Manhattan Madness                     | Manhattan Madness                     | Dwan, Allan                 | Allan Dwan          | tt0007031 |
| 1746487041 | 1918 | 1918 | Good Night, Paul                      | Good Night, Paul                      | Edwards, Walter             | Walter Edwards      | tt0009124 |
| 1745357982 | 2004 | 2004 | Win a Date with Tad Hamilton!         | Win a Date with Tad Hamilton!         | Luketic, Robert             | Robert Luketic      | tt0335559 |
| 1746584765 | 1929 | 1929 | The Iron Mask                         | The Iron Mask                         | Dwan, Allan                 | Allan Dwan          | tt0020030 |
| 1746545346 | 1940 | 1940 | One Man's Law                         | One Man's Law                         | Sherman, George             | George Sherman      | tt0032870 |
| 1746508189 | 1924 | 1924 | K--The Unknown                        | K--The Unknown                        | Pollard, Harry              | Harry A. Pollard    | tt0015030 |
| 1746524016 | 1916 | 1916 | Whoso Findeth a Wife                  | Whoso Findeth a Wife                  | Crane, Frank                | Frank Hall Crane    | tt0007564 |
| 1746394703 | 1987 | 1987 | Munchies                              | Munchies                              | Hirsch, Bettina             | Tina Hirsch         | tt0093582 |
| 1746583660 | 1928 | 1927 | The Call of the Sea                   | The Call of the Sea                   | Hall, Harold L.             | Harold R. Hall      | tt0423934 |
| 1746582010 | 1929 | 1929 | Redskin                               | Redskin                               | Schertzing, Victor          | Victor Schertzing   | tt0020320 |
| 1746422508 | 1996 | 1996 | Original Gangstas                     | Original Gangstas                     | Cohen, Larry                | Larry Cohen         | tt0117260 |
| 1746393498 | 1980 | 1980 | Heaven's Gate                         | Heaven's Gate                         | Cimino, Michael             | Michael Cimino      | tt0080855 |
| 1746581885 | 1929 | 1929 | Bad Men's Money                       | Bad Men's Money                       | McGowan, J. P.              | J.P. McGowan        | tt0019672 |
| 1746438288 | 1943 | 1943 | Man of Courage                        | Man of Courage                        | Thurn-Taxis, Alexis         | Alexis Thurn        | tt0036136 |
| 1746560661 | 1932 | 1932 | Speak Easily                          | Sneak Easily                          | Sedgwick, Edward            | Gus Meins           | tt0023490 |
| 1746219562 | 1971 | 1971 | A Gunfight                            | A Gunfight                            | Johnson, Lamont             | Lamont Johnson      | tt0067168 |
| 1746436685 | 1943 | 1943 | Honeymoon Lodge                       | Honeymoon Lodge                       | Lilley, Edward              | Edward C. Lilley    | tt0036013 |
| 1746464959 | 1942 | 1942 | The Big Shot                          | The Big Shot                          | Seiler, Lewis               | Lewis Seiler        | tt0034513 |
| 1746580718 | 1937 | 1937 | Roll Along Cowboy                     | Roll Along, Cowboy                    | Meins, Gus                  | Gus Meins           | tt0030688 |
| 1746232936 | 1969 | 1969 | Marlowe                               | Marlowe                               | Bogart, Paul                | Paul Bogart         | tt0064638 |
| 1746573732 | 1961 | 1961 | The Honeymoon Machine                 | The Honeymoon Machine                 | Thorpe, Richard             | Richard Thorpe      | tt0054989 |
| 1746453478 | 1941 | 1941 | Sierra Sue                            | Sierra Sue                            | Morgan, William             | William Morgan      | tt0034187 |
| 1746282391 | 1980 | 1980 | Any Which Way You Can                 | Any Which Way You Can                 | Van Horn, Buddy             | Buddy Van Horn      | tt0080377 |
| 1769970748 | 1915 | 1915 | The Voice in the Wilderness           | A Voice in the Wilderness             |                             | James W. Horne      | tt3140184 |
| 1746248289 | 1966 | 1966 | A Smell of Honey, a Swallow of Brine! | A Smell of Honey, a Swallow of Brine! | Elliott, B. Ron             | Byron Mabe          | tt0180177 |
| 1746499943 | 1948 | 1948 | Big City                              | Big City                              | Taugog, Norman              | Norman Taugog       | tt0040159 |
| 1746562303 | 1956 | 1956 | I've Lived Before                     | I've Lived Before                     | Bartlett, Richard           | Richard Bartlett    | tt0049353 |
| 1746500505 | 1950 | 1951 | Law of the Badlands                   | Law of the Badlands                   | Selander, Lesley            | Lesley Selander     | tt0042667 |
| 1746492230 | 1944 | 1944 | End of the Road                       | End of the Road                       | Blair, George               | George Blair        | tt0036790 |
| 1746410568 | 1983 | 1983 | Strange Brew                          | Strange Brew                          | Thomas, Dave; Moranis, Rick | Rick Moranis        | tt0086373 |
| 1746532839 | 1914 | 1914 | The Virginian                         | The Virginian                         |                             | Cecil B. DeMille    | tt0004766 |

|            |      |      |                                |                                |                               |                        |           |
|------------|------|------|--------------------------------|--------------------------------|-------------------------------|------------------------|-----------|
| 1746501450 | 1915 | 1915 | A Woman's Resurrection         | A Woman's Resurrection         | Edwards, J. Gordon            | J. Gordon Edwards      | tt0006308 |
| 1746574795 | 1933 | 1933 | Unknown Valley                 | Unknown Valley                 | Hillyer, Lambert              | Lambert Hillyer        | tt0024722 |
| 1746409459 | 1986 | 1986 | iThree Amigos!                 | iThree Amigos!                 | Landis, John                  | John Landis            | tt0092086 |
| 1746514051 | 1915 | 1915 | The Celebrated Scandal         | The Celebrated Scandal         | Durkin, James                 | James Durkin           | tt0005071 |
| 1746437017 | 1943 | 1943 | I Walked with a Zombie         | I Walked with a Zombie         | Tourneur, Jacques             | Jacques Tourneur       | tt0036027 |
| 1745372490 | 2001 | 2001 | Evolution                      | Evolution                      | Reitman, Ivan                 | Ivan Reitman           | tt0251075 |
| 1746409484 | 1988 | 1988 | Tapeheads                      | Tapeheads                      | Fishman, Bill                 | Bill Fishman           | tt0096223 |
| 1746394174 | 1992 | 1992 | Light Sleeper                  | Light Sleeper                  | Schrader, Paul                | Paul Schrader          | tt0102307 |
| 1746233509 | 1968 | 1968 | The Pick-up                    | The Pick Up                    | Frost, R. L.                  | Lee Frost              | tt0127108 |
| 1746524820 | 1928 | 1928 | A Night of Mystery             | A Night of Mystery             | Mendes, Lothar                | Lothar Mendes          | tt0019213 |
| 1769970812 | 1915 | 1915 | The Leap From the Water Tower  | The Leap from the Water Tower  |                               | J.P. McGowan           | tt1316468 |
| 1746424384 | 1941 | 1941 | Men of Boys Town               | Men of Boys Town               | Taugog, Norman                | Norman Taugog          | tt0033902 |
| 1746560319 | 1964 | 1964 | One Potato, Two Potato         | One Potato, Two Potato         | Peerce, Larry                 | Larry Peerce           | tt0058429 |
| 1746410748 | 1988 | 1988 | Bat 21                         | Bat*21                         | Markle, Peter                 | Peter Markle           | tt0094712 |
| 1746515269 | 1922 | 1922 | The Old Homestead              | The Cold Homestead             | Cruze, James                  | Arthur D.V. Storey     | tt3458410 |
| 1746465001 | 1942 | 1942 | Rio Rita                       | Rio Rita                       | Simon, S. Sylvan              | S. Sylvan Simon        | tt0035259 |
| 1746580864 | 1935 | 1935 | Fighting Youth                 | Fighting Youth                 | MacFadden, Hamilton           | Hamilton MacFadden     | tt0026356 |
| 1746199489 | 1965 | 1965 | Rapture                        | Rapture                        | Guillermin, John              | John Guillermin        | tt0059633 |
| 1746235312 | 1978 | 1978 | The Greek Tycoon               | The Greek Tycoon               | Thompson, J. Lee              | J. Lee Thompson        | tt0077636 |
| 1746513446 | 1916 | 1916 | His Picture in the Papers      | His Picture in the Papers      | Emerson, John                 | John Emerson           | tt0006809 |
| 1746573728 | 1956 | 1956 | Foreign Intrigue               | Foreign Intrigue               | Reynolds, Sheldon             | Sheldon Reynolds       | tt0049224 |
| 1746584603 | 1930 | 1930 | The Virtuous Sin               | The Virtuous Sin               | Cukor, George; Gasnier, Louis | George Cukor           | tt0021525 |
| 1746574535 | 1933 | 1933 | Peg O' My Heart                | Peg o' My Heart                | Leonard, Robert Z.            | Robert Z. Leonard      | tt0024433 |
| 1769976167 | 1928 | 1928 | Racing Mad                     | Racing Mad                     | Roberts, Stephen              | Stephen Roberts        | tt0049438 |
| 1746454112 | 2000 | 1999 | But I'm a Cheerleader          | But I'm a Cheerleader          | Babbitt, Jamie                | Jamie Babbitt          | tt0179116 |
| 1746394423 | 1990 | 1990 | House Party                    | House Party                    | Hudlin, Reginald              | Reginald Hudlin        | tt0099800 |
| 1746454607 | 1945 | 1945 | The Horn Blows at Midnight     | The Horn Blows at Midnight     | Walsh, Raoul                  | Raoul Walsh            | tt0037790 |
| 1746524970 | 1915 | 1915 | Chimmie Fadden                 | Chimmie Fadden                 | DeMille, Cecil B.             | Cecil B. DeMille       | tt0005086 |
| 1746515856 | 1920 | 1920 | Love's Flame                   | Love's Flame                   | Gregory, Carl Louis           | Carl Gregory           | tt0196720 |
| 1746524848 | 1916 | 1916 | The Men She Married            | The Men She Married            | Vale, Travers                 | Travers Vale           | tt0007056 |
| 1746465296 | 1945 | 1945 | I'll Tell the World            | I'll Tell the World            | Goodwins, Leslie              | Leslie Goodwins        | tt0037808 |
| 1746184378 | 1910 | 1910 | The Affair of an Egg           | The Affair of an Egg           | Powell, Frank                 | Frank Powell           | tt0001104 |
| 1746532634 | 1915 | 1915 | The Voice in the Fog           | The Voice in the Fog           | McGowan, J. P.                | J.P. McGowan           | tt0006230 |
| 1746566306 | 1955 | 1955 | Big House, U.S.A.              | Big House, U.S.A.              | Koch, Howard W.               | Howard W. Koch         | tt0047879 |
| 1746507621 | 1925 | 1925 | Sky's the Limit                | Sky's the Limit                | Irving, I. W.                 | Harry L. Fraser        | tt0015598 |
| 1746422622 | 1994 | 1994 | Bad Girls                      | Bar Girls                      | Kaplan, Jonathan              | Marita Giovanni        | tt0109217 |
| 1746421679 | 1993 | 1993 | The Age of Innocence           | The Age of Innocence           | Scorsese, Martin              | Martin Scorsese        | tt0106226 |
| 1746492218 | 1945 | 1945 | The Chicago Kid                | The Chicago Kid                | McDonald, Frank               | Frank McDonald         | tt0037592 |
| 1746532486 | 1915 | 1915 | The Man Trail                  | The Man Trail                  | Calvert, E. H.                | E.H. Calvert           | tt0005693 |
| 1746574536 | 1935 | 1935 | Thunder in the Night           | Thunder in the Night           | Archainbaud, George           | George Archainbaud     | tt0027105 |
| 1746504419 | 1919 | 1919 | Secret Service                 | Secret Service                 | Ford, Hugh                    | Hugh Ford              | tt0010676 |
| 1746454214 | 1943 | 1943 | A Gentle Gangster              | A Gentle Gangster              | Rosen, Phil                   | Phil Rosen             | tt0035930 |
| 1746577420 | 1959 | 1959 | A Hole in the Head             | A Hole in the Head             | Capra, Frank                  | Frank Capra            | tt0052896 |
| 1746559875 | 1964 | 1965 | Nightmare in the Sun           | Nightmare in the Sun           | Lawrence, Marc                | John Derek             | tt0059505 |
| 1746581492 | 1951 | 1951 | Canyon Raiders                 | Canyon Raiders                 | Collins, Lewis                | Lewis D. Collins       | tt0043377 |
| 1746235673 | 1976 | 1976 | The Premonition                | The Premonition                | Schnitzer, Robert Allen       | Robert Allen Schnitzer | tt0075097 |
| 1746454379 | 1942 | 1942 | Fly-by-Night                   | Fly By Night                   | Siodmak, Robert               | Robert Siodmak         | tt0034740 |
| 1746577633 | 1934 | 1934 | Little Man, What Now?          | Little Man, What Now?          | Borzage, Frank                | Frank Borzage          | tt0025408 |
| 1746569582 | 1957 | 1957 | Last Stagecoach West           | The Last Stagecoach West       | Kane, Joe                     | Joseph Kane            | tt0050624 |
| 1746578992 | 1962 | 1962 | Gypsy                          | Gypsy                          | LeRoy, Mervyn                 | Mervyn LeRoy           | tt0056048 |
| 1746570265 | 1934 | 1934 | The Notorious Sophie Lang      | The Notorious Sophie Lang      | Murphy, Ralph                 | Ralph Murphy           | tt0025577 |
| 1746577923 | 1938 | 1938 | Born to Be Wild                | Born to Be Wild                | Kane, Joe                     | Joseph Kane            | tt0029939 |
| 1746235178 | 1968 | 1968 | Fanny Hill Meets the Red Baron | Fanny Hill Meets the Red Baron | Mahon, Barry                  | Barry Mahon            | tt0218204 |
| 1746580654 | 1938 | 1938 | Stagecoach Days                | Stagecoach Days                | Levering, Joseph              | Joseph Levering        | tt0030788 |
| 1746500276 | 1924 | 1924 | Gold Heels                     | Gold Heels                     | Van Dyke, William S.          | W.S. Van Dyke          | tt0014950 |
| 1746577959 | 1937 | 1937 | Navy Spy                       | Navy Spy                       | Wilbur, Crane                 | Joseph H. Lewis        | tt0125432 |
| 1746570136 | 1952 | 1952 | Jumping Jacks                  | Jumping Jacks                  | Taugog, Norman                | Norman Taugog          | tt0044774 |



|            |      |      |                                       |                                       |                                       |                      |           |
|------------|------|------|---------------------------------------|---------------------------------------|---------------------------------------|----------------------|-----------|
| 1746209584 | 1966 | 1966 | W. I. A. (Wounded in Action)          | W.I.A. Wounded in Action              | Sunasky, Irving                       | Irving Sunasky       | tt0170795 |
| 1746524840 | 1914 | 1914 | The Man on the Box                    | The Man on the Box                    | Apfel, Oscar C.                       | Oscar Apfel          | tt0004302 |
| 1746464976 | 1947 | 1947 | The Bachelor and the Bobby Soxer      | The Bachelor and the Bobby Soxer      | Reis, Irving                          | Irving Reis          | tt0039169 |
| 1746496572 | 1919 | 1919 | The Little White Savage               | The Little White Savage               | Powell, Paul                          | Paul Powell          | tt0010372 |
| 1746578994 | 1958 | 1958 | Apache Territory                      | Apache Territory                      | Nazarro, Ray                          | Ray Nazarro          | tt0051369 |
| 1746423334 | 1993 | 1993 | The Music of Chance                   | The Music of Chance                   | Haas, Philip                          | Philip Haas          | tt0107623 |
| 1745357615 | 2009 | 2009 | Big River Man                         | Big River Man                         | Maringouin, John                      | John Maringouin      | tt0956101 |
| 1746515072 | 1918 | 1918 | The Fighting Grin                     | The Fighting Grin                     | De Grasse, Joseph                     | Joseph De Grasse     | tt0009065 |
| 1746582944 | 1940 | 1940 | Remedy for Riches                     | Remedy for Riches                     | Kenton, Erle C.                       | Erle C. Kenton       | tt0032980 |
| 1746234967 | 1967 | 1967 | Festival                              | Festival                              | Lerner, Murray                        | Murray Lerner        | tt0061658 |
| 1746474459 | 1948 | 1948 | Song of My Heart                      | Song of My Heart                      | Glazer, Benjamin                      | Benjamin Glazer      | tt0039851 |
| 1746584574 | 1929 | 1928 | In Old Arizona                        | In Old Arizona                        | Walsh, Raoul; Cummings, Irving        | Irving Cummings      | tt0020018 |
| 1746218701 | 1973 | 1973 | The Spook Who Sat by the Door         | The Spook Who Sat by the Door         | Dixon, Ivan                           | Ivan Dixon           | tt0070726 |
| 1746585033 | 1940 | 1940 | Curtain Call                          | Curtain Call                          | Woodruff, Frank                       | Frank Woodruff       | tt0032373 |
| 1746473898 | 1942 | 1942 | Klondike Fury                         | Klondike Fury                         | Howard, William K.                    | William K. Howard    | tt0034948 |
| 1746565888 | 1954 | 1954 | Sitting Bull                          | Sitting Bull                          | Salkow, Sidney                        | Sidney Salkow        | tt0047501 |
| 1746581777 | 1928 | 1927 | That's My Daddy                       | That's My Daddy                       | Newmeyer, Fred                        | Fred C. Newmeyer     | tt0019463 |
| 1746465360 | 1942 | 1942 | Tomorrow We Live                      | Tomorrow We Live                      | Ulmer, Edgar G.                       | Edgar G. Ulmer       | tt0035453 |
| 1746454481 | 1941 | 1941 | King of the Zombies                   | King of the Zombies                   | Yarbrough, Jean                       | Jean Yarbrough       | tt0033787 |
| 1746492228 | 1944 | 1943 | Swing Fever                           | Swing Fever                           | Whelan, Tim                           | Tim Whelan           | tt0037335 |
| 1746555723 | 1957 | 1957 | The Monster that Challenged the World | The Monster That Challenged the World | Laven, Arnold                         | Arnold Laven         | tt0050722 |
| 1746424170 | 1942 | 1942 | Orchestra Wives                       | Orchestra Wives                       | Mayo, Archie; Brahm, John             | Archie Mayo          | tt0035157 |
| 1745359495 | 2008 | 2008 | Beer for My Horses                    | Beer for My Horses                    | Salomon, Michael                      | Michael Salomon      | tt1178640 |
| 1746574817 | 1933 | 1933 | Strange People                        | Strange People                        | Thorpe, Richard                       | Richard Thorpe       | tt0024619 |
| 1746520929 | 1950 | 1950 | Frontier Outpost                      | Frontier Outpost                      | Nazarro, Ray                          | Ray Nazarro          | tt0042484 |
| 1746500610 | 1926 | 1926 | Dance Madness                         | Dance Madness                         | Leonard, Robert Z.                    | Robert Z. Leonard    | tt0016759 |
| 1746512587 | 1927 | 1927 | Dress Parade                          | Dress Parade                          | Crisp, Donald                         | Donald Crisp         | tt0017829 |
| 1746568163 | 1933 | 1933 | Hard to Handle                        | Hard to Handle                        | LeRoy, Mervyn                         | Mervyn LeRoy         | tt0024090 |
| 1746513711 | 1916 | 1916 | Behind Closed Doors                   | Behind Closed Doors                   | Golden, Joseph A.                     | Joseph A. Golden     | tt0157369 |
| 1746520495 | 1926 | 1926 | Dame Chance                           | Dame Chance                           | Bracken, Bertram                      | Bertram Bracken      | tt0016758 |
| 1746454175 | 1997 | 1996 | Box of Moonlight                      | Box of Moon Light                     | DiCillo, Tom                          | Tom DiCillo          | tt0115738 |
| 1746569561 | 1954 | 1954 | Athena                                | Athena                                | Thorpe, Richard                       | Richard Thorpe       | tt0046728 |
| 1745272771 | 2001 | 2000 | Before Night Falls                    | Before Night Falls                    | Schnabel, Julian                      | Julian Schnabel      | tt0247196 |
| 1746235624 | 1978 | 1978 | Starhops                              | Starhops                              | Peeters, Barbara                      | Barbara Peeters      | tt0078318 |
| 1746585183 | 1928 | 1928 | The Cloud Buster                      | The Cloud Buster                      | Moore, Vin                            | Vin Moore            | tt0321725 |
| 1746563635 | 1952 | 1952 | Hong Kong                             | Hong Kong                             | Foster, Lewis R.                      | Lewis R. Foster      | tt0043654 |
| 1746487060 | 1918 | 1918 | The Claim                             | The Claim                             | Reicher, Frank                        | Frank Reicher        | tt0008965 |
| 1746420733 | 1988 | 1988 | Bird                                  | Bird                                  | Eastwood, Clint                       | Clint Eastwood       | tt0094747 |
| 1746583013 | 1935 | 1935 | The Outlaw Deputy                     | The Outlaw Deputy                     | Brower, Otto                          | Otto Brower          | tt0026836 |
| 1746571080 | 1934 | 1934 | Here Comes the Navy                   | Here Comes the Navy                   | Bacon, Lloyd                          | Lloyd Bacon          | tt0025238 |
| 1746423491 | 1998 | 1998 | Meet the Deedles                      | Meet the Deedles                      | Boyum, Steve                          | Steve Boyum          | tt0120645 |
| 1746511739 | 1915 | 1915 | The Man Who Couldn't Beat God         | The Man Who Couldn't Beat God         | Costello, Maurice; Gaillard, Robert   | Maurice Costello     | tt0005695 |
| 1746393765 | 1987 | 1987 | Gardens of Stone                      | Gardens of Stone                      | Coppola, Francis                      | Francis Ford Coppola | tt0093073 |
| 1746409080 | 1987 | 1987 | Adventures in Babysitting             | Adventures in Babysitting             | Columbus, Chris                       | Chris Columbus       | tt0092513 |
| 1746503064 | 1916 | 1916 | The Patriot                           | The Patriot                           | Hart, William S.                      | William S. Hart      | tt0007160 |
| 1746567809 | 1933 | 1933 | Night of Terror                       | Night of Terror                       | Stoloff, Ben                          | Benjamin Stoloff     | tt0024382 |
| 1746492491 | 1945 | 1945 | The Return of the Durango Kid         | The Return of the Durango Kid         | Abrahams, Derwin                      | Derwin Abrahams      | tt0037218 |
| 1746512066 | 1910 | 1910 | St. Elmo                              | St. Elmo                              | O'Neil, Barry; Carleton, Lloyd B.     | Lloyd B. Carleton    | tt0344376 |
| 1746410882 | 1987 | 1987 | Deadly Illusion                       | Deadly Illusion                       | Tannen, William; Cohen, Larry         | Larry Cohen          | tt0092847 |
| 1746565931 | 1954 | 1954 | The Big Chase                         | The Big Chase                         | Hilton, Arthur D.                     | Arthur Hilton        | tt0046774 |
| 1745341306 | 2001 | 2001 | The Forsaken                          | The Forsaken                          | Cardone, J. S.                        | J.S. Cardone         | tt0245120 |
| 1746577349 | 1963 | 1963 | The Thrill of It All                  | The Thrill of It All                  | Jewison, Norman                       | Norman Jewison       | tt0057581 |
| 1746570722 | 1952 | 1952 | Rainbow 'Round My Shoulder            | Rainbow 'Round My Shoulder            | Quine, Richard                        | Richard Quine        | tt0045068 |
| 1746585440 | 1940 | 1940 | I Take This Woman                     | I Take This Woman                     | Van Dyke, W. S.; Sternberg, Josef von | W.S. Van Dyke        | tt0031466 |
| 1746419390 | 1982 | 1981 | Waitress!                             | Waitress!                             | Weil, Samuel; Herz, Michael           | Michael Herz         | tt0083312 |
| 1746574454 | 1934 | 1935 | The Cactus Kid                        | The Cactus Kid                        | Webb, Harry S.                        | Harry S. Webb        | tt0024942 |
| 1746524125 | 1910 | 1910 | The Unchanging Sea                    | The Unchanging Sea                    | Griffith, D. W.                       | D.W. Griffith        | tt0001431 |

|            |      |      |                             |                             |                         |                            |           |
|------------|------|------|-----------------------------|-----------------------------|-------------------------|----------------------------|-----------|
| 1746584438 | 1931 | 1931 | Platinum Blonde             | Platinum Blonde             | Capra, Frank R.         | Frank Capra                | tt0022268 |
| 1746492429 | 1945 | 1945 | Behind City Lights          | Behind City Lights          | English, John           | John English               | tt0037532 |
| 1769970066 | 1912 | 1912 | The Old Reporter            | The Old Reporter            | Miller, Ashley          | Harold M. Shaw             | tt0002403 |
| 1745342712 | 2008 | 2008 | Meet Dave                   | Meet Dave                   | Robbins, Brian          | Brian Robbins              | tt0765476 |
| 1746566760 | 1952 | 1952 | When in Rome                | When in Rome                | Brown, Clarence         | Clarence Brown             | tt0045324 |
| 1746577624 | 1936 | 1936 | These Three                 | These Three                 | Wyler, William          | William Wyler              | tt0028356 |
| 1746474985 | 1944 | 1944 | The Last Ride               | The Last Ride               | Lederman, D. Ross       | D. Ross Lederman           | tt0037007 |
| 1746475724 | 1946 | 1946 | Mysterious Intruder         | Mysterious Intruder         | Castle, William         | William Castle             | tt0038766 |
| 1746586157 | 1940 | 1940 | Military Academy            | Military Academy            | Lederman, D. Ross       | D. Ross Lederman           | tt0032793 |
| 1746585001 | 1939 | 1939 | They All Come Out           | They All Come Out           | Tourneur, Jacques       | Jacques Tourneur           | tt0032019 |
| 1746453565 | 1943 | 1942 | Journey into Fear           | Journey Into Fear           | Foster, Norman          | Norman Foster              | tt0034922 |
| 1746567251 | 1933 | 1933 | Big Time or Bust            | Big Time or Bust            | Newfield, Sam           | Sam Newfield               | tt0024891 |
| 1746524497 | 1915 | 1915 | The House of Tears          | The House of Tears          | Crane, Edwin            | Edwin Carewe               | tt0005516 |
| 1746503008 | 1910 | 1910 | The Masher                  | The Masher                  | Powell, Frank           | Frank Powell               | tt0001309 |
| 1746581053 | 1962 | 1962 | The Great Chase             | The Great Chase             |                         |                            | tt0057114 |
| 1746508903 | 1924 | 1924 | Her Marriage Vow            | Her Marriage Vow            | Webb, Millard           | Millard Webb               | tt0014129 |
| 1746580975 | 1960 | 1960 | Elmer Gantry                | Elmer Gantry                | Brooks, Richard         | Richard Brooks             | tt0053793 |
| 1746566748 | 1933 | 1933 | Via Pony Express            | Via Pony Express            | Collins, Lew            | Lewis D. Collins           | tt0024730 |
| 1746573783 | 1958 | 1957 | The Golden Age of Comedy    | The Golden Age of Comedy    |                         | Robert Youngson            | tt0129119 |
| 1746454319 | 1996 | 1996 | The Adventures of Pinocchio | The Adventures of Pinocchio | Barron, Steve           | Steve Barron               | tt0115472 |
| 1746580596 | 1937 | 1937 | The Shadow Strikes          | The Shadow Strikes          | Shores, Lynn            | Lynn Shores                | tt0029542 |
| 1746491726 | 1945 | 1945 | Come Out Fighting           | Come Out Fighting           | Beaudine, William       | William Beaudine           | tt0037609 |
| 1746200220 | 1969 | 1969 | Number One                  | Number One                  | Gries, Tom              | Tom Gries                  | tt0064743 |
| 1746421252 | 1994 | 1994 | Natural Born Killers        | Natural Born Killers        | Stone, Oliver           | Oliver Stone               | tt0110632 |
| 1746563670 | 1952 | 1952 | Springfield Rifle           | Springfield Rifle           | DeToth, Andre           | André De Toth              | tt0045184 |
| 1746571178 | 1910 | 1910 | For the Sunday Edition      | For the Sunday Edition      |                         |                            | tt1480766 |
| 1746520058 | 1925 | 1925 | Fast Fightin'               | Fast Fightin'               | Thorpe, Richard         | Richard Thorpe             | tt0015795 |
| 1746453854 | 1941 | 1941 | Sun Valley Serenade         | Sun Valley Serenade         | Humberstone, H. Bruce   | H. Bruce Humberstone       | tt0034241 |
| 1746423796 | 1941 | 1941 | H. M. Pulham, Esq.          | H.M. Pulham, Esq.           | Vidor, King             | King Vidor                 | tt0033686 |
| 1746574669 | 1936 | 1936 | The Fugitive Sheriff        | The Fugitive Sheriff        | Bennett, Spencer Gordon | Spencer Gordon Bennet      | tt0027650 |
| 1746561744 | 1957 | 1957 | Lure of the Swamp           | Lure of the Swamp           | Cornfield, Hubert       | Hubert Cornfield           | tt0050661 |
| 1746583496 | 1951 | 1951 | The First Legion            | The First Legion            | Sirk, Douglas           | Douglas Sirk               | tt0043537 |
| 1746576007 | 1910 | 1910 | Faithful                    | Faithful                    | Griffith, D. W.         | D.W. Griffith              | tt0001207 |
| 1746500137 | 1925 | 1925 | Broadway Lady               | Broadway Lady               | Ruggles, Wesley         | Wesley Ruggles             | tt0015647 |
| 1746574634 | 1935 | 1935 | Break of Hearts             | Break of Hearts             | Moeller, Philip         | Philip Moeller             | tt0026134 |
| 1746419171 | 1994 | 1994 | D2: The Mighty Ducks        | D2: The Mighty Ducks        | Weisman, Sam            | Sam Weisman                | tt0109520 |
| 1769970813 | 1912 | 1912 | Is He Eligible              | Is He Eligible?             |                         | C.J. Williams              | tt0483689 |
| 1746502710 | 1916 | 1916 | Hesper of the Mountains     | Hesper of the Mountains     | North, Wilfrid          | Wilfrid North              | tt0157752 |
| 1746583021 | 1935 | 1935 | The Black Room              | The Black Room              | Neill, R. William       | Roy William Neill          | tt0026123 |
| 1745342049 | 2003 | 2003 | View from the Top           | View from the Top           | Barreto, Bruno          | Bruno Barreto              | tt0264150 |
| 1746580911 | 1937 | 1937 | The Holy Terror             | The Holy Terror             | Tinling, James          | James Tinling              | tt0029014 |
| 1746520840 | 1925 | 1925 | The Road to Yesterday       | The Road to Yesterday       |                         | Cecil B. DeMille           | tt0016294 |
| 1746219362 | 1973 | 1973 | The Cheerleaders            | The Cheerleaders            | Glicker, Paul           | Paul Glickler              | tt0068364 |
| 1746566241 | 1957 | 1957 | Utah Blaine                 | Utah Blaine                 | Sears, Fred F.          | Fred F. Sears              | tt0051145 |
| 1746553944 | 1965 | 1965 | War Party                   | War Party                   | Selander, Lesley        | Lesley Selander            | tt0229029 |
| 1746523430 | 1923 | 1923 | Three Wise Fools            | Three Wise Fools            | Vidor, King             | King Vidor                 | tt0014542 |
| 1746436898 | 1998 | 1997 | Nightwatch                  | Nightwatch                  | Bornedal, Ole           | Ole Bornedal               | tt0119791 |
| 1746500058 | 1950 | 1950 | The Jackpot                 | The Jackpot                 | Lang, Walter            | Walter Lang                | tt0042610 |
| 1746465244 | 1945 | 1945 | Frisco Sal                  | Frisco Sal                  | Waggoner, George        | George Waggoner            | tt0037717 |
| 1746218680 | 1971 | 1971 | something big               | Something Big               | McLaglen, Andrew V.     | Andrew V. McLaglen         | tt0068022 |
| 1746542663 | 1927 | 1927 | Snowbound                   | Snowbound                   | Stone, Phil             | Phil Goldstone             | tt0018421 |
| 1746394514 | 1982 | 1982 | The Seduction               | The Seduction               | Schmoeller, David       | David Schmoeller           | tt0084652 |
| 1746503761 | 1920 | 1920 | A Thousand to One           | A Thousand to One           | Lee, Rowland V.         | Rowland V. Lee             | tt0012751 |
| 1746566134 | 1956 | 1956 | Magic Fire                  | Magic Fire                  | Dieterle, William       | William Dieterle           | tt0049461 |
| 1745373168 | 2008 | 2008 | Nothing Like the Holidays   | Nothing Like the Holidays   | De Villa, Alfredo       | Alfredo Rodriguez de Villa | tt1151915 |
| 1746500006 | 1948 | 1948 | Sundown in Santa Fe         | Sundown in Santa Fe         | Springsteen, R. G.      | R.G. Springsteen           | tt0040850 |
| 1746525031 | 1920 | 1920 | Blind Love                  | Blind Love                  | Bailey, Oliver D.       | Oliver D. Bailey           | tt0186886 |

|            |      |      |                                               |                                          |                                |                        |           |
|------------|------|------|-----------------------------------------------|------------------------------------------|--------------------------------|------------------------|-----------|
| 1769971965 | 1969 | 1969 | Uta                                           | Uta                                      |                                | Nick Millard           | tt0260488 |
| 1746423558 | 1997 | 1997 | Donnie Brasco                                 | Donnie Brasco                            | Newell, Mike                   | Mike Newell            | tt0119008 |
| 1746520300 | 1948 | 1948 | The Vicious Circle                            | The Vicious Circle                       | Wilder, W. Lee                 | W. Lee Wilder          | tt0040941 |
| 1745342282 | 2004 | 2004 | The Whole Ten Yards                           | The Whole Ten Yards                      | Deutch, Howard                 | Howard Deutch          | tt0327247 |
| 1746520892 | 1949 | 1949 | Mighty Joe Young                              | Mighty Joe Young                         | Schoedsack, Ernest B.          | Ernest B. Schoedsack   | tt0041650 |
| 1746574968 | 1938 | 1938 | Cassidy of Bar 20                             | Cassidy of Bar 20                        | Selander, Lesley               | Lesley Selander        | tt0029976 |
| 1746474468 | 1947 | 1947 | The Unsuspected                               | The Unsuspected                          | Curtiz, Michael                | Michael Curtiz         | tt0039941 |
| 1746497004 | 1918 | 1918 | The Eyes of Julia Deep                        | The Eyes of Julia Deep                   | Ingraham, Lloyd                | Lloyd Ingraham         | tt0009047 |
| 1746500178 | 1924 | 1924 | In Fast Company                               | In Fast Company                          | Horne, James W.                | James W. Horne         | tt0123906 |
| 1746532628 | 1914 | 1914 | Three Weeks                                   | Three Weeks                              | Vekroff, Perry N.              | Perry N. Vekroff       | tt0004698 |
| 1746524823 | 1923 | 1923 | The Six-Fifty                                 | The Six Fifty                            | Ross, Nat                      | Nat Ross               | tt0014479 |
| 1746584654 | 1929 | 1929 | From Headquarters                             | From Headquarters                        | Bretherton, Howard             | Howard Bretherton      | tt0019906 |
| 1746577777 | 1938 | 1938 | Arsène Lupin Returns                          | Arsène Lupin Returns                     | Fitzmaurice, Geo.              | George Fitzmaurice     | tt0029884 |
| 1746198730 | 1969 | 1969 | The Girl Who Knew Too Much                    | The Girl Who Knew Too Much               | Lyon, Francis D.               | Francis D. Lyon        | tt0064370 |
| 1746474834 | 1947 | 1947 | Robin Hood of Texas                           | Robin Hood of Texas                      | Selander, Lesley               | Lesley Selander        | tt0039780 |
| 1746435336 | 1999 | 1999 | Flawless                                      | Flawless                                 | Schumacher, Joel               | Joel Schumacher        | tt0155711 |
| 1745358527 | 2010 | 2010 | The Craziest                                  | The Craziest                             | Eisner, Breck                  | Breck Eisner           | tt0455407 |
| 1746571576 | 1932 | 1932 | A Successful Calamity                         | A Successful Calamity                    | Adolfi, John G.                | John G. Adolfi         | tt0023537 |
| 1746423562 | 1991 | 1991 | The Pit and the Pendulum                      | The Pit and the Pendulum                 | Gordon, Stuart                 | Stuart Gordon          | tt0100369 |
| 1746578680 | 1962 | 1962 | The Cabinet of Caligari                       | The Cabinet of Caligari                  | Kay, Roger                     | Roger Kay              | tt0055819 |
| 1746509264 | 1924 | 1924 | The Perfect Flapper                           | The Perfect Flapper                      | Dillon, John Francis           | John Francis Dillon    | tt0015221 |
| 1746420806 | 1982 | 1981 | Evilspeak                                     | Evilspeak                                | Weston, Eric                   | Eric Weston            | tt0082346 |
| 1746570213 | 1933 | 1933 | Sailor's Luck                                 | Sailor's Luck                            | Walsh, Raoul                   | Raoul Walsh            | tt0024518 |
| 1746577779 | 1936 | 1936 | Everyman's Law                                | Everyman's Law                           | Ray, Albert                    | Albert Ray             | tt0027588 |
| 1746217332 | 1967 | 1967 | The Girl, The Body, and The Pill              | The Girl, the Body, and the Pill         | Lewis, Herschell Gordon        | Herschell Gordon Lewis | tt0061712 |
| 1746569579 | 1953 | 1953 | Take Me to Town                               | Take Me to Town                          | Sirk, Douglas                  | Douglas Sirk           | tt0046397 |
| 1746574066 | 1956 | 1956 | Forbidden Planet                              | Forbidden Planet                         | Wilcox, Fred McLeod            | Fred M. Wilcox         | tt0049223 |
| 1746503467 | 1922 | 1922 | The Five Dollar Baby                          | The Five Dollar Baby                     | Beaumont, Harry                | Harry Beaumont         | tt0013131 |
| 1746497218 | 1919 | 1919 | Human Passions                                | Human Passions                           | Tyrol, Jacques                 | Jacques Tyrol          | tt0190468 |
| 1746474519 | 1948 | 1948 | Belle Starr's Daughter                        | Belle Starr's Daughter                   | Selander, Lesley               | Lesley Selander        | tt0040154 |
| 1746523814 | 1910 | 1910 | A Sleep Walking Cure                          | A Sleep Walking Cure                     |                                |                        | tt1371147 |
| 1746509040 | 1950 | 1950 | Girls' School                                 | Girls' School                            | Landers, Lew                   | Lew Landers            | tt0042507 |
| 1746503416 | 1918 | 1918 | The World for Sale                            | The World for Sale                       | Blackton, J. Stuart            | J. Stuart Blackton     | tt0009840 |
| 1746515108 | 1920 | 1920 | Nineteen and Phyllis                          | Nineteen and Phyllis                     | De Grasse, Joseph              | Joseph De Grasse       | tt0012503 |
| 1746465166 | 1947 | 1947 | News Hounds                                   | News Hounds                              | Beaudine, William              | William Beaudine       | tt0039656 |
| 1745341030 | 2002 | 2002 | Far from Heaven                               | Far from Heaven                          | Haynes, Todd                   | Todd Haynes            | tt0297884 |
| 1746583044 | 1936 | 1936 | Smartest Girl in Town                         | Smartest Girl in Town                    | Santley, Joseph                | Joseph Santley         | tt0028270 |
| 1746570396 | 1934 | 1934 | Sons of Steel                                 | Sons of Steel                            | Lamont, Charles                | Charles Lamont         | tt0027026 |
| 1746501931 | 1915 | 1915 | At the Flood-Tide                             | At the Flood Tide                        | Oliver, Guy                    | Guy Oliver             | tt0413775 |
| 1746581241 | 1951 | 1951 | Secrets of Beauty                             | Secrets of Beauty                        | Kenton, Erle C.                | Erle C. Kenton         | tt0228830 |
| 1746419791 | 1987 | 1987 | Flowers in the Attic                          | Flowers in the Attic                     | Bloom, Jeffrey; Bloom, Jeffrey | Jeffrey Bloom          | tt0093036 |
| 1746513793 | 1923 | 1923 | Mighty Lak' a Rose                            | Mighty Lak' a Rose                       | Carewe, Edwin                  | Edwin Carewe           | tt0014276 |
| 1746520728 | 1949 | 1949 | Ranger of Cherokee Strip                      | Ranger of Cherokee Strip                 | Ford, Philip                   | Philip Ford            | tt0041783 |
| 1746422119 | 1995 | 1995 | Mallrats                                      | Mallrats                                 | Smith, Kevin                   | Kevin Smith            | tt0113749 |
| 1746583832 | 1929 | 1929 | Skin Deep                                     | Skin Deep                                | Enright, Ray                   | Ray Enright            | tt0020415 |
| 1746257935 | 1976 | 1976 | Mother, Jugs & Speed                          | Mother, Jugs & Speed                     | Yates, Peter                   | Peter Yates            | tt0074923 |
| 1746504025 | 1917 | 1917 | '49 '17                                       | '49 '17                                  | Baldwin, Ruth Ann              | Ruth Ann Baldwin       | tt0007610 |
| 1746580380 | 1938 | 1938 | Squadron of Honor                             | Squadron of Honor                        | Coleman, C. C.                 | Charles C. Coleman     | tt0030785 |
| 1746562410 | 1953 | 1953 | The Master of Ballantrae                      | The Master of Ballantrae                 | Keighley, William              | William Keighley       | tt0046054 |
| 1746419401 | 1982 | 1982 | Smithereens                                   | Smithereens                              | Seidelman, Susan               | Susan Seidelman        | tt0084698 |
| 1746424045 | 1940 | 1940 | Earthbound                                    | Earthbound                               | Pichel, Irving                 | Irving Pichel          | tt0032427 |
| 1746514576 | 1916 | 1916 | The Mediator                                  | The Mediator                             | Turner, Otis                   | Otis Turner            | tt0007051 |
| 1745373422 | 2008 | 2008 | Baghead                                       | Baghead                                  | Duplass, Jay; Duplass, Mark    | Jay Duplass            | tt0923600 |
| 1746574929 | 1938 | 1938 | Air Devils                                    | Air Devils                               | Rawlins, John                  | John Rawlins           | tt0029847 |
| 1746583176 | 1936 | 1936 | With Love and Kisses                          | With Love and Kisses                     | Goodwins, Les                  | Leslie Goodwins        | tt0029787 |
| 1746581521 | 1951 | 1951 | The Man with a Cloak                          | The Man with a Cloak                     | Markle, Fletcher               | Fletcher Markle        | tt0043782 |
| 1746200351 | 1966 | 1966 | A Funny Thing Happened on the Way to the Foru | A Funny Thing Happened on the Way to the | Lester, Richard                | Richard Lester         | tt0060438 |

|            |      |      |                                 |                                 |                             |                                     |           |
|------------|------|------|---------------------------------|---------------------------------|-----------------------------|-------------------------------------|-----------|
| 1746584480 | 1929 | 1929 | Jealousy                        | Jealousy                        | De Limur, Jean              | Jean de Limur                       | tt0020043 |
| 1746573758 | 1959 | 1959 | Face of Fire                    | Face of Fire                    | Band, Albert                | Albert Band                         | tt0052793 |
| 1746492712 | 1944 | 1944 | Trocadero                       | Trocadero                       | Nigh, William               | William Nigh                        | tt0037399 |
| 1746575020 | 1934 | 1934 | Lazy River                      | Lazy River                      | Seitz, George B.            | George B. Seitz                     | tt0025375 |
| 1746575541 | 1931 | 1931 | Strangers May Kiss              | Strangers May Kiss              | Fitzmaurice, George         | George Fitzmaurice                  | tt0022435 |
| 1746437412 | 1942 | 1942 | Mexican Spitfire's Elephant     | Mexican Spitfire's Elephant     | Goodwins, Leslie            | Leslie Goodwins                     | tt0035061 |
| 1746501774 | 1915 | 1915 | Courtmartialed                  | Courtmartialed                  | Paton, Stuart               | Stuart Paton                        | tt0005148 |
| 1746454581 | 1998 | 1998 | Living Out Loud                 | Living Out Loud                 | LaGravenese, Richard        | Richard LaGravenese                 | tt0120722 |
| 1746577228 | 1950 | 1950 | The Next Voice You Hear         | The Next Voice You Hear...      | Wellman, William A.         | William A. Wellman                  | tt0042786 |
| 1746485526 | 1919 | 1919 | Bonds of Love                   | Bonds of Love                   | Barker, Reginald            | Reginald Barker                     | tt0009952 |
| 1746453918 | 1996 | 1996 | Mother                          | Mother                          | Brooks, Albert              | Albert Brooks                       | tt0117091 |
| 1746571350 | 1932 | 1932 | The Lost Squadron               | The Lost Squadron               | Archainbaud, George         | George Archainbaud                  | tt0023151 |
| 1746501238 | 1915 | 1915 | Over Night                      | Over Night                      | Young, James                | James Young                         | tt0005856 |
| 1746577634 | 1936 | 1936 | The Sky Parade                  | Sky Parade                      | Lovering, Otho              | Otho Lovering                       | tt0028264 |
| 1746569806 | 1958 | 1958 | Ride a Crooked Trail            | Ride a Crooked Trail            | Hibbs, Jesse                | Jesse Hibbs                         | tt0052135 |
| 1746503617 | 1918 | 1918 | The Rough Lover                 | The Rough Lover                 | De Grasse, Joseph           | Joseph De Grasse                    | tt0009570 |
| 1746494244 | 1910 | 1910 | Western Chivalry                | Western Chivalry                |                             | Gilbert M. 'Broncho Billy' Anderson | tt0001448 |
| 1746575042 | 1936 | 1936 | Love on the Run                 | Love on the Run                 | Van Dyke, W. S.             | W.S. Van Dyke                       | tt0027914 |
| 1746475254 | 1947 | 1947 | Deep Valley                     | Deep Valley                     | Negulesco, Jean             | Jean Negulesco                      | tt0039308 |
| 1746392918 | 1984 | 1984 | Cloak & Dagger                  | Cloak & Dagger                  | Franklin, Richard           | Richard Franklin                    | tt0087065 |
| 1746509346 | 1926 | 1925 | Red Blood                       | Red Blood                       | McGowan, J. P.              | J.P. McGowan                        | tt0017316 |
| 1746584920 | 1940 | 1940 | Wyoming                         | Wyoming                         | Thorpe, Richard             | Richard Thorpe                      | tt0033276 |
| 1746571677 | 1931 | 1931 | My Past                         | My Past                         | Del Ruth, Roy               | Roy Del Ruth                        | tt0022177 |
| 1746562477 | 1955 | 1955 | The Man from Bitter Ridge       | The Man from Bitter Ridge       | Arnold, Jack; Daniels, Jack | Jack Arnold                         | tt0048341 |
| 1746570825 | 1933 | 1933 | Storm at Daybreak               | Storm at Daybreak               | Boleslavsky, Richard        | Richard Boleslawski                 | tt0024616 |
| 1746582876 | 1936 | 1936 | Song and Dance Man              | Song and Dance Man              | Dwan, Allan                 | Allan Dwan                          | tt0028280 |
| 1746464800 | 1942 | 1942 | The Old Chisholm Trail          | The Old Chisholm Trail          | Clifton, Elmer              | Elmer Clifton                       | tt0036232 |
| 1746570464 | 1934 | 1934 | Murder in Trinidad              | Murder in Trinidad              | King, Louis                 | Louis King                          | tt0025526 |
| 1746576991 | 1963 | 1963 | Harbor Lights                   | Harbor Lights                   | Dexter, Maury               | Maury Dexter                        | tt0057125 |
| 1746583345 | 1951 | 1951 | Pickup                          | Pickup                          | Haas, Hugo                  | Hugo Haas                           | tt0043919 |
| 1746582926 | 1935 | 1935 | The Girl Who Came Back          | The Girl Who Came Back          | Lamont, Charles             | Charles Lamont                      | tt0026412 |
| 1746567796 | 1952 | 1952 | Here Come the Nelsons           | Here Come the Nelsons           | Cordova, Frederick de       | Frederick De Cordova                | tt0044701 |
| 1746435865 | 1991 | 1991 | 29th Street                     | 29th Street                     | Gallo, George               | George Gallo                        | tt0101252 |
| 1746500228 | 1946 | 1946 | Landrush                        | Landrush                        | Keays, Vernon               | Vernon Keays                        | tt0038681 |
| 1746582601 | 1936 | 1936 | Reunion                         | Reunion                         | Taugog, Norman              | Norman Taurog                       | tt0028173 |
| 1746508380 | 1926 | 1925 | False Pride                     | False Pride                     | Dierker, Hugh               | Hugh Dierker                        | tt0131380 |
| 1746454843 | 1946 | 1946 | God's Country                   | God's Country                   | Tansey, Robert              | Robert Emmett Tansey                | tt0038567 |
| 1746422314 | 1998 | 1998 | The Waterboy                    | The Waterboy                    | Coraci, Frank               | Frank Coraci                        | tt0120484 |
| 1746508730 | 1925 | 1925 | That Old Gang of Mine           | That Old Gang of Mine           | Tully, May                  | May Tully                           | tt0016419 |
| 1746577135 | 1961 | 1961 | Voyage to the Bottom of the Sea | Voyage to the Bottom of the Sea | Allen, Irwin                | Irwin Allen                         | tt0055608 |
| 1746454847 | 1941 | 1941 | The Lone Rider Rides On         | The Lone Rider Rides On         | Newfield, Samuel            | Sam Newfield                        | tt0033844 |
| 1746424044 | 1943 | 1943 | Beyond the Last Frontier        | Beyond the Last Frontier        | Bretherton, Howard          | Howard Bretherton                   | tt0035676 |
| 1746574689 | 1935 | 1935 | Stormy                          | Stormy                          | Friedlander, Louis          | Lew Landers                         | tt0027047 |
| 1746583304 | 1951 | 1951 | Pride of Maryland               | The Pride of Maryland           | Ford, Philip                | Philip Ford                         | tt0043933 |
| 1746583231 | 1951 | 1951 | Quebec                          | Quebec                          | Templeton, George           | George Templeton                    | tt0043946 |
| 1746572279 | 1931 | 1931 | Maker of Men                    | Maker of Men                    | Sedgwick, Edward            | Edward Sedgwick                     | tt0022109 |
| 1746508495 | 1924 | 1924 | American Manners                | American Manners                | Horne, James W.             | James W. Horne                      | tt0014673 |
| 1746572857 | 1931 | 1931 | Puss in Boots                   | Puss in Boots                   |                             | M.J. Weisfeldt                      | tt6427418 |
| 1745282819 | 2005 | 2005 | The Producers                   | The Producers                   | Stroman, Susan              | Susan Stroman                       | tt0395251 |
| 1746582501 | 1935 | 1935 | The Whole Town's Talking        | The Whole Town's Talking        | Ford, John                  | John Ford                           | tt0027214 |
| 1746516623 | 1922 | 1922 | Reckless Chances                | Reckless Chances                | McGowan, J. P.              | J.P. McGowan                        | tt0013537 |
| 1746491873 | 1946 | 1946 | Shadows Over Chinatown          | Shadows Over Chinatown          | Morse, Terry                | Terry O. Morse                      | tt0038929 |
| 1746508374 | 1926 | 1926 | A Trip to Chinatown             | A Trip to Chinatown             | Kerr, Robert P.             | Robert P. Kerr                      | tt0017484 |
| 1746235002 | 1967 | 1967 | The Love-Ins                    | The Love Ins                    | Dreifuss, Arthur            | Arthur Dreifuss                     | tt0061922 |
| 1746570434 | 1934 | 1934 | A Demon for Trouble             | A Demon for Trouble             | Hill, Bob                   | Robert F. Hill                      | tt0025041 |
| 1746573798 | 1960 | 1960 | G.I. Blues                      | G.I. Blues                      | Taugog, Norman              | Norman Taurog                       | tt0053848 |
| 1746583951 | 1930 | 1930 | Mother's Cry                    | Mothers Cry                     | Henley, Hobart              | Hobart Henley                       | tt0021159 |

|            |      |      |                               |                               |                        |                       |           |
|------------|------|------|-------------------------------|-------------------------------|------------------------|-----------------------|-----------|
| 1746565984 | 1954 | 1953 | El Alamein                    | El Alaméin                    | Sears, Fred F.         | Fred F. Sears         | tt0045725 |
| 1746502404 | 1915 | 1915 | The Runaway Wife              | The Runaway Wife              | Buel, Kenean           | Kenean Buel           | tt0005989 |
| 1746421071 | 1992 | 1992 | Titanica                      | Titanica                      | Low, Stephen           | Stephen Low           | tt0105601 |
| 1746508376 | 1927 | 1927 | The Last Trail                | The Last Trail                | Seiler, Lewis          | Lewis Seiler          | tt0018081 |
| 1746500089 | 1924 | 1924 | So This Is Marriage           | So This Is Marriage?          | Henley, Hobart         | Hobart Henley         | tt0015348 |
| 1746555477 | 1955 | 1955 | Murder Is My Beat             | Murder Is My Beat             | Ulmer, Edgar G.        | Edgar G. Ulmer        | tt0048396 |
| 1746578471 | 1963 | 1962 | Young Guns of Texas           | Young Guns of Texas           | Dexter, Maury          | Maury Dexter          | tt0056710 |
| 1745341741 | 2003 | 2003 | The Core                      | The Core                      | Amiel, Jon             | Jon Amiel             | tt0298814 |
| 1746570075 | 1952 | 1952 | Fort Osage                    | Fort Osage                    | Selander, Lesley       | Lesley Selander       | tt0044630 |
| 1746504628 | 1917 | 1918 | Cannibals and Carnivals       | Cannibals and Carnivals       | Moore, Vin             | Vin Moore             | tt0328928 |
| 1746533045 | 1914 | 1914 | The Lust of the Red Man       | The Lust of the Red Man       | Hamilton, Gilbert P.   | Gilbert P. Hamilton   | tt0004276 |
| 1746393554 | 1986 | 1985 | The Man Who Envied Women      | The Man Who Envied Women      | Rainer, Yvonne         | Yvonne Rainer         | tt0131467 |
| 1745358590 | 2008 | 2008 | We Are Wizards                | We Are Wizards                | Koury, Josh            | Josh Koury            | tt1183705 |
| 1745358041 | 2008 | 2008 | The Cool School               | The Cool School               | Neville, Morgan        | Morgan Neville        | tt1031225 |
| 1745293784 | 2007 | 2007 | Year of the Dog               | Year of the Dog               | White, Mike            | Kevin Lau             | tt1035516 |
| 1745302519 | 2005 | 2004 | Girl Play                     | Girl Play                     | Friedlander, Lee       | Lee Friedlander       | tt0416773 |
| 1745342653 | 2002 | 2001 | Plan B                        | Plan B                        | Yaitanes, Greg         |                       | tt0391402 |
| 1746578474 | 1950 | 1950 | Under Mexicali Stars          | Under Mexicali Stars          | Blair, George          | George Blair          | tt0043085 |
| 1746577286 | 1950 | 1949 | Sons of New Mexico            | Sons of New Mexico            | English, John          | John English          | tt0041901 |
| 1746500362 | 1949 | 1950 | The Kid from Gower Gulch      | The Kid from Gower Gulch      | Drake, Oliver          | Oliver Drake          | tt0041544 |
| 1746508280 | 1949 | 1949 | Rusty's Birthday              | Rusty's Birthday              | Friedman, Seymour      | Seymour Friedman      | tt0041834 |
| 1746530666 | 1949 | 1949 | Navajo Trail Raiders          | Navajo Trail Raiders          | Springsteen, R. G.     | R.G. Springsteen      | tt0041685 |
| 1746474959 | 1948 | 1948 | Outlaw Brand                  | Outlaw Brand                  | Hillyer, Lambert       | Lambert Hillyer       | tt0040677 |
| 1746508459 | 1948 | 1948 | Silver Trails                 | Silver Trails                 | Cabanne, Christy       | Christy Cabanne       | tt0040790 |
| 1746438325 | 1945 | 1945 | Fighting Bill Carson          | Fighting Bill Carson          | Newfield, Sam          | Sam Newfield          | tt0037697 |
| 1746454249 | 1945 | 1945 | A Game of Death               | A Game of Death               | Wise, Robert           | Robert Wise           | tt0038549 |
| 1746454398 | 1943 | 1943 | Tornado                       | Tornado                       | Berke, William         | William Berke         | tt0036451 |
| 1746438219 | 1943 | 1943 | Revenge of the Zombies        | Revenge of the Zombies        | Sekely, Steve          | Steve Sekely          | tt0036307 |
| 1746583793 | 1929 | 1929 | Jazz Heaven                   | Jazz Heaven                   | Brown, Melville        | Melville W. Brown     | tt0020042 |
| 1746584846 | 1929 | 1929 | The Laughing Lady             | The Laughing Lady             | Schertzinger, Victor   | Victor Schertzinger   | tt0020082 |
| 1746514086 | 1927 | 1927 | I'll Be There                 | I'll Be There                 | Yaconelli, Frank       | Frank Yaconelli       | tt0361731 |
| 1746508467 | 1926 | 1926 | Sheriff's Girl                | Sheriff's Girl                | Wilson, Ben            | Ben F. Wilson         | tt0339662 |
| 1746507793 | 1924 | 1924 | Horse Shoe Luck               | Horseshoe Luck                | Franz, Joseph          | Joseph Franz          | tt0356703 |
| 1746585430 | 1940 | 1940 | Dr. Cyclops                   | Dr. Cyclops                   | Schoedsack, Ernest B.  | Ernest B. Schoedsack  | tt0032412 |
| 1746580612 | 1937 | 1936 | Death in the Air              | Death in the Air              | Clifton, Elmer         | Elmer Clifton         | tt0028776 |
| 1746577223 | 1962 | 1962 | Hand of Death                 | Hand of Death                 | Nelson, Gene           | Gene Nelson           | tt0056055 |
| 1746569739 | 1957 | 1957 | Voodoo Island                 | Voodoo Island                 | LeBorg, Reginald       | Reginald Le Borg      | tt0051173 |
| 1746566297 | 1955 | 1955 | Five Guns West                | Five Guns West                | Corman, Roger          | Roger Corman          | tt0048078 |
| 1746563856 | 1952 | 1952 | The Gunman                    | The Gunman                    | Collins, Lewis         | Lewis D. Collins      | tt0044678 |
| 1746571069 | 1952 | 1952 | South Pacific Trail           | South Pacific Trail           | Witney, William        | William Witney        | tt0045182 |
| 1769971164 | 1969 | 1969 | Snow Job                      | Snow Job                      | Shiffen, Arlo          | Don Walters           | tt3621648 |
| 1746208189 | 1969 | 1969 | Charles Lloyd--Journey Within | Charles Lloyd: Journey Within | Sherman, Eric          | Eric Sherman          | tt0190297 |
| 1769970590 | 1968 | 1968 | Diary of Knockers McCalla     | The Diary of Knockers McCalla |                        | Barry Mahon           | tt0216702 |
| 1769970568 | 1968 | 1968 | An Angle of Love              | An Angle of Love              | Hennigar, William K.   | William K. Hennigar   | tt0210509 |
| 1746186273 | 1967 | 1966 | Skin Deep in Love             | Skin Deep in Love             | Sarno, Joe             | Joseph W. Sarno       | tt0060649 |
| 1769970410 | 1964 | 1964 | Sextet                        | Sextet                        |                        | Bud Irwin             | tt0445705 |
| 1746410707 | 1993 | 1993 | Family Prayers                | Family Prayers                | Rosenfelt, Scott       | Scott M. Rosenfelt    | tt0106860 |
| 1746577570 | 1933 | 1933 | The Warrior's Husband         | The Warrior's Husband         | Lang, Walter           | Walter Lang           | tt0024753 |
| 1746575901 | 1932 | 1932 | The Spirit of the West        | Spirit of the West            | Brower, Otto           | Otto Brower           | tt0023502 |
| 1746493453 | 1910 | 1910 | A Texas Joke                  | A Texas Joke                  |                        | Gaston Méliès         | tt0822866 |
| 1746563019 | 1952 | 1952 | African Treasure              | African Treasure              | Beebe, Ford            | Ford Beebe            | tt0044332 |
| 1746508931 | 1925 | 1925 | Renegade Holmes, M. D.        | Renegade Holmes, M.D.         | Wilson, Ben            | Ben F. Wilson         | tt0156016 |
| 1746574567 | 1935 | 1935 | Get That Man                  | Get That Man                  | Bennet, Spencer Gordon | Spencer Gordon Bennet | tt0026405 |
| 1746211224 | 1972 | 1972 | Heat                          | Heat                          | Morrissey, Paul        | Paul Morrissey        | tt0068688 |
| 1746512375 | 1915 | 1915 | Mary's Lamb                   | Mary's Lamb                   | MacKenzie, Donald      | Donald MacKenzie      | tt0005721 |
| 1746581877 | 1928 | 1928 | Battling Bookworm             | The Battling Bookworm         |                        |                       | tt0315812 |
| 1746513234 | 1923 | 1923 | When Law Comes to Hades       | When Law Comes to Hades       |                        |                       | tt0014597 |

|            |      |      |                                 |                                 |                                  |                                     |           |
|------------|------|------|---------------------------------|---------------------------------|----------------------------------|-------------------------------------|-----------|
| 1746582160 | 1929 | 1929 | His Glorious Night              | His Glorious Night              | Barrymore, Lionel                | Lionel Barrymore                    | tt0019988 |
| 1746410148 | 1989 | 1988 | Fright Night: Part 2            | Fright Night Part 2             | Wallace, Tommy Lee               | Tommy Lee Wallace                   | tt0097390 |
| 1746520480 | 1927 | 1927 | The Unknown                     | The Unknown                     | Browning, Tod                    | Tod Browning                        | tt0018528 |
| 1746235887 | 1975 | 1974 | Dark Star                       | Dark Star                       | Carpenter, John                  | John Carpenter                      | tt0069945 |
| 1746394376 | 1984 | 1984 | Stop Making Sense               | Stop Making Sense               | Demme, Jonathan                  | Jonathan Demme                      | tt0088178 |
| 1746583991 | 1935 | 1935 | The Last Days of Pompeii        | The Last Days of Pompeii        | Schoedsack, Ernest B.            | Ernest B. Schoedsack                | tt0026605 |
| 1746583114 | 1935 | 1935 | Captain Hurricane               | Captain Hurricane               | Robertson, John                  | John S. Robertson                   | tt0026176 |
| 1746562399 | 1956 | 1955 | The Phantom from 10,000 Leagues | The Phantom from 10,000 Leagues | Milner, Dan                      | Dan Milner                          | tt0049615 |
| 1746576731 | 1931 | 1931 | Subway Express                  | Subway Express                  | Newmeyer, Fred                   | Fred C. Newmeyer                    | tt0022446 |
| 1746573747 | 1958 | 1958 | In Love and War                 | In Love and War                 | Dunne, Philip                    | Philip Dunne                        | tt0051770 |
| 1746235217 | 1977 | 1977 | The Turning Point               | The Turning Point               | Ross, Herbert                    | Herbert Ross                        | tt0076843 |
| 1746434930 | 1998 | 1998 | Monument Ave.                   | Monument Ave.                   | Demme, Ted                       | Ted Demme                           | tt0119802 |
| 1746453479 | 1942 | 1942 | Wings for the Eagle             | Wings for the Eagle             | Bacon, Lloyd                     | Lloyd Bacon                         | tt0035564 |
| 1746554364 | 1964 | 1964 | Dark Purpose                    | Dark Purpose                    | Marshall, George                 | George Marshall                     | tt0058234 |
| 1746502040 | 1916 | 1916 | The Blacklist                   | The Blacklist                   | Mille, William C. de             | William C. de Mille                 | tt0006437 |
| 1746569809 | 1958 | 1958 | The Brain Eaters                | The Brain Eaters                | VeSota, Bruno                    | Bruno VeSota                        | tt0051432 |
| 1746483448 | 1918 | 1918 | Flower of the Dusk              | Flower of the Dusk              | Collins, John H.                 | John H. Collins                     | tt0009080 |
| 1746570345 | 1934 | 1934 | Kentucky Kernels                | Kentucky Kernels                | Stevens, George                  | George Stevens                      | tt0025345 |
| 1746465148 | 1946 | 1946 | Moon Over Montana               | Moon Over Montana               | Drake, Oliver                    | Oliver Drake                        | tt0038749 |
| 1746514050 | 1913 | 1913 | The Count of Monte Cristo       | The Count of Monte Cristo       | Porter, Edwin S.; Golden, Joseph | Joseph A. Golden                    | tt0002767 |
| 1746574304 | 1950 | 1950 | When Willie Comes Marching Home | When Willie Comes Marching Home | Ford, John                       | John Ford                           | tt0043129 |
| 1746474841 | 1945 | 1945 | Wonder Man                      | Wonder Man                      | Humberstone, Bruce               | H. Bruce Humberstone                | tt0038260 |
| 1746507893 | 1950 | 1950 | Crooked River                   | Crooked River                   | Carr, Thomas                     | Thomas Carr                         | tt0042356 |
| 1746574651 | 1935 | 1935 | Alias John Law                  | Alias John Law                  | Bradbury, Robert N.              | Robert N. Bradbury                  | tt0026052 |
| 1746584531 | 1929 | 1929 | Riders of the Rio Grande        | Riders of the Rio Grande        | McGowan, J. P.                   | J.P. McGowan                        | tt0020329 |
| 1746513613 | 1927 | 1927 | Ain't Love Funny?               | Ain't Love Funny?               | Andrews, Del                     | Del Andrews                         | tt0017595 |
| 1745358510 | 2002 | 2002 | Insomnia                        | Insomnia                        | Nolan, Christopher               | Christopher Nolan                   | tt0278504 |
| 1746503802 | 1919 | 1919 | The Follies Girl                | The Follies Girl                | Dillon, Jack                     | John Francis Dillon                 | tt0010133 |
| 1746577946 | 1938 | 1938 | The Lone Wolf in Paris          | The Lone Wolf in Paris          | Rogell, Albert S.                | Albert S. Rogell                    | tt0030383 |
| 1746504208 | 1918 | 1918 | Broken Ties                     | Broken Ties                     | Ashley, Arthur                   | Arthur Ashley                       | tt0184307 |
| 1746515013 | 1923 | 1923 | The Red Warning                 | The Red Warning                 | Bradbury, Robert North           | Robert N. Bradbury                  | tt0014400 |
| 1746566263 | 1953 | 1953 | Private Eyes                    | Private Eyes                    | Bernds, Edward                   | Edward Berndts                      | tt0046210 |
| 1746465022 | 1942 | 1942 | Bowery at Midnight              | Bowery at Midnight              | Fox, Wallace                     | Wallace Fox                         | tt0034546 |
| 1746580832 | 1939 | 1939 | The Magnificent Fraud           | The Magnificent Fraud           | Florey, Robert                   | Robert Florey                       | tt0031604 |
| 1745293593 | 2005 | 2005 | Shopgirl                        | Shopgirl                        | Tucker, Anand                    | Anand Tucker                        | tt0338427 |
| 1746520975 | 1949 | 1949 | Special Agent                   | Special Agent                   | Thomas, William C.               | William C. Thomas                   | tt0041910 |
| 1746501468 | 1915 | 1915 | The White Pearl                 | The White Pearl                 | Porter, Edwin S.; Ford, Hugh     | Hugh Ford                           | tt0006279 |
| 1746513164 | 1910 | 1910 | The Pony Express Rider          | The Pony Express Rider          |                                  | Gilbert M. 'Broncho Billy' Anderson | tt0001365 |
| 1746549835 | 1955 | 1955 | The Cobweb                      | The Cobweb                      | Minnelli, Vincente               | Vincente Minnelli                   | tt0047944 |
| 1746454614 | 1941 | 1941 | Man from Montana                | Man from Montana                | Taylor, Ray                      | Ray Taylor                          | tt0033872 |
| 1746580743 | 1935 | 1935 | McFadden's Flats                | McFadden's Flats                | Murphy, Ralph                    | Ralph Murphy                        | tt0026693 |
| 1746436368 | 1943 | 1943 | The Powers Girl                 | The Powers Girl                 | McLeod, Norman                   | Norman Z. McLeod                    | tt0035206 |
| 1746580833 | 1936 | 1936 | Robin Hood of El Dorado         | Robin Hood of El Dorado         | Wellman, William A.              | William A. Wellman                  | tt0028197 |
| 1746520423 | 1950 | 1950 | No Way Out                      | No Way Out                      | Mankiewicz, Joseph L.            | Joseph L. Mankiewicz                | tt0042792 |
| 1746502217 | 1915 | 1915 | What Happened to Father         | What Happened to Father         | Williams, C. Jay                 | C.J. Williams                       | tt0006252 |
| 1746577787 | 1935 | 1935 | Trail's End                     | Trails End                      | Herman, Al                       | Albert Herman                       | tt0027129 |
| 1746584463 | 1931 | 1931 | Night Life in Reno              | Night Life in Reno              | Cannon, Raymond                  | Raymond Cannon                      | tt0151751 |
| 1746504391 | 1920 | 1920 | The Gilded Dream                | The Gilded Dream                | Sturgeon, Rollin                 | Rollin S. Sturgeon                  | tt0011225 |
| 1746566020 | 1955 | 1954 | So This Is Paris                | So This Is Paris                | Quine, Richard                   | Richard Quine                       | tt0047508 |
| 1746582338 | 1928 | 1928 | The Border Patrol               | The Border Patrol               | Hogan, James P.                  | James P. Hogan                      | tt0018715 |
| 1746508028 | 1949 | 1949 | Roughshod                       | Roughshod                       | Robson, Mark                     | Mark Robson                         | tt0041827 |
| 1746500100 | 1946 | 1946 | Dark Alibi                      | Dark Alibi                      | Karlson, Phil                    | Phil Karlson                        | tt0038452 |
| 1746186243 | 1967 | 1967 | Clambake                        | Clambake                        | Nadel, Arthur H.                 | Arthur H. Nadel                     | tt0061489 |
| 1746500641 | 1950 | 1950 | Experiment Alcatraz             | Experiment Alcatraz             | Cahn, Edward L.                  | Edward L. Cahn                      | tt0042442 |
| 1746491983 | 1948 | 1948 | I Surrender Dear                | I Surrender Dear                | Dreifuss, Arthur                 | Arthur Dreifuss                     | tt0178610 |
| 1746474416 | 1948 | 1948 | Pitfall                         | Pitfall                         | DeToth, Andre                    | André De Toth                       | tt0040695 |
| 1746199841 | 1967 | 1967 | Hour of the Gun                 | Hour of the Gun                 | Sturges, John                    | John Sturges                        | tt0061787 |

|            |      |      |                                   |                                   |                                      |                    |           |
|------------|------|------|-----------------------------------|-----------------------------------|--------------------------------------|--------------------|-----------|
| 1746583511 | 1931 | 1931 | The Lady from Nowhere             | The Lady from Nowhere             | Thorpe, Richard                      | Richard Thorpe     | tt0022044 |
| 1746421063 | 1986 | 1986 | Wise Guys                         | Wise Guys                         | De Palma, Brian                      | Brian De Palma     | tt0092226 |
| 1746523325 | 1915 | 1915 | To Cherish and Protect            | To Cherish and Protect            | Humphrey, William                    | William Humphrey   | tt0006164 |
| 1746496818 | 1918 | 1918 | All Night                         | All Night                         | Powell, Paul                         | Paul Powell        | tt0008822 |
| 1746574832 | 1933 | 1933 | Trailing North                    | Trailing North                    | McCarthy, John P.                    | John P. McCarthy   | tt0024690 |
| 1746559842 | 1964 | 1964 | The Thin Red Line                 | The Thin Red Line                 | Marton, Andrew                       | Andrew Marton      | tt0058648 |
| 1746495616 | 1919 | 1919 | The Other Man's Wife              | The Other Man's Wife              | Harbaugh, Carl                       | Carl Harbaugh      | tt0010535 |
| 1746503640 | 1919 | 1919 | The Busher                        | The Busher                        | Storm, Jerome                        | Jerome Storm       | tt0009976 |
| 1746561405 | 1932 | 1932 | The Racing Strain                 | The Racing Strain                 | Storm, Jerome                        | Jerome Storm       | tt0023366 |
| 1746507876 | 1925 | 1925 | Big Pal                           | Big Pal                           | Adolfi, John G.                      | John G. Adolfi     | tt0015623 |
| 1746564945 | 1952 | 1952 | The Devil Makes Three             | The Devil Makes Three             | Marton, Andrew                       | Andrew Marton      | tt0044547 |
| 1746438151 | 1943 | 1943 | Hitler's Children                 | Hitler's Children                 | Dmytryk, Edward; Reis, Irving        | Edward Dmytryk     | tt0034856 |
| 1769969997 | 1911 | 1911 | Over the Hills                    | Over the Hills                    | Smiley, Joseph W.; Tucker, George L. | Joseph W. Smiley   | tt0001824 |
| 1746583023 | 1935 | 1935 | Seven Keys to Baldpate            | Seven Keys to Baldpate            | Hamilton, William; Killy, Edward     | William Hamilton   | tt0026978 |
| 1746584739 | 1929 | 1929 | The Argyle Case                   | The Argyle Case                   | Bretherton, Howard                   | Howard Bretherton  | tt0019647 |
| 1746409332 | 1990 | 1990 | Cadillac Man                      | Cadillac Man                      | Donaldson, Roger                     | Roger Donaldson    | tt0099204 |
| 1746584363 | 1939 | 1939 | Legion of Lost Flyers             | Legion of Lost Flyers             | Cabanne, Christy                     | Christy Cabanne    | tt0031562 |
| 1746583107 | 1937 | 1937 | High Flyers                       | High Flyers                       | Cline, Edward                        | Edward F. Cline    | tt0028998 |
| 1746199549 | 1967 | 1967 | My Body Hungers                   | My Body Hungers                   | Sarno, Joe                           | Joseph W. Sarno    | tt0057240 |
| 1746235037 | 1979 | 1979 | Dracula                           | Dracula                           | Badham, John                         | John Badham        | tt0079073 |
| 1746186086 | 1965 | 1965 | Love and Kisses                   | Love and Kisses                   | Nelson, Ozzie                        | Ozzie Nelson       | tt0059408 |
| 1746569684 | 1958 | 1958 | The Geisha Boy                    | The Geisha Boy                    | Tashlin, Frank                       | Frank Tashlin      | tt0051649 |
| 1746475540 | 1944 | 1944 | The Pearl of Death                | The Pearl of Death                | Neill, Roy William                   | Roy William Neill  | tt0037168 |
| 1746513814 | 1916 | 1916 | My Country First                  | My Country First                  | Terriss, Tom                         | Tom Terriss        | tt0007103 |
| 1745271907 | 2000 | 2000 | What Planet Are You From?         | What Planet Are You From?         | Nichols, Mike                        | Mike Nichols       | tt0181151 |
| 1746570233 | 1933 | 1933 | The Important Witness             | The Important Witness             | Newfield, Sam                        | Sam Newfield       | tt0024174 |
| 1746435109 | 1943 | 1943 | The Chance of a Lifetime          | The Chance of a Lifetime          | Castle, William                      | William Castle     | tt0035726 |
| 1746497453 | 1918 | 1918 | Midnight Madness                  | Midnight Madness                  | Julian, Rupert                       | Rupert Julian      | tt0009371 |
| 1746584881 | 1940 | 1940 | George Washington Carver          | George Washington Carver          | Parker, Ben                          | Ben Parker         | tt0032517 |
| 1746569692 | 1954 | 1954 | The Long Wait                     | The Long Wait                     | Saville, Victor                      | Victor Saville     | tt0047190 |
| 1746421266 | 1996 | 1996 | Bottle Rocket                     | Bottle Rocket                     | Anderson, Wes                        | Wes Anderson       | tt0115734 |
| 1746582828 | 1938 | 1938 | Thunder in the Desert             | Thunder in the Desert             | Newfield, Sam                        | Sam Newfield       | tt0030870 |
| 1746585441 | 1939 | 1939 | Feud of the Range                 | Feud of the Range                 | Webb, Harry S.                       | Harry S. Webb      | tt0031301 |
| 1746492239 | 1946 | 1946 | I Ring Doorbells                  | I Ring Doorbells                  | Strayer, Frank                       | Frank R. Strayer   | tt0038627 |
| 1746467515 | 1917 | 1917 | Life's Whirlpool                  | Life's Whirlpool                  | Barrymore, Lionel                    | Lionel Barrymore   | tt0008183 |
| 1746584231 | 1939 | 1939 | The Girl from Mexico              | The Girl from Mexico              | Goodwins, Leslie                     | Leslie Goodwins    | tt0031370 |
| 1769971120 | 1969 | 1969 | Joys of Georgette                 | Joys of Georgette                 |                                      |                    | tt0222074 |
| 1745271900 | 2000 | 2000 | X-Men                             | X Men                             | Singer, Bryan                        | Bryan Singer       | tt0120903 |
| 1746553435 | 1965 | 1965 | My Blood Runs Cold                | My Blood Runs Cold                | Conrad, William                      | William Conrad     | tt0059487 |
| 1746465292 | 1943 | 1943 | Thumbs Up                         | Thumbs Up                         | Santley, Joseph                      | Joseph Santley     | tt0036436 |
| 1746233383 | 1968 | 1968 | Speedway                          | Speedway                          | Taurog, Norman                       | Norman Taurog      | tt0063634 |
| 1746492062 | 1948 | 1948 | That Lady in Ermine               | That Lady in Ermine               | Lubitsch, Ernst                      | Ernst Lubitsch     | tt0040869 |
| 1746583596 | 1930 | 1930 | In the Next Room                  | In the Next Room                  | Cline, Edward                        | Edward F. Cline    | tt0020998 |
| 1746491780 | 1945 | 1945 | The Valley of Decision            | The Valley of Decision            | Garnett, Tay                         | Tay Garnett        | tt0038213 |
| 1746523069 | 1913 | 1913 | A Sister to Carmen                | A Sister to Carmen                | Gaskill, Charles L.                  | Charles L. Gaskill | tt0003378 |
| 1746420156 | 1990 | 1989 | The Unbelievable Truth            | The Unbelievable Truth            |                                      | Hal Hartley        | tt0100842 |
| 1769969981 | 1912 | 1912 | The Flirting Husband              | The Flirting Husband              | Sennett, Mack                        | Mack Sennett       | tt0002184 |
| 1746235657 | 1973 | 1973 | Battle for the Planet of the Apes | Battle for the Planet of the Apes | Thompson, J. Lee                     | J. Lee Thompson    | tt0069768 |
| 1746578486 | 1959 | 1958 | Some Came Running                 | Some Came Running                 | Minnelli, Vincente                   | Vincente Minnelli  | tt0052218 |
| 1746584370 | 1940 | 1940 | The Westerner                     | The Westerner                     | Wyler, William                       | William Wyler      | tt0033253 |
| 1746554933 | 1965 | 1965 | The Monkey's Uncle                | The Monkey's Uncle                | Stevenson, Robert                    | Robert Stevenson   | tt0059462 |
| 1746573650 | 1931 | 1931 | Lover Come Back                   | Lover Come Back                   | Kenton, Erle C.                      | Erle C. Kenton     | tt0022094 |
| 1746578939 | 1960 | 1959 | Cuban Rebel Girls                 | Cuban Rebel Girls                 | Mahon, Barry                         | Barry Mahon        | tt0052717 |
| 1746497008 | 1918 | 1918 | Brace Up                          | Brace Up                          | Clifton, Elmer                       | Elmer Clifton      | tt0008917 |
| 1746533182 | 1928 | 1928 | The Little Snob                   | The Little Snob                   | Adolfi, John G.                      | John G. Adolfi     | tt0019105 |
| 1746569968 | 1958 | 1958 | Crash Landing                     | Crash Landing                     | Sears, Fred F.                       | Fred F. Sears      | tt0051497 |
| 1746579053 | 1951 | 1951 | The Man from Planet X             | The Man from Planet X             | Ulmer, Edgar G.                      | Edgar G. Ulmer     | tt0043778 |

|            |      |      |                               |                               |                      |                     |           |
|------------|------|------|-------------------------------|-------------------------------|----------------------|---------------------|-----------|
| 1746583125 | 1936 | 1936 | Trapped by Television         | Trapped by Television         | Lord, Del            | Del Lord            | tt0028405 |
| 1746512144 | 1916 | 1916 | The Making of Maddalena       | The Making of Maddalena       | Lloyd, Frank         | Frank Lloyd         | tt0007011 |
| 1746570208 | 1934 | 1934 | Paris Interlude               | Paris Interlude               | Marin, Edwin L.      | Edwin L. Marin      | tt0025629 |
| 1746464791 | 1941 | 1940 | Victory                       | Victory                       | Cromwell, John       | John Cromwell       | tt0033220 |
| 1746524547 | 1916 | 1916 | Little Meena's Romance        | Little Meena's Romance        | Powell, Paul         | Paul Powell         | tt0006933 |
| 1746584700 | 1930 | 1930 | The Bad One                   | The Bad One                   | Fitzmaurice, George  | George Fitzmaurice  | tt0020663 |
| 1746566192 | 1956 | 1956 | The Harder They Fall          | The Harder They Fall          | Robson, Mark         | Mark Robson         | tt0049291 |
| 1746198722 | 1965 | 1965 | The Loved One                 | The Loved One                 | Richardson, Tony     | Tony Richardson     | tt0059410 |
| 1746492434 | 1947 | 1947 | Two Blondes and a Redhead     | Two Blondes and a Redhead     | Dreifuss, Arthur     | Arthur Dreifuss     | tt0178956 |
| 1746574945 | 1935 | 1935 | Bonnie Scotland               | Bonnie Scotland               | Horne, James W.      | James W. Horne      | tt0026126 |
| 1746504611 | 1918 | 1918 | Beyond the Law                | Beyond the Law                | Marston, Theodore    | Theodore Marston    | tt0182787 |
| 1746433969 | 1997 | 1997 | George of the Jungle          | George of the Jungle          | Weisman, Sam         | Sam Weisman         | tt0119190 |
| 1746464957 | 1945 | 1945 | Pursuit to Algiers            | Pursuit to Algiers            | Neill, Roy William   | Roy William Neill   | tt0038008 |
| 1746501025 | 1922 | 1922 | His Wife's Husband            | His Wife's Husband            | Webb, Kenneth        | Kenneth S. Webb     | tt0013240 |
| 1746185157 | 1965 | 1965 | Joy in the Morning            | Joy in the Morning            | Segal, Alex          | Alex Segal          | tt0059339 |
| 1746418886 | 1940 | 1940 | Susan and God                 | Susan and God                 | Cukor, George        | George Cukor        | tt0033117 |
| 1746571570 | 1931 | 1931 | Woman Hungry                  | Woman Hungry                  | Badger, Clarence     | Clarence G. Badger  | tt0021728 |
| 1746570451 | 1934 | 1934 | One Night of Love             | One Night of Love             | Schertzinger, Victor | Victor Schertzinger | tt0025601 |
| 1746584258 | 1936 | 1936 | Sing, Baby, Sing              | Sing, Baby, Sing              | Lanfield, Sidney     | Sidney Lanfield     | tt0028255 |
| 1746502937 | 1923 | 1923 | Woman-Proof                   | Woman Proof                   | Green, Alfred E.     | Alfred E. Green     | tt0014625 |
| 1746550126 | 1955 | 1955 | The Looters                   | The Looters                   | Biberman, Abner      | Abner Biberman      | tt0048313 |
| 1746580646 | 1936 | 1936 | Down to the Sea               | Down to the Sea               | Collins, Lewis D.    | Lewis D. Collins    | tt0027544 |
| 1746500035 | 1948 | 1948 | Romance on the High Seas      | Romance on the High Seas      | Curtiz, Michael      | Michael Curtiz      | tt0040745 |
| 1746421556 | 1992 | 1992 | A League of Their Own         | A League of Their Own         | Marshall, Penny      | Penny Marshall      | tt0104694 |
| 1746515361 | 1920 | 1920 | Through Eyes of Men           | Through Eyes of Men           | Taylor, Charles A.   | Charles A. Taylor   | tt0011770 |
| 1745342912 | 2001 | 2001 | Sweet November                | Sweet November                | O'Connor, Pat        | Pat O'Connor        | tt0230838 |
| 1746498295 | 1917 | 1917 | When Love Was Blind           | When Love Was Blind           | Sullivan, Frederick  | Frederick Sullivan  | tt0184011 |
| 1746508078 | 1925 | 1925 | The Call of Courage           | The Call of Courage           | Smith, Clifford S.   | Clifford Smith      | tt0015664 |
| 1746585280 | 1930 | 1930 | The Utah Kid                  | The Utah Kid                  | Thorpe, Richard      | Richard Thorpe      | tt0021509 |
| 1746514429 | 1916 | 1916 | Civilization's Child          | Civilization's Child          | Giblyn, Charles      | Charles Giblyn      | tt0157470 |
| 1745342694 | 2004 | 2004 | Ladder 49                     | Ladder 49                     | Russell, Jay         | Jay Russell         | tt0349710 |
| 1746423037 | 1995 | 1995 | The Doom Generation           | The Doom Generation           | Araki, Gregg         | Gregg Araki         | tt0112887 |
| 1746394249 | 1987 | 1987 | Ishtar                        | Ishtar                        | May, Elaine          | Elaine May          | tt0093278 |
| 1746420106 | 1987 | 1987 | Predator                      | Predator                      | McTiernan, John      | John McTiernan      | tt0093773 |
| 1746475651 | 1948 | 1947 | The Lady from Shanghai        | The Lady from Shanghai        | Welles, Orson        | Orson Welles        | tt0040525 |
| 1746577551 | 1934 | 1934 | The Thin Man                  | The Thin Man                  | Van Dyke, W. S.      | W.S. Van Dyke       | tt0025878 |
| 1746520483 | 1927 | 1926 | The Little Firebrand          | The Little Firebrand          | Hutchison, Charles   | Charles Hutchison   | tt0127662 |
| 1746553653 | 1964 | 1964 | Cheyenne Autumn               | Cheyenne Autumn               | Ford, John           | John Ford           | tt0057940 |
| 1746524013 | 1910 | 1910 | A Self-Made Hero              | A Self Made Hero              |                      | Harry Solter        | tt0201076 |
| 1746578878 | 1951 | 1951 | Mr. Belvedere Rings the Bell  | Mr. Belvedere Rings the Bell  | Koster, Henry        | Henry Koster        | tt0043820 |
| 1746408661 | 1988 | 1988 | Young Guns                    | Young Guns                    | Cain, Christopher    | Christopher Cain    | tt0096487 |
| 1746438970 | 1942 | 1942 | There's One Born Every Minute | There's One Born Every Minute | Young, Harold        | Harold Young        | tt0035427 |
| 1746574017 | 1961 | 1961 | Shangri-La                    | Shangri La                    |                      |                     | tt0148786 |
| 1746559912 | 1965 | 1965 | Shenandoah                    | Shenandoah                    | McLaglen, Andrew V.  | Andrew V. McLaglen  | tt0059711 |
| 1746555742 | 1957 | 1957 | Island in the Sun             | Island in the Sun             | Rossen, Robert       | Robert Rossen       | tt0050549 |
| 1746574730 | 1934 | 1934 | Here Is My Heart              | Here Is My Heart              | Tuttle, Frank        | Frank Tuttle        | tt0025239 |
| 1746582849 | 1937 | 1937 | Girl Overboard                | Girl Overboard                | Salkow, Sidney       | Sidney Salkow       | tt0027674 |
| 1746563972 | 1953 | 1952 | Ride the Man Down             | Ride the Man Down             | Kane, Joseph         | Joseph Kane         | tt0045086 |
| 1746585494 | 1939 | 1939 | Texas Stampede                | Texas Stampede                | Nelson, Sam          | Sam Nelson          | tt0032013 |
| 1746218147 | 1966 | 1966 | The Hot Pearl Snatch          | The Hot Pearl Snatch          |                      | Ron Mart            | tt0060517 |
| 1746569568 | 1954 | 1954 | Johnny Guitar                 | Johnny Guitar                 | Ray, Nicholas        | Nicholas Ray        | tt0047136 |
| 1746501841 | 1922 | 1922 | Broadway Rose                 | Broadway Rose                 | Leonard, Robert Z.   | Robert Z. Leonard   | tt0012979 |
| 1769970062 | 1912 | 1912 | The Redemption of "Greek Joe" | The Redemption of 'Greek Joe' |                      | William V. Mong     | tt0002456 |
| 1746513849 | 1927 | 1927 | The College Widow             | The College Widow             | Mayo, Archie L.      | Archie Mayo         | tt0017767 |
| 1745342702 | 2008 | 2008 | Milk                          | Milk                          | Van Sant, Gus        | Gus Van Sant        | tt1013753 |
| 1746475512 | 1947 | 1947 | They Won't Believe Me         | They Won't Believe Me         | Pichel, Irving       | Irving Pichel       | tt0039896 |
| 1746435165 | 1940 | 1940 | Little Orvie                  | Little Orvie                  | McCarey, Ray         | Ray McCarey         | tt0032720 |



|            |      |      |                                       |                                       |                                     |                      |           |
|------------|------|------|---------------------------------------|---------------------------------------|-------------------------------------|----------------------|-----------|
| 1745293709 | 2005 | 2005 | In the Mix                            | In the Mix                            | Underwood, Ron                      | Ron Underwood        | tt0426615 |
| 1746570590 | 1934 | 1934 | Terror of the Plains                  | Terror of the Plains                  | Webb, Harry S.                      | Harry S. Webb        | tt0027084 |
| 1746184812 | 1965 | 1965 | Nude Scrapbook                        | Nude Scrapbook                        | Mahon, Barry                        | Barry Mahon          | tt0145136 |
| 1746496106 | 1921 | 1921 | They Shall Pay                        | They Shall Pay                        | Justine, Martin                     | Martin Justice       | tt0169316 |
| 1746439133 | 1941 | 1941 | Miss Polly                            | Miss Polly                            | Guiol, Fred                         | Fred Guiol           | tt0033912 |
| 1746585282 | 1929 | 1929 | The Last Warning                      | The Last Warning                      | Leni, Paul                          | Paul Leni            | tt0020080 |
| 1746565948 | 1956 | 1956 | Santiago                              | Santiago                              | Douglas, Gordon                     | Gordon Douglas       | tt0049714 |
| 1746454387 | 1940 | 1940 | Cherokee Strip                        | Cherokee Strip                        | Selander, Lesley                    | Lesley Selander      | tt0032330 |
| 1746235053 | 1975 | 1975 | Escape to Witch Mountain              | Escape to Witch Mountain              | Hough, John                         | John Hough           | tt0072951 |
| 1746574385 | 1961 | 1961 | Most Dangerous Man Alive              | Most Dangerous Man Alive              | Dwan, Allan                         | Allan Dwan           | tt0055197 |
| 1746436043 | 1941 | 1941 | Robin Hood of the Pecos               | Robin Hood of the Pecos               | Kane, Joseph                        | Joseph Kane          | tt0034120 |
| 1746456072 | 1997 | 1997 | Turbulence                            | Turbulence                            | Butler, Robert                      | Robert Butler        | tt0120390 |
| 1746567751 | 1933 | 1933 | I Cover the Waterfront                | I Cover the Waterfront                | Cruze, James                        | James Cruze          | tt0024151 |
| 1746422290 | 1993 | 1993 | Philadelphia                          | Philadelphia                          | Demme, Jonathan                     | Jonathan Demme       | tt0107818 |
| 1746500567 | 1925 | 1925 | Hurricane Horseman                    | The Hurricane Horseman                | Eddy, Robert                        | Robert Eddy          | tt0015933 |
| 1746570877 | 1952 | 1952 | Harem Girl                            | Harem Girl                            | Bernds, Edward                      | Edward Bernds        | tt0044689 |
| 1746496276 | 1917 | 1917 | The Submarine Eye                     | The Submarine Eye                     | Kelley, Winthrop                    | Winthrop Kelley      | tt0008638 |
| 1746464809 | 1941 | 1941 | Death Valley Outlaws                  | Death Valley Outlaws                  | Sherman, George                     | George Sherman       | tt0033521 |
| 1746578476 | 1958 | 1958 | Saddle the Wind                       | Saddle the Wind                       | Parrish, Robert                     | Robert Parrish       | tt0050923 |
| 1746566370 | 1958 | 1958 | The Bride and the Beast               | The Bride and the Beast               | Weiss, Adrian                       | Adrian Weiss         | tt0051434 |
| 1746581776 | 1930 | 1930 | The Santa Fe Trail                    | The Santa Fe Trail                    | Brower, Otto; Knopf, Edwin H.       | Otto Brower          | tt0021055 |
| 1746484723 | 1918 | 1918 | The Brass Check                       | The Brass Check                       | Davis, William S.                   | Will S. Davis        | tt0008920 |
| 1746585403 | 1940 | 1940 | Sporting Blood                        | Sporting Blood                        | Simon, S. Sylvan                    | S. Sylvan Simon      | tt0033092 |
| 1746520430 | 1926 | 1926 | Double Daring                         | Double Daring                         | Thorpe, Richard                     | Richard Thorpe       | tt0016808 |
| 1746465065 | 1947 | 1947 | When a Girl's Beautiful               | When a Girl's Beautiful               | McDonald, Frank                     | Frank McDonald       | tt0039980 |
| 1746219360 | 1975 | 1975 | Flash and the Firecat                 | Flash and the Firecat                 | Sebastian, Ferd; Sebastian, Beverly | Beverly Sebastian    | tt0072995 |
| 1746492741 | 1944 | 1944 | Follow the Boys                       | Follow the Boys                       | Sutherland, Eddie                   | A. Edward Sutherland | tt0036832 |
| 1746491769 | 1946 | 1946 | Stars on Parade                       | Stars on Parade                       | Seiden, Joseph                      | Joseph Seiden        | tt1457603 |
| 1746454462 | 1941 | 1941 | A Very Young Lady                     | A Very Young Lady                     | Schuster, Harold                    | Harold D. Schuster   | tt0034358 |
| 1746578404 | 1963 | 1963 | The Quick and the Dead                | The Quick and the Dead                | Totten, Robert                      | Robert Totten        | tt0057441 |
| 1746508205 | 1950 | 1950 | Caged                                 | Caged                                 | Cromwell, John                      | John Cromwell        | tt0042296 |
| 1746580359 | 1938 | 1937 | Every Day's a Holiday                 | Every Day's a Holiday                 | Sutherland, A. Edward               | A. Edward Sutherland | tt0028843 |
| 1746578634 | 1959 | 1958 | Senior Prom                           | Senior Prom                           | Rich, David Lowell                  | David Lowell Rich    | tt0052181 |
| 1746571329 | 1933 | 1933 | No Other Woman                        | No Other Woman                        | Ruben, J. Walter                    | J. Walter Ruben      | tt0024388 |
| 1746436570 | 1941 | 1941 | I Was a Prisoner on Devil's Island    | I Was a Prisoner on Devil's Island    | Landers, Lew                        | Lew Landers          | tt0033742 |
| 1746500177 | 1926 | 1926 | My Old Dutch                          | My Old Dutch                          | Trimble, Lawrence                   | Laurence Trimble     | tt0017186 |
| 1746437581 | 1995 | 1995 | Halloween: The Curse of Michael Myers | Halloween: The Curse of Michael Myers | Chappelle, Joe                      | Joe Chappelle        | tt0113253 |
| 1746579007 | 1960 | 1960 | The Walking Target                    | The Walking Target                    | Cahn, Edward L.                     | Edward L. Cahn       | tt0054459 |
| 1746578577 | 1959 | 1959 | Plan 9 from Outer Space               | Plan 9 from Outer Space               | Wood, Edward D.                     | Edward D. Wood Jr.   | tt0052077 |
| 1746501551 | 1916 | 1916 | Betrayed                              | Betrayed                              | Mitchell, Howard M.                 | Howard M. Mitchell   | tt0186870 |
| 1746198264 | 1969 | 1968 | The Best of Laurel and Hardy          | The Best of Laurel and Hardy          |                                     | James L. Wolcott     | tt0196372 |
| 1746217503 | 1967 | 1966 | Savage Pampas                         | Savage Pampas                         | Fregonese, Hugo                     | Hugo Fregonese       | tt0060942 |
| 1746208369 | 1970 | 1970 | Beyond the Valley of the Dolls        | Beyond the Valley of the Dolls        | Meyer, Russ                         | Russ Meyer           | tt0065466 |
| 1746433712 | 1996 | 1996 | Independence Day                      | Independence Day                      | Emmerich, Roland                    | Roland Emmerich      | tt0116629 |
| 1746504555 | 1920 | 1920 | The Star Rover                        | The Star Rover                        | Sloman, Edward                      | Edward Sloman        | tt0197913 |
| 1746566759 | 1933 | 1933 | Ex-Lady                               | Ex Lady                               | Florey, Robert                      | Robert Florey        | tt0023993 |
| 1746581427 | 1960 | 1960 | The 3rd Voice                         | The 3rd Voice                         | Cornfield, Hubert                   | Hubert Cornfield     | tt0054380 |
| 1746532444 | 1922 | 1922 | Environment                           | Environment                           | Cummings, Irving                    | Irving Cummings      | tt0013103 |
| 1746507607 | 1927 | 1927 | The Love Thrill                       | The Love Thrill                       | Webb, Millard                       | Millard Webb         | tt0018110 |
| 1746209553 | 1968 | 1968 | Slow Run                              | Slow Run                              | Kardish, Larry                      | Laurence Kardish     | tt0228873 |
| 1746500931 | 1916 | 1916 | Tom Martin - A Man                    | Tom Martin: A Man                     | Nichols, George                     | George Nichols       | tt0467283 |
| 1745341207 | 2004 | 2004 | Wicker Park                           | Wicker Park                           | McGuigan, Paul                      | Paul McGuigan        | tt0324554 |
| 1746465182 | 1947 | 1947 | Wyoming                               | Wyoming                               | Kane, Joseph                        | Joseph Kane          | tt0040007 |
| 1746509543 | 1950 | 1950 | Lucky Losers                          | Lucky Losers                          | Beaudine, William                   | William Beaudine     | tt0042693 |
| 1746572806 | 1910 | 1910 | The Cowboy's Devotion                 | The Cowboy's Devotion                 |                                     |                      | tt1799132 |
| 1746454577 | 1996 | 1996 | High School High                      | High School High                      |                                     |                      | tt0116531 |
| 1746581339 | 1951 | 1951 | Casa Mañana                           | Casa Manana                           | Bochner, Hart                       | Hart Bochner         | tt0043383 |
|            |      |      |                                       |                                       | Yarbrough, Jean                     | Jean Yarbrough       |           |

|            |      |      |                                   |                                   |                                       |                      |           |
|------------|------|------|-----------------------------------|-----------------------------------|---------------------------------------|----------------------|-----------|
| 1746580601 | 1937 | 1937 | The Cherokee Strip                | The Cherokee Strip                | Smith, Noel                           | Noel M. Smith        | tt0028711 |
| 1746571082 | 1934 | 1933 | Eskimo                            | Eskimo                            | Van Dyke, W. S.                       | W.S. Van Dyke        | tt0023990 |
| 1746578800 | 1963 | 1964 | Ballad of a Gunfighter            | The Ballad of a Gunfighter        | Ward, Bill                            | Bill Ward            | tt0057868 |
| 1746454389 | 1944 | 1944 | Outlaw Trail                      | Outlaw Trail                      | Tansey, Robert                        | Robert Emmett Tansey | tt0037161 |
| 1746512905 | 1910 | 1910 | Pardners                          | Pardners                          | McGlynn, Frank                        | Frank McGlynn Sr.    | tt0132405 |
| 1746185889 | 1969 | 1969 | The Arrangement                   | The Arrangement                   | Kazan, Elia                           | Elia Kazan           | tt0064041 |
| 1746465305 | 1944 | 1944 | Jamboree                          | Jamboree                          | Santley, Joseph                       | Joseph Santley       | tt0036967 |
| 1746501949 | 1915 | 1915 | Gambier's Advocate                | Gambier's Advocate                | Kirkwood, James                       | James Kirkwood       | tt0005370 |
| 1745293243 | 2006 | 2006 | A Good Year                       | A Good Year                       | Scott, Ridley                         | Ridley Scott         | tt0401445 |
| 1746503527 | 1921 | 1921 | Cupid's Brand                     | Cupid's Brand                     | Lee, Rowland V.                       | Rowland V. Lee       | tt0012083 |
| 1746570169 | 1934 | 1934 | The Last Round-Up                 | The Last Round Up                 | Hathaway, Henry                       | Henry Hathaway       | tt0025370 |
| 1746567326 | 1933 | 1932 | They Just Had to Get Married      | They Just Had to Get Married      | Ludwig, Edward                        | Edward Ludwig        | tt0024654 |
| 1746198441 | 1968 | 1968 | Villa Rides                       | Villa Rides                       | Kulik, Buzz                           | Buzz Kulik           | tt0063775 |
| 1746566515 | 1933 | 1933 | King of the Jungle                | King of the Jungle                | Humberstone, H. Bruce; Marcin, Ma     | H. Bruce Humberstone | tt0024219 |
| 1746455074 | 1998 | 1998 | Psycho                            | Psycho                            | Van Sant, Gus                         | Gus Van Sant         | tt0155975 |
| 1746584660 | 1929 | 1929 | New Orleans                       | New Orleans                       | Barker, Reginald                      | Reginald Barker      | tt0020215 |
| 1746573842 | 1960 | 1960 | Spring Affair                     | Spring Affair                     | Ray, Bernard "B. B."                  | Bernard B. Ray       | tt0234789 |
| 1746570411 | 1933 | 1933 | Golden Harvest                    | Golden Harvest                    | Murphy, Ralph                         | Ralph Murphy         | tt0024071 |
| 1746422931 | 1994 | 1994 | Bullets over Broadway             | Bullets Over Broadway             | Allen, Woody                          | Woody Allen          | tt0109348 |
| 1746454037 | 1943 | 1943 | Ghosts on the Loose               | Ghosts on the Loose               | Beaudine, William                     | William Beaudine     | tt0035939 |
| 1769971187 | 1970 | 1970 | Mondo Rocco                       | Mondo Rocco                       | Rocco, Pat                            | Pat Rocco            | tt0206152 |
| 1745340983 | 2004 | 2004 | Harold & Kumar Go to White Castle | Harold & Kumar Go to White Castle | Leiner, Danny                         | Danny Leiner         | tt0366551 |
| 1769970818 | 1911 | 1911 | The Higher Law                    | The Higher Law                    | Nichols, George                       | George Nichols       | tt0410077 |
| 1746523380 | 1916 | 1916 | The Gay Lord Waring               | The Gay Lord Waring               | Turner, Otis                          | Otis Turner          | tt0006712 |
| 1746582907 | 1936 | 1936 | Here Comes Carter                 | Here Comes Carter                 | Clemens, William                      | William Clemens      | tt0025426 |
| 1746567005 | 1952 | 1952 | The Congregation                  | The Congregation                  | Beaudine, William; Calihan, William   | William Beaudine     | tt0433538 |
| 1746583529 | 1930 | 1930 | The Flirting Widow                | The Flirting Widow                | Seiter, William                       | William A. Seiter    | tt0020890 |
| 1746438931 | 1941 | 1941 | Moon Over Her Shoulder            | Moon Over Her Shoulder            | Werker, Alfred                        | Alfred L. Werker     | tt0033917 |
| 1746524157 | 1922 | 1922 | The Call of Home                  | The Call of Home                  | Gasnier, Louis J.                     | Louis J. Gasnier     | tt0012994 |
| 1746437145 | 1999 | 1999 | Inspector Gadget                  | Inspector Gadget                  | Kellogg, David                        | David Kellogg        | tt0141369 |
| 1746433706 | 2000 | 2000 | Turn It Up                        | Turn It Up                        | Adetuyi, Robert                       | Robert Adetuyi       | tt0216772 |
| 1745340101 | 2004 | 2003 | The Yes Men                       | The Yes Men                       | Smith, Chris; Ollman, Dan ; Price, Sa | Dan Ollman           | tt0379593 |
| 1746502209 | 1915 | 1915 | The Little Mademoiselle           | The Little Mademoiselle           | Eagle, Oscar                          | Oscar Eagle          | tt0005632 |
| 1746582401 | 1937 | 1937 | The Arizona Gunfighter            | Arizona Gunfighter                | Newfield, Sam                         | Sam Newfield         | tt0028583 |
| 1746515260 | 1918 | 1918 | Breakers Ahead                    | Breakers Ahead                    | Brabin, Charles J.                    | Charles Brabin       | tt0008924 |
| 1769971122 | 1969 | 1969 | Monica's Thing                    | Monica's Thing                    | Brand, Rex                            | Rex Brand            | tt0794125 |
| 1746514826 | 1916 | 1916 | Three Pals                        | The Three Pals                    | Berger, Rea                           | Rae Berger           | tt0159023 |
| 1746419910 | 1989 | 1989 | Wired                             | Wired                             | Peerce, Larry                         | Larry Peerce         | tt0098660 |
| 1746581547 | 1930 | 1930 | Three Faces East                  | Three Faces East                  | Del Ruth, Roy                         | Roy Del Ruth         | tt0021472 |
| 1746464899 | 1946 | 1946 | The Harvey Girls                  | The Harvey Girls                  | Sidney, George                        | George Sidney        | tt0038589 |
| 1746574525 | 1935 | 1935 | Circus Shadows                    | Circus Shadows                    | Hutchinson, Charles                   | Charles Hutchison    | tt0026214 |
| 1746582078 | 1910 | 1910 | A Gold Necklace                   | A Gold Necklace                   | Powell, Frank                         | Frank Powell         | tt0001235 |
| 1746561383 | 1932 | 1932 | No Man of Her Own                 | No Man of Her Own                 | Ruggles, Wesley                       | Wesley Ruggles       | tt0023277 |
| 1746524101 | 1923 | 1923 | Bag and Baggage                   | Bag and Baggage                   | Fox, Finis                            | Finis Fox            | tt0013857 |
| 1746500084 | 1924 | 1924 | Janice Meredith                   | Janice Meredith                   | Hopper, E. Mason                      | E. Mason Hopper      | tt0015022 |
| 1746520793 | 1926 | 1926 | Perils of the Coast Guard         | Perils of the Coast Guard         | Apfel, Oscar                          | Oscar Apfel          | tt0017259 |
| 1746498308 | 1918 | 1918 | The Crucible of Life              | The Crucible of Life              | Lambert, Captain Harry                | Harry Lambert        | tt0184365 |
| 1746455376 | 1995 | 1995 | Bye Bye Love                      | Bye Bye Love                      | Weisman, Sam                          | Sam Weisman          | tt0112606 |
| 1746499971 | 1945 | 1945 | War Comes to America              | War Comes to America              |                                       | Frank Capra          | tt0183997 |
| 1746453579 | 1942 | 1942 | Madame Spy                        | Madame Spy                        | Neill, Roy William                    | Roy William Neill    | tt0035010 |
| 1746500686 | 1949 | 1949 | The Crime Doctor's Diary          | The Crime Doctor's Diary          | Friedman, Seymour                     | Seymour Friedman     | tt0041267 |
| 1746508246 | 1949 | 1949 | The Big Cat                       | The Big Cat                       | Karlson, Phil                         | Phil Karlson         | tt0041175 |
| 1746454059 | 1943 | 1943 | Henry Aldrich Gets Glamour        | Henry Aldrich Gets Glamour        | Bennett, Hugh                         | Hugh Bennett         | tt0035983 |
| 1746474412 | 1943 | 1943 | Wings Over the Pacific            | Wings Over the Pacific            | Rosen, Phil                           | Phil Rosen           | tt0135055 |
| 1746577270 | 1960 | 1960 | The Amazing Transparent Man       | The Amazing Transparent Man       | Ulmer, Edgar G.                       | Edgar G. Ulmer       | tt0053593 |
| 1746583653 | 1930 | 1930 | Extravagance                      | Extravagance                      | Rosen, Phil                           | Phil Rosen           | tt0020866 |
| 1746393749 | 1987 | 1987 | The Bedroom Window                | The Bedroom Window                | Hanson, Curtis                        | Curtis Hanson        | tt0092627 |

|            |      |      |                                    |                                    |                        |                       |           |
|------------|------|------|------------------------------------|------------------------------------|------------------------|-----------------------|-----------|
| 1769970056 | 1914 | 1914 | The Stain                          | The Stain                          | Powell, Frank          | Frank Powell          | tt0209347 |
| 1746574711 | 1933 | 1933 | Corruption                         | Corruption                         | Roberts, C. Edward     | Charles E. Roberts    | tt0023909 |
| 1746573876 | 1957 | 1957 | The Story of Mankind               | The Story of Mankind               | Allen, Irwin           | Irwin Allen           | tt0051016 |
| 1746525105 | 1920 | 1920 | The Woman and the Puppet           | The Woman and the Puppet           | Barker, Reginald       | Reginald Barker       | tt0011873 |
| 1746577275 | 1950 | 1950 | State Penitentiary                 | State Penitentiary                 | Landers, Lew           | Lew Landers           | tt0042999 |
| 1746514394 | 1910 | 1910 | Marriage in Haste                  | Marriage in Haste                  |                        |                       | tt1800716 |
| 1746393465 | 1988 | 1988 | Twins                              | Twins                              | Reitman, Ivan          | Ivan Reitman          | tt0096320 |
| 1746570815 | 1933 | 1933 | Melody Cruise                      | Melody Cruise                      | Sandrich, Mark         | Mark Sandrich         | tt0024323 |
| 1745342328 | 2002 | 2001 | The Grey Zone                      | The Grey Zone                      | Nelson, Tim Blake      | Tim Blake Nelson      | tt0252480 |
| 1746573918 | 1960 | 1960 | Bells Are Ringing                  | Bells Are Ringing                  | Minnelli, Vincente     | Vincente Minnelli     | tt0053645 |
| 1746571340 | 1934 | 1934 | I'll Tell the World                | I'll Tell the World                | Sedgwick, Edward       | Edward Sedgwick       | tt0025289 |
| 1745272504 | 2001 | 2001 | The Brothers                       | The Brothers                       | Hardwick, Gary         | Gary Hardwick         | tt0250274 |
| 1746585335 | 1929 | 1929 | Scandal                            | Scandal                            | Ruggles, Wesley        | Wesley Ruggles        | tt0020367 |
| 1746566075 | 1956 | 1955 | There's Always Tomorrow            | There's Always Tomorrow            | Sirk, Douglas          | Douglas Sirk          | tt0049843 |
| 1746525038 | 1920 | 1920 | Paris Green                        | Paris Green                        | Storm, Jerome          | Jerome Storm          | tt0196827 |
| 1746574448 | 1962 | 1962 | Kid Galahad                        | Kid Galahad                        | Karlson, Phil          | Phil Karlson          | tt0056138 |
| 1746421964 | 1981 | 1981 | Eyewitness                         | Eyewitness                         | Yates, Peter           | Peter Yates           | tt0082353 |
| 1746584501 | 1929 | 1929 | Hard To Get                        | Hard to Get                        | Beaudine, William      | William Beaudine      | tt0019963 |
| 1746499915 | 1949 | 1949 | Rose of the Yukon                  | Rose of the Yukon                  | Blair, George          | George Blair          | tt0174172 |
| 1746569672 | 1957 | 1957 | Gun Duel in Durango                | Gun Duel in Durango                | Salkow, Sidney         | Sidney Salkow         | tt0050466 |
| 1746523707 | 1923 | 1923 | The Spoilers                       | The Spoilers                       | Hillyer, Lambert       | Lambert Hillyer       | tt0014503 |
| 1746566357 | 1953 | 1953 | A Slight Case of Larceny           | A Slight Case of Larceny           | Weis, Don              | Don Weis              | tt0046329 |
| 1746500259 | 1925 | 1925 | Tricks                             | Tricks                             | Mitchell, Bruce        | Bruce Mitchell        | tt0016453 |
| 1746501082 | 1916 | 1916 | The Moral Fabric                   | The Moral Fabric                   | Miller, Charles        | Raymond B. West       | tt0007091 |
| 1746514777 | 1915 | 1915 | Colorado                           | Colorado                           | MacGregor, Norval      | Norval MacGregor      | tt0005123 |
| 1745303061 | 2007 | 2007 | Great World of Sound               | Great World of Sound               | Zobel, Craig           | Craig Zobel           | tt0826547 |
| 1746508074 | 1925 | 1925 | Silent Pal                         | Silent Pal                         | McCarty, Henry         | Henry McCarty         | tt0164169 |
| 1746211238 | 1973 | 1973 | The Female Response                | The Female Response                | Kincaid, Tim           | Tim Kincaid           | tt0148130 |
| 1746500429 | 1925 | 1925 | His Supreme Moment                 | His Supreme Moment                 | Fitzmaurice, George    | George Fitzmaurice    | tt0015920 |
| 1746500074 | 1925 | 1925 | The Mansion of Aching Hearts       | The Mansion of Aching Hearts       | Hogan, James P.        | James P. Hogan        | tt0016089 |
| 1746422917 | 1993 | 1993 | What's Eating Gilbert Grape        | What's Eating Gilbert Grape        | Hallström, Lasse       | Lasse Hallström       | tt0108550 |
| 1746454671 | 1946 | 1946 | My Reputation                      | My Reputation                      | Bernhardt, Curtis      | Curtis Bernhardt      | tt0038765 |
| 1746503351 | 1920 | 1919 | The Spenders                       | The Spender                        | Conway, Jack           | Charles Swickard      | tt0192627 |
| 1746582728 | 1937 | 1937 | She Had to Eat                     | She Had to Eat                     | St. Clair, Malcolm     | Malcolm St. Clair     | tt0029549 |
| 1746577404 | 1951 | 1951 | No Highway in the Sky              | No Highway in the Sky              | Koster, Henry          | Henry Koster          | tt0043859 |
| 1746570574 | 1934 | 1934 | The Fighting Trooper               | The Fighting Trooper               | Taylor, Ray            | Ray Taylor            | tt0025114 |
| 1746465170 | 1942 | 1942 | Valley of Hunted Men               | Valley of Hunted Men               | English, John          | John English          | tt0035500 |
| 1746583894 | 1930 | 1930 | Fast and Loose                     | Fast and Loose                     | Newmeyer, Fred         | Fred C. Newmeyer      | tt0020873 |
| 1746436542 | 1941 | 1941 | The Nurse's Secret                 | The Nurse's Secret                 | Smith, Noel M.         | Noel M. Smith         | tt0033966 |
| 1746583253 | 1928 | 1928 | Forbidden Trails                   | Forbidden Trails                   | Horner, Robert J.      | Robert J. Horner      | tt0325411 |
| 1746437399 | 1943 | 1943 | Gildersleeve on Broadway           | Gildersleeve on Broadway           | Douglas, Gordon        | Gordon Douglas        | tt0035940 |
| 1746409033 | 1984 | 1984 | The Cotton Club                    | The Cotton Club                    | Coppola, Francis       | Francis Ford Coppola  | tt0087089 |
| 1746581435 | 1928 | 1928 | The Wedding March                  | The Wedding March                  | Stroheim, Erich von    | Erich von Stroheim    | tt0019558 |
| 1746580694 | 1935 | 1935 | Heir to Trouble                    | Heir to Trouble                    | Bennet, Spencer Gordon | Spencer Gordon Bennet | tt0027728 |
| 1746530797 | 1950 | 1950 | Bandit Queen                       | Bandit Queen                       | Berke, William         | William Berke         | tt0042224 |
| 1746235345 | 1971 | 1971 | The Incredible 2-Headed Transplant | The Incredible 2 Headed Transplant | Lanza, Anthony M.      | Anthony M. Lanza      | tt0067245 |
| 1746583326 | 1929 | 1929 | West of the Rockies                | West of the Rockies                | Carpenter, H. B.       | Horace B. Carpenter   | tt0020576 |
| 1746559881 | 1963 | 1963 | Lilies of the Field                | Lilies of the Field                | Nelson, Ralph          | Ralph Nelson          | tt0057251 |
| 1746581165 | 1951 | 1950 | Hunt the Man Down                  | Hunt the Man Down                  | Archainbaud, George    | George Archainbaud    | tt0042582 |
| 1746581472 | 1910 | 1910 | How Hubby Got a Raise              | How Hubby Got a Raise              | Powell, Frank          | Frank Powell          | tt0362736 |
| 1746508879 | 1926 | 1926 | Tangled Herds                      | Tangled Herds                      | Bertram, William       | William Bertram       | tt0168209 |
| 1746512069 | 1914 | 1914 | The Country Mouse                  | The Country Mouse                  | Bosworth, Hobart       | Hobart Bosworth       | tt0003798 |
| 1746565925 | 1953 | 1953 | Iron Mountain Trail                | Iron Mountain Trail                | Witney, William        | William Witney        | tt0045918 |
| 1746497631 | 1919 | 1919 | Sue of the South                   | Sue of the South                   | Moore, W. Eugene       | Eugene Moore          | tt0010743 |
| 1746454027 | 1942 | 1942 | In This Our Life                   | In This Our Life                   | Huston, John           | John Huston           | tt0034890 |
| 1746234249 | 1966 | 1966 | The Talisman                       | The Talisman                       | Carr, John             | John Carr             | tt0061064 |
| 1746515023 | 1916 | 1916 | The Wild Girl of the Sierras       | A Wild Girl of the Sierras         | Powell, Paul           | Paul Powell           | tt0007571 |

|            |      |      |                                |                                |                         |                       |           |
|------------|------|------|--------------------------------|--------------------------------|-------------------------|-----------------------|-----------|
| 1746503253 | 1920 | 1920 | Honeymoon Ranch                | Honeymoon Ranch                | Townley, Robert         | Robin H. Townley      | tt0195796 |
| 1746520887 | 1950 | 1950 | Fast on the Draw               | Fast on the Draw               | Carr, Thomas            | Thomas Carr           | tt0042448 |
| 1746574514 | 1934 | 1934 | A Lost Lady                    | A Lost Lady                    | Green, Alfred E.        | Alfred E. Green       | tt0025422 |
| 1745293560 | 2007 | 2007 | P2                             | P2                             | Khalfour, Franck        | Franck Khalfour       | tt0804516 |
| 1746499946 | 1923 | 1923 | The Glimpses of the Moon       | The Glimpses of the Moon       | Dwan, Allan             | Allan Dwan            | tt0014086 |
| 1746513621 | 1916 | 1916 | The Little Sister of the Poor  | The Little Sister of the Poor  | Mayo, Melvin            | Melvin Mayo           | tt0490641 |
| 1746508257 | 1927 | 1927 | The Telephone Girl             | The Telephone Girl             | Brenon, Herbert         | Herbert Brenon        | tt0018469 |
| 1746574858 | 1935 | 1935 | The Big Broadcast of 1936      | The Big Broadcast of 1936      | Taugo, Norman           | Norman Taurog         | tt0026113 |
| 1746210027 | 1970 | 1970 | The Out-of-Towners             | The Out of Towners             | Hiller, Arthur          | Arthur Hiller         | tt0066193 |
| 1746393022 | 1985 | 1985 | That Was Then... This Is Now   | That Was Then... This Is Now   | Cain, Christopher       | Christopher Cain      | tt0090151 |
| 1746524956 | 1916 | 1916 | Land O' Lizards                | Land o' Lizards                | Borzage, Frank          | Frank Borzage         | tt0006907 |
| 1746437852 | 1941 | 1941 | Saddle Mountain Roundup        | Saddle Mountain Roundup        | Luby, S. Roy            | S. Roy Luby           | tt0035280 |
| 1746516070 | 1921 | 1921 | The Sport of the Gods          | The Sport of the Gods          | Vernot, Henry           | Henry J. Vernot       | tt0166362 |
| 1746424060 | 1940 | 1940 | Always a Bride                 | Always a Bride                 | Smith, Noel M.          | Noel M. Smith         | tt0032198 |
| 1746514357 | 1927 | 1927 | His First Flame                | His First Flame                | Edwards, Harry          | Harry Edwards         | tt0016971 |
| 1746466522 | 1917 | 1917 | The Curse of Eve               | The Curse of Eve               | Beal, Frank             | Frank Beal            | tt0014052 |
| 1746420790 | 1982 | 1982 | The Dark Crystal               | The Dark Crystal               | Henson, Jim; Oz, Frank  | Jim Henson            | tt0083791 |
| 1746514534 | 1923 | 1923 | Purple Dawn                    | The Purple Dawn                | Seeling, Charles R.     | Charles R. Seeling    | tt0014383 |
| 1746573947 | 1962 | 1962 | The Nun and the Sergeant       | The Nun and the Sergeant       | Adreon, Franklin        | Franklin Adreon       | tt0056296 |
| 1746571281 | 1952 | 1952 | Son of Ali Baba                | Son of Ali Baba                | Neumann, Kurt           | Kurt Neumann          | tt0045175 |
| 1746585318 | 1928 | 1928 | Beggars of Life                | Beggars of Life                | Wellman, William A.     | William A. Wellman    | tt0018684 |
| 1746508393 | 1924 | 1924 | Worldly Goods                  | Worldly Goods                  | Bern, Paul              | Paul Bern             | tt0015512 |
| 1746410010 | 1987 | 1987 | Million Dollar Mystery         | Million Dollar Mystery         | Fleischer, Richard      | Richard Fleischer     | tt0093539 |
| 1746499959 | 1923 | 1923 | The Girl of the Golden West    | The Girl of the Golden West    | Carewe, Edwin           | Edwin Carewe          | tt0014085 |
| 1746574218 | 1959 | 1958 | The Naked Maja                 | The Naked Maja                 | Koster, Henry           | Henry Koster          | tt0051891 |
| 1746574447 | 1961 | 1961 | The Roman Spring of Mrs. Stone | The Roman Spring of Mrs. Stone | Quintero, José          | José Quintero         | tt0055382 |
| 1745375174 | 2008 | 2007 | The Air I Breathe              | The Air I Breathe              | Lee, Jieho              | Jieho Lee             | tt0485851 |
| 1746438140 | 1941 | 1941 | Cracked Nuts                   | Cracked Nuts                   | Cline, Edward           | Edward F. Cline       | tt0033497 |
| 1746584204 | 1939 | 1939 | Pride of the Blue Grass        | Pride of the Blue Grass        | McGann, William         | William C. McGann     | tt0031823 |
| 1746583855 | 1929 | 1929 | Geraldine                      | Geraldine                      | Brown, Melville         | Melville W. Brown     | tt0019921 |
| 1746491724 | 1948 | 1948 | Docks of New Orleans           | Docks of New Orleans           | Abrahams, Derwin        | Derwin Abrahams       | tt0040296 |
| 1769971202 | 1969 | 1969 | Sex Circus                     | Sex Circus                     | Goetz, Tommy            | Tommy Goetz           | tt0257137 |
| 1746574250 | 1962 | 1961 | Bachelor Flat                  | Bachelor Flat                  | Tashlin, Frank          | Frank Tashlin         | tt0054651 |
| 1746577880 | 1938 | 1938 | The Law West of Tombstone      | The Law West of Tombstone      | Tryon, Glenn            | Glenn Tryon           | tt0030350 |
| 1746508429 | 1926 | 1925 | The Golden Cocoon              | The Golden Cocoon              | Webb, Millard           | Millard Webb          | tt0015868 |
| 1746422050 | 1998 | 1997 | Eden                           | Men                            | Goldberg, Howard        | Zoe Clarke            | tt0119653 |
| 1746568330 | 1934 | 1934 | The Ferocious Pal              | Ferocious Pal                  | Bennett, Spencer Gordon | Spencer Gordon Bennet | tt0167155 |
| 1746473735 | 1942 | 1942 | Pardon My Sarong               | Pardon My Sarong               | Kenton, Erle C.         | Erle C. Kenton        | tt0035173 |
| 1746474119 | 1948 | 1947 | The Bishop's Wife              | The Bishop's Wife              | Koster, Henry           | Henry Koster          | tt0039190 |
| 1746515008 | 1917 | 1917 | The Girl in the Checkered Coat | The Girl in the Checkered Coat | Grasse, Joseph de       | Joseph De Grasse      | tt0008009 |
| 1746423560 | 1997 | 1997 | Running Time                   | Running Time                   | Becker, Josh            | Josh Becker           | tt0120042 |
| 1746485231 | 1918 | 1918 | For Freedom                    | For Freedom                    | Lloyd, Frank            | Frank Lloyd           | tt0009083 |
| 1746500261 | 1924 | 1924 | After Dark                     | After Dark                     | Chapin, James           | James Chapin          | tt0014647 |
| 1746503372 | 1921 | 1921 | The Girl From Nowhere          | The Girl from Nowhere          | Archainbaud, George     | George Archainbaud    | tt0012217 |
| 1745342043 | 2001 | 2001 | L.I.E.                         | L.I.E.                         | Cuesta, Michael         | Michael Cuesta        | tt0242587 |
| 1746502439 | 1922 | 1922 | The Inner Man                  | The Inner Man                  | Smith, Hamilton         | Hamilton Smith        | tt0124756 |
| 1746514333 | 1910 | 1910 | The Stars and Stripes          | The Stars and Stripes          | Dawley, J. Searle       | J. Searle Dawley      | tt0234795 |
| 1746578845 | 1959 | 1959 | Last Train from Gun Hill       | Last Train from Gun Hill       | Sturges, John           | John Sturges          | tt0052993 |
| 1769974391 | 1916 | 1916 | His Wife Knew About It         | His Wife Knew About It         | Drew, Sidney            | Sidney Drew           | tt0154599 |
| 1746503337 | 1918 | 1918 | Ace High                       | Ace High                       | Reynolds, Lynn          | Lynn Reynolds         | tt0008814 |
| 1745340329 | 2001 | 2001 | Maze                           | Made                           | Morrow, Rob             | Jon Favreau           | tt0227005 |
| 1746476199 | 1946 | 1946 | Beale Street Mama              | Beale Street Mama              | Williams, Spencer       | Spencer Williams      | tt0038337 |
| 1746496982 | 1920 | 1920 | Flames of the Flesh            | Flames of the Flesh            | Le Saint, Edward J.     | Edward LeSaint        | tt0011190 |
| 1746583150 | 1940 | 1940 | The Bank Dick                  | The Bank Dick                  | Cline, Edward           | Edward F. Cline       | tt0032234 |
| 1746580901 | 1935 | 1935 | Transient Lady                 | Transient Lady                 | Buzzell, Edward         | Edward Buzzell        | tt0027132 |
| 1746577337 | 1959 | 1959 | The Remarkable Mr. Pennypacker | The Remarkable Mr. Pennypacker | Levin, Henry            | Henry Levin           | tt0053214 |
| 1746453555 | 1943 | 1943 | I Escaped From the Gestapo     | I Escaped from the Gestapo     | Young, Harold           | Harold Young          | tt0036026 |

|                   |             |             |                                 |                                 |                                  |                        |                  |
|-------------------|-------------|-------------|---------------------------------|---------------------------------|----------------------------------|------------------------|------------------|
| 1746421305        | 1999        | 1999        | Universal Soldier: The Return   | Universal Soldier: The Return   | Rodgers, Mic                     | Mic Rodgers            | tt0176269        |
| 1746219556        | 1977        | 1977        | Airport '77                     | Airport '77                     | Jameson, Jerry                   | Jerry Jameson          | tt0075648        |
| 1746438557        | 1996        | 1996        | The Nutty Professor             | The Nutty Professor             | Shadyac, Tom                     | Tom Shadyac            | tt0117218        |
| 1746500365        | 1925        | 1925        | The Man on the Box              | The Man on the Box              | Reisner, Charles                 | Charles Reisner        | tt0016083        |
| 1746515059        | 1921        | 1921        | Diane of Star Hollow            | Diane of Star Hollow            | Sellers, Oliver L.               | Oliver L. Sellers      | tt0322018        |
| 1746408837        | 1983        | 1983        | Get Crazy                       | Get Crazy                       | Arkush, Allan                    | Allan Arkush           | tt0085551        |
| 1746584769        | 1929        | 1929        | Smiling Irish Eyes              | Smiling Irish Eyes              | Seiter, William A.               | William A. Seiter      | tt0020421        |
| 1746233135        | 1969        | 1969        | The Big Cube                    | The Big Cube                    | Davison, Tito                    | Tito Davison           | tt0064088        |
| 1746437012        | 1940        | 1940        | Third Finger, Left Hand         | Third Finger, Left Hand         | Leonard, Robert Z.               | Robert Z. Leonard      | tt0033153        |
| 1746504779        | 1917        | 1916        | On Dangerous Ground             | On Dangerous Ground             | Thornby, Robert                  | Murdock MacQuarrie     | tt0325923        |
| 1746491972        | 1944        | 1944        | Marine Raiders                  | Marine Raiders                  | Schuster, Harold                 | Harold D. Schuster     | tt0037048        |
| 1746585095        | 1929        | 1929        | The One Man Dog                 | The One Man Dog                 | d'Usseau, Leon                   | Leon D'Usseau          | tt0145200        |
| 1746582307        | 1950        | 1950        | Perfect Strangers               | Perfect Strangers               | Windust, Bretaigne               | Bretaigne Windust      | tt0042841        |
| 1746520617        | 1925        | 1925        | Crack o' Dawn                   | Crack o' Dawn                   | Rogell, Albert                   | Albert S. Rogell       | tt0015713        |
| 1746419916        | 1994        | 1993        | Blink                           | Blink                           | Apted, Michael                   | Michael Apted          | tt0109297        |
| 1746492249        | 1946        | 1946        | Stagecoach to Denver            | Stagecoach to Denver            | Springsteen, R. G.               | R.G. Springsteen       | tt0038979        |
| 1746473913        | 1944        | 1944        | None Shall Escape               | None Shall Escape               | DeToth, Andre                    | André De Toth          | tt0037136        |
| 1746500354        | 1925        | 1925        | Don X                           | Don X                           | Sheldon, Forrest                 | Forrest Sheldon        | tt0130628        |
| 1746500323        | 1924        | 1924        | The Last of the Duanes          | The Last of the Duanes          | Reynolds, Lynn                   | Lynn Reynolds          | tt0015052        |
| 1745373742        | 2010        | 2009        | Brooklyn's Finest               | Brooklyn's Finest               | Fuqua, Antoine                   | Antoine Fuqua          | tt1210042        |
| 1746574614        | 1937        | 1937        | We're on the Jury               | We're on the Jury               | Holmes, Ben                      | Ben Holmes             | tt0029750        |
| 1746585043        | 1940        | 1939        | Midnight Shadow                 | Midnight Shadow                 | Randol, George                   | George Randol          | tt0031648        |
| 1746584671        | 1930        | 1930        | Recaptured Love                 | Recaptured Love                 | Adolfi, John G.                  | John G. Adolfi         | tt0021289        |
| 1746554845        | 1957        | 1957        | The Lonely Man                  | The Lonely Man                  | Levin, Henry                     | Henry Levin            | tt0050652        |
| 1746565966        | 1953        | 1953        | Saginaw Trail                   | Saginaw Trail                   | Archainbaud, George              | George Archainbaud     | tt0046266        |
| 1746501752        | 1915        | 1915        | The Strategist                  | The Strategist                  | MacGregor, Norval                | Norval MacGregor       | tt1276427        |
| 1745358068        | 2003        | 2003        | Gigli                           | Gigli                           | Brest, Martin                    | Martin Brest           | tt0299930        |
| 1745293370        | 2005        | 2005        | The Comedians of Comedy         | The Comedians of Comedy         | Blieden, Michael                 | Michael Blieden        | tt0451021        |
| 1746199279        | 1966        | 1966        | Santa's Christmas Circus        | Santa's Christmas Circus        | Wiziarde, Frank                  | Frank Wiziarde         | tt0170547        |
| 1746578566        | 1962        | 1962        | House of Women                  | House of Women                  | Doniger, Walter                  | Walter Doniger         | tt0056082        |
| 1746545340        | 1940        | 1940        | The Secret Seven                | The Secret Seven                | Moore, James                     | James Moore            | tt0033032        |
| 1746514378        | 1915        | 1915        | The Man of Shame                | The Man of Shame                | Myers, Harry C.                  | Harry Myers            | tt0005708        |
| 1746572015        | 1910        | 1910        | The Courtship of Miles Standish | The Courtship of Miles Standish |                                  | Otis Turner            | tt0001166        |
| 1746577046        | 1959        | 1959        | Ride Lonesome                   | Ride Lonesome                   | Boetticher, Budd                 | Budd Boetticher        | tt0053220        |
| 1746453498        | 1941        | 1941        | Adventure in Washington         | Adventure in Washington         | Green, Alfred E.                 | Alfred E. Green        | tt0033315        |
| 1746577577        | 1935        | 1935        | Spring Tonic                    | Spring Tonic                    | Bruckman, Clyde; Brown, Melville | Clyde Bruckman         | tt0027034        |
| 1746570305        | 1934        | 1934        | King Kelly of the U.S.A.        | King Kelly of the U.S.A.        | Fields, Leonard                  | Leonard Fields         | tt0025349        |
| 1746499844        | 1947        | 1947        | Fiesta                          | Fiesta                          | Thorpe, Richard                  | Richard Thorpe         | tt0039377        |
| 1746465057        | 1945        | 1945        | Eve Knew Her Apples             | Eve Knew Her Apples             | Jason, Will                      | Will Jason             | tt0037685        |
| 1746580897        | 1939        | 1939        | King of Chinatown               | King of Chinatown               | Grinde, Nick                     | Nick Grinde            | tt0031534        |
| <b>1746467009</b> | <b>1917</b> | <b>1917</b> | <b>Mother Love and the Law</b>  | <b>Mother Love and the Law</b>  | <b>Siegmann, George A.</b>       | <b>George Siegmann</b> | <b>tt0008324</b> |
| 1769969816        | 1911        | 1911        | The Mexican                     | The Mexican                     |                                  |                        | tt0364514        |
| 1746209104        | 1965        | 1965        | That Darn Cat                   | That Darn Cat!                  | Stevenson, Robert                | Robert Stevenson       | tt0059793        |
| 1746218120        | 1967        | 1966        | The Venetian Affair             | The Venetian Affair             | Thorpe, Jerry                    | Jerry Thorpe           | tt0062432        |
| 1746500607        | 1925        | 1925        | A Thief in Paradise             | A Thief in Paradise             | Fitzmaurice, George              | George Fitzmaurice     | tt0015399        |
| 1746423990        | 1943        | 1943        | Bar 20                          | Bar 20                          | Selander, Lesley                 | Lesley Selander        | tt0035663        |
| 1745373801        | 2004        | 2004        | Alfie                           | Alfie                           | Shyer, Charles                   | Charles Shyer          | tt0375173        |
| 1769976722        | 1929        | 1929        | The Doll Shop                   | The Doll Shop                   | Lee, Sammy                       | Sammy Lee              | tt0370475        |
| 1746500841        | 1915        | 1915        | The Avalanche                   | The Avalanche                   | Davis, Will S.                   | Will S. Davis          | tt0004928        |
| 1746583134        | 1937        | 1937        | Dead End                        | Dead End                        | Wylor, William                   | William Wylor          | tt0028773        |
| 1746580267        | 1935        | 1935        | Love in Bloom                   | Love in Bloom                   | Nugent, Elliott                  | Elliott Nugent         | tt0026656        |
| 1745302251        | 2006        | 2006        | See No Evil                     | See No Evil                     | Dark, Gregory                    | Gregory Dark           | tt0437179        |
| 1746509501        | 1924        | 1924        | The Torrent                     | Torment                         | Younger, A. P.; Doner, William   | Maurice Tourneur       | tt0015421        |
| 1746491990        | 1948        | 1948        | Man from Texas                  | The Man from Texas              | Jason, Leigh                     | Leigh Jason            | tt0040565        |
| 1746559991        | 1963        | 1963        | Wives and Lovers                | Wives and Lovers                | Rich, John                       | John Rich              | tt0057688        |
| 1746520884        | 1949        | 1949        | Strange Bargain                 | Strange Bargain                 | Price, Will                      | Will Price             | tt0041926        |
| 1746574418        | 1951        | 1951        | Cattle Drive                    | Cattle Drive                    | Neumann, Kurt                    | Kurt Neumann           | tt0043389        |

|                   |             |             |                                          |                                      |                                 |                      |                  |
|-------------------|-------------|-------------|------------------------------------------|--------------------------------------|---------------------------------|----------------------|------------------|
| 1746569991        | 1957        | 1957        | The Tin Star                             | The Tin Star                         | Mann, Anthony                   | Anthony Mann         | tt0051087        |
| 1746584352        | 1936        | 1936        | The Devil Is a Sissy                     | The Devil Is a Sissy                 | Van Dyke, W. S.; Brown, Rowland | W. S. Van Dyke       | tt0027518        |
| 1746585317        | 1930        | 1930        | Bar L Ranch                              | Bar L Ranch                          | Webb, Harry                     | Harry S. Webb        | tt0020665        |
| 1746208372        | 1968        | 1968        | Therese and Isabelle                     | Therese and Isabelle                 | Metzger, Radley H.              | Radley Metzger       | tt0063683        |
| 1746566323        | 1957        | 1957        | The Young Stranger                       | The Young Stranger                   | Frankenheimer, John             | John Frankenheimer   | tt0051214        |
| 1746453528        | 1943        | 1942        | China Girl                               | China Girl                           | Hathaway, Henry                 | Henry Hathaway       | tt0034593        |
| 1746219199        | 1980        | 1980        | Melvin and Howard                        | Melvin and Howard                    | Demme, Jonathan                 | Jonathan Demme       | tt0081150        |
| <b>1745340029</b> | <b>2002</b> | <b>2002</b> | <b>Two Weeks Notice</b>                  | <b>Two Weeks Notice</b>              | <b>Lawrence, Marc</b>           | <b>Marc Lawrence</b> | <b>tt0313737</b> |
| 1746504051        | 1919        | 1919        | The Red Viper                            | The Red Viper                        | Tyrol, Jacques                  | Jacques Tyrol        | tt0010617        |
| 1746574472        | 1952        | 1952        | Red Planet Mars                          | Red Planet Mars                      | Horner, Harry                   | Harry Horner         | tt0045073        |
| 1746513831        | 1916        | 1916        | Madame X                                 | Madame X                             | Marion, George F.               | George F. Marion     | tt0007001        |
| 1746424198        | 1942        | 1942        | Moontide                                 | Moontide                             | Mayo, Archie; Lang, Fritz       | Archie Mayo          | tt0035082        |
| 1745341297        | 2001        | 2001        | Joe Somebody                             | Joe Somebody                         | Pasquin, John                   | John Pasquin         | tt0279889        |
| 1746532930        | 1927        | 1927        | The Shamrock and the Rose                | The Shamrock and the Rose            | Nelson, Jack                    | Jack Nelson          | tt0018382        |
| 1746565957        | 1954        | 1954        | Jail Bait                                | Jail Bait                            | Wood, Edward D.                 | Edward D. Wood Jr.   | tt0047127        |
| 1746454633        | 1941        | 1941        | Lydia                                    | Lydia                                | Duvivier, Julien                | Julien Duvivier      | tt0033858        |
| 1746583827        | 1930        | 1930        | The Man Hunter                           | The Man Hunter                       | Lederman, Ross                  | D. Ross Lederman     | tt0021113        |
| 1746465261        | 1942        | 1942        | The Night Before the Divorce             | The Night Before the Divorce         | Siodmak, Robert                 | Robert Siodmak       | tt0035122        |
| 1746574948        | 1937        | 1937        | Idol of the Crowds                       | Idol of the Crowds                   | Lubin, Arthur                   | Arthur Lubin         | tt0029044        |
| 1746573188        | 1910        | 1910        | Effecting a Cure                         | Effecting a Cure                     | Powell, Frank                   | Frank Powell         | tt0001191        |
| 1746509029        | 1925        | 1925        | The Girl Who Wouldn't Work               | The Girl Who Wouldn't Work           | De Sano, Marcel                 | Marcel De Sano       | tt0015860        |
| 1746581383        | 1951        | 1951        | Bowery Battalion                         | Bowery Battalion                     | Beaudine, William               | William Beaudine     | tt0043356        |
| 1746393426        | 1987        | 1987        | Hamburger Hill                           | Hamburger Hill                       | Irvin, John                     | John Irvin           | tt0093137        |
| 1746503984        | 1918        | 1918        | The Still Alarm                          | The Still Alarm                      | Campbell, Colin                 | Colin Campbell       | tt0009653        |
| 1746584154        | 1938        | 1938        | The Road to Reno                         | The Road to Reno                     | Simon, S. Sylvan                | S. Sylvan Simon      | tt0030685        |
| 1746584098        | 1935        | 1935        | The Eagle's Brood                        | The Eagle's Brood                    | Bretherton, Howard              | Howard Bretherton    | tt0026303        |
| 1746453980        | 1995        | 1995        | Ace Ventura: When Nature Calls           | Ace Ventura: When Nature Calls       | Oederkerk, Steve                | Steve Oederkerk      | tt0112281        |
| 1746422913        | 1999        | 1999        | Hard                                     | Hard                                 | Huckert, John                   | Mike Mitchell        | tt0194006        |
| 1746577141        | 1950        | 1950        | A Ticket to Tomahawk                     | A Ticket to Tomahawk                 | Sale, Richard                   | Richard Sale         | tt0043046        |
| 1746570727        | 1952        | 1952        | The Sniper                               | The Sniper                           | Dmytryk, Edward                 | Edward Dmytryk       | tt0045161        |
| 1746422542        | 1998        | 1997        | Orgazmo                                  | Orgazmo                              | Parker, Trey                    | Trey Parker          | tt0124819        |
| 1746503230        | 1919        | 1919        | Crimson Shoals                           | Crimson Shoals                       | Ford, Francis                   | Francis Ford         | tt0190330        |
| 1746554032        | 1965        | 1965        | Young Dillinger                          | Young Dillinger                      | Morse, Terry O.                 | Terry O. Morse       | tt0059931        |
| 1746410877        | 1987        | 1987        | Three for the Road                       | Three for the Road                   | Norton, B. W. L.                | Bill Norton          | tt0094140        |
| 1746492859        | 1946        | 1946        | Vacation in Reno                         | Vacation in Reno                     | Goodwins, Leslie                | Leslie Goodwins      | tt0039075        |
| 1746495604        | 1920        | 1920        | You Never Can Tell                       | You Never Can Tell                   | Franklin, Chester M.            | Chester M. Franklin  | tt0011891        |
| 1746573306        | 1931        | 1931        | Many a Slip                              | Many a Sip                           | Moore, Vin                      | Mark Sandrich        | tt0830923        |
| 1746454915        | 1999        | 1998        | SLC Punk!                                | SLC Punk!                            | Merendino, James                | James Merendino      | tt0133189        |
| 1746454653        | 1946        | 1946        | So Goes My Love                          | So Goes My Love                      | Ryan, Frank                     | Frank Ryan           | tt0038959        |
| 1746454613        | 1942        | 1942        | Roxie Hart                               | Roxie Hart                           | Wellman, William A.             | William A. Wellman   | tt0035272        |
| 1746563888        | 1953        | 1953        | All Ashore                               | All Ashore                           | Quine, Richard                  | Richard Quine        | tt0045491        |
| 1746492425        | 1946        | 1945        | The Red Dragon                           | The Red Dragon                       | Rosen, Phil                     | Phil Rosen           | tt0038017        |
| 1745342033        | 2008        | 2008        | The Spirit                               | The Spirit                           | Miller, Frank                   | Frank Miller         | tt0831887        |
| 1746282289        | 1979        | 1979        | The North Avenue Irregulars              | The North Avenue Irregulars          | Bilson, Bruce                   | Bruce Bilson         | tt0079639        |
| 1746487169        | 1918        | 1918        | The Man Who Woke Up                      | The Man Who Woke Up                  | McLaughlin, J. W.               | James McLaughlin     | tt0009340        |
| 1746577310        | 1963        | 1963        | The Hook                                 | The Hook                             | Seaton, George                  | George Seaton        | tt0057152        |
| 1746585002        | 1939        | 1939        | Torchy Blane . . . Playing with Dynamite | Torchy Blane.. Playing with Dynamite | Smith, Noel                     | Noel M. Smith        | tt0032044        |
| 1746492485        | 1945        | 1945        | Strange Confession                       | Strange Confession                   | Hoffman, John                   | John Hoffman         | tt0038124        |
| 1746465259        | 1946        | 1946        | The Big Sleep                            | The Big Sleep                        | Hawks, Howard                   | Howard Hawks         | tt0038355        |
| 1746504187        | 1918        | 1918        | A Successful Adventure                   | A Successful Adventure               | Franklin, Harry L.              | Harry L. Franklin    | tt0009665        |
| 1746562469        | 1953        | 1953        | The Man from Cairo                       | The Man from Cairo                   | Enright, Ray H.                 | Ray Enright          | tt0045705        |
| 1746585057        | 1929        | 1929        | The Prince of Hearts                     | The Prince of Hearts                 | Wheeler, Cliff                  | Cliff Wheeler        | tt0020290        |
| 1746437140        | 1996        | 1996        | That Thing You Do                        | That Thing You Do!                   | Hanks, Tom                      | Tom Hanks            | tt0117887        |
| 1745372416        | 2002        | 2002        | Minority Report                          | Minority Report                      | Spielberg, Steven               | Steven Spielberg     | tt0181689        |
| 1746433932        | 1994        | 1994        | The Scout                                | The Scout                            | Ritchie, Michael                | Michael Ritchie      | tt0111094        |
| 1746500102        | 1924        | 1924        | The Mirage                               | The Mirage                           | Archainbaud, George             | George Archainbaud   | tt0015142        |
| 1746581911        | 1910        | 1910        | The Heart of Edna Leslie                 | The Heart of Edna Leslie             |                                 | Sidney Olcott        | tt0397450        |

|            |      |      |                                  |                                  |                                      |                                     |            |
|------------|------|------|----------------------------------|----------------------------------|--------------------------------------|-------------------------------------|------------|
| 1746509446 | 1926 | 1926 | Daniel Boone Thru the Wilderness | Daniel Boone Thru the Wilderness | Mattison, Frank S.; Bradbury, Robert | Robert N. Bradbury                  | tt0172295  |
| 1745359358 | 2002 | 2002 | Joshua                           | Joshua                           | Purdy, Jon                           | Jon Purdy                           | tt0271582  |
| 1746571458 | 1931 | 1931 | Rango                            | Rango                            |                                      | Ernest B. Schoedsack                | tt0173105  |
| 1746581787 | 1950 | 1950 | The Sleeping City                | The Sleeping City                | Sherman, George                      | George Sherman                      | tt0042976  |
| 1746579059 | 1960 | 1960 | The Lost World                   | The Lost World                   | Allen, Irwin                         | Irwin Allen                         | tt0054038  |
| 1746574646 | 1933 | 1933 | Love, Honor and Oh, Baby!        | Love, Honor and Oh, Baby!        | Buzzell, Eddie                       | Edward Buzzell                      | tt0024273  |
| 1746504569 | 1918 | 1918 | The Crime of the Hour            | The Crime of the Hour            | Ricketts, Thomas R.                  | Tom Ricketts                        | tt0184361  |
| 1746492122 | 1947 | 1947 | The Ghost and Mrs. Muir          | The Ghost and Mrs. Muir          | Mankiewicz, Joseph L.                | Joseph L. Mankiewicz                | tt0039420  |
| 1746500001 | 1948 | 1948 | Smart Woman                      | Smart Woman                      | Blatt, Edward A.                     | Edward A. Blatt                     | tt0040804  |
| 1746585451 | 1939 | 1939 | Women in the Wind                | Women in the Wind                | Farrow, John                         | John Farrow                         | tt0032142  |
| 1746438972 | 1943 | 1943 | She's for Me                     | She's for Me                     | LeBorg, Reginald                     | Reginald Le Borg                    | tt0036347  |
| 1746584742 | 1928 | 1928 | Glorious Betsy                   | Glorious Betsy                   | Crosland, Alan                       | Alan Crosland                       | tt0018945  |
| 1746580456 | 1936 | 1936 | A Son Comes Home                 | A Son Comes Home                 | Dupont, E. A.                        | Ewald André Dupont                  | tt0028278  |
| 1746571144 | 1934 | 1934 | Jane Eyre                        | Jane Eyre                        | Cabanne, Christy                     | Christy Cabanne                     | tt0025323  |
| 1746583998 | 1935 | 1935 | The Judgement Book               | The Judgement Book               | Hutchinson, Charles                  | Charles Hutchison                   | tt0026554  |
| 1746269703 | 1977 | 1977 | Short Eyes                       | Short Eyes                       | Young, Robert M.                     | Robert M. Young                     | tt0076706  |
| 1746566024 | 1956 | 1956 | A Woman's Devotion               | A Woman's Devotion               | Henreid, Paul                        | Paul Henreid                        | tt0049961  |
| 1746577733 | 1936 | 1936 | Make Way for a Lady              | Make Way for a Lady              | Burton, David                        | David Burton                        | tt0027932  |
| 1746580873 | 1935 | 1935 | Orchids to You                   | Orchids to You                   | Seiter, William A.                   | William A. Seiter                   | tt0026829  |
| 1746409117 | 1990 | 1990 | Nightbreed                       | Nightbreed                       | Barker, Clive                        | Clive Barker                        | tt0100260  |
| 1746574762 | 1935 | 1935 | Captain Blood                    | Captain Blood                    | Curtiz, Michael                      | Michael Curtiz                      | tt0026174  |
| 1746433731 | 1999 | 1999 | Liberty Heights                  | Liberty Heights                  | Levinson, Barry                      | Barry Levinson                      | tt0165859  |
| 1746508089 | 1925 | 1925 | Double Fisted                    | Double Fisted                    | Webb, Harry                          | Harry S. Webb                       | tt0298839  |
| 1746409522 | 1983 | 1983 | Cujo                             | Cujo                             | Teague, Lewis                        | Lewis Teague                        | tt0085382  |
| 1746487522 | 1918 | 1918 | Vengeance                        | Vengeance                        | Vale, Travers                        | Travers Vale                        | tt0009758  |
| 1746514639 | 1923 | 1923 | Soft Boiled                      | Soft Boiled                      | Blystone, J. G.                      | John G. Blystone                    | tt0014491  |
| 1746504592 | 1920 | 1920 | Harriet and the Piper            | Harriet and the Piper            | Bracken, Bertram                     | Bertram Bracken                     | tt0011261  |
| 1746578571 | 1960 | 1960 | The Leech Woman                  | The Leech Woman                  | Dein, Edward                         | Edward Dein                         | tt0054020  |
| 1769971960 | 1969 | 1969 | Roommates Sociable               | Roommates Sociable               | Glick, Wizard                        | Wizard Glick                        | tt3631438  |
| 1746562440 | 1957 | 1957 | Fury at Showdown                 | Fury at Showdown                 | Oswald, Gerd                         | Gerd Oswald                         | tt0050420  |
| 1746235477 | 1977 | 1977 | Telefon                          | Telefon                          | Siegel, Don                          | Don Siegel                          | tt0076804  |
| 1746509224 | 1949 | 1949 | Son of a Badman                  | Son of a Badman                  | Taylor, Ray                          | Ray Taylor                          | tt0041897  |
| 1746393352 | 1983 | 1983 | Breathless                       | Breathless                       | McBride, Jim                         | Jim McBride                         | tt0085276  |
| 1746507614 | 1923 | 1923 | In Search of a Thrill            | In Search of a Thrill            | Apfel, Oscar                         | Oscar Apfel                         | tt0014148  |
| 1746520412 | 1926 | 1926 | In Borrowed Plumes               | In Borrowed Plumes               | Halperin, Victor Hugo                | Victor Halperin                     | tt0016994  |
| 1746514841 | 1913 | 1913 | The Rogues of Paris              | The Rogues of Paris              | Blaché, Alice                        | Alice Guy                           | tt0003339  |
| 1746454087 | 1944 | 1944 | My Best Gal                      | My Best Gal                      | Mann, Anthony                        | Anthony Mann                        | tt0037107  |
| 1746501767 | 1915 | 1915 | The Unknown                      | The Unknown                      | Melford, George                      | George Melford                      | tt0006201  |
| 1746581822 | 1930 | 1930 | The Sea Wolf                     | The Sea Wolf                     | Santell, Alfred                      | Alfred Santell                      | tt0021348  |
| 1746501447 | 1910 | 1910 | The Range Riders                 | The Range Riders                 | Reynolds, Lynn                       | Francis Boggs                       | tt0001375  |
| 1746524784 | 1915 | 1915 | In the Shadow                    | In the Shadow                    | Handworth, Harry                     | Harry Handworth                     | tt0005543  |
| 1746571716 | 1931 | 1931 | The Phantom                      | The Phantom                      | Neitz, Alvin J.                      | Alan James                          | tt0022265  |
| 1746513028 | 1916 | 1916 | Spellbound                       | Spellbound                       | Harvey, Harry                        | Harry Harvey                        | tt0158986  |
| 1746500661 | 1926 | 1926 | Transcontinental Limited         | Transcontinental Limited         | Ross, Nat                            | Nat Ross                            | tt0173352  |
| 1746419151 | 1989 | 1989 | The Big Picture                  | The Big Picture                  | Guest, Christopher                   | Christopher Guest                   | tt0096926  |
| 1746555613 | 1955 | 1955 | Wichita                          | Wichita                          | Tourneur, Jacques                    | Jacques Tourneur                    | tt0048806  |
| 1746182960 | 1910 | 1910 | The Bad Man's Christmas Gift     | The Bad Man's Christmas Gift     |                                      | Gilbert M. 'Broncho Billy' Anderson | tt0001124  |
| 1746574117 | 1958 | 1958 | Voice in the Mirror              | Voice in the Mirror              | Keller, Harry                        | Harry Keller                        | tt0052373  |
| 1746581237 | 1961 | 1961 | The Boy Who Caught a Crook       | Boy Who Caught a Crook           | Cahn, Edward L.                      | Edward L. Cahn                      | tt0054695  |
| 1746513687 | 1916 | 1916 | The Rack                         | Jack                             | Chautard, Emile                      | Frank Borzage                       | tt00484620 |
| 1746583130 | 1934 | 1934 | Chloe Love Is Calling You        | Chloe, Love Is Calling You       | Neilan, Marshall                     | Marshall Neilan                     | tt0026209  |
| 1746410855 | 1987 | 1987 | Radio Days                       | Radio Days                       | Allen, Woody                         | Woody Allen                         | tt0093818  |
| 1746464903 | 1940 | 1940 | Texas Rangers Ride Again         | Texas Rangers Ride Again         | Hogan, James                         | James P. Hogan                      | tt0033140  |
| 1746523079 | 1910 | 1910 | The Sheriff's Capture            | The Sheriff's Capture            |                                      |                                     | tt1822339  |
| 1769970680 | 1968 | 1967 | Whip's Women                     | Whip's Women                     | Denby, Jerry                         | Jerry Denby                         | tt0260560  |
| 1746582666 | 1935 | 1935 | Romance in Manhattan             | Romance in Manhattan             | Roberts, Stephen                     | Stephen Roberts                     | tt0025731  |
| 1746523853 | 1915 | 1915 | The Commanding Officer           | The Commanding Officer           | Dwan, Allan                          | Allan Dwan                          | tt0005126  |

|            |      |      |                            |                            |                                     |                        |           |
|------------|------|------|----------------------------|----------------------------|-------------------------------------|------------------------|-----------|
| 1746249766 | 1980 | 1980 | Fade to Black              | Fade to Black              | Zimmerman, Vernon                   | Vernon Zimmerman       | tt0080711 |
| 1746568150 | 1933 | 1933 | Hot Pepper                 | Hot Pepper                 | Blystone, John                      | John G. Blystone       | tt0024141 |
| 1746408700 | 1989 | 1989 | Best of the Best           | Best of the Best           | Radler, Bob                         | Robert Radler          | tt0096913 |
| 1746515810 | 1921 | 1921 | Two Weeks With Pay         | Two Weeks with Pay         | Campbell, Maurice                   | Maurice Campbell       | tt0012786 |
| 1746574652 | 1936 | 1936 | Rogue of the Range         | Rogue of the Range         | Luby, S. Roy                        | S. Roy Luby            | tt0028199 |
| 1746455817 | 1996 | 1996 | Hype!                      | Hype!                      | Pray, Doug                          | Doug Pray              | tt0116589 |
| 1746182345 | 1910 | 1910 | An Arcadian Maid           | An Arcadian Maid           | Griffith, D. W.                     | D.W. Griffith          | tt0001118 |
| 1746584741 | 1929 | 1929 | The Last Performance       | The Last Performance       | Fejos, Paul                         | Pál Fejős              | tt0020078 |
| 1746573805 | 1962 | 1962 | It's Only Money            | It's Only Money            | Tashlin, Frank                      | Frank Tashlin          | tt0056110 |
| 1746570105 | 1934 | 1934 | The Lost Patrol            | The Lost Patrol            | Ford, John                          | John Ford              | tt0025423 |
| 1746436655 | 1942 | 1942 | Road to Morocco            | Road to Morocco            | Butler, David                       | David Butler           | tt0035262 |
| 1746532854 | 1916 | 1916 | The Dupe                   | The Dupe                   | Reicher, Frank                      | William Worthington    | tt0325292 |
| 1746574819 | 1934 | 1934 | Beyond Bengal              | Beyond Bengal              | Schenck, Harry                      | Harry Schenck          | tt0126214 |
| 1746554901 | 1954 | 1954 | Dragonfly Squadron         | Dragonfly Squadron         | Selander, Lesley                    | Lesley Selander        | tt0045704 |
| 1745374725 | 2002 | 2002 | Swimfan                    | Swimfan                    | Polson, John                        | John Polson            | tt0283026 |
| 1769970739 | 1912 | 1912 | The Cry of the Children    | The Cry of the Children    |                                     | George Nichols         | tt0002122 |
| 1746520527 | 1925 | 1925 | The Wild Girl              | The Wild Girl              | Bletcher, William                   | Billy Bletcher         | tt0016531 |
| 1746512742 | 1923 | 1923 | Adam's Rib                 | Adam's Rib                 | De Mille, Cecil B.                  | Cecil B. DeMille       | tt0013817 |
| 1746198032 | 1969 | 1969 | The Last of the Ski Bums   | The Last of the Ski Bums   | Barrymore, Dick                     | Dick Barrymore         | tt0064575 |
| 1746581188 | 1951 | 1951 | On Moonlight Bay           | On Moonlight Bay           | Del Ruth, Roy                       | Roy Del Ruth           | tt0043880 |
| 1746580823 | 1937 | 1937 | Two-Gun Law                | Two Gun Law                | Barsha, Leon                        | Leon Barsha            | tt0134168 |
| 1746582150 | 1928 | 1928 | Where the West Begins      | Where the West Begins      | Horner, Robert J.; De La Mothe, Leo | Robert J. Horner       | tt0178987 |
| 1746256279 | 1977 | 1977 | Sorcerer                   | Sorcerer                   | Friedkin, William                   | William Friedkin       | tt0076740 |
| 1746580493 | 1937 | 1937 | The Great Gambini          | The Great Gambini          | Vidor, Charles                      | Charles Vidor          | tt0028952 |
| 1745357741 | 2009 | 2009 | Not Easily Broken          | Not Easily Broken          | Duke, Bill                          | Bill Duke              | tt0795438 |
| 1746217992 | 1967 | 1967 | I, a Man                   | I, a Man                   | Warhol, Andy                        | Paul Morrissey         | tt0220569 |
| 1746583113 | 1936 | 1936 | Silks and Saddles          | Silks and Saddles          | Hill, Bob                           | Robert F. Hill         | tt0029563 |
| 1746580583 | 1938 | 1938 | Little Miss Thoroughbred   | Little Miss Thoroughbred   | Farrow, John                        | John Farrow            | tt0030374 |
| 1746208586 | 1969 | 1969 | Out of It                  | Out of It                  | Williams, Paul                      | Paul Williams          | tt0063401 |
| 1746573971 | 1958 | 1958 | Run Silent Run Deep        | Run Silent Run Deep        | Wise, Robert                        | Robert Wise            | tt0052151 |
| 1746574337 | 1951 | 1951 | I Want You                 | I Want You                 | Robson, Mark                        | Mark Robson            | tt0043664 |
| 1746474978 | 1948 | 1948 | Hills of Home              | Hills of Home              | Wilcox, Fred M.                     | Fred M. Wilcox         | tt0040438 |
| 1745272617 | 2000 | 2000 | What Women Want            | What Women Want            | Meyers, Nancy                       | Nancy Meyers           | tt0207201 |
| 1746393055 | 1982 | 1982 | Grease 2                   | Grease 2                   | Birch, Patricia                     | Patricia Birch         | tt0084021 |
| 1746186319 | 1966 | 1966 | The Singing Nun            | The Singing Nun            | Koster, Henry                       | Henry Koster           | tt0060983 |
| 1745340012 | 2001 | 2000 | The Debut                  | The Debut                  | Cajayon, Gene                       | Gene Cajayon           | tt0163745 |
| 1746578943 | 1961 | 1961 | Homicidal                  | Homicidal                  | Castle, William                     | William Castle         | tt0054988 |
| 1746438472 | 1943 | 1943 | Border Buckaroos           | Border Buckaroos           | Drake, Oliver                       | Oliver Drake           | tt0035691 |
| 1746185842 | 1969 | 1969 | House of a Thousand Dreams | House of a Thousand Dreams |                                     |                        | tt0437235 |
| 1746185860 | 1968 | 1968 | The Filthy Five            | The Filthy Five            | Milligan, Andy                      | Andy Milligan          | tt0062972 |
| 1746585077 | 1928 | 1928 | Ramona                     | Ramona                     | Carewe, Edwin                       | Edwin Carewe           | tt0019305 |
| 1746234990 | 1966 | 1966 | This Property Is Condemned | This Property Is Condemned | Pollack, Sydney                     | Sydney Pollack         | tt0061089 |
| 1769970798 | 1911 | 1911 | Lorna Doone                | Lorna Doone                |                                     | Theodore Marston       | tt0410262 |
| 1746197865 | 1967 | 1967 | Eros, o Basileus           | Eros, O Basileus           | Markopoulos, Gregory J.             | Gregory J. Markopoulos | tt0195686 |
| 1746485927 | 1920 | 1920 | The Yellow Typhoon         | The Yellow Typhoon         | José, Edward                        | Edward José            | tt0011889 |
| 1746216744 | 1968 | 1968 | The Wicked Die Slow        | The Wicked Die Slow        | Hennigar, William K.                | William K. Hennigar    | tt0261408 |
| 1746501684 | 1916 | 1916 | The Smugglers              | The Smugglers              | Olcott, Sidney                      | Sidney Olcott          | tt0007360 |
| 1746454597 | 1999 | 1998 | Free Enterprise            | Free Enterprise            | Meyer Burnett, Robert               | Robert Meyer Burnett   | tt0141105 |
| 1746437930 | 1943 | 1943 | Let's Have Fun             | Let's Have Fun             | Barton, Charles                     | Charles Barton         | tt0183399 |
| 1746576608 | 1932 | 1932 | 45 Calibre Echo            | 45 Calibre Echo            | Mitchell, Bruce                     | Bruce Mitchell         | tt0193957 |
| 1746501154 | 1916 | 1916 | The Hero of Submarine D-2  | The Hero of Submarine D 2  | Scardon, Paul                       | Paul Scardon           | tt0157751 |
| 1746502676 | 1922 | 1922 | Human Hearts               | Human Hearts               | Baggot, King                        | King Baggot            | tt0013253 |
| 1746497683 | 1917 | 1917 | Snap Judgement             | Snap Judgment              | Sloman, Edward                      | Edward Sloman          | tt0008595 |
| 1746584034 | 1937 | 1937 | The Toast of New York      | The Toast of New York      | Lee, Rowland V.; Hall, Alexander    | Rowland V. Lee         | tt0029675 |
| 1746583341 | 1930 | 1930 | The Florodora Girl         | The Florodora Girl         | Beaumont, Harry                     | Harry Beaumont         | tt0020891 |
| 1746577877 | 1935 | 1934 | The Rawhide Terror         | The Rawhide Terror         | Nelson, Jack; Mitchell, Bruce       | Bruce Mitchell         | tt0173114 |
| 1746574249 | 1960 | 1960 | The Facts of Life          | The Facts of Life          | Frank, Melvin                       | Melvin Frank           | tt0053810 |



|                   |             |             |                             |                             |                          |                                     |                  |
|-------------------|-------------|-------------|-----------------------------|-----------------------------|--------------------------|-------------------------------------|------------------|
| 1746585212        | 1928        | 1928        | The Chaser                  | The Chaser                  | Langdon, Harry           | Harry Langdon                       | tt0018761        |
| 1746574027        | 1960        | 1960        | Studs Lonigan               | Studs Lonigan               | Lerner, Irving           | Irving Lerner                       | tt0054348        |
| 1746542699        | 1925        | 1925        | Red Love                    | Red Love                    | Lewis, Edgar             | Edgar Lewis                         | tt0016277        |
| 1746516543        | 1920        | 1920        | Headin' Home                | Headin' Home                | Windom, Lawrence         | Lawrence C. Windom                  | tt0011267        |
| 1746578644        | 1962        | 1961        | Reptilicus                  | Reptilicus                  | Pink, Sidney; Bang, Poul | Sidney W. Pink                      | tt0056405        |
| 1746578439        | 1963        | 1963        | Nature's Sweethearts        | Nature's Sweethearts        | Wolk, Larry              | Larry Wolk                          | tt0200894        |
| 1746511823        | 1923        | 1923        | Dead Game                   | Dead Game                   | Sedgwick, Edward         | Edward Sedgwick                     | tt0013979        |
| 1746513821        | 1915        | 1915        | Right Off the Bat           | Right Off the Bat           | Reticker, Hugh           | Hugh Reticker                       | tt0005967        |
| 1746234257        | 1968        | 1968        | Pretty Poison               | Pretty Poison               | Black, Noel              | Noel Black                          | tt0063456        |
| 1746437332        | 1940        | 1940        | The Boys from Syracuse      | The Boys from Syracuse      | Sutherland, A. Edward    | A. Edward Sutherland                | tt0032276        |
| 1746497895        | 1921        | 1921        | Bob Hampton of Placer       | Bob Hampton of Placer       | Neilan, Marshall         | Marshall Neilan                     | tt0011985        |
| 1746570167        | 1934        | 1934        | Cross Streets               | Cross Streets               | Strayer, Frank R.        | Frank R. Strayer                    | tt0025016        |
| 1746453757        | 1943        | 1943        | What's Buzzin' Cousin?      | What's Buzzin', Cousin?     | Barton, Charles          | Charles Barton                      | tt0036528        |
| 1746454808        | 1941        | 1941        | Power Dive                  | Power Dive                  | Hogan, James             | James P. Hogan                      | tt0034056        |
| 1746570420        | 1952        | 1952        | The Turning Point           | The Turning Point           | Dieterle, William        | William Dieterle                    | tt0045267        |
| 1745341787        | 2010        | 2009        | Don McKay                   | Don McKay                   | Goldberger, Jake         | Jake Goldberger                     | tt1281374        |
| 1746211227        | 1974        | 1974        | The Longest Yard            | The Longest Yard            | Aldrich, Robert          | Robert Aldrich                      | tt0071771        |
| 1746272118        | 1967        | 1967        | Bike Boy                    | Bike Boy                    | Warhol, Andy             | Andy Warhol                         | tt0061403        |
| 1746508477        | 1949        | 1948        | The Valiant Hombre          | The Valiant Hombre          | Fox, Wallace             | Wallace Fox                         | tt0040929        |
| 1746520170        | 1926        | 1926        | The Canadian                | The Canadian                | Beaudine, William        | William Beaudine                    | tt0016706        |
| 1746523356        | 1910        | 1910        | A Ranchman's Wooing         | A Ranchman's Wooing         |                          | Gilbert M. 'Broncho Billy' Anderson | tt0372485        |
| 1746585481        | 1940        | 1940        | While Thousands Cheer       | While Thousands Cheer       | Popkin, Leo C.           | Leo C. Popkin                       | tt0033255        |
| 1746409066        | 1990        | 1990        | The Bonfire of the Vanities | The Bonfire of the Vanities | De Palma, Brian          | Brian De Palma                      | tt0099165        |
| 1746423529        | 1940        | 1940        | One Crowded Night           | One Crowded Night           | Reis, Irving             | Irving Reis                         | tt0032869        |
| 1746495978        | 1920        | 1920        | Duds                        | Suds                        | Mills, Thomas R.         | John Francis Dillon                 | tt0011741        |
| 1746454688        | 1941        | 1941        | Look Who's Laughing         | Look Who's Laughing         | Dwan, Allan              | Allan Dwan                          | tt0033850        |
| 1746573743        | 1961        | 1961        | Mr. Sardonicus              | Mr. Sardonicus              | Castle, William          | William Castle                      | tt0055200        |
| 1746420865        | 1998        | 1998        | Apt Pupil                   | Apt Pupil                   | Singer, Bryan            | Bryan Singer                        | tt0118636        |
| 1746570127        | 1933        | 1933        | Horseplay                   | Horse Play                  | Sedgwick, Edward         | Edward Sedgwick                     | tt0024140        |
| 1746423314        | 1990        | 1990        | Disturbed                   | Disturbed                   | Winkler, Charles         | Charles Winkler                     | tt0099441        |
| 1746583883        | 1929        | 1929        | Coquette                    | Coquette                    | Taylor, Sam              | Sam Taylor                          | tt0019788        |
| 1746574130        | 1961        | 1961        | The Sergeant Was a Lady     | The Sergeant Was a Lady     | Glasser, Bernard         | Bernard Glasser                     | tt0055434        |
| 1746454819        | 1945        | 1945        | Bandits of the Badland      | Bandits of the Badlands     | Carr, Thomas             | Thomas Carr                         | tt0037525        |
| 1746530674        | 1949        | 1949        | I Shot Jesse James          | I Shot Jesse James          | Fuller, Samuel           | Samuel Fuller                       | tt0041497        |
| <b>1746474946</b> | <b>1947</b> | <b>1947</b> | <b>Calendar Girl</b>        | <b>Calendar Girl</b>        | <b>Dwan, Allan</b>       | <b>Allan Dwan</b>                   | <b>tt0039236</b> |
| 1746436931        | 1995        | 1995        | Jumanji                     | Jumanji                     | Johnston, Joe            | Joe Johnston                        | tt0113497        |
| 1746497880        | 1917        | 1917        | Barnaby Lee                 | Barnaby Lee                 | Griffith, Edward H.      | Edward H. Griffith                  | tt0176511        |
| 1746565900        | 1954        | 1954        | City Story                  | City Story                  | Beaudine, William        | William Beaudine                    | tt0180605        |
| 1746474528        | 1946        | 1946        | Heldorado                   | Heldorado                   | Witney, William          | William Witney                      | tt0038593        |
| 1746578850        | 1959        | 1959        | Holiday for Lovers          | Holiday for Lovers          | Levin, Henry             | Henry Levin                         | tt0052897        |
| 1746583730        | 1930        | 1930        | The Devil's Holiday         | The Devil's Holiday         | Goulding, Edmund         | Edmund Goulding                     | tt0020823        |
| 1746576724        | 1931        | 1931        | Soul of the Slums           | Soul of the Slums           | Strayer, Frank           | Frank R. Strayer                    | tt0022416        |
| 1746583448        | 1929        | 1929        | The Jazz Age                | The Jazz Age                | Shores, Lynn             | Lynn Shores                         | tt0020040        |
| 1746422214        | 1989        | 1989        | True Love                   | True Love                   | Savoca, Nancy            | Nancy Savoca                        | tt0098528        |
| 1746520611        | 1949        | 1949        | Bad Men of Tombstone        | Bad Men of Tombstone        | Neumann, Kurt            | Kurt Neumann                        | tt0041147        |
| 1746569647        | 1953        | 1953        | Son of the Renegade         | Son of the Renegade         | Browne, Reg              | Reg Browne                          | tt0046347        |
| 1746475937        | 1946        | 1946        | The Dark Corner             | The Dark Corner             | Hathaway, Henry          | Henry Hathaway                      | tt0038453        |
| 1769976727        | 1929        | 1929        | Music Hath Harms            | Music Hath Charms           | Graham, Walter           | Murray Roth                         | tt0020191        |
| 1746523369        | 1915        | 1915        | Motherhood                  | Motherhood                  | Carleton, Lloyd B.       | Lloyd B. Carleton                   | tt1261915        |
| 1746584170        | 1936        | 1936        | Wild Horse Round-Up         | Wild Horse Round Up         | James, Alan              | Alan James                          | tt0134216        |
| 1746581036        | 1960        | 1960        | Oklahoma Territory          | Oklahoma Territory          | Cahn, Edward L.          | Edward L. Cahn                      | tt0054138        |
| 1746579023        | 1958        | 1958        | Thunder Road                | Thunder Road                | Ripley, Arthur           | Arthur Ripley                       | tt0052293        |
| 1746495618        | 1917        | 1917        | Money Madness               | Money Madness               | McRae, Henry             | Henry MacRae                        | tt0008312        |
| 1746570385        | 1934        | 1934        | Tarzan and His Mate         | Tarzan and His Mate         | Gibbons, Cedric          | Cedric Gibbons                      | tt0025862        |
| <b>1746524676</b> | <b>1917</b> | <b>1917</b> | <b>American Maid</b>        | <b>American Maid</b>        | <b>Capellani, Albert</b> | <b>Albert Capellani</b>             | <b>tt0166970</b> |
| 1746554728        | 1964        | 1964        | Paris When It Sizzles       | Paris When It Sizzles       | Quine, Richard           | Richard Quine                       | tt0058453        |
| 1769975268        | 1916        | 1916        | The Wonderful Wager         | The Wonderful Wager         | Plaissetty, Rene         | René Plaissetty                     | tt0438644        |

|            |      |      |                                    |                                     |                                     |                          |           |
|------------|------|------|------------------------------------|-------------------------------------|-------------------------------------|--------------------------|-----------|
| 1746199537 | 1967 | 1967 | Run Like a Thief                   | Run Like a Thief                    | Glasser, Bernard                    | Bernard Glasser          | tt0062208 |
| 1746454630 | 1946 | 1946 | Home in Oklahoma                   | Home in Oklahoma                    | Witney, William                     | William Witney           | tt0038611 |
| 1746211215 | 1974 | 1974 | Big Bad Mama                       | Big Bad Mama                        | Carver, Steve                       | Steve Carver             | tt0071216 |
| 1746585229 | 1928 | 1928 | The Cavalier                       | The Cavalier                        | Willat, Irvin                       | Irvin Willat             | tt0018752 |
| 1746210480 | 1971 | 1971 | Billy Jack                         | Billy Jack                          | Frank, T. C.                        | Tom Laughlin             | tt0066832 |
| 1746520623 | 1926 | 1926 | Baited Trap                        | The Baited Trap                     | Paton, Stuart                       | Stuart Paton             | tt0016619 |
| 1746500639 | 1926 | 1926 | Subway Sadie                       | Subway Sadie                        | Santell, Alfred                     | Alfred Santell           | tt0017439 |
| 1746421284 | 1994 | 1994 | The Crow                           | The Crow                            | Proyas, Alex                        | Alex Proyas              | tt0109506 |
| 1745395698 | 2008 | 2007 | Hollywood Chinese                  | Hollywood Chinese                   | Dong, Arthur                        | Arthur Dong              | tt1052005 |
| 1746520162 | 1924 | 1924 | Tongues of Flame                   | Tongues of Flame                    | Henabery, Joseph                    | Joseph Henabery          | tt0016437 |
| 1746454092 | 1944 | 1944 | The San Antonio Kid                | The San Antonio Kid                 | Bretherton, Howard                  | Howard Bretherton        | tt0037243 |
| 1745302798 | 2006 | 2006 | Kettle of Fish                     | Kettle of Fish                      | Myers, Claudia                      | Claudia Myers            | tt0473500 |
| 1746583388 | 1928 | 1928 | Women Who Dare                     | Women Who Dare                      | King, Burton                        | Burton L. King           | tt0019595 |
| 1746577436 | 1961 | 1961 | Misty                              | Misty                               | Clark, James B.                     | James B. Clark           | tt0055186 |
| 1746410740 | 1992 | 1992 | The Bodyguard                      | The Bodyguard                       | Jackson, Mick                       | Mick Jackson             | tt0103855 |
| 1746577316 | 1951 | 1951 | Rawhide                            | Rawhide                             | Hathaway, Henry                     | Henry Hathaway           | tt0043959 |
| 1746520819 | 1925 | 1925 | Durand of the Bad Lands            | Durand of the Bad Lands             | Reynolds, Lynn                      | Lynn Reynolds            | tt0015770 |
| 1746520345 | 1924 | 1924 | Discontented Husbands              | Discontented Husbands               | Le Saint, Edward J.                 | Edward LeSaint           | tt0014849 |
| 1746410593 | 1991 | 1991 | Naked Gun 2 1/2: The Smell of Fear | The Naked Gun 2½: The Smell of Fear | Zucker, David                       | David Zucker             | tt0102510 |
| 1746584364 | 1937 | 1937 | Jim Hanvey, Detective              | Jim Hanvey, Detective               | Rosen, Phil                         | Phil Rosen               | tt0029066 |
| 1746434263 | 1992 | 1992 | Under Siege                        | Under Siege                         | Davis, Andrew                       | Andrew Davis             | tt0105690 |
| 1746393062 | 1981 | 1981 | They All Laughed                   | They All Laughed                    | Bogdanovich, Peter                  | Peter Bogdanovich        | tt0083189 |
| 1746514604 | 1915 | 1915 | Esmeralda                          | Esmeralda                           | Kirkwood, James                     | James Kirkwood           | tt0005249 |
| 1746465303 | 1944 | 1944 | An American Romance                | An American Romance                 | Vidor, King                         | King Vidor               | tt0036596 |
| 1745303121 | 2005 | 2004 | Double Dare                        | Double Dare                         | Micheli, Amanda                     | Amanda Micheli           | tt0365135 |
| 1746580461 | 1936 | 1936 | The Drag-Net                       | The Drag Net                        | Moore, Vin                          | Vin Moore                | tt0027546 |
| 1746583027 | 1936 | 1936 | San Francisco                      | San Francisco                       | Van Dyke, W. S.                     | W.S. Van Dyke            | tt0028216 |
| 1746574949 | 1937 | 1937 | Stolen Holiday                     | Stolen Holiday                      | Curtiz, Michael                     | Michael Curtiz           | tt0028310 |
| 1746578896 | 1950 | 1950 | My Friend Irma Goes West           | My Friend Irma Goes West            | Walker, Hal                         | Hal Walker               | tt0042769 |
| 1746235225 | 1971 | 1971 | Sometimes a Great Notion           | Sometimes a Great Notion            | Newman, Paul; Colla, Richard A.     | Paul Newman              | tt0067774 |
| 1746508132 | 1950 | 1950 | The Golden Gloves Story            | The Golden Gloves Story             | Feist, Felix                        | Felix E. Feist           | tt0042511 |
| 1746580561 | 1938 | 1938 | Hawaii Calls                       | Hawaii Calls                        | Cline, Edward F.                    | Edward F. Cline          | tt0030217 |
| 1746256661 | 1979 | 1979 | The Onion Field                    | The Onion Field                     | Becker, Harold                      | Harold Becker            | tt0079668 |
| 1746218755 | 1973 | 1973 | Beyond Atlantis                    | Beyond Atlantis                     | Romero, Eddie                       | Eddie Romero             | tt0069783 |
| 1746582176 | 1930 | 1930 | The Gorilla                        | The Gorilla                         | Foy, Bryan                          | Bryan Foy                | tt0021923 |
| 1746474123 | 1948 | 1948 | Appointment with Murder            | Appointment with Murder             | Bernhard, Jack                      | Jack Bernhard            | tt0040106 |
| 1746566089 | 1953 | 1953 | Prince of Pirates                  | Prince of Pirates                   | Salkow, Sidney                      | Sidney Salkow            | tt0046208 |
| 1746211096 | 1971 | 1971 | The Last Movie                     | The Last Movie                      | Hopper, Dennis                      | Dennis Hopper            | tt0067327 |
| 1746581446 | 1910 | 1910 | The Italian Sherlock Holmes        | The Italian Sherlock Holmes         |                                     |                          | tt2288238 |
| 1746487024 | 1918 | 1918 | Love Me                            | Love Me                             | Neill, R. William                   | Roy William Neill        | tt0009319 |
| 1746568275 | 1933 | 1933 | The Devil's Brother                | The Devil's Brother                 | Roach, Hal                          | Hal Roach                | tt0023943 |
| 1745282609 | 2007 | 2007 | Vacancy                            | Vacancy                             | Antal, Nimród                       | Nimród Antal             | tt0452702 |
| 1746574943 | 1937 | 1936 | Shadow of Chinatown                | Shadow of Chinatown                 | Hill, Robert S.                     | Robert F. Hill           | tt0126659 |
| 1746567084 | 1933 | 1933 | Dance Hall Hostess                 | Dance Hall Hostess                  | Eason, Breezy                       | B. Reeves Eason          | tt0023924 |
| 1746507800 | 1926 | 1926 | Without Orders                     | Without Orders                      | Maloney, Leo                        | Leo D. Maloney           | tt0017570 |
| 1746475292 | 1948 | 1948 | The Countess of Monte Cristo       | The Countess of Monte Cristo        | De Cordova, Frederick; Stone, Andre | Frederick De Cordova     | tt0040251 |
| 1746512617 | 1928 | 1928 | Jazz Mad                           | Jazz Mad                            | Weight, F. Harmon                   | F. Harmon Weight         | tt0019041 |
| 1746410404 | 1983 | 1983 | The Survivors                      | The Survivors                       | Ritchie, Michael                    | Michael Ritchie          | tt0086397 |
| 1746423269 | 1998 | 1998 | Woo                                | Woo                                 | Mayer, Daisy von Scherler           | Daisy von Scherler Mayer | tt0120531 |
| 1746423295 | 1994 | 1994 | Corrina, Corrina                   | Corrina, Corrina                    | Nelson, Jessie                      | Jessie Nelson            | tt0109484 |
| 1746577172 | 1963 | 1963 | "X"--The Man With the X-Ray Eyes   | X: The Man with the X Ray Eyes      | Corman, Roger                       | Roger Corman             | tt0057693 |
| 1746511751 | 1928 | 1928 | Marry the Girl                     | Marry the Girl                      | Rosen, Philip                       | Phil Rosen               | tt0019148 |
| 1746515406 | 1917 | 1917 | Salt of the Earth                  | Salt of the Earth                   | Harrison, Saul                      | Saul Harrison            | tt0127266 |
| 1746512423 | 1923 | 1923 | Alias the Night Wind               | Alias the Night Wind                | Franz, Joseph                       | Joseph Franz             | tt0013821 |
| 1746465230 | 1946 | 1946 | Sun Valley Cyclone                 | Sun Valley Cyclone                  | Springsteen, R. G.                  | R.G. Springsteen         | tt0038995 |
| 1746520761 | 1925 | 1925 | The Unguarded Hour                 | The Unguarded Hour                  | Hillyer, Lambert                    | Lambert Hillyer          | tt0016472 |
| 1746583322 | 1951 | 1951 | Pardon My French                   | Pardon My French                    | Vorhaus, Bernard                    | Bernard Vorhaus          | tt0043901 |

|            |      |      |                                        |                                        |                      |                     |           |
|------------|------|------|----------------------------------------|----------------------------------------|----------------------|---------------------|-----------|
| 1746500417 | 1925 | 1925 | Dangerous Fists                        | Dangerous Fists                        | Webb, Harry S.       | Harry S. Webb       | tt0246549 |
| 1745374117 | 2003 | 2003 | A Mighty Wind                          | A Mighty Wind                          | Guest, Christopher   | Christopher Guest   | tt0310281 |
| 1746578993 | 1959 | 1959 | The Naked Venus                        | The Naked Venus                        | Sehested, Ove H.     | Edgar G. Ulmer      | tt0144415 |
| 1746234266 | 1967 | 1967 | The Further Perils of Laurel and Hardy | The Further Perils of Laurel and Hardy |                      | Robert Youngson     | tt0061692 |
| 1746216667 | 1969 | 1969 | Me, Natalie                            | Me, Natalie                            | Coe, Fred            | Fred Coe            | tt0064651 |
| 1746454005 | 1999 | 1999 | The Story of Us                        | The Story of Us                        | Reiner, Rob          | Rob Reiner          | tt0160916 |
| 1746574667 | 1938 | 1938 | Where the West Begins                  | Where the West Begins                  | McGowan, J. P.       | J.P. McGowan        | tt0030970 |
| 1746574705 | 1933 | 1933 | Reunion in Vienna                      | Reunion in Vienna                      | Franklin, Sidney     | Sidney Franklin     | tt0024496 |
| 1746475777 | 1948 | 1948 | Rusty Leads the Way                    | Rusty Leads the Way                    | Jason, Will          | Will Jason          | tt0040750 |
| 1746574866 | 1936 | 1936 | Colleen                                | Colleen                                | Green, Alfred E.     | Alfred E. Green     | tt0027455 |
| 1746566320 | 1954 | 1953 | Crazylegs                              | Crazylegs                              | Lyon, Francis D.     | Francis D. Lyon     | tt0045656 |
| 1745272698 | 2001 | 2001 | Baby Boy                               | Baby Boy                               | Singleton, John      | John Singleton      | tt0255819 |
| 1746423476 | 1996 | 1996 | American Strays                        | American Strays                        | Covert, Michael      | Michael Covert      | tt0115531 |
| 1746453789 | 1943 | 1943 | Du Barry Was a Lady                    | Du Barry Was a Lady                    | Del Ruth, Roy        | Roy Del Ruth        | tt0035829 |
| 1746585003 | 1939 | 1939 | The Llano Kid                          | The Llano Kid                          | Venturini, Edward D. | Edward D. Venturini | tt0031581 |
| 1746439479 | 1943 | 1943 | Pistol Packin' Mama                    | Pistol Packin' Mama                    | Woodruff, Frank      | Frank Woodruff      | tt0036266 |
| 1746500508 | 1926 | 1926 | Sweet Daddies                          | Sweet Daddies                          | Santell, Alfred      | Alfred Santell      | tt0017444 |
| 1746503031 | 1910 | 1910 | The Winter's Tale                      | The Winter's Tale                      |                      | Theodore Marston    | tt0131137 |
| 1746582633 | 1935 | 1935 | Saddle Aces                            | Saddle Aces                            | Fraser, Harry        | Harry L. Fraser     | tt0028213 |
| 1746502421 | 1915 | 1915 | Fighting Bob                           | Fighting Bob                           | Noble, John W.       | John W. Noble       | tt0128211 |
| 1746500330 | 1950 | 1950 | The Capture                            | The Capture                            | Sturges, John        | John Sturges        | tt0042313 |
| 1746570244 | 1953 | 1952 | The Bad and the Beautiful              | The Bad and the Beautiful              | Minnelli, Vincente   | Vincente Minnelli   | tt0044391 |
| 1746392883 | 1981 | 1981 | The Hand                               | The Hand                               | Stone, Oliver        | Oliver Stone        | tt0082497 |
| 1746409449 | 1987 | 1987 | The Running Man                        | The Running Man                        | Glaser, Paul Michael | Paul Michael Glaser | tt0093894 |
| 1745342793 | 2003 | 2003 | Tupac: Resurrection                    | Tupac: Resurrection                    | Lazin, Lauren        | Lauren Lazin        | tt0343121 |
| 1746584393 | 1939 | 1939 | The Girl and the Gambler               | The Girl and the Gambler               | Landers, Lew         | Lew Landers         | tt0031369 |
| 1746496331 | 1919 | 1919 | Who Will Marry Me?                     | Who Will Marry Me?                     | Powell, Paul         | Paul Powell         | tt0010884 |
| 1746436545 | 1943 | 1943 | Marching On!                           | Marching On!                           | Williams, Spencer    | Spencer Williams    | tt0135539 |
| 1746393955 | 1986 | 1986 | Club Paradise                          | Club Paradise                          | Ramis, Harold        | Harold Ramis        | tt0090856 |
| 1746584064 | 1936 | 1935 | The Human Adventure                    | The Human Adventure                    | Breasted, Charles    | Charles Breasted    | tt0026498 |
| 1746581396 | 1951 | 1951 | Reunion in Reno                        | Reunion in Reno                        | Neumann, Kurt        | Kurt Neumann        | tt0043965 |
| 1746492586 | 1943 | 1943 | Submarine Base                         | Submarine Base                         | Kelley, Albert       | Albert H. Kelley    | tt0036398 |
| 1746509463 | 1925 | 1925 | North Star                             | North Star                             | Powell, Paul         | Paul Powell         | tt0017212 |
| 1746512172 | 1923 | 1923 | The Extra Girl                         | The Extra Girl                         | Jones, F. Richard    | F. Richard Jones    | tt0014029 |
| 1746422256 | 1995 | 1995 | Tom and Huck                           | Tom and Huck                           | Hewitt, Peter        | Peter Hewitt        | tt0112302 |
| 1746580808 | 1935 | 1935 | The Case of the Missing Man            | Case of the Missing Man                | Lederman, D. Ross    | D. Ross Lederman    | tt0026186 |
| 1746485171 | 1919 | 1919 | The Hushed Hour                        | The Hushed Hour                        | Mortimer, Edmund     | Edmund Mortimer     | tt0010277 |
| 1746574846 | 1933 | 1933 | College Humor                          | College Humor                          | Ruggles, Wesley      | Wesley Ruggles      | tt0023900 |
| 1745282664 | 2005 | 2005 | Constantine                            | Constantine                            | Lawrence, Francis    | Francis Lawrence    | tt0360486 |
| 1746504150 | 1918 | 1918 | The Love Swindle                       | The Love Swindle                       | Dillon, Jack         | John Francis Dillon | tt0009320 |
| 1745374354 | 2009 | 2009 | The Answer Man                         | The Answer Man                         | Hindman, John        | John Hindman        | tt1187041 |
| 1746200496 | 1969 | 1969 | The Great Bank Robbery                 | The Great Bank Robbery                 | Averback, Hy         | Hy Averback         | tt0064391 |
| 1746524897 | 1927 | 1927 | East Side, West Side                   | East Side, West Side                   | Dwan, Allan          | Allan Dwan          | tt0017841 |
| 1746530678 | 1949 | 1949 | State Department File 649              | State Department: File 649             | Stewart, Peter       | Sam Newfield        | tt0041918 |
| 1746569678 | 1957 | 1957 | 20 Million Miles to Earth              | 20 Million Miles to Earth              | Juran, Nathan        | Nathan Juran        | tt0050084 |
| 1746582487 | 1937 | 1937 | Battle of Greed                        | Battle of Greed                        | Higgin, Howard       | Howard Higgin       | tt0028614 |
| 1746560940 | 1932 | 1932 | Gorilla Ship                           | Gorilla Ship                           | Strayer, Frank       | Frank R. Strayer    | tt0022957 |
| 1746578985 | 1960 | 1960 | Ski Troop Attack                       | Ski Troop Attack                       | Corman, Roger        | Roger Corman        | tt0054315 |
| 1746498299 | 1918 | 1918 | A Perfect 36                           | A Perfect 36                           | Giblyn, Charles      | Charles Giblyn      | tt0009485 |
| 1769970711 | 1915 | 1915 | A Bush Ranger at Bay                   | A Bushranger at Bay                    |                      | James W. Horne      | tt3140194 |
| 1746577615 | 1937 | 1937 | Land Beyond the Law                    | Land Beyond the Law                    | Eason, B. Reeves     | B. Reeves Eason     | tt0029109 |
| 1746583656 | 1931 | 1931 | Women Love Once                        | Women Love Once                        | Goodman, Edward      | Edward Goodman      | tt0022574 |
| 1746492573 | 1944 | 1943 | Tender Comrade                         | Tender Comrade                         | Dmytryk, Edward      | Edward Dmytryk      | tt0036418 |
| 1746574474 | 1934 | 1934 | A Modern Hero                          | A Modern Hero                          | Pabst, G. W.         | Georg Wilhelm Pabst | tt0025510 |
| 1746235324 | 1976 | 1976 | Murder by Death                        | Murder by Death                        | Moore, Robert        | Robert Moore        | tt0074937 |
| 1746516108 | 1921 | 1921 | After Your Own Heart                   | After Your Own Heart                   | Marshall, George E.  | George Marshall     | tt0011911 |
| 1746524907 | 1916 | 1916 | According to Law                       | According to Law                       | Garrick, Richard     | Richard Garrick     | tt0006336 |

|            |      |      |                                                            |                                                            |                               |                      |           |
|------------|------|------|------------------------------------------------------------|------------------------------------------------------------|-------------------------------|----------------------|-----------|
| 1746580841 | 1934 | 1934 | Charlie Chan's Courage                                     | Charlie Chan's Courage                                     | Hadden, George; Forde, Eugene | Eugene Forde         | tt0024969 |
| 1746580271 | 1936 | 1936 | Gambling with Souls                                        | Gambling with Souls                                        | Clifton, Elmer                | Elmer Clifton        | tt0027654 |
| 1746198052 | 1966 | 1966 | Lord Love a Duck                                           | Lord Love a Duck                                           | Axelrod, George               | George Axelrod       | tt0060636 |
| 1746248821 | 1976 | 1976 | Dr. Black Mr. Hyde                                         | Dr. Black, Mr. Hyde                                        | Crain, William                | William Crain        | tt0074430 |
| 1746475527 | 1944 | 1944 | Hi, Beautiful                                              | Hi, Beautiful                                              | Goodwins, Leslie              | Leslie Goodwins      | tt0036916 |
| 1746500969 | 1916 | 1916 | The Soul of a Child                                        | The Soul of a Child                                        | Gorman, Jack                  | John Gorman          | tt0158979 |
| 1746575037 | 1935 | 1935 | Stranded                                                   | Stranded                                                   | Borzage, Frank                | Frank Borzage        | tt0027050 |
| 1746513055 | 1910 | 1910 | Uncle Tom's Cabin                                          | Uncle Tom's Cabin                                          | O'Neil, Barry                 | Barry O'Neil         | tt0348277 |
| 1746256266 | 1976 | 1976 | The Pom Pom Girls                                          | The Pom Pom Girls                                          | Ruben, Joseph                 | Joseph Ruben         | tt0075086 |
| 1769971128 | 1969 | 1969 | Meeting on 69th Street                                     | Meeting on 69th Street                                     | Peacock, Kemper               | Kemper Peacock       | tt0251246 |
| 1746581733 | 1928 | 1928 | Two Gun Murphy                                             | Two Gun Murphy                                             |                               |                      | tt0174297 |
| 1746574934 | 1935 | 1935 | In Old Kentucky                                            | In Old Kentucky                                            | Marshall, George              | George Marshall      | tt0026524 |
| 1746464781 | 1942 | 1942 | The Hidden Hand                                            | The Hidden Hand                                            | Stoloff, Ben                  | Benjamin Stoloff     | tt0034850 |
| 1746584998 | 1939 | 1939 | Broadway Serenade                                          | Broadway Serenade                                          | Leonard, Robert Z.            | Robert Z. Leonard    | tt0031121 |
| 1746508473 | 1925 | 1925 | A Little Girl in a Big City                                | A Little Girl in a Big City                                | King, Burton                  | Burton L. King       | tt0016031 |
| 1746570968 | 1934 | 1934 | Tomorrow's Youth                                           | Tomorrow's Youth                                           | Lamont, Charles               | Charles Lamont       | tt0027121 |
| 1746500963 | 1914 | 1914 | The Last Volunteer                                         | The Last Volunteer                                         | Apfel, Oscar C.               | Oscar Apfel          | tt0004208 |
| 1746465221 | 1947 | 1947 | Gas House Kids Go West                                     | Gas House Kids Go West                                     | Beaudine, William             | William Beaudine     | tt0039411 |
| 1769970728 | 1915 | 1915 | The Bride of Guadalupe                                     | The Bride of Guadalupe                                     | Edwards, Walter               | Walter Edwards       | tt0421809 |
| 1746185863 | 1966 | 1966 | Sing a Song, for Heaven's Sake                             | Sing a Song for Heaven's Sake                              | Van Court, Ulf                | Ulf van Court        | tt1708436 |
| 1746584197 | 1935 | 1935 | \$10 Raise                                                 | \$10 Raise                                                 | Marshall, George              | George Marshall      | tt0027083 |
| 1745359351 | 2009 | 2009 | Surrogates                                                 | Surrogates                                                 | Mostow, Jonathan              | Jonathan Mostow      | tt0986263 |
| 1746584177 | 1939 | 1939 | It's a Wonderful World                                     | It's a Wonderful World                                     | Van Dyke, W. S.               | W.S. Van Dyke        | tt0031500 |
| 1746219376 | 1973 | 1973 | Hell Up in Harlem                                          | Hell Up in Harlem                                          | Cohen, Larry                  | Larry Cohen          | tt0070169 |
| 1746532846 | 1915 | 1915 | The Heart of Maryland                                      | The Heart of Maryland                                      | Brenon, Herbert               | Herbert Brenon       | tt0005449 |
| 1746500144 | 1924 | 1924 | The Terror of Pueblo                                       | The Terror of Pueblo                                       |                               |                      | tt0169301 |
| 1746436200 | 1997 | 1997 | Midnight in the Garden of Good and Evil                    | Midnight in the Garden of Good and Evil                    | Eastwood, Clint               | Clint Eastwood       | tt0119668 |
| 1746574097 | 1959 | 1959 | The Lonely Sex                                             | The Lonely Sex                                             | Hilliard, Richard             | Richard Hilliard     | tt0132287 |
| 1746532711 | 1913 | 1913 | The Shame of the Empire State                              | The Shame of the Empire State                              | Rubinstein, Leon J.           | Leon J. Rubinstein   | tt0003366 |
| 1746584786 | 1929 | 1929 | The Rainbow Man                                            | The Rainbow Man                                            | Newmeyer, Fred                | Fred C. Newmeyer     | tt0020308 |
| 1746577736 | 1936 | 1936 | Lady Be Careful                                            | Lady Be Careful                                            | Reed, Theodore                | Theodore Reed        | tt0027861 |
| 1746410166 | 1981 | 1981 | Going Ape!                                                 | Going Ape!                                                 | Kronsberg, Jeremy Joe         | Jeremy Joe Kronsberg | tt0082457 |
| 1746454684 | 1946 | 1946 | Freddie Steps Out                                          | Freddie Steps Out                                          | Dreifuss, Arthur              | Arthur Dreifuss      | tt0038535 |
| 1746453551 | 1941 | 1941 | New York Town                                              | New York Town                                              | Vidor, Charles                | Charles Vidor        | tt0033947 |
| 1746520642 | 1927 | 1927 | Land of the Lawless                                        | Land of the Lawless                                        | Buckingham, Thomas            | Tom Buckingham       | tt0135518 |
| 1746578975 | 1951 | 1951 | The Guy Who Came Back                                      | The Guy Who Came Back                                      | Newman, Joseph                | Joseph M. Newman     | tt0043609 |
| 1746492237 | 1944 | 1944 | Girl in the Case                                           | Girl in the Case                                           | Berke, William                | William Berke        | tt0036867 |
| 1746577737 | 1935 | 1935 | Party Wire                                                 | Party Wire                                                 | Kenton, Erle C.               | Erle C. Kenton       | tt0026852 |
| 1746583489 | 1928 | 1928 | The Cheer Leader                                           | The Cheer Leader                                           | Neitz, Alvin J.               | Alan James           | tt0018762 |
| 1746584289 | 1938 | 1938 | Block-Heads                                                | Block Heads                                                | Blystone, John G.             | John G. Blystone     | tt0029923 |
| 1746420225 | 1988 | 1988 | Rain Man                                                   | Rain Man                                                   | Levinson, Barry               | Barry Levinson       | tt0095953 |
| 1745341233 | 2002 | 2002 | The Adventures of Pluto Nash                               | The Adventures of Pluto Nash                               | Underwood, Ron                | Ron Underwood        | tt0180052 |
| 1746532728 | 1916 | 1916 | The Hidden Law                                             | The Hidden Law                                             |                               |                      | tt0157753 |
| 1746569625 | 1958 | 1958 | Hell Squad                                                 | Hell Squad                                                 | Topper, Burt                  | Burt Topper          | tt0182218 |
| 1746583122 | 1936 | 1936 | Roaming Lady                                               | Roaming Lady                                               | Rogell, Albert S.             | Albert S. Rogell     | tt0028193 |
| 1746500219 | 1925 | 1925 | The Unnamed Woman                                          | The Unnamed Woman                                          | Hoyt, Harry O.                | Harry O. Hoyt        | tt0016476 |
| 1746435423 | 1989 | 1989 | The Toxic Avenger Part III: The Last Temptation of Avenger | The Toxic Avenger Part III: The Last Temptation of Avenger | Herz, Michael; Kaufman, Lloyd | Michael Herz         | tt0098502 |
| 1746453886 | 1995 | 1995 | Crimson Tide                                               | Crimson Tide                                               | Scott, Tony                   | Tony Scott           | tt0112740 |
| 1746523705 | 1923 | 1923 | Don Quickshot of the Rio Grande                            | Don Quickshot of the Rio Grande                            | Marshall, George E.           | George Marshall      | tt0013997 |
| 1746577903 | 1936 | 1936 | Mind Your Own Business                                     | Mind Your Own Business                                     | McLeod, Norman Z.             | Norman Z. McLeod     | tt0029252 |
| 1746491788 | 1947 | 1947 | Fear in the Night                                          | Fear in the Night                                          | Shane, Maxwell                | Maxwell Shane        | tt0039372 |
| 1745359156 | 2009 | 2009 | Night at the Museum: Battle of the Smithsonian             | Night at the Museum: Battle of the Smithsonian             | Levy, Shawn                   | Shawn Levy           | tt1078912 |
| 1746570863 | 1952 | 1952 | Love Island                                                | Love Island                                                | Pollard, Bud                  | Bud Pollard          | tt0044853 |
| 1746553903 | 1965 | 1965 | Two on a Guillotine                                        | Two on a Guillotine                                        | Conrad, William               | William Conrad       | tt0059837 |
| 1746533021 | 1916 | 1916 | The Lights of New York                                     | Lights of New York                                         | Brooke, Van Dyke              | Van Dyke Brooke      | tt0163059 |
| 1746435383 | 1998 | 1998 | Celebrity                                                  | Celebrity                                                  | Allen, Woody                  | Woody Allen          | tt0120533 |
| 1746533185 | 1923 | 1923 | The Broken Violin                                          | The Broken Violin                                          | Dillon, Jack                  | John Francis Dillon  | tt0013897 |

|                   |             |             |                                   |                                   |                                      |                           |                  |
|-------------------|-------------|-------------|-----------------------------------|-----------------------------------|--------------------------------------|---------------------------|------------------|
| 1746409489        | 1982        | 1982        | The Beast Within                  | The Beast Within                  | Mora, Philippe                       | Philippe Mora             | tt0083629        |
| 1746235546        | 1980        | 1980        | Used Cars                         | Used Cars                         | Zemeckis, Robert                     | Robert Zemeckis           | tt0081698        |
| 1746565891        | 1956        | 1955        | One Way Ticket to Hell            | One Way Ticket to Hell            | Price, B. Lawrence                   | Bamlet Lawrence Price Jr. | tt0045223        |
| 1746585164        | 1929        | 1929        | Prisoners                         | Prisoners                         | Seiter, William A.                   | William A. Seiter         | tt0020291        |
| 1745357728        | 2010        | 2010        | The Spy Next Door                 | The Spy Next Door                 | Levant, Brian                        | Brian Levant              | tt1273678        |
| 1746501887        | 1915        | 1915        | Keep Moving                       | Keep Moving                       | Myll, Louis                          | Louis Myll                | tt0005585        |
| 1746503494        | 1921        | 1920        | Number 17                         | Number 17                         | Beranger, George A.                  | George Beranger           | tt0011520        |
| 1746464937        | 1945        | 1945        | A Song to Remember                | A Song to Remember                | Vidor, Charles                       | Charles Vidor             | tt0038104        |
| 1746507741        | 1924        | 1924        | Behind the Curtain                | Behind the Curtain                | Franklin, Chester M.                 | Chester M. Franklin       | tt0014708        |
| 1746199003        | 1969        | 1969        | The Ice House                     | The Ice House                     | McGowan, Stuart E.                   | Stuart E. McGowan         | tt0064466        |
| 1746584045        | 1934        | 1934        | Wings over Africa                 | Wings Over Africa                 |                                      |                           | tt0130369        |
| 1746585300        | 1929        | 1929        | Not Quite Decent                  | Not Quite Decent                  | Cummings, Irving                     | Irving Cummings           | tt0020226        |
| 1746566255        | 1955        | 1955        | You're Never Too Young            | You're Never Too Young            | Taugog, Norman                       | Norman Taurog             | tt0048822        |
| 1746454693        | 1942        | 1942        | Dr. Renault's Secret              | Dr. Renault's Secret              | Lachman, Harry                       | Harry Lachman             | tt0034681        |
| 1746498476        | 1919        | 1919        | The False Code                    | The False Code                    | Warde, Ernest C.                     | Ernest C. Warde           | tt0190391        |
| 1746512755        | 1915        | 1915        | In the Tennessee Hills            | In the Tennessee Hills            | Vincent, James                       | James Vincent             | tt0252542        |
| 1746516150        | 1921        | 1921        | A Cowboy Ace                      | The Cowboy Ace                    | Franchon, Leonard                    | Leonard Franchon          | tt0012074        |
| 1746508601        | 1926        | 1926        | Home Sweet Home                   | Home Sweet Home                   | Gorman, John                         | John Gorman               | tt1368094        |
| 1746578957        | 1958        | 1957        | Wild Is the Wind                  | Wild Is the Wind                  | Cukor, George                        | George Cukor              | tt0051193        |
| 1746524113        | 1923        | 1923        | The Dancer of the Nile            | The Dancer of the Nile            | Earle, William P. S.                 | William P. S. Earle       | tt0013966        |
| 1746584888        | 1939        | 1939        | Unborn Souls                      | Unborn Souls                      | Frazier, Del                         | Del Frazier               | tt2519396        |
| 1746454673        | 1942        | 1942        | The Sombrero Kid                  | The Sombrero Kid                  | Sherman, George                      | George Sherman            | tt0035355        |
| 1746530695        | 1948        | 1948        | Dead Man's Gold                   | Dead Man's Gold                   | Taylor, Ray                          | Ray Taylor                | tt0040277        |
| 1746574498        | 1934        | 1934        | Hold That Girl                    | Hold That Girl                    | MacFadden, Hamilton                  | Hamilton MacFadden        | tt0025259        |
| 1746504049        | 1920        | 1920        | Heritage                          | Heritage                          | Roubert, William L.                  | William L. Roubert        | tt0195779        |
| 1746435219        | 1942        | 1942        | Overland Stagecoach               | Overland Stagecoach               | Newfield, Sam                        | Sam Newfield              | tt0035166        |
| 1746464913        | 1946        | 1946        | Do You Love Me                    | Do You Love Me                    | Ratoff, Gregory                      | Gregory Ratoff            | tt0038484        |
| 1746566080        | 1957        | 1957        | Tomahawk Trail                    | Tomahawk Trail                    | Selander, Lesley                     | Lesley Selander           | tt0165990        |
| 1746235474        | 1971        | 1972        | Angels' Wild Women                | Angels' Wild Women                | Adamson, Al                          | Al Adamson                | tt0068211        |
| 1746577525        | 1933        | 1933        | Lone Cowboy                       | Lone Cowboy                       | Sloane, Paul                         | Paul Sloane               | tt0025416        |
| 1746454062        | 1941        | 1941        | Nine Lives Are Not Enough         | Nine Lives Are Not Enough         | Sutherland, A. Edward                | A. Edward Sutherland      | tt0033955        |
| 1746485152        | 1919        | 1919        | Crooked Straight                  | Crooked Straight                  | Storm, Jerome                        | Jerome Storm              | tt0189453        |
| 1746496249        | 1919        | 1919        | The Forfeit                       | The Forfeit                       | Powell, Frank                        | Frank Powell              | tt0010143        |
| 1746235463        | 1973        | 1973        | Idaho Transfer                    | Idaho Transfer                    | Fonda, Peter; Matthiesen, Tom        | Peter Fonda               | tt0071647        |
| 1746464779        | 1944        | 1944        | Maisie Goes to Reno               | Maisie Goes to Reno               | Beaumont, Harry                      | Harry Beaumont            | tt0037040        |
| 1746561160        | 1932        | 1932        | The Widow in Scarlet              | The Widow in Scarlet              | Seitz, George B.                     | George B. Seitz           | tt0023698        |
| 1746508501        | 1924        | 1924        | The Woman on the Jury             | The Woman on the Jury             | Hoyt, Harry O.                       | Harry O. Hoyt             | tt0015507        |
| 1745358912        | 2003        | 2003        | Something's Gotta Give            | Something's Gotta Give            | Meyers, Nancy                        | Nancy Meyers              | tt0337741        |
| 1746465105        | 1942        | 1942        | The Mystery of Marie Roget        | Mystery of Marie Roget            | Rosen, Phil                          | Phil Rosen                | tt0035107        |
| <b>1746570002</b> | <b>1962</b> | <b>1962</b> | <b>The Three Stooges in Orbit</b> | <b>The Three Stooges in Orbit</b> | <b>Bernds, Edward</b>                | <b>Edward Bernds</b>      | <b>tt0056580</b> |
| 1746473758        | 1942        | 1942        | The Girl from Alaska              | The Girl from Alaska              | Grinde, Nick                         | Nick Grinde               | tt0034795        |
| 1746520667        | 1949        | 1949        | And Baby Makes Three              | And Baby Makes Three              | Levin, Henry                         | Henry Levin               | tt0041122        |
| 1746571662        | 1931        | 1931        | Stepping Out                      | Stepping Out                      | Riesner, Charles F.                  | Charles Reisner           | tt0022432        |
| 1746583171        | 1940        | 1940        | Midnight Limited                  | Midnight Limited                  | Bretherton, Howard                   | Howard Bretherton         | tt0032790        |
| 1746555170        | 1956        | 1956        | Giant                             | Giant                             | Stevens, George                      | George Stevens            | tt0049261        |
| 1746503341        | 1922        | 1922        | When the Devil Drives             | When the Devil Drives             | Scardon, Paul                        | Paul Scardon              | tt0013755        |
| 1746210495        | 1972        | 1971        | Women in Revolt                   | Women in Revolt                   | Morrissey, Paul; Warhol, Andy        | Paul Morrissey            | tt0129631        |
| 1746508905        | 1924        | 1924        | Pioneer's Gold                    | Pioneer's Gold                    | Dixon, Denver                        | Victor Adamson            | tt0015234        |
| 1746499894        | 1924        | 1924        | Midnight Secrets                  | Midnight Secrets                  | Nelson, Jack                         | Jack Nelson               | tt0015134        |
| 1746513080        | 1923        | 1923        | Danger                            | Danger                            | Elfelt, Clifford S.                  | Clifford S. Elfelt        | tt0013967        |
| 1746516282        | 1921        | 1921        | Her Mad Bargain                   | Her Mad Bargain                   | Carewe, Edwin                        | Edwin Carewe              | tt0012270        |
| 1746584694        | 1930        | 1930        | Such Men Are Dangerous            | Such Men Are Dangerous            | Hawks, Kenneth                       | Kenneth Hawks             | tt0021432        |
| 1746501919        | 1916        | 1916        | The Ransom                        | The Ransom                        | Lawrence, Edmund                     | Edmund Lawrence           | tt0158885        |
| 1746577731        | 1936        | 1936        | F-Man                             | F Man                             | Cline, Edward F.                     | Edward F. Cline           | tt0027596        |
| 1746580834        | 1936        | 1936        | Hideaway Girl                     | Hideaway Girl                     | Archainbaud, George                  | George Archainbaud        | tt0027740        |
| 1746562232        | 1956        | 1956        | Seven Wonders of the World        | Seven Wonders of the World        | Garnett, Tay; Mantz, Paul; Marton, A | Tay Garnett               | tt0049744        |
| 1746434978        | 1998        | 1998        | Deep Rising                       | Deep Rising                       | Sommers, Stephen                     | Stephen Sommers           | tt0118956        |

|            |      |      |                                   |                                   |                               |                        |           |
|------------|------|------|-----------------------------------|-----------------------------------|-------------------------------|------------------------|-----------|
| 1746583714 | 1931 | 1931 | Doctors' Wives                    | Doctors' Wives                    | Borzage, Frank                | Frank Borzage          | tt0021804 |
| 1746520553 | 1926 | 1926 | You'd Be Surprised                | You'd Be Surprised                | Rosson, Arthur                | Arthur Rosson          | tt0017585 |
| 1746585202 | 1930 | 1930 | The Unholy Three                  | The Unholy Three                  | Conway, Jack                  | Jack Conway            | tt0021505 |
| 1746554076 | 1964 | 1964 | Georg                             | Georg                             | Kaye, Stanton                 | Stanton Kaye           | tt4883026 |
| 1746574828 | 1936 | 1936 | Hitch Hike to Heaven              | Hitch Hike to Heaven              | Strayer, Frank R.             | Frank R. Strayer       | tt0027751 |
| 1746502702 | 1914 | 1914 | Judith of Bethulia                | Judith of Bethulia                | Griffith, D. W.               | D.W. Griffith          | tt0004181 |
| 1746503733 | 1921 | 1921 | The Wolverine                     | The Wolverine                     | Bertram, William              | William Bertram        | tt0180313 |
| 1746491800 | 1944 | 1944 | Stagecoach to Monterey            | Stagecoach to Monterey            | Selander, Lesley              | Lesley Selander        | tt0037309 |
| 1746524207 | 1916 | 1916 | Powder                            | Powder                            | Maude, Arthur                 | Arthur Maude           | tt0007205 |
| 1746525123 | 1919 | 1919 | The Unpardonable Sin              | The Unpardonable Sin              | Neilan, Marshall              | Marshall Neilan        | tt0010825 |
| 1746560212 | 1963 | 1963 | The Old Dark House                | The Old Dark House                | Castle, William               | William Castle         | tt0057379 |
| 1746570228 | 1933 | 1933 | Silent Men                        | Silent Men                        | Lederman, D. Ross             | D. Ross Lederman       | tt0024558 |
| 1746523279 | 1928 | 1928 | Let 'Er Go Gallegher              | Let 'Er Go Gallegher              | Clifton, Elmer                | Elmer Clifton          | tt0019085 |
| 1746569794 | 1958 | 1958 | China Doll                        | China Doll                        | Borzage, Frank                | Frank Borzage          | tt0051476 |
| 1745293943 | 2005 | 2005 | Dreamer: Inspired by a True Story | Dreamer: Inspired by a True Story | Gatins, John                  | John Gatins            | tt0418647 |
| 1746573750 | 1960 | 1960 | The 3 Worlds of Gulliver          | The 3 Worlds of Gulliver          | Sher, Jack                    | Jack Sher              | tt0053882 |
| 1746464766 | 1946 | 1946 | Susie Steps Out                   | Susie Steps Out                   | LeBorg, Reginald              | Reginald Le Borg       | tt0038999 |
| 1746499846 | 1948 | 1948 | Homecoming                        | Homecoming                        | LeRoy, Mervyn                 | Mervyn LeRoy           | tt0040446 |
| 1746500495 | 1925 | 1925 | The Lawful Cheater                | The Lawful Cheater                | O'Connor, Frank               | Frank O'Connor         | tt0016011 |
| 1746576009 | 1931 | 1931 | Their Mad Moment                  | Their Mad Moment                  | Sprague, Chandler             | Hamilton MacFadden     | tt0022476 |
| 1746394691 | 1991 | 1991 | Thelma & Louise                   | Thelma & Louise                   | Scott, Ridley                 | Ridley Scott           | tt0103074 |
| 1746584207 | 1937 | 1936 | One in a Million                  | One in a Million                  | Lanfield, Sidney              | Sidney Lanfield        | tt0028063 |
| 1746234877 | 1968 | 1968 | Attack on the Iron Coast          | Attack on the Iron Coast          | Wendkos, Paul                 | Paul Wendkos           | tt0062688 |
| 1746578891 | 1961 | 1961 | Days of Thrills and Laughter      | Days of Thrills and Laughter      |                               | Robert Youngson        | tt0054791 |
| 1746437855 | 1941 | 1940 | Dark Streets of Cairo             | Dark Streets of Cairo             | Kardos, Leslie                | László Kardos          | tt0033514 |
| 1746582901 | 1938 | 1938 | The Man from Music Mountain       | Man from Music Mountain           | Kane, Joe                     | Joseph Kane            | tt0030409 |
| 1746586163 | 1939 | 1939 | Unexpected Father                 | Unexpected Father                 | Lamont, Charles               | Charles Lamont         | tt0032078 |
| 1746520354 | 1950 | 1950 | Love That Brute                   | Love That Brute                   | Hall, Alexander               | Alexander Hall         | tt0042688 |
| 1746570977 | 1933 | 1933 | I Loved You Wednesday             | I Loved You Wednesday             | King, Henry; Menzies, William | Henry King             | tt0024159 |
| 1746504043 | 1919 | 1919 | My Little Sister                  | My Little Sister                  | Buel, Kenean                  | Kenean Buel            | tt0010496 |
| 1746424007 | 1942 | 1942 | The Mysterious Rider              | The Mysterious Rider              | Scott, Sherman                | Sam Newfield           | tt0035106 |
| 1769971949 | 1969 | 1969 | Monique My Love                   | Monique, My Love                  | Woodcock, Peter               | Peter Woodcock         | tt1043859 |
| 1746409685 | 1987 | 1987 | Superman IV: The Quest for Peace  | Superman IV: The Quest for Peace  | Furie, Sidney J.              | Sidney J. Furie        | tt0094074 |
| 1746408902 | 1984 | 1984 | Grandview, U.S.A.                 | Grandview, U.S.A.                 | Kleiser, Randal               | Randal Kleiser         | tt0087359 |
| 1746580230 | 1936 | 1936 | Lady of Secrets                   | Lady of Secrets                   | Gering, Marion                | Marion Gering          | tt0027865 |
| 1746436081 | 1942 | 1942 | Girl Trouble                      | Girl Trouble                      | Schuster, Harold              | Harold D. Schuster     | tt0034794 |
| 1746523954 | 1916 | 1916 | The Sex Lure                      | The Sex Lure                      | Abramson, Ivan                | Ivan Abramson          | tt0158939 |
| 1746503797 | 1918 | 1918 | Up the Road with Sallie           | Up the Road with Sallie           | Taylor, William D.            | William Desmond Taylor | tt0009749 |
| 1746436252 | 1999 | 1999 | The Minus Man                     | The Minus Man                     | Fancher, Hampton              | Hampton Fancher        | tt0151582 |
| 1769970721 | 1912 | 1912 | The Man They Scorned              | The Man They Scorned              |                               | Reginald Barker        | tt0806763 |
| 1746508497 | 1924 | 1924 | The Confidence Man                | The Confidence Man                | Heerman, Victor               | Victor Heerman         | tt0014798 |
| 1746577924 | 1937 | 1937 | Girls Can Play                    | Girls Can Play                    | Hillyer, Lambert              | Lambert Hillyer        | tt0028933 |
| 1746580289 | 1939 | 1939 | The Long Shot                     | Long Shot                         | Lamont, Charles               | Charles Lamont         | tt0031590 |
| 1769971913 | 1969 | 1969 | The Divorcee                      | The Divorcee                      | Stephen, A. C.                | Stephen C. Apostolof   | tt0124410 |
| 1746438299 | 1941 | 1941 | Playmates                         | Playmates                         | Butler, David                 | David Butler           | tt0034033 |
| 1746453538 | 1943 | 1943 | London Blackout Murders           | London Blackout Murders           | Sherman, George               | George Sherman         | tt0034988 |
| 1746499930 | 1925 | 1925 | A Man of Nerve                    | A Man of Nerve                    | Chaudet, Louis                | Louis Chaudet          | tt0016082 |
| 1746410210 | 1984 | 1984 | The Ice Pirates                   | The Ice Pirates                   | Raffill, Stewart              | Stewart Raffill        | tt0087451 |
| 1746410218 | 1989 | 1989 | Next of Kin                       | Next of Kin                       | Irvin, John                   | John Irvin             | tt0097967 |
| 1746500015 | 1946 | 1945 | Secrets of a Sorority Girl        | Secrets of a Sorority Girl        | Landers, Lew; Wisbar, Frank   | Frank Wisbar           | tt0038918 |
| 1746410848 | 1993 | 1993 | Mad Dog and Glory                 | Mad Dog and Glory                 | McNaughton, John              | John McNaughton        | tt0107473 |
| 1746563831 | 1952 | 1952 | The Kid from Broken Gun           | The Kid from Broken Gun           | Sears, Fred F.                | Fred F. Sears          | tt0044795 |
| 1746583127 | 1939 | 1939 | Navy Secrets                      | Navy Secrets                      | Bretherton, Howard            | Howard Bretherton      | tt0031715 |
| 1746564450 | 1952 | 1952 | Carrie                            | Carrie                            | Wylar, William                | William Wylar          | tt0044486 |
| 1746583420 | 1951 | 1951 | Lightning Strikes Twice           | Lightning Strikes Twice           | Vidor, King                   | King Vidor             | tt0043744 |
| 1746424217 | 1941 | 1941 | Steel Against the Sky             | Steel Against the Sky             | Sutherland, A. Edward         | A. Edward Sutherland   | tt0034232 |
| 1746520907 | 1949 | 1950 | Side Street                       | Side Street                       | Mann, Anthony                 | Anthony Mann           | tt0042960 |

|                   |             |             |                                                |                                                |                             |                     |                  |
|-------------------|-------------|-------------|------------------------------------------------|------------------------------------------------|-----------------------------|---------------------|------------------|
| 1746485213        | 1917        | 1917        | Forbidden Paths                                | Forbidden Paths                                | Thornby, Robert T.          | Robert Thornby      | tt0007968        |
| 1746454054        | 1943        | 1943        | The Hard Way                                   | The Hard Way                                   | Sherman, Vincent            | Vincent Sherman     | tt0034828        |
| 1745341999        | 2003        | 2003        | The Singing Detective                          | The Singing Detective                          | Gordon, Keith               | Keith Gordon        | tt0314676        |
| 1746574935        | 1936        | 1936        | The Gorgeous Hussy                             | The Gorgeous Hussy                             | Brown, Clarence             | Clarence Brown      | tt0027690        |
| 1746566230        | 1955        | 1955        | Rage at Dawn                                   | Rage at Dawn                                   | Whelan, Tim                 | Tim Whelan          | tt0048535        |
| 1746585375        | 1939        | 1939        | Thou Shalt Not Kill                            | Thou Shalt Not Kill                            | Auer, John H.               | John H. Auer        | tt0033156        |
| 1746555848        | 1955        | 1955        | Moonfleet                                      | Moonfleet                                      | Lang, Fritz                 | Fritz Lang          | tt0048387        |
| 1746497609        | 1921        | 1921        | The Queen of Sheba                             | The Queen of Sheba                             | Edwards, J. Gordon          | J. Gordon Edwards   | tt0012600        |
| 1746503770        | 1918        | 1918        | Little Orphant Annie                           | Little Orphant Annie                           | Campbell, Colin             | Colin Campbell      | tt0009306        |
| 1746455397        | 1997        | 1997        | City of Industry                               | City of Industry                               | Irvin, John                 | John Irvin          | tt0118859        |
| 1746420762        | 1989        | 1989        | sex, lies, and videotape                       | Sex, Lies, and Videotape                       | Soderbergh, Steven          | Steven Soderbergh   | tt0098724        |
| 1746199540        | 1967        | 1967        | The Gnome-Mobile                               | The Gnome Mobile                               | Stevenson, Robert           | Robert Stevenson    | tt0061715        |
| 1746582586        | 1938        | 1938        | The Last Express                               | The Last Express                               | Garrett, Otis               | Otis Garrett        | tt0030345        |
| 1746501123        | 1915        | 1915        | Sealed Valley                                  | Sealed Valley                                  | McGill, Lawrence B.         | Lawrence B. McGill  | tt0006015        |
| 1746578842        | 1960        | 1960        | The Subterraneans                              | The Subterraneans                              | MacDougall, Ranald          | Ranald MacDougall   | tt0054351        |
| 1746574799        | 1933        | 1933        | Curtain at Eight                               | Curtain at Eight                               | Hopper, E. Mason            | E. Mason Hopper     | tt0025025        |
| 1746500080        | 1945        | 1945        | Mama Loves Papa                                | Mama Loves Papa                                | Strayer, Frank              | Frank R. Strayer    | tt0037891        |
| 1746410759        | 1990        | 1990        | Sibling Rivalry                                | Sibling Rivalry                                | Reiner, Carl                | Carl Reiner         | tt0100611        |
| 1746582365        | 1930        | 1930        | Lucky Larkin                                   | Lucky Larkin                                   | Brown, Harry J.             | Harry Joe Brown     | tt0021104        |
| 1746250331        | 1975        | 1975        | Doc Savage...The Man of Bronze                 | Doc Savage: The Man of Bronze                  | Anderson, Michael           | Michael Anderson    | tt0072886        |
| 1746435690        | 1942        | 1942        | Counter-Espionage                              | Counter Espionage                              | Dmytryk, Edward             | Edward Dmytryk      | tt0034617        |
| 1746574809        | 1936        | 1936        | Brilliant Marriage                             | Brilliant Marriage                             | Rosen, Phil                 | Phil Rosen          | tt0027399        |
| 1746584688        | 1930        | 1930        | The Last of the Lone Wolf                      | The Last of the Lone Wolf                      | Boleslavsky, Richard        | Richard Boleslawski | tt0021052        |
| 1746217606        | 1968        | 1968        | Private Relations                              | Private Relations                              | Crane, Larry                | Larry Crane         | tt0128422        |
| 1745272583        | 2000        | 2000        | Pollock                                        | Pollock                                        | Harris, Ed                  | Ed Harris           | tt0183659        |
| 1746572568        | 1932        | 1932        | Cheaters at Play                               | Cheaters at Play                               | MacFadden, Hamilton         | Hamilton MacFadden  | tt0022757        |
| 1746514789        | 1916        | 1916        | Chickens                                       | Chickens                                       |                             | Bobby Burns         | tt0006503        |
| 1746516511        | 1920        | 1920        | The Testing Block                              | The Testing Block                              | Hillyer, Lambert            | Lambert Hillyer     | tt0011756        |
| 1746577962        | 1938        | 1938        | Phantom Gold                                   | Phantom Gold                                   | Levering, Joseph            | Joseph Levering     | tt0030580        |
| 1746576944        | 1951        | 1951        | The Golden Horde                               | The Golden Horde                               | Sherman, George             | George Sherman      | tt0043593        |
| 1746574053        | 1963        | 1963        | The Sadist                                     | The Sadist                                     | Landis, James               | James Landis        | tt0057465        |
| 1746410844        | 1993        | 1993        | Father Hood                                    | Father Hood                                    | Roodt, Darrell James        | Darrell Roodt       | tt0106877        |
| 1746562316        | 1953        | 1953        | East of Sumatra                                | East of Sumatra                                | Boetticher, Budd            | Budd Boetticher     | tt0045716        |
| 1746578895        | 1959        | 1959        | The Tingler                                    | The Tingler                                    | Castle, William             | William Castle      | tt0053363        |
| 1746570993        | 1935        | 1935        | Annie Oakley                                   | Annie Oakley                                   | Stevens, George             | George Stevens      | tt0026073        |
| 1746584121        | 1935        | 1935        | When a Man's a Man                             | When a Man's a Man                             | Cline, Edward F.            | Edward F. Cline     | tt0027202        |
| 1746409466        | 1989        | 1989        | Kickboxer                                      | Kickboxer                                      | DiSalle, Mark; Worth, David | Mark DiSalle        | tt0097659        |
| 1746500020        | 1950        | 1949        | There's a Girl in My Heart                     | There's a Girl in My Heart                     | Dreifuss, Arthur            | Arthur Dreifuss     | tt0041957        |
| <b>1746581344</b> | <b>1960</b> | <b>1960</b> | <b>The Hound That Thought He Was a Raccoon</b> | <b>The Hound That Thought He Was a Raccoon</b> | <b>McGowan, Tom</b>         | <b>Tom McGowan</b>  | <b>tt0940822</b> |
| 1746198454        | 1965        | 1965        | The Bedford Incident                           | The Bedford Incident                           | Harris, James B.            | James B. Harris     | tt0058962        |
| 1746582368        | 1930        | 1930        | Roaring Ranch                                  | Roaring Ranch                                  | Eason, Reeves               | B. Reeves Eason     | tt0021306        |
| 1746555686        | 1956        | 1956        | Carousel                                       | Carousel                                       | King, Henry                 | Henry King          | tt0049055        |
| 1746475714        | 1948        | 1948        | Deadline                                       | Deadline                                       | Drake, Oliver               | Oliver Drake        | tt0040278        |
| 1746393142        | 1981        | 1980        | The Watcher in the Woods                       | The Watcher in the Woods                       | Hough, John                 | John Hough          | tt0081738        |
| 1746566123        | 1958        | 1958        | Flood Tide                                     | Flood Tide                                     | Biberman, Abner             | Abner Biberman      | tt0051620        |
| 1746570045        | 1952        | 1952        | The Prisoner of Zenda                          | The Prisoner of Zenda                          | Thorpe, Richard             | Richard Thorpe      | tt0045053        |
| 1746520583        | 1926        | 1926        | The Son of the Sheik                           | The Son of the Sheik                           | Fitzmaurice, George         | George Fitzmaurice  | tt0017416        |
| 1746577103        | 1959        | 1959        | Okfenokee                                      | Okfenokee                                      | Haig, Roul                  | Roul Haig           | tt0053135        |
| 1746433957        | 1995        | 1995        | Casino                                         | Casino                                         | Scorsese, Martin            | Martin Scorsese     | tt0112641        |
| 1746583740        | 1929        | 1929        | The Phantom of the North                       | The Phantom of the North                       | Webb, Harry                 | Harry S. Webb       | tt0020268        |
| 1746514844        | 1923        | 1923        | The Acquittal                                  | The Acquittal                                  | Brown, Clarence             | Clarence Brown      | tt0013815        |
| 1746499892        | 1948        | 1948        | The Arkansas Swing                             | The Arkansas Swing                             | Nazarro, Ray                | Ray Nazarro         | tt0309299        |
| 1746578677        | 1960        | 1960        | Let No Man Write My Epitaph                    | Let No Man Write My Epitaph                    | Leacock, Philip             | Philip Leacock      | tt0054021        |
| 1746499860        | 1945        | 1945        | The Kid Sister                                 | The Kid Sister                                 | Newfield, Sam               | Sam Newfield        | tt0037847        |
| 1746585080        | 1929        | 1929        | Grace Johnston and the Indiana Five            | Grace Johnston and The Indiana Five            |                             | Murray Roth         | tt1538485        |
| 1746584792        | 1930        | 1930        | The Rogue Song                                 | The Rogue Song                                 | Barrymore, Lionel           | Lionel Barrymore    | tt0021307        |
| 1746514818        | 1917        | 1917        | The Barker                                     | The Barker                                     | Richmond, J. A.             | J.A. Richmond       | tt0167024        |

|            |      |      |                                               |                                           |                      |                     |           |
|------------|------|------|-----------------------------------------------|-------------------------------------------|----------------------|---------------------|-----------|
| 1746561678 | 1965 | 1965 | Ski Party                                     | Ski Party                                 | Rafkin, Alan         | Alan Rafkin         | tt0059726 |
| 1746523423 | 1916 | 1916 | Life's Blind Alley                            | Life's Blind Alley                        |                      | Tom Ricketts        | tt0006919 |
| 1746566976 | 1934 | 1934 | Forsaking All Others                          | Forsaking All Others                      | Van Dyke, W. S.      | W.S. Van Dyke       | tt0025132 |
| 1746566830 | 1932 | 1932 | The Scarlet Brand                             | The Scarlet Brand                         | McGowan, J. P.       | J.P. McGowan        | tt0023428 |
| 1746533184 | 1916 | 1916 | The Immortal Flame                            | The Immortal Flame                        | Abramson, Ivan       | Ivan Abramson       | tt0157795 |
| 1745309220 | 2007 | 2007 | Sweeney Todd The Demon Barber of Fleet Street | Sweeney Todd: The Demon Barber of Fleet S | Burton, Tim          | Tim Burton          | tt0408236 |
| 1746210369 | 1971 | 1971 | Cry Uncle                                     | Cry Uncle                                 | Avildsen, John G.    | John G. Avildsen    | tt0066960 |
| 1746474958 | 1944 | 1944 | Mademoiselle Fifi                             | Mademoiselle Fifi                         | Wise, Robert         | Robert Wise         | tt0037034 |
| 1746524042 | 1917 | 1917 | Durand of the Bad Lands                       | Durand of the Bad Lands                   | Stanton, Richard     | Richard Stanton     | tt0007876 |
| 1746434029 | 1992 | 1992 | Pet Sematary II                               | Pet Sematary II                           | Lambert, Mary        | Mary Lambert        | tt0105128 |
| 1746578604 | 1959 | 1959 | Escort West                                   | Escort West                               | Lyon, Francis D.     | Francis D. Lyon     | tt0051591 |
| 1746582708 | 1938 | 1938 | Cattle Raiders                                | Cattle Raiders                            | Nelson, Sam          | Sam Nelson          | tt0029979 |
| 1745342782 | 2004 | 2003 | Los Angeles Plays Itself                      | Los Angeles Plays Itself                  | Andersen, Thom       | Thom Andersen       | tt0379357 |
| 1746424376 | 1940 | 1940 | Buzzy Rides the Range                         | Buzzy Rides the Range                     | Kahn, Richard C.     | Richard C. Kahn     | tt0041216 |
| 1746408513 | 1982 | 1982 | Swamp Thing                                   | Swamp Thing                               | Craven, Wes          | Wes Craven          | tt0084745 |
| 1746584909 | 1939 | 1939 | The Jones Family in Hollywood                 | The Jones Family in Hollywood             | St. Clair, Malcolm   | Malcolm St. Clair   | tt0031512 |
| 1746502915 | 1916 | 1916 | A Reformation Delayed                         | A Reformation Delayed                     | Mayo, Melvin         | Edward Sloman       | tt0495414 |
| 1746218738 | 1971 | 1971 | Sweet Sweetback's Baadasssss Song             | Sweet Sweetback's Baadasssss Song         | Van Peebles, Melvin  | Melvin Van Peebles  | tt0067810 |
| 1746582248 | 1931 | 1931 | Sweepstakes                                   | Sweepstakes                               | Rogell, Albert       | Albert S. Rogell    | tt0022456 |
| 1746520665 | 1948 | 1948 | Frontier Revenge                              | Frontier Revenge                          | Taylor, Ray          | Ray Taylor          | tt0041393 |
| 1745293830 | 2005 | 2005 | Happy Endings                                 | Happy Endings                             | Roos, Don            | Don Roos            | tt0361693 |
| 1746435113 | 1943 | 1943 | In Old Oklahoma                               | In Old Oklahoma                           | Rogell, Albert S.    | Albert S. Rogell    | tt0036038 |
| 1746581447 | 1928 | 1928 | Satan and the Woman                           | Satan and the Woman                       | King, Burton         | Burton L. King      | tt0019352 |
| 1746491700 | 1944 | 1944 | Henry Aldrich Plays Cupid                     | Henry Aldrich Plays Cupid                 | Bennett, Hugh        | Hugh Bennett        | tt0036907 |
| 1769969930 | 1912 | 1912 | Flying to Fortune                             | Flying to Fortune                         | Nichols, George O.   | George Nichols      | tt0414018 |
| 1746514116 | 1914 | 1914 | Ill Starred Babbie                            | Ill Starred Babbie                        | MacDonald, Sherwood  | Sherwood MacDonald  | tt0004140 |
| 1746436561 | 1943 | 1943 | The Falcon and the Co-eds                     | The Falcon and the Co eds                 | Clemens, William     | William Clemens     | tt0035855 |
| 1746561580 | 1954 | 1954 | Dangerous Mission                             | Dangerous Mission                         | King, Louis          | Louis King          | tt0046891 |
| 1745293159 | 2004 | 2004 | The Grudge                                    | The Grudge                                | Shimizu, Takashi     | Takashi Shimizu     | tt0391198 |
| 1746582938 | 1935 | 1936 | Burning Gold                                  | Burning Gold                              | Newfield, Sam        | Sam Newfield        | tt0027410 |
| 1746580319 | 1937 | 1938 | Here's Flash Casey                            | Here's Flash Casey                        | Shores, Lynn         | Lynn Shores         | tt0028994 |
| 1746524963 | 1915 | 1915 | The Incurrigible Dukane                       | The Incurrigible Dukane                   | Durkin, James        | James Durkin        | tt0005545 |
| 1746436088 | 1940 | 1940 | Dr. Kildare Goes Home                         | Dr. Kildare Goes Home                     | Bucquet, Harold S.   | Harold S. Bucquet   | tt0032414 |
| 1746217663 | 1966 | 1966 | The Glass Bottom Boat                         | The Glass Bottom Boat                     | Tashlin, Frank       | Frank Tashlin       | tt0060463 |
| 1746235934 | 1975 | 1975 | At Long Last Love                             | At Long Last Love                         | Bogdanovich, Peter   | Peter Bogdanovich   | tt0072665 |
| 1746514225 | 1923 | 1924 | Treasure Canyon                               | Treasure Canyon                           |                      | B. Reeves Eason     | tt0174278 |
| 1746492053 | 1948 | 1948 | Cowboy Cavalier                               | Cowboy Cavalier                           | Abrahams, Derwin M.  | Derwin Abrahams     | tt0040253 |
| 1746423744 | 1998 | 1998 | Baseketball                                   | BASEketball                               | Zucker, David        | David Zucker        | tt0131857 |
| 1746520294 | 1927 | 1927 | A Man's Past                                  | A Man's Past                              | Melford, George      | George Melford      | tt0018137 |
| 1746524519 | 1922 | 1922 | The Flirt                                     | The Flirt                                 | Henley, Hobart       | Hobart Henley       | tt0013138 |
| 1745373691 | 2002 | 2002 | Personal Velocity                             | Personal Velocity                         | Miller, Rebecca      | Rebecca Miller      | tt0295238 |
| 1746569513 | 1954 | 1954 | The Atomic Kid                                | The Atomic Kid                            | Martinson, Leslie H. | Leslie H. Martinson | tt0046729 |
| 1746575649 | 1931 | 1931 | The Runaround                                 | The Runaround                             | Craft, Wm. James     | William James Craft | tt0022332 |
| 1746566007 | 1954 | 1954 | Vera Cruz                                     | Vera Cruz                                 | Aldrich, Robert      | Robert Aldrich      | tt0047647 |
| 1746424243 | 1943 | 1943 | Behind the Rising Sun                         | Behind the Rising Sun                     | Dmytryk, Edward      | Edward Dmytryk      | tt0035669 |
| 1746515051 | 1916 | 1916 | Love's Sacrifice                              | Love's Sacrifice                          |                      | William H. Clifford | tt0163075 |
| 1746583925 | 1929 | 1929 | Hardboiled                                    | Hardboiled                                | Ince, Ralph          | Ralph Ince          | tt0133841 |
| 1746576729 | 1931 | 1931 | Young Donovan's Kid                           | Young Donovan's Kid                       | Niblo, Fred          | Fred Niblo          | tt0022589 |
| 1746562361 | 1954 | 1954 | Gorilla at Large                              | Gorilla at Large                          | Jones, Harmon        | Harmon Jones        | tt0047041 |
| 1746514096 | 1916 | 1916 | The Apostle of Vengeance                      | The Apostle of Vengeance                  | Hart, William S.     | William S. Hart     | tt0006367 |
| 1746439701 | 1995 | 1995 | The Usual Suspects                            | The Usual Suspects                        | Singer, Bryan        | Bryan Singer        | tt0114814 |
| 1746577505 | 1933 | 1933 | Out All Night                                 | Out All Night                             | Taylor, Sam          | Sam Taylor          | tt0024422 |
| 1746578748 | 1951 | 1951 | Prairie Roundup                               | Prairie Roundup                           | Sears, Fred F.       | Fred F. Sears       | tt0043932 |
| 1746520249 | 1926 | 1926 | The White Black Sheep                         | The White Black Sheep                     | Olcott, Sidney       | Sidney Olcott       | tt0017552 |
| 1769970619 | 1968 | 1968 | Four Kinds of Love                            | Four Kinds of Love                        | Carse, Shannon       | William Rotsler     | tt0173862 |
| 1746580631 | 1937 | 1937 | Nobody's Baby                                 | Nobody's Baby                             | Meins, Gus           | Gus Meins           | tt0029318 |
| 1746491866 | 1948 | 1948 | Beyond Glory                                  | Beyond Glory                              | Farrow, John         | John Farrow         | tt0040158 |



|            |      |      |                                             |                                             |                                       |                       |           |
|------------|------|------|---------------------------------------------|---------------------------------------------|---------------------------------------|-----------------------|-----------|
| 1746514261 | 1914 | 1914 | Such a Little Queen                         | Such a Little Queen                         | Porter, Edwin S.; Ford, Hugh          | Hugh Ford             | tt0004654 |
| 1746583540 | 1930 | 1930 | Georgia Rose                                | Georgia Rose                                | Gant, Harry A.                        | Harry A. Gant         | tt0020916 |
| 1746409773 | 1990 | 1990 | Predator 2                                  | Predator 2                                  | Hopkins, Stephen                      | Stephen Hopkins       | tt0100403 |
| 1746501880 | 1916 | 1916 | 20,000 Leagues Under the Sea                | 20,000 Leagues Under the Sea                | Paton, Stuart                         | Stuart Paton          | tt0006333 |
| 1746520824 | 1925 | 1925 | The Trouble Buster                          | The Trouble Buster                          | Maloney, Leo                          | Leo D. Maloney        | tt0016456 |
| 1746585073 | 1929 | 1929 | Bulldog Drummond                            | Bulldog Drummond                            | Jones, F. Richard                     | F. Richard Jones      | tt0019735 |
| 1746582992 | 1935 | 1935 | Vagabond Lady                               | Vagabond Lady                               | Taylor, Sam                           | Sam Taylor            | tt0025176 |
| 1746584298 | 1940 | 1940 | Music in My Heart                           | Music in My Heart                           | Santley, Joseph                       | Joseph Santley        | tt0032823 |
| 1746473730 | 1946 | 1946 | House-Rent Party                            | House Rent Party                            | Newfield, Sam                         | Sam Newfield          | tt0135460 |
| 1746394214 | 1991 | 1991 | Ernest Scared Stupid                        | Ernest Scared Stupid                        | Cherry, John                          | John R. Cherry III    | tt0101821 |
| 1746503831 | 1920 | 1920 | Life's Twist                                | Life's Twist                                | Cabanne, William Christy              | Christy Cabanne       | tt0011402 |
| 1746483839 | 1917 | 1917 | Outwitted                                   | Outwitted                                   | Baker, George D.                      | George D. Baker       | tt0008400 |
| 1746574301 | 1958 | 1958 | Thundering Jets                             | Thundering Jets                             | Dantine, Helmut                       | Helmut Dantine        | tt0052294 |
| 1746524896 | 1916 | 1916 | The Reapers                                 | The Reapers                                 | King, Burton                          | Burton L. King        | tt0007252 |
| 1746566824 | 1952 | 1952 | Red Snow                                    | Red Snow                                    | Petroff, Boris L.; Franklin, Harry S. | Harry S. Franklin     | tt0045075 |
| 1745359392 | 2002 | 2002 | The Truth About Charlie                     | The Truth About Charlie                     | Demme, Jonathan                       | Jonathan Demme        | tt0270707 |
| 1746555659 | 1955 | 1955 | Spy Chasers                                 | Spy Chasers                                 | Bernds, Edward                        | Edward Bernds         | tt0048653 |
| 1746567944 | 1933 | 1933 | Get That Venus                              | Get That Venus                              | Lee, Grover                           | Arthur Varney         | tt0024052 |
| 1745302788 | 2006 | 2006 | Talladega Nights: The Ballad of Ricky Bobby | Talladega Nights: The Ballad of Ricky Bobby | McKay, Adam                           | Adam McKay            | tt0415306 |
| 1746219219 | 1979 | 1979 | Love at First Bite                          | Love at First Bite                          | Dragoti, Stan                         | Stan Dragoti          | tt0079489 |
| 1746578064 | 1935 | 1935 | Law Beyond the Range                        | Law Beyond the Range                        | Beebe, Ford                           | Ford Beebe            | tt0026611 |
| 1746577881 | 1935 | 1935 | Hooray for Love                             | Hooray for Love                             | Lang, Walter                          | Walter Lang           | tt0026491 |
| 1746473943 | 1946 | 1946 | My Darling Clementine                       | My Darling Clementine                       | Ford, John                            | John Ford             | tt0038762 |
| 1746410535 | 1987 | 1987 | Like Father Like Son                        | Like Father Like Son                        | Daniel, Rod                           | Rod Daniel            | tt0093418 |
| 1746569749 | 1954 | 1954 | Brigadoon                                   | Brigadoon                                   | Minnelli, Vincente                    | Vincente Minnelli     | tt0046807 |
| 1746582812 | 1936 | 1936 | The Leavenworth Case                        | The Leavenworth Case                        | Collins, Lewis D.                     | Lewis D. Collins      | tt0027878 |
| 1746209097 | 1966 | 1966 | Follow Me, Boys!                            | Follow Me, Boys!                            | Tokar, Norman                         | Norman Tokar          | tt0060420 |
| 1746435545 | 1943 | 1943 | How's About It?                             | How's About It?                             | Kenton, Erle C.                       | Erle C. Kenton        | tt0036021 |
| 1769970624 | 1968 | 1968 | The Muthers                                 | The Muthers                                 |                                       | Donald A. Davis       | tt0144371 |
| 1746272146 | 1966 | 1966 | The Fat Spy                                 | The Fat Spy                                 | Cates, Joseph                         | Joseph Cates          | tt0059171 |
| 1746566227 | 1958 | 1958 | The Big Beat                                | The Big Beat                                | Cowan, Will                           | Will Cowan            | tt0051410 |
| 1746554761 | 1964 | 1963 | Lust for Ecstasy                            | Lust for Ecstasy                            | Kuchar, George; Kuchar, Mike          | George Kuchar         | tt0252659 |
| 1746420870 | 1996 | 1996 | Curdled                                     | Curdled                                     | Braddock, Reb                         | Reb Braddock          | tt0115994 |
| 1769971172 | 1969 | 1969 | She Came on the Bus                         | She Came on the Bus                         | Ledger, Curt                          | Curt Ledger           | tt0064972 |
| 1746580504 | 1935 | 1935 | Hold 'Em Yale                               | Hold 'Em Yale                               | Lanfield, Sidney                      | Sidney Lanfield       | tt0026480 |
| 1746454267 | 1941 | 1941 | Here Comes Mr. Jordan                       | Here Comes Mr. Jordan                       | Hall, Alexander                       | Alexander Hall        | tt0033712 |
| 1746570822 | 1934 | 1934 | Glamour                                     | Glamour                                     | Wylar, William                        | William Wylar         | tt0025181 |
| 1746580415 | 1935 | 1935 | Reckless                                    | Reckless                                    | Fleming, Victor                       | Victor Fleming        | tt0026914 |
| 1746577856 | 1935 | 1935 | The Hawk                                    | The Hawk                                    | Dmytryk, Edward                       | Edward Dmytryk        | tt0026456 |
| 1746582905 | 1938 | 1938 | Sing You Sinners                            | Sing, You Sinners                           | Ruggles, Wesley                       | Wesley Ruggles        | tt0030752 |
| 1746553239 | 1963 | 1963 | Diary of a Madman                           | Diary of a Madman                           | Le Borg, Reginald                     | Reginald Le Borg      | tt0056993 |
| 1746501373 | 1916 | 1916 | The Chain Invisible                         | The Chain Invisible                         | Powell, Frank E.                      | Frank Powell          | tt0160125 |
| 1746574124 | 1957 | 1957 | Battle Hymn                                 | Battle Hymn                                 | Sirk, Douglas                         | Douglas Sirk          | tt0050171 |
| 1746418690 | 1940 | 1940 | Street of Memories                          | Street of Memories                          | Traube, Shepard                       | Shepard Traube        | tt0033109 |
| 1746504055 | 1918 | 1918 | The Cast-Off                                | The Cast Off                                | West, Raymond B.                      | Raymond B. West       | tt0184331 |
| 1746584360 | 1937 | 1937 | Big Town Girl                               | Big Town Girl                               | Werker, Alfred                        | Alfred L. Werker      | tt0028631 |
| 1746578004 | 1936 | 1936 | Men of the Plains                           | Men of the Plains                           | Hill, Robert                          | Robert F. Hill        | tt0027956 |
| 1745359352 | 2003 | 2003 | A Guy Thing                                 | A Guy Thing                                 | Koch, Chris                           | Chris Koch            | tt0295289 |
| 1746566110 | 1955 | 1954 | The Bridges at Toko-Ri                      | The Bridges at Toko Ri                      | Robson, Mark                          | Mark Robson           | tt0046806 |
| 1746582321 | 1929 | 1929 | Flight                                      | Flight                                      | Capra, Frank R.                       | Frank Capra           | tt0019884 |
| 1746555967 | 1956 | 1956 | Indestructible Man                          | Indestructible Man                          | Pollexfen, Jack                       | Jack Pollexfen        | tt0049363 |
| 1746525100 | 1921 | 1921 | Life's Greatest Question                    | Life's Greatest Question                    | Revier, Harry                         | Harry Revier          | tt0012388 |
| 1769970479 | 1968 | 1968 | Someone                                     | Someone                                     | Rocco, Pat                            | Pat Rocco             | tt0258189 |
| 1746420959 | 1997 | 1997 | Fire Down Below                             | Fire Down Below                             | Alcala, Felix Enrique                 | Félix Enriquez Alcalá | tt0119123 |
| 1746524941 | 1923 | 1923 | The Westbound Limited                       | The West~Bound Limited                      | Johnson, Emory                        | Emory Johnson         | tt0348369 |
| 1746524000 | 1913 | 1913 | An Hour Before Dawn                         | An Hour Before Dawn                         | Dawley, J. Searle                     | J. Searle Dawley      | tt0002981 |
| 1746583559 | 1930 | 1930 | Outside the Law                             | Outside the Law                             | Browning, Tod                         | Tod Browning          | tt0021224 |

|            |      |      |                                  |                                     |                                |                       |           |
|------------|------|------|----------------------------------|-------------------------------------|--------------------------------|-----------------------|-----------|
| 1746580408 | 1937 | 1937 | Thoroughbreds Don't Cry          | Thoroughbreds Don't Cry             | Green, Alfred E.               | Alfred E. Green       | tt0029664 |
| 1746492582 | 1945 | 1946 | The Great Morgan                 | The Great Morgan                    | Perrin, Nat                    | Nat Perrin            | tt0038575 |
| 1769969412 | 1964 | 1964 | The Block                        | The Block                           | Orlando, Tony                  | Tony Orlando          | tt0211272 |
| 1746184384 | 1965 | 1965 | Return From the Ashes            | Return from the Ashes               | Thompson, J. Lee               | J. Lee Thompson       | tt0059649 |
| 1746569624 | 1954 | 1954 | Executive Suite                  | Executive Suite                     | Wise, Robert                   | Robert Wise           | tt0046963 |
| 1746465358 | 1946 | 1946 | My Dog Shep                      | My Dog Shep                         | Beebe, Ford                    | Ford Beebe            | tt0038763 |
| 1746582301 | 1931 | 1931 | Safe in Hell                     | Safe in Hell                        | Wellman, William A.            | William A. Wellman    | tt0022335 |
| 1746584043 | 1938 | 1938 | Sally, Irene and Mary            | Sally, Irene and Mary               | Seiter, William A.             | William A. Seiter     | tt0030712 |
| 1746532818 | 1916 | 1916 | The Cossack Whip                 | The Cossack Whip                    | Collins, John H.               | John H. Collins       | tt0006547 |
| 1746503805 | 1921 | 1921 | The Ranger and the Law           | The Ranger and the Law              | Kelly, Robert                  | Robert Kelly          | tt0012609 |
| 1746581244 | 1951 | 1951 | Ridin' the Outlaw Trail          | Ridin' the Outlaw Trail             | Sears, Fred F.                 | Fred F. Sears         | tt0043970 |
| 1745357596 | 2009 | 2009 | My Life in Ruins                 | My Life in Ruins                    | Petrie, Donald                 | Donald Petrie         | tt0865559 |
| 1746513794 | 1915 | 1915 | Trilby                           | Trilby                              | Tourneur, Maurice              | Maurice Tourneur      | tt0006182 |
| 1746583359 | 1928 | 1928 | Bare Knees                       | Bare Knees                          | Kenton, Erle C.                | Erle C. Kenton        | tt0018673 |
| 1746483471 | 1917 | 1917 | Red, White and Blue Blood        | Red, White and Blue Blood           | Brabin, Charles J.             | Charles Brabin        | tt0008504 |
| 1746508524 | 1924 | 1924 | Fast and Fearless                | Fast and Fearless                   | Thorpe, Richard                | Richard Thorpe        | tt0014878 |
| 1746578967 | 1951 | 1951 | The Great Missouri Raid          | The Great Missouri Raid             | Douglas, Gordon                | Gordon Douglas        | tt0043600 |
| 1746501784 | 1913 | 1913 | From Dusk to Dawn                | From Dusk to Dawn                   | Wolfe, Frank E.                | Frank E. Wolfe        | tt0002885 |
| 1745309714 | 2006 | 2006 | Nightmare Man                    | Nightmare Man                       | Kanefsky, Rolfe                | Rolfe Kanefsky        | tt0478216 |
| 1746578504 | 1963 | 1963 | Sin You Sinners                  | Sin You Sinners                     | Farrar, Anthony                | Anthony Farrar        | tt0055450 |
| 1745340982 | 2001 | 2001 | From Hell                        | From Hell                           | Hughes, Allen ; Hughes, Albert | Albert Hughes         | tt0120681 |
| 1746235023 | 1972 | 1972 | 1776                             | 1776                                | Hunt, Peter H.                 | Peter H. Hunt         | tt0068156 |
| 1746533016 | 1927 | 1927 | The Cat and the Canary           | Fat and the Canary                  | Leni, Paul                     |                       | tt1027041 |
| 1746512190 | 1927 | 1927 | Closed Gates                     | Closed Gates                        | Rosen, Phil                    | Phil Rosen            | tt0017760 |
| 1746576619 | 1932 | 1932 | The Big Broadcast                | The Big Broadcast                   | Tuttle, Frank                  | Frank Tuttle          | tt0022675 |
| 1746515380 | 1918 | 1918 | The Heart of Rachael             | The Heart of Rachael                | Hickman, Howard                | Howard C. Hickman     | tt0184555 |
| 1746233023 | 1969 | 1969 | A Boy ... a Girl                 | A Boy... a Girl                     | Derek, John                    | John Derek            | tt0173689 |
| 1746577692 | 1933 | 1933 | Cocktail Hour                    | Cocktail Hour                       | Schertzinger, Victor           | Victor Schertzinger   | tt0023897 |
| 1746437968 | 1943 | 1943 | Never a Dull Moment              | Never a Dull Moment                 | Lilley, Edward                 | Edward C. Lilley      | tt0036200 |
| 1746567986 | 1952 | 1952 | Steel Town                       | Steel Town                          | Sherman, George                | George Sherman        | tt0045189 |
| 1746566358 | 1953 | 1953 | Savage Mutiny                    | Savage Mutiny                       | Bennet, Spencer G.             | Spencer Gordon Bennet | tt0046276 |
| 1746504209 | 1920 | 1920 | The Round-Up                     | The Round Up                        | Melford, George H.             | George Melford        | tt0011647 |
| 1746282287 | 1980 | 1980 | Oh Heavenly Dog                  | Oh Heavenly Dog                     | Camp, Joe                      | Joe Camp              | tt0081269 |
| 1745373429 | 2002 | 2002 | Gangs of New York                | Gangs of New York                   | Scorsese, Martin               | Martin Scorsese       | tt0217505 |
| 1746503704 | 1922 | 1922 | Watch Him Step                   | Watch Him Step                      | Nelson, Jack                   | Jack Nelson           | tt0177357 |
| 1745374747 | 2002 | 2002 | Jackass the Movie                | Jackass: The Movie                  | Tremaine, Jeff                 | Jeff Tremaine         | tt0322802 |
| 1769970074 | 1912 | 1912 | The Heart of a Tramp             | The Heart of a Tramp                |                                |                       | tt0405008 |
| 1746569615 | 1956 | 1956 | It Conquered the World           | It Conquered the World              | Corman, Roger                  | Roger Corman          | tt0049370 |
| 1746554658 | 1964 | 1964 | Tarzan and Jane Regained Sort Of | Tarzan and Jane Regained... Sort of | Warhol, Andy                   | Andy Warhol           | tt0244833 |
| 1746495837 | 1917 | 1917 | Like Wildfire                    | Like Wildfire                       | Paton, Stuart                  | Stuart Paton          | tt0008187 |
| 1746185907 | 1967 | 1967 | White Lightnin' Road             | White Lightnin' Road                | Ormond, Ron                    | Ron Ormond            | tt0059907 |
| 1746424203 | 1942 | 1942 | Down Texas Way                   | Down Texas Way                      | Bretherton, Howard P.          | Howard Bretherton     | tt0034677 |
| 1746524677 | 1916 | 1916 | The Foundling                    | The Foundling                       | O'Brien, John D.               | John B. O'Brien       | tt0006699 |
| 1746584563 | 1929 | 1929 | High Voltage                     | High Voltage                        | Higgin, Howard                 | Howard Higgin         | tt0019983 |
| 1746235416 | 1977 | 1977 | The Deep                         | The Deep                            | Yates, Peter                   | Peter Yates           | tt0075925 |
| 1746475653 | 1946 | 1946 | Till the End of Time             | Till the End of Time                | Dmytryk, Edward                | Edward Dmytryk        | tt0039036 |
| 1746453512 | 1941 | 1941 | The Lone Rider Crosses the Rio   | The Lone Rider Crosses the Rio      | Newfield, Sam                  | Sam Newfield          | tt0033842 |
| 1746524517 | 1923 | 1923 | Breaking Into Society            | Breaking Into Society               | Stromberg, Hunt                | Hunt Stromberg        | tt0013889 |
| 1746570051 | 1934 | 1934 | Dancing Man                      | Dancing Man                         | Ray, Albert                    | Albert Ray            | tt0025030 |
| 1746503832 | 1922 | 1922 | Oliver Twist                     | Oliver Twist                        | Lloyd, Frank                   | Frank Lloyd           | tt0013450 |
| 1746500434 | 1926 | 1926 | Her Own Story                    | Her Own Story                       | Ford, Francis                  | Francis Ford          | tt0327858 |
| 1746500076 | 1924 | 1924 | The Bandolero                    | The Bandolero                       | Terriss, Tom                   | Tom Terriss           | tt0014695 |
| 1746420253 | 1992 | 1992 | Laws of Gravity                  | Laws of Gravity                     | Gomez, Nick                    | Nick Gomez            | tt0104693 |
| 1746218920 | 1972 | 1972 | The Getaway                      | The Getaway                         | Peckinpah, Sam                 | Sam Peckinpah         | tt0068638 |
| 1746520841 | 1949 | 1949 | I Cheated the Law!               | I Cheated the Law                   | Cahn, Edward L.                | Edward L. Cahn        | tt0041494 |
| 1746566337 | 1958 | 1958 | Island Women                     | Island Women                        | Berke, William                 | William Berke         | tt0122119 |
| 1746575004 | 1933 | 1933 | Headline Shooter                 | Headline Shooter                    | Brower, Otto                   | Otto Brower           | tt0024097 |

|            |      |      |                             |                             |                      |                       |           |
|------------|------|------|-----------------------------|-----------------------------|----------------------|-----------------------|-----------|
| 1745373410 | 2008 | 2008 | The Wackness                | The Wackness                | Levine, Jonathan     | Jonathan Levine       | tt1082886 |
| 1746500142 | 1949 | 1949 | Master Minds                | Master Minds                | Yarbrough, Jean      | Jean Yarbrough        | tt0041644 |
| 1746497258 | 1919 | 1919 | Human Desire                | Human Desire                | North, Wilfrid       | Wilfrid North         | tt0010276 |
| 1746566737 | 1932 | 1932 | Virgins of Bali             | Virgins of Bali             |                      | Deane H. Dickason     | tt1268922 |
| 1746438152 | 1942 | 1942 | Baby Face Morgan            | Baby Face Morgan            | Dreifuss, Arthur     | Arthur Dreifuss       | tt0034486 |
| 1746503459 | 1921 | 1921 | Ashamed of Parents          | Ashamed of Parents          | Plympton, Horace G.  | Horace G. Plympton    | tt0011933 |
| 1746577277 | 1962 | 1962 | 13 West Street              | 13 West Street              | Leacock, Philip      | Philip Leacock        | tt0055718 |
| 1746584256 | 1935 | 1935 | Million Dollar Haul         | Million Dollar Haul         | Herman, Albert       | Albert Herman         | tt0312963 |
| 1746515000 | 1923 | 1923 | Canyon of the Fools         | Canyon of the Fools         | Paul, Val            | Val Paul              | tt0013911 |
| 1746584159 | 1940 | 1940 | My Little Chickadee         | My Little Chickadee         | Cline, Edward F.     | Edward F. Cline       | tt0032828 |
| 1746497483 | 1920 | 1920 | Unseen Forces               | Unseen Forces               | Franklin, Sidney A.  | Sidney Franklin       | tt0157139 |
| 1746492210 | 1946 | 1946 | The Dark Horse              | The Dark Horse              | Jason, Will          | Will Jason            | tt0038454 |
| 1746454051 | 1942 | 1942 | Henry and Dizzy             | Henry and Dizzy             | Bennett, Hugh        | Hugh Bennett          | tt0034844 |
| 1746573923 | 1957 | 1957 | The Strange One             | The Strange One             | Garfein, Jack        | Jack Garfein          | tt0051019 |
| 1746583079 | 1937 | 1937 | Sea Devils                  | Sea Devils                  | Stoloff, Ben         | Benjamin Stoloff      | tt0029527 |
| 1746566214 | 1955 | 1955 | The Last Command            | The Last Command            | Lloyd, Frank         | Frank Lloyd           | tt0048287 |
| 1746436649 | 1941 | 1941 | Hello Sucker                | Hello, Sucker               | Cline, Edward        | Edward F. Cline       | tt0033703 |
| 1745373919 | 2002 | 2002 | Family Fundamentals         | Family Fundamentals         | Dong, Arthur         | Arthur Dong           | tt0303334 |
| 1746454022 | 1945 | 1944 | The Fighting Lady           | The Fighting Lady           |                      | Edward Steichen       | tt0036823 |
| 1746580568 | 1938 | 1938 | Spirit of Youth             | Spirit of Youth             | Fraser, Harry        | Harry L. Fraser       | tt0030781 |
| 1746584486 | 1930 | 1930 | Born Reckless               | Born Reckless               | Ford, John           | Andrew Bennison       | tt0020702 |
| 1746465370 | 1945 | 1945 | The Enchanted Cottage       | The Enchanted Cottage       | Cromwell, John       | John Cromwell         | tt0037671 |
| 1746581739 | 1951 | 1951 | Rhythm Inn                  | Rhythm Inn                  | Landres, Paul        | Paul Landres          | tt0224010 |
| 1746583910 | 1930 | 1930 | Under Montana Skies         | Under Montana Skies         | Thorpe, Richard      | Richard Thorpe        | tt0021500 |
| 1746512629 | 1915 | 1915 | Gladiola                    | Gladiola                    | Collins, John H.     | John H. Collins       | tt0005396 |
| 1746514657 | 1915 | 1915 | Snobs                       | Snobs                       | Apfel, Oscar         | Oscar Apfel           | tt0006060 |
| 1746523284 | 1916 | 1916 | Tapped Wires                | Tapped Wires                | Davis, James         | J. Gunnis Davis       | tt1534512 |
| 1746420145 | 1986 | 1986 | F/X                         | F/X                         | Mandel, Robert       | Robert Mandel         | tt0089118 |
| 1746582133 | 1928 | 1928 | Phantom of the Range        | Phantom of the Range        | Dugan, James         | James Dugan           | tt0019270 |
| 1746438623 | 1943 | 1943 | Edge of Darkness            | Edge of Darkness            | Milestone, Lewis     | Lewis Milestone       | tt0034694 |
| 1746567801 | 1933 | 1933 | The Song of Songs           | The Song of Songs           | Mamoulian, Rouben    | Rouben Mamoulian      | tt0024598 |
| 1746582867 | 1937 | 1937 | Big City                    | Big City                    | Borzage, Frank       | Frank Borzage         | tt0028628 |
| 1746577023 | 1960 | 1960 | The Girl in Lovers Lane     | The Girl in Lovers Lane     | Rondeau, Charles R.  | Charles R. Rondeau    | tt0052849 |
| 1746454072 | 1941 | 1941 | Western Union               | Western Union               | Lang, Fritz          | Fritz Lang            | tt0034384 |
| 1746501616 | 1915 | 1915 | The Secret Sin              | The Secret Sin              | Reicher, Frank       | Frank Reicher         | tt0006020 |
| 1746532739 | 1914 | 1914 | The Better Man              | The Better Man              |                      | William Powers        | tt0003677 |
| 1746581770 | 1928 | 1928 | Trial Marriage              | Trial Marriage              | Curran, William      | William Hughes Curran | tt0174280 |
| 1746491843 | 1948 | 1947 | Secret Beyond the Door      | Secret Beyond the Door...   | Lang, Fritz          | Fritz Lang            | tt0040766 |
| 1746504011 | 1920 | 1920 | The Luck of Geraldine Laird | The Luck of Geraldine Laird | Sloman, Edward       | Edward Sloman         | tt0011420 |
| 1746580365 | 1937 | 1937 | Meet the Boyfriend          | Meet the Boy Friend         | Staub, Ralph         | Ralph Staub           | tt0029223 |
| 1769969463 | 1911 | 1911 | The Lonely Range            | The Lonely Range            |                      | Allan Dwan            | tt0492158 |
| 1746585251 | 1930 | 1930 | The Oklahoma Sheriff        | The Oklahoma Sheriff        | McGowan, J. P.       | J.P. McGowan          | tt0145178 |
| 1746583809 | 1929 | 1929 | The Racketeer               | The Racketeer               | Higgin, Howard       | Howard Higgin         | tt0020305 |
| 1746582014 | 1929 | 1929 | The Sacred Flame            | The Sacred Flame            | Mayo, Archie L.      | Archie Mayo           | tt0020355 |
| 1746512081 | 1927 | 1927 | Hidden Aces                 | Hidden Aces                 | Mitchell, Howard     | Howard M. Mitchell    | tt0017990 |
| 1746465155 | 1946 | 1946 | Crime of the Century        | Crime of the Century        | Ford, Philip         | Philip Ford           | tt0038431 |
| 1746424235 | 1941 | 1942 | Small Town Deb              | Small Town Deb              | Schuster, Harold     | Harold D. Schuster    | tt0034202 |
| 1746508584 | 1926 | 1926 | Western Pluck               | Western Pluck               | Vale, Travers        | Travers Vale          | tt0017536 |
| 1746433735 | 1997 | 1997 | Inventing the Abbotts       | Inventing the Abbotts       | O'Connor, Pat        | Pat O'Connor          | tt0119381 |
| 1746583185 | 1929 | 1929 | True Heaven                 | True Heaven                 | Tinling, James       | James Tinling         | tt0020520 |
| 1746567957 | 1952 | 1952 | The Greatest Show on Earth  | The Greatest Show on Earth  | DeMille, Cecil B.    | Cecil B. DeMille      | tt0044672 |
| 1746508469 | 1923 | 1923 | Scaramouche                 | Scaramouche                 | Ingram, Rex          | Rex Ingram            | tt0014440 |
| 1746235227 | 1976 | 1976 | Rocky                       | Rocky                       | Avildsen, John G.    | John G. Avildsen      | tt0075148 |
| 1746218751 | 1973 | 1973 | Sssssss                     | Sssssss                     | Kowalski, Bernard L. | Bernard L. Kowalski   | tt0070622 |
| 1746545311 | 1940 | 1940 | The Grapes of Wrath         | The Grapes of Wrath         | Ford, John           | John Ford             | tt0032551 |
| 1746561342 | 1954 | 1954 | Johnny Dark                 | Johnny Dark                 | Sherman, George      | George Sherman        | tt0047135 |
| 1746523545 | 1915 | 1915 | Out of the Darkness         | Out of the Darkness         | Melford, George      | George Melford        | tt0005847 |

|            |      |      |                             |                             |                                       |                        |           |
|------------|------|------|-----------------------------|-----------------------------|---------------------------------------|------------------------|-----------|
| 1746454095 | 1943 | 1943 | Cowboy in Manhattan         | Cowboy in Manhattan         | Woodruff, Frank                       | Frank Woodruff         | tt0035761 |
| 1746454026 | 1944 | 1943 | Yellow Canary               | Yellow Canary               | Wilcox, Herbert                       | Herbert Wilcox         | tt0036549 |
| 1746585123 | 1929 | 1929 | Synthetic Sin               | Synthetic Sin               | Seiter, William A.                    | William A. Seiter      | tt0020471 |
| 1746583627 | 1929 | 1929 | Wall Street                 | Wall Street                 | Neill, R. William                     | Roy William Neill      | tt0020564 |
| 1746514771 | 1914 | 1914 | La Belle Russe              | La Belle Russe              | Hanley, William J.                    | William J. Hanley      | tt0003672 |
| 1746465246 | 1946 | 1946 | Smooth as Silk              | Smooth as Silk              | Barton, Charles                       | Charles Barton         | tt0038956 |
| 1746574184 | 1959 | 1959 | The Young Captives          | The Young Captives          | Kershner, Irvin                       | Irvin Kershner         | tt0053460 |
| 1746503447 | 1922 | 1922 | Turn to the Right           | Turn to the Right           | Ingram, Rex                           | Rex Ingram             | tt0013716 |
| 1746582735 | 1938 | 1938 | Strange Faces               | Strange Faces               | Taggart, Errol                        | Errol Taggart          | tt0030804 |
| 1746504073 | 1919 | 1919 | Help! Help! Police!         | Help! Help! Police!         | Dillon, Edward                        | Edward Dillon          | tt0010236 |
| 1746424053 | 1941 | 1941 | Man Hunt                    | Man Hunt                    | Lang, Fritz                           | Fritz Lang             | tt0033873 |
| 1746453542 | 1942 | 1942 | The Fleet's In              | The Fleet's In              | Schertzinger, Victor                  | Victor Schertzinger    | tt0034736 |
| 1745293664 | 2007 | 2007 | Look                        | Look                        | Rifkin, Adam                          | Pericles Lewnes        | tt1155062 |
| 1746503678 | 1922 | 1922 | A Tailor Made Man           | A Tailor Made Man           | De Grasse, Joseph                     | Joseph De Grasse       | tt0013654 |
| 1746233693 | 1967 | 1967 | The Happening               | The Happening               | Silverstein, Elliot                   | Elliot Silverstein     | tt0061748 |
| 1746503321 | 1922 | 1922 | Riders of the Law           | Riders of the Law           | Bradbury, Robert North                | Robert N. Bradbury     | tt0265646 |
| 1746503851 | 1920 | 1920 | White Youth                 | White Youth                 | Dawn, Norman                          | Norman Dawn            | tt0011863 |
| 1746572195 | 1932 | 1932 | Shanghai Express            | Shanghai Express            | Sternberg, Josef von                  | Josef von Sternberg    | tt0023458 |
| 1746584507 | 1930 | 1930 | Kismet                      | Kismet                      | Dillon, John Francis                  | John Francis Dillon    | tt0021029 |
| 1745372812 | 2010 | 2010 | Scott Pilgrim vs. The World | Scott Pilgrim vs. the World | Wright, Edgar                         | Edgar Wright           | tt0446029 |
| 1746501577 | 1922 | 1922 | The Ghost Breaker           | The Ghost Breaker           | Green, Alfred E.                      | Alfred E. Green        | tt0013170 |
| 1746567601 | 1932 | 1932 | Down to Earth               | Down to Earth               | Butler, David                         | David Butler           | tt0022833 |
| 1746584379 | 1936 | 1936 | Strike Me Pink              | Strike Me Pink              | Taugo, Norman                         | Norman Taurog          | tt0028321 |
| 1746507575 | 1925 | 1925 | Forty Winks                 | Forty Winks                 | Urson, Frank; Iribe, Paul             | Paul Iribe             | tt0015835 |
| 1746561468 | 1932 | 1932 | Hotel Continental           | Hotel Continental           | Cabanne, Christy                      | Christy Cabanne        | tt0023030 |
| 1746561906 | 1956 | 1956 | Flame of the Islands        | Flame of the Islands        | Ludwig, Edward                        | Edward Ludwig          | tt0048079 |
| 1746454628 | 1941 | 1940 | Four Shall Die              | Four Shall Die              | Popkin, Leo C.                        | William Beaudine       | tt0032351 |
| 1746532841 | 1927 | 1927 | The Yankee Clipper          | The Yankee Clipper          | Julian, Rupert                        | Rupert Julian          | tt0018601 |
| 1746561952 | 1954 | 1954 | Men of the Fighting Lady    | Men of the Fighting Lady    | Marton, Andrew                        | Andrew Marton          | tt0047230 |
| 1746570380 | 1952 | 1952 | Horizons West               | Horizons West               | Boetticher, Budd                      | Budd Boetticher        | tt0044722 |
| 1746513783 | 1916 | 1916 | The Crisis                  | The Crisis                  | Campbell, Colin                       | Colin Campbell         | tt0006557 |
| 1746197984 | 1970 | 1970 | Hercules in New York        | Hercules in New York        | Seidelman, Arthur A.                  | Arthur Allan Seidelman | tt0065832 |
| 1746571123 | 1934 | 1934 | The Gay Divorcee            | The Gay Divorcee            | Sandrich, Mark                        | Mark Sandrich          | tt0025164 |
| 1746578882 | 1951 | 1951 | The Basketball Fix          | The Basketball Fix          | Feist, Felix                          | Felix E. Feist         | tt0043320 |
| 1746570382 | 1934 | 1934 | Monte Carlo Nights          | Monte Carlo Nights          | Nigh, William                         | William Nigh           | tt0025514 |
| 1746419924 | 1988 | 1988 | Dominick and Eugene         | Dominick and Eugene         | Young, Robert M.                      | Robert M. Young        | tt0095050 |
| 1746502564 | 1916 | 1916 | The Habit of Happiness      | The Habit of Happiness      | Dwan, Allan                           | Allan Dwan             | tt0006751 |
| 1746250392 | 1976 | 1976 | Marathon Man                | Marathon Man                | Schlesinger, John                     | John Schlesinger       | tt0074860 |
| 1746584008 | 1935 | 1935 | College Scandal             | College Scandal             | Nugent, Elliott                       | Elliott Nugent         | tt0026225 |
| 1746410597 | 1986 | 1986 | Little Shop of Horrors      | Little Shop of Horrors      | Oz, Frank                             | Frank Oz               | tt0091419 |
| 1746234803 | 1966 | 1966 | Lost Command                | Lost Command                | Robson, Mark                          | Mark Robson            | tt0060637 |
| 1746211055 | 1970 | 1970 | The Dunwich Horror          | The Dunwich Horror          | Haller, Daniel                        | Daniel Haller          | tt0065669 |
| 1746582604 | 1936 | 1936 | Public Enemy's Wife         | Public Enemy's Wife         | Grinde, Nick                          | Nick Grinde            | tt0028144 |
| 1746464870 | 1942 | 1942 | Jail House Blues            | Jail House Blues            | Rogell, Albert S.                     | Albert S. Rogell       | tt0034911 |
| 1746567756 | 1934 | 1934 | Twisted Rails               | Twisted Rails               | Herman, Albert                        | Albert Herman          | tt0202640 |
| 1746208247 | 1967 | 1967 | Gunn                        | Gunn                        | Edwards, Blake                        | Blake Edwards          | tt0061739 |
| 1746499993 | 1948 | 1948 | The Hawk of Powder River    | The Hawk of Powder River    | Taylor, Ray                           | Ray Taylor             | tt0179209 |
| 1746501246 | 1915 | 1915 | Don Caesar De Bazan         | Don Caesar de Bazan         | Vignola, Robert G.                    | Robert G. Vignola      | tt0005208 |
| 1746569818 | 1954 | 1954 | Operation Manhunt           | Operation Manhunt           | Alexander, Jack                       | Jack Alexander         | tt0254632 |
| 1746509243 | 1924 | 1924 | When a Girl Loves           | When a Girl Loves           | Halperin, Victor Hugo; Wallace, C. R. | Victor Halperin        | tt0015486 |
| 1746516462 | 1920 | 1920 | 39 East                     | 39 East                     | Robertson, John S.                    | John S. Robertson      | tt0010945 |
| 1746583476 | 1950 | 1950 | Pygmy Island                | Pygmy Island                | Berke, William                        | William Berke          | tt0042865 |
| 1746562470 | 1957 | 1957 | Monster from Green Hell     | Monster from Green Hell     | Crane, Kenneth G.                     | Kenneth G. Crane       | tt0050723 |
| 1746210470 | 1970 | 1970 | Jenny                       | Jenny                       | Bloomfield, George                    | George Bloomfield      | tt0064510 |
| 1746498283 | 1917 | 1916 | His Mother's Boy            | His Mother's Boy            | Schertzinger, Victor L.               | Fred Kelsey            | tt0335153 |
| 1746508394 | 1925 | 1925 | Man and Maid                | Man and Maid                | Schertzinger, Victor                  | Victor Schertzinger    | tt0016079 |
| 1746582349 | 1950 | 1950 | Timber Fury                 | Timber Fury                 | Ray, Bernard B.                       | Bernard B. Ray         | tt0043049 |

|            |      |      |                                |                                |                          |                   |           |
|------------|------|------|--------------------------------|--------------------------------|--------------------------|-------------------|-----------|
| 1746514313 | 1923 | 1923 | The Ne'er-Do-Well              | The Ne'er Do Well              | Green, Alfred E.         | Alfred E. Green   | tt0014306 |
| 1746454772 | 1997 | 1997 | Titanic                        | Titanic                        | Cameron, James           | James Cameron     | tt0120338 |
| 1745373794 | 2002 | 2002 | Death to Smoochy               | Death to Smoochy               | DeVito, Danny            | Danny DeVito      | tt0266452 |
| 1746514536 | 1915 | 1915 | The Despoiler                  | The Despoiler                  | Barker, Reginald         | Reginald Barker   | tt0005187 |
| 1745395619 | 2010 | 2010 | The Social Network             | The Social Network             | Fincher, David           | David Fincher     | tt1285016 |
| 1746569556 | 1954 | 1954 | The Black Pirates              | The Black Pirates              | Miner, Allen H.          | Allen H. Miner    | tt0046787 |
| 1746577815 | 1935 | 1935 | The Wanderer of the Wasteland  | Wanderer of the Wasteland      | Lovering, Otho           | Otho Lovering     | tt0027182 |
| 1746584157 | 1935 | 1935 | Two Sinners                    | Two Sinners                    | Lubin, Arthur            | Arthur Lubin      | tt0027146 |
| 1746574758 | 1934 | 1934 | Cheaters                       | Cheaters                       | Rosen, Phil              | Phil Rosen        | tt0024971 |
| 1746503598 | 1920 | 1920 | Sweet Lavender                 | Sweet Lavender                 | Powell, Paul             | Paul Powell       | tt0011745 |
| 1746582652 | 1937 | 1937 | Under the Red Robe             | Under the Red Robe             | Seastrom, Victor         | Victor Sjöström   | tt0029712 |
| 1746515580 | 1920 | 1920 | The False Road                 | The False Road                 | Niblo, Fred              | Fred Niblo        | tt0011170 |
| 1746474466 | 1945 | 1945 | Trail to Vengeance             | Trail to Vengeance             | Fox, Wallace W.          | Wallace Fox       | tt0038186 |
| 1746580618 | 1937 | 1937 | Manhattan Merry-Go-Round       | Manhattan Merry Go Round       | Riesner, Charles F.      | Charles Reisner   | tt0029209 |
| 1745302261 | 2007 | 2007 | Dead Silence                   | Dead Silence                   | Wan, James               | James Wan         | tt0455760 |
| 1746475509 | 1945 | 1945 | Marshal of Laredo              | Marshal of Laredo              | Springsteen, R. G.       | R.G. Springsteen  | tt0037902 |
| 1746582870 | 1935 | 1935 | It's a Small World             | It's a Small World             | Cummings, Irving         | Irving Cummings   | tt0026539 |
| 1746408697 | 1985 | 1985 | Target                         | Target                         | Penn, Arthur             | Arthur Penn       | tt0090130 |
| 1746525069 | 1921 | 1921 | A Wife's Awakening             | A Wife's Awakening             | Gasnier, Louis           | Louis J. Gasnier  | tt0012848 |
| 1746438624 | 1941 | 1941 | Road Agent                     | Road Agent                     | Lamont, Charles          | Charles Lamont    | tt0034114 |
| 1746423753 | 1997 | 1997 | Commandments                   | Commandments                   | Taplitz, Daniel          | Daniel Taplitz    | tt0115927 |
| 1746574268 | 1958 | 1958 | White Wilderness               | White Wilderness               | Algar, James             | James Algar       | tt0052389 |
| 1746524419 | 1910 | 1910 | A Lucky Toothache              | A Lucky Toothache              | Powell, Frank            | Frank Powell      | tt0001298 |
| 1746574888 | 1935 | 1935 | Little Big Shot                | Little Big Shot                | Curtiz, Michael          | Michael Curtiz    | tt0026632 |
| 1746578612 | 1960 | 1960 | For the Love of Mike           | For the Love of Mike           | Sherman, George          | George Sherman    | tt0053831 |
| 1746569628 | 1953 | 1953 | Roman Holiday                  | Roman Holiday                  | Wyler, William           | William Wyler     | tt0046250 |
| 1746574723 | 1938 | 1938 | Bulldog Drummond in Africa     | Bulldog Drummond in Africa     | King, Louis              | Louis King        | tt0029951 |
| 1745342769 | 2002 | 2002 | Paid in Full                   | Paid in Full                   | Stone, Charles           | Charles Stone III | tt0259484 |
| 1746513712 | 1923 | 1923 | The Purple Highway             | The Purple Highway             | Kolker, Henry            | Henry Kolker      | tt0014384 |
| 1746532620 | 1916 | 1916 | The Abandonment                | The Abandonment                | MacDonald, Donald        | Donald MacDonald  | tt0006335 |
| 1746271831 | 1978 | 1978 | The Bad News Bears Go to Japan | The Bad News Bears Go to Japan | Berry, John              | John Berry        | tt0077199 |
| 1746580474 | 1938 | 1938 | Riders of the Black Hills      | Riders of the Black Hills      | Sherman, George          | George Sherman    | tt0030681 |
| 1746436658 | 1943 | 1943 | Leather Burners                | Leather Burners                | Henabery, Joseph E.      | Joseph Henabery   | tt0036103 |
| 1746272402 | 1966 | 1966 | The Appaloosa                  | The Appaloosa                  | Furie, Sidney J.         | Sidney J. Furie   | tt0060120 |
| 1746580594 | 1935 | 1935 | Forced Landing                 | Forced Landing                 | Brown, Melville          | Melville W. Brown | tt0026376 |
| 1746571355 | 1934 | 1934 | The Band Plays On              | The Band Plays On              | Mack, Russell            | Russell Mack      | tt0024862 |
| 1746584291 | 1939 | 1939 | Wuthering Heights              | Wuthering Heights              | Wyler, William           | William Wyler     | tt0032145 |
| 1746566137 | 1955 | 1955 | Good Morning, Miss Dove        | Good Morning, Miss Dove        | Koster, Henry            | Henry Koster      | tt0048130 |
| 1746509340 | 1926 | 1926 | Broadway Billy                 | Broadway Billy                 | Brown, Harry J.          | Harry Joe Brown   | tt0016681 |
| 1746533176 | 1915 | 1915 | A Daughter of the City         | A Daughter of the City         | Calvert, E. H.           | E.H. Calvert      | tt0005174 |
| 1746570463 | 1933 | 1933 | Lucky Devils                   | Lucky Devils                   | Ince, Ralph              | Ralph Ince        | tt0024276 |
| 1746410160 | 1986 | 1986 | The Hitcher                    | The Hitcher                    | Harmon, Robert           | Robert Harmon     | tt0091209 |
| 1746515806 | 1921 | 1921 | Love's Plaything               | Love's Plaything               | Coyle, Walter V.         | Walter V. Coyle   | tt0220625 |
| 1746514601 | 1916 | 1916 | A Corner in Cotton             | A Corner in Cotton             | Balshofer, Fred J.       | Fred J. Balshofer | tt0157485 |
| 1746500721 | 1925 | 1925 | Fear-Bound                     | Fear Bound                     | Nigh, Will               | William Nigh      | tt0015797 |
| 1746578013 | 1935 | 1935 | Calm Yourself                  | Calm Yourself                  | Seitz, George B.         | George B. Seitz   | tt0026166 |
| 1746583142 | 1940 | 1940 | Little Old New York            | Little Old New York            | King, Henry              | Henry King        | tt0032719 |
| 1746584924 | 1940 | 1940 | Those Were the Days!           | Those Were the Days!           | Reed, Jay Theodore       | Theodore Reed     | tt0033155 |
| 1746524686 | 1915 | 1915 | Samson                         | Samson                         | Lewis, Edgar             | Edgar Lewis       | tt0006002 |
| 1745342027 | 2001 | 2001 | Town & Country                 | Town & Country                 | Chelsom, Peter           | Peter Chelsom     | tt0141907 |
| 1746438312 | 1945 | 1945 | Blonde Ransom                  | Blonde Ransom                  | Beaudine, William        | William Beaudine  | tt0037546 |
| 1746513064 | 1923 | 1922 | The Prairie Mystery            | The Prairie Mystery            | Hall, George Edward      | George Edwardes   | tt0013508 |
| 1746577342 | 1961 | 1961 | Breakfast at Tiffany's         | Breakfast at Tiffany's         | Edwards, Blake           | Blake Edwards     | tt0054698 |
| 1745342446 | 2002 | 2001 | Kissing Jessica Stein          | Kissing Jessica Stein          | Herman-Wurmfeld, Charles | Charles Herman    | tt0264761 |
| 1746512588 | 1923 | 1923 | Ruggles of Red Gap             | Ruggles of Red Gap             | Cruze, James             | James Cruze       | tt0014423 |
| 1746484435 | 1917 | 1917 | Alias Mrs. Jessop              | Alias Mrs. Jessop              | Davis, William S.        | Will S. Davis     | tt0007621 |
| 1745309203 | 2007 | 2007 | The Mist                       | The Mist                       | Darabont, Frank          | Frank Darabont    | tt0884328 |

|                   |             |             |                                            |                                            |                                   |                       |                  |
|-------------------|-------------|-------------|--------------------------------------------|--------------------------------------------|-----------------------------------|-----------------------|------------------|
| 1746514814        | 1916        | 1916        | Stranded                                   | Stranded                                   | Ingraham, Lloyd                   | Will Louis            | tt0269917        |
| 1746486459        | 1917        | 1917        | The Bar Sinister                           | The Bar Sinister                           | Lewis, Edgar                      | Edgar Lewis           | tt0007677        |
| 1746577750        | 1937        | 1937        | Thunder Trail                              | Thunder Trail                              | Barton, Charles                   | Charles Barton        | tt0029669        |
| 1746464890        | 1941        | 1941        | The Smiling Ghost                          | The Smiling Ghost                          | Seiler, Lewis                     | Lewis Seiler          | tt0034204        |
| 1746502870        | 1916        | 1916        | The Selfish Woman                          | The Selfish Woman                          | Hopper, E. Mason; Melford, George | E. Mason Hopper       | tt0007322        |
| 1746515048        | 1917        | 1917        | The Pride of the Clan                      | The Pride of the Clan                      | Tourneur, Maurice                 | Maurice Tourneur      | tt0008458        |
| 1746467489        | 1917        | 1917        | Betsy's Burglar                            | Betsy's Burglar                            | Powell, Paul                      | Paul Powell           | tt0007699        |
| 1746555272        | 1954        | 1954        | Port of Hell                               | Port of Hell                               | Schuster, Harold                  | Harold D. Schuster    | tt0047359        |
| 1746523702        | 1915        | 1915        | The Millionaire Baby                       | The Millionaire Baby                       | Marston, Lawrence                 | Lawrence Marston      | tt0005746        |
| 1746585013        | 1940        | 1940        | I Was an Adventuress                       | I Was an Adventuress                       | Ratoff, Gregory                   | Gregory Ratoff        | tt0032620        |
| 1746234180        | 1967        | 1966        | The Drifter                                | The Drifter                                | Matter, Alex                      | Alex Matter           | tt0060347        |
| 1746565561        | 1932        | 1932        | The Last Man                               | The Last Man                               | Higgin, Howard                    | Howard Higgin         | tt0023116        |
| 1746584712        | 1928        | 1928        | Forbidden Grass                            | Forbidden Grass                            | Eldridge, E. M.                   | Evelyn Nicholas       | tt0132971        |
| 1746562455        | 1953        | 1953        | Walking My Baby Back Home                  | Walking My Baby Back Home                  | Bacon, Lloyd                      | Lloyd Bacon           | tt0046531        |
| 1746410530        | 1984        | 1984        | Heartbreakers                              | Heartbreakers                              | Roth, Bobby                       | Bobby Roth            | tt0087397        |
| 1746439090        | 1999        | 1999        | A Walk on the Moon                         | A Walk on the Moon                         | Goldwyn, Tony                     | Tony Goldwyn          | tt0120613        |
| 1746583978        | 1935        | 1935        | I Live for Love                            | I Live for Love                            | Berkeley, Busby                   | Busby Berkeley        | tt0026512        |
| 1745271947        | 2001        | 2001        | Antitrust                                  | Antitrust                                  | Howitt, Peter                     | Peter Howitt          | tt0218817        |
| 1746491767        | 1943        | 1943        | The Blocked Trail                          | The Blocked Trail                          | Clifton, Elmer                    | Elmer Clifton         | tt0035683        |
| 1746456198        | 1996        | 1996        | Fly Away Home                              | Fly Away Home                              | Ballard, Carroll                  | Carroll Ballard       | tt0116329        |
| 1769970732        | 1911        | 1911        | Cinderella                                 | Cinderella                                 | Nichols, George O.                | George Nichols        | tt0001545        |
| 1746583115        | 1938        | 1938        | Rebecca of Sunnybrook Farm                 | Rebecca of Sunnybrook Farm                 | Dwan, Allan                       | Allan Dwan            | tt0030657        |
| 1746504060        | 1918        | 1918        | Miss Mischief Maker                        | Miss Mischief Maker                        | MacDonald, Sherwood               | Sherwood MacDonald    | tt0009381        |
| 1746584253        | 1935        | 1935        | Miss Pacific Fleet                         | Miss Pacific Fleet                         | Enright, Ray                      | Ray Enright           | tt0026721        |
| 1746249982        | 1978        | 1978        | Invasion of the Body Snatchers             | Invasion of the Body Snatchers             | Kaufman, Philip                   | Philip Kaufman        | tt0077745        |
| 1746491876        | 1947        | 1947        | That's My Man                              | That's My Man                              | Borzage, Frank                    | Frank Borzage         | tt0039022        |
| 1746580949        | 1961        | 1961        | Eve and the Handyman                       | Eve and the Handyman                       | Meyer, Russ                       | Russ Meyer            | tt0054859        |
| 1746583836        | 1929        | 1929        | Dangerous Curves                           | Dangerous Curves                           | Mendes, Lothar                    | Lothar Mendes         | tt0019800        |
| 1746584275        | 1935        | 1935        | Kentucky Blue Streak                       | Kentucky Blue Streak                       | Johnson, Raymond K.               | Bernard B. Ray        | tt0026563        |
| 1746504535        | 1918        | 1918        | Shackled                                   | Shackled                                   | Barker, Reginald                  | Reginald Barker       | tt0009599        |
| 1746509205        | 1949        | 1949        | Slightly French                            | Slightly French                            | Sirk, Douglas                     | Douglas Sirk          | tt0041885        |
| <b>1746562358</b> | <b>1953</b> | <b>1953</b> | <b>Down Laredo Way</b>                     | <b>Down Laredo Way</b>                     | <b>Witney, William</b>            | <b>William Witney</b> | <b>tt0045703</b> |
| 1746532493        | 1927        | 1927        | Dearie                                     | Dearie                                     | Mayo, Archie                      | Archie Mayo           | tt0017795        |
| 1746550042        | 1955        | 1955        | Battle Cry                                 | Battle Cry                                 | Walsh, Raoul                      | Raoul Walsh           | tt0047860        |
| 1746208967        | 1968        | 1968        | Head                                       | Head                                       | Rafelson, Bob                     | Bob Rafelson          | tt0063049        |
| 1746492424        | 1948        | 1948        | An Innocent Affair                         | An Innocent Affair                         | Bacon, Lloyd                      | Lloyd Bacon           | tt0040473        |
| 1746581123        | 1961        | 1961        | Blueprint for Robbery                      | Blueprint for Robbery                      | Hopper, Jerry                     | Jerry Hopper          | tt0054693        |
| 1769970677        | 1968        | 1968        | Sugar Daddy                                | Sugar Daddy                                | Crane, Larry                      | Larry Crane           | tt0291497        |
| 1746466638        | 1917        | 1917        | The Crab                                   | The Crab                                   | Edwards, Walter                   | Walter Edwards        | tt0168613        |
| 1746393243        | 1988        | 1988        | Brain Damage                               | Brain Damage                               | Henenlotter, Frank                | Frank Henenlotter     | tt0094793        |
| 1746408465        | 1987        | 1987        | Some Kind of Wonderful                     | Some Kind of Wonderful                     | Deutch, Howard                    | Howard Deutch         | tt0094006        |
| 1746491775        | 1944        | 1944        | Summer Storm                               | Summer Storm                               | Sirk, Douglas                     | Douglas Sirk          | tt0037325        |
| 1746500497        | 1924        | 1924        | Being Respectable                          | Being Respectable                          | Rosen, Philip                     | Phil Rosen            | tt0014710        |
| 1746497065        | 1919        | 1919        | When Men Desire                            | When Men Desire                            | Edwards, J. Gordon                | J. Gordon Edwards     | tt0010876        |
| 1746514328        | 1914        | 1914        | Classmates                                 | Classmates                                 | Kirkwood, James                   | James Kirkwood        | tt0003777        |
| 1746584476        | 1930        | 1930        | Scarlet Pages                              | Scarlet Pages                              | Enright, Ray                      | Ray Enright           | tt0021337        |
| 1745373324        | 2008        | 2008        | Bedtime Stories                            | Bedtime Stories                            | Shankman, Adam                    | Adam Shankman         | tt0960731        |
| 1746525018        | 1919        | 1919        | The Woman Under Cover                      | The Woman Under Cover                      | Seigmann, George                  | George Siegmann       | tt0010914        |
| 1746464859        | 1944        | 1943        | The Spider Woman                           | The Spider Woman                           | Neill, Roy William                | Roy William Neill     | tt0037303        |
| 1746530671        | 1949        | 1949        | Mr. Soft Touch                             | Mr. Soft Touch                             | Levin, Henry; Douglas, Gordon     | Gordon Douglas        | tt0041663        |
| 1746509530        | 1926        | 1926        | Lone Hand Saunders                         | Lone Hand Saunders                         | Eason, B. Reeves                  | B. Reeves Eason       | tt0017076        |
| 1746514092        | 1914        | 1914        | A Fight for Freedom; or, Exiled to Siberia | A Fight for Freedom; Or, Exiled to Siberia |                                   |                       | tt0003957        |
| 1746577500        | 1933        | 1933        | Adorable                                   | Adorable                                   | Dieterle, Wilhelm                 | William Dieterle      | tt0023740        |
| 1746453798        | 1941        | 1941        | Mr. District Attorney in the Carter Case   | Mr. District Attorney in the Carter Case   | Vorhaus, Bernard                  | Bernard Vorhaus       | tt0035090        |
| 1746508051        | 1924        | 1924        | The Reckless Age                           | The Reckless Age                           | Pollard, Harry                    | Harry A. Pollard      | tt0015263        |
| 1746585039        | 1940        | 1940        | Rollin' Home to Texas                      | Rollin' Home to Texas                      | Herman, Al                        | Albert Herman         | tt0032997        |
| 1746500563        | 1927        | 1927        | The Swift Shadow                           | The Swift Shadow                           | Storm, Jerome                     | Jerome Storm          | tt0167433        |

|            |      |      |                                        |                                        |                      |                         |           |
|------------|------|------|----------------------------------------|----------------------------------------|----------------------|-------------------------|-----------|
| 1746439476 | 1941 | 1941 | Hurry, Charlie, Hurry                  | Hurry, Charlie, Hurry                  | Roberts, Charles E.  | Charles E. Roberts      | tt0033733 |
| 1746514943 | 1916 | 1916 | The Island of Surprise                 | The Island of Surprise                 | Scardon, Paul        | Paul Scardon            | tt0006873 |
| 1746409939 | 1985 | 1985 | Brewster's Millions                    | Brewster's Millions                    | Hill, Walter         | Walter Hill             | tt0088850 |
| 1746574428 | 1959 | 1959 | Tarzan, the Ape Man                    | Tarzan, the Ape Man                    | Newman, Joseph       | Joseph M. Newman        | tt0053335 |
| 1746465266 | 1947 | 1947 | Seven Were Saved                       | Seven Were Saved                       | Pine, William H.     | William H. Pine         | tt0039816 |
| 1746583428 | 1928 | 1928 | The Cameraman                          | The Cameraman                          | Sedgwick, Edward     | Edward Sedgwick         | tt0018742 |
| 1746572550 | 1932 | 1932 | No Greater Love                        | No Greater Love                        | Seiler, Lewis        | Lewis Seiler            | tt0023275 |
| 1746498273 | 1918 | 1918 | Heart of the Sunset                    | Heart of the Sunset                    | Powell, Frank        | Frank Powell            | tt0184556 |
| 1746569822 | 1959 | 1959 | Imitation of Life                      | Imitation of Life                      | Sirk, Douglas        | Douglas Sirk            | tt0052918 |
| 1746524414 | 1927 | 1927 | Hell Hounds of the Plains              | Hell Hounds of the Plains              | Wilson, Ben          | Jacques Jaccard         | tt0127583 |
| 1746394690 | 1986 | 1986 | Troll                                  | Troll                                  | Buechler, John Carl  | John Carl Buechler      | tt0092115 |
| 1746578898 | 1951 | 1951 | I Was a Communist for the F.B.I.       | I Was a Communist for the F.B.I.       | Douglas, Gordon      | Gordon Douglas          | tt0043665 |
| 1746575021 | 1936 | 1936 | Libeled Lady                           | Libeled Lady                           | Conway, Jack         | Jack Conway             | tt0027884 |
| 1746574059 | 1960 | 1960 | Because They're Young                  | Because They're Young                  | Wendkos, Paul        | Paul Wendkos            | tt0053641 |
| 1746566043 | 1954 | 1953 | Give a Girl a Break                    | Give a Girl a Break                    | Donen, Stanley       | Stanley Donen           | tt0045822 |
| 1769971188 | 1969 | 1969 | Submission                             | Submission                             | Savage, Allen        | Allen Savage            | tt0258997 |
| 1745357626 | 2008 | 2008 | The X-Files: I Want to Believe         | The X Files: I Want to Believe         | Carter, Chris        | Chris Carter            | tt0443701 |
| 1746520771 | 1949 | 1949 | The Mysterious Desperado               | The Mysterious Desperado               | Selander, Lesley     | Lesley Selander         | tt0041675 |
| 1746570878 | 1933 | 1933 | Wild Boys of the Road                  | Wild Boys of the Road                  | Wellman, William A.  | William A. Wellman      | tt0024772 |
| 1746584764 | 1930 | 1930 | War Nurse                              | War Nurse                              | Selwyn, Edgar        | Edgar Selwyn            | tt0021531 |
| 1746584726 | 1928 | 1928 | Crooks Can't Win                       | Crooks Can't Win                       | Arthur, George M.    | George M. Arthur        | tt0018805 |
| 1746216883 | 1968 | 1968 | Guns for San Sebastian                 | Guns for San Sebastian                 | Verneuil, Henri      | Henri Verneuil          | tt0062713 |
| 1746585180 | 1929 | 1929 | The Cohens and Kellys in Atlantic City | The Cohens and Kellys in Atlantic City | Craft, William James | William James Craft     | tt0019779 |
| 1746580915 | 1935 | 1935 | King Solomon of Broadway               | King Solomon of Broadway               | Crosland, Alan       | Alan Crosland           | tt0026570 |
| 1745294019 | 2007 | 2006 | Kurt Cobain About a Son                | Kurt Cobain About a Son                | Schnack, A. J.       | AJ Schnack              | tt0790769 |
| 1746513465 | 1923 | 1923 | Daddy                                  | Daddy                                  | Hopper, E. Mason     | E. Mason Hopper         | tt0013965 |
| 1746515675 | 1922 | 1922 | Timothy's Quest                        | Timothy's Quest                        | Olcott, Sidney       | Sidney Olcott           | tt0013682 |
| 1746483867 | 1919 | 1919 | His Father's Wife                      | His Father's Wife                      | Crane, Frank         | Frank Hall Crane        | tt0205129 |
| 1746410698 | 1993 | 1993 | Rookie of the Year                     | Rookie of the Year                     | Stern, Daniel        | Daniel Stern            | tt0107985 |
| 1746474535 | 1946 | 1946 | Tall, Tan and Terrific                 | Tall, Tan, and Terrific                | Pollard, Bud         | Bud Pollard             | tt0139634 |
| 1745359827 | 2010 | 2010 | Secretariat                            | Secretariat                            | Wallace, Randall     | Randall Wallace         | tt1028576 |
| 1746498687 | 1917 | 1917 | The Dazzling Miss Davison              | The Dazzling Miss Davison              | Powell, Frank        | Frank Powell            | tt0007843 |
| 1746408719 | 1985 | 1985 | Invasion U.S.A.                        | Invasion U.S.A.                        | Zito, Joseph         | Joseph Zito             | tt0089348 |
| 1746577204 | 1959 | 1959 | The Monster of Piedras Blancas         | The Monster of Piedras Blancas         | Berwick, Irvin       | Irvin Berwick           | tt0051947 |
| 1746502362 | 1916 | 1916 | Dulcie's Adventure                     | Dulcie's Adventure                     | Kirkwood, James      | James Kirkwood          | tt0125069 |
| 1746508997 | 1926 | 1926 | Doubling With Danger                   | Doubling with Danger                   | Dunlap, Scott R.     | Scott R. Dunlap         | tt0130634 |
| 1746503566 | 1918 | 1918 | For Sale                               | For Sale                               | Wright, Fred         | Fred E. Wright          | tt0009085 |
| 1746583896 | 1930 | 1930 | Crazy That Way                         | Crazy That Way                         | MacFadden, Hamilton  | Hamilton MacFadden      | tt0020797 |
| 1746543063 | 1916 | 1916 | Her Father's Gold                      | Her Father's Gold                      | Moore, W. Eugene     | Eugene Moore            | tt0157745 |
| 1746585470 | 1940 | 1940 | Florian                                | Florian                                | Marin, Edwin L.      | Edwin L. Marin          | tt0032479 |
| 1746574687 | 1936 | 1936 | White Fang                             | White Fang                             | Butler, David        | David Butler            | tt0028501 |
| 1746553597 | 1964 | 1964 | Lilith                                 | Lilith                                 | Rossen, Robert       | Robert Rossen           | tt0058294 |
| 1746474394 | 1945 | 1945 | How Doooo You Do!!!                    | How D0ooo You Do                       | Murphy, Ralph        | Ralph Murphy            | tt0037796 |
| 1746583594 | 1950 | 1950 | Rider from Tucson                      | Rider from Tucson                      | Selander, Lesley     | Lesley Selander         | tt0042891 |
| 1746393251 | 1981 | 1981 | Sharky's Machine                       | Sharky's Machine                       | Reynolds, Burt       | Burt Reynolds           | tt0083064 |
| 1746394422 | 1981 | 1981 | Halloween II                           | Halloween II                           | Rosenthal, Rick      | Rick Rosenthal          | tt0082495 |
| 1746561974 | 1953 | 1953 | The Maze                               | The Maze                               |                      | William Cameron Menzies | tt0046057 |
| 1746577222 | 1951 | 1950 | The Man Who Cheated Himself            | The Man Who Cheated Himself            | Feist, Felix E.      | Felix E. Feist          | tt0042707 |
| 1746464801 | 1944 | 1944 | It Happened Tomorrow                   | It Happened Tomorrow                   | Clair, René          | René Clair              | tt0036962 |
| 1746524335 | 1915 | 1915 | The Lily of Poverty Flat               | The Lily of Poverty Flat               | Middleton, George E. | George E. Middleton     | tt0005623 |
| 1746508594 | 1925 | 1925 | The Love Gamble                        | The Love Gamble                        | Le Saint, Edward     | Edward LeSaint          | tt0016042 |
| 1746524806 | 1916 | 1916 | Diplomacy                              | Diplomacy                              | Olcott, Sidney       | Sidney Olcott           | tt0006595 |
| 1746584600 | 1929 | 1930 | Midnight Daddies                       | Midnight Daddies                       | Sennett, Mack        | Mack Sennett            | tt0020169 |
| 1746516273 | 1921 | 1921 | Outlawed                               | Outlawed                               | Neitz, Alvin J.      | Alan James              | tt0145951 |
| 1746422916 | 2000 | 2000 | Lucky Numbers                          | Lucky Numbers                          | Ephron, Nora         | Nora Ephron             | tt0219952 |
| 1746582425 | 1935 | 1935 | The Outlaw Tamer                       | The Outlaw Tamer                       | McGowan, J. P.       | J.P. McGowan            | tt0025613 |
| 1746583897 | 1931 | 1931 | City Lights                            | City Lights                            | Chaplin, Charles     | Charles Chaplin         | tt0021749 |

|            |      |      |                                     |                                     |                              |                                     |           |
|------------|------|------|-------------------------------------|-------------------------------------|------------------------------|-------------------------------------|-----------|
| 1746475654 | 1947 | 1947 | Song of Love                        | Song of Love                        | Brown, Clarence              | Clarence Brown                      | tt0039850 |
| 1746583871 | 1928 | 1928 | The Four-Footed Ranger              | The Four Footed Ranger              | Paton, Stuart                | Stuart Paton                        | tt0018911 |
| 1746581369 | 1961 | 1961 | The Errand Boy                      | The Errand Boy                      | Lewis, Jerry                 | Jerry Lewis                         | tt0054853 |
| 1746394389 | 1984 | 1984 | 2010                                | 2010                                | Hyams, Peter                 | Peter Hyams                         | tt0086837 |
| 1746577970 | 1938 | 1938 | Angels with Dirty Faces             | Angels with Dirty Faces             | Curtiz, Michael              | Michael Curtiz                      | tt0029870 |
| 1746422597 | 1999 | 1999 | The Green Mile                      | The Green Mile                      | Darabont, Frank              | Frank Darabont                      | tt0120689 |
| 1746492501 | 1945 | 1945 | The Great John L.                   | The Great John L.                   | Tuttle, Frank                | Frank Tuttle                        | tt0037750 |
| 1746577729 | 1938 | 1938 | The Adventures of Marco Polo        | The Adventures of Marco Polo        | Mayo, Archie; Cromwell, John | Archie Mayo                         | tt0029842 |
| 1746419291 | 1940 | 1940 | The Captain Is a Lady               | The Captain Is a Lady               | Sinclair, Robert B.          | Robert B. Sinclair                  | tt0032305 |
| 1746512114 | 1927 | 1927 | The Haunted Ship                    | The Haunted Ship                    | Sheldon, Forrest K.          | Forrest Sheldon                     | tt0017969 |
| 1746437832 | 1942 | 1942 | White Cargo                         | White Cargo                         | Thorpe, Richard              | Richard Thorpe                      | tt0035553 |
| 1746422212 | 1994 | 1994 | 3 Ninjas Kick Back                  | 3 Ninjas Kick Back                  | Kanganis, Charles T.         | Charles T. Kanganis                 | tt0109015 |
| 1746513848 | 1910 | 1910 | The Mexican's Faith                 | The Mexican's Faith                 | Hamilton (?), Gilbert P.     | Gilbert M. 'Broncho Billy' Anderson | tt0001317 |
| 1746575081 | 1935 | 1935 | Metropolitan                        | Metropolitan                        | Boleslawski, Richard         | Richard Boleslawski                 | tt0026705 |
| 1746520175 | 1927 | 1927 | A Kiss in a Taxi                    | A Kiss in a Taxi                    | Badger, Clarence             | Clarence G. Badger                  | tt0018058 |
| 1746577363 | 1950 | 1950 | Outlaw Gold                         | Outlaw Gold                         | Fox, Wallace W.              | Wallace Fox                         | tt0042822 |
| 1746500133 | 1924 | 1924 | Another Man's Wife                  | Another Man's Wife                  | Mitchell, Bruce              | Bruce Mitchell                      | tt0014677 |
| 1746514287 | 1916 | 1916 | The Pearl of Paradise               | The Pearl of Paradise               | Pollard, Harry               | Harry A. Pollard                    | tt0163146 |
| 1746584143 | 1936 | 1936 | Yellow Cargo                        | Yellow Cargo                        | Wilbur, Crane                | Crane Wilbur                        | tt0028521 |
| 1746584749 | 1929 | 1929 | Stairs of Sand                      | Stairs of Sand                      | Brower, Otto                 | Otto Brower                         | tt0020448 |
| 1746249488 | 1975 | 1975 | Rooster Cogburn                     | Rooster Cogburn                     | Millar, Stuart               | Stuart Millar                       | tt0073636 |
| 1746516013 | 1922 | 1922 | A Wide-Open Town                    | A Wide Open Town                    | Ince, Ralph                  | Ralph Ince                          | tt0013764 |
| 1746584886 | 1940 | 1940 | The Ape                             | The Ape                             | Nigh, William                | William Nigh                        | tt0032215 |
| 1746555111 | 1956 | 1956 | The Oklahoma Woman                  | The Oklahoma Woman                  | Corman, Roger                | Roger Corman                        | tt0049570 |
| 1746523841 | 1916 | 1916 | The Pursuing Vengeance              | The Pursuing Vengeance              | Sabine, Martin               | Martin Sabine                       | tt0158867 |
| 1746520534 | 1926 | 1926 | Western Trails                      | Western Trails                      | Carpenter, H. B.             | Horace B. Carpenter                 | tt0177390 |
| 1746419774 | 1989 | 1989 | Harlem Nights                       | Harlem Nights                       | Murphy, Eddie                | Eddie Murphy                        | tt0097481 |
| 1746580952 | 1958 | 1958 | War of the Satellites               | War of the Satellites               | Corman, Roger                | Roger Corman                        | tt0052379 |
| 1745309150 | 2007 | 2007 | Broken English                      | Broken English                      | Cassavetes, Zoe              | Zoe R. Cassavetes                   | tt0772157 |
| 1746570261 | 1934 | 1934 | The Silver Streak                   | The Silver Streak                   | Atkins, Tommy                | Thomas Atkins                       | tt0027000 |
| 1746422261 | 1998 | 1998 | Buffalo '66                         | Buffalo '66                         | Gallo, Vincent               | Vincent Gallo                       | tt0118789 |
| 1746514986 | 1927 | 1927 | The Slaver                          | The Slaver                          | Revier, Harry                | Harry Revier                        | tt0164894 |
| 1746583992 | 1940 | 1940 | Behind the News                     | Behind the News                     | Santley, Joseph              | Joseph Santley                      | tt0032246 |
| 1746514941 | 1927 | 1927 | Irish Hearts                        | Irish Hearts                        | Haskin, Byron                | Byron Haskin                        | tt0018028 |
| 1746583327 | 1930 | 1930 | Song of the Flame                   | The Song of the Flame               | Crosland, Alan               | Alan Crosland                       | tt0021404 |
| 1746569734 | 1954 | 1954 | Flame and the Flesh                 | Flame and the Flesh                 | Brooks, Richard              | Richard Brooks                      | tt0046982 |
| 1746580930 | 1961 | 1961 | The Choppers                        | The Choppers                        | Jason, Leigh                 | Leigh Jason                         | tt0054744 |
| 1746436034 | 1940 | 1940 | Murder over New York                | Murder Over New York                | Lachman, Harry               | Harry Lachman                       | tt0032819 |
| 1746564761 | 1952 | 1952 | Target                              | Target                              | Gilmore, Stuart              | Stuart Gilmore                      | tt0045218 |
| 1746198068 | 1967 | 1966 | The Crazy World of Laurel and Hardy | The Crazy World of Laurel and Hardy |                              |                                     | tt0061528 |
| 1746248750 | 1973 | 1973 | Oklahoma Crude                      | Oklahoma Crude                      | Kramer, Stanley              | Stanley Kramer                      | tt0070472 |
| 1746218663 | 1972 | 1972 | Silent Running                      | Silent Running                      | Trumbull, Douglas            | Douglas Trumbull                    | tt0067756 |
| 1746575051 | 1934 | 1934 | Madame Spy                          | Madame Spy                          | Freund, Karl                 | Karl Freund                         | tt0025444 |
| 1746583209 | 1931 | 1931 | Red Fork Range                      | Red Fork Range                      | Neitz, Alvin J.              | Alan James                          | tt0022299 |
| 1746583560 | 1930 | 1929 | The Great Gabbo                     | The Great Gabbo                     | Cruze, James                 | James Cruze                         | tt0019946 |
| 1746574665 | 1938 | 1938 | Gold Is Where You Find It           | Gold Is Where You Find It           | Curtiz, Michael              | Michael Curtiz                      | tt0030192 |
| 1746507886 | 1949 | 1949 | Bride of Vengeance                  | Bride of Vengeance                  | Leisen, Mitchell             | Mitchell Leisen                     | tt0041209 |
| 1746501050 | 1916 | 1916 | The Two Edged Sword                 | The Two Edged Sword                 | Baker, George D.             | George D. Baker                     | tt0159059 |
| 1746580284 | 1935 | 1935 | One Way Ticket                      | One Way Ticket                      | Biberman, Herbert            | Herbert J. Biberman                 | tt0026825 |
| 1746486508 | 1918 | 1918 | Hearts or Diamonds?                 | Hearts or Diamonds?                 | King, Henry                  | Henry King                          | tt0009151 |
| 1746574123 | 1956 | 1956 | Johnny Concho                       | Johnny Concho                       | McGuire, Don                 | Don McGuire                         | tt0049384 |
| 1746583517 | 1928 | 1928 | Black Butterflies                   | Black Butterflies                   | Horne, James W.              | James W. Horne                      | tt0018704 |
| 1746501048 | 1915 | 1915 | The Barnstormers                    | The Barnstormers                    | Horne, James W.              | James W. Horne                      | tt0004939 |
| 1746567961 | 1933 | 1933 | Penthouse                           | Penthouse                           | Van Dyke, W. S.              | W.S. Van Dyke                       | tt0024435 |
| 1746497295 | 1922 | 1922 | The Trail of the Axe                | Trail of the Axe                    | Warde, Ernest C.             | Ernest C. Warde                     | tt0173348 |
| 1746573847 | 1957 | 1957 | Voodoo Woman                        | Voodoo Woman                        | Cahn, Edward L.              | Edward L. Cahn                      | tt0051174 |
| 1746574487 | 1935 | 1935 | Becky Sharp                         | Becky Sharp                         | Mamoulian, Rouben            | Rouben Mamoulian                    | tt0026104 |



|            |      |      |                                               |                                           |                        |                        |           |
|------------|------|------|-----------------------------------------------|-------------------------------------------|------------------------|------------------------|-----------|
| 1746577938 | 1939 | 1939 | Second Fiddle                                 | Second Fiddle                             | Lanfield, Sidney       | Sidney Lanfield        | tt0031907 |
| 1746574940 | 1933 | 1933 | When Ladies Meet                              | When Ladies Meet                          | Beaumont, Harry        | Harry Beaumont         | tt0024763 |
| 1746393755 | 1982 | 1982 | Conan the Barbarian                           | Conan the Barbarian                       | Milius, John           | John Milius            | tt0082198 |
| 1746580527 | 1937 | 1937 | Hopalong Rides Again                          | Hopalong Rides Again                      | Selander, Lesley       | Lesley Selander        | tt0029020 |
| 1746581183 | 1960 | 1960 | Five Bold Women                               | Five Bold Women                           | López-Portillo, Jorge  | Jorge López Portillo   | tt0052807 |
| 1746533038 | 1923 | 1923 | The Devil's Dooryard                          | The Devil's Dooryard                      | King, Lewis            | Louis King             | tt0013988 |
| 1746423493 | 1992 | 1992 | Ladybugs                                      | Ladybugs                                  | Furie, Sidney J.       | Sidney J. Furie        | tt0104670 |
| 1746570459 | 1933 | 1933 | The Silver Cord                               | The Silver Cord                           | Cromwell, John         | John Cromwell          | tt0024560 |
| 1746208138 | 1969 | 1969 | Hard Contract                                 | Hard Contract                             | Pogostin, S. Lee       | S. Lee Pogostin        | tt0064406 |
| 1746465160 | 1947 | 1947 | Love from a Stranger                          | Love from a Stranger                      | Whorf, Richard         | Richard Whorf          | tt0039586 |
| 1746464986 | 1944 | 1944 | The Falcon in Hollywood                       | The Falcon in Hollywood                   | Douglas, Gordon        | Gordon Douglas         | tt0036810 |
| 1746567113 | 1952 | 1952 | Montana Belle                                 | Montana Belle                             | Dwan, Allan            | Allan Dwan             | tt0044919 |
| 1746184582 | 1910 | 1910 | Blasted Hopes                                 | Blasted Hopes                             |                        |                        | tt0221025 |
| 1746437850 | 1943 | 1943 | Riders of the Deadline                        | Riders of the Deadline                    | Selander, Lesley       | Lesley Selander        | tt0037224 |
| 1746560773 | 1932 | 1932 | Son of Oklahoma                               | Son of Oklahoma                           | Bradbury, Robert N.    | Robert N. Bradbury     | tt0023494 |
| 1746520327 | 1948 | 1948 | Walk a Crooked Mile                           | Walk a Crooked Mile                       | Douglas, Gordon        | Gordon Douglas         | tt0040947 |
| 1746553584 | 1964 | 1964 | Mary Poppins                                  | Mary Poppins                              | Stevenson, Robert      | Robert Stevenson       | tt0058331 |
| 1746578841 | 1951 | 1951 | Along the Great Divide                        | Along the Great Divide                    | Walsh, Raoul           | Raoul Walsh            | tt0043276 |
| 1746497897 | 1920 | 1920 | The Unfortunate Sex                           | The Unfortunate Sex                       | La Maie, Elsier        | Elsier La Maie         | tt0202646 |
| 1746583180 | 1938 | 1938 | Sinners in Paradise                           | Sinners in Paradise                       | Whale, James           | James Whale            | tt0030754 |
| 1746500462 | 1927 | 1927 | On Your Toes                                  | On Your Toes                              | Newmeyer, Fred         | Fred C. Newmeyer       | tt0018220 |
| 1746487838 | 1917 | 1917 | The Small Town Guy                            | The Small Town Guy                        | Windom, L. C.          | Lawrence C. Windom     | tt0182430 |
| 1746574855 | 1933 | 1933 | Parachute Jumper                              | Parachute Jumper                          | Green, Alfred E.       | Alfred E. Green        | tt0024426 |
| 1746524477 | 1910 | 1910 | The Piece of Lace                             | The Piece of Lace                         | Miller, Ashley         | Ashley Miller          | tt1542761 |
| 1746584230 | 1936 | 1936 | Mister Cinderella                             | Mister Cinderella                         | Sedgwick, Edward       | Edward Sedgwick        | tt0027975 |
| 1746410891 | 1990 | 1990 | Bad Influence                                 | Bad Influence                             | Hanson, Curtis         | Curtis Hanson          | tt0099091 |
| 1746455400 | 1996 | 1996 | Citizen Ruth                                  | Citizen Ruth                              | Payne, Alexander       | Alexander Payne        | tt0115906 |
| 1746514135 | 1923 | 1923 | Speed King                                    | Speed King                                | Jones, Grover          | Grover Jones           | tt0166357 |
| 1746210300 | 1970 | 1970 | The Psycho Lover                              | The Psycho Lover                          | O'Neil, Robert Vincent | Robert Vincent O'Neill | tt0168137 |
| 1746524168 | 1914 | 1914 | The Yellow Traffic                            | The Yellow Traffic                        |                        | Olaf Skavlan           | tt0004840 |
| 1746580905 | 1935 | 1936 | Sunset of Power                               | Sunset of Power                           | Taylor, Ray            | Ray Taylor             | tt0028326 |
| 1746394733 | 1986 | 1986 | Heartbreak Ridge                              | Heartbreak Ridge                          | Eastwood, Clint        | Clint Eastwood         | tt0091187 |
| 1746569852 | 1958 | 1958 | The Missouri Traveler                         | The Missouri Traveler                     | Hopper, Jerry          | Jerry Hopper           | tt0051936 |
| 1746491785 | 1945 | 1945 | Lady on a Train                               | Lady on a Train                           | David, Charles         | Charles David          | tt0037859 |
| 1745374028 | 2008 | 2008 | First Sunday                                  | First Sunday                              | Talbert, David E.      | David E. Talbert       | tt0486578 |
| 1746569948 | 1956 | 1956 | Man from Del Rio                              | Man from Del Rio                          | Horner, Harry          | Harry Horner           | tt0049472 |
| 1746419762 | 1991 | 1992 | Tribulation 99: Alien Anomalies Under America | Tribulation 99: Alien Anomalies Under Ame | Baldwin, Craig         | Craig Baldwin          | tt0105639 |
| 1746504760 | 1921 | 1921 | Broadway Buckaroo                             | Broadway Buckaroo                         |                        | Phil Goldstone         | tt0355294 |
| 1746492753 | 1946 | 1946 | The Well Groomed Bride                        | The Well Groomed Bride                    | Lanfield, Sidney       | Sidney Lanfield        | tt0039098 |
| 1746508523 | 1924 | 1924 | The Next Corner                               | The Next Corner                           | Wood, Sam              | Sam Wood               | tt0015173 |
| 1746507754 | 1924 | 1924 | Judgment of the Storm                         | The Judgment of the Storm                 | Andrews, Del           | Del Andrews            | tt0015027 |
| 1746579013 | 1960 | 1960 | Desire in the Dust                            | Desire in the Dust                        | Claxton, William F.    | William F. Claxton     | tt0053762 |
| 1746508697 | 1926 | 1926 | The Better Man                                | The Better Man                            | Dunlap, Scott R.       | Scott R. Dunlap        | tt0016644 |
| 1746573811 | 1957 | 1957 | The Guns of Fort Petticoat                    | The Guns of Fort Petticoat                | Marshall, George       | George Marshall        | tt0050470 |
| 1746487284 | 1918 | 1918 | The Accidental Honeymoon                      | The Accidental Honeymoon                  | Perret, Léonce         | Léonce Perret          | tt0008813 |
| 1746573291 | 1932 | 1932 | Lady with a Past                              | Lady with a Past                          | Griffith, Edward H.    | Edward H. Griffith     | tt0023110 |
| 1746486133 | 1917 | 1917 | A Roadside Impresario                         | A Roadside Impresario                     | Crisp, Donald          | Donald Crisp           | tt0182392 |
| 1746524500 | 1927 | 1927 | What Happened to Father                       | What Happened to Father?                  | Adolfi, John G.        | John G. Adolfi         | tt0018559 |
| 1746512314 | 1922 | 1922 | Boy Crazy                                     | Boy Crazy                                 | Seiter, William A.     | William A. Seiter      | tt0012969 |
| 1746520387 | 1924 | 1924 | For Another Woman                             | For Another Woman                         | Kirkland, David        | David Kirkland         | tt0014922 |
| 1746584254 | 1935 | 1935 | Adventurous Knights                           | Adventurous Knights                       | Roberts, C. Edward     | Charles E. Roberts     | tt0026039 |
| 1746566189 | 1957 | 1956 | The Naked Eye                                 | The Naked Eye                             | Stoumen, Louis Clyde   | Louis Clyde Stoumen    | tt0049538 |
| 1746566099 | 1957 | 1957 | Satchmo the Great                             | Satchmo the Great                         |                        |                        | tt0135642 |
| 1746209273 | 1966 | 1966 | Frankie and Johnny                            | Frankie and Johnny                        | De Cordova, Frederick  | Frederick De Cordova   | tt0060429 |
| 1746585495 | 1939 | 1939 | Code of the Secret Service                    | Code of the Secret Service                | Smith, Noel            | Noel M. Smith          | tt0031166 |
| 1746554643 | 1963 | 1963 | The Haunting                                  | The Haunting                              | Wise, Robert           | Robert Wise            | tt0057129 |
| 1746583179 | 1935 | 1935 | The Keeper of the Bees                        | The Keeper of the Bees                    | Cabanne, Christy       | Christy Cabanne        | tt0026562 |

|            |      |      |                                    |                                    |                                     |                      |           |
|------------|------|------|------------------------------------|------------------------------------|-------------------------------------|----------------------|-----------|
| 1746572021 | 1931 | 1931 | Sea Ghost                          | The Sea Ghost                      | Nigh, William                       | William Nigh         | tt0022352 |
| 1745340902 | 2002 | 2002 | Queen of the Damned                | Queen of the Damned                | Rymer, Michael                      | Michael Rymer        | tt0238546 |
| 1746533051 | 1927 | 1927 | Held by the Law                    | Held by the Law                    | Laemmle, Edward                     | Ernst Laemmle        | tt0017978 |
| 1746475524 | 1947 | 1946 | Lady in the Lake                   | Lady in the Lake                   | Montgomery, Robert                  | Robert Montgomery    | tt0039545 |
| 1746562013 | 1953 | 1953 | Mister Scoutmaster                 | Mister Scoutmaster                 | Levin, Henry                        | Henry Levin          | tt0046081 |
| 1746410375 | 1986 | 1986 | Deadly Friend                      | Deadly Friend                      | Craven, Wes                         | Wes Craven           | tt0090917 |
| 1746562414 | 1957 | 1957 | Ghost Diver                        | Ghost Diver                        | Einfeld, Richard; White, Merrill G. | Richard Einfeld      | tt0050431 |
| 1746509267 | 1924 | 1924 | Missing Daughters                  | Missing Daughters                  | Clifford, William H.                | William H. Clifford  | tt0015143 |
| 1769970501 | 1967 | 1967 | Hip, Hot and 21                    | Hip Hot and 21                     | Berry, Dale                         | Dale Berry           | tt0140168 |
| 1746563639 | 1953 | 1953 | Appointment in Honduras            | Appointment in Honduras            | Tourneur, Jacques                   | Jacques Tourneur     | tt0045512 |
| 1746514988 | 1916 | 1916 | A Knight of the Range              | A Knight of the Range              | Jaccard, Jacques                    | Jacques Jaccard      | tt0006901 |
| 1746582574 | 1937 | 1937 | God's Country and the Woman        | God's Country and the Woman        | Keighley, William                   | William Keighley     | tt0028941 |
| 1746520411 | 1949 | 1949 | Renegades of the Sage              | Renegades of the Sage              | Nazarro, Ray                        | Ray Nazarro          | tt0041801 |
| 1746420996 | 1983 | 1983 | Never Cry Wolf                     | Never Cry Wolf                     | Ballard, Carroll                    | Carroll Ballard      | tt0086005 |
| 1746211080 | 1974 | 1974 | The Taking of Pelham One Two Three | The Taking of Pelham One Two Three | Sargent, Joseph                     | Joseph Sargent       | tt0072251 |
| 1745303075 | 2005 | 2005 | Kicking & Screaming                | Kicking & Screaming                | Dylan, Jesse                        | Jesse Dylan          | tt0384642 |
| 1746409370 | 1983 | 1983 | To Be or Not to Be                 | To Be or Not to Be                 | Johnson, Alan                       | Alan Johnson         | tt0086450 |
| 1769970701 | 1968 | 1968 | In Hot Blood                       | In Hot Blood                       | Rhewdhal, Leo J.                    | Joel Landwehr        | tt0221263 |
| 1746583975 | 1935 | 1935 | We're in the Money                 | We're in the Money                 | Enright, Ray                        | Ray Enright          | tt0027188 |
| 1746499936 | 1945 | 1945 | Wildfire                           | Wildfire                           | Tansey, Robert                      | Robert Emmett Tansey | tt0038254 |
| 1746500447 | 1949 | 1949 | You're My Everything               | You're My Everything               | Lang, Walter                        | Walter Lang          | tt0042060 |
| 1746501744 | 1915 | 1915 | The Garden of Lies                 | Garden of Lies                     | Pratt, John H.                      | Jack Pratt           | tt0005374 |
| 1746464823 | 1941 | 1941 | Road Show                          | Road Show                          | Roach, Hal                          | Hal Roach            | tt0034115 |
| 1746585428 | 1940 | 1940 | Granny Get Your Gun                | Granny Get Your Gun                | Amy, George                         | George Amy           | tt0032550 |
| 1746435196 | 1943 | 1943 | Frontier Badmen                    | Frontier Badmen                    | Beebe, Ford; McGann, William        | Ford Beebe           | tt0035904 |
| 1746577030 | 1962 | 1962 | Almost Angels                      | Almost Angels                      | Previn, Steven                      | Steve Previn         | tt0055740 |
| 1746570413 | 1933 | 1933 | Luxury Liner                       | Luxury Liner                       | Mendes, Lothar                      | Lothar Mendes        | tt0024281 |
| 1746581302 | 1951 | 1951 | Target Unknown                     | Target Unknown                     | Sherman, George                     | George Sherman       | tt0044108 |
| 1746583400 | 1928 | 1928 | The Awakening                      | The Awakening                      | Fleming, Victor                     | Victor Fleming       | tt0018666 |
| 1746580662 | 1937 | 1937 | Two Fisted Sheriff                 | Two Fisted Sheriff                 | Barsha, Leon                        | Leon Barsha          | tt0029703 |
| 1746408828 | 1991 | 1991 | The Rocketeer                      | The Rocketeer                      | Johnston, Joe                       | Joe Johnston         | tt0102803 |
| 1745395648 | 2009 | 2009 | Brief Interviews with Hideous Men  | Brief Interviews with Hideous Men  | Krasinski, John                     | John Krasinski       | tt0790627 |
| 1745359539 | 2010 | 2010 | Stonewall Uprising                 | Stonewall Uprising                 | Davis, Kate; Heilbroner, David      | Kate Davis           | tt1562450 |
| 1746568327 | 1934 | 1934 | We're Not Dressing                 | We're Not Dressing                 | Taurog, Norman                      | Norman Taurog        | tt0025965 |
| 1746438321 | 1941 | 1941 | Our Wife                           | Our Wife                           | Stahl, John M.                      | John M. Stahl        | tt0033986 |
| 1746509540 | 1926 | 1926 | Private Izzy Murphy                | Private Izzy Murphy                | Bacon, Lloyd                        | Lloyd Bacon          | tt0017290 |
| 1769969891 | 1912 | 1912 | The Legend of the Lost Arrow       | The Legend of the Lost Arrow       | Bosworth, Hobart                    | Hobart Bosworth      | tt0489169 |
| 1746248762 | 1974 | 1974 | The Bat People                     | The Bat People                     | Jameson, Jerry                      | Jerry Jameson        | tt0071198 |
| 1769971176 | 1969 | 1969 | The Bedspread                      | The Bed Spread                     |                                     |                      | tt0211234 |
| 1769970783 | 1915 | 1915 | The Patent Food Conveyor           | Patent Food Conveyor               | Williams, C. Jay                    | C.J. Williams        | tt0437411 |
| 1746583652 | 1930 | 1930 | The Way of All Men                 | The Way of All Men                 | Lloyd, Frank                        | Frank Lloyd          | tt0021535 |
| 1746474084 | 1945 | 1945 | The Big Show-Off                   | The Big Show Off                   | Bretherton, Howard                  | Howard Bretherton    | tt0037541 |
| 1746504006 | 1921 | 1921 | Little Miss Hawkshaw               | Little Miss Hawkshaw               | Harbaugh, Carl                      | Carl Harbaugh        | tt0012399 |
| 1746515033 | 1910 | 1910 | Muggsy's First Sweetheart          | Muggsy's First Sweetheart          | Griffith, D. W.                     | D.W. Griffith        | tt0001333 |
| 1746410743 | 1991 | 1991 | McBain                             | McBain                             | Glickenhau, James                   | James Glickenhau     | tt0102422 |
| 1746581468 | 1950 | 1950 | Trail of the Rustlers              | Trail of the Rustlers              | Nazarro, Ray                        | Ray Nazarro          | tt0043062 |
| 1746495877 | 1918 | 1918 | Pals First                         | Pals First                         | Carewe, Edwin                       | Edwin Carewe         | tt0009476 |
| 1746559814 | 1964 | 1964 | Send Me No Flowers                 | Send Me No Flowers                 | Jewison, Norman                     | Norman Jewison       | tt0058571 |
| 1746567269 | 1933 | 1933 | Under Secret Orders                | Under Secret Orders                | Newfield, Sam                       | Sam Newfield         | tt0024717 |
| 1746513787 | 1915 | 1915 | The Wily Chaperon                  | The Wily Chaperon                  | Ricketts, Thomas                    | Tom Ricketts         | tt0437590 |
| 1746542664 | 1950 | 1950 | Covered Wagon Raid                 | Covered Wagon Raid                 | Springsteen, R. G.                  | R.G. Springsteen     | tt0179737 |
| 1746566005 | 1955 | 1954 | Young at Heart                     | Young at Heart                     | Douglas, Gordon                     | Gordon Douglas       | tt0047688 |
| 1746422179 | 1997 | 1997 | Rosewood                           | Rosewood                           | Singleton, John                     | John Singleton       | tt0120036 |
| 1746502649 | 1922 | 1922 | The Girl Who Ran Wild              | The Girl Who Ran Wild              | Julian, Rupert                      | Rupert Julian        | tt0013173 |
| 1746562319 | 1953 | 1953 | No Escape                          | No Escape                          | Bennett, Charles                    | Charles Bennett      | tt0046130 |
| 1746584569 | 1931 | 1931 | Millie                             | Millie                             | Dillon, John Francis                | John Francis Dillon  | tt0022149 |
| 1746235704 | 1974 | 1974 | Sugar Hill                         | Sugar Hill                         | Maslansky, Paul                     | Paul Maslansky       | tt0072225 |

|            |      |      |                                      |                                      |                                |                       |           |
|------------|------|------|--------------------------------------|--------------------------------------|--------------------------------|-----------------------|-----------|
| 1745302608 | 2007 | 2007 | August Rush                          | August Rush                          | Sheridan, Kirsten              | Kirsten Sheridan      | tt0426931 |
| 1746575064 | 1934 | 1934 | Now I'll Tell                        | Now I'll Tell                        |                                | Edwin J. Burke        | tt0025579 |
| 1746474810 | 1948 | 1948 | Mr. Blandings Builds His Dream House | Mr. Blandings Builds His Dream House | Potter, H. C.                  | H. C. Potter          | tt0040613 |
| 1746270151 | 1980 | 1980 | Willie & Phil                        | Willie & Phil                        | Mazursky, Paul                 | Paul Mazursky         | tt0081758 |
| 1746555949 | 1956 | 1956 | Secrets of Life                      | Secrets of Life                      | Algar, James                   | James Algar           | tt0049733 |
| 1746574314 | 1959 | 1959 | A Stranger in My Arms                | A Stranger in My Arms                | Kautner, Helmut                | Helmut Käutner        | tt0051358 |
| 1746409981 | 1991 | 1991 | Scenes from a Mall                   | Scenes from a Mall                   | Mazursky, Paul                 | Paul Mazursky         | tt0102849 |
| 1746562300 | 1957 | 1957 | Outlaw Queen                         | Outlaw Queen                         | Greene, Herbert S.             | Herbert S. Greene     | tt0050811 |
| 1746260547 | 1980 | 1980 | Somewhere in Time                    | Somewhere in Time                    | Szwarc, Jeannot                | Jeannot Szwarc        | tt0081534 |
| 1746580652 | 1936 | 1936 | The Lion's Den                       | The Lion's Den                       | Newfield, Sam                  | Sam Newfield          | tt0027890 |
| 1746393232 | 1988 | 1988 | Night of the Demons                  | Night of the Demons                  | Tenney, Kevin S.               | Kevin Tenney          | tt0093624 |
| 1746424188 | 1943 | 1943 | The Avenging Rider                   | The Avenging Rider                   | Nelson, Sam                    | Sam Nelson            | tt0035655 |
| 1746570113 | 1933 | 1933 | What--No Beer?                       | What No Beer?                        | Sedgwick, Edward               | Edward Sedgwick       | tt0024762 |
| 1746409061 | 1981 | 1981 | The Funhouse                         | The Funhouse                         | Hooper, Tobe                   | Tobe Hooper           | tt0082427 |
| 1746474527 | 1946 | 1946 | Gunning for Vengeance                | Gunning for Vengeance                | Nazarro, Ray                   | Ray Nazarro           | tt0038581 |
| 1746533003 | 1915 | 1915 | The Luring Lights                    | The Luring Lights                    |                                | Robert G. Vignola     | tt0005668 |
| 1746509034 | 1925 | 1925 | The Mad Marriage                     | The Mad Marriage                     | Donovan, Frank P.              | Frank P. Donovan      | tt0016062 |
| 1746218725 | 1973 | 1972 | Sisters                              | Sisters                              | De Palma, Brian                | Brian De Palma        | tt0070698 |
| 1746553793 | 1965 | 1965 | The Bounty Killer                    | The Bounty Killer                    | Bennet, Spencer Gordon         | Spencer Gordon Bennet | tt0058988 |
| 1746419180 | 1983 | 1983 | The Right Stuff                      | The Right Stuff                      | Kaufman, Philip                | Philip Kaufman        | tt0086197 |
| 1746496274 | 1917 | 1917 | The Gun Fighter                      | The Gun Fighter                      | Hart, William S.               | William S. Hart       | tt0008036 |
| 1746582419 | 1937 | 1937 | Counsel for Crime                    | Counsel for Crime                    | Brahm, John                    | John Brahm            | tt0028743 |
| 1746573968 | 1957 | 1957 | The Pride and the Passion            | The Pride and the Passion            | Kramer, Stanley                | Stanley Kramer        | tt0050858 |
| 1746453533 | 1943 | 1943 | Sagebrush Law                        | Sagebrush Law                        | Nelson, Sam                    | Sam Nelson            | tt0035282 |
| 1746419489 | 1940 | 1940 | Gallant Sons                         | Gallant Sons                         |                                | George B. Seitz       | tt0032503 |
| 1746574923 | 1937 | 1937 | A Doctor's Diary                     | A Doctor's Diary                     | Vidor, Charles                 | Charles Vidor         | tt0028793 |
| 1746566674 | 1934 | 1934 | Two Heads on a Pillow                | Two Heads on a Pillow                | Nigh, William                  | William Nigh          | tt0025924 |
| 1746583333 | 1929 | 1929 | Sea Fury                             | Sea Fury                             | Melford, George                | George Melford        | tt0020379 |
| 1746562383 | 1957 | 1957 | God Is My Partner                    | God Is My Partner                    | Claxton, William F.            | William F. Claxton    | tt0050447 |
| 1746520595 | 1926 | 1926 | West of the Rainbow's End            | West of the Rainbow's End            | Cohn, Bennett                  | Bennett Cohn          | tt0017535 |
| 1746563218 | 1951 | 1950 | Stage to Tucson                      | Stage to Tucson                      | Murphy, Ralph                  | Ralph Murphy          | tt0042995 |
| 1745357727 | 2002 | 2002 | Showtime                             | Showtime                             | Dey, Tom                       | Tom Dey               | tt0284490 |
| 1746453486 | 1941 | 1941 | Robbers of the Range                 | Robbers of the Range                 | Killy, Edward                  | Edward Killy          | tt0034119 |
| 1746583177 | 1935 | 1935 | A Night at the Opera                 | A Night at the Opera                 | Wood, Sam                      | Sam Wood              | tt0026778 |
| 1769970580 | 1968 | 1968 | A Thousand Pleasures                 | A Thousand Pleasures                 | Marsh, Julian                  | Michael Findlay       | tt0063690 |
| 1746554243 | 1965 | 1965 | Young Fury                           | Young Fury                           | Nyby, Christian                | Christian Nyby        | tt0059932 |
| 1746504745 | 1917 | 1917 | Paradise Garden                      | Paradise Garden                      | Balshofer, Fred J.             | Fred J. Balshofer     | tt0008407 |
| 1746578052 | 1937 | 1937 | Portia on Trial                      | Portia on Trial                      | Nicholls, George               | George Nichols Jr.    | tt0029433 |
| 1746424594 | 1942 | 1942 | On the Sunny Side                    | On the Sunny Side                    | Schuster, Harold               | Harold D. Schuster    | tt0035150 |
| 1746584266 | 1935 | 1935 | Reckless Roads                       | Reckless Roads                       | Lynwood, Burt                  | Burt P. Lynwood       | tt0026915 |
| 1746440080 | 1999 | 1999 | The Underground Comedy Movie         | The Underground Comedy Movie         | Offer, Vince                   | Vince Offer           | tt0201290 |
| 1746578033 | 1938 | 1938 | Stablemates                          | Stablemates                          | Wood, Sam                      | Sam Wood              | tt0030786 |
| 1746474842 | 1948 | 1947 | For You I Die                        | For You I Die                        | Reinhardt, John                | John Reinhardt        | tt0039389 |
| 1746509310 | 1927 | 1927 | The Opening Night                    | The Opening Night                    | Griffith, Edward H.            | Edward H. Griffith    | tt0018234 |
| 1746562142 | 1956 | 1956 | Fury at Gunsight Pass                | Fury at Gunsight Pass                | Sears, Fred F.                 | Fred F. Sears         | tt0049245 |
| 1746495900 | 1920 | 1920 | Love                                 | Love                                 | Ruggles, Wesley                | Wesley Ruggles        | tt0196715 |
| 1746574951 | 1933 | 1933 | Secrets                              | Secrets                              | Borzage, Frank                 | Frank Borzage         | tt0024539 |
| 1746454252 | 1941 | 1941 | Blossoms in the Dust                 | Blossoms in the Dust                 | LeRoy, Mervyn                  | Mervyn LeRoy          | tt0033407 |
| 1746475953 | 1948 | 1948 | Embraceable You                      | Embraceable You                      | Jacoves, Felix                 | Felix Jacoves         | tt0040315 |
| 1746582720 | 1937 | 1937 | Valley of Terror                     | Valley of Terror                     | Herman, Al                     | Albert Herman         | tt0169357 |
| 1746573195 | 1932 | 1932 | A Parisian Romance                   | A Parisian Romance                   | Franklin, Chester M.           | Chester M. Franklin   | tt0023319 |
| 1746574637 | 1937 | 1937 | You Can't Have Everything            | You Can't Have Everything            | Taugog, Norman                 | Norman Taugog         | tt0029806 |
| 1746409424 | 1984 | 1983 | My Breakfast With Blassie            | My Breakfast with Blassie            | Legend, Johnny; Lautrec, Linda | Linda Lautrec         | tt0085979 |
| 1746580275 | 1937 | 1937 | It's All Yours                       | It's All Yours                       | Nugent, Elliott                | Elliott Nugent        | tt0029057 |
| 1746514645 | 1917 | 1917 | Black Orchids                        | Black Orchids                        | Ingram, Rex                    | Rex Ingram            | tt0006434 |
| 1746410396 | 1987 | 1987 | Born in East L. A.                   | Born in East L.A.                    | Marin, Cheech                  | Cheech Marin          | tt0092690 |
| 1746574552 | 1933 | 1933 | The Sweetheart of Sigma Chi          | The Sweetheart of Sigma Chi          | Marin, Edwin L.                | Edwin L. Marin        | tt0024635 |

|                   |             |             |                                   |                                   |                                   |                        |                  |
|-------------------|-------------|-------------|-----------------------------------|-----------------------------------|-----------------------------------|------------------------|------------------|
| 1746453530        | 1941        | 1941        | Hard Guy                          | Hard Guy                          | Clifton, Elmer                    | Elmer Clifton          | tt0033688        |
| 1746423333        | 1997        | 1997        | Free Willy 3: The Rescue          | Free Willy 3: The Rescue          | Pillsbury, Sam                    | Sam Pillsbury          | tt0119152        |
| 1745358703        | 2010        | 2010        | Our Family Wedding                | Our Family Wedding                | Famuyiwa, Rick                    | Rick Famuyiwa          | tt1305583        |
| 1769977749        | 1981        | 1981        | This Is Elvis                     | This Is Elvis                     | Leo, Malcolm; Solt, Andrew        | Malcolm Leo            | tt0083193        |
| 1746577314        | 1951        | 1951        | As You Were!                      | As You Were                       | Guiol, Fred L.                    | Bernard Girard         | tt0043298        |
| 1746434673        | 1999        | 1999        | She's All That                    | She's All That                    | Iscove, Robert                    | Robert Iscove          | tt0160862        |
| 1745293999        | 2007        | 2007        | The Great Debaters                | The Great Debaters                | Washington, Denzel                | Denzel Washington      | tt0427309        |
| 1746582962        | 1936        | 1935        | Defying the Law                   | Defying the Law                   | Horner, Robert J.                 | Robert J. Horner       | tt0214622        |
| 1746409949        | 1989        | 1989        | Always                            | Always                            | Spielberg, Steven                 | Steven Spielberg       | tt0096794        |
| 1746504084        | 1921        | 1921        | Across the Divide                 | Across the Divide                 | Holloway, John                    | John Holloway          | tt0011905        |
| 1746499963        | 1925        | 1925        | The Live Wire                     | The Live Wire                     | Hines, Charles                    | Charles Hines          | tt0016034        |
| 1746583092        | 1936        | 1936        | Human Cargo                       | Human Cargo                       | Dwan, Allan                       | Allan Dwan             | tt0027769        |
| 1746488042        | 1920        | 1920        | Trumpet Island                    | Trumpet Island                    | Terriss, Tom                      | Tom Terriss            | tt0011793        |
| 1746562192        | 1953        | 1953        | Easy to Love                      | Easy to Love                      | Walters, Charles                  | Charles Walters        | tt0045718        |
| 1746524926        | 1916        | 1916        | A Child of the Paris Streets      | A Child of the Paris Streets      | Ingraham, Lloyd                   | Lloyd Ingraham         | tt0006505        |
| 1769970816        | 1912        | 1912        | The Spanish Cavalier              | The Spanish Cavalier              |                                   | J. Searle Dawley       | tt0794354        |
| 1746438181        | 1942        | 1942        | Sin Town                          | Sin Town                          | Enright, Ray                      | Ray Enright            | tt0035337        |
| 1769976136        | 1918        | 1918        | Give Her Gas                      | Give Her Gas                      | Lyons, Eddie; Moran, Lee          | Eddie Lyons            | tt0332631        |
| 1746532990        | 1914        | 1914        | The Eagle's Mate                  | The Eagle's Mate                  | Kirkwood, James                   | James Kirkwood         | tt0003871        |
| 1746434368        | 1989        | 1989        | Miss Firecracker                  | Miss Firecracker                  | Schlamme, Thomas                  | Thomas Schlamme        | tt0097892        |
| 1746582760        | 1936        | 1936        | Vengeance of Rannah               | Vengeance of Rannah               | Samuels, Raymond; Shamray, Frankl | Bernard B. Ray         | tt0168239        |
| 1746216812        | 1967        | 1967        | Blast-Off Girls                   | Blast Off Girls                   | Lewis, Herschell Gordon           | Herschell Gordon Lewis | tt0061408        |
| 1746475748        | 1945        | 1945        | Hollywood and Vine                | Hollywood and Vine                | Thurn-Taxis, Alexis               | Alexis Thurn           | tt0037786        |
| 1746394037        | 1993        | 1993        | Beethoven's 2nd                   | Beethoven's 2nd                   | Daniel, Rod                       | Rod Daniel             | tt0106375        |
| 1746233134        | 1969        | 1969        | What Ever Happened to Aunt Alice? | What Ever Happened to Aunt Alice? | Katzin, Lee H.                    | Lee H. Katzin          | tt0065206        |
| 1746464799        | 1944        | 1944        | Nine Girls                        | Nine Girls                        | Jason, Leigh                      | Leigh Jason            | tt0037131        |
| 1746584774        | 1929        | 1929        | The Oklahoma Kid                  | The Oklahoma Kid                  | McGowan, J. P.                    | J.P. McGowan           | tt0020236        |
| <b>1746503827</b> | <b>1918</b> | <b>1918</b> | <b>Marriage</b>                   | <b>Marriage</b>                   | <b>Kirkwood, James</b>            | <b>James Kirkwood</b>  | <b>tt0009352</b> |
| 1746420240        | 1993        | 1992        | Wishman                           | Wishman                           | Marvin, Michael                   | Mike Marvin            | tt0103273        |
| 1746569777        | 1957        | 1957        | Untamed Youth                     | Untamed Youth                     | Koch, Howard W.                   | Howard W. Koch         | tt0051139        |
| 1746491777        | 1947        | 1947        | The Story of Mr. Hobbs            | The Story of Mr. Hobbs            | Alagia, Lorenzo                   | Arthur Varney          | tt1282478        |
| 1746512199        | 1923        | 1923        | The Shriek of Araby               | The Shriek of Araby               | Jones, F. Richard                 | F. Richard Jones       | tt0014467        |
| 1746420232        | 1987        | 1987        | Ernest Goes to Camp               | Ernest Goes to Camp               | Cherry, John                      | John R. Cherry III     | tt0092974        |
| 1746474537        | 1944        | 1944        | Minstrel Man                      | Minstrel Man                      | Lewis, Joseph H.; Fox, Wallace    | Joseph H. Lewis        | tt0037076        |
| 1746560313        | 1964        | 1964        | Point of Order!                   | Point of Order!                   | de Antonio, Emile                 | Emile de Antonio       | tt0058481        |
| 1746234474        | 1968        | 1968        | You Are What You Eat              | You Are What You Eat              | Feinstein, Barry                  | Barry Feinstein        | tt0142005        |
| 1746453848        | 1943        | 1943        | Cinderella Swings It              | Cinderella Swings It              | Cabanne, Christy                  | Christy Cabanne        | tt0035738        |
| 1746453593        | 1940        | 1940        | Tugboat Annie Sails Again         | Tugboat Annie Sails Again         | Seiler, Lewis                     | Lewis Seiler           | tt0033187        |
| 1746525166        | 1921        | 1921        | Uncharted Seas                    | Uncharted Seas                    | Ruggles, Wesley                   | Wesley Ruggles         | tt0012788        |
| 1746583454        | 1930        | 1930        | The Border Legion                 | The Border Legion                 | Brower, Otto; Knopf, Edwin H.     | Otto Brower            | tt0020700        |
| 1746561597        | 1957        | 1957        | Decision at Sundown               | Decision at Sundown               | Boetticher, Budd                  | Budd Boetticher        | tt0050296        |
| 1746491863        | 1944        | 1944        | Rogues Gallery                    | Rogues' Gallery                   | Herman, Albert                    | Albert Herman          | tt0038034        |
| 1746512882        | 1916        | 1916        | The Last Act                      | The Last Act                      | Edwards, Walter                   | Walter Edwards         | tt0163047        |
| 1746578480        | 1959        | 1959        | The Last Angry Man                | The Last Angry Man                | Mann, Daniel                      | Daniel Mann            | tt0052990        |
| 1746424250        | 1941        | 1941        | Accent on Love                    | Accent on Love                    | McCarey, Ray                      | Ray McCarey            | tt0033311        |
| 1745357916        | 2002        | 2002        | Undercover Brother                | Undercover Brother                | Lee, Malcolm D.                   | Malcolm D. Lee         | tt0279493        |
| 1746580838        | 1938        | 1938        | Newsboys' Home                    | Newsboys' Home                    | Young, Harold                     | Harold Young           | tt0031720        |
| 1746582203        | 1931        | 1931        | Monsters of the Deep              | Monsters of the Deep              |                                   | Harold Austin          | tt0151624        |
| 1746577589        | 1937        | 1937        | Melody of the Plains              | Melody of the Plains              |                                   | Sam Newfield           | tt0029230        |
| 1746454805        | 1998        | 1998        | Slappy & the Stinkers             | Slappy and the Stinkers           | Newfield, Sam                     | Barnet Kellman         | tt0120213        |
| 1746574473        | 1933        | 1933        | To the Last Man                   | To the Last Man                   | Kellman, Barnet                   | Henry Hathaway         | tt0024674        |
| 1746578433        | 1958        | 1958        | She Demons                        | She Demons                        | Hathaway, Henry                   | Richard E. Cunha       | tt0052187        |
| 1746465096        | 1946        | 1946        | The Desert Horseman               | The Desert Horseman               | Cunha, Richard E.                 | Ray Nazarro            | tt0038467        |
| 1746467363        | 1917        | 1917        | The Food Gamblers                 | The Food Gamblers                 | Nazarro, Ray                      | Albert Parker          | tt0007962        |
| 1746435619        | 1942        | 1942        | Juke Box Jenny                    | Juke Box Jenny                    | Parker, Albert                    | Harold Young           | tt0034927        |
| 1746569640        | 1954        | 1954        | The Adventures of Hajji Baba      | The Adventures of Hajji Baba      | Young, Harold                     | Don Weis               | tt0046683        |
| 1746577215        | 1963        | 1963        | Heavenly Bodies                   | Heavenly Bodies!                  | Weis, Don                         | Russ Meyer             | tt0057133        |
|                   |             |             |                                   |                                   | Meyer, Russ                       |                        |                  |

|            |      |      |                                |                                |                                  |                       |           |
|------------|------|------|--------------------------------|--------------------------------|----------------------------------|-----------------------|-----------|
| 1746492756 | 1948 | 1948 | Julia Misbehaves               | Julia Misbehaves               | Conway, Jack                     | Jack Conway           | tt0040498 |
| 1745358583 | 2008 | 2008 | Strange Wilderness             | Strange Wilderness             | Wolf, Fred                       | Fred Wolf             | tt0489282 |
| 1746581935 | 1910 | 1910 | The Highlander's Defiance      | The Highlander's Defiance      |                                  |                       | tt0352401 |
| 1746504001 | 1920 | 1920 | Neptune's Bride                | Neptune's Bride                | Peacocke, Leslie T.              | Leslie T. Peacocke    | tt0196786 |
| 1746198758 | 1966 | 1966 | Brighty of the Grand Canyon    | Brighty of the Grand Canyon    | Foster, Norman                   | Norman Foster         | tt0061424 |
| 1746200298 | 1969 | 1969 | Marooned                       | Marooned                       | Sturges, John                    | John Sturges          | tt0064639 |
| 1746509170 | 1927 | 1927 | The Land Beyond the Law        | The Land Beyond the Law        | Brown, Harry J.                  | Harry Joe Brown       | tt0018076 |
| 1769970466 | 1967 | 1967 | The Lusting Hours              | Lusting Hours                  |                                  | John Amero            | tt0242625 |
| 1746502202 | 1910 | 1910 | The Two Brothers               | The Two Brothers               | Griffith, D. W.                  | D.W. Griffith         | tt0001428 |
| 1746508981 | 1925 | 1925 | The Handicap                   | The Handicap                   | O'Brien, John B.                 | John B. O'Brien       | tt4481158 |
| 1746584547 | 1929 | 1929 | Three Live Ghosts              | Three Live Ghosts              | Freeland, Thornton               | Thornton Freeland     | tt0020496 |
| 1746500992 | 1916 | 1916 | The Law's Injustice            | The Law's Injustice            | Sloman, Edward                   | Edward Sloman         | tt0489153 |
| 1746501045 | 1910 | 1910 | Mr. Bumptious on Birds         | Mr. Bumptious on Birds         | Miller, Ashley                   | Ashley Miller         | tt1499675 |
| 1746582838 | 1937 | 1937 | When Love Is Young             | When Love Is Young             | Mohr, Hal                        | Hal Mohr              | tt0029759 |
| 1746515787 | 1922 | 1922 | Under Two Flags                | Under Two Flags                | Browning, Tod                    | Tod Browning          | tt0013719 |
| 1746497480 | 1919 | 1919 | Forbidden                      | Forbidden                      | Weber, Lois; Smalley, Phillips   | Phillips Smalley      | tt0010140 |
| 1746584690 | 1930 | 1930 | Paradise Island                | Paradise Island                | Glennon, Bert                    | Bert Glennon          | tt0021231 |
| 1746579037 | 1959 | 1959 | Verboten!                      | Verboten!                      | Fuller, Samuel                   | Samuel Fuller         | tt0052354 |
| 1746497673 | 1920 | 1920 | Silk Husbands and Calico Wives | Silk Husbands and Calico Wives | Green, Alfred E.                 | Alfred E. Green       | tt0011694 |
| 1746200297 | 1968 | 1968 | Dayton's Devils                | Dayton's Devils                | Shea, Jack                       | Jack Shea             | tt0062866 |
| 1746454044 | 1943 | 1943 | Above Suspicion                | Above Suspicion                | Thorpe, Richard                  | Richard Thorpe        | tt0035605 |
| 1746554316 | 1963 | 1963 | The Cardinal                   | The Cardinal                   | Preminger, Otto                  | Otto Preminger        | tt0056907 |
| 1746491968 | 1944 | 1944 | Dragon Seed                    | Dragon Seed                    | Conway, Jack; Bucquet, Harold S. | Harold S. Bucquet     | tt0036777 |
| 1746474127 | 1946 | 1946 | Valley of the Zombies          | Valley of the Zombies          | Ford, Philip                     | Philip Ford           | tt0039076 |
| 1746569571 | 1955 | 1955 | Three Stripes in the Sun       | Three Stripes in the Sun       | Murphy, Richard                  | Richard Murphy        | tt0049257 |
| 1746424390 | 1942 | 1942 | Tish                           | Tish                           | Simon, S. Sylvan                 | S. Sylvan Simon       | tt0035445 |
| 1769970627 | 1968 | 1968 | Mid-Day Mistress               | Mid Day Mistress               | Emyl, Rolf                       | Rolf Emyl             | tt0246781 |
| 1745293703 | 2007 | 2006 | The TV Set                     | The TV Set                     | Kasdan, Jake                     | Jake Kasdan           | tt0473709 |
| 1746500619 | 1924 | 1924 | Yolanda                        | Yolanda                        | Vignola, Robert G.               | Robert G. Vignola     | tt0015518 |
| 1769970645 | 1968 | 1968 | The Specialists                | The Specialists                | Moser, Clem                      | Nick Millard          | tt0258199 |
| 1746520852 | 1925 | 1925 | Beauty and the Bad Man         | Beauty and the Bad Man         | Worthington, William             | William Worthington   | tt0015609 |
| 1746393968 | 1987 | 1987 | Steel Dawn                     | Steel Dawn                     | Hool, Lance                      | Lance Hool            | tt0094033 |
| 1746577323 | 1951 | 1951 | Missing Women                  | Missing Women                  | Ford, Philip                     | Philip Ford           | tt0043810 |
| 1746211271 | 1973 | 1973 | Super Fly T.N.T.               | Super Fly T.N.T.               | O'Neal, Ron                      | Ron O'Neal            | tt0070753 |
| 1746524598 | 1916 | 1916 | The Salamander                 | The Salamander                 | Donaldson, Arthur                | Arthur Donaldson      | tt0007281 |
| 1746585386 | 1939 | 1939 | Remember?                      | Remember?                      | McLeod, Norman Z.                | Norman Z. McLeod      | tt0031845 |
| 1746572317 | 1932 | 1932 | Week-end Marriage              | Week End Marriage              | Freeland, Thornton               | Thornton Freeland     | tt0023677 |
| 1746582314 | 1931 | 1931 | Touchdown!                     | Touchdown!                     | McLeod, Norman                   | Norman Z. McLeod      | tt0022493 |
| 1746454929 | 1946 | 1946 | The Phantom Thief              | The Phantom Thief              | Lederman, D. Ross                | D. Ross Lederman      | tt0038839 |
| 1746574830 | 1934 | 1934 | The Fighting Rookie            | The Fighting Rookie            | Bennet, Spencer Gordon           | Spencer Gordon Bennet | tt0025112 |
| 1746583788 | 1931 | 1931 | The Royal Bed                  | The Royal Bed                  | Sherman, Lowell                  | Lowell Sherman        | tt0022326 |
| 1746421949 | 1992 | 1992 | Glengarry Glen Ross            | Glengarry Glen Ross            | Foley, James                     | James Foley           | tt0104348 |
| 1746504223 | 1917 | 1917 | A Stormy Knight                | A Stormy Knight                | Clifton, Elmer                   | Elmer Clifton         | tt0008633 |
| 1746499992 | 1924 | 1924 | Birthright                     | Birthright                     | Micheaux, Oscar                  | Oscar Micheaux        | tt0014717 |
| 1746421255 | 1996 | 1996 | Girl 6                         | Girl 6                         | Lee, Spike                       | Spike Lee             | tt0116414 |
| 1746566254 | 1954 | 1954 | Untamed Heiress                | Untamed Heiress                | Lamont, Charles                  | Charles Lamont        | tt0047635 |
| 1746577476 | 1962 | 1962 | All Fall Down                  | All Fall Down                  | Frankenheimer, John              | John Frankenheimer    | tt0055738 |
| 1746454094 | 1942 | 1942 | The Man Who Wouldn't Die       | The Man Who Wouldn't Die       | Leeds, Herbert I.                | Herbert I. Leeds      | tt0035027 |
| 1746555407 | 1956 | 1956 | Wetbacks                       | Wetbacks                       | McCune, Hank                     | Hank McCune           | tt0049946 |
| 1746483853 | 1917 | 1917 | The Circus of Life             | The Circus of Life             | Julian, Rupert                   | Rupert Julian         | tt0007798 |
| 1746455131 | 1996 | 1996 | My Fellow Americans            | My Fellow Americans            | Segal, Peter                     | Peter Segal           | tt0117119 |
| 1746584402 | 1940 | 1940 | Maryland                       | Maryland                       | King, Henry                      | Henry King            | tt0032766 |
| 1746232995 | 1968 | 1968 | Counterpoint                   | Counterpoint                   | Nelson, Ralph                    | Ralph Nelson          | tt0062829 |
| 1746504596 | 1922 | 1922 | Sky High                       | Sky High                       | Reynolds, Lynn                   | Lynn Reynolds         | tt0013607 |
| 1746209071 | 1966 | 1966 | Gunpoint                       | Gunpoint                       | Bellamy, Earl                    | Earl Bellamy          | tt0060483 |
| 1746576877 | 1932 | 1932 | It's Tough to Be Famous        | It's Tough to Be Famous        | Green, Alfred E.                 | Alfred E. Green       | tt0021919 |
| 1746257387 | 1976 | 1976 | Assault on Precinct 13         | Assault on Precinct 13         | Carpenter, John                  | John Carpenter        | tt0074156 |

|                   |             |             |                                    |                                    |                              |                     |                  |
|-------------------|-------------|-------------|------------------------------------|------------------------------------|------------------------------|---------------------|------------------|
| 1746583249        | 1929        | 1929        | Frozen River                       | Frozen River                       | Weight, F. Harmon            | F. Harmon Weight    | tt0019908        |
| 1746520042        | 1926        | 1926        | Laddie                             | Laddie                             | Meehan, James Leo            | James Leo Meehan    | tt0017051        |
| 1746514143        | 1916        | 1916        | The Redemption of Dave Darcey      | The Redemption of Dave Darcey      | Scardon, Paul                | Paul Scardon        | tt0158891        |
| 1746577796        | 1938        | 1938        | Paradise for Three                 | Paradise for Three                 | Buzzell, Edward              | Edward Buzzell      | tt0030554        |
| 1746583972        | 1936        | 1936        | Black Gold                         | Black Gold                         | Hopton, Russell              | Russell Hopton      | tt0027366        |
| 1746584372        | 1936        | 1936        | The Singing Kid                    | The Singing Kid                    | Keighley, William            | William Keighley    | tt0028257        |
| 1745309175        | 2005        | 2005        | Beauty Shop                        | Beauty Shop                        | Woodruff, Bille              | Bille Woodruff      | tt0388500        |
| <b>1746475950</b> | <b>1948</b> | <b>1948</b> | <b>Raw Deal</b>                    | <b>Raw Deal</b>                    | <b>Mann, Anthony</b>         | <b>Anthony Mann</b> | <b>tt0040723</b> |
| 1745293637        | 2005        | 2005        | Kiss Kiss, Bang Bang               | Kiss Kiss, Bang Bang               | Black, Shane                 | Shane Black         | tt0373469        |
| 1746464832        | 1941        | 1941        | Sunny                              | Sunny                              | Wilcox, Herbert              | Herbert Wilcox      | tt0034243        |
| 1746508106        | 1925        | 1925        | Galloping Vengeance                | Galloping Vengeance                | Craft, William James         | William James Craft | tt0133788        |
| 1746423463        | 1989        | 1989        | Dead-Bang                          | Dead Bang                          | Frankenheimer, John          | John Frankenheimer  | tt0097166        |
| 1746568207        | 1932        | 1932        | Prosperity                         | Prosperity                         | Wood, Sam                    | Sam Wood            | tt0023358        |
| 1746582022        | 1928        | 1928        | Riding for Fame                    | Riding for Fame                    | Eason, Reeves                | B. Reeves Eason     | tt0019324        |
| 1746567955        | 1933        | 1933        | Olsen's Big Moment                 | Olsen's Big Moment                 | St. Clair, Malcolm           | Malcolm St. Clair   | tt0024406        |
| 1746514800        | 1910        | 1910        | The Wonderful Wizard of Oz         | The Wonderful Wizard of Oz         | Turner, Otis                 | Otis Turner         | tt0001463        |
| 1746409694        | 1987        | 1987        | Three O'Clock High                 | Three O'Clock High                 | Joanou, Phil                 | Phil Joanou         | tt0094138        |
| 1746555836        | 1956        | 1956        | The Killing                        | The Killing                        | Kubrick, Stanley             | Stanley Kubrick     | tt0049406        |
| 1746586167        | 1939        | 1939        | Heritage of the Desert             | Heritage of the Desert             | Selander, Lesley             | Lesley Selander     | tt0031419        |
| 1746410617        | 1988        | 1988        | Killer Klowns from Outer Space     | Killer Klowns from Outer Space     | Chiodo, Stephen              | Stephen Chiodo      | tt0095444        |
| 1746502837        | 1915        | 1915        | The End of the Road                | The End of the Road                | Ricketts, Thomas             | Tom Ricketts        | tt0005244        |
| 1746410550        | 1988        | 1988        | I'm Gonna Git You Sucka            | I'm Gonna Git You Sucka            | Wayans, Keenen Ivory         | Keenen Ivory Wayans | tt0095348        |
| 1746497553        | 1920        | 1920        | The White Rider                    | The White Rider                    | Craft, William J.            | William James Craft | tt0203196        |
| 1746583777        | 1930        | 1930        | So This Is London                  | So This Is London                  | Blystone, John               | John G. Blystone    | tt0021395        |
| 1746410696        | 1991        | 1991        | The People Under the Stairs        | The People Under the Stairs        | Craven, Wes                  | Wes Craven          | tt0105121        |
| 1746520969        | 1949        | 1949        | Riders of the Dusk                 | Riders of the Dusk                 | Hillyer, Lambert             | Lambert Hillyer     | tt0041808        |
| 1746500709        | 1948        | 1948        | Smoky Mountain Melody              | Smoky Mountain Melody              | Nazarro, Ray                 | Ray Nazarro         | tt0041888        |
| 1746582761        | 1936        | 1936        | Dimples                            | Dimples                            | Seiter, William A.           | William A. Seiter   | tt0027527        |
| 1746566042        | 1953        | 1953        | From Here to Eternity              | From Here to Eternity              | Zinnemann, Fred              | Fred Zinnemann      | tt0045793        |
| 1746219159        | 1980        | 1980        | The Island                         | The Island                         | Ritchie, Michael             | Michael Ritchie     | tt0080934        |
| 1745272652        | 2001        | 2001        | Bully                              | Bully                              | Clark, Larry                 | Larry Clark         | tt0242193        |
| 1746508385        | 1927        | 1927        | One Glorious Scrap                 | One Glorious Scrap                 | Lewis, Edgar                 | Edgar Lewis         | tt0018225        |
| 1746250019        | 1976        | 1976        | Drum                               | Drum                               | Carver, Steve                | Steve Carver        | tt0074437        |
| 1746520719        | 1926        | 1925        | The Silent Guardian                | The Silent Guardian                | Bletcher, William            | Billy Bletcher      | tt0017387        |
| 1746575027        | 1934        | 1934        | Coming Out Party                   | Coming Out Party                   | Blystone, John               | John G. Blystone    | tt0024996        |
| 1746520856        | 1948        | 1948        | Will It Happen Again?              | Will It Happen Again?              |                              | Dwain Esper         | tt0204454        |
| 1746473925        | 1947        | 1947        | Raiders of the South               | Raiders of the South               | Hillyer, Lambert             | Lambert Hillyer     | tt0038868        |
| 1746514911        | 1923        | 1923        | Dundee-Criqui Boxing Exhibition    | Dundee Criqui Boxing Exhibition    |                              |                     | tt1032865        |
| 1745309513        | 2005        | 2005        | Kids in America                    | Kids in America                    | Stolberg, Josh               | Josh Stolberg       | tt0408961        |
| 1746491985        | 1947        | 1947        | Land of the Lawless                | Land of the Lawless                | Hillyer, Lambert             | Lambert Hillyer     | tt0039548        |
| 1746524923        | 1923        | 1923        | The Lone Wagon                     | The Lone Wagon                     | Mattison, Frank S.           | Frank S. Mattison   | tt0133933        |
| 1746453781        | 1941        | 1940        | San Francisco Docks                | San Francisco Docks                | Lubin, Arthur                | Arthur Lubin        | tt0034149        |
| 1746438200        | 1996        | 1996        | Black Sheep                        | Black Sheep                        | Spheeris, Penelope           | Penelope Spheeris   | tt0115697        |
| 1745293654        | 2005        | 2005        | Brokeback Mountain                 | Brokeback Mountain                 | Lee, Ang                     | Ang Lee             | tt0388795        |
| 1746578565        | 1963        | 1963        | For Love or Money                  | For Love or Money                  | Gordon, Michael              | Michael Gordon      | tt0057067        |
| 1745309119        | 2007        | 2007        | Disturbia                          | Disturbia                          | Caruso, D. J.                | D.J. Caruso         | tt0486822        |
| 1746520438        | 1949        | 1949        | The Last Bandit                    | The Last Bandit                    | Kane, Joseph                 | Joseph Kane         | tt0041578        |
| 1746585235        | 1930        | 1930        | Africa Speaks                      | Africa Speaks!                     |                              | Walter Futter       | tt0174450        |
| 1746569503        | 1955        | 1955        | Death Tide                         | Death Tide                         | Komow, Victor H.             | Victor Komow        | tt0301172        |
| 1746582967        | 1935        | 1935        | Les Misérables                     | Les Misérables                     | Boleslawski, Richard         | Richard Boleslawski | tt0026725        |
| 1746410705        | 1986        | 1986        | Police Academy 3: Back in Training | Police Academy 3: Back in Training | Paris, Jerry                 | Jerry Paris         | tt0091777        |
| 1746566988        | 1933        | 1933        | Hello, Everybody!                  | Hello, Everybody!                  | Seiter, William A.           | William A. Seiter   | tt0024103        |
| 1769970681        | 1968        | 1968        | See How They Come                  | See How They Come                  | Hennigar, William K.         | William K. Hennigar | tt0257126        |
| 1746184150        | 1910        | 1910        | Big Elk's Turndown                 | Big Elk's Turndown                 |                              | Kenean Buel         | tt1930293        |
| 1746467186        | 1917        | 1917        | The Charmer                        | The Charmer                        | Conway, Jack                 | Jack Conway         | tt0007784        |
| 1746524975        | 1915        | 1915        | Sold                               | Sold                               | Porter, Edwin S.; Ford, Hugh | Hugh Ford           | tt0006064        |
| 1746575060        | 1936        | 1936        | Snowed Under                       | Snowed Under                       | Enright, Raymond             | Ray Enright         | tt0028272        |

|            |      |      |                                 |                                 |                                  |                      |           |
|------------|------|------|---------------------------------|---------------------------------|----------------------------------|----------------------|-----------|
| 1746503435 | 1920 | 1920 | Rouge and Riches                | Rouge and Riches                | Franklin, Harry L.               | Harry L. Franklin    | tt0011646 |
| 1745394109 | 2008 | 2008 | Doomsday                        | Doomsday                        | Marshall, Neil                   | Neil Marshall        | tt0483607 |
| 1746582037 | 1928 | 1928 | Red Gold                        | Red Gold                        |                                  | Ben F. Wilson        | tt0021290 |
| 1746514744 | 1922 | 1922 | The Cowboy King                 | The Cowboy King                 | Seeling, Charles R.              | Charles R. Seeling   | tt0013029 |
| 1746524867 | 1916 | 1916 | The Clarion                     | The Clarion                     | Durkin, James                    | James Durkin         | tt0157471 |
| 1746422639 | 1993 | 1993 | Money for Nothing               | Money for Nothing               | Menendez, Ramon                  | Ramón Menéndez       | tt0107594 |
| 1746509292 | 1925 | 1925 | Morals for Men                  | Morals for Men                  | Hyman, Bernard                   | Bernard H. Hyman     | tt0016125 |
| 1746498265 | 1919 | 1919 | The Hoodlum                     | The Hoodlum                     | Franklin, Sidney A.              | Sidney Franklin      | tt0010267 |
| 1746500009 | 1924 | 1924 | The Sword of Valor              | The Sword of Valor              | Worne, Duke                      | Duke Worne           | tt0015383 |
| 1746423490 | 1998 | 1998 | The Replacement Killers         | The Replacement Killers         | Fuqua, Antoine                   | Antoine Fuqua        | tt0120008 |
| 1746578942 | 1961 | 1961 | Erotica                         | Erotica                         | Meyer, Russ                      | Russ Meyer           | tt0054852 |
| 1746219011 | 1974 | 1974 | A Woman Under the Influence     | A Woman Under the Influence     | Cassavetes, John                 | John Cassavetes      | tt0072417 |
| 1746420881 | 1993 | 1993 | CB4                             | CB4                             | Davis, Tamra                     | Tamra Davis          | tt0106500 |
| 1746511764 | 1916 | 1916 | The Path of Happiness           | The Path of Happiness           |                                  | Elaine S. Carrington | tt0007159 |
| 1746491714 | 1945 | 1945 | Utah                            | Utah                            | English, John                    | John English         | tt0038212 |
| 1746575015 | 1935 | 1935 | Speed Limited                   | Speed Limited                   | Herman, Al                       | Albert Herman        | tt0033087 |
| 1746438950 | 1943 | 1943 | Sarong Girl                     | Sarong Girl                     | Dreifuss, Arthur                 | Arthur Dreifuss      | tt0035289 |
| 1746504393 | 1918 | 1918 | You Can't Believe Everything    | You Can't Believe Everything    | Conway, Jack                     | Jack Conway          | tt0009843 |
| 1746475979 | 1948 | 1948 | Moonrise                        | Moonrise                        | Borzage, Frank                   | Frank Borzage        | tt0040607 |
| 1746453458 | 1943 | 1943 | Dr. Gillespie's Criminal Case   | Dr. Gillespie's Criminal Case   | Goldbeck, Willis                 | Willis Goldbeck      | tt0035826 |
| 1746561029 | 1932 | 1932 | With Williamson Beneath the Sea | With Williamson Beneath the Sea | Williamson, J. E.                | J.E. Williamson      | tt1270705 |
| 1746520529 | 1950 | 1950 | Call of the Klondike            | Call of the Klondike            | McDonald, Frank                  | Frank McDonald       | tt0042300 |
| 1746394239 | 1987 | 1987 | Cold Steel                      | Cold Steel                      | Puzo, Dorothy Ann                | Dorothy Ann Puzo     | tt0092767 |
| 1746581527 | 1928 | 1928 | Show Girl                       | Show Girl                       | Santell, Alfred                  | Alfred Santell       | tt0019378 |
| 1746582793 | 1938 | 1938 | Arson Gang Busters              | Arson Gang Busters              | Kane, Joe                        | Joseph Kane          | tt0029882 |
| 1746475730 | 1945 | 1945 | Eadie Was a Lady                | Eadie Was a Lady                | Dreifuss, Arthur                 | Arthur Dreifuss      | tt0037663 |
| 1746577874 | 1938 | 1937 | Lady Behave!                    | Lady Behave!                    | Corrigan, Lloyd                  | Lloyd Corrigan       | tt0029102 |
| 1745373547 | 2001 | 2001 | The Fluffer                     | The Fluffer                     | Glatzer, Richard; West, Wash     | Richard Glatzer      | tt0245115 |
| 1745359034 | 2003 | 2003 | Honey                           | Honey                           | Woodruff, Bille                  | Bille Woodruff       | tt0322589 |
| 1746583953 | 1930 | 1930 | Song of the Caballero           | Song of the Caballero           | Brown, Harry J.                  | Harry Joe Brown      | tt0021403 |
| 1745359553 | 2001 | 2001 | Monster's Ball                  | Monster's Ball                  | Forster, Marc                    | Marc Forster         | tt0285742 |
| 1746474134 | 1948 | 1948 | The Dude Goes West              | The Dude Goes West              | Neumann, Kurt                    | Kurt Neumann         | tt0040305 |
| 1769975762 | 1918 | 1918 | In and Out                      | In and Out                      | Seiter, William A.               | William A. Seiter    | tt1312977 |
| 1746573685 | 1931 | 1931 | Husband's Holiday               | Husband's Holiday               | Milton, Robert                   | Robert Milton        | tt0023039 |
| 1746584357 | 1939 | 1939 | The Lady's from Kentucky        | The Lady's from Kentucky        | Hall, Alexander                  | Alexander Hall       | tt0031550 |
| 1745340442 | 2001 | 2001 | The Curse of the Jade Scorpion  | The Curse of the Jade Scorpion  | Allen, Woody                     | Woody Allen          | tt0256524 |
| 1746584605 | 1931 | 1931 | Mystery Train                   | The Mystery Train               | Whitman, Phil                    | Phil Whitman         | tt0022181 |
| 1746555813 | 1954 | 1954 | Shield for Murder               | Shield for Murder               | O'Brien, Edmond; Koch, Howard W. | Howard W. Koch       | tt0047479 |
| 1746464863 | 1942 | 1942 | Bullets for Bandits             | Bullets for Bandits             | Fox, Wallace W.                  | Wallace Fox          | tt0034557 |
| 1746520760 | 1925 | 1925 | Old Clothes                     | Old Clothes                     | Cline, Edward                    | Edward F. Cline      | tt0016174 |
| 1746585088 | 1930 | 1930 | Monte Carlo                     | Monte Carlo                     | Lubitsch, Ernst                  | Ernst Lubitsch       | tt0021153 |
| 1746585402 | 1940 | 1940 | Hired Wife                      | Hired Wife                      | Seiter, William A.               | William A. Seiter    | tt0032596 |
| 1746582000 | 1928 | 1928 | The Boss of Rustler's Roost     | The Boss of Rustler's Roost     | Maloney, Leo                     | Leo D. Maloney       | tt0018716 |
| 1746508887 | 1925 | 1925 | Lady Robinhood                  | Lady Robinhood                  | Ince, Ralph                      | Ralph Ince           | tt0016002 |
| 1746423052 | 1994 | 1994 | Color of Night                  | Color of Night                  | Rush, Richard                    | Richard Rush         | tt0109456 |
| 1746454833 | 1944 | 1944 | Bowery to Broadway              | Bowery to Broadway              | Lamont, Charles                  | Charles Lamont       | tt0036668 |
| 1746584130 | 1934 | 1934 | The Countess of Monte Cristo    | The Countess of Monte Cristo    | Freund, Karl                     | Karl Freund          | tt0025005 |
| 1746565969 | 1957 | 1957 | Duel at Apache Wells            | Duel at Apache Wells            | Kane, Joe                        | Joseph Kane          | tt0050343 |
| 1746583458 | 1931 | 1931 | Mounted Fury                    | Mounted Fury                    | Paton, Stuart                    | Stuart Paton         | tt0022166 |
| 1746573620 | 1931 | 1931 | Just a Gigolo                   | Just a Gigolo                   | Conway, Jack                     | Jack Conway          | tt0021780 |
| 1746393956 | 1985 | 1985 | Lust in the Dust                | Lust in the Dust                | Bartel, Paul                     | Paul Bartel          | tt0089523 |
| 1746500406 | 1925 | 1925 | The Desert Demon                | The Desert Demon                | Thorpe, Richard                  | Richard Thorpe       | tt0015744 |
| 1746467839 | 1917 | 1917 | The Boy Girl                    | The Boy Girl                    | Stevens, Edwin                   | Edwin Stevens        | tt0007743 |
| 1746454039 | 1941 | 1941 | Pacific Blackout                | Pacific Blackout                | Murphy, Ralph                    | Ralph Murphy         | tt0033993 |
| 1746454464 | 1943 | 1943 | Campus Rhythm                   | Campus Rhythm                   | Dreifuss, Arthur                 | Arthur Dreifuss      | tt0035710 |
| 1746583380 | 1930 | 1930 | The Golf Specialist             | The Golf Specialist             | Brice, Monte                     | Monte Brice          | tt0020927 |
| 1746424248 | 1941 | 1941 | Gauchos of Eldorado             | Gauchos of El Dorado            | Orlebeck, Les                    | Lester Orlebeck      | tt0033649 |

|            |      |      |                                             |                                            |                                  |                     |           |
|------------|------|------|---------------------------------------------|--------------------------------------------|----------------------------------|---------------------|-----------|
| 1745357896 | 2008 | 2008 | Sex Drive                                   | Sex Drive                                  | Anders, Sean                     | Sean Anders         | tt1135985 |
| 1746584684 | 1928 | 1928 | The Barker                                  | The Barker                                 | Fitzmaurice, George              | George Fitzmaurice  | tt0018674 |
| 1746567520 | 1932 | 1932 | The Night of June 13                        | The Night of June 13                       | Roberts, Stephen                 | Stephen Roberts     | tt0023272 |
| 1746571602 | 1932 | 1932 | Hell-Fire Austin                            | Hell Fire Austin                           | Sheldon, Forrest                 | Forrest Sheldon     | tt0022988 |
| 1746466951 | 1917 | 1916 | The Final Payment                           | The Final Payment                          | Powell, Frank                    | Wilbert Melville    | tt0921809 |
| 1746568020 | 1933 | 1933 | Tomorrow at Seven                           | Tomorrow at Seven                          | Enright, Ray                     | Ray Enright         | tt0024679 |
| 1746503415 | 1918 | 1918 | Her Boy                                     | Her Boy                                    | Irving, George                   | George Irving       | tt0009160 |
| 1746582174 | 1928 | 1928 | The Water Hole                              | The Water Hole                             | Jones, F. Richard                | F. Richard Jones    | tt0019550 |
| 1746585107 | 1929 | 1929 | Chasing Through Europe                      | Chasing Through Europe                     | Butler, David; Werker, Alfred L. | David Butler        | tt0019759 |
| 1746567619 | 1932 | 1932 | Wild Girl                                   | Wild Girl                                  | Walsh, Raoul                     | Raoul Walsh         | tt0023700 |
| 1746208605 | 1969 | 1969 | Goodbye, Mr. Chips                          | Goodbye, Mr. Chips                         | Ross, Herbert                    | Herbert Ross        | tt0064382 |
| 1745293941 | 2006 | 2006 | 10th & Wolf                                 | 10th & Wolf                                | Moresco, Bobby                   | Bobby Moresco       | tt0360323 |
| 1746492551 | 1948 | 1948 | Luxury Liner                                | Luxury Liner                               | Whorf, Richard                   | Richard Whorf       | tt0040556 |
| 1746585353 | 1929 | 1929 | The Trial of Mary Dugan                     | The Trial of Mary Dugan                    | Veiller, Bayard                  | Bayard Veiller      | tt0020516 |
| 1746580476 | 1935 | 1935 | The Arizonian                               | The Arizonian                              | Vidor, Charles                   | Charles Vidor       | tt0026082 |
| 1746235607 | 1974 | 1974 | Claudine                                    | Claudine                                   | Berry, John                      | John Berry          | tt0071334 |
| 1746392764 | 1982 | 1982 | Some Kind of Hero                           | Some Kind of Hero                          | Pressman, Michael                | Michael Pressman    | tt0083107 |
| 1746581218 | 1951 | 1951 | Fixed Bayonets!                             | Fixed Bayonets!                            | Fuller, Samuel                   | Samuel Fuller       | tt0043540 |
| 1746423458 | 1997 | 1997 | In & Out                                    | In & Out                                   | Oz, Frank                        | Frank Oz            | tt0119360 |
| 1746520773 | 1926 | 1926 | The Nervous Wreck                           | The Nervous Wreck                          | Sidney, Scott                    | Scott Sidney        | tt0017201 |
| 1746438291 | 1943 | 1943 | The Ghost Rider                             | The Ghost Rider                            | Fox, Wallace W.                  | Wallace Fox         | tt0035936 |
| 1746234764 | 1966 | 1966 | Incident at Phantom Hill                    | Incident at Phantom Hill                   | Bellamy, Earl                    | Earl Bellamy        | tt0060537 |
| 1746555466 | 1957 | 1956 | On the Bowery                               | On the Bowery                              | Rogosin, Lionel                  | Lionel Rogosin      | tt0050800 |
| 1746438324 | 1943 | 1943 | Silver Spurs                                | Silver Spurs                               | Kane, Joseph                     | Joseph Kane         | tt0036357 |
| 1746509242 | 1926 | 1926 | The Call of the Klondike                    | The Call of the Klondike                   | Apfel, Oscar                     | Oscar Apfel         | tt0016701 |
| 1746579019 | 1960 | 1960 | The Mountain Road                           | The Mountain Road                          | Mann, Daniel                     | Daniel Mann         | tt0054095 |
| 1746584855 | 1929 | 1929 | One Stolen Night                            | One Stolen Night                           | Dunlap, Scott R.                 | Scott R. Dunlap     | tt0020243 |
| 1746525146 | 1920 | 1920 | The Cyclone                                 | The Cyclone                                | Smith, Cliff                     | Clifford Smith      | tt0011086 |
| 1746570395 | 1952 | 1952 | The Girl in White                           | The Girl in White                          | Sturges, John                    | John Sturges        | tt0044663 |
| 1746439724 | 1999 | 1999 | Lost & Found                                | Lost & Found                               | Pollack, Jeff                    | Jeff Pollack        | tt0120836 |
| 1746563485 | 1952 | 1952 | Shadow in the Sky                           | Shadow in the Sky                          | Wilcox, Fred M.                  | Fred M. Wilcox      | tt0044027 |
| 1746500095 | 1924 | 1924 | Black Gold                                  | Black Gold                                 | Sheldon, Forrest                 | Forrest Sheldon     | tt0014719 |
| 1746585480 | 1940 | 1940 | Blondie on a Budget                         | Blondie on a Budget                        | Strayer, Frank R.                | Frank R. Strayer    | tt0032263 |
| 1746394669 | 1985 | 1985 | Death Wish 3                                | Death Wish 3                               | Winner, Michael                  | Michael Winner      | tt0089003 |
| 1746561019 | 1932 | 1932 | Million Dollar Legs                         | Million Dollar Legs                        | Cline, Edward                    | Edward F. Cline     | tt0023225 |
| 1746584893 | 1940 | 1940 | Rainbow over the Range                      | Rainbow Over the Range                     | Herman, Al                       | Albert Herman       | tt0032966 |
| 1746532717 | 1916 | 1916 | Lovely Mary                                 | Lovely Mary                                | Jones, Edgar                     | Edgar Jones         | tt0006958 |
| 1746210513 | 1972 | 1972 | "Everything You Always Wanted to Know About | Everything You Always Wanted to Know About | Allen, Woody                     | Woody Allen         | tt0068555 |
| 1746562061 | 1954 | 1954 | Rose Marie                                  | Rose Marie                                 | LeRoy, Mervyn                    | Mervyn LeRoy        | tt0047429 |
| 1746433889 | 1995 | 1995 | Top Dog                                     | Top Dog                                    | Norris, Aaron                    | Aaron Norris        | tt0114697 |
| 1746532761 | 1923 | 1923 | Souls in Bondage                            | Souls in Bondage                           | Clifford, William H.             | William H. Clifford | tt0165952 |
| 1746581640 | 1928 | 1928 | United States Smith                         | United States Smith                        | Henabery, Joseph                 | Joseph Henabery     | tt0019512 |
| 1746409512 | 1990 | 1990 | Bird on a Wire                              | Bird on a Wire                             | Badham, John                     | John Badham         | tt0099141 |
| 1746584961 | 1940 | 1940 | East Side Kids                              | East Side Kids                             | Hill, Robert                     | Robert F. Hill      | tt0032428 |
| 1746574790 | 1937 | 1937 | She's No Lady                               | She's No Lady                              | Vidor, Charles                   | Charles Vidor       | tt0029552 |
| 1746525052 | 1920 | 1920 | Roman Candles                               | Roman Candles                              | Pratt, Jack                      | Jack Pratt          | tt0013793 |
| 1746574506 | 1935 | 1935 | The New Frontier                            | The New Frontier                           | Pierson, Carl L.                 | Carl Pierson        | tt0026774 |
| 1746523057 | 1916 | 1916 | Behind the Lines                            | Behind the Lines                           | McRae, Henry                     | Henry MacRae        | tt0006413 |
| 1746465191 | 1947 | 1947 | The Fighting Vigilantes                     | The Fighting Vigilantes                    | Taylor, Ray                      | Ray Taylor          | tt0039380 |
| 1746497940 | 1921 | 1921 | Footlights                                  | Footlights                                 | Robertson, John S.               | John S. Robertson   | tt0012185 |
| 1745359938 | 2002 | 2002 | Big Fat Liar                                | Big Fat Liar                               | Levy, Shawn                      | Shawn Levy          | tt0265298 |
| 1746582978 | 1938 | 1938 | Adventure in Sahara                         | Adventure in Sahara                        | Lederman, D. Ross                | D. Ross Lederman    | tt0029841 |
| 1746454042 | 1943 | 1943 | Clancy Street Boys                          | Clancy Street Boys                         | Beaudine, William                | William Beaudine    | tt0035741 |
| 1746570131 | 1934 | 1934 | Belle of the Nineties                       | Belle of the Nineties                      | McCarey, Leo                     | Leo McCarey         | tt0024873 |
| 1746503654 | 1919 | 1919 | The Law of Nature                           | The Law of Nature                          | Fischer, David G.                | David G. Fischer    | tt0190523 |
| 1746569983 | 1956 | 1956 | Gun Brothers                                | Gun Brothers                               | Salkow, Sidney                   | Sidney Salkow       | tt0049283 |
| 1746574675 | 1937 | 1938 | Assassin of Youth                           | Assassin of Youth                          | Clifton, Elmer                   | Elmer Clifton       | tt0028589 |



|            |      |      |                             |                             |                                     |                         |           |
|------------|------|------|-----------------------------|-----------------------------|-------------------------------------|-------------------------|-----------|
| 1746499858 | 1947 | 1947 | Ride the Pink Horse         | Ride the Pink Horse         | Montgomery, Robert                  | Robert Montgomery       | tt0039768 |
| 1746571592 | 1932 | 1932 | Harlem Is Heaven            | Harlem Is Heaven            | Franklyn, Irwin R.                  | Irwin Franklyn          | tt0022976 |
| 1746523043 | 1915 | 1915 | Chimmie Fadden Out West     | Chimmie Fadden Out West     | DeMille, Cecil B.                   | Cecil B. DeMille        | tt0005087 |
| 1746453495 | 1943 | 1943 | Keep 'Em Slugging           | Keep 'Em Slugging           | Cabanne, Christy                    | Christy Cabanne         | tt0036069 |
| 1746438938 | 1943 | 1943 | Fired Wife                  | Fired Wife                  | Lamont, Charles                     | Charles Lamont          | tt0035880 |
| 1746524811 | 1916 | 1916 | The Wheel of the Law        | The Wheel of the Law        | Baker, George D.                    | George D. Baker         | tt0159123 |
| 1746502657 | 1915 | 1915 | The Bulldogs of the Trail   | The Bulldogs of the Trail   | MacDougall, Kenneth                 | Kenneth MacDougall      | tt0005035 |
| 1746210199 | 1971 | 1971 | The Brotherhood of Satan    | The Brotherhood of Satan    | McEveety, Bernard                   | Bernard McEveety        | tt0066863 |
| 1746465082 | 1947 | 1947 | Northwest Outpost           | Northwest Outpost           | Dwan, Allan                         | Allan Dwan              | tt0039667 |
| 1746454850 | 1941 | 1941 | One Foot in Heaven          | One Foot in Heaven          | Rapper, Irving                      | Irving Rapper           | tt0033980 |
| 1746508144 | 1925 | 1925 | Ermine and Rhinestones      | Ermine and Rhinestones      | King, Burton                        | Burton L. King          | tt0015782 |
| 1746545285 | 1940 | 1940 | Riders from Nowhere         | Riders from Nowhere         | Johnson, Raymond K.                 | Bernard B. Ray          | tt0032988 |
| 1746508924 | 1926 | 1926 | The Fighting Marine         | The Fighting Marine         | Bennett, Spencer Gordon             | Spencer Gordon Bennet   | tt0016864 |
| 1746420251 | 1989 | 1989 | When Harry Met Sally...     | When Harry Met Sally...     | Reiner, Rob                         | Rob Reiner              | tt0098635 |
| 1746409978 | 1989 | 1988 | Miracle Mile                | Miracle Mile                | De Jarnatt, Steve                   | Steve De Jarnatt        | tt0097889 |
| 1746585356 | 1940 | 1940 | Flight Command              | Flight Command              | Borzage, Frank                      | Frank Borzage           | tt0032477 |
| 1746525091 | 1919 | 1919 | Beckoning Roads             | Beckoning Roads             | Hickman, Howard                     | Howard C. Hickman       | tt0186861 |
| 1746424222 | 1943 | 1943 | The Amazing Mrs. Holliday   | The Amazing Mrs. Holliday   | Manning, Bruce; Renoir, Jean        | Bruce Manning           | tt0035631 |
| 1746561262 | 1932 | 1932 | The Devil Is Driving        | The Devil Is Driving        | Stoloff, Ben                        | Benjamin Stoloff        | tt0022815 |
| 1746492454 | 1946 | 1946 | Strange Triangle            | Strange Triangle            | McCarey, Ray                        | Ray McCarey             | tt0038989 |
| 1746583539 | 1951 | 1951 | The Hoodlum                 | The Hoodlum                 | Nosseck, Max                        | Max Nosseck             | tt0043655 |
| 1746572413 | 1932 | 1932 | Chandu the Magician         | Chandu the Magician         | Varnel, Marcel; Menzies, William C. | William Cameron Menzies | tt0022753 |
| 1746570140 | 1934 | 1934 | Smarty                      | Smarty                      | Florey, Robert                      | Robert Florey           | tt0025803 |
| 1746559938 | 1964 | 1964 | Kiss Me, Stupid             | Kiss Me, Stupid             | Wilder, Billy                       | Billy Wilder            | tt0058265 |
| 1746577463 | 1959 | 1959 | Riot in Juvenile Prison     | Riot in Juvenile Prison     | Cahn, Edward L.                     | Edward L. Cahn          | tt0053222 |
| 1746453492 | 1945 | 1945 | Gaslight Follies            | Gaslight Follies            |                                     | Albert Herman           | tt0037732 |
| 1746569921 | 1957 | 1957 | Calypso Joe                 | Calypso Joe                 | Dein, Edward                        | Edward Dein             | tt0050223 |
| 1746219338 | 1972 | 1972 | Beware! the Blob            | Beware! The Blob            | Hagman, Larry                       | Larry Hagman            | tt0068271 |
| 1746491718 | 1948 | 1948 | River Lady                  | River Lady                  | Sherman, George                     | George Sherman          | tt0040738 |
| 1746532611 | 1923 | 1923 | The Sunshine Trail          | The Sunshine Trail          | Horne, James W.                     | James W. Horne          | tt0013647 |
| 1746577295 | 1962 | 1962 | Carnival of Souls           | Carnival of Souls           | Harvey, Herk                        | Herk Harvey             | tt0055830 |
| 1746583737 | 1931 | 1931 | I Like Your Nerve           | I Like Your Nerve           | McGann, William                     | William C. McGann       | tt0021986 |
| 1746487346 | 1917 | 1917 | To-Day                      | To Day                      | Ince, Ralph W.                      | Ralph Ince              | tt0183901 |
| 1746583041 | 1936 | 1936 | Adventure in Manhattan      | Adventure in Manhattan      | Ludwig, Edward                      | Edward Ludwig           | tt0027258 |
| 1746497069 | 1919 | 1919 | Behind the Door             | Behind the Door             | Willat, Irvin V.                    | Irvin Willat            | tt0009915 |
| 1746583348 | 1931 | 1931 | The Hard Hombre             | The Hard Hombre             | Brower, Otto                        | Otto Brower             | tt0021940 |
| 1746435180 | 1943 | 1943 | Murder on the Waterfront    | Murder on the Waterfront    | Eason, B. Reeves                    | B. Reeves Eason         | tt0036181 |
| 1746500205 | 1924 | 1924 | Barbara Frietchie           | Barbara Frietchie           | Hillyer, Lambert                    | Lambert Hillyer         | tt0014696 |
| 1746497231 | 1917 | 1916 | The Dummy                   | The Rummy                   | Grandon, Francis J.                 | Paul Powell             | tt0007277 |
| 1746464814 | 1941 | 1941 | Billy the Kid in Santa Fe   | Billy the Kid in Santa Fe   | Scott, Sherman                      | Sam Newfield            | tt0033392 |
| 1746563217 | 1952 | 1952 | Yukon Gold                  | Yukon Gold                  | McDonald, Frank                     | Frank McDonald          | tt0122324 |
| 1746576310 | 1931 | 1931 | Quick Trigger Lee           | Quick Trigger Lee           | McGowan, J. P.                      | J.P. McGowan            | tt0022291 |
| 1746565998 | 1956 | 1956 | Singing in the Dark         | Singing in the Dark         | Nosseck, Max                        | Max Nosseck             | tt0049760 |
| 1746573989 | 1959 | 1959 | Green Mansions              | Green Mansions              | Ferrer, Mel                         | Mel Ferrer              | tt0052864 |
| 1746524798 | 1910 | 1910 | The Romance of Circle Ranch | The Romance of Circle Ranch |                                     | William F. Haddock      | tt2239178 |
| 1746566310 | 1953 | 1953 | Vicki                       | Vicki                       | Horner, Harry                       | Harry Horner            | tt0046515 |
| 1746532812 | 1923 | 1923 | Souls for Sale              | Souls for Sale              | Hughes, Rupert                      | Rupert Hughes           | tt0014497 |
| 1746503858 | 1917 | 1917 | The Promise                 | The Promise                 | Balshofer, Fred J.                  | Jay Hunt                | tt0008468 |
| 1746455802 | 1998 | 1998 | Caught Up                   | Caught Up                   | Scott, Darin                        | Darin Scott             | tt0119988 |
| 1745374980 | 2009 | 2009 | Race to Witch Mountain      | Race to Witch Mountain      | Fickman, Andy                       | Andy Fickman            | tt1075417 |
| 1746578880 | 1951 | 1951 | My Outlaw Brother           | My Outlaw Brother           | Nugent, Elliott                     | Elliott Nugent          | tt0043829 |
| 1746532813 | 1927 | 1927 | Cross Breed                 | Cross Breed                 | Smith, Noel Mason                   | Noel M. Smith           | tt0017782 |
| 1745393671 | 2010 | 2010 | Beneath the Dark            | Beneath the Dark            | Feehan, Chad                        | Chad Feehan             | tt1422800 |
| 1746514113 | 1915 | 1915 | The Pitfall                 | The Pitfall                 | Horne, James W.                     | James W. Horne          | tt0005900 |
| 1745357708 | 2002 | 2002 | The Time Machine            | The Time Machine            | Wells, Simon                        | Simon Wells             | tt0268695 |
| 1746502935 | 1923 | 1923 | Broadway Broke              | Broadway Broke              | Dawley, J. Searle                   | J. Searle Dawley        | tt0013894 |
| 1746500443 | 1949 | 1950 | Riders of the Range         | Riders of the Range         | Selander, Lesley                    | Lesley Selander         | tt0042892 |

|            |      |      |                                   |                                   |                              |                                     |           |
|------------|------|------|-----------------------------------|-----------------------------------|------------------------------|-------------------------------------|-----------|
| 1746497571 | 1917 | 1917 | A Wife on Trial                   | A Wife on Trial                   | Baldwin, Ruth Ann            | Ruth Ann Baldwin                    | tt0008773 |
| 1746500598 | 1948 | 1948 | Strike It Rich                    | Strike It Rich                    | Selander, Leslie             | Lesley Selander                     | tt0040845 |
| 1746566004 | 1957 | 1957 | Sweet Smell of Success            | Sweet Smell of Success            | Mackendrick, Alexander       | Alexander Mackendrick               | tt0051036 |
| 1746422518 | 1996 | 1996 | Dear God                          | Dear God                          | Marshall, Garry              | Garry Marshall                      | tt0116059 |
| 1746438296 | 1944 | 1944 | Law of the Valley                 | Law of the Valley                 | Bretherton, Howard           | Howard Bretherton                   | tt0037011 |
| 1746580822 | 1936 | 1936 | Gun Grit                          | Gun Grit                          |                              | William Berke                       | tt0027706 |
| 1746584892 | 1939 | 1939 | Within the Law                    | Within the Law                    | Machaty, Gustav              | Gustav Machaty                      | tt0032135 |
| 1746567615 | 1932 | 1932 | It Happened in Paris              | It Happened in Paris              | Weisfeldt, M. J.             | M.J. Weisfeldt                      | tt0945569 |
| 1746582899 | 1938 | 1938 | Numbered Woman                    | Numbered Woman                    | Brown, Karl                  | Karl Brown                          | tt0030513 |
| 1746572531 | 1910 | 1910 | A Flirty Affliction               | A Flirty Affliction               |                              | Gilbert M. 'Broncho Billy' Anderson | tt0372284 |
| 1746582886 | 1936 | 1936 | The Glory Trail                   | The Glory Trail                   | Shores, Lynn                 | Lynn Shores                         | tt0027682 |
| 1746474143 | 1946 | 1946 | Swamp Fire                        | Swamp Fire                        | Pine, William H.             | William H. Pine                     | tt0039001 |
| 1746567317 | 1952 | 1952 | Outlaw Women                      | Outlaw Women                      | Newfield, Sam; Ormond, Ron   | Sam Newfield                        | tt0045004 |
| 1746492079 | 1944 | 1944 | Dead or Alive                     | Dead or Alive                     | Clifton, Elmer               | Elmer Clifton                       | tt0036750 |
| 1746520964 | 1949 | 1949 | Make Believe Ballroom             | Make Believe Ballroom             | Santley, Joseph              | Joseph Santley                      | tt0041620 |
| 1746200243 | 1966 | 1966 | Maya                              | Maya                              | Berry, John                  | John Berry                          | tt0060681 |
| 1746509558 | 1926 | 1926 | Puppets                           | Puppets                           | Archainbaud, George          | George Archainbaud                  | tt0017297 |
| 1746496993 | 1918 | 1918 | The Light Within                  | The Light Within                  | Trimble, Larry               | Laurence Trimble                    | tt0009300 |
| 1746580689 | 1938 | 1938 | Rio Grande                        | Rio Grande                        | Nelson, Sam                  | Sam Nelson                          | tt0031864 |
| 1746508037 | 1926 | 1926 | Paths of Flame                    | Paths of Flame                    |                              |                                     | tt0147155 |
| 1746523994 | 1910 | 1910 | A New Divorce Cure                | A New Divorce Cure                |                              |                                     | tt0352633 |
| 1746577919 | 1937 | 1937 | The Life of the Party             | The Life of the Party             | Seiter, William A.           | William A. Seiter                   | tt0029145 |
| 1746504413 | 1919 | 1919 | The Broken Melody                 | The Broken Melody                 | Earle, William P. S.         | William P.S. Earle                  | tt0187759 |
| 1746465012 | 1944 | 1944 | Rainbow Island                    | Rainbow Island                    | Murphy, Ralph; Tuttle, Frank | Ralph Murphy                        | tt0037208 |
| 1746410452 | 1983 | 1983 | Brainstorm                        | Brainstorm                        | Trumbull, Douglas            | Douglas Trumbull                    | tt0085271 |
| 1746574167 | 1963 | 1963 | A New Kind of Love                | A New Kind of Love                | Shavelson, Melville          | Melville Shavelson                  | tt0057360 |
| 1746554073 | 1963 | 1963 | The Ceremony                      | The Ceremony                      | Harvey, Laurence             | Laurence Harvey                     | tt0056918 |
| 1746217856 | 1967 | 1967 | Hot Rods to Hell                  | Hot Rods to Hell                  | Brahm, John                  | John Brahm                          | tt0061784 |
| 1746555033 | 1955 | 1955 | Double Jeopardy                   | Double Jeopardy                   | Springsteen, R. G.           | R.G. Springsteen                    | tt0046927 |
| 1746218242 | 1967 | 1967 | A Covenant With Death             | A Covenant with Death             | Johnson, Lamont              | Lamont Johnson                      | tt0061525 |
| 1746583275 | 1951 | 1951 | Insurance Investigator            | Insurance Investigator            | Blair, George                | George Blair                        | tt0128271 |
| 1746381966 | 1981 | 1981 | Blow Out                          | Blow Out                          | De Palma, Brian              | Brian De Palma                      | tt0082085 |
| 1746516274 | 1919 | 1919 | The She Wolf                      | The She Wolf                      | Smith, Cliff                 | Clifford Smith                      | tt0192597 |
| 1746576898 | 1932 | 1932 | Letty Lynton                      | Letty Lynton                      | Brown, Clarence              | Clarence Brown                      | tt0023132 |
| 1746520844 | 1925 | 1925 | Soul-Fire                         | Soul Fire                         | Robertson, John S.           | John S. Robertson                   | tt0016377 |
| 1746487140 | 1920 | 1920 | What Women Want                   | What Women Want                   | Archainbaud, George          | George Archainbaud                  | tt0011849 |
| 1746583474 | 1931 | 1930 | Viennese Nights                   | Viennese Nights                   | Crosland, Alan               | Alan Crosland                       | tt0021522 |
| 1746249059 | 1973 | 1973 | Running with the Devil            | Running with the Devil            | Sullivan, Ron                | Henri Pachard                       | tt0314595 |
| 1746569576 | 1958 | 1958 | Juvenile Jungle                   | Juvenile Jungle                   | Witney, William              | William Witney                      | tt0051805 |
| 1746580625 | 1938 | 1938 | The Jury's Secret                 | The Jury's Secret                 | Sloman, Edward               | Edward Sloman                       | tt0030301 |
| 1746524136 | 1923 | 1923 | Why Women Remarry                 | Why Women Remarry                 | Gorman, John                 | John Gorman                         | tt0014610 |
| 1746492713 | 1948 | 1948 | Michael O'Halloran                | Michael O'Halloran                | Rawlins, John                | John Rawlins                        | tt0040584 |
| 1746520286 | 1924 | 1924 | Baffled                           | Baffled                           | McGowan, J. P.               | J.P. McGowan                        | tt0014693 |
| 1746566329 | 1958 | 1958 | Ghost of the China Sea            | Ghost of the China Sea            | Sears, Fred F.               | Fred F. Sears                       | tt0051653 |
| 1746571569 | 1931 | 1931 | The Hot Heiress                   | The Hot Heiress                   | Badger, Clarence             | Clarence G. Badger                  | tt0021973 |
| 1746582868 | 1937 | 1937 | A Star Is Born                    | A Star Is Born                    | Wellman, William A.          | William A. Wellman                  | tt0029606 |
| 1746514375 | 1915 | 1915 | Up from the Depths                | Up from the Depths                | Powell, Paul                 | Paul Powell                         | tt0146334 |
| 1746570606 | 1933 | 1933 | Sailor Be Good!                   | Sailor Be Good                    | Cruze, James                 | James Cruze                         | tt0024517 |
| 1746186197 | 1967 | 1967 | Who's Minding the Mint?           | Who's Minding the Mint?           | Morris, Howard               | Howard Morris                       | tt0062490 |
| 1746473667 | 1942 | 1942 | Land of the Open Range            | Land of the Open Range            | Killy, Edward                | Edward Killy                        | tt0033810 |
| 1746574761 | 1934 | 1934 | The Prescott Kid                  | The Prescott Kid                  | Selman, David                | David Selman                        | tt0028134 |
| 1746560029 | 1964 | 1964 | The Naked Kiss                    | The Naked Kiss                    | Fuller, Samuel               | Samuel Fuller                       | tt0058390 |
| 1746500582 | 1925 | 1925 | Love on the Rio Grande            | Love on the Rio Grande            | Craft, William J.            | William James Craft                 | tt0016046 |
| 1746567357 | 1932 | 1932 | The Strange Love of Molly Louvain | The Strange Love of Molly Louvain | Curtiz, Michael              | Michael Curtiz                      | tt0023525 |
| 1746582205 | 1930 | 1930 | Dumbbells in Ermine               | Dumbbells in Ermine               | Adolfi, John G.              | John G. Adolfi                      | tt0020848 |
| 1746435223 | 1943 | 1943 | Canyon City                       | Canyon City                       | Bennet, Spencer              | Spencer Gordon Bennet               | tt0035711 |
| 1746582971 | 1938 | 1938 | Sharpshooters                     | Sharpshooters                     | Tinling, James               | James Tinling                       | tt0030738 |

|            |      |      |                                      |                                      |                                |                   |           |
|------------|------|------|--------------------------------------|--------------------------------------|--------------------------------|-------------------|-----------|
| 1746514516 | 1916 | 1916 | The Wasted Years                     | The Wasted Years                     | Broadwell, Robert B.           | Robert Broadwell  | tt0159114 |
| 1769975280 | 1917 | 1917 | In Treason's Grasp                   | In Treason's Grasp                   |                                | Francis Ford      | tt0312806 |
| 1746582494 | 1939 | 1939 | Blackmail                            | Blackmail                            | Potter, H. C.                  | H.C. Potter       | tt0031102 |
| 1746582862 | 1935 | 1935 | Every Night at Eight                 | Every Night at Eight                 | Walsh, Raoul                   | Raoul Walsh       | tt0026325 |
| 1745358053 | 2010 | 2010 | You Again                            | You Again                            | Fickman, Andy                  | Andy Fickman      | tt1414382 |
| 1746508908 | 1925 | 1925 | Unrestrained Youth                   | Unrestrained Youth                   | Levering, Joseph               | Joseph Levering   | tt0175283 |
| 1746582684 | 1938 | 1938 | Cipher Bureau                        | Cipher Bureau                        | Lamont, Charles                | Charles Lamont    | tt0029994 |
| 1746570716 | 1934 | 1934 | Murder at the Vanities               | Murder at the Vanities               | Leisen, Mitchell               | Mitchell Leisen   | tt0025529 |
| 1746520763 | 1948 | 1948 | Jungle Jim                           | Jungle Jim                           | Berke, William                 | William Berke     | tt0040501 |
| 1746553904 | 1964 | 1964 | The Horror of Party Beach            | The Horror of Party Beach            | Tenney, Del                    | Del Tenney        | tt0058208 |
| 1745302765 | 2005 | 2005 | Going Shopping                       | Going Shopping                       | Jaglom, Henry                  | Henry Jaglom      | tt0295605 |
| 1746582712 | 1935 | 1935 | Rendezvous at Midnight               | Rendezvous at Midnight               | Cabanne, Christy               | Christy Cabanne   | tt0026923 |
| 1746503255 | 1917 | 1917 | The Man Without a Country            | The Man Without a Country            | Warde, Ernest C.               | Ernest C. Warde   | tt0008259 |
| 1746524994 | 1923 | 1923 | The Unknown Purple                   | The Unknown Purple                   | West, Roland                   | Roland West       | tt0014569 |
| 1746567250 | 1933 | 1933 | Private Jones                        | Private Jones                        | Mack, Russell                  | Russell Mack      | tt0024472 |
| 1746454024 | 1943 | 1943 | Buckskin Frontier                    | Buckskin Frontier                    | Selander, Lesley               | Lesley Selander   | tt0035700 |
| 1746509011 | 1925 | 1925 | The Splendid Road                    | The Splendid Road                    |                                | Frank Lloyd       | tt0016386 |
| 2007986195 | 2004 | 2004 | Bridget Jones: The Edge of Reason    | Bridget Jones: The Edge of Reason    | Kidron, Beeban                 | Beeban Kidron     | tt0317198 |
| 1746581234 | 1960 | 1960 | The Story of Ruth                    | The Story of Ruth                    | Koster, Henry                  | Henry Koster      | tt0054343 |
| 1746409294 | 1991 | 1991 | One Good Cop                         | One Good Cop                         | Gould, Heywood                 | Heywood Gould     | tt0102593 |
| 1746217055 | 1966 | 1966 | Arabesque                            | Arabesque                            | Donen, Stanley                 | Stanley Donen     | tt0060121 |
| 1746420936 | 1940 | 1940 | West of Carson City                  | West of Carson City                  | Taylor, Ray                    | Ray Taylor        | tt0033250 |
| 1746583303 | 1931 | 1931 | Leftover Ladies                      | Left Over Ladies                     | Kenton, Erle C.                | Erle C. Kenton    | tt0022066 |
| 1746524296 | 1915 | 1915 | The Curious Conduct of Judge Legarde | The Curious Conduct of Judge Legarde | Davis, Will                    | Will S. Davis     | tt0005167 |
| 1746437117 | 2000 | 2000 | Love and Basketball                  | Love & Basketball                    | Prince-Bythewood, Gina         | Gina Prince       | tt0199725 |
| 1746211082 | 1973 | 1973 | Dillinger                            | Dillinger                            | Milius, John                   | John Milius       | tt0069976 |
| 1746497665 | 1919 | 1919 | Red Hot Dollars                      | Red Hot Dollars                      | Storm, Jerome                  | Jerome Storm      | tt0010615 |
| 1746474104 | 1946 | 1946 | Terror by Night                      | Terror by Night                      | Neill, Roy William             | Roy William Neill | tt0039017 |
| 1746419367 | 1990 | 1989 | Blind Fury                           | Blind Fury                           | Noyce, Phillip                 | Phillip Noyce     | tt0096945 |
| 1746435886 | 2000 | 2000 | Center Stage                         | Center Stage                         | Hytner, Nicholas               | Nicholas Hytner   | tt0210616 |
| 1746530686 | 1949 | 1949 | Anna Lucasta                         | Anna Lucasta                         | Rapper, Irving                 | Irving Rapper     | tt0041125 |
| 1745309124 | 2005 | 2005 | Be Cool                              | Be Cool                              | Gray, F. Gary                  | F. Gary Gray      | tt0377471 |
| 1746501323 | 1915 | 1915 | The Woman Next Door                  | The Woman Next Door                  | Edwin, Walter                  | Walter Edwin      | tt0006302 |
| 1746508455 | 1949 | 1949 | The Crooked Way                      | The Crooked Way                      | Florey, Robert                 | Robert Florey     | tt0041269 |
| 1745342930 | 2003 | 2002 | Cabin Fever                          | Cabin Fever                          | Roth, Eli                      | Eli Roth          | tt0303816 |
| 1745359355 | 2008 | 2008 | War, Inc.                            | War, Inc.                            | Seftel, Joshua                 | Joshua Seftel     | tt0884224 |
| 1746574803 | 1933 | 1933 | Take a Chance                        | Take a Chance                        | Brice, Monte; Schwab, Laurence | Monte Brice       | tt0024640 |
| 1746486137 | 1919 | 1919 | Love, Honor and -Xxx ?               | Love, Honor and ?                    | Miller, Charles                | Charles Miller    | tt0191259 |
| 1746585203 | 1929 | 1929 | A Single Man                         | A Single Man                         | Beaumont, Harry                | Harry Beaumont    | tt0020409 |
| 1746566750 | 1933 | 1933 | Cradle Song                          | Cradle Song                          | Leisen, Mitchell               | Mitchell Leisen   | tt0023913 |
| 1746584697 | 1930 | 1930 | Abraham Lincoln                      | Abraham Lincoln                      | Griffith, D. W.                | D.W. Griffith     | tt0020620 |
| 1745359810 | 2001 | 2000 | The Independent                      | The Independent                      | Kessler, Stephen               | Stephen Kessler   | tt0160403 |
| 1746492555 | 1948 | 1948 | My Dear Secretary                    | My Dear Secretary                    | Martin, Charles                | Charles Martin    | tt0040626 |
| 1746574794 | 1936 | 1936 | Brides Are Like That                 | Brides Are Like That                 | McGann, William                | William C. McGann | tt0027396 |
| 1746567124 | 1932 | 1932 | War Correspondent                    | War Correspondent                    | Sloane, Paul                   | Paul Sloane       | tt0023670 |
| 1746473938 | 1948 | 1948 | So This Is New York                  | So This Is New York                  | Fleischer, Richard O.          | Richard Fleischer | tt0040810 |
| 1746514852 | 1910 | 1910 | Up a Tree                            | Up a Tree                            | Powell, Frank                  | Frank Powell      | tt0001438 |
| 1746234523 | 1967 | 1967 | Sweet Love, Bitter                   | Sweet Love, Bitter                   | Danska, Herbert                | Herbert Danska    | tt0062325 |
| 1746574045 | 1959 | 1959 | The Horse Soldiers                   | The Horse Soldiers                   | Ford, John                     | John Ford         | tt0052902 |
| 1745374329 | 2003 | 2002 | Poolhall Junkies                     | Poolhall Junkies                     | Callahan, Mars                 | Mars Callahan     | tt0273982 |
| 1746509031 | 1924 | 1924 | Ragged Robin                         | Ragged Robin                         | Mattison, Frank S.             | Frank S. Mattison | tt0015257 |
| 1746580349 | 1938 | 1938 | Of Human Hearts                      | Of Human Hearts                      | Brown, Clarence                | Clarence Brown    | tt0030517 |
| 1745395609 | 2010 | 2010 | Morning Glory                        | Morning Glory                        | Michell, Roger                 | Roger Michell     | tt1126618 |
| 1746580707 | 1935 | 1935 | Redheads on Parade                   | Redheads on Parade                   | McLeod, Norman                 | Norman Z. McLeod  | tt0026920 |
| 1746584252 | 1940 | 1940 | Stranger on the Third Floor          | Stranger on the Third Floor          | Ingster, Boris                 | Boris Ingster     | tt0033107 |
| 1746474531 | 1946 | 1946 | Anna and the King of Siam            | Anna and the King of Siam            | Cromwell, John                 | John Cromwell     | tt0038303 |
| 1746497614 | 1919 | 1919 | In Old Kentucky                      | In Old Kentucky                      | Neilan, Marshall               | Marshall Neilan   | tt0010291 |

|            |      |      |                               |                               |                                        |                     |           |
|------------|------|------|-------------------------------|-------------------------------|----------------------------------------|---------------------|-----------|
| 1746153058 | 1910 | 1910 | An Affair of Hearts           | An Affair of Hearts           | Griffith, D. W.                        | Frank Powell        | tt0001103 |
| 1746186231 | 1967 | 1967 | Caprice                       | Caprice                       | Tashlin, Frank                         | Frank Tashlin       | tt0061447 |
| 1746248011 | 1966 | 1966 | The Wild World of Batwoman    | The Wild World of Batwoman    | Warren, Jerry                          | Jerry Warren        | tt0061191 |
| 1746532636 | 1923 | 1923 | Bell Boy 13                   | Bell Boy 13                   | Seiter, William                        | William A. Seiter   | tt0013866 |
| 1746437002 | 1942 | 1942 | The Silver Bullet             | The Silver Bullet             | Lewis, Joseph                          | Joseph H. Lewis     | tt0035334 |
| 1746576848 | 1931 | 1931 | The Sheriff's Secret          | The Sheriff's Secret          | Hogan, James P.                        | James P. Hogan      | tt0022372 |
| 1746582480 | 1936 | 1936 | The Old Corral                | The Old Corral                | Kane, Joseph                           | Joseph Kane         | tt0028054 |
| 1746186017 | 1969 | 1969 | That Tender Touch             | That Tender Touch             | Vincent, Russel                        | Russel Vincent      | tt0153000 |
| 1746473727 | 1943 | 1943 | Top Man                       | Top Man                       | Lamont, Charles                        | Charles Lamont      | tt0036450 |
| 1746520173 | 1924 | 1924 | The Man Without a Heart       | The Man Without a Heart       | King, Burton                           | Burton L. King      | tt0015112 |
| 1745394013 | 2009 | 2008 | Walt & El Grupo               | Walt & El Grupo               | Thomas, Theodore                       | Theodore Thomas     | tt1223150 |
| 1746421578 | 1997 | 1997 | The Devil's Own               | The Devil's Own               | Pakula, Alan J.                        | Alan J. Pakula      | tt0118972 |
| 1746453627 | 1943 | 1943 | Larceny with Music            | Larceny with Music            | Lilley, Edward                         | Edward C. Lilley    | tt0036097 |
| 1746491774 | 1947 | 1947 | Bells of San Angelo           | Bells of San Angelo           | Witney, William                        | William Witney      | tt0039180 |
| 1746508505 | 1924 | 1924 | Another Scandal               | Another Scandal               | Griffith, Edward H.                    | Edward H. Griffith  | tt0014678 |
| 1746465107 | 1944 | 1944 | The Canterville Ghost         | The Canterville Ghost         | Dassin, Jules; McLeod, Norman Z.       | Jules Dassin        | tt0036696 |
| 1746497645 | 1920 | 1920 | Up in Mary's Attic            | Up in Mary's Attic            | Watson, William H.                     | William Watson      | tt0180276 |
| 1746585273 | 1928 | 1928 | There It Is                   | There It Is                   | Muller, H. L.                          | Harold L. Muller    | tt0019466 |
| 1745309284 | 2005 | 2005 | Dark Water                    | Dark Water                    | Salles, Walter                         | Walter Salles       | tt0382628 |
| 1746508760 | 1924 | 1924 | Ramshackle House              | Ramshackle House              | Weight, Harmon                         | F. Harmon Weight    | tt0015259 |
| 1745395966 | 2010 | 2010 | Going the Distance            | Going the Distance            | Burstein, Nanette                      | Nanette Burstein    | tt1322312 |
| 1746584129 | 1938 | 1938 | Convicts at Large             | Convicts at Large             | Beal, Scott; Friedman, David A.        | Scott R. Beal       | tt0165696 |
| 1746513459 | 1915 | 1915 | In the Palace of the King     | In the Palace of the King     | Wright, Fred                           | Fred E. Wright      | tt0005541 |
| 1746438289 | 1943 | 1943 | Raiders of Sunset Pass        | Raiders of Sunset Pass        | English, John                          | John English        | tt0036291 |
| 1746586159 | 1940 | 1940 | Rhythm on the River           | Rhythm on the River           | Schertzing, Victor                     | Victor Schertzing   | tt0032986 |
| 1746502336 | 1916 | 1916 | The Phantom                   | The Phantom                   | Giblyn, Charles                        | Charles Giblyn      | tt0007180 |
| 1746580435 | 1935 | 1935 | Never Too Late                | Never Too Late                | Shamray, Franklin                      | Bernard B. Ray      | tt0026771 |
| 1769971077 | 1969 | 1969 | Mnasidika                     | Mnasidika                     |                                        | Michael Findlay     | tt0064677 |
| 1746566361 | 1958 | 1958 | The Hunters                   | The Hunters                   | Powell, Dick                           | Dick Powell         | tt0051750 |
| 1746508020 | 1925 | 1926 | Trapped                       | Trapped                       |                                        | William A. Crinley  | tt0159800 |
| 1746580351 | 1938 | 1938 | California Frontier           | California Frontier           | Clifton, Elmer                         | Elmer Clifton       | tt0029959 |
| 1746580812 | 1936 | 1936 | Neighborhood House            | Neighborhood House            | Parrott, Charles; Law, Harold; Hale, / | Charley Chase       | tt0028024 |
| 1746514772 | 1913 | 1913 | The Tonopah Stampede for Gold | The Tonopah Stampede for Gold | Pryor, Charles A.                      | Charles A. Pryor    | tt0003464 |
| 1746569633 | 1954 | 1954 | Drums of Tahiti               | Drums of Tahiti               | Castle, William                        | William Castle      | tt0046938 |
| 1746582223 | 1951 | 1951 | Queen for a Day               | Queen for a Day               | Lubin, Arthur                          | Arthur Lubin        | tt0043947 |
| 1746436270 | 1990 | 1990 | Texasville                    | Texasville                    | Bogdanovich, Peter                     | Peter Bogdanovich   | tt0103069 |
| 1746454674 | 1942 | 1942 | The Living Ghost              | The Living Ghost              | Beaudine, William                      | William Beaudine    | tt0034985 |
| 1746464892 | 1942 | 1942 | Flying with Music             | Flying with Music             | Archainbaud, George                    | George Archainbaud  | tt0034743 |
| 1746574520 | 1953 | 1952 | Limelight                     | Limelight                     | Chaplin, Charles                       | Charles Chaplin     | tt0044837 |
| 1746393176 | 1988 | 1988 | Short Circuit 2               | Short Circuit 2               | Johnson, Kenneth                       | Kenneth Johnson     | tt0096101 |
| 1746569725 | 1953 | 1953 | Beneath the 12-Mile Reef      | Beneath the 12 Mile Reef      | Webb, Robert D.                        | Robert D. Webb      | tt0045551 |
| 1746250536 | 1977 | 1977 | American Tickler              | American Tickler              | Vincent, Chuck                         | Chuck Vincent       | tt0074135 |
| 1746504411 | 1920 | 1920 | Woman's Man                   | A Woman's Man                 | Gordon, Warren                         | Warren Gordon       | tt0202688 |
| 1746500939 | 1915 | 1915 | The Mystery of Room 13        | The Mystery of Room 13        | Ridgwell, George                       | George Ridgwell     | tt0005795 |
| 1746393434 | 1983 | 1983 | My Tutor                      | My Tutor                      | Bowers, George                         | George Bowers       | tt0085980 |
| 1746520865 | 1949 | 1949 | Easy Living                   | Easy Living                   | Tourneur, Jacques                      | Jacques Tourneur    | tt0041328 |
| 1746583712 | 1928 | 1928 | Breed of the Sunsets          | Breed of the Sunsets          | Fox, Wallace W.                        | Wallace Fox         | tt0018719 |
| 1745359151 | 2009 | 2009 | Bandslam                      | Bandslam                      | Graff, Todd                            | Todd Graff          | tt0976222 |
| 1746584866 | 1930 | 1930 | The Life of the Party         | The Life of the Party         | Del Ruth, Roy                          | Roy Del Ruth        | tt0021069 |
| 1746282242 | 1980 | 1980 | Cruising                      | Cruising                      | Friedkin, William                      | William Friedkin    | tt0080569 |
| 1746533225 | 1915 | 1915 | Bred in the Bone              | Bred in the Bone              | Powell, Paul                           | Paul Powell         | tt0004999 |
| 1746513182 | 1915 | 1915 | The White Scar                | The White Scar                | Davis, Ulysses                         | Hobart Bosworth     | tt0006280 |
| 1746503818 | 1922 | 1922 | Wolf Pack                     | Wolf Pack                     | Craft, William J.                      | William James Craft | tt0180312 |
| 1746453770 | 1941 | 1941 | Glamour Boy                   | Glamour Boy                   | Murphy, Ralph; Tetzlaff, Ted           | Ralph Murphy        | tt0033666 |
| 1746218845 | 1972 | 1972 | Deliverance                   | Deliverance                   | Boorman, John                          | John Boorman        | tt0068473 |
| 1746516528 | 1921 | 1921 | Man-Woman-Marriage            | Man Woman Marriage            | Holubar, Allen                         | Allen Holubar       | tt0012445 |
| 1746408433 | 1984 | 1984 | Night of the Comet            | Night of the Comet            | Eberhardt, Thom                        | Thom Eberhardt      | tt0087799 |

|            |      |      |                                    |                                    |                                |                     |           |
|------------|------|------|------------------------------------|------------------------------------|--------------------------------|---------------------|-----------|
| 1746583926 | 1931 | 1931 | Near the Trail's End               | Near the Trail's End               | Fox, Wallace                   | Wallace Fox         | tt0022192 |
| 1745302604 | 2006 | 2005 | Trust the Man                      | Trust the Man                      | Freundlich, Bart               | Bart Freundlich     | tt0427968 |
| 1746514110 | 1914 | 1914 | The Unwelcome Mrs. Hatch           | The Unwelcome Mrs. Hatch           |                                | Allan Dwan          | tt0004754 |
| 1745342880 | 2002 | 2002 | Slackers                           | Slackers                           | Nicks, Dewey                   | Dewey Nicks         | tt0240900 |
| 1746569778 | 1954 | 1954 | Suddenly                           | Suddenly                           | Allen, Lewis                   | Lewis Allen         | tt0047542 |
| 1746567966 | 1934 | 1934 | Born to Be Bad                     | Born to Be Bad                     | Sherman, Lowell                | Lowell Sherman      | tt0024906 |
| 1746513650 | 1923 | 1923 | The Love Trap                      | The Love Trap                      | Ince, John                     | John Ince           | tt0014221 |
| 1769971165 | 1969 | 1969 | Felicia                            | Felicia                            | Shiffen, Arlo                  | Don Walters         | tt0218221 |
| 1746524888 | 1928 | 1928 | The Night Flyer                    | The Night Flyer                    | Lang, Walter                   | Walter Lang         | tt0019211 |
| 1746578051 | 1937 | 1937 | Smoke Tree Range                   | Smoke Tree Range                   | Selander, Lesley               | Lesley Selander     | tt0029582 |
| 1746581028 | 1951 | 1951 | Call Me Mister                     | Call Me Mister                     | Bacon, Lloyd                   | Lloyd Bacon         | tt0043370 |
| 1745358069 | 2008 | 2008 | Wanted                             | Wanted                             | Bekmambetov, Timur             | Timur Bekmambetov   | tt0493464 |
| 1746560013 | 1965 | 1965 | Convict Stage                      | Convict Stage                      | Selander, Lesley               | Lesley Selander     | tt0122027 |
| 1746530691 | 1949 | 1949 | Henry, the Rainmaker               | Henry, the Rainmaker               | Yarbrough, Jean                | Jean Yarbrough      | tt0041457 |
| 1746578859 | 1963 | 1963 | It Happened at the World's Fair    | It Happened at the World's Fair    | Taugog, Norman                 | Norman Taugog       | tt0057191 |
| 1746514949 | 1916 | 1916 | A Prince in a Pawnshop             | A Prince in a Pawnshop             | Scardon, Paul                  | Paul Scardon        | tt0007219 |
| 1746509526 | 1948 | 1948 | Mark of the Lash                   | Mark of the Lash                   | Taylor, Ray                    | Ray Taylor          | tt0040571 |
| 1746566143 | 1958 | 1958 | Damn Yankees                       | Damn Yankees                       | Abbott, George; Donen, Stanley | George Abbott       | tt0051516 |
| 1769973126 | 1924 | 1924 | Andy's Stump Speech                | Andy's Stump Speech                | Taugog, Norman                 | Norman Taugog       | tt0321231 |
| 1746455365 | 1994 | 1994 | Naked Gun 33 1/3: The Final Insult | Naked Gun 33 1/3: The Final Insult | Segal, Peter                   | Peter Segal         | tt0110622 |
| 1746513841 | 1923 | 1923 | Ridin' Thru                        | Ridin' Thru                        |                                | Dick Hatton         | tt0436719 |
| 1746234962 | 1967 | 1967 | I Was a Man                        | I Was a Man                        | Mahon, Barry                   | Barry Mahon         | tt0190473 |
| 1746524698 | 1915 | 1915 | The Frame-Up                       | The Frame Up                       | Turner, Otis                   | Otis Turner         | tt0005356 |
| 1745282864 | 2006 | 2006 | RV                                 | RV                                 | Sonnenfeld, Barry              | Barry Sonnenfeld    | tt0449089 |
| 1746502088 | 1917 | 1917 | Conscience                         | Conscience                         | Bracken, Bertram               | Bertram Bracken     | tt0005130 |
| 1746570329 | 1933 | 1933 | Hell Below                         | Hell Below                         | Conway, Jack                   | Jack Conway         | tt0024100 |
| 1746217288 | 1966 | 1966 | An Eye for an Eye                  | An Eye for an Eye                  | Moore, Michael                 | Michael D. Moore    | tt0060386 |
| 1746465097 | 1945 | 1945 | The Crime Doctor's Warning         | The Crime Doctor's Warning         | Castle, William                | William Castle      | tt0037621 |
| 1746573167 | 1910 | 1910 | For a Woman's Honor                | For a Woman's Honor                |                                | Sidney Olcott       | tt1912395 |
| 1746210494 | 1973 | 1973 | Little Cigars                      | Little Cigars                      | Christenberry, Chris           | Chris Christenberry | tt0070323 |
| 1745309404 | 2006 | 2006 | The Second Chance                  | The Second Chance                  | Taylor, Steve                  | Steve Taylor        | tt0429068 |
| 1746583632 | 1929 | 1929 | Western Methods                    | Western Methods                    |                                |                     | tt0177386 |
| 1746423309 | 1995 | 1995 | Father of the Bride Part II        | Father of the Bride Part II        | Shyer, Charles                 | Charles Shyer       | tt0113041 |
| 1746584771 | 1928 | 1928 | The Cowboy Cavalier                | The Cowboy Cavalier                | Thorpe, Richard                | Richard Thorpe      | tt0018798 |
| 1746508432 | 1950 | 1950 | Captain China                      | Captain China                      | Foster, Lewis R.               | Lewis R. Foster     | tt0041227 |
| 1746570981 | 1934 | 1934 | The Man from Utah                  | The Man from Utah                  | Bradbury, Robert               | Robert N. Bradbury  | tt0025455 |
| 1746580303 | 1937 | 1937 | Left-Handed Law                    | Left Handed Law                    | Selander, Lesley               | Lesley Selander     | tt0029129 |
| 1745309471 | 2007 | 2007 | Balls of Fury                      | Balls of Fury                      | Garant, Robert Ben             | Robert Ben Garant   | tt0424823 |
| 1746555280 | 1956 | 1956 | Manfish                            | Manfish                            | Wilder, W. Lee                 | W. Lee Wilder       | tt0049477 |
| 1746464911 | 1946 | 1946 | In Fast Company                    | In Fast Company                    | Lord, Del                      | Del Lord            | tt0038636 |
| 1746570999 | 1934 | 1934 | Evelyn Prentice                    | Evelyn Prentice                    | Howard, William K.             | William K. Howard   | tt0025091 |
| 1746501384 | 1916 | 1916 | Atta Boy's Last Race               | Atta Boy's Last Race               | Siegmann, George               | George Siegmann     | tt0006381 |
| 1746523969 | 1927 | 1927 | Hula                               | Hula                               | Fleming, Victor                | Victor Fleming      | tt0018016 |
| 1746487372 | 1918 | 1918 | Till I Come Back to You            | Till I Come Back to You            | DeMille, Cecil B.              | Cecil B. DeMille    | tt0009702 |
| 1745302302 | 2007 | 2007 | Into the Wild                      | Into the Wild                      | Penn, Sean                     | Sean Penn           | tt0758758 |
| 1746556001 | 1954 | 1954 | Taza, Son of Cochise               | Taza, Son of Cochise               | Sirk, Douglas                  | Douglas Sirk        | tt0047562 |
| 1769970839 | 1915 | 1915 | Beyond All Is Love                 | Beyond All Is Love                 | Greene, Clay M.                | Clay M. Greene      | tt0416544 |
| 1746475977 | 1945 | 1945 | Escape in the Desert               | Escape in the Desert               | Blatt, Edward A.               | Edward A. Blatt     | tt0037677 |
| 1746583397 | 1930 | 1930 | Lightnin'                          | Lightnin'                          | King, Henry                    | Henry King          | tt0021071 |
| 1746421712 | 1993 | 1993 | A Perfect World                    | A Perfect World                    | Eastwood, Clint                | Clint Eastwood      | tt0107808 |
| 1746234787 | 1974 | 1974 | The Swinging Cheerleaders          | The Swinging Cheerleaders          | Hill, Jack                     | Jack Hill           | tt0072236 |
| 1746583888 | 1931 | 1931 | Hell Bent for Frisco               | Hell Bent for Frisco               | Paton, Stuart                  | Stuart Paton        | tt0021948 |
| 1746261214 | 1979 | 1979 | The Wanderers                      | The Wanderers                      | Kaufman, Philip                | Philip Kaufman      | tt0080117 |
| 1746584280 | 1935 | 1935 | The Case of the Lucky Legs         | The Case of the Lucky Legs         | Mayo, Archie L.                | Archie Mayo         | tt0026185 |
| 1746394748 | 1985 | 1985 | American Ninja                     | American Ninja                     | Firstenberg, Sam               | Sam Firstenberg     | tt0088708 |
| 1746184516 | 1910 | 1910 | Chief Blackfoot's Vindication      | Chief Blackfoot's Vindication      |                                | Kenean Buel         | tt1914227 |
| 1746508371 | 1949 | 1949 | The Threat                         | The Threat                         | Feist, Felix                   | Felix E. Feist      | tt0041963 |

|            |      |      |                                 |                                 |                          |                     |           |
|------------|------|------|---------------------------------|---------------------------------|--------------------------|---------------------|-----------|
| 1746577516 | 1938 | 1938 | The Young in Heart              | The Young in Heart              | Wallace, Richard         | Richard Wallace     | tt0031002 |
| 1746524506 | 1916 | 1916 | My Partner                      | My Partner                      | Sanger, Mr.              | Mr. Sanger          | tt0007106 |
| 1746583147 | 1935 | 1935 | The Drunkard                    | The Drunkard                    | Herman, Albert           | Albert Herman       | tt0132929 |
| 1746394766 | 1991 | 1991 | What About Bob?                 | What About Bob?                 | Oz, Frank                | Frank Oz            | tt0103241 |
| 1746464923 | 1941 | 1941 | Repent at Leisure               | Repent at Leisure               | Woodruff, Frank          | Frank Woodruff      | tt0034094 |
| 1746199538 | 1969 | 1969 | Putney Swope                    | Putney Swope                    |                          | Robert Downey Sr.   | tt0064855 |
| 1746501150 | 1914 | 1914 | Tess of the Storm Country       | Tess of the Storm Country       |                          | Edwin S. Porter     | tt0004681 |
| 1746507583 | 1926 | 1926 | Skinner's Dress Suit            | Skinner's Dress Suit            | Seiter, William A.       | William A. Seiter   | tt0017401 |
| 1745372376 | 2008 | 2008 | Zombie Strippers                | Zombie Strippers                | Lee, Jay                 | Jay Lee             | tt0960890 |
| 1746507872 | 1925 | 1925 | Hearts and Spurs                | Hearts and Spurs                | Van Dyke, William S.     | W.S. Van Dyke       | tt0015903 |
| 1746475505 | 1943 | 1943 | Swing Shift Maisie              | Swing Shift Maisie              | McLeod, Norman Z.        | Norman Z. McLeod    | tt0036407 |
| 1746438616 | 1941 | 1941 | Sing for Your Supper            | Sing for Your Supper            | Barton, Charles          | Charles Barton      | tt0035339 |
| 1746474405 | 1944 | 1944 | San Fernando Valley             | San Fernando Valley             | English, John            | John English        | tt0037245 |
| 1746514486 | 1927 | 1927 | Cheating Cheaters               | Cheating Cheaters               | Laemmle, Edward          | Edward Laemmle      | tt0017746 |
| 1746502679 | 1916 | 1916 | What Love Can Do                | What Love Can Do                | Hunt, Jay                | Jay Hunt            | tt0007551 |
| 1746500037 | 1946 | 1946 | Santa Fe Uprising               | Santa Fe Uprising               | Springsteen, R. G.       | R.G. Springsteen    | tt0038907 |
| 1746208531 | 1969 | 1969 | The April Fools                 | The April Fools                 | Rosenberg, Stuart        | Stuart Rosenberg    | tt0064036 |
| 1746507811 | 1926 | 1926 | The Cowboy and the Countess     | The Cowboy and the Countess     | Neill, R. William        | Roy William Neill   | tt0016746 |
| 1746582192 | 1951 | 1950 | The Sound of Fury               | The Sound of Fury               | Endfield, Cyril          | Cy Endfield         | tt0043075 |
| 1746197908 | 1968 | 1968 | A Lovely Way To Die             | A Lovely Way To Die             | Rich, David Lowell       | David Lowell Rich   | tt0063246 |
| 1746514580 | 1917 | 1917 | Infidelity                      | Infidelity                      | Miller, Ashley           | Ashley Miller       | tt0176852 |
| 1746545349 | 1940 | 1940 | Phantom Submarine               | The Phantom Submarine           | Barton, Charles          | Charles Barton      | tt0034021 |
| 1746504199 | 1920 | 1920 | Something Different             | Something Different             | Neill, R. William        | Roy William Neill   | tt0012712 |
| 1746410208 | 1984 | 1984 | Best Defense                    | Best Defense                    | Huyck, Willard           | Willard Huyck       | tt0086955 |
| 1746584004 | 1939 | 1939 | Yes, My Darling Daughter        | Yes, My Darling Daughter        | Keighley, William        | William Keighley    | tt0032149 |
| 1746582991 | 1935 | 1935 | Powdersmoke Range               | Powdersmoke Range               | Fox, Wallace             | Wallace Fox         | tt0026886 |
| 1746219004 | 1974 | 1974 | Like Father, Like Son           | Like Father, Like Son           | Mitchell, Duke           | Duke Mitchell       | tt0077525 |
| 1746492120 | 1948 | 1948 | Tarzan and the Mermaids         | Tarzan and the Mermaids         | Florey, Robert           | Robert Florey       | tt0040862 |
| 1746492563 | 1946 | 1946 | The Falcon's Adventure          | The Falcon's Adventure          | Berke, William           | William Berke       | tt0038518 |
| 1746578698 | 1950 | 1950 | Tea for Two                     | Tea for Two                     | Butler, David            | David Butler        | tt0043030 |
| 1746578765 | 1959 | 1959 | The Miracle of the Hills        | The Miracle of the Hills        | Landres, Paul            | Paul Landres        | tt0053068 |
| 1746453622 | 1943 | 1943 | Raiders of San Joaquin          | Raiders of San Joaquin          | Collins, Lewis D.        | Lewis D. Collins    | tt0036290 |
| 1746578726 | 1961 | 1961 | All in a Night's Work           | All in a Night's Work           | Anthony, Joseph          | Joseph Anthony      | tt0054615 |
| 1746530683 | 1950 | 1950 | Holiday Rhythm                  | Holiday Rhythm                  | Scholl, Jack             | Jack Scholl         | tt0042568 |
| 1746569613 | 1953 | 1953 | San Antone                      | San Antone                      | Kane, Joseph             | Joseph Kane         | tt0046271 |
| 1746579057 | 1960 | 1960 | The Last Voyage                 | The Last Voyage                 | Stone, Andrew L.         | Andrew L. Stone     | tt0054016 |
| 1746475263 | 1948 | 1948 | Feudin', Fussin' and A-Fightin' | Feudin', Fussin' and A Fightin' | Sherman, George          | George Sherman      | tt0040349 |
| 1746577568 | 1933 | 1933 | Convention City                 | Convention City                 | Mayo, Archie             | Archie Mayo         | tt0023906 |
| 1746582431 | 1939 | 1939 | Harlem Rides the Range          | Harlem Rides the Range          | Kahn, Richard C.         | Richard C. Kahn     | tt0031406 |
| 1746580364 | 1938 | 1938 | Double Danger                   | Double Danger                   | Landers, Lew             | Lew Landers         | tt0030074 |
| 1746524505 | 1923 | 1923 | Merry-Go-Round                  | Merry Go Round                  | Julian, Rupert           | Rupert Julian       | tt0013386 |
| 1746572975 | 1931 | 1931 | The Devil Plays                 | The Devil Plays                 | Thorpe, Richard          | Richard Thorpe      | tt0021796 |
| 1769973314 | 1970 | 1970 | I Am Curious--Tahiti            | I Am Curious Tahiti             | Tobalina, Carlos         | Carlos Tobalina     | tt0189596 |
| 1746421323 | 1994 | 1994 | Little Giants                   | Little Giants                   | Dunham, Duwayne          | Duwayne Dunham      | tt0110364 |
| 1746233305 | 1968 | 1968 | Revolution                      | Revolution                      | O'Connell, Jack          | Jack O'Connell      | tt0063503 |
| 1769970650 | 1966 | 1966 | Caught in the Act!              | Caught in the Act!              | Nehemiah, J.             | Jerald Intrator     | tt0212850 |
| 1746500002 | 1945 | 1945 | San Antonio                     | San Antonio                     | Butler, David            | David Butler        | tt0038048 |
| 1746576930 | 1961 | 1961 | Frontier Uprising               | Frontier Uprising               | Cahn, Edward L.          | Edward L. Cahn      | tt0054899 |
| 1746248498 | 1967 | 1967 | Thunder Alley                   | Thunder Alley                   | Rush, Richard            | Richard Rush        | tt0062365 |
| 1746465256 | 1947 | 1947 | Return of the Lash              | Return of the Lash              | Taylor, Ray              | Ray Taylor          | tt0039764 |
| 1746508266 | 1927 | 1927 | South Sea Love                  | South Sea Love                  | Ince, Ralph              | Ralph Ince          | tt0018432 |
| 1746566775 | 1952 | 1952 | Plymouth Adventure              | Plymouth Adventure              | Brown, Clarence          | Clarence Brown      | tt0045039 |
| 1746578478 | 1951 | 1950 | Appointment with Danger         | Appointment with Danger         | Allen, Lewis             | Lewis Allen         | tt0043292 |
| 1746561422 | 1932 | 1932 | Downstairs                      | Downstairs                      | Bell, Monta              | Monta Bell          | tt0022834 |
| 1746550071 | 1954 | 1954 | Salt of the Earth               | Salt of the Earth               | Biberman, Herbert J.     | Herbert J. Biberman | tt0047443 |
| 1746525020 | 1920 | 1920 | The Notorious Mrs. Sands        | The Notorious Mrs. Sands        | Cabanne, William Christy | Christy Cabanne     | tt0011519 |
| 1746581193 | 1910 | 1910 | In the Wilderness               | In the Wilderness               |                          |                     | tt1056076 |

|                   |             |             |                                          |                                          |                                    |                       |                  |
|-------------------|-------------|-------------|------------------------------------------|------------------------------------------|------------------------------------|-----------------------|------------------|
| 1746501629        | 1915        | 1915        | A Woman's Past                           | A Woman's Past                           | Powell, Frank                      | Frank Powell          | tt0006307        |
| 1745340798        | 2001        | 2000        | Punks                                    | Punks                                    | Polk, Patrik-Ian                   | Patrik                | tt0160710        |
| 1746500579        | 1949        | 1949        | The Lady Gambles                         | The Lady Gambles                         | Gordon, Michael                    | Michael Gordon        | tt0041572        |
| 1746585012        | 1940        | 1940        | Five Little Peppers in Trouble           | Five Little Peppers in Trouble           | Barton, Charles                    | Charles Barton        | tt0032473        |
| 1746439433        | 1998        | 1998        | My Giant                                 | My Giant                                 | Lehmann, Michael                   | Michael Lehmann       | tt0120765        |
| 1746421330        | 1992        | 1992        | The Gun in Betty Lou's Handbag           | The Gun in Betty Lou's Handbag           | Moyle, Allan                       | Allan Moyle           | tt0104376        |
| 1746487575        | 1919        | 1919        | The Indestructible Wife                  | The Indestructible Wife                  | Maigne, Charles                    | Charles Maigne        | tt0010296        |
| 1745342624        | 2002        | 2002        | Stealing Harvard                         | Stealing Harvard                         | McCulloch, Bruce                   | Bruce McCulloch       | tt0265808        |
| 1746578010        | 1937        | 1937        | Sudden Bill Dorn                         | Sudden Bill Dorn                         | Taylor, Ray                        | Ray Taylor            | tt0030809        |
| 1746520265        | 1925        | 1925        | Kentucky Pride                           | Kentucky Pride                           | Ford, John                         | John Ford             | tt0015973        |
| 1746421276        | 1993        | 1993        | Surf Ninjas                              | Surf Ninjas                              | Israel, Neal                       | Neal Israel           | tt0108258        |
| 1746566062        | 1957        | 1957        | The Phantom Stagecoach                   | The Phantom Stagecoach                   | Nazarro, Ray                       | Ray Nazarro           | tt0050840        |
| 1746408839        | 1987        | 1987        | Dolls                                    | Dolls                                    | Gordon, Stuart                     | Stuart Gordon         | tt0092906        |
| 1746501222        | 1923        | 1923        | Men in the Raw                           | Men in the Raw                           | Marshall, George E.                | George Marshall       | tt0014268        |
| 1746208845        | 1968        | 1968        | The Other Side of Bonnie and Clyde       | The Other Side of Bonnie and Clyde       | Buchanan, Larry                    | Larry Buchanan        | tt0063399        |
| 1746532478        | 1923        | 1923        | Adam and Eva                             | Adam and Eva                             | Vignola, Robert                    | Robert G. Vignola     | tt0012879        |
| 1746514615        | 1910        | 1910        | The Twisted Trail                        | The Twisted Trail                        | Griffith, D. W.                    | D. W. Griffith        | tt0001427        |
| 1746501012        | 1914        | 1914        | The Education of Mr. Pipp                | The Education of Mr. Pipp                |                                    | William F. Haddock    | tt0003875        |
| 1746453650        | 1941        | 1940        | Little Men                               | Little Men                               | McLeod, Norman Z.                  | Norman Z. McLeod      | tt0032717        |
| 1746525187        | 1921        | 1921        | Anne of Little Smoky                     | Anne of Little Smoky                     | Connor, Edward                     | Edward Connor         | tt0011926        |
| 1746581001        | 1959        | 1959        | Day of the Outlaw                        | Day of the Outlaw                        | DeToth, Andre                      | André De Toth         | tt0052724        |
| 1746503587        | 1920        | 1920        | The Invisible Divorce                    | The Invisible Divorce                    | Mills, Thomas R.; Deverich, Nat C. | Nat G. Deverich       | tt0011334        |
| 1746585340        | 1930        | 1930        | The Office Wife                          | The Office Wife                          | Bacon, Lloyd                       | Lloyd Bacon           | tt0021197        |
| 1746583612        | 1931        | 1931        | Anybody's Blonde                         | Anybody's Blonde                         | Strayer, Frank                     | Frank R. Strayer      | tt0021613        |
| 1746503944        | 1919        | 1918        | The Nature Girl                          | The Nature Girl                          | Lund, O. A. C.                     | O.A.C. Lund           | tt0009421        |
| 1746259879        | 1978        | 1978        | Interiors                                | Interiors                                | Allen, Woody                       | Woody Allen           | tt0077742        |
| 1745374008        | 2010        | 2009        | Chain Letter                             | Chain Letter                             | Taylor , Deon                      | Deon Taylor           | tt1148200        |
| 1746508079        | 1923        | 1923        | His Last Race                            | His Last Race                            | Eason, Reeves; Mitchell, Howard    | B. Reeves Eason       | tt0014135        |
| 1746574615        | 1933        | 1933        | Only Yesterday                           | Only Yesterday                           | Stahl, John M.                     | John M. Stahl         | tt0024418        |
| 1746509245        | 1925        | 1925        | Too Many Kisses                          | Too Many Kisses                          | Sloane, Paul                       | Paul Sloane           | tt0016439        |
| 1746582704        | 1935        | 1935        | Annapolis Farewell                       | Annapolis Farewell                       | Hall, Alexander                    | Alexander Hall        | tt0026072        |
| 1746435587        | 1941        | 1941        | The Cowboy and the Blonde                | The Cowboy and the Blonde                | McCarey, Ray                       | Ray McCarey           | tt0033495        |
| 1746524526        | 1915        | 1915        | Money                                    | Money                                    | Keane, James                       | James Keane           | tt0005763        |
| 1746502568        | 1916        | 1916        | The Woman Who Dared                      | The Woman Who Dared                      | Middleton, George E.               | George E. Middleton   | tt0159135        |
| 1746585205        | 1929        | 1929        | The Vagabond Cub                         | The Vagabond Cub                         | King, Louis                        | Louis King            | tt0348301        |
| 1746520381        | 1949        | 1949        | The Big Steal                            | The Big Steal                            | Siegel, Don                        | Don Siegel            | tt0041178        |
| 1746582077        | 1930        | 1930        | They Learned About Women                 | They Learned About Women                 | Conway, Jack; Wood, Sam            | Jack Conway           | tt0021464        |
| 1746565913        | 1956        | 1956        | Thunder over Arizona                     | Thunder Over Arizona                     | Kane, Joe                          | Joseph Kane           | tt0049851        |
| 1746502338        | 1917        | 1917        | The Debt                                 | The Debt                                 | Powell, Frank                      | Frank Powell          | tt0007844        |
| 1746491745        | 1948        | 1948        | The Gay Ranchero                         | The Gay Ranchero                         | Witney, William                    | William Witney        | tt0040385        |
| 1746575045        | 1937        | 1937        | Green Light                              | Green Light                              | Borzage, Frank                     | Frank Borzage         | tt0028958        |
| 1746495703        | 1920        | 1920        | The Amazing Woman                        | The Amazing Woman                        | Adolfi, John G.                    | John G. Adolfi        | tt0184203        |
| 1745358075        | 2010        | 2010        | Cats & Dogs: The Revenge of Kitty Galore | Cats & Dogs: The Revenge of Kitty Galore | Peyton, Brad                       | Brad Peyton           | tt1287468        |
| 1746454468        | 1942        | 1942        | Mrs. Wiggs of the Cabbage Patch          | Mrs. Wiggs of the Cabbage Patch          | Murphy, Ralph                      | Ralph Murphy          | tt0035094        |
| 1746520740        | 1925        | 1925        | The Shadow on the Wall                   | The Shadow on the Wall                   | Eason, Reeves                      | B. Reeves Eason       | tt0016337        |
| <b>1746504561</b> | <b>1921</b> | <b>1921</b> | <b>Crossing Trails</b>                   | <b>Crossing Trails</b>                   | <b>Smith, Cliff</b>                | <b>Clifford Smith</b> | <b>tt0012080</b> |
| 1746581287        | 1910        | 1910        | Liz's Career                             | Liz's Career                             |                                    |                       | tt1480814        |
| 1746435694        | 1942        | 1942        | The Bashful Bachelor                     | The Bashful Bachelor                     | St. Clair, Malcolm                 | Malcolm St. Clair     | tt0033379        |
| 1746422594        | 1999        | 1999        | Office Space                             | Office Space                             | Judge, Mike                        | Mike Judge            | tt0151804        |
| 1746574982        | 1936        | 1936        | Poor Little Rich Girl                    | Poor Little Rich Girl                    | Cummings, Irving                   | Irving Cummings       | tt0028118        |
| 1746507721        | 1927        | 1926        | Savage Passions                          | Savage Passions                          | Allen, Fred S.                     | Fred Allen            | tt0018360        |
| 1746500643        | 1924        | 1924        | Alimony                                  | Alimony                                  | Horne, James W.                    | James W. Horne        | tt0014666        |
| 1746525068        | 1921        | 1921        | The Kingdom of Human Hearts              | The Kingdom of Human Hearts              | Cosper, Wilbert Leroy              | Wilbert Leroy Cosper  | tt0330526        |
| 1746582465        | 1936        | 1936        | King of Hockey                           | King of Hockey                           | Smith, Noel                        | Noel M. Smith         | tt0027848        |
| 1746562105        | 1954        | 1954        | Day of Triumph                           | Day of Triumph                           | Pichel, Irving; Coyle, John T.     | John T. Coyle         | tt0046895        |
| 1745342914        | 2002        | 2002        | Jane White Is Sick & Twisted             | Jane White Is Sick & Twisted             | Latt, David Michael                | David Michael Latt    | tt0271018        |
| 1746570754        | 1934        | 1935        | Home on the Range                        | Home on the Range                        | Jacobson, Arthur                   | Arthur Jacobson       | tt0026484        |

|            |      |      |                                       |                                       |                                  |                      |           |
|------------|------|------|---------------------------------------|---------------------------------------|----------------------------------|----------------------|-----------|
| 1746454680 | 1941 | 1940 | Life with Henry                       | Life with Henry                       | Reed, Jay Theodore               | Theodore Reed        | tt0033834 |
| 1746524494 | 1927 | 1927 | Born To Battle                        | Born to Battle                        | Neitz, Alvin J.                  | Alan James           | tt0355282 |
| 1746578675 | 1961 | 1961 | Gun Street                            | Gun Street                            | Cahn, Edward L.                  | Edward L. Cahn       | tt0056043 |
| 1746582562 | 1936 | 1936 | The President's Mystery               | The President's Mystery               | Rosen, Phil                      | Phil Rosen           | tt0028135 |
| 1746409346 | 1985 | 1985 | A Chorus Line                         | A Chorus Line                         | Attenborough, Richard            | Richard Attenborough | tt0088915 |
| 1746581742 | 1928 | 1928 | Our Dancing Daughters                 | Our Dancing Daughters                 | Beaumont, Harry                  | Harry Beaumont       | tt0019237 |
| 1746434002 | 1996 | 1996 | Two If by Sea                         | Two If by Sea                         | Bennett, Bill                    | Bill Bennett         | tt0118002 |
| 1746185144 | 1965 | 1965 | Sylvia's Girls                        | Sylvia's Girls                        | Dempsey, Al                      | William Kerwin       | tt0259024 |
| 1746199974 | 1969 | 1969 | The Wonderful Land of Oz              | The Wonderful Land of Oz              | Mahon, Barry                     | Barry Mahon          | tt0065223 |
| 1746500666 | 1925 | 1925 | Kiss Me Again                         | Miss Me Again                         | Lubitsch, Ernst                  | Wesley Ruggles       | tt0425256 |
| 1746572258 | 1931 | 1931 | Trader Horn                           | Trader Horn                           | Van Dyke, W. S.                  | W.S. Van Dyke        | tt0022495 |
| 1746582134 | 1951 | 1951 | The Brave Bulls                       | The Brave Bulls                       | Rossen, Robert                   | Robert Rossen        | tt0043359 |
| 1746393999 | 1989 | 1989 | New York Stories                      | New York Stories                      |                                  | Woody Allen          | tt0097965 |
| 1746514470 | 1922 | 1922 | Chain Lightning                       | Chain Lightning                       | Wilson, Ben                      | Ben F. Wilson        | tt0013005 |
| 1746409696 | 1986 | 1986 | One More Saturday Night               | One More Saturday Night               | Klein, Dennis                    | Dennis Klein         | tt0091681 |
| 1746419158 | 1986 | 1986 | From Beyond                           | From Beyond                           | Gordon, Stuart                   | Stuart Gordon        | tt0091083 |
| 1746584559 | 1931 | 1931 | Born to Love                          | Born to Love                          | Stein, Paul L.                   | Paul L. Stein        | tt0021684 |
| 1746516295 | 1922 | 1922 | The Lying Truth                       | The Lying Truth                       | Fairfax, Marion                  | Marion Fairfax       | tt0013348 |
| 1746410604 | 1988 | 1988 | Moving                                | Moving                                | Metter, Alan                     | Alan Metter          | tt0095662 |
| 1746437429 | 1942 | 1942 | Raiders of the West                   | Raiders of the West                   | Stewart, Peter                   | Sam Newfield         | tt0035237 |
| 1746578068 | 1938 | 1938 | The Storm                             | The Storm                             | Young, Harold                    | Harold Young         | tt0030800 |
| 1746583722 | 1930 | 1930 | See America Thirst                    | See America Thirst                    | Craft, William James             | William James Craft  | tt0021354 |
| 1746509550 | 1925 | 1925 | West of Arizona                       | West of Arizona                       | Gibson, Tom                      | Tom Gibson           | tt0177371 |
| 1746561417 | 1932 | 1932 | Strangers of the Evening              | Strangers of the Evening              | Humberstone, H. Bruce            | H. Bruce Humberstone | tt0023528 |
| 1746235199 | 1976 | 1975 | The Giant Spider Invasion             | The Giant Spider Invasion             | Rebane, Bill                     | Bill Rebane          | tt0073043 |
| 1746408897 | 1982 | 1982 | A Midsummer Night's Sex Comedy        | A Midsummer Night's Sex Comedy        | Allen, Woody                     | Woody Allen          | tt0084329 |
| 1746580851 | 1938 | 1938 | Little Miss Roughneck                 | Little Miss Roughneck                 | Scotto, Aubrey                   | Aubrey Scotto        | tt0030373 |
| 1746465331 | 1947 | 1947 | The Sin of Harold Diddlebock          | The Sin of Harold Diddlebock          | Sturges, Preston                 | Preston Sturges      | tt0039825 |
| 1746409931 | 1990 | 1990 | Awakenings                            | Awakenings                            | Marshall, Penny                  | Penny Marshall       | tt0099077 |
| 1746581778 | 1930 | 1930 | The Social Lion                       | The Social Lion                       | Sutherland, A. Edward            | A. Edward Sutherland | tt0021396 |
| 1746501292 | 1913 | 1913 | The Inside of the White Slave Traffic | The Inside of the White Slave Traffic | Beal, Frank                      | Frank Beal           | tt0003016 |
| 1746524777 | 1928 | 1928 | Old Age Handicap                      | Old Age Handicap                      | Mattison, Frank S.               | Frank S. Mattison    | tt0144533 |
| 1746584277 | 1939 | 1939 | Western Caravans                      | Western Caravans                      | Nelson, Sam                      | Sam Nelson           | tt0032120 |
| 1746433734 | 1999 | 1999 | Austin Powers: The Spy Who Shagged Me | Austin Powers: The Spy Who Shagged Me | Roach, Jay                       | Jay Roach            | tt0145660 |
| 1746502992 | 1916 | 1916 | The Ninety and Nine                   | The Ninety and Nine                   | Ince, Ralph W.                   | Ralph Ince           | tt0007129 |
| 1746420392 | 1981 | 1981 | Friday the 13th Part 2                | Friday the 13th Part 2                | Miner, Steve                     | Steve Miner          | tt0082418 |
| 1746186405 | 1969 | 1969 | From Nashville With Music             | From Nashville with Music             | Crandall, Eddie; Patrick, Robert | Eddie Crandall       | tt0064348 |
| 1746509253 | 1927 | 1927 | The Silver Slave                      | The Silver Slave                      | Bretherton, Howard               | Howard Bretherton    | tt0018405 |
| 1746563807 | 1951 | 1951 | Teresa                                | Teresa                                | Zinnemann, Fred                  | Fred Zinnemann       | tt0044112 |
| 1746500311 | 1950 | 1950 | Colorado Ranger                       | Colorado Ranger                       | Carr, Thomas                     | Thomas Carr          | tt0042337 |
| 1746514895 | 1927 | 1927 | Code of the Cow Country               | Code of the Cow Country               | Apfel, Oscar                     | Oscar Apfel          | tt0017763 |
| 1746565471 | 1952 | 1952 | Man from the Black Hills              | Man from the Black Hills              | Carr, Thomas                     | Thomas Carr          | tt0044873 |
| 1746581808 | 1951 | 1951 | The Tanks Are Coming                  | The Tanks Are Coming                  | Seiler, Lewis                    | Lewis Seiler         | tt0044106 |
| 1746584722 | 1929 | 1929 | The Hole in the Wall                  | The Hole in the Wall                  | Florey, Robert                   | Robert Florey        | tt0019992 |
| 1746408855 | 1986 | 1986 | The Wraith                            | The Wraith                            | Marvin, Mike                     | Mike Marvin          | tt0092240 |
| 1746520837 | 1950 | 1950 | American Guerrilla in the Philippines | American Guerrilla in the Philippines | Lang, Fritz                      | Fritz Lang           | tt0042195 |
| 1745375188 | 2010 | 2010 | Iron Man 2                            | Iron Man 2                            | Favreau, Jon                     | Jon Favreau          | tt1228705 |
| 1746256141 | 1975 | 1975 | Mitchell                              | Mitchell                              | McLaglen, Andrew V.              | Andrew V. McLaglen   | tt0073396 |
| 1746455168 | 1995 | 1995 | Jury Duty                             | Jury Duty                             | Fortenberry, John                | John Fortenberry     | tt0113500 |
| 1746520764 | 1950 | 1950 | Francis                               | Francis                               | Lubin, Arthur                    | Arthur Lubin         | tt0041387 |
| 1746570833 | 1933 | 1933 | Smoky                                 | Smoky                                 | Forde, Eugene                    | Eugene Forde         | tt0024577 |
| 1746580219 | 1938 | 1938 | Lightning Carson Rides Again          | Lightning Carson Rides Again          | Newfield, Sam                    | Sam Newfield         | tt0030366 |
| 1746565325 | 1932 | 1932 | The Fighting Gentleman                | The Fighting Gentleman                | Newmeyer, Fred                   | Fred C. Newmeyer     | tt0022885 |
| 1746208833 | 1968 | 1968 | The Horse in the Gray Flannel Suit    | The Horse in the Gray Flannel Suit    | Tokar, Norman                    | Norman Tokar         | tt0063091 |
| 1746436049 | 1943 | 1943 | A Lady Takes a Chance                 | A Lady Takes a Chance                 | Seiter, William A.               | William A. Seiter    | tt0036092 |
| 1746584773 | 1929 | 1929 | They Had To See Paris                 | They Had to See Paris                 | Borzage, Frank                   | Frank Borzage        | tt0020490 |
| 1746509230 | 1927 | 1927 | One-Round Hogan                       | One Round Hogan                       | Bretherton, Howard               | Howard Bretherton    | tt0018231 |



|            |      |      |                               |                               |                                 |                        |           |
|------------|------|------|-------------------------------|-------------------------------|---------------------------------|------------------------|-----------|
| 1746577995 | 1937 | 1937 | Cheyenne Rides Again          | Cheyenne Rides Again          | Hill, Bob                       | Robert F. Hill         | tt0028712 |
| 1746502856 | 1915 | 1915 | June Friday                   | June Friday                   | McRae, Duncan                   | Duncan McRae           | tt0005580 |
| 1746210573 | 1970 | 1970 | Husbands                      | Husbands                      | Cassavetes, John                | John Cassavetes        | tt0065867 |
| 1746422245 | 1993 | 1993 | Swing Kids                    | Swing Kids                    | Carter, Thomas                  | Thomas Carter          | tt0108265 |
| 1746555229 | 1955 | 1955 | Oklahoma!                     | Oklahoma!                     | Zinnemann, Fred                 | Fred Zinnemann         | tt0048445 |
| 1746514755 | 1915 | 1915 | The Lonesome Heart            | The Lonesome Heart            |                                 | William Desmond Taylor | tt0005645 |
| 1746583443 | 1930 | 1930 | Beyond the Law                | Beyond the Law                | McGowan, J. P.                  | J.P. McGowan           | tt0020681 |
| 1746491950 | 1944 | 1943 | Destination Tokyo             | Destination Tokyo             | Daves, Delmer                   | Delmer Daves           | tt0035799 |
| 1746581420 | 1950 | 1950 | Walk Softly, Stranger         | Walk Softly, Stranger         | Stevenson, Robert               | Robert Stevenson       | tt0043118 |
| 1746553743 | 1964 | 1964 | The World of Henry Orient     | The World of Henry Orient     | Hill, George Roy                | George Roy Hill        | tt0058756 |
| 1745373076 | 2004 | 2004 | The Hillside Strangler        | The Hillside Strangler        | Parello, Chuck                  | Chuck Parello          | tt0376649 |
| 1746508460 | 1926 | 1926 | Midnight Limited              | The Midnight Limited          | Apfel, Oscar                    | Oscar Apfel            | tt0017141 |
| 1746576329 | 1931 | 1931 | The Ridin' Fool               | The Ridin' Fool               | McCarthy, J. P.                 | John P. McCarthy       | tt0022316 |
| 1746583184 | 1930 | 1930 | Breed of the West             | Breed of the West             | Neitz, Alvin J.                 | Alan James             | tt0020709 |
| 1746219067 | 1980 | 1980 | Midnight Madness              | Midnight Madness              | Wechter, David; Nankin, Michael | Michael Nankin         | tt0081159 |
| 1746580254 | 1936 | 1936 | Girl of the Ozarks            | Girl of the Ozarks            | Shea, William                   | William Shea           | tt0027675 |
| 1746582170 | 1928 | 1928 | The Stronger Will             | The Stronger Will             | McEveety, Bernard               | Bernard McEveety       | tt0019433 |
| 1746500376 | 1924 | 1924 | Laughing at Danger            | Laughing at Danger            | Horne, James W.                 | James W. Horne         | tt0015053 |
| 1746408899 | 1990 | 1990 | Side Out                      | Side Out                      | Israelson, Peter                | Peter Israelson        | tt0100613 |
| 1746508166 | 1950 | 1950 | A Modern Marriage             | A Modern Marriage             | Landres, Paul                   | Paul Landres           | tt0042743 |
| 1746233240 | 1968 | 1968 | The Name of the Game Is Kill! | The Name of the Game Is Kill! | Hellström, Gunnar               | Gunnar Hellström       | tt0063335 |
| 1746569878 | 1960 | 1960 | Seven Thieves                 | Seven Thieves                 | Hathaway, Henry                 | Henry Hathaway         | tt0054295 |
| 1746583691 | 1928 | 1928 | Confessions of a Wife         | Confessions of a Wife         | Kelly, Albert                   | Albert H. Kelley       | tt0018788 |
| 1746197968 | 1965 | 1965 | The Hallelujah Trail          | The Hallelujah Trail          | Sturges, John                   | John Sturges           | tt0059250 |
| 1745372399 | 2010 | 2010 | All Good Things               | All Good Things               | Jarecki, Andrew                 | Andrew Jarecki         | tt1175709 |
| 1746515270 | 1920 | 1920 | Into the Light                | Into the Light                | Bradbury, Robert North          | Robert N. Bradbury     | tt0012749 |
| 1745358055 | 2002 | 2002 | Deuces Wild                   | Deuces Wild                   | Kalvert, Scott                  | Scott Kalvert          | tt0231448 |
| 1746581709 | 1930 | 1930 | Shooting Straight             | Shooting Straight             | Archainbaud, George             | George Archainbaud     | tt0029369 |
| 1746520168 | 1926 | 1926 | The Broadway Boob             | The Broadway Boob             | Henabery, Joseph                | Joseph Henabery        | tt0016682 |
| 1746198425 | 1969 | 1969 | Paint Your Wagon              | Paint Your Wagon              | Logan, Joshua                   | Joshua Logan           | tt0064782 |
| 1746574312 | 1960 | 1960 | Violent Women                 | Violent Women                 | Mahon, Barry                    | Barry Mahon            | tt0053424 |
| 1746582513 | 1937 | 1937 | Once a Doctor                 | Once a Doctor                 | Clemens, William                | William Clemens        | tt0029346 |
| 1746500629 | 1926 | 1926 | Rocking Moon                  | Rocking Moon                  | Melford, George                 | George Melford         | tt0017331 |
| 1746219064 | 1972 | 1972 | Hammer                        | Hammer                        | Clark, Bruce                    | Bruce D. Clark         | tt0068673 |
| 1746555216 | 1955 | 1955 | Stranger on Horseback         | Stranger on Horseback         | Tourneur, Jacques               | Jacques Tourneur       | tt0048666 |
| 1746561120 | 1932 | 1932 | Western Limited               | The Western Limited           | Cabanne, Christy                | Christy Cabanne        | tt0023683 |
| 1745373185 | 2003 | 2003 | Camp                          | Camp                          | Graff, Todd                     | Todd Graff             | tt0342167 |
| 1746520711 | 1926 | 1926 | Salt Lake Trail               | Salt Lake Trail               |                                 |                        | tt0161954 |
| 1746581573 | 1928 | 1928 | The Road to Ruin              | The Road to Ruin              | Parker, Norton S.               | Dorothy Davenport      | tt0019332 |
| 1746199198 | 1966 | 1966 | The Bed and How To Make It!   | The Bed and How to Make It!   | Sarno, Joe                      | Joseph W. Sarno        | tt0058961 |
| 1746422221 | 1999 | 1999 | Life                          | Life                          | Demme, Ted                      | Ted Demme              | tt0123964 |
| 1746492747 | 1948 | 1948 | My Girl Tisa                  | My Girl Tisa                  | Nugent, Elliott                 | Elliott Nugent         | tt0040628 |
| 1769971987 | 1969 | 1969 | Dare the Devil                | Dare the Devil                | Emery, Robert J.                | Robert J. Emery        | tt0216660 |
| 1746434602 | 1997 | 1997 | The Pest                      | The Pest                      | Miller, Paul                    | Paul Miller            | tt0119887 |
| 1746495799 | 1919 | 1920 | Puppy Love                    | Puppy Love                    | Neill, R. William               |                        | tt1666062 |
| 1746520879 | 1948 | 1948 | The Rangers Ride              | The Rangers Ride              | Abrahams, Derwin                | Derwin Abrahams        | tt0179444 |
| 1746454685 | 1942 | 1942 | Holiday Inn                   | Holiday Inn                   | Sandrich, Mark                  | Mark Sandrich          | tt0034862 |
| 1746563481 | 1952 | 1952 | Cattle Town                   | Cattle Town                   | Smith, Noel                     | Noel M. Smith          | tt0044490 |
| 1746580790 | 1935 | 1935 | Gun Play                      | Gun Play                      | Herman, Al                      | Albert Herman          | tt0026445 |
| 1746533205 | 1915 | 1915 | York State Folks              | York State Folks              | Jackson, Harry                  | Harry Jackson          | tt0006325 |
| 1746523039 | 1916 | 1916 | The Combat                    | The Combat                    | Ince, Ralph W.                  | Ralph Ince             | tt0006537 |
| 1746584293 | 1939 | 1939 | Everything Happens at Night   | Everything Happens at Night   | Cummings, Irving                | Irving Cummings        | tt0031285 |
| 1746507805 | 1926 | 1926 | The Warning Signal            | The Warning Signal            | Hunt, Charles                   | Charles J. Hunt        | tt0017528 |
| 1746508559 | 1949 | 1949 | Top O' the Morning            | Top o' the Morning            | Miller, David                   | David Miller           | tt0041969 |
| 1746422026 | 1998 | 1998 | Small Soldiers                | Small Soldiers                | Dante, Joe                      | Joe Dante              | tt0122718 |
| 1746249250 | 1980 | 1980 | Coal Miner's Daughter         | Coal Miner's Daughter         | Apted, Michael                  | Michael Apted          | tt0080549 |
| 1746258479 | 1979 | 1978 | The Legacy                    | The Legacy                    | Marquand, Richard               | Richard Marquand       | tt0079450 |

|            |      |      |                                              |                                              |                                   |                         |           |
|------------|------|------|----------------------------------------------|----------------------------------------------|-----------------------------------|-------------------------|-----------|
| 1746217888 | 1966 | 1966 | Born Free                                    | Born Free                                    | Hill, James                       | James Hill              | tt0060182 |
| 1746502356 | 1915 | 1915 | The Lion's Mate                              | The Lion's Mate                              | Santschi, Thomas                  | Tom Santschi            | tt0490608 |
| 1746523553 | 1916 | 1916 | Should a Baby Die?                           | Should a Baby Die?                           | Vekroff, Perry N.                 | Perry N. Vekroff        | tt0158952 |
| 1746565980 | 1953 | 1953 | Raiders of the Seven Seas                    | Raiders of the Seven Seas                    | Salkow, Sidney                    | Sidney Salkow           | tt0046223 |
| 1746454043 | 1941 | 1941 | The Strawberry Blonde                        | The Strawberry Blonde                        | Walsh, Raoul                      | Raoul Walsh             | tt0034236 |
| 1746581103 | 1951 | 1951 | Cry Danger                                   | Cry Danger                                   | Parrish, Robert                   | Robert Parrish          | tt0043435 |
| 1746573407 | 1932 | 1932 | Penguin Pool Murder                          | The Penguin Pool Murder                      | Archainbaud, George               | George Archainbaud      | tt0023327 |
| 1746567121 | 1932 | 1932 | Forbidden Trail                              | Forbidden Trail                              | Hillyer, Lambert                  | Lambert Hillyer         | tt0024029 |
| 1745359635 | 2004 | 2004 | Kinsey                                       | Kinsey                                       | Condon, Bill                      | Bill Condon             | tt0362269 |
| 1746583032 | 1939 | 1939 | Ninotchka                                    | Ninotchka                                    | Lubitsch, Ernst                   | Ernst Lubitsch          | tt0031725 |
| 1745394096 | 2010 | 2009 | Winnebago Man                                | Winnebago Man                                | Steinbauer, Ben                   | Ben Steinbauer          | tt1396557 |
| 1746513441 | 1927 | 1927 | The Clown                                    | The Clown                                    | Craft, William James              | William James Craft     | tt0017761 |
| 1746525011 | 1915 | 1915 | The Making of Crooks                         | The Making of Crooks                         | Daly, William Robert              | William Robert Daly     | tt0812283 |
| 1769970553 | 1968 | 1968 | Michelene and the Device                     | Michelene and the Device                     | Roberts, R. Jack                  | Robert L. Roberts       | tt0251264 |
| 1746423285 | 1996 | 1996 | The Birdcage                                 | The Birdcage                                 | Nichols, Mike                     | Mike Nichols            | tt0115685 |
| 1746582491 | 1935 | 1935 | Red Salute                                   | Red Salute                                   | Lanfield, Sidney                  | Sidney Lanfield         | tt0026919 |
| 1746570744 | 1934 | 1934 | Flirtation                                   | Flirtation                                   | Birinski, Leo                     | Leo Birinski            | tt0026367 |
| 1746394527 | 1982 | 1982 | Jimmy the Kid                                | Jimmy the Kid                                | Nelson, Gary                      | Gary Nelson             | tt0085756 |
| 1746499913 | 1923 | 1923 | The French Doll                              | The French Doll                              | Leonard, Robert Z.                | Robert Z. Leonard       | tt0014060 |
| 1746509531 | 1925 | 1925 | The Rag Man                                  | The Rag Man                                  | Cline, Edward F.                  | Edward F. Cline         | tt0016258 |
| 1769969933 | 1911 | 1911 | Desperate Desmond Abducts Rosamond           | Desperate Desmond Abducts Rosamond           |                                   | Tom Ricketts            | tt0213603 |
| 1746562281 | 1954 | 1954 | King Richard and the Crusaders               | King Richard and the Crusaders               | Butler, David                     | David Butler            | tt0047150 |
| 1746584937 | 1940 | 1940 | Vigil in the Night                           | Vigil in the Night                           | Stevens, George                   | George Stevens          | tt0033221 |
| 1746498680 | 1920 | 1920 | April Folly                                  | April Folly                                  | Leonard, Robert Z.                | Robert Z. Leonard       | tt0010964 |
| 1746520970 | 1949 | 1949 | Bagdad                                       | Bagdad                                       | Lamont, Charles                   | Charles Lamont          | tt0041149 |
| 1769972174 | 1962 | 1962 | The Wild and the Naked                       | The Wild and the Naked                       | Roberts, Stan                     | Stan Roberts            | tt0153836 |
| 1746569947 | 1958 | 1958 | The Proud Rebel                              | The Proud Rebel                              | Curtiz, Michael                   | Michael Curtiz          | tt0052097 |
| 1746422543 | 1989 | 1989 | The Dream Team                               | The Dream Team                               | Zieff, Howard                     | Howard Zieff            | tt0097235 |
| 1746503326 | 1918 | 1918 | The Return of Mary                           | The Return of Mary                           | Lucas, Wilfred                    | Wilfred Lucas           | tt0009542 |
| 1746584813 | 1929 | 1929 | Dynamite                                     | Dynamite                                     | De Mille, Cecil B.                | Cecil B. DeMille        | tt0019843 |
| 1746514593 | 1923 | 1923 | Crimson Gold                                 | Crimson Gold                                 | Elfelt, Clifford S.               | Clifford S. Elfelt      | tt0013957 |
| 1746422583 | 1989 | 1988 | 976-EVIL                                     | 976-EVIL                                     | Englund, Robert                   | Robert Englund          | tt0094597 |
| 1746235425 | 1972 | 1972 | Super Fly                                    | Super Fly                                    | Parks, Gordon                     | Gordon Parks Jr.        | tt0069332 |
| 1746233985 | 1968 | 1968 | The Brotherhood                              | The Brotherhood                              | Ritt, Martin                      | Martin Ritt             | tt0062760 |
| 1746421325 | 1992 | 1992 | Venice/Venice                                | Venice/Venice                                | Jaglom, Henry                     | Henry Jaglom            | tt0105729 |
| 1746434997 | 1991 | 1991 | Dice Rules                                   | Dice Rules                                   | Dubin, Jay                        | Jay Dubin               | tt0101726 |
| 1746580964 | 1960 | 1960 | CinderFella                                  | Cinderfella                                  | Tashlin, Frank                    | Frank Tashlin           | tt0053716 |
| 1746567338 | 1933 | 1933 | Stage Mother                                 | Stage Mother                                 | Brabin, Charles                   | Charles Brabin          | tt0024609 |
| 1746435726 | 1940 | 1940 | The Saint Takes Over                         | The Saint Takes Over                         | Hively, Jack                      | Jack Hively             | tt0033013 |
| 1746465363 | 1942 | 1942 | Flight Lieutenant                            | Flight Lieutenant                            | Salkow, Sidney                    | Sidney Salkow           | tt0034739 |
| 1746502939 | 1922 | 1922 | Forsaking All Others                         | Forsaking All Others                         | Chautard, Emile                   | Emile Chautard          | tt0013147 |
| 1746581125 | 1910 | 1910 | The Light in the Window                      | The Light in the Window                      |                                   | Ray Myers               | tt0489196 |
| 1746584719 | 1928 | 1928 | The Cowboy Prince                            | The Cowboy Prince                            |                                   | Ben F. Wilson           | tt0321775 |
| 1769976729 | 1929 | 1929 | The Framing Of The Shrew                     | The Framing of the Shrew                     | Gillstrom, Arvid E.               | Arvid E. Gillstrom      | tt0363619 |
| 1746218986 | 1973 | 1973 | Bummer                                       | Bummer                                       | Castleman, William Allen          | William Allen Castleman | tt0068324 |
| 1746434377 | 1991 | 1991 | Hearts of Darkness: A Filmmaker's Apocalypse | Hearts of Darkness: A Filmmaker's Apocalypse | Bahr , Fax ; Hickenlooper, George | Fax Bahr                | tt0102015 |
| 1746233994 | 1966 | 1966 | The Plainsman                                | The Plainsman                                | Rich, David Lowell                | David Lowell Rich       | tt0060842 |
| 1746574931 | 1934 | 1934 | A Woman's Man                                | A Woman's Man                                | Ludwig, Edward T.                 | Edward Ludwig           | tt0026005 |
| 1746573808 | 1960 | 1960 | Visit to a Small Planet                      | Visit to a Small Planet                      | Taurog, Norman                    | Norman Taurog           | tt0054446 |
| 1746503424 | 1922 | 1922 | Slim Shoulders                               | Slim Shoulders                               | Crosland, Alan                    | Alan Crosland           | tt0013609 |
| 1746574119 | 1960 | 1960 | Pay or Die                                   | Pay or Die!                                  | Wilson, Richard                   | Richard Wilson          | tt0054164 |
| 1746583105 | 1940 | 1940 | The Kid from Santa Fe                        | The Kid from Santa Fe                        | Johnson, Raymond K.               | Bernard B. Ray          | tt0032664 |
| 1746423279 | 1993 | 1993 | Dangerous Game                               | Dangerous Game                               | Ferrara, Abel                     | Abel Ferrara            | tt0106660 |
| 1746513647 | 1927 | 1927 | American Beauty                              | The American Beauty                          | Wallace, Richard                  | Richard Wallace         | tt0017626 |
| 1746423813 | 1940 | 1940 | Lone Star Raiders                            | Lone Star Raiders                            | Sherman, George                   | George Sherman          | tt0032724 |
| 1746423970 | 1942 | 1942 | The Lone Star Vigilantes                     | The Lone Star Vigilantes                     | Fox, Wallace W.                   | Wallace Fox             | tt0034995 |
| 1746508204 | 1925 | 1925 | Timber Wolf                                  | The Timber Wolf                              | Van Dyke, William S.              | W.S. Van Dyke           | tt0016433 |

|            |      |      |                                 |                                 |                               |                                     |           |
|------------|------|------|---------------------------------|---------------------------------|-------------------------------|-------------------------------------|-----------|
| 1746514545 | 1915 | 1915 | The Money Master                | The Money Master                | Fitzmaurice, George           | George Fitzmaurice                  | tt0005764 |
| 1746423329 | 1990 | 1990 | Impulse                         | Impulse                         | Locke, Sondra                 | Sondra Locke                        | tt0099832 |
| 1746578492 | 1951 | 1951 | Meet Me After the Show          | Meet Me After the Show          | Sale, Richard                 | Richard Sale                        | tt0043795 |
| 1746584812 | 1929 | 1929 | Where East Is East              | Where East Is East              | Browning, Tod                 | Tod Browning                        | tt0020581 |
| 1746545150 | 1940 | 1940 | Youth Will Be Served            | Youth Will Be Served            | Brower, Otto                  | Otto Brower                         | tt0033291 |
| 1746525131 | 1919 | 1919 | The Midnight Stage              | The Midnight Stage              | Warde, Ernest C.              | Ernest C. Warde                     | tt0010462 |
| 1746520054 | 1924 | 1924 | The Fire Patrol                 | The Fire Patrol                 | Stromberg, Hunt               | Hunt Stromberg                      | tt0014902 |
| 1746500079 | 1950 | 1949 | Samson and Delilah              | Samson and Delilah              | DeMille, Cecil B.             | Cecil B. DeMille                    | tt0041838 |
| 1746437031 | 1940 | 1940 | Safari                          | Safari                          | Griffith, Edward H.           | Edward H. Griffith                  | tt0033009 |
| 1746563344 | 1952 | 1952 | The Raiders                     | The Raiders                     | Selander, Lesley              | Lesley Selander                     | tt0045067 |
| 1746210502 | 1971 | 1971 | Revenge Is My Destiny           | Revenge Is My Destiny           | Adler, Joseph                 | Joseph Adler                        | tt0067674 |
| 1746561567 | 1956 | 1956 | Naked Gun                       | Naked Gun                       | Dew, Edward                   | Eddie Dew                           | tt0049539 |
| 1746581972 | 1910 | 1910 | He Met the Champion             | He Met the Champion             |                               | Gilbert M. 'Broncho Billy' Anderson | tt1644591 |
| 1746491881 | 1944 | 1944 | Silent Partner                  | Silent Partner                  | Blair, George                 | George Blair                        | tt0037277 |
| 1746393310 | 1985 | 1985 | Better Off Dead...              | Better Off Dead...              | Holland, Savage Steve         | Savage Steve Holland                | tt0088794 |
| 1746420242 | 1990 | 1990 | Child's Play 2                  | Child's Play 2                  | Lafia, John                   | John Lafia                          | tt0099253 |
| 1746581681 | 1929 | 1929 | Wonder of Women                 | Wonder of Women                 | Brown, Clarence               | Clarence Brown                      | tt0020603 |
| 1746577413 | 1951 | 1951 | Callaway Went Thataway          | Callaway Went Thataway          | Panama, Norman; Frank, Melvin | Melvin Frank                        | tt0043371 |
| 1746580393 | 1939 | 1939 | Star Reporter                   | Star Reporter                   | Bretherton, Howard            | Howard Bretherton                   | tt0031975 |
| 1746409337 | 1981 | 1981 | Graduation Day                  | Graduation Day                  | Freed, Herb                   | Herb Freed                          | tt0082467 |
| 1746453803 | 1940 | 1940 | Three Men from Texas            | Three Men from Texas            | Selander, Lesley              | Lesley Selander                     | tt0033160 |
| 1746554638 | 1963 | 1963 | Cairo                           | Cairo                           | Rilla, Wolf                   | Wolf Rilla                          | tt0056894 |
| 1746585017 | 1940 | 1940 | The Mark of Zorro               | The Mark of Zorro               | Mamoulian, Rouben             | Rouben Mamoulian                    | tt0032762 |
| 1746218769 | 1972 | 1972 | Bonnie's Kids                   | Bonnie's Kids                   | Marks, Arthur                 | Arthur Marks                        | tt0083677 |
| 1746485172 | 1918 | 1918 | Conquered Hearts                | Conquered Hearts                | Grandon, Francis J.           | Francis J. Grandon                  | tt0184355 |
| 1746503756 | 1918 | 1918 | The Yellow Dog                  | The Yellow Dog                  | Campbell, Colin               | Colin Campbell                      | tt0009841 |
| 1746455868 | 1996 | 1996 | Mr. Wrong                       | Mr. Wrong                       | Castle, Nick                  | Nick Castle                         | tt0117102 |
| 1746574990 | 1934 | 1934 | Song of the Islands             | Song of the Islands             |                               | George Tahara                       | tt6843588 |
| 1746532633 | 1916 | 1916 | Extravagance                    | Extravagance                    | King, Burton L.               | Burton L. King                      | tt0157607 |
| 1746516288 | 1921 | 1921 | The Stampede                    | The Stampede                    | Ford, Francis                 | Francis Ford                        | tt0166816 |
| 1746576609 | 1932 | 1932 | Come On, Tarzan                 | Come On, Tarzan                 | James, Alan                   | Alan James                          | tt0022773 |
| 1746496832 | 1920 | 1920 | The Web of Deceit               | The Web of Deceit               | Carewe, Edwin                 | Edwin Carewe                        | tt0011842 |
| 1746580934 | 1961 | 1960 | Pepe                            | Pepe                            | Sidney, George                | George Sidney                       | tt0054172 |
| 1746570333 | 1934 | 1934 | Imitation of Life               | Imitation of Life               | Stahl, John M.                | John M. Stahl                       | tt0025301 |
| 1746497000 | 1919 | 1919 | Fruits of Passion               | Fruits of Passion               | Ridgwell, George              | George Ridgwell                     | tt0162336 |
| 1746503478 | 1920 | 1920 | My Lady's Garter                | My Lady's Garter                | Tourneur, Maurice             | Maurice Tourneur                    | tt0011493 |
| 1746474533 | 1944 | 1944 | The Navy Way                    | The Navy Way                    | Berke, William                | William Berke                       | tt0037121 |
| 1746219645 | 1974 | 1973 | The Outfit                      | The Outfit                      | Flynn, John                   | John Flynn                          | tt0071960 |
| 1745374158 | 2004 | 2003 | National Lampoon's Gold Diggers | National Lampoon's Gold Diggers | Preisler, Gary                | Gary Preisler                       | tt0376717 |
| 1746437340 | 1942 | 1942 | Texas Trouble Shooters          | Texas Trouble Shooters          | Luby, S. Roy                  | S. Roy Luby                         | tt0158267 |
| 1746508993 | 1925 | 1925 | Blood and Steel                 | Blood and Steel                 | McGowan, J. P.                | J.P. McGowan                        | tt0015629 |
| 1746453574 | 1944 | 1944 | Broadway Rhythm                 | Broadway Rhythm                 | Del Ruth, Roy                 | Roy Del Ruth                        | tt0036673 |
| 1746569891 | 1956 | 1956 | The Flesh Merchant              | The Flesh Merchant              | Connell, W. Merle             | W. Merle Connell                    | tt0124578 |
| 1746500480 | 1925 | 1925 | Blue Blood                      | Blue Blood                      | Dunlap, Scott                 | Scott R. Dunlap                     | tt0015631 |
| 1746454242 | 1941 | 1941 | Affectionately Yours            | Affectionately Yours            | Bacon, Lloyd                  | Lloyd Bacon                         | tt0033319 |
| 1746582213 | 1930 | 1929 | General Crack                   | General Crack                   | Crosland, Alan                | Alan Crosland                       | tt0020915 |
| 1746571331 | 1935 | 1935 | Stars over Broadway             | Stars over Broadway             | Keighley, William             | William Keighley                    | tt0027041 |
| 1746567556 | 1952 | 1952 | Stolen Face                     | Stolen Face                     | Fisher, Terence               | Terence Fisher                      | tt0045191 |
| 1769969938 | 1912 | 1912 | Linked Together                 | Linked Together                 |                               | C.J. Williams                       | tt0490607 |
| 1746585380 | 1939 | 1939 | What a Life                     | What a Life                     | Reed, Jay Theodore            | Theodore Reed                       | tt0032123 |
| 1746582833 | 1935 | 1935 | Traveling Saleslady             | Traveling Saleslady             | Enright, Ray                  | Ray Enright                         | tt0027133 |
| 1746514548 | 1914 | 1914 | The Circus Man                  | The Circus Man                  | Apfel, Oscar C.               | Oscar Apfel                         | tt0003774 |
| 1746534801 | 1922 | 1922 | Thorns and Orange Blossoms      | Thorns and Orange Blossoms      | Gasnier, Louis J.             | Louis J. Gasnier                    | tt0013671 |
| 1746572045 | 1910 | 1910 | The Deacon's Daughter           | The Deacon's Daughter           |                               | Sidney Olcott                       | tt0397385 |
| 1746394387 | 1986 | 1986 | A Fine Mess                     | A Fine Mess                     | Edwards, Blake                | Blake Edwards                       | tt0091051 |
| 1746464997 | 1945 | 1945 | The Jade Mask                   | The Jade Mask                   | Rosen, Phil                   | Phil Rosen                          | tt0037826 |
| 1746502719 | 1922 | 1922 | The Flaming Hour                | The Flaming Hour                | Sedgwick, Edward              | Edward Sedgwick                     | tt0013133 |

|                   |             |             |                                                 |                                             |                                       |                          |                  |
|-------------------|-------------|-------------|-------------------------------------------------|---------------------------------------------|---------------------------------------|--------------------------|------------------|
| 1746464901        | 1942        | 1942        | The Forest Rangers                              | The Forest Rangers                          | Marshall, George                      | George Marshall          | tt0034749        |
| 1746566363        | 1957        | 1957        | Affair in Reno                                  | Affair in Reno                              | Springsteen, R. G.                    | R.G. Springsteen         | tt0050104        |
| 1746515572        | 1918        | 1918        | The Forbidden Path                              | The Forbidden Path                          | Edwards, J. Gordon                    | J. Gordon Edwards        | tt0009087        |
| 1769977748        | 1981        | 1980        | Hardly Working                                  | Hardly Working                              | Lewis, Jerry                          | Jerry Lewis              | tt0082501        |
| 1746533001        | 1916        | 1916        | The Law Decides                                 | The Law Decides                             | Bertsch, Marguerite; Earle, William F | Marguerite Bertsch       | tt0163048        |
| 1746393089        | 1988        | 1988        | Beetle Juice                                    | Beetlejuice                                 | Burton, Tim                           | Tim Burton               | tt0094721        |
| 1746475915        | 1943        | 1943        | Tahiti Honey                                    | Tahiti Honey                                | Auer, John H.                         | John H. Auer             | tt0140592        |
| <b>1746580872</b> | <b>1935</b> | <b>1935</b> | <b>Eight Bells</b>                              | <b>Eight Bells</b>                          | <b>Neill, Roy William</b>             | <b>Roy William Neill</b> | <b>tt0026307</b> |
| 1746582873        | 1935        | 1935        | Charlie Chan in Paris                           | Charlie Chan in Paris                       | Seiler, Lewis                         | Lewis Seiler             | tt0026198        |
| 1746520766        | 1926        | 1926        | Men Women Love                                  | The Men Women Love                          | Dierker, Hugh                         |                          | tt1690533        |
| 1746512598        | 1927        | 1927        | The Broken Violin                               | The Broken Violin                           | Micheaux, Oscar                       | Oscar Micheaux           | tt0017708        |
| 1746508039        | 1949        | 1949        | A Dangerous Profession                          | A Dangerous Profession                      | Tetzlaff, Ted                         | Ted Tetzlaff             | tt0041278        |
| 1746465034        | 1942        | 1942        | One Thrilling Night                             | One Thrilling Night                         | Beaudine, William                     | William Beaudine         | tt0035152        |
| 1746516334        | 1921        | 1921        | Making the Grade                                | Making the Grade                            | Butler, Fred J.                       | Fred J. Butler           | tt0133082        |
| 1746578588        | 1963        | 1963        | Red Runs the River                              | Red Runs the River                          | Stenholm, Katherine                   | Katherine Stenholm       | tt0435318        |
| 1746583486        | 1951        | 1951        | Strangers on a Train                            | Strangers on a Train                        | Hitchcock, Alfred                     | Alfred Hitchcock         | tt0044079        |
| 1769971976        | 1969        | 1969        | The Erotic Circus                               | The Erotic Circus                           | Sullivan, Ron                         | Henri Pachard            | tt0217442        |
| 1746561415        | 1932        | 1932        | No One Man                                      | No One Man                                  | Corrigan, Lloyd                       | Lloyd Corrigan           | tt0023279        |
| 1746584199        | 1936        | 1936        | Laughing Irish Eyes                             | Laughing Irish Eyes                         | Santley, Joseph                       | Joseph Santley           | tt0027871        |
| 1746572013        | 1931        | 1931        | His Woman                                       | His Woman                                   | Sloman, Edward                        | Edward Sloman            | tt0021963        |
| 1769970605        | 1966        | 1966        | Mondo Freudo                                    | Mondo Freudo                                | Frost, R. L.                          | Lee Frost                | tt0063321        |
| 1746569796        | 1958        | 1958        | Let's Rock                                      | Let's Rock                                  | Foster, Harry                         | Harry Foster             | tt0051856        |
| 1746567330        | 1952        | 1952        | The Rose Bowl Story                             | The Rose Bowl Story                         | Beaudine, William                     | William Beaudine         | tt0045104        |
| 1746532965        | 1927        | 1927        | Black Tears                                     | Black Tears                                 | Gorman, John                          | John Gorman              | tt0017680        |
| 1746182716        | 1910        | 1910        | The Call                                        | The Call                                    | Griffith, D. W.                       | D.W. Griffith            | tt0001144        |
| 1746581914        | 1928        | 1928        | Silent Trail                                    | Silent Trail                                | McGowan, J. P.                        | J.P. McGowan             | tt0019384        |
| 1745309416        | 2005        | 2005        | Charlie and the Chocolate Factory               | Charlie and the Chocolate Factory           | Burton, Tim                           | Tim Burton               | tt0367594        |
| 1769971181        | 1969        | 1969        | The Ramrod                                      | The Ramrod                                  | Guylder, Van                          | Ed Forsyth               | tt0127207        |
| 1746524615        | 1923        | 1923        | Nobody's Bride                                  | Nobody's Bride                              | Blaché, Herbert                       | Herbert Blaché           | tt0014311        |
| 1746495806        | 1919        | 1919        | Peg O' My Heart                                 | Peg o' My Heart                             | Mille, William C. de                  | William C. de Mille      | tt0338339        |
| 1746581576        | 1961        | 1961        | Man-Trap                                        | Man Trap                                    | O'Brien, Edmond                       | Edmond O'Brien           | tt0055134        |
| 1746543067        | 1915        | 1915        | The House of a Thousand Candles                 | The House of a Thousand Candles             | Heffron, Thomas N.                    | Thomas N. Heffron        | tt0005517        |
| 1746500149        | 1925        | 1925        | Flattery                                        | Flattery                                    | Forman, Tom                           | Tom Forman               | tt0015822        |
| 1746211092        | 1973        | 1973        | Executive Action                                | Executive Action                            | Miller, David                         | David Miller             | tt0070046        |
| 1746573950        | 1960        | 1960        | The Alamo                                       | The Alamo                                   | Wayne, John                           | John Wayne               | tt0053580        |
| 1746574455        | 1933        | 1933        | One Man's Journey                               | One Man's Journey                           | Robertson, John                       | John S. Robertson        | tt0024411        |
| 1746525017        | 1921        | 1921        | The Smart Sex                                   | The Smart Sex                               | Granville, Fred Leroy                 | Fred LeRoy Granville     | tt0012703        |
| 1746218765        | 1975        | 1975        | Dr. Minx                                        | Dr. Minx                                    | Avedis, Hikmet                        | Howard Avedis            | tt0072905        |
| 1746553466        | 1964        | 1964        | Diary of a Bachelor                             | Diary of a Bachelor                         | Howard, Sandy                         | Sandy Howard             | tt0058012        |
| 1745282695        | 2007        | 2006        | The Last Winter                                 | The Last Winter                             | Fessenden, Larry                      | Larry Fessenden          | tt0454864        |
| 1746573782        | 1958        | 1958        | The Return of Dracula                           | The Return of Dracula                       | Landres, Paul                         | Paul Landres             | tt0052131        |
| 1746582296        | 1930        | 1930        | Big Boy                                         | Big Boy                                     | Crosland, Alan                        | Alan Crosland            | tt0020683        |
| 1745341770        | 2001        | 2001        | The Last Castle                                 | The Last Castle                             | Lurie, Rod                            | Rod Lurie                | tt0272020        |
| 1746516143        | 1920        | 1920        | The Blooming Angel                              | The Blooming Angel                          | Schertzing, Victor L.                 | Victor Schertzing        | tt0122407        |
| 1746574246        | 1959        | 1959        | A Private's Affair                              | A Private's Affair                          | Walsh, Raoul                          | Raoul Walsh              | tt0053192        |
| 1746465190        | 1944        | 1944        | The Heavenly Body                               | The Heavenly Body                           | Hall, Alexander                       | Alexander Hall           | tt0035980        |
| 1746554025        | 1964        | 1964        | Dr. Strangelove or: How I Learned to Stop Worry | Dr. Strangelove or: How I Learned to Stop W | Kubrick, Stanley                      | Stanley Kubrick          | tt0057012        |
| 1746424366        | 1941        | 1941        | Law of the Tropics                              | Law of the Tropics                          | Enright, Ray                          | Ray Enright              | tt0033821        |
| 1746514216        | 1910        | 1910        | The Missing Bridegroom                          | The Missing Bridegroom                      |                                       |                          | tt0001324        |
| 1746584269        | 1938        | 1938        | Swiss Miss                                      | Swiss Miss                                  | Blystone, John G.                     | John G. Blystone         | tt0030824        |
| 1746577263        | 1962        | 1962        | Tender Is the Night                             | Tender Is the Night                         | King, Henry                           | Henry King               | tt0056566        |
| 1746455804        | 1996        | 1996        | Set It Off                                      | Set It Off                                  | Gray, F. Gary                         | F. Gary Gray             | tt0117603        |
| 1745303186        | 2006        | 2006        | Basic Instinct 2                                | Basic Instinct 2                            | Caton-Jones, Michael                  | Michael Caton            | tt0430912        |
| 1746581191        | 1962        | 1962        | Incident in an Alley                            | Incident in an Alley                        | Cahn, Edward L.                       | Edward L. Cahn           | tt0056098        |
| 1746498478        | 1920        | 1920        | The Daughter of Dawn                            | The Daughter of Dawn                        | Myles, Norbert                        | Norbert A. Myles         | tt0191066        |
| 1746570397        | 1934        | 1934        | The Meanest Gal in Town                         | The Meanest Gal in Town                     | Mack, Russell                         | Russell Mack             | tt0025481        |
| 1746567611        | 1933        | 1933        | Today We Live                                   | Today We Live                               | Hawks, Howard                         | Howard Hawks             | tt0024675        |

|            |      |      |                           |                           |                               |                        |           |
|------------|------|------|---------------------------|---------------------------|-------------------------------|------------------------|-----------|
| 1746235133 | 1967 | 1967 | It's a Bikini World       | It's a Bikini World       | Rothman, Stephanie            | Stephanie Rothman      | tt0061827 |
| 1746410693 | 1986 | 1986 | The Whoopee Boys          | The Whoopee Boys          | Byrum, John                   | John Byrum             | tt0092210 |
| 1746454380 | 1945 | 1945 | Between Two Women         | Between Two Women         | Goldbeck, Willis              | Willis Goldbeck        | tt0036640 |
| 1746511805 | 1923 | 1923 | The Barefoot Boy          | The Barefoot Boy          | Kirkland, David               | David Kirkland         | tt0013860 |
| 1746577381 | 1960 | 1960 | Spartacus                 | Spartacus                 | Kubrick, Stanley              | Stanley Kubrick        | tt0054331 |
| 1769970637 | 1968 | 1968 | The Wild Females          | The Wild Females          | Samoya, Carlos                | Carlos Samoya          | tt0067986 |
| 1746421318 | 1982 | 1982 | Blade Runner              | Blade Runner              | Scott, Ridley                 | Ridley Scott           | tt0083658 |
| 1746580924 | 1951 | 1950 | The Sun Sets at Dawn      | The Sun Sets at Dawn      | Sloane, Paul H.               | Paul Sloane            | tt0044088 |
| 1746574650 | 1936 | 1936 | Road Gang                 | Road Gang                 | King, Louis                   | Louis King             | tt0028190 |
| 1746583119 | 1936 | 1936 | Desert Gold               | Desert Gold               | Hogan, James                  | James P. Hogan         | tt0027511 |
| 1746577941 | 1937 | 1937 | Hotel Haywire             | Hotel Haywire             | Archainbaud, George           | George Archainbaud     | tt0029024 |
| 1746554185 | 1963 | 1963 | Promises! Promises!       | Promises.... Promises!    | Donovan, King                 | King Donovan           | tt0057428 |
| 1746501127 | 1917 | 1917 | Strife                    | Strife                    | Hillyer, Lambert              | Lambert Hillyer        | tt0182466 |
| 1746569655 | 1957 | 1957 | April Love                | April Love                | Levin, Henry                  | Henry Levin            | tt0050135 |
| 1746566374 | 1953 | 1952 | The Jazz Singer           | The Jazz Singer           | Curtiz, Michael               | Michael Curtiz         | tt0044765 |
| 1746234815 | 1979 | 1979 | The Warriors              | The Warriors              | Hill, Walter                  | Walter Hill            | tt0080120 |
| 1746574686 | 1934 | 1934 | Carolina                  | Carolina                  | King, Henry                   | Henry King             | tt0024956 |
| 1746419624 | 1988 | 1987 | World Gone Wild           | World Gone Wild           | Katzin, Lee H.                | Lee H. Katzin          | tt0096465 |
| 1746492051 | 1947 | 1947 | The Devil Thumbs a Ride   | The Devil Thumbs a Ride   | Feist, Felix                  | Felix E. Feist         | tt0039317 |
| 1746465272 | 1947 | 1947 | That's My Gal             | That's My Gal             | Blair, George                 | George Blair           | tt0039894 |
| 1746571708 | 1932 | 1932 | Union Depot               | Union Depot               | Green, Alfred E.              | Alfred E. Green        | tt0023642 |
| 1745302687 | 2005 | 2005 | Hide and Seek             | Hide and Seek             | Polson, John                  | John Polson            | tt0382077 |
| 1746580453 | 1937 | 1937 | Where Trails Divide       | Where Trails Divide       | Bradbury, Robert N.           | Robert N. Bradbury     | tt0029766 |
| 1746210488 | 1970 | 1969 | Wild, Free and Hungry     | Wild, Free & Hungry       | Edwards, H. P.                | Paul Hunt              | tt0134215 |
| 1746514673 | 1914 | 1913 | A Lady of Quality         | A Lady of Quality         |                               | J. Searle Dawley       | tt0003048 |
| 1745374746 | 2010 | 2010 | The Town                  | The Town                  | Affleck, Ben                  | Ben Affleck            | tt0840361 |
| 1746216740 | 1969 | 1969 | Like Mother Like Daughter | Like Mother Like Daughter | O'Neil, Robert V.             | Robert Vincent O'Neill | tt0151338 |
| 1746532817 | 1923 | 1923 | Racing Hearts             | Racing Hearts             | Powell, Paul                  | Paul Powell            | tt0014389 |
| 1746520898 | 1950 | 1949 | Dear Wife                 | Dear Wife                 | Haydn, Richard                | Richard Haydn          | tt0041286 |
| 1746486844 | 1919 | 1919 | Widow by Proxy            | Widow by Proxy            | Edward, Walter                | Walter Edwards         | tt0010891 |
| 1746465372 | 1944 | 1944 | The Missing Juror         | The Missing Juror         | Boetticher, Oscar             | Budd Boetticher        | tt0037078 |
| 1746500075 | 1924 | 1924 | The Bedroom Window        | The Bedroom Window        | de Mille, William             | William C. deMille     | tt0014706 |
| 1745340774 | 2003 | 2003 | Marci X                   | Marci X                   | Benjamin, Richard             | Richard Benjamin       | tt0266747 |
| 1746583103 | 1935 | 1935 | The Littlest Rebel        | The Littlest Rebel        | Butler, David                 | David Butler           | tt0026641 |
| 1746562221 | 1953 | 1953 | Jennifer                  | Jennifer                  | Newton, Joel; Girard, Bernard | Joel Newton            | tt0045931 |
| 1746507870 | 1924 | 1924 | The House of Youth        | The House of Youth        | Ince, Ralph                   | Ralph Ince             | tt0135459 |
| 1746566212 | 1958 | 1958 | Machine-Gun Kelly         | Machine Gun Kelly         | Corman, Roger                 | Roger Corman           | tt0051887 |
| 1746210712 | 1971 | 1971 | Evel Knievel              | Evel Knievel              | Chomsky, Marvin               | Marvin J. Chomsky      | tt0067069 |
| 1746574602 | 1933 | 1933 | Life in the Raw           | Life in the Raw           | King, Louis                   | Louis King             | tt0024256 |
| 1746583796 | 1929 | 1929 | The Battle of Paris       | Battle of Paris           | Florey, Robert                | Robert Florey          | tt0019679 |
| 1746514488 | 1923 | 1923 | Riders of the Range       | Riders of the Range       | Thayer, Otis B.               | Otis Thayer            | tt0156021 |
| 1746585162 | 1928 | 1928 | Across the Atlantic       | Across the Atlantic       | Bretherton, Howard            | Howard Bretherton      | tt0018616 |
| 1746570985 | 1934 | 1934 | Cleopatra                 | Cleopatra                 | DeMille, Cecil B.             | Cecil B. DeMille       | tt0024991 |
| 1746520891 | 1949 | 1949 | Daughter of the Jungle    | Daughter of the Jungle    | Blair, George                 | George Blair           | tt0041281 |
| 1746585351 | 1929 | 1929 | Laughing at Death         | Laughing at Death         | Fox, Wallace W.               | Wallace Fox            | tt0020083 |
| 1746422276 | 1999 | 1999 | Man on the Moon           | Man on the Moon           | Forman, Milos                 | Milos Forman           | tt0125664 |
| 1745359781 | 2008 | 2008 | Righteous Kill            | Righteous Kill            | Avnet, Jon                    | Jon Avnet              | tt1034331 |
| 1746582472 | 1935 | 1935 | Private Worlds            | Private Worlds            | La Cava, Gregory              | Gregory La Cava        | tt0026893 |
| 1746585459 | 1940 | 1940 | Down Argentine Way        | Down Argentine Way        | Cummings, Irving              | Irving Cummings        | tt0032410 |
| 1746564528 | 1951 | 1951 | The Last Outpost          | The Last Outpost          | Foster, Lewis R.              | Lewis R. Foster        | tt0043725 |
| 1746582754 | 1939 | 1939 | Let Us Live               | Let Us Live               | Brahm, John                   | John Brahm             | tt0031566 |
| 1746498491 | 1918 | 1918 | Hobbs in a Hurry          | Hobbs in a Hurry          | King, Henry                   | Henry King             | tt0010260 |
| 1746585091 | 1930 | 1930 | Anybody's Woman           | Anybody's Woman           | Arzner, Dorothy               | Dorothy Arzner         | tt0020645 |
| 1746423853 | 1940 | 1940 | Pop Always Pays           | Pop Always Pays           | Goodwins, Leslie              | Leslie Goodwins        | tt0032925 |
| 1746583558 | 1930 | 1930 | Just Imagine              | Just Imagine              | Butler, David                 | David Butler           | tt0021016 |
| 1746504557 | 1918 | 1918 | A Soul in Trust           | A Soul in Trust           | Hamilton, G. P.               | Gilbert P. Hamilton    | tt0009636 |
| 1746577377 | 1960 | 1960 | Under Ten Flags           | Under Ten Flags           | Coletti, Duilio               | Duilio Coletti         | tt0054328 |

|            |      |      |                               |                               |                                   |                      |           |
|------------|------|------|-------------------------------|-------------------------------|-----------------------------------|----------------------|-----------|
| 1746496996 | 1921 | 1921 | The Inside of the Cup         | The Inside of the Cup         | Capellani, Albert                 | Albert Capellani     | tt0012318 |
| 1746186170 | 1968 | 1968 | Come Back Baby                | Come Back Baby                | Greene, David Allen               | David Allen Greene   | tt0181394 |
| 1769971937 | 1969 | 1969 | Her Odd Tastes                | Her Odd Tastes                |                                   | Donald A. Davis      | tt0140144 |
| 1746419166 | 1994 | 1994 | Trapped in Paradise           | Trapped in Paradise           | Gallo, George                     | George Gallo         | tt0111477 |
| 1746580407 | 1935 | 1935 | Born to Gamble                | Born to Gamble                | Rosen, Phil                       | Phil Rosen           | tt0026131 |
| 1745359797 | 2004 | 2003 | Greendale                     | Greendale                     | Shakey, Bernard                   | Neil Young           | tt0379307 |
| 1746504365 | 1920 | 1920 | Romance                       | Romance                       | Withey, Chet                      | Chester Withey       | tt0011639 |
| 1746394439 | 1986 | 1986 | Playing for Keeps             | Playing for Keeps             | Weinstein, Bob; Weinstein, Harvey | Bob Weinstein        | tt0091767 |
| 1746512876 | 1916 | 1916 | Bluff                         | Bluff                         | Berger, Rea                       | Rae Berger           | tt0157416 |
| 1746454927 | 1946 | 1946 | Tumbleweed Trail              | Tumbleweed Trail              | Tansey, Robert Emmett             | Robert Emmett Tansey | tt0039052 |
| 1746509506 | 1924 | 1924 | Galloping Gallagher           | Galloping Gallagher           | Rogell, Albert                    | Albert S. Rogell     | tt0128228 |
| 1746569811 | 1957 | 1957 | The Wings of Eagles           | The Wings of Eagles           | Ford, John                        | John Ford            | tt0051198 |
| 1746585189 | 1929 | 1929 | Blue Skies                    | Blue Skies                    | Werker, Alfred L.                 | Alfred L. Werker     | tt0019705 |
| 1746454284 | 1943 | 1943 | The Mystery of the 13th Guest | The Mystery of the 13th Guest | Beaudine, William                 | William Beaudine     | tt0036189 |
| 1746553683 | 1964 | 1964 | The Americanization of Emily  | The Americanization of Emily  | Hiller, Arthur                    | Arthur Hiller        | tt0057840 |
| 1746583250 | 1931 | 1931 | The Hurricane Horseman        | Hurricane Horseman            | Schaeffer, Armand                 | Armand Schaefer      | tt0021982 |
| 1746508964 | 1926 | 1926 | The Golden Web                | The Golden Web                | Lang, Walter                      | Walter Lang          | tt0016929 |
| 1746507748 | 1949 | 1949 | Look for the Silver Lining    | Look for the Silver Lining    | Butler, David                     | David Butler         | tt0041599 |
| 1746408920 | 1986 | 1986 | Legal Eagles                  | Legal Eagles                  | Reitman, Ivan                     | Ivan Reitman         | tt0091396 |
| 1746496573 | 1918 | 1918 | Denny from Ireland            | Denny from Ireland            | Clifford, W. H.                   | William H. Clifford  | tt0161491 |
| 1746208663 | 1966 | 1966 | My Brother's Wife             | My Brother's Wife             | Wishman, Doris                    | Doris Wishman        | tt0138636 |
| 1746582642 | 1938 | 1938 | Code of the Rangers           | Code of the Rangers           | Newfield, Sam                     | Sam Newfield         | tt0030001 |
| 1746574538 | 1934 | 1934 | Are We Civilized?             | Are We Civilized?             |                                   | Edwin Carewe         | tt0024834 |
| 1746201190 | 1970 | 1970 | Darling Lili                  | Darling Lili                  | Edwards, Blake                    | Blake Edwards        | tt0065611 |
| 1746394505 | 1984 | 1984 | Tank                          | Tank                          | Chomsky, Marvin J.                | Marvin J. Chomsky    | tt0088224 |
| 1745302738 | 2007 | 2007 | Bratz                         | Bratz                         | McNamara, Sean                    | Sean McNamara        | tt0804452 |
| 1746408858 | 1986 | 1986 | Just Between Friends          | Just Between Friends          | Burns, Allan                      | Allan Burns          | tt0091310 |
| 1746232972 | 1966 | 1966 | Made in Paris                 | Made in Paris                 | Sagal, Boris                      | Boris Sagal          | tt0060646 |
| 1746574991 | 1935 | 1935 | Suicide Squad                 | Suicide Squad                 | Johnson, Raymond K.               | Bernard B. Ray       | tt0027057 |
| 1746454150 | 1995 | 1995 | Nixon                         | Nixon                         | Stone, Oliver                     | Oliver Stone         | tt0113987 |
| 1746465239 | 1947 | 1947 | The Hucksters                 | The Hucksters                 | Conway, Jack                      | Jack Conway          | tt0039477 |
| 1746503765 | 1921 | 1921 | Hearts o' the Range           | Hearts o' the Range           | Morante, Milburn                  | Milburn Morante      | tt0134711 |
| 1745294009 | 2007 | 2007 | Why Did I Get Married?        | Why Did I Get Married?        | Perry, Tyler                      | Tyler Perry          | tt0906108 |
| 1769970538 | 1966 | 1966 | Suburbia Confidential         | Suburbia Confidential         |                                   | Stephen C. Apostolof | tt0128640 |
| 1745340794 | 2002 | 2002 | Juwanna Mann                  | Juwanna Mann                  | Vaughan, Jesse                    | Jesse Vaughan        | tt0247444 |
| 1745342520 | 2010 | 2009 | Middle Men                    | Middle Men                    | Gallo, George                     | George Gallo         | tt1251757 |
| 1745282679 | 2007 | 2006 | First Snow                    | First Snow                    | Fergus, Mark                      | Mark Fergus          | tt0432289 |
| 1745293443 | 2007 | 2007 | Halloween                     | Halloween                     | Zombie, Rob                       | Rob Zombie           | tt0373883 |
| 1746584968 | 1940 | 1940 | Son of Ingagi                 | Son of Ingagi                 | Kahn, Richard C.                  | Richard C. Kahn      | tt0033075 |
| 1746198502 | 1968 | 1968 | Buckskin                      | Buckskin                      | Moore, Michael                    | Michael D. Moore     | tt0062764 |
| 1746508671 | 1949 | 1949 | The Girl from Jones Beach     | The Girl from Jones Beach     | Godfrey, Peter                    | Peter Godfrey        | tt0041415 |
| 1746580338 | 1938 | 1938 | Boy Meets Girl                | Boy Meets Girl                | Bacon, Lloyd                      | Lloyd Bacon          | tt0029940 |
| 1746465258 | 1943 | 1943 | Something to Shout About      | Something to Shout About      | Ratoff, Gregory                   | Gregory Ratoff       | tt0036375 |
| 1746491711 | 1948 | 1948 | April Showers                 | April Showers                 | Kern, James V.                    | James V. Kern        | tt0040107 |
| 1746520322 | 1926 | 1925 | The Ace of Clubs              | Ace of Clubs                  | McGowan, J. P.                    | J.P. McGowan         | tt0016573 |
| 1746508110 | 1927 | 1927 | Perch of the Devil            | Perch of the Devil            | Baggot, King                      | King Baggot          | tt0018256 |
| 1745302333 | 2005 | 2005 | Little Manhattan              | Little Manhattan              | Levin, Mark                       | Mark Levin           | tt0412922 |
| 1746572246 | 1931 | 1931 | Up for Murder                 | Up for Murder                 | Bell, Monta                       | Monta Bell           | tt0021868 |
| 1746583083 | 1939 | 1939 | Undercover Agent              | Undercover Agent              | Bretherton, Howard                | Howard Bretherton    | tt0032076 |
| 1746455613 | 1998 | 1998 | Bulworth                      | Bulworth                      | Beatty, Warren                    | Warren Beatty        | tt0118798 |
| 1746554082 | 1964 | 1964 | Surf Party                    | Surf Party                    | Dexter, Maury                     | Maury Dexter         | tt0058626 |
| 1746512656 | 1915 | 1915 | The Flying Twins              | The Flying Twins              |                                   | Jack Harvey          | tt0005335 |
| 1746571292 | 1933 | 1933 | Mr. Broadway                  | Mr. Broadway                  | Walker, Johnnie                   | Johnnie Walker       | tt0024356 |
| 1746513098 | 1927 | 1927 | Home Struck                   | Home Struck                   | Ince, Ralph                       | Ralph Ince           | tt0135450 |
| 1746394230 | 1983 | 1983 | The Being                     | The Being                     | Kong, Jackie                      | Jackie Kong          | tt0085224 |
| 1746217068 | 1965 | 1965 | A Patch of Blue               | A Patch of Blue               | Green, Guy                        | Guy Green            | tt0059573 |
| 1746555581 | 1956 | 1956 | Toward the Unknown            | Toward the Unknown            | LeRoy, Mervyn                     | Mervyn LeRoy         | tt0049870 |

|            |      |      |                               |                               |                                |                      |           |
|------------|------|------|-------------------------------|-------------------------------|--------------------------------|----------------------|-----------|
| 1746393685 | 1982 | 1982 | Silent Rage                   | Silent Rage                   | Miller, Michael                | Michael Miller       | tt0084684 |
| 1746501167 | 1910 | 1910 | A Touching Affair             | A Touching Affair             | Morris, Sam                    | Sam Morris           | tt1570533 |
| 1769970450 | 1965 | 1965 | Flesh and Lace                | Flesh and Lace                | Sarno, Joe                     | Joseph W. Sarno      | tt0058102 |
| 1746514199 | 1910 | 1910 | Love in Quarantine            | Love in Quarantine            | Powell, Frank                  | Frank Powell         | tt0362828 |
| 1746567554 | 1952 | 1951 | Westward the Women            | Westward the Women            | Wellman, William A.            | William A. Wellman   | tt0044205 |
| 1746493501 | 1910 | 1910 | Sisters                       | Sisters                       |                                | Bannister Merwin     | tt0001397 |
| 1746465376 | 1947 | 1947 | It's a Joke, Son!             | It's a Joke, Son!             | Stoloff, Ben                   | Benjamin Stoloff     | tt0039503 |
| 1746585084 | 1929 | 1929 | Night Club                    | Night Club                    | Florey, Robert                 | Robert Florey        | tt0019210 |
| 1746493366 | 1910 | 1910 | The Usurper                   | The Usurer                    |                                | D.W. Griffith        | tt0001439 |
| 1746524467 | 1916 | 1916 | The Net                       | The Net                       | Platt, George Foster           | George Foster Platt  | tt0007120 |
| 1746183365 | 1910 | 1910 | The Call to Arms              | The Call to Arms              | Griffith, D. W.                | D.W. Griffith        | tt0001143 |
| 1746567758 | 1933 | 1933 | Scandal                       | Scandal                       |                                | Jack Goldberg        | tt0135643 |
| 1746583600 | 1929 | 1929 | The Mighty                    | The Mighty                    | Cromwell, John                 | John Cromwell        | tt0022147 |
| 1746577354 | 1960 | 1960 | All the Fine Young Cannibals  | All the Fine Young Cannibals  | Anderson, Michael              | Michael Anderson     | tt0053582 |
| 1746574449 | 1961 | 1961 | The Right Approach            | The Right Approach            | Butler, David                  | David Butler         | tt0055373 |
| 1746561391 | 1932 | 1932 | Amateur Daddy                 | Amateur Daddy                 | Blystone, John                 | John G. Blystone     | tt0022625 |
| 1745302994 | 2006 | 2005 | Hard Candy                    | Hard Candy                    | Slade, David                   | David Slade          | tt0424136 |
| 1746570371 | 1952 | 1952 | The Atomic City               | The Atomic City               | Hopper, Jerry                  | Jerry Hopper         | tt0044382 |
| 1746500649 | 1949 | 1950 | The Blonde Bandit             | The Blonde Bandit             | Keller, Harry                  | Harry Keller         | tt0042261 |
| 1746410372 | 1982 | 1982 | Eating Raoul                  | Eating Raoul                  | Bartel, Paul                   | Paul Bartel          | tt0083869 |
| 1745293145 | 2007 | 2007 | The Girl Next Door            | The Girl Next Door            | Wilson, Gregory M.             | Gregory Wilson       | tt0830558 |
| 1746581490 | 1928 | 1928 | 13 Washington Square          | 13 Washington Square          | Brown, Melville W.             | Melville W. Brown    | tt0018611 |
| 1745358085 | 2004 | 2004 | Spider-Man 2                  | Spider Man 2                  | Raimi, Sam                     | Sam Raimi            | tt0316654 |
| 1746576191 | 1932 | 1932 | Whistlin' Dan                 | Whistlin' Dan                 | Rosen, Phil                    | Phil Rosen           | tt0023692 |
| 1746562129 | 1953 | 1953 | Girls in the Night            | Girls in the Night            | Arnold, Jack                   | Jack Arnold          | tt0045818 |
| 1746497078 | 1918 | 1918 | His Robe of Honor             | His Robe of Honor             | Ingram, Rex                    | Rex Ingram           | tt0009184 |
| 1746568147 | 1933 | 1933 | Chance at Heaven              | Chance at Heaven              | Seiter, William                | William A. Seiter    | tt0023880 |
| 1746410438 | 1986 | 1986 | Children of a Lesser God      | Children of a Lesser God      | Haines, Randa                  | Randa Haines         | tt0090830 |
| 1746454494 | 1942 | 1942 | Strictly in the Groove        | Strictly in the Groove        | Keays, Vernon                  | Vernon Keays         | tt0035389 |
| 1746464919 | 1944 | 1944 | Music in Manhattan            | Music in Manhattan            | Auer, John H.                  | John H. Auer         | tt0037105 |
| 1746514688 | 1915 | 1915 | The Dictator                  | The Dictator                  | Eagle, Oscar                   | Oscar Eagle          | tt0005196 |
| 1746410460 | 1986 | 1986 | American Anthem               | American Anthem               | Magnoli, Albert                | Albert Magnoli       | tt0090631 |
| 1746530740 | 1949 | 1949 | Pinky                         | Pinky                         | Kazan, Elia                    | Elia Kazan           | tt0041746 |
| 1746423009 | 2000 | 2000 | Dracula 2000                  | Dracula 2000                  | Lussier, Patrick               | Patrick Lussier      | tt0219653 |
| 1746409092 | 1992 | 1992 | Of Mice and Men               | Of Mice and Men               | Sinise, Gary                   | Gary Sinise          | tt0105046 |
| 1746565919 | 1955 | 1955 | Ten Wanted Men                | Ten Wanted Men                | Humberstone, Bruce             | H. Bruce Humberstone | tt0048703 |
| 1746584725 | 1929 | 1929 | The Awful Truth               | The Awful Truth               | Neilan, Marshall               | Marshall Neilan      | tt0019666 |
| 1746553385 | 1964 | 1964 | Roustabout                    | Roustabout                    | Rich, John                     | John Rich            | tt0058534 |
| 1746523560 | 1916 | 1916 | The Secret of the Swamp       | The Secret of the Swamp       | Reynolds, Lynn                 | Lynn Reynolds        | tt0007318 |
| 1746577258 | 1951 | 1951 | Wanted Dead or Alive          | Wanted: Dead or Alive         | Carr, Thomas                   | Thomas Carr          | tt0162760 |
| 1746502388 | 1915 | 1915 | The Vow                       | The Vow                       | Taylor, S. E. V.               | Stanner E.V. Taylor  | tt0006235 |
| 1746235220 | 1980 | 1980 | Flash Gordon                  | Flash Gordon                  | Hodges, Mike                   | Mike Hodges          | tt0080745 |
| 1746566338 | 1954 | 1954 | The Law vs. Billy the Kid     | The Law vs. Billy the Kid     | Castle, William                | William Castle       | tt0047163 |
| 1769969544 | 1965 | 1965 | The Sexploiters               | The Sexploiters               | Ruban, Al C.                   | Al Ruban             | tt0148746 |
| 1746574205 | 1959 | 1959 | Battle Flame                  | Battle Flame                  | Springsteen, R. G.             | R.G. Springsteen     | tt0052605 |
| 1746581233 | 1960 | 1960 | Seven Ways from Sundown       | Seven Ways from Sundown       | Keller, Harry; Sherman, George | Harry Keller         | tt0054296 |
| 1746409103 | 1984 | 1984 | Bachelor Party                | Bachelor Party                | Israel, Neal                   | Neal Israel          | tt0086927 |
| 1746453540 | 1944 | 1944 | The Uninvited                 | The Uninvited                 | Allen, Lewis                   | Lewis Allen          | tt0037415 |
| 1746520253 | 1926 | 1926 | The Great K & A Train Robbery | The Great K & A Train Robbery | Seiler, Lewis                  | Lewis Seiler         | tt0016939 |
| 1746393329 | 1984 | 1984 | Choose Me                     | Choose Me                     | Rudolph, Alan                  | Alan Rudolph         | tt0087054 |
| 1745373162 | 2004 | 2004 | The Village                   | The Village                   | Shyamalan, M. Night            | M. Night Shyamalan   | tt0368447 |
| 1746561335 | 1956 | 1956 | Dance with Me, Henry          | Dance with Me, Henry          | Barton, Charles                | Charles Barton       | tt0049120 |
| 1746513838 | 1917 | 1917 | Beware of Strangers           | Beware of Strangers           | Campbell, Colin                | Colin Campbell       | tt0008883 |
| 1746421960 | 1997 | 1997 | Latin Boys Go to Hell         | Latin Boys Go to Hell         | Troyano, Ela                   | Ela Troyano          | tt0124777 |
| 1746465120 | 1944 | 1944 | Heavenly Days                 | Heavenly Days                 | Estabrook, Howard              | Howard Estabrook     | tt0036902 |
| 1746410896 | 1991 | 1991 | Nothing But Trouble           | Nothing But Trouble           | Aykroyd, Dan                   | Dan Aykroyd          | tt0102558 |
| 1746563795 | 1951 | 1951 | The Mark of the Renegade      | The Mark of the Renegade      | Fregonese, Hugo                | Hugo Fregonese       | tt0043787 |

|            |      |      |                                     |                                     |                                    |                       |           |
|------------|------|------|-------------------------------------|-------------------------------------|------------------------------------|-----------------------|-----------|
| 1746436071 | 1941 | 1941 | Golden Hoofs                        | Golden Hoofs                        | Shores, Lynn                       | Lynn Shores           | tt0033670 |
| 1746219377 | 1972 | 1972 | Elvis on Tour                       | Elvis on Tour                       | Adidge, Pierre; Abel, Robert       | Robert Abel           | tt0068537 |
| 1746524570 | 1915 | 1915 | The Rosary                          | The Rosary                          | Campbell, Colin                    | Colin Campbell        | tt0005979 |
| 1746520342 | 1926 | 1926 | Monte Carlo                         | Monte Carlo                         | Cabanne, Christy                   | Christy Cabanne       | tt0017166 |
| 1746582529 | 1938 | 1938 | Men Are Such Fools                  | Men Are Such Fools                  | Berkeley, Busby                    | Busby Berkeley        | tt0030433 |
| 1746454886 | 1999 | 1999 | Girl, Interrupted                   | Girl, Interrupted                   | Mangold, James                     | James Mangold         | tt0172493 |
| 1746486482 | 1919 | 1919 | The Sheriff's Son                   | The Sheriff's Son                   | Schertzinger, Victor L.            | Victor Schertzinger   | tt0010691 |
| 1745340964 | 2001 | 2001 | Porn Star: The Legend of Ron Jeremy | Porn Star: The Legend of Ron Jeremy | Gill, Scott J.                     | Scott J. Gill         | tt0282856 |
| 1746525194 | 1921 | 1921 | Shams of Society                    | Shams of Society                    | Walsh, Thomas B.                   | Thomas B. Walsh       | tt0012673 |
| 1746581633 | 1929 | 1929 | Clear the Decks                     | Clear the Decks                     | Henabery, Joseph E.                | Joseph Henabery       | tt0019773 |
| 1746503313 | 1918 | 1918 | Everywoman's Husband                | Everywoman's Husband                | Hamilton, Gilbert P.               | Gilbert P. Hamilton   | tt0009042 |
| 1746583268 | 1951 | 1950 | Revenue Agent                       | Revenue Agent                       | Landers, Lew                       | Lew Landers           | tt0042887 |
| 1746393272 | 1987 | 1987 | The Secret of My Success            | The Secret of My Success            | Ross, Herbert                      | Herbert Ross          | tt0093936 |
| 1746209441 | 1966 | 1966 | A Man Called Adam                   | A Man Called Adam                   | Penn, Leo                          | Leo Penn              | tt0060660 |
| 1745339943 | 2002 | 2002 | Reign of Fire                       | Reign of Fire                       | Bowman, Rob                        | Rob Bowman            | tt0253556 |
| 1746566264 | 1956 | 1956 | Red Sundown                         | Red Sundown                         | Arnold, Jack                       | Jack Arnold           | tt0049667 |
| 1746585061 | 1929 | 1929 | The Younger Generation              | The Younger Generation              | Capra, Frank R.                    | Frank Capra           | tt0020613 |
| 1746509316 | 1924 | 1924 | A Desperate Adventure               | A Desperate Adventure               | McGowan, J. P.                     | J.P. McGowan          | tt0014845 |
| 1746464996 | 1947 | 1947 | Six-Gun Serenade                    | Six Gun Serenade                    | Beebe, Ford                        | Ford Beebe            | tt0163244 |
| 1746421607 | 1989 | 1989 | Police Academy 6: City Under Siege  | Police Academy 6: City Under Siege  | Bonerz, Peter                      | Peter Bonerz          | tt0098105 |
| 1746582188 | 1951 | 1951 | The Lady from Texas                 | The Lady from Texas                 | Pevney, Joseph                     | Joseph Pevney         | tt0043723 |
| 1746569972 | 1957 | 1957 | Mister Cory                         | Mister Cory                         | Edwards, Blake                     | Blake Edwards         | tt0050710 |
| 1746465385 | 1945 | 1945 | The Woman in Green                  | The Woman in Green                  | Neill, Roy William                 | Roy William Neill     | tt0038259 |
| 1746492707 | 1948 | 1947 | Design for Death                    | Design for Death                    |                                    |                       | tt0040285 |
| 1745309716 | 2006 | 2006 | Waist Deep                          | Waist Deep                          | Hall, Vondie Curtis                | Vondie Curtis         | tt0456020 |
| 1746524617 | 1927 | 1927 | Broadway After Midnight             | Broadway After Midnight             | Windermere, Fred                   | Fred Windemere        | tt0017700 |
| 1746500040 | 1948 | 1948 | Close-Up                            | Close Up                            | Donohue, Jack                      | Jack Donohue          | tt0040237 |
| 1746525046 | 1920 | 1920 | Number 99                           | Number 99                           | Warde, Ernest C.                   | Ernest C. Warde       | tt0196805 |
| 1745360018 | 2001 | 2001 | Haiku Tunnel                        | Haiku Tunnel                        | Kornbluth, Jacob ; Kornbluth, Josh | Jacob Kornbluth       | tt0273253 |
| 1745341262 | 2002 | 2002 | Dahmer                              | Dahmer                              | Jacobson, David                    | David Jacobson        | tt0285728 |
| 1746186299 | 1965 | 1965 | Vinyl                               | Vinyl                               | Warhol, Andy                       | Andy Warhol           | tt0059880 |
| 1746491874 | 1946 | 1946 | Janie Gets Married                  | Janie Gets Married                  | Sherman, Vincent                   | Vincent Sherman       | tt0038652 |
| 1746218898 | 1972 | 1972 | Lenny Bruce Without Tears           | Lenny Bruce Without Tears           | Baker, Fred                        | Fred Baker            | tt0151327 |
| 1746475768 | 1944 | 1944 | When Strangers Marry                | When Strangers Marry                | Castle, William                    | William Castle        | tt0037458 |
| 1745342055 | 2002 | 2002 | The Salton Sea                      | The Salton Sea                      | Caruso, D. J.                      | D.J. Caruso           | tt0235737 |
| 1746581515 | 1928 | 1928 | Speedy                              | Speedy                              | Wilde, Ted                         | Ted Wilde             | tt0019412 |
| 1746571361 | 1933 | 1932 | The Bitter Tea of General Yen       | The Bitter Tea of General Yen       | Capra, Frank R.                    | Frank Capra           | tt0023814 |
| 1769970418 | 1965 | 1965 | Watch the Birdie                    | Watch the Birdie                    | Alti, Giulio                       | Giulio Alti           | tt0260531 |
| 1746584781 | 1930 | 1930 | Rogue of the Rio Grande             | Rogue of the Rio Grande             | Bennett, Spencer Gordon            | Spencer Gordon Bennet | tt0021308 |
| 1746408665 | 1987 | 1987 | Overboard                           | Overboard                           | Marshall, Garry                    | Garry Marshall        | tt0093693 |
| 1746454934 | 1941 | 1941 | Blues in the Night                  | Blues in the Night                  | Litvak, Anatole                    | Anatole Litvak        | tt0033409 |
| 1746580757 | 1935 | 1935 | The Raven                           | The Raven                           | Friedlander, Louis                 | Lew Landers           | tt0026912 |
| 1746570970 | 1934 | 1934 | The Man from Hell                   | The Man from Hell                   | Collins, Lew                       | Lewis D. Collins      | tt0025454 |
| 1746578448 | 1959 | 1959 | Speed Crazy                         | Speed Crazy                         | Hole, William                      | William J. Hole Jr.   | tt0053300 |
| 1746513622 | 1927 | 1927 | The Final Extra                     | The Final Extra                     | Hogan, James P.                    | James P. Hogan        | tt0017882 |
| 1746581363 | 1950 | 1950 | Outcast of Black Mesa               | Outcasts of Black Mesa              | Nazarro, Ray                       | Ray Nazarro           | tt0042821 |
| 1746574557 | 1935 | 1935 | Hong Kong Nights                    | Hong Kong Nights                    | Hopper, E. Mason                   | E. Mason Hopper       | tt0026489 |
| 1746436680 | 1941 | 1941 | Singapore Woman                     | Singapore Woman                     | Negulesco, Jean                    | Jean Negulesco        | tt0034191 |
| 1746580309 | 1939 | 1939 | The Great Victor Herbert            | The Great Victor Herbert            | Stone, Andrew L.                   | Andrew L. Stone       | tt0031393 |
| 1746219545 | 1974 | 1974 | Golden Needles                      | Golden Needles                      | Clouse, Robert                     | Robert Clouse         | tt0071568 |
| 1746497474 | 1920 | 1920 | Young Mrs. Winthrop                 | Young Mrs. Winthrop                 | Edwards, Walter                    | Walter Edwards        | tt0011892 |
| 1746209091 | 1968 | 1968 | Girl in Gold Boots                  | Girl in Gold Boots                  | Mikels, Ted V.                     | Ted V. Mikels         | tt0174685 |
| 1746488043 | 1917 | 1917 | On Trial                            | On Trial                            | Young, James                       | James Young           | tt0008383 |
| 1746580898 | 1937 | 1937 | Youth on Parole                     | Youth on Parole                     | Rosen, Phil                        | Phil Rosen            | tt0029812 |
| 1746435320 | 1998 | 1998 | Hush                                | Hush                                | Darby, Jonathan                    | Jonathan Darby        | tt0118744 |
| 1746569869 | 1955 | 1955 | Women's Prison                      | Women's Prison                      | Seiler, Lewis                      | Lewis Seiler          | tt0048811 |
| 1746577118 | 1959 | 1959 | The Giant Gila Monster              | The Giant Gila Monster              | Kellogg, Ray                       | Ray Kellogg           | tt0052846 |



|            |      |      |                              |                              |                      |                   |           |
|------------|------|------|------------------------------|------------------------------|----------------------|-------------------|-----------|
| 1746424375 | 1940 | 1940 | Glamour for Sale             | Glamour for Sale             | Lederman, D. Ross    | D. Ross Lederman  | tt0032534 |
| 1746435028 | 1998 | 1998 | The Impostors                | The Impostors                | Tucci, Stanley       | Stanley Tucci     | tt0120823 |
| 1746520682 | 1925 | 1925 | Thundering Through           | Thundering Through           | Bain, Fred           | Fred Bain         | tt0016431 |
| 1746566828 | 1952 | 1952 | The San Francisco Story      | The San Francisco Story      | Parrish, Robert      | Robert Parrish    | tt0045119 |
| 1746235286 | 1976 | 1976 | Family Plot                  | Family Plot                  | Hitchcock, Alfred    | Alfred Hitchcock  | tt0074512 |
| 1746570005 | 1958 | 1958 | The Mugger                   | The Mugger                   | Berke, William       | William Berke     | tt0151666 |
| 1745272520 | 2000 | 2000 | Scream 3                     | Scream 3                     | Craven, Wes          | Wes Craven        | tt0134084 |
| 1745309446 | 2006 | 2006 | Hoot                         | Hoot                         | Shriner, Wil         | Wil Shriner       | tt0453494 |
| 1746577747 | 1937 | 1937 | Partners in Crime            | Partners in Crime            | Murphy, Ralph        | Ralph Murphy      | tt0029380 |
| 1746464894 | 1945 | 1945 | Enemy of the Law             | Enemy of the Law             | Fraser, Harry        | Harry L. Fraser   | tt0037673 |
| 1746569903 | 1954 | 1954 | The Glenn Miller Story       | The Glenn Miller Story       | Mann, Anthony        | Anthony Mann      | tt0047030 |
| 1746577912 | 1936 | 1936 | The Walking Dead             | The Walking Dead             | Curtiz, Michael      | Michael Curtiz    | tt0028478 |
| 1746583498 | 1929 | 1929 | The Talk of Hollywood        | The Talk of Hollywood        | Sandrich, Mark       | Mark Sandrich     | tt0021449 |
| 1746520848 | 1949 | 1949 | In the Good Old Summertime   | In the Good Old Summertime   | Leonard, Robert Z.   | Robert Z. Leonard | tt0041507 |
| 1746578611 | 1951 | 1951 | Montana Desperado            | Montana Desperado            | Fox, Wallace W.      | Wallace Fox       | tt0043817 |
| 1745302344 | 2006 | 2006 | The Pursuit of Happyness     | The Pursuit of Happyness     | Muccino, Gabriele    | Gabriele Muccino  | tt0454921 |
| 1746583286 | 1930 | 1930 | The Case of Sergeant Grischa | The Case of Sergeant Grischa | Brenon, Herbert      | Herbert Brenon    | tt0020744 |
| 1746525177 | 1919 | 1919 | More Deadly Than the Male    | More Deadly Than the Male    | Vignola, Robert G.   | Robert G. Vignola | tt0010483 |
| 1746583055 | 1935 | 1935 | Fighting Pioneers            | Fighting Pioneers            | Fraser, Harry        | Harry L. Fraser   | tt0026354 |
| 1746507733 | 1925 | 1925 | Ridin' Comet                 | The Riding Comet             | Wilson, Ben          | Ben F. Wilson     | tt0125999 |
| 1746394649 | 1984 | 1984 | The Muppets Take Manhattan   | The Muppets Take Manhattan   | Oz, Frank            | Frank Oz          | tt0087755 |
| 1746498488 | 1919 | 1919 | That's Good                  | That's Good                  | Franklin, Harry L.   | Harry L. Franklin | tt0194443 |
| 1746574273 | 1961 | 1961 | After Mein Kampf             | After Mein Kampf             | Porter, Ralph        | Ralph Porter      | tt0054606 |
| 1746524513 | 1913 | 1913 | Sapho                        | Sapho                        | Henderson, Lucius J. | Lucius Henderson  | tt0003351 |
| 1745374147 | 2004 | 2004 | Ella Enchanted               | Ella Enchanted               | O'Haver, Tommy       | Tommy O'Haver     | tt0327679 |
| 1746580587 | 1938 | 1938 | Under Western Stars          | Under Western Stars          | Kane, Joe            | Joseph Kane       | tt0030910 |
| 1746465269 | 1942 | 1942 | Not a Ladies' Man            | Not a Ladies' Man            | Landers, Lew         | Lew Landers       | tt0035137 |
| 1745359834 | 2010 | 2010 | Step Up 3D                   | Step Up 3D                   | Chu, Jon M.          | Jon M. Chu        | tt1193631 |
| 1746574616 | 1936 | 1936 | Mad Holiday                  | Mad Holiday                  | Seitz, George B.     | George B. Seitz   | tt0027923 |
| 1746503257 | 1921 | 1921 | The Call of the North        | The Call of the North        | Henabery, Joseph     | Joseph Henabery   | tt0012025 |
| 1746570088 | 1934 | 1934 | Fashions of 1934             | Fashions of 1934             | Dieterle, William    | William Dieterle  | tt0025101 |
| 1746584183 | 1936 | 1936 | Anything Goes                | Anything Goes                | Milestone, Lewis     | Lewis Milestone   | tt0027302 |
| 1746580701 | 1938 | 1938 | Penrod and His Twin Brother  | Penrod and His Twin Brother  | McGann, William      | William C. McGann | tt0030571 |
| 1769970401 | 1967 | 1967 | Myra's Bed                   | Myra's Bed                   | Gaston, William      | William Gaston    | tt3624008 |
| 1746408684 | 1992 | 1992 | Scent of a Woman             | Scent of a Woman             | Brest, Martin        | Martin Brest      | tt0105323 |
| 1746508884 | 1923 | 1923 | The Gunfighter               | The Gunfighter               | Reynolds, Lynn F.    | Lynn Reynolds     | tt0014107 |
| 1746533006 | 1915 | 1915 | The Boss                     | The Boss                     | Chautard, Emile      | Emile Chautard    | tt0004992 |
| 1746434929 | 1996 | 1996 | I'm Not Rappaport            | I'm Not Rappaport            | Gardner, Herb        | Herb Gardner      | tt0116601 |
| 1746487592 | 1917 | 1917 | The Hidden Spring            | The Hidden Spring            | Hopper, E. Mason     | E. Mason Hopper   | tt0008091 |
| 1746507832 | 1926 | 1926 | Melodies                     | Melodies                     | Ford, Francis        | Francis Ford      | tt0333904 |
| 1746566159 | 1957 | 1957 | The Seventh Sin              | The Seventh Sin              | Neame, Ronald        | Ronald Neame      | tt0050954 |
| 1746585305 | 1930 | 1930 | The Silent Enemy             | The Silent Enemy             | Carver, H. P.        | H.P. Carver       | tt0020405 |
| 1746487591 | 1918 | 1918 | The Unbeliever               | The Unbeliever               | Crosland, Alan       | Alan Crosland     | tt0009737 |
| 1746555443 | 1955 | 1955 | Not As a Stranger            | Not as a Stranger            | Kramer, Stanley      | Stanley Kramer    | tt0048432 |
| 1746524302 | 1917 | 1917 | Daughter of Maryland         | Daughter of Maryland         | O'Brien, John B.     | John B. O'Brien   | tt0191067 |
| 1746509248 | 1924 | 1924 | Shadows of Paris             | Shadows of Paris             | Brenon, Herbert      | Herbert Brenon    | tt0015320 |
| 1746584918 | 1939 | 1939 | Convict's Code               | Convict's Code               | Hillyer, Lambert     | Lambert Hillyer   | tt0031179 |
| 1746565907 | 1954 | 1954 | The Outlaw's Daughter        | The Outlaw's Daughter        | Barry, Wesley        | Wesley Barry      | tt0047322 |
| 1769970646 | 1968 | 1968 | Too Much Too Often!          | Too Much Too Often!          | Silverman, Louis     | Doris Wishman     | tt0128776 |
| 1745359390 | 2009 | 2009 | Avatar                       | Avatar                       | Cameron, James       | James Cameron     | tt0499549 |
| 1746574519 | 1952 | 1952 | The WAC from Walla Walla     | The WAC from Walla Walla     | Witney, William      | William Witney    | tt0045303 |
| 1746475906 | 1947 | 1947 | Under Colorado Skies         | Under Colorado Skies         | Springsteen, R. G.   | R.G. Springsteen  | tt0039933 |
| 1746473748 | 1944 | 1944 | The Falcon Out West          | The Falcon Out West          | Clemens, William     | William Clemens   | tt0036809 |
| 1746525015 | 1914 | 1914 | A Good Little Devil          | A Good Little Devil          | Porter, Edwin S.     | Edwin S. Porter   | tt0004027 |
| 1746394022 | 1992 | 1992 | Mistress                     | Mistress                     | Primus, Barry        | Barry Primus      | tt0104892 |
| 1746563375 | 1952 | 1952 | Apache War Smoke             | Apache War Smoke             | Kress, Harold        | Harold F. Kress   | tt0044369 |
| 1746582953 | 1936 | 1936 | Sitting on the Moon          | Sitting on the Moon          | Staub, Ralph         | Ralph Staub       | tt0028260 |

|            |      |      |                                   |                                   |                               |                       |           |
|------------|------|------|-----------------------------------|-----------------------------------|-------------------------------|-----------------------|-----------|
| 1746394526 | 1986 | 1986 | Poltergeist II: The Other Side    | Poltergeist II: The Other Side    | Gibson, Brian                 | Brian Gibson          | tt0091778 |
| 1746564768 | 1953 | 1953 | Captain Scarface                  | Captain Scarface                  | Guilfoyle, Paul               | Paul Guilfoyle        | tt0045604 |
| 1746523696 | 1915 | 1915 | A Matrimonial Boomerang           | A Matrimonial Boomerang           | Mix, Tom                      | Tom Mix               | tt0005729 |
| 1746501309 | 1922 | 1922 | Deserted at the Altar             | Deserted at the Altar             | Howard, William K.            | William K. Howard     | tt0013062 |
| 1746581725 | 1910 | 1910 | The Kid                           | The Kid                           | Powell, Frank                 | Frank Powell          | tt0361798 |
| 1746464831 | 1942 | 1942 | Sunset on the Desert              | Sunset on the Desert              | Kane, Joseph                  | Joseph Kane           | tt0035397 |
| 1746464944 | 1945 | 1945 | Captain Tugboat Annie             | Captain Tugboat Annie             | Rosen, Phil                   | Phil Rosen            | tt0037577 |
| 1746453637 | 1941 | 1941 | The Gay Vagabond                  | The Gay Vagabond                  | Morgan, William               | William Morgan        | tt0033652 |
| 1746577370 | 1958 | 1958 | Showdown at Boot Hill             | Showdown at Boot Hill             | Fowler, Gene                  | Gene Fowler Jr.       | tt0052194 |
| 1746218697 | 1972 | 1972 | What's Up, Doc?                   | What's Up, Doc?                   | Bogdanovich, Peter            | Peter Bogdanovich     | tt0069495 |
| 1746514521 | 1916 | 1916 | Man and His Angel                 | Man and His Angel                 | King, Burton                  | Burton L. King        | tt0163088 |
| 1746272379 | 1979 | 1979 | King Frat                         | King Frat                         | Wiederhorn, Ken               | Ken Wiederhorn        | tt0079406 |
| 1746520441 | 1949 | 1949 | Range Land                        | Range Land                        | Hillyer, Lambert              | Lambert Hillyer       | tt0041782 |
| 1746523823 | 1916 | 1916 | The Election Bet                  | The Election Bet                  | Metcalfe, Earl                | Earl Metcalfe         | tt0444044 |
| 1746582916 | 1937 | 1937 | Love and Hises                    | Love and Hises                    | Lanfield, Sidney              | Sidney Lanfield       | tt0029170 |
| 1746492731 | 1944 | 1944 | Week-End Pass                     | Week End Pass                     | Yarbrough, Jean               | Jean Yarbrough        | tt0037452 |
| 1746565903 | 1953 | 1953 | Star of Texas                     | Star of Texas                     | Carr, Thomas                  | Thomas Carr           | tt0046363 |
| 1746248463 | 1966 | 1966 | Johnny Reno                       | Johnny Reno                       | Springsteen, R. G.            | R.G. Springsteen      | tt0060564 |
| 1746581981 | 1929 | 1929 | Spite Marriage                    | Spite Marriage                    | Sedgwick, Edward              | Edward Sedgwick       | tt0020442 |
| 1746487828 | 1919 | 1919 | Turning the Tables                | Turning the Tables                | Clifton, Elmer                | Elmer Clifton         | tt0010808 |
| 1746492560 | 1945 | 1945 | The Cheaters                      | The Cheaters                      | Kane, Joseph                  | Joseph Kane           | tt0037588 |
| 1746566009 | 1955 | 1955 | Yellowneck                        | Yellowneck                        | Hugh, R. John                 | R. John Hugh          | tt0048818 |
| 1746555451 | 1956 | 1956 | Bundle of Joy                     | Bundle of Joy                     | Taurog, Norman                | Norman Taurog         | tt0049034 |
| 1746584191 | 1936 | 1936 | The Dark Hour                     | The Dark Hour                     | Lamont, Charles               | Charles Lamont        | tt0027501 |
| 1746486787 | 1919 | 1919 | The Phantom Honeymoon             | The Phantom Honeymoon             | Dawley, J. Searle             | J. Searle Dawley      | tt0010565 |
| 1746508268 | 1950 | 1949 | Intruder in the Dust              | Intruder in the Dust              | Brown, Clarence               | Clarence Brown        | tt0041513 |
| 1746251481 | 1980 | 1980 | Friday the 13th                   | Friday the 13th                   | Cunningham, Sean S.           | Sean S. Cunningham    | tt0080761 |
| 1746583786 | 1929 | 1929 | Pointed Heels                     | Pointed Heels                     | Sutherland, A. Edward         | A. Edward Sutherland  | tt0020278 |
| 1746500646 | 1925 | 1925 | A Gentleman Roughneck             | Gentleman Roughneck               | Jones, Grover                 | Grover Jones          | tt0015856 |
| 1745358911 | 2002 | 2001 | Monsoon Wedding                   | Monsoon Wedding                   | Nair, Mira                    | Mira Nair             | tt0265343 |
| 1746554999 | 1964 | 1964 | Topkapi                           | Topkapi                           | Dassin, Jules                 | Jules Dassin          | tt0058672 |
| 1746198964 | 1968 | 1968 | The Mini-Skirt Mob                | The Mini Skirt Mob                | Dexter, Maury                 | Maury Dexter          | tt0063306 |
| 1746486185 | 1919 | 1919 | Atonement                         | Atonement                         | Humphrey, William             | William Humphrey      | tt0009891 |
| 1746464940 | 1946 | 1946 | Roaring Rangers                   | Roaring Rangers                   | Nazarro, Ray                  | Ray Nazarro           | tt0038887 |
| 1746524734 | 1915 | 1915 | When We Were Twenty-One           | When We Were Twenty One           | Porter, Edwin S.; Ford, Hugh  | Hugh Ford             | tt0006266 |
| 1746392955 | 1984 | 1984 | Ghostbusters                      | Ghostbusters                      | Reitman, Ivan                 | Ivan Reitman          | tt0087332 |
| 1745282807 | 2007 | 2006 | Be My Oswald                      | Be My Oswald                      | Cato, Don                     | Don Cato              | tt0907620 |
| 1745293202 | 2007 | 2007 | Lions for Lambs                   | Lions for Lambs                   | Redford, Robert               | Robert Redford        | tt0891527 |
| 1746584934 | 1940 | 1940 | Gaucht Serenade                   | Gaucht Serenade                   | McDonald, Frank               | Frank McDonald        | tt0032513 |
| 1746574241 | 1959 | 1958 | Submarine Seahawk                 | Submarine Seahawk                 | Bennet, Spencer G.            | Spencer Gordon Bennet | tt0052256 |
| 1746524118 | 1914 | 1914 | Wolfe; or, the Conquest of Quebec | Wolfe; Or, The Conquest of Quebec | Buel, Kenean                  | Kenean Buel           | tt0004830 |
| 1746572783 | 1931 | 1931 | The Fighting Sheriff              | The Fighting Sheriff              | King, Louis                   | Louis King            | tt0021863 |
| 1746574402 | 1951 | 1951 | Sunny Side of the Street          | Sunny Side of the Street          | Quine, Richard                | Richard Quine         | tt0044090 |
| 1746218871 | 1975 | 1975 | Cooley High                       | Cooley High                       | Schultz, Michael              | Michael Schultz       | tt0072820 |
| 1746524602 | 1916 | 1916 | Bettina Loved a Soldier           | Bettina Loved a Soldier           | Julian, Rupert                | Rupert Julian         | tt0006424 |
| 1746475918 | 1945 | 1945 | Where Do We Go from Here?         | Where Do We Go from Here?         | Ratoff, Gregory               | Gregory Ratoff        | tt0038245 |
| 1746509203 | 1926 | 1926 | Money Talks                       | Money Talks                       | Mayo, Archie                  | Archie Mayo           | tt0017164 |
| 1746465264 | 1945 | 1945 | Hitchhike to Happiness            | Hitchhike to Happiness            | Santley, Joseph               | Joseph Santley        | tt0037782 |
| 1746582379 | 1931 | 1931 | Ex-Bad Boy                        | Ex Bad Boy                        | Moore, Vin                    | Vin Moore             | tt0021841 |
| 1745340816 | 2001 | 2001 | Panic                             | Manic                             | Bromell, Henry                | Jordan Melamed        | tt0252684 |
| 1746502149 | 1923 | 1923 | King's Creek Law                  | King's Creek Law                  | Maloney, Leo; Williamson, Bob | Leo D. Maloney        | tt0014180 |
| 1746580276 | 1936 | 1936 | My American Wife                  | My American Wife                  | Young, Harold                 | Harold Young          | tt0028009 |
| 1746585454 | 1940 | 1940 | The Old Swimmin' Hole             | The Old Swimmin' Hole             | McGowan, Robert               | Robert F. McGowan     | tt0032864 |
| 1746504017 | 1919 | 1919 | A Regular Fellow                  | A Regular Fellow                  | Cabanne, Christy              | Christy Cabanne       | tt0010620 |
| 1746514426 | 1914 | 1914 | The Floor Above                   | The Floor Above                   | Kirkwood, James               | James Kirkwood        | tt0003972 |
| 1746487859 | 1920 | 1920 | The Deep Purple                   | The Deep Purple                   | Walsh, R. A.                  | Raoul Walsh           | tt0011102 |
| 1746500608 | 1924 | 1924 | Virtue's Revolt                   | Virtue's Revolt                   | Chapin, James                 | James Chapin          | tt0015463 |

|            |      |      |                                  |                                  |                                     |                      |           |
|------------|------|------|----------------------------------|----------------------------------|-------------------------------------|----------------------|-----------|
| 1746577032 | 1950 | 1950 | 711 Ocean Drive                  | 711 Ocean Drive                  | Newman, Joseph M.                   | Joseph M. Newman     | tt0042176 |
| 1746576955 | 1963 | 1963 | Around the World With Nothing On | Around the World with Nothing On | Knight, Arthur                      | Arthur Knight        | tt2358893 |
| 1746566884 | 1933 | 1933 | Tugboat Annie                    | Tugboat Annie                    | LeRoy, Mervyn                       | Mervyn LeRoy         | tt0024701 |
| 1746569861 | 1957 | 1957 | Hidden Fear                      | Hidden Fear                      | DeToth, Andre                       | André De Toth        | tt0050506 |
| 1746474960 | 1944 | 1944 | Sergeant Mike                    | Sergeant Mike                    | Levin, Henry                        | Henry Levin          | tt0038074 |
| 1746410805 | 1994 | 1994 | Trading Mom                      | Trading Mom                      | Brelis, Tia                         | Tia Brelis           | tt0111470 |
| 1746433751 | 1996 | 1996 | Foxfire                          | Foxfire                          | Haywood-Carter, Annette             | Annette Haywood      | tt0116353 |
| 1746523083 | 1923 | 1923 | Bella Donna                      | Bella Donna                      | Fitzmaurice, George                 | George Fitzmaurice   | tt0013867 |
| 1746475274 | 1946 | 1946 | The Green Years                  | The Green Years                  | Saville, Victor                     | Victor Saville       | tt0038578 |
| 1746520062 | 1925 | 1925 | The Man Without a Country        | The Man Without a Country        | Lee, Rowland V.                     | Rowland V. Lee       | tt0016078 |
| 1746508918 | 1949 | 1949 | Sheriff of Wichita               | Sheriff of Wichita               | Springsteen, R. G.                  | R.G. Springsteen     | tt0041869 |
| 1746525176 | 1921 | 1921 | A Parisian Scandal               | A Parisian Scandal               | Cox, George L.                      | George L. Cox        | tt0012550 |
| 1746465396 | 1944 | 1944 | Till We Meet Again               | Till We Meet Again               | Borzage, Frank                      | Frank Borzage        | tt0037379 |
| 1746584138 | 1938 | 1938 | There's Always a Woman           | There's Always a Woman           | Hall, Alexander                     | Alexander Hall       | tt0030857 |
| 1746200319 | 1968 | 1968 | How Sweet It Is!                 | How Sweet It Is!                 | Paris, Jerry                        | Jerry Paris          | tt0063098 |
| 1746580413 | 1938 | 1938 | Romance in the Dark              | Romance in the Dark              | Potter, H. C.                       | H.C. Potter          | tt0030691 |
| 1745293163 | 2006 | 2006 | Wordplay                         | Wordplay                         | Creadon, Patrick                    | Patrick Creadon      | tt0492506 |
| 1746566144 | 1954 | 1954 | The Barefoot Contessa            | The Barefoot Contessa            | Mankiewicz, Joseph L.               | Joseph L. Mankiewicz | tt0046754 |
| 1746436559 | 1941 | 1941 | The Pioneers                     | The Pioneers                     | Herman, Al                          | Albert Herman        | tt0034029 |
| 1746508230 | 1949 | 1949 | Souls of Sin                     | Souls of Sin                     | Lindsay, Powell                     | Powell Lindsay       | tt0041903 |
| 1746571011 | 1934 | 1934 | The Age of Innocence             | The Age of Innocence             | Moeller, Philip                     | Philip Moeller       | tt0024819 |
| 1746573810 | 1957 | 1957 | Up In Smoke                      | Up in Smoke                      | Beaudine, William                   | William Beaudine     | tt0051143 |
| 1746580886 | 1937 | 1937 | On Such a Night                  | On Such a Night                  | Dupont, E. A.                       | Ewald André Dupont   | tt0029344 |
| 1746438300 | 1943 | 1943 | The Constant Nymph               | The Constant Nymph               | Goulding, Edmund                    | Edmund Goulding      | tt0035751 |
| 1746533222 | 1915 | 1915 | Jewel                            | Jewel                            | Smalley, Phillips                   | Phillips Smalley     | tt0005568 |
| 1746219153 | 1975 | 1976 | Adios Amigo                      | Adiós Amigo                      | Williamson, Fred                    | Fred Williamson      | tt0072604 |
| 1746578589 | 1960 | 1960 | The Unforgiven                   | The Unforgiven                   | Huston, John                        | John Huston          | tt0054428 |
| 1746508177 | 1925 | 1925 | The Making of O'Malley           | The Making of O'Malley           | Hillyer, Lambert                    | Lambert Hillyer      | tt0016071 |
| 1746235237 | 1971 | 1971 | 200 Motels                       | 200 Motels                       |                                     | Tony Palmer          | tt0066732 |
| 1746500316 | 1927 | 1927 | The Prairie King                 | The Prairie King                 | Eason, Reeves                       | B. Reeves Eason      | tt0018275 |
| 1746565898 | 1953 | 1953 | Sea Devils                       | Sea Devils                       | Walsh, Raoul                        | Raoul Walsh          | tt0046286 |
| 1746199794 | 1968 | 1968 | The Young Runaways               | The Young Runaways               | Dreifuss, Arthur                    | Arthur Dreifuss      | tt0063827 |
| 1746219192 | 1979 | 1979 | Breaking Away                    | Breaking Away                    | Yates, Peter                        | Peter Yates          | tt0078902 |
| 1746211498 | 1972 | 1972 | The New Centurions               | The New Centurions               | Fleischer, Richard                  | Richard Fleischer    | tt0068997 |
| 1746567740 | 1933 | 1933 | Infernal Machine                 | Infernal Machine                 | Varnel, Marcel                      | Marcel Varnel        | tt0024180 |
| 1746580552 | 1938 | 1938 | Freshman Year                    | Freshman Year                    | McDonald, Frank                     | Frank McDonald       | tt0030158 |
| 1746422574 | 1995 | 1995 | Devil in a Blue Dress            | Devil in a Blue Dress            | Franklin, Carl                      | Carl Franklin        | tt0112857 |
| 1746570741 | 1934 | 1934 | The Ninth Guest                  | The Ninth Guest                  | Neill, R. William                   | Roy William Neill    | tt0025566 |
| 1746582181 | 1928 | 1928 | The Speed Classic                | The Speed Classic                | Mitchell, Bruce                     | Bruce Mitchell       | tt0019411 |
| 1746219658 | 1974 | 1974 | Chinatown                        | Chinatown                        | Polanski, Roman                     | Roman Polanski       | tt0071315 |
| 1745342845 | 2008 | 2008 | Drillbit Taylor                  | Drillbit Taylor                  | Brill, Steven                       | Steven Brill         | tt0817538 |
| 1746583016 | 1939 | 1939 | My Son Is a Criminal             | My Son Is a Criminal             | Coleman, C. C.                      | Charles C. Coleman   | tt0031699 |
| 1746573803 | 1960 | 1960 | All the Young Men                | All the Young Men                | Bartlett, Hall                      | Hall Bartlett        | tt0053583 |
| 1746216705 | 1969 | 1969 | The Fantastic Plastic Machine    | The Fantastic Plastic Machine    | Blum, Eric; Blum, Lowell            | Eric Blum            | tt0233702 |
| 1746577867 | 1938 | 1938 | Ladies in Distress               | Ladies in Distress               | Meins, Gus                          | Gus Meins            | tt0030339 |
| 1746584030 | 1940 | 1940 | New Moon                         | New Moon                         | Leonard, Robert Z.; Van Dyke, W. S. | Robert Z. Leonard    | tt0032840 |
| 1746577061 | 1951 | 1951 | According to Mrs. Hoyle          | According to Mrs. Hoyle          | Yarbrough, Jean                     | Jean Yarbrough       | tt0043260 |
| 1746464806 | 1941 | 1941 | Richest Man in Town              | The Richest Man in Town          | Barton, Charles                     | Charles Barton       | tt0034099 |
| 1746499989 | 1949 | 1949 | The Big Wheel                    | The Big Wheel                    | Ludwig, Edward                      | Edward Ludwig        | tt0041179 |
| 1769971950 | 1969 | 1969 | Lady Godiva Rides                | Lady Godiva Rides                | Stephen, A. C.                      | Stephen C. Apostolof | tt0125332 |
| 1746503011 | 1915 | 1915 | What Happened to Jones           | What Happened to Jones           | Mace, Fred                          | Fred Mace            | tt0006253 |
| 1746466980 | 1917 | 1917 | The High Sign                    | The High Sign                    | Clifton, Elmer                      | Elmer Clifton        | tt0008095 |
| 1746473920 | 1944 | 1944 | The Last Horseman                | The Last Horseman                | Berke, William                      | William Berke        | tt0037006 |
| 1745341845 | 2002 | 2002 | Welcome to Collinwood            | Welcome to Collinwood            | Russo, Anthony ; Russo, Joe         | Anthony Russo        | tt0271259 |
| 1746394200 | 1983 | 1983 | Easy Money                       | Easy Money                       | Signorelli, James                   | James Signorelli     | tt0085470 |
| 1746234120 | 1965 | 1964 | The Pawnbroker                   | The Pawnbroker                   | Lumet, Sidney                       | Sidney Lumet         | tt0059575 |
| 1746514791 | 1915 | 1915 | The Turn of the Road             | The Turn of the Road             | Johnson, Tefft                      | Tefft Johnson        | tt0006187 |

|            |      |      |                                               |                                               |                                |                        |           |
|------------|------|------|-----------------------------------------------|-----------------------------------------------|--------------------------------|------------------------|-----------|
| 1746580720 | 1938 | 1938 | Sunset Trail                                  | Sunset Trail                                  | Selander, Lesley               | Lesley Selander        | tt0030812 |
| 1746498312 | 1921 | 1921 | The Snob                                      | The Snob                                      | Wood, Sam                      | Sam Wood               | tt0012705 |
| 1746570274 | 1934 | 1934 | Sing Sing Nights                              | Sing Sing Nights                              | Collins, Lewis D.              | Lewis D. Collins       | tt0027003 |
| 1769970776 | 1912 | 1912 | The Ghost of Sulphur Mountain                 | The Ghost of Sulphur Mountain                 |                                | Gaston Méliès          | tt0403068 |
| 1746567299 | 1934 | 1934 | Mystery Liner                                 | Mystery Liner                                 | Nigh, William                  | William Nigh           | tt0025543 |
| 1745394542 | 2010 | 2010 | Gulliver's Travels                            | Gulliver's Travels                            | Letterman, Rob                 | Rob Letterman          | tt1320261 |
| 1746491772 | 1948 | 1948 | Night Has a Thousand Eyes                     | Night Has a Thousand Eyes                     | Farrow, John                   | John Farrow            | tt0040643 |
| 1746582877 | 1938 | 1938 | Vivacious Lady                                | Vivacious Lady                                | Stevens, George                | George Stevens         | tt0030944 |
| 1746572249 | 1931 | 1931 | The Easiest Way                               | The Easiest Way                               | Conway, Jack                   | Jack Conway            | tt0021825 |
| 1746499871 | 1948 | 1948 | Tenth Avenue Angel                            | Tenth Avenue Angel                            | Rowland, Roy                   | Roy Rowland            | tt0040865 |
| 1746573986 | 1958 | 1958 | The Heart Is a Rebel                          | The Heart Is a Rebel                          | Ross, Dick                     | Dick Ross              | tt0288042 |
| 1746423713 | 1940 | 1940 | Heroes of the Saddle                          | Heroes of the Saddle                          | Witney, William                | William Witney         | tt0032584 |
| 1745359168 | 2004 | 2004 | Friday Night Lights                           | Friday Night Lights                           | Berg, Peter                    | Peter Berg             | tt0390022 |
| 1746574335 | 1963 | 1964 | Twice a Man                                   | Twice a Man                                   | Markopoulos, Gregory J.        | Gregory J. Markopoulos | tt0129470 |
| 1746574086 | 1956 | 1956 | The Revolt of Mamie Stover                    | The Revolt of Mamie Stover                    | Walsh, Raoul                   | Raoul Walsh            | tt0049672 |
| 1745293831 | 2007 | 2007 | Borderland                                    | Borderland                                    | Berman, Zev                    | Zev Berman             | tt0452592 |
| 1746485069 | 1919 | 1919 | His Divorced Wife                             | His Divorced Wife                             | Gerrard, Douglas               | Douglas Gerrard        | tt0010254 |
| 1746534800 | 1921 | 1921 | The Man Worth While                           | The Man Worthwhile                            | Fielding, Romaine              | Romaine Fielding       | tt0012440 |
| 1746583623 | 1930 | 1930 | Chasing Rainbows                              | Chasing Rainbows                              | Reisner, Charles F.            | Charles Reisner        | tt0020336 |
| 1746584592 | 1931 | 1931 | Once a Sinner                                 | Once a Sinner                                 | McClintic, Guthrie             | Guthrie McClintic      | tt0021211 |
| 1746218927 | 1979 | 1979 | Tourist Trap                                  | Tourist Trap                                  | Schmoeller, David              | David Schmoeller       | tt0080040 |
| 1746523224 | 1915 | 1915 | The Victory of Virtue                         | The Victory of Virtue                         | Webster, Harry McRae           | Harry McRae Webster    | tt0006221 |
| 1746576847 | 1931 | 1931 | Side Show                                     | Side Show                                     | Del Ruth, Roy                  | Roy Del Ruth           | tt0022381 |
| 1746533054 | 1927 | 1927 | With Sitting Bull at the Spirit Lake Massacre | With Sitting Bull at the Spirit Lake Massacre | Bradbury, Robert North         | Robert N. Bradbury     | tt0017399 |
| 1746455629 | 2000 | 2000 | Gladiator                                     | Gladiator                                     | Scott, Ridley                  | Ridley Scott           | tt0172495 |
| 1746582581 | 1938 | 1938 | Merrily We Live                               | Merrily We Live                               | McLeod, Norman Z.              | Norman Z. McLeod       | tt0030442 |
| 1746578758 | 1959 | 1959 | The Man Who Understood Women                  | The Man Who Understood Women                  | Johnson, Nunnally              | Nunnally Johnson       | tt0053043 |
| 1746584547 | 1958 | 1958 | Tank Battalion                                | Tank Battalion                                | Rose, Sherman A.               | Sherman A. Rose        | tt0051052 |
| 1746454127 | 2000 | 2000 | High Fidelity                                 | High Fidelity                                 | Frears, Stephen                | Stephen Frears         | tt0146882 |
| 1746502414 | 1916 | 1915 | Between Men                                   | Between Men                                   | Hart, William S.               | William S. Hart        | tt0004962 |
| 1746566251 | 1958 | 1958 | The Old Man and the Sea                       | The Old Man and the Sea                       | Sturges, John; Zinnemann, Fred | John Sturges           | tt0052027 |
| 1746532712 | 1915 | 1915 | The Song of the Wage Slave                    | The Song of the Wage Slave                    |                                | Herbert Blaché         | tt0006072 |
| 1746554264 | 1965 | 1965 | Echoes of Silence                             | Echoes of Silence                             | Goldman, Peter Emanuel         | Peter Emmanuel Goldman | tt0208927 |
| 1746561056 | 1932 | 1932 | The Devil on Deck                             | Devil on Deck                                 | Fox, Wallace W.                | Wallace Fox            | tt0022813 |
| 1746582951 | 1935 | 1935 | After Office Hours                            | After Office Hours                            | Leonard, Robert Z.             | Robert Z. Leonard      | tt0026043 |
| 1746555872 | 1956 | 1956 | Tension at Table Rock                         | Tension at Table Rock                         | Warren, Charles Marquis        | Charles Marquis Warren | tt0049834 |
| 1746581845 | 1929 | 1929 | Love in the Desert                            | Love in the Desert                            | Melford, George                | George Melford         | tt0020116 |
| 1746512419 | 1922 | 1922 | Conquering the Woman                          | Conquering the Woman                          | Vidor, King                    | King Vidor             | tt0013024 |
| 1746582498 | 1938 | 1938 | Penrod's Double Trouble                       | Penrod's Double Trouble                       | Seiler, Lewis                  | Lewis Seiler           | tt0030572 |
| 1746219195 | 1976 | 1976 | Grizzly                                       | Grizzly                                       | Girdler, William               | William Girdler        | tt0074593 |
| 1746583330 | 1950 | 1950 | Trail of Robin Hood                           | Trail of Robin Hood                           | Witney, William                | William Witney         | tt0043061 |
| 1746524114 | 1927 | 1927 | Becky                                         | Becky                                         | McCarthy, John P.              | John P. McCarthy       | tt0017666 |
| 1746571342 | 1934 | 1934 | The Black Cat                                 | The Black Cat                                 | Ulmer, Edgar G.                | Edgar G. Ulmer         | tt0024894 |
| 1746568012 | 1932 | 1932 | Too Busy to Work                              | Too Busy to Work                              | Blystone, John                 | John G. Blystone       | tt0023606 |
| 1746582987 | 1940 | 1940 | Dark Command                                  | Dark Command                                  | Walsh, Raoul                   | Raoul Walsh            | tt0032383 |
| 1746486864 | 1920 | 1920 | The Isle of Destiny                           | The Isle of Destiny                           | Lane, Tamar                    | Tamar Lane             | tt0195841 |
| 1746235653 | 1974 | 1974 | Blazing Saddles                               | Blazing Saddles                               | Brooks, Mel                    | Mel Brooks             | tt0071230 |
| 1746434937 | 1996 | 1996 | Daylight                                      | Daylight                                      | Cohen, Rob                     | Rob Cohen              | tt0116040 |
| 1746578618 | 1963 | 1963 | Showdown                                      | Showdown                                      | Springsteen, R. G.             | R.G. Springsteen       | tt0057497 |
| 1746581688 | 1928 | 1928 | Lost in the Arctic                            | Lost in the Arctic                            | Snow, Sydney; Snow, H. A.      | H.A. Snow              | tt0020110 |
| 1746502930 | 1915 | 1915 | Infatuation                                   | Infatuation                                   | Pollard, Harry                 | Harry A. Pollard       | tt0005548 |
| 1746420146 | 1994 | 1994 | Lassie                                        | Lassie                                        | Petrie, Daniel                 | Daniel Petrie          | tt0110305 |
| 1746503000 | 1915 | 1915 | The Menace of the Mute                        | The Menace of the Mute                        | Miller, Ashley; Daly, Arnold   | Ashley Miller          | tt0005738 |
| 1746437000 | 1940 | 1940 | The Leatherpushers                            | The Leather Pushers                           | Rawlins, John                  | John Rawlins           | tt0032695 |
| 1746584589 | 1929 | 1929 | The White Outlaw                              | The White Outlaw                              | Horner, Robert J.              | Robert J. Horner       | tt0020584 |
| 1746409054 | 1983 | 1983 | WarGames                                      | WarGames                                      | Badham, John                   | John Badham            | tt0086567 |
| 1745282681 | 2007 | 2007 | Lars and the Real Girl                        | Lars and the Real Girl                        | Gillespie, Craig               | Craig Gillespie        | tt0805564 |

|            |      |      |                                |                                 |                              |                        |            |
|------------|------|------|--------------------------------|---------------------------------|------------------------------|------------------------|------------|
| 1746420578 | 1940 | 1940 | Thundering Frontier            | Thundering Frontier             | Lederman, D. Ross            | D. Ross Lederman       | tt0033163  |
| 1746582231 | 1931 | 1931 | Illicit                        | Illicit                         | Mayo, Archie                 | Archie Mayo            | tt0021992  |
| 1746465132 | 1942 | 1942 | You're Telling Me              | You're Telling Me               | Lamont, Charles              | Charles Lamont         | tt0035584  |
| 1746474133 | 1947 | 1947 | Cheyenne                       | Cheyenne                        | Walsh, Raoul                 | Raoul Walsh            | tt0039260  |
| 1745340028 | 2003 | 2003 | Darkness Falls                 | Darkness Falls                  | Liebesman, Jonathan          | Jonathan Liebesman     | tt0282209  |
| 1746574959 | 1937 | 1937 | Women Men Marry                | The Women Men Marry             | Taggart, Errol               | Errol Taggart          | tt0029793  |
| 1746514703 | 1916 | 1916 | Pillars of Society             | Pillars of Society              |                              | Raoul Walsh            | tt0007184  |
| 1746500126 | 1925 | 1925 | Wandering Footsteps            | Wandering Footsteps             | Rosen, Phil                  | Phil Rosen             | tt0016502  |
| 1746434289 | 1997 | 1997 | Fast, Cheap & Out of Control   | Fast, Cheap & Out of Control    | Morris, Errol                | Errol Morris           | tt0119107  |
| 1746475949 | 1947 | 1946 | Going to Glory, Come to Jesus  | Going to Glory... Come to Jesus |                              | T. Meyer               | tt0038568  |
| 1746420402 | 1992 | 1992 | Freejack                       | Freejack                        | Murphy, Geoff                | Geoff Murphy           | tt0104299  |
| 1746476207 | 1947 | 1947 | Philo Vance's Secret Mission   | Philo Vance's Secret Mission    | LeBorg, Reginald             | Reginald Le Borg       | tt0039703  |
| 1746500736 | 1924 | 1924 | The Law and the Lady           | The Law and the Lady            | McCutcheon, John L.          | John L. McCutcheon     | tt0015057  |
| 1746424419 | 1940 | 1940 | Moon over Burma                | Moon Over Burma                 | King, Louis                  | Louis King             | tt0032809  |
| 1746508210 | 1927 | 1927 | Streets of Shanghai            | Streets of Shanghai             | Gasnier, Louis               | Louis J. Gasnier       | tt0019432  |
| 1746219647 | 1972 | 1972 | Now You See Him, Now You Don't | Now You See Him, Now You Don't  | Butler, Robert               | Robert Butler          | tt0069031  |
| 1746584944 | 1939 | 1939 | Private Detective              | Private Detective               | Smith, Noel                  | Noel M. Smith          | tt0031825  |
| 1746208293 | 1969 | 1969 | How To Commit Marriage         | How to Commit Marriage          | Panama, Norman               | Norman Panama          | tt0064449  |
| 1746556036 | 1955 | 1954 | The Violent Men                | The Violent Men                 | Maté, Rudolph                | Rudolph Maté           | tt0048789  |
| 1745272882 | 2000 | 2000 | Shaft                          | Shaft                           | Singleton, John              | John Singleton         | tt0162650  |
| 1746454701 | 1940 | 1940 | Andy Hardy Meets Debutante     | Andy Hardy Meets Debutante      | Seitz, George B.             | George B. Seitz        | tt0032206  |
| 1746573879 | 1960 | 1960 | The Apartment                  | The Apartment                   | Wilder, Billy                | Billy Wilder           | tt0053604  |
| 1745359477 | 2004 | 2004 | Secret Window                  | Secret Window                   | Koepp, David                 | David Koepp            | tt0363988  |
| 1746496566 | 1918 | 1918 | Brown of Harvard               | Brown of Harvard                | Beaumont, Harry              | Harry Beaumont         | tt0008932  |
| 1746440010 | 1996 | 1996 | The People vs. Larry Flynt     | The People vs. Larry Flynt      | Forman, Milos                | Milos Forman           | tt0117318  |
| 1746576227 | 1932 | 1932 | Scarface                       | Scarface                        | Hawks, Howard                | Howard Hawks           | tt0023427  |
| 1746567825 | 1933 | 1933 | Obey the Law                   | Obey the Law                    | Stoloff, Benjamin            | Benjamin Stoloff       | tt0024398  |
| 1746502272 | 1915 | 1915 | Du Barry                       | Du Barry                        | Bencivenga, Edoardo          | Edoardo Bencivenga     | tt0005229  |
| 1745358016 | 2002 | 2002 | Dragonfly                      | Dragonfly                       | Shadyac, Tom                 | Tom Shadyac            | tt0259288  |
| 1769970643 | 1968 | 1968 | Orgy Girls '69                 | Orgy Girls '69                  | Canton, Robert               | Robert Canton          | tt0130164  |
| 1746393566 | 1984 | 1984 | Finders Keepers                | Finders Keepers                 | Lester, Richard              | Richard Lester         | tt0087260  |
| 1746504330 | 1920 | 1920 | Birthright                     | Birthright                      | Hemmer, Edward               | Edward L. Hemmer       | tt0186881  |
| 1746433914 | 1991 | 1991 | JFK                            | JFK                             | Stone, Oliver                | Oliver Stone           | tt0102138  |
| 1746585250 | 1929 | 1929 | Sally                          | Sally                           | Dillon, John Francis         | John Francis Dillon    | tt0020358  |
| 1769976194 | 1918 | 1918 | Beauties and Bombs             | Beauties and Bombs              | Seiter, William A.           | William A. Seiter      | tt1315929  |
| 1746581452 | 1950 | 1950 | Trigger, Jr.                   | Trigger, Jr.                    | Witney, William              | William Witney         | tt0043069  |
| 1746500043 | 1949 | 1949 | Arson-Inc.                     | Arson, Inc.                     | Berke, William               | William Berke          | tt0041133  |
| 1746574950 | 1933 | 1933 | Strictly Personal              | Strictly Personal               | Murphy, Ralph                | Ralph Murphy           | tt0024622  |
| 1746580920 | 1959 | 1958 | Slippery When Wet              | Slippery When Wet               | Brown, Bruce A.              | Bruce Brown            | tt0298155  |
| 1746497521 | 1917 | 1917 | Twin Kiddies                   | Twin Kiddies                    | King, Henry                  | Henry King             | tt0008706  |
| 1746530791 | 1950 | 1950 | Whirlpool                      | Whirlpool                       | Preminger, Otto              | Otto Preminger         | tt0042039  |
| 1746497055 | 1918 | 1918 | The Law That Divides           | The Law That Divides            | Mitchell, Howard M.          | Howard M. Mitchell     | tt0186289  |
| 1746569548 | 1958 | 1958 | Desert Hell                    | Desert Hell                     | Warren, Charles Marquis      | Charles Marquis Warren | tt0051531  |
| 1746422924 | 1993 | 1993 | Cool Runnings                  | Cool Runnings                   | Turteltaub, Jon              | Jon Turteltaub         | tt0106611  |
| 1746542707 | 1926 | 1925 | Hard Boiled                    | Hard Boiled                     | Blystone, J. G.              | Leo McCarey            | tt0209012  |
| 1746514562 | 1923 | 1923 | Three O'Clock in the Morning   | Three O'Clock in the Morning    | Webb, Kenneth                | Kenneth S. Webb        | tt0014540  |
| 1746500465 | 1926 | 1926 | The Country Beyond             | The Country Beyond              | Cummings, Irving             | Irving Cummings        | tt0016744  |
| 1746208222 | 1969 | 1968 | Last Summer Won't Happen       | Last Summer Won't Happen        | Gessner, Peter; Hurwitz, Tom | Peter Gessner          | tt2221727  |
| 1746581162 | 1961 | 1961 | When the Clock Strikes         | When the Clock Strikes          | Cahn, Edward L.              | Edward L. Cahn         | tt0055617  |
| 1769971156 | 1969 | 1969 | The Filth Shop                 | The Filth Shop                  |                              | Looney Bear            | tt0218238  |
| 1746582630 | 1937 | 1937 | Flight from Glory              | Flight from Glory               | Landers, Lew                 | Lew Landers            | tt0028880  |
| 1746185677 | 1910 | 1910 | An Advertisement Answered      | An Advertisement Answered       | Ricketts, Thomas             | Tom Ricketts           | tt11661349 |
| 1746568015 | 1932 | 1932 | The Broken Wing                | The Broken Wing                 | Corrigan, Lloyd              | Lloyd Corrigan         | tt0022726  |
| 1746570163 | 1952 | 1952 | A Yank in Indo-China           | A Yank in Indo China            | Grissell, Wallace A.         | Wallace Grissell       | tt0045342  |
| 1746576971 | 1962 | 1962 | Surftide 77                    | Surftide 77                     | Frost, R. L.                 | Lee Frost              | tt0056538  |
| 1746573817 | 1958 | 1958 | The Case Against Brooklyn      | The Case Against Brooklyn       | Wendkos, Paul                | Paul Wendkos           | tt0051456  |
| 1746582453 | 1937 | 1937 | Sky Racket                     | Sky Racket                      | Katzman, Sam                 | Sam Katzman            | tt0140551  |

|            |      |      |                               |                               |                                 |                    |           |
|------------|------|------|-------------------------------|-------------------------------|---------------------------------|--------------------|-----------|
| 1746507569 | 1926 | 1926 | The Imposter                  | The Impostor                  | Withey, Chet                    | Chester Withey     | tt0016993 |
| 1746520199 | 1925 | 1925 | Lovers in Quarantine          | Lovers in Quarantine          | Tuttle, Frank                   | Frank Tuttle       | tt0016048 |
| 1746583846 | 1931 | 1931 | Kid from Arizona              | The Kid from Arizona          | Horner, Robert J.               | Robert J. Horner   | tt0022024 |
| 1746512912 | 1915 | 1915 | Ranson's Folly                | Ranson's Folly                | Ridgely, Richard                | Richard Ridgely    | tt0005950 |
| 1746487490 | 1919 | 1919 | The Misleading Widow          | The Misleading Widow          | Robertson, John S.              | John S. Robertson  | tt0010469 |
| 1746393459 | 1986 | 1986 | Back to School                | Back to School                | Metter, Alan                    | Alan Metter        | tt0090685 |
| 1746409680 | 1985 | 1985 | The Return of the Living Dead | The Return of the Living Dead | O'Bannon, Dan                   | Dan O'Bannon       | tt0089907 |
| 1745272370 | 2000 | 2000 | The Replacements              | The Replacements              | Deutch, Howard                  | Howard Deutch      | tt0191397 |
| 1746532428 | 1915 | 1915 | A Butterfly on the Wheel      | A Butterfly on the Wheel      | Tourneur, Maurice               | Maurice Tourneur   | tt0005041 |
| 1746585337 | 1930 | 1930 | Man Trouble                   | Man Trouble                   | Viertel, Berthold               | Berthold Viertel   | tt0021114 |
| 1746520140 | 1925 | 1925 | The Circle                    | The Circle                    | Borzage, Frank                  | Frank Borzage      | tt0015684 |
| 1746561211 | 1932 | 1932 | The Animal Kingdom            | The Animal Kingdom            | Griffith, Edward H.             | Edward H. Griffith | tt0022628 |
| 1746577534 | 1934 | 1934 | The Lost Jungle               | The Lost Jungle               | Schaefer, Armand; Howard, David | David Howard       | tt0025420 |
| 1746453641 | 1942 | 1942 | Johnny Doughboy               | Johnny Doughboy               | Auer, John H.                   | John H. Auer       | tt0034921 |
| 1769970497 | 1966 | 1965 | The Love Statue               | The Love Statue               | Durston, David                  | David E. Durston   | tt0061030 |
| 1746515812 | 1920 | 1920 | The Virgin of Stamboul        | The Virgin of Stamboul        | Browning, Tod                   | Tod Browning       | tt0011830 |
| 1746491814 | 1944 | 1944 | Up in Arms                    | Up in Arms                    | Nugent, Elliott                 | Elliott Nugent     | tt0037420 |
| 1746570593 | 1934 | 1934 | Heat Lightning                | Heat Lightning                | LeRoy, Mervyn                   | Mervyn LeRoy       | tt0025228 |
| 1746422242 | 1990 | 1989 | Robot Jox                     | Robot Jox                     | Gordon, Stuart                  | Stuart Gordon      | tt0102800 |
| 1746577768 | 1938 | 1938 | The Little Adventuress        | The Little Adventuress        | Lederman, D. Ross               | D. Ross Lederman   | tt0030369 |
| 1746583452 | 1930 | 1930 | East Is West                  | East Is West                  | Bell, Monta                     | Monta Bell         | tt0020850 |
| 1746423263 | 1992 | 1992 | Batman Returns                | Batman Returns                | Burton, Tim                     | Tim Burton         | tt0103776 |
| 1746493825 | 1910 | 1910 | The Troublesome Baby          | The Troublesome Baby          | Powell, Frank                   | Frank Powell       | tt0194472 |
| 1746437959 | 1941 | 1941 | Law of the Timber             | Law of the Timber             | Ray, Bernard B.                 | Bernard B. Ray     | tt0033820 |
| 1746577600 | 1933 | 1933 | Savage Gold                   | Savage Gold                   | Dyott, George M.                |                    | tt0195233 |
| 1746570591 | 1952 | 1952 | Kid Monk Baroni               | Kid Monk Baroni               | Schuster, Harold                | Harold D. Schuster | tt0044796 |
| 1746501394 | 1914 | 1914 | The Ordeal                    | The Ordeal                    | Davis, William S.               | Tom Santschi       | tt0313434 |
| 1746475911 | 1948 | 1948 | King of the Gamblers          | King of the Gamblers          | Blair, George                   | George Blair       | tt0040511 |
| 1746565943 | 1953 | 1953 | A Lion Is in the Streets      | A Lion Is in the Streets      | Walsh, Raoul                    | Raoul Walsh        | tt0046002 |
| 1746474455 | 1945 | 1945 | Strange Illusion              | Strange Illusion              | Ulmer, Edgar G.                 | Edgar G. Ulmer     | tt0038126 |
| 1746512420 | 1915 | 1915 | Zaza                          | Zaza                          | Porter, Edwin S.; Ford, Hugh    | Hugh Ford          | tt0006330 |
| 1746574927 | 1933 | 1933 | Sons of the Desert            | Sons of the Desert            | Seiter, William A.              | William A. Seiter  | tt0024601 |
| 1746424557 | 1942 | 1942 | Heart of the Rio Grande       | Heart of the Rio Grande       | Morgan, William                 | William Morgan     | tt0034833 |
| 1746576700 | 1931 | 1931 | Murder at Midnight            | Murder at Midnight            | Strayer, Frank                  | Frank R. Strayer   | tt0022172 |
| 1746475258 | 1944 | 1944 | Mr. Skeffington               | Mr. Skeffington               | Sherman, Vincent                | Vincent Sherman    | tt0037094 |
| 1746439410 | 1942 | 1942 | War Dogs                      | War Dogs                      | Luby, S. Roy                    | S. Roy Luby        | tt0035532 |
| 1746585433 | 1939 | 1939 | Island of Lost Men            | Island of Lost Men            | Neumann, Kurt                   | Kurt Neumann       | tt0031497 |
| 1746572189 | 1910 | 1910 | A Child's Impulse             | A Child's Impulse             | Griffith, D. W.                 | D. W. Griffith     | tt0001152 |
| 1746520784 | 1926 | 1926 | The Midnight Message          | The Midnight Message          | Hurst, Paul                     | Paul Hurst         | tt0017143 |
| 1746571631 | 1932 | 1932 | Come On Danger!               | Come on Danger!               | Hill, Robert                    | Robert F. Hill     | tt0022774 |
| 1746584882 | 1939 | 1939 | Home on the Prairie           | Home on the Prairie           | Townley, Jack                   | Jack Townley       | tt0031437 |
| 1746465268 | 1942 | 1942 | A Yank on the Burma Road      | A Yank on the Burma Road      | Seitz, George B.                | George B. Seitz    | tt0035574 |
| 1746419191 | 1987 | 1987 | The Whales of August          | The Whales of August          | Anderson, Lindsay               | Lindsay Anderson   | tt0094315 |
| 1746520516 | 1949 | 1949 | Tension                       | Tension                       | Berry, John                     | John Berry         | tt0041954 |
| 1746584070 | 1939 | 1939 | The Roaring Twenties          | The Roaring Twenties          | Walsh, Raoul                    | Raoul Walsh        | tt0031867 |
| 1746508379 | 1925 | 1925 | Double Action Daniels         | Double Action Daniels         | Thorpe, Richard                 | Richard Thorpe     | tt0130632 |
| 1746583417 | 1931 | 1931 | West of Cheyenne              | West of Cheyenne              | Webb, Harry S.                  | Harry S. Webb      | tt0022554 |
| 1746507612 | 1925 | 1925 | Up the Ladder                 | Up the Ladder                 | Sloman, Edward                  | Edward Sloman      | tt0016478 |
| 1746573599 | 1931 | 1931 | Two Gun Caballero             | Two Gun Caballero             | Nelson, Jack                    | Jack Nelson        | tt0022512 |
| 1746575036 | 1938 | 1938 | Desert Patrol                 | Desert Patrol                 | Neufield, Sam                   | Sam Neufield       | tt0030051 |
| 1746532989 | 1914 | 1914 | The Woman of Mystery          | The Woman of Mystery          | Blaché, Alice                   | Alice Guy          | tt0004833 |
| 1746485199 | 1919 | 1919 | Lure of Ambition              | The Lure of Ambition          | Lawrence, Edmund                | Edmund Lawrence    | tt0010407 |
| 1746520934 | 1948 | 1948 | Singin' Spurs                 | Singin' Spurs                 | Nazarro, Ray                    | Ray Nazarro        | tt0040792 |
| 1746582554 | 1935 | 1935 | Living on Velvet              | Living on Velvet              | Borzage, Frank                  | Frank Borzage      | tt0026644 |
| 1746578608 | 1959 | 1959 | That Kind of Woman            | That Kind of Woman            | Lumet, Sidney                   | Sidney Lumet       | tt0053349 |
| 1746454080 | 1943 | 1943 | Dixie Dugan                   | Dixie Dugan                   | Brower, Otto; McCarey, Ray      | Otto Brower        | tt0035811 |
| 1746455781 | 1998 | 1998 | Why Do Fools Fall in Love     | Why Do Fools Fall in Love     | Nava, Gregory                   | Gregory Nava       | tt0123324 |

|            |      |      |                               |                              |                      |                      |           |
|------------|------|------|-------------------------------|------------------------------|----------------------|----------------------|-----------|
| 1746200290 | 1966 | 1966 | Gambit                        | Gambit                       | Neame, Ronald        | Ronald Neame         | tt0060445 |
| 1746488011 | 1921 | 1921 | The Trail to Red Dog          | Trail to Red Dog             | Franchon, Leonard    | Leonard Franchon     | tt0173349 |
| 1746542762 | 1925 | 1925 | Shattered Lives               | Shattered Lives              | McCarty, Henry       | Henry McCarty        | tt0163827 |
| 1746573822 | 1957 | 1957 | The Unearthly                 | The Unearthly                | Peters, Brooke L.    | Boris Petroff        | tt0051134 |
| 1746583575 | 1951 | 1951 | Weekend with Father           | Week End with Father         | Sirk, Douglas        | Douglas Sirk         | tt0044199 |
| 1746474518 | 1945 | 1944 | The Thin Man Goes Home        | The Thin Man Goes Home       | Thorpe, Richard      | Richard Thorpe       | tt0037365 |
| 1746507719 | 1924 | 1924 | The Virgin                    | The Virgin                   | Neitz, Alvin J.      | Alan James           | tt0015461 |
| 1746500663 | 1950 | 1950 | Paid in Full                  | Paid in Full                 | Dieterle, William    | William Dieterle     | tt0042830 |
| 1746525021 | 1920 | 1920 | Old Dad                       | Old Dad                      | Ingraham, Lloyd      | Lloyd Ingraham       | tt0011529 |
| 1746453772 | 1943 | 1943 | The Man from the Rio Grande   | The Man from the Rio Grande  | Bretherton, Howard   | Howard Bretherton    | tt0036133 |
| 1746584939 | 1939 | 1939 | Blackwell's Island            | Blackwell's Island           | McGann, William      | William C. McGann    | tt0031103 |
| 1746581367 | 1910 | 1910 | The Little Spreewald Maiden   | The Little Spreewald Maiden  |                      | Sidney Olcott        | tt0255326 |
| 1746198428 | 1969 | 1969 | This Sporting House           | This Sporting House          | Sullivan, Ron        | Henri Pachard        | tt0259643 |
| 1745373933 | 2010 | 2010 | The Expendables               | The Expendables              | Stallone, Sylvester  | Sylvester Stallone   | tt1320253 |
| 1746533177 | 1927 | 1927 | The Valley of Hell            | The Valley of Hell           | Smith, Clifford S.   | Clifford Smith       | tt0017511 |
| 1746514733 | 1915 | 1915 | The Ingratitude of Liz Taylor | Ingratitude of Liz Taylor    | Le Saint, E. J.      | Edward LeSaint       | tt0142403 |
| 1746514346 | 1916 | 1916 | Playing with Fire             | Playing with Fire            | Grandon, Francis J.  | Francis J. Grandon   | tt0007190 |
| 1746423988 | 1943 | 1943 | Behind Prison Walls           | Behind Prison Walls          | Sekely, Steve        | Steve Sekely         | tt0035668 |
| 1746509323 | 1925 | 1925 | A Man of Iron                 | A Man of Iron                | Bennett, Whitman     | Whitman Bennett      | tt0134810 |
| 1746566982 | 1952 | 1952 | Kansas City Confidential      | Kansas City Confidential     | Karlson, Phil        | Phil Karlson         | tt0044789 |
| 1746561980 | 1956 | 1956 | The Lone Ranger               | The Lone Ranger              | Heisler, Stuart      | Stuart Heisler       | tt0048310 |
| 1746423336 | 1997 | 1997 | Nick and Jane                 | Nick and Jane                | Mauro, Rich          | Richard Mauro        | tt0117172 |
| 1746509213 | 1926 | 1926 | Flying High                   | Flying High                  | Hutchinson, Charles  | Charles Hutchison    | tt0016890 |
| 1746393052 | 1985 | 1985 | Too Scared to Scream          | Too Scared to Scream         | Lo Bianco, Tony      | Tony Lo Bianco       | tt0090186 |
| 1746500013 | 1949 | 1948 | Whispering Smith              | Whispering Smith             | Fenton, Leslie       | Leslie Fenton        | tt0040965 |
| 1746555000 | 1964 | 1964 | Behind the Nudist Curtain     | Behind the Nudist Curtain    | Wishman, Doris       | Doris Wishman        | tt0186864 |
| 1746566208 | 1958 | 1957 | The Astounding She-Monster    | The Astounding She Monster   | Ashcroft, Ronnie     | Ronald V. Ashcroft   | tt0050143 |
| 1746486275 | 1919 | 1919 | A Sporting Chance             | A Sporting Chance            | Melford, George      | Henry King           | tt0010729 |
| 1746453586 | 1941 | 1941 | Nice Girl?                    | Nice Girl?                   | Seiter, William A.   | William A. Seiter    | tt0033950 |
| 1746577131 | 1951 | 1951 | Hard, Fast and Beautiful      | Hard, Fast and Beautiful     | Lupino, Ida          | Ida Lupino           | tt0043619 |
| 1746562415 | 1955 | 1955 | The Glass Slipper             | The Glass Slipper            | Walters, Charles     | Charles Walters      | tt0048124 |
| 1746583214 | 1951 | 1951 | Royal Wedding                 | Royal Wedding                | Donen, Stanley       | Stanley Donen        | tt0043983 |
| 1746565952 | 1953 | 1953 | Fighter Attack                | Fighter Attack               | Selander, Lesley     | Lesley Selander      | tt0045765 |
| 1745271919 | 2001 | 2001 | Moulin Rouge!                 | Moulin Rouge!                | Luhrmann, Baz        | Baz Luhrmann         | tt0203009 |
| 1746575008 | 1937 | 1937 | Navy Blues                    | Navy Blues                   | Staub, Ralph         | Ralph Staub          | tt0029298 |
| 1746219234 | 1980 | 1980 | Serial                        | Serial                       | Persky, Bill         | Bill Persky          | tt0081485 |
| 1746560517 | 1965 | 1965 | The Great Sioux Massacre      | The Great Sioux Massacre     | Salkow, Sidney       | Sidney Salkow        | tt0059244 |
| 1746499921 | 1949 | 1949 | Western Renegades             | Western Renegades            | Fox, Wallace         | Wallace Fox          | tt0042037 |
| 1746524691 | 1914 | 1914 | A Million Bid                 | A Million Bid                | Ince, Ralph W.       | Ralph Ince           | tt0004335 |
| 1746439143 | 1942 | 1942 | George Washington Slept Here  | George Washington Slept Here | Keighley, William    | William Keighley     | tt0034780 |
| 1746566333 | 1957 | 1957 | The Green-Eyed Blonde         | The Green Eyed Blonde        | Girard, Bernard      | Bernard Girard       | tt0050457 |
| 1746438951 | 1943 | 1943 | Riding High                   | Riding High                  | Marshall, George     | George Marshall      | tt0036313 |
| 1746573672 | 1931 | 1931 | Bad Sister                    | The Bad Sister               | Henley, Hobart       | Hobart Henley        | tt0021636 |
| 1746584899 | 1940 | 1940 | Men Without Souls             | Men Without Souls            | Grindé, Nick         | Nick Grinde          | tt0032783 |
| 1746514838 | 1910 | 1910 | A Simple Mistake              | A Simple Mistake             |                      | Theodore Wharton     | tt1225735 |
| 1746574122 | 1959 | 1959 | The Big Fisherman             | The Big Fisherman            | Borzage, Frank       | Frank Borzage        | tt0052627 |
| 1746197927 | 1967 | 1967 | Warning Shot                  | Warning Shot                 | Kulik, Buzz          | Buzz Kulik           | tt0062473 |
| 1746464926 | 1944 | 1944 | Dixie Jamboree                | Dixie Jamboree               | Cabanne, Christy     | Christy Cabanne      | tt0036762 |
| 1746525160 | 1920 | 1920 | His Pajama Girl               | His Pajama Girl              | Edwards, Donald      | Donald Edwards       | tt0012286 |
| 1746574274 | 1963 | 1962 | Black Gold                    | Black Gold                   | Martinson, Leslie H. | Leslie H. Martinson  | tt0056871 |
| 1746513201 | 1916 | 1916 | The Ballet Girl               | The Ballet Girl              |                      | George Irving        | tt0006398 |
| 1746584399 | 1936 | 1936 | Everybody's Old Man           | Everybody's Old Man          | Flood, James         | James Flood          | tt0027587 |
| 1746501213 | 1914 | 1914 | The Dancer and the King       | The Dancer and the King      | Arnaud, E.           | Étienne Arnaud       | tt0003820 |
| 1746475718 | 1948 | 1948 | Sinister Journey              | Sinister Journey             | Archainbaud, George  | George Archainbaud   | tt0040793 |
| 1746574555 | 1936 | 1936 | Beware of Ladies              | Beware of Ladies             | Pichel, Irving       | Irving Pichel        | tt0027354 |
| 1746578977 | 1958 | 1958 | Terror from the Year 5,000    | Terror from the Year 5000    | Gurney, Robert J.    | Robert J. Gurney Jr. | tt0052286 |
| 1746504151 | 1921 | 1921 | The Conflict                  | The Conflict                 | Paton, Stuart        | Stuart Paton         | tt0012066 |

|                   |             |             |                                |                                |                                    |                     |                  |
|-------------------|-------------|-------------|--------------------------------|--------------------------------|------------------------------------|---------------------|------------------|
| 1746217947        | 1968        | 1969        | The Virgin President           | The Virgin President           | Ferguson, Graeme                   | Graeme Ferguson     | tt0063783        |
| 1746437374        | 1943        | 1943        | Law of the Saddle              | Law of the Saddle              | De Lay, Melville                   | Melville De Lay     | tt0037010        |
| 1746421293        | 1994        | 1993        | Mi Vida Loca                   | Mi vida loca                   | Anders, Allison                    | Allison Anders      | tt0107566        |
| 1746566025        | 1954        | 1954        | Susan Slept Here               | Susan Slept Here               | Tashlin, Frank                     | Frank Tashlin       | tt0047550        |
| 1746561575        | 1956        | 1956        | Massacre                       | Massacre                       | King, Louis                        | Louis King          | tt0049485        |
| 1746491752        | 1946        | 1946        | People Are Funny               | People Are Funny               | White, Sam                         | Sam White           | tt0038831        |
| 1746475519        | 1946        | 1946        | I've Always Loved You          | I've Always Loved You          | Borzage, Frank                     | Frank Borzage       | tt0038629        |
| 1746474807        | 1944        | 1944        | Shadow of Suspicion            | Shadow of Suspicion            | Beaudine, William                  | William Beaudine    | tt0037265        |
| 1746500693        | 1926        | 1926        | Devil's Island                 | Devil's Island                 | O'Connor, Frank                    | Frank O'Connor      | tt0016787        |
| 1769976129        | 1926        | 1926        | The Battling Kangaroo          | The Battling Kangaroo          | White, Jules                       | Jules White         | tt0367533        |
| 1746566825        | 1933        | 1933        | Wine, Women and Song           | Wine, Women and Song           | Brenon, Herbert                    | Herbert Brenon      | tt0024776        |
| 1746577050        | 1960        | 1960        | Portrait in Black              | Portrait in Black              | Gordon, Michael                    | Michael Gordon      | tt0054197        |
| 1746564734        | 1953        | 1953        | Dangerous Crossing             | Dangerous Crossing             | Newman, Joseph M.                  | Joseph M. Newman    | tt0045669        |
| 1745373305        | 2009        | 2009        | The Fourth Kind                | The Fourth Kind                | Osunsanmi, Olatunde                | Olatunde Osunsanmi  | tt1220198        |
| 1746210371        | 1970        | 1970        | Black Angels                   | Black Angels                   | Merrick, Laurence                  | Laurence Merrick    | tt0065474        |
| 1746393418        | 1983        | 1983        | Blue Thunder                   | Blue Thunder                   | Badham, John                       | John Badham         | tt0085255        |
| <b>1746503349</b> | <b>1920</b> | <b>1920</b> | <b>Miss Hobbs</b>              | <b>Miss Hobbs</b>              | <b>Crisp, Donald</b>               | <b>Donald Crisp</b> | <b>tt0011469</b> |
| 1746555044        | 1955        | 1955        | Paris Follies of 1956          | Paris Follies of 1956          | Goodwins, Leslie                   | Leslie Goodwins     | tt0048094        |
| 1746186057        | 1969        | 1969        | They Shoot Horses, Don't They? | They Shoot Horses, Don't They? | Pollack, Sydney                    | Sydney Pollack      | tt0065088        |
| 1746581750        | 1929        | 1929        | The Tip-Off                    | The Tip Off                    | Jason, Leigh                       | Leigh Jason         | tt0020506        |
| 1746419757        | 1994        | 1994        | Above the Rim                  | Above the Rim                  | Pollack, Jeff                      | Jeff Pollack        | tt0109035        |
| 1769970151        | 1912        | 1912        | Help! Help!                    | Help! Help!                    |                                    | Mack Sennett        | tt0002233        |
| 1746568340        | 1934        | 1934        | Here Comes the Groom           | Here Comes the Groom           | Sedgwick, Edward                   | Edward Sedgwick     | tt0025237        |
| 1746423276        | 1997        | 1997        | The Race to Save 100 Years     | The Race to Save 100 Years     | Benson, Scott                      | Scott Benson        | tt0128429        |
| 1746210872        | 1971        | 1971        | Bananas                        | Bananas                        | Allen, Woody                       | Woody Allen         | tt0066808        |
| 1746454855        | 1945        | 1945        | The Naughty Nineties           | The Naughty Nineties           | Yarbrough, Jean                    | Jean Yarbrough      | tt0037939        |
| 1746500110        | 1924        | 1924        | Three Women                    | Three Women                    | Lubitsch, Ernst                    | Ernst Lubitsch      | tt0015409        |
| 1746580600        | 1939        | 1939        | Panama Patrol                  | Panama Patrol                  | Lamont, Charles                    | Charles Lamont      | tt0031778        |
| 1746409090        | 1991        | 1991        | Bill & Ted's Bogus Journey     | Bill & Ted's Bogus Journey     | Hewitt, Pete                       | Peter Hewitt        | tt0101452        |
| 1746198227        | 1969        | 1969        | The Happy Ending               | The Happy Ending               | Brooks, Richard                    | Richard Brooks      | tt0064405        |
| 1746423296        | 1989        | 1989        | New Year's Day                 | New Year's Day                 | Jaglom, Henry                      | Henry Jaglom        | tt0097964        |
| 1746502323        | 1922        | 1922        | Forget-Me-Not                  | Forget Me Not                  | Van Dyke, W. S.                    | W.S. Van Dyke       | tt0013145        |
| 1746581901        | 1930        | 1930        | River's End                    | River's End                    | Curtiz, Michael                    | Michael Curtiz      | tt0021303        |
| 1746584609        | 1929        | 1929        | The Very Idea                  | The Very Idea                  | Rosson, Richard                    | Frank Craven        | tt0020549        |
| 1746454945        | 1945        | 1945        | River Gang                     | River Gang                     | David, Charles                     | Charles David       | tt0038030        |
| 1746512605        | 1915        | 1915        | The Marriage of Kitty          | The Marriage of Kitty          | Melford, George                    | George Melford      | tt0005715        |
| 1746393463        | 1983        | 1983        | Two of a Kind                  | Two of a Kind                  | Herzfeld, John                     | John Herzfeld       | tt0086494        |
| 1746514807        | 1928        | 1928        | The Midnight Taxi              | The Midnight Taxi              | Adolfi, John                       | John G. Adolfi      | tt0019165        |
| 1746524127        | 1922        | 1922        | Bulldog Courage                | Bulldog Courage                | Kull, Edward                       | Edward A. Kull      | tt0015652        |
| 1746577835        | 1937        | 1937        | The Crime Nobody Saw           | The Crime Nobody Saw           | Barton, Charles                    | Charles Barton      | tt0028748        |
| 1746563964        | 1952        | 1952        | Macao                          | Macao                          | Sternberg, Josef von               | Josef von Sternberg | tt0044863        |
| 1746464974        | 1947        | 1947        | The Hat-box Mystery            | The Hat Box Mystery            | Hillyer, Lambert                   | Lambert Hillyer     | tt0038590        |
| 1746514402        | 1915        | 1915        | The Flash of an Emerald        | The Flash of an Emerald        | Capellani, Albert                  | Albert Capellani    | tt0005331        |
| 1745293864        | 2005        | 2005        | Broken Flowers                 | Broken Flowers                 | Jarmusch, Jim                      | Jim Jarmusch        | tt0412019        |
| 1745374953        | 2010        | 2010        | How Do You Know                | How Do You Know                | Brooks, James L.                   | James L. Brooks     | tt1341188        |
| 1746578042        | 1935        | 1935        | The Great Hotel Murder         | The Great Hotel Murder         | Forde, Eugene                      | Eugene Forde        | tt0026437        |
| 1746198168        | 1965        | 1965        | Angel's Flight                 | Angel's Flight                 | Nassour, Raymond; Richardson, K. V | Raymond Nassour     | tt0316601        |
| 1746501219        | 1916        | 1916        | The Catspaw                    | The Catspaw                    | Wright, George A.                  | George A. Wright    | tt0157447        |
| 1746219383        | 1976        | 1976        | At the Earth's Core            | At the Earth's Core            | Connor, Kevin                      | Kevin Connor        | tt0074157        |
| 1746574329        | 1958        | 1957        | Oregon Passage                 | Oregon Passage                 | Landres, Paul                      | Paul Landres        | tt0052034        |
| 1746500546        | 1926        | 1926        | The Ridin' Rascal              | The Ridin' Rascal              | Smith, Clifford S.                 | Clifford Smith      | tt0017323        |
| 1746574384        | 1951        | 1951        | The Sword of Monte Cristo      | The Sword of Monte Cristo      | Geraghty, Maurice                  | Maurice Geraghty    | tt0044094        |
| 1746453887        | 1997        | 1997        | Meet Wally Sparks              | Meet Wally Sparks              | Baldwin, Peter                     | Peter Baldwin       | tt0119644        |
| 1746583172        | 1936        | 1936        | Sutter's Gold                  | Sutter's Gold                  | Cruze, James                       | James Cruze         | tt0028329        |
| 1746561379        | 1932        | 1932        | Jewel Robbery                  | Jewel Robbery                  | Dieterle, William                  | William Dieterle    | tt0023074        |
| 1746577442        | 1959        | 1959        | Attack of the Jungle Women     | Attack of the Jungle Women     | Juliano, Joseph R.                 | Joseph R. Juliano   | tt0052588        |
| 1746577601        | 1936        | 1936        | Anthony Adverse                | Anthony Adverse                | LeRoy, Mervyn                      | Mervyn LeRoy        | tt0027300        |



|            |      |      |                                  |                                  |                                     |                    |           |
|------------|------|------|----------------------------------|----------------------------------|-------------------------------------|--------------------|-----------|
| 1746533165 | 1915 | 1915 | The Cotton King                  | The Cotton King                  | Eagle, Oscar                        | Oscar Eagle        | tt0005140 |
| 1746584923 | 1940 | 1940 | Our Town                         | Our Town                         | Wood, Sam                           | Sam Wood           | tt0032881 |
| 1746569959 | 1957 | 1957 | 12 Angry Men                     | 12 Angry Men                     | Lumet, Sidney                       | Sidney Lumet       | tt0050083 |
| 1746530714 | 1950 | 1950 | I'll Get By                      | I'll Get By                      | Sale, Richard                       | Richard Sale       | tt0042589 |
| 1746583164 | 1937 | 1937 | Quality Street                   | Quality Street                   | Stevens, George                     | George Stevens     | tt0029454 |
| 1746492725 | 1947 | 1947 | Sepia Cinderella                 | Sepia Cinderella                 | Leonard, Arthur                     | Arthur H. Leonard  | tt0039812 |
| 1746512192 | 1915 | 1915 | The Ivory Snuff Box              | The Ivory Snuff Box              | Tourneur, Maurice                   | Maurice Tourneur   | tt0005558 |
| 1746486838 | 1918 | 1918 | The Wine Girl                    | The Wine Girl                    | Paton, Stuart                       | Stuart Paton       | tt0009815 |
| 1746570594 | 1934 | 1934 | Twenty Million Sweethearts       | Twenty Million Sweethearts       | Enright, Ray                        | Ray Enright        | tt0025920 |
| 1746569803 | 1956 | 1956 | Anything Goes                    | Anything Goes                    | Lewis, Robert                       | Robert Lewis       | tt0048954 |
| 1746524237 | 1916 | 1916 | Green Stockings                  | Green Stockings                  | North, Wilfrid                      | Wilfrid North      | tt0006742 |
| 1746410454 | 1991 | 1991 | Queens Logic                     | Queens Logic                     | Rash, Steve                         | Steve Rash         | tt0102741 |
| 1746570280 | 1952 | 1952 | Wait Till the Sun Shines, Nellie | Wait Till the Sun Shines, Nellie | King, Henry                         | Henry King         | tt0045307 |
| 1746566353 | 1956 | 1955 | Bride of the Monster             | Bride of the Monster             | Wood, Edward D.                     | Edward D. Wood Jr. | tt0047898 |
| 1746583284 | 1931 | 1931 | Law of the Rio Grande            | Law of the Rio Grande            | Sheldon, Forrest                    | Forrest Sheldon    | tt0022060 |
| 1746511790 | 1916 | 1916 | The Honor of Mary Blake          | The Honor of Mary Blake          | Stevens, Edwin                      | Edwin Stevens      | tt0006823 |
| 1745373770 | 2002 | 2002 | The Emperor's Club               | The Emperor's Club               | Hoffman, Michael                    | Michael Hoffman    | tt0283530 |
| 1746453611 | 1940 | 1940 | Flight Angels                    | Flight Angels                    | Seiler, Lewis                       | Lewis Seiler       | tt0032476 |
| 1746584457 | 1929 | 1929 | His First Command                | His First Command                | La Cava, Gregory                    | Gregory La Cava    | tt0019987 |
| 1746577882 | 1936 | 1936 | Federal Agent                    | Federal Agent                    | Newfield, Sam                       | Sam Newfield       | tt0027613 |
| 1746422035 | 1999 | 1999 | 200 Cigarettes                   | 200 Cigarettes                   | Bramon Garcia, Risa                 | Risa Bramon Garcia | tt0137338 |
| 1746571642 | 1932 | 1932 | Love Affair                      | Love Affair                      | Freeland, Thornton                  | Thornton Freeland  | tt0023153 |
| 1746581705 | 1951 | 1951 | The Kid from Amarillo            | The Kid from Amarillo            | Nazarro, Ray                        | Ray Nazarro        | tt0043708 |
| 1746491835 | 1947 | 1947 | Forever Amber                    | Forever Amber                    | Preminger, Otto                     | Otto Preminger     | tt0039391 |
| 1746210069 | 1970 | 1969 | The Belt and Suspenders Man      | The Belt and Suspenders Man      | Levy, Donald J.                     | Donald J. Levy     | tt2431590 |
| 1746563810 | 1952 | 1952 | The Merry Widow                  | The Merry Widow                  | Bernhardt, Curtis                   | Curtis Bernhardt   | tt0044900 |
| 1746576512 | 1931 | 1931 | Shipmates                        | Shipmates                        | Pollard, Harry                      | Harry A. Pollard   | tt0022376 |
| 1746562028 | 1953 | 1953 | The Great Jesse James Raid       | The Great Jesse James Raid       | Le Borg, Reginald                   | Reginald Le Borg   | tt0045840 |
| 1746583036 | 1939 | 1939 | Mesquite Buckaroo                | Mesquite Buckaroo                | Webb, Harry S.                      | Harry S. Webb      | tt0031639 |
| 1746555091 | 1954 | 1953 | Hondo                            | Hondo                            | Farrow, John                        | John Farrow        | tt0045883 |
| 1746576499 | 1932 | 1932 | One Hour with You                | One Hour with You                | Lubitsch, Ernst                     | George Cukor       | tt0023303 |
| 1746577320 | 1961 | 1961 | The Parent Trap                  | The Parent Trap                  | Swift, David                        | David Swift        | tt0055277 |
| 1746581354 | 1910 | 1910 | The Girl of the Northern Woods   | The Girl of the Northern Woods   | O'Neil, Barry                       | Barry O'Neil       | tt0343721 |
| 1746584648 | 1930 | 1930 | Rain or Shine                    | Rain or Shine                    | Capra, Frank                        | Frank Capra        | tt0021282 |
| 1769969562 | 1911 | 1911 | The Angel of Paradise Ranch      | The Angel of Paradise Ranch      |                                     | Allan Dwan         | tt0001478 |
| 1746453801 | 1943 | 1943 | Fighting Frontier                | Fighting Frontier                | Hillyer, Lambert                    | Lambert Hillyer    | tt0035874 |
| 1746208686 | 1968 | 1968 | Duffy                            | Duffy                            | Parrish, Robert                     | Robert Parrish     | tt0062917 |
| 1746423557 | 1996 | 1996 | Hamlet                           | Hamlet                           | Branagh, Kenneth                    | Kenneth Branagh    | tt0116477 |
| 1746570759 | 1933 | 1933 | Thrill Hunter                    | The Thrill Hunter                | Seitz, George B.                    | George B. Seitz    | tt0024665 |
| 1746576927 | 1962 | 1962 | The Seducers                     | The Seducers                     | Ferguson, Graeme                    | Graeme Ferguson    | tt0056462 |
| 1746232925 | 1967 | 1967 | Casino Royale                    | Casino Royale                    | Huston, John; Hughes, Ken; Guest, V | Ken Hughes         | tt0061452 |
| 1746577664 | 1933 | 1933 | Myrt and Marge                   | Myrt and Marge                   | Boasberg, Al                        | Al Boasberg        | tt0025542 |
| 1746491755 | 1946 | 1946 | Dirty Gertie from Harlem, U.S.A. | Dirty Gertie from Harlem U.S.A.  | Williams, Spencer                   | Spencer Williams   | tt0038480 |
| 1746436380 | 1941 | 1941 | Lucky Devils                     | Lucky Devils                     | Landers, Lew                        | Lew Landers        | tt0033855 |
| 1746514889 | 1922 | 1922 | Hills of Missing Men             | Hills of Missing Men             | McGowan, J. P.                      | J.P. McGowan       | tt0013236 |
| 1746492085 | 1948 | 1948 | Lulu Belle                       | Lulu Belle                       | Fenton, Leslie                      | Leslie Fenton      | tt0040555 |
| 1746569599 | 1957 | 1957 | The Wayward Girl                 | The Wayward Girl                 | Selander, Lesley                    | Lesley Selander    | tt0051183 |
| 1745357699 | 2008 | 2008 | The Rocker                       | The Rocker                       | Cattaneo, Peter                     | Peter Cattaneo     | tt1031969 |
| 1746561665 | 1932 | 1932 | No Living Witness                | No Living Witness                | Hopper, E. Mason                    | E. Mason Hopper    | tt0023276 |
| 1746438308 | 1944 | 1944 | My Gal Loves Music               | My Gal Loves Music               | Lilley, Edward                      | Edward C. Lilley   | tt0037110 |
| 1746567360 | 1932 | 1932 | But the Flesh Is Weak            | But the Flesh Is Weak            | Conway, Jack                        | Jack Conway        | tt0022731 |
| 1746582353 | 1929 | 1928 | Ned McCobb's Daughter            | Ned McCobb's Daughter            | Cowen, William J.                   | William J. Cowen   | tt0019205 |
| 1746582363 | 1950 | 1950 | The Underworld Story             | The Underworld Story             | Endfield, Cyril                     | Cy Endfield        | tt0043088 |
| 1746474981 | 1944 | 1944 | Henry Aldrich, Boy Scout         | Henry Aldrich, Boy Scout         | Bennett, Hugh                       | Hugh Bennett       | tt0036909 |
| 1746235701 | 1977 | 1977 | Ruby                             | Ruby                             | Harrington, Curtis                  | Curtis Harrington  | tt0076644 |
| 1746584395 | 1940 | 1940 | Torrid Zone                      | Torrid Zone                      | Keighley, William                   | William Keighley   | tt0033175 |
| 1746584330 | 1940 | 1940 | The Ghost Comes Home             | The Ghost Comes Home             | Thiele, William                     | Wilhelm Thiele     | tt0032521 |

|            |      |      |                                   |                                   |                              |                      |           |
|------------|------|------|-----------------------------------|-----------------------------------|------------------------------|----------------------|-----------|
| 1746580290 | 1938 | 1938 | Goodbye Broadway                  | Goodbye Broadway                  | McCarey, Ray                 | Ray McCarey          | tt0030197 |
| 1746504353 | 1918 | 1918 | A Daughter of the West            | A Daughter of the West            | Bertram, William             | William Bertram      | tt0191068 |
| 1746419760 | 1993 | 1993 | The Last Party                    | The Last Party                    | Benjamin, Mark ; Levin, Marc | Mark Benjamin        | tt0107372 |
| 1746566031 | 1953 | 1953 | Seminole                          | Seminole                          | Boetticher, Budd             | Budd Boetticher      | tt0046294 |
| 1746436547 | 1943 | 1943 | Hail to the Rangers               | Hail to the Rangers               | Berke, William               | William Berke        | tt0035961 |
| 1746501438 | 1915 | 1915 | His Wife                          | His Wife                          | Platt, George Foster         | George Foster Platt  | tt0005493 |
| 1745302773 | 2007 | 2007 | Starting Out in the Evening       | Starting Out in the Evening       | Wagner, Andrew               | Andrew Wagner        | tt0758784 |
| 1746578989 | 1950 | 1950 | Western Pacific Agent             | Western Pacific Agent             | Newfield, Sam                | Sam Newfield         | tt0043126 |
| 1746573821 | 1960 | 1960 | The Dark at the Top of the Stairs | The Dark at the Top of the Stairs | Mann, Delbert                | Delbert Mann         | tt0053750 |
| 1746555041 | 1957 | 1957 | Footsteps in the Night            | Footsteps in the Night            | Yarbrough, Jean              | Jean Yarbrough       | tt0050404 |
| 1746525196 | 1920 | 1920 | The Bromley Case                  | The Bromley Case                  | Wall, David                  | David Wall           | tt0187760 |
| 1746523344 | 1923 | 1923 | Anna Christie                     | Anna Christie                     | Wray, John Griffith          | John Griffith Wray   | tt0013834 |
| 1746455299 | 1997 | 1996 | Hard Eight                        | Hard Eight                        | Anderson, Paul Thomas        | Paul Thomas Anderson | tt0119256 |
| 1746580475 | 1935 | 1935 | Without Regret                    | Without Regret                    | Young, Harold                | Harold Young         | tt0027225 |
| 1746580778 | 1939 | 1939 | The Flying Deuces                 | The Flying Deuces                 | Sutherland, A. Edward        | A. Edward Sutherland | tt0031322 |
| 1746584347 | 1936 | 1936 | Phantom Patrol                    | Phantom Patrol                    | Hutchison, Charles           | Charles Hutchison    | tt0028098 |
| 1746582801 | 1935 | 1935 | The Girl from 10th Avenue         | The Girl from 10th Avenue         | Green, Alfred E.             | Alfred E. Green      | tt0026413 |
| 1746235618 | 1973 | 1973 | Wattstax                          | Wattstax                          | Stuart, Mel                  | Mel Stuart           | tt0070902 |
| 1746465247 | 1947 | 1947 | Heartaches                        | Heartaches                        | Wrangell, Basil              | Basil Wrangell       | tt0039452 |
| 1746520972 | 1950 | 1950 | Armored Car Robbery               | Armored Car Robbery               | Fleischer, Richard           | Richard Fleischer    | tt0042206 |
| 1746453502 | 1940 | 1940 | The Return of Wild Bill           | The Return of Wild Bill           | Lewis, Joseph H.             | Joseph H. Lewis      | tt0032984 |
| 1746219578 | 1971 | 1971 | The Hard Ride                     | The Hard Ride                     | Topper, Burt                 | Burt Topper          | tt0065815 |
| 1746581392 | 1961 | 1961 | Pagan Island                      | Pagan Island                      | Mahon, Barry                 | Barry Mahon          | tt0054154 |
| 1746524498 | 1910 | 1910 | Rose o' Salem-Town                | Rose o' Salem-Town                | Griffith, D. W.              | D.W. Griffith        | tt0001388 |
| 1745309389 | 2005 | 2005 | Racing Stripes                    | Racing Stripes                    | Du Chau, Frederik            | Frederik Du Chau     | tt0376105 |
| 1746420895 | 1996 | 1996 | Joe's Apartment                   | Joe's Apartment                   | Payson, John                 | John Payson          | tt0116707 |
| 1746492247 | 1948 | 1948 | On an Island with You             | On an Island with You             | Thorpe, Richard              | Richard Thorpe       | tt0040665 |
| 1746486840 | 1918 | 1918 | Once to Every Man                 | Once to Every Man                 | Hunter, T. Hayes             | T. Hayes Hunter      | tt0189862 |
| 1746577347 | 1951 | 1951 | Half Angel                        | Half Angel                        | Sale, Richard; Dassin, Jules | Richard Sale         | tt0043615 |
| 1745359638 | 2008 | 2008 | Hellboy II: The Golden Army       | Hellboy II: The Golden Army       | del Toro, Guillermo          | Guillermo del Toro   | tt0411477 |
| 1746454437 | 1940 | 1940 | A Night at Earl Carroll's         | A Night at Earl Carroll's         | Neumann, Kurt                | Kurt Neumann         | tt0032843 |
| 1746393644 | 1988 | 1988 | Phantasm II                       | Phantasm II                       | Coscarelli, Don              | Don Coscarelli       | tt0095863 |
| 1746583355 | 1930 | 1930 | Those Who Dance                   | Those Who Dance                   | Beaudine, William            | William Beaudine     | tt0021471 |
| 1746424585 | 1942 | 1942 | Street of Chance                  | Street of Chance                  | Hively, Jack                 | Jack Hively          | tt0035388 |
| 1746562461 | 1953 | 1953 | The Moonlighter                   | The Moonlighter                   | Rowland, Roy                 | Roy Rowland          | tt0046095 |
| 1746532731 | 1916 | 1916 | The Girl Who Doesn't Know         | The Girl Who Doesn't Know         | Bartlett, Charles E.         | Charles Bartlett     | tt0157698 |
| 1746554762 | 1965 | 1965 | Across the River                  | Across the River                  | Sharff, Stefan               | Stefan Sharff        | tt0164319 |
| 1746574461 | 1934 | 1934 | Servants' Entrance                | Servants' Entrance                | Lloyd, Frank                 | Frank Lloyd          | tt0025766 |
| 1746571071 | 1934 | 1934 | Sing and Like It                  | Sing and Like It                  | Seiter, William A.           | William A. Seiter    | tt0025797 |
| 1746584156 | 1935 | 1935 | Three Kids and a Queen            | Three Kids and a Queen            | Ludwig, Edward               | Edward Ludwig        | tt0027096 |
| 1746571831 | 1932 | 1932 | Freaks                            | Freaks                            | Browning, Tod                | Tod Browning         | tt0022913 |
| 1746577026 | 1963 | 1963 | The Best of Cinerama              | Best of Cinerama                  |                              |                      | tt0055789 |
| 1746474507 | 1944 | 1944 | Youth Runs Wild                   | Youth Runs Wild                   | Robson, Mark                 | Mark Robson          | tt0037476 |
| 1746419395 | 1992 | 1992 | 3 Ninjas                          | 3 Ninjas                          | Turteltaub, Jon              | Jon Turteltaub       | tt0103596 |
| 1746584283 | 1935 | 1935 | Texas Terror                      | Texas Terror                      | Bradbury, R. N.              | Robert N. Bradbury   | tt0027087 |
| 1746582540 | 1936 | 1936 | Hell-Ship Morgan                  | Hell Ship Morgan                  | Lederman, D. Ross            | D. Ross Lederman     | tt0027731 |
| 1746437395 | 1941 | 1941 | Blood and Sand                    | Blood and Sand                    | Mamoulian, Rouben            | Rouben Mamoulian     | tt0033405 |
| 1746198261 | 1969 | 1969 | Frustrated Cherie                 | Frustrated Cherie                 | Dean, Arthur                 | Arthur Dean          | tt0137619 |
| 1746524026 | 1912 | 1912 | At It Again                       | At It Again                       | Sennett, Mack                | Mack Sennett         | tt0002036 |
| 1746582950 | 1935 | 1935 | Broadway Melody of 1936           | Broadway Melody of 1936           | Del Ruth, Roy                | Roy Del Ruth         | tt0026144 |
| 1746491981 | 1945 | 1945 | Marked for Murder                 | Marked for Murder                 | Clifton, Elmer               | Elmer Clifton        | tt0037901 |
| 1746467707 | 1917 | 1917 | The Clock                         | The Clock                         | Worthington, William         | William Worthington  | tt0007805 |
| 1746408631 | 1989 | 1988 | Red Scorpion                      | Red Scorpion                      | Zito, Joseph                 | Joseph Zito          | tt0098180 |
| 1746233004 | 1970 | 1970 | Fandango                          | Fandango                          | Hayes, John                  | John Hayes           | tt0121266 |
| 1769969883 | 1911 | 1911 | The Pied Piper of Hamelin         | The Pied Piper of Hamelin         |                              | Theodore Marston     | tt0001831 |
| 1746523070 | 1914 | 1914 | The Marked Woman                  | The Marked Woman                  | Lund, O. A. C.               | O.A.C. Lund          | tt0004304 |
| 1746574429 | 1951 | 1951 | Hollywood Story                   | Hollywood Story                   | Castle, William              | William Castle       | tt0043646 |

|                   |             |             |                                                  |                                              |                                      |                       |                  |
|-------------------|-------------|-------------|--------------------------------------------------|----------------------------------------------|--------------------------------------|-----------------------|------------------|
| 1746584868        | 1939        | 1939        | Television Spy                                   | Television Spy                               | Dmytryk, Edward                      | Edward Dmytryk        | tt0032009        |
| 1746582911        | 1936        | 1936        | Don't Gamble with Love                           | Don't Gamble with Love                       | Murphy, Dudley                       | Dudley Murphy         | tt0027534        |
| 1746576902        | 1932        | 1932        | Hidden Valley                                    | Hidden Valley                                | Bradbury, Robert N.                  | Robert N. Bradbury    | tt0023005        |
| 1746577025        | 1961        | 1961        | The Misfits                                      | The Misfits                                  | Huston, John                         | John Huston           | tt0055184        |
| 1746584446        | 1931        | 1931        | The Mad Parade                                   | The Mad Parade                               | Beaudine, William                    | William Beaudine      | tt0148436        |
| 1746581888        | 1951        | 1951        | Submarine Command                                | Submarine Command                            | Farrow, John                         | John Farrow           | tt0044085        |
| 1746512845        | 1916        | 1916        | The Man from Nowhere                             | The Man from Nowhere                         | Otto, Henry                          | Henry Otto            | tt0007025        |
| <b>1746577629</b> | <b>1935</b> | <b>1935</b> | <b>The Three Musketeers</b>                      | <b>The Three Musketeers</b>                  | <b>Lee, Rowland V.</b>               | <b>Rowland V. Lee</b> | <b>tt0027099</b> |
| 1746580426        | 1935        | 1935        | Happiness C.O.D.                                 | Happiness C.O.D.                             | Lamont, Charles                      | Charles Lamont        | tt0026453        |
| 1769971139        | 1969        | 1969        | Swingtail                                        | Swingtail                                    | Shane, Dave                          | Dave Shane            | tt0259021        |
| 1746574725        | 1935        | 1935        | Here Comes the Band                              | Here Comes the Band                          | Sloane, Paul                         | Paul Sloane           | tt0026466        |
| 1746583442        | 1928        | 1928        | The Wright Idea                                  | The Wright Idea                              | Hines, Charles                       | Charles Hines         | tt0019597        |
| 1746233631        | 1968        | 1968        | Planet of the Apes                               | Planet of the Apes                           | Schaffner, Franklin J.               | Franklin J. Schaffner | tt0063442        |
| 1746235385        | 1972        | 1972        | Dealing: Or the Berkeley-to-Boston Forty-Brick L | Dealing: Or the Berkeley to Boston Forty Bri | Williams, Paul                       | Paul Williams         | tt0068455        |
| 1746577861        | 1937        | 1937        | The Red Rope                                     | The Red Rope                                 | Luby, S. Roy                         | S. Roy Luby           | tt0029473        |
| 1746562050        | 1956        | 1956        | Strange Intruder                                 | Strange Intruder                             | Rapper, Irving                       | Irving Rapper         | tt0049805        |
| 1746520960        | 1950        | 1950        | Dynamite Pass                                    | Dynamite Pass                                | Landers, Lew                         | Lew Landers           | tt0042425        |
| 1746435163        | 1940        | 1940        | Laddie                                           | Laddie                                       | Hively, Jack                         | Jack Hively           | tt0032683        |
| 1746574835        | 1937        | 1937        | Empty Holsters                                   | Empty Holsters                               | Eason, B. Reeves                     | B. Reeves Eason       | tt0028830        |
| 1746582787        | 1936        | 1936        | Desert Justice                                   | Desert Justice                               | Williams, Lester                     | William Berke         | tt0027513        |
| 1746583479        | 1951        | 1951        | Wells Fargo Gunmaster                            | Wells Fargo Gunmaster                        | Ford, Philip                         | Philip Ford           | tt0044203        |
| 1746577611        | 1937        | 1937        | As Good As Married                               | As Good as Married                           | Buzzell, Edward                      | Edward Buzzell        | tt0028588        |
| 1746569828        | 1958        | 1958        | Andy Hardy Comes Home                            | Andy Hardy Comes Home                        | Koch, Howard W.                      | Howard W. Koch        | tt0051360        |
| 1746566726        | 1932        | 1931        | Manhattan Parade                                 | Manhattan Parade                             | Bacon, Lloyd                         | Lloyd Bacon           | tt0022120        |
| 1746474803        | 1948        | 1948        | Night Time in Nevada                             | Night Time in Nevada                         | Witney, William                      | William Witney        | tt0040644        |
| 1746569800        | 1956        | 1956        | The First Traveling Saleslady                    | The First Traveling Saleslady                | Lubin, Arthur                        | Arthur Lubin          | tt0049212        |
| 1746583579        | 1930        | 1930        | The Dancers                                      | The Dancers                                  | Sprague, Chandler                    | Chandler Sprague      | tt0020804        |
| 1746508606        | 1950        | 1950        | Comanche Territory                               | Comanche Territory                           | Sherman, George                      | George Sherman        | tt0042339        |
| 1746582263        | 1930        | 1930        | Paramount on Parade                              | Paramount on Parade                          | Arzner, Dorothy; Brower, Otto; Goul  | Dorothy Arzner        | tt0021232        |
| 1746421317        | 1995        | 1995        | Desperado                                        | Desperado                                    | Rodriguez, Robert                    | Robert Rodriguez      | tt0112851        |
| 1746474136        | 1945        | 1945        | Shadow of Terror                                 | Shadow of Terror                             | Landers, Lew                         | Lew Landers           | tt0038077        |
| 1746513805        | 1916        | 1916        | Madame La Presidente                             | Madame la Presidente                         | Lloyd, Frank                         | Frank Lloyd           | tt0007000        |
| 1746579060        | 1950        | 1950        | Where Danger Lives                               | Where Danger Lives                           | Farrow, John                         | John Farrow           | tt0043131        |
| 1746574757        | 1935        | 1935        | Rough Riding Ranger                              | Rough Riding Ranger                          | Clifton, Elmer                       | Elmer Clifton         | tt0026952        |
| 1746394416        | 1993        | 1993        | Bopha!                                           | Bopha!                                       | Freeman, Morgan                      | Morgan Freeman        | tt0106464        |
| 1746424608        | 1940        | 1940        | West of Pinto Basin                              | West of Pinto Basin                          | Luby, S. Roy                         | S. Roy Luby           | tt0033251        |
| 1746582888        | 1938        | 1938        | Dramatic School                                  | Dramatic School                              | Sinclair, Robert B.                  | Robert B. Sinclair    | tt0030079        |
| 1746500279        | 1948        | 1948        | Escape                                           | Escape                                       | Mankiewicz, Joseph L.                | Joseph L. Mankiewicz  | tt0040325        |
| 1746464975        | 1946        | 1946        | Temptation                                       | Temptation                                   | Pichel, Irving                       | Irving Pichel         | tt0039015        |
| 1746560792        | 1932        | 1932        | The Reckoning                                    | The Reckoning                                | Fraser, Harry                        | Harry L. Fraser       | tt0023381        |
| 1746553454        | 1964        | 1964        | The Shepherd of the Hills                        | The Shepherd of the Hills                    | Parker, Ben                          | Ben Parker            | tt0057492        |
| 1746454078        | 1941        | 1941        | Tillie the Toiler                                | Tillie the Toiler                            | Salkow, Sidney                       | Sidney Salkow         | tt0034294        |
| 1746466834        | 1917        | 1917        | High Speed                                       | High Speed                                   | Sargent, George L.; Clifton, Elmer   | George L. Sargent     | tt0008096        |
| 1746580967        | 1910        | 1910        | Happy Jack, a Hero                               | Happy Jack, a Hero                           | Powell, Frank                        | Frank Powell          | tt0362703        |
| 1745309128        | 2005        | 2005        | Son of the Mask                                  | Son of the Mask                              | Guterman, Lawrence                   | Lawrence Guterman     | tt0362165        |
| 1746513193        | 1922        | 1922        | I Am the Law                                     | I Am the Law                                 | Carewe, Edwin                        | Edwin Carewe          | tt0013259        |
| 1746501196        | 1915        | 1915        | The Impostor                                     | The Impostor                                 | Capellani, Albert                    | Albert Capellani      | tt0005537        |
| 1746524490        | 1922        | 1922        | For Big Stakes                                   | For Big Stakes                               | Reynolds, Lynn                       | Lynn Reynolds         | tt0013143        |
| 1746235576        | 1976        | 1976        | Hot Potato                                       | Hot Potato                                   | Williams, Oscar                      | Oscar Williams        | tt0074646        |
| 1746439990        | 1995        | 1995        | Something to Talk About                          | Something to Talk About                      | Hallström, Lasse                     | Lasse Hallström       | tt0114496        |
| 1745374721        | 2004        | 2003        | Frankie and Johnny Are Married                   | Frankie and Johnny Are Married               | Pressman, Michael                    | Michael Pressman      | tt0400446        |
| 1746564495        | 1952        | 1952        | Storm over Tibet                                 | Storm Over Tibet                             | Marton, Andrew                       | Andrew Marton         | tt0045196        |
| 1746577155        | 1950        | 1950        | Right Cross                                      | Right Cross                                  | Sturges, John                        | John Sturges          | tt0042894        |
| 1746580324        | 1937        | 1937        | John Meade's Woman                               | John Meade's Woman                           | Wallace, Richard                     | Richard Wallace       | tt0029069        |
| 1746502311        | 1915        | 1915        | Regeneration                                     | Regeneration                                 | Walsh, R. A.                         | Raoul Walsh           | tt0005960        |
| 1746580884        | 1936        | 1936        | The Bohemian Girl                                | The Bohemian Girl                            | Horne, James W.; Rogers, Charles; Rc | James W. Horne        | tt0027376        |
| 1746198125        | 1966        | 1965        | Kitchen                                          | Kitchen                                      | Warhol, Andy                         | Andy Warhol           | tt0190508        |

|                   |             |             |                                    |                                    |                                 |                        |                  |
|-------------------|-------------|-------------|------------------------------------|------------------------------------|---------------------------------|------------------------|------------------|
| 1746499866        | 1947        | 1947        | Brute Force                        | Brute Force                        | Dassin, Jules                   | Jules Dassin           | tt0039224        |
| 1745372869        | 2003        | 2003        | Dreamcatcher                       | Dreamcatcher                       | Kasdan, Lawrence                | Lawrence Kasdan        | tt0285531        |
| 1746409505        | 1990        | 1990        | My Blue Heaven                     | My Blue Heaven                     | Ross, Herbert                   | Herbert Ross           | tt0100212        |
| 1746504137        | 1921        | 1921        | The Highest Law                    | The Highest Law                    | Ince, Ralph                     | Ralph Ince             | tt0012280        |
| 1746508504        | 1925        | 1925        | My Lady's Lips                     | My Lady's Lips                     | Hogan, James P.                 | James P. Hogan         | tt0016134        |
| 1746565893        | 1955        | 1955        | The Prodigal                       | The Prodigal                       | Thorpe, Richard                 | Richard Thorpe         | tt0048517        |
| 1745342450        | 2004        | 2004        | L.A. Twister                       | L.A. Twister                       | Pape, Sven                      | Sven Pape              | tt0347368        |
| 1746509553        | 1925        | 1925        | Introduce Me                       | Introduce Me                       | Crone, George J.                | George Crone           | tt0015949        |
| 1746574930        | 1935        | 1935        | Skull and Crown                    | Skull and Crown                    | Clifton, Elmer                  | Elmer Clifton          | tt0027007        |
| 1746235046        | 1973        | 1973        | Invasion of the Bee Girls          | Invasion of the Bee Girls          | Sanders, Denis                  | Denis Sanders          | tt0070222        |
| 1746235012        | 1980        | 1980        | The Last Married Couple in America | The Last Married Couple in America | Cates, Gilbert                  | Gilbert Cates          | tt0081032        |
| 1746198719        | 1969        | 1969        | Medium Cool                        | Medium Cool                        | Wexler, Haskell                 | Haskell Wexler         | tt0064652        |
| 1746564755        | 1952        | 1952        | The Pace That Thrills              | The Pace That Thrills              | Barsha, Leon                    | Leon Barsha            | tt0045006        |
| 1746507736        | 1927        | 1927        | Stolen Pleasures                   | Stolen Pleasures                   | Rosen, Philip E.                | Phil Rosen             | tt0018448        |
| 1746455566        | 1998        | 1998        | The Faculty                        | The Faculty                        | Rodriguez, Robert               | Robert Rodriguez       | tt0133751        |
| 1746555906        | 1955        | 1955        | Foxfire                            | Foxfire                            | Pevney, Joseph                  | Joseph Pevney          | tt0048091        |
| 1746513630        | 1914        | 1914        | Captain Swift                      | Captain Swift                      | Lewis, Edgar                    | Edgar Lewis            | tt0003752        |
| 1746580446        | 1938        | 1938        | Outside of Paradise                | Outside of Paradise                | Auer, John H.                   | John H. Auer           | tt0030540        |
| 1745342041        | 2008        | 2008        | The Express                        | The Express                        | Fleder, Gary                    | Gary Fleder            | tt0469903        |
| 1746584659        | 1929        | 1929        | Idaho Red                          | Idaho Red                          | De Lacey, Robert                | Robert De Lacey        | tt0020013        |
| 1746209629        | 1967        | 1967        | Hell on Wheels                     | Hell on Wheels                     | Zens, Will                      | Will Zens              | tt0061757        |
| 1746434852        | 1998        | 1997        | Niagara, Niagara                   | Niagara, Niagara                   | Gosse, Bob                      | Bob Gosse              | tt0119780        |
| 1745271666        | 2001        | 2001        | Crazy/Beautiful                    | Crazy/Beautiful                    | Stockwell, John                 | John Stockwell         | tt0250224        |
| 1746570391        | 1934        | 1934        | What Every Woman Knows             | What Every Woman Knows             | La Cava, Gregory                | Gregory La Cava        | tt0025973        |
| 1746568342        | 1952        | 1952        | Carbine Williams                   | Carbine Williams                   | Thorpe, Richard                 | Richard Thorpe         | tt0044480        |
| 1769971147        | 1969        | 1969        | Sisters in Leather                 | Sisters in Leather                 | Crilly, Spence                  | Zoltan G. Spencer      | tt0064991        |
| 1746508103        | 1950        | 1950        | Jiggs and Maggie Out West          | Jiggs and Maggie Out West          | Beaudine, William               | William Beaudine       | tt0042615        |
| 1746566105        | 1954        | 1954        | Man with a Million                 | Man with a Million                 | Neame, Ronald                   | Ronald Neame           | tt0046072        |
| 1746579049        | 1960        | 1960        | Why Must I Die?                    | Why Must I Die?                    | Del Ruth, Roy                   | Roy Del Ruth           | tt0054474        |
| 1746571967        | 1931        | 1931        | The White Renegade                 | White Renegade                     | Irwin, Jack                     | Jack Irwin             | tt0022557        |
| 1746583647        | 1928        | 1928        | Freckles                           | Freckles                           | Meehan, Leo                     | James Leo Meehan       | tt0018915        |
| 1746501290        | 1916        | 1916        | Overalls                           | Overalls                           | Halloway, Jack                  | Jack Halloway          | tt0163135        |
| 1746566078        | 1953        | 1953        | Scandal at Scourie                 | Scandal at Scourie                 | Negulesco, Jean                 | Jean Negulesco         | tt0046279        |
| 1746585354        | 1930        | 1930        | The Man From Blankley's            | The Man from Blankley's            | Green, Alfred E.                | Alfred E. Green        | tt0021115        |
| 1746520247        | 1925        | 1925        | Warrior Gap                        | Warrior Gap                        | Neitz, Alvin J.                 | Alan James             | tt0177353        |
| 1746454111        | 1998        | 1998        | Can't Hardly Wait                  | Can't Hardly Wait                  | Elfont, Harry ; Kaplan, Deborah | Harry Elfont           | tt0127723        |
| 1746563873        | 1952        | 1951        | Another Man's Poison               | Another Man's Poison               | Rapper, Irving                  | Irving Rapper          | tt0044364        |
| 1746420234        | 1988        | 1988        | Bull Durham                        | Bull Durham                        | Shelton, Ron                    | Ron Shelton            | tt0094812        |
| 1746532740        | 1928        | 1928        | Ladies of the Night Club           | Ladies of the Night Club           | Archainbaud, George             | George Archainbaud     | tt0019063        |
| 1746555713        | 1954        | 1954        | Pride of the Blue Grass            | Pride of the Blue Grass            | Beaudine, William               | William Beaudine       | tt0047363        |
| 1746569874        | 1958        | 1958        | Gigi                               | Gigi                               | Minnelli, Vincente              | Vincente Minnelli      | tt0051658        |
| 1746582890        | 1938        | 1938        | Orphans of the Street              | Orphans of the Street              | Auer, John H.                   | John H. Auer           | tt0030532        |
| 1746464839        | 1945        | 1945        | Man Alive                          | Man Alive                          | Enright, Ray                    | Ray Enright            | tt0037892        |
| 1746501638        | 1910        | 1910        | The Marked Time-Table              | The Marked Time Table              | Griffith, D. W.                 | D.W. Griffith          | tt0001307        |
| 1746566291        | 1953        | 1953        | Port Sinister                      | Port Sinister                      | Daniels, Harold                 | Harold Daniels         | tt0046199        |
| 1746514654        | 1922        | 1922        | In the Name of the Law             | In the Name of the Law             | Johnson, Emory                  | Emory Johnson          | tt0013266        |
| 1746439092        | 1995        | 1995        | Forget Paris                       | Forget Paris                       | Crystal, Billy                  | Billy Crystal          | tt0113097        |
| 1746577313        | 1958        | 1957        | Uncle Vanya                        | Uncle Vanya                        | Goetz, John                     | John Goetz             | tt0052335        |
| 1746454939        | 1995        | 1995        | Waiting to Exhale                  | Waiting to Exhale                  | Whitaker, Forest                | Forest Whitaker        | tt0114885        |
| 1746569844        | 1957        | 1957        | The Halliday Brand                 | The Halliday Brand                 | Lewis, Joseph H.                | Joseph H. Lewis        | tt0050481        |
| <b>1746571065</b> | <b>1934</b> | <b>1934</b> | <b>The White Parade</b>            | <b>The White Parade</b>            | <b>Cummings, Irving</b>         | <b>Irving Cummings</b> | <b>tt0025986</b> |
| 1746453792        | 1943        | 1943        | The Purple V                       | The Purple V                       | Sherman, George                 | George Sherman         | tt0036281        |
| 1746578702        | 1951        | 1950        | Counterspy Meets Scotland Yard     | Counterspy Meets Scotland Yard     | Friedman, Seymour               | Seymour Friedman       | tt0178348        |
| 1746570982        | 1952        | 1952        | The Lion and the Horse             | The Lion and the Horse             | King, Louis                     | Louis King             | tt0044838        |
| 1745342703        | 2001        | 2001        | Domestic Disturbance               | Domestic Disturbance               | Becker, Harold                  | Harold Becker          | tt0249478        |
| 1746509522        | 1925        | 1925        | Flash o' Lightning                 | Flash o' Lightning                 | Maloney, Leo                    | Leo D. Maloney         | tt0132961        |
| 1746514790        | 1923        | 1922        | Thirty Days                        | Thirty Days                        | Cruze, James                    | James Cruze            | tt0013669        |

|            |      |      |                                 |                                 |                               |                       |           |
|------------|------|------|---------------------------------|---------------------------------|-------------------------------|-----------------------|-----------|
| 1746393782 | 1991 | 1991 | Rush                            | Rush                            | Zanuck, Lili Fini             | Lili Fini Zanuck      | tt0102820 |
| 1746507744 | 1950 | 1950 | Gun Crazy                       | Gun Crazy                       | Lewis, Joseph H.              | Joseph H. Lewis       | tt0042530 |
| 1746583475 | 1931 | 1931 | Dugan of the Bad Lands          | Dugan of the Badlands           | Bradbury, Robert North        | Robert N. Bradbury    | tt0021822 |
| 1746474818 | 1945 | 1945 | Pan-Americana                   | Pan Americana                   | Auer, John H.                 | John H. Auer          | tt0037970 |
| 1746577094 | 1959 | 1959 | Yellowstone Kelly               | Yellowstone Kelly               | Douglas, Gordon               | Gordon Douglas        | tt0053457 |
| 1746492740 | 1947 | 1947 | Joe Palooka in the Knockout     | Joe Palooka in the Knockout     | LeBorg, Reginald              | Reginald Le Borg      | tt0039514 |
| 1746561651 | 1932 | 1933 | He Learned About Women          | He Learned About Women          | Corrigan, Lloyd               | Lloyd Corrigan        | tt0024095 |
| 1746433938 | 1991 | 1991 | Robin Hood: Prince of Thieves   | Robin Hood: Prince of Thieves   | Reynolds, Kevin               | Kevin Reynolds        | tt0102798 |
| 1746454472 | 1999 | 1999 | The Deep End of the Ocean       | The Deep End of the Ocean       | Grosbard, Ulu                 | Ulu Grosbard          | tt0120646 |
| 1746566172 | 1954 | 1953 | Cease Fire                      | Cease Fire!                     | Crump, Owen                   | Owen Crump            | tt0045616 |
| 1746467827 | 1917 | 1917 | Alimony                         | Alimony                         | Flynn, Emmett J.              | Emmett J. Flynn       | tt0007623 |
| 1746419315 | 1940 | 1940 | Carolina Moon                   | Carolina Moon                   | McDonald, Frank               | Frank McDonald        | tt0032311 |
| 1746423750 | 1989 | 1989 | Little Monsters                 | Little Monsters                 | Greenberg, Richard Alan       | Richard Greenberg     | tt0097758 |
| 1745293167 | 2006 | 2006 | Conversations with God          | Conversations with God          | Simon, Stephen                | Stephen Deutsch       | tt0489682 |
| 1746568004 | 1933 | 1933 | College Coach                   | College Coach                   | Wellman, William A.           | William A. Wellman    | tt0023899 |
| 1746486861 | 1918 | 1918 | Which Woman?                    | Which Woman?                    | Browning, Tod; Pollard, Harry | Tod Browning          | tt0009793 |
| 1746436568 | 1943 | 1943 | Aerial Gunner                   | Aerial Gunner                   | Pine, William H.              | William H. Pine       | tt0035614 |
| 1746198685 | 1969 | 1969 | The Reivers                     | The Reivers                     | Rydell, Mark                  | Mark Rydell           | tt0064886 |
| 1746520830 | 1950 | 1950 | The Big Hangover                | The Big Hangover                | Krasna, Norman                | Norman Krasna         | tt0042247 |
| 1746580253 | 1934 | 1934 | Wild Gold                       | Wild Gold                       | Marshall, George              | George Marshall       | tt0025992 |
| 1746578813 | 1962 | 1962 | Premature Burial                | Premature Burial                | Corman, Roger                 | Roger Corman          | tt0056368 |
| 1746499916 | 1945 | 1945 | You Came Along                  | You Came Along                  | Farrow, John                  | John Farrow           | tt0038263 |
| 1746524819 | 1915 | 1915 | The Wheels of Justice           | The Wheels of Justice           | Marston, Theodore             | Theodore Marston      | tt0006257 |
| 1746424430 | 1943 | 1943 | The North Star                  | The North Star                  | Milestone, Lewis              | Lewis Milestone       | tt0036217 |
| 1745271781 | 2000 | 2000 | Trixie                          | Trixie                          | Rudolph, Alan                 | Alan Rudolph          | tt0162711 |
| 1746523436 | 1910 | 1910 | The Sorrows of the Unfaithful   | The Sorrows of the Unfaithful   | Griffith, D. W.               | D.W. Griffith         | tt0001401 |
| 1746420883 | 1996 | 1996 | To Gillian on Her 37th Birthday | To Gillian on Her 37th Birthday | Pressman, Michael             | Michael Pressman      | tt0117924 |
| 1746410739 | 1994 | 1994 | In the Army Now                 | In the Army Now                 | Petrie, Daniel                | Daniel Petrie Jr.     | tt0110123 |
| 1746454011 | 1943 | 1943 | The Return of the Vampire       | The Return of the Vampire       | Landers, Lew                  | Lew Landers           | tt0037219 |
| 1746498472 | 1921 | 1921 | The Supreme Passion             | The Supreme Passion             | Bradley, Samuel               | Samuel R. Bradley     | tt0167428 |
| 1746578764 | 1960 | 1960 | September Storm                 | September Storm                 | Haskin, Byron                 | Byron Haskin          | tt0054290 |
| 1746575067 | 1938 | 1938 | Law of the Texan                | Law of the Texan                | Clifton, Elmer                | Elmer Clifton         | tt0030352 |
| 1746487852 | 1918 | 1918 | The Rainbow Trail               | The Rainbow Trail               | Lloyd, Frank                  | Frank Lloyd           | tt0009532 |
| 1745309463 | 2007 | 2007 | Darfur Now                      | Darfur Now                      | Braun, Theodore               | Ted Braun             | tt0988102 |
| 1746394004 | 1989 | 1989 | Worth Winning                   | Worth Winning                   | Mackenzie, Will               | Will Mackenzie        | tt0098678 |
| 1746583757 | 1931 | 1931 | A Connecticut Yankee            | A Connecticut Yankee            | Butler, David                 | David Butler          | tt0021759 |
| 1746455861 | 1999 | 1998 | Desert Blue                     | Desert Blue                     | Freeman, Morgan J.            | Morgan J. Freeman     | tt0126261 |
| 1746550192 | 1955 | 1955 | The Return of Jack Slade        | The Return of Jack Slade        | Schuster, Harold              | Harold D. Schuster    | tt0048552 |
| 1746423325 | 1999 | 1999 | Ed TV                           | Ed TV                           | Howard, Ron                   | Ron Howard            | tt0131369 |
| 1746582730 | 1935 | 1935 | Mississippi                     | Mississippi                     | Sutherland, A. Edward         | A. Edward Sutherland  | tt0026723 |
| 1746271146 | 1980 | 1980 | The Shining                     | The Shining                     | Kubrick, Stanley              | Stanley Kubrick       | tt0081505 |
| 1746436333 | 1943 | 1942 | Hitler--Dead or Alive           | Hitler Dead or Alive            | Grinde, Nick                  | Nick Grinde           | tt0034857 |
| 1746421004 | 1993 | 1993 | Sleepless in Seattle            | Sleepless in Seattle            | Ephron, Nora                  | Nora Ephron           | tt0108160 |
| 1746454950 | 1941 | 1941 | Where Did You Get That Girl?    | Where Did You Get That Girl?    | Lubin, Arthur                 | Arthur Lubin          | tt0034388 |
| 1746582415 | 1937 | 1937 | Doomed at Sundown               | Doomed at Sundown               | Newfield, Sam                 | Sam Newfield          | tt0028802 |
| 1745272199 | 2000 | 2000 | The Way of the Gun              | The Way of the Gun              | McQuarrie, Christopher        | Christopher McQuarrie | tt0202677 |
| 1746582456 | 1937 | 1937 | Wild Money                      | Wild Money                      | King, Louis                   | Louis King            | tt0029777 |
| 1746258156 | 1976 | 1976 | The Gumball Rally               | The Gumball Rally               | Bail, Chuck                   | Charles Bail          | tt0074597 |
| 1746567982 | 1933 | 1933 | Murder on the Campus            | Murder on the Campus            | Thorpe, Richard               | Richard Thorpe        | tt0025533 |
| 1746580566 | 1937 | 1936 | Polygamy                        | Polygamy                        | Carlyle, Patrick              | Pat Carlyle           | tt0031475 |
| 1746580760 | 1937 | 1937 | The Law Commands                | The Law Commands                | Nigh, William                 | William Nigh          | tt0029122 |
| 1746420120 | 1988 | 1988 | Ernest Saves Christmas          | Ernest Saves Christmas          | Cherry, John                  | John R. Cherry III    | tt0095107 |
| 1746464932 | 1943 | 1943 | Stage Door Canteen              | Stage Door Canteen              | Borzage, Frank                | Frank Borzage         | tt0036384 |
| 1746424458 | 1941 | 1941 | Scattergood Meets Broadway      | Scattergood Meets Broadway      | Cabanne, Christy              | Christy Cabanne       | tt0033401 |
| 1746514763 | 1916 | 1916 | Silas Marner                    | Silas Marner                    | Warde, Ernest                 | Ernest C. Warde       | tt0012684 |
| 1746513651 | 1915 | 1915 | The Climbers                    | The Climbers                    | O'Neil, Barry                 | Barry O'Neil          | tt0005101 |
| 1746475985 | 1945 | 1945 | High Powered                    | High Powered                    | Berke, William                | William Berke         | tt0037777 |

|            |      |      |                                                  |                                                  |                               |                      |           |
|------------|------|------|--------------------------------------------------|--------------------------------------------------|-------------------------------|----------------------|-----------|
| 1746582689 | 1934 | 1934 | Beyond the Law                                   | Beyond the Law                                   | Lederman, D. Ross             | D. Ross Lederman     | tt0024884 |
| 1769971088 | 1969 | 1968 | Odd Triangle                                     | Odd Triangle                                     | Sarno, Joseph W.              | Joseph W. Sarno      | tt0063375 |
| 1745282670 | 2006 | 2005 | The Mostly Unfabulous Social Life of Ethan Green | The Mostly Unfabulous Social Life of Ethan Green | Bamber, George                | George Bamber        | tt0424287 |
| 1746260483 | 1980 | 1980 | The Nude Bomb                                    | The Nude Bomb                                    | Donner, Clive                 | Clive Donner         | tt0081249 |
| 1746580478 | 1935 | 1935 | Special Agent                                    | Special Agent                                    | Keighley, William             | William Keighley     | tt0027029 |
| 1746502270 | 1917 | 1917 | The Rainbow Girl                                 | The Rainbow Girl                                 | Sturgeon, Rollin S.           | Rollin S. Sturgeon   | tt0008492 |
| 1746560491 | 1932 | 1932 | Roar of the Dragon                               | Roar of the Dragon                               | Ruggles, Wesley               | Wesley Ruggles       | tt0023407 |
| 1746394177 | 1985 | 1984 | The Mutilator                                    | The Mutilator                                    | Cooper, Buddy                 | Buddy Cooper         | tt0124014 |
| 1746439216 | 1997 | 1997 | Breakdown                                        | Breakdown                                        | Mostow, Jonathan              | Jonathan Mostow      | tt0118771 |
| 1746435857 | 2000 | 2000 | Frequency                                        | Frequency                                        | Hoblit, Gregory               | Gregory Hoblit       | tt0186151 |
| 1746248850 | 1974 | 1974 | The Take                                         | Axe                                              | Hartford-Davis, Robert        | Frederick R. Friedel | tt0075710 |
| 1746570828 | 1934 | 1934 | The Mystery of Mr. X                             | The Mystery of Mr. X                             | Selwyn, Edgar                 | Edgar Selwyn         | tt0025546 |
| 1746580307 | 1935 | 1935 | Paradise Canyon                                  | Paradise Canyon                                  | Pierson, Carl L.              | Carl Pierson         | tt0026846 |
| 1745303097 | 2007 | 2007 | Illegal Tender                                   | Illegal Tender                                   | Reyes, Franc.                 | Franc. Reyes         | tt0775488 |
| 1769970757 | 1912 | 1912 | The Rivals                                       | The Rivals                                       |                               | Mack Sennett         | tt0002464 |
| 1746516314 | 1922 | 1922 | Wildcat Jordan                                   | Wildcat Jordan                                   | Santell, Al                   | Alfred Santell       | tt0013767 |
| 1746582067 | 1928 | 1928 | The Price of Fear                                | The Price of Fear                                | Jason, Leigh                  | Leigh Jason          | tt0019294 |
| 1746199815 | 1966 | 1966 | Paradise--Hawaiian Style                         | Paradise, Hawaiian Style                         | Moore, Michael                | Michael D. Moore     | tt0059563 |
| 1746576962 | 1959 | 1959 | Cast a Long Shadow                               | Cast a Long Shadow                               | Carr, Thomas                  | Thomas Carr          | tt0052681 |
| 1746574937 | 1935 | 1935 | Harmony Lane                                     | Harmony Lane                                     | Santley, Joseph               | Joseph Santley       | tt0026455 |
| 1746465329 | 1944 | 1944 | The Negro Soldier                                | The Negro Soldier                                | Heisler, Stuart               | Stuart Heisler       | tt0139491 |
| 1745374932 | 2010 | 2010 | Remember Me                                      | Remember Me                                      | Coulter, Allen                | Allen Coulter        | tt1403981 |
| 1746503665 | 1922 | 1922 | White Shoulders                                  | White Shoulders                                  | Forman, Tom                   | Tom Forman           | tt0013761 |
| 1746561015 | 1932 | 1932 | The Roadhouse Murder                             | The Roadhouse Murder                             | Ruben, J. Walter              | J. Walter Ruben      | tt0023406 |
| 1745309528 | 2007 | 2007 | Saw IV                                           | Saw IV                                           | Bousman, Darren Lynn          | Darren Lynn Bousman  | tt0890870 |
| 1746570000 | 1956 | 1956 | Teenage Rebel                                    | Teenage Rebel                                    | Goulding, Edmund              | Edmund Goulding      | tt0049831 |
| 1746514727 | 1916 | 1916 | The Scarlet Woman                                | The Scarlet Woman                                | Lawrence, Edmund              | Edmund Lawrence      | tt0007304 |
| 1746572365 | 1932 | 1932 | Sky Devils                                       | Sky Devils                                       | Sutherland, Edward            | A. Edward Sutherland | tt0023485 |
| 1746584735 | 1928 | 1928 | Gang War                                         | Gang War                                         | Glennon, Bert                 | Bert Glennon         | tt0018926 |
| 1746219426 | 1976 | 1976 | The Outlaw Josey Wales                           | The Outlaw Josey Wales                           | Eastwood, Clint               | Clint Eastwood       | tt0075029 |
| 1746555729 | 1955 | 1955 | The Americano                                    | The Americano                                    | Castle, William               | William Castle       | tt0047820 |
| 1746500005 | 1924 | 1924 | Blasted Hopes                                    | Blasted Hopes                                    | Rosson, Arthur                | Arthur Rosson        | tt0014722 |
| 1746584984 | 1940 | 1940 | Doomed to Die                                    | Doomed to Die                                    | Nigh, William                 | William Nigh         | tt0032404 |
| 1746580234 | 1935 | 1935 | The Mystery Man                                  | The Mystery Man                                  | McCarey, Raymond              | Ray McCarey          | tt0026756 |
| 1746465123 | 1942 | 1942 | Pierre of the Plains                             | Pierre of the Plains                             | Seitz, George B.              | George B. Seitz      | tt0035190 |
| 1746423729 | 1940 | 1940 | Girl from God's Country                          | Girl from God's Country                          | Salkow, Sidney                | Sidney Salkow        | tt0032526 |
| 1746580536 | 1935 | 1935 | The Melody Lingers On                            | The Melody Lingers On                            | Burton, David                 | David Burton         | tt0026696 |
| 1746578656 | 1959 | 1959 | The Last Mile                                    | The Last Mile                                    | Koch, Howard W.               | Howard W. Koch       | tt0052992 |
| 1746563490 | 1952 | 1952 | Sound Off                                        | Sound Off                                        |                               | Richard Quine        | tt0045181 |
| 1746435176 | 1942 | 1942 | Wild Bill Hickok Rides                           | Wild Bill Hickok Rides                           | Enright, Ray                  | Ray Enright          | tt0034392 |
| 1746577980 | 1936 | 1936 | The Gun Ranger                                   | The Gun Ranger                                   | Bradbury, Robert N.           | Robert N. Bradbury   | tt0028968 |
| 1746574560 | 1933 | 1933 | Blood Money                                      | Blood Money                                      | Brown, Rowland                | Rowland Brown        | tt0023818 |
| 1746497242 | 1919 | 1919 | The Roaring Road                                 | The Roaring Road                                 | Cruze, James                  | James Cruze          | tt0010635 |
| 1746577350 | 1960 | 1960 | Heller in Pink Tights                            | Heller in Pink Tights                            | Cukor, George                 | George Cukor         | tt0053902 |
| 1746577963 | 1935 | 1935 | We're Only Human                                 | We're Only Human                                 | Flood, James                  | James Flood          | tt0027187 |
| 1746491816 | 1947 | 1947 | The Secret Life of Walter Mitty                  | The Secret Life of Walter Mitty                  | McLeod, Norman Z.             | Norman Z. McLeod     | tt0039808 |
| 1746487161 | 1919 | 1919 | All of a Sudden Norma                            | All of a Sudden Norma                            | Hickman, Howard               | Howard C. Hickman    | tt0140800 |
| 1746492054 | 1945 | 1945 | See My Lawyer                                    | See My Lawyer                                    | Cline, Eddie                  | Edward F. Cline      | tt0038065 |
| 1746491888 | 1948 | 1948 | The Black Arrow                                  | The Black Arrow                                  | Douglas, Gordon; Hiecke, Carl | Gordon Douglas       | tt0040166 |
| 1746474406 | 1945 | 1945 | Roughly Speaking                                 | Roughly Speaking                                 | Curtiz, Michael               | Michael Curtiz       | tt0038038 |
| 1746409929 | 1986 | 1986 | Down by Law                                      | Down by Law                                      | Jarmusch, Jim                 | Jim Jarmusch         | tt0090967 |
| 1746585016 | 1939 | 1939 | Sky Patrol                                       | Sky Patrol                                       | Bretherton, Howard            | Howard Bretherton    | tt0033060 |
| 1746512212 | 1917 | 1917 | An Even Break                                    | An Even Break                                    | Hillyer, Lambert              | Lambert Hillyer      | tt0007903 |
| 1746507819 | 1925 | 1925 | That Man Jack                                    | That Man Jack!                                   | Craft, William J.             | William James Craft  | tt0016418 |
| 1746553975 | 1964 | 1964 | Ensign Pulver                                    | Ensign Pulver                                    | Logan, Joshua                 | Joshua Logan         | tt0058060 |
| 1746393098 | 1986 | 1986 | The Clan of the Cave Bear                        | The Clan of the Cave Bear                        | Chapman, Michael              | Michael Chapman      | tt0090848 |
| 1746582895 | 1937 | 1937 | The Great Hospital Mystery                       | The Great Hospital Mystery                       | Tinling, James                | James Tinling        | tt0028774 |

|            |      |      |                                               |                                               |                                 |                    |           |
|------------|------|------|-----------------------------------------------|-----------------------------------------------|---------------------------------|--------------------|-----------|
| 1746582182 | 1951 | 1951 | You're in the Navy Now                        | You're in the Navy Now                        | Hathaway, Henry                 | Henry Hathaway     | tt0044224 |
| 1746585018 | 1939 | 1939 | Calling Dr. Kildare                           | Calling Dr. Kildare                           | Bucquet, Harold S.              | Harold S. Bucquet  | tt0031133 |
| 1746438157 | 1943 | 1942 | Commandos Strike at Dawn                      | Commandos Strike at Dawn                      | Farrow, John                    | John Farrow        | tt0035746 |
| 1746437838 | 1942 | 1942 | Twin Beds                                     | Twin Beds                                     | Whelan, Tim                     | Tim Whelan         | tt0035479 |
| 1746515583 | 1922 | 1922 | Wildness of Youth                             | Wildness of Youth                             | Abramson, Ivan                  | Ivan Abramson      | tt0013768 |
| 1746394383 | 1985 | 1985 | My Science Project                            | My Science Project                            | Betuel, Jonathan R.             | Jonathan R. Betuel | tt0089652 |
| 1746218791 | 1970 | 1970 | Myra Breckinridge                             | Myra Breckinridge                             | Sarne, Michael                  | Michael Sarne      | tt0066115 |
| 1746408826 | 1985 | 1985 | Volunteers                                    | Volunteers                                    | Meyer, Nicholas                 | Nicholas Meyer     | tt0090274 |
| 1746501592 | 1922 | 1922 | The Infidel                                   | The Infidel                                   | Young, James                    | James Young        | tt0013267 |
| 1746438785 | 1995 | 1995 | Canadian Bacon                                | Canadian Bacon                                | Moore, Michael                  | Michael Moore      | tt0109370 |
| 1746208423 | 1969 | 1969 | Turn On to Love                               | Turn on to Love                               | Avildsen, John G.               | John G. Avildsen   | tt0065131 |
| 1746523328 | 1927 | 1927 | Down the Stretch                              | Down the Stretch                              | Baggot, King                    | King Baggot        | tt0017824 |
| 1746504545 | 1919 | 1919 | The Ace of the Saddle                         | Ace of the Saddle                             | Ford, Jack                      | John Ford          | tt0009859 |
| 1746585274 | 1928 | 1928 | Divine Sinner                                 | The Divine Sinner                             | Pembroke, Scott                 | Scott Pembroke     | tt0018835 |
| 1746564442 | 1952 | 1952 | Chained for Life                              | Chained for Life                              | Fraser, Harry L.                | Harry L. Fraser    | tt0043397 |
| 1746523710 | 1914 | 1914 | Threads of Destiny                            | Threads of Destiny                            | Smiley, Joseph W.               | Joseph W. Smiley   | tt0004695 |
| 1745359603 | 2001 | 2001 | The Bread, My Sweet                           | The Bread, My Sweet                           | Martin, Melissa                 | Melissa Martin     | tt0281680 |
| 1746502396 | 1916 | 1916 | Saint, Devil and Woman                        | Saint, Devil and Woman                        | Sullivan, Frederic              | Frederick Sullivan | tt0158909 |
| 1746514441 | 1910 | 1910 | The Tide of Fortune                           | The Tide of Fortune                           |                                 | Harry Solter       | tt0329684 |
| 1746578974 | 1958 | 1958 | The Roots of Heaven                           | The Roots of Heaven                           | Huston, John                    | John Huston        | tt0052148 |
| 1746582502 | 1937 | 1937 | Range Defenders                               | Range Defenders                               | Wright, Mack V.                 | Mack V. Wright     | tt0029462 |
| 1746580454 | 1937 | 1937 | Round-Up Time in Texas                        | Round Up Time in Texas                        | Kane, Joseph                    | Joseph Kane        | tt0029501 |
| 1746532755 | 1914 | 1914 | The Truth Wagon                               | The Truth Wagon                               | Figman, Max                     | Max Figman         | tt0004734 |
| 1746248436 | 1968 | 1968 | A Time To Sing                                | A Time to Sing                                | Dreifuss, Arthur                | Arthur Dreifuss    | tt0063698 |
| 1746409807 | 1982 | 1982 | 48 Hrs.                                       | 48 Hrs.                                       | Hill, Walter                    | Walter Hill        | tt0083511 |
| 1746464871 | 1944 | 1944 | Swing in the Saddle                           | Swing in the Saddle                           | Landers, Lew                    | Lew Landers        | tt0037338 |
| 1746516526 | 1920 | 1920 | In the Shadow of the Dome                     | In the Shadow of the Dome                     | Fischer, David G.               | David G. Fischer   | tt0195831 |
| 1746514824 | 1915 | 1915 | An Affair of Three Nations                    | An Affair of Three Nations                    | Daly, Arnold; Miller, Ashley    | Ashley Miller      | tt0004861 |
| 1746408650 | 1986 | 1986 | 8 Million Ways to Die                         | 8 Million Ways to Die                         | Ashby, Hal                      | Hal Ashby          | tt0090568 |
| 1746435166 | 1941 | 1941 | Bowery Blitzkrieg                             | Bowery Blitzkrieg                             | Fox, Wallace                    | Wallace Fox        | tt0033428 |
| 1746574502 | 1952 | 1952 | Million Dollar Mermaid                        | Million Dollar Mermaid                        | LeRoy, Mervyn                   | Mervyn LeRoy       | tt0044903 |
| 1746436996 | 1942 | 1942 | Panama Hattie                                 | Panama Hattie                                 | McLeod, Norman Z.               | Norman Z. McLeod   | tt0035170 |
| 1746520577 | 1926 | 1926 | The Arizona Sweepstakes                       | Arizona Sweepstakes                           | Smith, Clifford S.              | Clifford Smith     | tt0016610 |
| 1746269696 | 1976 | 1975 | Psychic Killer                                | Psychic Killer                                | Danton, Raymond                 | Ray Danton         | tt0073586 |
| 1746235470 | 1978 | 1978 | Coming Home                                   | Coming Home                                   | Ashby, Hal                      | Hal Ashby          | tt0077362 |
| 1746486849 | 1920 | 1920 | The Blue Moon                                 | The Blue Moon                                 | Cox, George L.                  | George L. Cox      | tt0186889 |
| 1746235458 | 1980 | 1980 | The Big Red One                               | The Big Red One                               | Fuller, Samuel                  | Samuel Fuller      | tt0080437 |
| 1746571004 | 1952 | 1952 | The Belle of New York                         | The Belle of New York                         | Walters, Charles                | Charles Walters    | tt0044408 |
| 1746410139 | 1990 | 1990 | Another 48 Hrs.                               | Another 48 Hrs.                               | Hill, Walter                    | Walter Hill        | tt0099044 |
| 1745282630 | 2005 | 2005 | You Think You Really Know Me: The Gary Wilson | You Think You Really Know Me: The Gary Wilson | Wolk, Michael                   | Michael Wolk       | tt0458529 |
| 1746569623 | 1954 | 1954 | Three Coins in the Fountain                   | Three Coins in the Fountain                   | Negulesco, Jean                 | Jean Negulesco     | tt0047580 |
| 1746200348 | 1968 | 1967 | Countdown                                     | Countdown                                     | Altman, Robert                  | Robert Altman      | tt0062827 |
| 1746571002 | 1933 | 1933 | Hoop-la                                       | Hoop-la                                       | Lloyd, Frank                    | Frank Lloyd        | tt0024139 |
| 1746575069 | 1933 | 1933 | Easy Millions                                 | Easy Millions                                 | Newmeyer, Fred                  | Fred C. Newmeyer   | tt0023976 |
| 1745340302 | 2001 | 2001 | Exit Wounds                                   | Exit Wounds                                   | Bartkowiak, Andrzej             | Andrzej Bartkowiak | tt0242445 |
| 1746514817 | 1910 | 1910 | Never Again                                   | Never Again                                   | Powell, Frank                   | Frank Powell       | tt0001334 |
| 1746520685 | 1950 | 1950 | I Was a Shoplifter                            | I Was a Shoplifter                            | Lamont, Charles                 | Charles Lamont     | tt0042588 |
| 1746584328 | 1936 | 1936 | Two in Revolt                                 | Two in Revolt                                 | Tryon, Glenn                    | Glenn Tryon        | tt0028431 |
| 1746567279 | 1932 | 1932 | If I Had a Million                            | If I Had a Million                            |                                 | James Cruze        | tt0023049 |
| 1746393254 | 1988 | 1988 | The Last Temptation of Christ                 | The Last Temptation of Christ                 | Scorsese, Martin                | Martin Scorsese    | tt0095497 |
| 1746183411 | 1910 | 1910 | Blue Horse Mine                               | The Blue Horse Mine                           |                                 |                    | tt0348552 |
| 1746440003 | 1996 | 1995 | The Celluloid Closet                          | The Celluloid Closet                          | Epstein, Rob; Friedman, Jeffrey | Rob Epstein        | tt0112651 |
| 1746583453 | 1950 | 1950 | Outside the Wall                              | Outside the Wall                              | Wilbur, Crane                   | Crane Wilbur       | tt0042826 |
| 1746454041 | 1942 | 1942 | Always in My Heart                            | Always in My Heart                            | Graham, Jo                      | Jo Graham          | tt0034454 |
| 1746562234 | 1953 | 1953 | Desert Legion                                 | Desert Legion                                 | Pevney, Joseph                  | Joseph Pevney      | tt0045678 |
| 1746523306 | 1916 | 1916 | I Accuse                                      | I Accuse                                      | Haddock, William F.             | William F. Haddock | tt0145829 |
| 1746464842 | 1941 | 1941 | Unholy Partners                               | Unholy Partners                               | LeRoy, Mervyn                   | Mervyn LeRoy       | tt0034342 |

|            |      |      |                                            |                                            |                                     |                        |           |
|------------|------|------|--------------------------------------------|--------------------------------------------|-------------------------------------|------------------------|-----------|
| 1746409706 | 1991 | 1991 | The Dark Backward                          | The Dark Backward                          | Rifkin, Adam                        | Adam Rifkin            | tt0101660 |
| 1746583467 | 1931 | 1931 | Trails of the Golden West                  | Trails of the Golden West                  | De Cordova, Leander                 | Leander De Cordova     | tt0022498 |
| 1746409808 | 1985 | 1985 | Code of Silence                            | Code of Silence                            | Davis, Andrew                       | Andrew Davis           | tt0088936 |
| 1746560065 | 1965 | 1965 | Rat Fink                                   | Rat Fink                                   | Landis, James                       | James Landis           | tt0059636 |
| 1746497041 | 1922 | 1922 | Kid Canfield the Reform Gambler            | Kid Canfield, the Reform Gambler           |                                     | Kid Canfield           | tt0332670 |
| 1746487870 | 1921 | 1921 | The Simp                                   | The Simp                                   |                                     | Ferris Hartman         | tt0977827 |
| 1746487301 | 1918 | 1918 | Shifting Sands                             | Shifting Sands                             | Parker, Albert                      |                        | tt2823094 |
| 1746524180 | 1915 | 1915 | The Magic Toy Maker                        | The Magic Toy Maker                        | Kingsley, Pierce                    | Pierce Kingsley        | tt0005686 |
| 1746408638 | 1984 | 1983 | Signals Through the Flames                 | Signals Through the Flames                 | Rochlin, Sheldon; Harris, Maxine    | Sheldon Rochlin        | tt0235764 |
| 1746218918 | 1976 | 1976 | The Amazing Dobermans                      | The Amazing Dobermans                      | Chudnow, Byron Ross                 | Byron Chudnow          | tt0074130 |
| 1746258204 | 1975 | 1974 | TNT Jackson                                | TNT Jackson                                | Santiago, Cirio                     | Cirio H. Santiago      | tt0072245 |
| 1746583364 | 1951 | 1951 | St. Benny the Dip                          | St. Benny the Dip                          | Ulmer, Edgar G.                     | Edgar G. Ulmer         | tt0044067 |
| 1746530786 | 1949 | 1948 | The Quiet One                              | The Quiet One                              | Meyers, Sidney                      | Sidney Meyers          | tt0040717 |
| 1746520851 | 1949 | 1949 | The Mutineers                              | The Mutineers                              | Yarbrough, Jean                     | Jean Yarbrough         | tt0041670 |
| 1746520941 | 1949 | 1949 | Frontier Investigator                      | Frontier Investigator                      | Brannon, Fred C.                    | Fred C. Brannon        | tt0041392 |
| 1746435156 | 1943 | 1943 | Find the Blackmailer                       | Find the Blackmailer                       | Lederman, D. Ross                   | D. Ross Lederman       | tt0035879 |
| 1746453497 | 1942 | 1942 | The World at War                           | The World at War                           |                                     | Lowell Mellett         | tt0185016 |
| 1746523815 | 1927 | 1928 | Framed                                     | Framed                                     | Brabin, Charles J.                  | Bruce Mitchell         | tt0349464 |
| 1746500729 | 1925 | 1925 | On the Go                                  | On the Go                                  | Thorpe, Richard                     | Benjamin Stoloff       | tt0867373 |
| 1746509360 | 1924 | 1924 | Trouble Trail                              | Trouble Trail                              | Holt, George                        | George Holt            | tt0174285 |
| 1746584089 | 1940 | 1940 | The Last Alarm                             | The Last Alarm                             | West, William                       | William West           | tt0032690 |
| 1746454469 | 1940 | 1940 | Ridin' the Trail                           | Ridin' the Trail                           | Johnson, Raymond K.                 | Bernard B. Ray         | tt0134056 |
| 1746584375 | 1940 | 1940 | Land of the Six Guns                       | Land of the Six Guns                       | Johnson, Raymond K.                 | Bernard B. Ray         | tt0032689 |
| 1746582887 | 1939 | 1939 | Straight to Heaven                         | Straight to Heaven                         | Leonard, Arthur                     | Arthur H. Leonard      | tt0031984 |
| 1746580738 | 1938 | 1938 | Making the Headlines                       | Making the Headlines                       | Collins, Lewis D.                   | Lewis D. Collins       | tt0030405 |
| 1746577917 | 1937 | 1937 | Whistling Bullets                          | Whistling Bullets                          | English, John W.                    | John English           | tt0029768 |
| 1746580636 | 1937 | 1938 | Race Suicide                               | Race Suicide                               | Luby, S. Roy                        | S. Roy Luby            | tt0030936 |
| 1746580427 | 1936 | 1936 | Tango                                      | Tango                                      | Rosen, Phil                         | Phil Rosen             | tt0028343 |
| 1746574732 | 1936 | 1936 | West of Nevada                             | West of Nevada                             | Hill, Robert                        | Robert F. Hill         | tt0028491 |
| 1746577763 | 1936 | 1936 | Rebellion                                  | Rebellion                                  | Shores, Lynn                        | Lynn Shores            | tt0028162 |
| 1746576957 | 1958 | 1958 | Street of Darkness                         | Street of Darkness                         | Walker, Robert                      | Robert G. Walker       | tt0152608 |
| 1746199519 | 1969 | 1969 | Journey Into Self                          | Journey Into Self                          |                                     | Bill McGaw             | tt0063160 |
| 1769970489 | 1967 | 1967 | Diary of a Swinger                         | Diary of a Swinger                         | Amero, John; Amero, Lem             | John Amero             | tt0135921 |
| 1746185901 | 1967 | 1967 | Himself as Herself                         | Himself as Herself                         | Markopoulos, Gregory J.             | Gregory J. Markopoulos | tt0195782 |
| 1746185142 | 1965 | 1964 | Goldstein                                  | Goldstein                                  | Kaufman, Philip; Manaster, Benjamin | Philip Kaufman         | tt0144947 |
| 1746571242 | 1935 | 1935 | Border Vengeance                           | Border Vengeance                           | Heinz, Ray                          | Ray Heinz              | tt0176564 |
| 1746394546 | 1992 | 1991 | American Fabulous                          | American Fabulous                          | Dakota, Reno                        | Reno Dakota            | tt0103669 |
| 1746433683 | 1989 | 1989 | The 'Burbs                                 | The 'Burbs                                 | Dante, Joe                          | Joe Dante              | tt0096734 |
| 1746198931 | 1968 | 1967 | Good Morning, and Goodbye!                 | Good Morning... and Goodbye!               | Meyer, Russ                         | Russ Meyer             | tt0061719 |
| 1746465294 | 1945 | 1945 | My Name Is Julia Ross                      | My Name Is Julia Ross                      | Lewis, Joseph H.                    | Joseph H. Lewis        | tt0037932 |
| 1746585166 | 1930 | 1930 | The Matrimonial Bed                        | The Matrimonial Bed                        | Curtiz, Michael                     | Michael Curtiz         | tt0021132 |
| 1746554123 | 1963 | 1963 | The Raven                                  | The Raven                                  | Corman, Roger                       | Roger Corman           | tt0057449 |
| 1746509358 | 1924 | 1924 | The Valley of Vanishing Men                | Valley of Vanishing Men                    | Hart, Neal                          | Neal Hart              | tt0176279 |
| 1769975293 | 1916 | 1916 | A Telegraphic Tangle                       | A Telegraphic Tangle                       | Drew, Sidney                        | Sidney Drew            | tt0155248 |
| 1746580763 | 1935 | 1935 | Smokey Smith                               | Smokey Smith                               | Bradbury, Robert N.                 | Robert N. Bradbury     | tt0027015 |
| 1746582826 | 1936 | 1936 | The Amazing Exploits of the Clutching Hand | The Amazing Exploits of the Clutching Hand | Herman, Albert                      | Albert Herman          | tt0027452 |
| 1746500026 | 1948 | 1948 | Son of God's Country                       | Son of God's Country                       | Springsteen, R. G.                  | R.G. Springsteen       | tt0040819 |
| 1746566202 | 1954 | 1954 | Beachhead                                  | Beachhead                                  | Heisler, Stuart                     | Stuart Heisler         | tt0046757 |
| 1746569864 | 1958 | 1958 | The Fly                                    | The Fly                                    | Neumann, Kurt                       | Kurt Neumann           | tt0051622 |
| 1746436187 | 1995 | 1995 | Mortal Combat                              | Mortal Combat                              | Anderson, Paul                      | Paul W.S. Anderson     | tt0113855 |
| 1746524212 | 1910 | 1910 | Pressed Roses                              | Pressed Roses                              |                                     | Harry Solter           | tt0200973 |
| 1746583948 | 1930 | 1930 | Dangerous Nan McGrew                       | Dangerous Nan McGrew                       | St. Clair, Malcolm                  | Malcolm St. Clair      | tt0020809 |
| 1746500271 | 1926 | 1925 | Here He Comes                              | Here He Comes                              | Corby, Travers                      | Travers Colby          | tt0356688 |
| 1746580317 | 1938 | 1938 | Mr. Chump                                  | Mr. Chump                                  | Clemens, William                    | William Clemens        | tt0030467 |
| 1746500615 | 1926 | 1926 | The Road to Broadway                       | The Road to Broadway                       | Mitchell, Howard                    | Howard M. Mitchell     | tt0156968 |
| 1746217016 | 1968 | 1968 | Prowl Girls                                | Prowl Girls                                |                                     | Barry Mahon            | tt0255519 |
| 1746504744 | 1921 | 1921 | School Days                                | School Days                                | Nigh, William                       | William Nigh           | tt0162635 |



|            |      |      |                                               |                                            |                                |                     |           |
|------------|------|------|-----------------------------------------------|--------------------------------------------|--------------------------------|---------------------|-----------|
| 1746581519 | 1910 | 1910 | The Girls of the Range                        | The Girls of the Range                     |                                | Francis Boggs       | tt1390944 |
| 1746435863 | 1999 | 1999 | Cruel Intentions                              | Cruel Intentions                           | Kumble, Roger                  | Roger Kumble        | tt0139134 |
| 1746543065 | 1915 | 1915 | The Captive                                   | The Captive                                | DeMille, Cecil B.              | Cecil B. DeMille    | tt0005059 |
| 1746565918 | 1953 | 1953 | Glen or Glenda?                               | Glen or Glenda                             | Wood, Edward D.                | Edward D. Wood Jr.  | tt0045826 |
| 1746439222 | 1998 | 1998 | Another Day in Paradise                       | Another Day in Paradise                    | Clark, Larry                   | Larry Clark         | tt0127722 |
| 1745342472 | 2008 | 2008 | Burn After Reading                            | Burn After Reading                         | Coen, Ethan; Coen, Joel        | Ethan Coen          | tt0887883 |
| 1746573767 | 1956 | 1956 | Navy Wife                                     | Navy Wife                                  | Bernds, Edward L.              | Edward Bernds       | tt0049544 |
| 1746577518 | 1938 | 1938 | I'm from the City                             | I'm from the City                          | Holmes, Ben                    | Ben Holmes          | tt0030262 |
| 1746485592 | 1918 | 1919 | Angel Child                                   | Angel Child                                | Otto, Henry                    | Henry Otto          | tt0182714 |
| 1746550310 | 1955 | 1955 | White Feather                                 | White Feather                              | Webb, Robert                   | Robert D. Webb      | tt0048805 |
| 1746580197 | 1937 | 1937 | Hot Water                                     | Hot Water                                  | Strayer, Frank R.              | Frank R. Strayer    | tt0029023 |
| 1746208528 | 1966 | 1965 | Adam Lost His Apple                           | Adam Lost His Apple                        | Wainwright, Earl               | Earl Wainwright     | tt0058874 |
| 1746438630 | 1941 | 1941 | West Point Widow                              | West Point Widow                           | Siodmak, Robert                | Robert Siodmak      | tt0034381 |
| 1746453672 | 1998 | 1998 | Velvet Goldmine                               | Velvet Goldmine                            | Haynes, Todd                   | Todd Haynes         | tt0120879 |
| 1746491732 | 1944 | 1944 | Cry of the Werewolf                           | Cry of the Werewolf                        | Levin, Henry                   | Henry Levin         | tt0036731 |
| 1746584962 | 1939 | 1939 | The Witness Vanishes                          | The Witness Vanishes                       | Garrett, Otis                  | Otis Garrett        | tt0032137 |
| 1746218443 | 1966 | 1966 | Swamp Country                                 | Swamp Country                              | Patrick, Robert                | Robert Patrick      | tt0160937 |
| 1746410525 | 1987 | 1987 | Creepshow 2                                   | Creepshow 2                                | Gornick, Michael               | Michael Gornick     | tt0092796 |
| 1746577250 | 1951 | 1951 | Kentucky Jubilee                              | Kentucky Jubilee                           | Ormond, Ron                    | Ron Ormond          | tt0043705 |
| 1746409121 | 1987 | 1987 | Enemy Territory                               | Enemy Territory                            | Manoogian, Peter               | Peter Manoogian     | tt0092969 |
| 1746584429 | 1939 | 1939 | Spoilers of the Range                         | Spoilers of the Range                      | Coleman, C. C.                 | Charles C. Coleman  | tt0031963 |
| 1746502548 | 1917 | 1917 | The Hater of Men                              | The Hater of Men                           | Miller, Charles                | Charles Miller      | tt0008051 |
| 1746499854 | 1947 | 1947 | The Woman on the Beach                        | The Woman on the Beach                     | Renoir, Jean                   | Jean Renoir         | tt0040000 |
| 1746235387 | 1973 | 1973 | Coffy                                         | Coffy                                      | Hill, Jack                     | Jack Hill           | tt0069897 |
| 1746532737 | 1923 | 1923 | The Wild Party                                | The Wild Party                             | Blaché, Herbert                | Herbert Blaché      | tt0014616 |
| 1746578029 | 1935 | 1935 | Bars of Hate                                  | Bars of Hate                               | Herman, Al                     | Albert Herman       | tt0027335 |
| 1746584063 | 1935 | 1935 | Here's to Romance                             | Here's to Romance                          | Green, Alfred E.               | Alfred E. Green     | tt0026467 |
| 1746578373 | 1950 | 1950 | The Vanishing Westerner                       | The Vanishing Westerner                    | Ford, Philip                   | Philip Ford         | tt0043098 |
| 1746453646 | 1942 | 1942 | Here We Go Again                              | Here We Go Again                           | Dwan, Allan                    | Allan Dwan          | tt0034847 |
| 1745309499 | 2007 | 2007 | Unborn in the USA: Inside the War on Abortion | Unborn in the USA: Inside the War on Abort | Fell, Stephen ; Thompson, Will | Stephen Fell        | tt1059238 |
| 1746394229 | 1990 | 1990 | Wild at Heart                                 | Wild at Heart                              | Lynch, David                   | David Lynch         | tt0100935 |
| 1746465197 | 1945 | 1944 | The Keys of the Kingdom                       | The Keys of the Kingdom                    | Stahl, John M.                 | John M. Stahl       | tt0036983 |
| 1745302578 | 2005 | 2005 | The Devil and Daniel Johnston                 | The Devil and Daniel Johnston              | Feuerzeig, Jeff                | Jeff Feuerzeig      | tt0436231 |
| 1746211073 | 1970 | 1970 | Soldier Blue                                  | Soldier Blue                               | Nelson, Ralph                  | Ralph Nelson        | tt0066390 |
| 1746235066 | 1972 | 1972 | Get to Know Your Rabbit                       | Get to Know Your Rabbit                    | De Palma, Brian                | Brian De Palma      | tt0068637 |
| 1746580624 | 1938 | 1938 | Too Hot to Handle                             | Too Hot to Handle                          | Conroy, Jack                   | Jack Conway         | tt0030879 |
| 1746422020 | 1989 | 1989 | The Fabulous Baker Boys                       | The Fabulous Baker Boys                    | Kloves, Steve                  | Steve Kloves        | tt0097322 |
| 1746520326 | 1926 | 1926 | Kosher Kitty Kelly                            | Kosher Kitty Kelly                         | Horne, James W.                | James W. Horne      | tt0017044 |
| 1746492460 | 1947 | 1947 | Cynthia                                       | Cynthia                                    | Leonard, Robert Z.             | Robert Z. Leonard   | tt0039293 |
| 1746578488 | 1951 | 1950 | Gambling House                                | Gambling House                             | Tetzlaff, Ted                  | Ted Tetzlaff        | tt0042496 |
| 1746436206 | 1995 | 1995 | Leaving Las Vegas                             | Leaving Las Vegas                          | Figgis, Mike                   | Mike Figgis         | tt0113627 |
| 1746585475 | 1939 | 1939 | Mystery Plane                                 | Mystery Plane                              | Waggner, George                | George Waggner      | tt0031703 |
| 1745372491 | 2008 | 2008 | Step Brothers                                 | Step Brothers                              | McKay, Adam                    | Adam McKay          | tt0838283 |
| 1746508692 | 1925 | 1925 | The Man from Red Gulch                        | The Man from Red Gulch                     | Mortimer, Edmund               | Edmund Mortimer     | tt0016072 |
| 1746575050 | 1936 | 1936 | Secret Patrol                                 | Secret Patrol                              | Selman, David                  | David Selman        | tt0028232 |
| 1746410894 | 1993 | 1993 | Ghost in the Machine                          | Ghost in the Machine                       | Talalay, Rachel                | Rachel Talalay      | tt0107009 |
| 1746574780 | 1934 | 1934 | Grand Canary                                  | Grand Canary                               | Cummings, Irving               | Irving Cummings     | tt0025196 |
| 1746408518 | 1986 | 1986 | Labyrinth                                     | Labyrinth                                  | Henson, Jim                    | Jim Henson          | tt0091369 |
| 1746561997 | 1956 | 1956 | The Great American Pastime                    | The Great American Pastime                 | Hoffman, Herman                | Herman Hoffman      | tt0049277 |
| 1746508212 | 1926 | 1926 | The Lone Wolf Returns                         | The Lone Wolf Returns                      | Ince, Ralph                    | Ralph Ince          | tt0017077 |
| 1746507908 | 1927 | 1927 | One Hour of Love                              | One Hour of Love                           | Florey, Robert                 | Robert Florey       | tt0018227 |
| 1746454038 | 1942 | 1942 | North to the Klondike                         | North to the Klondike                      | Kenton, Erle C.                | Erle C. Kenton      | tt0035133 |
| 1746530787 | 1949 | 1949 | Crashing Thru                                 | Crashing Thru                              | Taylor, Ray                    | Ray Taylor          | tt0041265 |
| 1746500732 | 1924 | 1924 | The Millionaire Cowboy                        | The Millionaire Cowboy                     | Garson, Harry                  | Harry Garson        | tt0015139 |
| 1746208481 | 1966 | 1966 | Rat Pfink A Boo Boo                           | Rat Pfink a Boo Boo                        | Steckler, Ray Dennis           | Ray Dennis Steckler | tt0059637 |
| 1746561632 | 1932 | 1932 | Unholy Love                                   | Unholy Love                                | Ray, Albert                    | Albert Ray          | tt0023641 |
| 1746585369 | 1939 | 1939 | Unmarried                                     | Unmarried                                  | Neumann, Kurt                  | Kurt Neumann        | tt0032081 |

|            |      |      |                                     |                                     |                                 |                      |           |
|------------|------|------|-------------------------------------|-------------------------------------|---------------------------------|----------------------|-----------|
| 1746566275 | 1957 | 1957 | Gunfight at the O.K. Corral         | Gunfight at the O.K. Corral         | Sturges, John                   | John Sturges         | tt0050468 |
| 1746545142 | 1940 | 1940 | Dancing on a Dime                   | Dancing on a Dime                   | Santley, Joseph                 | Joseph Santley       | tt0032377 |
| 1746421721 | 1994 | 1994 | The Chase                           | The Chase                           | Rifkin, Adam                    | Adam Rifkin          | tt0109402 |
| 1745342834 | 2009 | 2008 | Under Our Skin                      | Under Our Skin                      | Wilson, Andy Abrahams           | Andy Abrahams Wilson | tt1202579 |
| 1746577097 | 1958 | 1958 | Twilight for the Gods               | Twilight for the Gods               | Pevney, Joseph                  | Joseph Pevney        | tt0052326 |
| 1746455219 | 2000 | 2000 | Meet the Parents                    | Meet the Parents                    | Roach, Jay                      | Jay Roach            | tt0212338 |
| 1746515802 | 1922 | 1922 | Lure of Gold                        | Lure of Gold                        | Hart, Neal                      | Neal Hart            | tt0013346 |
| 1746549812 | 1954 | 1954 | Drive a Crooked Road                | Drive a Crooked Road                | Quine, Richard                  | Richard Quine        | tt0046935 |
| 1746578714 | 1951 | 1951 | The Day the Earth Stood Still       | The Day the Earth Stood Still       | Wise, Robert                    | Robert Wise          | tt0043456 |
| 1746203027 | 1970 | 1970 | A Man Called Horse                  | A Man Called Horse                  | Silverstein, Elliot             | Elliot Silverstein   | tt0066049 |
| 1746580300 | 1936 | 1936 | The Captain's Kid                   | The Captain's Kid                   | Grinde, Nick                    | Nick Grinde          | tt0028688 |
| 1745309113 | 2006 | 2005 | Pizza                               | Pizza                               | Christopher, Mark               | Mark Christopher     | tt0376827 |
| 1746524527 | 1923 | 1923 | Wolf Tracks                         | Wolf Tracks                         | North Bradbury, Robert          | Robert N. Bradbury   | tt0011871 |
| 1746516316 | 1921 | 1921 | Be My Wife                          | Be My Wife                          | Linder, Max                     | Max Linder           | tt0011948 |
| 1746584732 | 1929 | 1929 | Fox Movietone Follies of 1929       | Fox Movietone Follies of 1929       | Butler, David                   | David Butler         | tt0019896 |
| 1746454160 | 1999 | 1999 | My Favorite Martian                 | My Favorite Martian                 | Petrie, Donald                  | Donald Petrie        | tt0120764 |
| 1746199025 | 1969 | 1969 | The Model Shop                      | Model Shop                          | Demy, Jacques                   | Jacques Demy         | tt0064679 |
| 1746475260 | 1947 | 1947 | The Fabulous Dorseys                | The Fabulous Dorseys                | Green, Alfred E.                | Alfred E. Green      | tt0039365 |
| 1746437400 | 1940 | 1940 | Dulcy                               | Dulcy                               | Simon, S. Sylvan                | S. Sylvan Simon      | tt0032422 |
| 1746507831 | 1925 | 1925 | Scandal Street                      | Scandal Street                      | Bennett, Whitman                | Whitman Bennett      | tt0016316 |
| 1746524199 | 1915 | 1915 | Camille                             | Camille                             | Capellani, Albert               | Albert Capellani     | tt0005049 |
| 1746422149 | 1994 | 1994 | Baby's Day Out                      | Baby's Day Out                      | Johnson, Patrick Read           | Patrick Read Johnson | tt0109190 |
| 1745303023 | 2007 | 2006 | Walking to Werner                   | Walking to Werner                   | Phillips, Linas                 | Linas Phillips       | tt0798898 |
| 1746549734 | 1955 | 1955 | An Annapolis Story                  | An Annapolis Story                  | Siegel, Don                     | Don Siegel           | tt0047835 |
| 1746455710 | 1998 | 1997 | Inside/Out                          | Inside Out                          | Tregenza, Rob                   | Jason Gould          | tt0119372 |
| 1746576188 | 1932 | 1932 | Escapade                            | Escapade                            | Thorpe, Richard                 | Richard Thorpe       | tt0022861 |
| 1746584033 | 1937 | 1937 | Riding on Air                       | Riding on Air                       | Sedgwick, Edward                | Edward Sedgwick      | tt0029488 |
| 1746508072 | 1948 | 1948 | Strange Gamble                      | Strange Gamble                      | Archainbaud, George             | George Archainbaud   | tt0040837 |
| 1746248387 | 1966 | 1966 | Music City U. S. A.                 | Music City U.S.A.                   | Collins, Preston; Dinert, James | Preston Collins      | tt1487981 |
| 1746437543 | 2000 | 1999 | Hot Wax Zombies on Wheels           | Hot Wax Zombies on Wheels           | Roush, Mike J.                  | Michael Roush        | tt0160376 |
| 1746513036 | 1915 | 1915 | The Girl of the Golden West         | The Girl of the Golden West         | DeMille, Cecil B.               | Cecil B. DeMille     | tt0005393 |
| 1746465002 | 1947 | 1947 | Last Days of Boot Hill              | Last Days of Boot Hill              | Nazarro, Ray                    | Ray Nazarro          | tt0039551 |
| 1746584107 | 1938 | 1938 | Law of the Plains                   | Law of the Plains                   | Nelson, Sam                     | Sam Nelson           | tt0030351 |
| 1746573957 | 1958 | 1958 | Satan's Satellites                  | Satan's Satellites                  | Brannon, Fred C.                | Fred C. Brannon      | tt0052160 |
| 1746209809 | 1970 | 1969 | Mondo Trasho                        | Mondo Trasho                        | Waters, John                    | John Waters          | tt0064683 |
| 1746566987 | 1932 | 1932 | Stowaway                            | Stowaway                            | Whitman, Phil                   | Phil Whitman         | tt0023518 |
| 1746410185 | 1992 | 1992 | Captain Ron                         | Captain Ron                         | Eberhardt, Thom                 | Thom Eberhardt       | tt0103924 |
| 1746582149 | 1930 | 1930 | A Devil With Women                  | A Devil with Women                  | Cummings, Irving                | Irving Cummings      | tt0020822 |
| 1745342265 | 2009 | 2009 | Laid to Rest                        | Laid to Rest                        | Hall, Robert                    | Robert Hall          | tt1228933 |
| 1769970409 | 1965 | 1965 | Nympho                              | Nympho                              | Nicola, Alfredo                 | Nick Millard         | tt1468867 |
| 1746573584 | 1932 | 1932 | Polly of the Circus                 | Polly of the Circus                 | Santell, Alfred                 | Alfred Santell       | tt0023349 |
| 1746218678 | 1974 | 1974 | Black Belt Jones                    | Black Belt Jones                    | Clouse, Robert                  | Robert Clouse        | tt0071221 |
| 1746495629 | 1918 | 1918 | Old Wives for New                   | Old Wives for New                   | DeMille, Cecil B.               | Cecil B. DeMille     | tt0009440 |
| 1746572976 | 1931 | 1931 | Sporting Chance                     | Sporting Chance                     | Herman, Albert                  | Albert Herman        | tt0129392 |
| 1746438184 | 1942 | 1942 | Get Hep to Love                     | Get Hep to Love                     | Lamont, Charles                 | Charles Lamont       | tt0034784 |
| 1746500887 | 1916 | 1916 | The Eternal Grind                   | The Eternal Grind                   | O'Brien, John B.                | John B. O'Brien      | tt0006637 |
| 1746501351 | 1915 | 1915 | The Slim Princess                   | The Slim Princess                   | Calvert, E. H.                  | E.H. Calvert         | tt0006059 |
| 1746584915 | 1940 | 1940 | Escape                              | Escape                              | LeRoy, Mervyn                   | Mervyn LeRoy         | tt0032447 |
| 1746454294 | 1942 | 1942 | Prisoner of Japan                   | Prisoner of Japan                   | Ripley, Arthur                  | Arthur Ripley        | tt0035217 |
| 1746585443 | 1939 | 1939 | Charlie Chan in Reno                | Charlie Chan in Reno                | Foster, Norman                  | Norman Foster        | tt0031149 |
| 1746484087 | 1918 | 1918 | Her Decision                        | Her Decision                        | Conway, Jack                    | Jack Conway          | tt0009161 |
| 1746235664 | 1974 | 1974 | The Parallax View                   | The Parallax View                   | Pakula, Alan J.                 | Alan J. Pakula       | tt0071970 |
| 1746582920 | 1938 | 1938 | The Black Doll                      | The Black Doll                      | Garrett, Otis                   | Otis Garrett         | tt0029918 |
| 1746554885 | 1957 | 1957 | Carnival Rock                       | Carnival Rock                       | Corman, Roger                   | Roger Corman         | tt0050230 |
| 1746555217 | 1956 | 1956 | Battle Stations                     | Battle Stations                     | Seiler, Lewis                   | Lewis Seiler         | tt0048989 |
| 1746584453 | 1929 | 1929 | The Unholy Night                    | The Unholy Night                    | Barrymore, Lionel               | Lionel Barrymore     | tt0020534 |
| 1745282668 | 2005 | 2005 | Harry Potter and the Goblet of Fire | Harry Potter and the Goblet of Fire | Newell, Mike                    | Mike Newell          | tt0330373 |

|                   |             |             |                              |                              |                            |                      |                  |
|-------------------|-------------|-------------|------------------------------|------------------------------|----------------------------|----------------------|------------------|
| 1746562207        | 1954        | 1954        | The Egyptian                 | The Egyptian                 | Curtiz, Michael            | Michael Curtiz       | tt0046949        |
| 1746454029        | 1941        | 1941        | Lone Star Law Men            | Lone Star Law Men            | Tansey, Robert             | Robert Emmett Tansey | tt0033847        |
| 1746584186        | 1940        | 1940        | A Dispatch from Reuters      | A Dispatch from Reuters      | Dieterle, William          | William Dieterle     | tt0032396        |
| 1746572453        | 1931        | 1931        | The Reckless Hour            | The Reckless Hour            | Dillon, John Francis       | John Francis Dillon  | tt0022297        |
| 1746453756        | 1941        | 1941        | Riot Squad                   | Riot Squad                   | Finney, Edward             | Edward Finney        | tt0034111        |
| 1746271328        | 1980        | 1979        | The Day Time Ended           | The Day Time Ended           | Cardos, John "Bud"         | John 'Bud' Cardos    | tt0080596        |
| 1746577396        | 1960        | 1960        | Cimarron                     | Cimarron                     | Mann, Anthony              | Anthony Mann         | tt0053715        |
| 1769969511        | 1911        | 1911        | Bar Z's New Cook             | Bar Z's New Cook             |                            | Thomas H. Ince       | tt0001807        |
| 1746410402        | 1990        | 1990        | I Come in Peace              | I Come in Peace              | Baxley, Craig R.           | Craig R. Baxley      | tt0099817        |
| 1769970640        | 1968        | 1968        | Like It Is                   | Like It Is                   | Rotsler, William           | William Rotsler      | tt0143392        |
| 1746508406        | 1925        | 1925        | A Fight to the Finish        | A Fight to the Finish        | Eason, Reeves              | B. Reeves Eason      | tt0015805        |
| 1745395382        | 2008        | 2008        | Appaloosa                    | Appaloosa                    | Harris, Ed                 | Ed Harris            | tt0800308        |
| 1746574760        | 1933        | 1933        | The Billion Dollar Scandal   | The Billion Dollar Scandal   | Brown, Harry Joe           | Harry Joe Brown      | tt0023811        |
| 1746465103        | 1945        | 1945        | Without Love                 | Without Love                 | Bucquet, Harold S.         | Harold S. Bucquet    | tt0038256        |
| 1746582220        | 1928        | 1928        | A Son of the Desert          | A Son of the Desert          | McCormick, William Merrill | Merrill McCormick    | tt0165487        |
| 1745302898        | 2006        | 2006        | Flannel Pajamas              | Flannel Pajamas              | Lipsky, Jeff               | Jeff Lipsky          | tt0432290        |
| 1746484436        | 1917        | 1917        | The Spindle of Life          | The Spindle of Life          | Cochrane, George           | George Cochrane      | tt0008616        |
| 1746474945        | 1944        | 1944        | Experiment Perilous          | Experiment Perilous          | Tourneur, Jacques          | Jacques Tourneur     | tt0036807        |
| 1746580542        | 1937        | 1937        | Oh, Doctor                   | Oh, Doctor                   | McCarey, Raymond B.        | Ray McCarey          | tt0029333        |
| 1746580371        | 1937        | 1937        | Harlem on the Prairie        | Harlem on the Prairie        | Newfield, Sam              | Sam Newfield         | tt0028978        |
| 1746503949        | 1918        | 1918        | De Luxe Annie                | De Luxe Annie                | West, Roland               | Roland West          | tt0008998        |
| 1746454662        | 1941        | 1941        | Harvard, Here I Come         | Harvard, Here I Come!        | Landers, Lew               | Lew Landers          | tt0034831        |
| 1746524609        | 1928        | 1928        | Lady Raffles                 | Lady Raffles                 | Neill, R. William          | Roy William Neill    | tt0019066        |
| 1746455194        | 1994        | 1994        | Miracle on 34th Street       | Miracle on 34th Street       | Mayfield, Les              | Les Mayfield         | tt0110527        |
| 1746184096        | 1910        | 1910        | A Change of Heart            | A Change of Heart            |                            |                      | tt1809217        |
| 1746520911        | 1950        | 1950        | Gunfire                      | Gunfire                      | Berke, William             | William Berke        | tt0042532        |
| 1746199227        | 1967        | 1967        | Doctor Dolittle              | Doctor Dolittle              | Fleischer, Richard         | Richard Fleischer    | tt0061584        |
| 1746420114        | 1994        | 1994        | A Great Day in Harlem        | A Great Day in Harlem        |                            | Jean Bach            | tt0109934        |
| 1746497079        | 1919        | 1919        | Injustice                    | Injustice                    | Peacocke, Leslie T.        | Leslie T. Peacocke   | tt4725198        |
| 1746523357        | 1915        | 1915        | The Yankee Girl              | The Yankee Girl              | Clark, J. J.               | J.J. Clark           | tt0006321        |
| 1746577464        | 1963        | 1962        | Stark Fear                   | Stark Fear                   | Hockman, Ned               | Ned Hockman          | tt0055478        |
| 1746420229        | 1994        | 1994        | Airheads                     | Airheads                     | Lehmann, Michael           | Michael Lehmann      | tt0109068        |
| 1746500674        | 1924        | 1925        | Soiled                       | Soiled                       | Windemere, Fred            | Fred Windemere       | tt0015350        |
| 1746235234        | 1974        | 1974        | Buster and Billie            | Buster and Billie            | Petrie, Daniel             | Daniel Petrie        | tt0071258        |
| 1746495826        | 1919        | 1919        | John Petticoats              | John Petticoats              | Hillyer, Lambert           | Lambert Hillyer      | tt0010314        |
| 1746560292        | 1964        | 1964        | Sleep                        | Sleep                        | Warhol, Andy               | Andy Warhol          | tt0187513        |
| 1769970611        | 1968        | 1968        | Scare Their Pants Off        | Scare Their Pants Off!       | Maddox, John               | John Maddox          | tt0063559        |
| 1746568173        | 1952        | 1952        | At Sword's Point             | At Sword's Point             | Allen, Lewis               | Lewis Allen          | tt0044380        |
| 1746501672        | 1915        | 1915        | Dora Thorne                  | Dora Thorne                  |                            | Lawrence Marston     | tt0005212        |
| 1746219212        | 1973        | 1973        | Blood Orgy of the She-Devils | Blood Orgy of the She Devils | Mikels, Ted V.             | Ted V. Mikels        | tt0068288        |
| 1746566053        | 1953        | 1953        | Shadows of Tombstone         | Shadows of Tombstone         | Witney, William            | William Witney       | tt0046302        |
| <b>1746437421</b> | <b>1944</b> | <b>1944</b> | <b>Atlantic City</b>         | <b>Atlantic City</b>         | <b>McCarey, Ray</b>        | <b>Ray McCarey</b>   | <b>tt0036619</b> |
| 1746580397        | 1937        | 1937        | Three Legionnaires           | Three Legionnaires           | MacFadden, Hamilton        | Hamilton MacFadden   | tt0029666        |
| 1746565932        | 1954        | 1954        | Security Risk                | Security Risk                | Schuster, Harold           | Harold D. Schuster   | tt0047465        |
| 1746569780        | 1958        | 1958        | Merry Andrew                 | Merry Andrew                 | Kidd, Michael              | Michael Kidd         | tt0051924        |
| 1746509476        | 1926        | 1926        | Mantrap                      | Mantrap                      | Fleming, Victor            | Victor Fleming       | tt0017119        |
| 1746580860        | 1935        | 1935        | The Good Fairy               | The Good Fairy               | Wylor, William             | William Wylor        | tt0026424        |
| 1746574824        | 1933        | 1933        | Fury of the Jungle           | Fury of the Jungle           | Neill, Roy William         | Roy William Neill    | tt0025155        |
| 1746566165        | 1954        | 1953        | Bad for Each Other           | Bad for Each Other           | Rapper, Irving             | Irving Rapper        | tt0045534        |
| 1746523238        | 1915        | 1915        | Temptation                   | Temptation                   | DeMille, Cecil B.          | Cecil B. DeMille     | tt0006140        |
| 1745375201        | 2010        | 2010        | Clash of the Titans          | Clash of the Titans          | Leterrier, Louis           | Louis Leterrier      | tt0800320        |
| 1746438307        | 1942        | 1942        | Her Cardboard Lover          | Her Cardboard Lover          | Cukor, George              | George Cukor         | tt0034846        |
| 1746574621        | 1933        | 1933        | Mama Loves Papa              | Mama Loves Papa              | McLeod, Norman             | Norman Z. McLeod     | tt0024292        |
| 1746454659        | 1946        | 1946        | The Dark Mirror              | The Dark Mirror              | Siodmak, Robert            | Robert Siodmak       | tt0038455        |
| 1746464858        | 1941        | 1941        | A Woman's Face               | A Woman's Face               | Cukor, George              | George Cukor         | tt0034399        |
| 1746520555        | 1950        | 1950        | Beauty on Parade             | Beauty on Parade             | Landers, Lew               | Lew Landers          | tt0042234        |
| 1746199211        | 1966        | 1966        | Love--My Way                 | Love: My Way                 | Hudson, Arch               | Arch Hudson          | tt0250538        |

|            |      |      |                                                  |                                             |                                    |                       |           |
|------------|------|------|--------------------------------------------------|---------------------------------------------|------------------------------------|-----------------------|-----------|
| 1746569832 | 1958 | 1958 | Harry Black and the Tiger                        | Harry Black and the Tiger                   | Fregonese, Hugo                    | Hugo Fregonese        | tt0051702 |
| 1746569763 | 1954 | 1954 | Down Three Dark Streets                          | Down Three Dark Streets                     | Laven, Arnold                      | Arnold Laven          | tt0046928 |
| 1746577669 | 1936 | 1936 | I'll Name the Murderer                           | I'll Name the Murderer                      | Johnson, Raymond K.                | Bernard B. Ray        | tt0182242 |
| 1746454790 | 1998 | 1998 | Dance with Me                                    | Dance with Me                               | Haines, Randa                      | Randa Haines          | tt0120576 |
| 1746571367 | 1933 | 1933 | What Price Innocence?                            | What Price Innocence?                       | Mack, Willard                      | Willard Mack          | tt0024761 |
| 1746503280 | 1919 | 1919 | Love's Prisoner                                  | Love's Prisoner                             | Dillon, Jack                       | John Francis Dillon   | tt0010402 |
| 1746574169 | 1959 | 1959 | Counterplot                                      | Counterplot                                 | Neumann, Kurt                      | Kurt Neumann          | tt0052707 |
| 1746219231 | 1975 | 1975 | Moonrunners                                      | Moonrunners                                 | Waldron, Gy                        | Gy Waldron            | tt0071854 |
| 1745341563 | 2001 | 2001 | The Shipping News                                | The Shipping News                           | Hallström, Lasse                   | Lasse Hallström       | tt0120824 |
| 1746577854 | 1937 | 1937 | Talent Scout                                     | Talent Scout                                | Clemens, William                   | William Clemens       | tt0029636 |
| 1746520769 | 1949 | 1949 | Stagecoach Kid                                   | Stagecoach Kid                              | Landers, Lew                       | Lew Landers           | tt0041915 |
| 1746580282 | 1936 | 1936 | Hearts Divided                                   | Hearts Divided                              | Borzage, Frank                     | Frank Borzage         | tt0027726 |
| 1746577214 | 1959 | 1959 | Never So Few                                     | Never So Few                                | Sturges, John                      | John Sturges          | tt0053108 |
| 1746525005 | 1923 | 1923 | Blood Test                                       | Blood Test                                  | Marquis, Don                       | Don Marquis           | tt0013875 |
| 1746508251 | 1927 | 1927 | Tearin' Into Trouble                             | Tearin' Into Trouble                        | Thorpe, Richard                    | Richard Thorpe        | tt0019449 |
| 1746497493 | 1917 | 1917 | The Warfare of the Flesh                         | The Warfare of the Flesh                    | Warren, Edward                     | Edward Warren         | tt0008750 |
| 1746235369 | 1974 | 1974 | Dirty Mary Crazy Larry                           | Dirty Mary Crazy Larry                      | Hough, John                        | John Hough            | tt0071424 |
| 1746502470 | 1915 | 1915 | Marrying Money                                   | Marrying Money                              | Young, James                       | James Young           | tt0005716 |
| 1746520369 | 1925 | 1925 | Flaming Waters                                   | Flaming Waters                              | Weight, F. Harmon                  | F. Harmon Weight      | tt0132960 |
| 1746514993 | 1910 | 1910 | The Musical Ranch                                | The Musical Ranch                           |                                    |                       | tt1080758 |
| 1746533207 | 1915 | 1915 | Body and Soul                                    | Body and Soul                               | Irving, George                     | George Irving         | tt0004988 |
| 1746394190 | 1982 | 1982 | The Slumber Party Massacre                       | The Slumber Party Massacre                  | Jones, Amy                         | Amy Holden Jones      | tt0084695 |
| 1746501361 | 1913 | 1913 | The Daughter of the Hills                        | The Daughter of the Hills                   | Dawley, J. Searle                  | J. Searle Dawley      | tt0002787 |
| 1746424231 | 1942 | 1942 | Larceny, Inc.                                    | Larceny, Inc.                               | Bacon, Lloyd                       | Lloyd Bacon           | tt0034965 |
| 1746524007 | 1910 | 1910 | The Smoker                                       | The Smoker                                  | Powell, Frank                      | Frank Powell          | tt0001399 |
| 1746577672 | 1933 | 1933 | Jaws of Justice                                  | Jaws of Justice                             | Bennet, Spencer Gordon             | Spencer Gordon Bennet | tt0024192 |
| 1746580581 | 1935 | 1935 | Manhattan Butterfly                              | Manhattan Butterfly                         | Collins, Lewis D.                  | Lewis D. Collins      | tt0025462 |
| 1746438212 | 1944 | 1944 | Barbary Coast Gent                               | Barbary Coast Gent                          | Del Ruth, Roy                      | Roy Del Ruth          | tt0036625 |
| 1746210231 | 1971 | 1971 | Believe in Me                                    | Believe in Me                               | Hagmann, Stuart; Avildsen, John G. | Stuart Hagmann        | tt0066822 |
| 1746566135 | 1954 | 1954 | Rear Window                                      | Rear Window                                 | Hitchcock, Alfred                  | Alfred Hitchcock      | tt0047396 |
| 1746438101 | 1998 | 1997 | Lolita                                           | Lolita                                      | Lyne, Adrian                       | Adrian Lyne           | tt0119558 |
| 1746491812 | 1946 | 1946 | The Walls Came Tumbling Down                     | The Walls Came Tumbling Down                | Mendes, Lothar                     | Lothar Mendes         | tt0039094 |
| 1746198553 | 1969 | 1969 | Rascal                                           | Rascal                                      | Tokar, Norman                      | Norman Tokar          | tt0064875 |
| 1746530758 | 1949 | 1949 | The Lady Takes a Sailor                          | The Lady Takes a Sailor                     | Curtiz, Michael                    | Michael Curtiz        | tt0041573 |
| 1746503549 | 1919 | 1919 | The Golden Shower                                | The Golden Shower                           | Noble, John W.                     | John W. Noble         | tt0010183 |
| 1746497866 | 1920 | 1920 | The Eternal Mother                               | The Eternal Mother                          | Davis, William                     | Will S. Davis         | tt0012137 |
| 1746410385 | 1984 | 1984 | Racing With the Moon                             | Racing with the Moon                        | Benjamin, Richard                  | Richard Benjamin      | tt0087968 |
| 1746503470 | 1921 | 1921 | The Greater Claim                                | The Greater Claim                           | Ruggles, Wesley                    | Wesley Ruggles        | tt0012241 |
| 1746569593 | 1957 | 1957 | Motorcycle Gang                                  | Motorcycle Gang                             | Cahn, Edward L.                    | Edward L. Cahn        | tt0050728 |
| 1746269632 | 1976 | 1976 | Lipstick                                         | Lipstick                                    | Johnson, Lamont                    | Lamont Johnson        | tt0074802 |
| 1746520488 | 1927 | 1927 | The Tired Business Man                           | The Tired Business Man                      | Dale, Allan                        | Allan Dale            | tt0018490 |
| 1746569933 | 1955 | 1954 | Masterson of Kansas                              | Masterson of Kansas                         | Castle, William                    | William Castle        | tt0048358 |
| 1746577564 | 1937 | 1937 | Tovarich                                         | Tovarich                                    | Litvak, Anatole                    | Anatole Litvak        | tt0029685 |
| 1746493842 | 1910 | 1910 | The Sanitarium                                   | The Sanitarium                              |                                    | Tom Santschi          | tt0132490 |
| 1746523240 | 1915 | 1915 | The Devil                                        | The Devil                                   |                                    | Reginald Barker       | tt0005193 |
| 1746208217 | 1965 | 1965 | Lord Jim                                         | Lord Jim                                    | Barker, Reginald; Ince, Thomas H.  | Reginald Barker       | tt0059399 |
| 1746562237 | 1953 | 1953 | The Farmer Takes a Wife                          | The Farmer Takes a Wife                     | Brooks, Richard                    | Richard Brooks        | tt0059399 |
| 1745342868 | 2003 | 2003 | Pieces of April                                  | Pieces of April                             | Levin, Henry                       | Henry Levin           | tt0045752 |
| 1746409940 | 1986 | 1986 | Deadtime Stories                                 | Deadtime Stories                            | Hedges, Peter                      | Peter Hedges          | tt0311648 |
| 1745293248 | 2007 | 2007 | The Assassination of Jesse James by the Coward F | The Assassination of Jesse James by the Cow | Delman, Jeffrey S.                 | Jeffrey Delman        | tt0092850 |
| 1746583077 | 1935 | 1935 | Mystery Woman                                    | Mystery Woman                               | Dominik, Andrew                    | Andrew Dominik        | tt0043680 |
| 1746474090 | 1946 | 1946 | Mr. Ace                                          | Mr. Ace                                     | Forde, Eugene                      | Eugene Forde          | tt0026757 |
| 1746569532 | 1953 | 1953 | Shane                                            | Shane                                       | Marin, Edwin L.                    | Edwin L. Marin        | tt0038752 |
| 1746502996 | 1915 | 1915 | The Heart of Jennifer                            | The Heart of Jennifer                       | Stevens, George                    | George Stevens        | tt0046303 |
| 1746508544 | 1927 | 1927 | Naughty Nanette                                  | Naughty Nanette                             | Kirkwood, James                    | James Kirkwood        | tt0005448 |
| 1746585407 | 1940 | 1940 | Pals of the Silver Sage                          | Pals of the Silver Sage                     | Meehan, James Leo                  | James Leo Meehan      | tt0018195 |
| 1746570386 | 1933 | 1933 | My Lips Betray                                   | My Lips Betray                              | Herman, Al                         | Albert Herman         | tt0032885 |
|            |      |      |                                                  |                                             | Blystone, John                     | John G. Blystone      | tt0024363 |

|            |      |      |                               |                               |                                  |                                     |           |
|------------|------|------|-------------------------------|-------------------------------|----------------------------------|-------------------------------------|-----------|
| 1746497676 | 1920 | 1920 | The Good-Bad Wife             | The Good Bad Wife             | DeVonde, Chester                 | Vera McCord                         | tt0012233 |
| 1746394535 | 1985 | 1984 | Trancers                      | Trancers                      | Band, Charles                    | Charles Band                        | tt0090192 |
| 1746569622 | 1958 | 1958 | The Barbarian and the Geisha  | The Barbarian and the Geisha  | Huston, John                     | John Huston                         | tt0051398 |
| 1746523979 | 1910 | 1910 | The Ranch Girl's Legacy       | The Ranch Girl's Legacy       |                                  | Gilbert M. 'Broncho Billy' Anderson | tt0001372 |
| 1745358663 | 2003 | 2003 | Big Fish                      | Big Fish                      | Burton, Tim                      | Tim Burton                          | tt0319061 |
| 1746439156 | 1942 | 1942 | The Palm Beach Story          | The Palm Beach Story          | Sturges, Preston                 | Preston Sturges                     | tt0035169 |
| 1746454237 | 1942 | 1941 | The Shanghai Gesture          | The Shanghai Gesture          | Sternberg, Josef von             | Josef von Sternberg                 | tt0034175 |
| 1746580256 | 1938 | 1938 | Battle of Broadway            | Battle of Broadway            | Marshall, George                 | George Marshall                     | tt0029902 |
| 1746256825 | 1979 | 1979 | Summer Camp                   | Summer Camp                   | Vincent, Chuck                   | Chuck Vincent                       | tt0079965 |
| 1746561305 | 1955 | 1955 | The Night of the Hunter       | The Night of the Hunter       | Laughton, Charles                | Charles Laughton                    | tt0048424 |
| 1745293454 | 2006 | 2006 | Miami Vice                    | Miami Vice                    | Mann, Michael                    | Michael Mann                        | tt0430357 |
| 1746515831 | 1921 | 1921 | The Gunsaulus Mystery         | The Gunsaulus Mystery         | Micheaux, Oscar                  | Oscar Micheaux                      | tt0133825 |
| 1746580363 | 1936 | 1936 | Along Came Love               | Along Came Love               | Lytell, Bert                     | Bert Lytell                         | tt0027279 |
| 1746513635 | 1910 | 1910 | A Mohawk's Way                | A Mohawk's Way                | Griffith, D. W.                  | D.W. Griffith                       | tt0001327 |
| 1746423348 | 2000 | 2000 | The Gift                      | The Gift                      | Raimi, Sam                       | Sam Raimi                           | tt0219699 |
| 1746503679 | 1921 | 1921 | Hail the Woman                | Hail the Woman                | Wray, John Griffith              | John Griffith Wray                  | tt0012248 |
| 1746219623 | 1971 | 1971 | Pretty Maids All in a Row     | Pretty Maids All in a Row     | Vadim, Roger                     | Roger Vadim                         | tt0067610 |
| 1746497005 | 1920 | 1920 | Just Pals                     | Just Pals                     | Ford, Jack                       | John Ford                           | tt0011358 |
| 1746467695 | 1917 | 1917 | The Raggedy Queen             | The Raggedy Queen             | Marston, Theodore                | Theodore Marston                    | tt0008490 |
| 1746579008 | 1950 | 1950 | The Showdown                  | The Showdown                  | McGowan, Dorrell; McGowan, Stuar | Dorrell McGowan                     | tt0042957 |
| 1746584136 | 1935 | 1935 | Loser's End                   | Loser's End                   | Ray, B. B.                       | Bernard B. Ray                      | tt0026650 |
| 1746210350 | 1971 | 1971 | McCabe & Mrs. Miller          | McCabe & Mrs. Miller          | Altman, Robert                   | Robert Altman                       | tt0067411 |
| 1746500045 | 1924 | 1924 | The Whirlwind Ranger          | The Whirlwind Ranger          | Hatton, Richard                  | Dick Hatton                         | tt0179515 |
| 1746550000 | 1954 | 1954 | The Other Woman               | The Other Woman               | Haas, Hugo                       | Hugo Haas                           | tt0047317 |
| 1746514906 | 1927 | 1927 | Alias the Lone Wolf           | Alias the Lone Wolf           | Griffith, Edward H.              | Edward H. Griffith                  | tt0017599 |
| 1746500536 | 1923 | 1923 | Haldane of the Secret Service | Haldane of the Secret Service | Houdini, Harry                   | Harry Houdini                       | tt0014112 |
| 1746503683 | 1920 | 1920 | Thou Art the Man              | Thou Art the Man              | Heffron, Thomas N.               | Thomas N. Heffron                   | tt0011766 |
| 1746420523 | 1988 | 1988 | The Seventh Sign              | The Seventh Sign              | Schultz, Carl                    | Carl Schultz                        | tt0096073 |
| 1746520669 | 1925 | 1925 | Heartless Husbands            | Heartless Husbands            | Bracken, Bertram                 | Bertram Bracken                     | tt0134709 |
| 1746419376 | 1993 | 1993 | Lost in Yonkers               | Lost in Yonkers               | Coolidge, Martha                 | Martha Coolidge                     | tt0107443 |
| 1746578050 | 1935 | 1935 | Lottery Lover                 | The Lottery Lover             | Thiele, William                  | Wilhelm Thiele                      | tt0026653 |
| 1746580781 | 1938 | 1938 | Radio City Revels             | Radio City Revels             | Stoloff, Ben                     | Benjamin Stoloff                    | tt0030651 |
| 1746485936 | 1918 | 1918 | The Wolf and His Mate         | The Wolf and His Mate         | LeSaint, E. J.                   | Edward LeSaint                      | tt0008784 |
| 1745374321 | 2002 | 2002 | K-19: The Widowmaker          | K 19: The Widowmaker          | Bigelow, Kathryn                 | Kathryn Bigelow                     | tt0267626 |
| 1746454490 | 1942 | 1942 | The Strange Case of Doctor Rx | The Strange Case of Doctor Rx | Nigh, William                    | William Nigh                        | tt0035386 |
| 1746576986 | 1958 | 1958 | Wolf Larsen                   | Wolf Larsen                   | Jones, Harmon                    | Harmon Jones                        | tt0052402 |
| 1746455175 | 1998 | 1998 | Deep Impact                   | Deep Impact                   | Leder, Mimi                      | Mimi Leder                          | tt0120647 |
| 1745272333 | 2000 | 1999 | The Woman Chaser              | The Woman Chaser              | Devor, Robinson                  | Robinson Devor                      | tt0217894 |
| 1746578830 | 1963 | 1963 | Europe in the Raw             | Europe in the Raw             | Meyer, Russ                      | Russ Meyer                          | tt0057047 |
| 1746523414 | 1916 | 1916 | Love's Pilgrimage to America  | Love's Pilgrimage to America  | Marston, Lawrence                | Lawrence Marston                    | tt0005658 |
| 1746503046 | 1923 | 1923 | Finger Prints                 | Finger Prints                 | Levering, Joseph                 | Joseph Levering                     | tt0325380 |
| 1746199827 | 1969 | 1969 | Popi                          | Popi                          | Hiller, Arthur                   | Arthur Hiller                       | tt0064827 |
| 1746235864 | 1975 | 1975 | The Black Gestapo             | The Black Gestapo             | Frost, Lee                       | Lee Frost                           | tt0169620 |
| 1746570315 | 1952 | 1952 | It Grows on Trees             | It Grows on Trees             | Lubin, Arthur                    | Arthur Lubin                        | tt0044758 |
| 1746474137 | 1945 | 1945 | The Shanghai Cobra            | The Shanghai Cobra            | Karlson, Phil                    | Phil Karlson                        | tt0038080 |
| 1746438314 | 1942 | 1942 | In Old California             | In Old California             | McGann, William                  | William C. McGann                   | tt0034889 |
| 1746514524 | 1910 | 1910 | That Chink at Golden Gulch    | That Chink at Golden Gulch    | Griffith, D. W.                  | D.W. Griffith                       | tt0001414 |
| 1746581205 | 1910 | 1910 | A Game of Hearts              | A Game of Hearts              |                                  |                                     | tt0449270 |
| 1746233823 | 1966 | 1966 | Blood Bath                    | Blood Bath                    | Hill, Jack; Rothman, Stephanie   | Jack Hill                           | tt0060174 |
| 1746499994 | 1924 | 1924 | The Desert Hawk               | The Desert Hawk               | De La Mothe, Leon                | Leon De La Mothe                    | tt0014842 |
| 1746408699 | 1984 | 1983 | Cold Feet                     | Cold Feet                     | Van Dusen, Bruce                 | Bruce Van Dusen                     | tt0087070 |
| 1746508381 | 1925 | 1925 | Tearin' Loose                 | Tearin' Loose                 | Thorpe, Richard                  | Richard Thorpe                      | tt0016412 |
| 1746560144 | 1964 | 1964 | Get Yourself a College Girl   | Get Yourself a College Girl   | Miller, Sidney                   | Sidney Miller                       | tt0161612 |
| 1746585271 | 1930 | 1930 | Parade of the West            | Parade of the West            | Brown, Harry J.                  | Harry Joe Brown                     | tt0021230 |
| 1746520361 | 1924 | 1924 | Icebound                      | Icebound                      | de Mille, William                | William C. de Mille                 | tt0015008 |
| 1746584015 | 1939 | 1939 | Stagecoach                    | Stagecoach                    | Ford, John                       | John Ford                           | tt0031971 |
| 1746569979 | 1960 | 1960 | The Crowded Sky               | The Crowded Sky               | Pevney, Joseph                   | Joseph Pevney                       | tt0053742 |

|            |      |      |                                    |                                    |                                    |                                     |           |
|------------|------|------|------------------------------------|------------------------------------|------------------------------------|-------------------------------------|-----------|
| 1746512206 | 1927 | 1927 | Aflame in the Sky                  | Aflame in the Sky                  | McGowan, J. P.                     | J.P. McGowan                        | tt0017591 |
| 1746555342 | 1955 | 1955 | Running Wild                       | Running Wild                       | Biberman, Abner                    | Abner Biberman                      | tt0048571 |
| 1746497924 | 1920 | 1920 | The Thirteenth Commandment         | The Thirteenth Commandment         | Vignola, Robert G.                 | Robert G. Vignola                   | tt0011764 |
| 1746566068 | 1953 | 1952 | Off Limits                         | Off Limits                         | Marshall, George                   | George Marshall                     | tt0046138 |
| 1746503052 | 1922 | 1922 | The Golden Gallows                 | The Golden Gallows                 | Scardon, Paul                      | Paul Scardon                        | tt0013190 |
| 1746582618 | 1937 | 1937 | Rich Relations                     | Rich Relations                     | Sanforth, Clifford                 | Clifford Sanforth                   | tt0029483 |
| 1746504368 | 1919 | 1919 | A Man's Duty                       | A Man's Duty                       | Gant, Harry A.; Thomas, D. Ireland | Harry A. Gant                       | tt0010431 |
| 1745359793 | 2002 | 2002 | Hart's War                         | Hart's War                         | Hoblit, Gregory                    | Gregory Hoblit                      | tt0251114 |
| 1746575022 | 1933 | 1933 | Revenge at Monte Carlo             | Revenge at Monte Carlo             | Eason, Breezy                      | B. Reeves Eason                     | tt0024497 |
| 1746508481 | 1925 | 1925 | Back to Life                       | Back to Life                       | Bennett, Whitman                   | Whitman Bennett                     | tt0015591 |
| 1745341861 | 2010 | 2010 | Yearley                            | Yearley                            | Michaels, Heath C.                 | Heath C. Michaels                   | tt1329330 |
| 1746248794 | 1974 | 1974 | Black Samson                       | Black Samson                       | Bail, Charles                      | Charles Bail                        | tt0071226 |
| 1746560870 | 1932 | 1932 | The Phantom Express                | The Phantom Express                | Johnson, Emory                     | Emory Johnson                       | tt0023333 |
| 1746486305 | 1917 | 1917 | The Barrier                        | The Barrier                        | Lewis, Edgar                       | Edgar Lewis                         | tt0007684 |
| 1746496070 | 1920 | 1920 | Other Men's Shoes                  | Other Men's Shoes                  | Lewis, Edgar                       | Edgar Lewis                         | tt0196815 |
| 1746570372 | 1934 | 1934 | The House of Mystery               | House of Mystery                   | Nigh, William                      | William Nigh                        | tt0025271 |
| 1746561598 | 1954 | 1954 | Out of This World                  | Out of This World                  | Thomas, Lowell; Thomas, Lowell     |                                     | tt0282822 |
| 1746512926 | 1913 | 1913 | Ivanhoe                            | Ivanhoe                            | Brenon, Herbert                    | Herbert Brenon                      | tt0003022 |
| 1746410602 | 1983 | 1983 | Abuse                              | Abuse                              | Bressan, Arthur J.                 | Arthur J. Bressan Jr.               | tt0083517 |
| 1746270046 | 1980 | 1980 | The Exterminator                   | The Exterminator                   | Glickenhau, James                  | James Glickenhau                    | tt0080707 |
| 1746569555 | 1958 | 1958 | Onionhead                          | Onionhead                          | Taurog, Norman                     | Norman Taurog                       | tt0052030 |
| 1746465321 | 1942 | 1941 | Sullivan's Travels                 | Sullivan's Travels                 | Sturges, Preston                   | Preston Sturges                     | tt0034240 |
| 1746186079 | 1969 | 1969 | Last Summer                        | Last Summer                        | Perry, Frank                       | Frank Perry                         | tt0064573 |
| 1746235193 | 1975 | 1975 | Race with the Devil                | Race with the Devil                | Starrett, Jack                     | Jack Starrett                       | tt0073600 |
| 1746233485 | 1967 | 1967 | Chuka                              | Chuka                              | Douglas, Gordon                    | Gordon Douglas                      | tt0061477 |
| 1745272746 | 2000 | 2000 | Reindeer Games                     | Reindeer Games                     | Frankenheimer, John                | John Frankenheimer                  | tt0184858 |
| 1746420978 | 1995 | 1995 | Dracula: Dead and Loving It        | Dracula: Dead and Loving It        | Brooks, Mel                        | Mel Brooks                          | tt0112896 |
| 1746577205 | 1951 | 1951 | Silver City                        | Silver City                        | Haskin, Byron                      | Byron Haskin                        | tt0044036 |
| 1746569621 | 1953 | 1953 | Song of the Land                   | Song of the Land                   | Kesler, Henry S.                   | Henry S. Kesler                     | tt0358707 |
| 1746523333 | 1916 | 1916 | The Weakness of Strength           | The Weakness of Strength           | Revier, Harry                      | Harry Revier                        | tt0007546 |
| 1745372646 | 2008 | 2008 | Choke                              | Choke                              | Gregg, Clark                       | Clark Gregg                         | tt1024715 |
| 1746487730 | 1921 | 1921 | A Perfect Crime                    | A Perfect Crime                    | Dwan, Allan                        | Allan Dwan                          | tt0012565 |
| 1746507825 | 1925 | 1925 | The Beautiful City                 | The Beautiful City                 | Webb, Kenneth                      | Kenneth S. Webb                     | tt0015608 |
| 1746514431 | 1915 | 1915 | The Moth and the Flame             | The Moth and the Flame             | Olcott, Sidney                     | Sidney Olcott                       | tt0005773 |
| 1746566120 | 1958 | 1958 | The Female Animal                  | The Female Animal                  | Keller, Harry                      | Harry Keller                        | tt0050385 |
| 1746574228 | 1960 | 1959 | The Atomic Submarine               | The Atomic Submarine               | Bennet, Spencer G.                 | Spencer Gordon Bennet               | tt0052587 |
| 1746408457 | 1989 | 1989 | The Mighty Quinn                   | The Mighty Quinn                   | Schenkel, Carl                     | Carl Schenkel                       | tt0097880 |
| 1746509548 | 1926 | 1926 | Eve's Leaves                       | Eve's Leaves                       | Sloane, Paul                       | Paul Sloane                         | tt0016827 |
| 1746501788 | 1916 | 1916 | Black Friday                       | Black Friday                       | Carleton, Lloyd B.                 | Lloyd B. Carleton                   | tt0006433 |
| 1746575006 | 1934 | 1934 | Crime Without Passion              | Crime Without Passion              | Hecht, Ben; MacArthur, Charles     | Ben Hecht                           | tt0025009 |
| 1746423322 | 1999 | 1999 | Sleepy Hollow                      | Sleepy Hollow                      | Burton, Tim                        | Tim Burton                          | tt0162661 |
| 1746520730 | 1949 | 1949 | Challenge of the Range             | Challenge of the Range             | Nazarro, Ray                       | Ray Nazarro                         | tt0041237 |
| 1746533214 | 1916 | 1916 | Is Any Girl Safe?                  | Is Any Girl Safe?                  | Jaccard, Jacques                   | Jacques Jaccard                     | tt0006871 |
| 1746574156 | 1963 | 1963 | Wall of Noise                      | Wall of Noise                      | Wilson, Richard                    | Richard Wilson                      | tt0057667 |
| 1746569542 | 1955 | 1955 | Tennessee's Partner                | Tennessee's Partner                | Dwan, Allan                        | Allan Dwan                          | tt0048707 |
| 1746483874 | 1919 | 1919 | Love Insurance                     | Love Insurance                     | Crisp, Donald                      | Donald Crisp                        | tt0010396 |
| 1746491797 | 1946 | 1946 | Renegade Girl                      | Renegade Girl                      | Berke, William                     | William Berke                       | tt0038877 |
| 1769969352 | 1964 | 1964 | Olga's Girls                       | Olga's Girls                       | Mawra, Joseph P.                   | Joseph P. Mawra                     | tt0058427 |
| 1746514428 | 1914 | 1914 | The Corsair                        | The Corsair                        | Powell, Frank                      | Frank Powell                        | tt0003795 |
| 1746553708 | 1965 | 1965 | The Art of Love                    | The Art of Love                    | Jewison, Norman                    | Norman Jewison                      | tt0058920 |
| 1746501160 | 1916 | 1916 | Her Greatest Story                 | Her Greatest Story                 |                                    | Lynn Reynolds                       | tt0326931 |
| 1746423826 | 1941 | 1941 | Outlaws of the Desert              | Outlaws of the Desert              | Bretherton, Howard                 | Howard Bretherton                   | tt0033989 |
| 1746562456 | 1954 | 1954 | Yankee Pasha                       | Yankee Pasha                       | Pevney, Joseph                     | Joseph Pevney                       | tt0047684 |
| 1746524031 | 1910 | 1910 | The Millionaire and the Ranch Girl | The Millionaire and the Ranch Girl |                                    | Gilbert M. 'Broncho Billy' Anderson | tt0001322 |
| 1746582250 | 1931 | 1931 | Night Nurse                        | Night Nurse                        | Wellman, William A.                | William A. Wellman                  | tt0022208 |
| 1746578047 | 1937 | 1937 | Life Begins in College             | Life Begins in College             | Seiter, William A.                 | William A. Seiter                   | tt0029144 |
| 1746513402 | 1910 | 1910 | Stung!                             | Stung!                             |                                    |                                     | tt0449403 |

|            |      |      |                            |                            |                             |                        |           |
|------------|------|------|----------------------------|----------------------------|-----------------------------|------------------------|-----------|
| 1746543066 | 1916 | 1916 | The Measure of a Man       | The Measure of a Man       | Conway, Jack                | Jack Conway            | tt0007050 |
| 1746453493 | 1941 | 1941 | Riders of the Badlands     | Riders of the Badlands     | Bretherton, Howard          | Howard Bretherton      | tt0034103 |
| 1746523052 | 1916 | 1916 | The Captive God            | The Captive God            | Swickard, Charles           | Charles Swickard       | tt0006489 |
| 1746583879 | 1930 | 1930 | Hunted Men                 | The Hunted Men             | McGowan, J. P.              | J.P. McGowan           | tt0020991 |
| 1746582330 | 1930 | 1930 | The Poor Millionaire       | The Poor Millionaire       | Melford, George             | George Melford         | tt0021266 |
| 1746424598 | 1941 | 1941 | Flying Blind               | Flying Blind               | McDonald, Frank             | Frank McDonald         | tt0033611 |
| 1746585050 | 1928 | 1928 | Flash of the Forest        | The Flash of the Forest    |                             |                        | tt0169910 |
| 1746578652 | 1963 | 1963 | Bell, Bare and Beautiful   | Bell, Bare and Beautiful   | Gordon, Lewis H.            | Herschell Gordon Lewis | tt0056863 |
| 1746585145 | 1930 | 1930 | Strictly Modern            | Strictly Modern            | Seiter, William A.          | William A. Seiter      | tt0021421 |
| 1746570997 | 1934 | 1935 | The Silver Bullet          | The Silver Bullet          | Ray, B. B.                  | Bernard B. Ray         | tt0026999 |
| 1746573047 | 1932 | 1932 | Central Park               | Central Park               | Adolfi, John G.             | John G. Adolfi         | tt0022751 |
| 1746409803 | 1988 | 1988 | Married to the Mob         | Married to the Mob         | Demme, Jonathan             | Jonathan Demme         | tt0095593 |
| 1746210018 | 1971 | 1971 | The Beguiled               | The Beguiled               | Siegel, Donald              | Don Siegel             | tt0066819 |
| 1746563025 | 1951 | 1951 | The Great Caruso           | The Great Caruso           | Thorpe, Richard             | Richard Thorpe         | tt0043599 |
| 1746561322 | 1956 | 1956 | World Without End          | World Without End          | Bernds, Edward              | Edward Berndts         | tt0049964 |
| 1769970770 | 1912 | 1912 | The Jocular Winds of Fate  | The Jocular Winds of Fate  |                             | Van Dyke Brooke        | tt0222066 |
| 1746580766 | 1938 | 1937 | Thrill of a Lifetime       | Thrill of a Lifetime       | Archainbaud, George         | George Archainbaud     | tt0029668 |
| 1746570820 | 1934 | 1934 | Babes in Toyland           | Babes in Toyland           | Meins, Gus; Rogers, Charles | Gus Meins              | tt0024852 |
| 1746577628 | 1937 | 1937 | Nancy Steele Is Missing!   | Nancy Steele Is Missing!   | Marshall, George            | George Marshall        | tt0029292 |
| 1746509223 | 1925 | 1925 | The Crimson Runner         | The Crimson Runner         | Forman, Tom                 | Tom Forman             | tt0015715 |
| 1746216754 | 1967 | 1967 | The Reluctant Astronaut    | The Reluctant Astronaut    | Montagne, Edward J.         | Edward Montagne        | tt0062190 |
| 1746567244 | 1952 | 1952 | No Holds Barred            | No Holds Barred            | Beaudine, William           | William Beaudine       | tt0044969 |
| 1746501166 | 1923 | 1923 | The Nth Commandment        | The Nth Commandment        | Borzage, Frank              | Frank Borzage          | tt0014322 |
| 1746500055 | 1923 | 1923 | Golden Silence             | Golden Silence             | Hurst, Paul                 | Paul Hurst             | tt0013192 |
| 1746574133 | 1962 | 1962 | A Girl Named Tamiko        | A Girl Named Tamiko        | Sturges, John               | John Sturges           | tt0056021 |
| 1746491993 | 1948 | 1948 | Caged Fury                 | Caged Fury                 | Berke, William              | William Berke          | tt0040196 |
| 1746184852 | 1965 | 1965 | Scream of the Butterfly    | Scream of the Butterfly    | Lobato, Ebar                | Eber Lobato            | tt0059688 |
| 1746585401 | 1939 | 1939 | Frontier Marshal           | Frontier Marshal           | Dwan, Allan                 | Allan Dwan             | tt0031346 |
| 1746233008 | 1969 | 1969 | The Satin Mushroom         | The Satin Mushroom         | Brown, Don                  | Don Brown              | tt0138076 |
| 1746453516 | 1944 | 1944 | The Ghost That Walks Alone | The Ghost That Walks Alone | Landers, Lew                | Lew Landers            | tt0036863 |
| 1746216690 | 1968 | 1968 | Lady in Cement             | Lady in Cement             | Douglas, Gordon             | Gordon Douglas         | tt0063210 |
| 1746219705 | 1976 | 1976 | Midway                     | Midway                     | Smight, Jack                | Jack Smight            | tt0074899 |
| 1746571079 | 1935 | 1934 | West of the Pecos          | West of the Pecos          | Rosen, Phil                 | Phil Rosen             | tt0025971 |
| 1746409029 | 1982 | 1982 | Pandemonium                | Pandemonium                | Sole, Alfred                | Alfred Sole            | tt0084464 |
| 1746581959 | 1930 | 1930 | What a Widow               | What a Widow!              | Dwan, Allan                 | Allan Dwan             | tt0021545 |
| 1746394395 | 1983 | 1983 | Gorky Park                 | Gorky Park                 | Apted, Michael              | Michael Apted          | tt0085615 |
| 1746568263 | 1952 | 1952 | Babes in Bagdad            | Babes in Bagdad            | Ulmer, Edgar G.             | Jerónimo Mihura        | tt0044389 |
| 1746453811 | 1943 | 1943 | Two Señoritas from Chicago | Two Señoritas from Chicago | Woodruff, Frank             | Frank Woodruff         | tt0036466 |
| 1746503403 | 1919 | 1919 | The Echo of Youth          | The Echo of Youth          | Abramson, Ivan              | Ivan Abramson          | tt0010081 |
| 1746584431 | 1939 | 1939 | For Love or Money          | For Love or Money          | Rogell, Albert S.           | Albert S. Rogell       | tt0031328 |
| 1746393982 | 1984 | 1984 | The Natural                | The Natural                | Levinson, Barry             | Barry Levinson         | tt0087781 |
| 1746520402 | 1925 | 1925 | Western Promise            | Western Promise            |                             |                        | tt0177388 |
| 1746520088 | 1949 | 1949 | Bride for Sale             | Bride for Sale             | Russell, William D.         | William D. Russell     | tt0041208 |
| 1769976141 | 1927 | 1927 | Campus Romeos              | Campus Romeos              | Herman, Albert              | Gilbert Pratt          | tt0423942 |
| 1746582336 | 1928 | 1928 | Across to Singapore        | Across to Singapore        | Nigh, William               | William Nigh           | tt0018618 |
| 1746570147 | 1933 | 1933 | Fast Workers               | Fast Workers               | Browning, Tod               | Tod Browning           | tt0024005 |
| 1746492050 | 1947 | 1947 | The Spirit of West Point   | The Spirit of West Point   | Murphy, Ralph               | Ralph Murphy           | tt0039858 |
| 1746524962 | 1915 | 1915 | The Wonderful Adventure    | The Wonderful Adventure    | Thomson, Frederick          | Frederick A. Thomson   | tt0006311 |
| 1746419359 | 1990 | 1990 | Alice                      | Alice                      | Allen, Woody                | Woody Allen            | tt0099012 |
| 1746466696 | 1917 | 1917 | Pay Me                     | Pay Me!                    | De Grasse, Joseph           | Joseph De Grasse       | tt0008417 |
| 1746583571 | 1931 | 1931 | Trapped                    | Trapped                    | Mitchell, Bruce             | Kurt Neumann           | tt0134160 |
| 1746578945 | 1962 | 1962 | Nature's Playmates         | Nature's Playmates         | Gordon, Lewis H.            | Herschell Gordon Lewis | tt0056273 |
| 1746520656 | 1927 | 1927 | Night Life                 | Night Life                 | Archainbaud, George         | George Archainbaud     | tt0018202 |
| 1746576862 | 1931 | 1931 | The Virtuous Husband       | The Virtuous Husband       | Moore, Vin                  | Vin Moore              | tt0022539 |
| 1746580312 | 1934 | 1934 | Let's Be Ritzy             | Let's Be Ritzy             | Ludwig, Edward              | Edward Ludwig          | tt0025380 |
| 1746524610 | 1922 | 1922 | Don't Write Letters        | Don't Write Letters        | Baker, George D.            | George D. Baker        | tt0013082 |
| 1746575809 | 1931 | 1930 | Under Suspicion            | Under Suspicion            | Erickson, A. F.             | A.F. Erickson          | tt0021501 |

|            |      |      |                              |                              |                                     |                     |           |
|------------|------|------|------------------------------|------------------------------|-------------------------------------|---------------------|-----------|
| 1745358520 | 2009 | 2009 | Watchmen                     | Watchmen                     | Snyder, Zack                        | Zack Snyder         | tt0409459 |
| 1746566360 | 1954 | 1954 | Duel in the Jungle           | Duel in the Jungle           | Marshall, George                    | George Marshall     | tt0046942 |
| 1746577717 | 1933 | 1933 | Christopher Strong           | Christopher Strong           | Arzner, Dorothy                     | Dorothy Arzner      | tt0023891 |
| 1746491746 | 1947 | 1947 | The Brasher Doubloon         | The Brasher Doubloon         | Brahm, John                         | John Brahm          | tt0039217 |
| 1746487150 | 1919 | 1919 | The Lone Wolf's Daughter     | The Lone Wolf's Daughter     | Earle, William P. S.                | William P. S. Earle | tt0010378 |
| 1746421742 | 1993 | 1993 | Short Cuts                   | Short Cuts                   | Altman, Robert                      | Robert Altman       | tt0108122 |
| 1746503345 | 1920 | 1920 | The Week-End                 | The Week End                 | Cox, George L.                      | George L. Cox       | tt0011844 |
| 1746571129 | 1952 | 1952 | This Woman Is Dangerous      | This Woman Is Dangerous      | Feist, Felix                        | Felix E. Feist      | tt0045232 |
| 1746503995 | 1920 | 1920 | Her Story                    | Her Story                    | Samuelson, G. B.; Carrick, Allyn B. | Alexander Butler    | tt0140146 |
| 1745342637 | 2009 | 2009 | Humpday                      | Humpday                      | Shelton, Lynn                       | Lynn Shelton        | tt1334537 |
| 1746566088 | 1958 | 1958 | Paris Holiday                | Paris Holiday                | Oswald, Gerd                        | Gerd Oswald         | tt0052047 |
| 1746578542 | 1960 | 1960 | Sergeant Rutledge            | Sergeant Rutledge            | Ford, John                          | John Ford           | tt0054292 |
| 1746514421 | 1916 | 1916 | The Diamond Runners          | The Diamond Runners          | McGowan, J. P.                      | J.P. McGowan        | tt0157538 |
| 1746464994 | 1947 | 1947 | The Romance of Rosy Ridge    | The Romance of Rosy Ridge    | Rowland, Roy                        | Roy Rowland         | tt0039783 |
| 1746577395 | 1951 | 1951 | Sugarfoot                    | Sugarfoot                    | Marin, Edwin L.                     | Edwin L. Marin      | tt0044087 |
| 1746573949 | 1963 | 1963 | The Caretakers               | The Caretakers               | Bartlett, Hall                      | Hall Bartlett       | tt0056908 |
| 1746251182 | 1976 | 1976 | Norman...Is That You?        | Norman... Is That You?       | Schlatter, George                   | George Schlatter    | tt0074973 |
| 1746485237 | 1917 | 1917 | The Slave Market             | The Slave Market             | Ford, Hugh                          | Hugh Ford           | tt0182427 |
| 1746554452 | 1964 | 1964 | Your Cheatin' Heart          | Your Cheatin' Heart          | Nelson, Gene                        | Gene Nelson         | tt0058765 |
| 1746577726 | 1934 | 1934 | Murder on the Blackboard     | Murder on the Blackboard     | Archainbaud, George                 | George Archainbaud  | tt0025532 |
| 1746578065 | 1938 | 1938 | Josette                      | Josette                      | Dwan, Allan                         | Allan Dwan          | tt0030291 |
| 1746573937 | 1958 | 1958 | South Seas Adventure         | South Seas Adventure         |                                     | Carl Dudley         | tt0052226 |
| 1746569901 | 1954 | 1954 | The Forty-Niners             | The Forty Niners             | Carr, Thomas                        | Thomas Carr         | tt0122072 |
| 1746569573 | 1957 | 1957 | Love in the Afternoon        | Love in the Afternoon        | Wilder, Billy                       | Billy Wilder        | tt0050658 |
| 1746499852 | 1950 | 1950 | A Lady Without Passport      | A Lady Without Passport      | Lewis, Joseph H.                    | Joseph H. Lewis     | tt0042664 |
| 1746409454 | 1981 | 1981 | Four Friends                 | Four Friends                 | Penn, Arthur                        | Arthur Penn         | tt0082404 |
| 1746524736 | 1916 | 1916 | The Silent Battle            | The Silent Battle            | Conway, Jack                        | Jack Conway         | tt0007346 |
| 1746560527 | 1932 | 1932 | Lone Trail                   | The Lone Trail               | Webb, Harry S.; Douglas, Forrest    | Forrest Sheldon     | tt0030359 |
| 1746566354 | 1954 | 1954 | The Lawless Rider            | The Lawless Rider            | Canutt, Yakima                      | Yakima Canutt       | tt0047164 |
| 1746453596 | 1943 | 1943 | Action in the North Atlantic | Action in the North Atlantic | Bacon, Lloyd                        | Lloyd Bacon         | tt0035608 |
| 1746570861 | 1934 | 1934 | The Mysterious Mr. Wong      | The Mysterious Mr. Wong      | Nigh, William                       | William Nigh        | tt0026755 |
| 1746434278 | 1999 | 1999 | The Mod Squad                | The Mod Squad                | Silver, Scott                       | Scott Silver        | tt0120757 |
| 1746209564 | 1965 | 1965 | The Reward                   | The Reward                   | Bourguignon, Serge                  | Serge Bourguignon   | tt0059651 |
| 1746520373 | 1926 | 1926 | The Fighting Peacemaker      | The Fighting Peacemaker      | Smith, Clifford S.                  | Clifford Smith      | tt0016865 |
| 1746454162 | 1999 | 1999 | Light It Up                  | Light It Up                  | Bolotin, Craig                      | Craig Bolotin       | tt0172726 |
| 1746394668 | 1988 | 1988 | Dangerous Liaisons           | Dangerous Liaisons           | Frears, Stephen                     | Stephen Frears      | tt0094947 |
| 1746248154 | 1967 | 1967 | The Taming of the Shrew      | The Taming of the Shrew      | Zeffirelli, Franco                  | Franco Zeffirelli   | tt0061407 |
| 1746422128 | 1998 | 1998 | Rush Hour                    | Rush Hour                    | Ratner, Brett                       | Brett Ratner        | tt0120812 |
| 1746583989 | 1939 | 1939 | Keep Punching                | Keep Punching                | Clein, John                         | John Clein          | tt0135501 |
| 1746584832 | 1929 | 1929 | The Carnation Kid            | The Carnation Kid            | Hopper, E. Mason                    | E. Mason Hopper     | tt0019753 |
| 1746508686 | 1924 | 1924 | Fighter's Paradise           | Fighter's Paradise           | Neitz, Alvin J.                     | Alan James          | tt0014890 |
| 1769976188 | 1927 | 1927 | Crazy to Act                 | Crazy to Act                 | Rodney, Earle                       | Earle Rodney        | tt0246538 |
| 1746507794 | 1926 | 1926 | Memory Lane                  | Memory Lane                  | Stahl, John M.                      | John M. Stahl       | tt0017132 |
| 1745359530 | 2003 | 2003 | Girls Will Be Girls          | Girls Will Be Girls          | Day, Richard                        | Richard Day         | tt0339071 |
| 1746516145 | 1922 | 1922 | The Song of Life             | The Song of Life             | Stahl, John M.                      | John M. Stahl       | tt0013311 |
| 1746515265 | 1918 | 1918 | Two-Gun Betty                | Two Gun Betty                | Hickman, Howard                     | Howard C. Hickman   | tt0190100 |
| 1746578666 | 1963 | 1963 | Drums of Africa              | Drums of Africa              | Clark, James B.                     | James B. Clark      | tt0057015 |
| 1746465074 | 1942 | 1942 | Down Rio Grande Way          | Down Rio Grande Way          | Berke, William                      | William Berke       | tt0034676 |
| 1746515298 | 1921 | 1921 | Blind Hearts                 | Blind Hearts                 | Lee, Rowland V.                     | Rowland V. Lee      | tt0011978 |
| 1746584174 | 1936 | 1936 | End of the Trail             | End of the Trail             | Kenton, Erle C.                     | Erle C. Kenton      | tt0027573 |
| 1746520179 | 1925 | 1925 | Beyond the Border            | Beyond the Border            | Dunlap, Scott R.                    | Scott R. Dunlap     | tt0015620 |
| 1746520482 | 1925 | 1925 | Two Fisted Jones             | Two Fisted Jones             | Sedgwick, Edward                    | Edward Sedgwick     | tt0016466 |
| 1746584341 | 1936 | 1936 | The Arizona Raiders          | The Arizona Raiders          | Hogan, James                        | James P. Hogan      | tt0027308 |
| 1745357619 | 2008 | 2008 | Yes Man                      | Yes Man                      | Reed, Peyton                        | Peyton Reed         | tt1068680 |
| 1746574796 | 1933 | 1933 | Flying Down to Rio           | Flying Down to Rio           | Freeland, Thornton                  | Thornton Freeland   | tt0024025 |
| 1746581871 | 1951 | 1951 | Only the Valiant             | Only the Valiant             | Douglas, Gordon                     | Gordon Douglas      | tt0043885 |
| 1746217384 | 1967 | 1967 | Guess Who's Coming to Dinner | Guess Who's Coming to Dinner | Kramer, Stanley                     | Stanley Kramer      | tt0061735 |



|            |      |      |                                            |                                            |                                 |                                     |           |
|------------|------|------|--------------------------------------------|--------------------------------------------|---------------------------------|-------------------------------------|-----------|
| 1746501256 | 1914 | 1913 | Uncle Tom's Cabin                          | Uncle Tom's Cabin                          | Daly, William Robert            | Otis Turner                         | tt0201287 |
| 1746562433 | 1954 | 1954 | The Human Jungle                           | The Human Jungle                           | Newman, Joseph M.               | Joseph M. Newman                    | tt0047102 |
| 1746532498 | 1916 | 1916 | The Return of Eve                          | The Return of Eve                          | Berthelet, Arthur               | Arthur Berthelet                    | tt0158894 |
| 1745303184 | 2006 | 2006 | Vajra Sky Over Tibet                       | Vajra Sky Over Tibet                       | Bush, John                      | John Bush                           | tt0840019 |
| 1746422037 | 1997 | 1996 | Ratchet                                    | Ratchet                                    | Johnson, John S.                | John Johnson                        | tt0117443 |
| 1746420871 | 1983 | 1982 | The Entity                                 | The Entity                                 | Furie, Sidney J.                | Sidney J. Furie                     | tt0082334 |
| 1746566179 | 1957 | 1957 | My Man Godfrey                             | My Man Godfrey                             | Koster, Henry                   | Henry Koster                        | tt0050738 |
| 1746570224 | 1934 | 1934 | Spitfire                                   | Spitfire                                   | Cromwell, John                  | John Cromwell                       | tt0025822 |
| 1745282911 | 2006 | 2006 | Blood Diamond                              | Blood Diamond                              | Zwick, Edward                   | Edward Zwick                        | tt0450259 |
| 1746499975 | 1925 | 1925 | Lorraine of the Lions                      | Lorraine of the Lions                      | Sedgwick, Edward                | Edward Sedgwick                     | tt0016038 |
| 1746410352 | 1990 | 1990 | Stella                                     | Stella                                     | Erman, John                     | John Erman                          | tt0100691 |
| 1746512368 | 1914 | 1914 | The Boer War                               | The Boer War                               | Melford, George                 | George Melford                      | tt0003686 |
| 1746577535 | 1933 | 1933 | She Done Him Wrong                         | She Done Him Wrong                         | Sherman, Lowell                 | Lowell Sherman                      | tt0024548 |
| 1746492593 | 1946 | 1946 | Renegades                                  | Renegades                                  | Sherman, George                 | George Sherman                      | tt0038878 |
| 1746436533 | 1941 | 1941 | Free and Easy                              | Free and Easy                              | Sidney, George; Buzzell, Edward | George Sidney                       | tt0033634 |
| 1746424593 | 1943 | 1943 | Dangerous Blondes                          | Dangerous Blondes                          | Jason, Leigh                    | Leigh Jason                         | tt0035779 |
| 1746572572 | 1910 | 1910 | The Eternal Triangle                       | The Eternal Triangle                       |                                 | Harry Solter                        | tt0200620 |
| 1746560725 | 1932 | 1932 | The Riding Tornado                         | The Riding Tornado                         | Lederman, D. Ross               | D. Ross Lederman                    | tt0023402 |
| 1746270781 | 1980 | 1980 | Without Warning                            | Without Warning                            | Clark, Greydon                  | Greydon Clark                       | tt0081764 |
| 1746210857 | 1973 | 1973 | White Lightning                            | White Lightning                            | Sargent, Joseph                 | Joseph Sargent                      | tt0070915 |
| 1746465139 | 1944 | 1944 | The Black Parachute                        | The Black Parachute                        | Landers, Lew                    | Lew Landers                         | tt0036648 |
| 1746453570 | 1943 | 1943 | Hit Parade of 1943                         | Hit Parade of 1943                         | Rogell, Albert S.               | Albert S. Rogell                    | tt0035727 |
| 1746533171 | 1915 | 1915 | The Disciple                               | The Disciple                               | Hart, William S.                | William S. Hart                     | tt0005200 |
| 1746496817 | 1920 | 1920 | The Girl in the Web                        | The Girl in the Web                        | Thornby, Robert                 | Robert Thornby                      | tt0011231 |
| 1746560010 | 1963 | 1963 | The Victors                                | The Victors                                | Foreman, Carl                   | Carl Foreman                        | tt0057652 |
| 1746582434 | 1938 | 1938 | Under the Big Top                          | Under the Big Top                          | Brown, Karl                     | Karl Brown                          | tt0030911 |
| 1746516352 | 1919 | 1919 | The Lord Loves the Irish                   | The Lord Loves the Irish                   | Warde, Ernest C.                | Ernest C. Warde                     | tt0191251 |
| 1746569816 | 1957 | 1957 | Desk Set                                   | Desk Set                                   | Lang, Walter                    | Walter Lang                         | tt0050307 |
| 1746514811 | 1915 | 1915 | Always in the Way                          | Always in the Way                          | Dawley, J. Searle               | J. Searle Dawley                    | tt0004885 |
| 1746420522 | 1992 | 1992 | Incident at Oglala                         | Incident at Oglala                         | Apted, Michael                  | Michael Apted                       | tt0104504 |
| 1746509299 | 1927 | 1927 | Painted Ponies                             | Painted Ponies                             | Eason, Reeves                   | B. Reeves Eason                     | tt0018248 |
| 1746261332 | 1978 | 1978 | Grease                                     | Grease                                     | Kleiser, Randal                 | Randal Kleiser                      | tt0077631 |
| 1746584195 | 1939 | 1939 | Blind Alley                                | Blind Alley                                | Vidor, Charles                  | Charles Vidor                       | tt0031104 |
| 1746420983 | 1997 | 1997 | The Apostle                                | The Apostle                                | Duvall, Robert                  | Robert Duvall                       | tt0118632 |
| 1746183906 | 1910 | 1910 | The Bad Man and the Preacher               | The Bad Man and the Preacher               |                                 | Gilbert M. 'Broncho Billy' Anderson | tt0372159 |
| 1746532461 | 1916 | 1916 | The Lash of Destiny                        | The Lash of Destiny                        | Terwilliger, George             | George Terwilliger                  | tt0163046 |
| 1769971964 | 1969 | 1969 | Gutter Trash                               | Gutter Trash                               | Milligan, Andy                  | Andy Milligan                       | tt0219724 |
| 1745303083 | 2007 | 2006 | Jack Smith and the Destruction of Atlantis | Jack Smith and the Destruction of Atlantis | Jordan, Mary                    | Mary Jordan                         | tt0795406 |
| 1746454009 | 1944 | 1944 | Between Two Worlds                         | Between Two Worlds                         | Blatt, Edward A.                | Edward A. Blatt                     | tt0036641 |
| 1746583898 | 1930 | 1930 | Double Cross Roads                         | Double Cross Roads                         | Werker, Alfred L.               | George E. Middleton                 | tt0020837 |
| 1746583742 | 1930 | 1930 | Code of Honor                              | Code of Honor                              | McGowan, J. P.                  | J.P. McGowan                        | tt0020774 |
| 1746273708 | 1978 | 1978 | Jennifer                                   | Jennifer                                   | Mack, Brice                     | Brice Mack                          | tt0077769 |
| 1746577140 | 1958 | 1957 | Escape from Red Rock                       | Escape from Red Rock                       | Bernds, Edward                  | Edward Bernds                       | tt0051590 |
| 1746500431 | 1949 | 1949 | Miss Grant Takes Richmond                  | Miss Grant Takes Richmond                  | Bacon, Lloyd                    | Lloyd Bacon                         | tt0041652 |
| 1746565939 | 1954 | 1953 | War Arrow                                  | War Arrow                                  | Sherman, George                 | George Sherman                      | tt0046532 |
| 1746496120 | 1919 | 1919 | A Midnight Romance                         | A Midnight Romance                         | Weber, Lois                     | Lois Weber                          | tt0010461 |
| 1746475534 | 1947 | 1947 | The Flame                                  | The Flame                                  | Auer, John H.                   | John H. Auer                        | tt0039386 |
| 1746580379 | 1938 | 1938 | The Last Stand                             | The Last Stand                             | Lewis, Joseph H.                | Joseph H. Lewis                     | tt0030346 |
| 1746508942 | 1926 | 1926 | While London Sleeps                        | While London Sleeps                        | Bretherton, H. P.               | Howard Bretherton                   | tt0017548 |
| 1746475998 | 1946 | 1946 | Affairs of Geraldine                       | Affairs of Geraldine                       | Blair, George                   | George Blair                        | tt0038290 |
| 1746577820 | 1938 | 1938 | Fugitives for a Night                      | Fugitives for a Night                      | Goodwins, Leslie                | Leslie Goodwins                     | tt0030162 |
| 1746455324 | 1995 | 1995 | Unzipped                                   | Unzipped                                   | Keeve, Douglas                  | Douglas Keeve                       | tt0114805 |
| 1746554581 | 1965 | 1965 | Once Upon a Coffee House                   | Once Upon a Coffee House                   | Traube, Shepard                 | Shepard Traube                      | tt0234388 |
| 1746514603 | 1917 | 1917 | Draft 258                                  | Draft 258                                  | Cabanne, William Christy        | Christy Cabanne                     | tt0009024 |
| 1746219185 | 1972 | 1972 | Night of the Lepus                         | Night of the Lepus                         | Claxton, William F.             | William F. Claxton                  | tt0069005 |
| 1769971150 | 1969 | 1969 | The Ecstasies of Women                     | The Ecstasies of Women                     | Hansen, Mark                    | Herschell Gordon Lewis              | tt0064278 |
| 1746500272 | 1925 | 1925 | Braveheart                                 | Braveheart                                 | Hale, Alan                      | Alan Hale                           | tt0015643 |

|                   |             |             |                                  |                                  |                                     |                      |                  |
|-------------------|-------------|-------------|----------------------------------|----------------------------------|-------------------------------------|----------------------|------------------|
| 1746394472        | 1987        | 1987        | Rumpelstiltskin                  | Rumpelstiltskin                  | Irving, David                       | David Irving         | tt0093891        |
| 1745294002        | 2006        | 2006        | 16 Blocks                        | 16 Blocks                        | Donner, Richard                     | Richard Donner       | tt0450232        |
| 1746474809        | 1948        | 1948        | The Girl from Manhattan          | The Girl from Manhattan          | Green, Alfred E.                    | Alfred E. Green      | tt0040388        |
| 1746555644        | 1954        | 1954        | Rogue Cop                        | Rogue Cop                        | Rowland, Roy                        | Roy Rowland          | tt0047424        |
| 1746503956        | 1922        | 1922        | Through the Storm                | Through the Storm                | Plympton, Horace G.                 | Horace G. Plympton   | tt0170681        |
| 1746576992        | 1961        | 1961        | Honeymoon of Terror              | Honeymoon of Terror              | Peri                                | Peter Perry Jr.      | tt0173908        |
| 1746500161        | 1924        | 1923        | Love Letters                     | The Love Letter                  | Soloman, David                      | King Baggot          | tt0014217        |
| 1769970063        | 1912        | 1912        | The Lie                          | The Lie                          | Baggot, King; Daly, W. R.           | King Baggot          | tt0339297        |
| 1746579029        | 1951        | 1951        | The Thundering Trail             | The Thundering Trail             | Ormond, Ron                         | Ron Ormond           | tt0044129        |
| 1746455323        | 1998        | 1998        | The Opposite of Sex              | The Opposite of Sex              | Roos, Don                           | Don Roos             | tt0120777        |
| 1745359982        | 2002        | 2002        | The Hot Chick                    | The Hot Chick                    | Brady, Tom                          | Tom Brady            | tt0302640        |
| 1746584181        | 1938        | 1938        | Dangerous to Know                | Dangerous to Know                | Florey, Robert                      | Robert Florey        | tt0030039        |
| 1746562214        | 1954        | 1954        | Border River                     | Border River                     | Sherman, George                     | George Sherman       | tt0046800        |
| <b>1746520602</b> | <b>1925</b> | <b>1925</b> | <b>White Thunder</b>             | <b>White Thunder</b>             | <b>Wilson, Ben</b>                  | <b>Ben F. Wilson</b> | <b>tt0127974</b> |
| 1746234408        | 1967        | 1967        | Hells Angels on Wheels           | Hells Angels on Wheels           | Rush, Richard                       | Richard Rush         | tt0061758        |
| 1746567760        | 1933        | 1933        | Let's Fall in Love               | Let's Fall in Love               | Burton, David                       | David Burton         | tt0025381        |
| 1746573851        | 1960        | 1960        | Comanche Station                 | Comanche Station                 | Boetticher, Budd                    | Budd Boetticher      | tt0053729        |
| 1746574825        | 1938        | 1938        | The Duke Is Tops                 | The Duke Is Tops                 | Nolte, William                      | William L. Nolte     | tt0030089        |
| 1746503813        | 1920        | 1921        | Greater Than Love                | Greater Than Love                | Stahl, John M.                      | Fred Niblo           | tt0012242        |
| 1746422633        | 1993        | 1993        | What's Love Got to Do with It    | What's Love Got to Do with It    | Gibson, Brian                       | Brian Gibson         | tt0108551        |
| 1746570118        | 1933        | 1933        | Her Splendid Folly               | Her Splendid Folly               | O'Connor, William                   | William A. O'Connor  | tt0024114        |
| 1746584381        | 1940        | 1940        | All This, and Heaven Too         | All This, and Heaven Too         | Litvak, Anatole                     | Anatole Litvak       | tt0032194        |
| 1745293198        | 2006        | 2006        | Unaccompanied Minors             | Unaccompanied Minors             | Feig, Paul                          | Paul Feig            | tt0488658        |
| 1746509356        | 1949        | 1949        | The Fighting Kentuckian          | The Fighting Kentuckian          | Waggnar, George                     | George Waggnar       | tt0041361        |
| 1746580421        | 1937        | 1937        | Something to Sing About          | Something to Sing About          | Schertzing, Victor                  | Victor Schertzing    | tt0029588        |
| 1746514123        | 1923        | 1923        | The Covered Schooner             | The Covered Schooner             | Edwards, Harry                      | Harry Edwards        | tt0246534        |
| 1746455237        | 2000        | 1999        | Held Up                          | Held Up                          | Rash, Steve                         | Steve Rash           | tt0165831        |
| 1746573787        | 1956        | 1956        | Crime in the Streets             | Crime in the Streets             | Siegel, Don                         | Don Siegel           | tt0049107        |
| 1746500815        | 1914        | 1914        | A Gentleman from Mississippi     | A Gentleman from Mississippi     | Sargent, George L.                  | George L. Sargent    | tt0004006        |
| 1746573781        | 1958        | 1958        | The Cool and the Crazy           | The Cool and the Crazy           | Witney, William                     | William Witney       | tt0051488        |
| 1746582856        | 1936        | 1936        | Born to Dance                    | Born to Dance                    | Del Ruth, Roy                       | Roy Del Ruth         | tt0027387        |
| 1746583100        | 1935        | 1935        | Wild Mustang                     | Wild Mustang                     | Fraser, Harry                       | Harry L. Fraser      | tt0027217        |
| 1746584425        | 1939        | 1939        | On Your Toes                     | On Your Toes                     | Enright, Ray                        | Ray Enright          | tt0031756        |
| 1746504162        | 1922        | 1922        | One Wonderful Night              | One Wonderful Night              | Paton, Stuart                       | Stuart Paton         | tt0013464        |
| 1746508091        | 1925        | 1925        | Kit Carson Over the Great Divide | Kit Carson Over the Great Divide | Mattison, Frank S.                  | Frank S. Mattison    | tt0015981        |
| 1746569602        | 1958        | 1958        | Jet Attack                       | Jet Attack                       | Cahn, Edward L.                     | Edward L. Cahn       | tt0051797        |
| 1746530705        | 1949        | 1949        | Madame Bovary                    | Madame Bovary                    | Minnelli, Vincente                  | Vincente Minnelli    | tt0041615        |
| 1746436371        | 1943        | 1943        | Corvette K-225                   | Corvette K 225                   | Rosson, Richard                     | Richard Rosson       | tt0035757        |
| 1745358902        | 2009        | 2008        | Phoebe in Wonderland             | Phoebe in Wonderland             | Barnz, Daniel                       | Daniel Barnz         | tt1034325        |
| 1746503440        | 1917        | 1917        | The Lad and the Lion             | The Lad and the Lion             | Green, Alfred                       | Alfred E. Green      | tt0008165        |
| 1746523849        | 1917        | 1917        | Greed                            | Greed                            | Marston, Theodore                   | Theodore Marston     | tt0175685        |
| 1746208260        | 1969        | 1969        | Once You Kiss a Stranger         | Once You Kiss a Stranger...      | Sparr, Robert                       | Robert Sparr         | tt0064760        |
| 1745272043        | 2000        | 2000        | The Next Best Thing              | The Next Best Thing              | Schlesinger, John                   | John Schlesinger     | tt0156841        |
| 1746524984        | 1915        | 1915        | The Final Judgment               | The Final Judgment               | Carewe, Edwin                       | Edwin Carewe         | tt0005326        |
| 1746570439        | 1933        | 1933        | Hell and High Water              | Hell and High Water              | Jones, Grover; McNutt, William Slav | Grover Jones         | tt0024101        |
| 1745372899        | 2008        | 2008        | The Love Guru                    | The Love Guru                    | Schnabel, Marco                     | Marco Schnabel       | tt0811138        |
| 1746532423        | 1917        | 1917        | The Heir of the Ages             | Heir of the Ages                 | Le Saint, Edward J.                 | Edward LeSaint       | tt0008064        |
| 1746499950        | 1948        | 1948        | Who Killed Doc Robbin            | Who Killed Doc Robbin?           | Carr, Bernard                       | Bernard Carr         | tt0040966        |
| 1746520040        | 1924        | 1924        | Safe and Sane                    | Safe and Sane                    | Beaudine, Harold                    | Harold Beaudine      | tt0229693        |
| 1746523848        | 1916        | 1916        | The Sunbeam                      | The Sunbeam                      | Carewe, Edwin                       | Edwin Carewe         | tt0159006        |
| 1746508719        | 1927        | 1927        | Rookies                          | Rookies                          | Wood, Sam                           | Sam Wood             | tt0018338        |
| 1746502819        | 1915        | 1915        | Carmen                           | Carmen                           | Walsh, Raoul A.                     | Cecil B. DeMille     | tt0005060        |
| 1746581139        | 1961        | 1961        | X-15                             | X 15                             | Donner, Richard D.                  | Richard Donner       | tt0055627        |
| 1746577742        | 1936        | 1936        | Absolute Quiet                   | Absolute Quiet                   | Seitz, George B.                    | George B. Seitz      | tt0027250        |
| 1746433703        | 1995        | 1995        | Born to Be Wild                  | Born to Be Wild                  | Gray, John                          | John Gray            | tt0113533        |
| 1746524511        | 1910        | 1910        | Love and Money                   | Love and Money                   |                                     | Fred J. Balshofer    | tt0359620        |
| 1746584019        | 1936        | 1937        | Galloping Dynamite               | Galloping Dynamite               | Fraser, Harry                       | Harry L. Fraser      | tt0132990        |

|            |      |      |                                    |                                    |                                       |                         |           |
|------------|------|------|------------------------------------|------------------------------------|---------------------------------------|-------------------------|-----------|
| 1746502581 | 1915 | 1915 | A Mother's Confession              | A Mother's Confession              | Abramson, Ivan                        | Ivan Abramson           | tt0005775 |
| 1745373726 | 2003 | 2003 | A Good Night to Die                | A Good Night to Die                | Singer, Craig                         | Craig Singer            | tt0203536 |
| 1745359318 | 2004 | 2004 | Before Sunset                      | Before Sunset                      | Linklater, Richard                    | Richard Linklater       | tt0381681 |
| 1746533230 | 1915 | 1915 | The Ploughshare                    | The Ploughshare                    | Collins, John H.                      | John H. Collins         | tt0005904 |
| 1746583063 | 1937 | 1937 | Mile-a-Minute-Love                 | Mile a Minute Love                 | Clifton, Elmer                        | Elmer Clifton           | tt0029244 |
| 1746474465 | 1948 | 1948 | Campus Sleuth                      | Campus Sleuth                      | Jason, Will                           | Will Jason              | tt0040208 |
| 1746577465 | 1962 | 1962 | The Shameless                      | The Shameless                      | Martin, Jay                           | Joel Holt               | tt0230763 |
| 1745372558 | 2010 | 2010 | When in Rome                       | When in Rome                       | Johnson, Mark Steven                  | Mark Steven Johnson     | tt1185416 |
| 1746422294 | 1998 | 1998 | Jack Frost                         | Jack Frost                         | Miller, Troy                          | Troy Miller             | tt0141109 |
| 1746509185 | 1926 | 1926 | Speeding Through                   | Speeding Through                   | Bracken, Bertram                      | Bertram Bracken         | tt0166359 |
| 1746520776 | 1925 | 1925 | Fair Play                          | Fair Play                          | Crane, Frank                          | Frank Hall Crane        | tt0131376 |
| 1745358504 | 2010 | 2010 | It's Kind of a Funny Story         | It's Kind of a Funny Story         | Fleck, Ryan; Boden, Anna              | Anna Boden              | tt0804497 |
| 1746424444 | 1940 | 1940 | Wildcat Bus                        | Wildcat Bus                        | Woodruff, Frank                       | Frank Woodruff          | tt0033265 |
| 1746520284 | 1927 | 1927 | Out of the Past                    | Out of the Past                    | Fitzgerald, Dallas M.                 | Dallas M. Fitzgerald    | tt0018241 |
| 1746453793 | 1942 | 1942 | The Falcon's Brother               | The Falcon's Brother               | Logan, Stanley                        | Stanley Logan           | tt0034717 |
| 1746574967 | 1936 | 1935 | Widow from Monte Carlo             | The Widow from Monte Carlo         | Collins, Arthur Greville              | Arthur Greville Collins | tt0027215 |
| 1745340054 | 2002 | 2001 | The Lost Skeleton of Cadavra       | The Lost Skeleton of Cadavra       | Blamire, Larry                        | Larry Blamire           | tt0307109 |
| 1746496767 | 1919 | 1919 | Gates of Brass                     | Gates of Brass                     | Warde, Ernest C.                      | Ernest C. Warde         | tt0010156 |
| 1746235083 | 1977 | 1977 | Annie Hall                         | Annie Hall                         | Allen, Woody                          | Woody Allen             | tt0075686 |
| 1746409925 | 1990 | 1990 | Far Out Man                        | Far Out Man                        | Chong, Tommy                          | Tommy Chong             | tt0099546 |
| 1746580487 | 1935 | 1935 | Women Must Dress                   | Women Must Dress                   | Barker, Reginald                      | Reginald Barker         | tt0027229 |
| 1746501894 | 1910 | 1910 | Thief                              | The Thief                          |                                       | Tom Ricketts            | tt1705958 |
| 1746453580 | 1940 | 1940 | Saturday's Children                | Saturday's Children                | Sherman, Vincent                      | Vincent Sherman         | tt0033024 |
| 1746581304 | 1910 | 1910 | John Halifax, Gentleman            | John Halifax, Gentleman            |                                       | Theodore Marston        | tt0339224 |
| 1746274205 | 1980 | 1980 | Bronco Billy                       | Bronco Billy                       | Eastwood, Clint                       | Clint Eastwood          | tt0080472 |
| 1746501217 | 1915 | 1915 | The High Road                      | The High Road                      | Noble, John W.                        | John W. Noble           | tt0137814 |
| 1746583775 | 1930 | 1930 | Love Comes Along                   | Love Comes Along                   | Julian, Rupert                        | Rupert Julian           | tt0021097 |
| 1746504566 | 1917 | 1917 | The Little Samaritan               | The Little Samaritan               | Levering, Joseph                      | Joseph Levering         | tt0219134 |
| 1746520171 | 1949 | 1949 | Make Mine Laughs                   | Make Mine Laughs                   | Fleischer, Richard O.                 | Richard Fleischer       | tt0041621 |
| 1746465062 | 1945 | 1945 | Mexicana                           | Mexicana                           | Santell, Alfred                       | Alfred Santell          | tt0037909 |
| 1746497243 | 1918 | 1918 | The Deciding Kiss                  | The Deciding Kiss                  | Browning, Tod                         | Tod Browning            | tt0009001 |
| 1746545314 | 1940 | 1940 | Girls Under 21                     | Girls Under 21                     | Nosseck, Max                          | Max Nosseck             | tt0032529 |
| 1746524053 | 1923 | 1923 | Salomy Jane                        | Salomy Jane                        | Melford, George                       | George Melford          | tt0014431 |
| 1746492444 | 1944 | 1944 | Trail to Gunsight                  | Trail to Gunsight                  | Keays, Vernon                         | Vernon Keays            | tt0037391 |
| 1745372583 | 2010 | 2010 | The Next Three Days                | The Next Three Days                | Haggis, Paul                          | Paul Haggis             | tt1458175 |
| 1746582932 | 1935 | 1935 | False Pretenses                    | False Pretenses                    | Lamont, Charles                       | Charles Lamont          | tt0026333 |
| 1746554308 | 1964 | 1964 | Vengeance                          | Vengeance                          | Hilyard, Dene                         | Dene Hilyard            | tt0058717 |
| 1746584396 | 1939 | 1939 | Whispering Enemies                 | Whispering Enemies                 | Collins, Lewis D.                     | Lewis D. Collins        | tt0032127 |
| 1745341587 | 2010 | 2010 | Predators                          | Predators                          | Antal, Nimród                         | Nimród Antal            | tt1424381 |
| 1746574747 | 1935 | 1935 | Show Them No Mercy!                | Show Them No Mercy!                | Marshall, George                      | George Marshall         | tt0026992 |
| 1746514554 | 1914 | 1914 | Forgiven; or, the Jack of Diamonds | Forgiven; Or, The Jack of Diamonds | Daly, William Robert                  | William Robert Daly     | tt0003987 |
| 1746573692 | 1910 | 1910 | A Colonial Belle                   | A Colonial Belle                   |                                       | Sidney Olcott           | tt0393164 |
| 1746514362 | 1916 | 1916 | Cured                              | Cured                              | Metcalf, Earl                         | Earl Metcalfe           | tt0429922 |
| 1746562039 | 1955 | 1955 | Creature with the Atom Brain       | Creature with the Atom Brain       | Cahn, Edward L.                       | Edward L. Cahn          | tt0047960 |
| 1746524492 | 1915 | 1915 | The Reward                         | The Reward                         | Barker, Reginald                      | Reginald Barker         | tt0005964 |
| 1746577992 | 1938 | 1938 | Flight to Fame                     | Flight to Fame                     | Coleman, C. C.                        | Charles C. Coleman      | tt0030141 |
| 1746454852 | 1944 | 1944 | Adventure in Music                 | Adventure in Music                 | Matray, Ernst; Winston, S. K.; LeBorg | Reginald Le Borg        | tt0240323 |
| 1746514570 | 1914 | 1914 | Thirty Leagues Under the Sea       | Thirty Leagues Under the Sea       | Gregory, Carl L.                      | Carl Gregory            | tt0004690 |
| 1746438297 | 1941 | 1941 | The Bad Man                        | The Bad Man                        | Thorpe, Richard                       | Richard Thorpe          | tt0033368 |
| 1746455645 | 1996 | 1996 | Big Bully                          | Big Bully                          | Miner, Steve                          | Steve Miner             | tt0115676 |
| 1746424388 | 1942 | 1942 | Today I Hang                       | Today I Hang                       | Merrick, Geo. M.; Drake, Oliver       | Oliver Drake            | tt0035448 |
| 1746582703 | 1938 | 1937 | Mama Runs Wild                     | Mama Runs Wild                     | Staub, Ralph                          | Ralph Staub             | tt0029195 |
| 1746569512 | 1954 | 1954 | Bengal Brigade                     | Bengal Brigade                     | Benedek, Laslo                        | Laslo Benedek           | tt0046767 |
| 1746256208 | 1980 | 1980 | Falling in Love Again              | Falling in Love Again              | Paul, Steven                          | Steven Paul             | tt0080714 |
| 1746572964 | 1932 | 1932 | Secrets of the French Police       | Secrets of the French Police       | Sutherland, Edward                    | A. Edward Sutherland    | tt0023447 |
| 1746504406 | 1918 | 1918 | Heredity                           | Heredity                           | Earle, William P. S.                  | William P.S. Earle      | tt0184565 |
| 1746436370 | 1940 | 1940 | Ellery Queen, Master Detective     | Ellery Queen, Master Detective     | Neumann, Kurt                         | Kurt Neumann            | tt0032438 |

|            |      |      |                                                    |                                                    |                                |                      |           |
|------------|------|------|----------------------------------------------------|----------------------------------------------------|--------------------------------|----------------------|-----------|
| 1769969338 | 1931 | 1931 | House of Mystery                                   | House of Mystery                                   | Neumann, Kurt                  | Kurt Neumann         | tt0135457 |
| 1746574022 | 1962 | 1962 | Advise & Consent                                   | Advise & Consent                                   | Preminger, Otto                | Otto Preminger       | tt0055728 |
| 1746474953 | 1947 | 1947 | The Law Comes to Gunsight                          | The Law Comes to Gunsight                          | Hillyer, Lambert               | Lambert Hillyer      | tt0039557 |
| 1746474083 | 1947 | 1947 | Philo Vance's Gamble                               | Philo Vance's Gamble                               | Wrangell, Basil                | Basil Wrangell       | tt0039702 |
| 1746500714 | 1926 | 1926 | The Two-Gun Man                                    | The Two Gun Man                                    | Kirkland, David                | David Kirkland       | tt0017495 |
| 1746504070 | 1920 | 1920 | The Miracle of Money                               | The Miracle of Money                               | Henley, Hobart                 | Hobart Henley        | tt0011466 |
| 1746520786 | 1949 | 1949 | The Lawton Story                                   | The Lawton Story                                   | Beaudine, William              | William Beaudine     | tt0043936 |
| 1746555744 | 1955 | 1955 | Lord of the Jungle                                 | Lord of the Jungle                                 | Beebe, Ford                    | Ford Beebe           | tt0048314 |
| 1746530717 | 1949 | 1949 | Home of the Brave                                  | Home of the Brave                                  | Robson, Mark                   | Mark Robson          | tt0041481 |
| 1746580376 | 1935 | 1935 | Outlaw Rule                                        | Outlaw Rule                                        | Luby, S. Roy                   | S. Roy Luby          | tt0026837 |
| 1746465193 | 1942 | 1942 | Sleepytime Gal                                     | Sleepytime Gal                                     | Rogell, Albert S.              | Albert S. Rogell     | tt0035344 |
| 1746569594 | 1953 | 1953 | Three Sailors and a Girl                           | Three Sailors and a Girl                           | Del Ruth, Roy                  | Roy Del Ruth         | tt0046424 |
| 1746504109 | 1921 | 1921 | The Invisible Fear                                 | The Invisible Fear                                 | Carewe, Edwin                  | Edwin Carewe         | tt0012319 |
| 1746581376 | 1910 | 1910 | The Little Preacher                                | The Little Preacher                                |                                | William F. Haddock   | tt2239164 |
| 1746503305 | 1919 | 1919 | Coax Me                                            | Coax Me                                            |                                | Gilbert P. Hamilton  | tt0247253 |
| 1746583567 | 1931 | 1931 | The Single Sin                                     | The Single Sin                                     | Hamilton, Gilbert              | Gilbert P. Hamilton  | tt0022388 |
| 1745357703 | 2008 | 2008 | Good Dick                                          | Good Dick                                          | Nigh, William                  | William Nigh         | tt0044101 |
| 1746582570 | 1938 | 1938 | Shine on Harvest Moon                              | Shine on Harvest Moon                              | Palka, Marianna                | Marianna Palka       | tt0030742 |
| 1746576965 | 1963 | 1962 | Daughter of the Sun God                            | Daughter of the Sun God                            | Kane, Joe                      | Joseph Kane          | tt0055891 |
| 1746465397 | 1947 | 1947 | Killer Dill                                        | Killer Dill                                        | Herts, Kenneth                 | Kenneth Hartford     | tt0039530 |
| 1746453642 | 1941 | 1941 | The Trial of Mary Dugan                            | The Trial of Mary Dugan                            | Collins, Lewis D.              | Lewis D. Collins     | tt0034311 |
| 1746520544 | 1927 | 1927 | Uneasy Payments                                    | Uneasy Payments                                    | McLeod, Norman Z.              | Norman Z. McLeod     | tt0175281 |
| 1746578959 | 1951 | 1951 | Leave It to the Marines                            | Leave It to the Marines                            | Kirkland, David                | David Kirkland       | tt0043730 |
| 1746453632 | 1941 | 1941 | Kansas Cyclone                                     | Kansas Cyclone                                     | Newfield, Samuel               | Sam Newfield         | tt0033779 |
| 1746502547 | 1910 | 1910 | The Navajo's Bride                                 | The Navajo's Bride                                 | Sherman, George                | George Sherman       | tt1975292 |
| 1769976731 | 1929 | 1929 | Oft in the Silly Night                             | Oft in the Silly Night                             |                                | Sidney Olcott        | tt0254614 |
| 1746567106 | 1932 | 1932 | The Impatient Maiden                               | The Impatient Maiden                               | Gillstrom, Arvid E.            | Arvid E. Gillstrom   | tt0023055 |
| 1746514962 | 1915 | 1915 | A Girl of Yesterday                                | A Girl of Yesterday                                | Whale, James                   | James Whale          | tt0005392 |
| 1746509450 | 1950 | 1950 | Copper Canyon                                      | Copper Canyon                                      | Dwan, Allan                    | Allan Dwan           | tt0042344 |
| 1746574423 | 1951 | 1951 | Bird of Paradise                                   | Bird of Paradise                                   | Farrow, John                   | John Farrow          | tt0043343 |
| 1746409431 | 1988 | 1988 | Punchline                                          | Punchline                                          | Daves, Delmer                  | Delmer Daves         | tt0095927 |
| 1745374460 | 2002 | 2002 | Punch-Drunk Love                                   | Punch-Drunk Love                                   | Seltzer, David                 | David Seltzer        | tt0272338 |
| 1746233167 | 1966 | 1966 | Lt. Robin Crusoe, U.S.N.                           | Lt. Robin Crusoe, U.S.N.                           | Anderson, Paul Thomas          | Paul Thomas Anderson | tt0060640 |
| 1746409442 | 1989 | 1989 | Say Anything...                                    | Say Anything...                                    | Paul, Byron                    | Byron Paul           | tt0098258 |
| 1746580529 | 1939 | 1939 | Good Girls Go to Paris                             | Good Girls Go to Paris                             | Crowe, Cameron                 | Cameron Crowe        | tt0031383 |
| 1746421985 | 1997 | 1997 | G. I. Jane                                         | G. I. Jane                                         | Hall, Alexander                | Alexander Hall       | tt0119173 |
| 1746199842 | 1968 | 1968 | For Love of Ivy                                    | For Love of Ivy                                    | Scott, Ridley                  | Ridley Scott         | tt0062985 |
| 1746409359 | 1984 | 1984 | Hot Dog...The Movie                                | Hot Dog... The Movie                               | Mann, Daniel                   | Daniel Mann          | tt0087425 |
| 1746574958 | 1933 | 1933 | Bye-Gones                                          | Bye Gones                                          | Markle, Peter                  | Peter Markle         | tt0023861 |
| 1745341319 | 2008 | 2008 | Indiana Jones and the Kingdom of the Crystal Skull | Indiana Jones and the Kingdom of the Crystal Skull | Goulding, Alf                  | Alfred J. Goulding   | tt0367882 |
| 1746567747 | 1933 | 1933 | Terror Trail                                       | Terror Trail                                       | Spielberg, Steven              | Steven Spielberg     | tt0024650 |
| 1746524439 | 1916 | 1916 | The Iron Woman                                     | The Iron Woman                                     | Schaefer, Armand               | Armand Schaefer      | tt0006870 |
| 1746420397 | 1993 | 1993 | Menace II Society                                  | Menace II Society                                  | Harbaugh, Carl                 | Carl Harbaugh        | tt0107554 |
| 1746501501 | 1916 | 1916 | The Girl with the Green Eyes                       | The Girl with the Green Eyes                       | Hughes, Allen ; Hughes, Albert | Albert Hughes        | tt0006722 |
| 1746568337 | 1934 | 1934 | Private Scandal                                    | Private Scandal                                    | Blaché, Herbert                | Herbert Blaché       | tt0025682 |
| 1746581627 | 1951 | 1951 | Crosswinds                                         | Crosswinds                                         | Murphy, Ralph                  | Ralph Murphy         | tt0043434 |
| 1746410128 | 1982 | 1982 | Diner                                              | Diner                                              | Foster, Lewis R.               | Lewis R. Foster      | tt0083833 |
| 1746583708 | 1928 | 1928 | Her Summer Hero                                    | Her Summer Hero                                    | Levinson, Barry                | Barry Levinson       | tt0134719 |
| 1746421154 | 1991 | 1991 | Homicide                                           | Homicide                                           | Dugan, James                   | James Dugan          | tt0102048 |
| 1746583668 | 1931 | 1931 | The Mad Genius                                     | The Mad Genius                                     | Mamet, David                   | David Mamet          | tt0022103 |
| 1746564454 | 1951 | 1951 | Double Crossbones                                  | Double Crossbones                                  | Curtiz, Michael                | Michael Curtiz       | tt0042411 |
| 1746512866 | 1916 | 1916 | Rose of the Alley                                  | Rose of the Alley                                  | Barton, Charles T.             | Charles Barton       | tt0004544 |
| 1746439145 | 1944 | 1944 | Henry Aldrich's Little Secret                      | Henry Aldrich's Little Secret                      | Horan, Charles                 | Charles Horan        | tt0036908 |
| 1769970420 | 1967 | 1967 | Free Love Confidential                             | Free Love Confidential                             | Bennett, Hugh                  | Hugh Bennett         | tt0062992 |
| 1746554648 | 1964 | 1964 | Passion Street, U. S. A.                           | Passion Street, U.S.A.                             | Heller, Gordon                 | Gordon Heller        | tt0223888 |
| 1746501067 | 1914 | 1914 | The Chechako                                       | The Chechako                                       | Daley, Oscar                   | Oscar Daley          | tt0003765 |
| 1746409070 | 1984 | 1984 | Breakin'                                           | Breakin'                                           | Bosworth, Hobart               | Hobart Bosworth      | tt0086998 |

|             |      |      |                                                |                                           |                                                |                       |           |
|-------------|------|------|------------------------------------------------|-------------------------------------------|------------------------------------------------|-----------------------|-----------|
| 1746562191  | 1953 | 1953 | Fort Algiers                                   | Fort Algiers                              | Selander, Lesley                               | Lesley Selander       | tt0045783 |
| 1746569494  | 1957 | 1957 | Young and Dangerous                            | Young and Dangerous                       | Claxton, William F.                            | William F. Claxton    | tt0051215 |
| 1746216864  | 1968 | 1968 | A Face of War                                  | A Face of War                             | Jones, Eugene S.                               | Eugene S. Jones       | tt0169885 |
| 1746571321  | 1933 | 1933 | Secrets of Hollywood                           | Secrets of Hollywood                      | Todd, Holbrook                                 | George M. Merrick     | tt0024540 |
| 1746560018  | 1964 | 1964 | 633 Squadron                                   | 633 Squadron                              | Grauman, Walter                                | Walter Grauman        | tt0057811 |
| 1746569653  | 1953 | 1953 | Taxi                                           | Taxi                                      | Ratoff, Gregory                                | Gregory Ratoff        | tt0046405 |
| 1746584426  | 1940 | 1940 | Green Hell                                     | Green Hell                                | Whale, James                                   | James Whale           | tt0032558 |
| 1746504361  | 1920 | 1920 | The Devil's Claim                              | The Devil's Claim                         | Swickard, Charles                              | Charles Swickard      | tt0011112 |
| 1746504195  | 1918 | 1918 | Revenge                                        | Revenge                                   | Browning, Tod                                  | Tod Browning          | tt0009544 |
| 1746584916  | 1939 | 1939 | The Middleton Family at the New York World's F | The Middleton Family at the New York Worl | Snody, Robert R.                               | Robert R. Snody       | tt0031645 |
| 1745293153  | 2005 | 2004 | My Date with Drew                              | My Date with Drew                         | Gunn, Jon ; Herzlinger, Brian ; Winn, Jon Gunn |                       | tt0378407 |
| 1746554379  | 1964 | 1964 | Iron Angel                                     | Iron Angel                                | Kennedy, Ken                                   | Ken Kennedy           | tt0228438 |
| 1746502726  | 1913 | 1913 | The Legend of Provence                         | The Legend of Provence                    |                                                | Eugene Moore          | tt0003058 |
| 1746581806  | 1910 | 1910 | Jean and the Calico Doll                       | Jean and the Calico Doll                  |                                                | Laurence Trimble      | tt0340183 |
| 1746217516  | 1967 | 1967 | Don't Make Waves                               | Don't Make Waves                          | Mackendrick, Alexander                         | Alexander Mackendrick | tt0061590 |
| 1746235490  | 1974 | 1974 | A Very Natural Thing                           | A Very Natural Thing                      | Larkin, Christopher                            | Christopher Larkin    | tt0072362 |
| 1746582939  | 1938 | 1938 | Mars Attacks the World                         | Mars Attacks the World                    | Beebe, Ford; Hill, Robert                      | Ford Beebe            | tt0030423 |
| 1746513157  | 1916 | 1915 | The Test                                       | The Test                                  | Fitzmaurice, George                            | James W. Castle       | tt0343086 |
| 1746509498  | 1927 | 1927 | Love                                           | The Dove                                  | Goulding, Edmund                               | Roland West           | tt0017822 |
| 1746569745  | 1958 | 1958 | Indiscreet                                     | Indiscreet                                | Donen, Stanley                                 | Stanley Donen         | tt0051773 |
| 1746574831  | 1935 | 1935 | A Notorious Gentleman                          | A Notorious Gentleman                     | Laemmle, Edward                                | Edward Laemmle        | tt0026792 |
| 1746578627  | 1962 | 1961 | The Big Wave                                   | The Big Wave                              | Danielewski, Tad                               | Tad Danielewski       | tt0189391 |
| 1746574463  | 1935 | 1935 | His Night Out                                  | His Night Out                             | Nigh, William                                  | William Nigh          | tt0026477 |
| 1746515823  | 1922 | 1922 | Foolish Lives                                  | Foolish Lives                             |                                                | Arvid E. Gillstrom    | tt0332623 |
| 1746585265  | 1928 | 1928 | Hit of the Show                                | Hit of the Show                           | Ince, Ralph                                    | Ralph Ince            | tt0019006 |
| 1746577887  | 1937 | 1937 | Woman Against the World                        | Woman Against the World                   | Selman, David                                  | David Selman          | tt0030984 |
| 1746573912  | 1963 | 1962 | The Raiders of Leyte Gulf                      | The Raiders of Leyte Gulf                 | Romero, Eddie                                  | Eddie Romero          | tt0057445 |
| 17469970576 | 1968 | 1968 | The Night Hustlers                             | The Night Hustlers                        | O'Donald, Bobby                                | Bobby O'Donald        | tt0253321 |
| 1746585182  | 1928 | 1928 | The Apache                                     | The Apache                                | Rosen, Philip                                  | Phil Rosen            | tt0018649 |
| 1746491891  | 1946 | 1946 | The Kid from Brooklyn                          | The Kid from Brooklyn                     | McLeod, Norman Z.                              | Norman Z. McLeod      | tt0038668 |
| 1746507798  | 1926 | 1926 | Her Big Night                                  | Her Big Night                             | Brown, Melville W.                             | Melville W. Brown     | tt0016957 |
| 1746583813  | 1929 | 1929 | The House of Secrets                           | The House of Secrets                      | Lawrence, Edmund                               | Edmund Lawrence       | tt0123108 |
| 1746580269  | 1938 | 1938 | It's All in Your Mind                          | It's All in Your Mind                     | Ray, Bernard B.                                | Bernard B. Ray        | tt0030281 |
| 1746504374  | 1919 | 1919 | The Mayor of Filbert                           | The Mayor of Filbert                      | Cabanne, William Christy                       | Christy Cabanne       | tt0010447 |
| 1746578558  | 1960 | 1960 | Noose for a Gunman                             | Noose for a Gunman                        | Cahn, Edward L.                                | Edward L. Cahn        | tt0054126 |
| 1746502447  | 1916 | 1916 | A Million a Minute                             | A Million a Minute                        | Noble, John W.                                 | John W. Noble         | tt0007065 |
| 1746584332  | 1937 | 1937 | Clarence                                       | Clarence                                  | Archainbaud, George                            | George Archainbaud    | tt0028722 |
| 1746235759  | 1976 | 1976 | Squirm                                         | Squirm                                    | Lieberman, Jeff                                | Jeff Lieberman        | tt0075261 |
| 1746585252  | 1929 | 1929 | The Donovan Affair                             | The Donovan Affair                        | Capra, Frank R.                                | Frank Capra           | tt0019831 |
| 1746186192  | 1965 | 1965 | Eve and the Merman                             | Eve and the Merman                        | Royton, Chev                                   | Roy P. Cheverton      | tt0136814 |
| 1746453776  | 1943 | 1943 | Smart Guy                                      | Smart Guy                                 | Hillyer, Lambert                               | Lambert Hillyer       | tt0036366 |
| 1746453465  | 1941 | 1942 | Thundering Hoofs                               | Thundering Hoofs                          | Selander, Lesley                               | Lesley Selander       | tt0034290 |
| 1746394670  | 1990 | 1990 | Taking Care of Business                        | Taking Care of Business                   | Hiller, Arthur                                 | Arthur Hiller         | tt0103035 |
| 1746577586  | 1937 | 1937 | Make a Wish                                    | Make a Wish                               | Neumann, Kurt                                  | Kurt Neumann          | tt0029193 |
| 1746581701  | 1910 | 1910 | The Greater Love                               | The Greater Love                          |                                                | Edwin S. Porter       | tt1064757 |
| 1746209157  | 1968 | 1968 | Salt & Pepper                                  | Salt and Pepper                           | Donner, Richard D.                             | Richard Donner        | tt0063534 |
| 1746494362  | 1911 | 1911 | When Love Was Blind                            | When Love Was Blind                       | Henderson, Lucius J.                           | Lucius Henderson      | tt0409478 |
| 1746581037  | 1951 | 1951 | Purple Heart Diary                             | Purple Heart Diary                        | Quine, Richard                                 | Richard Quine         | tt0043942 |
| 1746496384  | 1918 | 1918 | Riders of the Night                            | Riders of the Night                       | Collins, John H.                               | John H. Collins       | tt0009551 |
| 1746420512  | 1993 | 1993 | Dazed and Confused                             | Dazed and Confused                        | Linklater, Richard                             | Richard Linklater     | tt0106677 |
| 1746555232  | 1954 | 1954 | It Should Happen to You                        | It Should Happen to You                   | Cukor, George                                  | George Cukor          | tt0047123 |
| 1746456098  | 1994 | 1994 | Serial Mom                                     | Serial Mom                                | Waters, John                                   | John Waters           | tt0111127 |
| 1746464822  | 1942 | 1942 | A Desperate Chance for Ellery Queen            | A Desperate Chance for Ellery Queen       | Hogan, James                                   | James P. Hogan        | tt0034645 |
| 1746581964  | 1928 | 1928 | Tempest                                        | Tempest                                   | Taylor, Sam                                    | Sam Taylor            | tt0019451 |
| 1746569631  | 1955 | 1955 | The Tender Trap                                | The Tender Trap                           | Walters, Charles                               | Charles Walters       | tt0048705 |
| 1746435925  | 1996 | 1996 | It's My Party                                  | It's My Party                             | Kleiser, Randal                                | Randal Kleiser        | tt0113443 |
| 1746454177  | 1997 | 1996 | Suburbia                                       | SubUrbia                                  | Linklater, Richard                             | Richard Linklater     | tt0120238 |

|            |      |      |                                          |                                          |                                                    |                       |           |
|------------|------|------|------------------------------------------|------------------------------------------|----------------------------------------------------|-----------------------|-----------|
| 1746219591 | 1972 | 1972 | Play It Again, Sam                       | Play It Again, Sam                       | Ross, Herbert                                      | Herbert Ross          | tt0069097 |
| 1746475935 | 1947 | 1947 | Lost Honeymoon                           | Lost Honeymoon                           | Jason, Leigh                                       | Leigh Jason           | tt0039582 |
| 1746533029 | 1923 | 1923 | The Abysmal Brute                        | Abysmal Brute                            | Henley, Hobart                                     | Hobart Henley         | tt0013814 |
| 1746500098 | 1946 | 1946 | Prairie Badmen                           | Prairie Badmen                           | Newfield, Sam                                      | Sam Newfield          | tt0038856 |
| 1746482898 | 1917 | 1917 | Betty Be Good                            | Betty Be Good                            | MacDonald, Sherwood                                | Sherwood MacDonald    | tt0167041 |
| 1745341020 | 2008 | 2007 | Kabluey                                  | Kabluey                                  | Prendergast, Scott                                 | Scott Prendergast     | tt0816545 |
| 1746512658 | 1927 | 1927 | Desert Dust                              | Desert Dust                              | Wylar, William                                     | William Wylar         | tt0017802 |
| 1746465213 | 1944 | 1944 | Rationing                                | Rationing                                | Goldbeck, Willis                                   | Willis Goldbeck       | tt0037211 |
| 1746583162 | 1939 | 1939 | First Love                               | First Love                               | Koster, Henry                                      | Henry Koster          | tt0031311 |
| 1746524765 | 1916 | 1916 | The Bruiser                              | The Bruiser                              | Bartlett, Charles                                  | Charles Bartlett      | tt0006473 |
| 1746248259 | 1968 | 1968 | Three Guns for Texas                     | Three Guns for Texas                     | Rich, David Lowell; Stanley, Paul; Be Earl Bellamy | Earl Bellamy          | tt0063691 |
| 1746515696 | 1918 | 1918 | Closin' in                               | Closin' In                               | McLaughlin, J. W.                                  | James McLaughlin      | tt0184345 |
| 1746570352 | 1934 | 1934 | David Harum                              | David Harum                              | Cruze, James                                       | James Cruze           | tt0025035 |
| 1746574977 | 1936 | 1935 | Just My Luck                             | Just My Luck                             | Heinz, Russell Ray                                 | Ray Heinz             | tt0027832 |
| 1746495917 | 1918 | 1918 | Together                                 | Together                                 | Lund, O. A. C.                                     | O.A.C. Lund           | tt0009708 |
| 1746525162 | 1920 | 1920 | Dad's Girl                               | Dad's Girl                               | Fischer, David G.                                  | David G. Fischer      | tt0190343 |
| 1746572132 | 1932 | 1932 | Men Are Such Fools                       | Men Are Such Fools                       | Nigh, William                                      | William Nigh          | tt0023206 |
| 1746515776 | 1922 | 1922 | The Woman He Loved                       | The Woman He Loved                       | Sloman, Edward                                     | Edward Sloman         | tt0013779 |
| 1746575927 | 1932 | 1932 | One Way Passage                          | One Way Passage                          | Garnett, Tay                                       | Tay Garnett           | tt0023305 |
| 1769970827 | 1915 | 1915 | Syd and His Sweethearts                  | Syd and His Sweethearts                  | De Grey, Sidney                                    | Sidney De Gray        | tt1456629 |
| 1746561982 | 1955 | 1955 | Wine of Morning                          | Wine of Morning                          | Stenholm, Katherine                                | Katherine Stenholm    | tt0497057 |
| 1746513819 | 1916 | 1916 | Other People's Money                     | Other People's Money                     | Parke, William                                     | William Parke         | tt0163132 |
| 1746584344 | 1939 | 1939 | Chip of the Flying U                     | Chip of the Flying U                     | Staub, Ralph                                       | Ralph Staub           | tt0032336 |
| 1746565292 | 1932 | 1932 | Dangers of the Arctic                    | Dangers of the Arctic                    | Rossmann, Earl                                     | Earl Rossmann         | tt1270623 |
| 1746465032 | 1946 | 1946 | 'Neath Canadian Skies                    | 'Neath Canadian Skies                    | Eason, B. Reeves                                   | B. Reeves Eason       | tt0038277 |
| 1746577170 | 1951 | 1951 | A Millionaire for Christy                | A Millionaire for Christy                | Marshall, George                                   | George Marshall       | tt0043807 |
| 1746524342 | 1916 | 1915 | Cross Currents                           | Cross Currents                           | Grandon, Francis                                   | Francis J. Grandon    | tt0005160 |
| 1746582691 | 1936 | 1936 | Half Angel                               | Half Angel                               | Lanfield, Sidney                                   | Sidney Lanfield       | tt0027713 |
| 1769973935 | 1925 | 1926 | Raisin-Trouble!!                         | Raisin' Trouble                          | Pembroke, "Perc"                                   | Scott Pembroke        | tt1074590 |
| 1745272314 | 2000 | 2000 | Nutty Professor II: The Klumps           | Nutty Professor II: The Klumps           | Segal, Peter                                       | Peter Segal           | tt0144528 |
| 1745342898 | 2004 | 2004 | Starsky & Hutch                          | Starsky & Hutch                          | Phillips, Todd                                     | Todd Phillips         | tt0335438 |
| 1746512743 | 1913 | 1913 | A Princess of Bagdad                     | A Princess of Bagdad                     | Gaskill, Charles L.                                | Charles L. Gaskill    | tt0003298 |
| 1746248604 | 1967 | 1967 | Mondo Mod                                | Mondo Mod                                | Perry, Peter                                       | Peter Perry Jr.       | tt0174030 |
| 1746585165 | 1930 | 1930 | Under Texas Skies                        | Under Texas Skies                        | McGowan, J. P.                                     | J.P. McGowan          | tt0021502 |
| 1746393270 | 1987 | 1987 | Fatal Attraction                         | Fatal Attraction                         | Lyne, Adrian                                       | Adrian Lyne           | tt0093010 |
| 1746555218 | 1957 | 1957 | The Dalton Girls                         | The Dalton Girls                         | LeBorg, Reginald                                   | Reginald Le Borg      | tt0050285 |
| 1746584305 | 1939 | 1939 | Westbound Stage                          | Westbound Stage                          | Bennett, Spencer Gordon                            | Spencer Gordon Bennet | tt0033252 |
| 1746437851 | 1940 | 1940 | I Can't Give You Anything but Love, Baby | I Can't Give You Anything But Love, Baby | Rogell, Albert S.                                  | Albert S. Rogell      | tt0032616 |
| 1746235703 | 1978 | 1978 | Bloodbrothers                            | Bloodbrothers                            | Mulligan, Robert                                   | Robert Mulligan       | tt0078878 |
| 1746584423 | 1940 | 1940 | The Letter                               | The Letter                               | Wylar, William                                     | William Wylar         | tt0032701 |
| 1746410753 | 1994 | 1994 | Getting Even with Dad                    | Getting Even with Dad                    | Deutch, Howard                                     | Howard Deutch         | tt0109891 |
| 1746582719 | 1936 | 1936 | The Bridge of Sighs                      | The Bridge of Sighs                      | Rosen, Phil                                        | Phil Rosen            | tt0027398 |
| 1745302305 | 2006 | 2006 | Maple Palm                               | Maple Palm                               | Torjan, Ralph                                      | Ralph Torjan          | tt0481572 |
| 1746581652 | 1951 | 1951 | Cuban Fireball                           | Cuban Fireball                           | Beaudine, William                                  | William Beaudine      | tt0043437 |
| 1746493391 | 1910 | 1910 | The Stolen Fortune                       | The Stolen Fortune                       | Ricketts, Thomas                                   | Tom Ricketts          | tt1661444 |
| 1746410856 | 1993 | 1993 | Hexed                                    | Hexed                                    | Spencer, Alan                                      | Alan Spencer          | tt0107107 |
| 1746491778 | 1944 | 1944 | Tucson Raiders                           | Tucson Raiders                           | Bennet, Spencer                                    | Spencer Gordon Bennet | tt0037402 |
| 1746504021 | 1921 | 1921 | White and Unmarried                      | White and Unmarried                      | Forman, Tom                                        | Tom Forman            | tt0012844 |
| 1746409494 | 1985 | 1985 | Out of Africa                            | Out of Africa                            | Pollack, Sydney                                    | Sydney Pollack        | tt0089755 |
| 1746520659 | 1927 | 1927 | Not for Publication                      | Not for Publication                      | Ince, Ralph                                        | Ralph Ince            | tt0142704 |
| 1746584560 | 1931 | 1931 | Hell's Valley                            | Hell's Alley                             | Neitz, Alvin J.                                    | Thomas Moseley        | tt0366563 |
| 1746566276 | 1955 | 1955 | Kentucky Rifle                           | Kentucky Rifle                           | Hittleman, Carl K.                                 | Carl K. Hittleman     | tt0049403 |
| 1746570570 | 1933 | 1933 | Shadows of Sing Sing                     | Shadows of Sing Sing                     | Rosen, Phil                                        | Phil Rosen            | tt0025769 |
| 1746491750 | 1946 | 1946 | The Cockeyed Miracle                     | The Cockeyed Miracle                     | Simon, S. Sylvan                                   | S. Sylvan Simon       | tt0038420 |
| 1746561315 | 1954 | 1954 | Witness to Murder                        | Witness to Murder                        | Rowland, Roy                                       | Roy Rowland           | tt0047679 |
| 1746564757 | 1953 | 1953 | By the Light of the Silvery Moon         | By the Light of the Silvery Moon         | Butler, David                                      | David Butler          | tt0045586 |
| 1745372853 | 2003 | 2003 | Anything Else                            | Anything Else                            | Allen, Woody                                       | Woody Allen           | tt0313792 |

|            |      |      |                                    |                                    |                                      |                       |           |
|------------|------|------|------------------------------------|------------------------------------|--------------------------------------|-----------------------|-----------|
| 1746464837 | 1945 | 1944 | Meet Me in St. Louis               | Meet Me in St. Louis               | Minnelli, Vincente                   | Vincente Minnelli     | tt0037059 |
| 1746568136 | 1934 | 1934 | Hat, Coat, and Glove               | Hat, Coat, and Glove               | Miner, Worthington                   | Worthington Miner     | tt0025222 |
| 1746524585 | 1928 | 1928 | Man from Headquarters              | The Man from Headquarters          | Worne, Duke                          | Duke Worne            | tt0019132 |
| 1746464802 | 1942 | 1942 | Beyond the Blue Horizon            | Beyond the Blue Horizon            | Santell, Alfred                      | Alfred Santell        | tt0034510 |
| 1746504122 | 1920 | 1920 | The Girl in Number 29              | The Girl in Number 29              | Ford, Jack                           | John Ford             | tt0011228 |
| 1746582923 | 1939 | 1939 | Six-Gun Rhythm                     | Six Gun Rhythm                     | Newfield, Sam                        | Sam Newfield          | tt0031929 |
| 1746423500 | 1991 | 1991 | All I Want for Christmas           | All I Want for Christmas           | Lieberman, Robert                    | Robert Lieberman      | tt0101301 |
| 1746577449 | 1951 | 1951 | Lullaby of Broadway                | Lullaby of Broadway                | Butler, David                        | David Butler          | tt0043762 |
| 1746559892 | 1965 | 1965 | Requiem for a Gunfighter           | Requiem for a Gunfighter           | Bennet, Spencer Gordon               | Spencer Gordon Bennet | tt0059647 |
| 1746410450 | 1987 | 1987 | Nuts                               | Nuts                               | Ritt, Martin                         | Martin Ritt           | tt0093660 |
| 1745393799 | 2008 | 2008 | The Bank Job                       | The Bank Job                       | Donaldson, Roger                     | Roger Donaldson       | tt0200465 |
| 1746453783 | 1940 | 1940 | Trailing Double Trouble            | Trailing Double Trouble            | Luby, S. Roy                         | S. Roy Luby           | tt0033181 |
| 1746210157 | 1971 | 1971 | Catlow                             | Catlow                             | Wanamaker, Sam                       | Sam Wanamaker         | tt0066900 |
| 1746514559 | 1916 | 1916 | A Corner in Colleens               | A Corner in Colleens               | Miller, Charles                      | Charles Miller        | tt0157484 |
| 1746514871 | 1923 | 1923 | Tipped Off                         | Tipped Off                         | Fox, Finis                           | Finis Fox             | tt0014551 |
| 1746562328 | 1956 | 1956 | Gaby                               | Gaby                               | Bernhardt, Curtis                    | Curtis Bernhardt      | tt0049247 |
| 1746524690 | 1927 | 1927 | The Beloved Rogue                  | The Beloved Rogue                  | Crosland, Alan                       | Alan Crosland         | tt0017667 |
| 1746555392 | 1954 | 1954 | The Scarlet Spear                  | The Scarlet Spear                  | Breakston, George; Stahl, Ray        | George P. Breakston   | tt0047452 |
| 1746465339 | 1944 | 1944 | Frontier Outlaws                   | Frontier Outlaws                   | Newfield, Sam                        | Sam Newfield          | tt0036842 |
| 1746465028 | 1947 | 1947 | Jiggs and Maggie in Society        | Jiggs and Maggie in Society        | Cline, Eddie                         | Edward F. Cline       | tt0039513 |
| 1746454834 | 1942 | 1942 | Private Buckaroo                   | Private Buckaroo                   | Cline, Edward F.                     | Edward F. Cline       | tt0035218 |
| 1746574435 | 1958 | 1958 | The World Was His Jury             | The World Was His Jury             | Sears, Fred F.                       | Fred F. Sears         | tt0052407 |
| 1746515725 | 1922 | 1922 | Spitfire                           | Spitfire                           |                                      |                       | tt0089683 |
| 1746488023 | 1918 | 1918 | A Bachelor's Children              | A Bachelor's Children              | Scardon, Paul                        | Paul Scardon          | tt0008858 |
| 1746497034 | 1920 | 1920 | That Something                     | That Something                     | Wilson, Margery; Underwood, Lawrence | Margery Wilson        | tt0011759 |
| 1745341608 | 2002 | 2002 | Ballistic: Ecks vs. Sever          | Ballistic: Ecks vs. Sever          | Kaos                                 | Wych Kaosayananda     | tt0308208 |
| 1746502003 | 1914 | 1914 | The Tangle                         | The Tangle                         | Lambart, Harry                       | Harry Lambart         | tt0004668 |
| 1746497889 | 1919 | 1919 | The Unknown Love                   | Unknown Love                       | Perret, Léonce                       | Léonce Perret         | tt0010822 |
| 1746516272 | 1920 | 1920 | Love Without Question              | Love Without Question              | Rolfe, B. A.                         | B.A. Rolfe            | tt0011417 |
| 1746509017 | 1949 | 1949 | The Green Promise                  | The Green Promise                  | Russell, William D.                  | William D. Russell    | tt0041431 |
| 1746582695 | 1935 | 1935 | Four Hours to Kill!                | Four Hours to Kill!                | Leisen, Mitchell                     | Mitchell Leisen       | tt0026378 |
| 1746410886 | 1989 | 1989 | Relentless                         | Relentless                         | Lustig, William                      | William Lustig        | tt0098184 |
| 1746409250 | 1987 | 1987 | 3 Men and a Baby                   | 3 Men and a Baby                   | Nimoy, Leonard                       | Leonard Nimoy         | tt0094137 |
| 1746569737 | 1953 | 1953 | Mesa of Lost Women                 | Mesa of Lost Women                 | Tevos, Herbert; Ormond, Ron          | Ron Ormond            | tt0046066 |
| 1746233960 | 1966 | 1965 | Taylor Mead's Ass                  | Taylor Mead's Ass                  | Warhol, Andy                         | Andy Warhol           | tt0244835 |
| 1746578054 | 1938 | 1938 | Romance of the Limberlost          | Romance of the Limberlost          | Nigh, William                        | William Nigh          | tt0030692 |
| 1746435484 | 1943 | 1943 | Mr. Muggs Steps Out                | Mr. Muggs Steps Out                | Beaudine, William                    | William Beaudine      | tt0036175 |
| 1746574904 | 1935 | 1935 | Hard Rock Harrigan                 | Hard Rock Harrigan                 | Howard, David                        | David Howard          | tt0026454 |
| 1746497572 | 1919 | 1919 | The House of Intrigue              | The House of Intrigue              | Ingraham, Lloyd                      | Lloyd Ingraham        | tt0010272 |
| 1746438292 | 1945 | 1945 | Boston Blackie Booked on Suspicion | Boston Blackie Booked on Suspicion | Dreifuss, Arthur                     | Arthur Dreifuss       | tt0037553 |
| 1746570285 | 1934 | 1934 | The Road to Ruin                   | The Road to Ruin                   | Reid, Wallace; Shyer, Melville       | Dorothy Davenport     | tt0025725 |
| 1746574056 | 1961 | 1961 | Everything's Ducky                 | Everything's Ducky                 | Taylor, Don                          | Don Taylor            | tt0054860 |
| 1746486156 | 1919 | 1919 | Counterfeit                        | Counterfeit                        | Fitzmaurice, George                  | George Fitzmaurice    | tt0144845 |
| 1746250600 | 1980 | 1980 | American Gigolo                    | American Gigolo                    | Schrader, Paul                       | Paul Schrader         | tt0080365 |
| 1746198210 | 1969 | 1969 | Pit Stop                           | Pit Stop                           | Hill, Jack                           | Jack Hill             | tt0064819 |
| 1746410527 | 1992 | 1992 | Diggstown                          | Diggstown                          | Ritchie, Michael                     | Michael Ritchie       | tt0104107 |
| 1746420154 | 1981 | 1981 | Hell Night                         | Hell Night                         | DeSimone, Tom                        | Tom DeSimone          | tt0082511 |
| 1746423714 | 1940 | 1940 | Rangers of Fortune                 | Rangers of Fortune                 | Wood, Sam                            | Sam Wood              | tt0032973 |
| 1746438469 | 1941 | 1941 | Double Date                        | Double Date                        | Tryon, Glenn                         | Glenn Tryon           | tt0033548 |
| 1746232996 | 1968 | 1968 | The Bamboo Saucer                  | The Bamboo Saucer                  | Telford, Frank                       | Frank Telford         | tt0062704 |
| 1746581272 | 1961 | 1961 | The Ruined Bruin                   | The Ruined Bruin                   | McCarthy, John K.                    | John K. McCarthy      | tt0045684 |
| 1746420898 | 1995 | 1995 | Angus                              | Angus                              | Johnson, Patrick Read                | Patrick Read Johnson  | tt0112368 |
| 1746571768 | 1910 | 1910 | The Course of True Love            | The Course of True Love            | Powell, Frank                        | D.W. Griffith         | tt0001165 |
| 1746583562 | 1951 | 1951 | Navy Bound                         | Navy Bound                         | Landres, Paul                        | Paul Landres          | tt0043843 |
| 1745272077 | 2000 | 2000 | Whipped                            | Whipped                            | Cohen, Peter M.                      | Peter M. Cohen        | tt0174336 |
| 1746525128 | 1921 | 1921 | The Ten Dollar Raise               | The Ten Dollar Raise               | Sloman, Edward                       | Edward Sloman         | tt0012744 |
| 1746438608 | 1944 | 1944 | Jam Session                        | Jam Session                        | Barton, Charles                      | Charles Barton        | tt0036966 |

|            |      |      |                                       |                                       |                                   |                    |           |
|------------|------|------|---------------------------------------|---------------------------------------|-----------------------------------|--------------------|-----------|
| 1746513659 | 1916 | 1916 | The Dark Silence                      | The Dark Silence                      | Capellani, Albert                 | Albert Capellani   | tt0157508 |
| 1746584434 | 1930 | 1930 | Manslaughter                          | Manslaughter                          | Abbott, George                    | George Abbott      | tt0021121 |
| 1746485839 | 1920 | 1920 | The Wonderful Chance                  | The Wonderful Chance                  | Archainbaud, George               | George Archainbaud | tt0011881 |
| 1746542643 | 1924 | 1924 | Huntin' Trouble                       | Huntin' Trouble                       | Maloney, Leo D.; Williamson, Bob  | Leo D. Maloney     | tt0135464 |
| 1746577795 | 1933 | 1933 | She Had to Say Yes                    | She Had to Say Yes                    | Berkeley, Busby; Amy, George      | George Amy         | tt0024549 |
| 1746567612 | 1933 | 1933 | The Women in His Life                 | The Women in His Life                 | Seitz, George B.                  | George B. Seitz    | tt0026006 |
| 1746209739 | 1971 | 1971 | The Barefoot Executive                | The Barefoot Executive                | Butler, Robert                    | Robert Butler      | tt0066811 |
| 1745359857 | 2001 | 2001 | Dogtown and Z-Boys                    | Dogtown and Z-Boys                    | Peralta, Stacy                    | Stacy Peralta      | tt0275309 |
| 1769969440 | 1964 | 1964 | Dr. Sex                               | Dr. Sex                               |                                   | Ted V. Mikels      | tt0058037 |
| 1746433772 | 1998 | 1998 | I Still Know What You Did Last Summer | I Still Know What You Did Last Summer | Cannon, Danny                     | Danny Cannon       | tt0130018 |
| 1746498318 | 1919 | 1919 | Hearts Asleep                         | Hearts Asleep                         | Hickman, Howard                   | Howard C. Hickman  | tt0203559 |
| 1746503615 | 1920 | 1920 | Beautifully Trimmed                   | Beautifully Trimmed                   | De Sano, Marcel                   | Marcel De Sano     | tt0010984 |
| 1746524046 | 1916 | 1916 | The World and the Woman               | The World and the Woman               | Moore, Eugene                     | Frank Lloyd        | tt0007590 |
| 1746184678 | 1965 | 1965 | Psycho A Go-Go!                       | Psycho a Go Go                        | Adamson, Al                       | Al Adamson         | tt0134915 |
| 1746410217 | 1990 | 1990 | The Invisible Maniac                  | The Invisible Maniac                  | Coogan, Rif                       | Adam Rifkin        | tt0099856 |
| 1746580252 | 1936 | 1936 | I Conquer the Sea!                    | I Conquer the Sea!                    | Halperin, Victor                  | Victor Halperin    | tt0027774 |
| 1746454626 | 1944 | 1944 | Since You Went Away                   | Since You Went Away                   | Cromwell, John                    | John Cromwell      | tt0037280 |
| 1746580938 | 1910 | 1910 | Jane Eyre                             | Jane Eyre                             |                                   | Theodore Marston   | tt0290677 |
| 1746435913 | 1992 | 1991 | There's Nothing Out There             | There's Nothing Out There             | Kanefsky, Rolfe                   | Rolfe Kanefsky     | tt0103077 |
| 1746577725 | 1933 | 1933 | Going Hollywood                       | Going Hollywood                       | Walsh, Raoul                      | Raoul Walsh        | tt0024067 |
| 1746532468 | 1914 | 1914 | His Last Dollar                       | His Last Dollar                       |                                   | Frank Powell       | tt0004097 |
| 1746583993 | 1936 | 1936 | A Man Betrayed                        | A Man Betrayed                        | Auer, John H.                     | John H. Auer       | tt0029199 |
| 1746577739 | 1935 | 1935 | I Dream Too Much                      | I Dream Too Much                      | Cromwell, John                    | John Cromwell      | tt0026507 |
| 1746503567 | 1920 | 1920 | Oh, Lady, Lady                        | Oh, Lady, Lady                        | Campbell, Maurice                 | Maurice Campbell   | tt0011527 |
| 1746569709 | 1957 | 1957 | The Midnight Story                    | The Midnight Story                    | Pevney, Joseph                    | Joseph Pevney      | tt0050704 |
| 1746500738 | 1927 | 1927 | Loco Luck                             | Loco Luck                             | Smith, Cliff                      | Clifford Smith     | tt0018096 |
| 1746453826 | 1944 | 1944 | Thundering Gun Slingers               | Thundering Gun Slingers               | Newfield, Sam                     | Sam Newfield       | tt0037375 |
| 1746583966 | 1939 | 1939 | Ambush                                | Ambush                                | Neumann, Kurt                     | Kurt Neumann       | tt0031039 |
| 1745309637 | 2007 | 2007 | The Reaping                           | The Reaping                           | Hopkins, Stephen                  | Stephen Hopkins    | tt0444682 |
| 1746570579 | 1934 | 1933 | Dinner at Eight                       | Dinner at Eight                       | Cukor, George                     | George Cukor       | tt0023948 |
| 1746555526 | 1955 | 1955 | The Vanishing American                | The Vanishing American                | Kane, Joe                         | Joseph Kane        | tt0048773 |
| 1746500960 | 1913 | 1913 | Victory                               | Victory                               | Read, J. Parker                   | J. Parker Read Jr. | tt0003508 |
| 1746198473 | 1966 | 1967 | Road to Nashville                     | The Road to Nashville                 | Zens, Will                        | Will Zens          | tt0268582 |
| 1746520708 | 1925 | 1925 | Never Too Late                        | Never Too Late                        | Sheldon, Forrest                  | Forrest Sheldon    | tt0016149 |
| 1746503570 | 1918 | 1918 | By Right of Purchase                  | By Right of Purchase                  | Miller, Charles                   | Charles Miller     | tt0184314 |
| 1746516478 | 1920 | 1920 | The River's End                       | The River's End                       | Neilan, Marshall; Heerman, Victor | Victor Heerman     | tt0011632 |
| 1746438471 | 1942 | 1942 | Call of the Canyon                    | Call of the Canyon                    | Santley, Joseph                   | Joseph Santley     | tt0034568 |
| 1746508070 | 1948 | 1948 | Tornado Range                         | Tornado Range                         | Taylor, Ray                       | Ray Taylor         | tt0040889 |
| 1746503692 | 1921 | 1921 | The Speed Girl                        | The Speed Girl                        | Campbell, Maurice                 | Maurice Campbell   | tt0012718 |
| 1746454363 | 1941 | 1941 | Tuxedo Junction                       | Tuxedo Junction                       | McDonald, Frank                   | Frank McDonald     | tt0034319 |
| 1746273672 | 1980 | 1980 | Humanoids from the Deep               | Humanoids from the Deep               | Peeters, Barbara                  | Barbara Peeters    | tt0080904 |
| 1746423685 | 1940 | 1940 | Dr. Ehrlich's Magic Bullet            | Dr. Ehrlich's Magic Bullet            | Dieterle, William                 | William Dieterle   | tt0032413 |
| 1746554339 | 1965 | 1965 | Space                                 | Space                                 | Warhol, Andy                      | Andy Warhol        | tt0196966 |
| 1746514632 | 1916 | 1916 | Why Love Is Blind                     | Why Love Is Blind                     | Nichols, George                   | George Nichols     | tt0436969 |
| 1746424381 | 1941 | 1941 | The Lone Rider Ambushed               | The Lone Rider Ambushed               | Newfield, Sam                     | Sam Newfield       | tt0033841 |
| 1746530782 | 1950 | 1950 | Father Makes Good                     | Father Makes Good                     | Yarbrough, Jean                   | Jean Yarbrough     | tt0042450 |
| 1746570159 | 1952 | 1952 | Breakdown                             | Breakdown                             | Angelo, Edmond                    | Edmond Angelo      | tt0044445 |
| 1746562310 | 1955 | 1955 | Revenge of the Creature               | Revenge of the Creature               | Arnold, Jack                      | Jack Arnold        | tt0048554 |
| 1746509232 | 1925 | 1925 | Easy Money                            | Easy Money                            | Rogell, Albert                    | Albert S. Rogell   | tt0015777 |
| 1745282663 | 2006 | 2006 | Mini's First Time                     | Mini's First Time                     | Guthe, Nick                       | Nick Guthe         | tt0425253 |
| 1746583111 | 1934 | 1934 | White Heat                            | White Heat                            | Weber, Lois                       | Lois Weber         | tt0025985 |
| 1746508440 | 1926 | 1926 | The Hidden Way                        | The Hidden Way                        | De Grasse, Joseph                 | Joseph De Grasse   | tt0016964 |
| 1746584757 | 1928 | 1928 | Free Lips                             | Free Lips                             | MacDonald, Wallace                | Wallace MacDonald  | tt0018916 |
| 1746584678 | 1930 | 1930 | Lotus Lady                            | Lotus Lady                            | Rosen, Phil                       | Phil Rosen         | tt0021095 |
| 1746566234 | 1955 | 1955 | The Shrike                            | The Shrike                            | Ferrer, José                      | José Ferrer        | tt0048614 |
| 1746500125 | 1924 | 1924 | Driftwood                             | Driftwood                             |                                   | Roland West        | tt0356556 |
| 1746524856 | 1928 | 1928 | The Olympic Hero                      | The Olympic Hero                      | Neill, R. William                 | Roy William Neill  | tt0019232 |



|                   |             |             |                                  |                                  |                         |                        |                  |
|-------------------|-------------|-------------|----------------------------------|----------------------------------|-------------------------|------------------------|------------------|
| 1746419799        | 1993        | 1993        | Six Degrees of Separation        | Six Degrees of Separation        | Schepisi, Fred          | Fred Schepisi          | tt0108149        |
| 1746508742        | 1926        | 1926        | Meet the Prince                  | Meet the Prince                  | Henabery, Joseph        | Joseph Henabery        | tt0017131        |
| 1746580523        | 1938        | 1938        | Kentucky                         | Kentucky                         | Butler, David           | David Butler           | tt0030317        |
| 1746583193        | 1931        | 1932        | One Man Law                      | One Man Law                      | Hillyer, Lambert        | Lambert Hillyer        | tt0023304        |
| 1746504009        | 1922        | 1922        | No Trespassing                   | No Trespassing                   | Hollywood, Edwin L.     | Edwin L. Hollywood     | tt0013439        |
| 1746424232        | 1940        | 1940        | The Light of Western Stars       | The Light of Western Stars       | Selander, Lesley        | Lesley Selander        | tt0032706        |
| 1746197975        | 1969        | 1969        | Daddy's Gone A-Hunting           | Daddy's Gone A Hunting           | Robson, Mark            | Mark Robson            | tt0064209        |
| 1746503749        | 1917        | 1917        | The Valentine Girl               | The Valentine Girl               | Dawley, J. Searle       | J. Searle Dawley       | tt0008726        |
| 1745340530        | 2002        | 2001        | American Adobo                   | American Adobo                   | Guillen, Laurice        | Laurice Guillen        | tt0294289        |
| 1769970072        | 1912        | 1912        | The Non-Commissioned Officer     | The Non Commissioned Officer     | Edwin, Walter           | Charles Brabin         | tt0002393        |
| 1746584940        | 1940        | 1940        | Convicted Woman                  | Convicted Woman                  | Grinde, Nick            | Nick Grinde            | tt0032358        |
| 1746514108        | 1914        | 1914        | The Voice at the Telephone       | The Voice at the Telephone       | Giblyn, Charles         | Charles Giblyn         | tt0004769        |
| 1746582438        | 1936        | 1936        | A Woman Rebels                   | A Woman Rebels                   | Sandrich, Mark          | Mark Sandrich          | tt0028517        |
| 1746566331        | 1958        | 1958        | The Bravados                     | The Bravados                     | King, Henry             | Henry King             | tt0051433        |
| 1746533204        | 1923        | 1923        | Cyclone Jones                    | Cyclone Jones                    | Seeling, Charles R.     | Charles R. Seeling     | tt0013964        |
| 1746408664        | 1990        | 1990        | Die Hard 2                       | Die Hard 2                       | Harlin, Renny           | Renny Harlin           | tt0099423        |
| 1746563812        | 1953        | 1953        | Affair with a Stranger           | Affair with a Stranger           | Rowland, Roy            | Roy Rowland            | tt0045477        |
| 1746500549        | 1926        | 1926        | The Outlaw Express               | The Outlaw Express               | Maloney, Leo D.         | Leo D. Maloney         | tt0017239        |
| 1746577873        | 1938        | 1938        | Penitentiary                     | Penitentiary                     | Brahm, John             | John Brahm             | tt0030567        |
| 1746218776        | 1973        | 1973        | Bad Charleston Charlie           | Bad Charleston Charlie           | Nagy, Ivan              | Ivan Nagy              | tt0069758        |
| 1746219193        | 1980        | 1980        | Smokey and the Bandit II         | Smokey and the Bandit II         | Needham, Hal            | Hal Needham            | tt0081529        |
| 1746516459        | 1920        | 1920        | Red Foam                         | Red Foam                         | Ince, Ralph             | Ralph Ince             | tt0011615        |
| 1746578624        | 1961        | 1961        | By Love Possessed                | By Love Possessed                | Sturges, John           | John Sturges           | tt0054710        |
| 1769969385        | 1930        | 1930        | Crazy House                      | Crazy House                      | Cummings, Jack          | Jack Cummings          | tt0020796        |
| 1746582955        | 1937        | 1937        | King of Gamblers                 | King of Gamblers                 | Florey, Robert          | Robert Florey          | tt0029083        |
| <b>1746584421</b> | <b>1940</b> | <b>1940</b> | <b>Lillian Russell</b>           | <b>Lillian Russell</b>           | <b>Cummings, Irving</b> | <b>Irving Cummings</b> | <b>tt0032710</b> |
| 1746577630        | 1933        | 1933        | Design for Living                | Design for Living                | Lubitsch, Ernst         | Ernst Lubitsch         | tt0023940        |
| 1746503355        | 1918        | 1918        | Dolly Does Her Bit               | Dolly Does Her Bit               | Bertram, William        | William Bertram        | tt0184410        |
| 1746498669        | 1918        | 1918        | The Guilty Man                   | The Guilty Man                   | Willat, Irvin V.        | Irvin Willat           | tt0184539        |
| 1746473716        | 1947        | 1947        | King of the Bandits              | King of the Bandits              | Cabanne, Christy        | Christy Cabanne        | tt0039533        |
| 1746493904        | 1910        | 1910        | The Modern Prodigal              | The Modern Prodigal              | Griffith, D. W.         | D.W. Griffith          | tt0001326        |
| 1746581945        | 1910        | 1910        | How Bumptious Papered the Parlor | How Bumptious Papered the Parlor | Miller, Ashley          | Ashley Miller          | tt0477316        |
| 1746508758        | 1927        | 1927        | Ladies at Ease                   | Ladies at Ease                   | Storm, Jerome           | Jerome Storm           | tt0018073        |
| 1746574695        | 1935        | 1935        | The Spanish Cape Mystery         | The Spanish Cape Mystery         | Collins, Lewis D.       | Lewis D. Collins       | tt0027028        |
| 1746453704        | 1998        | 1998        | Free Tibet                       | Free Tibet                       | Pirozek, Sarah          | Sarah Pirozek          | tt0169921        |
| 1746235363        | 1972        | 1972        | A Sense of Loss                  | A Sense of Loss                  | Ophuls, Marcel          | Marcel Ophüls          | tt0069247        |
| 1746499881        | 1948        | 1948        | Daredevils of the Clouds         | Daredevils of the Clouds         | Blair, George           | George Blair           | tt0040269        |
| 1746209491        | 1967        | 1967        | The Happiest Millionaire         | The Happiest Millionaire         | Tokar, Norman           | Norman Tokar           | tt0061749        |
| 1746422319        | 1996        | 1996        | Jack                             | Jack                             | Coppola, Francis Ford   | Francis Ford Coppola   | tt0116669        |
| 1746580237        | 1938        | 1938        | Heart of Arizona                 | Heart of Arizona                 | Selander, Lesley        | Lesley Selander        | tt0030224        |
| 1746235837        | 1977        | 1977        | Exorcist II: The Heretic         | Exorcist II: The Heretic         | Boorman, John           | John Boorman           | tt0076009        |
| 1746570262        | 1933        | 1933        | Under the Tonto Rim              | Under the Tonto Rim              | Hathaway, Henry         | Henry Hathaway         | tt0024718        |
| 1746520493        | 1927        | 1927        | Thumbs Down                      | Thumbs Down                      | Rosen, Phil             | Phil Rosen             | tt0170684        |
| 1745372561        | 2001        | 2001        | One Night at McCool's            | One Night at McCool's            | Zwart, Harald           | Harald Zwart           | tt0203755        |
| 1746424165        | 1940        | 1940        | Devil Bat                        | The Devil Bat                    | Yarbrough, Jean         | Jean Yarbrough         | tt0032390        |
| 1746465050        | 1945        | 1945        | Blood on the Sun                 | Blood on the Sun                 | Lloyd, Frank            | Frank Lloyd            | tt0037547        |
| 1746583715        | 1931        | 1931        | Hell Bound                       | Hell Bound                       | Lang, Walter            | Walter Lang            | tt0021949        |
| 1746574443        | 1951        | 1951        | Spoilers of the Plains           | Spoilers of the Plains           | Witney, William         | William Witney         | tt0044064        |
| 1746577858        | 1935        | 1935        | Mystery of Edwin Drood           | The Mystery of Edwin Drood       | Walker, Stuart          | Stuart Walker          | tt0026758        |
| 1746514660        | 1917        | 1917        | The Dark Road                    | The Dark Road                    | Miller, Charles         | Charles Miller         | tt0181443        |
| 1746514833        | 1916        | 1916        | The Secret Seven                 | The Secret Seven                 | Humphrey, William       | William Humphrey       | tt0765203        |
| 1746578811        | 1958        | 1958        | Return to Warbow                 | Return to Warbow                 | Nazarro, Ray            | Ray Nazarro            | tt0052132        |
| 1745309250        | 2006        | 2006        | Beerfest                         | Beerfest                         | Chandrasekhar, Jay      | Jay Chandrasekhar      | tt0486551        |
| 1746508536        | 1925        | 1925        | Winds of Chance                  | Winds of Chance                  | Lloyd, Frank            | Frank Lloyd            | tt0016541        |
| 1746502046        | 1914        | 1914        | Lord Chumley                     | Lord Chumley                     | Kirkwood, James         | James Kirkwood         | tt0004254        |
| 1746555756        | 1956        | 1956        | Fighting Trouble                 | Fighting Trouble                 | Blair, George           | George Blair           | tt0049208        |
| 1746422218        | 1991        | 1991        | Poison                           | Poison                           | Haynes, Todd            | Todd Haynes            | tt0102687        |

|            |      |      |                                               |                                           |                      |                     |           |
|------------|------|------|-----------------------------------------------|-------------------------------------------|----------------------|---------------------|-----------|
| 1746570399 | 1934 | 1934 | Bright Eyes                                   | Bright Eyes                               | Butler, David        | David Butler        | tt0024914 |
| 1746508223 | 1927 | 1927 | The Lunatic at Large                          | The Lunatic at Large                      | Newmeyer, Fred       | Fred C. Newmeyer    | tt0018122 |
| 1746409276 | 1987 | 1987 | Made in Heaven                                | Made in Heaven                            | Rudolph, Alan        | Alan Rudolph        | tt0093467 |
| 1746394675 | 1988 | 1988 | A Nightmare on Elm Street 4: The Dream Master | A Nightmare on Elm Street 4: The Dream Ma | Harlin, Renny        | Renny Harlin        | tt0095742 |
| 1746580765 | 1935 | 1935 | The Hoosier Schoolmaster                      | The Hoosier Schoolmaster                  | Collins, Lewis D.    | Lewis D. Collins    | tt0026492 |
| 1769970657 | 1967 | 1967 | The Old Man's Bride                           | The Old Man's Bride                       | Gunter, George       | George Gunter       | tt0062071 |
| 1746580223 | 1936 | 1936 | Winds of the Wasteland                        | Winds of the Wasteland                    | Wright, Mack V.      | Mack V. Wright      | tt0028510 |
| 1746585149 | 1928 | 1928 | Four Sons                                     | Four Sons                                 | Ford, John           | John Ford           | tt0018909 |
| 1746499839 | 1950 | 1950 | Law of the Panhandle                          | Law of the Panhandle                      | Collins, Lewis       | Lewis D. Collins    | tt0042668 |
| 1746465055 | 1945 | 1945 | Nob Hill                                      | Nob Hill                                  | Hathaway, Henry      | Henry Hathaway      | tt0037946 |
| 1746578538 | 1959 | 1959 | Juke Box Rhythm                               | Juke Box Rhythm                           | Dreifuss, Arthur     | Arthur Dreifuss     | tt0052951 |
| 1746486273 | 1917 | 1917 | The Gift Girl                                 | The Gift Girl                             | Julian, Rupert       | Rupert Julian       | tt0007999 |
| 1746561296 | 1955 | 1955 | How To Be Very, Very Popular                  | How to Be Very, Very Popular              | Johnson, Nunnally    | Nunnally Johnson    | tt0048183 |
| 1746578586 | 1951 | 1951 | The Whistle at Eaton Falls                    | The Whistle at Eaton Falls                | Siodmak, Robert      | Robert Siodmak      | tt0044212 |
| 1746501627 | 1923 | 1923 | The Lone Horseman                             | The Lone Horseman                         | Caldwell, Fred       | Fred Caldwell       | tt0175857 |
| 1746566177 | 1954 | 1953 | Miss Sadie Thompson                           | Miss Sadie Thompson                       | Bernhardt, Curtis    | Curtis Bernhardt    | tt0046076 |
| 1746532505 | 1910 | 1910 | Making a Man of Him                           | Making a Man of Him                       |                      |                     | tt0348670 |
| 1746394207 | 1989 | 1989 | Major League                                  | Major League                              | Ward, David S.       | David S. Ward       | tt0097815 |
| 1746514136 | 1927 | 1927 | In a Moment of Temptation                     | In a Moment of Temptation                 | Carle, Philip        | Philip Carle        | tt0018026 |
| 1746563629 | 1951 | 1951 | Cavalry Scout                                 | Cavalry Scout                             | Selander, Lesley     | Lesley Selander     | tt0043391 |
| 1769970564 | 1968 | 1968 | The Secret Files of Detective "X"             | The Secret Files of Detective 'X'         | Hilliard, Richard    | Richard Hilliard    | tt0257116 |
| 1746410758 | 1994 | 1994 | The Favor                                     | The Favor                                 | Petrie, Donald       | Donald Petrie       | tt0109783 |
| 1746454839 | 1944 | 1944 | The Falcon in Mexico                          | The Falcon in Mexico                      | Berke, William       | William Berke       | tt0036811 |
| 1746520614 | 1926 | 1926 | Blue Blazes                                   | Blue Blazes                               | Franz, Joseph        | Joseph Franz        | tt0016663 |
| 1746437847 | 1943 | 1943 | Hi'Ya, Chum                                   | Hi'Ya Chum                                | Young, Harold        | Harold Young        | tt0035997 |
| 1746465049 | 1944 | 1944 | Cheyenne Wildcat                              | Cheyenne Wildcat                          | Selander, Lesley     | Lesley Selander     | tt0036707 |
| 1746438322 | 1942 | 1942 | Shut My Big Mouth                             | Shut My Big Mouth                         | Barton, Charles      | Charles Barton      | tt0035324 |
| 1746572797 | 1932 | 1932 | The Big Stampede                              | The Big Stampede                          | Wright, Tenny        | Tenny Wright        | tt0022681 |
| 1746513198 | 1915 | 1915 | The Galloper                                  | The Galloper                              | MacKenzie, Donald    | Donald MacKenzie    | tt0005368 |
| 1746182925 | 1910 | 1910 | A Cheyenne Brave                              | A Cheyenne Brave                          | Young Deer, James    | James Young Deer    | tt0233435 |
| 1746553953 | 1963 | 1963 | Love Is a Ball                                | Love Is a Ball                            | Swift, David         | David Swift         | tt0057262 |
| 1746582573 | 1938 | 1938 | Reckless Living                               | Reckless Living                           | McDonald, Frank      | Frank McDonald      | tt0030660 |
| 1746419921 | 1990 | 1990 | Presumed Innocent                             | Presumed Innocent                         | Pakula, Alan J.      | Alan J. Pakula      | tt0100404 |
| 1746577428 | 1951 | 1951 | Gene Autry and the Mounties                   | Gene Autry and The Mounties               | English, John        | John English        | tt0043579 |
| 1746424602 | 1940 | 1940 | I Want a Divorce                              | I Want a Divorce                          | Murphy, Ralph        | Ralph Murphy        | tt0032619 |
| 1745293262 | 2007 | 2007 | Slipstream                                    | Slipstream                                | Hopkins, Anthony     | Anthony Hopkins     | tt0499570 |
| 1746455338 | 1997 | 1997 | I Know What You Did Last Summer               | I Know What You Did Last Summer           | Gillespie, Jim       | Jim Gillespie       | tt0119345 |
| 1746514987 | 1916 | 1916 | Revelations                                   | Revelation                                | Maude, Arthur        | Arthur Maude        | tt0248361 |
| 1746561177 | 1932 | 1932 | Ride Him, Cowboy                              | Ride Him, Cowboy                          | Allen, Fred          | Fred Allen          | tt0023396 |
| 1746553902 | 1965 | 1965 | The Raw Ones                                  | The Raw Ones                              | Lamb, John           | John Lamb           | tt0189959 |
| 1746567087 | 1933 | 1933 | Trouble Busters                               | Trouble Busters                           | Collins, Lew         | Lewis D. Collins    | tt0023621 |
| 1746475955 | 1946 | 1946 | The Postman Always Rings Twice                | The Postman Always Rings Twice            | Garnett, Tay         | Tay Garnett         | tt0038854 |
| 1746514090 | 1915 | 1915 | The Adventures of a Madcap                    | The Adventures of a Madcap                |                      |                     | tt0004860 |
| 1746582172 | 1929 | 1929 | Devil-May-Care                                | Devil May Care                            | Franklin, Sidney     | Sidney Franklin     | tt0019815 |
| 1746581873 | 1930 | 1930 | Night Work                                    | Night Work                                | Mack, Russell        | Russell Mack        | tt0021184 |
| 1746570287 | 1934 | 1934 | These Thirty Years                            | These Thirty Years                        | Pincus, David        | Dave Pincus         | tt0157108 |
| 1746515394 | 1918 | 1918 | Daybreak                                      | Daybreak                                  | Capellani, Albert    | Albert Capellani    | tt0184385 |
| 1746394201 | 1987 | 1987 | Heaven                                        | Heaven                                    | Keaton, Diane        | Diane Keaton        | tt0093166 |
| 1746199530 | 1965 | 1965 | Town Tamer                                    | Town Tamer                                | Selander, Lesley     | Lesley Selander     | tt0059824 |
| 1746513417 | 1928 | 1928 | The Last Command                              | The Last Command                          | Sternberg, Josef von | Josef von Sternberg | tt0019071 |
| 1746553697 | 1963 | 1963 | Come Blow Your Horn                           | Come Blow Your Horn                       | Yorlin, Bud          | Bud Yorlin          | tt0056940 |
| 1746233515 | 1966 | 1966 | The Chelsea Girls                             | Chelsea Girls                             | Warhol, Andy         | Paul Morrissey      | tt0061465 |
| 1746571325 | 1936 | 1936 | Fury                                          | Fury                                      | Lang, Fritz          | Fritz Lang          | tt0027652 |
| 1746409513 | 1987 | 1987 | Planes, Trains and Automobiles                | Planes, Trains & Automobiles              | Hughes, John         | John Hughes         | tt0093748 |
| 1746475496 | 1946 | 1946 | Two Guys from Milwaukee                       | Two Guys from Milwaukee                   | Butler, David        | David Butler        | tt0039053 |
| 1746549974 | 1954 | 1954 | Jungle Man-Eaters                             | Jungle Man Eaters                         | Sholem, Lee          | Lee Sholem          | tt0047139 |
| 1746572410 | 1932 | 1932 | Flames                                        | Flames                                    | Brown, Karl          | Karl Brown          | tt0022895 |

|            |      |      |                                 |                                 |                                  |                       |           |
|------------|------|------|---------------------------------|---------------------------------|----------------------------------|-----------------------|-----------|
| 1746583313 | 1929 | 1929 | Thunderbolt                     | Thunderbolt                     | Sternberg, Josef von             | Josef von Sternberg   | tt0020499 |
| 1746409368 | 1982 | 1982 | Star Trek II: The Wrath of Khan | Star Trek II: The Wrath of Khan | Meyer, Nicholas                  | Nicholas Meyer        | tt0084726 |
| 1746209414 | 1965 | 1964 | The Brig                        | The Brig                        | Mekas, Jonas; Mekas, Adolfas     | Jonas Mekas           | tt0057899 |
| 1746491783 | 1945 | 1945 | The Beautiful Cheat             | The Beautiful Cheat             | Barton, Charles                  | Charles Barton        | tt0038339 |
| 1746524502 | 1915 | 1915 | The Woman                       | A Woman                         | Melford, George                  | Charles Chaplin       | tt0006309 |
| 1746580245 | 1938 | 1938 | The Texans                      | The Texans                      | Hogan, James                     | James P. Hogan        | tt0030850 |
| 1746250163 | 1979 | 1979 | Screams of a Winter Night       | Screams of a Winter Night       | Wilson, James L.                 | James L. Wilson       | tt0079869 |
| 1746438554 | 1996 | 1996 | I Shot Andy Warhol              | I Shot Andy Warhol              | Harron, Mary                     | Mary Harron           | tt0116594 |
| 1746576998 | 1959 | 1959 | Edge of Eternity                | Edge of Eternity                | Siegel, Don                      | Don Siegel            | tt0052771 |
| 1746515998 | 1920 | 1920 | Hairpins                        | Hairpins                        | Niblo, Fred                      | Fred Niblo            | tt0011257 |
| 1746501496 | 1916 | 1916 | The Man Who Would Not Die       | The Man Who Would Not Die       | Russell, William; Prescott, John | Jack Prescott         | tt0007018 |
| 1746524017 | 1915 | 1915 | The Earl of Pawtucket           | The Earl of Pawtucket           | Myers, Harry C.                  | Harry Myers           | tt0005234 |
| 1746584094 | 1938 | 1938 | Fast Company                    | Fast Company                    | Buzzell, Edward                  | Edward Buzzell        | tt0030120 |
| 1746502210 | 1916 | 1916 | Out of the Drifts               | Out of the Drifts               | Dawley, J. Searle                | J. Searle Dawley      | tt0007150 |
| 1746569810 | 1960 | 1960 | The Hypnotic Eye                | The Hypnotic Eye                | Blair, George                    | George Blair          | tt0053931 |
| 1746235294 | 1972 | 1972 | The King of Marvin Gardens      | The King of Marvin Gardens      | Rafelson, Bob                    | Bob Rafelson          | tt0068805 |
| 1746559873 | 1963 | 1963 | The Haunted Palace              | The Haunted Palace              | Corman, Roger                    | Roger Corman          | tt0057128 |
| 1746581175 | 1960 | 1959 | Jazz on a Summer's Day          | Jazz on a Summer's Day          | Stern, Bert                      | Bert Stern            | tt0052942 |
| 1746524850 | 1915 | 1915 | The College Widow               | The College Widow               | O'Neil, Barry                    | Barry O'Neil          | tt0005106 |
| 1746507795 | 1925 | 1925 | Go Straight                     | Go Straight                     | O'Connor, Frank                  | Frank O'Connor        | tt0015862 |
| 1746454841 | 1945 | 1945 | The Crime Doctor's Courage      | The Crime Doctor's Courage      | Sherman, George                  | George Sherman        | tt0037620 |
| 1745357623 | 2001 | 2001 | A Knight's Tale                 | A Knight's Tale                 | Helgeland, Brian                 | Brian Helgeland       | tt0183790 |
| 1746440315 | 1999 | 1999 | julien donkey-boy               | Julien Donkey Boy               | Korine, Harmony                  | Harmony Korine        | tt0192194 |
| 1746569558 | 1953 | 1953 | She's Back on Broadway          | She's Back on Broadway          | Douglas, Gordon                  | Gordon Douglas        | tt0046306 |
| 1746501338 | 1916 | 1916 | Gretchen, the Greenhorn         | Gretchen the Greenhorn          | Franklin, C. M.; Franklin, S. A. | Chester M. Franklin   | tt0006745 |
| 1746514448 | 1916 | 1916 | Reclamation                     | The Reclamation                 | Sloman, Edward                   | Edward Sloman         | tt0209273 |
| 1746577334 | 1950 | 1950 | The Return of Jesse James       | The Return of Jesse James       | Hilton, Arthur David             | Arthur Hilton         | tt0042885 |
| 1746565889 | 1953 | 1953 | Girl on the Run                 | Girl on the Run                 | Lee, Joseph; Beckhard, Arthur J. | Arthur J. Beckhard    | tt0054930 |
| 1745359735 | 2008 | 2008 | Baby Mama                       | Baby Mama                       | McCullers, Michael               | Michael McCullers     | tt0871426 |
| 1746578788 | 1958 | 1958 | Gunman's Walk                   | Gunman's Walk                   | Karlson, Phil                    | Phil Karlson          | tt0051690 |
| 1746514874 | 1915 | 1915 | The Silent Voice                | The Silent Voice                | Bowman, William J.               | William Bowman        | tt0006043 |
| 1746440009 | 1998 | 1997 | Chicago Cab                     | Chicago Cab                     | Cybulski, Mary; Tintori, John    | Mary Cybulski         | tt0119278 |
| 1746394506 | 1991 | 1991 | Stone Cold                      | Stone Cold                      | Baxley, Craig R.                 | Craig R. Baxley       | tt0102984 |
| 1746473933 | 1946 | 1946 | Three Wise Fools                | Three Wise Fools                | Buzzell, Edward                  | Edward Buzzell        | tt0039031 |
| 1746209479 | 1968 | 1968 | The Lustful Turk                | The Lustful Turk                | Elliott, B. Ron                  | Byron Mabe            | tt0063252 |
| 1746508570 | 1925 | 1925 | Away in the Lead                | Away in the Lead                |                                  |                       | tt0015588 |
| 1746421227 | 1994 | 1994 | Jimmy Hollywood                 | Jimmy Hollywood                 | Levinson, Barry                  | Barry Levinson        | tt0110197 |
| 1746580980 | 1950 | 1950 | The West Point Story            | The West Point Story            | Del Ruth, Roy                    | Roy Del Ruth          | tt0043123 |
| 1745271693 | 2000 | 2000 | Urban Legends: Final Cut        | Urban Legends: Final Cut        | Ottman, John                     | John Ottman           | tt0192731 |
| 1746503314 | 1918 | 1918 | Chase Me Charlie                | Chase Me Charlie                | Chaplin, Charles                 | Charles Chaplin       | tt0175524 |
| 1746520333 | 1926 | 1926 | Ella Cinders                    | Ella Cinders                    | Green, Alfred E.                 | Alfred E. Green       | tt0016822 |
| 1746530756 | 1950 | 1950 | Dark City                       | Dark City                       | Dieterle, William                | William Dieterle      | tt0042379 |
| 1746582799 | 1935 | 1935 | Man of Iron                     | Man of Iron                     | McGann, William                  | William C. McGann     | tt0026674 |
| 1746474828 | 1948 | 1948 | Canon City                      | Canon City                      | Wilbur, Crane                    | Crane Wilbur          | tt0040210 |
| 1746554501 | 1963 | 1963 | Hothead                         | Hothead                         | Mann, Edward                     | Edward Mann           | tt0057158 |
| 1745303228 | 2006 | 2006 | An Inconvenient Truth           | An Inconvenient Truth           | Guggenheim, Davis                | Davis Guggenheim      | tt0497116 |
| 1746497450 | 1918 | 1918 | Her One Mistake                 | Her One Mistake                 | Le Saint, Edward J.              | Edward LeSaint        | tt0009167 |
| 1746435861 | 1992 | 1992 | Bad Lieutenant                  | Bad Lieutenant                  | Ferrara, Abel                    | Abel Ferrara          | tt0103759 |
| 1746566773 | 1932 | 1932 | Self-Defense                    | Self Defense                    | Rosen, Phil                      | Phil Rosen            | tt0024542 |
| 1746523713 | 1916 | 1916 | A Night Out                     | A Night Out                     | Baker, George D.                 | George D. Baker       | tt0005811 |
| 1746570025 | 1934 | 1934 | The Return of Chandu            | The Return of Chandu            |                                  | Ray Taylor            | tt0025712 |
| 1746577144 | 1960 | 1960 | Cage of Evil                    | Cage of Evil                    | Cahn, Edward L.                  | Edward L. Cahn        | tt0053689 |
| 1746516121 | 1922 | 1922 | Across the Dead-Line            | Across the Deadline             | Conway, Jack                     | Jack Conway           | tt0012878 |
| 1746514350 | 1917 | 1917 | The Secret Man                  | The Secret Man                  | Ford, Jack                       | John Ford             | tt0008551 |
| 1746520499 | 1927 | 1927 | The Lure of the Night Club      | Lure of the Night Club          | Buckingham, Thomas               | Tom Buckingham        | tt0018125 |
| 1746499984 | 1924 | 1924 | The Beautiful Sinner            | The Beautiful Sinner            | Van Dyke, W. S.                  | W.S. Van Dyke         | tt0014703 |
| 1745375265 | 2008 | 2008 | Witless Protection              | Witless Protection              | Carner, Charles Robert           | Charles Robert Carner | tt1001562 |

|            |      |      |                                      |                                      |                        |                        |           |
|------------|------|------|--------------------------------------|--------------------------------------|------------------------|------------------------|-----------|
| 1745342832 | 2003 | 2003 | Calendar Girls                       | Calendar Girls                       | Cole, Nigel            | Nigel Cole             | tt0337909 |
| 1746566132 | 1955 | 1955 | We're No Angels                      | We're No Angels                      | Curtiz, Michael        | Michael Curtiz         | tt0048801 |
| 1745359475 | 2004 | 2004 | Team America: World Police           | Team America: World Police           | Parker, Trey           | Trey Parker            | tt0372588 |
| 1746574554 | 1935 | 1935 | Courageous Avenger                   | The Courageous Avenger               | Bradbury, Robert N.    | Robert N. Bradbury     | tt0026241 |
| 1746498673 | 1918 | 1918 | The Model's Confession               | A Model's Confession                 | Park, Ida May          | Ida May Park           | tt0009383 |
| 1746555403 | 1955 | 1955 | Canyon Crossroads                    | Canyon Crossroads                    | Werker, Alfred L.      | Alfred L. Werker       | tt0047917 |
| 1746580902 | 1936 | 1936 | The Last Outlaw                      | The Last Outlaw                      | Cabanne, Christy       | Christy Cabanne        | tt0027868 |
| 1746578597 | 1962 | 1962 | Four for the Morgue                  | Four for the Morgue                  | Sledge, John           | John Sledge            | tt0212949 |
| 1746422292 | 1992 | 1992 | Hugh Hefner: Once Upon a Time        | Hugh Hefner: Once Upon a Time        | Heath, Robert          | Robert Heath           | tt0104461 |
| 1746514515 | 1916 | 1916 | The Other Girl                       | The Other Girl                       | Winter, Percy          | Percy Winter           | tt0163131 |
| 1746434893 | 1993 | 1993 | Another Stakeout                     | Another Stakeout                     | Badham, John           | John Badham            | tt0106292 |
| 1769970422 | 1967 | 1967 | I, Marquis de Sade                   | I, Marquis de Sade                   | Hilliard, Richard      | Richard Hilliard       | tt0220568 |
| 1746584933 | 1940 | 1940 | Babies for Sale                      | Babies for Sale                      | Barton, Charles        | Charles Barton         | tt0032231 |
| 1746580574 | 1937 | 1937 | Blake of Scotland Yard               | Blake of Scotland Yard               | Hill, Bob              | Robert F. Hill         | tt0028637 |
| 1769974254 | 1916 | 1916 | A Duel in the Desert                 | The Duel in the Desert               | Horne, James W.        | James W. Horne         | tt3140210 |
| 1745303206 | 2006 | 2005 | The Great New Wonderful              | The Great New Wonderful              | Leiner, Danny          | Danny Leiner           | tt0402230 |
| 1746532727 | 1916 | 1916 | The Red Mouse                        | The Red Mouse                        | Noble, John W.         | John W. Noble          | tt0158890 |
| 1746524361 | 1927 | 1927 | The Cherokee Kid                     | The Cherokee Kid                     | De Lacy, Robert        | Robert De Lacey        | tt0017749 |
| 1746393013 | 1984 | 1984 | Up the Creek                         | Up the Creek                         | Butler, Robert         | Robert Butler          | tt0088333 |
| 1746582804 | 1936 | 1936 | Hollywood Boulevard                  | Hollywood Boulevard                  | Florey, Robert         | Robert Florey          | tt0027757 |
| 1746421631 | 1940 | 1940 | Adventure in Diamonds                | Adventure in Diamonds                | Fitzmaurice, Geo.      | George Fitzmaurice     | tt0032183 |
| 1746493989 | 1910 | 1910 | The Way of the World                 | The Way of the World                 | Griffith, D. W.        | D.W. Griffith          | tt0001446 |
| 1746534792 | 1920 | 1920 | The Family Honor                     | The Family Honor                     | Vidor, King W.         | King Vidor             | tt0011172 |
| 1746520655 | 1948 | 1948 | Whirlwind Raiders                    | Whirlwind Raiders                    | Keays, Vernon          | Vernon Keays           | tt0040964 |
| 1746579026 | 1963 | 1963 | Goldilocks and the Three Bares       | Goldilocks and the Three Bares       | Gordon, Lewis H.       | Herschell Gordon Lewis | tt0057111 |
| 1769970673 | 1968 | 1968 | Acapulco Uncensored                  | Acapulco Uncensored                  |                        | Donald A. Davis        | tt0209886 |
| 1746584565 | 1931 | 1931 | The Road to Reno                     | The Road to Reno                     | Wallace, Richard       | Richard Wallace        | tt0022320 |
| 1746454484 | 1941 | 1941 | The Kid from Kansas                  | The Kid from Kansas                  | Nigh, William          | William Nigh           | tt0033783 |
| 1746410155 | 1987 | 1987 | Police Academy 4: Citizens On Patrol | Police Academy 4: Citizens on Patrol | Drake, Jim             | Jim Drake              | tt0093756 |
| 1746571380 | 1932 | 1932 | Huddle                               | Huddle                               |                        | Sam Wood               | tt0023034 |
| 1746410687 | 1986 | 1986 | Out of Bounds                        | Out of Bounds                        | Tuggle, Richard        | Richard Tuggle         | tt0091706 |
| 1746574770 | 1935 | 1935 | Unconquered Bandit                   | Unconquered Bandit                   | Webb, Harry S.         | Harry S. Webb          | tt0027153 |
| 1746513667 | 1923 | 1923 | The Last Moment                      | The Last Moment                      |                        | J. Parker Read Jr.     | tt0014188 |
| 1746582778 | 1938 | 1938 | Crime Takes a Holiday                | Crime Takes a Holiday                | Collins, Lewis D.      | Lewis D. Collins       | tt0030027 |
| 1746562177 | 1953 | 1953 | Murder Without Tears                 | Murder Without Tears                 | Beaudine, William      | William Beaudine       | tt0046105 |
| 1746507720 | 1926 | 1927 | The Fighting Stallion                | The Fighting Stallion                | Wilson, Ben            | Ben F. Wilson          | tt0016867 |
| 1746453466 | 1944 | 1944 | Strangers in the Night               | Strangers in the Night               | Mann, Anthony          | Anthony Mann           | tt0037318 |
| 1746467639 | 1917 | 1917 | Happiness                            | Happiness                            | Barker, Reginald       | Reginald Barker        | tt0008044 |
| 1746583893 | 1928 | 1928 | Driftin' Sands                       | Driftin' Sands                       | Fox, Wallace W.        | Wallace Fox            | tt0018852 |
| 1746580535 | 1936 | 1936 | Yellowstone                          | Yellowstone                          | Lubin, Arthur          | Arthur Lubin           | tt0028523 |
| 1746520715 | 1950 | 1949 | My Foolish Heart                     | My Foolish Heart                     | Robson, Mark           | Mark Robson            | tt0041672 |
| 1746436281 | 1998 | 1998 | How Stella Got Her Groove Back       | How Stella Got Her Groove Back       | Sullivan, Kevin Rodney | Kevin Rodney Sullivan  | tt0120703 |
| 1746219753 | 1977 | 1977 | Chatterbox!                          | Chatterbox!                          | De Simone, Tom         | Tom DeSimone           | tt0075830 |
| 1746492562 | 1944 | 1944 | Something for the Boys               | Something for the Boys               | Seiler, Lewis          | Lewis Seiler           | tt0037295 |
| 1746586170 | 1940 | 1940 | The Great Profile                    | The Great Profile                    | Lang, Walter           | Walter Lang            | tt0032556 |
| 1746514619 | 1915 | 1915 | Blackbirds                           | Blackbirds                           | McGowan, J. P.         | J.P. McGowan           | tt0004978 |
| 1746487827 | 1918 | 1918 | The Whirlpool                        | The Whirlpool                        | Crosland, Alan         | Alan Crosland          | tt0009795 |
| 1746569845 | 1958 | 1957 | Old Yeller                           | Old Yeller                           | Stevenson, Robert      | Robert Stevenson       | tt0050798 |
| 1746394509 | 1982 | 1982 | The Beach Girls                      | The Beach Girls                      | Townsend, Pat          | Bud Townsend           | tt0083628 |
| 1746492507 | 1947 | 1947 | The Fabulous Texan                   | The Fabulous Texan                   | Ludwig, Edward         | Edward Ludwig          | tt0039367 |
| 1746410363 | 1985 | 1985 | Movers & Shakers                     | Movers & Shakers                     | Asher, William         | William Asher          | tt0089628 |
| 1746581740 | 1928 | 1928 | Undressed                            | Undressed                            | Rosen, Philip          | Phil Rosen             | tt0019510 |
| 1746474396 | 1948 | 1948 | Key Largo                            | Key Largo                            | Huston, John           | John Huston            | tt0040506 |
| 1746574645 | 1934 | 1934 | Once to Every Woman                  | Once to Every Woman                  | Hillyer, Lambert       | Lambert Hillyer        | tt0025596 |
| 1746454401 | 1942 | 1942 | Parachute Nurse                      | Parachute Nurse                      | Barton, Charles        | Charles Barton         | tt0035172 |
| 1746497643 | 1917 | 1917 | The Haunted Pajamas                  | The Haunted Pajamas                  | Balshofer, Fred J.     | Fred J. Balshofer      | tt0008053 |
| 1746582417 | 1938 | 1938 | Hawaiian Buckaroo                    | Hawaiian Buckaroo                    | Taylor, Ray            | Ray Taylor             | tt0030218 |

|            |      |      |                                      |                                      |                                   |                    |           |
|------------|------|------|--------------------------------------|--------------------------------------|-----------------------------------|--------------------|-----------|
| 1746577700 | 1933 | 1933 | Notorious but Nice                   | Notorious But Nice                   | Thorpe, Richard                   | Richard Thorpe     | tt0024394 |
| 1746465020 | 1944 | 1944 | Louisiana Hayride                    | Louisiana Hayride                    | Barton, Charles                   | Charles Barton     | tt0037028 |
| 1746501677 | 1923 | 1923 | Michael O'Halloran                   | Michael O'Halloran                   | Meehan, James Leo                 | James Leo Meehan   | tt0014271 |
| 1746492709 | 1947 | 1947 | The Arnelo Affair                    | The Arnelo Affair                    | Oboler, Arch                      | Arch Oboler        | tt0039160 |
| 1746420216 | 1991 | 1991 | Hook                                 | Hook                                 | Spielberg, Steven                 | Steven Spielberg   | tt0102057 |
| 1746218828 | 1973 | 1973 | Manson                               | Manson                               | Merrick, Laurence                 | Robert Hendrickson | tt0068918 |
| 1746566104 | 1958 | 1958 | The Naked and the Dead               | The Naked and the Dead               | Walsh, Raoul                      | Raoul Walsh        | tt0051978 |
| 1746492493 | 1948 | 1948 | The Paleface                         | The Paleface                         | McLeod, Norman Z.                 | Norman Z. McLeod   | tt0040679 |
| 1746197936 | 1966 | 1966 | Crazy Quilt                          | The Crazy Quilt                      | Korty, John                       | John Korty         | tt0060260 |
| 1746453517 | 1941 | 1941 | The People vs. Dr. Kildare           | The People vs. Dr. Kildare           | Bucquet, Harold S.                | Harold S. Bucquet  | tt0034013 |
| 1746474125 | 1945 | 1945 | Zombies on Broadway                  | Zombies on Broadway                  | Douglas, Gordon                   | Gordon Douglas     | tt0038270 |
| 1746393762 | 1981 | 1981 | Nighthawks                           | Nighthawks                           | Malmuth, Bruce                    | Bruce Malmuth      | tt0082817 |
| 1746574118 | 1957 | 1957 | The Sun Also Rises                   | The Sun Also Rises                   | King, Henry                       | Henry King         | tt0051028 |
| 1746393294 | 1981 | 1980 | The Earthling                        | The Earthling                        | Collinson, Peter                  | Peter Collinson    | tt0080671 |
| 1746185703 | 1965 | 1964 | The Train                            | The Train                            | Frankenheimer, John; Penn, Arthur | John Frankenheimer | tt0059825 |
| 1746232937 | 1969 | 1969 | The Learning Tree                    | The Learning Tree                    | Parks, Gordon                     | Gordon Parks       | tt0064579 |
| 1746436375 | 1943 | 1942 | Eyes of the Underworld               | Eyes of the Underworld               | Neill, Roy William                | Roy William Neill  | tt0035850 |
| 1746524236 | 1915 | 1915 | Hearts in Exile                      | Hearts in Exile                      | Young, James                      | James Young        | tt0005460 |
| 1746570137 | 1934 | 1934 | Guilty Parents                       | Guilty Parents                       | Townley, Jack                     | Jack Townley       | tt0025210 |
| 1746577824 | 1939 | 1938 | Gang Smashers                        | Gang Smashers                        | Popkin, Leo C.                    | Leo C. Popkin      | tt0135426 |
| 1746464922 | 1941 | 1941 | The Forgotten Village                | The Forgotten Village                | Kline, Herbert                    | Herbert Kline      | tt0033623 |
| 1746553737 | 1965 | 1965 | Crack in the World                   | Crack in the World                   | Marton, Andrew                    | Andrew Marton      | tt0059065 |
| 1746514263 | 1910 | 1910 | Sunshine Sue                         | Sunshine Sue                         | Griffith, D. W.                   | D.W. Griffith      | tt0001407 |
| 1746434034 | 1997 | 1997 | Fathers' Day                         | Fathers' Day                         | Reitman, Ivan                     | Ivan Reitman       | tt0119109 |
| 1746203223 | 1970 | 1970 | Watermelon Man                       | Watermelon Man                       | Van Peebles, Melvin               | Melvin Van Peebles | tt0066550 |
| 1746583834 | 1930 | 1930 | Children of Pleasure                 | Children of Pleasure                 | Beaumont, Harry                   | Harry Beaumont     | tt0020763 |
| 1746498677 | 1922 | 1922 | Bing Bang Boom                       | Bing Bang Boom                       | Butler, Fred J.                   | Fred J. Butler     | tt0012942 |
| 1746571300 | 1935 | 1935 | The Law of 45's                      | The Law of 45's                      | McCarthy, John P.                 | John P. McCarthy   | tt0026612 |
| 1746577432 | 1950 | 1950 | The Strip-Tease Murder Case          | The Strip Tease Murder Case          | Prince, Hugh                      | Hugh Prince        | tt0043009 |
| 1746520686 | 1925 | 1925 | Tearing Through                      | Tearing Through                      | Rosson, Arthur                    | Arthur Rosson      | tt0168213 |
| 1746514127 | 1915 | 1915 | Ghosts                               | Ghosts                               | Nicholls, George                  | George Nichols     | tt0005381 |
| 1746509460 | 1925 | 1925 | Sporting Life                        | Sporting Life                        | Tourneur, Maurice                 | Maurice Tourneur   | tt0016389 |
| 1746198887 | 1969 | 1969 | The Activist                         | The Activist                         | Napoleon, Art                     | Art Napoleon       | tt0063984 |
| 1746581271 | 1950 | 1950 | Sierra Passage                       | Sierra Passage                       | McDonald, Frank                   | Frank McDonald     | tt0042964 |
| 1746569727 | 1954 | 1954 | Tennessee Champ                      | Tennessee Champ                      | Wilcox, Fred M.                   | Fred M. Wilcox     | tt0047566 |
| 1746573065 | 1932 | 1932 | Big City Blues                       | Big City Blues                       | LeRoy, Mervyn                     | Mervyn LeRoy       | tt0022676 |
| 1746499914 | 1923 | 1923 | Gimme                                | Gimme                                | Hughes, Rupert                    | Rupert Hughes      | tt0014082 |
| 1746485620 | 1918 | 1918 | Riders of the Purple Sage            | Riders of the Purple Sage            | Lloyd, Frank                      | Frank Lloyd        | tt0009552 |
| 1746410190 | 1985 | 1985 | Turk 182!                            | Turk 182!                            | Clark, Bob                        | Bob Clark          | tt0090217 |
| 1746467070 | 1917 | 1917 | The Mate of the Sally Ann            | The Mate of the Sally Ann            | King, Henry                       | Henry King         | tt0008278 |
| 1746475920 | 1946 | 1946 | Adventure                            | Adventure                            | Fleming, Victor                   | Leonard Anderson   | tt1144467 |
| 1746503348 | 1920 | 1919 | Vengeance and the Girl               | Vengeance and the Girl               | De La Mothe, Leon                 | Leon De La Mothe   | tt0010838 |
| 1745341869 | 2010 | 2010 | Cool It                              | Cool It                              | Timoner, Ondi                     | Ondi Timoner       | tt1694015 |
| 1746465035 | 1942 | 1942 | United We Stand                      | United We Stand                      |                                   |                    | tt0954353 |
| 1746566224 | 1953 | 1953 | Ambush at Tomahawk Gap               | Ambush at Tomahawk Gap               | Sears, Fred F.                    | Fred F. Sears      | tt0045502 |
| 1746496129 | 1919 | 1919 | Wanted: A Husband                    | Wanted: A Husband                    | Windom, Lawrence C.               | Lawrence C. Windom | tt0010856 |
| 1746523324 | 1915 | 1915 | The Buzzard's Shadow                 | The Buzzard's Shadow                 | Ricketts, Thomas                  | Tom Ricketts       | tt0005043 |
| 1746435272 | 1942 | 1942 | Tombstone: The Town Too Tough to Die | Tombstone: The Town Too Tough to Die | McGann, William                   | William C. McGann  | tt0035450 |
| 1746516037 | 1920 | 1920 | His House in Order                   | His House in Order                   | Ford, Hugh                        | Hugh Ford          | tt0011296 |
| 1746561233 | 1932 | 1932 | Tomorrow and Tomorrow                | Tomorrow and Tomorrow                | Wallace, Richard                  | Richard Wallace    | tt0022487 |
| 1746475912 | 1945 | 1944 | Thirty Seconds Over Tokyo            | Thirty Seconds Over Tokyo            | LeRoy, Mervyn                     | Mervyn LeRoy       | tt0037366 |
| 1746576841 | 1932 | 1932 | The Golden West                      | The Golden West                      | Howard, David                     | David Howard       | tt0022953 |
| 1746186302 | 1968 | 1968 | Hellfighters                         | Hellfighters                         | McLaglen, Andrew V.               | Andrew V. McLaglen | tt0063060 |
| 1746500583 | 1925 | 1925 | Share and Share Alike                | Share and Share Alike                | Bennett, Whitman                  | Whitman Bennett    | tt0163825 |
| 1745359040 | 2004 | 2004 | Little Black Book                    | Little Black Book                    | Hurran, Nick                      | Nick Hurran        | tt0361841 |
| 1746567228 | 1932 | 1932 | The Final Edition                    | The Final Edition                    | Higgin, Howard                    | Howard Higgin      | tt0022888 |
| 1746575351 | 1932 | 1932 | Devil and the Deep                   | Devil and the Deep                   | Gering, Marion                    | Marion Gering      | tt0022814 |

|            |      |      |                               |                               |                                       |                          |           |
|------------|------|------|-------------------------------|-------------------------------|---------------------------------------|--------------------------|-----------|
| 1746500409 | 1924 | 1924 | The Law Forbids               | The Law Forbids               | Robbins, Jesse                        | Jess Robbins             | tt0015056 |
| 1746514411 | 1910 | 1910 | The Sheriff                   | The Sheriff                   |                                       | Francis Boggs            | tt0354912 |
| 1746421972 | 1996 | 1996 | Ghosts of Mississippi         | Ghosts of Mississippi         | Reiner, Rob                           | Rob Reiner               | tt0116410 |
| 1746502065 | 1922 | 1922 | The Curse of Drink            | The Curse of Drink            | Hoyt, Harry O.                        | Harry O. Hoyt            | tt0013044 |
| 1746497221 | 1918 | 1918 | A Weaver of Dreams            | A Weaver of Dreams            | Collins, John H.                      | John H. Collins          | tt0009783 |
| 1746409463 | 1985 | 1985 | Silverado                     | Silverado                     | Kasdan, Lawrence                      | Lawrence Kasdan          | tt0090022 |
| 1746583869 | 1929 | 1929 | Tonight at Twelve             | Tonight at Twelve             | Pollard, Harry A.                     | Harry A. Pollard         | tt0020511 |
| 1746500712 | 1927 | 1927 | She's My Baby                 | She's My Baby                 | Windemere, Fred                       | Fred Windemere           | tt0018385 |
| 1746563864 | 1953 | 1953 | The Affairs of Dobie Gillis   | The Affairs of Dobie Gillis   | Weis, Don                             | Don Weis                 | tt0045479 |
| 1746435117 | 1940 | 1940 | The Quarterback               | The Quarterback               | Humberstone, H. Bruce                 | H. Bruce Humberstone     | tt0032957 |
| 1746574222 | 1959 | 1959 | The Big Operator              | The Big Operator              | Haas, Charles                         | Charles F. Haas          | tt0052629 |
| 1746532409 | 1927 | 1927 | A Gentleman of Paris          | A Gentleman of Paris          | D'Arrast, Harry d'Abbadie             | Harry d'Abbadie d'Arrast | tt0017926 |
| 1746565974 | 1953 | 1953 | Remains to Be Seen            | Remains to Be Seen            | Weis, Don                             | Don Weis                 | tt0046235 |
| 1746466900 | 1917 | 1917 | The Price of Her Soul         | The Price of Her Soul         | Apfel, Oscar                          | Oscar Apfel              | tt0008451 |
| 1746554576 | 1963 | 1963 | The Ugly American             | The Ugly American             | Englund, George                       | George Englund           | tt0056632 |
| 1746584155 | 1938 | 1938 | Swing That Cheer              | Swing That Cheer              | Schuster, Harold                      | Harold D. Schuster       | tt0030819 |
| 1746424556 | 1943 | 1943 | Passport to Suez              | Passport to Suez              | DeToth, Andre                         | André DeToth             | tt0036253 |
| 1746419206 | 1990 | 1990 | The First Power               | The First Power               | Resnikoff, Robert                     | Robert Resnikoff         | tt0099578 |
| 1746419610 | 1986 | 1986 | Off Beat                      | Off Beat                      | Dinner, Michael                       | Michael Dinner           | tt0091668 |
| 1746465378 | 1947 | 1947 | Fall Guy                      | Fall Guy                      | Le Borg, Reginald                     | Reginald Le Borg         | tt0039368 |
| 1746570736 | 1934 | 1934 | Viva Villa                    | Viva Villa!                   | Conway, Jack; Hawks, Howard           | Jack Conway              | tt0025948 |
| 1746474114 | 1948 | 1948 | Bodyguard                     | Bodyguard                     | Fleischer, Richard O.                 | Richard Fleischer        | tt0040178 |
| 1746497037 | 1920 | 1920 | It's a Great Life             | It's a Great Life             | Hopper, E. Mason                      | E. Mason Hopper          | tt0143313 |
| 1746560633 | 1932 | 1932 | Behind Jury Doors             | Behind Jury Doors             | Eason, Breezy                         | B. Reeves Eason          | tt0023792 |
| 1746566994 | 1952 | 1952 | Lone Star                     | Lone Star                     | Sherman, Vincent                      | Vincent Sherman          | tt0043751 |
| 1746584653 | 1929 | 1929 | The Four Feathers             | The Four Feathers             | Cooper, Merian C.; Schoedsack, Erne   | Merian C. Cooper         | tt0018908 |
| 1746234380 | 1968 | 1968 | The Scalphunters              | The Scalphunters              | Pollack, Sydney                       | Sydney Pollack           | tt0063557 |
| 1746571333 | 1931 | 1931 | Cimarron                      | Cimarron                      | Ruggles, Wesley                       | Wesley Ruggles           | tt0021746 |
| 1746581245 | 1951 | 1951 | Desert of Lost Men            | Desert of Lost Men            | Keller, Harry                         | Harry Keller             | tt0043462 |
| 1746565968 | 1953 | 1953 | Topeka                        | Topeka                        | Carr, Thomas                          | Thomas Carr              | tt0046445 |
| 1746581755 | 1910 | 1910 | The Girl Spy Before Vicksburg | The Girl Spy Before Vicksburg | Olcott, Sidney                        | Sidney Olcott            | tt0255193 |
| 1746504371 | 1917 | 1917 | The War of the Tongs          | The War of the Tongs          |                                       | H. O. Davis              | tt0008749 |
| 1746584385 | 1940 | 1940 | The Howards of Virginia       | The Howards of Virginia       | Lloyd, Frank                          | Frank Lloyd              | tt0032612 |
| 1769971149 | 1969 | 1969 | The Screentest Girls          | The Screentest Girls          | S., Zoltan                            | Zoltan G. Spencer        | tt0127807 |
| 1746424052 | 1940 | 1940 | Up in the Air                 | Up in the Air                 | Bretherton, Howard                    | Howard Bretherton        | tt0033214 |
| 1746512457 | 1917 | 1917 | As Man Made Her               | As Man Made Her               | Archainbaud, George                   | George Archainbaud       | tt0007652 |
| 1746514855 | 1916 | 1916 | The Valiants of Virginia      | The Valiants of Virginia      | Heffron, T. N.                        | Thomas N. Heffron        | tt0007508 |
| 1746577114 | 1951 | 1951 | The Redhead and the Cowboy    | The Redhead and the Cowboy    | Fenton, Leslie                        | Leslie Fenton            | tt0042881 |
| 1746562457 | 1957 | 1957 | The Night Runner              | The Night Runner              | Biberman, Abner                       | Abner Biberman           | tt0050764 |
| 1746562450 | 1954 | 1954 | Track of the Cat              | Track of the Cat              | Wellman, William A.                   | William A. Wellman       | tt0047603 |
| 1746508466 | 1925 | 1925 | An Enemy Of Men               | An Enemy of Men               | Strayer, Frank R.                     | Frank R. Strayer         | tt0016824 |
| 1746492453 | 1944 | 1944 | The Pinto Bandit              | The Pinto Bandit              | Clifton, Elmer                        | Elmer Clifton            | tt0037176 |
| 1746583573 | 1930 | 1930 | Remote Control                | Remote Control                | St. Clair, Malcolm; Grinde, Nick; Sed | Nick Grinde              | tt0021294 |
| 1746555925 | 1954 | 1954 | Hell and High Water           | Hell and High Water           | Fuller, Samuel                        | Samuel Fuller            | tt0047073 |
| 1746501011 | 1916 | 1916 | Jane's Husband                | Jane's Husband                | Baker, George D.                      | George D. Baker          | tt0223565 |
| 1746487045 | 1918 | 1918 | Life or Honor?                | Life or Honor?                | Lawrence, Edmund                      | Edmund Lawrence          | tt0009299 |
| 1746453970 | 1998 | 1998 | Armageddon                    | Armageddon                    | Bay, Michael                          | Michael Bay              | tt0120591 |
| 1746574673 | 1935 | 1935 | The County Chairman           | The County Chairman           | Blystone, John                        | John G. Blystone         | tt0026239 |
| 1746584378 | 1939 | 1939 | Beware, Spooks!               | Beware Spooks!                | Sedgwick, Edward                      | Edward Sedgwick          | tt0031095 |
| 1746420355 | 1988 | 1988 | Nightfall                     | Nightfall                     | Mayersberg, Paul                      | Paul Mayersberg          | tt0095738 |
| 1746216674 | 1967 | 1967 | The Dirty Dozen               | The Dirty Dozen               | Aldrich, Robert                       | Robert Aldrich           | tt0061578 |
| 1745293902 | 2006 | 2006 | Poseidon                      | Poseidon                      | Petersen, Wolfgang                    | Wolfgang Petersen        | tt0409182 |
| 1746464769 | 1946 | 1946 | Child of Divorce              | Child of Divorce              | Fleischer, Richard O.                 | Richard Fleischer        | tt0038411 |
| 1746210532 | 1971 | 1971 | The Murder of Fred Hampton    | The Murder of Fred Hampton    | Gray, Mike                            | Howard Alk               | tt0067456 |
| 1746532981 | 1927 | 1927 | Code of the Range             | Code of the Range             | Cohn, Bennett; Schlank, Morris R.     | Bennett Cohn             | tt0312576 |
| 1746453823 | 1941 | 1941 | I'll Sell My Life             | I'll Sell My Life             | Clifton, Elmer                        | Elmer Clifton            | tt0033747 |
| 1746570576 | 1952 | 1952 | Red Ball Express              | Red Ball Express              | Boetticher, Budd                      | Budd Boetticher          | tt0045072 |

|            |      |      |                                                |                                               |                                       |                         |           |
|------------|------|------|------------------------------------------------|-----------------------------------------------|---------------------------------------|-------------------------|-----------|
| 1746504222 | 1920 | 1920 | High Speed                                     | High Speed                                    | Miller, Charles                       | Charles Miller          | tt0195781 |
| 1746500688 | 1926 | 1926 | Obey the Law                                   | Obey the Law                                  | Raboch, Alfred                        | Alfred Raboch           | tt0017217 |
| 1746583096 | 1938 | 1938 | Outlaws of Sonora                              | Outlaws of Sonora                             | Sherman, George                       | George Sherman          | tt0030538 |
| 1746582768 | 1936 | 1936 | Border Flight                                  | Border Flight                                 | Lovering, Otho                        | Otho Lovering           | tt0027383 |
| 1746584482 | 1930 | 1930 | Sinners' Holiday                               | Sinners' Holiday                              | Adolfi, John G.                       | John G. Adolfi          | tt0021381 |
| 1746408486 | 1986 | 1986 | Invaders from Mars                             | Invaders from Mars                            | Hooper, Tobe                          | Tobe Hooper             | tt0091276 |
| 1746520684 | 1926 | 1926 | Lightning Bill                                 | Lightning Bill                                | Chaudet, Louis                        | Louis Chaudet           | tt0017066 |
| 1746269637 | 1980 | 1980 | A Small Circle of Friends                      | A Small Circle of Friends                     | Cohen, Rob                            | Rob Cohen               | tt0081528 |
| 1746436636 | 1941 | 1941 | Ride, Kelly, Ride                              | Ride, Kelly, Ride                             | Foster, Norman                        | Norman Foster           | tt0034101 |
| 1746249270 | 1975 | 1975 | Johnny Firecloud                               | Johnny Firecloud                              | Castleman, William A.                 | William Allen Castleman | tt0073210 |
| 1746555426 | 1954 | 1954 | Silver Lode                                    | Silver Lode                                   | Dwan, Allan                           | Allan Dwan              | tt0047495 |
| 1746567989 | 1933 | 1933 | Ace of Aces                                    | Ace of Aces                                   | Ruben, J. Walter                      | J. Walter Ruben         | tt0023737 |
| 1746542651 | 1924 | 1924 | Who's Cheating?                                | Who's Cheating?                               | Levering, Joseph                      | Joseph Levering         | tt0015496 |
| 1745374755 | 2009 | 2009 | Confessions of a Shopaholic                    | Confessions of a Shopaholic                   | Hogan, P. J.                          | P.J. Hogan              | tt1093908 |
| 1746503969 | 1919 | 1919 | Daring Hearts                                  | Daring Hearts                                 | Houry, Henry                          | Henry Houry             | tt0010047 |
| 1746509319 | 1926 | 1926 | The Checkered Flag                             | The Checkered Flag                            | Adolfi, John G.                       | John G. Adolfi          | tt0016720 |
| 1746492729 | 1947 | 1947 | Last Frontier Uprising                         | Last Frontier Uprising                        | Selander, Lesley                      | Lesley Selander         | tt0039552 |
| 1746465394 | 1947 | 1947 | The Long Night                                 | The Long Night                                | Litvak, Anatole                       | Anatole Litvak          | tt0039581 |
| 1746424204 | 1942 | 1942 | Heart of the Golden West                       | Heart of the Golden West                      | Kane, Joseph                          | Joseph Kane             | tt0034832 |
| 1746582440 | 1938 | 1938 | White Banners                                  | White Banners                                 | Goulding, Edmund                      | Edmund Goulding         | tt0030973 |
| 1746235393 | 1974 | 1974 | Dynamite Brothers                              | Dynamite Brothers                             | Adamson, Al                           | Al Adamson              | tt0132933 |
| 1746393360 | 1984 | 1984 | Sheena                                         | Sheena                                        | Guillermin, John                      | John Guillermin         | tt0088103 |
| 1746564784 | 1953 | 1953 | Confidentially Connie                          | Confidentially Connie                         | Buzzell, Edward                       | Edward Buzzell          | tt0045644 |
| 1746453915 | 2000 | 2000 | Wonder Boys                                    | Wonder Boys                                   | Hanson, Curtis                        | Curtis Hanson           | tt0185014 |
| 1746524538 | 1927 | 1927 | After Midnight                                 | After Midnight                                | Bell, Monta                           | Monta Bell              | tt0017593 |
| 1746581680 | 1928 | 1928 | Romance of a Rogue                             | Romance of a Rogue                            | Baggot, King                          | King Baggot             | tt0019334 |
| 1746532440 | 1910 | 1910 | You Saved My Life                              | You Saved My Life                             |                                       |                         | tt1896861 |
| 1746574421 | 1963 | 1963 | The Man From the Diners' Club                  | The Man from the Diners' Club                 | Tashlin, Frank                        | Frank Tashlin           | tt0057284 |
| 1746512615 | 1916 | 1916 | The Last Man                                   | The Last Man                                  | Wolbert, William                      | William Wolbert         | tt0006910 |
| 1746453531 | 1943 | 1942 | Sherlock Holmes and the Secret Weapon          | Sherlock Holmes and the Secret Weapon         | Neill, Roy William                    | Roy William Neill       | tt0035317 |
| 1746525061 | 1920 | 1920 | Wings of Pride                                 | Wings of Pride                                | Rolfe, B. A.                          | B.A. Rolfe              | tt0203205 |
| 1746454931 | 1942 | 1942 | Secrets of the Underground                     | Secrets of the Underground                    | Morgan, William                       | William Morgan          | tt0036338 |
| 1746497873 | 1919 | 1919 | Easy to Make Money                             | Easy to Make Money                            | Carewe, Edwin                         | Edwin Carewe            | tt0010080 |
| 1746566639 | 1952 | 1952 | Without Warning!                               | Without Warning!                              | Laven, Arnold                         | Arnold Laven            | tt0045334 |
| 1746574350 | 1961 | 1961 | The Big Gamble                                 | The Big Gamble                                | Fleischer, Richard                    | Richard Fleischer       | tt0054679 |
| 1746580332 | 1937 | 1937 | Nothing Sacred                                 | Nothing Sacred                                | Wellman, William A.                   | William A. Wellman      | tt0029322 |
| 1746454502 | 1945 | 1945 | Crime, Inc.                                    | Crime, Inc.                                   | Landers, Lew                          | Lew Landers             | tt0037622 |
| 1746453631 | 1941 | 1941 | The Phantom Cowboy                             | The Phantom Cowboy                            | Sherman, George                       | George Sherman          | tt0034020 |
| 1746496092 | 1917 | 1917 | The Eyes of the World                          | The Eyes of the World                         | Crisp, Donald                         | Donald Crisp            | tt0007909 |
| 1746504008 | 1921 | 1921 | Room and Board                                 | Room and Board                                | Crosland, Alan                        | Alan Crosland           | tt0012635 |
| 1745358554 | 2009 | 2009 | The Ugly Truth                                 | The Ugly Truth                                | Luketic, Robert                       | Robert Luketic          | tt1142988 |
| 1745293645 | 2006 | 2006 | World Trade Center                             | World Trade Center                            | Stone, Oliver                         | Oliver Stone            | tt0469641 |
| 1746491784 | 1948 | 1948 | Half Past Midnight                             | Half Past Midnight                            | Claxton, William F.                   | William F. Claxton      | tt0040414 |
| 1746424558 | 1941 | 1941 | Roar of the Press                              | Roar of the Press                             | Rosen, Phil                           | Phil Rosen              | tt0034117 |
| 1746524804 | 1923 | 1923 | Danger Ahead                                   | Danger Ahead                                  | Howard, William K.                    | William K. Howard       | tt0013968 |
| 1746438964 | 1943 | 1943 | It Comes Up Love                               | It Comes Up Love                              | Lamont, Charles                       | Charles Lamont          | tt0036048 |
| 1746497063 | 1920 | 1920 | The Money-Changers                             | The Money Changers                            | Conway, Jack                          | Jack Conway             | tt0011475 |
| 1746436269 | 1997 | 1997 | Sick: The Life and Death of Bob Flanagan Super | Sick: The Life & Death of Bob Flanagan, Super | Dick, Kirby                           | Kirby Dick              | tt0120126 |
| 1745341633 | 2002 | 2002 | Windtalkers                                    | Windtalkers                                   | Woo, John                             | John Woo                | tt0245562 |
| 1769971975 | 1969 | 1969 | Erika/One                                      | Erika/One                                     | Denby, Jerry                          | Jerry Denby             | tt0217441 |
| 1746499944 | 1923 | 1923 | A Gentleman of Leisure                         | A Gentleman of Leisure                        | Henabery, Joseph                      | Joseph Henabery         | tt0131407 |
| 1746554280 | 1965 | 1965 | Mutiny in Outer Space                          | Mutiny in Outer Space                         | Grimaldi, Hugo                        | Hugo Grimaldi           | tt0059486 |
| 1745359637 | 2001 | 2000 | Citizen Toxie: The Toxic Avenger IV            | Citizen Toxie: The Toxic Avenger IV           | Kaufman, Lloyd                        | Lloyd Kaufman           | tt0212879 |
| 1745372325 | 2004 | 2004 | Fade to Black                                  | Fade to Black                                 | Paulson, Patrick ; Warren, Michael Jr | Patrick Paulson         | tt0428518 |
| 1745340292 | 2001 | 2001 | Planet of the Apes                             | Planet of the Apes                            | Burton, Tim                           | Tim Burton              | tt0133152 |
| 1746555348 | 1954 | 1954 | The Command                                    | The Command                                   | Butler, David                         | David Butler            | tt0046865 |
| 1746524281 | 1910 | 1910 | Renunciation                                   | Renunciation                                  |                                       | Wilbert Melville        | tt0339571 |

|            |      |      |                                    |                                    |                                |                     |           |
|------------|------|------|------------------------------------|------------------------------------|--------------------------------|---------------------|-----------|
| 1746514329 | 1923 | 1923 | The Enemies of Women               | Enemies of Women                   | Crosland, Alan                 | Alan Crosland       | tt0014021 |
| 1746502061 | 1923 | 1923 | The Meanest Man in the World       | The Meanest Man in the World       | Cline, Edward F.               | Edward F. Cline     | tt0014266 |
| 1746582243 | 1930 | 1930 | Hot Curves                         | Hot Curves                         | Taugo, Norman                  | Norman Taugo        | tt0020988 |
| 1745359937 | 2001 | 2001 | Freddy Got Fingered                | Freddy Got Fingered                | Green, Tom                     | Tom Green           | tt0240515 |
| 1746249452 | 1980 | 1980 | The Blues Brothers                 | The Blues Brothers                 | Landis, John                   | John Landis         | tt0080455 |
| 1746475736 | 1947 | 1947 | Little Miss Broadway               | Little Miss Broadway               | Dreifuss, Arthur               | Arthur Dreifuss     | tt0039571 |
| 1746474122 | 1948 | 1948 | Apartment for Peggy                | Apartment for Peggy                | Seaton, George                 | George Seaton       | tt0040104 |
| 1746504169 | 1917 | 1917 | The Voice of Conscience            | The Voice of Conscience            | Carewe, Edwin                  | Edwin Carewe        | tt0008741 |
| 1746577699 | 1935 | 1935 | Fighting Pilot                     | The Fighting Pilot                 | Mason, Noel                    | Noel M. Smith       | tt0026353 |
| 1746496983 | 1919 | 1919 | A Man's Country                    | A Man's Country                    | Kolker, Henry                  | Henry Kolker        | tt0010429 |
| 1746524704 | 1916 | 1916 | The Daring of Diana                | The Daring of Diana                | Drew, S. Rankin                | S. Rankin Drew      | tt0006566 |
| 1746583406 | 1951 | 1951 | Grounds for Marriage               | Grounds for Marriage               | Leonard, Robert Z.             | Robert Z. Leonard   | tt0042526 |
| 1746409506 | 1987 | 1987 | Death Wish 4: The Crackdown        | Death Wish 4: The Crackdown        | Thompson, J. Lee               | J. Lee Thompson     | tt0092857 |
| 1746464803 | 1941 | 1941 | Riders of the Purple Sage          | Riders of the Purple Sage          | Tinling, James                 | James Tinling       | tt0034104 |
| 1746525019 | 1920 | 1920 | The Sins of St. Anthony            | The Sins of St. Anthony            | Cruze, James                   | James Cruze         | tt0011697 |
| 1746582099 | 1910 | 1910 | In Old California                  | In Old California                  | Griffith, D. W.                | D.W. Griffith       | tt0001264 |
| 1745341799 | 2004 | 2004 | Blade: Trinity                     | Blade: Trinity                     | Goyer, David S.                | David S. Goyer      | tt0359013 |
| 1769976186 | 1920 | 1920 | The Cameraman                      | The Cameraman                      | Jones, Grover                  | Grover Jones        | tt0313851 |
| 1746573915 | 1963 | 1962 | Sodom and Gomorrah                 | Sodom and Gomorrah                 | Aldrich, Robert; Leone, Sergio | Robert Aldrich      | tt0056504 |
| 1746581543 | 1910 | 1910 | Her Father's Pride                 | Her Father's Pride                 | Griffith, D. W.                | D.W. Griffith       | tt0001243 |
| 1746272148 | 1968 | 1968 | The Private Navy of Sgt. O'Farrell | The Private Navy of Sgt. O'Farrell | Tashlin, Frank                 | Frank Tashlin       | tt0063459 |
| 1746422232 | 1996 | 1996 | Happy Gilmore                      | Happy Gilmore                      | Dugan, Dennis                  | Dennis Dugan        | tt0116483 |
| 1746524937 | 1923 | 1923 | Desert Rider                       | Desert Rider                       | Bradbury, Robert North         | Robert N. Bradbury  | tt0013984 |
| 1746453851 | 1941 | 1941 | That Uncertain Feeling             | That Uncertain Feeling             | Lubitsch, Ernst                | Ernst Lubitsch      | tt0034274 |
| 1746496115 | 1920 | 1920 | The Red Lane                       | The Red Lane                       | Reynolds, Lynn F.              | Lynn Reynolds       | tt0011616 |
| 1746504591 | 1921 | 1921 | Diamonds Adrift                    | Diamonds Adrift                    | Bennett, Chester               | Chester Bennett     | tt0322011 |
| 1746524936 | 1915 | 1915 | The Long Chance                    | The Long Chance                    | Le Saint, Edward J.            | Edward LeSaint      | tt0005648 |
| 1746423327 | 1999 | 1998 | Frogs for Snakes                   | Frogs for Snakes                   | Poe, Amos                      | Amos Poe            | tt0120680 |
| 1746583719 | 1929 | 1929 | Slim Fingers                       | Slim Fingers                       | Levigard, Josef                | Joseph Levigard     | tt0020418 |
| 1746574297 | 1958 | 1958 | She Gods of Shark Reef             | She Gods of Shark Reef             | Corman, Roger                  | Roger Corman        | tt0052188 |
| 1746436537 | 1942 | 1942 | Professor Creeps                   | Professor Creeps                   | Beaudine, William              | William Beaudine    | tt0035221 |
| 1746199984 | 1969 | 1968 | In the Year of the Pig             | In the Year of the Pig             | de Antonio, Emile              | Emile de Antonio    | tt0064482 |
| 1746496236 | 1920 | 1920 | Life                               | Life                               | Vale, Travers                  | Travers Vale        | tt0195880 |
| 1746503611 | 1921 | 1921 | Kazan                              | Kazan                              | Bracken, Bertram               | Bertram Bracken     | tt0012343 |
| 1746562387 | 1953 | 1953 | Destination Gobi                   | Destination Gobi                   | Wise, Robert                   | Robert Wise         | tt0045682 |
| 1746577895 | 1935 | 1935 | Hands Across the Table             | Hands Across the Table             | Leisen, Mitchell               | Mitchell Leisen     | tt0026452 |
| 1746570342 | 1934 | 1934 | The Mighty Barnum                  | The Mighty Barnum                  | Lang, Walter                   | Walter Lang         | tt0025501 |
| 1746434606 | 2000 | 2000 | George Washington                  | George Washington                  | Green, David Gordon            | David Gordon Green  | tt0262432 |
| 1745309448 | 2006 | 2005 | The Outsider                       | The Outsider                       | Jarecki, Nicholas              | Nicholas Jarecki    | tt0455989 |
| 1746520133 | 1923 | 1923 | Gossip                             | Gossip                             | Baggot, King                   | King Baggot         | tt0014095 |
| 1746422045 | 1982 | 1982 | The Soldier                        | The Soldier                        | Glickenhau, James              | James Glickenhau    | tt0084704 |
| 1746501294 | 1916 | 1916 | Peck O' Pickles                    | Peck o' Pickles                    | Heffron, T. N.                 | Thomas N. Heffron   | tt0163148 |
| 1746516261 | 1922 | 1922 | The Trap                           | The Trap                           | Thornby, Robert                | Robert Thornby      | tt0013704 |
| 1746513649 | 1923 | 1923 | The White Rose                     | The White Rose                     | Griffith, D. W.                | D.W. Griffith       | tt0014604 |
| 1746437380 | 1942 | 1942 | The Big Street                     | The Big Street                     | Reis, Irving                   | Irving Reis         | tt0034514 |
| 1746571532 | 1932 | 1932 | Uptown New York                    | Uptown New York                    | Schertzinger, Victor           | Victor Schertzinger | tt0023646 |
| 1746515061 | 1919 | 1919 | Why Smith Left Home                | Why Smith Left Home                | Crisp, Donald                  | Donald Crisp        | tt0010889 |
| 1746422645 | 1993 | 1993 | Striking Distance                  | Striking Distance                  | Herrington, Rowdy              | Rowdy Herrington    | tt0108238 |
| 1746583031 | 1939 | 1939 | Missing Daughters                  | Missing Daughters                  | Coleman, C. C.                 | Charles C. Coleman  | tt0031661 |
| 1746393671 | 1985 | 1985 | Marie                              | Maxie                              | Donaldson, Roger               | Paul Aaron          | tt0089569 |
| 1746235533 | 1973 | 1973 | Sweet Jesus, Preacherman           | Sweet Jesus, Preacherman           | Schellerup, Henning            | Henning Schellerup  | tt0167431 |
| 1746569682 | 1954 | 1954 | World for Ransom                   | World for Ransom                   | Aldrich, Robert                | Robert Aldrich      | tt0047681 |
| 1746466721 | 1917 | 1917 | The Phantom's Secret               | The Phantom's Secret               | Swickard, Charles              | Charles Swickard    | tt0008429 |
| 1746584462 | 1931 | 1931 | The Cuban Love Song                | The Cuban Love Song                | Van Dyke, W. S.                | W.S. Van Dyke       | tt0021772 |
| 1746577153 | 1960 | 1961 | Kipling's Women                    | Kipling's Women                    | Hudson, Fred; Smith, Harry     | Fred Hudson         | tt0142453 |
| 1746464951 | 1945 | 1945 | A Sporting Chance                  | A Sporting Chance                  | Blair, George                  | George Blair        | tt0038112 |
| 1746584672 | 1928 | 1928 | A Bit of Heaven                    | A Bit of Heaven                    | Wheeler, Cliff                 | Cliff Wheeler       | tt0018701 |



|            |      |      |                                 |                                 |                                              |                         |            |
|------------|------|------|---------------------------------|---------------------------------|----------------------------------------------|-------------------------|------------|
| 174655566  | 1954 | 1954 | Seven Brides for Seven Brothers | Seven Brides for Seven Brothers | Donen, Stanley                               | Stanley Donen           | tt0047472  |
| 1746577227 | 1963 | 1963 | 13 Frightened Girls             | 13 Frightened Girls             | Castle, William                              | William Castle          | tt0056796  |
| 1746576861 | 1932 | 1932 | Boiling Point                   | The Boiling Point               | Melford, George                              | George Melford          | tt0022702  |
| 1746508762 | 1925 | 1925 | His Master's Voice              | His Master's Voice              | Hoffman, Renaud                              | Renaud Hoffman          | tt0015917  |
| 1746582142 | 1928 | 1928 | A Woman's Way                   | A Woman's Way                   | Mortimer, Edmund                             | Edmund Mortimer         | tt0019592  |
| 1746419954 | 1993 | 1993 | Coneheads                       | Coneheads                       | Barron, Steve                                | Steve Barron            | tt0106598  |
| 1745359894 | 2009 | 2009 | My One and Only                 | My One and Only                 | Loncraine, Richard                           | Richard Loncraine       | tt1185431  |
| 1746423989 | 1941 | 1941 | Mutiny in the Arctic            | Mutiny in the Arctic            | Rawlins, John                                | John Rawlins            | tt0033930  |
| 1746501670 | 1910 | 1910 | A True Indian Brave             | A True Indian Brave             |                                              | Fred J. Balshofer       | tt1371151  |
| 1746217996 | 1967 | 1967 | Round Trip                      | Round Trip                      | Gaisseau, Pierre Dominique                   | Pierre                  | tt0257060  |
| 1746515560 | 1922 | 1922 | Thorobred                       | Thorobred                       | Halligan, George                             | George Halligan         | tt0170675  |
| 1746487594 | 1917 | 1917 | The Cold Deck                   | The Cold Deck                   | Hart, William S.                             | William S. Hart         | tt0007811  |
| 1746184683 | 1910 | 1910 | As the Bells Rang Out!          | As the Bells Rang Out!          | Griffith, D. W.                              | D.W. Griffith           | tt0001121  |
| 1746435220 | 1942 | 1942 | Careful Soft Shoulder           | Careful, Soft Shoulders         | Garrett, Oliver H. P.                        | Oliver H.P. Garrett     | tt0034579  |
| 1746520923 | 1949 | 1949 | Law of the Golden West          | Law of the Golden West          | Ford, Philip                                 | Philip Ford             | tt0041583  |
| 1746573883 | 1962 | 1962 | Geronimo                        | Geronimo                        | Laven, Arnold                                | Arnold Laven            | tt0056016  |
| 1746575028 | 1933 | 1933 | Trail Drive                     | The Trail Drive                 | James, Alan                                  | Alan James              | tt0025904  |
| 1746524601 | 1916 | 1916 | The Closed Road                 | The Closed Road                 | Tourneur, Maurice                            | Maurice Tourneur        | tt0006519  |
| 1746581292 | 1910 | 1910 | The Legend of Scar-Face         | The Legend of Scar Face         |                                              | Keanu Buel              | tt2012074  |
| 1746185864 | 1966 | 1966 | Dimension 5                     | Dimension 5                     | Adreon, Franklin                             | Franklin Adreon         | tt0060311  |
| 1746233031 | 1967 | 1967 | Hillbillies in a Haunted House  | Hillbillies in a Haunted House  | Yarbrough, Jean                              | Jean Yarbrough          | tt0061765  |
| 1746576950 | 1961 | 1961 | Pirates of Tortuga              | Pirates of Tortuga              | Webb, Robert D.                              | Robert D. Webb          | tt0055302  |
| 1746570383 | 1934 | 1934 | Ever Since Eve                  | Ever Since Eve                  | Marshall, George; St. Clair, Malcolm         | George Marshall         | tt0025093  |
| 1746545174 | 1940 | 1940 | Bowery Boy                      | Bowery Boy                      | Morgan, William                              | William Morgan          | tt0033429  |
| 1746582863 | 1937 | 1937 | Between Two Women               | Between Two Women               | Seitz, George B.                             | George B. Seitz         | tt0028623  |
| 1746503504 | 1919 | 1919 | Shadows of Suspicion            | Shadows of Suspicion            | Carewe, Edwin                                | Edwin Carewe            | tt0010687  |
| 1746454184 | 2000 | 2000 | Down from the Mountain          | Down from the Mountain          | Doob, Nick; Hegedus, Chris; Pennebaker, Nick | Nick Doob               | tt0284067  |
| 1746574511 | 1933 | 1933 | Midshipman Jack                 | Midshipman Jack                 | Cabanne, Christy                             | Christy Cabanne         | tt0024336  |
| 1746578541 | 1962 | 1962 | Sweet Bird of Youth             | Sweet Bird of Youth             | Brooks, Richard                              | Richard Brooks          | tt0056541  |
| 1746583644 | 1931 | 1931 | Tarnished Lady                  | Tarnished Lady                  | Cukor, George                                | George Cukor            | tt0022463  |
| 1746585323 | 1928 | 1928 | The Butter and Egg Man          | The Butter and Egg Man          | Wallace, Richard                             | Richard Wallace         | tt0018736  |
| 1746509047 | 1925 | 1925 | The Half-Way Girl               | The Half Way Girl               | Dillon, John Francis                         | John Francis Dillon     | tt0015889  |
| 1746249033 | 1980 | 1980 | Inside Moves                    | Inside Moves                    | Donner, Richard                              | Richard Donner          | tt0080928  |
| 1746422238 | 1999 | 1999 | Baby Geniuses                   | Baby Geniuses                   | Clark, Bob                                   | Bob Clark               | tt0118665  |
| 1746574787 | 1936 | 1936 | Wildcat Saunders                | Wildcat Saunders                | Fraser, Harry                                | Harry L. Fraser         | tt0028507  |
| 1746574048 | 1956 | 1956 | Three for Jamie Dawn            | Three for Jamie Dawn            | Carr, Thomas                                 | Thomas Carr             | tt0049850  |
| 1746503037 | 1917 | 1917 | The Slacker's Heart             | The Slacker's Heart             | Ireland, Frederick J.                        | Frederick J. Ireland    | tt0008589  |
| 1746577942 | 1935 | 1935 | Roaring Roads                   | Roaring Roads                   | Roberts, C. Edward; Nazarro, Raymond         | Ray Nazarro             | tt0136492  |
| 1746208287 | 1969 | 1969 | Sam Whiskey                     | Sam Whiskey                     | Laven, Arnold                                | Arnold Laven            | tt0064923  |
| 1746577916 | 1938 | 1938 | This Marriage Business          | This Marriage Business          | Cabanne, Christy                             | Christy Cabanne         | tt0030862  |
| 1746456084 | 1996 | 1996 | 2 Days in the Valley            | 2 Days in the Valley            | Herzfeld, John                               | John Herzfeld           | tt0115438  |
| 1746562164 | 1954 | 1954 | The Immortal City               | The Immortal City               | Cappi, Jerome                                | Jerome Cappi            | tt0459406  |
| 1746566064 | 1953 | 1953 | Column South                    | Column South                    | Cordova, Frederick de                        | Frederick De Cordova    | tt0045637  |
| 1745293903 | 2006 | 2006 | Shut Up & Sing                  | Shut Up & Sing                  | Kopple, Barbara; Peck, Cecilia               | Barbara Kopple          | tt0811136  |
| 1746423459 | 1996 | 1996 | Bogus                           | Bogus                           | Jewison, Norman                              | Norman Jewison          | tt0115725  |
| 1745302666 | 2006 | 2005 | Lassie                          | Lassie                          | Sturridge, Charles                           | Charles Sturridge       | tt0431213  |
| 1746454266 | 1998 | 1998 | Knock Off                       | Knock Off                       | Hark, Tsui                                   | Hark Tsui               | tt0120724  |
| 1746394547 | 1985 | 1985 | D.A.R.Y.L.                      | D.A.R.Y.L.                      | Wincer, Simon                                | Simon Wincer            | tt0088979  |
| 1746435900 | 1998 | 1998 | Rounders                        | Rounders                        | Dahl, John                                   | John Dahl               | tt0128442  |
| 1745359506 | 2003 | 2003 | Dysfunktional Family            | Dysfunktional Family            | Gallo, George                                | George Gallo            | tt00337996 |
| 1746503688 | 1918 | 1918 | And the Children Pay            | And the Children Pay            | Tyrol, Jacques                               | Jacques Tyrol           | tt0181293  |
| 1745342677 | 2010 | 2009 | Best Worst Movie                | Best Worst Movie                | Stephenson, Michael Paul                     | Michael Paul Stephenson | tt1144539  |
| 1746503057 | 1914 | 1914 | The County Chairman             | The County Chairman             |                                              | Allan Dwan              | tt0003799  |
| 1746585163 | 1929 | 1929 | Sunnyside Up                    | Sunnyside Up                    | Butler, David                                | David Butler            | tt0020466  |
| 1746496545 | 1919 | 1919 | Oh, You Women                   | Oh, You Women!                  | Emerson, John                                | John Emerson            | tt0010518  |
| 1746582609 | 1937 | 1937 | Dangerous Number                | Dangerous Number                | Thorpe, Richard                              | Richard Thorpe          | tt0028764  |
| 1746578877 | 1962 | 1962 | Follow That Dream               | Follow That Dream               | Douglas, Gordon                              | Gordon Douglas          | tt0055992  |

|            |      |      |                                    |                                    |                                 |                       |           |
|------------|------|------|------------------------------------|------------------------------------|---------------------------------|-----------------------|-----------|
| 1746520650 | 1926 | 1926 | Danger Ahead                       | Danger Ahead                       | Pembroke, Perc                  | Scott Pembroke        | tt0251037 |
| 1746574607 | 1933 | 1933 | Midnight Club                      | Midnight Club                      | Hall, Alexander; Somnes, George | Alexander Hall        | tt0024333 |
| 1746208508 | 1969 | 1969 | The Illustrated Man                | The Illustrated Man                | Smight, Jack                    | Jack Smight           | tt0064473 |
| 1769970849 | 1915 | 1915 | No Smoking                         | No Smoking                         | Metcalfe, Earl                  |                       | tt0844735 |
| 1746533042 | 1914 | 1914 | Soldiers of Fortune                | Soldiers of Fortune                | Haddock, William F.             | William F. Haddock    | tt0004613 |
| 1746182446 | 1910 | 1910 | The Broken Oath                    | The Broken Oath                    |                                 | Harry Solter          | tt0200505 |
| 1746578681 | 1959 | 1959 | Career                             | Career                             | Anthony, Joseph                 | Joseph Anthony        | tt0052673 |
| 1746542696 | 1926 | 1926 | Queen o' Diamonds                  | Queen o' Diamonds                  | Withey, Chet                    | Chester Withey        | tt0017301 |
| 1746514641 | 1915 | 1915 | The Carpet from Bagdad             | The Carpet from Bagdad             | Campbell, Colin                 | Colin Campbell        | tt0005062 |
| 1746578804 | 1951 | 1951 | Go for Broke!                      | Go for Broke!                      | Pirosh, Robert                  | Robert Pirosh         | tt0043590 |
| 1746248844 | 1980 | 1980 | Roadie                             | Roadie                             | Rudolph, Alan                   | Alan Rudolph          | tt0081433 |
| 1746257252 | 1979 | 1979 | Norma Rae                          | Norma Rae                          | Ritt, Martin                    | Martin Ritt           | tt0079638 |
| 1746437973 | 1940 | 1940 | South to Karanga                   | South to Karanga                   | Schuster, Harold                | Harold D. Schuster    | tt0033085 |
| 1746532726 | 1914 | 1914 | The Little Gray Lady               | The Little Gray Lady               | Powers, Francis                 | Francis Powers        | tt0004236 |
| 1746585098 | 1930 | 1930 | Prince of Diamonds                 | Prince of Diamonds                 | Brown, Karl; Van Buren, A. H.   | Karl Brown            | tt0021271 |
| 1745341572 | 2009 | 2009 | The Soloist                        | The Soloist                        | Wright, Joe                     | Joe Wright            | tt0821642 |
| 1746583135 | 1936 | 1936 | Oh, Susanna!                       | Oh, Susanna!                       | Kane, Joseph                    | Joseph Kane           | tt0029334 |
| 1746584996 | 1939 | 1939 | Charlie Chan at Treasure Island    | Charlie Chan at Treasure Island    | Foster, Norman                  | Norman Foster         | tt0031147 |
| 1746508202 | 1926 | 1926 | The Bells                          | The Bells                          | Young, James                    | James Young           | tt0016640 |
| 1745340017 | 2002 | 2002 | Blade II                           | Blade II                           | del Toro, Guillermo             | Guillermo del Toro    | tt0187738 |
| 1746500136 | 1925 | 1925 | Lilies of the Streets              | Lilies of the Streets              | Levering, Joseph                | Joseph Levering       | tt0016024 |
| 1746483472 | 1917 | 1917 | Over There                         | Over There                         | Kirkwood, James                 | James Kirkwood        | tt0181747 |
| 1746453719 | 1995 | 1995 | Empire Records                     | Empire Records                     | Moyle, Allan                    | Allan Moyle           | tt0112950 |
| 1746498289 | 1922 | 1922 | The Lane That Had No Turning       | The Lane That Had No Turning       | Fleming, Victor                 | Victor Fleming        | tt0013303 |
| 1746408905 | 1989 | 1989 | Indiana Jones and the Last Crusade | Indiana Jones and the Last Crusade | Spielberg, Steven               | Steven Spielberg      | tt0097576 |
| 1746567776 | 1933 | 1933 | The Kennel Murder Case             | The Kennel Murder Case             | Curtiz, Michael                 | Michael Curtiz        | tt0024210 |
| 1746491734 | 1946 | 1946 | Fear                               | Fear                               | Zeisler, Alfred                 | Alfred Zeisler        | tt0038524 |
| 1769970778 | 1912 | 1912 | Just Like a Woman                  | Just Like a Woman                  |                                 | D.W. Griffith         | tt0002287 |
| 1746583483 | 1929 | 1929 | The Lady Lies                      | The Lady Lies                      | Henley, Hobart                  | Hobart Henley         | tt0020072 |
| 1746511793 | 1916 | 1916 | The Quest of Life                  | The Quest of Life                  | Miller, Ashley                  | Ashley Miller         | tt0158877 |
| 1746578988 | 1962 | 1962 | Eegah!                             | Eegah                              | Merriwether, Nicholas           | Arch Hall Sr.         | tt0055946 |
| 1746574042 | 1956 | 1956 | Lust for Life                      | Lust for Life                      | Minnelli, Vincente              | Vincente Minnelli     | tt0049456 |
| 1746455744 | 1995 | 1995 | Clockers                           | Clockers                           | Lee, Spike                      | Spike Lee             | tt0112688 |
| 1746513041 | 1916 | 1916 | Seventeen                          | Seventeen                          | Vignola, Robert G.              | Robert G. Vignola     | tt0007326 |
| 1746583464 | 1951 | 1951 | When Worlds Collide                | When Worlds Collide                | Maté, Rudolph                   | Rudolph Maté          | tt0044207 |
| 1746465124 | 1945 | 1945 | Molly and Me                       | Molly and Me                       | Seiler, Lewis                   | Lewis Seiler          | tt0037923 |
| 1746218885 | 1972 | 1972 | Cool Breeze                        | Cool Breeze                        | Pollack, Barry                  | Barry Pollack         | tt0068409 |
| 1746464961 | 1941 | 1941 | Never Give a Sucker an Even Break  | Never Give a Sucker an Even Break  | Cline, Edward                   | Edward F. Cline       | tt0033945 |
| 1746571783 | 1931 | 1931 | Annabelle's Affairs                | Annabelle's Affairs                | Werker, Alfred                  | Alfred L. Werker      | tt0021610 |
| 1746520310 | 1925 | 1925 | That Devil Quemado                 | That Devil Quemado                 | Andrews, Del                    | Del Andrews           | tt0169310 |
| 1746494240 | 1910 | 1910 | Two Little Waifs                   | Two Little Waifs                   | Griffith, D. W.                 | D.W. Griffith         | tt0001430 |
| 1746453847 | 1941 | 1941 | Moon Over Miami                    | Moon Over Miami                    | Lang, Walter                    | Walter Lang           | tt0033918 |
| 1746419570 | 1986 | 1986 | Quiet Cool                         | Quiet Cool                         | Borris, Clay                    | Clay Borris           | tt0091815 |
| 1746504188 | 1917 | 1917 | A Bit O' Heaven                    | A Bit o' Heaven                    | Warrenton, Lule                 | Lule Warrenton        | tt0168513 |
| 1746465039 | 1944 | 1944 | The Old Texas Trail                | The Old Texas Trail                | Collins, Lewis D.               | Lewis D. Collins      | tt0037148 |
| 1746410001 | 1984 | 1984 | Sixteen Candles                    | Sixteen Candles                    | Hughes, John                    | John Hughes           | tt0088128 |
| 1746581642 | 1928 | 1929 | The Saddle King                    | The Saddle King                    | Wilson, Benjamin Franklin       | Ben F. Wilson         | tt0159718 |
| 1746566346 | 1958 | 1958 | Darby's Rangers                    | Darby's Rangers                    | Wellman, William A.             | William A. Wellman    | tt0051519 |
| 1746500082 | 1945 | 1945 | Santa Fe Saddlemates               | Santa Fe Saddlemates               | Carr, Thomas                    | Thomas Carr           | tt0038050 |
| 1746574852 | 1936 | 1936 | Border Caballero                   | Border Caballero                   | Newfield, Sam                   | Sam Newfield          | tt0027382 |
| 1745372702 | 2003 | 2003 | Kangaroo Jack                      | Kangaroo Jack                      | McNally, David                  | David McNally         | tt0257568 |
| 1746580732 | 1938 | 1938 | The Colorado Trail                 | The Colorado Trail                 | Nelson, Sam                     | Sam Nelson            | tt0030003 |
| 1746515302 | 1918 | 1918 | Human Clay                         | Human Clay                         | Physioc, Wray                   | Wray Bartlett Physioc | tt0184594 |
| 1746577541 | 1938 | 1939 | Birthright                         | Birthright                         | Micheaux, Oscar                 | Oscar Micheaux        | tt0135163 |
| 1746438327 | 1945 | 1945 | The Daltons Ride Again             | The Daltons Ride Again             | Taylor, Ray                     | Ray Taylor            | tt0037628 |
| 1746235043 | 1971 | 1971 | Women in Cages                     | Women in Cages                     | De Leon, Gerry                  | Gerardo de Leon       | tt0067995 |
| 1746520956 | 1949 | 1948 | Highway 13                         | Highway 13                         | Berke, William                  | William Berke         | tt0040437 |

|            |      |      |                                         |                                           |                                    |                      |           |
|------------|------|------|-----------------------------------------|-------------------------------------------|------------------------------------|----------------------|-----------|
| 1746436051 | 1940 | 1940 | Little Nellie Kelly                     | Little Nellie Kelly                       | Taugrog, Norman                    | Norman Taugrog       | tt0032718 |
| 1746410663 | 1986 | 1986 | Soul Man                                | Soul Man                                  | Miner, Steve                       | Steve Miner          | tt0091991 |
| 1746436702 | 1943 | 1943 | The Heat's On                           | The Heat's On                             | Ratoff, Gregory                    | Gregory Ratoff       | tt0035978 |
| 1746408654 | 1984 | 1984 | Star Trek III: The Search for Spock     | Star Trek III: The Search for Spock       | Nimoy, Leonard                     | Leonard Nimoy        | tt0088170 |
| 1746394160 | 1992 | 1992 | Husbands and Wives                      | Husbands and Wives                        | Allen, Woody                       | Woody Allen          | tt0104466 |
| 1746582678 | 1935 | 1935 | Remember Last Night?                    | Remember Last Night?                      | Whale, James                       | James Whale          | tt0026921 |
| 1746473686 | 1942 | 1942 | Billy the Kid Trapped                   | Billy the Kid Trapped                     | Scott, Sherman                     | Sam Newfield         | tt0033390 |
| 1746566330 | 1956 | 1956 | 1984                                    | 1984                                      | Anderson, Michael                  | Michael Anderson     | tt0048918 |
| 1746583538 | 1928 | 1928 | Annapolis                               | Annapolis                                 | Cabanne, Christy                   | Christy Cabanne      | tt0018646 |
| 1745293656 | 2006 | 2006 | Children of Men                         | Children of Men                           | Cuarón, Alfonso                    | Alfonso Cuarón       | tt0206634 |
| 1746584090 | 1940 | 1940 | Girls of the Road                       | Girls of the Road                         | Grinde, Nick                       | Nick Grinde          | tt0032530 |
| 1746410867 | 1991 | 1991 | Bugsy                                   | Bugsy                                     | Levinson, Barry                    | Barry Levinson       | tt0101516 |
| 1746420793 | 1981 | 1981 | Dead & Buried                           | Dead & Buried                             | Sherman, Gary A.                   | Gary Sherman         | tt0082242 |
| 1746437923 | 1945 | 1945 | Girls of the Big House                  | Girls of the Big House                    | Archainbaud, George                | George Archainbaud   | tt0037742 |
| 1746454637 | 1942 | 1942 | Almost Married                          | Almost Married                            | Lamont, Charles                    | Charles Lamont       | tt0034451 |
| 1746585128 | 1928 | 1928 | Happiness Ahead                         | Happiness Ahead                           | Seiter, William A.                 | William A. Seiter    | tt0018974 |
| 1769969985 | 1912 | 1912 | The Female of the Species               | The Female of the Species                 | Griffith, D. W.                    | D. W. Griffith       | tt0002176 |
| 1746492203 | 1946 | 1946 | Frontier Gun Law                        | Frontier Gunlaw                           | Abrahams, Derwin                   | Derwin Abrahams      | tt0038538 |
| 1746582392 | 1928 | 1928 | Gypsy of the North                      | Gypsy of the North                        | Pembroke, Scott                    | Scott Pembroke       | tt0018969 |
| 1746508736 | 1926 | 1926 | Beverly of Graustark                    | Beverly of Graustark                      | Franklin, Sidney                   | Sidney Franklin      | tt0016646 |
| 1746580796 | 1939 | 1939 | Lucky Night                             | Lucky Night                               | Taugrog, Norman                    | Norman Taugrog       | tt0031595 |
| 1746530701 | 1948 | 1948 | El Dorado Pass                          | El Dorado Pass                            | Nazarro, Ray                       | Ray Nazarro          | tt0041331 |
| 1746553649 | 1964 | 1964 | Dead Ringer                             | Dead Ringer                               | Henreid, Paul                      | Paul Henreid         | tt0057997 |
| 1746513192 | 1923 | 1923 | Cameo Kirby                             | Cameo Kirby                               | Ford, John                         | John Ford            | tt0013909 |
| 1746514708 | 1910 | 1910 | Red Girl's Romance                      | Red Girl's Romance                        |                                    | Fred J. Balshofer    | tt1390977 |
| 1746573722 | 1932 | 1932 | Two Seconds                             | Two Seconds                               | LeRoy, Mervyn                      | Mervyn LeRoy         | tt0023629 |
| 1746503352 | 1921 | 1921 | Get-Rich-Quick Wallingford              | Get Rich Quick Wallingford                | Borzage, Frank                     | Frank Borzage        | tt0012209 |
| 1746584436 | 1929 | 1929 | The Wild Party                          | The Wild Party                            | Arzner, Dorothy                    | Dorothy Arzner       | tt0020590 |
| 1746502461 | 1914 | 1914 | The Squaw Man                           | The Squaw Man                             | Apfel, Oscar C.; DeMille, Cecil B. | Oscar Apfel          | tt0004635 |
| 1746566292 | 1958 | 1958 | Cowboy                                  | Cowboy                                    | Daves, Delmer                      | Delmer Daves         | tt0051496 |
| 1746574050 | 1960 | 1960 | Sunrise at Campobello                   | Sunrise at Campobello                     | Donehue, Vincent J.                | Vincent J. Donehue   | tt0054354 |
| 1769976709 | 1929 | 1929 | Hot Lemonade                            | Hot Lemonade                              | Gillstrom, Arvid E.                | Arvid E. Gillstrom   | tt0254390 |
| 1746487749 | 1918 | 1918 | The Light of Western Stars              | The Light of Western Stars                | Swickard, Charles                  | Charles Swickard     | tt0009301 |
| 1746550224 | 1954 | 1954 | There's No Business Like Show Business  | There's No Business Like Show Business    | Lang, Walter                       | Walter Lang          | tt0047574 |
| 1746454278 | 1942 | 1942 | Obliging Young Lady                     | Obliging Young Lady                       | Wallace, Richard                   | Richard Wallace      | tt0033968 |
| 1746568351 | 1952 | 1952 | Barbed Wire                             | Barbed Wire                               | Archainbaud, George                | George Archainbaud   | tt0044396 |
| 1746532457 | 1927 | 1927 | The Enchanted Island                    | The Enchanted Island                      | Crosby, William G.                 | William G. Crosby    | tt0017849 |
| 1746487148 | 1920 | 1920 | The Blue Pearl                          | The Blue Pearl                            | Irving, George                     | George Irving        | tt0011006 |
| 1746569635 | 1955 | 1955 | Broadway Jungle                         | Broadway Jungle                           | Tucker, Phil                       | Phil Tucker          | tt0047900 |
| 1746584943 | 1939 | 1939 | Pardon Our Nerve                        | Pardon Our Nerve                          | Humberstone, H. Bruce              | H. Bruce Humberstone | tt0031785 |
| 1746465320 | 1947 | 1947 | Living in a Big Way                     | Living in a Big Way                       | La Cava, Gregory                   | Gregory La Cava      | tt0039574 |
| 1746464930 | 1947 | 1947 | Second Chance                           | Second Chance                             | Tinling, James S.                  | James Tinling        | tt0039807 |
| 1746569563 | 1953 | 1953 | Shoot First                             | Shoot First                               | Parrish, Robert                    | Robert Parrish       | tt0046307 |
| 1746520906 | 1950 | 1950 | Abbott & Costello in the Foreign Legion | Abbott and Costello in the Foreign Legion | Lamont, Charles                    | Charles Lamont       | tt0042179 |
| 1746566162 | 1954 | 1954 | Riding Shotgun                          | Riding Shotgun                            | DeToth, Andre                      | André De Toth        | tt0047413 |
| 1746524438 | 1923 | 1923 | The Dangerous Maid                      | The Dangerous Maid                        | Heerman, Victor                    | Victor Heerman       | tt0013971 |
| 1746574979 | 1938 | 1937 | Clipped Wings                           | Clipped Wings                             | Paton, Stuart                      | Stuart Paton         | tt0028725 |
| 1746585155 | 1928 | 1928 | The Battle of the Sexes                 | The Battle of the Sexes                   |                                    | D. W. Griffith       | tt0018678 |
| 1746492094 | 1945 | 1945 | Sing Me a Song of Texas                 | Sing Me a Song of Texas                   |                                    | Vernon Keays         | tt0038090 |
| 1746260935 | 1980 | 1980 | Fatso                                   | Fatso                                     | Keays, Vernon                      | Vernon Keays         | tt0080724 |
| 1746520549 | 1926 | 1926 | Two Can Play                            | Two Can Play                              | Bancroft, Anne                     | Anne Bancroft        | tt0017494 |
| 1746454399 | 1941 | 1941 | Virginia                                | Virginia                                  | Ross, Nat                          | Nat Ross             | tt0034364 |
| 1746553968 | 1964 | 1964 | Bunny Yeager's Nude Las Vegas           | Bunny Yeager's Nude Las Vegas             | Griffith, Edward H.                | Edward H. Griffith   | tt0157429 |
| 1746198232 | 1969 | 1970 | The Curious Female                      | The Curious Female                        | Mahon, Barry                       | Barry Mahon          | tt0123770 |
| 1746409286 | 1987 | 1987 | Roxanne                                 | Roxanne                                   | Rapp, Paul                         | Paul Rapp            | tt0093886 |
| 1746454499 | 1941 | 1941 | Manpower                                | Manpower                                  | Schepisi, Fred                     | Fred Schepisi        | tt0035034 |
| 1746583806 | 1929 | 1929 | The Little Savage                       | The Little Savage                         | Walsh, Raoul                       | Raoul Walsh          | tt0331557 |

|            |      |      |                                           |                                           |                        |                       |           |
|------------|------|------|-------------------------------------------|-------------------------------------------|------------------------|-----------------------|-----------|
| 1746454155 | 1995 | 1995 | Gold Diggers: The Secret of Bear Mountain | Gold Diggers: The Secret of Bear Mountain | Dobson, Kevin James    | Kevin James Dobson    | tt0113188 |
| 1746509419 | 1924 | 1924 | On Time                                   | On Time                                   | Lehrman, Henry         | Henry Lehrman         | tt0015191 |
| 1746438591 | 1996 | 1996 | Striptease                                | Striptease                                | Bergman, Andrew        | Andrew Bergman        | tt0117765 |
| 1746500134 | 1946 | 1946 | Bad Bascomb                               | Bad Bascomb                               | Simon, S. Sylvan       | S. Sylvan Simon       | tt0038319 |
| 1746508757 | 1924 | 1923 | Black Oxen                                | Black Oxen                                | Lloyd, Frank           | Frank Lloyd           | tt0014721 |
| 1745357697 | 2010 | 2010 | Sex and the City 2                        | Sex and the City 2                        | King, Michael Patrick  | Michael Patrick King  | tt1261945 |
| 1746455147 | 1994 | 1994 | Safe Passage                              | Safe Passage                              | Ackerman, Robert Allan | Robert Allan Ackerman | tt0111054 |
| 1746560616 | 1932 | 1932 | Forbidden Company                         | Forbidden Company                         | Thorpe, Richard        | Richard Thorpe        | tt0022906 |
| 1746516258 | 1919 | 1919 | Here Comes the Bride                      | Here Comes the Bride                      | Robertson, John S.     | John S. Robertson     | tt0010244 |
| 1746464998 | 1944 | 1943 | A Guy Named Joe                           | A Guy Named Joe                           | Fleming, Victor        | Victor Fleming        | tt0035959 |
| 1746422513 | 1998 | 1998 | Mercury Rising                            | Mercury Rising                            | Becker, Harold         | Harold Becker         | tt0120749 |
| 1746584302 | 1935 | 1935 | Death from a Distance                     | Death from a Distance                     | Strayer, Frank R.      | Frank R. Strayer      | tt0027504 |
| 1746183155 | 1910 | 1910 | The Blind Man's Tact                      | The Blind Man's Tact                      |                        | Harry Solter          | tt0200495 |
| 1746496872 | 1917 | 1917 | The Door Between                          | The Door Between                          | Julian, Rupert         | Rupert Julian         | tt0007868 |
| 1746571073 | 1935 | 1935 | One Frightened Night                      | One Frightened Night                      | Cabanne, Christy       | Christy Cabanne       | tt0026819 |
| 1746569646 | 1954 | 1954 | The Gambler from Natchez                  | The Gambler from Natchez                  | Levin, Henry           | Henry Levin           | tt0047011 |
| 1745357724 | 2001 | 2001 | Not Another Teen Movie                    | Not Another Teen Movie                    | Gallen, Joel           | Joel Gallen           | tt0277371 |
| 1746409064 | 1990 | 1990 | Heart Condition                           | Heart Condition                           | Parriott, James D.     | James D. Parriott     | tt0099750 |
| 1746438725 | 1998 | 1998 | Billy's Hollywood Screen Kiss             | Billy's Hollywood Screen Kiss             | O'Haver, Tommy         | Tommy O'Haver         | tt0137386 |
| 1746248809 | 1979 | 1979 | Skatetown U.S.A.                          | Skatetown, U.S.A.                         | Levey, William A.      | William A. Levey      | tt0079912 |
| 1746577920 | 1934 | 1934 | The Crosby Case                           | The Crosby Case                           | Marin, Edward L.       | Edwin L. Marin        | tt0025014 |
| 1746516111 | 1921 | 1921 | The Cave Girl                             | The Cave Girl                             | Franz, Joseph J.       | Joseph Franz          | tt0012034 |
| 1746216770 | 1967 | 1967 | Don't Look Back                           | Dont Look Back                            | Pennebaker, D. A.      | D.A. Pennebaker       | tt0061589 |
| 1746565054 | 1952 | 1952 | Wagon Team                                | Wagon Team                                | Archainbaud, George    | George Archainbaud    | tt0045305 |
| 1746578928 | 1951 | 1951 | Pier 23                                   | Pier 23                                   | Berke, William         | William Berke         | tt0043920 |
| 1745303063 | 2005 | 2005 | Waiting ...                               | Waiting...                                | McKittrick, Rob        | Rob McKittrick        | tt0348333 |
| 1746573647 | 1932 | 1932 | Bachelor's Affairs                        | Bachelor's Affairs                        | Werker, Alfred         | Alfred L. Werker      | tt0022649 |
| 1746453930 | 1995 | 1995 | The Perez Family                          | The Perez Family                          | Nair, Mira             | Mira Nair             | tt0114113 |
| 1746424382 | 1942 | 1942 | The Mayor of 44th Street                  | The Mayor of 44th Street                  | Green, Alfred E.       | Alfred E. Green       | tt0035048 |
| 1746198180 | 1966 | 1966 | Johnny Tiger                              | Johnny Tiger                              | Wendkos, Paul          | Paul Wendkos          | tt0060565 |
| 1746579021 | 1951 | 1951 | Blazing Bullets                           | Blazing Bullets                           | Fox, Wallace W.        | Wallace Fox           | tt0043348 |
| 1746580414 | 1938 | 1938 | Sweethearts                               | Sweethearts                               | Van Dyke, W. S.        | W.S. Van Dyke         | tt0030817 |
| 1746435419 | 1995 | 1995 | Major Payne                               | Major Payne                               | Castle, Nick           | Nick Castle           | tt0110443 |
| 1746573863 | 1958 | 1958 | The Screaming Skull                       | The Screaming Skull                       | Nicol, Alex            | Alex Nicol            | tt0052169 |
| 1746473922 | 1945 | 1945 | Club Havana                               | Club Havana                               | Ulmer, Edgar G.        | Edgar G. Ulmer        | tt0037605 |
| 1746580816 | 1936 | 1936 | Three Men on a Horse                      | Three Men on a Horse                      | LeRoy, Mervyn          | Mervyn LeRoy          | tt0028371 |
| 1746520609 | 1925 | 1925 | Fighting Youth                            | Fighting Youth                            | Eason, Reeves          | B. Reeves Eason       | tt0015815 |
| 1745271798 | 2000 | 2000 | Pitch Black                               | Pitch Black                               | Twohy, David           | David Twohy           | tt0134847 |
| 1746573208 | 1931 | 1931 | Up Pops the Devil                         | Up Pops the Devil                         | Sutherland, A. Edward  | A. Edward Sutherland  | tt0022525 |
| 1746578693 | 1962 | 1962 | The Legend of Lobo                        | The Legend of Lobo                        | Algar, James           |                       | tt0056173 |
| 1746233280 | 1966 | 1966 | The Trouble With Angels                   | The Trouble with Angels                   | Lupino, Ida            | Ida Lupino            | tt0061122 |
| 1746423576 | 1995 | 1995 | Sense and Sensibility                     | Sense and Sensibility                     | Lee, Ang               | Ang Lee               | tt0114388 |
| 1746504140 | 1921 | 1921 | Bits of Life                              | Bits of Life                              | Neilan, Marshall       | James Flood           | tt0011972 |
| 1746567819 | 1952 | 1952 | The Thief                                 | The Thief                                 | Rouse, Russell         | Russell Rouse         | tt0045230 |
| 1746509238 | 1925 | 1925 | Rose of the World                         | Rose of the World                         | Beaumont, Harry        | Harry Beaumont        | tt0016299 |
| 1746269693 | 1980 | 1980 | Little Darlings                           | Little Darlings                           | Maxwell, Ronald F.     | Ron Maxwell           | tt0081060 |
| 1746584023 | 1936 | 1936 | Timothy's Quest                           | Timothy's Quest                           | Barton, Charles        | Charles Barton        | tt0028384 |
| 1746520209 | 1926 | 1926 | The Dixie Flyer                           | The Dixie Flyer                           | Hunt, Charles J.       | Charles J. Hunt       | tt0126265 |
| 1746514325 | 1923 | 1923 | Chastity                                  | Chastity                                  | Schertzinger, Victor   | Victor Schertzinger   | tt0013919 |
| 1746569924 | 1959 | 1959 | Happy Anniversary                         | Happy Anniversary                         | Miller, David          | David Miller          | tt0052878 |
| 1746520308 | 1925 | 1925 | Straight Through                          | Straight Through                          | Rosson, Arthur         | Arthur Rosson         | tt0016402 |
| 1746500449 | 1926 | 1925 | The Train Wreckers                        | The Train Wreckers                        | McGowan, J. P.         | J.P. McGowan          | tt0016450 |
| 1746580669 | 1938 | 1938 | Knight of the Plains                      | Knight of the Plains                      | Newfield, Sam          | Sam Newfield          | tt0030329 |
| 1746453620 | 1943 | 1943 | Gals, Incorporated                        | Gals, Incorporated                        | Goodwins, Leslie       | Leslie Goodwins       | tt0035915 |
| 1769970620 | 1968 | 1968 | The Sex Shuffle                           | The Sex Shuffle                           | Scott, Ron             | Ron Scott             | tt0257149 |
| 1746574590 | 1937 | 1937 | Expensive Husbands                        | Expensive Husbands                        | Connolly, Bobby        | Bobby Connolly        | tt0030111 |
| 1746211467 | 1973 | 1973 | Breezy                                    | Breezy                                    | Eastwood, Clint        | Clint Eastwood        | tt0069822 |

|            |      |      |                               |                               |                                      |                       |           |
|------------|------|------|-------------------------------|-------------------------------|--------------------------------------|-----------------------|-----------|
| 1745309510 | 2007 | 2006 | Air Guitar Nation             | Air Guitar Nation             | Lipsitz, Alexandra                   | Alexandra Lipsitz     | tt0799915 |
| 1746532849 | 1928 | 1928 | Land of the Silver Fox        | Land of the Silver Fox        | Enright, Ray                         | Ray Enright           | tt0019070 |
| 1746585333 | 1928 | 1929 | Headin' Westward              | Headin' Westward              | McGowan, J. P.                       | J.P. McGowan          | tt0019970 |
| 1746566077 | 1953 | 1953 | Tropic Zone                   | Tropic Zone                   | Foster, Lewis R.                     | Lewis R. Foster       | tt0046462 |
| 1745293564 | 2006 | 2006 | Madea's Family Reunion        | Madea's Family Reunion        | Perry, Tyler                         | Tyler Perry           | tt0455612 |
| 1746248478 | 1968 | 1968 | Beware The Black Widow        | Beware the Black Widow        | Crane, Larry                         | Larry Crane           | tt0211247 |
| 1746566256 | 1954 | 1954 | Three Young Texans            | Three Young Texans            | Levin, Henry                         | Henry Levin           | tt0047583 |
| 1746520254 | 1925 | 1925 | His People                    | His People                    | Sloman, Edward                       | Edward Sloman         | tt0015918 |
| 1746496034 | 1920 | 1920 | The Thirtieth Piece of Silver | The Thirtieth Piece of Silver | Cox, George L.                       | George L. Cox         | tt0202624 |
| 1745341868 | 2002 | 2002 | My Big Fat Greek Wedding      | My Big Fat Greek Wedding      | Zwick, Joel                          | Joel Zwick            | tt0259446 |
| 1746581618 | 1910 | 1910 | His Last Burglary             | His Last Burglary             | Griffith, D. W.                      | D.W. Griffith         | tt0001248 |
| 1746533053 | 1923 | 1923 | Pure Grit                     | Pure Grit                     | Ross, Nat                            | Nat Ross              | tt0014381 |
| 1746454100 | 1942 | 1942 | Secrets of a Co-ed            | Secrets of a Co Ed            | Lewis, Joseph H.                     | Joseph H. Lewis       | tt0165938 |
| 1745357968 | 2009 | 2009 | The Cove                      | Come                          | Psihoyos, Louie                      | Kirk Chastain         | tt1710955 |
| 1746453694 | 1995 | 1994 | Rave Review                   | Rave Review                   | Seymour, Jeff                        | Jeff Seymour          | tt0110946 |
| 1745341851 | 2009 | 2008 | Ice People                    | Ice People                    | Aghion, Anne                         | Anne Aghion           | tt1234433 |
| 1746465312 | 1944 | 1944 | Crazy Knights                 | Crazy Knights                 | Beaudine, William                    | William Beaudine      | tt0036728 |
| 1746570824 | 1934 | 1934 | There's Always Tomorrow       | There's Always Tomorrow       | Sloman, Edward                       | Edward Sloman         | tt0025876 |
| 1746498481 | 1919 | 1919 | The World Aflame              | The World Aflame              | Warde, Ernest C.                     | Ernest C. Warde       | tt0010919 |
| 1746585463 | 1940 | 1940 | Passport to Alcatraz          | Passport to Alcatraz          | Collins, Lewis D.                    | Lewis D. Collins      | tt0032893 |
| 1746524311 | 1916 | 1916 | The Supreme Temptation        | The Supreme Temptation        | Davenport, Harry                     | Harry Davenport       | tt0007412 |
| 1746508148 | 1925 | 1925 | The Blood Bond                | The Blood Bond                | Maloney, Leo                         | Leo D. Maloney        | tt0015628 |
| 1746580209 | 1937 | 1937 | Blonde Trouble                | Blonde Trouble                | Archainbaud, George                  | George Archainbaud    | tt0028641 |
| 1746520716 | 1925 | 1925 | Santa Fe Pete                 | Santa Fe Pete                 | Webb, Harry S.                       | Harry S. Webb         | tt0161958 |
| 1746571968 | 1931 | 1931 | Men of the Sky                | Men of the Sky                | Green, Alfred E.                     | Alfred E. Green       | tt0022138 |
| 1746578902 | 1962 | 1962 | The Horizontal Lieutenant     | The Horizontal Lieutenant     | Thorpe, Richard                      | Richard Thorpe        | tt0056079 |
| 1746579063 | 1961 | 1961 | The Big Show                  | The Big Show                  | Clark, James B.                      | James B. Clark        | tt0054681 |
| 1746466941 | 1917 | 1917 | The Public Be Damned          | Public Be Damned              | Taylor, S. E. V.                     | Stanner E.V. Taylor   | tt0008471 |
| 1746508084 | 1925 | 1925 | Graustark                     | Graustark                     | Buchowetzki, Dimitri                 | Dimitri Buchowetzki   | tt0015874 |
| 1746394171 | 1987 | 1987 | Moonstruck                    | Moonstruck                    | Jewison, Norman                      | Norman Jewison        | tt0093565 |
| 1746563007 | 1952 | 1951 | On Dangerous Ground           | On Dangerous Ground           | Ray, Nicholas                        | Nicholas Ray          | tt0043879 |
| 1746454723 | 1999 | 1999 | The Wood                      | The Wood                      | Famuyiwa, Rick                       | Rick Famuyiwa         | tt0161100 |
| 1746524773 | 1915 | 1915 | Bella Donna                   | Bella Donna                   | Porter, Edwin S.; Ford, Hugh         | Hugh Ford             | tt0004956 |
| 1746210820 | 1973 | 1973 | Shaft in Africa               | Shaft in Africa               | Guillermin, John                     | John Guillermin       | tt0070679 |
| 1746520825 | 1949 | 1949 | The Red Danube                | The Red Danube                | Sidney, George                       | George Sidney         | tt0041788 |
| 1745341539 | 2010 | 2010 | The Extra Man                 | The Extra Man                 | Berman, Shari Springer; Pulcini, Rob | Shari Springer Berman | tt1361313 |
| 1746584525 | 1929 | 1929 | The Sophomore                 | The Sophomore                 | McCarey, Leo                         | Leo McCarey           | tt0020436 |
| 1746582516 | 1939 | 1939 | Girl from Rio                 | Girl from Rio                 | Hillyer, Lambert                     | Lambert Hillyer       | tt0031371 |
| 1746436214 | 1990 | 1990 | Night of the Living Dead      | Night of the Living Dead      | Savini, Tom                          | Tom Savini            | tt0100258 |
| 1746454015 | 1943 | 1943 | Calling Dr. Death             | Calling Dr. Death             | LeBorg, Reginald                     | Reginald Le Borg      | tt0035706 |
| 1746436264 | 1992 | 1992 | Poison Ivy                    | Poison Ivy                    | Ruben, Katt Shea                     | Katt Shea             | tt0105156 |
| 1746560971 | 1932 | 1932 | Sally of the Subway           | Sally of the Subway           | Seitz, George B.                     | George B. Seitz       | tt0023421 |
| 1746514077 | 1916 | 1916 | Casey at the Bat              | Casey at the Bat              | Ingraham, Lloyd                      | Lloyd Ingraham        | tt0006491 |
| 1745359146 | 2001 | 2001 | Sugar & Spice                 | Sugar & Spice                 | McDougall, Francine                  | Francine McDougall    | tt0186589 |
| 1746513698 | 1928 | 1928 | The Last Moment               | The Last Moment               | Fejos, Paul                          | Pál Fejös             | tt0019072 |
| 1746269652 | 1978 | 1978 | Piranha                       | Piranha                       | Dante, Joe                           | Joe Dante             | tt0078087 |
| 1746581316 | 1910 | 1910 | The Hobble Skirt              | The Hobble Skirt              |                                      |                       | tt1195745 |
| 1746500328 | 1926 | 1927 | The Night Owl                 | Night Owls                    | Brown, Harry J.                      | Mark Sandrich         | tt0349888 |
| 1746573586 | 1932 | 1932 | Blessed Event                 | Blessed Event                 | Del Ruth, Roy                        | Roy Del Ruth          | tt0022696 |
| 1746250733 | 1978 | 1978 | Big Wednesday                 | Big Wednesday                 | Milius, John                         | John Milius           | tt0077235 |
| 1746494195 | 1913 | 1913 | In the Stretch                | In the Stretch                | Davis, Will S.                       | Will S. Davis         | tt0003008 |
| 1746580212 | 1938 | 1938 | Listen, Darling               | Listen, Darling               | Marin, Edwin L.                      | Edwin L. Marin        | tt0030368 |
| 1746487051 | 1918 | 1918 | Social Hypocrites             | Social Hypocrites             | Capellani, Albert                    | Albert Capellani      | tt0009627 |
| 1746500683 | 1924 | 1924 | Coyote Fangs                  | Coyote Fangs                  | Webb, Harry                          | Harry S. Webb         | tt0014805 |
| 1746500433 | 1926 | 1926 | The Great Deception           | The Great Deception           | Higgin, Howard                       | Howard Higgin         | tt0016937 |
| 1746514747 | 1917 | 1917 | The Adventurer                | The Adventurer                | Blaché, Alice                        | Alice Guy             | tt0007614 |
| 1746582262 | 1928 | 1928 | Stocks and Blondes            | Stocks and Blondes            | Murphy, Dudley                       | Dudley Murphy         | tt0019423 |

|            |      |      |                                                 |                                                 |                                       |                       |           |
|------------|------|------|-------------------------------------------------|-------------------------------------------------|---------------------------------------|-----------------------|-----------|
| 1746581488 | 1960 | 1960 | The Touch of Flesh                              | The Touch of Flesh                              | Hugh, R. John                         | R. John Hugh          | tt0054397 |
| 1746272240 | 1979 | 1979 | The Dark                                        | The Dark                                        | Cardos, John "Bud"                    | John 'Bud' Cardos     | tt0079027 |
| 1746581977 | 1928 | 1928 | Souls Aflame                                    | Souls Aflame                                    | Wells, Raymond                        | Raymond Wells         | tt0165951 |
| 1746419798 | 1994 | 1994 | Leprechaun 2                                    | Leprechaun 2                                    | Flender, Rodman                       | Rodman Flender        | tt0110329 |
| 1746491865 | 1948 | 1948 | A Date with Judy                                | A Date with Judy                                | Thorpe, Richard                       | Richard Thorpe        | tt0040271 |
| 1746219196 | 1972 | 1972 | The Final Comedown                              | The Final Comedown                              | Williams, Oscar                       | Oscar Williams        | tt0068588 |
| 1746581764 | 1910 | 1910 | The Golden Secret                               | The Golden Secret                               |                                       | William F. Haddock    | tt2239166 |
| 1746475975 | 1948 | 1948 | 13 Lead Soldiers                                | 13 Lead Soldiers                                | McDonald, Frank                       | Frank McDonald        | tt0040063 |
| 1746576616 | 1932 | 1932 | Cabin in the Cotton                             | The Cabin in the Cotton                         | Curtiz, Michael                       | Michael Curtiz        | tt0022735 |
| 1746486501 | 1921 | 1922 | The Jolt                                        | The Jilt                                        | Marshall, George E.                   | Irving Cummings       | tt0013277 |
| 1746234153 | 1966 | 1966 | Teenage Gang Debs                               | Teenage Gang Debs                               | Johnsen, Sande                        | Sande N. Johnsen      | tt0061070 |
| 1746583985 | 1938 | 1938 | Prison Farm                                     | Prison Farm                                     | King, Louis                           | Louis King            | tt0030626 |
| 1746581729 | 1950 | 1950 | Six Gun Mesa                                    | Six Gun Mesa                                    | Fox, Wallace W.                       | Wallace Fox           | tt0271190 |
| 1746493763 | 1914 | 1914 | Fire and Sword                                  | Fire and Sword                                  | Hunter, T. Hayes                      | T. Hayes Hunter       | tt0003965 |
| 1746475728 | 1946 | 1946 | Don't Gamble with Strangers                     | Don't Gamble with Strangers                     | Beaudine, William                     | William Beaudine      | tt0038485 |
| 1746566348 | 1954 | 1954 | The Boy from Oklahoma                           | The Boy from Oklahoma                           | Curtiz, Michael                       | Michael Curtiz        | tt0046804 |
| 1746502820 | 1914 | 1914 | The House Next Door                             | The House Next Door                             | O'Neil, Barry                         | Barry O'Neil          | tt0004125 |
| 1769971898 | 1969 | 1969 | How Many Times                                  | How Many Times                                  | Shiffen, Arlo                         | Don Walters           | tt0141248 |
| 1746554541 | 1964 | 1964 | A Shot in the Dark                              | A Shot in the Dark                              | Edwards, Blake                        | Blake Edwards         | tt0058586 |
| 1746475961 | 1944 | 1944 | Guns of the Law                                 | Guns of the Law                                 | Clifton, Elmer                        | Elmer Clifton         | tt0036888 |
| 1746492231 | 1944 | 1944 | The Invisible Man's Revenge                     | The Invisible Man's Revenge                     | Beebe, Ford                           | Ford Beebe            | tt0036959 |
| 1746567970 | 1933 | 1933 | Footlight Parade                                | Footlight Parade                                | Bacon, Lloyd                          | Lloyd Bacon           | tt0024028 |
| 1769974371 | 1916 | 1916 | A Daughter of the Woods                         | A Daughter of the Woods                         |                                       |                       | tt333326  |
| 1746584955 | 1939 | 1939 | Flaming Lead                                    | Flaming Lead                                    | Newfield, Sam                         | Sam Newfield          | tt0031318 |
| 1746577225 | 1950 | 1950 | Surrender                                       | Surrender                                       | Dwan, Allan                           | Allan Dwan            | tt0043017 |
| 1746492726 | 1945 | 1945 | The True Glory                                  | The True Glory                                  | Reed, Carol; Kanin, Garson            | Garson Kanin          | tt0038192 |
| 1746486798 | 1919 | 1919 | The Rough Neck                                  | The Rough Neck                                  | Apfel, Oscar                          | Oscar Apfel           | tt0010644 |
| 1746455355 | 1995 | 1995 | Live Nude Girls                                 | Live Nude Girls                                 | Lavin, Julianna                       | Julianna Lavin        | tt0113674 |
| 1746565922 | 1953 | 1953 | Julius Caesar                                   | Julius Caesar                                   | Mankiewicz, Joseph L.                 | Joseph L. Mankiewicz  | tt0045943 |
| 1746530764 | 1949 | 1949 | Deputy Marshal                                  | Deputy Marshal                                  | Berke, William                        | William Berke         | tt0041289 |
| 1746560034 | 1963 | 1963 | The Three Stooges Go Around the World in a Daze | The Three Stooges Go Around the World in a Daze | Maurer, Norman                        | Norman Maurer         | tt0057580 |
| 1746584322 | 1939 | 1939 | The Mysterious Miss X                           | The Mysterious Miss X                           | Meins, Gus                            | Gus Meins             | tt0031701 |
| 1745341542 | 2002 | 2002 | Sweet Home Alabama                              | Sweet Home Alabama                              | Tennant, Andy                         | Andy Tennant          | tt0256415 |
| 1769971205 | 1969 | 1969 | The Ultimate Voyeur                             | The Ultimate Voyeur                             |                                       | Cosmo Vance           | tt0153409 |
| 1746420118 | 1993 | 1993 | Geronimo: An American Legend                    | Geronimo: An American Legend                    | Hill, Walter                          | Walter Hill           | tt0107004 |
| 1746502216 | 1916 | 1916 | The Shadow of a Doubt                           | The Shadow of a Doubt                           |                                       | Wray Bartlett Physioc | tt0158946 |
| 1746475514 | 1946 | 1946 | Fight That Ghost                                | Fight That Ghost                                | Newfield, Sam                         | Sam Newfield          | tt0135420 |
| 1746524444 | 1916 | 1916 | The Market of Vain Desire                       | The Market of Vain Desire                       | Barker, Reginald                      | Reginald Barker       | tt0007040 |
| 1746394745 | 1987 | 1987 | American Ninja 2: The Confrontation             | American Ninja 2: The Confrontation             | Firstenberg, Sam                      | Sam Firstenberg       | tt0092548 |
| 1746197904 | 1966 | 1966 | The "Imp"probable Mr. Wee Gee                   | The 'Imp'probable Mr. Wee Gee                   | Price, Sherman                        | Sherman Price         | tt0220948 |
| 1746491999 | 1948 | 1948 | The Tender Years                                | The Tender Years                                | Schuster, Harold                      | Harold D. Schuster    | tt0039890 |
| 1746584551 | 1931 | 1931 | Dragnet Patrol                                  | Dragnet Patrol                                  | Strayer, Frank                        | Frank R. Strayer      | tt0022836 |
| 1746571815 | 1910 | 1910 | Cyclone Pete's Matrimony                        | Cyclone Pete's Matrimony                        |                                       | William F. Haddock    | tt0001174 |
| 1746453643 | 1943 | 1943 | Bordertown Gun Fighters                         | Bordertown Gun Fighters                         | Bretherton, Howard                    | Howard Bretherton     | tt0035693 |
| 1746583000 | 1936 | 1936 | Step on It                                      | Step on It                                      | Samuels, Henri                        | Harry S. Webb         | tt0140570 |
| 1746584058 | 1940 | 1940 | Tin Pan Alley                                   | Tin Pan Alley                                   | Lang, Walter                          | Walter Lang           | tt0033167 |
| 1746512732 | 1915 | 1915 | The Reform Candidate                            | The Reform Candidate                            | Lloyd, Frank                          | Frank Lloyd           | tt0005959 |
| 1746392776 | 1983 | 1983 | Scarface                                        | Scarface                                        | DePalma, Brian                        | Brian De Palma        | tt0086250 |
| 1746585042 | 1939 | 1939 | Ex-Champ                                        | Ex Champ                                        | Rosen, Philip                         | Phil Rosen            | tt0031287 |
| 1746454604 | 1999 | 1998 | Naturally Native                                | Naturally Native                                | Red-Horse, Valerie ; Farmer, Jennifer | Jennifer Wynne Farmer | tt0133117 |
| 1746502588 | 1917 | 1917 | The Dancer's Peril                              | The Dancer's Peril                              | Vale, Travers                         | Travers Vale          | tt0007834 |
| 1746581578 | 1910 | 1910 | The Impalement                                  | The Impalement                                  | Griffith, D. W.                       | D.W. Griffith         | tt0001260 |
| 1746580494 | 1938 | 1938 | A Trip to Paris                                 | A Trip to Paris                                 | St. Clair, Mal                        | Malcolm St. Clair     | tt0030894 |
| 1746467711 | 1917 | 1917 | Society's Driftwood                             | Society's Driftwood                             | Chaudet, Louis William                | Louis Chaudet         | tt0008597 |
| 1746580592 | 1936 | 1936 | Riffraff                                        | Riffraff                                        | Ruben, J. Walter                      | J. Walter Ruben       | tt0026932 |
| 1746524076 | 1927 | 1927 | Alias the Deacon                                | Alias the Deacon                                | Sloman, Edward                        | Edward Sloman         | tt0018639 |
| 1746520811 | 1926 | 1926 | The Last Chance                                 | The Last Chance                                 | Carpenter, H. B.                      | Horace B. Carpenter   | tt0160445 |

|            |      |      |                                  |                                  |                                   |                       |           |
|------------|------|------|----------------------------------|----------------------------------|-----------------------------------|-----------------------|-----------|
| 1746570442 | 1934 | 1934 | Return of the Terror             | Return of the Terror             | Bretherton, Howard                | Howard Bretherton     | tt0025714 |
| 1746574933 | 1936 | 1936 | Marihuana                        | Marihuana                        | Esper, Dwain                      | Dwain Esper           | tt0026683 |
| 1746584858 | 1930 | 1930 | Leathernecking                   | Leathernecking                   | Cline, Edward                     | Edward F. Cline       | tt0021057 |
| 1746584182 | 1935 | 1935 | Cyclone of the Saddle            | Cyclone of the Saddle            | Clifton, Elmer                    | Elmer Clifton         | tt0026254 |
| 1746420971 | 1994 | 1994 | Ready to Wear                    | Ready to Wear                    | Altman, Robert                    | Robert Altman         | tt0110907 |
| 1746585327 | 1929 | 1929 | Thundering Thompson              | Thundering Thompson              | Wilson, B. Frank                  | Ben F. Wilson         | tt0020500 |
| 1746496812 | 1919 | 1919 | Yankee Doodle in Berlin          | Yankee Doodle in Berlin          | Jones, Richard                    | F. Richard Jones      | tt0010925 |
| 1746530733 | 1950 | 1949 | Sands of Iwo Jima                | Sands of Iwo Jima                | Dwan, Allan                       | Allan Dwan            | tt0041841 |
| 1746583580 | 1928 | 1928 | The Crimson City                 | The Crimson City                 | Mayo, Archie                      | Archie Mayo           | tt0018804 |
| 1746421310 | 1993 | 1993 | Son-In-Law                       | Son in Law                       | Rash, Steve                       | Steve Rash            | tt0108186 |
| 1746585035 | 1939 | 1939 | The Fighting Renegade            | The Fighting Renegade            | Newfield, Sam                     | Sam Newfield          | tt0031306 |
| 1746434244 | 1990 | 1990 | Basket Case 2                    | Basket Case 2                    | Henenlotter, Frank                | Frank Henenlotter     | tt0099108 |
| 1746542761 | 1924 | 1924 | Sundown                          | Sundown                          | Trimble, Laurence; Hoyt, Harry O. | Harry O. Hoyt         | tt0015379 |
| 1746501525 | 1914 | 1914 | The Will O' the Wisp             | The Will o' the Wisp             | Otto, Henry                       | Henry Otto            | tt0004817 |
| 1746508734 | 1924 | 1924 | The Measure of a Man             | The Measure of a Man             | Rosson, Arthur                    | Arthur Rosson         | tt0015127 |
| 1746436790 | 1998 | 1997 | Men with Guns                    | Men with Guns                    | Sayles, John                      | John Sayles           | tt0119657 |
| 1746567994 | 1933 | 1932 | After the Ball                   | After the Ball                   | Rosmer, Milton                    | Milton Rosmer         | tt0023743 |
| 1746508409 | 1927 | 1926 | Smashed Back                     | Smashed Back                     |                                   | Forrest Sheldon       | tt1694101 |
| 1746584481 | 1930 | 1930 | Temple Tower                     | Temple Tower                     | Gallagher, Donald                 | Donald Gallagher      | tt0021457 |
| 1746555670 | 1956 | 1956 | The Catered Affair               | The Catered Affair               | Brooks, Richard                   | Richard Brooks        | tt0049061 |
| 1746553796 | 1965 | 1965 | The World of Abbott and Costello | The World of Abbott and Costello |                                   | Charles Barton        | tt0059921 |
| 1746500525 | 1949 | 1949 | Dynamite                         | Dynamite                         | Pine, William H.                  | William H. Pine       | tt0041325 |
| 1746561985 | 1954 | 1954 | Overland Pacific                 | Overland Pacific                 | Sears, Fred F.                    | Fred F. Sears         | tt0047323 |
| 1769970176 | 1912 | 1912 | War's Havoc                      | War's Havoc                      |                                   | Kenean Buel           | tt0002568 |
| 1746392673 | 1981 | 1981 | Continental Divide               | Continental Divide               | Apted, Michael                    | Michael Apted         | tt0082200 |
| 1746502037 | 1916 | 1916 | Hidden Valley                    | Hidden Valley                    | Warde, Ernest                     | Ernest C. Warde       | tt0157754 |
| 1746582518 | 1935 | 1935 | Lawless Riders                   | Lawless Riders                   | Bennet, Spencer Gordon            | Spencer Gordon Bennet | tt0026615 |
| 1746513657 | 1916 | 1916 | The Twin Triangle                | The Twin Triangle                | Harvey, Harry                     | Harry Harvey          | tt0007484 |
| 1746186196 | 1965 | 1965 | Once a Thief                     | Once a Thief                     | Nelson, Ralph                     | Ralph Nelson          | tt0059540 |
| 1746508899 | 1926 | 1926 | The Blackbird                    | The Blackbird                    | Browning, Tod                     | Tod Browning          | tt0016655 |
| 1746582623 | 1935 | 1935 | I'll Love You Always             | I'll Love You Always             | Bulgakov, Leo                     | Leo Bulgakov          | tt0026514 |
| 1746569510 | 1957 | 1957 | Stopover Tokyo                   | Stopover Tokyo                   | Breen, Richard L.                 | Richard L. Breen      | tt0051011 |
| 1746437158 | 1999 | 1999 | Molly                            | Molly                            | Duigan, John                      | John Duigan           | tt0143746 |
| 1746582152 | 1929 | 1929 | Daughters of Desire              | Daughters of Desire              | King, Burton                      | Burton L. King        | tt0019807 |
| 1746566139 | 1958 | 1958 | Joy Ride                         | Joy Ride                         | Bernds, Edward                    | Edward Bernds         | tt0051803 |
| 1746570454 | 1933 | 1933 | The Life of Jimmy Dolan          | The Life of Jimmy Dolan          | Mayo, Archie                      | Archie Mayo           | tt0024257 |
| 1746485567 | 1918 | 1918 | Beauty and the Rogue             | Beauty and the Rogue             | King, Henry                       | Henry King            | tt0008869 |
| 1746409933 | 1991 | 1990 | Lionheart                        | Lionheart                        | Lettich, Sheldon                  | Sheldon Lettich       | tt0100029 |
| 1746542676 | 1948 | 1948 | Triggerman                       | Triggerman                       | Bretherton, Howard                | Howard Bretherton     | tt0040903 |
| 1746577387 | 1958 | 1958 | The Whole Truth                  | The Whole Truth                  | Guillermin, John                  | John Guillermin       | tt0052391 |
| 1746421583 | 1995 | 1994 | Don Juan DeMarco                 | Don Juan DeMarco                 | Leven, Jeremy                     | Jeremy Leven          | tt0112883 |
| 1746423337 | 1992 | 1992 | This Is My Life                  | This Is My Life                  | Ephron, Nora                      | Nora Ephron           | tt0105577 |
| 1745341998 | 2008 | 2008 | Forgetting Sarah Marshall        | Forgetting Sarah Marshall        | Stoller, Nicholas                 | Nicholas Stoller      | tt0800039 |
| 1746420361 | 1988 | 1988 | Rambo III                        | Rambo III                        | MacDonald, Peter                  | Peter MacDonald       | tt0095956 |
| 1746504764 | 1918 | 1918 | The Lady of the Dug-Out          | The Lady of the Dugout           | Van Dyke, W. S.                   | W.S. Van Dyke         | tt0009273 |
| 1746573824 | 1958 | 1958 | Imitation General                | Imitation General                | Marshall, George                  | George Marshall       | tt0051767 |
| 1746554275 | 1964 | 1964 | Babo 73                          | Babo 73                          | Downey, Robert                    | Robert Downey Sr.     | tt0138311 |
| 1746438600 | 1945 | 1945 | China Sky                        | China Sky                        | Enright, Ray                      | Ray Enright           | tt0037593 |
| 1746584259 | 1935 | 1935 | Mister Dynamite                  | Mister Dynamite                  | Crosland, Alan                    | Alan Crosland         | tt0026724 |
| 1746584635 | 1929 | 1929 | The Voice Within                 | The Voice Within                 | Archainbaud, George               | George Archainbaud    | tt0020559 |
| 1746582384 | 1931 | 1931 | Two Gun Man                      | The Two Gun Man                  | Rosen, Phil                       | Phil Rosen            | tt0022514 |
| 1746453853 | 1941 | 1941 | A Dangerous Game                 | A Dangerous Game                 | Rawlins, John                     | John Rawlins          | tt0033509 |
| 1746485621 | 1920 | 1920 | Silk Hosiery                     | Silk Hosiery                     | Niblo, Fred                       | Fred Niblo            | tt0012687 |
| 1746394702 | 1983 | 1983 | Jaws 3-D                         | Jaws 3 D                         | Alves, Joe                        | Joe Alves             | tt0085750 |
| 1746582194 | 1928 | 1928 | While the City Sleeps            | While the City Sleeps            | Conway, Jack                      | Jack Conway           | tt0019571 |
| 1746422010 | 1990 | 1990 | Almost an Angel                  | Almost an Angel                  | Cornell, John                     | John Cornell          | tt0099018 |
| 1746249987 | 1975 | 1975 | Milestones                       | Milestones                       | Douglas, John; Kramer, Robert     | John Douglas          | tt0073389 |

|            |      |      |                                  |                                  |                                       |                    |           |
|------------|------|------|----------------------------------|----------------------------------|---------------------------------------|--------------------|-----------|
| 1746575077 | 1935 | 1935 | East of Java                     | East of Java                     | Melford, George                       | George Melford     | tt0026304 |
| 1746576327 | 1931 | 1931 | Expensive Women                  | Expensive Women                  | Henley, Hobart                        | Hobart Henley      | tt0021845 |
| 1746504031 | 1920 | 1919 | Hidden Charms                    | Hidden Charms                    | Brodsky, Samuel                       | Samuel Brodsky     | tt0179847 |
| 1746434877 | 1999 | 1999 | Tequila Body Shots               | Tequila Body Shots               | Shyu, Tony                            | Tony Shyu          | tt0144637 |
| 1746580753 | 1938 | 1938 | Starlight over Texas             | Starlight Over Texas             | Herman, Al                            | Albert Herman      | tt0030791 |
| 1746571370 | 1935 | 1935 | Accent on Youth                  | Accent on Youth                  | Ruggles, Wesley                       | Wesley Ruggles     | tt0026034 |
| 1746514612 | 1916 | 1916 | The Shop Girl                    | The Shop Girl                    | Baker, George D.                      | George D. Baker    | tt0007342 |
| 1746576585 | 1931 | 1931 | Local Boy Makes Good             | Local Boy Makes Good             | LeRoy, Mervyn                         | Mervyn LeRoy       | tt0022085 |
| 1746454212 | 1943 | 1943 | Paris After Dark                 | Paris After Dark                 | Moguy, Leonide                        | Léonide Moguy      | tt0036251 |
| 1746422091 | 1940 | 1940 | Young Bill Hickok                | Young Bill Hickok                | Kane, Joseph                          | Joseph Kane        | tt0033286 |
| 1746570161 | 1933 | 1933 | Master of Men                    | Master of Men                    | Hillyer, Lambert                      | Lambert Hillyer    | tt0024309 |
| 1746570007 | 1958 | 1958 | Macabre                          | Macabre                          | Castle, William                       | William Castle     | tt0051885 |
| 1746218432 | 1967 | 1967 | Gentle Giant                     | Gentle Giant                     | Neilson, James                        | James Neilson      | tt0061703 |
| 1746467828 | 1917 | 1917 | House of Cards                   | House of Cards                   | Blaché, Alice Guy                     | Alice Guy          | tt0008123 |
| 1746422176 | 1995 | 1995 | Vampire in Brooklyn              | Vampire in Brooklyn              | Craven, Wes                           | Wes Craven         | tt0114825 |
| 1746584134 | 1940 | 1940 | High School                      | High School                      | Nicholls, George                      | George Nichols Jr. | tt0032595 |
| 1746566158 | 1957 | 1957 | Taming Sutton's Gal              | Taming Sutton's Gal              | Selander, Lesley                      | Lesley Selander    | tt0051050 |
| 1746571896 | 1931 | 1931 | The Beloved Bachelor             | Beloved Bachelor                 | Corrigan, Lloyd                       | Lloyd Corrigan     | tt0021651 |
| 1769969500 | 1911 | 1911 | Love Heeds Not Showers           | Love Heeds Not Showers           | Moore, Owen                           | Owen Moore         | tt0001749 |
| 1746500042 | 1924 | 1924 | Shootin' Square                  | Shootin' Square                  |                                       |                    | tt0132511 |
| 1746499955 | 1950 | 1950 | The Flying Saucer                | The Flying Saucer                | Conrad, Mikel                         | Mikel Conrad       | tt0042469 |
| 1746525065 | 1920 | 1920 | Sherry                           | Sherry                           | Lewis, Edgar                          | Edgar Lewis        | tt0197875 |
| 1746500891 | 1916 | 1915 | Ambition                         | Ambition                         | Vincent, James                        | Howard M. Mitchell | tt0412360 |
| 1746585004 | 1940 | 1940 | Christmas in July                | Christmas in July                | Sturges, Preston                      | Preston Sturges    | tt0032338 |
| 1745374399 | 2002 | 2001 | Circuit                          | Circuit                          | Shafer, Dirk                          | Dirk Shafer        | tt0218107 |
| 1745293318 | 2007 | 2007 | You Kill Me                      | You Kill Me                      | Dahl, John                            | John Dahl          | tt0796375 |
| 1769970455 | 1967 | 1967 | The Hookers                      | The Hookers                      | Horthy, Jalo Miklos                   | Jalo Miklos Horthy | tt0219808 |
| 1746567004 | 1932 | 1932 | The Washington Masquerade        | The Washington Masquerade        | Brabin, Charles                       | Charles Brabin     | tt0023672 |
| 1746583199 | 1929 | 1929 | Mother's Boy                     | Mother's Boy                     | Barker, Bradley                       | Bradley Barker     | tt0020187 |
| 1746408702 | 1987 | 1987 | Morgan Stewart's Coming Home     | Morgan Stewart's Coming Home     | Smithee, Alan; Winsor , Terry ; Aaron | Paul Aaron         | tt0093567 |
| 1746543073 | 1916 | 1916 | The Plow Girl                    | The Plow Girl                    | Leonard, Robert                       | Robert Z. Leonard  | tt0007192 |
| 1746577735 | 1936 | 1936 | Three on the Trail               | Three on the Trail               | Bretherton, Howard                    | Howard Bretherton  | tt0028377 |
| 1746582643 | 1938 | 1938 | Two Gun Justice                  | Two Gun Justice                  | James, Alan                           | Alan James         | tt0030903 |
| 1746486285 | 1919 | 1919 | The Poppy Girl's Husband         | The Poppy Girl's Husband         | Hart, William S.; Hillyer, Lambert    | William S. Hart    | tt0010581 |
| 1746211076 | 1971 | 1971 | Carnal Knowledge                 | Carnal Knowledge                 | Nichols, Mike                         | Mike Nichols       | tt0066892 |
| 1746454736 | 1996 | 1996 | Love Is All There Is             | Love Is All There Is             | Bologna, Joseph                       | Joseph Bologna     | tt0116928 |
| 1746566226 | 1953 | 1953 | Ride, Vaquero!                   | Ride, Vaquero!                   | Farrow, John                          | John Farrow        | tt0046239 |
| 1746515839 | 1922 | 1922 | The Milky Way                    | The Milky Way                    |                                       | W.S. Van Dyke      | tt0013391 |
| 1769970558 | 1968 | 1968 | Darling, Are You Bored With Men? | Darling, Are You Bored with Men? | Meyer, John                           | Nick Millard       | tt0216661 |
| 1746454851 | 1941 | 1941 | The Blonde from Singapore        | The Blonde from Singapore        | Dmytryk, Edward                       | Edward Dmytryk     | tt0033402 |
| 1746508434 | 1950 | 1950 | The Second Woman                 | The Second Woman                 | Kern, James V.                        | James V. Kern      | tt0044013 |
| 1746520183 | 1949 | 1949 | Caught                           | Caught                           | Opuls, Max                            | Max Ophüls         | tt0040221 |
| 1746583187 | 1950 | 1950 | So Young, So Bad                 | So Young So Bad                  | Vorhaus, Bernard                      | Bernard Vorhaus    | tt0042982 |
| 1746497428 | 1918 | 1918 | Her Mistake                      | Her Mistake                      | Steger, Julius                        | Julius Steger      | tt0184563 |
| 1746584537 | 1931 | 1931 | Susan Lenox (Her Fall and Rise)  | Susan Lenox <Her Fall and Rise>  | Leonard, Robert Z.                    | Robert Z. Leonard  | tt0022453 |
| 1746583404 | 1950 | 1950 | Three Came Home                  | Three Came Home                  | Negulesco, Jean                       | Jean Negulesco     | tt0043041 |
| 1746210743 | 1973 | 1973 | Save the Tiger                   | Save the Tiger                   | Avildsen, John G.                     | John G. Avildsen   | tt0070640 |
| 1746563657 | 1953 | 1953 | All the Brothers Were Valiant    | All the Brothers Were Valiant    | Thorpe, Richard                       | Richard Thorpe     | tt0045494 |
| 1746584047 | 1938 | 1938 | Secrets of a Nurse               | Secrets of a Nurse               | Lubin, Arthur                         | Arthur Lubin       | tt0030726 |
| 1746501004 | 1914 | 1914 | Imar the Servitor                | Imar the Servitor                |                                       | John B. O'Brien    | tt0004142 |
| 1746583856 | 1930 | 1930 | Madonna of the Streets           | Madonna of the Streets           | Robertson, John S.                    | John S. Robertson  | tt0021108 |
| 1746584642 | 1929 | 1929 | .45 Calibre War                  | .45 Calibre War                  | Maloney, Leo                          | Leo D. Maloney     | tt0019894 |
| 1769970659 | 1968 | 1968 | The Taming                       | The Taming                       | Arkless, Robert                       | Robert Arkless     | tt0131048 |
| 1746455202 | 1999 | 1999 | The Suburbans                    | The Suburbans                    | Ward, Donal Lardner                   | Donal Lardner Ward | tt0157075 |
| 1746585242 | 1930 | 1930 | Ladies Must Play                 | Ladies Must Play                 | Cannon, Raymond                       | Raymond Cannon     | tt0021038 |
| 1746584249 | 1940 | 1940 | Gangs of Chicago                 | Gangs of Chicago                 | Lubin, Arthur                         | Arthur Lubin       | tt0032509 |
| 1745293738 | 2005 | 2005 | Coach Carter                     | Coach Carter                     | Carter, Thomas                        | Thomas Carter      | tt0393162 |



|            |      |      |                          |                          |                                 |                    |           |
|------------|------|------|--------------------------|--------------------------|---------------------------------|--------------------|-----------|
| 1746233872 | 1968 | 1968 | Wild in the Streets      | Wild in the Streets      | Shear, Barry                    | Barry Shear        | tt0063808 |
| 1746576913 | 1960 | 1959 | Take a Giant Step        | Take a Giant Step        | Leacock, Philip                 | Philip Leacock     | tt0053331 |
| 1746580950 | 1951 | 1951 | Anne of the Indies       | Anne of the Indies       | Tourneur, Jacques               | Jacques Tourneur   | tt0043288 |
| 1746574947 | 1935 | 1935 | North of Arizona         | North of Arizona         | Ray, B. B.                      | Harry S. Webb      | tt0026790 |
| 1746569584 | 1953 | 1953 | Salome                   | Salome                   | Dieterle, William               | William Dieterle   | tt0046269 |
| 1746516469 | 1920 | 1920 | Smiling All the Way      | Smiling All the Way      | Butler, Fred J.                 | Fred J. Butler     | tt0011710 |
| 1746523428 | 1923 | 1923 | A Clouded Name           | A Clouded Name           | Huhn, Austin O.                 | Austin O. Huhn     | tt0013930 |
| 1746583155 | 1937 | 1937 | Git Along Little Dogies  | Git Along Little Dogies  | Kane, Joseph                    | Joseph Kane        | tt0028934 |
| 1746499880 | 1945 | 1945 | Identity Unknown         | Identity Unknown         | Colmes, Walter                  | Walter Colmes      | tt0037811 |
| 1746572206 | 1932 | 1932 | Law and Lawless          | Law and Lawless          | Schaefer, Armand                | Armand Schaefer    | tt0023120 |
| 1746503982 | 1920 | 1920 | The Wrong Woman          | The Wrong Woman          | Abramson, Ivan                  | Ivan Abramson      | tt0012867 |
| 1746570455 | 1933 | 1933 | Smoke Lightning          | Smoke Lightning          | Howard, David                   | David Howard       | tt0024576 |
| 1746582319 | 1929 | 1929 | Wolves of the City       | Wolves of the City       | Jason, Leigh                    | Leigh Jason        | tt0020597 |
| 1746524939 | 1914 | 1914 | The Escape               | The Escape               | Griffith, David W.              | D.W. Griffith      | tt0003890 |
| 1746502995 | 1910 | 1910 | The Tattooed Arm         | The Tattooed Arm         |                                 |                    | tt1793962 |
| 1746576285 | 1931 | 1931 | Strictly Dishonorable    | Strictly Dishonorable    | Stahl, John M.                  | John M. Stahl      | tt0022437 |
| 1746566311 | 1955 | 1955 | Son of Sinbad            | Son of Sinbad            | Tetzlaff, Ted                   | Ted Tetzlaff       | tt0048642 |
| 1746454656 | 1942 | 1942 | Dawn on the Great Divide | Dawn on the Great Divide | Bretherton, Howard              | Howard Bretherton  | tt0034638 |
| 1746584221 | 1939 | 1939 | Jeevers Creepers         | Jeevers Creepers         | McDonald, Frank                 | Frank McDonald     | tt0151123 |
| 1746475265 | 1944 | 1944 | The Racket Man           | The Racket Man           | Lederman, D. Ross               | D. Ross Lederman   | tt0036287 |
| 1746520745 | 1949 | 1949 | Abandoned                | Abandoned                | Newman, Joe                     | Joseph M. Newman   | tt0041084 |
| 1746566668 | 1933 | 1933 | The Emperor Jones        | The Emperor Jones        | Murphy, Dudley                  | Dudley Murphy      | tt0023985 |
| 1746574914 | 1938 | 1938 | Cowboy from Brooklyn     | Cowboy from Brooklyn     | Bacon, Lloyd                    | Lloyd Bacon        | tt0030019 |
| 1746523852 | 1927 | 1927 | The Gay Retreat          | The Gay Retreat          | Stoloff, Ben                    | Benjamin Stoloff   | tt0017921 |
| 1746393289 | 1983 | 1983 | Deal of the Century      | Deal of the Century      | Friedkin, William               | William Friedkin   | tt0085412 |
| 1746520615 | 1949 | 1949 | Angels in Disguise       | Angels in Disguise       | Yarbrough, Jean                 | Jean Yarbrough     | tt0041124 |
| 1746465315 | 1944 | 1944 | Call of the Jungle       | Call of the Jungle       | Rosen, Phil                     | Phil Rosen         | tt0036688 |
| 1746235376 | 1979 | 1979 | C.H.O.M.P.S.             | C.H.O.M.P.S.             | Chaffey, Don                    | Don Chaffey        | tt0078924 |
| 1746507749 | 1925 | 1925 | Bashful Buccaneer        | Bashful Buccaneer        | Brown, Harry J.                 | Harry Joe Brown    | tt0015604 |
| 1746584682 | 1929 | 1929 | Whispering Winds         | Whispering Winds         | Flood, James                    | James Flood        | tt0020583 |
| 1746435722 | 1940 | 1940 | Arizona Frontier         | Arizona Frontier         | Herman, Al                      | Albert Herman      | tt0032222 |
| 1746574558 | 1935 | 1935 | Toll of the Desert       | Toll of the Desert       | Williams, Lester                | William Berke      | tt0028393 |
| 1746198302 | 1970 | 1970 | The Super Fight          | The Super Fight          | Woroner, Murry                  | Murray Woroner     | tt0065050 |
| 1746507853 | 1924 | 1924 | Lone Hand Texas          | The Lone Hand Texan      |                                 | W. Adcock          | tt0246043 |
| 1746577765 | 1938 | 1938 | Boys Town                | Boys Town                | Taugog, Norman                  | Norman Taugog      | tt0029942 |
| 1746423268 | 1992 | 1992 | American Me              | American Me              | Olmos, Edward James             | Edward James Olmos | tt0103671 |
| 1746514456 | 1915 | 1915 | My Valet                 | My Valet                 | Sennett, Mack                   | Mack Sennett       | tt0005792 |
| 1746553561 | 1965 | 1965 | Git!                     | Git!                     | Kadison, Ellis                  | Ellis Kadison      | tt0169953 |
| 1746500725 | 1925 | 1925 | The Handsome Brute       | The Handsome Brute       | Eddy, Robert                    | Robert Eddy        | tt0015890 |
| 1746475246 | 1948 | 1948 | Big Town Scandal         | Big Town Scandal         | Thomas, William C.              | William C. Thomas  | tt0040162 |
| 1746581732 | 1928 | 1927 | Chicago                  | Chicago                  | Urson, Frank; DeMille, Cecil B. | Frank Urson        | tt0017750 |
| 1746514504 | 1923 | 1923 | Can a Woman Love Twice?  | Can a Woman Love Twice?  | Horne, James W.                 | James W. Horne     | tt0013910 |
| 1746421604 | 1993 | 1993 | Hocus Pocus              | Hocus Pocus              | Ortega, Kenny                   | Kenny Ortega       | tt0107120 |
| 1746455897 | 1997 | 1997 | Conspiracy Theory        | Conspiracy Theory        | Donner, Richard                 | Richard Donner     | tt0118883 |
| 1746424364 | 1942 | 1942 | Somewhere I'll Find You  | Somewhere I'll Find You  | Ruggles, Wesley                 | Wesley Ruggles     | tt0035356 |
| 1746567968 | 1933 | 1933 | Rusty Rides Alone        | Rusty Rides Alone        | Lederman, D. Ross               | D. Ross Lederman   | tt0024512 |
| 1746585383 | 1939 | 1939 | The Law Comes to Texas   | The Law Comes to Texas   | Levering, Joseph                | Joseph Levering    | tt0031556 |
| 1746209359 | 1968 | 1968 | The Impossible Years     | The Impossible Years     | Gordon, Michael                 | Michael Gordon     | tt0063128 |
| 1746582865 | 1935 | 1935 | Midnight Phantom         | Midnight Phantom         | Ray, B. B.                      | Bernard B. Ray     | tt0026711 |
| 1746569652 | 1957 | 1957 | War Drums                | War Drums                | LeBorg, Reginald                | Reginald Le Borg   | tt0051179 |
| 1746515065 | 1922 | 1922 | Angel Citizens           | Angel Citizens           | Ford, Francis                   | Francis Ford       | tt0013664 |
| 1746523366 | 1922 | 1922 | Gun Shy                  | Gun Shy                  | Neitz, Alvin J.                 | Alan James         | tt0013208 |
| 1746520299 | 1925 | 1925 | Peacock Feathers         | Peacock Feathers         | Gade, Svend                     | Svend Gade         | tt0016206 |
| 1746561051 | 1932 | 1932 | The Midnight Lady        | The Midnight Lady        | Thorpe, Richard                 | Richard Thorpe     | tt0023218 |
| 1746524611 | 1915 | 1915 | Judy Forgot              | Judy Forgot              | Hunter, T. Hayes                | T. Hayes Hunter    | tt0005578 |
| 1746419285 | 1940 | 1940 | Gold Rush Maisie         | Gold Rush Maisie         | Marin, Edwin L.                 | Edwin L. Marin     | tt0032539 |
| 1746513611 | 1916 | 1916 | Life's Shadows           | Life's Shadows           | Nigh, William                   | William Nigh       | tt0006921 |

|            |      |      |                                        |                                        |                               |                    |           |
|------------|------|------|----------------------------------------|----------------------------------------|-------------------------------|--------------------|-----------|
| 1746566911 | 1934 | 1934 | Dr. Monica                             | Dr. Monica                             | Keighley, William             | William Keighley   | tt0025068 |
| 1746248753 | 1980 | 1979 | Smokey and the Hotwire Gang            | Smokey and the Hotwire Gang            | Cardoza, Anthony              | Anthony Cardoza    | tt0188203 |
| 1746497504 | 1917 | 1917 | The Flashlight                         | The Flashlight                         | Park, Ida May                 | Ida May Park       | tt0007955 |
| 1746574197 | 1963 | 1963 | Operation Bikini                       | Operation Bikini                       | Carras, Anthony               | Anthony Carras     | tt0057387 |
| 1746584709 | 1929 | 1929 | Silent Sentinel                        | Silent Sentinel                        | Neitz, Alvin J.               | Alan James         | tt0019383 |
| 1746560628 | 1932 | 1932 | Street of Women                        | Street of Women                        | Mayo, Archie                  | Archie Mayo        | tt0023529 |
| 1769973216 | 1970 | 1969 | Once Upon a Body                       | Once Upon a Body                       |                               | Sam S. Catah       | tt0064759 |
| 1746507789 | 1924 | 1924 | California in '49                      | California in '49                      | Jaccard, Jacques; Wilson, Ben | Jacques Jaccard    | tt0014756 |
| 1746565928 | 1953 | 1953 | The Nebraskan                          | The Nebraskan                          | Sears, Fred F.                | Fred F. Sears      | tt0046122 |
| 1746585104 | 1929 | 1929 | Kid Gloves                             | Kid Gloves                             | Enright, Ray                  | Ray Enright        | tt0020057 |
| 1746419801 | 1994 | 1994 | Hoop Dreams                            | Hoop Dreams                            | James, Steve                  | Steve James        | tt0110057 |
| 1746574662 | 1933 | 1933 | Secret of the Blue Room                | Secret of the Blue Room                | Neumann, Kurt                 | Kurt Neumann       | tt0024538 |
| 1746533014 | 1928 | 1928 | Manhattan Knights                      | Manhattan Knights                      | King, Burton                  | Burton L. King     | tt0019138 |
| 1746208319 | 1967 | 1967 | Waterhole #3                           | Waterhole #3                           | Graham, William               | William A. Graham  | tt0062477 |
| 1746582595 | 1938 | 1938 | Sons of the Legion                     | Sons of the Legion                     | Hogan, James                  | James P. Hogan     | tt0030771 |
| 1746567742 | 1933 | 1933 | Man's Castle                           | Man's Castle                           | Borzage, Frank                | Frank Borzage      | tt0024302 |
| 1746524406 | 1914 | 1914 | The Dream Woman                        | The Dream Woman                        | Blaché, Alice                 | Alice Guy          | tt0003869 |
| 1746571932 | 1910 | 1910 | A Child's Stratagem                    | A Child's Stratagem                    | Griffith, D. W.               | D. W. Griffith     | tt0001153 |
| 1746533180 | 1915 | 1915 | The Ringtailed Rhinoceros              | The Ringtailed Rhinoceros              | Terwilliger, George           | George Terwilliger | tt0005971 |
| 1746574559 | 1933 | 1933 | This Is America                        | This Is America                        |                               |                    | tt0138872 |
| 1746584958 | 1939 | 1939 | The Man Who Dared                      | The Man Who Dared                      | Wilbur, Crane                 | Crane Wilbur       | tt0031461 |
| 1746566233 | 1954 | 1954 | Valley of the Kings                    | Valley of the Kings                    | Pirosh, Robert                | Robert Pirosh      | tt0047641 |
| 1746583646 | 1931 | 1931 | The Viking                             | The Viking                             | Melford, George               | Varick Frissell    | tt0022537 |
| 1746577734 | 1938 | 1938 | Songs and Bullets                      | Songs and Bullets                      | Newfield, Sam                 | Sam Newfield       | tt0030770 |
| 1745359207 | 2002 | 2002 | The Crocodile Hunter: Collision Course | The Crocodile Hunter: Collision Course | Stainton, John                | John Stainton      | tt0305396 |
| 1746566086 | 1956 | 1957 | Gun Girls                              | Gun Girls                              | Dertano, Robert C.            | Robert C. Dertano  | tt0049284 |
| 1746523359 | 1916 | 1916 | Sorrows of Happiness                   | Sorrows of Happiness                   | Kaufman, Joseph               | Joseph Kaufman     | tt0158976 |
| 1746565501 | 1932 | 1931 | Hell Divers                            | Hell Divers                            | Hill, George                  | George W. Hill     | tt0022987 |
| 1746567997 | 1952 | 1952 | Bela Lugosi Meets a Brooklyn Gorilla   | Bela Lugosi Meets a Brooklyn Gorilla   | Beaudine, William             | William Beaudine   | tt0044406 |
| 1746423530 | 1941 | 1941 | Barnacle Bill                          | Barnacle Bill                          | Thorpe, Richard               | Richard Thorpe     | tt0033378 |
| 1746248495 | 1967 | 1967 | The Graduate                           | The Graduate                           | Nichols, Mike                 | Mike Nichols       | tt0061722 |
| 1746454700 | 1942 | 1942 | The Great Gildersleeve                 | The Great Gildersleeve                 | Douglas, Gordon               | Gordon Douglas     | tt0034810 |
| 1746569714 | 1953 | 1953 | Those Redheads from Seattle            | Those Redheads from Seattle            | Foster, Lewis R.              | Lewis R. Foster    | tt0046422 |
| 1746219425 | 1978 | 1978 | F. I. S. T.                            | F. I. S. T.                            | Jewison, Norman               | Norman Jewison     | tt0077531 |
| 1746577929 | 1935 | 1935 | Sweepstake Annie                       | Sweepstake Annie                       | Nigh, William                 | William Nigh       | tt0027063 |
| 1746507865 | 1926 | 1926 | Fighting Thorobreds                    | Fighting Thorobreds                    | Brown, Harry J.               | Harry Joe Brown    | tt0016868 |
| 1746569954 | 1957 | 1957 | Funny Face                             | Funny Face                             | Donen, Stanley                | Stanley Donen      | tt0050419 |
| 1746419704 | 1940 | 1940 | Billy the Kid in Texas                 | Billy the Kid in Texas                 | Stewart, Peter                | Sam Newfield       | tt0032253 |
| 1746566307 | 1954 | 1954 | Beau Brummell                          | Beau Brummell                          | Bernhardt, Curtis             | Curtis Bernhardt   | tt0046759 |
| 1746454082 | 1942 | 1942 | The Panther's Claw                     | The Panther's Claw                     | Beaudine, William             | William Beaudine   | tt0035171 |
| 1746580988 | 1950 | 1950 | Never a Dull Moment                    | Never a Dull Moment                    | Marshall, George              | George Marshall    | tt0042784 |
| 1746500994 | 1916 | 1916 | The Price of Malice                    | The Price of Malice                    | Lund, O. A. C.                | O. A. C. Lund      | tt0007211 |
| 1746566503 | 1952 | 1953 | Born to the Saddle                     | Born to the Saddle                     | Beaudine, William             | William Beaudine   | tt0045573 |
| 1746563899 | 1952 | 1952 | The Brigand                            | The Brigand                            | Karlson, Phil                 | Phil Karlson       | tt0044449 |
| 1746566277 | 1955 | 1955 | The Left Hand of God                   | The Left Hand of God                   | Dmytryk, Edward               | Edward Dmytryk     | tt0048291 |
| 1746581153 | 1960 | 1959 | Come Back, Africa                      | Come Back, Africa                      | Rogosin, Lionel               | Lionel Rogosin     | tt0049087 |
| 1746569583 | 1955 | 1954 | The Far Country                        | The Far Country                        | Mann, Anthony                 | Anthony Mann       | tt0048055 |
| 1746435158 | 1943 | 1943 | No Time for Love                       | No Time for Love                       | Leisen, Mitchell              | Mitchell Leisen    | tt0036208 |
| 1746516470 | 1920 | 1920 | Bubbles                                | Bubbles                                | Mack, Wayne                   | Wayne Mack         | tt0187763 |
| 1746584585 | 1927 | 1928 | His Last Bullet                        | His Last Bullet                        | Wilson, B. Frank              | Ben F. Wilson      | tt0264685 |
| 1746473906 | 1946 | 1946 | My Pal Trigger                         | My Pal Trigger                         | McDonald, Frank               | Frank McDonald     | tt0038764 |
| 1746512776 | 1915 | 1915 | The Edge of the Abyss                  | The Edge of the Abyss                  | Edwards, Walter               | Walter Edwards     | tt0005237 |
| 1746581534 | 1910 | 1910 | The Irish Boy                          | The Irish Boy                          |                               |                    | tt0233951 |
| 1746437361 | 1943 | 1943 | Riders of the Northwest Mounted        | Riders of the Northwest Mounted        | Berke, William                | William Berke      | tt0166777 |
| 1746454018 | 1942 | 1942 | My Sister Eileen                       | My Sister Eileen                       | Hall, Alexander               | Alexander Hall     | tt0035105 |
| 1746209783 | 1971 | 1971 | Dirty Harry                            | Dirty Harry                            | Siegel, Don                   | Don Siegel         | tt0066999 |
| 1746394191 | 1991 | 1991 | A Kiss Before Dying                    | A Kiss Before Dying                    | Dearden, James                | James Dearden      | tt0102220 |

|            |      |      |                                           |                                           |                                   |                        |           |
|------------|------|------|-------------------------------------------|-------------------------------------------|-----------------------------------|------------------------|-----------|
| 1745359314 | 2002 | 2001 | Harvard Man                               | Harvard Man                               | Toback, James                     | James Toback           | tt0242508 |
| 1746577689 | 1936 | 1936 | The Green Pastures                        | The Green Pastures                        | Connelly, Marc; Keighley, William | Marc Connelly          | tt0027700 |
| 1746582433 | 1936 | 1936 | Poppy                                     | Poppy                                     | Sutherland, A. Edward             | A. Edward Sutherland   | tt0028120 |
| 1746574016 | 1957 | 1957 | I Was a Teenage Werewolf                  | I Was a Teenage Werewolf                  | Fowler, Gene                      | Gene Fowler Jr.        | tt0050530 |
| 1746524860 | 1927 | 1927 | The Warning                               | The Warning                               | Seitz, George B.                  | George B. Seitz        | tt0018549 |
| 1746580767 | 1938 | 1938 | Pals of the Saddle                        | Pals of the Saddle                        | Sherman, George                   | George Sherman         | tt0030550 |
| 1746567234 | 1932 | 1932 | Under-Cover Man                           | Under Cover Man                           | Flood, James                      | James Flood            | tt0023638 |
| 1746583704 | 1931 | 1931 | Three Girls Lost                          | Three Girls Lost                          | Lanfield, Sidney                  | Sidney Lanfield        | tt0022479 |
| 1746566301 | 1954 | 1954 | The Miami Story                           | The Miami Story                           | Sears, Fred F.                    | Fred F. Sears          | tt0047232 |
| 1746584646 | 1928 | 1927 | Hot Heels                                 | Hot Heels                                 | Craft, William James              | William James Craft    | tt0019023 |
| 1746473883 | 1946 | 1946 | Bedlam                                    | Bedlam                                    | Robson, Mark                      | Mark Robson            | tt0038343 |
| 1746219015 | 1980 | 1979 | The Hitter                                | The Hitter                                | Leitch, Christopher               | Christopher Leitch     | tt0179219 |
| 1746569950 | 1958 | 1958 | Sing, Boy, Sing                           | Sing Boy Sing                             | Ephron, Henry                     | Henry Ephron           | tt0052198 |
| 1746454165 | 1997 | 1997 | Star Maps                                 | Star Maps                                 | Arteta, Miguel                    | Miguel Arteta          | tt0120197 |
| 1746424625 | 1940 | 1940 | City of Chance                            | City of Chance                            | Cortez, Ricardo                   | Ricardo Cortez         | tt0032343 |
| 1746570729 | 1934 | 1934 | Hide-Out                                  | Hide Out                                  | Van Dyke, W. S.                   | W.S. Van Dyke          | tt0025251 |
| 1746574444 | 1951 | 1951 | No Questions Asked                        | No Questions Asked                        | Kress, Harold F.                  | Harold F. Kress        | tt0043861 |
| 1746504580 | 1919 | 1919 | 23 1/2 Hours' Leave                       | 23 1/2 Hours' Leave                       | King, Henry                       | Henry King             | tt0009855 |
| 1746586168 | 1939 | 1939 | The Covered Trailer                       | The Covered Trailer                       | Meins, Gus                        | Gus Meins              | tt0031187 |
| 1746499893 | 1948 | 1948 | Angel on the Amazon                       | Angel on the Amazon                       | Auer, John H.                     | John H. Auer           | tt0040095 |
| 1746556009 | 1954 | 1954 | White Christmas                           | White Christmas                           | Curtiz, Michael                   | Michael Curtiz         | tt0047673 |
| 1746467987 | 1917 | 1917 | The Gentle Intruder                       | The Gentle Intruder                       | Kirkwood, James                   | James Kirkwood         | tt0007995 |
| 1746514954 | 1914 | 1914 | Your Girl and Mine: a Woman Suffrage Play | Your Girl and Mine: A Woman Suffrage Play | Warren, Giles                     | Giles Warren           | tt0004842 |
| 1746392868 | 1982 | 1982 | Tootsie                                   | Tootsie                                   | Pollack, Sydney                   | Sydney Pollack         | tt0084805 |
| 1746577171 | 1960 | 1960 | Strangers When We Meet                    | Strangers When We Meet                    | Quine, Richard                    | Richard Quine          | tt0054345 |
| 1746259111 | 1980 | 1980 | Where the Buffalo Roam                    | Where the Buffalo Roam                    | Linson, Art                       | Art Linson             | tt0081748 |
| 1746581406 | 1961 | 1961 | Fanny                                     | Fanny                                     | Logan, Joshua                     | Joshua Logan           | tt0054866 |
| 1746568172 | 1934 | 1934 | 'Neath the Arizona Skies                  | 'Neath the Arizona Skies                  | Fraser, Harry                     | Harry L. Fraser        | tt0024805 |
| 1746561976 | 1954 | 1954 | Pushover                                  | Pushover                                  | Quine, Richard                    | Richard Quine          | tt0047377 |
| 1746582937 | 1935 | 1934 | Cowboy Holiday                            | Cowboy Holiday                            | Hill, Bob                         | Robert F. Hill         | tt0025006 |
| 1746394173 | 1982 | 1982 | Dead Men Don't Wear Plaid                 | Dead Men Don't Wear Plaid                 | Reiner, Carl                      | Carl Reiner            | tt0083798 |
| 1746580987 | 1962 | 1961 | The Festival Girls                        | The Festival Girls                        | Jason, Leigh                      | Leigh Jason            | tt0053822 |
| 1746520864 | 1925 | 1925 | Alias Mary Flynn                          | Alias Mary Flynn                          | Ince, Ralph                       | Ralph Ince             | tt0015550 |
| 1746199035 | 1969 | 1969 | Hot Rod Action                            | Hot Rod Action                            | McCabe, Gene                      | Gene McCabe            | tt2807330 |
| 1746433739 | 1991 | 1991 | The Silence of the Lambs                  | The Silence of the Lambs                  | Demme, Jonathan                   | Jonathan Demme         | tt0102926 |
| 1745359879 | 2008 | 2008 | What Happens in Vegas                     | What Happens in Vegas                     | Vaughan, Tom                      | Tom Vaughan            | tt1033643 |
| 1746524319 | 1915 | 1915 | The Shooting of Dan McGrew                | The Shooting of Dan McGrew                | Blaché, Herbert                   | Herbert Blaché         | tt0006037 |
| 1746585143 | 1929 | 1929 | Strange Cargo                             | Strange Cargo                             |                                   | Benjamin Glazer        | tt0020456 |
| 1769971161 | 1970 | 1970 | Threesome                                 | Threesome                                 | Beale, Lee                        | Brandon Chase          | tt0127939 |
| 1769975282 | 1916 | 1916 | The Honor of the Road                     | The Honor of the Road                     |                                   | James W. Horne         | tt3140200 |
| 1746421258 | 1995 | 1995 | The Cure                                  | The Cure                                  | Horton, Peter                     | Peter Horton           | tt0112757 |
| 1746467627 | 1917 | 1917 | Melissa of the Hills                      | Melissa of the Hills                      | Kirkwood, James                   | James Kirkwood         | tt0125397 |
| 1746422595 | 1993 | 1993 | Last Action Hero                          | Last Action Hero                          | McTiernan, John                   | John McTiernan         | tt0107362 |
| 1746576942 | 1963 | 1963 | Blood Feast                               | Blood Feast                               | Lewis, Herschell G.               | Herschell Gordon Lewis | tt0056875 |
| 1746520151 | 1924 | 1924 | Conductor 1492                            | Conductor 1492                            | Hines, Charles; Griffin, Frank    | Frank Griffin          | tt0014797 |
| 1746504896 | 1921 | 1921 | Discontented Wives                        | Discontented Wives                        | McGowan, J. P.                    | J.P. McGowan           | tt0012110 |
| 1746582112 | 1951 | 1951 | Arizona Manhunt                           | Arizona Manhunt                           | Brannon, Fred C.                  | Fred C. Brannon        | tt0043295 |
| 1745359150 | 2003 | 2003 | Biker Boyz                                | Biker Boyz                                | Bythewood, Reggie Rock            | Reggie Rock Bythewood  | tt0326769 |
| 1746200477 | 1969 | 1969 | Nightmare in Wax                          | Nightmare in Wax                          | Townsend, Bud                     | Bud Townsend           | tt0064729 |
| 1746474409 | 1946 | 1946 | Blondie's Lucky Day                       | Blondie's Lucky Day                       | Berlin, Abby                      | Abby Berlin            | tt0038368 |
| 1746585342 | 1929 | 1929 | The Flying Marine                         | The Flying Marine                         | Rogell, Albert                    | Albert S. Rogell       | tt0019888 |
| 1745303177 | 2007 | 2007 | Fantastic Four: Rise of the Silver Surfer | Fantastic Four: Rise of the Silver Surfer | Story, Tim                        | Tim Story              | tt0486576 |
| 1746502230 | 1915 | 1915 | An Eye for an Eye                         | An Eye for an Eye                         |                                   | William Desmond Taylor | tt0005260 |
| 1746555277 | 1955 | 1955 | Daddy Long Legs                           | Daddy Long Legs                           | Negulesco, Jean                   | Jean Negulesco         | tt0047969 |
| 1769970413 | 1967 | 1967 | Professor Lust                            | Professor Lust                            | Rose, Warner                      | William Rose           | tt0242226 |
| 1746577291 | 1950 | 1950 | Prisoners in Petticoats                   | Prisoners in Petticoats                   | Ford, Philip                      | Philip Ford            | tt0127163 |
| 1745359973 | 2001 | 2000 | Jails, Hospitals & Hip-Hop                | Jails, Hospitals & Hip Hop                | Benjamin, Mark ; Hoch, Danny      | Mark Benjamin          | tt0210130 |

|            |      |      |                                     |                                     |                              |                      |           |
|------------|------|------|-------------------------------------|-------------------------------------|------------------------------|----------------------|-----------|
| 1746409331 | 1986 | 1985 | House                               | House                               | Miner, Steve                 | Steve Miner          | tt0091223 |
| 1746580794 | 1935 | 1935 | All the King's Horses               | All the King's Horses               | Tuttle, Frank                | Frank Tuttle         | tt0024823 |
| 1746500329 | 1924 | 1924 | In High Gear                        | In High Gear                        | Bradbury, Robert North       | Robert N. Bradbury   | tt0123907 |
| 1746580420 | 1935 | 1935 | The Singing Vagabond                | The Singing Vagabond                | Pierson, Carl                | Carl Pierson         | tt0028258 |
| 1746569557 | 1957 | 1956 | Revolt at Fort Laramie              | Revolt at Fort Laramie              | Selander, Lesley             | Lesley Selander      | tt0050895 |
| 1746509568 | 1923 | 1923 | Her Accidental Husband              | Her Accidental Husband              | Fitzgerald, Dallas M.        | Dallas M. Fitzgerald | tt0014126 |
| 1746585034 | 1940 | 1940 | Fugitive from a Prison Camp         | Fugitive from a Prison Camp         | Collins, Lewis D.            | Lewis D. Collins     | tt0032500 |
| 1745341474 | 2009 | 2009 | Good Hair                           | Good Hair                           | Stilson, Jeff                | Jeff Stilson         | tt1213585 |
| 1769977350 | 1977 | 1977 | Female Fever                        | Female Fever                        | Patrick, Alain               | Alain Patrick        | tt0849439 |
| 1746199997 | 1966 | 1966 | Tarzan and the Valley of Gold       | Tarzan and the Valley of Gold       | Day, Robert                  | Robert Day           | tt0061067 |
| 1746514567 | 1916 | 1916 | The Marriage Bond                   | The Marriage Bond                   | Marston, Lawrence            | Lawrence Marston     | tt0007041 |
| 1746581275 | 1960 | 1960 | Juke Box Racket                     | Juke Box Racket                     | Barris, George; Geallis, Jim | George Barris        | tt0053972 |
| 1746583569 | 1929 | 1929 | The Cock-Eyed World                 | The Cock-Eyed World                 | Walsh, Raoul                 | Raoul Walsh          | tt0019776 |
| 1745374965 | 2009 | 2009 | Transformers: Revenge of the Fallen | Transformers: Revenge of the Fallen | Bay, Michael                 | Michael Bay          | tt1055369 |
| 1746562293 | 1953 | 1953 | The Golden Blade                    | The Golden Blade                    | Juran, Nathan                | Nathan Juran         | tt0045828 |
| 1746584999 | 1940 | 1940 | Arizona Gang Busters                | Arizona Gang Busters                | Stewart, Peter               | Sam Newfield         | tt0032223 |
| 1746584272 | 1936 | 1936 | The Mandarin Mystery                | The Mandarin Mystery                | Staub, Ralph                 | Ralph Staub          | tt0029207 |
| 1746492375 | 1948 | 1948 | Larceny                             | Larceny                             | Sherman, George              | George Sherman       | tt0039550 |
| 1746420973 | 1983 | 1983 | The Man Who Loved Women             | The Man Who Loved Women             | Edwards, Blake               | Blake Edwards        | tt0085891 |
| 1746420988 | 1995 | 1995 | Judge Dredd                         | Judge Dredd                         | Cannon, Danny                | Danny Cannon         | tt0113492 |
| 1746581108 | 1960 | 1960 | Get Outta Town                      | Get Outta Town                      | Davis, Charles               | Charles Davis        | tt0179823 |
| 1746437840 | 1944 | 1944 | In the Meantime, Darling            | In the Meantime, Darling            | Preminger, Otto              | Otto Preminger       | tt0036955 |
| 1746435344 | 1996 | 1996 | Executive Decision                  | Executive Decision                  | Baird, Stuart                | Stuart Baird         | tt0116253 |
| 1746520648 | 1926 | 1927 | Racing Romance                      | Racing Romance                      | Brown, Harry J.              | Fred J. Balshofer    | tt4578182 |
| 1746508492 | 1926 | 1926 | What Happened to Jones              | What Happened to Jones              | Seiter, William A.           | William A. Seiter    | tt0017539 |
| 1746514115 | 1910 | 1910 | The Mystery of the Torn Note        | The Mystery of the Torn Note        |                              |                      | tt1080760 |
| 1746577533 | 1935 | 1935 | Silent Valley                       | Silent Valley                       | Ray, B. B.                   | Bernard B. Ray       | tt0026997 |
| 1769970446 | 1967 | 1967 | The Love Rebellion                  | The Love Rebellion                  | Sarno, Joe                   | Joseph W. Sarno      | tt0059407 |
| 1746566727 | 1932 | 1932 | Rebecca of Sunnybrook Farm          | Rebecca of Sunnybrook Farm          | Santell, Alfred              | Alfred Santell       | tt0023378 |
| 1746566913 | 1932 | 1932 | High Speed                          | High Speed                          | Lederman, D. Ross            | D. Ross Lederman     | tt0023008 |
| 1746465117 | 1944 | 1944 | Block Busters                       | Block Busters                       | Fox, Wallace                 | Wallace Fox          | tt0036650 |
| 1746440075 | 1995 | 1995 | The Jerky Boys                      | The Jerky Boys                      | Melkonian, James             | James Melkonian      | tt0110189 |
| 1746498482 | 1918 | 1918 | The Phantom Riders                  | The Phantom Riders                  | Ford, Jack                   | John Ford            | tt0009494 |
| 1746437856 | 1941 | 1941 | Footsteps in the Dark               | Footsteps in the Dark               | Bacon, Lloyd                 | Lloyd Bacon          | tt0033616 |
| 1746514813 | 1915 | 1915 | Emmy of Stork's Nest                | Emmy of Stork's Nest                | Nigh, William                | William Nigh         | tt0005243 |
| 1746209277 | 1967 | 1967 | Oddo                                | Oddo                                | Davis, Joe                   | Nick Millard         | tt0253368 |
| 1746454050 | 1944 | 1944 | The National Barn Dance             | National Barn Dance                 | Bennett, Hugh                | Hugh Bennett         | tt0037119 |
| 1746573850 | 1956 | 1956 | Jubal                               | Jubal                               | Daves, Delmer                | Delmer Daves         | tt0048233 |
| 1746393645 | 1988 | 1988 | Child's Play                        | Child's Play                        | Holland, Tom                 | Tom Holland          | tt0094862 |
| 1746569521 | 1953 | 1953 | Tarzan and the She-Devil            | Tarzan and the She Devil            | Neumann, Kurt                | Kurt Neumann         | tt0046404 |
| 1746520949 | 1949 | 1949 | Sword in the Desert                 | Sword in the Desert                 | Sherman, George              | George Sherman       | tt0041940 |
| 1746235008 | 1968 | 1968 | Stranger in Hollywood               | Stranger in Hollywood               | Slippy, Rodion               | Rodion Slippy        | tt0284520 |
| 1746574110 | 1961 | 1961 | No Return Address                   | No Return Address                   | Grattan, Alexander           | Alejandro Grattan    | tt0251302 |
| 1746184199 | 1965 | 1965 | The Tarts                           | The Tarts                           | Davis, Joe                   | Nick Millard         | tt0259040 |
| 1746467766 | 1917 | 1917 | Reaching for the Moon               | Reaching for the Moon               | Emerson, John                | John Emerson         | tt0008498 |
| 1746562108 | 1953 | 1953 | Man of Conflict                     | Man of Conflict                     | Makelim, Hal R.              | Hal R. Makelim       | tt0046039 |
| 1746577243 | 1958 | 1958 | Teacher's Pet                       | Teacher's Pet                       | Seaton, George               | George Seaton        | tt0052278 |
| 1746583451 | 1950 | 1950 | Please Believe Me                   | Please Believe Me                   | Taugog, Norman               | Norman Taugog        | tt0042848 |
| 1746566364 | 1958 | 1958 | Giant from the Unknown              | Giant from the Unknown              | Cunha, Richard E.            | Richard E. Cunha     | tt0051654 |
| 1745293143 | 2005 | 2005 | Heights                             | Heights                             | Terrio, Chris                | Chris Terrio         | tt0382073 |
| 1746420223 | 1993 | 1993 | The War Room                        | The War Room                        |                              | Chris Hegedus        | tt0108515 |
| 1746583009 | 1940 | 1940 | The Man with Nine Lives             | The Man with Nine Lives             | Grinde, Nick                 | Nick Grinde          | tt0032753 |
| 1746572227 | 1931 | 1931 | It Pays to Advertise                | It Pays to Advertise                | Tuttle, Frank                | Frank Tuttle         | tt0022006 |
| 1746501483 | 1910 | 1910 | Thou Shalt Not                      | Thou Shalt Not                      | Griffith, D. W.              | D.W. Griffith        | tt0001415 |
| 1746507776 | 1926 | 1926 | It Must Be Love                     | It Must Be Love                     | Green, Alfred E.             | Alfred E. Green      | tt0017002 |
| 1746513704 | 1923 | 1923 | The Huntress                        | The Huntress                        | Reynolds, Lynn               | John Francis Dillon  | tt0014143 |
| 1746420778 | 1993 | 1993 | Jack the Bear                       | Jack the Bear                       | Herskovitz, Marshall         | Marshall Herskovitz  | tt0107247 |

|            |      |      |                               |                               |                          |                                     |           |
|------------|------|------|-------------------------------|-------------------------------|--------------------------|-------------------------------------|-----------|
| 1746582622 | 1937 | 1937 | Some Blondes Are Dangerous    | Some Blondes Are Dangerous    | Carruth, Milton          | Milton Carruth                      | tt0029587 |
| 1746566327 | 1953 | 1953 | Thunder over the Plains       | Thunder Over the Plains       | DeToth, Andre            | André De Toth                       | tt0046426 |
| 1746483462 | 1917 | 1917 | Even As You and I             | Even As You and I             | Weber, Lois              | Lois Weber                          | tt0007902 |
| 1746578733 | 1962 | 1962 | Long Day's Journey Into Night | Long Day's Journey Into Night | Lumet, Sidney            | Sidney Lumet                        | tt0056196 |
| 1745342684 | 2009 | 2009 | The Missing Person            | The Missing Person            | Buschel, Noah            | Noah Buschel                        | tt1105512 |
| 1746582729 | 1937 | 1937 | Blossoms on Broadway          | Blossoms on Broadway          | Wallace, Richard         | Richard Wallace                     | tt0028642 |
| 1746503310 | 1922 | 1922 | The Man Who Waited            | The Man Who Waited            | Luddy, Edward I.         | Edward Ludwig                       | tt0013365 |
| 1746566286 | 1958 | 1958 | The Beast of Budapest         | The Beast of Budapest         | Jones, Harmon C.         | Harmon Jones                        | tt0051403 |
| 1769969970 | 1911 | 1911 | The Water War                 | The Water War                 |                          | Allan Dwan                          | tt0433199 |
| 1746437423 | 1942 | 1942 | Mexican Spitfire Sees a Ghost | Mexican Spitfire Sees a Ghost | Goodwins, Leslie         | Leslie Goodwins                     | tt0035059 |
| 1746256646 | 1975 | 1975 | Bucktown                      | Bucktown                      | Marks, Arthur            | Arthur Marks                        | tt0072747 |
| 1746578645 | 1958 | 1958 | Seven Guns to Mesa            | Seven Guns to Mesa            | Dein, Edward             | Edward Dein                         | tt0050953 |
| 1746514277 | 1916 | 1916 | Diane of the Follies          | Diane of the Follies          | Cabanne, William Christy | Christy Cabanne                     | tt0006592 |
| 1746577666 | 1935 | 1935 | The Woman in Red              | The Woman in Red              | Florey, Robert           | Robert Florey                       | tt0027228 |
| 1746520269 | 1926 | 1926 | The Outsider                  | The Outsider                  | Lee, Rowland V.          | Rowland V. Lee                      | tt0017240 |
| 1746410821 | 1994 | 1994 | Double Dragon                 | Double Dragon                 | Yukich, James            | James Yukich                        | tt0106761 |
| 1746583920 | 1930 | 1930 | The Bishop Murder Case        | The Bishop Murder Case        |                          | David Burton                        | tt0020695 |
| 1746437160 | 1998 | 1998 | Ronin                         | Ronin                         | Frankenheimer, John      | John Frankenheimer                  | tt0122690 |
| 1746467326 | 1917 | 1917 | The Terror                    | The Terror                    | Wells, Raymond           | Raymond Wells                       | tt0008664 |
| 1746533202 | 1927 | 1927 | Cheaters                      | Cheaters                      | Apfel, Oscar             | Oscar Apfel                         | tt0017745 |
| 1746550020 | 1955 | 1955 | The Racers                    | The Racers                    | Hathaway, Henry          | Henry Hathaway                      | tt0048531 |
| 1746542702 | 1926 | 1926 | Fort Frayne                   | Fort Frayne                   | Wilson, Ben              | Ben F. Wilson                       | tt0132978 |
| 1746566239 | 1957 | 1957 | Crime of Passion              | Crime of Passion              | Oswald, Gerd             | Gerd Oswald                         | tt0050271 |
| 1746565937 | 1953 | 1953 | Lili                          | Lili                          | Walters, Charles         | Charles Walters                     | tt0046000 |
| 1746524354 | 1916 | 1916 | The Book Agent's Romance      | The Book Agent's Romance      | Anderson, G. M.          | Gilbert M. 'Broncho Billy' Anderson | tt0419552 |
| 1746500153 | 1925 | 1925 | The Early Bird                | The Early Bird                | Hines, Charles           | Charles Hines                       | tt0015773 |
| 1746393367 | 1989 | 1989 | Black Rain                    | Black Rain                    | Scott, Ridley            | Ridley Scott                        | tt0096933 |
| 1746514385 | 1916 | 1916 | Joy and the Dragon            | Joy and the Dragon            | King, Henry              | Henry King                          | tt0006884 |
| 1746233141 | 1967 | 1967 | Surfari                       | Surfari                       | Blair, Milton            | Milton Blair                        | tt0134124 |
| 1746582692 | 1935 | 1935 | Circumstantial Evidence       | Circumstantial Evidence       | Lamont, Charles          | Charles Lamont                      | tt0026213 |
| 1746393220 | 1981 | 1981 | True Confessions              | True Confessions              | Grossbard, Ulu           | Ulu Grosbard                        | tt0083232 |
| 1746577249 | 1960 | 1960 | The Wild Ride                 | The Wild Ride                 | Berman, Harvey           | Harvey Berman                       | tt0054475 |
| 1746474398 | 1944 | 1944 | Hollywood Canteen             | Hollywood Canteen             | Daves, Delmer            | Delmer Daves                        | tt0036922 |
| 1746513868 | 1914 | 1914 | A Suspicious Wife             | A Suspicious Wife             | Frank, Alexander F.      | Alexander F. Frank                  | tt0004660 |
| 1746566510 | 1952 | 1952 | Everything I Have Is Yours    | Everything I Have Is Yours    | Leonard, Robert Z.       | Robert Z. Leonard                   | tt0044599 |
| 1746581847 | 1910 | 1910 | The Fugitive                  | The Fugitive                  | Griffith, D. W.          | D.W. Griffith                       | tt0001227 |
| 1746584179 | 1940 | 1940 | Johnny Apollo                 | Johnny Apollo                 | Hathaway, Henry          | Henry Hathaway                      | tt0032651 |
| 1746483144 | 1917 | 1917 | Little Miss Nobody            | Little Miss Nobody            | Millarde, Harry          | Harry F. Millarde                   | tt0008191 |
| 1746574537 | 1935 | 1935 | Sunset Range                  | Sunset Range                  | McCarey, Ray             | Ray McCarey                         | tt0027058 |
| 1769969547 | 1911 | 1911 | Jolly Bill of the Rocking R   | Jolly Bill of the Rocking R   |                          | Allan Dwan                          | tt0486367 |
| 1746433972 | 1996 | 1996 | The Rock                      | The Rock                      | Bay, Michael             | Michael Bay                         | tt0117500 |
| 1746476202 | 1947 | 1947 | Hoppy's Holiday               | Hoppy's Holiday               | Archainbaud, George      | George Archainbaud                  | tt0039473 |
| 1746251488 | 1977 | 1977 | Smokey and the Bandit         | Smokey and the Bandit         | Needham, Hal             | Hal Needham                         | tt0076729 |
| 1746570748 | 1933 | 1933 | Little Women                  | Little Women                  | Cukor, George            | George Cukor                        | tt0024264 |
| 1746437150 | 1997 | 1996 | Visiting Desire               | Visiting Desire               | B, Beth                  | Beth B                              | tt0118094 |
| 1746569685 | 1956 | 1956 | A Day of Fury                 | A Day of Fury                 | Jones, Harmon            | Harmon Jones                        | tt0049126 |
| 1746474962 | 1947 | 1947 | Sweet Genevieve               | Sweet Genevieve               | Dreifuss, Arthur         | Arthur Dreifuss                     | tt0039876 |
| 1746434346 | 1995 | 1995 | Mr. Holland's Opus            | Mr. Holland's Opus            | Herek, Stephen           | Stephen Herek                       | tt0113862 |
| 1746569620 | 1958 | 1958 | Curse of the Faceless Man     | Curse of the Faceless Man     | Cahn, Edward L.          | Edward L. Cahn                      | tt0051507 |
| 1746561525 | 1956 | 1956 | The Black Whip                | The Black Whip                | Warren, Charles Marquis  | Charles Marquis Warren              | tt0049015 |
| 1769969346 | 1933 | 1933 | Knee Deep in Music            | Knee Deep in Music            | Goulding, Alf            | Alfred J. Goulding                  | tt0024227 |
| 1746499842 | 1947 | 1947 | The Foxes of Harrow           | The Foxes of Harrow           | Stahl, John M.           | John M. Stahl                       | tt0039394 |
| 1746532432 | 1916 | 1916 | The Dream Girl                | The Dream Girl                | DeMille, Cecil B.        | Cecil B. DeMille                    | tt0006605 |
| 1746434283 | 1996 | 1996 | Hellraiser: Bloodline         | Hellraiser: Bloodline         | Smithee, Alan            | Kevin Yagher                        | tt0116514 |
| 1746499951 | 1945 | 1945 | Under Western Skies           | Under Western Skies           | Yarbrough, Jean          | Jean Yarbrough                      | tt0038203 |
| 1746513380 | 1914 | 1914 | Sins of the Parents           | Sins of the Parents           |                          | Ivan Abramson                       | tt0004598 |
| 1746434634 | 1999 | 1999 | Summer of Sam                 | Summer of Sam                 | Lee, Spike               | Spike Lee                           | tt0162677 |

|                   |             |             |                                                |                                                |                                    |                            |                  |
|-------------------|-------------|-------------|------------------------------------------------|------------------------------------------------|------------------------------------|----------------------------|------------------|
| 1745322670        | 2006        | 2006        | Babel                                          | Babel                                          | González Iñárritu, Alejandro       | Alejandro G. Iñárritu      | tt0449467        |
| 1746585260        | 1929        | 1929        | Gun Law                                        | Gun Law                                        | De Lacey, Robert                   | Robert De Lacey            | tt0019954        |
| 1746421585        | 1996        | 1996        | Matilda                                        | Matilda                                        | DeVito, Danny                      | Danny DeVito               | tt0117008        |
| 1746416233        | 1917        | 1917        | The Little Pirate                              | The Little Pirate                              | Wilson, Elsie Jane                 | Elsie Jane Wilson          | tt0008195        |
| 1746585010        | 1939        | 1939        | In Old Caliente                                | In Old Caliente                                | Kane, Joseph                       | Joseph Kane                | tt0031478        |
| 1746580657        | 1938        | 1938        | Three Blind Mice                               | Three Blind Mice                               | Seiter, William A.                 | William A. Seiter          | tt0030864        |
| 1746504588        | 1919        | 1919        | The Gay Old Dog                                | A Gay Old Dog                                  | Henley, Hobart                     | Hobart Henley              | tt0010158        |
| 1746514250        | 1916        | 1916        | God's Country and the Woman                    | God's Country and the Woman                    | Sturgeon, Rollin S.                | Rollin S. Sturgeon         | tt0006728        |
| 1746501318        | 1916        | 1916        | The Red Widow                                  | The Red Widow                                  | Durkin, James                      | James Durkin               | tt0007254        |
| 1746576588        | 1931        | 1931        | Fifty Fathoms Deep                             | Fifty Fathoms Deep                             | Neill, Roy William                 | Roy William Neill          | tt0021858        |
| 1746585089        | 1929        | 1929        | One Hysterical Night                           | One Hysterical Night                           | Craft, William J.                  | William James Craft        | tt0020241        |
| 1746572054        | 1931        | 1931        | A Holy Terror                                  | A Holy Terror                                  | Cummings, Irving                   | Irving Cummings            | tt0021966        |
| 1746500335        | 1924        | 1924        | Battling Mason                                 | Battling Mason                                 | Nelson, Jack; Craft, William James | William James Craft        | tt0014700        |
| 1746583230        | 1930        | 1930        | The Melody Man                                 | The Melody Man                                 | Neill, R. William                  | Roy William Neill          | tt0021136        |
| 1746577507        | 1935        | 1935        | Guard That Girl                                | Guard That Girl                                | Hillyer, Lambert                   | Lambert Hillyer            | tt0026443        |
| 1746571327        | 1934        | 1934        | Uncertain Lady                                 | Uncertain Lady                                 | Freund, Karl                       | Karl Freund                | tt0025932        |
| 1746577543        | 1937        | 1937        | Park Avenue Logger                             | Park Avenue Logger                             | Howard, David                      | David Howard               | tt0029376        |
| 1746491821        | 1946        | 1945        | Go Down, Death!                                | Go Down, Death!                                | Williams, Spencer                  | Spencer Williams           | tt0036870        |
| 1746197928        | 1968        | 1968        | The Power                                      | The Power                                      | Haskin, Byron                      | Byron Haskin               | tt0063452        |
| 1746583999        | 1935        | 1935        | Trails of the Wild                             | Trails of the Wild                             | Newfield, Sam                      | Sam Newfield               | tt0027130        |
| 1746503559        | 1918        | 1918        | The Ghosts of Yesterday                        | The Ghosts of Yesterday                        | Miller, Charles                    | Charles Miller             | tt0009106        |
| 1746218162        | 1966        | 1966        | Hawaii                                         | Hawaii                                         | Hill, George Roy                   | George Roy Hill            | tt0060491        |
| 1746550153        | 1954        | 1954        | Living It Up                                   | Living It Up                                   | Taurog, Norman                     | Norman Taurog              | tt0047184        |
| 1746580558        | 1935        | 1935        | The Night Is Young                             | The Night Is Young                             | Murphy, Dudley                     | Dudley Murphy              | tt0026775        |
| 1746569882        | 1960        | 1960        | Macumba Love                                   | Macumba Love                                   | Fowley, Douglas V.                 | Douglas Fowley             | tt0054045        |
| 1746511781        | 1922        | 1922        | Perils of the West                             | Perils of the West                             |                                    | Patrick Sylvester McGeeney | tt0008422        |
| 1746524818        | 1922        | 1922        | Hunting Big Game in Africa With Gun and Camera | Hunting Big Game in Africa with Gun and Camera |                                    | H.A. Snow                  | tt1314195        |
| 1746465172        | 1944        | 1944        | Action in Arabia                               | Action in Arabia                               | Moguy, Leonide                     | Léonide Moguy              | tt0036579        |
| 1746577306        | 1959        | 1959        | The Oregon Trail                               | The Oregon Trail                               | Fowler, Gene                       | Gene Fowler Jr.            | tt0053145        |
| 1746499945        | 1950        | 1950        | Hills of Oklahoma                              | Hills of Oklahoma                              | Springsteen, R. G.                 | R.G. Springsteen           | tt0042556        |
| 1745358080        | 2009        | 2009        | Drag Me to Hell                                | Drag Me to Hell                                | Raimi, Sam                         | Sam Raimi                  | tt1127180        |
| 1746418840        | 1940        | 1940        | West of Abilene                                | West of Abilene                                | Ceder, Ralph                       | Ralph Ceder                | tt0033249        |
| 1746564751        | 1953        | 1953        | City Beneath the Sea                           | City Beneath the Sea                           | Boetticher, Budd                   | Budd Boetticher            | tt0045630        |
| 1746235850        | 1974        | 1974        | The Groove Tube                                | The Groove Tube                                | Shapiro, Ken                       | Ken Shapiro                | tt0071583        |
| 1746420754        | 1981        | 1981        | Smokey Bites the Dust                          | Smokey Bites the Dust                          | Griffith, Charles B.               | Charles B. Griffith        | tt0083097        |
| 1746574140        | 1963        | 1963        | Beauty and the Body                            | Beauty and the Body                            | Mart, Paul                         | Paul Mart                  | tt0292962        |
| 1746500517        | 1925        | 1925        | Speed                                          | Speed                                          | Le Saint, Edward J.                | Edward LeSaint             | tt0016380        |
| 1746583437        | 1930        | 1930        | Madam Satan                                    | Madam Satan                                    | De Mille, Cecil B.                 | Cecil B. DeMille           | tt0021106        |
| 1746235307        | 1975        | 1975        | Mahogany                                       | Mahogany                                       | Gordy, Berry                       | Berry Gordy                | tt0073335        |
| 1745342065        | 2002        | 2002        | Barbershop                                     | Barbershop                                     | Story, Tim                         | Tim Story                  | tt0303714        |
| <b>1746582784</b> | <b>1938</b> | <b>1938</b> | <b>Call the Mesquiteers</b>                    | <b>Call the Mesquiteers</b>                    | <b>English, John</b>               | <b>John English</b>        | <b>tt0029962</b> |
| 1746199746        | 1968        | 1968        | Brides of Blood                                | Brides of Blood                                | Romero, Eddie; de Leon, Gerardo    | Gerardo de Leon            | tt0062758        |
| 1746433696        | 1999        | 1999        | Mumford                                        | Mumford                                        | Kasdan, Lawrence                   | Lawrence Kasdan            | tt0140397        |
| 1746554171        | 1964        | 1964        | Girlsapoppin                                   | Girlsapoppin                                   | Good, Knott                        | Knott Good                 | tt0173878        |
| 1746530698        | 1949        | 1949        | Prison Warden                                  | Prison Warden                                  | Friedman, Seymour                  | Seymour Friedman           | tt0041768        |
| 1746501872        | 1915        | 1915        | Poor Schmaltz                                  | Poor Schmaltz                                  | Ford, Hugh                         | Hugh Ford                  | tt0005911        |
| 1746249656        | 1975        | 1975        | Bite the Bullet                                | Bite the Bullet                                | Brooks, Richard                    | Richard Brooks             | tt0072705        |
| 1746574349        | 1962        | 1962        | Babes in the Woods                             | Babes in the Woods                             |                                    | A.A. Krovek                | tt0437081        |
| 1746580602        | 1938        | 1938        | My Lucky Star                                  | My Lucky Star                                  |                                    | Roy Del Ruth               | tt0030481        |
| 1745342531        | 2010        | 2010        | Inside Job                                     | Inside Job                                     | Del Ruth, Roy                      | Charles Ferguson           | tt1645089        |
| 1746520881        | 1925        | 1925        | Time, the Comedian                             | Time, the Comedian                             | Ferguson, Charles                  | Robert Z. Leonard          | tt0016435        |
| 1746577584        | 1937        | 1937        | Boy of the Streets                             | Boy of the Streets                             | Leonard, Robert Z.                 | William Nigh               | tt0029941        |
| 1746581180        | 1910        | 1910        | His New Lid                                    | His New Lid                                    | Nigh, William                      | Frank Powell               | tt0001251        |
| 1746520245        | 1924        | 1924        | Wandering Husbands                             | Wandering Husbands                             | Powell, Frank                      | William Beaudine           | tt0015468        |
| 1746561228        | 1932        | 1932        | Sunset Trail                                   | The Sunset Trail                               | Beaudine, William                  | B. Reeves Eason            | tt0023539        |
| 1746584376        | 1937        | 1937        | Ali Baba Goes to Town                          | Ali Baba Goes to Town                          | Eason, B. Reeves                   | David Butler               | tt0028566        |
| 1769970845        | 1915        | 1915        | The Call of the Sea                            | The Call of the Sea                            | Butler, David                      | Frank Montgomery           | tt1284611        |
|                   |             |             |                                                |                                                | Otto, Henry                        |                            |                  |

|            |      |      |                                |                                |                                      |                      |           |
|------------|------|------|--------------------------------|--------------------------------|--------------------------------------|----------------------|-----------|
| 1746492867 | 1944 | 1944 | Hidden Valley Outlaws          | Hidden Valley Outlaws          | Bretherton, Howard                   | Howard Bretherton    | tt0036918 |
| 1746502709 | 1915 | 1915 | The Battle Cry of Peace        | The Battle Cry of Peace        | North, Wilfred                       | J. Stuart Blackton   | tt0004942 |
| 1746580394 | 1934 | 1934 | A Man's Game                   | A Man's Game                   | Lederman, D. Ross                    | D. Ross Lederman     | tt0025460 |
| 1746494129 | 1910 | 1910 | The Road to Happiness          | The Road to Happiness          |                                      |                      | tt0348736 |
| 1746562089 | 1955 | 1955 | East of Eden                   | East of Eden                   | Kazan, Elia                          | Elia Kazan           | tt0048028 |
| 1746520416 | 1926 | 1925 | Typhoon Love                   | Typhoon Love                   | Dawn, Norman                         | Norman Dawn          | tt0175269 |
| 1746438209 | 1943 | 1943 | The Man from Down Under        | The Man from Down Under        | Leonard, Robert Z.                   | Robert Z. Leonard    | tt0031612 |
| 1746496067 | 1917 | 1917 | One Hour                       | One Hour                       | McAllister, Paul; Hollywood, Edwin I | Edwin L. Hollywood   | tt0008387 |
| 1746217208 | 1966 | 1966 | Birds Do It                    | Birds Do It                    | Marton, Andrew                       | Andrew Marton        | tt0060169 |
| 1746565213 | 1952 | 1952 | Hiawatha                       | Hiawatha                       | Neumann, Kurt                        | Kurt Neumann         | tt0044705 |
| 1746530793 | 1950 | 1950 | Beyond the Purple Hills        | Beyond the Purple Hills        | English, John                        | John English         | tt0042244 |
| 1746499998 | 1924 | 1924 | Open All Night                 | Open All Night                 | Bern, Paul                           | Paul Bern            | tt0015200 |
| 1746584208 | 1935 | 1935 | One More Spring                | One More Spring                | King, Henry                          | Henry King           | tt0026822 |
| 1746503614 | 1917 | 1917 | The Spirit of '76              | The Spirit of '76              | Montgomery, Frank                    | George Siegmann      | tt0182444 |
| 1746520953 | 1950 | 1950 | Killer Shark                   | Killer Shark                   | Boetticher, Oscar                    | Budd Boetticher      | tt0042642 |
| 1746422322 | 1940 | 1940 | Ladies Must Live               | Ladies Must Live               | Smith, Noel                          | Noel M. Smith        | tt0032684 |
| 1746474990 | 1947 | 1947 | The Lone Wolf in London        | The Lone Wolf in London        | Goodwins, Leslie                     | Leslie Goodwins      | tt0039579 |
| 1746169541 | 1910 | 1910 | Abraham Lincoln's Clemency     | Abraham Lincoln's Clemency     | Wharton, Theodore                    | Theodore Wharton     | tt0001101 |
| 1746582120 | 1950 | 1950 | Rock Island Trail              | Rock Island Trail              | Kane, Joseph                         | Joseph Kane          | tt0041816 |
| 1746424241 | 1941 | 1941 | Redhead                        | Redhead                        | Cahn, Edward                         | Edward L. Cahn       | tt0034087 |
| 1746520211 | 1949 | 1949 | The Pilgrimage Play            | The Pilgrimage Play            | Strayer, Frank                       | Frank R. Strayer     | tt0282842 |
| 1746582694 | 1936 | 1937 | Play! Girls                    | Play! Girls                    | Graham, Walter                       | Walter Graham        | tt0328264 |
| 1746486348 | 1919 | 1919 | Home                           | Home                           | Weber, Lois                          | Lois Weber           | tt0010261 |
| 1746509421 | 1926 | 1926 | The Gay Deceiver               | The Gay Deceiver               | Stahl, John M.                       | John M. Stahl        | tt0016913 |
| 1746515860 | 1921 | 1921 | Under Western Skies            | Under Western Skies            | Martin, George                       | George Martin        | tt0175279 |
| 1746501865 | 1910 | 1910 | Settled Out of Court           | Settled Out of Court           |                                      |                      | tt1376449 |
| 1746577636 | 1938 | 1938 | Marie Antoinette               | Marie Antoinette               | Van Dyke, W. S.                      | W.S. Van Dyke        | tt0030418 |
| 1745342058 | 2004 | 2004 | A Home at the End of the World | A Home at the End of the World | Mayer, Michael                       | Michael Mayer        | tt0359423 |
| 1746555598 | 1956 | 1956 | Beyond a Reasonable Doubt      | Beyond a Reasonable Doubt      | Lang, Fritz                          | Fritz Lang           | tt0049006 |
| 1746410734 | 1994 | 1994 | Little Big League              | Little Big League              | Scheinman, Andrew                    | Andrew Scheinman     | tt0110363 |
| 1746512756 | 1914 | 1914 | An Odyssey of the North        | An Odyssey of the North        | Bosworth, Hobart                     | Hobart Bosworth      | tt0004415 |
| 1746580621 | 1936 | 1936 | Happy Go Lucky                 | Happy Go Lucky                 | Scotto, Aubrey                       | Aubrey Scotto        | tt0027718 |
| 1746513425 | 1915 | 1915 | Stop Thief!                    | Stop Thief!                    | Fitzmaurice, George                  | George Fitzmaurice   | tt0006104 |
| 1746485278 | 1918 | 1918 | A Petticoat Pilot              | A Petticoat Pilot              | Sturgeon, Rollin S.                  | Rollin S. Sturgeon   | tt0009492 |
| 1746567248 | 1933 | 1933 | Her Bodyguard                  | Her Bodyguard                  | Beaudine, William                    | William Beaudine     | tt0024107 |
| 1746582713 | 1938 | 1938 | Highway Patrol                 | Highway Patrol                 | Coleman, C. C.                       | Charles C. Coleman   | tt0030234 |
| 1746409692 | 1991 | 1991 | Popcorn                        | Popcorn                        | Herrier, Mark                        | Mark Herrier         | tt0102690 |
| 1746465164 | 1946 | 1946 | If I'm Lucky                   | If I'm Lucky                   | Seiler, Lewis                        | Lewis Seiler         | tt0038632 |
| 1746503932 | 1921 | 1921 | Straight Is the Way            | Straight Is the Way            | Vignola, Robert G.                   | Robert G. Vignola    | tt0012728 |
| 1746532997 | 1915 | 1915 | The Iron Strain                | The Iron Strain                | Barker, Reginald                     | Reginald Barker      | tt0005553 |
| 1745302732 | 2007 | 2007 | Ocean's Thirteen               | Ocean's Thirteen               | Soderbergh, Steven                   | Steven Soderbergh    | tt0496806 |
| 1746464849 | 1941 | 1941 | Double Cross                   | Double Cross                   | Kelley, Albert                       | Albert H. Kelley     | tt0033547 |
| 1746566287 | 1956 | 1955 | The Cockleshell Heroes         | The Cockleshell Heroes         | Ferrer, José                         | José Ferrer          | tt0049083 |
| 1746503966 | 1918 | 1918 | Fame and Fortune               | Fame and Fortune               | Reynolds, Lynn F.                    | Lynn Reynolds        | tt0009053 |
| 1746580519 | 1936 | 1936 | The Return of Jimmy Valentine  | The Return of Jimmy Valentine  | Collins, Lewis D.                    | Lewis D. Collins     | tt0028171 |
| 1746437913 | 1942 | 1942 | Bullet Scars                   | Bullet Scars                   | Lederman, D. Ross                    | D. Ross Lederman     | tt0034555 |
| 1745342484 | 2002 | 2002 | The Scorpion King              | The Scorpion King              | Russell, Chuck                       | Chuck Russell        | tt0277296 |
| 1745272748 | 2000 | 2000 | Mission: Impossible II         | Mission: Impossible II         | Woo, John                            | John Woo             | tt0120755 |
| 1746582563 | 1938 | 1938 | There's That Woman Again       | There's That Woman Again       | Hall, Alexander                      | Alexander Hall       | tt0032017 |
| 1746500247 | 1949 | 1949 | Ma and Pa Kettle               | Ma and Pa Kettle               | Lamont, Charles                      | Charles Lamont       | tt0041613 |
| 1746583687 | 1930 | 1930 | Hide-Out                       | Hide Out                       | Barker, Reginald                     | Reginald Barker      | tt0020971 |
| 1746585471 | 1940 | 1940 | Millionaires in Prison         | Millionaires in Prison         | McCarey, Ray                         | Ray McCarey          | tt0032796 |
| 1746500432 | 1926 | 1926 | Under Western Skies            | Under Western Skies            | Sedgwick, Edward                     | Edward Sedgwick      | tt0017497 |
| 1746393957 | 1992 | 1992 | Medicine Man                   | Medicine Man                   | McTiernan, John                      | John McTiernan       | tt0104839 |
| 1746465000 | 1942 | 1942 | Jesse James, Jr.               | Jesse James, Jr.               | Sherman, George                      | George Sherman       | tt0034915 |
| 1746454473 | 1945 | 1945 | Too Young to Know              | Too Young to Know              | Cordova, Frederick de                | Frederick De Cordova | tt0038179 |
| 1746503732 | 1920 | 1920 | The Dream Cheater              | The Dream Cheater              | Warde, Ernest C.                     | Ernest C. Warde      | tt0011135 |

|            |      |      |                                         |                                         |                                 |                      |           |
|------------|------|------|-----------------------------------------|-----------------------------------------|---------------------------------|----------------------|-----------|
| 1746257428 | 1976 | 1975 | The Adventures of the Wilderness Family | The Adventures of the Wilderness Family | Raffill, Stewart                | Stewart Raffill      | tt0072610 |
| 1746512920 | 1927 | 1926 | The General                             | The General                             | Keaton, Buster; Bruckman, Clyde | Clyde Bruckman       | tt0017925 |
| 1746497850 | 1919 | 1919 | The Hornet's Nest                       | Hornet's Nest                           | Young, James                    | James Young          | tt0010270 |
| 1746497561 | 1918 | 1918 | The Forbidden City                      | The Forbidden City                      | Franklin, Sidney A.             | Sidney Franklin      | tt0009086 |
| 1746453626 | 1942 | 1942 | My Heart Belongs to Daddy               | My Heart Belongs to Daddy               | Siodmak, Robert                 | Robert Siodmak       | tt0035104 |
| 1746410176 | 1992 | 1992 | The Last of the Mohicans                | The Last of the Mohicans                | Mann, Michael                   | Michael Mann         | tt0104691 |
| 1746585147 | 1929 | 1929 | The Black Watch                         | The Black Watch                         | Ford, John                      | John Ford            | tt0019699 |
| 1746566156 | 1957 | 1957 | The Lawless Eighties                    | The Lawless Eighties                    | Kane, Joe                       | Joseph Kane          | tt0050627 |
| 1745358648 | 2003 | 2002 | 7th Street                              | 7th Street                              | Pais, Josh                      | Josh Pais            | tt0362390 |
| 1746569627 | 1956 | 1956 | The Mountain                            | The Mountain                            | Dmytryk, Edward                 | Edward Dmytryk       | tt0049523 |
| 1746577403 | 1962 | 1962 | If a Man Answers                        | If a Man Answers                        | Levin, Henry                    | Henry Levin          | tt0056093 |
| 1746453589 | 1944 | 1944 | The Princess and the Pirate             | The Princess and the Pirate             | Butler, David                   | David Butler         | tt0037193 |
| 1746435584 | 1943 | 1943 | Girls in Chains                         | Girls in Chains                         | Ulmer, Edgar G.                 | Edgar G. Ulmer       | tt0035944 |
| 1746508431 | 1923 | 1923 | His Children's Children                 | His Children's Children                 | Wood, Sam                       | Sam Wood             | tt0014134 |
| 1746211085 | 1973 | 1973 | Schlock                                 | Schlock                                 | Landis, John                    | John Landis          | tt0067716 |
| 1746234363 | 1966 | 1966 | Murderers' Row                          | Murderers' Row                          | Levin, Henry                    | Henry Levin          | tt0060728 |
| 1746555538 | 1954 | 1954 | The Outlaw Stallion                     | The Outlaw Stallion                     | Sears, Fred F.                  | Fred F. Sears        | tt0047321 |
| 1746492584 | 1946 | 1946 | Drifting Along                          | Drifting Along                          | Abrahams, Derwin M.             | Derwin Abrahams      | tt0038496 |
| 1746197960 | 1968 | 1968 | The Road Hustlers                       | The Road Hustlers                       | Jackson, Larry E.               | Larry E. Jackson     | tt0063512 |
| 1746523087 | 1915 | 1915 | Simon, the Jester                       | Simon, the Jester                       | José, Edward                    | Edward José          | tt0006048 |
| 1746485155 | 1918 | 1918 | The Romance of Tarzan                   | The Romance of Tarzan                   | Lucas, Wilfred                  | Wilfred Lucas        | tt0009560 |
| 1746464827 | 1942 | 1942 | Jacaré                                  | Jacaré                                  | Ford, Charles E.                | Charles E. Ford      | tt0034908 |
| 1746553550 | 1964 | 1964 | Panic Button                            | Panic Button                            | Sherman, George                 | George Sherman       | tt0058446 |
| 1746474514 | 1945 | 1945 | Sing Your Way Home                      | Sing Your Way Home                      | Mann, Anthony                   | Anthony Mann         | tt0038091 |
| 1746578610 | 1960 | 1960 | Tormented                               | Tormented                               | Gordon, Bert I.                 | Bert I. Gordon       | tt0054393 |
| 1746578556 | 1961 | 1961 | The Police Dog Story                    | Police Dog Story                        | Cahn, Edward L.                 | Edward L. Cahn       | tt0055316 |
| 1746454084 | 1942 | 1942 | Trail Riders                            | Trail Riders                            | Tansey, Robert                  | Robert Emmett Tansey | tt0035464 |
| 1746503002 | 1928 | 1928 | Man-Made Women                          | Man Made Women                          | Stein, Paul L.                  | Paul L. Stein        | tt0019135 |
| 1746576486 | 1931 | 1930 | The Devil's Cabaret                     | The Devil's Cabaret                     | Grindé, Nick                    | Nick Grinde          | tt0022817 |
| 1746580633 | 1938 | 1938 | The Beloved Brat                        | The Beloved Brat                        | Lubin, Arthur                   | Arthur Lubin         | tt0029906 |
| 1746569507 | 1953 | 1953 | The Glass Wall                          | The Glass Wall                          | Shane, Maxwell                  | Maxwell Shane        | tt0045824 |
| 1746515574 | 1920 | 1920 | Food for Scandal                        | Food for Scandal                        | Cruze, James                    | James Cruze          | tt0012180 |
| 1746577149 | 1959 | 1959 | The Last Blitzkrieg                     | The Last Blitzkrieg                     | Dreifuss, Arthur                | Arthur Dreifuss      | tt0051844 |
| 1746575017 | 1936 | 1936 | The First Baby                          | The First Baby                          | Seiler, Lewis                   | Lewis Seiler         | tt0027621 |
| 1746420151 | 1987 | 1987 | Prince of Darkness                      | Prince of Darkness                      | Carpenter, John                 | John Carpenter       | tt0093777 |
| 1746584599 | 1930 | 1930 | Ingagi                                  | Ingagi                                  |                                 | William Campbell     | tt0164686 |
| 1746555335 | 1954 | 1954 | Prince Valiant                          | Prince Valiant                          | Hathaway, Henry                 | Henry Hathaway       | tt0047365 |
| 1746571530 | 1932 | 1932 | Bird of Paradise                        | Bird of Paradise                        | Vidor, King                     | King Vidor           | tt0022689 |
| 1746567319 | 1952 | 1952 | Tarzan's Savage Fury                    | Tarzan's Savage Fury                    | Endfield, Cyril                 | Cy Endfield          | tt0045220 |
| 1746566761 | 1933 | 1933 | Her First Mate                          | Her First Mate                          | Wylar, William                  | William Wylar        | tt0024109 |
| 1746585446 | 1939 | 1939 | Rio                                     | Rio                                     | Brahm, John                     | John Brahm           | tt0031863 |
| 1746584246 | 1936 | 1936 | And So They Were Married                | And So They Were Married                | Nugent, Elliott                 | Elliott Nugent       | tt0027293 |
| 1746503865 | 1922 | 1922 | Rounding Up the Law                     | Rounding Up the Law                     | Seeling, Charles R.             | Charles R. Seeling   | tt0013562 |
| 1746566142 | 1956 | 1956 | The Kettles in the Ozarks               | The Kettles in the Ozarks               | Lamont, Charles                 | Charles Lamont       | tt0049404 |
| 1746579054 | 1963 | 1963 | 55 Days at Peking                       | 55 Days at Peking                       | Ray, Nicholas                   | Nicholas Ray         | tt0056800 |
| 1746565994 | 1953 | 1953 | Man in the Attic                        | Man in the Attic                        | Fregonese, Hugo                 | Hugo Fregonese       | tt0047209 |
| 1746574710 | 1936 | 1936 | Navy Born                               | Navy Born                               | Watt, Nate                      | Nate Watt            | tt0028023 |
| 1746424460 | 1940 | 1940 | King of the Lumberjacks                 | King of the Lumberjacks                 | Clemens, William                | William Clemens      | tt0032668 |
| 1746420092 | 1994 | 1994 | The Getaway                             | The Getaway                             | Donaldson, Roger                | Roger Donaldson      | tt0109890 |
| 1746570865 | 1934 | 1934 | No Ransom                               | No Ransom                               | Newmeyer, Fred                  | Fred C. Newmeyer     | tt0025573 |
| 1746574057 | 1959 | 1959 | Face of a Fugitive                      | Face of a Fugitive                      | Wendkos, Paul                   | Paul Wendkos         | tt0052794 |
| 1746424387 | 1943 | 1943 | Hostages                                | Hostages                                | Tuttle, Frank                   | Frank Tuttle         | tt0036017 |
| 1769970464 | 1967 | 1967 | Venus in Furs                           | Venus in Furs                           | Marzano, Joe                    | Joseph Marzano       | tt0062434 |
| 1746581624 | 1928 | 1928 | Branding Fire                           | Branding Fire                           |                                 | Ben F. Wilson        | tt0301068 |
| 1746424587 | 1940 | 1940 | In Old Missouri                         | In Old Missouri                         | McDonald, Frank                 | Frank McDonald       | tt0032629 |
| 1746513049 | 1914 | 1914 | The Tigress                             | The Tigress                             |                                 | Alice Guy            | tt0004706 |
| 1746508752 | 1925 | 1925 | Two Fisted Thompson                     | Two Fisted Thompson                     |                                 | W. Adcock            | tt0174296 |



|            |      |      |                             |                             |                                     |                        |           |
|------------|------|------|-----------------------------|-----------------------------|-------------------------------------|------------------------|-----------|
| 1746583501 | 1928 | 1928 | The Docks of New York       | The Docks of New York       | Sternberg, Josef von                | Josef von Sternberg    | tt0018839 |
| 1746577943 | 1937 | 1937 | The Last Gangster           | The Last Gangster           | Ludwig, Edward                      | Edward Ludwig          | tt0029118 |
| 1746408673 | 1981 | 1981 | Deadly Blessing             | Deadly Blessing             | Craven, Wes                         | Wes Craven             | tt0082245 |
| 1746218860 | 1978 | 1978 | Hi-Riders                   | Hi Riders                   | Clark, Greydon                      | Greydon Clark          | tt0076140 |
| 1746524707 | 1927 | 1927 | The Broadway Drifter        | The Broadway Drifter        | McEveety, Bernard                   | Bernard McEveety       | tt0017701 |
| 1746465413 | 1944 | 1944 | She's a Sweetheart          | She's a Sweetheart          | Lord, Del                           | Del Lord               | tt0037269 |
| 1746524854 | 1923 | 1923 | Mary of the Movies          | Mary of the Movies          | McDermott, John                     | John McDermott         | tt0014262 |
| 1746524386 | 1927 | 1927 | When Danger Calls           | When Danger Calls           | Hutchison, Charles                  | Charles Hutchison      | tt0018563 |
| 1746500296 | 1925 | 1925 | The Dressmaker From Paris   | The Dressmaker from Paris   | Bern, Paul                          | Paul Bern              | tt0015765 |
| 1746580386 | 1939 | 1939 | S.O.S. -Tidal Wave          | S.O.S. Tidal Wave           | Auer, John H.                       | John H. Auer           | tt0031886 |
| 1746554116 | 1964 | 1964 | Bullet for a Badman         | Bullet for a Badman         | Springsteen, R. G.                  | R.G. Springsteen       | tt0057905 |
| 1746575076 | 1933 | 1933 | The Masquerader             | The Masquerader             | Wallace, Richard                    | Richard Wallace        | tt0024308 |
| 1746500018 | 1924 | 1924 | Sagebrush Gospel            | Sagebrush Gospel            | Hatton, Richard                     | Dick Hatton            | tt0159719 |
| 1746433719 | 1999 | 1999 | Friends & Lovers            | Friends & Lovers            | Haas, George                        | George Haas            | tt0143261 |
| 1746570388 | 1934 | 1934 | A Wicked Woman              | A Wicked Woman              | Brabin, Charles                     | Charles Brabin         | tt0025989 |
| 1746497509 | 1920 | 1920 | The Soul of Youth           | The Soul of Youth           | Taylor, William D.                  | William Desmond Taylor | tt0011721 |
| 1746496865 | 1918 | 1917 | Parentage                   | Parentage                   | Henley, Hobart                      | Hobart Henley          | tt0161907 |
| 1746582590 | 1936 | 1936 | The Texas Rangers           | The Texas Rangers           | Vidor, King                         | King Vidor             | tt0028352 |
| 1746474980 | 1944 | 1944 | Trigger Trail               | Trigger Trail               | Collins, Lewis D.                   | Lewis D. Collins       | tt0037398 |
| 1746516278 | 1920 | 1921 | Below the Deadline          | Below the Deadline          | McGowan, J. P.                      | J.P. McGowan           | tt0011959 |
| 1746219033 | 1973 | 1973 | Pat Garrett & Billy the Kid | Pat Garrett & Billy the Kid | Peckinpah, Sam                      | Sam Peckinpah          | tt0070518 |
| 1746235233 | 1973 | 1973 | Sleeper                     | Sleeper                     | Allen, Woody                        | Woody Allen            | tt0070707 |
| 1745293897 | 2007 | 2007 | Mr. Untouchable             | Mr. Untouchable             | Levin, Marc                         | Marc Levin             | tt1086340 |
| 1746570243 | 1934 | 1934 | Let's Talk It Over          | Let's Talk It Over          | Neumann, Kurt                       | Kurt Neumann           | tt0025154 |
| 1746475897 | 1946 | 1946 | Her Sister's Secret         | Her Sister's Secret         | Ulmer, Edgar G.                     | Edgar G. Ulmer         | tt0038598 |
| 1746542637 | 1924 | 1924 | Romance of the Wasteland    | Romance of the Wasteland    |                                     | Victor Adamson         | tt0015287 |
| 1746573892 | 1958 | 1958 | Fort Massacre               | Fort Massacre               | Newman, Joseph M.                   | Joseph M. Newman       | tt0051629 |
| 1746419790 | 1990 | 1990 | Jacob's Ladder              | Jacob's Ladder              | Lyne, Adrian                        | Adrian Lyne            | tt0099871 |
| 1746577834 | 1938 | 1938 | Western Trails              | Western Trails              | Waggner, George                     | George Waggner         | tt0030961 |
| 1746216714 | 1966 | 1966 | Let's Kill Uncle            | Let's Kill Uncle            | Castle, William                     | William Castle         | tt0060626 |
| 1746574103 | 1959 | 1959 | Ask Any Girl                | Ask Any Girl                | Walters, Charles                    | Charles Walters        | tt0052583 |
| 2007987181 | 1922 | 1922 | Silas Marner                | Silas Marner                | Donovan, Frank P.; Donovan, Frank F | Frank P. Donovan       | tt0163234 |
| 1746503771 | 1919 | 1919 | Love and the Law            | Love and the Law            | Lewis, Edgar                        | Edgar Lewis            | tt0191256 |
| 1746585190 | 1930 | 1930 | The Mounted Stranger        | The Mounted Stranger        | Rosson, Arthur                      | Arthur Rosson          | tt0021161 |
| 1746464810 | 1943 | 1943 | Tonight We Raid Calais      | Tonight We Raid Calais      | Brahm, John                         | John Brahm             | tt0036449 |
| 1746567025 | 1932 | 1932 | The Fourth Horseman         | The Fourth Horseman         | MacFadden, Hamilton                 | Hamilton MacFadden     | tt0022909 |
| 1746464795 | 1944 | 1944 | Meet the People             | Meet the People             | Riesner, Charles                    | Charles Reisner        | tt0037062 |
| 1746420969 | 1989 | 1989 | Tango & Cash                | Tango & Cash                | Konchalovsky, Andrei                | Andrei Konchalovskiy   | tt0098439 |
| 1746500116 | 1948 | 1948 | Night Wind                  | Night Wind                  | Tinling, James                      | James Tinling          | tt0040645 |
| 1746503524 | 1921 | 1921 | Sheltered Daughters         | Sheltered Daughters         | Dillon, Edward                      | Edward Dillon          | tt0012676 |
| 1769970440 | 1966 | 1966 | Male Service                | Male Service                | Hudson, Arch                        | Arch Hudson            | tt0243401 |
| 1746550285 | 1954 | 1954 | Jivaro                      | Jivaro                      | Ludwig, Edward                      | Edward Ludwig          | tt0047133 |
| 1746577662 | 1933 | 1933 | War of the Range            | War of the Range            | McGowan, J. P.                      | J.P. McGowan           | tt0024752 |
| 1746409074 | 1988 | 1988 | Lady in White               | Lady in White               | LaLoggia, Frank                     | Frank LaLoggia         | tt0095484 |
| 1746574007 | 1958 | 1958 | Spy in the Sky!             | Spy in the Sky!             | Wilder, W. Lee                      | W. Lee Wilder          | tt0144620 |
| 1746423290 | 1991 | 1991 | Frankie and Johnny          | Frankie and Johnny          | Marshall, Garry                     | Garry Marshall         | tt0101912 |
| 1746437981 | 1941 | 1941 | Highway West                | Highway West                | McGann, William                     | William C. McGann      | tt0033718 |
| 1746503291 | 1919 | 1919 | The Bluffer                 | The Bluffer                 | Vale, Travers                       | Travers Vale           | tt0009941 |
| 1746562006 | 1957 | 1957 | The Prince and the Showgirl | The Prince and the Showgirl | Olivier, Laurence                   | Laurence Olivier       | tt0050861 |
| 1746497656 | 1922 | 1922 | Wild Honey                  | Wild Honey                  | Ruggles, Wesley                     | Wesley Ruggles         | tt0013766 |
| 1746514837 | 1922 | 1922 | The Game Chicken            | A Game Chicken              | Franklin, Chester M.                | Chester M. Franklin    | tt0013162 |
| 1746393628 | 1986 | 1986 | King Kong Lives             | King Kong Lives             | Guillermin, John                    | John Guillermin        | tt0091344 |
| 1746578532 | 1959 | 1959 | On the Beach                | On the Beach                | Kramer, Stanley                     | Stanley Kramer         | tt0053137 |
| 1746408881 | 1989 | 1989 | Uncle Buck                  | Uncle Buck                  | Hughes, John                        | John Hughes            | tt0098554 |
| 1746500250 | 1924 | 1924 | Wages of Virtue             | Wages of Virtue             |                                     | Allan Dwan             | tt0015465 |
| 1746520439 | 1924 | 1924 | Waterfront Wolves           | Waterfront Wolves           |                                     | Tom Gibson             | tt0015472 |
| 1746580398 | 1937 | 1937 | Trouble in Texas            | Trouble in Texas            | Gibson, Tom<br>Bradbury, R. N.      | Robert N. Bradbury     | tt0029694 |

|                   |             |             |                                            |                                            |                       |                         |                  |
|-------------------|-------------|-------------|--------------------------------------------|--------------------------------------------|-----------------------|-------------------------|------------------|
| 1746508130        | 1925        | 1925        | The Light of Western Stars                 | The Light of Western Stars                 | Howard, William K.    | William K. Howard       | tt0016021        |
| 1746499872        | 1948        | 1948        | The Search                                 | The Search                                 | Zinnemann, Fred       | Fred Zinnemann          | tt0040765        |
| 1746584997        | 1939        | 1939        | The Man They Could Not Hang                | The Man They Could Not Hang                | Grinde, Nick          | Nick Grinde             | tt0031614        |
| 1746437173        | 1998        | 1997        | Mrs. Dalloway                              | Mrs Dalloway                               | Gorris, Marleen       | Marleen Gorris          | tt0119723        |
| 1746579052        | 1961        | 1961        | The Little Shepherd of Kingdom Come        | The Little Shepherd of Kingdom Come        | McLaglen, Andrew V.   | Andrew V. McLaglen      | tt0055091        |
| 1746423532        | 1940        | 1940        | Prairie Law                                | Prairie Law                                | Howard, David         | David Howard            | tt0032939        |
| 1746570730        | 1934        | 1934        | 6 Day Bike Rider                           | 6 Day Bike Rider                           | Bacon, Lloyd          | Lloyd Bacon             | tt0024809        |
| 1746582521        | 1935        | 1935        | The Vanishing Riders                       | The Vanishing Riders                       | Hill, Bob             | Robert F. Hill          | tt0027167        |
| 1769976189        | 1927        | 1927        | Listen Lena                                | Listen Lena                                | Beauchamp, Clem       | Clem Beauchamp          | tt0249734        |
| 1746565926        | 1955        | 1955        | Guys and Dolls                             | Guys and Dolls                             | Mankiewicz, Joseph L. | Joseph L. Mankiewicz    | tt0048140        |
| 1746578039        | 1939        | 1939        | The Cat and the Canary                     | The Cat and the Canary                     | Nugent, Elliott       | Elliott Nugent          | tt0031143        |
| 1746580514        | 1937        | 1937        | Black Aces                                 | Black Aces                                 | Jones, Buck           | Buck Jones              | tt0028635        |
| 1746211242        | 1971        | 1971        | Preacherman                                | Preacherman                                | Viola, Albert T.      | Albert T. Viola         | tt0067606        |
| 1746555596        | 1954        | 1954        | Garden of Evil                             | Garden of Evil                             | Hathaway, Henry       | Henry Hathaway          | tt0047013        |
| 1769969991        | 1912        | 1912        | O'Brien's Busy Day                         | O'Brien's Busy Day                         |                       | Otis Turner             | tt0339462        |
| 1746574922        | 1937        | 1936        | That Girl from Paris                       | That Girl from Paris                       | Jason, Leigh          | Leigh Jason             | tt0028354        |
| 1746524381        | 1914        | 1914        | A Florida Enchantment                      | A Florida Enchantment                      | Drew, Sidney          | Sidney Drew             | tt0003973        |
| 1746580203        | 1935        | 1935        | Storm over the Andes                       | Storm Over the Andes                       | Cabanne, Christy      | Christy Cabanne         | tt0027046        |
| 1746577453        | 1962        | 1962        | State Fair                                 | State Fair                                 | Ferrer, José          | José Ferrer             | tt0056526        |
| 1746570816        | 1934        | 1934        | Sadie McKee                                | Sadie McKee                                | Brown, Clarence       | Clarence Brown          | tt0025740        |
| 1746454758        | 1997        | 1997        | Dante's Peak                               | Dante's Peak                               | Donaldson, Roger      | Roger Donaldson         | tt0118928        |
| 1746454489        | 1942        | 1941        | Kathleen                                   | Kathleen                                   | Bucquet, Harold S.    | Harold S. Bucquet       | tt0033780        |
| 1746497075        | 1919        | 1919        | When My Ship Comes in                      | When My Ship Comes In                      | Thornby, Robert T.    | Robert Thornby          | tt0135051        |
| 1769976176        | 1928        | 1928        | Spook Spoofing                             | Spook Spoofing                             | McGowan, Robert       | Robert F. McGowan       | tt0234787        |
| 1746393308        | 1981        | 1981        | The Prowler                                | The Prowler                                | Zito, Joseph          | Joseph Zito             | tt0082951        |
| 1746217906        | 1966        | 1966        | You're a Big Boy Now                       | You're a Big Boy Now                       | Coppola, Francis Ford | Francis Ford Coppola    | tt0061209        |
| 1746503279        | 1919        | 1918        | The Son-of-A-Gun!                          | Son of a Gun                               | Robbins, Jesse J.     | F. Richard Jones        | tt1341269        |
| 1746553706        | 1964        | 1964        | Muscle Beach Party                         | Muscle Beach Party                         | Asher, William        | William Asher           | tt0058384        |
| 1745293721        | 2007        | 2007        | Confessions of a Superhero                 | Confessions of a Superhero                 | Ogens, Matt           | Matthew Ogens           | tt1016164        |
| 1746218330        | 1965        | 1965        | The Slender Thread                         | The Slender Thread                         | Pollack, Sydney       | Sydney Pollack          | tt0059729        |
| 1746473705        | 1947        | 1947        | Rainbow Over the Rockies                   | Rainbow Over the Rockies                   | Drake, Oliver         | Oliver Drake            | tt0163171        |
| 1746419795        | 1987        | 1987        | Programmed to Kill                         | Programmed to Kill                         | Holzman, Allan        | Allan Holzman           | tt0093790        |
| 1746511737        | 1923        | 1922        | Shifting Sands                             | Shifting Sands                             | Granville, Fred Leroy | Fred LeRoy Granville    | tt0014462        |
| 1746500407        | 1926        | 1926        | The Fighting Edge                          | The Fighting Edge                          | Lehrman, Henry        | Henry Lehrman           | tt0016860        |
| 1746578844        | 1962        | 1961        | The Devil's Messenger                      | The Devil's Messenger                      | Strock, Herbert L.    | Herbert L. Strock       | tt0054807        |
| 1745372622        | 2002        | 2002        | Star Wars Episode II: Attack of the Clones | Star Wars: Episode II Attack of the Clones | Lucas, George         | George Lucas            | tt0121765        |
| 1746500678        | 1927        | 1928        | The Riddle Trail                           | The Riddle Trail                           |                       |                         | tt0339584        |
| 1746198923        | 1967        | 1967        | Woman Times Seven                          | Woman Times Seven                          | De Sica, Vittorio     | Vittorio De Sica        | tt0062502        |
| 1746507837        | 1949        | 1949        | Massacre River                             | Massacre River                             | Rawlins, John         | John Rawlins            | tt0041643        |
| 1746436210        | 1992        | 1992        | Unlawful Entry                             | Unlawful Entry                             | Kaplan, Jonathan      | Jonathan Kaplan         | tt0105699        |
| 1746512624        | 1927        | 1927        | The Irresistible Lover                     | The Irresistible Lover                     | Beaudine, William     | William Beaudine        | tt0018029        |
| 1746433780        | 1997        | 1997        | Rhyme & Reason                             | Rhyme & Reason                             | Spirer, Peter         | Peter Spirer            | tt0120014        |
| 1746582227        | 1931        | 1931        | The Squaw Man                              | The Squaw Man                              | DeMille, Cecil B.     | Cecil B. DeMille        | tt0022428        |
| 1746581875        | 1928        | 1928        | Tracy the Outlaw                           | Tracy the Outlaw                           | Thayer, Otis B.       | Otis Thayer             | tt0171839        |
| 1746216886        | 1968        | 1968        | Fever Heat                                 | Fever Heat                                 | Doughten, Russell S.  | Russell S. Doughten Jr. | tt0061660        |
| 1746497219        | 1919        | 1919        | The Price Woman Pays                       | The Price Woman Pays                       | Terwilliger, George   | George Terwilliger      | tt0010586        |
| 1746496998        | 1918        | 1918        | Borrowed Clothes                           | Borrowed Clothes                           | Weber, Lois           | Lois Weber              | tt0008913        |
| 1746584575        | 1928        | 1928        | The Gate Crasher                           | The Gate Crasher                           | Craft, William James  | William James Craft     | tt0018928        |
| 1746423046        | 1994        | 1994        | Mary Shelley's Frankenstein                | Mary Shelley's Frankenstein                | Branagh, Kenneth      | Kenneth Branagh         | tt0109836        |
| 1746585176        | 1929        | 1929        | Come Across                                | Come Across                                | Taylor, Ray           | Ray Taylor              | tt0019783        |
| <b>1746554319</b> | <b>1965</b> | <b>1965</b> | <b>A Swingin' Summer</b>                   | <b>A Swingin' Summer</b>                   | <b>Sparr, Robert</b>  | <b>Robert Sparr</b>     | <b>tt0059771</b> |
| 1746574289        | 1963        | 1963        | Palm Springs Weekend                       | Palm Springs Weekend                       | Taurog, Norman        | Norman Taurog           | tt0057396        |
| 1746501313        | 1923        | 1922        | Making a Man                               | Making a Man                               | Henabery, Joseph      | Joseph Henabery         | tt0132296        |
| 1746585398        | 1939        | 1939        | Laugh It Off                               | Laugh It Off                               | Rogell, Albert S.     | Albert S. Rogell        | tt0031555        |
| 1746580807        | 1935        | 1935        | Red Hot Tires                              | Red Hot Tires                              | Lederman, D. Ross     | D. Ross Lederman        | tt0026917        |
| 1746508208        | 1927        | 1927        | Three Miles Up                             | Three Miles Up                             | Mitchell, Bruce       | Bruce Mitchell          | tt0018483        |
| 1745282865        | 2007        | 2007        | Pride                                      | Pride                                      | Gonera, Sunu          | Sunu Gonera             | tt0475355        |

|            |      |      |                                 |                                 |                                   |                    |           |
|------------|------|------|---------------------------------|---------------------------------|-----------------------------------|--------------------|-----------|
| 1745395414 | 2009 | 2009 | Star Trek                       | Star Trek                       | Abrams, J. J.                     | J.J. Abrams        | tt0796366 |
| 1746438966 | 1944 | 1944 | Ministry of Fear                | Ministry of Fear                | Lang, Fritz                       | Fritz Lang         | tt0037075 |
| 1746234222 | 1968 | 1968 | Angels From Hell                | Angels from Hell                | Kessler, Bruce                    | Bruce Kessler      | tt0062669 |
| 1746409993 | 1987 | 1987 | 84 Charing Cross Road           | 84 Charing Cross Road           | Jones, David                      | David Hugh Jones   | tt0090570 |
| 1746423020 | 1993 | 1993 | Manhattan Murder Mystery        | Manhattan Murder Mystery        | Allen, Woody                      | Woody Allen        | tt0107507 |
| 1746520050 | 1924 | 1924 | Empty Hearts                    | Empty Hearts                    | Santell, Al                       | Alfred Santell     | tt0014867 |
| 1746566141 | 1953 | 1953 | The Robe                        | The Robe                        | Koster, Henry                     | Henry Koster       | tt0046247 |
| 1746574490 | 1934 | 1934 | The Cat and the Fiddle          | The Cat and the Fiddle          | Howard, William K.                | William K. Howard  | tt0024960 |
| 1746520191 | 1926 | 1926 | The Magician                    | The Magician                    | Ingram, Rex                       | Rex Ingram         | tt0017103 |
| 1746500251 | 1948 | 1947 | The Pearl                       | The Pearl                       | Fernández, Emilio                 | Emilio Fernández   | tt0037981 |
| 1746569978 | 1959 | 1959 | Night of the Quarter Moon       | Night of the Quarter Moon       | Haas, Hugo                        | Hugo Haas          | tt0053113 |
| 1746464900 | 1946 | 1945 | The Sailor Takes a Wife         | The Sailor Takes a Wife         | Whorf, Richard                    | Richard Whorf      | tt0038045 |
| 1746566083 | 1958 | 1958 | This Is Russia                  | This Is Russia!                 |                                   | Sid Feder          | tt0051075 |
| 1746487946 | 1918 | 1918 | The Risky Road                  | The Risky Road                  | Park, Ida May                     | Ida May Park       | tt0009554 |
| 1746524603 | 1928 | 1928 | Ladies' Night in a Turkish Bath | Ladies' Night in a Turkish Bath | Cline, Edward                     | Edward F. Cline    | tt0019064 |
| 1746578781 | 1963 | 1963 | Thunder Island                  | Thunder Island                  | Leewood, Jack                     | Jack Leewood       | tt0057582 |
| 1746580729 | 1936 | 1936 | Boulder Dam                     | Boulder Dam                     | McDonald, Frank                   | Frank McDonald     | tt0027391 |
| 1746420147 | 1987 | 1987 | From the Hip                    | From the Hip                    | Clark, Bob                        | Bob Clark          | tt0093051 |
| 1746577384 | 1951 | 1951 | Blue Blood                      | Blue Blood                      | Landers, Lew                      | Lew Landers        | tt0043349 |
| 1746583779 | 1930 | 1930 | The Cat Creeps                  | The Cat Creeps                  | Julian, Rupert                    | Rupert Julian      | tt0020748 |
| 1746567811 | 1932 | 1932 | The All American                | The All American                | Mack, Russell                     | Russell Mack       | tt0022620 |
| 1746580431 | 1936 | 1936 | Cavalcade of the West           | Cavalcade of the West           | Fraser, Harry                     | Harry L. Fraser    | tt0027434 |
| 1746209474 | 1968 | 1968 | Ice Station Zebra               | Ice Station Zebra               | Sturges, John                     | John Sturges       | tt0063121 |
| 1746577550 | 1937 | 1937 | That's My Story                 | That's My Story!                | Salkow, Sidney                    | Sidney Salkow      | tt0029653 |
| 1746582819 | 1937 | 1937 | Alcatraz Island                 | Alcatraz Island                 | McGann, William                   | William C. McGann  | tt0028564 |
| 1746235642 | 1974 | 1973 | Badlands                        | Badlands                        | Malick, Terrence                  | Terrence Malick    | tt0069762 |
| 1746574870 | 1935 | 1935 | I Live My Life                  | I Live My Life                  | Van Dyke, W. S.                   | W.S. Van Dyke      | tt0026417 |
| 1746507604 | 1926 | 1926 | A Horse on Broadway             | A Horse on Broadway             | Mattison, Frank S.                |                    | tt0356702 |
| 1746455778 | 1997 | 1997 | Murder at 1600                  | Murder at 1600                  | Little, Dwight                    | Dwight H. Little   | tt0119731 |
| 1746514406 | 1916 | 1916 | The Kid                         | The Kid                         | North, Wilfrid                    | Wilfrid North      | tt0163036 |
| 1746487577 | 1919 | 1919 | The Profiteers                  | The Profiteer                   | Fitzmaurice, George               | John K. Holbrook   | tt0010594 |
| 1745358685 | 2002 | 2002 | The Kid Stays in the Picture    | The Kid Stays in the Picture    | Morgen, Brett ; Burstein, Nanette | Nanette Burstein   | tt0039353 |
| 1746584350 | 1939 | 1939 | Stunt Pilot                     | Stunt Pilot                     | Waggner, George                   | George Waggner     | tt0031989 |
| 1746465231 | 1942 | 1942 | Crossroads                      | Crossroads                      | Conway, Jack                      | Jack Conway        | tt0034622 |
| 1746524315 | 1916 | 1916 | Broken Fetters                  | Broken Fetters                  | Ingram, Rex                       | Rex Ingram         | tt0006470 |
| 1746454301 | 1943 | 1943 | Slightly Dangerous              | Slightly Dangerous              | Ruggles, Wesley                   | Wesley Ruggles     | tt0036365 |
| 1746424436 | 1943 | 1943 | Old Acquaintance                | Old Acquaintance                | Sherman, Vincent                  | Vincent Sherman    | tt0036230 |
| 1746561088 | 1932 | 1932 | The Kid from Spain              | The Kid from Spain              | McCarey, Leo                      | Leo McCarey        | tt0023088 |
| 1746424205 | 1941 | 1941 | Charley's Aunt                  | Charley's Aunt                  | Mayo, Archie; Rosenberg, Aaron    | Archie Mayo        | tt0033457 |
| 1745358978 | 2008 | 2008 | Rambo                           | Rambo                           | Stallone, Sylvester               | Sylvester Stallone | tt0462499 |
| 1746436350 | 1943 | 1943 | Hi Diddle Diddle                | Hi Diddle Diddle                | Stone, Andrew L.                  | Andrew L. Stone    | tt0035996 |
| 1746524503 | 1915 | 1915 | A Texas Steer                   | A Texas Steer                   | Warren, Giles R.                  | Giles Warren       | tt0006144 |
| 1746577984 | 1937 | 1937 | Hold 'Em Navy!                  | Hold 'Em Navy                   | Neumann, Kurt                     | Kurt Neumann       | tt0029008 |
| 1746578784 | 1963 | 1963 | Violent Midnight                | Violent Midnight                | Hilliard, Richard                 | Richard Hilliard   | tt0057434 |
| 1746504164 | 1921 | 1921 | Jesse James as the Outlaw       | Jesse James as the Outlaw       | Coates, Franklin B.               | Franklin B. Coates | tt0135482 |
| 1746501410 | 1910 | 1910 | Young Deer's Return             | Young Deer's Return             |                                   | Fred J. Balshofer  | tt0360222 |
| 1745357937 | 2002 | 2002 | High Crimes                     | High Crimes                     | Franklin, Carl                    | Carl Franklin      | tt0257756 |
| 1746584554 | 1928 | 1928 | Crashing Through                | Crashing Through                | Buckingham, Thomas                | Tom Buckingham     | tt0018802 |
| 1746475257 | 1947 | 1947 | Blondie's Anniversary           | Blondie's Anniversary           | Berlin, Abby                      | Abby Berlin        | tt0039201 |
| 1746515565 | 1917 | 1917 | Stagestruck                     | Stage Struck                    | Morrisey, Edward                  | Edward Morrissey   | tt0138832 |
| 1746585243 | 1929 | 1929 | River of Romance                | The River of Romance            | Wallace, Richard                  | Richard Wallace    | tt0020334 |
| 1746500373 | 1927 | 1927 | Slightly Used                   | Slightly Used                   | Mayo, Archie L.                   | Archie Mayo        | tt0018414 |
| 1746438439 | 1942 | 1942 | Wrecking Crew                   | Wrecking Crew                   | MacDonald, Frank                  | Frank McDonald     | tt0035569 |
| 1746584804 | 1928 | 1928 | Arizona Days                    | Arizona Days                    | McGowan, J. P.                    | J.P. McGowan       | tt0018654 |
| 1746584753 | 1928 | 1928 | Freedom of the Press            | Freedom of the Press            | Melford, George                   | George Melford     | tt0018917 |
| 1746476194 | 1944 | 1944 | Andy Hardy's Blonde Trouble     | Andy Hardy's Blonde Trouble     | Seitz, George B.                  | George B. Seitz    | tt0036602 |
| 1746433755 | 1997 | 1997 | Critical Care                   | Critical Care                   | Lumet, Sidney                     | Sidney Lumet       | tt0118901 |

|                   |             |             |                                            |                                           |                                  |                         |                  |
|-------------------|-------------|-------------|--------------------------------------------|-------------------------------------------|----------------------------------|-------------------------|------------------|
| 1746502212        | 1917        | 1917        | Hell Morgan's Girl                         | Tell Morgan's Girl                        | De Grasse, Joseph                | Louis Chaudet           | tt0332771        |
| 1746581347        | 1910        | 1910        | The Further Adventures of the Girl Spy     | The Further Adventures of the Girl Spy    | Olcott, Sidney                   | Sidney Olcott           | tt0397435        |
| 1746581940        | 1951        | 1951        | Footlight Varieties                        | Footlight Varieties                       | Yates, Hal                       | D.W. Griffith           | tt0043551        |
| 1746423442        | 1941        | 1941        | Double Trouble                             | Double Trouble                            | West, William                    | William West            | tt0033549        |
| 1746491794        | 1948        | 1948        | Saigon                                     | Saigon                                    | Fenton, Leslie                   | Leslie Fenton           | tt0040753        |
| 1746465362        | 1947        | 1947        | Road to Rio                                | Road to Rio                               | McLeod, Norman Z.                | Norman Z. McLeod        | tt0039776        |
| 1769969817        | 1912        | 1912        | The Letter with the Black Seals            | The Letter with the Black Seals           |                                  | Étienne Arnaud          | tt0002304        |
| 1745374182        | 2002        | 2002        | Drumline                                   | Drumline                                  | Stone, Charles                   | Charles Stone III       | tt0303933        |
| 1746509193        | 1925        | 1925        | Starlight, the Untamed                     | Starlight, the Untamed                    | Webb, Harry                      | Harry S. Webb           | tt0166821        |
| 1746473902        | 1942        | 1942        | Boston Blackie Goes Hollywood              | Boston Blackie Goes Hollywood             | Gordon, Michael                  | Michael Gordon          | tt0034545        |
| 1746409030        | 1987        | 1987        | Raising Arizona                            | Raising Arizona                           | Coen, Joel                       | Joel Coen               | tt0093822        |
| 1746219604        | 1973        | 1973        | The Laughing Policeman                     | The Laughing Policeman                    | Rosenberg, Stuart                | Stuart Rosenberg        | tt0070292        |
| 1746497074        | 1918        | 1918        | Treasure of the Sea                        | The Treasure of the Sea                   | Reicher, Frank                   | Frank Reicher           | tt0009722        |
| 1746560662        | 1932        | 1932        | This Reckless Age                          | This Reckless Age                         | Tuttle, Frank                    | Frank Tuttle            | tt0023380        |
| 1745373533        | 2002        | 2001        | The Believer                               | The Believer                              | Bean, Henry                      | Henry Bean              | tt0247199        |
| 1746485173        | 1918        | 1917        | Sauce for the Goose                        | Sauce for the Goose                       | Edwards, Walter                  | Al Christie             | tt0759682        |
| 1746580559        | 1937        | 1937        | This Is My Affair                          | This Is My Affair                         | Seiter, William A.               | William A. Seiter       | tt0029662        |
| 1746582869        | 1935        | 1935        | The Silent Code                            | The Silent Code                           | Paton, Stuart                    | Stuart Paton            | tt0240897        |
| 1746578032        | 1938        | 1938        | Youth Takes a Fling                        | Youth Takes a Fling                       | Mayo, Archie                     | Archie Mayo             | tt0031003        |
| 1746524886        | 1916        | 1916        | Miss George Washington                     | Miss George Washington                    | Dawley, J. Searle                | J. Searle Dawley        | tt0007074        |
| 1746465402        | 1947        | 1947        | The Adventures of Don Coyote               | The Adventures of Don Coyote              | LeBorg, Reginald                 | Reginald Le Borg        | tt0039134        |
| 1746577652        | 1935        | 1935        | Frisco Kid                                 | Frisco Kid                                | Bacon, Lloyd                     | Lloyd Bacon             | tt0026385        |
| 1746509577        | 1924        | 1924        | Bluff                                      | Bluff                                     | Wood, Sam                        | Sam Wood                | tt0014725        |
| 1745309516        | 2007        | 2007        | The Final Season                           | The Final Season                          | Evans, David Mickey              | David Mickey Evans      | tt0449018        |
| 1746486174        | 1919        | 1919        | Mind the Paint Girl                        | The Mind the Paint Girl                   | North, Wilfrid                   | Wilfrid North           | tt0010464        |
| 1746465048        | 1947        | 1947        | New Orleans                                | New Orleans                               | Lubin, Arthur                    | Arthur Lubin            | tt0039655        |
| 1769970463        | 1966        | 1966        | The House of Cats                          | The House of Cats                         |                                  | Arch Hudson             | tt0220539        |
| 1746508892        | 1926        | 1926        | Sin Cargo                                  | Sin Cargo                                 | Gasnier, Louis J.                | Louis J. Gasnier        | tt0017395        |
| 1745373505        | 2008        | 2008        | Street Kings                               | Street Kings                              | Ayer, David                      | David Ayer              | tt0421073        |
| 1746507582        | 1949        | 1949        | Arctic Fury                                | Arctic Fury                               | Dawn, Norman; Feitshans, Fred R. | Norman Dawn             | tt0041131        |
| 1746410852        | 1994        | 1994        | Clear and Present Danger                   | Clear and Present Danger                  | Noyce, Phillip                   | Phillip Noyce           | tt0109444        |
| 1746582753        | 1937        | 1937        | Varsity Show                               | Varsity Show                              | Keighley, William                | William Keighley        | tt0029725        |
| 1746566278        | 1953        | 1953        | Prisoners of the Casbah                    | Prisoners of the Casbah                   | Bare, Richard                    | Richard L. Bare         | tt0046209        |
| 1746437133        | 2000        | 2000        | Men of Honor                               | Men of Honor                              | Tillman, George                  | George Tillman Jr.      | tt0203019        |
| 1745340492        | 2003        | 2003        | Final Destination 2                        | Final Destination 2                       | Ellis, David R.                  | David R. Ellis          | tt0309593        |
| 1746573645        | 1931        | 1931        | Sporting Blood                             | Sporting Blood                            | Brabin, Charles                  | Charles Brabin          | tt0022425        |
| 1746523473        | 1923        | 1923        | Shell Shocked Sammy                        | Shell Shocked Sammy                       | Mattison, Frank S.               | Frank S. Mattison       | tt0163829        |
| 1769970018        | 1911        | 1911        | Falsely Accused                            | Falsely Accused                           |                                  | Thomas H. Ince          | tt0358469        |
| 1746197966        | 1966        | 1966        | How to Steal a Million                     | How to Steal a Million                    | Wylar, William                   | William Wylar           | tt0060522        |
| 1746569826        | 1960        | 1960        | The Little Shop of Horrors                 | The Little Shop of Horrors                | Corman, Roger                    | Roger Corman            | tt0054033        |
| 1746409702        | 1986        | 1986        | Under the Cherry Moon                      | Under the Cherry Moon                     | Prince                           | Prince                  | tt0092133        |
| 1746560871        | 1932        | 1932        | Sinister Hands                             | Sinister Hands                            | Schaefer, Armand                 | Armand Schaefer         | tt0023478        |
| 1746585449        | 1940        | 1940        | Jennie                                     | Jennie                                    | Burton, David                    | David Burton            | tt0032648        |
| 1746584460        | 1930        | 1930        | Sweet Mama                                 | Sweet Mama                                | Cline, Edward                    | Edward F. Cline         | tt0021440        |
| 1746422529        | 1998        | 1998        | Patch Adams                                | Patch Adams                               | Shadyac, Tom                     | Tom Shadyac             | tt0129290        |
| 1746501325        | 1916        | 1916        | The Crucial Test                           | The Crucial Test                          | Thornby, Robert; Ince, John      | John Ince               | tt0006558        |
| 1746198460        | 1968        | 1968        | How To Save a Marriage--And Ruin Your Life | How to Save a Marriage and Ruin Your Life | Cook, Fielder                    | Fielder Cook            | tt0063102        |
| 1746567987        | 1933        | 1933        | The Mysterious Rider                       | The Mysterious Rider                      | Allen, Fred                      | Fred Allen              | tt0024366        |
| 1746567775        | 1933        | 1933        | It's Great to Be Alive                     | It's Great to Be Alive                    | Werker, Alfred                   | Alfred L. Werker        | tt0024189        |
| <b>1769969371</b> | <b>1965</b> | <b>1965</b> | <b>The Secret Society</b>                  | <b>The Secret Society</b>                 | <b>Johnsen, S. N.</b>            | <b>Sande N. Johnsen</b> | <b>tt0138084</b> |
| 1746508391        | 1925        | 1925        | The Knockout Kid                           | The Knockout Kid                          | Rogell, Albert                   | Albert S. Rogell        | tt0126372        |
| 1746465275        | 1944        | 1944        | The Seventh Cross                          | The Seventh Cross                         | Zinnemann, Fred                  | Fred Zinnemann          | tt0037263        |
| 1745342187        | 2002        | 2002        | About Schmidt                              | About Schmidt                             | Payne, Alexander                 | Alexander Payne         | tt0257360        |
| 1746560459        | 1932        | 1932        | Lena Rivers                                | Lena Rivers                               | Rosen, Phil                      | Phil Rosen              | tt0023128        |
| 1746570829        | 1933        | 1933        | The Dude Bandit                            | The Dude Bandit                           | Melford, George                  | George Melford          | tt0023970        |
| 1746235390        | 1980        | 1980        | Ordinary People                            | Ordinary People                           | Redford, Robert                  | Robert Redford          | tt0081283        |
| 1746250818        | 1977        | 1977        | Valentino                                  | Valentino                                 | Russell, Ken                     | Ken Russell             | tt0076868        |

|            |      |      |                                     |                                     |                                |                     |           |
|------------|------|------|-------------------------------------|-------------------------------------|--------------------------------|---------------------|-----------|
| 1746465420 | 1946 | 1946 | Ding Dong Williams                  | Ding Dong Williams                  | Berke, William                 | William Berke       | tt0038479 |
| 1746514424 | 1915 | 1915 | Life Without Soul                   | Life Without Soul                   | Smiley, Joseph W.              | Joseph W. Smiley    | tt0005615 |
| 1746474508 | 1947 | 1947 | The Pilgrim Lady                    | The Pilgrim Lady                    | Selander, Lesley               | Lesley Selander     | tt0039707 |
| 1746571830 | 1931 | 1931 | The Secret Call                     | The Secret Call                     | Walker, Stuart                 | Stuart Walker       | tt0022355 |
| 1746513180 | 1923 | 1923 | The White Sister                    | The White Sister                    | King, Henry                    | Henry King          | tt0014605 |
| 1746217967 | 1968 | 1968 | The Legend of Lylah Clare           | The Legend of Lylah Clare           | Aldrich, Robert                | Robert Aldrich      | tt0063219 |
| 1746573954 | 1960 | 1960 | This Rebel Breed                    | This Rebel Breed                    | Bare, Richard L.               | Richard L. Bare     | tt0054381 |
| 1746514230 | 1915 | 1915 | The Primrose Path                   | The Primrose Path                   | Marston, Theodore              | Lawrence Marston    | tt0005927 |
| 1746574944 | 1936 | 1936 | Come Closer, Folks                  | Come Closer, Folks                  | Lederman, D. Ross              | D. Ross Lederman    | tt0027458 |
| 1746560534 | 1932 | 1932 | Swing High                          | Swing High                          | Cummings, Jack                 | Jack Cummings       | tt0152771 |
| 1746572276 | 1910 | 1910 | The District Attorney's Triumph     | The District Attorney's Triumph     |                                |                     | tt0348588 |
| 1746584930 | 1940 | 1940 | You Can't Fool Your Wife            | You Can't Fool Your Wife            | McCarey, Ray                   | Ray McCarey         | tt0033279 |
| 1746573921 | 1956 | 1956 | A Kiss Before Dying                 | A Kiss Before Dying                 | Oswald, Gerd                   | Gerd Oswald         | tt0049414 |
| 1746465108 | 1942 | 1942 | Shadows on the Sage                 | Shadows on the Sage                 | Orlebeck, Les                  | Lester Orlebeck     | tt0035311 |
| 1746555172 | 1955 | 1954 | The Green Buddha                    | The Green Buddha                    | Lemont, John                   | John Lemont         | tt0048135 |
| 1746217860 | 1967 | 1967 | Gunfight in Abilene                 | Gunfight in Abilene                 | Hale, William                  | William Hale        | tt0061738 |
| 1746577318 | 1959 | 1959 | The Hangman                         | The Hangman                         | Curtiz, Michael                | Michael Curtiz      | tt0052877 |
| 1746575891 | 1931 | 1931 | Beyond Victory                      | Beyond Victory                      | Robertson, John                | John S. Robertson   | tt0021656 |
| 1746569812 | 1956 | 1956 | Lum and Abner Abroad                | Lum and Abner Abroad                | Kern, James V.                 | James V. Kern       | tt0049454 |
| 1746572041 | 1931 | 1931 | Delicious                           | Delicious                           | Butler, David                  | David Butler        | tt0021793 |
| 1746567320 | 1934 | 1934 | The Lucky Texan                     | The Lucky Texan                     | Bradbury, Robert N.            | Robert N. Bradbury  | tt0025440 |
| 1746584389 | 1936 | 1936 | Don't Get Personal                  | Don't Get Personal                  | Nigh, William                  | Charles Lamont      | tt0027535 |
| 1745309186 | 2005 | 2005 | Ellie Parker                        | Ellie Parker                        | Coffey, Scott                  | Scott Coffey        | tt0436262 |
| 1746516476 | 1920 | 1920 | The Law of the Yukon                | The Law of the Yukon                | Miller, Charles                | Charles Miller      | tt0011390 |
| 1746219344 | 1976 | 1976 | The Next Man                        | The Next Man                        | Sarafian, Richard C.           | Richard C. Sarafian | tt0074962 |
| 1746410177 | 1992 | 1992 | Passenger 57                        | Passenger 57                        | Hooks, Kevin                   | Kevin Hooks         | tt0105104 |
| 1746499840 | 1945 | 1945 | Pillow to Post                      | Pillow to Post                      | Sherman, Vincent               | Vincent Sherman     | tt0037990 |
| 1745302257 | 2007 | 2007 | Girl 27                             | Girl 27                             | Stenn, David                   | David Stenn         | tt0912586 |
| 1746581708 | 1910 | 1910 | How Rastus Gets His Turkey          | How Rastus Gets His Turkey          |                                | Theodore Wharton    | tt0135462 |
| 1746578725 | 1958 | 1957 | All Mine to Give                    | All Mine to Give                    | Reisner, Allen                 | Allen Reisner       | tt0050112 |
| 1746419977 | 1993 | 1993 | Needful Things                      | Needful Things                      | Heston, Fraser C.              | Fraser C. Heston    | tt0107665 |
| 1746523550 | 1914 | 1914 | Paid in Full                        | Paid in Full                        | Thomas, Augustus               | Augustus E. Thomas  | tt0004451 |
| 1746498342 | 1917 | 1917 | Sunshine and Gold                   | Sunshine and Gold                   | King, Henry                    | Henry King          | tt0008644 |
| 1746533047 | 1915 | 1915 | A Man's Prerogative                 | A Man's Prerogative                 | Nichols, George                | George Nichols      | tt0005711 |
| 1746509282 | 1924 | 1924 | Wanderer of the Wasteland           | Wanderer of the Wasteland           | Willat, Irvin                  | Irvin Willat        | tt0015467 |
| 1769970597 | 1968 | 1969 | The Love Clinic                     | The Love Clinic                     | Sebastian, Ferdinand           | Ferd Sebastian      | tt0241684 |
| 1746408842 | 1990 | 1990 | Roger Corman's Frankenstein Unbound | Roger Corman's Frankenstein Unbound | Corman, Roger                  | Roger Corman        | tt0099612 |
| 1746580375 | 1936 | 1936 | California Mail                     | California Mail                     | Smith, Noel                    | Noel M. Smith       | tt0027414 |
| 1746574752 | 1934 | 1934 | Thunder over Texas                  | Thunder Over Texas                  | Warner [Edgar G. Ulmer], John  | Edgar G. Ulmer      | tt0025891 |
| 1746210774 | 1972 | 1972 | Portnoy's Complaint                 | Portnoy's Complaint                 | Lehman, Ernest                 | Ernest Lehman       | tt0069112 |
| 1746574323 | 1961 | 1961 | Parrish                             | Parrish                             | Daves, Delmer                  | Delmer Daves        | tt0055279 |
| 1746566103 | 1958 | 1958 | Invisible Avenger                   | Invisible Avenger                   | Howe, James Wong; Sledge, John | James Wong Howe     | tt0051783 |
| 1746585374 | 1939 | 1939 | Water Rustlers                      | Water Rustlers                      | Diege, Samuel                  | Samuel Diege        | tt0032112 |
| 1746495602 | 1917 | 1917 | The Argyle Case                     | The Argyle Case                     | Ince, Ralph W.                 | Ralph Ince          | tt0007649 |
| 1746497852 | 1918 | 1918 | The Magic Eye                       | The Magic Eye                       | Berger, Rea                    | Rae Berger          | tt0009332 |
| 1746524059 | 1913 | 1913 | The Girl of the Sunny South         | The Girl of the Sunny South         |                                | Travers Vale        | tt0002901 |
| 1746483903 | 1917 | 1917 | Sylvia of the Secret Service        | Sylvia of the Secret Service        | Fitzmaurice, George            | George Fitzmaurice  | tt0145508 |
| 1746566842 | 1933 | 1933 | The Silk Express                    | The Silk Express                    | Enright, Ray                   | Ray Enright         | tt0024559 |
| 1746571005 | 1933 | 1933 | The Circus Queen Murder             | The Circus Queen Murder             | Neill, Roy William             | Roy William Neill   | tt0023893 |
| 1745293365 | 2007 | 2007 | Joshua                              | Joshua                              | Ratliff, George                | George Ratliff      | tt0808331 |
| 1746568022 | 1933 | 1933 | Employee's Entrance                 | Employees' Entrance                 | Del Ruth, Roy                  | Roy Del Ruth        | tt0023986 |
| 1746500668 | 1926 | 1926 | Ten Nights in a Barroom             | Ten Nights in a Barroom             |                                | Roy Calnek          | tt0139641 |
| 1746496579 | 1921 | 1921 | The Plaything of Broadway           | The Plaything of Broadway           | Dillon, Jack                   | John Francis Dillon | tt0012573 |
| 1746235100 | 1976 | 1976 | Obsession                           | Obsession                           | De Palma, Brian                | Brian De Palma      | tt0074991 |
| 1746576864 | 1932 | 1932 | Riders of the Desert                | Riders of the Desert                | Bradbury, Robert N.            | Robert N. Bradbury  | tt0023399 |
| 1746562449 | 1957 | 1957 | Interlude                           | Interlude                           | Sirk, Douglas                  | Douglas Sirk        | tt0050544 |
| 1746500317 | 1925 | 1925 | Playing With Souls                  | Playing with Souls                  | Ince, Ralph                    | Ralph Ince          | tt0016228 |

|                   |             |             |                                 |                                 |                                 |                    |                  |
|-------------------|-------------|-------------|---------------------------------|---------------------------------|---------------------------------|--------------------|------------------|
| 1746583435        | 1929        | 1929        | Navy Blues                      | Navy Blues                      | Brown, Clarence                 | Clarence Brown     | tt0020210        |
| 1746455309        | 1999        | 1999        | trick                           | Dick                            | Fall, Jim                       | Andrew Fleming     | tt0144168        |
| 1746520610        | 1949        | 1949        | The Set-Up                      | The Set Up                      | Wise, Robert                    | Robert Wise        | tt0041859        |
| 1746573211        | 1932        | 1931        | Prestige                        | Prestige                        | Garnett, Tay                    | Tay Garnett        | tt0023352        |
| 1746272119        | 1966        | 1965        | Sting of Death                  | Sting of Death                  | Grefé, William                  | William Grefé      | tt0059756        |
| 1746420843        | 1940        | 1940        | Village Barn Dance              | Village Barn Dance              | McDonald, Frank                 | Frank McDonald     | tt0033223        |
| 1746513428        | 1915        | 1915        | The Secret Orchard              | The Secret Orchard              | Reicher, Frank                  | Frank Reicher      | tt0006017        |
| 1745341829        | 2001        | 2001        | How High                        | How High                        | Dylan, Jesse                    | Jesse Dylan        | tt0278488        |
| 1746577573        | 1937        | 1937        | She Loved a Fireman             | She Loved a Fireman             | Farrow, John                    | John Farrow        | tt0030739        |
| 1746475762        | 1948        | 1948        | Casbah                          | Casbah                          | Berry, John                     | John Berry         | tt0040214        |
| 1746566282        | 1954        | 1953        | Beat the Devil                  | Beat the Devil                  | Huston, John                    | John Huston        | tt0046414        |
| 1746520690        | 1949        | 1949        | Alias the Champ                 | Alias the Champ                 | Blair, George                   | George Blair       | tt0041108        |
| 1746420139        | 1983        | 1984        | Almonds and Raisins             | Almonds and Raisins             | Karel, Russ                     | David Elstein      | tt0086875        |
| 1746502038        | 1916        | 1916        | Her Debt of Honor               | Her Debt of Honor               | Nigh, William                   | William Nigh       | tt0006787        |
| 1769972678        | 1963        | 1963        | Hollywood Nudes Report          | Hollywood Nudes Report          | Mahon, Barry                    | Barry Mahon        | tt0291246        |
| 1746501750        | 1910        | 1910        | The Woman in the Case           | A Woman in the Case             |                                 | William F. Haddock | tt2239170        |
| 1746581351        | 1910        | 1910        | Her Terrible Peril              | Her Terrible Peril              | Balshofer, Fred J.              | Fred J. Balshofer  | tt0358513        |
| 1746435864        | 1995        | 1995        | Boys On the Side                | Boys on the Side                | Ross, Herbert                   | Herbert Ross       | tt0112571        |
| 1746515066        | 1921        | 1921        | The Blazing Trail               | The Blazing Trail               | Thornby, Robert                 | Robert Thornby     | tt0011977        |
| 1746582715        | 1936        | 1936        | Rose of the Rancho              | Rose of the Rancho              | Gering, Marion                  | Marion Gering      | tt0028208        |
| 1746454474        | 1943        | 1943        | Bombardier                      | Bombardier                      | Wallace, Richard                | Richard Wallace    | tt0035689        |
| 1745374752        | 2010        | 2010        | Ticked-Off Trannies with Knives | Ticked Off Trannies with Knives | Luna, Israel                    | Israel Luna        | tt1587431        |
| 1745358984        | 2009        | 2009        | Orphan                          | Orphan                          | Collet-Serra, Jaime             | Jaume Collet       | tt1148204        |
| 1746569975        | 1958        | 1958        | Man of the West                 | Man of the West                 | Mann, Anthony                   | Anthony Mann       | tt0051899        |
| 1746492220        | 1948        | 1948        | Million Dollar Weekend          | Million Dollar Weekend          | Raymond, Gene                   | Gene Raymond       | tt0040590        |
| 1746577682        | 1935        | 1935        | Cappy Ricks Returns             | Cappy Ricks Returns             | Wright, Mack                    | Mack V. Wright     | tt0026173        |
| 1746492561        | 1945        | 1945        | Wagon Wheels Westward           | Wagon Wheels Westward           | Springsteen, R. G.              | R.G. Springsteen   | tt0038234        |
| 1746209436        | 1968        | 1968        | Mondo Daytona                   | Mondo Daytona                   | Willard, Frank                  | Frank Willard      | tt0188910        |
| 1746475936        | 1948        | 1948        | Jungle Goddess                  | Jungle Goddess                  | Collins, Lewis D.               | Lewis D. Collins   | tt0040500        |
| 1746514422        | 1922        | 1922        | A Homespun Vamp                 | A Homespun Vamp                 | O'Connor, Frank                 | Frank O'Connor     | tt0013246        |
| 1746572452        | 1932        | 1932        | Red Dust                        | Red Dust                        | Fleming, Victor                 | Victor Fleming     | tt0023382        |
| 1746577283        | 1950        | 1950        | Square Dance Katy               | Square Dance Katy               | Yarbrough, Jean                 | Jean Yarbrough     | tt0042992        |
| 1746488018        | 1920        | 1920        | The Unseen Witness              | The Unseen Witness              | Collins, Tom                    | Tom Collins        | tt0188265        |
| 1746393769        | 1982        | 1982        | The Thing                       | The Thing                       | Carpenter, John                 | John Carpenter     | tt0084787        |
| 1746578432        | 1959        | 1959        | The Story on Page One           | The Story on Page One           | Odets, Clifford                 | Clifford Odets     | tt0053308        |
| <b>1746577985</b> | <b>1937</b> | <b>1937</b> | <b>Two Wise Maids</b>           | <b>Two Wise Maids</b>           | <b>Rosen, Phil</b>              | <b>Phil Rosen</b>  | <b>tt0029702</b> |
| 1746516546        | 1920        | 1920        | The Fourteenth Man              | The Fourteenth Man              | Henabery, Joseph                | Joseph Henabery    | tt0011207        |
| 1746491857        | 1947        | 1947        | Pirates of Monterey             | Pirates of Monterey             | Werker, Alfred                  | Alfred L. Werker   | tt0039709        |
| 1746423343        | 1991        | 1991        | For the Boys                    | For the Boys                    | Rydell, Mark                    | Mark Rydell        | tt0101902        |
| 1746435154        | 1940        | 1940        | Lightning Strikes West          | Lightning Strikes West          | Fraser, Harry                   | Harry L. Fraser    | tt0032707        |
| 1745342617        | 2003        | 2003        | Prey for Rock and Roll          | Prey for Rock & Roll            | Steyermark, Alex                | Alex Steyermark    | tt0307351        |
| 1746561605        | 1932        | 1932        | Riding for Justice              | Ridin' for Justice              | Lederman, D. Ross               | D. Ross Lederman   | tt0023401        |
| 1746487908        | 1921        | 1921        | Moonlight Follies               | Moonlight Follies               | Baggot, King                    | King Baggot        | tt0012472        |
| 1746524201        | 1910        | 1910        | Under Both Flags                | Under Both Flags                | Young Deer, James               | James Young Deer   | tt1225769        |
| 1746258464        | 1978        | 1978        | Eyes of Laura Mars              | Eyes of Laura Mars              | Kershner, Irvin                 | Irvin Kershner     | tt0077530        |
| 1746584900        | 1940        | 1940        | Hi-Yo Silver                    | Hi Yo Silver                    | Witney, William; English, John  | John English       | tt0032590        |
| 1746577653        | 1933        | 1933        | Gabriel over the White House    | Gabriel Over the White House    | LaCava, Gregory                 | Gregory La Cava    | tt0024044        |
| 1746570392        | 1933        | 1933        | The Nuisance                    | The Nuisance                    | Conway, Jack                    | Jack Conway        | tt0024396        |
| 1746513703        | 1927        | 1927        | A Hero on Horseback             | A Hero on Horseback             | Andrews, Del                    | Del Andrews        | tt0017985        |
| 1746574708        | 1933        | 1933        | Elmer, the Great                | Elmer, the Great                | LeRoy, Mervyn                   | Mervyn LeRoy       | tt0023982        |
| 1746504096        | 1922        | 1922        | The Three Buckaroos             | The Three Buckaroos             | Balshofer, Fred J.              | Fred J. Balshofer  | tt0170677        |
| 1746583389        | 1930        | 1930        | Captain of the Guard            | Captain of the Guard            | Robertson, John S.; Fejos, Paul | John S. Robertson  | tt0020741        |
| 1746473942        | 1942        | 1942        | To Be or Not to Be              | To Be or Not to Be              | Lubitsch, Ernst                 | Ernst Lubitsch     | tt0035446        |
| 1746582758        | 1935        | 1935        | Red Blood of Courage            | The Red Blood of Courage        | English, Jack                   | John English       | tt0026916        |
| 1746436133        | 1941        | 1941        | Pot O' Gold                     | Pot o' Gold                     | Marshall, George                | George Marshall    | tt0034055        |
| 1746475532        | 1947        | 1947        | Border Feud                     | Border Feud                     | Taylor, Ray                     | Ray Taylor         | tt0039210        |
| 1746474976        | 1947        | 1947        | Valley of Fear                  | Valley of Fear                  | Hillyer, Lambert                | Lambert Hillyer    | tt0039950        |

|            |      |      |                                       |                                       |                         |                        |           |
|------------|------|------|---------------------------------------|---------------------------------------|-------------------------|------------------------|-----------|
| 1746433562 | 1989 | 1989 | Phantom of the Mall: Eric's Revenge   | Phantom of the Mall: Eric's Revenge   | Friedman, Richard       | Richard Friedman       | tt0098089 |
| 1746514257 | 1923 | 1923 | The Town Scandal                      | The Town Scandal                      | Baggot, King            | King Baggot            | tt0014556 |
| 1746556010 | 1954 | 1954 | The Bounty Hunter                     | The Bounty Hunter                     | DeToth, Andre           | André De Toth          | tt0046801 |
| 1746218707 | 1974 | 1974 | The Great Gatsby                      | The Great Gatsby                      | Clayton, Jack           | Jack Clayton           | tt0071577 |
| 1746520264 | 1948 | 1948 | Shep Comes Home                       | Shep Comes Home                       | Beebe, Ford             | Ford Beebe             | tt0038935 |
| 1746512379 | 1915 | 1915 | The Man Who Found Himself             | The Man Who Found Himself             | Crane, Frank H.         | Frank Hall Crane       | tt0005696 |
| 1746513382 | 1910 | 1910 | The Vicar of Wakefield                | The Vicar of Wakefield                |                         | Theodore Marston       | tt0409435 |
| 1746582257 | 1930 | 1930 | The Danger Man                        | The Danger Man                        | Pollard, Bud            | Charles Hutchison      | tt0020807 |
| 1745293348 | 2006 | 2005 | Harsh Times                           | Harsh Times                           | Ayer, David             | David Ayer             | tt0433387 |
| 1746217058 | 1966 | 1966 | Dead Heat on a Merry-Go-Round         | Dead Heat on a Merry Go Round         | Girard, Bernard         | Bernard Girard         | tt0060287 |
| 1746217033 | 1967 | 1967 | The Way West                          | The Way West                          | McLaglen, Andrew V.     | Andrew V. McLaglen     | tt0062479 |
| 1746574903 | 1935 | 1935 | Escapade                              | Escapade                              | Leonard, Robert Z.      | Robert Z. Leonard      | tt0026319 |
| 1746584806 | 1928 | 1928 | The Yellow Lily                       | Yellow Lily                           | Korda, Alexander        | Alexander Korda        | tt0019603 |
| 1746258155 | 1978 | 1978 | The Driver                            | The Driver                            | Hill, Walter            | Walter Hill            | tt0077474 |
| 1746508042 | 1926 | 1926 | The Texas Streak                      | The Texas Streak                      | Reynolds, Lynn          | Lynn Reynolds          | tt0017455 |
| 1746576918 | 1958 | 1958 | Rock-a-Bye Baby                       | Rock a Bye Baby                       | Tashlin, Frank          | Frank Tashlin          | tt0052141 |
| 1746523441 | 1916 | 1915 | The Beast                             | The Beast                             | Stanton, Richard        | Edgar Jones            | tt0415626 |
| 1746501028 | 1917 | 1917 | Fighting Mad                          | Fighting Mad                          | Le Saint, Edward J.     | Edward LeSaint         | tt0007943 |
| 1746422265 | 1994 | 1994 | Reality Bites                         | Reality Bites                         | Stiller, Ben            | Ben Stiller            | tt0110950 |
| 1746582593 | 1935 | 1935 | Men Without Names                     | Men Without Names                     | Murphy, Ralph           | Ralph Murphy           | tt0026699 |
| 1745342933 | 2002 | 2002 | OT: Our Town                          | OT: Our Town                          | Kennedy, Scott Hamilton | Scott Hamilton Kennedy | tt0334029 |
| 1746502058 | 1915 | 1915 | The Moonstone                         | The Moonstone                         | Crane, Frank            | Frank Hall Crane       | tt0005769 |
| 1746574653 | 1935 | 1935 | The Dawn Rider                        | The Dawn Rider                        | Bradbury, R. N.         | Robert N. Bradbury     | tt0026267 |
| 1746573899 | 1963 | 1963 | Gunfight at Comanche Creek            | Gunfight at Comanche Creek            | McDonald, Frank         | Frank McDonald         | tt0058165 |
| 1746424606 | 1943 | 1943 | So Proudly We Hail!                   | So Proudly We Hail!                   | Sandrich, Mark          | Mark Sandrich          | tt0036367 |
| 1746520594 | 1925 | 1925 | The Goose Woman                       | The Goose Woman                       | Brown, Clarence         | Clarence Brown         | tt0015872 |
| 1746464928 | 1942 | 1942 | Eagle Squadron                        | Eagle Squadron                        | Lubin, Arthur           | Arthur Lubin           | tt0034691 |
| 1746500527 | 1924 | 1924 | Wanted by the Law                     | Wanted by the Law                     | Bradbury, Robert N.     | Robert N. Bradbury     | tt0015470 |
| 1746437407 | 1941 | 1941 | Road to Happiness                     | Road to Happiness                     | Rosen, Phil             | Phil Rosen             | tt0035261 |
| 1746573812 | 1957 | 1957 | Hell Canyon Outlaws                   | Hell Canyon Outlaws                   | Landres, Paul           | Paul Landres           | tt0050496 |
| 1746474516 | 1948 | 1948 | The Golden Eye                        | The Golden Eye                        | Beaudine, William       | William Beaudine       | tt0040394 |
| 1746219577 | 1980 | 1980 | Don't Answer the Phone                | Don't Answer the Phone!               | Hammer, Robert          | Robert Hammer          | tt0080645 |
| 1746582705 | 1937 | 1937 | Personal Property                     | Personal Property                     | Van Dyke, W. S.         | W.S. Van Dyke          | tt0029395 |
| 1746271952 | 1980 | 1980 | The Gong Show Movie                   | The Gong Show Movie                   | Barris, Chuck           | Chuck Barris           | tt0080808 |
| 1746520150 | 1925 | 1925 | The New Commandment                   | The New Commandment                   | Higgin, Howard          | Howard Higgin          | tt0016153 |
| 1746198198 | 1966 | 1966 | Girl on a Chain Gang                  | Girl on a Chain Gang                  | Gross, Jerry            | Jerry Gross            | tt0059226 |
| 1746454109 | 1998 | 1998 | Simon Birch                           | Simon Birch                           | Johnson, Mark Steven    | Mark Steven Johnson    | tt0124879 |
| 1746465122 | 1947 | 1947 | Range Beyond the Blue                 | Range Beyond the Blue                 | Taylor, Ray             | Ray Taylor             | tt0039751 |
| 1746464816 | 1942 | 1942 | Nightmare                             | Nightmare                             | Whelan, Tim             | Tim Whelan             | tt0035127 |
| 1746580331 | 1935 | 1935 | Frontier Justice                      | Frontier Justice                      | McGowan, Robert         | Robert F. McGowan      | tt0027647 |
| 1746219071 | 1971 | 1971 | The Gang That Couldn't Shoot Straight | The Gang That Couldn't Shoot Straight | Goldstone, James        | James Goldstone        | tt0067124 |
| 1746571675 | 1931 | 1931 | Ladies' Man                           | Ladies' Man                           | Mendes, Lothar          | Lothar Mendes          | tt0022043 |
| 1746434258 | 1991 | 1991 | Boyz n the Hood                       | Boyz n the Hood                       | Singleton, John         | John Singleton         | tt0101507 |
| 1746419618 | 1981 | 1981 | Modern Romance                        | Modern Romance                        | Brooks, Albert          | Albert Brooks          | tt0082764 |
| 1746573705 | 1910 | 1910 | The Early Settlers                    | The Early Settlers                    |                         |                        | tt1390938 |
| 1746554522 | 1964 | 1964 | Handle With Care                      | Handle with Care                      | McCarthy, John K.       | John K. McCarthy       | tt0218319 |
| 1746433725 | 1993 | 1993 | Addams Family Values                  | Addams Family Values                  | Sonnenfeld, Barry       | Barry Sonnenfeld       | tt0106220 |
| 1746578408 | 1959 | 1959 | Some Like It Hot                      | Some Like It Hot                      | Wilder, Billy           | Billy Wilder           | tt0053291 |
| 1746561079 | 1932 | 1932 | A Bill of Divorcement                 | A Bill of Divorcement                 | Cukor, George           | George Cukor           | tt0022685 |
| 1746575010 | 1935 | 1935 | The Gilded Lily                       | The Gilded Lily                       | Ruggles, Wesley         | Wesley Ruggles         | tt0026409 |
| 1746570068 | 1952 | 1952 | The World in His Arms                 | The World in His Arms                 | Walsh, Raoul            | Raoul Walsh            | tt0045339 |
| 1746584042 | 1940 | 1940 | American Gang Busters                 | The American Gang Busters             | Dion, A. F.             | A.F. Dion              | tt0189349 |
| 1746513636 | 1923 | 1923 | The Darling of New York               | The Darling of New York               | Baggot, King            | King Baggot            | tt0013975 |
| 1746569706 | 1958 | 1958 | I Accuse!                             | I Accuse!                             | Ferrer, José            | José Ferrer            | tt0051754 |
| 1746465423 | 1946 | 1946 | Dangerous Millions                    | Dangerous Millions                    | Tinling, James          | James Tinling          | tt0038448 |
| 1746491856 | 1943 | 1943 | Unknown Guest                         | The Unknown Guest                     | Neumann, Kurt           | Kurt Neumann           | tt0036480 |
| 1746563977 | 1951 | 1950 | Frenchie                              | Frenchie                              | King, Louis             | Louis King             | tt0042482 |

|            |      |      |                                  |                                  |                     |                    |           |
|------------|------|------|----------------------------------|----------------------------------|---------------------|--------------------|-----------|
| 1746503792 | 1920 | 1920 | The Amateur Wife                 | The Amateur Wife                 | Dillon, Edward      | Edward Dillon      | tt0184200 |
| 1769970447 | 1967 | 1967 | Marked for Love                  | Marked for Love                  | Clay, Adam          | Adam Clay          | tt0251227 |
| 1746504781 | 1917 | 1917 | The Secret of Black Mountain     | The Secret of Black Mountain     | Hoffman, Otto       | Otto Hoffman       | tt0008552 |
| 1746198119 | 1968 | 1968 | Bye Bye Braverman                | Bye Bye Braverman                | Lumet, Sidney       | Sidney Lumet       | tt0062768 |
| 1746464841 | 1940 | 1940 | La Conga Nights                  | La Conga Nights                  | Landers, Lew        | Lew Landers        | tt0032682 |
| 1746234445 | 1965 | 1965 | The Flight of the Phoenix        | The Flight of the Phoenix        | Aldrich, Robert     | Robert Aldrich     | tt0059183 |
| 1746581969 | 1910 | 1910 | In the Great Northwest           | In the Great Northwest           |                     | Francis Boggs      | tt0352434 |
| 1746483842 | 1917 | 1917 | The Spotted Lily                 | The Spotted Lily                 | Solter, Harry       | Harry Solter       | tt0008621 |
| 1746569564 | 1954 | 1954 | Varietease                       | Varietease                       | Klaw, Irving        | Irving Klaw        | tt0047643 |
| 1769971194 | 1969 | 1969 | Alimony Lovers                   | Alimony Lovers                   | Perkins, Harold     | John Hayes         | tt0154127 |
| 1746570401 | 1952 | 1952 | Jungle Jim in the Forbidden Land | Jungle Jim in the Forbidden Land | Landers, Lew        | Lew Landers        | tt0044777 |
| 1746583862 | 1929 | 1929 | The Careless Age                 | The Careless Age                 | Wray, John Griffith | John Griffith Wray | tt0019752 |
| 1769973192 | 1970 | 1970 | Big Beaver                       | Big Beaver                       | Lavender, Semore    | Semore Lavender    | tt0211250 |
| 1746198131 | 1969 | 1969 | Hang Your Hat on the Wind        | Hang Your Hat on the Wind        | Lansburgh, Larry    | Larry Lansburgh    | tt0218321 |
| 1746570740 | 1952 | 1952 | Thunderbirds                     | Thunderbirds                     | Auer, John H.       | John H. Auer       | tt0045237 |
| 1746582154 | 1951 | 1951 | Dear Brat                        | Dear Brat                        | Seiter, William H.  | William A. Seiter  | tt0043457 |
| 1746496058 | 1918 | 1918 | Smashing Through                 | Smashing Through                 | Clifton, Elmer      | Elmer Clifton      | tt0009624 |
| 1746475244 | 1947 | 1947 | The Return of Rin Tin Tin        | The Return of Rin Tin Tin        | Nosseck, Max        | Max Nosseck        | tt0039763 |
| 1746465245 | 1947 | 1947 | Slave Girl                       | Slave Girl                       | Lamont, Charles     | Charles Lamont     | tt0039836 |
| 1746274940 | 1979 | 1979 | Escape from Alcatraz             | Escape from Alcatraz             | Siegel, Donald      | Don Siegel         | tt0079116 |
| 1746235814 | 1978 | 1978 | Movie Movie                      | Movie Movie                      | Donen, Stanley      | Stanley Donen      | tt0077952 |
| 1746467929 | 1917 | 1917 | Beloved Jim                      | Beloved Jim                      | Paton, Stuart       | Stuart Paton       | tt0007695 |
| 1746491834 | 1948 | 1948 | Money Madness                    | Money Madness                    | Stewart, Peter      | Sam Newfield       | tt0040604 |
| 1746584355 | 1940 | 1940 | Pride of the Bowery              | Pride of the Bowery              | Lewis, Joseph H.    | Joseph H. Lewis    | tt0034064 |
| 1746520538 | 1927 | 1927 | Rich Men's Sons                  | Rich Men's Sons                  | Graves, Ralph       | Ralph Graves       | tt0018323 |
| 1746554125 | 1964 | 1964 | My Fair Lady                     | My Fair Lady                     | Cukor, George       | George Cukor       | tt0058385 |
| 1745293398 | 2006 | 2006 | The Shaggy Dog                   | The Shaggy Dog                   | Robbins, Brian      | Brian Robbins      | tt0393735 |
| 1746251222 | 1976 | 1976 | Embryo                           | Embryo                           | Nelson, Ralph       | Ralph Nelson       | tt0074475 |
| 1746501630 | 1915 | 1915 | The Alster Case                  | The Alster Case                  | Haydon, J. Charles  | J. Charles Haydon  | tt0004884 |
| 1769970473 | 1967 | 1967 | Come Ride the Wild Pink Horse    | Come Ride the Wild Pink Horse    | Sarno, Joe          | Joseph W. Sarno    | tt0060252 |
| 1746574060 | 1957 | 1957 | From Hell It Came                | From Hell It Came                | Milner, Dan         | Dan Milner         | tt0050414 |
| 1746454835 | 1944 | 1944 | Hey, Rookie                      | Hey, Rookie                      | Barton, Charles     | Charles Barton     | tt0036915 |
| 1746508970 | 1925 | 1925 | Private Affairs                  | Private Affairs                  | Hoffman, Renaud     | Renaud Hoffman     | tt0016247 |
| 1746456046 | 1997 | 1997 | All Over Me                      | All Over Me                      | Sichel, Alex        | Alex Sichel        | tt0118586 |
| 1746514706 | 1927 | 1927 | Topsy and Eva                    | Topsy and Eva                    | Lord, Del           | Del Lord           | tt0173340 |
| 1746219365 | 1980 | 1980 | One-Trick Pony                   | One-Trick Pony                   | Young, Robert M.    | Robert M. Young    | tt0081280 |
| 1746542631 | 1925 | 1925 | The Great Love                   | The Great Love                   | Neilan, Marshall    | Marshall Neilan    | tt0015878 |
| 1746454706 | 1995 | 1995 | Houseguest                       | Houseguest                       | Miller, Randall     | Randall Miller     | tt0110066 |
| 1746574661 | 1933 | 1933 | Scarlet River                    | Scarlet River                    | Brower, Otto        | Otto Brower        | tt0024524 |
| 1746532629 | 1915 | 1915 | The Bridge of Sighs              | The Bridge of Sighs              |                     | Bertram Bracken    | tt0421814 |
| 1746573114 | 1931 | 1931 | Lariats and Six Shooters         | Lariats and Six Shooters         | Neitz, Alvin J.     | Alan James         | tt0022052 |
| 1746562366 | 1955 | 1955 | Treasure of Ruby Hills           | Treasure of Ruby Hills           | McDonald, Frank     | Frank McDonald     | tt0048745 |
| 1746566094 | 1954 | 1954 | Playgirl                         | Playgirl                         | Pevney, Joseph      | Joseph Pevney      | tt0047355 |
| 1746567696 | 1952 | 1952 | Laramie Mountains                | Laramie Mountains                | Nazarro, Ray        | Ray Nazarro        | tt0044824 |
| 1746465199 | 1942 | 1942 | A Close Call for Ellery Queen    | A Close Call for Ellery Queen    | Hogan, James        | James P. Hogan     | tt0034602 |
| 1746503962 | 1922 | 1922 | Love Is an Awful Thing           | Love Is an Awful Thing           | Heerman, Victor     | Victor Heerman     | tt0013334 |
| 1746581720 | 1951 | 1951 | I Was an American Spy            | I Was an American Spy            | Selander, Lesley    | Lesley Selander    | tt0043666 |
| 1746507590 | 1924 | 1924 | Love's Whirlpool                 | Love's Whirlpool                 | Mitchell, Bruce     | Bruce Mitchell     | tt0015089 |
| 1746581157 | 1910 | 1910 | Go West, Young Woman, Go West    | Go West, Young Woman, Go West    |                     |                    | tt0345339 |
| 1769975751 | 1918 | 1918 | Cave Man Stuff                   | Cave Man Stuff                   | Curtis, Allen       | Allen Curtis       | tt0328935 |
| 1746486774 | 1918 | 1918 | Hungry Eyes                      | Hungry Eyes                      | Julian, Rupert      | Rupert Julian      | tt0009213 |
| 1746584936 | 1940 | 1940 | Parole Fixer                     | Parole Fixer                     | Florey, Robert      | Robert Florey      | tt0032890 |
| 1746423176 | 1940 | 1940 | Captain Caution                  | Captain Caution                  | Wallace, Richard    | Richard Wallace    | tt0032304 |
| 1746583804 | 1930 | 1930 | The Doorway to Hell              | The Doorway to Hell              | Mayo, Archie        | Archie Mayo        | tt0020836 |
| 1769973298 | 1970 | 1971 | Room 11                          | Room 11                          | Irwin, Bud          | Bud Irwin          | tt0257053 |
| 1769970460 | 1967 | 1968 | Hot Erotic Dreams                | Hot Erotic Dreams                | Shuman, Mort        | Mort Shuman        | tt0220529 |
| 1746217522 | 1966 | 1966 | Fireball 500                     | Fireball 500                     | Asher, William      | William Asher      | tt0060415 |



|            |      |      |                                                |                                             |                                  |                      |           |
|------------|------|------|------------------------------------------------|---------------------------------------------|----------------------------------|----------------------|-----------|
| 1746585364 | 1939 | 1939 | Pirates of the Skies                           | Pirates of the Skies                        | McDonough, Joseph A.             | Joseph A. McDonough  | tt0031801 |
| 1746584403 | 1940 | 1940 | Li'l Abner                                     | Li'l Abner                                  | Rogell, Albert S.                | Albert S. Rogell     | tt0032703 |
| 1746562462 | 1955 | 1955 | The Phenix City Story                          | The Phenix City Story                       | Karlson, Phil                    | Phil Karlson         | tt0048488 |
| 1746583503 | 1951 | 1951 | Starlift                                       | Starlift                                    | Del Ruth, Roy                    | Roy Del Ruth         | tt0044070 |
| 1746578819 | 1962 | 1962 | Two Weeks in Another Town                      | Two Weeks in Another Town                   | Minnelli, Vincente               | Vincente Minnelli    | tt0056625 |
| 1746492708 | 1948 | 1948 | Station West                                   | Station West                                | Lanfield, Sidney                 | Sidney Lanfield      | tt0040835 |
| 1746409963 | 1983 | 1983 | Twilight Zone: The Movie                       | Twilight Zone: The Movie                    |                                  | Joe Dante            | tt0086491 |
| 1746583237 | 1929 | 1929 | The Ghost Talks                                | The Ghost Talks                             | Seiler, Lewis                    | Lewis Seiler         | tt0019923 |
| 1746421069 | 1999 | 1999 | The Out-of-Towners                             | The Out-of-Towners                          | Weisman, Sam                     | Sam Weisman          | tt0129280 |
| 1746515575 | 1918 | 1918 | The Widow's Might                              | Widow's Might                               | de Mille, William C.             |                      | tt0437563 |
| 1746249224 | 1975 | 1975 | The Apple Dumpling Gang                        | The Apple Dumpling Gang                     | Tokar, Norman                    | Norman Tokar         | tt0072653 |
| 1746562436 | 1955 | 1955 | Jail Busters                                   | Jail Busters                                | Beaudine, William                | William Beaudine     | tt0048222 |
| 1746433693 | 1996 | 1996 | Paradise Lost: The Child Murders at Robin Hood | Paradise Lost: The Child Murders at Robin H | Berlinger, Joe ; Sinofsky, Bruce | Joe Berlinger        | tt0117293 |
| 1745340034 | 2004 | 2004 | 13 Going on 30                                 | 13 Going on 30                              | Winick, Gary                     | Gary Winick          | tt0337563 |
| 1746508049 | 1925 | 1925 | Passionate Youth                               | Passionate Youth                            | Fitzgerald, Dallas M.            | Dallas M. Fitzgerald | tt0016204 |
| 1746234564 | 1966 | 1966 | The Navy vs. the Night Monsters                | The Navy vs. the Night Monsters             | Hoey, Michael A.                 | Michael A. Hoey      | tt0060741 |
| 1746421075 | 1992 | 1992 | Buffy the Vampire Slayer                       | Buffy the Vampire Slayer                    | Kuzui, Fran Rubel                | Fran Rubel Kuzui     | tt0103893 |
| 1746569722 | 1953 | 1953 | Son of Belle Starr                             | Son of Belle Starr                          | McDonald, Frank                  | Frank McDonald       | tt0046346 |
| 1746584536 | 1929 | 1929 | The Glad Rag Doll                              | Glad Rag Doll                               | Curtiz, Michael                  | Michael Curtiz       | tt0019932 |
| 1746583325 | 1931 | 1931 | Five Star Final                                | Five Star Final                             | LeRoy, Mervyn                    | Mervyn LeRoy         | tt0021873 |
| 1746273824 | 1980 | 1980 | Private Benjamin                               | Private Benjamin                            | Zieff, Howard                    | Howard Zieff         | tt0081375 |
| 1746454316 | 1996 | 1996 | Sunchaser                                      | The Sunchaser                               | Cimino, Michael                  | Michael Cimino       | tt0117781 |
| 1746409036 | 1988 | 1988 | School Daze                                    | School Daze                                 | Lee, Spike                       | Spike Lee            | tt0096054 |
| 1746492866 | 1948 | 1948 | Tap Roots                                      | Tap Roots                                   | Marshall, George                 | George Marshall      | tt0040861 |
| 1746578785 | 1960 | 1960 | The Music Box Kid                              | The Music Box Kid                           | Cahn, Edward L.                  | Edward L. Cahn       | tt0054103 |
| 1746564271 | 1951 | 1951 | Fort Defiance                                  | Fort Defiance                               | Rawlins, John                    | John Rawlins         | tt0043554 |
| 1746520104 | 1925 | 1925 | Satan in Sables                                | Satan in Sables                             | Flood, James                     | James Flood          | tt0016313 |
| 1746454961 | 1945 | 1944 | House of Frankenstein                          | House of Frankenstein                       | Kenton, Erle C.                  | Erle C. Kenton       | tt0036931 |
| 1746573746 | 1957 | 1957 | The Shadow on the Window                       | The Shadow on the Window                    | Asher, William                   | William Asher        | tt0049748 |
| 1746492585 | 1944 | 1944 | Passage to Marseille                           | Passage to Marseille                        | Curtiz, Michael                  | Michael Curtiz       | tt0037166 |
| 1746523929 | 1915 | 1915 | A Little Brother of the Rich                   | A Little Brother of the Rich                | Turner, Otis                     | Otis Turner          | tt0005624 |
| 1746566058 | 1955 | 1955 | Dial Red O                                     | Dial Red O                                  | Ullman, Daniel B.                | Daniel B. Ullman     | tt0047993 |
| 1746520395 | 1925 | 1925 | The Night Club                                 | The Night Club                              | Urson, Frank; Iribe, Paul        | Paul Iribe           | tt0016156 |
| 1746524027 | 1923 | 1923 | Red Lights                                     | Red Lights                                  | Badger, Clarence G.              | Clarence G. Badger   | tt0014398 |
| 1746585153 | 1928 | 1928 | The Garden of Eden                             | The Garden of Eden                          | Milestone, Lewis                 | Lewis Milestone      | tt0018927 |
| 1746502715 | 1915 | 1915 | A Bunch of Keys                                | A Bunch of Keys                             | Baker, Richard Foster            | Richard Foster Baker | tt0005036 |
| 1745374462 | 2009 | 2009 | Nine                                           | Nine                                        | Marshall, Rob                    | Rob Marshall         | tt0875034 |
| 1746495881 | 1918 | 1918 | Caught in the Act                              | Caught in the Act                           | Millarde, Harry                  | Harry F. Millarde    | tt0008953 |
| 1746583979 | 1939 | 1939 | Streets of New York                            | Streets of New York                         | Nigh, William; Mintz, Jack       | William Nigh         | tt0031987 |
| 1746581615 | 1930 | 1930 | The Arizona Kid                                | The Arizona Kid                             | Santell, Alfred                  | Alfred Santell       | tt0020649 |
| 1746524486 | 1910 | 1910 | A Rose of the Philippines                      | A Rose of the Philippines                   |                                  |                      | tt1889362 |
| 1746497894 | 1917 | 1917 | The Man Who Forgot                             | The Man Who Forgot                          | Chautard, Emile                  | Emile Chautard       | tt0008255 |
| 1746577143 | 1961 | 1961 | Ring of Fire                                   | Ring of Fire                                | Stone, Andrew L.                 | Andrew L. Stone      | tt0055374 |
| 1746500481 | 1924 | 1924 | Ace of the Law                                 | Ace of the Law                              | King, Lewis                      | Louis King           | tt0220959 |
| 1746218597 | 1972 | 1972 | Northeast of Seoul                             | Northeast of Seoul                          | Rich, David Lowell               | David Lowell Rich    | tt0069022 |
| 1746501113 | 1915 | 1915 | The Running Fight                              | The Running Fight                           | Durkin, James                    | James Durkin         | tt0005990 |
| 1746465016 | 1942 | 1942 | Random Harvest                                 | Random Harvest                              | LeRoy, Mervyn                    | Mervyn LeRoy         | tt0035238 |
| 1746474833 | 1945 | 1945 | Sheriff of Cimarron                            | Sheriff of Cimarron                         | Canutt, Yakima                   | Yakima Canutt        | tt0038085 |
| 1746577704 | 1935 | 1935 | Arizona Badman                                 | Arizona Bad Man                             | Luby, S. Roy                     | S. Roy Luby          | tt0026080 |
| 1746508956 | 1950 | 1950 | Captain Carey, U.S.A.                          | Captain Carey, U.S.A.                       | Leisen, Mitchell                 | Mitchell Leisen      | tt0042310 |
| 1769970535 | 1968 | 1968 | Two Girls for a Madman                         | Two Girls for a Madman                      | Brasloff, Stanley H.             | Stanley H. Brassloff | tt0062620 |
| 1746198128 | 1969 | 1969 | Topaz                                          | Topaz                                       | Hitchcock, Alfred                | Alfred Hitchcock     | tt0065112 |
| 1746465248 | 1946 | 1946 | The Mysterious Mr. Valentine                   | The Mysterious Mr. Valentine                | Ford, Philip                     | Philip Ford          | tt0038768 |
| 1746561324 | 1957 | 1957 | That Night!                                    | That Night!                                 | Newland, John                    | John Newland         | tt0051070 |
| 1746577082 | 1961 | 1961 | Mad Dog Coll                                   | Mad Dog Coll                                | Balaban, Burt                    | Burt Balaban         | tt0055118 |
| 1769970582 | 1966 | 1966 | Hot Nights on the Campus                       | Hot Nights on the Campus                    | Orlando, Tony                    | Tony Orlando         | tt0125171 |
| 1746533161 | 1915 | 1915 | The Sins of Society                            | The Sins of Society                         | Eagle, Oscar                     | Oscar Eagle          | tt0006051 |

|            |      |      |                                              |                                              |                                    |                    |           |
|------------|------|------|----------------------------------------------|----------------------------------------------|------------------------------------|--------------------|-----------|
| 1746578979 | 1963 | 1963 | Beach Party                                  | Beach Party                                  | Asher, William                     | William Asher      | tt0056860 |
| 1746420230 | 1988 | 1988 | Funny Farm                                   | Funny Farm                                   | Hill, George Roy                   | George Roy Hill    | tt0095188 |
| 1746572419 | 1910 | 1910 | The Cowboy's Stratagem                       | The Cowboy's Stratagem                       |                                    |                    | tt0345082 |
| 1746554158 | 1963 | 1963 | Donovan's Reef                               | Donovan's Reef                               | Ford, John                         | John Ford          | tt0057007 |
| 1746508754 | 1925 | 1925 | Daring Days                                  | Daring Days                                  | O'Brien, John B.                   | John B. O'Brien    | tt0015734 |
| 1746408431 | 1985 | 1985 | Creator                                      | Creator                                      | Passer, Ivan                       | Ivan Passer        | tt0088960 |
| 1746580443 | 1937 | 1937 | Forlorn River                                | Forlorn River                                | Barton, Charles                    | Charles Barton     | tt0028890 |
| 1746574586 | 1937 | 1937 | Springtime in the Rockies                    | Springtime in the Rockies                    | Kane, Joe                          | Joseph Kane        | tt0029602 |
| 1746420861 | 1994 | 1994 | True Lies                                    | True Lies                                    | Cameron, James                     | James Cameron      | tt0111503 |
| 1746421577 | 1981 | 1981 | The Decline of Western Civilization          | The Decline of Western Civilization          | Spheeris, Penelope                 | Penelope Spheeris  | tt0082252 |
| 1746581346 | 1961 | 1961 | Sanctuary                                    | Sanctuary                                    | Richardson, Tony                   | Tony Richardson    | tt0055402 |
| 1746496245 | 1918 | 1918 | \$5,000 Reward                               | \$5,000 Reward                               | Gerrard, Douglas                   | Douglas Gerrard    | tt0008808 |
| 1746513427 | 1923 | 1923 | Mr. Billings Spends His Dime                 | Mr. Billings Spends His Dime                 | Ruggles, Wesley                    | Wesley Ruggles     | tt0014296 |
| 1746520754 | 1925 | 1925 | The Fool                                     | The Fool                                     | Millarde, Harry                    | Harry F. Millarde  | tt0015833 |
| 1745272129 | 2000 | 2000 | Spin the Bottle                              | Spin the Bottle                              | Yerkes, Jamie                      | Jamie Yerkes       | tt0131596 |
| 1746504136 | 1918 | 1918 | Lend Me Your Name                            | Lend Me Your Name                            | Balshofer, Fred J.                 | Fred J. Balshofer  | tt0009285 |
| 1746434932 | 1998 | 1998 | Wild Things                                  | Wild Things                                  | McNaughton, John                   | John McNaughton    | tt0120890 |
| 1746580438 | 1938 | 1938 | Trade Winds                                  | Trade Winds                                  | Garnett, Tay                       | Tay Garnett        | tt0030888 |
| 1746580917 | 1939 | 1939 | The Man from Sundown                         | The Man from Sundown                         | Nelson, Sam                        | Sam Nelson         | tt0031613 |
| 1746569718 | 1958 | 1958 | Quantrill's Raiders                          | Quantrill's Raiders                          | Bernds, Edward                     | Edward Bernds      | tt0052103 |
| 1746438160 | 1944 | 1944 | Men on Her Mind                              | Men on Her Mind                              | Fox, Wallace W.                    | Wallace Fox        | tt0037067 |
| 1746393741 | 1985 | 1985 | Rappin'                                      | Rappin'                                      | Silberg, Joel                      | Joel Silberg       | tt0089883 |
| 1745293270 | 2006 | 2006 | A Prairie Home Companion                     | A Prairie Home Companion                     | Altman, Robert                     | Robert Altman      | tt0420087 |
| 1746202534 | 1970 | 1970 | Promise at Dawn                              | Promise at Dawn                              | Dassin, Jules                      | Jules Dassin       | tt0066251 |
| 1746454704 | 1946 | 1946 | Murder in the Music Hall                     | Murder in the Music Hall                     | English, John                      | John English       | tt0038758 |
| 1746208633 | 1968 | 1968 | The Swimmer                                  | The Swimmer                                  | Perry, Frank                       | Frank Perry        | tt0063663 |
| 1746583029 | 1937 | 1937 | Dangerously Yours                            | Dangerously Yours                            | St. Clair, Mal                     | Malcolm St. Clair  | tt0028765 |
| 1746580335 | 1939 | 1939 | Fugitive at Large                            | Fugitive at Large                            | Collins, Lewis D.                  | Lewis D. Collins   | tt0031352 |
| 1746584890 | 1939 | 1939 | Tropic Fury                                  | Tropic Fury                                  | Cabanne, Christy                   | Christy Cabanne    | tt0032057 |
| 1746574891 | 1937 | 1937 | Racing Lady                                  | Racing Lady                                  | Fox, Wallace                       | Wallace Fox        | tt0028153 |
| 1746520586 | 1950 | 1950 | The Flame and the Arrow                      | The Flame and the Arrow                      | Tourneur, Jacques                  | Jacques Tourneur   | tt0042464 |
| 1746257987 | 1978 | 1978 | The Fury                                     | The Fury                                     | De Palma, Brian                    | Brian De Palma     | tt0077588 |
| 1745340897 | 2002 | 2002 | Unfaithful                                   | Unfaithful                                   | Lyne, Adrian                       | Adrian Lyne        | tt0250797 |
| 1746269507 | 1980 | 1980 | The Children                                 | The Children                                 | Kalmanowicz, Max                   | Max Kalmanowicz    | tt0080527 |
| 1746421849 | 1940 | 1940 | Wild Horse Valley                            | Wild Horse Valley                            | Webb, Ira                          | Ira Webb           | tt0033262 |
| 1746542748 | 1925 | 1925 | The Awful Truth                              | The Awful Truth                              | Powell, Paul                       | Paul Powell        | tt0015589 |
| 1746491846 | 1944 | 1944 | Lifeboat                                     | Lifeboat                                     | Hitchcock, Alfred                  | Alfred Hitchcock   | tt0037017 |
| 1746555064 | 1955 | 1955 | Cinerama Holiday                             | Cinerama Holiday                             | Bendick, Robert; De Lacy, Philippe | Robert L. Bendick  | tt0047939 |
| 1746198060 | 1969 | 1969 | Where It's At                                | Where It's At                                | Kanin, Garson                      | Garson Kanin       | tt0065208 |
| 1746569658 | 1955 | 1955 | The Naked Dawn                               | The Naked Dawn                               | Ulmer, Edgar G.                    | Edgar G. Ulmer     | tt0048411 |
| 1746524318 | 1923 | 1923 | Crossed Wires                                | Crossed Wires                                | Baggot, King                       | King Baggot        | tt0013960 |
| 1769974259 | 1916 | 1916 | Going Up                                     | Going Up                                     | Myll, Louis                        | Milton J. Fahrney  | tt0460139 |
| 1746584274 | 1940 | 1940 | Earl of Puddleston                           | Earl of Puddleston                           | Meins, Gus                         | Gus Meins          | tt0032425 |
| 1746584334 | 1939 | 1939 | Susannah of the Mounties                     | Susannah of the Mounties                     | Seiter, William A.; Lang, Walter   | William A. Seiter  | tt0031995 |
| 1746394202 | 1991 | 1990 | Superstar: The Life and Times of Andy Warhol | Superstar: The Life and Times of Andy Warhol | Workman, Chuck                     | Chuck Workman      | tt0103008 |
| 1746577504 | 1937 | 1937 | Murder in Greenwich Village                  | Murder in Greenwich Village                  | Rogell, Albert S.                  | Albert S. Rogell   | tt0029274 |
| 1746453835 | 1941 | 1941 | Buy Me That Town                             | Buy Me That Town                             | Forde, Eugene                      | Eugene Forde       | tt0033442 |
| 1746566258 | 1953 | 1953 | Last of the Comanches                        | Last of the Comanches                        | DeToth, Andre                      | André De Toth      | tt0044828 |
| 1746574975 | 1935 | 1935 | Public Opinion                               | Public Opinion                               | Strayer, Frank R.                  | Frank R. Strayer   | tt0026898 |
| 1746520076 | 1925 | 1925 | Go West                                      | Go West                                      | Keaton, Buster                     | Buster Keaton      | tt0015863 |
| 1746496050 | 1918 | 1918 | Men                                          | Men                                          | Vekroff, Perry N.                  | Perry N. Vekroff   | tt0186343 |
| 1746491737 | 1946 | 1946 | Badman's Territory                           | Badman's Territory                           | Whelan, Tim                        | Tim Whelan         | tt0038321 |
| 1746532456 | 1916 | 1916 | Arms and the Woman                           | Arms and the Woman                           | Fitzmaurice, George                | George Fitzmaurice | tt0006371 |
| 1746211013 | 1971 | 1971 | Play Misty for Me                            | Play Misty for Me                            | Eastwood, Clint                    | Clint Eastwood     | tt0067588 |
| 1746574668 | 1936 | 1936 | Little Miss Nobody                           | Little Miss Nobody                           | Blystone, John                     | John G. Blystone   | tt0027894 |
| 1746217333 | 1966 | 1966 | The Gentle Rain                              | The Gentle Rain                              | Balaban, Burt                      | Burt Balaban       | tt0060452 |
| 1746465425 | 1945 | 1945 | Captain Kidd                                 | Captain Kidd                                 | Lee, Rowland V.                    | Rowland V. Lee     | tt0037576 |

|            |      |      |                                     |                                     |                      |                                     |           |
|------------|------|------|-------------------------------------|-------------------------------------|----------------------|-------------------------------------|-----------|
| 1746584591 | 1930 | 1929 | Happy Days                          | Happy Days                          | Stoloff, Benjamin    | Benjamin Stoloff                    | tt0020949 |
| 1746578920 | 1958 | 1958 | The Light in the Forest             | The Light in the Forest             | Daugherty, Herschel  | Herschel Daugherty                  | tt0051864 |
| 1746512767 | 1910 | 1910 | Saved from the Redmen               | Saved from the Redmen               |                      | Fred J. Balshofer                   | tt0359939 |
| 1746584474 | 1928 | 1928 | We Americans                        | We Americans                        | Sloman, Edward       | Edward Sloman                       | tt0019555 |
| 1746581229 | 1910 | 1910 | Her Indian Mother                   | Her Indian Mother                   |                      | Sidney Olcott                       | tt0195776 |
| 1746198691 | 1969 | 1969 | Big Daddy                           | Big Daddy                           | Hittleman, Carl K.   | Carl K. Hittleman                   | tt0058968 |
| 1746475944 | 1948 | 1948 | Texas, Brooklyn & Heaven            | Texas, Brooklyn & Heaven            | Castle, William      | William Castle                      | tt0040868 |
| 1745309238 | 2007 | 2007 | Firehouse Dog                       | Firehouse Dog                       | Holland, Todd        | Todd Holland                        | tt0476995 |
| 1746520620 | 1926 | 1926 | Fools of Fashion                    | Fools of Fashion                    | McKay, James C.      | James C. McKay                      | tt0016892 |
| 1746514412 | 1927 | 1927 | Where Trails Begin                  | Where Trails Begin                  | Smith, Noel Mason    | Noel M. Smith                       | tt0179513 |
| 1746584335 | 1936 | 1936 | We're in the Legion Now             | We're in the Legion Now             | Wilbur, Crane        | Crane Wilbur                        | tt0028170 |
| 1746516325 | 1921 | 1921 | The Fighting Breed                  | The Fighting Breed                  | Lucas, Wilfred       | Wilfred Lucas                       | tt0012163 |
| 1746524152 | 1913 | 1913 | Shadows of the Moulin Rouge         | Shadows of the Moulin Rouge         | Blaché, Alice        | Alice Guy                           | tt0003365 |
| 1746208439 | 1969 | 1969 | The Secret of Santa Vittoria        | The Secret of Santa Vittoria        | Kramer, Stanley      | Stanley Kramer                      | tt0064952 |
| 1746520460 | 1927 | 1927 | The Understanding Heart             | The Understanding Heart             | Conway, Jack         | Jack Conway                         | tt0018525 |
| 1746394391 | 1992 | 1992 | Straight Talk                       | Straight Talk                       | Kellman, Barnet      | Barnet Kellman                      | tt0105481 |
| 1746509331 | 1924 | 1924 | The Rejected Woman                  | The Rejected Woman                  | Parker, Albert       | Albert Parker                       | tt0015270 |
| 1746495875 | 1921 | 1921 | Partners of the Tide                | Partners of the Tide                | Jefferson, L. V.     | L. V. Jefferson                     | tt0012553 |
| 1745357698 | 2010 | 2010 | Dahmer vs. Gacy                     | Dahmer vs. Gacy                     | Austin, Ford         | Ford Austin                         | tt1335986 |
| 1769970388 | 1964 | 1964 | Sinderella and the Golden Bra       | Sinderella and the Golden Bra       | Minardi, Loel        | Loel Minardi                        | tt0058590 |
| 1746484769 | 1919 | 1919 | Her Game                            | Her Game                            | Crane, Frank H.      | Frank Hall Crane                    | tt0010240 |
| 1746581796 | 1929 | 1929 | Is Everybody Happy?                 | Is Everybody Happy?                 | Mayo, Archie L.      | Archie Mayo                         | tt0020031 |
| 1746581820 | 1929 | 1929 | Show Boat                           | Show Boat                           | Pollard, Harry       | Harry A. Pollard                    | tt0020402 |
| 1746581465 | 1928 | 1928 | San Francisco Nights                | San Francisco Nights                | Neill, R. William    | Roy William Neill                   | tt0019351 |
| 1746500337 | 1927 | 1927 | The Rambling Ranger                 | The Rambling Ranger                 | Henderson, Del       | Dell Henderson                      | tt0018303 |
| 1746516072 | 1919 | 1919 | His Debt                            | His Debt                            | Worthington, William | William Worthington                 | tt0205128 |
| 1746454827 | 1946 | 1946 | Gun Town                            | Gun Town                            | Fox, Wallace W.      | Wallace Fox                         | tt0038579 |
| 1746520263 | 1949 | 1948 | She's Too Mean for Me               | She's Too Mean for Me               |                      |                                     | tt0135648 |
| 1746583405 | 1930 | 1930 | Going Wild                          | Going Wild                          | Seiter, William A.   | William A. Seiter                   | tt0020924 |
| 1769970796 | 1912 | 1912 | Under Mexican Skies                 | Under Mexican Skies                 | Anderson, G. M.      | Gilbert M. 'Broncho Billy' Anderson | tt0376290 |
| 1746569906 | 1958 | 1958 | The Long, Hot Summer                | The Long, Hot Summer                | Ritt, Martin         | Martin Ritt                         | tt0051878 |
| 1746574220 | 1961 | 1960 | The Wackiest Ship in the Army?      | The Wackiest Ship in the Army       | Murphy, Richard      | Richard Murphy                      | tt0054453 |
| 1746555931 | 1956 | 1956 | The Benny Goodman Story             | The Benny Goodman Story             | Davies, Valentine    | Valentine Davies                    | tt0047873 |
| 1746503058 | 1917 | 1917 | Modern Mother Goose                 | A Modern Mother Goose               | Betz, Matthew von    | Matthew Betz                        | tt0008308 |
| 1746584989 | 1940 | 1940 | Queen of the Yukon                  | Queen of the Yukon                  | Rosen, Phil          | Phil Rosen                          | tt0032959 |
| 1746261333 | 1981 | 1981 | All Night Long                      | All Night Long                      | Tramont, Jean-Claude | Jean                                | tt0082001 |
| 1746408830 | 1989 | 1989 | Ministry of Vengeance               | Ministry of Vengeance               | Maris, Peter         | Peter Maris                         | tt0097887 |
| 1746578941 | 1958 | 1958 | Screaming Mimi                      | Screaming Mimi                      | Oswald, Gerd         | Gerd Oswald                         | tt0052168 |
| 1746500911 | 1910 | 1910 | The Sheriff's Sacrifice             | The Sheriff's Sacrifice             |                      | Gilbert M. 'Broncho Billy' Anderson | tt0001394 |
| 1746573927 | 1962 | 1962 | The Miracle Worker                  | The Miracle Worker                  | Penn, Arthur         | Arthur Penn                         | tt0056241 |
| 1745271823 | 2000 | 2000 | Trois                               | Trois                               | Hardy, Rob           | Rob Hardy                           | tt0217107 |
| 1745271780 | 2000 | 2000 | The Skulls                          | The Skulls                          | Cohen, Rob           | Rob Cohen                           | tt0192614 |
| 1746569501 | 1953 | 1953 | The Silver Whip                     | The Silver Whip                     | Jones, Harmon        | Harmon Jones                        | tt0046317 |
| 1746435325 | 1992 | 1992 | Stop! Or My Mom Will Shoot          | Stop! Or My Mom Will Shoot          | Spottiswoode, Roger  | Roger Spottiswoode                  | tt0105477 |
| 1746434340 | 1996 | 1996 | Down Periscope                      | Down Periscope                      | Ward, David S.       | David S. Ward                       | tt0116130 |
| 1746498270 | 1920 | 1920 | The Scoffer                         | The Scoffer                         | Dwan, Allan          | Allan Dwan                          | tt0012654 |
| 1746438302 | 1944 | 1944 | Timber Queen                        | Timber Queen                        | McDonald, Frank      | Frank McDonald                      | tt0036440 |
| 1746515053 | 1910 | 1910 | The Tenderfoot Messenger            | The Tenderfoot Messenger            |                      | Gilbert M. 'Broncho Billy' Anderson | tt0001412 |
| 1746578020 | 1939 | 1939 | Babes in Arms                       | Babes in Arms                       | Berkeley, Busby      | Busby Berkeley                      | tt0031066 |
| 1746524145 | 1927 | 1927 | The Broncho Buster                  | The Broncho Buster                  | Laemmle, Ernst       | Ernst Laemmle                       | tt0017710 |
| 1746580465 | 1936 | 1936 | The Moon's Our Home                 | The Moon's Our Home                 | Seiter, William A.   | William A. Seiter                   | tt0027979 |
| 1746493451 | 1914 | 1914 | The \$5,000,000 Counterfeiting Plot | The \$5,000,000 Counterfeiting Plot | Harrison, Bertram    | Bertram Harrison                    | tt0003584 |
| 1746508022 | 1927 | 1927 | The Ladybird                        | The Ladybird                        | Lang, Walter         | Walter Lang                         | tt0018075 |
| 1746574451 | 1933 | 1933 | Should Ladies Behave                | Should Ladies Behave                | Beaumont, Harry      | Harry Beaumont                      | tt0024553 |
| 1746507751 | 1925 | 1925 | Bustin' Thru                        | Bustin' Thru                        | Smith, Clifford S.   | Clifford Smith                      | tt0015656 |
| 1746210246 | 1971 | 1971 | The Omega Man                       | The Omega Man                       | Sagal, Boris         | Boris Sagal                         | tt0067525 |
| 1746585420 | 1939 | 1939 | Dancing Co-Ed                       | Dancing Co Ed                       | Simon, S. Sylvan     | S. Sylvan Simon                     | tt0031203 |

|            |      |      |                               |                               |                                  |                      |           |
|------------|------|------|-------------------------------|-------------------------------|----------------------------------|----------------------|-----------|
| 1746509239 | 1949 | 1949 | Challenge to Lassie           | Challenge to Lassie           | Thorpe, Richard                  | Richard Thorpe       | tt0041238 |
| 1746571000 | 1934 | 1934 | The Merry Widow               | The Merry Widow               | Lubitsch, Ernst                  | Ernst Lubitsch       | tt0025493 |
| 1746217091 | 1966 | 1966 | Deux Voix                     | Deux Voix                     | Stevenson, Rosalind A.           | Rosalind Stevenson   | tt4666168 |
| 1746573844 | 1956 | 1956 | Hidden Guns                   | Hidden Guns                   | Gannaway, Al                     | Albert C. Gannaway   | tt0049311 |
| 1746491731 | 1946 | 1946 | The Strange Woman             | The Strange Woman             | Ulmer, Edgar                     | Edgar G. Ulmer       | tt0038990 |
| 1769969465 | 1911 | 1911 | The Imposter                  | The Imposter                  | Henderson, Lucius J.             | Lucius Henderson     | tt0408904 |
| 1746555127 | 1955 | 1954 | Green Fire                    | Green Fire                    | Marton, Andrew                   | Andrew Marton        | tt0047050 |
| 1746567793 | 1952 | 1952 | Mara Maru                     | Mara Maru                     | Douglas, Gordon                  | Gordon Douglas       | tt0044884 |
| 1746486467 | 1921 | 1921 | Skirts                        | Skirts                        | Del Ruth, Hampton                | Hampton Del Ruth     | tt0012698 |
| 1746486280 | 1921 | 1921 | Why Girls Leave Home          | Why Girls Leave Home          | Nigh, William                    | William Nigh         | tt0012846 |
| 1746581211 | 1961 | 1961 | Capture That Capsule!         | Capture That Capsule          | Zens, Will                       | Will Zens            | tt0054723 |
| 1746436376 | 1940 | 1940 | Half a Sinner                 | Half a Sinner                 | Christie, Al                     | Al Christie          | tt0032566 |
| 1746577195 | 1951 | 1951 | Flame of Stamboul             | Flame of Stamboul             | Nazzaro, Ray                     | Ray Nazarro          | tt0043543 |
| 1746235751 | 1978 | 1978 | Coma                          | Coma                          | Crichton, Michael                | Michael Crichton     | tt0077355 |
| 1746467791 | 1917 | 1917 | Paws of the Bear              | Paws of the Bear              | Barker, Reginald                 | Reginald Barker      | tt0008415 |
| 1746578030 | 1939 | 1939 | Hotel Imperial                | Hotel Imperial                | Florey, Robert                   | Robert Florey        | tt0031445 |
| 1746492221 | 1948 | 1948 | I Remember Mama               | I Remember Mama               | Stevens, George                  | George Stevens       | tt0040458 |
| 1746465176 | 1941 | 1941 | Smilin' Through               | Smilin' Through               | Borzage, Frank                   | Frank Borzage        | tt0034203 |
| 1746508129 | 1925 | 1925 | The Price of Pleasure         | The Price of Pleasure         | Sloman, Edward                   | Edward Sloman        | tt0016242 |
| 1746584952 | 1940 | 1940 | The Carson City Kid           | The Carson City Kid           | Kane, Joseph                     | Joseph Kane          | tt0032312 |
| 1746533178 | 1915 | 1915 | Stolen Goods                  | Stolen Goods                  | Melford, George                  | George Melford       | tt0006098 |
| 1746507862 | 1923 | 1923 | Is Money Everything?          | Is Money Everything?          | Lyons, Glen                      | Glen Lyons           | tt0014157 |
| 1746465243 | 1946 | 1945 | The Windjammer                | The Windjammer                | Landers, Lew                     | Lew Landers          | tt1572174 |
| 1746574926 | 1934 | 1934 | Wheels of Destiny             | Wheels of Destiny             | James, Alan                      | Alan James           | tt0025978 |
| 1769969543 | 1965 | 1965 | It's a Sick, Sick, Sick World | It's a Sick, Sick, Sick World | Scarpati, Antonio                | Antonio Scarpati     | tt0222047 |
| 1746465267 | 1943 | 1943 | Border Patrol                 | Border Patrol                 | Selander, Lesley                 | Lesley Selander      | tt0035692 |
| 1746554156 | 1964 | 1964 | Wild and Wonderful            | Wild and Wonderful            | Anderson, Michael                | Michael Anderson     | tt0058750 |
| 1746501396 | 1916 | 1916 | A Woman's Power               | A Woman's Power               | Thornby, Robert                  | Robert Thornby       | tt0159138 |
| 1746580333 | 1934 | 1934 | No Greater Glory              | No Greater Glory              | Borzage, Frank                   | Frank Borzage        | tt0025569 |
| 1746569587 | 1954 | 1954 | Four Guns to the Border       | Four Guns to the Border       | Carlson, Richard                 | Richard Carlson      | tt0046994 |
| 1746554685 | 1963 | 1963 | Take Her, She's Mine          | Take Her, She's Mine          | Koster, Henry                    | Henry Koster         | tt0057556 |
| 1746574656 | 1935 | 1935 | The Throwback                 | The Throwback                 | Taylor, Ray                      | Ray Taylor           | tt0027103 |
| 1746569577 | 1958 | 1958 | New Orleans After Dark        | New Orleans After Dark        | Sledge, John                     | John Sledge          | tt0051988 |
| 1746581113 | 1960 | 1960 | Heroes Die Young              | Heroes Die Young              | Shepard, Gerald S.               | Gerald Shepard       | tt0220513 |
| 1746235509 | 1976 | 1976 | Sparkle                       | Sparkle                       | O'Steen, Sam                     | Sam O'Steen          | tt0075249 |
| 1769970837 | 1915 | 1915 | The Mysterious Bride          | The Mysterious Bride          |                                  |                      | tt333296  |
| 1746580280 | 1934 | 1934 | Bombay Mail                   | Bombay Mail                   | Marin, Edwin L.                  | Edwin L. Marin       | tt0024904 |
| 1746574685 | 1935 | 1935 | A Night at the Ritz           | A Night at the Ritz           | McGann, William                  | William C. McGann    | tt0026779 |
| 1746577496 | 1933 | 1933 | Mazie                         | Mazie                         | Fitzgerald, Dallas M.            | Dallas M. Fitzgerald | tt0427512 |
| 1746520826 | 1925 | 1925 | The Pinch Hitter              | The Pinch Hitter              | Henabery, Joseph                 | Joseph Henabery      | tt0016224 |
| 1746523724 | 1916 | 1916 | The Woman in the Case         | The Woman in the Case         | Ford, Hugh                       | Hugh Ford            | tt0007580 |
| 1746208118 | 1969 | 1968 | Kenner                        | Kenner                        | Sekely, Steve                    | Steve Sekely         | tt0064539 |
| 1769972178 | 1961 | 1961 | The Touchables                | The Touchables                | Mann, Monte; Manning, Monroe, Sh | Monte Mann           | tt0055537 |
| 1746216942 | 1967 | 1967 | What Am I Bid?                | What Am I Bid?                | Nash, Gene                       | Gene Nash            | tt0062487 |
| 1746571086 | 1934 | 1934 | The Firebird                  | The Firebird                  | Dieterle, William                | William Dieterle     | tt0025119 |
| 1746419912 | 1993 | 1993 | The Dark Half                 | The Dark Half                 | Romero, George A.                | George A. Romero     | tt0106664 |
| 1746500520 | 1924 | 1924 | The Left Hand Brand           | The Left Hand Brand           | Hart, Neal                       | Neal Hart            | tt0135521 |
| 1746474086 | 1945 | 1945 | Blazing the Western Trail     | Blazing the Western Trail     | Keays, Vernon                    | Vernon Keays         | tt0191833 |
| 1746561303 | 1956 | 1956 | The Come On                   | The Come On                   | Birdwell, Russell                | Russell Birdwell     | tt0049089 |
| 1746423755 | 1996 | 1996 | When We Were Kings            | When We Were Kings            | Gast, Leon                       | Leon Gast            | tt0118147 |
| 1746569781 | 1953 | 1953 | The Charge at Feather River   | The Charge at Feather River   | Douglas, Gordon                  | Gordon Douglas       | tt0045621 |
| 1746582244 | 1928 | 1928 | On Trial                      | On Trial                      | Mayo, Archie                     | Archie Mayo          | tt0019233 |
| 1746583838 | 1929 | 1929 | Twin Beds                     | Twin Beds                     | Santell, Alfred                  | Alfred Santell       | tt0020524 |
| 1746583343 | 1930 | 1930 | The Big Pond                  | The Big Pond                  | Henley, Hobart                   | Hobart Henley        | tt0020690 |
| 1746500687 | 1924 | 1924 | The Uninvited Guest           | The Uninvited Guest           | Ince, Ralph                      | Ralph Ince           | tt0015447 |
| 1746580262 | 1937 | 1937 | Over the Goal                 | Over the Goal                 | Smith, Noel M.                   | Noel M. Smith        | tt0029364 |
| 1746393655 | 1986 | 1986 | Say Yes                       | Say Yes                       | Yust, Larry                      | Larry Yust           | tt0091896 |

|            |      |      |                                   |                                   |                                |                         |            |
|------------|------|------|-----------------------------------|-----------------------------------|--------------------------------|-------------------------|------------|
| 1746465392 | 1943 | 1943 | The Strange Death of Adolf Hitler | The Strange Death of Adolf Hitler | Hogan, James                   | James P. Hogan          | tt0036393  |
| 1746503256 | 1922 | 1922 | The Law and the Woman             | The Law and the Woman             | Stanlaws, Penrhyn              | Penrhyn Stanlaws        | tt0013307  |
| 1746424041 | 1941 | 1941 | Hold Back the Dawn                | Hold Back the Dawn                | Leisen, Mitchell               | Mitchell Leisen         | tt0033722  |
| 1746466802 | 1917 | 1917 | The Cook of Canyon Camp           | The Cook of Canyon Camp           | Crisp, Donald                  | Donald Crisp            | tt0168605  |
| 1746502165 | 1917 | 1917 | The Bad Boy                       | The Bad Boy                       | Withey, Chester                | Chester Withey          | tt0007673  |
| 1746565964 | 1955 | 1955 | The Eternal Sea                   | The Eternal Sea                   | Auer, John H.                  | John H. Auer            | tt0048047  |
| 1746575047 | 1933 | 1933 | Below the Sea                     | Below the Sea                     | Rogell, Albert                 | Albert S. Rogell        | tt0023793  |
| 1746509575 | 1924 | 1924 | Behind Two Guns                   | Behind Two Guns                   | Bradbury, Robert N.            | Robert N. Bradbury      | tt0014707  |
| 1746570762 | 1934 | 1934 | Going Spanish                     | Going Spanish                     | Christie, Al                   | Al Christie             | tt0025187  |
| 1746569547 | 1957 | 1957 | Chicago Confidential              | Chicago Confidential              | Salkow, Sidney                 | Sidney Salkow           | tt0050249  |
| 1746520056 | 1924 | 1924 | Shackles of Fear                  | Shackles of Fear                  | Ferguson, Al                   | Al Ferguson             | tt0015317  |
| 1746410214 | 1989 | 1989 | Gross Anatomy                     | Gross Anatomy                     | Eberhardt, Thom                | Thom Eberhardt          | tt0097458  |
| 1746500487 | 1923 | 1923 | Homeward Bound                    | Homeward Bound                    | Ince, Ralph                    | Ralph Ince              | tt0014138  |
| 1746438180 | 1996 | 1996 | Barb Wire                         | Barb Wire                         | Hogan, David                   | David Hogan             | tt0115624  |
| 1745340053 | 2004 | 2004 | Dodgeball: A True Underdog Story  | Dodgeball: A True Underdog Story  | Thurber, Rawson Marshall       | Rawson Marshall Thurber | tt0364725  |
| 1746501380 | 1917 | 1917 | Wild and Woolly                   | Wild and Woolly                   | Emerson, John                  | John Emerson            | tt0008775  |
| 1746578570 | 1951 | 1951 | Rhubarb                           | Rhubarb                           | Lubin, Arthur                  | Arthur Lubin            | tt0043967  |
| 1746545272 | 1940 | 1940 | Out West with the Peppers         | Out West with the Peppers         | Barton, Charles                | Charles Barton          | tt0032882  |
| 1746410171 | 1987 | 1986 | Blood Hook                        | Blood Hook                        | Mallon, James                  | Jim Mallon              | tt0090750  |
| 1746574019 | 1960 | 1960 | One Foot in Hell                  | One Foot in Hell                  | Clark, James B.                | James B. Clark          | tt0054142  |
| 1745293815 | 2005 | 2005 | King's Ransom                     | King's Ransom                     | Byrd, Jeff                     | Jeffrey W. Byrd         | tt0388183  |
| 1746578843 | 1951 | 1951 | The 13th Letter                   | The 13th Letter                   | Preminger, Otto                | Otto Preminger          | tt0043251  |
| 1746574359 | 1963 | 1963 | Captain Sinbad                    | Captain Sindbad                   | Haskin, Byron                  | Byron Haskin            | tt0056904  |
| 1746524456 | 1923 | 1923 | Outlaws of the Sea                | Outlaws of the Sea                | Okey, Jack                     | Jack Okey               | tt0145952  |
| 1746495601 | 1918 | 1918 | Come on in                        | Come on In                        | Emerson, John                  | John Emerson            | tt0008973  |
| 1746217739 | 1967 | 1967 | Barefoot in the Park              | Barefoot in the Park              | Saks, Gene                     | Gene Saks               | tt0061385  |
| 1745340271 | 2004 | 2004 | Along Came Polly                  | Along Came Polly                  | Hamburg, John                  | John Hamburg            | tt0343135  |
| 1746560595 | 1932 | 1932 | The Man Called Back               | The Man Called Back               | Florey, Robert                 | Robert Florey           | tt0023179  |
| 1745271893 | 2000 | 2000 | Ready to Rumble                   | Ready to Rumble                   | Robbins, Brian                 | Brian Robbins           | tt0217756  |
| 1746583076 | 1935 | 1934 | Western Racketeers                | Western Racketeers                | Horner, Robert J.              | Robert J. Horner        | tt0240204  |
| 1746502164 | 1914 | 1914 | The School for Scandal            | The School for Scandal            | Buel, Keanan                   | Keanan Buel             | tt0004565  |
| 1769970441 | 1966 | 1965 | Censored                          | Censored                          | Frost, R. L.                   | Barry Mahon             | tt0171161  |
| 1746569514 | 1957 | 1957 | The Hired Gun                     | The Hired Gun                     | Nazarro, Ray                   | Ray Nazarro             | tt0050510  |
| 1746566318 | 1953 | 1953 | Thunder Bay                       | Thunder Bay                       | Mann, Anthony                  | Anthony Mann            | tt0046425  |
| 1746569988 | 1958 | 1957 | Bitter Victory                    | Bitter Victory                    | Ray, Nicholas                  | Nicholas Ray            | tt0050126  |
| 1746577965 | 1936 | 1936 | Wife Vs. Secretary                | Wife vs. Secretary                | Brown, Clarence                | Clarence Brown          | tt0028505  |
| 1746577454 | 1962 | 1962 | Invasion of the Star Creatures    | Invasion of the Star Creatures    | Ve Sota, Bruno                 | Bruno VeSota            | tt0128274  |
| 1746453578 | 1945 | 1945 | And Then There Were None          | And Then There Were None          | Clair, René                    | René Clair              | tt0037515  |
| 1746465236 | 1941 | 1941 | Up Jumped the Devil               | Up Jumped the Devil               |                                | William Beaudine        | tt0316838  |
| 1746434621 | 1992 | 1992 | Mr. Baseball                      | Mr. Baseball                      | Schepisi, Fred                 | Fred Schepisi           | tt0104926  |
| 1746564740 | 1952 | 1952 | Bomba and the Jungle Girl         | Bomba and the Jungle Girl         | Beebe, Ford                    | Ford Beebe              | tt0044435  |
| 1746491701 | 1945 | 1945 | The Fatal Witness                 | The Fatal Witness                 | Selander, Lesley               | Lesley Selander         | tt0037693  |
| 1745293719 | 2006 | 2005 | Tweek City                        | Tweek City                        | Johnson, Eric G.               | Eric G. Johnson         | tt00351885 |
| 1746497241 | 1919 | 1919 | Happiness À La Mode               | Happiness a la Mode               | Edwards, Walter                | Walter Edwards          | tt0010207  |
| 1746576960 | 1959 | 1959 | Street Fighter                    | Street Fighter                    | Savage, Vic                    | Joseph Sargent          | tt0053311  |
| 1746513395 | 1914 | 1914 | The Sign of the Cross             | The Sign of the Cross             | Thomson, Frederick             | Frederick A. Thomson    | tt0004593  |
| 1746530706 | 1949 | 1949 | Streets of Laredo                 | Streets of Laredo                 | Fenton, Leslie                 | Leslie Fenton           | tt0041929  |
| 1746585406 | 1940 | 1940 | They Drive by Night               | They Drive by Night               | Walsh, Raoul                   | Raoul Walsh             | tt0033149  |
| 1746232950 | 1966 | 1966 | Who's Afraid of Virginia Woolf?   | Who's Afraid of Virginia Woolf?   | Nichols, Mike                  | Mike Nichols            | tt0061184  |
| 1746423289 | 1990 | 1990 | Quick Change                      | Quick Change                      | Franklin, Howard; Murray, Bill | Howard Franklin         | tt0100449  |
| 1746516514 | 1919 | 1918 | A Woman's Experience              | A Woman's Experience              | Vekroff, Perry N.              | Perry N. Vekroff        | tt0009836  |
| 1746524566 | 1916 | 1916 | True Nobility                     | True Nobility                     | MacDonald, Donald              | Donald MacDonald        | tt0159054  |
| 1746578901 | 1959 | 1959 | These Thousand Hills              | These Thousand Hills              | Fleischer, Richard             | Richard Fleischer       | tt0053350  |
| 1746495977 | 1919 | 1919 | Girls                             | Girls                             | Edwards, Walter                | Walter Edwards          | tt0010175  |
| 1746436276 | 2000 | 2000 | Bait                              | Bait                              | Fuqua, Antoine                 | Antoine Fuqua           | tt0211938  |
| 1746465388 | 1946 | 1946 | Colonel Effingham's Raid          | Colonel Effingham's Raid          | Pichel, Irving                 | Irving Pichel           | tt0037607  |
| 1746577355 | 1961 | 1961 | The Purple Hills                  | The Purple Hills                  | Dexter, Maury                  | Maury Dexter            | tt0055343  |

|            |      |      |                                        |                                        |                                    |                        |           |
|------------|------|------|----------------------------------------|----------------------------------------|------------------------------------|------------------------|-----------|
| 1746434005 | 1997 | 1996 | The Mouse                              | The House                              | Adams, Daniel                      | Keane Groisman         | tt6443944 |
| 1746421959 | 1994 | 1994 | Milk Money                             | Milk Money                             | Benjamin, Richard                  | Richard Benjamin       | tt0110516 |
| 1746491859 | 1946 | 1946 | Murder Is My Business                  | Murder Is My Business                  | Newfield, Sam                      | Sam Newfield           | tt0038757 |
| 1746574768 | 1937 | 1937 | True Confession                        | True Confession                        | Ruggles, Wesley                    | Wesley Ruggles         | tt0029695 |
| 1746562209 | 1953 | 1953 | Killer Ape                             | Killer Ape                             | Bennet, Spencer G.                 | Spencer Gordon Bennet  | tt0045959 |
| 1746507585 | 1924 | 1924 | Monsieur Beaucaire                     | Monsieur Beaucaire                     | Olcott, Sidney                     | Sidney Olcott          | tt0015145 |
| 1746582957 | 1939 | 1939 | Death of a Champion                    | Death of a Champion                    | Florey, Robert                     | Robert Florey          | tt0031221 |
| 1746492422 | 1946 | 1946 | Girl on the Spot                       | Girl on the Spot                       | Beaudine, William                  | William Beaudine       | tt0038073 |
| 1746565876 | 1953 | 1953 | The Living Desert                      | The Living Desert                      | Algar, James                       | James Algar            | tt0046008 |
| 1746437287 | 1940 | 1940 | The Farmer's Daughter                  | The Farmer's Daughter                  | Hogan, James                       | James P. Hogan         | tt0032456 |
| 1746500155 | 1949 | 1948 | Command Decision                       | Command Decision                       | Wood, Sam                          | Sam Wood               | tt0040242 |
| 1746410757 | 1992 | 1992 | Passion Fish                           | Passion Fish                           | Sayles, John                       | John Sayles            | tt0105107 |
| 1746566917 | 1953 | 1952 | Bwana Devil                            | Bwana Devil                            | Oboler, Arch                       | Arch Oboler            | tt0044462 |
| 1746525198 | 1920 | 1920 | Peaceful Valley                        | Peaceful Valley                        | Storm, Jerome                      | Jerome Storm           | tt0011563 |
| 1746571910 | 1932 | 1932 | Doctor X                               | Doctor X                               | Curtiz, Michael                    | Michael Curtiz         | tt0022827 |
| 1746504342 | 1918 | 1918 | Confession                             | Confession                             | Franklin, S. A.                    | Sidney Franklin        | tt0008974 |
| 1746409708 | 1992 | 1992 | Feed                                   | Feed                                   | Rafferty, Kevin; Ridgeway, James   | Kevin Rafferty         | tt0104244 |
| 1746503961 | 1921 | 1921 | Closed Doors                           | Closed Doors                           | Seyffertitz, G. V.                 | Gustav von Seyffertitz | tt0012056 |
| 1769970570 | 1968 | 1968 | The Kiss of Her Flesh                  | The Kiss of Her Flesh                  | Marsh, Julian                      | Michael Findlay        | tt0125316 |
| 1746578427 | 1962 | 1962 | Air Patrol                             | Air Patrol                             | Dexter, Maury                      | Maury Dexter           | tt0055731 |
| 1746455277 | 1996 | 1995 | Welcome to the Dollhouse               | Welcome to the Dollhouse               | Solondz, Todd                      | Todd Solondz           | tt0114906 |
| 1746583515 | 1930 | 1930 | Call of the Flesh                      | Call of the Flesh                      | Brabin, Charles                    | Charles Brabin         | tt0020724 |
| 1745302274 | 2005 | 2005 | Reel Paradise                          | Reel Paradise                          | James, Steve                       | Steve James            | tt0405271 |
| 1746580328 | 1938 | 1938 | Say It in French                       | Say It in French                       | Stone, Andrew L.                   | Andrew L. Stone        | tt0030718 |
| 1746453609 | 1943 | 1943 | Idaho                                  | Idaho                                  | Kane, Joseph                       | Joseph Kane            | tt0036033 |
| 1745358640 | 2010 | 2010 | She's Out of My League                 | She's Out of My League                 | Smith, Jim Field                   | Jim Field Smith        | tt0815236 |
| 1746422074 | 1995 | 1995 | Strange Days                           | Strange Days                           | Bigelow, Kathryn                   | Kathryn Bigelow        | tt0114558 |
| 1746512135 | 1916 | 1916 | When the Circus Came to Town           | When the Circus Came to Town           | Smith, Sidney                      | Sidney Smith           | tt0434636 |
| 1746524241 | 1917 | 1917 | Bringing Home Father                   | Bringing Home Father                   | Worthington, William               | William Worthington    | tt0007749 |
| 1746571102 | 1935 | 1935 | Hop-Along Cassidy                      | Hop a Long Cassidy                     | Bretherton, Howard                 | Howard Bretherton      | tt0026493 |
| 1746514393 | 1916 | 1916 | The Fear of Poverty                    | The Fear of Poverty                    | Sullivan, Frederic                 | Frederick Sullivan     | tt0157622 |
| 1746568130 | 1934 | 1934 | Flirting with Danger                   | Flirting with Danger                   | Moore, Vin                         | Vin Moore              | tt0025125 |
| 1746533166 | 1915 | 1915 | The Cowboy and the Lady                | The Cowboy and the Lady                | Carewe, Edwin                      | Edwin Carewe           | tt0005151 |
| 1746584270 | 1939 | 1939 | Pride of the Navy                      | Pride of the Navy                      | Lamont, Charles                    | Charles Lamont         | tt0031824 |
| 1746566073 | 1956 | 1956 | Hilda Crane                            | Hilda Crane                            | Dunne, Philip                      | Philip Dunne           | tt0049317 |
| 1746503808 | 1920 | 1920 | Beyond the Great Wall                  | Beyond the Great Wall                  | Heath, A. B.                       | Arch Heath             | tt0193767 |
| 1746491885 | 1944 | 1944 | The Battle of China                    | The Battle of China                    |                                    | Frank Capra            | tt0184254 |
| 1745293313 | 2006 | 2006 | Man of the Year                        | Man of the Year                        | Levinson, Barry                    | Barry Levinson         | tt0483726 |
| 1746465119 | 1947 | 1947 | The Peanut Man                         | The Peanut Man                         | Paton, Tony                        |                        | tt0135595 |
| 1746578947 | 1963 | 1963 | Monstrosity                            | Monstrosity                            | Mascelli, Joseph V.                | Joseph V. Mascelli     | tt0057859 |
| 1746454654 | 1940 | 1940 | Private Affairs                        | Private Affairs                        | Rogell, Albert S.                  | Albert S. Rogell       | tt0032947 |
| 1746219620 | 1972 | 1972 | FTA                                    | FTA                                    | Parker, Francine                   | Francine Parker        | tt0068562 |
| 1746583069 | 1935 | 1935 | Baby Face Harrington                   | Baby Face Harrington                   | Walsh, Raoul                       | Raoul Walsh            | tt0026092 |
| 1746507774 | 1927 | 1926 | The Scarlet Letter                     | The Scarlet Letter                     | Seastrom, Victor                   | Victor Sjöström        | tt0017350 |
| 1746474820 | 1945 | 1945 | The House on 92nd Street               | The House on 92nd Street               | Hathaway, Henry                    | Henry Hathaway         | tt0037795 |
| 1746520895 | 1948 | 1948 | To the Ends of the Earth               | To the Ends of the Earth               | Stevenson, Robert; Buchman, Sidney | Robert Stevenson       | tt0040887 |
| 1746423278 | 1994 | 1994 | Shrunken Heads                         | Shrunken Heads                         | Elfman, Richard                    | Richard Elfman         | tt0111175 |
| 1746562342 | 1953 | 1953 | The Hitch-Hiker                        | The Hitch Hiker                        | Lupino, Ida                        | Ida Lupino             | tt0045877 |
| 2007990110 | 1993 | 1993 | The Thing Called Love                  | The Thing Called Love                  | Bogdanovich, Peter                 | Peter Bogdanovich      | tt0108327 |
| 1745359670 | 2004 | 2004 | Agent Cody Banks 2: Destination London | Agent Cody Banks 2: Destination London | Allen, Kevin                       | Kevin Allen            | tt0358349 |
| 1746523315 | 1922 | 1922 | Isle of Doubt                          | Isle of Doubt                          | Smith, Hamilton                    | Hamilton Smith         | tt0013273 |
| 1746567464 | 1933 | 1933 | Thunder over Mexico                    | Thunder Over Mexico                    | Eisenstein, Sergei M.              | Sergei M. Eisenstein   | tt0024668 |
| 1746574791 | 1935 | 1935 | It Happened in New York                | It Happened in New York                | Crosland, Alan                     | Alan Crosland          | tt0026535 |
| 1746393970 | 1986 | 1986 | The Morning After                      | The Morning After                      | Lumet, Sidney                      | Sidney Lumet           | tt0091554 |
| 1746210472 | 1972 | 1972 | Ben                                    | Ben                                    | Karlson, Phil                      | Phil Karlson           | tt0068264 |
| 1746580221 | 1939 | 1939 | The Hunchback of Notre Dame            | The Hunchback of Notre Dame            | Dieterle, William                  | William Dieterle       | tt0031455 |
| 1746570309 | 1934 | 1934 | Beggar's Holiday                       | Beggar's Holiday                       | Newfield, Sam                      | Sam Newfield           | tt0024869 |

|                   |             |             |                                                 |                                           |                                   |                     |                  |
|-------------------|-------------|-------------|-------------------------------------------------|-------------------------------------------|-----------------------------------|---------------------|------------------|
| 1746565909        | 1954        | 1954        | The Iron Glove                                  | The Iron Glove                            | Castle, William                   | William Castle      | tt0047121        |
| 1746582718        | 1935        | 1935        | Border Brigands                                 | Border Brigands                           | Grinde, Nick                      | Nick Grinde         | tt0026127        |
| 1746562073        | 1954        | 1954        | Silent Raiders                                  | Silent Raiders                            | Bartlett, Richard                 | Richard Bartlett    | tt0047492        |
| 1746571934        | 1931        | 1931        | The Spy                                         | The Spy                                   | Viertel, Berthold                 | Berthold Viertel    | tt0022427        |
| 1746491872        | 1946        | 1946        | Sweetheart of Sigma Chi                         | Sweetheart of Sigma Chi                   | Bernhard, Jack                    | Jack Bernhard       | tt0039002        |
| 1746209253        | 1967        | 1967        | How to Succeed in Business Without Really Tryin | How to Succeed in Business Without Really | Swift, David                      | David Swift         | tt0061791        |
| 1746438166        | 1941        | 1941        | Border Vigilantes                               | Border Vigilantes                         | Abrahams, Derwin                  | Derwin Abrahams     | tt0033425        |
| 1746532983        | 1915        | 1915        | The Cave Man                                    | The Cave Man                              | Marston, Theodore                 | Theodore Marston    | tt0005070        |
| 1746513389        | 1913        | 1913        | The Battle of Gettysburg                        | The Battle of Gettysburg                  | Ince, Thomas H.                   | Charles Giblyn      | tt0002669        |
| 1746582925        | 1937        | 1937        | The Legion of Missing Men                       | The Legion of Missing Men                 | MacFadden, Hamilton               | Hamilton MacFadden  | tt0029130        |
| 1746495955        | 1921        | 1921        | The Passion Flower                              | Passion Flower                            | Brenon, Herbert                   | Herbert Brenon      | tt0012555        |
| 1746570048        | 1933        | 1933        | The Mind Reader                                 | The Mind Reader                           | Del Ruth, Roy                     | Roy Del Ruth        | tt0024339        |
| 1746419617        | 1992        | 1992        | Roadside Prophets                               | Roadside Prophets                         | Wool, Abbe                        | Abbe Wool           | tt0105267        |
| 1769970544        | 1966        | 1966        | Unholy Matrimony                                | Unholy Matrimony                          | John, Arthur                      | Arthur John         | tt0153446        |
| 1746455289        | 1996        | 1996        | Bound                                           | Bound                                     | Wachowski, Larry; Wachowski, Andy | Lana Wachowski      | tt0115736        |
| 1746257773        | 1980        | 1980        | Times Square                                    | Times Square                              | Moyle, Alan                       | Allan Moyle         | tt0081635        |
| 1746453834        | 1944        | 1944        | Thoroughbreds                                   | Thoroughbreds                             | Blair, George                     | George Blair        | tt0037369        |
| 1746581522        | 1928        | 1928        | West of Zanzibar                                | West of Zanzibar                          | Browning, Tod                     | Tod Browning        | tt0019563        |
| 1746492052        | 1948        | 1948        | The Return of the Whistler                      | The Return of the Whistler                | Lederman, D. Ross                 | D. Ross Lederman    | tt0040733        |
| 1746454677        | 1942        | 1942        | Stagecoach Buckaroo                             | Stagecoach Buckaroo                       | Taylor, Ray                       | Ray Taylor          | tt0035376        |
| 1746513803        | 1915        | 1915        | The Case of Becky                               | The Case of Becky                         | Reicher, Frank                    | Frank Reicher       | tt0005063        |
| 1746500604        | 1925        | 1925        | Pursued                                         | Pursued                                   | Henderson, Dell                   | Dell Henderson      | tt0016254        |
| 1745339983        | 2003        | 2003        | School of Rock                                  | School of Rock                            | Linklater, Richard                | Richard Linklater   | tt0332379        |
| 1746574881        | 1936        | 1936        | Freshman Love                                   | Freshman Love                             | McGann, William                   | William C. McGann   | tt0027645        |
| 1746585411        | 1939        | 1939        | El Diablo Rides                                 | El Diablo Rides                           | Webb, Ira S.                      | Ira Webb            | tt0031267        |
| 1746185598        | 1966        | 1966        | Namu, the Killer Whale                          | Namu, the Killer Whale                    | Benedek, Laslo                    | Laslo Benedek       | tt0060737        |
| 1746513031        | 1910        | 1910        | On the Reef                                     | On the Reef                               | Griffith, D. W.                   | D.W. Griffith       | tt0001345        |
| 1746523329        | 1923        | 1923        | The Law Rustlers                                | The Law Rustlers                          | King, Lewis                       | Louis King          | tt0126996        |
| 1746503456        | 1919        | 1919        | The Great Air Robbery                           | The Great Air Robbery                     | Jaccard, Jacques                  | Jacques Jaccard     | tt0011241        |
| 1746420221        | 1994        | 1994        | Surviving the Game                              | Surviving the Game                        | Dickerson, Ernest                 | Ernest R. Dickerson | tt0111323        |
| 1746570028        | 1934        | 1934        | Big Hearted Herbert                             | Big Hearted Herbert                       | Keighley, William                 | William Keighley    | tt0024892        |
| 1745340039        | 2003        | 2003        | The In-Laws                                     | The In Laws                               | Fleming, Andrew                   | Andrew Fleming      | tt0314786        |
| 1746568126        | 1933        | 1933        | Jungle Bride                                    | Jungle Bride                              | Hoyt, Harry O.; Kelley, Albert    | Harry O. Hoyt       | tt0024199        |
| 1745272342        | 2000        | 1999        | The Sky Is Falling                              | The Sky Is Falling                        | Laurence, Florrie                 | Florrie Laurence    | tt0120829        |
| 1746577538        | 1936        | 1936        | A Face in the Fog                               | A Face in the Fog                         | Hill, Bob                         | Robert F. Hill      | tt0144191        |
| 1746578864        | 1951        | 1951        | Texas Lawmen                                    | Texas Lawmen                              | Collins, Lewis                    | Lewis D. Collins    | tt0180243        |
| 1746563634        | 1952        | 1952        | The Snows of Kilimanjaro                        | The Snows of Kilimanjaro                  | King, Henry                       | Henry King          | tt0045162        |
| <b>1746532723</b> | <b>1927</b> | <b>1927</b> | <b>Combat</b>                                   | <b>Combat</b>                             | <b>Hiatt, Albert</b>              | <b>Albert Hiatt</b> | <b>tt0017768</b> |
| 1746532985        | 1923        | 1923        | Safety Last!                                    | Safety Last!                              | Newmeyer, Fred; Taylor, Sam       | Fred C. Newmeyer    | tt0014429        |
| 1746504005        | 1922        | 1922        | Lucky Dan                                       | Lucky Dan                                 | Howard, William K.                | William K. Howard   | tt0013340        |
| 1746503600        | 1918        | 1918        | The Cabaret Girl                                | The Cabaret Girl                          | Gerrard, Douglas                  | Douglas Gerrard     | tt0008943        |
| 1746498306        | 1920        | 1920        | Drag Harlan                                     | Drag Harlan                               | Edwards, J. Gordon                | J. Gordon Edwards   | tt0011133        |
| 1746573852        | 1958        | 1957        | Appointment with a Shadow                       | Appointment with a Shadow                 | Carlson, Richard                  | Richard Carlson     | tt0051370        |
| 1746574153        | 1961        | 1961        | The Cat Burglar                                 | The Cat Burglar                           | Witney, William                   | William Witney      | tt0054733        |
| 1746583056        | 1939        | 1939        | Mystery of the White Room                       | Mystery of the White Room                 | Garrett, Otis                     | Otis Garrett        | tt0031705        |
| 1746500713        | 1924        | 1924        | Try and Get It                                  | Try and Get It                            | Tate, Cullen                      | Cullen Tate         | tt0015439        |
| 1746438620        | 1943        | 1943        | Ladies' Day                                     | Ladies' Day                               | Goodwins, Leslie                  | Leslie Goodwins     | tt0036091        |
| 1746218744        | 1976        | 1976        | Revenge of the Cheerleaders                     | Revenge of the Cheerleaders               | Lerner, Richard                   | Richard Lerner      | tt0075137        |
| 1746520855        | 1925        | 1925        | The Unknown Lover                               | The Unknown Lover                         | Halperin, Victor Hugo             | Victor Halperin     | tt0016475        |
| 1746501775        | 1915        | 1915        | The Stubbornness of Geraldine                   | The Stubbornness of Geraldine             | Mervale, Gaston                   | Gaston Mervale      | tt0006112        |
| 1746523075        | 1914        | 1914        | The Key to Yesterday                            | The Key to Yesterday                      | Dillon, J. Francis                | John Francis Dillon | tt0004188        |
| 1746492571        | 1948        | 1948        | The Gentleman from Nowhere                      | The Gentleman from Nowhere                | Castle, William                   | William Castle      | tt0040386        |
| 1746514569        | 1927        | 1927        | Yours To Command                                | Yours to Command                          | Kirkland, David                   | David Kirkland      | tt0018605        |
| 1746584595        | 1931        | 1931        | Rich Man's Folly                                | Rich Man's Folly                          | Cromwell, John                    | John Cromwell       | tt0022309        |
| 1746567616        | 1933        | 1933        | Marriage on Approval                            | Marriage on Approval                      | Higgin, Howard                    | Howard Higgin       | tt0129226        |
| 1746465030        | 1943        | 1943        | Wintertime                                      | Wintertime                                | Brahm, John                       | John Brahm          | tt0036540        |
| 1746580792        | 1935        | 1935        | Murder on a Honeymoon                           | Murder on a Honeymoon                     | Corrigan, Lloyd                   | Lloyd Corrigan      | tt0026744        |

|            |      |      |                             |                             |                                        |                      |           |
|------------|------|------|-----------------------------|-----------------------------|----------------------------------------|----------------------|-----------|
| 1746584029 | 1935 | 1935 | Clive of India              | Clive of India              | Boleslawski, Richard                   | Richard Boleslawski  | tt0026221 |
| 1746562284 | 1953 | 1953 | The Fighting Lawman         | Fighting Lawman             | Carr, Thomas                           | Thomas Carr          | tt0045766 |
| 1746464965 | 1945 | 1945 | Sagebrush Heroes            | Sagebrush Heroes            | Kline, Benjamin                        | Benjamin H. Kline    | tt0037241 |
| 1746504736 | 1922 | 1922 | Between Two Husbands        | Between Two Husbands        |                                        |                      | tt0012934 |
| 1746577282 | 1958 | 1958 | Frontier Gun                | Frontier Gun                | Landres, Paul                          | Paul Landres         | tt0051639 |
| 1746454620 | 1940 | 1940 | Bad Man from Red Butte      | Bad Man from Red Butte      | Taylor, Ray                            | Ray Taylor           | tt0032232 |
| 1746420363 | 1990 | 1990 | Goodfellas                  | Goodfellas                  | Scorsese, Martin                       | Martin Scorsese      | tt0099685 |
| 1746513426 | 1916 | 1916 | The Summer Girl             | The Summer Girl             | August, Edwin                          | Edwin August         | tt0007408 |
| 1746455048 | 1999 | 1999 | End of Days                 | End of Days                 | Hyams, Peter                           | Peter Hyams          | tt0146675 |
| 1746583536 | 1929 | 1929 | Hunting Tigers in India     | Hunting Tigers in India     | Dyott, George M.; Meehan, Leo          | James Leo Meehan     | tt0295998 |
| 1746500215 | 1925 | 1925 | Bobbed Hair                 | Bobbed Hair                 | Crosland, Alan                         | Alan Crosland        | tt0015632 |
| 1746492407 | 1948 | 1948 | The Babe Ruth Story         | The Babe Ruth Story         | Del Ruth, Roy                          | Roy Del Ruth         | tt0040142 |
| 1746584473 | 1931 | 1931 | Graft                       | Graft                       | Cabanne, Christy                       | Christy Cabanne      | tt0021926 |
| 1746437021 | 1941 | 1941 | Skylark                     | Skylark                     | Sandrich, Mark                         | Mark Sandrich        | tt0034198 |
| 1746502446 | 1910 | 1910 | A Woman's Wit               | A Woman's Wit               |                                        | Joseph A. Golden     | tt0291568 |
| 1746560975 | 1932 | 1932 | Texas Cyclone               | Texas Cyclone               | Lederman, D. Ross                      | D. Ross Lederman     | tt0023567 |
| 1746514622 | 1915 | 1915 | M'Liss                      | M'Liss                      | Lund, O. A. C.                         | O.A.C. Lund          | tt0005671 |
| 1746421669 | 1999 | 1999 | The Other Sister            | The Other Sister            | Marshall, Garry                        | Garry Marshall       | tt0123209 |
| 1746269675 | 1979 | 1979 | Starting Over               | Starting Over               | Pakula, Alan J.                        | Alan J. Pakula       | tt0079948 |
| 1746580693 | 1938 | 1938 | Storm over Bengal           | Storm Over Bengal           | Salkow, Sidney                         | Sidney Salkow        | tt0030798 |
| 1746573838 | 1957 | 1957 | Hell on Devil's Island      | Hell on Devil's Island      | Nyby, Christian                        | Christian Nyby       | tt0050498 |
| 1746571672 | 1931 | 1931 | The Forgotten Frontier      | The Forgotten Frontier      |                                        | Marvin Breckinridge  | tt0021881 |
| 1746514815 | 1923 | 1923 | None So Blind               | None So Blind               | King, Burton                           | Burton L. King       | tt0014315 |
| 1746582505 | 1939 | 1939 | The Little Princess         | The Little Princess         | Lang, Walter                           | Walter Lang          | tt0031580 |
| 1746516067 | 1921 | 1921 | Hush                        | Hush                        | Garson, Harry                          | Harry Garson         | tt0012299 |
| 1746584644 | 1928 | 1928 | The Girl He Didn't Buy      | The Girl He Didn't Buy      | Fitzgerald, Dallas M.                  | Dallas M. Fitzgerald | tt0133801 |
| 1746582278 | 1930 | 1930 | The Midnight Special        | Midnight Special            | Worne, Duke                            | Duke Worne           | tt0022148 |
| 1746504014 | 1922 | 1922 | Minnie                      | Minnie                      |                                        | Marshall Neilan      | tt0013392 |
| 1769974306 | 1916 | 1916 | Billie's Headache           | Billie's Headache           | Metcalfe, Earl                         | Earl Metcalfe        | tt0416576 |
| 1746565927 | 1957 | 1957 | The Careless Years          | The Careless Years          | Hiller, Arthur                         | Arthur Hiller        | tt0050229 |
| 1745341803 | 2001 | 2001 | Sidewalks of New York       | Sidewalks of New York       | Burns, Edward                          | Edward Burns         | tt0239986 |
| 1746560620 | 1932 | 1932 | The King Murder             | The King Murder             | Thorpe, Richard                        | Richard Thorpe       | tt0023092 |
| 1769971972 | 1969 | 1969 | Switcheroo!                 | Switcheroo!                 | Donne, John                            | Donn Greer           | tt0259022 |
| 1745395420 | 2010 | 2009 | Solitary Man                | Solitary Man                | Koppelman, Brian; Levien, David        | Brian Koppelman      | tt1294213 |
| 1746497227 | 1921 | 1921 | Dawn of the East            | Dawn of the East            | Griffith, E. H.                        | Edward H. Griffith   | tt0012097 |
| 1746500451 | 1924 | 1924 | Sinners in Heaven           | Sinners in Heaven           | Crosland, Alan                         | Alan Crosland        | tt0015335 |
| 1746583770 | 1930 | 1930 | The Convict's Code          | Convict's Code              | Revier, Harry                          | Harry Revier         | tt0020788 |
| 1746583295 | 1929 | 1929 | A Song of Kentucky          | A Song of Kentucky          | Seiler, Lewis                          | Lewis Seiler         | tt0020433 |
| 1746218246 | 1968 | 1967 | Will Penny                  | Will Penny                  | Gries, Tom                             | Tom Gries            | tt0063811 |
| 1746465308 | 1945 | 1945 | An Angel Comes to Brooklyn  | An Angel Comes to Brooklyn  | Goodwins, Leslie                       | Leslie Goodwins      | tt0037516 |
| 1746234083 | 1967 | 1967 | C'mon, Let's Live a Little  | C'mon, Let's Live a Little  | Butler, David                          | David Butler         | tt0061434 |
| 1746524022 | 1927 | 1927 | The Devil Dancer            | The Devil Dancer            | Niblo, Fred; Raboch, Alfred; Shores, I | Fred Niblo           | tt0017806 |
| 1746554190 | 1964 | 1964 | The Night of the Iguana     | The Night of the Iguana     | Huston, John                           | John Huston          | tt0058404 |
| 1746508482 | 1926 | 1926 | The Temptress               | The Temptress               | Stiller, Mauritz                       | Fred Niblo           | tt0017449 |
| 1746502193 | 1915 | 1915 | The Hungarian Nabob         | The Hungarian Nabob         | Vale, Travers                          | Travers Vale         | tt0005525 |
| 1746453832 | 1942 | 1942 | Cowboy Serenade             | Cowboy Serenade             | Morgan, William                        | William Morgan       | tt0034619 |
| 1745293506 | 2007 | 2007 | Things We Lost in the Fire  | Things We Lost in the Fire  | Bier, Susanne                          | Susanne Bier         | tt0469623 |
| 1746569544 | 1957 | 1957 | Something of Value          | Something of Value          | Brooks, Richard                        | Richard Brooks       | tt0050993 |
| 1746513816 | 1923 | 1923 | Thru the Flames             | Thru the Flames             | Nelson, Jack                           | Jack Nelson          | tt0170683 |
| 1746513780 | 1915 | 1915 | The Fixer                   | The Fixer                   |                                        | Edward Morrissey     | tt0447151 |
| 1746473703 | 1946 | 1946 | Shadowed                    | Shadowed                    | Sturges, John                          | John Sturges         | tt0038928 |
| 1769969388 | 1965 | 1965 | The Girl With the Magic Box | The Girl with the Magic Box | Mahon, Barry                           | Barry Mahon          | tt0262434 |
| 1746501671 | 1915 | 1915 | Dr. Rameau                  | Dr. Rameau                  | Davis, Will S.                         | Will S. Davis        | tt0005216 |
| 1746500166 | 1949 | 1949 | Prince of Foxes             | Prince of Foxes             | King, Henry                            | Henry King           | tt0041767 |
| 1746453839 | 1944 | 1944 | Wing and a Prayer           | Wing and a Prayer           | Hathaway, Henry                        | Henry Hathaway       | tt0037466 |
| 1746524630 | 1910 | 1910 | Senator's Double            | The Senator's Double        |                                        | Harry Solter         | tt0201077 |
| 1746454842 | 1941 | 1941 | The Chocolate Soldier       | The Chocolate Soldier       | Del Ruth, Roy                          | Roy Del Ruth         | tt0033464 |



|                   |             |             |                              |                              |                        |                       |                  |
|-------------------|-------------|-------------|------------------------------|------------------------------|------------------------|-----------------------|------------------|
| 1746408626        | 1986        | 1986        | Hannah and Her Sisters       | Hannah and Her Sisters       | Allen, Woody           | Woody Allen           | tt0091167        |
| 1746578405        | 1959        | 1959        | The Diary of Anne Frank      | The Diary of Anne Frank      | Stevens, George        | George Stevens        | tt0052738        |
| 1746533189        | 1927        | 1927        | Grinning Guns                | Grinning Guns                | Rogell, Albert         | Albert S. Rogell      | tt0017951        |
| 1746585285        | 1928        | 1929        | The Wages of Sin             | Wages of Sin                 | Micheaux, Oscar        | Oscar Micheaux        | tt0139731        |
| 1745272133        | 2001        | 2001        | Corky Romano                 | Corky Romano                 | Pritts, Rob            | Rob Pritts            | tt0250310        |
| 1746394170        | 1986        | 1986        | The Best of Times            | The Best of Times            | Spottiswoode, Roger    | Roger Spottiswoode    | tt0090713        |
| 1746454857        | 1995        | 1995        | Three Wishes                 | Three Wishes                 | Coolidge, Martha       | Martha Coolidge       | tt0114663        |
| 1746583500        | 1930        | 1930        | Courage                      | Courage                      | Mayo, Archie           | Archie Mayo           | tt0020794        |
| 1746464854        | 1941        | 1941        | Come Live with Me            | Come Live with Me            | Brown, Clarence        | Clarence Brown        | tt0033477        |
| 1746515383        | 1920        | 1920        | The Flaming Clue             | The Flaming Clue             | Hollywood, Edwin L.    | Edwin L. Hollywood    | tt0195711        |
| 1746504599        | 1919        | 1919        | The Black Gate               | The Black Gate               | Marston, Theodore      | Theodore Marston      | tt0186883        |
| 1746453815        | 1943        | 1943        | For Whom the Bell Tolls      | For Whom the Bell Tolls      | Wood, Sam              | Sam Wood              | tt0035896        |
| 1746435834        | 1990        | 1990        | White Palace                 | White Palace                 | Mandoki, Luis          | Luis Mandoki          | tt0103251        |
| 1746577766        | 1935        | 1935        | It's a Great Life!           | It's a Great Life            | Cline, Edward F.       | Edward F. Cline       | tt0027812        |
| 1746408860        | 1982        | 1982        | Deathtrap                    | Deathtrap                    | Lumet, Sidney          | Sidney Lumet          | tt0083806        |
| 1746464846        | 1940        | 1940        | Meet the Wildcat             | Meet the Wildcat             | Lubin, Arthur          | Arthur Lubin          | tt0032774        |
| 1746545202        | 1940        | 1940        | The Fight for Life           | The Fight for Life           | Lorentz, Pare          | Pare Lorentz          | tt0032465        |
| 1746576958        | 1961        | 1961        | Judgment at Nuremberg        | Judgment at Nuremberg        | Kramer, Stanley        | Stanley Kramer        | tt0055031        |
| 1746501674        | 1914        | 1914        | In Mizoura                   | In Mizoura                   | McGill, Lawrence B.    | Lawrence B. McGill    | tt0138515        |
| 1746512100        | 1917        | 1917        | The Soul of Satan            | The Soul of Satan            | Turner, Otis           | Otis Turner           | tt0182439        |
| 1746455962        | 1998        | 1997        | Passion in the Desert        | Passion in the Desert        | Currier, Lavinia       | Lavinia Currier       | tt0125980        |
| 1746439202        | 1999        | 1999        | Never Been Kissed            | Never Been Kissed            | Gosnell, Raja          | Raja Gosnell          | tt0151738        |
| 1746566108        | 1956        | 1956        | Forever, Darling             | Forever, Darling             | Hall, Alexander        | Alexander Hall        | tt0049225        |
| <b>1746503738</b> | <b>1918</b> | <b>1918</b> | <b>The Sea Flower</b>        | <b>The Sea Flower</b>        | <b>Campbell, Colin</b> | <b>Colin Campbell</b> | <b>tt0009587</b> |
| 1746564431        | 1952        | 1952        | The Wild North               | The Wild North               | Marton, Andrew         | Andrew Marton         | tt0045329        |
| 1745309329        | 2006        | 2006        | The Black Dahlia             | The Black Dahlia             | De Palma, Brian        | Brian De Palma        | tt0387877        |
| 1746533026        | 1916        | 1916        | The Flower of Faith          | The Flower of Faith          | King, Burton L.        | Burton L. King        | tt0162328        |
| 1746583222        | 1930        | 1929        | Hell's Heroes                | Hell's Heroes                | Wyler, William         | William Wyler         | tt0019976        |
| 1746219589        | 1974        | 1974        | The Texas Chain Saw Massacre | The Texas Chain Saw Massacre | Hooper, Tobe           | Tobe Hooper           | tt0072271        |
| 1746218839        | 1972        | 1972        | The Limit                    | The Limit                    | Kotto, Yaphet          | Yaphet Kotto          | tt0068861        |
| 1746560538        | 1932        | 1932        | The County Fair              | The County Fair              | King, Louis            | Louis King            | tt0022781        |
| 1746570456        | 1934        | 1934        | The Life of Vergie Winters   | The Life of Vergie Winters   | Santell, Alfred        | Alfred Santell        | tt0025393        |
| 1746473927        | 1947        | 1947        | Railroaded!                  | Railroaded!                  | Mann, Anthony          | Anthony Mann          | tt0039748        |
| 1746578807        | 1960        | 1960        | The Sundowners               | The Sundowners               | Zinnemann, Fred        | Fred Zinnemann        | tt0054353        |
| 1746503033        | 1915        | 1915        | Wormwood                     | Wormwood                     | Farnum, Marshall       | Marshall Farnum       | tt0006317        |
| 1746423759        | 1998        | 1998        | The Wedding Singer           | The Wedding Singer           | Coraci, Frank          | Frank Coraci          | tt0120888        |
| 1746520314        | 1925        | 1925        | Ranchers and Rascals         | Ranchers and Rascals         |                        | Leo D. Maloney        | tt0016260        |
| 1745395125        | 2008        | 2007        | Remember the Daze            | Remember the Daze            | Manafort, Jess         | Jess Manafort         | tt0790618        |
| 1746570158        | 1934        | 1934        | The Crime of Helen Stanley   | The Crime of Helen Stanley   | Lederman, D. Ross      | D. Ross Lederman      | tt0025010        |
| 1746523364        | 1927        | 1927        | The Fightin' Comeback        | The Fightin' Comeback        | Wright, Tenny          | Tenny Wright          | tt0017876        |
| 1746573975        | 1959        | 1959        | Teenagers from Outer Space   | Teenagers from Outer Space   | Graeff, Tom            | Tom Graeff            | tt0053337        |
| 1746436578        | 1940        | 1940        | Congo Maisie                 | Congo Maisie                 | Potter, Henry C.       | H.C. Potter           | tt0032353        |
| 1746582525        | 1935        | 1935        | Wolf Riders                  | Wolf Riders                  | Webb, Harry S.         | Harry S. Webb         | tt0141994        |
| 1746520301        | 1949        | 1949        | Shockproof                   | Shockproof                   | Sirk, Douglas          | Douglas Sirk          | tt0041871        |
| 1746520232        | 1925        | 1925        | Speed Madness                | Speed Madness                | Mitchell, Bruce        | Bruce Mitchell        | tt0016382        |
| 1746501153        | 1916        | 1916        | The Purple Lady              | The Purple Lady              | Lessey, George A.      | George Lessey         | tt0007230        |
| 1746475677        | 1947        | 1947        | Born to Kill                 | Born to Kill                 | Wise, Robert           | Robert Wise           | tt0039211        |
| 1746577812        | 1935        | 1935        | Cardinal Richelieu           | Cardinal Richelieu           | Lee, Rowland V.        | Rowland V. Lee        | tt0026180        |
| 1746585036        | 1940        | 1940        | Melody Ranch                 | Melody Ranch                 | Santley, Joseph        | Joseph Santley        | tt0032779        |
| 1746409992        | 1992        | 1992        | Wayne's World                | Wayne's World                | Spheeris, Penelope     | Penelope Spheeris     | tt0105793        |
| 1746491801        | 1948        | 1948        | The Secret Land              | The Secret Land              |                        |                       | tt0040767        |
| 1746520925        | 1949        | 1948        | The Kissing Bandit           | The Kissing Bandit           | Benedek, Laslo         | Laslo Benedek         | tt0040513        |
| 1745341467        | 2003        | 2002        | The Year That Trembled       | The Year That Trembled       | Craven, Jay            | Jay Craven            | tt0288324        |
| 1746211249        | 1973        | 1973        | A Warm December              | A Warm December              | Poitier, Sidney        | Sidney Poitier        | tt0070898        |
| 1746514336        | 1916        | 1916        | Thou Shalt Not Covet         | Thou Shalt Not Covet         | Campbell, Colin        | Colin Campbell        | tt0007451        |
| 1746577022        | 1951        | 1951        | G. I. Jane                   | G.I. Jane                    | Le Borg, Reginald      | Reginald Le Borg      | tt0043572        |
| 1746580518        | 1935        | 1935        | Nevada                       | Nevada                       | Barton, Charles        | Charles Barton        | tt0028026        |

|            |      |      |                                                 |                                                 |                                      |                     |           |
|------------|------|------|-------------------------------------------------|-------------------------------------------------|--------------------------------------|---------------------|-----------|
| 1746577252 | 1950 | 1950 | Tarnished                                       | Tarnished                                       | Keller, Harry                        | Harry Keller        | tt0043024 |
| 1746533011 | 1915 | 1915 | The Deathlock                                   | The Deathlock                                   |                                      | Fred J. Butler      | tt0005184 |
| 1746434334 | 1989 | 1989 | Dream a Little Dream                            | Dream a Little Dream                            | Rocco, Marc                          | Marc Rocco          | tt0097236 |
| 1746583332 | 1930 | 1930 | Mammy                                           | Mammy                                           | Curtiz, Michael                      | Michael Curtiz      | tt0021110 |
| 1746532763 | 1914 | 1914 | Salomy Jane                                     | Salomy Jane                                     | Henderson, Lucius; Nigh, William     | Lucius Henderson    | tt0004555 |
| 1746501470 | 1916 | 1916 | Oliver Twist                                    | Oliver Twist                                    | Young, James                         | James Young         | tt0007142 |
| 1746218872 | 1974 | 1974 | The Lords of Flatbush                           | The Lords of Flatbush                           | Verona, Stephen F.; Davidson, Martin | Martin Davidson     | tt0071772 |
| 1746582651 | 1935 | 1935 | The Bishop Misbehaves                           | The Bishop Misbehaves                           | Dupont, E. A.                        | Ewald André Dupont  | tt0026120 |
| 1745342829 | 2008 | 2008 | The Ruins                                       | The Ruins                                       | Smith, Carter                        | Carter Smith        | tt0963794 |
| 1746394030 | 1989 | 1989 | Enemies, A Love Story                           | Enemies: A Love Story                           | Mazursky, Paul                       | Paul Mazursky       | tt0097276 |
| 1746392656 | 1982 | 1982 | Alone in the Dark                               | Alone in the Dark                               | Sholder, Jack                        | Jack Sholder        | tt0083542 |
| 1746577807 | 1936 | 1936 | Outlaws of the Range                            | Outlaws of the Range                            | Herman, Al                           | Albert Herman       | tt0028072 |
| 1746492490 | 1947 | 1946 | Cross My Heart                                  | Cross My Heart                                  | Berry, John                          | John Berry          | tt0038438 |
| 1746420508 | 1982 | 1982 | I, the Jury                                     | I, the Jury                                     | Heffron, Richard T.                  | Richard T. Heffron  | tt0084112 |
| 1746578631 | 1962 | 1962 | Confessions of an Opium Eater                   | Confessions of an Opium Eater                   | Zugsmith, Albert                     | Albert Zugsmith     | tt0055864 |
| 1746574436 | 1962 | 1962 | Freud                                           | Freud                                           | Huston, John                         | John Huston         | tt0055998 |
| 1746567614 | 1933 | 1933 | Girl Without a Room                             | Girl Without a Room                             | Murphy, Ralph                        | Ralph Murphy        | tt0024063 |
| 1746584723 | 1928 | 1928 | The Grain of Dust                               | The Grain of Dust                               | Archainbaud, George                  | George Archainbaud  | tt0018953 |
| 1746573763 | 1958 | 1958 | A Nice Little Bank That Should Be Robbed        | A Nice Little Bank That Should Be Robbed        | Levin, Henry                         | Henry Levin         | tt0051990 |
| 1745342910 | 2003 | 2003 | The Rundown                                     | The Rundown                                     | Berg, Peter                          | Peter Berg          | tt0327850 |
| 1746582536 | 1935 | 1935 | G-Men                                           | 'G' Men                                         | Keighley, William                    | William Keighley    | tt0026393 |
| 1746410544 | 1985 | 1984 | The Dungeonmaster                               | The Dungeonmaster                               |                                      | David Allen         | tt0089060 |
| 1746584430 | 1939 | 1939 | The Ice Follies of 1939                         | The Ice Follies of 1939                         | Schunzel, Reinhold                   | Reinhold Schünzel   | tt0031470 |
| 1746439089 | 1996 | 1995 | From the Journals of Jean Seberg                | From the Journals of Jean Seberg                | Rappaport, Mark                      | Mark Rappaport      | tt0113125 |
| 1746514284 | 1923 | 1923 | Where Is This West?                             | Where Is This West?                             | Marshall, George E.                  | George Marshall     | tt0014599 |
| 1746423971 | 1943 | 1943 | At the Front in North Africa with the U.S. Army | At the Front in North Africa with the U.S. Army |                                      | John Ford           | tt2491546 |
| 1746501665 | 1916 | 1916 | Husband and Wife                                | Husband and Wife                                | O'Neil, Barry                        | Barry O'Neil        | tt0006838 |
| 1745340767 | 2002 | 2002 | Tuck Everlasting                                | Tuck Everlasting                                | Russell, Jay                         | Jay Russell         | tt0283084 |
| 1746565910 | 1953 | 1953 | One Girl's Confession                           | One Girl's Confession                           | Haas, Hugo                           | Hugo Haas           | tt0046143 |
| 1746408509 | 1988 | 1988 | Vibes                                           | Vibes                                           | Kwapis, Ken                          | Ken Kwapis          | tt0096378 |
| 1746453828 | 1941 | 1941 | Ziegfeld Girl                                   | Ziegfeld Girl                                   | Leonard, Robert Z.                   | Robert Z. Leonard   | tt0034415 |
| 1746583430 | 1931 | 1930 | Playthings of Hollywood                         | Playthings of Hollywood                         | O'Connor, William                    | William A. O'Connor | tt0022269 |
| 1746483868 | 1918 | 1918 | A Japanese Nightingale                          | A Japanese Nightingale                          | Fitzmaurice, George                  | George Fitzmaurice  | tt0009237 |
| 1745309645 | 2006 | 2006 | The Gravedancers                                | The Gravedancers                                | Mendez, Mike                         | Mike Mendez         | tt0435653 |
| 1746497555 | 1917 | 1917 | The Web of Life                                 | The Web of Life                                 | Rolands, George K.                   | George K. Rolands   | tt0184002 |
| 1746569641 | 1958 | 1958 | Live Fast, Die Young                            | Live Fast, Die Young                            | Henreid, Paul                        | Paul Henreid        | tt0051871 |
| 1746574112 | 1958 | 1958 | Space Master X-7                                | Space Master X 7                                | Bernds, Edward                       | Edward Bernds       | tt0052228 |
| 1746486304 | 1920 | 1920 | Water, Water Everywhere                         | Water, Water, Everywhere                        | Badger, Clarence G.                  | Clarence G. Badger  | tt0011840 |
| 1746409078 | 1982 | 1982 | Zapped!                                         | Zapped!                                         | Rosenthal, Robert J.                 | Robert J. Rosenthal | tt0084945 |
| 1746562474 | 1953 | 1953 | Fear and Desire                                 | Fear and Desire                                 | Kubrick, Stanley                     | Stanley Kubrick     | tt0045758 |
| 1746580392 | 1939 | 1939 | Society Lawyer                                  | Society Lawyer                                  | Marin, Edwin L.                      | Edwin L. Marin      | tt0031946 |
| 1746514243 | 1916 | 1916 | The Prince Chap                                 | The Prince Chap                                 | Neilan, Marshall                     | Marshall Neilan     | tt0007218 |
| 1746492380 | 1945 | 1945 | Gangs of the Waterfront                         | Gangs of the Waterfront                         | Blair, George                        | George Blair        | tt0037727 |
| 1745373077 | 2010 | 2010 | Howl                                            | The Owls                                        | Epstein, Rob; Friedman, Jeffrey      | Cheryl Dunye        | tt1507369 |
| 1746423308 | 1997 | 1997 | Slaves to the Underground                       | Slaves to the Underground                       | Peterson, Kristine                   | Kristine Peterson   | tt0117664 |
| 1746409950 | 1989 | 1989 | The Wizard                                      | The Wizard                                      | Holland, Todd                        | Todd Holland        | tt0098663 |
| 1746583163 | 1935 | 1935 | On Probation                                    | On Probation                                    | Hutchison, Charles                   | Charles Hutchison   | tt0026817 |
| 1746408472 | 1986 | 1986 | Nomads                                          | Nomads                                          | McTiernan, John                      | John McTiernan      | tt0091647 |
| 1746580472 | 1937 | 1937 | The Fighting Texan                              | The Fighting Texan                              | Abbott, Charles                      | Charles Abbott      | tt0132951 |
| 1769969520 | 1911 | 1911 | The Fallin' Out                                 | The Fallin' Out                                 |                                      |                     | tt0359252 |
| 1746577921 | 1937 | 1937 | What Price Vengeance                            | What Price Vengeance                            | Lord, Del                            | Del Lord            | tt0029728 |
| 1746409502 | 1985 | 1985 | Into the Night                                  | Into the Night                                  | Landis, John                         | John Landis         | tt0089346 |
| 1746581462 | 1962 | 1962 | Strangers in the City                           | Strangers in the City                           | Carrier, Rick                        | Rick Carrier        | tt0056529 |
| 1746573815 | 1957 | 1957 | Panama Sal                                      | Panama Sal                                      | Witney, William                      | William Witney      | tt0050816 |
| 1746523812 | 1923 | 1923 | The Shock                                       | The Shock                                       | Hillyer, Lambert                     | Lambert Hillyer     | tt0014463 |
| 1746485898 | 1920 | 1920 | Terror Island                                   | Terror Island                                   | Cruze, James                         | James Cruze         | tt0011753 |
| 1746580360 | 1935 | 1935 | Death Flies East                                | Death Flies East                                | Rosen, Phil                          | Phil Rosen          | tt0026268 |

|            |      |      |                                        |                                       |                                  |                      |           |
|------------|------|------|----------------------------------------|---------------------------------------|----------------------------------|----------------------|-----------|
| 1746562180 | 1957 | 1957 | Not of This Earth                      | Not of This Earth                     | Corman, Roger                    | Roger Corman         | tt0050778 |
| 1746571752 | 1932 | 1932 | Tiger Shark                            | Tiger Shark                           | Hawks, Howard                    | Howard Hawks         | tt0023594 |
| 1746581107 | 1960 | 1960 | Last Woman on Earth                    | Last Woman on Earth                   | Corman, Roger                    | Roger Corman         | tt0054017 |
| 1746574703 | 1933 | 1933 | The Right to Romance                   | The Right to Romance                  | Santell, Alfred                  | Alfred Santell       | tt0024501 |
| 1746512622 | 1910 | 1910 | The Winning of Miss Langdon            | The Winning of Miss Langdon           |                                  | Edwin S. Porter      | tt1064824 |
| 1746219342 | 1978 | 1978 | Moment by Moment                       | Moment by Moment                      | Wagner, Jane                     | Jane Wagner          | tt0077942 |
| 1746197930 | 1969 | 1969 | The Lost Man                           | The Lost Man                          | Aurthur, Robert Alan             | Robert Alan Aurthur  | tt0064602 |
| 1746550313 | 1957 | 1957 | Love Slaves of the Amazons             | Love Slaves of the Amazons            | Siodmak, Curt                    | Curt Siodmak         | tt0050656 |
| 1746580423 | 1938 | 1938 | God's Step Children                    | God's Step Children                   | Micheaux, Oscar                  | Oscar Micheaux       | tt0028942 |
| 1746504909 | 1921 | 1921 | Don't Neglect Your Wife                | Don't Neglect Your Wife               | Worsley, Wallace                 | Wallace Worsley      | tt0012116 |
| 1746436360 | 1940 | 1940 | Father Is a Prince                     | Father Is a Prince                    | Smith, Noel                      | Noel M. Smith        | tt0032458 |
| 1746580277 | 1938 | 1938 | Rollin' Plains                         | Rollin' Plains                        | Herman, Al                       | Albert Herman        | tt0030689 |
| 1746408910 | 1992 | 1992 | Sneakers                               | Sneakers                              | Robinson, Phil Alden             | Phil Alden Robinson  | tt0105435 |
| 1746580885 | 1934 | 1934 | Embarrassing Moments                   | Embarrassing Moments                  | Laemmle, Edward                  | Edward Laemmle       | tt0025081 |
| 1746424442 | 1941 | 1941 | Borrowed Hero                          | Borrowed Hero                         | Collins, Lewis D.                | Lewis D. Collins     | tt0033426 |
| 1746513638 | 1915 | 1915 | Graustark                              | Graustark                             | Wright, Fred E.                  | Fred E. Wright       | tt0005411 |
| 1746567993 | 1934 | 1934 | Frontier Days                          | Frontier Days                         | Hill, Robert                     | Robert F. Hill       | tt0025143 |
| 1746584185 | 1938 | 1938 | If I Were King                         | If I Were King                        | Lloyd, Frank                     | Frank Lloyd          | tt0030265 |
| 1746484432 | 1919 | 1919 | Someone Must Pay                       | Someone Must Pay                      | Abramson, Ivan                   | Ivan Abramson        | tt0168180 |
| 1746534781 | 1921 | 1921 | The Double O                           | The Double O                          | Clements, Roy                    | Roy Clements         | tt0012119 |
| 1746569846 | 1955 | 1955 | Kismet                                 | Kismet                                | Minnelli, Vincente               | Vincente Minnelli    | tt0048260 |
| 1746514698 | 1927 | 1927 | The Interferin' Gent                   | The Interferin' Gent                  | Thorpe, Richard                  | Richard Thorpe       | tt0124760 |
| 1746454384 | 1943 | 1943 | Death Valley Rangers                   | Death Valley Rangers                  | Tansey, Robert                   | Robert Emmett Tansey | tt0035788 |
| 1746581927 | 1928 | 1928 | Under the Black Eagle                  | Under the Black Eagle                 | Van Dyke, W. S.                  | W.S. Van Dyke        | tt0019507 |
| 1746504170 | 1918 | 1918 | The Green God                          | The Green God                         | Scardon, Paul                    | Paul Scardon         | tt0010194 |
| 1746525134 | 1921 | 1921 | The Woman God Changed                  | The Woman God Changed                 | Vignola, Robert G.               | Robert G. Vignola    | tt0012860 |
| 1746491841 | 1947 | 1947 | The Devil on Wheels                    | The Devil on Wheels                   | Wilbur, Crane                    | Crane Wilbur         | tt0039318 |
| 1746583197 | 1930 | 1930 | The Kibitzer                           | The Kibitzer                          | Sloman, Edward                   | Edward Sloman        | tt0020056 |
| 1745309208 | 2006 | 2006 | Al Franken: God Spoke                  | Al Franken: God Spoke                 | Doob, Nick; Hegedus, Chris       | Nick Doob            | tt0799916 |
| 1746585319 | 1930 | 1930 | Romance                                | Romance                               | Brown, Clarence                  | Clarence Brown       | tt0021310 |
| 1746520982 | 1948 | 1948 | Urubu                                  | Urubu                                 | Breakston, George; Coplen, Yorke | George P. Breakston  | tt0040927 |
| 1746219065 | 1980 | 1980 | Hopscotch                              | Hopscotch                             | Neame, Ronald                    | Ronald Neame         | tt0080889 |
| 1746580883 | 1939 | 1939 | Stanley and Livingstone                | Stanley and Livingstone               | King, Henry                      | Henry King           | tt0031973 |
| 1746419187 | 1993 | 1993 | The Man Without a Face                 | The Man Without a Face                | Gibson, Mel                      | Mel Gibson           | tt0107501 |
| 1745302899 | 2005 | 2005 | Pretty Persuasion                      | Pretty Persuasion                     | Siega, Marcos                    | Marcos Siega         | tt0381505 |
| 1746261218 | 1979 | 1979 | Manhattan                              | Manhattan                             | Allen, Woody                     | Woody Allen          | tt0079522 |
| 1746562157 | 1953 | 1953 | Law and Order                          | Law and Order                         | Juran, Nathan                    | Nathan Juran         | tt0045991 |
| 1746394729 | 1989 | 1989 | She's Out of Control                   | She's Out of Control                  | Dragoti, Stan                    | Stan Dragoti         | tt0098308 |
| 1746570310 | 1934 | 1934 | Gambling Lady                          | Gambling Lady                         | Mayo, Archie                     | Archie Mayo          | tt0025161 |
| 1746584166 | 1939 | 1939 | Captain Fury                           | Captain Fury                          | Roach, Hal                       | Hal Roach            | tt0031137 |
| 1746524657 | 1927 | 1927 | We're All Gamblers                     | We're All Gamblers                    | Cruze, James                     | James Cruze          | tt0018550 |
| 1746524890 | 1915 | 1915 | The Great Divide                       | The Great Divide                      | Lewis, Edgar                     | Edgar Lewis          | tt0005416 |
| 1746504207 | 1921 | 1921 | The Kiss                               | The Kiss                              | Conway, Jack                     | Jack Conway          | tt0012356 |
| 1746520454 | 1926 | 1926 | The Whole Town's Talking               | The Whole Town's Talking              | Laemmle, Edward                  | Edward Laemmle       | tt0017554 |
| 1746503945 | 1919 | 1919 | The Life Line                          | The Life Line                         | Tourneur, Maurice                | Maurice Tourneur     | tt0010352 |
| 1746532463 | 1916 | 1916 | The Target                             | The Target                            | MacGregor, Norval                | Norval MacGregor     | tt0007430 |
| 1746580682 | 1939 | 1939 | Blondie Brings Up Baby                 | Blondie Brings Up Baby                | Strayer, Frank R.                | Frank R. Strayer     | tt0031106 |
| 1746504403 | 1920 | 1920 | A Child for Sale                       | A Child for Sale                      | Abramson, Ivan                   | Ivan Abramson        | tt0167826 |
| 1746436550 | 1943 | 1943 | The Man from Music Mountain            | Man from Music Mountain               | Kane, Joseph                     | Joseph Kane          | tt0036132 |
| 1746523591 | 1916 | 1916 | The Light That Failed                  | The Light That Failed                 | José, Edward                     | Edward José          | tt0005620 |
| 1746520762 | 1925 | 1925 | The Cactus Cure                        | The Cactus Cure                       | Hayes, Ward                      | Ward Hayes           | tt0015660 |
| 1746524066 | 1910 | 1910 | Mazeppa; or, The Wild Horse of Tartary | Mazeppa, or the Wild Horse of Tartary |                                  | Francis Boggs        | tt0001311 |
| 1745309287 | 2007 | 2007 | There Will Be Blood                    | There Will Be Blood                   | Anderson, Paul Thomas            | Paul Thomas Anderson | tt0469494 |
| 1746475272 | 1947 | 1947 | The Corpse Came C.O.D.                 | The Corpse Came C.O.D.                | Levin, Henry                     | Henry Levin          | tt0039279 |
| 1746585144 | 1928 | 1928 | Devil Dogs                             | Devil Dogs                            | Windermere, Fred                 | Fred Windemere       | tt0018827 |
| 1746580861 | 1935 | 1935 | Ruggles of Red Gap                     | Ruggles of Red Gap                    | McCarey, Leo                     | Leo McCarey          | tt0026955 |
| 1746582840 | 1936 | 1936 | The Blackmailer                        | Blackmailer                           | Wiles, Gordon                    | Gordon Wiles         | tt0027368 |

|            |      |      |                                  |                                  |                     |                    |           |
|------------|------|------|----------------------------------|----------------------------------|---------------------|--------------------|-----------|
| 1746185892 | 1969 | 1969 | The Scavengers                   | The Scavengers                   | Frost, R. L.        | Lee Frost          | tt0067714 |
| 1746434011 | 2000 | 2000 | Gossip                           | Gossip                           | Guggenheim, Davis   | Davis Guggenheim   | tt0176783 |
| 1746575007 | 1936 | 1936 | Arizona Mahoney                  | Arizona Mahoney                  | Hogan, James        | James P. Hogan     | tt0028584 |
| 1746465136 | 1946 | 1946 | Our Hearts Were Growing Up       | Our Hearts Were Growing Up       | Russell, William D. | William D. Russell | tt0038815 |
| 1746503354 | 1919 | 1919 | The Speed Maniac                 | The Speed Maniac                 | LeSainte, Edward J. | Edward LeSaint     | tt0010725 |
| 1746218417 | 1966 | 1965 | The Naked Prey                   | The Naked Prey                   | Wilde, Cornel       | Cornel Wilde       | tt0060736 |
| 1746568360 | 1933 | 1933 | Man of the Forest                | Man of the Forest                | Hathaway, Henry     | Henry Hathaway     | tt0024301 |
| 1746564806 | 1953 | 1953 | Cruisin' Down the River          | Cruisin' Down the River          | Quine, Richard      | Richard Quine      | tt0045660 |
| 1746420249 | 1987 | 1987 | Hiding Out                       | Hiding Out                       | Giraldi, Bob        | Bob Giraldi        | tt0093186 |
| 1769970498 | 1965 | 1965 | Raw Love                         | Raw Love                         | Osborne, Kent       | Ken Osborne        | tt0194296 |
| 1746578952 | 1959 | 1959 | This Earth Is Mine               | This Earth Is Mine               | King, Henry         | Henry King         | tt0053355 |
| 1746420528 | 1993 | 1993 | Grumpy Old Men                   | Grumpy Old Men                   | Petrie, Donald      | Donald Petrie      | tt0107050 |
| 1746566207 | 1956 | 1956 | Rock Rock Rock!                  | Rock Rock Rock!                  | Price, Will         | Will Price         | tt0049684 |
| 1745359697 | 2002 | 2003 | Astoria                          | Æstoria                          | Efteriades, Nick    | Leo Fialho         | tt0410948 |
| 1746566222 | 1953 | 1953 | Yesterday and Today              | Yesterday and Today              | Greshler, Abner J.  | Abner J. Greshler  | tt0358778 |
| 1746500769 | 1913 | 1913 | Chelsea 7750                     | Chelsea 7750                     | Dawley, J. Searle   | J. Searle Dawley   | tt0002748 |
| 1746474982 | 1948 | 1948 | The Bride Goes Wild              | The Bride Goes Wild              | Taurog, Norman      | Norman Taurog      | tt0040187 |
| 1746454101 | 1943 | 1943 | The Battle of Britain            | The Battle of Britain            |                     | Frank Capra        | tt0182766 |
| 1746582974 | 1938 | 1938 | The Gladiator                    | The Gladiator                    | Sedgwick, Edward    | Edward Sedgwick    | tt0030186 |
| 1746435611 | 1941 | 1941 | Mob Town                         | Mob Town                         | Nigh, William       | William Nigh       | tt0033914 |
| 1746578709 | 1962 | 1962 | Five Finger Exercise             | Five Finger Exercise             | Mann, Daniel        | Daniel Mann        | tt0055987 |
| 1746569940 | 1959 | 1959 | North by Northwest               | North by Northwest               | Hitchcock, Alfred   | Alfred Hitchcock   | tt0053125 |
| 1746454634 | 1945 | 1945 | Phantom of the Plains            | Phantom of the Plains            | Selander, Lesley    | Lesley Selander    | tt0037986 |
| 1746509287 | 1924 | 1924 | Black Lightning                  | Black Lightning                  | Hogan, James P.     | James P. Hogan     | tt0014720 |
| 1746453787 | 1944 | 1944 | Sweet and Low-Down               | Sweet and Low Down               | Mayo, Archie        | Archie Mayo        | tt0037333 |
| 1746393236 | 1984 | 1984 | Lassiter                         | Lassiter                         | Young, Roger        | Roger Young        | tt0087589 |
| 1746503796 | 1918 | 1918 | That Devil, Bateese              | That Devil, Bateese              | Wolbert, William    | William Wolbert    | tt0009688 |
| 1746392749 | 1984 | 1984 | Splash                           | Splash                           | Howard, Ron         | Ron Howard         | tt0088161 |
| 1746502007 | 1916 | 1916 | Dollars and the Woman            | Dollars and the Woman            | Kaufman, Joseph     | Joseph Kaufman     | tt0157549 |
| 1746508900 | 1927 | 1927 | Naughty                          | Naughty                          | Del Ruth, Hampton   | Hampton Del Ruth   | tt0018193 |
| 1746571251 | 1935 | 1935 | A Shot in the Dark               | A Shot in the Dark               | Lamont, Charles     | Charles Lamont     | tt0026991 |
| 1746491813 | 1946 | 1946 | The People's Choice              | The People's Choice              | Fraser, Harry       | Harry L. Fraser    | tt0295512 |
| 1746439698 | 1999 | 1999 | Instinct                         | Instinct                         | Turteltaub, Jon     | Jon Turteltaub     | tt0128278 |
| 1746520679 | 1925 | 1925 | Shore Leave                      | Shore Leave                      | Robertson, John S.  | John S. Robertson  | tt0016346 |
| 1746503993 | 1918 | 1918 | Painted Lips                     | Painted Lips                     | Le Saint, Edward J. | Edward LeSaint     | tt0009473 |
| 1746424555 | 1940 | 1940 | An Angel from Texas              | An Angel from Texas              | Enright, Ray        | Ray Enright        | tt0032207 |
| 1745341437 | 2002 | 2002 | Like Mike                        | Like Mike                        | Schultz, John       | John Schultz       | tt0308506 |
| 1746582681 | 1935 | 1935 | The Casino Murder Case           | The Casino Murder Case           | Marin, Edwin L.     | Edwin L. Marin     | tt0026187 |
| 1746570294 | 1933 | 1933 | Lilly Turner                     | Lilly Turner                     | Wellman, William A. | William A. Wellman | tt0024258 |
| 1746574984 | 1936 | 1936 | Murder at Glen Athol             | Murder at Glen Athol             | Strayer, Frank R.   | Frank R. Strayer   | tt0028000 |
| 1746497906 | 1918 | 1918 | The House of Glass               | The House of Glass               | Chautard, Emile     | Emile Chautard     | tt0009202 |
| 1746523463 | 1915 | 1915 | The Fighting Hope                | The Fighting Hope                | Melford, George     | George Melford     | tt0005323 |
| 1746569683 | 1957 | 1957 | Four Boys and a Gun              | Four Boys and a Gun              | Berke, William      | William Berke      | tt0127562 |
| 1746504746 | 1922 | 1922 | Beware of the Law                | Beware of the Law                | Douglas, W. A. S.   | W.A.S. Douglas     | tt0012935 |
| 1746218824 | 1980 | 1980 | The Man with Bogart's Face       | The Man with Bogart's Face       | Day, Robert         | Robert Day         | tt0081110 |
| 1746394516 | 1986 | 1985 | Zone Troopers                    | Zone Troopers                    | Bilson, Danny       | Danny Bilson       | tt0092298 |
| 1746524437 | 1915 | 1915 | The Deep Purple                  | The Deep Purple                  | Young, James        | James Young        | tt0005185 |
| 1746410202 | 1984 | 1984 | Mike's Murder                    | Mike's Murder                    | Bridges, James      | James Bridges      | tt0087722 |
| 1746565981 | 1953 | 1953 | Houdini                          | Houdini                          | Marshall, George    | George Marshall    | tt0045886 |
| 1746438320 | 1942 | 1941 | Paris Calling                    | Paris Calling                    | Marin, Edwin L.     | Edwin L. Marin     | tt0034002 |
| 1746581676 | 1950 | 1950 | Radar Secret Service             | Radar Secret Service             | Newfield, Sam       | Sam Newfield       | tt0042874 |
| 1746465047 | 1942 | 1942 | Dr. Gillespie's New Assistant    | Dr. Gillespie's New Assistant    | Goldbeck, Willis    | Willis Goldbeck    | tt0034680 |
| 1746573995 | 1962 | 1962 | The Man Who Shot Liberty Valance | The Man Who Shot Liberty Valance | Ford, John          | John Ford          | tt0056217 |
| 1746393479 | 1983 | 1983 | 10 to Midnight                   | 10 to Midnight                   | Thompson, J. Lee    | J. Lee Thompson    | tt0085121 |
| 1746500660 | 1925 | 1925 | The Home Maker                   | The Home Maker                   | Baggot, King        | King Baggot        | tt0015924 |
| 1745358683 | 2010 | 2010 | Extraordinary Measures           | Extraordinary Measures           | Vaughan, Tom        | Tom Vaughan        | tt1244659 |
| 1746454390 | 1941 | 1941 | Man at Large                     | Man at Large                     | Forde, Eugene       | Eugene Forde       | tt0033876 |

|            |      |      |                                                |                                                |                     |                        |           |
|------------|------|------|------------------------------------------------|------------------------------------------------|---------------------|------------------------|-----------|
| 1746564490 | 1951 | 1951 | The Raging Tide                                | The Raging Tide                                | Sherman, George     | George Sherman         | tt0043957 |
| 1746513147 | 1915 | 1915 | On the Night Stage                             | On the Night Stage                             | Barker, Reginald    | Reginald Barker        | tt0005832 |
| 1746583531 | 1931 | 1931 | First Aid                                      | First Aid                                      | Paton, Stuart       | Stuart Paton           | tt0021869 |
| 1745342028 | 2010 | 2010 | MacGruber                                      | MacGruber                                      | Taccone, Jorma      | Jorma Taccone          | tt1470023 |
| 1746575797 | 1932 | 1932 | Men of America                                 | Men of America                                 | Ince, Ralph         | Ralph Ince             | tt0023208 |
| 1746582186 | 1929 | 1929 | Speakeasy                                      | Speakeasy                                      | Stoloff, Benjamin   | Benjamin Stoloff       | tt0020438 |
| 1746248143 | 1966 | 1966 | The Undertaker and His Pals                    | The Undertaker and His Pals                    | Swicegood, T. L. P. | T.L.P. Swicegood       | tt0061140 |
| 1746582358 | 1929 | 1929 | Pleasure Crazyed                               | Pleasure Crazyed                               | Gallaher, Donald    | Donald Gallaher        | tt0020275 |
| 1746251197 | 1975 | 1975 | A Boy and His Dog                              | A Boy and His Dog                              | Jones, L. Q.        | L.Q. Jones             | tt0072730 |
| 1746465056 | 1942 | 1942 | Footlight Serenade                             | Footlight Serenade                             | Ratoff, Gregory     | Gregory Ratoff         | tt0034745 |
| 1746524766 | 1914 | 1914 | The Line-Up at Police Headquarters             | The Line Up at Police Headquarters             | Beal, Frank         | Frank Beal             | tt0004230 |
| 1746574405 | 1961 | 1961 | Two Loves                                      | Two Loves                                      | Walters, Charles    | Charles Walters        | tt0055557 |
| 1745359567 | 2001 | 2001 | The Royal Tenenbaums                           | The Royal Tenenbaums                           | Anderson, Wes       | Wes Anderson           | tt0265666 |
| 1746270017 | 1979 | 1979 | Rocky II                                       | Rocky II                                       | Stallone, Sylvester | Sylvester Stallone     | tt0079817 |
| 1746582367 | 1929 | 1929 | Fancy Baggage                                  | Fancy Baggage                                  | Adolfi, John G.     | John G. Adolfi         | tt0019867 |
| 1746514816 | 1923 | 1923 | Are You a Failure?                             | Are You a Failure?                             | Forman, Tom         | Tom Forman             | tt0013838 |
| 1746232953 | 1968 | 1968 | Rosemary's Baby                                | Rosemary's Baby                                | Polanski, Roman     | Roman Polanski         | tt0063522 |
| 1746577953 | 1938 | 1938 | Accidents Will Happen                          | Accidents Will Happen                          | Clemens, William    | William Clemens        | tt0029836 |
| 1746550169 | 1955 | 1955 | The Seven Year Itch                            | The Seven Year Itch                            | Wildier, Billy      | Billy Wildier          | tt0048605 |
| 1746513472 | 1916 | 1916 | The Victory of Conscience                      | The Victory of Conscience                      | Reicher, Frank      | Frank Reicher          | tt0007517 |
| 1746584244 | 1935 | 1935 | Swell-Head                                     | Swellhead                                      | Stoloff, Ben        | Benjamin Stoloff       | tt0027066 |
| 1746410741 | 1982 | 1982 | First Blood                                    | First Blood                                    | Kotcheff, Ted       | Ted Kotcheff           | tt0083944 |
| 1746570035 | 1934 | 1934 | Manhattan Love Song                            | Manhattan Love Song                            | Fields, Leonard     | Leonard Fields         | tt0025463 |
| 1746561696 | 1932 | 1932 | Tangled Fortunes                               | Tangled Fortunes                               | McGowan, J. P.      | J.P. McGowan           | tt0023550 |
| 1769970093 | 1912 | 1912 | God's Unfortunate                              | God's Unfortunates                             |                     | Allan Dwan             | tt1326980 |
| 1746580742 | 1937 | 1937 | Ever Since Eve                                 | Ever Since Eve                                 | Bacon, Lloyd        | Lloyd Bacon            | tt0028842 |
| 1746542647 | 1924 | 1924 | Dynamite Dan                                   | Dynamite Dan                                   | Mitchell, Bruce     | Bruce Mitchell         | tt0014857 |
| 1746504395 | 1920 | 1920 | The Furnace                                    | The Furnace                                    | Taylor, William D.  | William Desmond Taylor | tt0011215 |
| 1746584639 | 1930 | 1930 | What Men Want                                  | What Men Want                                  | Laemmle, Ernst      | Ernst Laemmle          | tt0021543 |
| 1746422034 | 1992 | 1992 | Zebrahead                                      | Zebrahead                                      | Drazen, Anthony     | Anthony Drazen         | tt0105885 |
| 1746475976 | 1948 | 1948 | Music Man                                      | Music Man                                      | Jason, Will         | Will Jason             | tt0040621 |
| 1746217850 | 1966 | 1966 | Rings Around the World                         | Rings Around the World                         | Cates, Gilbert      | Gilbert Cates          | tt0060902 |
| 1746581256 | 1910 | 1910 | Gold Is Not All                                | Gold Is Not All                                | Griffith, D. W.     | D.W. Griffith          | tt0001234 |
| 1746570427 | 1933 | 1933 | Tarzan the Fearless                            | Tarzan the Fearless                            | Hill, Robert F.     | Robert F. Hill         | tt0024645 |
| 1746454036 | 1941 | 1941 | The Monster and the Girl                       | The Monster and the Girl                       | Heisler, Stuart     | Stuart Heisler         | tt0033916 |
| 1746578655 | 1959 | 1959 | The Crimson Kimono                             | The Crimson Kimono                             | Fuller, Samuel      | Samuel Fuller          | tt0052713 |
| 1746422237 | 1998 | 1998 | The Players Club                               | The Players Club                               | Cube, Ice           | Ice Cube               | tt0119905 |
| 1746555196 | 1956 | 1955 | The Beast with a Million Eyes                  | The Beast with a Million Eyes                  | Kramarsky, David    | David Kramarsky        | tt0048991 |
| 1745293563 | 2004 | 2004 | Final Cut: The Making and Unmaking of Heaven's | Final Cut: The Making and Unmaking of Heaven's | Epstein, Michael    | Michael Epstein        | tt0424089 |
| 1746475927 | 1945 | 1945 | That Night with You                            | That Night with You                            | Seiter, William A.  | William A. Seiter      | tt0038156 |
| 1746566098 | 1956 | 1956 | The Bold and the Brave                         | The Bold and the Brave                         | Foster, Lewis R.    | Lewis R. Foster        | tt0049022 |
| 1746508511 | 1925 | 1925 | A Kiss in the Dark                             | A Kiss in the Dark                             | Tuttle, Frank       | Frank Tuttle           | tt0015980 |
| 1769971151 | 1969 | 1969 | The Layout                                     | The Layout                                     | Sarno, Joe          | Joseph W. Sarno        | tt0063213 |
| 1746574524 | 1934 | 1934 | Many Happy Returns                             | Many Happy Returns                             | McLeod, Norman      | Norman Z. McLeod       | tt0025468 |
| 1746554691 | 1964 | 1964 | A Tiger Walks                                  | A Tiger Walks                                  | Tokar, Norman       | Norman Tokar           | tt0058657 |
| 1746500411 | 1926 | 1926 | When the Wife's Away                           | When the Wife's Away                           | Strayer, Frank R.   | Frank R. Strayer       | tt0017547 |
| 1746502369 | 1916 | 1916 | Bobbie of the Ballet                           | Bobbie of the Ballet                           | De Grasse, Joseph   | Joseph De Grasse       | tt0006443 |
| 1746409973 | 1981 | 1981 | Excalibur                                      | Excalibur                                      | Boorman, John       | John Boorman           | tt0082348 |
| 1746502326 | 1915 | 1915 | The Winged Idol                                | The Winged Idol                                | Sidney, Scott       | Scott Sidney           | tt0006294 |
| 1746499941 | 1945 | 1944 | Resisting Enemy Interrogation                  | Resisting Enemy Interrogation                  |                     | Bernard Vorhaus        | tt0037215 |
| 1746208678 | 1967 | 1967 | The Trip                                       | The Trip                                       | Corman, Roger       | Roger Corman           | tt0062395 |
| 1746582964 | 1937 | 1937 | Midnight Madonna                               | Midnight Madonna                               | Flood, James        | James Flood            | tt0029239 |
| 1746577027 | 1960 | 1960 | The Prime Time                                 | The Prime Time                                 | Weisenborn, Gordon  | Gordon Weisenborn      | tt0054206 |
| 1746509237 | 1925 | 1925 | The Mad Dancer                                 | The Mad Dancer                                 | King, Burton        | Burton L. King         | tt0016061 |
| 1745341835 | 2008 | 2008 | Redbelt                                        | Redbelt                                        | Mamet, David        | David Mamet            | tt1012804 |
| 1746584410 | 1940 | 1940 | 'Til We Meet Again                             | 'Til We Meet Again                             | Goulding, Edmund    | Edmund Goulding        | tt0032176 |
| 1746433564 | 1998 | 1998 | The Big Lebowski                               | The Big Lebowski                               | Coen, Joel          | Joel Coen              | tt0118715 |

|            |      |      |                                |                                |                               |                      |            |
|------------|------|------|--------------------------------|--------------------------------|-------------------------------|----------------------|------------|
| 1746500211 | 1926 | 1926 | The Sea Wolf                   | The Sea Wolf                   | Ince, Ralph                   | Ralph Ince           | tt0017358  |
| 1746576874 | 1932 | 1932 | The Vanishing Frontier         | The Vanishing Frontier         | Rosen, Philip E.              | Phil Rosen           | tt0023650  |
| 1746566071 | 1958 | 1958 | Hot Rod Gang                   | Hot Rod Gang                   | Landers, Lew                  | Lew Landers          | tt0051741  |
| 1746580881 | 1937 | 1937 | Super-Sleuth                   | Super Sleuth                   | Stoloff, Ben                  | Benjamin Stoloff     | tt0029622  |
| 1746584331 | 1940 | 1940 | Men with Steel Faces           | Men with Steel Faces           | Brower, Otto; Eason, Breezy   | Otto Brower          | tt0032782  |
| 1746515097 | 1922 | 1922 | Ridin' Wild                    | Ridin' Wild                    | Ross, Nat                     | Nat Ross             | tt0013552  |
| 1746581598 | 1951 | 1951 | Best of the Badmen             | Best of the Badmen             | Russell, William D.           | William D. Russell   | tt0043335  |
| 1746233863 | 1967 | 1967 | The Incident                   | The Incident                   | Peerce, Larry                 | Larry Peerce         | tt0061814  |
| 1746565878 | 1957 | 1957 | Loving You                     | Loving You                     | Kanter, Hal                   | Hal Kanter           | tt0050659  |
| 1746578956 | 1963 | 1963 | Dementia 13                    | Dementia 13                    | Coppola, Francis              | Francis Ford Coppola | tt0056983  |
| 1746465265 | 1941 | 1941 | Two Latins from Manhattan      | Two Latins from Manhattan      | Barton, Charles               | Charles Barton       | tt0034325  |
| 1746565874 | 1953 | 1953 | Jack Slade                     | Jack Slade                     | Schuster, Harold              | Harold D. Schuster   | tt0045925  |
| 1746584150 | 1935 | 1935 | The Florentine Dagger          | The Florentine Dagger          | Florey, Robert                | Robert Florey        | tt0026369  |
| 1746566041 | 1958 | 1959 | Guns, Girls and Gangsters      | Guns Girls and Gangsters       | Cahn, Edward L.               | Edward L. Cahn       | tt0052870  |
| 1746424011 | 1942 | 1942 | The Omaha Trail                | The Omaha Trail                | Buzzell, Edward; Cahn, Edward | Edward Buzzell       | tt0035149  |
| 1746577483 | 1950 | 1950 | Nancy Goes to Rio              | Nancy Goes to Rio              | Leonard, Robert Z.            | Robert Z. Leonard    | tt0042779  |
| 1746216813 | 1968 | 1968 | Live a Little, Love a Little   | Live a Little, Love a Little   | Taurog, Norman                | Norman Taurog        | tt0063231  |
| 1746524758 | 1922 | 1922 | Confidence                     | Confidence                     | Pollard, Harry                | Harry A. Pollard     | tt0013023  |
| 1746437925 | 1942 | 1942 | Below the Border               | Below the Border               | Bretherton, Howard P.         | Howard Bretherton    | tt0034505  |
| 1746584608 | 1929 | 1929 | Wedding Rings                  | Wedding Rings                  | Beaudine, William             | William Beaudine     | tt0021537  |
| 1746584606 | 1929 | 1929 | Rich People                    | Rich People                    | Griffith, Edward H.           | Edward H. Griffith   | tt0020328  |
| 1746184030 | 1910 | 1910 | Billy's Sister                 | Billy's Sister                 |                               |                      | tt0833426  |
| 1746492718 | 1948 | 1948 | The Return of October          | The Return of October          | Lewis, Joseph H.              | Joseph H. Lewis      | tt0040730  |
| 1746507600 | 1924 | 1924 | Passion's Pathway              | Passion's Pathway              | Bracken, Bertram              | Bertram Bracken      | tt0015216  |
| 1746507785 | 1925 | 1925 | Three Weeks in Paris           | Three Weeks in Paris           | Del Ruth, Roy                 | Roy Del Ruth         | tt0017466  |
| 1746508383 | 1949 | 1949 | Johnny Stool Pigeon            | Johnny Stool Pigeon            | Castle, William               | William Castle       | tt0041529  |
| 1746473718 | 1944 | 1944 | Abroad with Two Yanks          | Abroad with Two Yanks          | Dwan, Allan                   | Allan Dwan           | tt0036578  |
| 1746507743 | 1926 | 1926 | The Hurricane                  | The Hurricane                  | Caldwell, Fred                | Fred Caldwell        | tt00327907 |
| 1746542754 | 1950 | 1949 | Bodyhold                       | Bodyhold                       | Friedman, Seymour             | Seymour Friedman     | tt0041191  |
| 1746503449 | 1921 | 1921 | His Brother's Keeper           | His Brother's Keeper           | North, Wilfrid                | Wilfrid North        | tt0011295  |
| 1746581049 | 1950 | 1950 | Quicksand                      | Quicksand                      | Pichel, Irving                | Irving Pichel        | tt0042869  |
| 1746453638 | 1942 | 1942 | Enemy Agents Meet Ellery Queen | Enemy Agents Meet Ellery Queen | Hogan, James                  | James P. Hogan       | tt0034703  |
| 1746418489 | 1940 | 1940 | On Their Own                   | On Their Own                   | Brower, Otto                  | Otto Brower          | tt0032867  |
| 1746453559 | 1943 | 1942 | Northwest Rangers              | Northwest Rangers              | Newman, Joe                   | Joseph M. Newman     | tt0035134  |
| 1746248879 | 1979 | 1979 | Scavenger Hunt                 | Scavenger Hunt                 | Schultz, Michael              | Michael Schultz      | tt0079858  |
| 1746422011 | 1997 | 1997 | Mr. Magoo                      | Mr. Magoo                      | Tong, Stanley                 | Stanley Tong         | tt0119718  |
| 1746574507 | 1934 | 1934 | Side Streets                   | Side Streets                   | Green, Alfred E.              | Alfred E. Green      | tt0025788  |
| 1746581168 | 1910 | 1910 | Her Terrible Ordeal            | Her Terrible Ordeal            | Griffith, D. W.               | D. W. Griffith       | tt0001245  |
| 1746217889 | 1967 | 1967 | In the Heat of the Night       | In the Heat of the Night       | Jewison, Norman               | Norman Jewison       | tt0061811  |
| 1746582106 | 1950 | 1950 | Night and the City             | Night and the City             | Dassin, Jules                 | Jules Dassin         | tt0042788  |
| 1746474835 | 1946 | 1946 | Sheriff of Redwood Valley      | Sheriff of Redwood Valley      | Springsteen, R. G.            | R.G. Springsteen     | tt0038936  |
| 1746500044 | 1946 | 1946 | The Caravan Trail              | The Caravan Trail              | Emmett, Robert                | Robert Emmett Tansey | tt0038397  |
| 1746584675 | 1929 | 1929 | This Thing Called Love         | This Thing Called Love         | Stein, Paul L.                | Paul L. Stein        | tt0020494  |
| 1746573858 | 1960 | 1960 | Stop! Look! and Laugh!         | Stop! Look! and Laugh!         | White, Jules                  | Don Appell           | tt0173256  |
| 1746566845 | 1933 | 1933 | Grand Slam                     | Grand Slam                     | Dieterle, William             | William Dieterle     | tt0024078  |
| 1746495805 | 1918 | 1918 | Just a Woman                   | Just a Woman                   | Steger, Julius                | Julius Steger        | tt0184630  |
| 1746464888 | 1942 | 1942 | Affairs of Jimmy Valentine     | The Affairs of Jimmy Valentine | Vorhaus, Bernard              | Bernard Vorhaus      | tt0034432  |
| 1745357739 | 2004 | 2004 | Dawn of the Dead               | Dawn of the Dead               | Snyder, Zack                  | Zack Snyder          | tt0363547  |
| 1746514820 | 1913 | 1913 | Caprice                        | Caprice                        |                               | J. Searle Dawley     | tt0002736  |
| 1746185161 | 1965 | 1965 | The Fool Killer                | The Fool Killer                | González, Servando            | Servando González    | tt0059190  |
| 1746503307 | 1918 | 1918 | She Hired a Husband            | She Hired a Husband            | Dillon, Jack                  | John Francis Dillon  | tt0009602  |
| 1746520543 | 1927 | 1927 | Underworld                     | Underworld                     | Sternberg, Josef von          | Josef von Sternberg  | tt0018526  |
| 1746514347 | 1927 | 1927 | Ginsberg the Great             | Ginsberg the Great             | Haskin, Byron                 | Byron Haskin         | tt0017932  |
| 1745359736 | 2004 | 2004 | Saw                            | Saw                            | Wan, James                    | James Wan            | tt0387564  |
| 1746467259 | 1917 | 1917 | All for a Husband              | All for a Husband              | Harbaugh, Carl                | Carl Harbaugh        | tt0007625  |
| 1746500300 | 1924 | 1924 | The Lone Chance                | The Lone Chance                | Mitchell, Howard              | Howard M. Mitchell   | tt0015078  |
| 1746438287 | 1941 | 1941 | Shadows on the Stairs          | Shadows on the Stairs          | Lederman, D. Ross             | D. Ross Lederman     | tt0034173  |

|            |      |      |                                      |                                      |                                  |                                     |           |
|------------|------|------|--------------------------------------|--------------------------------------|----------------------------------|-------------------------------------|-----------|
| 1746563330 | 1952 | 1951 | Oriental Evil                        | Oriental Evil                        | Breakston, George; Stahl, C. Ray | George P. Breakston                 | tt0042815 |
| 1746577508 | 1938 | 1938 | Policy Man                           | Policy Man                           |                                  |                                     | tt0030596 |
| 1746234781 | 1973 | 1973 | Your Three Minutes Are Up            | Your Three Minutes Are Up            | Schwartz, Douglas N.             | Douglas Schwartz                    | tt0070945 |
| 1746503633 | 1920 | 1920 | Voices                               | Voices                               | De Vonde, Chester                | Chester De Vonde                    | tt0011832 |
| 1746453758 | 1943 | 1943 | Princess O'Rourke                    | Princess O'Rourke                    | Krasna, Norman                   | Norman Krasna                       | tt0036277 |
| 1746564429 | 1953 | 1953 | Angel Face                           | Angel Face                           | Preminger, Otto                  | Otto Preminger                      | tt0044357 |
| 1746257216 | 1978 | 1978 | Jaws 2                               | Jaws 2                               | Szwarc, Jeannot                  | Jeannot Szwarc                      | tt0077766 |
| 1746574847 | 1935 | 1935 | Doubting Thomas                      | Doubting Thomas                      | Butler, David                    | David Butler                        | tt0026292 |
| 1746584965 | 1940 | 1940 | Pier 13                              | Pier 13                              | Forde, Eugene                    | Eugene Forde                        | tt0032908 |
| 1746218773 | 1973 | 1973 | American Graffiti                    | American Graffiti                    | Lucas, George                    | George Lucas                        | tt0069704 |
| 1769970002 | 1911 | 1911 | His Vacation                         | His Vacation                         |                                  | Tom Ricketts                        | tt1277433 |
| 1746501567 | 1915 | 1915 | The Puppet Crown                     | The Puppet Crown                     | Melford, George                  | George Melford                      | tt0005935 |
| 1746473900 | 1945 | 1945 | Northwest Trail                      | Northwest Trail                      | Abrahams, Derwin                 | Derwin Abrahams                     | tt0037949 |
| 1746436047 | 1941 | 1941 | We Go Fast                           | We Go Fast                           | McGann, William                  | William C. McGann                   | tt0034375 |
| 1746475017 | 1947 | 1946 | Big Town                             | Big Town                             | Thomas, William C.               | William C. Thomas                   | tt0039186 |
| 1746503032 | 1914 | 1914 | In the Days of the Thundering Herd   | In the Days of the Thundering Herd   | Campbell, Colin                  | Colin Campbell                      | tt0003724 |
| 1746569755 | 1958 | 1958 | Johnny Rocco                         | Johnny Rocco                         | Landres, Paul                    | Paul Landres                        | tt0051800 |
| 1746392880 | 1985 | 1985 | Fool for Love                        | Fool for Love                        | Altman, Robert                   | Robert Altman                       | tt0089160 |
| 1746543064 | 1916 | 1916 | The Courtesan                        | The Courtesan                        | Maude, Arthur                    | Arthur Maude                        | tt0157487 |
| 1746580224 | 1936 | 1935 | Sylvia Scarlett                      | Sylvia Scarlett                      | Cukor, George                    | George Cukor                        | tt0027067 |
| 1746582484 | 1938 | 1938 | Prison Break                         | Prison Break                         | Lubin, Arthur                    | Arthur Lubin                        | tt0030625 |
| 1746437836 | 1944 | 1944 | Laura                                | Laura                                | Preminger, Otto                  | Otto Preminger                      | tt0037008 |
| 1746408872 | 1984 | 1984 | Moscow on the Hudson                 | Moscow on the Hudson                 | Mazursky, Paul                   | Paul Mazursky                       | tt0087747 |
| 1746435836 | 1992 | 1992 | Unforgiven                           | Unforgiven                           | Eastwood, Clint                  | Clint Eastwood                      | tt0105695 |
| 1746585315 | 1929 | 1929 | The Charlatan                        | The Charlatan                        | Melford, George                  | George Melford                      | tt0019757 |
| 1746210574 | 1973 | 1973 | Terminal Island                      | Terminal Island                      | Rothman, Stephanie               | Stephanie Rothman                   | tt0070782 |
| 1746574581 | 1937 | 1937 | Roaring Six Guns                     | Roaring Six Guns                     | McGowan, J. P.                   | J.P. McGowan                        | tt0030686 |
| 1746577546 | 1934 | 1934 | Laughing Boy                         | Laughing Boy                         | Van Dyke, W. S.                  | W.S. Van Dyke                       | tt0025371 |
| 1746503575 | 1920 | 1920 | Honest Hutch                         | Honest Hutch                         | Badger, Clarence G.              | Clarence G. Badger                  | tt0011303 |
| 1745302746 | 2005 | 2005 | The Hitchhiker's Guide to the Galaxy | The Hitchhiker's Guide to the Galaxy | Jennings, Garth                  | Garth Jennings                      | tt0371724 |
| 1746433987 | 1998 | 1998 | Six-String Samurai                   | Six String Samurai                   | Mungia, Lance                    | Lance Mungia                        | tt0118736 |
| 1746465233 | 1942 | 1942 | The Falcon Takes Over                | The Falcon Takes Over                | Reis, Irving                     | Irving Reis                         | tt0034716 |
| 1746582291 | 1930 | 1930 | Bright Lights                        | Bright Lights                        | Curtiz, Michael                  | Michael Curtiz                      | tt0020713 |
| 1746475657 | 1948 | 1948 | Stage Struck                         | Stage Struck                         | Nigh, William                    | William Nigh                        | tt0040832 |
| 1746409279 | 1987 | 1987 | The Pick-Up Artist                   | The Pick up Artist                   | Toback, James                    | James Toback                        | tt0093737 |
| 1746576938 | 1960 | 1960 | Thunder in Carolina                  | Thunder in Carolina                  | Helmick, Paul                    | Paul Helmick                        | tt0054385 |
| 1746584883 | 1939 | 1939 | Daughter of the Tong                 | Daughter of the Tong                 | Johnson, Raymond K.              | Bernard B. Ray                      | tt0031211 |
| 1745302544 | 2005 | 2005 | The Fog                              | The Fog                              | Wainwright, Rupert               | Rupert Wainwright                   | tt0432291 |
| 1746524986 | 1927 | 1927 | The Angel of Broadway                | The Angel of Broadway                | Weber, Lois                      | Lois Weber                          | tt0017630 |
| 1746524370 | 1914 | 1914 | The Bargain                          | The Bargain                          | Barker, Reginald                 | Reginald Barker                     | tt0003657 |
| 1746503714 | 1917 | 1917 | Her Sister                           | Her Sister                           | O'Brien, John B.                 | John B. O'Brien                     | tt0175728 |
| 1746582847 | 1935 | 1935 | The Ghost Rider                      | The Ghost Rider                      | Jevne, Jack                      | Jack Jevne                          | tt0026407 |
| 1746562071 | 1956 | 1956 | Screaming Eagles                     | Screaming Eagles                     | Haas, Charles                    | Charles F. Haas                     | tt0049728 |
| 1746501403 | 1914 | 1914 | The Opened Shutters                  | The Opened Shutters                  | Turner, Otis                     | Otis Turner                         | tt0004435 |
| 1746585022 | 1940 | 1940 | Chad Hanna                           | Chad Hanna                           | King, Henry                      | Henry King                          | tt0032321 |
| 1746209176 | 1967 | 1967 | Beach Red                            | Beach Red                            | Wilde, Cornel                    | Cornel Wilde                        | tt0061389 |
| 1746424441 | 1941 | 1941 | Navy Blues                           | Navy Blues                           | Bacon, Lloyd                     | Lloyd Bacon                         | tt0033942 |
| 1746512773 | 1912 | 1912 | Alkali Ike's Boarding House          | Alkali Ike's Boarding House          | Anderson, G. M.                  | Gilbert M. 'Broncho Billy' Anderson | tt0002007 |
| 1746508010 | 1926 | 1926 | Readin' 'Ritin' 'Rithmetic           | Readin', 'Ritin', 'Rithmetic         | Eddy, Robert                     | Robert Eddy                         | tt0017313 |
| 1746582449 | 1935 | 1935 | Thanks a Million                     | Thanks a Million                     | Del Ruth, Roy                    | Roy Del Ruth                        | tt0027088 |
| 1746455166 | 1998 | 1997 | The Only Thrill                      | The Only Thrill                      | Masterson, Peter                 | Peter Masterson                     | tt0119837 |
| 1746583408 | 1929 | 1929 | False Fathers                        | False Fathers                        | Carpenter, Horace B.             | Horace B. Carpenter                 | tt0019866 |
| 1746524988 | 1914 | 1914 | The Quest of the Sacred Jewel        | The Quest of the Sacred Jewel        | Fitzmaurice, George              | George Fitzmaurice                  | tt0004507 |
| 1746580417 | 1935 | 1935 | Welcome Home                         | Welcome Home                         | Tinling, James                   | James Tinling                       | tt0027191 |
| 1746454821 | 1945 | 1945 | The Southerner                       | The Southerner                       | Renoir, Jean                     | Jean Renoir                         | tt0038107 |
| 1745282564 | 2005 | 2005 | Are We There Yet?                    | Are We There Yet?                    | Levant, Brian                    | Brian Levant                        | tt0368578 |
| 1746475959 | 1946 | 1946 | Live Wires                           | Live Wires                           | Karlson, Phil                    | Phil Karlson                        | tt0038699 |

|            |      |      |                                 |                                 |                                  |                                     |           |
|------------|------|------|---------------------------------|---------------------------------|----------------------------------|-------------------------------------|-----------|
| 1746497523 | 1922 | 1922 | Red Hot Romance                 | Red Hot Romance                 | Fleming, Victor                  | Victor Fleming                      | tt0013540 |
| 1746570983 | 1933 | 1933 | Before Dawn                     | Before Dawn                     | Pichel, Irving                   | Irving Pichel                       | tt0023790 |
| 1746248229 | 1966 | 1965 | The Devil's Mistress            | The Devil's Mistress            | Wanzer, Orville                  | Orville Wanzer                      | tt0126865 |
| 1746409517 | 1991 | 1991 | Doc Hollywood                   | Doc Hollywood                   | Caton-Jones, Michael             | Michael Caton                       | tt0101745 |
| 1746566072 | 1955 | 1955 | Strange Lady in Town            | Strange Lady in Town            | LeRoy, Mervyn                    | Mervyn LeRoy                        | tt0048665 |
| 1746502791 | 1915 | 1915 | The Price                       | The Price                       | Golden, Joseph A.                | Joseph A. Golden                    | tt0005926 |
| 1746571305 | 1910 | 1910 | A Dog on Business               | A Dog on Business               |                                  | Gilbert M. 'Broncho Billy' Anderson | tt0372242 |
| 1746566250 | 1953 | 1953 | Terror on a Train               | Terror on a Train               | Tetzlaff, Ted                    | Ted Tetzlaff                        | tt0046432 |
| 1746560829 | 1932 | 1932 | The Sport Parade                | The Sport Parade                | Murphy, Dudley                   | Dudley Murphy                       | tt0022918 |
| 1746584938 | 1940 | 1940 | Typhoon                         | Typhoon                         | King, Louis                      | Louis King                          | tt0033196 |
| 1746580462 | 1939 | 1939 | Buried Alive                    | Buried Alive                    | Halperin, Victor                 | Victor Halperin                     | tt0031126 |
| 1746420219 | 1983 | 1983 | Getting It On                   | Getting It On                   | Olsen, William                   | William Olsen                       | tt0085588 |
| 1746562438 | 1956 | 1956 | Comanche                        | Comanche                        | Sherman, George                  | George Sherman                      | tt0049086 |
| 1746440170 | 1998 | 1998 | Fallen                          | Fallen                          | Hoblit, Gregory                  | Gregory Hoblit                      | tt0119099 |
| 1746569597 | 1953 | 1953 | The Twonky                      | The Twonky                      | Oboler, Arch                     | Arch Oboler                         | tt0046475 |
| 1746563912 | 1952 | 1952 | Against All Flags               | Against All Flags               | Sherman, George                  | George Sherman                      | tt0044333 |
| 1746485549 | 1917 | 1917 | Fighting Odds                   | Fighting Odds                   | Dwan, Allan                      | Allan Dwan                          | tt0007944 |
| 1745282599 | 2005 | 2005 | Protocols of Zion               | Protocols of Zion               | Levin, Marc                      | Marc Levin                          | tt0436686 |
| 1745396225 | 2010 | 2010 | The Runaways                    | The Runaways                    | Sigismondi, Floria               | Floria Sigismondi                   | tt1017451 |
| 1746198662 | 1969 | 1969 | Midas Run                       | Midas Run                       | Kjellin, Alf                     | Alf Kjellin                         | tt0064664 |
| 1746578375 | 1959 | 1959 | John Paul Jones                 | John Paul Jones                 | Farrow, John                     | John Farrow                         | tt0052946 |
| 1746524735 | 1914 | 1914 | Called Back                     | Called Back                     | Turner, Otis                     | Henry Otto                          | tt3418528 |
| 1746394198 | 1989 | 1989 | The Fly II                      | The Fly II                      | Walas, Chris                     | Chris Walas                         | tt0097368 |
| 1746523700 | 1916 | 1916 | The Highest Bid                 | The Highest Bid                 | Prescott, Jack; Russell, William | William Russell                     | tt0157755 |
| 1746583190 | 1929 | 1929 | The Winged Horseman             | The Winged Horseman             | Rosson, Arthur; Eason, Reeves    | B. Reeves Eason                     | tt0020592 |
| 1746578469 | 1962 | 1962 | The Broken Land                 | The Broken Land                 | Bushelman, John                  | John A. Bushelman                   | tt0055811 |
| 1746465079 | 1947 | 1947 | Miracle on 34th Street          | Miracle on 34th Street          | Seaton, George                   | George Seaton                       | tt0039628 |
| 1746514683 | 1927 | 1927 | The Girl in the Pullman         | The Girl in the Pullman         | Kenton, Erle                     | Erle C. Kenton                      | tt0017936 |
| 1746475993 | 1948 | 1947 | Captain from Castile            | Captain from Castile            | King, Henry                      | Henry King                          | tt0039243 |
| 1746235622 | 1975 | 1975 | The Master Gunfighter           | The Master Gunfighter           | Laughlin, Frank                  | Tom Laughlin                        | tt0073357 |
| 1746566182 | 1953 | 1953 | Sins of Jezebel                 | Sins of Jezebel                 | Le Borg, Reginald                | Reginald Le Borg                    | tt0046320 |
| 1746270726 | 1978 | 1978 | Avalanche                       | Avalanche                       | Allen, Corey                     | Corey Allen                         | tt0077189 |
| 1746583905 | 1930 | 1930 | Along Came Youth                | Along Came Youth                | Corrigan, Lloyd; McLeod, Norman  | Lloyd Corrigan                      | tt0020634 |
| 1746560467 | 1965 | 1965 | Monster A Go-Go!                | Monster A Go Go                 | Seymour, Sheldon                 | Bill Rebane                         | tt0059464 |
| 1746524788 | 1928 | 1928 | Nameless Men                    | Nameless Men                    | Cabanne, Christy                 | Christy Cabanne                     | tt0019202 |
| 1746514923 | 1916 | 1915 | Dizzy Heights and Daring Hearts | Dizzy Heights and Daring Hearts | Wright, Walter                   | Walter Wright                       | tt0005204 |
| 1746514245 | 1922 | 1922 | Clarence                        | Clarence                        | de Mille, William C.             | William C. de Mille                 | tt0013016 |
| 1746567259 | 1932 | 1932 | The Texas Bad Man               | The Texas Bad Man               | Laemmle, Edward                  | Edward Laemmle                      | tt0023565 |
| 1746533227 | 1915 | 1915 | The Pearl of the Antilles       | The Pearl of the Antilles       | Terriss, Tom                     | Tom Terriss                         | tt0005876 |
| 1746583331 | 1951 | 1951 | Cave of Outlaws                 | Cave of Outlaws                 | Castle, William                  | William Castle                      | tt0043392 |
| 1746492592 | 1948 | 1948 | Song of the Drifter             | Song of the Drifter             | Hillyer, Lambert                 | Lambert Hillyer                     | tt0163265 |
| 1746583864 | 1931 | 1931 | Laugh and Get Rich              | Laugh and Get Rich              | La Cava, Gregory                 | Gregory La Cava                     | tt0022056 |
| 1746393959 | 1988 | 1988 | Cocoon: The Return              | Cocoon: The Return              | Petrie, Daniel                   | Daniel Petrie                       | tt0094890 |
| 1746500423 | 1949 | 1949 | Colorado Territory              | Colorado Territory              | Walsh, Raoul                     | Raoul Walsh                         | tt0041253 |
| 1746585224 | 1930 | 1930 | Journey's End                   | Journey's End                   | Whale, James                     | James Whale                         | tt0021013 |
| 1746465149 | 1944 | 1944 | Ghost Catchers                  | Ghost Catchers                  | Cline, Eddie                     | Edward F. Cline                     | tt0036861 |
| 1746582286 | 1930 | 1930 | The Big Trail                   | The Big Trail                   | Walsh, Raoul                     | Raoul Walsh                         | tt0020691 |
| 1746503029 | 1916 | 1916 | Salvation Joan                  | Salvation Joan                  | North, Wilfred                   | Wilfrid North                       | tt0007284 |
| 1746218760 | 1973 | 1973 | Scarecrow                       | Scarecrow                       | Schatzberg, Jerry                | Jerry Schatzberg                    | tt0070643 |
| 1746571362 | 1934 | 1934 | City Limits                     | City Limits                     | Nigh, William                    | William Nigh                        | tt0024984 |
| 1746409083 | 1988 | 1988 | Clara's Heart                   | Clara's Heart                   | Mulligan, Robert                 | Robert Mulligan                     | tt0094882 |
| 1746218005 | 1966 | 1966 | Nevada Smith                    | Nevada Smith                    | Hathaway, Henry                  | Henry Hathaway                      | tt0060748 |
| 1746573856 | 1960 | 1959 | Teenage Zombies                 | Teenage Zombies                 | Warren, Jerry                    | Jerry Warren                        | tt0051064 |
| 1746211471 | 1974 | 1974 | Newman's Law                    | Newman's Law                    | Heffron, Richard                 | Richard T. Heffron                  | tt0071902 |
| 1746570757 | 1952 | 1952 | The Outcasts of Poker Flat      | The Outcasts of Poker Flat      | Newman, Joseph M.                | Joseph M. Newman                    | tt0045003 |
| 1746578743 | 1961 | 1961 | The Naked Edge                  | The Naked Edge                  | Anderson, Michael                | Michael Anderson                    | tt0055214 |
| 1746259648 | 1978 | 1978 | The Swarm                       | The Swarm                       | Allen, Irwin                     | Irwin Allen                         | tt0078350 |



|            |      |      |                                        |                                        |                                    |                    |            |
|------------|------|------|----------------------------------------|----------------------------------------|------------------------------------|--------------------|------------|
| 1746576254 | 1931 | 1931 | Compromised                            | Compromised                            | Adolfi, John G.                    | John G. Adolfi     | tt0021757  |
| 1746465234 | 1946 | 1945 | Leave Her to Heaven                    | Leave Her to Heaven                    | Stahl, John M.                     | John M. Stahl      | tt0037865  |
| 1746497012 | 1920 | 1920 | Who's Your Servant?                    | Who's Your Servant?                    |                                    |                    | tt0011864  |
| 1746437095 | 2000 | 2000 | Little Nicky                           | Little Nicky                           | Brill, Steven                      | Steven Brill       | tt0185431  |
| 1746570441 | 1933 | 1933 | Dance Girl Dance                       | Dance, Girl, Dance                     | Strayer, Frank R.                  | Frank R. Strayer   | tt0023925  |
| 1746584189 | 1937 | 1937 | Atlantic Flight                        | Atlantic Flight                        | Nigh, William                      | William Nigh       | tt0028592  |
| 1746570444 | 1952 | 1952 | The Duel at Silver Creek               | The Duel at Silver Creek               | Siegel, Don                        | Don Siegel         | tt0044573  |
| 1746436940 | 1995 | 1995 | Nine Months                            | Nine Months                            | Columbus, Chris                    | Chris Columbus     | tt0113986  |
| 1746435352 | 1992 | 1992 | Thunderheart                           | Thunderheart                           | Apted, Michael                     | Michael Apted      | tt0105585  |
| 1746566097 | 1958 | 1958 | How to Make a Monster                  | How to Make a Monster                  | Strock, Herbert L.                 | Herbert L. Strock  | tt0051746  |
| 1745340151 | 2001 | 2001 | Serendipity                            | Serendipity                            | Chelsom, Peter                     | Peter Chelsom      | tt0240890  |
| 1746422580 | 1998 | 1998 | Pi                                     | Pi                                     | Aronofsky, Darren                  | Darren Aronofsky   | tt0138704  |
| 1746515011 | 1910 | 1910 | The Wife of Marcius                    | The Wife of Marcius                    |                                    |                    | tt0306232  |
| 1745293908 | 2005 | 2005 | Rent                                   | Rent                                   | Columbus, Chris                    | Chris Columbus     | tt0294870  |
| 1746533024 | 1915 | 1915 | Sealed Lips                            | Sealed Lips                            | Ince, John                         | John Ince          | tt0006014  |
| 1746578518 | 1959 | 1959 | The Devil's Disciple                   | The Devil's Disciple                   | Hamilton, Guy; Mackendrick, Alexan | Guy Hamilton       | tt0052735  |
| 1746473689 | 1946 | 1945 | Kitty                                  | Kitty                                  | Leisen, Mitchell                   | Mitchell Leisen    | tt0037849  |
| 1746420356 | 1990 | 1990 | Desperate Hours                        | Desperate Hours                        | Cimino, Michael                    | Michael Cimino     | tt0099409  |
| 1746554147 | 1964 | 1964 | Walk a Tightrope                       | Walk a Tightrope                       | Nesbitt, Frank                     | Frank Nesbitt      | tt0260526  |
| 1746584941 | 1939 | 1938 | Zaza                                   | Zaza                                   | Cukor, George                      | George Cukor       | tt0032157  |
| 1746577690 | 1933 | 1933 | Russia Today                           | Russia Today                           | Bryan, Julien                      | Mrs. Carveth Wells | tt1270683  |
| 1746474515 | 1948 | 1948 | Back Trail                             | Back Trail                             | Cabanne, Christy                   | Christy Cabanne    | tt0040144  |
| 1746514629 | 1923 | 1923 | The Silent Partner                     | The Silent Partner                     | Maigne, Charles                    | Charles Maigne     | tt0014470  |
| 1746422266 | 1990 | 1990 | Ghost                                  | Ghost                                  | Zucker, Jerry                      | Jerry Zucker       | tt0099653  |
| 1746233014 | 1967 | 1967 | The Wild Rebels                        | The Wild Rebels                        | Grefé, William                     | William Grefé      | tt0062493  |
| 1746585083 | 1930 | 1930 | The Man From Nowhere                   | The Man from Nowhere                   | McGowan, J. P.                     | J.P. McGowan       | tt0021116  |
| 1746575798 | 1931 | 1931 | Aloha                                  | Aloha                                  | Rogell, Albert                     | Albert S. Rogell   | tt0021602  |
| 1746573942 | 1960 | 1960 | Dalton That Got Away                   | The Dalton That Got Away               | Salvador, Jaime                    | Jaime Salvador     | tt00202843 |
| 1746211218 | 1970 | 1970 | The Great White Hope                   | The Great White Hope                   | Ritt, Martin                       | Martin Ritt        | tt0065797  |
| 1746455102 | 1998 | 1998 | Lenny Bruce: Swear to Tell the Truth   | Lenny Bruce: Swear to Tell the Truth   | Weide, Robert B.                   | Robert B. Weide    | tt0175844  |
| 1746500958 | 1914 | 1914 | McVeagh of the South Seas              | McVeagh of the South Seas              | Carey, Harry; Bruce, Cyril         | Cyril Bruce        | tt0004319  |
| 1745302534 | 2006 | 2005 | Boynton Beach Club                     | Boynton Beach Club                     | Seidelman, Susan                   | Susan Seidelman    | tt0439478  |
| 1746512043 | 1915 | 1915 | The Beachcomber                        | The Beachcomber                        |                                    | Phil Rosen         | tt0004950  |
| 1746394713 | 1984 | 1984 | Teachers                               | Teachers                               | Hiller, Arthur                     | Arthur Hiller      | tt0088242  |
| 1746209161 | 1967 | 1967 | Ski on the Wild Side                   | Ski on the Wild Side                   | Miller, Warren                     | Warren Miller      | tt0062274  |
| 1746520346 | 1926 | 1926 | Gasoline Cowboy                        | Gasoline Cowboy                        | Reel, Frederick                    | Frederick Reel Jr. | tt0325450  |
| 1746409079 | 1985 | 1985 | The Goonies                            | The Goonies                            | Donner, Richard                    | Richard Donner     | tt0089218  |
| 1746454610 | 1940 | 1940 | Three Faces West                       | Three Faces West                       | Vorhaus, Bernard                   | Bernard Vorhaus    | tt0033159  |
| 1746508545 | 1925 | 1925 | The Desert Flower                      | The Desert Flower                      | Cummings, Irving                   | Irving Cummings    | tt0015745  |
| 1746566079 | 1955 | 1955 | Love Is a Many-Splendored Thing        | Love Is a Many Splendored Thing        | King, Henry                        | Henry King         | tt0048316  |
| 1746410164 | 1989 | 1989 | Parenthood                             | Parenthood                             | Howard, Ron                        | Ron Howard         | tt0098067  |
| 1746394658 | 1983 | 1983 | Mausoleum                              | Mausoleum                              | Dugan, Michael                     | Michael Dugan      | tt0085918  |
| 1746500253 | 1926 | 1926 | Pals First                             | Pals First                             | Carewe, Edwin                      | Edwin Carewe       | tt0017245  |
| 1746499948 | 1923 | 1923 | The Forbidden Trail                    | The Forbidden Trail                    | Bradbury, Robert North             | Robert N. Bradbury | tt0132973  |
| 1746523418 | 1910 | 1910 | Love Among the Roses                   | Love Among the Roses                   | Griffith, D. W.                    | D.W. Griffith      | tt0001292  |
| 1746408679 | 1984 | 1984 | Cheech & Chong's The Corsican Brothers | Cheech & Chong's The Corsican Brothers | Chong, Thomas                      | Tommy Chong        | tt0087042  |
| 1746501214 | 1911 | 1911 | An Arizona Romance                     | An Arizona Romance                     | Beal, Frank                        | Frank Beal         | tt1164547  |
| 1746584835 | 1929 | 1929 | Trent's Last Case                      | Trent's Last Case                      | Hawks, Howard                      | Howard Hawks       | tt0020513  |
| 1746453476 | 1942 | 1942 | Red River Robin Hood                   | Red River Robin Hood                   | Selander, Lesley                   | Lesley Selander    | tt0036296  |
| 1746532850 | 1914 | 1914 | The Governor's Ghost                   | The Governor's Ghost                   | Davis, Will S.                     | Will S. Davis      | tt0004031  |
| 1746424420 | 1940 | 1940 | Alias the Deacon                       | Alias the Deacon                       | Cabanne, Christy                   | Christy Cabanne    | tt0032191  |
| 1746492714 | 1944 | 1944 | Going My Way                           | Going My Way                           | McCarey, Leo                       | Leo McCarey        | tt0036872  |
| 1746574201 | 1960 | 1959 | A Dog's Best Friend                    | A Dog's Best Friend                    | Cahn, Edward L.                    | Edward L. Cahn     | tt0053776  |
| 1746473931 | 1943 | 1943 | Yanks Ahoy                             | Yanks Ahoy                             | Neumann, Kurt                      | Kurt Neumann       | tt0036548  |
| 1746582960 | 1938 | 1938 | Passport Husband                       | Passport Husband                       | Tinling, James                     | James Tinling      | tt0030562  |
| 1746503718 | 1922 | 1922 | The World's a Stage                    | The World's a Stage                    | Campbell, Colin                    | Colin Campbell     | tt0013791  |
| 1746562280 | 1953 | 1953 | Gun Fury                               | Gun Fury                               | Walsh, Raoul                       | Raoul Walsh        | tt0045846  |

|            |      |      |                                   |                                   |                                      |                        |           |
|------------|------|------|-----------------------------------|-----------------------------------|--------------------------------------|------------------------|-----------|
| 1746574613 | 1935 | 1935 | The Man from Guntown              | The Man from Guntown              | Beebe, Ford                          | Ford Beebe             | tt0026673 |
| 1746466559 | 1917 | 1917 | A Modern Monte Cristo             | A Modern Monte Cristo             | Moore, W. Eugene                     | Eugene Moore           | tt0178759 |
| 1746464902 | 1941 | 1941 | Mystery Ship                      | Mystery Ship                      | Landers, Lew                         | Lew Landers            | tt0033934 |
| 1746575055 | 1934 | 1934 | A Very Honorable Guy              | A Very Honorable Guy              | Bacon, Lloyd                         | Lloyd Bacon            | tt0025945 |
| 1746455958 | 1995 | 1995 | Sabrina                           | Sabrina                           | Pollack, Sydney                      | Sydney Pollack         | tt0114319 |
| 1746514365 | 1927 | 1927 | A Hero for a Night                | A Hero for a Night                | Craft, William James                 | William James Craft    | tt0014985 |
| 1746585055 | 1929 | 1929 | Meet The Missus                   | Meet the Missus                   | Gillstrom, Arvid E.                  | Arvid E. Gillstrom     | tt0447285 |
| 1746208295 | 1967 | 1967 | Bikini Paradise                   | Bikini Paradise                   | Tallas, Gregg                        | Gregg G. Tallas        | tt0058970 |
| 1746500224 | 1924 | 1924 | Western Feuds                     | Western Feuds                     | Ford, Francis                        | Francis Ford           | tt0232931 |
| 1746584232 | 1935 | 1935 | Behind the Evidence               | Behind the Evidence               | Hillyer, Lambert                     | Lambert Hillyer        | tt0024871 |
| 1746577627 | 1937 | 1937 | Reckless Ranger                   | Reckless Ranger                   | Bennet, Spencer Gordon               | Spencer Gordon Bennet  | tt0029468 |
| 1746582658 | 1937 | 1937 | Amateur Crook                     | Amateur Crook                     | Katzman, Sam                         | Sam Katzman            | tt0028574 |
| 1746436637 | 1941 | 1941 | Here Comes Happiness              | Here Comes Happiness              | Smith, Noel M.                       | Noel M. Smith          | tt0033711 |
| 1746580430 | 1935 | 1935 | Obeah!                            | Obeah                             | Herrick, F. Herrick                  | F. Herrick Herrick     | tt0026800 |
| 1746393423 | 1984 | 1984 | The Philadelphia Experiment       | The Philadelphia Experiment       | Raffill, Stewart                     | Stewart Raffill        | tt0087910 |
| 1746574533 | 1935 | 1935 | Arizona Trails                    | Arizona Trails                    | James, Alan                          | Victor Adamson         | tt0026081 |
| 1746420133 | 1993 | 1993 | Three of Hearts                   | Three of Hearts                   | Bogayevicz, Yurek                    | Yurek Bogayevicz       | tt0108334 |
| 1746199807 | 1966 | 1966 | Hot Rod Hullabaloo                | Hot Rod Hullabaloo                | Naud, William T.                     | William T. Naud        | tt0060518 |
| 1746504203 | 1918 | 1918 | A Broadway Scandal                | A Broadway Scandal                | De Grasse, Joseph                    | Joseph De Grasse       | tt0008931 |
| 1746564497 | 1951 | 1950 | One Too Many                      | One Too Many                      | Kenton, Erle C.                      | Erle C. Kenton         | tt0042808 |
| 1746509192 | 1924 | 1924 | Traffic in Hearts                 | Traffic in Hearts                 | Dunlap, Scott                        | Scott R. Dunlap        | tt0015424 |
| 1746573607 | 1932 | 1932 | Between Fighting Men              | Between Fighting Men              | Sheldon, Forrest                     | Forrest Sheldon        | tt0022673 |
| 1746438459 | 1944 | 1943 | Around the World                  | Around the World                  | Dwan, Allan                          | Allan Dwan             | tt0035648 |
| 1746570440 | 1933 | 1933 | Riders of Destiny                 | Riders of Destiny                 | Bradbury, Robert N.                  | Robert N. Bradbury     | tt0024500 |
| 1746554427 | 1964 | 1964 | Moonshine Mountain                | Moonshine Mountain                | Lewis, Herschell Gordon              | Herschell Gordon Lewis | tt0058372 |
| 1746574851 | 1934 | 1934 | Love Past Thirty                  | Love Past Thirty                  | Moore, Vin                           | Vin Moore              | tt0025430 |
| 1746524599 | 1913 | 1913 | Hoodman Blind                     | Hoodman Blind                     | Gordon, James                        | James Gordon           | tt0002978 |
| 1746503426 | 1917 | 1917 | Who Shall Take My Life?           | Who Shall Take My Life?           | Campbell, Colin                      | Colin Campbell         | tt0009800 |
| 1746525158 | 1921 | 1921 | The Range Pirate                  | The Range Pirate                  | Franchon, Leonard                    | Leonard Franchon       | tt0012608 |
| 1746583244 | 1951 | 1951 | Two Gals and a Guy                | Two Gals and a Guy                | Green, Alfred E.                     | Alfred E. Green        | tt0044156 |
| 1746439131 | 1941 | 1941 | The Eternal Gift                  | The Eternal Gift                  |                                      | Hugh Calkins           | tt0033579 |
| 1746560622 | 1932 | 1932 | Madame Racketeer                  | Madame Racketeer                  | Hall, Alexander; Gribble, Harry Wags | Harry Wagstaff Gribble | tt0023170 |
| 1746563631 | 1953 | 1953 | Bandits of the West               | Bandits of the West               | Keller, Harry                        | Harry Keller           | tt0045540 |
| 1746500131 | 1946 | 1946 | Death Valley                      | Death Valley                      | Landers, Lew                         | Lew Landers            | tt0038460 |
| 1746577944 | 1938 | 1938 | Crashing Hollywood                | Crashing Hollywood                | Landers, Lew                         | Lew Landers            | tt0030022 |
| 1746486187 | 1918 | 1918 | A Pair of Silk Stockings          | A Pair of Silk Stockings          | Edwards, Walter                      | Walter Edwards         | tt0009475 |
| 1746491806 | 1946 | 1946 | Shadow of a Woman                 | Shadow of a Woman                 | Santley, Joseph                      | Joseph Santley         | tt0038927 |
| 1746515824 | 1920 | 1920 | Occasionally Yours                | Occasionally Yours                | Horne, James W.                      | James W. Horne         | tt0196807 |
| 1746410548 | 1990 | 1990 | State of Grace                    | State of Grace                    | Joanou, Phil                         | Phil Joanou            | tt0100685 |
| 1746418704 | 1940 | 1939 | A Child Is Born                   | A Child Is Born                   | Bacon, Lloyd                         | Lloyd Bacon            | tt0032333 |
| 1745359743 | 2002 | 2002 | Serving Sara                      | Serving Sara                      | Hudlin, Reginald                     | Reginald Hudlin        | tt0261289 |
| 1745357922 | 2003 | 2003 | Capturing the Friedmans           | Capturing the Friedmans           | Jarecki, Andrew                      | Andrew Jarecki         | tt0342172 |
| 1746512747 | 1923 | 1923 | Yesterday's Wife                  | Yesterday's Wife                  | Le Saint, Edward J.                  | Edward LeSaint         | tt0014628 |
| 1746525066 | 1920 | 1920 | Shod with Fire                    | Shod with Fire                    | Flynn, Emmett J.                     | Emmett J. Flynn        | tt0011688 |
| 1746467859 | 1917 | 1917 | The Mad Lover                     | The Mad Lover                     | Perret, Léonce                       | Léonce Perret          | tt0008239 |
| 1746569775 | 1954 | 1954 | Alaska Seas                       | Alaska Seas                       | Hopper, Jerry                        | Jerry Hopper           | tt0046692 |
| 1746524205 | 1917 | 1917 | The Candy Girl                    | The Candy Girl                    | Moore, W. Eugene                     | Eugene Moore           | tt0168565 |
| 1746524807 | 1923 | 1923 | The Broad Road                    | The Broad Road                    | Mortimer, Edmund                     | Edmund Mortimer        | tt0013893 |
| 1746422628 | 1993 | 1993 | The Crush                         | The Crush                         | Shapiro, Alan                        | Alan Shapiro           | tt0106627 |
| 1746520152 | 1926 | 1926 | The Midnight Sun                  | The Midnight Sun                  | Buchowetski, Dimitri                 | Dimitri Buchowetzki    | tt0017144 |
| 1745293245 | 2006 | 2005 | Edmond                            | Edmond                            | Gordon, Stuart                       | Stuart Gordon          | tt0443496 |
| 1746580586 | 1937 | 1937 | Wallaby Jim of the Islands        | Wallaby Jim of the Islands        | Lamont, Charles                      | Charles Lamont         | tt0029745 |
| 1746219207 | 1972 | 1972 | Joe Kidd                          | Joe Kidd                          | Sturges, John                        | John Sturges           | tt0068768 |
| 1746436367 | 1941 | 1940 | Michael Shayne, Private Detective | Michael Shayne: Private Detective | Forde, Eugene                        | Eugene Forde           | tt0032788 |
| 1746410012 | 1992 | 1992 | The Babe                          | The Babe                          | Hiller, Arthur                       | Arthur Hiller          | tt0103747 |
| 1746583195 | 1930 | 1930 | Bride of the Regiment             | Bride of the Regiment             | Dillon, John Francis                 | John Francis Dillon    | tt0020712 |
| 1746508155 | 1949 | 1949 | Trails End                        | Trails End                        | Hillyer, Lambert                     | Lambert Hillyer        | tt0122288 |

|            |      |      |                               |                               |                                  |                      |           |
|------------|------|------|-------------------------------|-------------------------------|----------------------------------|----------------------|-----------|
| 1745282633 | 2006 | 2005 | Commune                       | Commune                       | Berman, Jonathan                 | Jonathan Berman      | tt0439511 |
| 1746584039 | 1935 | 1935 | Here Comes Cookie             | Here Comes Cookie             | McLeod, Norman                   | Norman Z. McLeod     | tt0026465 |
| 1746574199 | 1960 | 1960 | Exodus                        | Exodus                        | Preminger, Otto                  | Otto Preminger       | tt0053804 |
| 1746248848 | 1980 | 1980 | Carny                         | Carny                         | Kaylor, Robert                   | Robert Kaylor        | tt0080500 |
| 1746270417 | 1978 | 1978 | Magic                         | Magic                         | Attenborough, Richard            | Richard Attenborough | tt0077889 |
| 1746567111 | 1952 | 1952 | Just Across the Street        | Just Across the Street        | Pevney, Joseph                   | Joseph Pevney        | tt0044780 |
| 1746577642 | 1935 | 1935 | After the Dance               | After the Dance               | Bulgakov, Leo                    | Leo Bulgakov         | tt0026044 |
| 1746394005 | 1985 | 1985 | Barbarian Queen               | Barbarian Queen               | Olivera, Héctor                  | Héctor Olivera       | tt0088771 |
| 1746493535 | 1910 | 1910 | What the Daisy Said           | What the Daisy Said           | Griffith, D. W.                  | D.W. Griffith        | tt0001452 |
| 1746464835 | 1941 | 1941 | Pals of the Pecos             | Pals of the Pecos             | Orlebeck, Les                    | Lester Orlebeck      | tt0033995 |
| 1746500242 | 1924 | 1924 | The Breed of the Border       | Breed of the Border           | Garson, Harry                    | Harry Garson         | tt0014741 |
| 1746456079 | 1997 | 1997 | Gone Fishin'                  | Gone Fishin'                  | Cain, Christopher                | Christopher Cain     | tt0119214 |
| 1746393660 | 1988 | 1988 | Colors                        | Colors                        | Hopper, Dennis                   | Dennis Hopper        | tt0094894 |
| 1746570438 | 1934 | 1933 | Twin Husbands                 | Twin Husbands                 | Strayer, Frank R.                | Frank R. Strayer     | tt0025921 |
| 1746493616 | 1912 | 1912 | Cleopatra                     | Cleopatra                     | Gaskill, Charles L.              | Charles L. Gaskill   | tt0002101 |
| 1746532814 | 1916 | 1916 | The Crippled Hand             | The Crippled Hand             | Leonard, Robert; Kirkland, David | David Kirkland       | tt0006556 |
| 1746453927 | 1997 | 1997 | Vegas Vacation                | Vegas Vacation                | Kessler, Stephen                 | Stephen Kessler      | tt0120434 |
| 1746569757 | 1954 | 1954 | Betrayed                      | Betrayed                      | Reinhardt, Gottfried             | Gottfried Reinhardt  | tt0046770 |
| 1746574618 | 1935 | 1935 | Confidential                  | Confidential                  | Cahn, Edward L.                  | Edward L. Cahn       | tt0026231 |
| 1746573565 | 1932 | 1932 | The Phantom President         | The Phantom President         | Taurog, Norman                   | Norman Taurog        | tt0023334 |
| 1746569614 | 1953 | 1953 | Tumbleweed                    | Tumbleweed                    | Juran, Nathan                    | Nathan Juran         | tt0046469 |
| 1746483490 | 1917 | 1917 | Her Secret                    | Her Secret                    | Vekroff, Perry N.                | Perry N. Vekroff     | tt0175727 |
| 1769970616 | 1968 | 1968 | Key Club Wives                | Key Club Wives                | Clay, Adam                       | Adam Clay            | tt0222106 |
| 1746581833 | 1928 | 1928 | Taxi 13                       | Taxi 13                       | Neilan, Marshall                 | Marshall Neilan      | tt0019448 |
| 1746500405 | 1925 | 1925 | The Business of Love          | The Business of Love          | Robbins, Jesse                   | Irving Reis          | tt0015655 |
| 1746570884 | 1933 | 1933 | Good-bye Love                 | Goodbye Love                  | Humberstone, H. Bruce            | H. Bruce Humberstone | tt0025194 |
| 1746392855 | 1985 | 1985 | The Breakfast Club            | The Breakfast Club            | Hughes, John                     | John Hughes          | tt0088847 |
| 1746524830 | 1923 | 1923 | Your Friend and Mine          | Your Friend and Mine          | Badger, Clarence G.              | Clarence G. Badger   | tt0014633 |
| 1746570856 | 1934 | 1934 | Fugitive Lovers               | Fugitive Lovers               | Boleslavsky, Richard             | Richard Boleslawski  | tt0025151 |
| 1746496422 | 1918 | 1918 | Berlin Via America            | Berlin Via America            | Ford, Francis                    | Francis Ford         | tt0182783 |
| 1746554318 | 1963 | 1963 | Bye Bye Birdie                | Bye Bye Birdie                | Sidney, George                   | George Sidney        | tt0056891 |
| 1746562193 | 1956 | 1956 | Calling Homicide              | Calling Homicide              | Bernds, Edward                   | Edward Bernds        | tt0049044 |
| 1746423461 | 1991 | 1991 | Shattered                     | Shattered                     | Petersen, Wolfgang               | Wolfgang Petersen    | tt0102900 |
| 1746570571 | 1934 | 1934 | I Can't Escape                | I Can't Escape                | Brower, Otto                     | Otto Brower          | tt0165322 |
| 1746454477 | 1942 | 1942 | The Great Man's Lady          | The Great Man's Lady          | Wellman, William A.              | William A. Wellman   | tt0034812 |
| 1746524794 | 1917 | 1917 | The Bondage of Fear           | The Bondage of Fear           | Vale, Travers                    | Travers Vale         | tt0168531 |
| 1746513629 | 1916 | 1916 | Feathertop                    | Feathertop                    | Vernot, Henry                    | Henry J. Vernot      | tt0157623 |
| 1746186340 | 1967 | 1966 | Chappaqua                     | Chappaqua                     | Rooks, Conrad                    | Conrad Rooks         | tt0059025 |
| 1746409126 | 1988 | 1988 | Willow                        | Willow                        | Howard, Ron                      | Ron Howard           | tt0096446 |
| 1746216725 | 1968 | 1968 | Maryjane                      | Maryjane                      | Dexter, Maury                    | Maury Dexter         | tt0063281 |
| 1746423262 | 1997 | 1997 | The Devil's Advocate          | The Devil's Advocate          | Hackford, Taylor                 | Taylor Hackford      | tt0118971 |
| 1746577609 | 1938 | 1938 | Brother Rat                   | Brother Rat                   | Keighley, William                | William Keighley     | tt0029949 |
| 1746420529 | 1994 | 1994 | Beverly Hills Cop III         | Beverly Hills Cop III         | Landis, John                     | John Landis          | tt0109254 |
| 1746218819 | 1973 | 1973 | Black Mama, White Mama        | Black Mama White Mama         | Romero, Eddie                    | Eddie Romero         | tt0068282 |
| 1746569985 | 1958 | 1958 | The Restless Years            | The Restless Years            | Kautner, Helmut                  | Helmut Käutner       | tt0052129 |
| 1746560730 | 1932 | 1932 | Manhattan Tower               | Manhattan Tower               | Strayer, Frank                   | Frank R. Strayer     | tt0023187 |
| 1746474944 | 1945 | 1945 | Thrill of a Romance           | Thrill of a Romance           | Thorpe, Richard                  | Richard Thorpe       | tt0038170 |
| 1746563846 | 1953 | 1953 | The Beast from 20,000 Fathoms | The Beast from 20,000 Fathoms | Lourié, Eugene                   | Eugène Lourié        | tt0045546 |
| 1746499906 | 1923 | 1923 | The Go-Getter                 | The Go Getter                 | Griffith, E. H.                  | Edward H. Griffith   | tt0014087 |
| 1746582757 | 1935 | 1935 | The Irish in Us               | The Irish in Us               | Bacon, Lloyd                     | Lloyd Bacon          | tt0026534 |
| 1746585352 | 1930 | 1930 | Near the Rainbow's End        | Near the Rainbow's End        | McGowan, J. P.                   | J.P. McGowan         | tt0021176 |
| 1746424428 | 1941 | 1941 | The Devil Commands            | The Devil Commands            | Dmytryk, Edward                  | Edward Dmytryk       | tt0033530 |
| 1746420952 | 1940 | 1940 | The Man Who Talked Too Much   | The Man Who Talked Too Much   | Sherman, Vincent                 | Vincent Sherman      | tt0032747 |
| 1746218758 | 1974 | 1974 | Thunderbolt and Lightfoot     | Thunderbolt and Lightfoot     | Cimino, Michael                  | Michael Cimino       | tt0072288 |
| 1746569857 | 1957 | 1957 | Undersea Girl                 | Undersea Girl                 | Peyser, John                     | John Peyser          | tt0051131 |
| 1746574841 | 1933 | 1933 | Above the Clouds              | Above the Clouds              | Neill, Roy William               | Roy William Neill    | tt0024811 |
| 1746497891 | 1922 | 1922 | Shattered Dreams              | Shattered Dreams              | Scardon, Paul                    | Paul Scardon         | tt0013594 |

|                   |             |             |                                   |                                   |                           |                          |                  |
|-------------------|-------------|-------------|-----------------------------------|-----------------------------------|---------------------------|--------------------------|------------------|
| 1746496045        | 1918        | 1918        | The Legion of Death               | The Legion of Death               | Browning, Tod             | Tod Browning             | tt0009284        |
| 1746503729        | 1921        | 1921        | The Last Door                     | The Last Door                     | Earle, William P. S.      | William P.S. Earle       | tt0012378        |
| 1746570324        | 1934        | 1934        | Sweet Adeline                     | Sweet Adeline                     | Le Roy, Mervyn            | Mervyn LeRoy             | tt0025850        |
| 1746393179        | 1986        | 1985        | Pray for Death                    | Pray for Death                    | Hessler, Gordon           | Gordon Hessler           | tt0089835        |
| 1746421709        | 1999        | 1999        | Wild Wild West                    | Wild Wild West                    | Sonnenfeld, Barry         | Barry Sonnenfeld         | tt0120891        |
| 1746523694        | 1916        | 1916        | The Ne'er-Do-Well                 | The Ne'er Do Well                 | Campbell, Colin           | Colin Campbell           | tt0007117        |
| 1746422270        | 1999        | 1999        | Mystery Men                       | Mystery Men                       | Usher, Kinka              | Kinka Usher              | tt0132347        |
| 1746562435        | 1957        | 1957        | The Invisible Boy                 | The Invisible Boy                 | Hoffman, Herman           | Herman Hoffman           | tt0050546        |
| 1746491749        | 1947        | 1947        | The Sea of Grass                  | The Sea of Grass                  | Kazan, Elia               | Elia Kazan               | tt0039806        |
| 1745293368        | 2007        | 2007        | The Darjeeling Limited            | The Darjeeling Limited            | Anderson, Wes             | Wes Anderson             | tt0838221        |
| 1746574759        | 1937        | 1937        | Man of the People                 | Man of the People                 | Marin, Edwin L.           | Edwin L. Marin           | tt0029206        |
| 1746500349        | 1924        | 1924        | Floodgates                        | Floodgates                        | Irving, George            | George Irving            | tt0014913        |
| 1746423743        | 1992        | 1992        | We're Talkin' Serious Money       | We're Talkin' Serious Money       | Lemmo, James              | James Lemmo              | tt0108528        |
| 1746578393        | 1959        | 1959        | Date with Death                   | Date with Death                   | Daniels, Harold           | Harold Daniels           | tt0124336        |
| 1746473930        | 1947        | 1947        | Road to the Big House             | Road to the Big House             | Colmes, Walter            | Walter Colmes            | tt0039777        |
| 1746582002        | 1929        | 1929        | Outlawed                          | Outlawed                          | Forde, Eugene             | Eugene Forde             | tt0020249        |
| 1746498347        | 1920        | 1920        | In Folly's Trail                  | In Folly's Trail                  | Sturgeon, Rollin          | Rollin S. Sturgeon       | tt0011328        |
| 1746186223        | 1968        | 1968        | Sol Madrid                        | Sol Madrid                        | Hutton, Brian G.          | Brian G. Hutton          | tt0063621        |
| 1746503272        | 1919        | 1919        | A White Man's Chance              | A White Man's Chance              | Warde, Ernest C.          | Ernest C. Warde          | tt0194536        |
| 1746532643        | 1916        | 1916        | Divorce and the Daughter          | Divorce and the Daughter          | Sullivan, Frederick       | Frederick Sullivan       | tt0157543        |
| 1746574733        | 1937        | 1937        | Wings over Honolulu               | Wings Over Honolulu               | Potter, H. C.             | H.C. Potter              | tt0029784        |
| 1746566049        | 1957        | 1957        | Kiss Them for Me                  | Kiss Them for Me                  | Donen, Stanley            | Stanley Donen            | tt0050599        |
| 1746575787        | 1931        | 1931        | Command Performance               | Command Performance               | Lang, Walter              | Walter Lang              | tt0020780        |
| 1746520869        | 1925        | 1925        | Savages of the Sea                | Savages of the Sea                | Mitchell, Bruce           | Bruce Mitchell           | tt0016314        |
| 1746515678        | 1920        | 1920        | Crooked Streets                   | Crooked Streets                   | Powell, Paul              | Paul Powell              | tt0011079        |
| 1746581130        | 1960        | 1960        | I Passed for White                | I Passed for White                | Wilcox, Fred M.           | Fred M. Wilcox           | tt0053933        |
| 1746433573        | 1995        | 1995        | Party Girl                        | Party Girl                        | Mayer, Daisy von Scherler | Daisy von Scherler Mayer | tt0114095        |
| 1746508451        | 1925        | 1925        | Winning a Woman                   | Winning a Woman                   |                           | Harry S. Webb            | tt0180307        |
| 1746508238        | 1949        | 1949        | The Sun Comes Up                  | The Sun Comes Up                  | Thorpe, Richard           | Richard Thorpe           | tt0040849        |
| 1746392747        | 1985        | 1985        | Perfect                           | Perfect                           | Bridges, James            | James Bridges            | tt0089798        |
| <b>1746474110</b> | <b>1946</b> | <b>1946</b> | <b>Of Human Bondage</b>           | <b>Of Human Bondage</b>           | <b>Goulding, Edmund</b>   | <b>Edmund Goulding</b>   | <b>tt0038795</b> |
| 1746464813        | 1941        | 1941        | A Girl, a Guy and a Gob           | A Girl, a Guy and a Gob           | Wallace, Richard          | Richard Wallace          | tt0033664        |
| 1746454643        | 1946        | 1946        | Behind the Mask                   | Behind the Mask                   | Karlson, Phil             | Phil Karlson             | tt0038347        |
| 1746497884        | 1921        | 1921        | His Nibs                          | His Nibs                          | La Cava, Gregory          | Gregory La Cava          | tt0012284        |
| 1746582578        | 1938        | 1938        | Young Dr. Kildare                 | Young Dr. Kildare                 | Bucquet, Harold S.        | Harold S. Bucquet        | tt0031000        |
| 1746464977        | 1941        | 1940        | The Philadelphia Story            | The Philadelphia Story            | Cukor, George             | George Cukor             | tt0032904        |
| 1746545237        | 1940        | 1940        | Star Dust                         | Star Dust                         | Lang, Walter              | Walter Lang              | tt0033100        |
| 1746501893        | 1916        | 1916        | A Huntress of Men                 | The Huntress of Men               | Henderson, Lucius         | Lucius Henderson         | tt0006837        |
| 1746570984        | 1933        | 1933        | The Whirlwind                     | The Whirlwind                     | Lederman, D. Ross         | D. Ross Lederman         | tt0024767        |
| 1746582963        | 1936        | 1936        | Captain Calamity                  | Captain Calamity                  | Reinhardt, John           | John Reinhardt           | tt0027420        |
| 1746582128        | 1929        | 1930        | Fighting Cowboy                   | Fighting Cowboy                   |                           |                          | tt0325373        |
| 1746258713        | 1980        | 1980        | Schizoid                          | Schizoid                          | Paulsen, David            | David Paulsen            | tt0081459        |
| 1745395387        | 2010        | 2009        | Today's Special                   | Today's Special                   | Kaplan, David             | David Kaplan             | tt1153053        |
| 1746561341        | 1957        | 1957        | The Disembodied                   | The Disembodied                   | Grauman, Walter           | Walter Grauman           | tt0050317        |
| 1746514289        | 1922        | 1922        | The Crossroads of New York        | The Crossroads of New York        | Jones, F. Richard         | F. Richard Jones         | tt0013038        |
| 1746198101        | 1968        | 1968        | What's So Bad About Feeling Good? | What's So Bad About Feeling Good? | Seaton, George            | George Seaton            | tt0063799        |
| 1746394519        | 1985        | 1985        | The Journey of Natty Gann         | The Journey of Natty Gann         | Kagan, Jeremy             | Jeremy Kagan             | tt0089385        |
| 1746507878        | 1923        | 1923        | The Hero                          | The Hero                          | Gasnier, Louis J.         | Louis J. Gasnier         | tt0014132        |
| 1746507821        | 1927        | 1927        | The Nest                          | The Nest                          | Nigh, William             | William Nigh             | tt0018198        |
| 1746439179        | 1999        | 1999        | Angela's Ashes                    | Angela's Ashes                    | Parker, Alan              | Alan Parker              | tt0145653        |
| 1746491804        | 1946        | 1946        | Partners in Time                  | Partners in Time                  | Nigh, William             | William Nigh             | tt0038827        |
| 1746567426        | 1933        | 1933        | Berkeley Square                   | Berkeley Square                   | Lloyd, Frank              | Frank Lloyd              | tt0023794        |
| 1746563790        | 1951        | 1951        | The Steel Helmet                  | The Steel Helmet                  | Fuller, Samuel            | Samuel Fuller            | tt0044072        |
| 1745282720        | 2006        | 2006        | Charlotte's Web                   | Charlotte's Web                   | Winick, Gary              | Gary Winick              | tt0413895        |
| 1746582977        | 1936        | 1936        | Under Your Spell                  | Under Your Spell                  | Preminger, Otto Ludwig    | Otto Preminger           | tt0028443        |
| 1746585167        | 1929        | 1929        | Linda                             | Linda                             | Reid, Wallace             | Dorothy Davenport        | tt0020099        |
| 1746408880        | 1990        | 1990        | Eating                            | Eating                            | Jaglom, Henry             | Henry Jaglom             | tt0099480        |

|            |      |      |                           |                           |                                  |                      |           |
|------------|------|------|---------------------------|---------------------------|----------------------------------|----------------------|-----------|
| 1746577338 | 1962 | 1962 | Sergeants 3               | Sergeants 3               | Sturges, John                    | John Sturges         | tt0056470 |
| 1746495582 | 1917 | 1917 | The Corner Grocer         | The Corner Grocer         | Cowl, George                     | George Cowl          | tt0007821 |
| 1746235028 | 1971 | 1971 | Chandler                  | Chandler                  | Magwood, Paul                    | Paul Magwood         | tt0068356 |
| 1746435705 | 1943 | 1943 | Deerslayer                | The Deerslayer            | Landers, Lew                     | Lew Landers          | tt0035791 |
| 1746569717 | 1956 | 1956 | The Man Who Never Was     | The Man Who Never Was     | Neame, Ronald                    | Ronald Neame         | tt0049471 |
| 1746514068 | 1916 | 1916 | The Social Secretary      | The Social Secretary      | Emerson, John                    | John Emerson         | tt0007367 |
| 1746508235 | 1924 | 1924 | The Pell Street Mystery   | The Pell Street Mystery   | Franz, Joseph                    | Joseph Franz         | tt0148593 |
| 1746393388 | 1989 | 1989 | Bert Rigby, You're a Fool | Bert Rigby, You're a Fool | Reiner, Carl                     | Carl Reiner          | tt0096911 |
| 1746500704 | 1924 | 1924 | Not Built for Runnin'     | Not Built for Runnin'     | Maloney, Leo                     | Leo D. Maloney       | tt0142702 |
| 1746486294 | 1917 | 1917 | The Beautiful Lie         | The Beautiful Lie         | Noble, John W.                   | John W. Noble        | tt0167033 |
| 1746453563 | 1941 | 1941 | The Saint's Vacation      | The Saint's Vacation      | Fenton, Leslie                   | Leslie Fenton        | tt0034146 |
| 1769970588 | 1966 | 1966 | The Girl From S.I.N.      | The Girl from S.I.N.      | Smith, C. Davis                  | C. Davis Smith       | tt0196588 |
| 1746581773 | 1928 | 1928 | The Sky Rider             | The Sky Rider             | Neitz, Alvin J.                  | Alan James           | tt0019396 |
| 1746583290 | 1929 | 1929 | New York Nights           | New York Nights           | Milestone, Lewis                 | Lewis Milestone      | tt0020217 |
| 1746419593 | 1981 | 1980 | Blood Beach               | Blood Beach               | Bloom, Jeffrey                   | Jeffrey Bloom        | tt0082083 |
| 1746513072 | 1910 | 1910 | Simpson's Skate           | Simpson's Skate           |                                  |                      | tt1717684 |
| 1746454378 | 1946 | 1946 | Canyon Passage            | Canyon Passage            | Tourneur, Jacques                | Jacques Tourneur     | tt0038395 |
| 1746514873 | 1916 | 1916 | A Modern Paul             | A Modern Paul             | Mayo, Melvin                     | Melvin Mayo          | tt0817221 |
| 1746423778 | 1940 | 1940 | Castle on the Hudson      | Castle on the Hudson      | Litvak, Anatole                  | Anatole Litvak       | tt0032315 |
| 1746501220 | 1916 | 1916 | Peggy                     | Peggy                     | Ince, Thomas H.; Giblyn, Charles | Charles Giblyn       | tt0007167 |
| 1746497546 | 1918 | 1918 | Wild Honey                | Wild Honey                | Grandon, Francis J.              | Francis J. Grandon   | tt0190142 |
| 1746233298 | 1966 | 1966 | That Tennessee Beat       | That Tennessee Beat       | Brill, Richard                   | Richard Brill        | tt0232791 |
| 1746582189 | 1928 | 1928 | Phyllis of the Follies    | Phyllis of the Follies    | Laemmle, Ernst                   | Ernst Laemmle        | tt0019272 |
| 1746583565 | 1950 | 1950 | Once a Thief              | Once a Thief              | Wilder, W. Lee                   | W. Lee Wilder        | tt0042807 |
| 1769971956 | 1969 | 1969 | The Stud Farm             | The Stud Farm             | Zacha, Jac                       | Jac Zacha            | tt0065044 |
| 1746408426 | 1990 | 1990 | Avalon                    | Avalon                    | Levinson, Barry                  | Barry Levinson       | tt0099073 |
| 1746520531 | 1927 | 1926 | Oh, Baby                  | Oh, Baby!                 | Knoles, Harley                   | Harley Knoles        | tt0017224 |
| 1746467158 | 1917 | 1917 | Chicken Casey             | Chicken Casey             | West, Raymond B.                 | Raymond B. West      | tt0168577 |
| 1769974349 | 1916 | 1916 | Jerry's Double Header     | Jerry's Double Header     | Fahrney, Milton                  | Milton J. Fahrney    | tt0484681 |
| 1746530676 | 1949 | 1949 | Everybody Does It         | Everybody Does It         | Goulding, Edmund                 | Edmund Goulding      | tt0041341 |
| 1745372652 | 2003 | 2003 | Seabiscuit                | Seabiscuit                | Ross, Gary                       | Gary Ross            | tt0329575 |
| 1746524933 | 1923 | 1923 | Puritan Passions          | Puritan Passions          | Tuttle, Frank                    | Frank Tuttle         | tt0014382 |
| 1746473732 | 1942 | 1942 | 'Neath Brooklyn Bridge    | 'Neath Brooklyn Bridge    | Fox, Wallace                     | Wallace Fox          | tt0034420 |
| 1745342676 | 2002 | 2002 | The Transporter           | The Transporter           | Yuen, Cory                       | Louis Leterrier      | tt0293662 |
| 1745293311 | 2006 | 2006 | ATL                       | ATL                       | Robinson, Chris                  | Chris Robinson       | tt0466856 |
| 1746409360 | 1982 | 1982 | Six Pack                  | Six Pack                  | Petrie, Daniel                   | Daniel Petrie        | tt0084690 |
| 1745293983 | 2005 | 2005 | The Squid and the Whale   | The Squid and the Whale   | Baumbach, Noah                   | Noah Baumbach        | tt0367089 |
| 1746572434 | 1931 | 1931 | City Streets              | City Streets              | Mamoulian, Rouben                | Rouben Mamoulian     | tt0021750 |
| 1746508604 | 1924 | 1924 | The Hellion               | The Hellion               | Mitchell, Bruce                  | Bruce Mitchell       | tt0014979 |
| 1746580553 | 1935 | 1935 | Love Me Forever           | Love Me Forever           | Schertzing, Victor               | Victor Schertzing    | tt0026654 |
| 1746501302 | 1910 | 1910 | Winning Back His Love     | Winning Back His Love     | Griffith, D. W.                  | D.W. Griffith        | tt0001459 |
| 1746574292 | 1958 | 1958 | Suicide Battalion         | Suicide Battalion         | Cahn, Edward L.                  | Edward L. Cahn       | tt0052257 |
| 1746492752 | 1946 | 1946 | O.S.S.                    | O.S.S.                    | Pichel, Irving                   | Irving Pichel        | tt0038794 |
| 1746574566 | 1937 | 1937 | Outlaws of the Orient     | Outlaws of the Orient     | Schoedsack, Ernest B.            | Ernest B. Schoedsack | tt0029363 |
| 1746574837 | 1935 | 1935 | The Nitwits               | The Nitwits               | Stevens, George                  | George Stevens       | tt0026781 |
| 1746573828 | 1960 | 1960 | Song Without End          | Song Without End          | Vidor, Charles; Cukor, George    | Charles Vidor        | tt0054324 |
| 1746577847 | 1939 | 1939 | Days of Jesse James       | Days of Jesse James       | Kane, Joseph                     | Joseph Kane          | tt0031216 |
| 1745358528 | 2010 | 2010 | My Soul to Take           | My Soul to Take           | Craven, Wes                      | Wes Craven           | tt0872230 |
| 1746570384 | 1934 | 1934 | The Girl from Missouri    | The Girl from Missouri    | Conway, Jack; Wood, Sam          | Jack Conway          | tt0025173 |
| 1746453524 | 1943 | 1943 | The Ghost Ship            | The Ghost Ship            | Robson, Mark                     | Mark Robson          | tt0035937 |
| 1746208393 | 1967 | 1967 | The Flim-Flam Man         | The Flim Flam Man         | Kershner, Irvin                  | Irvin Kershner       | tt0061678 |
| 1746530679 | 1949 | 1949 | Across the Rio Grande     | Across the Rio Grande     | Drake, Oliver                    | Oliver Drake         | tt0041087 |
| 1746494169 | 1910 | 1910 | The Taming of Wild Bill   | The Taming of Wild Bill   |                                  |                      | tt1816694 |
| 1746555881 | 1957 | 1957 | The Amazing Colossal Man  | The Amazing Colossal Man  | Gordon, Bert I.                  | Bert I. Gordon       | tt0050118 |
| 1746497564 | 1921 | 1921 | Wet Gold                  | Wet Gold                  | Ince, Ralph                      | Ralph Ince           | tt0012826 |
| 1746453605 | 1941 | 1941 | Bad Man of Deadwood       | Bad Man of Deadwood       | Kane, Joseph                     | Joseph Kane          | tt0033367 |
| 1769969354 | 1964 | 1963 | Six Shes and a He         | Six She's and a He        |                                  | Richard S. Flink     | tt0304355 |

|            |      |      |                                 |                                 |                        |                        |            |
|------------|------|------|---------------------------------|---------------------------------|------------------------|------------------------|------------|
| 1746553966 | 1964 | 1964 | Two Thousand Maniacs!           | Two Thousand Maniacs!           | Lewis, Herschell G.    | Herschell Gordon Lewis | tt0058694  |
| 1746560638 | 1965 | 1965 | Harlow                          | Harlow                          | Segal, Alex            | Gordon Douglas         | tt0059252  |
| 1746577278 | 1961 | 1961 | Susan Slade                     | Susan Slade                     | Daves, Delmer          | Delmer Daves           | tt0055490  |
| 1746578996 | 1961 | 1961 | Tammy Tell Me True              | Tammy Tell Me True              | Keller, Harry          | Harry Keller           | tt0055503  |
| 1746496508 | 1919 | 1919 | The Darkest Hour                | The Darkest Hour                | Scardon, Paul          | Paul Scardon           | tt0190350  |
| 1746219640 | 1976 | 1976 | All the President's Men         | All the President's Men         | Pakula, Alan J.        | Alan J. Pakula         | tt0074119  |
| 1746474135 | 1948 | 1948 | Racing Luck                     | Racing Luck                     | Berke, William         | William Berke          | tt0126630  |
| 1746409303 | 1989 | 1989 | Mutant on the Bounty            | Mutant on the Bounty            | Torrance, Robert       | Robert Torrance        | tt0097934  |
| 1746524539 | 1915 | 1915 | Are You a Mason?                | Are You a Mason?                | Heffron, Thomas N.     | Thomas N. Heffron      | tt0004907  |
| 1746583287 | 1931 | 1931 | Lonely Wives                    | Lonely Wives                    | Mack, Russell          | Russell Mack           | tt0022086  |
| 1746565038 | 1953 | 1952 | Botany Bay                      | Botany Bay                      | Farrow, John           | John Farrow            | tt0045574  |
| 1746508024 | 1927 | 1927 | The Mojave Kid                  | The Mojave Kid                  | Bradbury, Robert North | Robert N. Bradbury     | tt0018169  |
| 1746582126 | 1930 | 1930 | Isle of Escape                  | Isle of Escape                  | Bretherton, Howard     | Howard Bretherton      | tt0021003  |
| 1746500473 | 1949 | 1949 | Leave It to Henry               | Leave It to Henry               | Yarbrough, Jean        | Jean Yarbrough         | tt0041586  |
| 1746421288 | 1999 | 1999 | Splendor                        | Splendor                        | Araki, Gregg           | Gregg Araki            | tt0127296  |
| 1746569866 | 1956 | 1956 | The Man Is Armed                | The Man Is Armed                | Adreon, Franklin       | Franklin Adreon        | tt0049469  |
| 1745341231 | 2008 | 2007 | My Name Is Bruce                | My Name Is Bruce                | Campbell, Bruce        | Bruce Campbell         | tt00489235 |
| 1746393994 | 1988 | 1988 | Big                             | Big                             | Marshall, Penny        | Penny Marshall         | tt0094737  |
| 1746520847 | 1925 | 1925 | The Human Tornado               | The Human Tornado               | Wilson, Ben            | Ben F. Wilson          | tt0127592  |
| 1746523312 | 1914 | 1914 | The Royal Box                   | The Royal Box                   | Eagle, Oscar           | Oscar Eagle            | tt0004548  |
| 1746582748 | 1936 | 1936 | Fugitive in the Sky             | Fugitive in the Sky             | Grinde, Nick           | Nick Grinde            | tt0028907  |
| 1746520424 | 1925 | 1925 | The Lucky Devil                 | The Lucky Devil                 | Tuttle, Frank          | Frank Tuttle           | tt0016051  |
| 1746570587 | 1933 | 1933 | Devil's Mate                    | The Devil's Mate                | Rosen, Phil            | Phil Rosen             | tt0023944  |
| 1746573941 | 1959 | 1959 | Jet over the Atlantic           | Jet Over the Atlantic           | Haskin, Byron          | Byron Haskin           | tt0052943  |
| 1746515772 | 1917 | 1917 | The Understudy                  | The Understudy                  | Bertram, William       | William Bertram        | tt0183945  |
| 1746465025 | 1946 | 1946 | The Undercover Woman            | The Undercover Woman            | Carr, Thomas           | Thomas Carr            | tt0039065  |
| 1746585447 | 1939 | 1939 | Boy Slaves                      | Boy Slaves                      | Wolfson, P. J.         | P.J. Wolfson           | tt0031117  |
| 1746571797 | 1931 | 1931 | The Right of Way                | The Right of Way                | Lloyd, Frank           | Frank Lloyd            | tt0022317  |
| 1746498287 | 1918 | 1918 | Suspicion                       | Suspicion                       | Stahl, John M.         | John M. Stahl          | tt0009674  |
| 1746553483 | 1965 | 1965 | Camp                            | Camp                            | Warhol, Andy           | Andy Warhol            | tt0173709  |
| 1745282676 | 2007 | 2007 | Because I Said So               | Because I Said So               | Lehmann, Michael       | Michael Lehmann        | tt0490084  |
| 1746485588 | 1917 | 1917 | The Courage of the Common Place | The Courage of the Common Place | Turbett, Ben           | Ben Turbett            | tt0168611  |
| 1746498337 | 1919 | 1919 | The White Heather               | The White Heather               | Tourneur, Maurice      | Maurice Tourneur       | tt0010882  |
| 1746532815 | 1915 | 1915 | The Patriot and the Spy         | The Patriot and the Spy         |                        | Jack Harvey            | tt0005874  |
| 1746530773 | 1948 | 1948 | Three Daring Daughters          | Three Daring Daughters          | Wilcox, Fred M.        | Fred M. Wilcox         | tt0040875  |
| 1746524068 | 1923 | 1923 | The Lonely Road                 | The Lonely Road                 | Schertzinger, Victor   | Victor Schertzinger    | tt0014210  |
| 1746520957 | 1949 | 1949 | The Secret of St. Ives          | The Secret of St. Ives          | Rosen, Philip          | Phil Rosen             | tt0041856  |
| 1746410700 | 1993 | 1993 | Only the Strong                 | Only the Strong                 | Lettich, Sheldon       | Sheldon Lettich        | tt0107750  |
| 1746393277 | 1984 | 1984 | The Lonely Guy                  | The Lonely Guy                  | Hiller, Arthur         | Arthur Hiller          | tt0087635  |
| 1746577809 | 1937 | 1937 | One Hundred Men and a Girl      | One Hundred Men and a Girl      | Koster, Henry          | Henry Koster           | tt0029347  |
| 1746475293 | 1947 | 1947 | Jewels of Brandenburg           | Jewels of Brandenburg           | Forde, Eugene          | Eugene Forde           | tt0179249  |
| 1746475712 | 1944 | 1944 | Four Jills in a Jeep            | Four Jills in a Jeep            | Seiter, William A.     | William A. Seiter      | tt0036836  |
| 1746562117 | 1953 | 1953 | Half a Hero                     | Half a Hero                     | Weis, Don              | Don Weis               | tt0045854  |
| 1746581057 | 1960 | 1960 | Hell to Eternity                | Hell to Eternity                | Karlson, Phil          | Phil Karlson           | tt0053901  |
| 1746502712 | 1910 | 1910 | Red Eagle's Love Affair         | Red Eagle's Love Affair         |                        |                        | tt0286913  |
| 1746436634 | 1941 | 1941 | The Round Up                    | The Roundup                     | Selander, Lesley       | Lesley Selander        | tt0034133  |
| 1746507740 | 1924 | 1924 | The Covered Trail               | The Covered Trail               | Nelson, Jack           | Jack Nelson            | tt0014803  |
| 1746492550 | 1947 | 1946 | Fool's Gold                     | Fool's Gold                     | Archainbaud, George    | George Archainbaud     | tt0038532  |
| 1746234607 | 1968 | 1968 | Blackbeard's Ghost              | Blackbeard's Ghost              | Stevenson, Robert      | Robert Stevenson       | tt0062737  |
| 1746509024 | 1924 | 1924 | The Snob                        | The Snob                        | Bell, Monta            | Monta Bell             | tt0015346  |
| 1746424169 | 1943 | 1943 | Bad Men of Thunder Gap          | Bad Men of Thunder Gap          | Herman, Albert         | Albert Herman          | tt0039900  |
| 1745393807 | 2008 | 2008 | You Don't Mess with the Zohan   | You Don't Mess with the Zohan   | Dugan, Dennis          | Dennis Dugan           | tt0960144  |
| 1746513615 | 1922 | 1922 | Flesh and Spirit                | Flesh and Spirit                | Levering, Joseph       | Joseph Levering        | tt0013135  |
| 1746561826 | 1956 | 1956 | The Broken Star                 | The Broken Star                 | Selander, Lesley       | Lesley Selander        | tt0049031  |
| 1746582549 | 1938 | 1938 | Holiday                         | Holiday                         | Cukor, George          | George Cukor           | tt0030241  |
| 1746499885 | 1949 | 1949 | Always Leave Them Laughing      | Always Leave Them Laughing      | Del Ruth, Roy          | Roy Del Ruth           | tt0041115  |
| 1746577408 | 1950 | 1950 | The Outriders                   | The Outriders                   | Rowland, Roy           | Roy Rowland            | tt0042825  |

|            |      |      |                                 |                                 |                                       |                      |           |
|------------|------|------|---------------------------------|---------------------------------|---------------------------------------|----------------------|-----------|
| 1746520808 | 1925 | 1925 | The Unchastened Woman           | The Unchastened Woman           | Young, James                          | James Young          | tt0016469 |
| 1746420136 | 1994 | 1994 | Martin Lawrence: You So Crazy   | Martin Lawrence: You So Crazy   | Schlamme, Thomas                      | Thomas Schlamme      | tt0111804 |
| 1746186174 | 1967 | 1967 | First To Fight                  | First to Fight                  | Nyby, Christian                       | Christian Nyby       | tt0061667 |
| 1746582945 | 1937 | 1937 | Bulldog Drummond Comes Back     | Bulldog Drummond Comes Back     | King, Louis                           | Louis King           | tt0028667 |
| 1746218840 | 1979 | 1979 | Buck Rogers in the 25th Century | Buck Rogers in the 25th Century | Haller, Daniel                        | Daniel Haller        | tt0077278 |
| 1746453510 | 1943 | 1943 | Taxi, Mister                    | Taxi, Mister                    | Neumann, Kurt                         | Kurt Neumann         | tt0036416 |
| 1746438973 | 1944 | 1944 | My Pal Wolf                     | My Pal Wolf                     | Werker, Alfred                        | Alfred L. Werker     | tt0037111 |
| 1746577868 | 1939 | 1939 | Slightly Honorable              | Slightly Honorable              | Garnett, Tay                          | Tay Garnett          | tt0033062 |
| 1746410726 | 1992 | 1992 | Far and Away                    | Far and Away                    | Howard, Ron                           | Ron Howard           | tt0104231 |
| 1746249913 | 1978 | 1978 | California Suite                | California Suite                | Ross, Herbert                         | Herbert Ross         | tt0077289 |
| 1746520458 | 1926 | 1925 | Iron Fist                       | The Iron Fist                   | McGowan, J. P.                        | J.P. McGowan         | tt0327963 |
| 1746410380 | 1983 | 1983 | Staying Alive                   | Staying Alive                   | Stallone, Sylvester                   | Sylvester Stallone   | tt0086361 |
| 1746454086 | 1943 | 1943 | Return of the Rangers           | The Return of the Rangers       | Clifton, Elmer                        | Elmer Clifton        | tt0036305 |
| 1745358544 | 2004 | 2004 | First Daughter                  | First Daughter                  | Whitaker, Forest                      | Forest Whitaker      | tt0361620 |
| 1746421970 | 1997 | 1997 | Sprung                          | Sprung                          | Cundieff, Rusty                       | Rusty Cundieff       | tt0120190 |
| 1746577519 | 1938 | 1938 | I Am a Criminal                 | I Am a Criminal                 | Nigh, William                         | William Nigh         | tt0030253 |
| 1746560548 | 1932 | 1932 | High Pressure                   | High Pressure                   | Le Roy, Mervyn                        | Mervyn LeRoy         | tt0023007 |
| 1746504106 | 1918 | 1918 | Fast Company                    | Fast Company                    | Reynolds, Lynn F.                     | Lynn Reynolds        | tt0009058 |
| 1746234993 | 1971 | 1971 | The American Dreamer            | The American Dreamer            | Schiller, Lawrence; Carson, L. M. Kit | L.M. Kit Carson      | tt0177516 |
| 1745373325 | 2002 | 2001 | Human Nature                    | Human Nature                    | Gondry, Michel                        | Michel Gondry        | tt0219822 |
| 1746524454 | 1915 | 1915 | After Dark                      | After Dark                      | Thomson, Frederic                     | Frederick A. Thomson | tt0004865 |
| 1746496244 | 1921 | 1921 | Ladies Must Live                | Ladies Must Live                | Tucker, George Loane                  | George Loane Tucker  | tt0012366 |
| 1746583439 | 1951 | 1951 | Bedtime For Bonzo               | Bedtime for Bonzo               | Cordova, Frederick de                 | Frederick De Cordova | tt0043325 |
| 1746566249 | 1956 | 1956 | The Maverick Queen              | The Maverick Queen              | Kane, Joe                             | Joseph Kane          | tt0049487 |
| 1746512907 | 1917 | 1917 | Charity Castle                  | Charity Castle                  | Ingraham, Lloyd                       | Lloyd Ingraham       | tt0007783 |
| 1746525090 | 1920 | 1920 | Her First Elopement             | Her First Elopement             | Wood, Sam                             | Sam Wood             | tt0011285 |
| 1746216732 | 1969 | 1969 | Smith!                          | Smith!                          | O'Herlihy, Michael                    | Michael O'Herlihy    | tt0065003 |
| 1746577819 | 1936 | 1936 | Tarzan Escapes                  | Tarzan Escapes                  | Thorpe, Richard; Farrow, John; Seitz  | Richard Thorpe       | tt0028345 |
| 1746508763 | 1927 | 1927 | Spuds                           | Spuds                           | Semon, Larry                          | Edward Ludwig        | tt0166363 |
| 1746577618 | 1934 | 1934 | It's a Gift                     | It's a Gift                     | McLeod, Norman                        | Norman Z. McLeod     | tt0025318 |
| 1746581784 | 1950 | 1950 | Sideshow                        | Sideshow                        | Yarbrough, Jean                       | Jean Yarbrough       | tt0042961 |
| 1746508056 | 1925 | 1925 | The Spaniard                    | The Spaniard                    | Walsh, Raoul                          | Raoul Walsh          | tt0016379 |
| 1746580859 | 1938 | 1938 | West of Rainbow's End           | West of Rainbow's End           | James, Alan                           | Alan James           | tt0030959 |
| 1746580878 | 1935 | 1935 | Tumbling Tumbleweeds            | Tumbling Tumbleweeds            | Kane, Joseph                          | Joseph Kane          | tt0027139 |
| 1746574307 | 1958 | 1958 | Ambush at Cimarron Pass         | Ambush at Cimarron Pass         | Copelan, Jodie                        | Jodie Copelan        | tt0051349 |
| 1746410222 | 1991 | 1990 | Pastime                         | Pastime                         | Armstrong, Robin B.                   | Robin B. Armstrong   | tt0105109 |
| 1746562149 | 1953 | 1953 | Fort Vengeance                  | Fort Vengeance                  | Selander, Lesley                      | Lesley Selander      | tt0045785 |
| 1746577495 | 1935 | 1935 | The Return of Peter Grimm       | The Return of Peter Grimm       | Nicholls, George                      | George Nichols Jr.   | tt0026926 |
| 1746454465 | 1943 | 1943 | Wagon Tracks West               | Wagon Tracks West               | Bretherton, Howard                    | Howard Bretherton    | tt0036509 |
| 1746568283 | 1933 | 1933 | Black Beauty                    | Black Beauty                    | Rosen, Phil                           | Phil Rosen           | tt0023815 |
| 1746516501 | 1920 | 1920 | Mothers of Men                  | Mothers of Men                  | José, Edward                          | Edward José          | tt0011483 |
| 1745359986 | 2003 | 2003 | Kill Bill – Vol. 1              | Kill Bill: Vol. 1               | Tarantino, Quentin                    | Quentin Tarantino    | tt0266697 |
| 1745293557 | 2007 | 2007 | I Think I Love My Wife          | I Think I Love My Wife          | Rock, Chris                           | Chris Rock           | tt0770772 |
| 1746438956 | 1942 | 1942 | Dr. Broadway                    | Dr. Broadway                    | Mann, Anthony                         | Anthony Mann         | tt0034678 |
| 1746582875 | 1936 | 1936 | King of the Pecos               | King of the Pecos               | Kane, Joseph                          | Joseph Kane          | tt0027849 |
| 1746561220 | 1932 | 1932 | Young America                   | Young America                   | Borzage, Frank                        | Frank Borzage        | tt0023719 |
| 1746504054 | 1922 | 1922 | Step On It                      | Step on It!                     | Conway, Jack                          | Jack Conway          | tt0013636 |
| 1745359117 | 2008 | 2008 | Cloverfield                     | Cloverfield                     | Reeves, Matt                          | Matt Reeves          | tt1060277 |
| 1746569835 | 1957 | 1957 | The Vintage                     | The Vintage                     | Hayden, Jeffrey                       | Jeffrey Hayden       | tt0051167 |
| 1746561607 | 1965 | 1965 | White Hunter                    | White Hunter                    | Michael, George                       | George Michael       | tt0386876 |
| 1746580457 | 1938 | 1938 | Ghost Town Riders               | Ghost Town Riders               | Waggnar, George                       | George Waggnar       | tt0030179 |
| 1746419946 | 1993 | 1993 | Schindler's List                | Schindler's List                | Spielberg, Steven                     | Steven Spielberg     | tt0108052 |
| 1746574489 | 1952 | 1952 | Skirts Ahoy!                    | Skirts Ahoy!                    | Lanfield, Sidney                      | Sidney Lanfield      | tt0045155 |
| 1769972849 | 1963 | 1963 | Hollywood's World of Flesh      | Hollywood's World of Flesh      | Frost, R. L.                          | Lee Frost            | tt0125157 |
| 1746569750 | 1957 | 1957 | The Enemy Below                 | The Enemy Below                 | Powell, Dick                          | Dick Powell          | tt0050356 |
| 1746409108 | 1991 | 1990 | Book of Love                    | Book of Love                    | Shaye, Robert                         | Robert Shaye         | tt0099166 |
| 1746514054 | 1914 | 1914 | Lola                            | Lola                            | Young, James                          | James Young          | tt0004249 |

|                   |             |             |                                         |                                         |                                 |                        |                  |
|-------------------|-------------|-------------|-----------------------------------------|-----------------------------------------|---------------------------------|------------------------|------------------|
| 1746520787        | 1925        | 1925        | A Slave of Fashion                      | A Slave of Fashion                      | Henley, Hobart                  | Hobart Henley          | tt0016358        |
| 1746569862        | 1958        | 1958        | Teenage Cave Man                        | Teenage Cave Man                        | Corman, Roger                   | Roger Corman           | tt0052279        |
| 1746561162        | 1932        | 1932        | Love in High Gear                       | Love in High Gear                       | Strayer, Frank                  | Frank R. Strayer       | tt0022093        |
| 1746580584        | 1938        | 1938        | South of Arizona                        | South of Arizona                        | Nelson, Sam                     | Sam Nelson             | tt0134109        |
| 1746474837        | 1948        | 1948        | Sons of Adventure                       | Sons of Adventure                       | Canutt, Yakima                  | Yakima Canutt          | tt0040822        |
| 1746503292        | 1920        | 1920        | Curtain                                 | Curtain                                 | Young, James                    | James Young            | tt0145732        |
| 1746235442        | 1979        | 1979        | Walk Proud                              | Walk Proud                              | Collins, Robert                 | Robert L. Collins      | tt0080114        |
| 1746419198        | 1989        | 1989        | She-Devil                               | She Devil                               | Seidelman, Susan                | Susan Seidelman        | tt0098309        |
| 1746503054        | 1915        | 1915        | I'm Glad My Boy Grew Up to Be a Soldier | I'm Glad My Boy Grew Up to Be a Soldier | Beal, Frank                     | Frank Beal             | tt0005533        |
| 1746186208        | 1969        | 1969        | This Is My Alaska                       | This Is My Alaska                       | Shebal, Leroy                   |                        | tt1180350        |
| 1746578802        | 1962        | 1962        | The Wacky World of Dr. Morgus           | The Wacky World of Dr. Morgus           | Haig, Roul                      | Roul Haig              | tt0251470        |
| 1746533031        | 1923        | 1923        | The Call of the Canyon                  | The Call of the Canyon                  | Fleming, Victor                 | Victor Fleming         | tt0013906        |
| 1746524564        | 1910        | 1910        | The Mystery of Lonely Gulch             | The Mystery of Lonely Gulch             |                                 | Theodore Wharton       | tt1498876        |
| 1746422969        | 1990        | 1990        | Spaced Invaders                         | Spaced Invaders                         | Johnson, Patrick Read           | Patrick Read Johnson   | tt0100666        |
| 1746580445        | 1934        | 1935        | Hell'dorado                             | Hell'dorado                             | Cruze, James                    | James Cruze            | tt0026462        |
| 1746474977        | 1948        | 1948        | Last of the Wild Horses                 | Last of the Wild Horses                 | Lippert, Robert L.              | Robert L. Lippert      | tt0040530        |
| 1746583159        | 1939        | 1939        | Should a Girl Marry?                    | Should a Girl Marry?                    | Hillyer, Lambert                | Lambert Hillyer        | tt0031923        |
| 1746578626        | 1962        | 1962        | The Spiral Road                         | The Spiral Road                         | Mulligan, Robert                | Robert Mulligan        | tt0056516        |
| 1746584205        | 1937        | 1937        | They Won't Forget                       | They Won't Forget                       | LeRoy, Mervyn                   | Mervyn LeRoy           | tt0029658        |
| 1746436041        | 1942        | 1942        | Sweetheart of the Fleet                 | Sweetheart of the Fleet                 | Barton, Charles                 | Charles Barton         | tt0035401        |
| 1746424057        | 1941        | 1941        | Louisiana Purchase                      | Louisiana Purchase                      | Cummings, Irving                | Irving Cummings        | tt0033851        |
| 1746574704        | 1936        | 1936        | Empty Saddles                           | Empty Saddles                           | Selander, Lesley                | Lesley Selander        | tt0027571        |
| 1746216661        | 1966        | 1966        | The Street Is My Beat                   | The Street Is My Beat                   | Berwick, Irvin                  | Irvin Berwick          | tt0216244        |
| 1746583964        | 1936        | 1935        | Magnificent Obsession                   | Magnificent Obsession                   | Stahl, John M.                  | John M. Stahl          | tt0026667        |
| 1746555333        | 1957        | 1957        | Man on Fire                             | Man on Fire                             | MacDougall, Ranald              | Ranald MacDougall      | tt0050682        |
| 1746208128        | 1969        | 1969        | The Trouble with Girls                  | The Trouble with Girls                  | Tewksbury, Peter                | Peter Tewksbury        | tt0065125        |
| 1746577331        | 1959        | 1959        | Never Steal Anything Small              | Never Steal Anything Small              | Lederer, Charles                | Charles Lederer        | tt0053109        |
| 1746580810        | 1937        | 1937        | Merry-Go-Round of 1938                  | Merry Go Round of 1938                  | Cummings, Irving                | Irving Cummings        | tt0029234        |
| 1746524276        | 1915        | 1915        | The Green Cloak                         | The Green Cloak                         | Edwin, Walter                   | Walter Edwin           | tt0005426        |
| 1746500273        | 1925        | 1925        | Why Women Love                          | Why Women Love                          |                                 | Edwin Carewe           | tt0016528        |
| 1746523559        | 1910        | 1910        | The Tenderfoot's Triumph                | The Tenderfoot's Triumph                | Powell, Frank                   | Frank Powell           | tt0001413        |
| 1746210948        | 1971        | 1971        | The Todd Killings                       | The Todd Killings                       | Shear, Barry                    | Barry Shear            | tt0066463        |
| 1746257247        | 1975        | 1974        | Act of Vengeance                        | Act of Vengeance                        | Kelljchian, Robert              | Bob Kelljan            | tt0072067        |
| 1746568346        | 1952        | 1952        | Walk East on Beacon                     | Walk East on Beacon!                    | Werker, Alfred                  | Alfred L. Werker       | tt0045309        |
| 1746410879        | 1993        | 1993        | The Pickle                              | The Pickle                              | Mazursky, Paul                  | Paul Mazursky          | tt0107824        |
| 1746525168        | 1920        | 1920        | Run 'em Ragged                          | Run 'Em Ragged                          | Goulding, Alf                   | Alfred J. Goulding     | tt0142813        |
| 1746248837        | 1974        | 1975        | Boss Nigger                             | Boss Nigger                             | Arnold, Jack                    | Jack Arnold            | tt0072725        |
| 1746530692        | 1949        | 1949        | Shamrock Hill                           | Shamrock Hill                           | Dreifuss, Arthur                | Arthur Dreifuss        | tt0041863        |
| 1746569999        | 1958        | 1958        | Blood Arrow                             | Blood Arrow                             | Warren, Charles Marquis         | Charles Marquis Warren | tt0051420        |
| 1745341617        | 2004        | 2004        | The Butterfly Effect                    | The Butterfly Effect                    | Bress, Eric ; Gruber, J. Mackye | Eric Bress             | tt0289879        |
| 1746473912        | 1946        | 1946        | Plainsman and the Lady                  | Plainsman and the Lady                  | Kane, Joe                       | Joseph Kane            | tt0038846        |
| 1746475742        | 1946        | 1946        | The Secret Heart                        | The Secret Heart                        | Leonard, Robert Z.              | Robert Z. Leonard      | tt0038916        |
| 1746487602        | 1919        | 1919        | Captain Kidd, Jr.                       | Captain Kidd, Jr.                       | Taylor, William D.              | William Desmond Taylor | tt0009987        |
| 1746454948        | 1941        | 1941        | Arizona Bound                           | Arizona Bound                           | Bennet, Spencer                 | Spencer Gordon Bennet  | tt0033351        |
| 1746566040        | 1953        | 1953        | Violated                                | Violated                                | Strate, Walter                  | Walter Strate          | tt0046520        |
| 1746422922        | 1989        | 1989        | Slaves of New York                      | Slaves of New York                      | Ivory, James                    | James Ivory            | tt0098347        |
| 1746466705        | 1917        | 1917        | The Lair of the Wolf                    | The Lair of the Wolf                    | Swickard, Charles               | Charles Swickard       | tt0008167        |
| 1746199295        | 1966        | 1966        | The Bubble                              | The Bubble                              | Oboler, Arch                    | Arch Oboler            | tt0060396        |
| 1746582057        | 1928        | 1928        | The River Pirate                        | The River Pirate                        | Howard, William K.              | William K. Howard      | tt0019329        |
| 1746465371        | 1946        | 1946        | Night Train to Memphis                  | Night Train to Memphis                  | Selander, Lesley F.             | Lesley Selander        | tt0038775        |
| <b>1746513628</b> | <b>1923</b> | <b>1923</b> | <b>Crooked Alley</b>                    | <b>Crooked Alley</b>                    | <b>Hill, Robert F.</b>          | <b>Robert F. Hill</b>  | <b>tt0013959</b> |
| 1745302893        | 2007        | 2006        | Alone with Her                          | Alone with Her                          | Nicholas, Eric                  | Eric Nicholas          | tt0472259        |
| 1746553539        | 1964        | 1964        | Moro Witch Doctor                       | Moro Witch Doctor                       | Romero, Eddie                   | Eddie Romero           | tt0058373        |
| 1745293951        | 2006        | 2006        | Mad Cowgirl                             | Mad Cowgirl                             | Hatanaka, Gregory               | Gregory Hatanaka       | tt0438204        |
| 1746513789        | 1910        | 1910        | Ranson's Folly                          | Ranson's Folly                          |                                 | Edwin S. Porter        | tt1515891        |
| 1746582324        | 1928        | 1928        | Fangs of the Wild                       | Fangs of the Wild                       | Storm, Jerome                   | Jerome Storm           | tt0018874        |
| 1746585289        | 1929        | 1929        | The Air Legion                          | The Air Legion                          | Glennon, Bert                   | Bert Glennon           | tt0019628        |



|            |      |      |                                  |                                  |                          |                                     |           |
|------------|------|------|----------------------------------|----------------------------------|--------------------------|-------------------------------------|-----------|
| 1746453616 | 1942 | 1941 | Confessions of Boston Blackie    | Confessions of Boston Blackie    | Dmytryk, Edward          | Edward Dmytryk                      | tt0033484 |
| 1746554377 | 1965 | 1965 | John Goldfarb, Please Come Home! | John Goldfarb, Please Come Home! | Thompson, J. Lee         | J. Lee Thompson                     | tt0059336 |
| 1746583264 | 1928 | 1928 | The Fleet's In                   | The Fleet's In                   | St. Clair, Malcolm       | Malcolm St. Clair                   | tt0018896 |
| 1746410669 | 1988 | 1988 | Gorillas in the Mist             | Gorillas in the Mist             | Apted, Michael           | Michael Apted                       | tt0095243 |
| 1746574517 | 1935 | 1935 | Motive for Revenge               | Motive for Revenge               | Lynwood, Burt            | Burt P. Lynwood                     | tt0026731 |
| 1746584116 | 1937 | 1937 | That Certain Woman               | That Certain Woman               | Goulding, Edmund         | Edmund Goulding                     | tt0029650 |
| 1745375163 | 2009 | 2008 | American Swing                   | American Swing                   | Kaufman, Mat ; Hart, Jon | Jon Hart                            | tt1058058 |
| 1746421602 | 1993 | 1993 | Ruby in Paradise                 | Ruby in Paradise                 | Nunez, Victor            | Victor Nunez                        | tt0108000 |
| 1746566136 | 1955 | 1955 | The Far Horizons                 | The Far Horizons                 | Maté, Rudolph            | Rudolph Maté                        | tt0048056 |
| 1746524466 | 1913 | 1913 | The Fight for Millions           | The Fight for Millions           | Blaché, Herbert          | Herbert Blaché                      | tt0002859 |
| 1746583157 | 1936 | 1936 | King of the Royal Mounted        | King of the Royal Mounted        | Bretherton, Howard       | Howard Bretherton                   | tt0027850 |
| 1746197919 | 1969 | 1969 | Finney                           | Finney                           | Hare, Bill               | Bill Hare                           | tt0192024 |
| 1746523345 | 1910 | 1910 | The Regeneration of Father       | The Regeneration of Father       |                          |                                     | tt1824239 |
| 1746562290 | 1957 | 1957 | The Night the World Exploded     | The Night the World Exploded     | Sears, Fred F.           | Fred F. Sears                       | tt0050767 |
| 1746524383 | 1917 | 1917 | The Devil's Assistant            | The Devil's Assistant            | Pollard, Harry           | Harry A. Pollard                    | tt0007854 |
| 1746454183 | 1995 | 1995 | Under Siege 2: Dark Territory    | Under Siege 2: Dark Territory    | Murphy, Geoff            | Geoff Murphy                        | tt0114781 |
| 1746566728 | 1933 | 1933 | My Woman                         | My Woman                         | Schertzinger, Victor     | Victor Schertzinger                 | tt0024365 |
| 1746423272 | 1993 | 1993 | Fearless                         | Fearless                         | Weir, Peter              | Peter Weir                          | tt0106881 |
| 1746508902 | 1926 | 1925 | The Wildcat                      | The Wildcat                      | Fraser, Harry L.         | Harry L. Fraser                     | tt0141987 |
| 1746491771 | 1947 | 1947 | Key Witness                      | Key Witness                      | Lederman, D. Ross        | D. Ross Lederman                    | tt0039529 |
| 1746500257 | 1924 | 1924 | Mile a Minute Morgan             | Mile a Minute Morgan             | Mattison, Frank S.       | Frank S. Mattison                   | tt0015137 |
| 1746566260 | 1957 | 1957 | Until They Sail                  | Until They Sail                  | Wise, Robert             | Robert Wise                         | tt0051141 |
| 1746550170 | 1954 | 1954 | Go Man Go                        | Go Man Go                        | Howe, James Wong         | James Wong Howe                     | tt0047032 |
| 1746573109 | 1932 | 1932 | Devil's Lottery                  | Devil's Lottery                  | Taylor, Sam              | Sam Taylor                          | tt0022816 |
| 1746475288 | 1944 | 1944 | Winged Victory                   | Winged Victory                   | Cukor, George            | George Cukor                        | tt0037467 |
| 1746580610 | 1938 | 1938 | Law of the Underworld            | Law of the Underworld            | Landers, Lew             | Lew Landers                         | tt0030353 |
| 1746583423 | 1930 | 1930 | Talking It Over                  | Talking It Over                  |                          | Murray Roth                         | tt1546026 |
| 1746578501 | 1961 | 1961 | A Thunder of Drums               | A Thunder of Drums               | Newman, Joseph M.        | Joseph M. Newman                    | tt0055524 |
| 1746474142 | 1945 | 1945 | Saddle Serenade                  | Saddle Serenade                  | Drake, Oliver            | Oliver Drake                        | tt0163189 |
| 1746508687 | 1926 | 1926 | Just Suppose                     | Just Suppose                     | Webb, Kenneth            | Kenneth S. Webb                     | tt0017014 |
| 1746523049 | 1916 | 1916 | New York                         | New York                         | Fitzmaurice, George      | George Fitzmaurice                  | tt0145119 |
| 1746210271 | 1970 | 1970 | Something for Everyone           | Something for Everyone           | Prince, Harold           | Harold Prince                       | tt0066392 |
| 1746218900 | 1972 | 1972 | Blacula                          | Blacula                          | Crain, William           | William Crain                       | tt0068284 |
| 1746504424 | 1922 | 1922 | Arabian Love                     | Arabian Love                     | Storm, Jerome            | Jerome Storm                        | tt0012903 |
| 1746509216 | 1925 | 1925 | Makers of Men                    | Makers of Men                    | Sheldon, Forrest         | Forrest Sheldon                     | tt0016070 |
| 1746555653 | 1955 | 1955 | Two-Gun Lady                     | Two Gun Lady                     | Bartlett, Richard H.     | Richard Bartlett                    | tt0049897 |
| 1746560744 | 1932 | 1932 | Vanishing Men                    | Vanishing Men                    | Fraser, Harry            | Harry L. Fraser                     | tt0023651 |
| 1746584479 | 1931 | 1931 | Svengali                         | Svengali                         | Mayo, Archie             | Archie Mayo                         | tt0022454 |
| 1746499909 | 1948 | 1948 | Marshal of Amarillo              | Marshal of Amarillo              | Ford, Philip             | Philip Ford                         | tt0040574 |
| 1746580926 | 1961 | 1961 | You Have To Run Fast             | You Have to Run Fast             | Cahn, Edward L.          | Edward L. Cahn                      | tt0055631 |
| 1746566117 | 1958 | 1958 | The Lineup                       | The Lineup                       | Siegel, Don              | Don Siegel                          | tt0051866 |
| 1746507833 | 1926 | 1926 | Forest Havoc                     | Forest Havoc                     | Paton, Stuart            | Stuart Paton                        | tt0132975 |
| 1746584897 | 1939 | 1939 | Code of the Cactus               | Code of the Cactus               | Newfield, Sam            | Sam Newfield                        | tt0031164 |
| 1746474950 | 1944 | 1944 | The Eve of St. Mark              | The Eve of St. Mark              | Stahl, John M.           | John M. Stahl                       | tt0036803 |
| 1746532472 | 1910 | 1910 | The Tout's Remembrance           | The Tout's Remembrance           |                          | Gilbert M. 'Broncho Billy' Anderson | tt0001419 |
| 1746582058 | 1910 | 1910 | The House with Closed Shutters   | The House with Closed Shutters   | Griffith, D. W.          | D.W. Griffith                       | tt0001256 |
| 1746438286 | 1941 | 1941 | Scattergood Baines               | Scattergood Baines               | Cabanne, Christy         | Christy Cabanne                     | tt0034154 |
| 1746584304 | 1936 | 1936 | The Broken Coin                  | The Broken Coin                  | Herman, Albert           | Albert Herman                       | tt0202277 |
| 1769970559 | 1967 | 1967 | The Singles                      | The Singles                      | Johnsen, S. N.           | Sande N. Johnsen                    | tt0138102 |
| 1746514234 | 1923 | 1923 | Trimmed in Scarlet               | Trimmed in Scarlet               | Conway, Jack             | Jack Conway                         | tt0014563 |
| 1746508231 | 1927 | 1927 | The Range Raiders                | The Range Raiders                | Hurst, Paul              | Paul Hurst                          | tt0155096 |
| 1746474968 | 1947 | 1947 | I Wonder Who's Kissing Her Now?  | I Wonder Who's Kissing Her Now   | Bacon, Lloyd             | Lloyd Bacon                         | tt0039483 |
| 1746409023 | 1982 | 1982 | Jinxed!                          | Jinxed!                          | Siegel, Don              | Don Siegel                          | tt0084173 |
| 1746514064 | 1923 | 1923 | The Silent Command               | The Silent Command               | Edwards, J. Gordon       | J. Gordon Edwards                   | tt0014469 |
| 1746424168 | 1941 | 1941 | Aloma of the South Seas          | Aloma of the South Seas          | Santell, Alfred          | Alfred Santell                      | tt0033331 |
| 1746583820 | 1930 | 1930 | Hook, Line and Sinker            | Hook Line and Sinkers            | Cline, Edward            | Edward F. Cline                     | tt0020987 |
| 1746530668 | 1950 | 1950 | Battling Marshal                 | Battling Marshal                 | Drake, Oliver            | Oliver Drake                        | tt0042232 |

|            |      |      |                                       |                                       |                                   |                       |           |
|------------|------|------|---------------------------------------|---------------------------------------|-----------------------------------|-----------------------|-----------|
| 1746435709 | 1943 | 1943 | Hitler's Madman                       | Hitler's Madman                       | Sirk, Douglas                     | Douglas Sirk          | tt0036005 |
| 1746208469 | 1968 | 1968 | Kona Coast                            | Kona Coast                            | Johnson, Lamont                   | Lamont Johnson        | tt0063194 |
| 1746492084 | 1947 | 1947 | It Had to Be You                      | It Had to Be You                      | Hartman, Don; Maté, Rudolph       | Don Hartman           | tt0039500 |
| 1746491978 | 1945 | 1945 | Earl Carroll Vanities                 | Earl Carroll Vanities                 | Santley, Joseph                   | Joseph Santley        | tt0037664 |
| 1746520781 | 1950 | 1949 | Twelve O'Clock High                   | Twelve O'Clock High                   | King, Henry                       | Henry King            | tt0041996 |
| 1746584078 | 1940 | 1940 | North West Mounted Police             | North West Mounted Police             | De Mille, Cecil B.                | Cecil B. DeMille      | tt0032850 |
| 1746453654 | 1943 | 1943 | Mister Big                            | Mister Big                            | Lamont, Charles                   | Charles Lamont        | tt0036167 |
| 1746198778 | 1969 | 1968 | The Love Bug                          | The Love Bug                          | Stevenson, Robert                 | Robert Stevenson      | tt0064603 |
| 1746562113 | 1957 | 1957 | Sayonara                              | Sayonara                              | Logan, Joshua                     | Joshua Logan          | tt0050933 |
| 1746570328 | 1952 | 1952 | She's Working Her Way Through College | She's Working Her Way Through College | Humberstone, Bruce                | H. Bruce Humberstone  | tt0045144 |
| 1746570247 | 1934 | 1934 | Lightning Strikes Twice               | Lightning Strikes Twice               | Holmes, Ben                       | Ben Holmes            | tt0025395 |
| 1746520275 | 1926 | 1926 | Whispering Canyon                     | Whispering Canyon                     | Forman, Tom                       | Tom Forman            | tt0017549 |
| 1746502815 | 1916 | 1916 | The World Against Him                 | The World Against Him                 | Crane, Frank Hall                 | Frank Hall Crane      | tt0007589 |
| 1746577246 | 1963 | 1963 | Marilyn                               | Marilyn                               |                                   | Henry Koster          | tt0057290 |
| 1746524638 | 1928 | 1928 | Just Married                          | Just Married                          |                                   | Frank R. Strayer      | tt0019044 |
| 1746465014 | 1942 | 1942 | Home in Wyomin'                       | Home in Wyomin'                       | Strayer, Frank                    | Frank R. Strayer      | tt0034866 |
| 1746500965 | 1915 | 1915 | The Builder of Bridges                | The Builder of Bridges                | Morgan, William                   | William Morgan        | tt0005034 |
| 1746574534 | 1937 | 1937 | West of Shanghai                      | West of Shanghai                      | Irving, George                    | George Irving         | tt0029754 |
| 1746569711 | 1954 | 1954 | Cry Vengeance                         | Cry Vengeance                         | Farrow, John                      | John Farrow           | tt0046885 |
| 1746435375 | 2000 | 2000 | Bless the Child                       | Bless the Child                       | Stevens, Mark                     | Mark Stevens          | tt0163983 |
| 1746251263 | 1976 | 1976 | Shout at the Devil                    | Shout at the Devil                    | Russell, Chuck                    | Chuck Russell         | tt0075214 |
| 1746235574 | 1974 | 1974 | Madhouse                              | Madhouse                              | Hunt, Peter                       | Peter R. Hunt         | tt0071790 |
| 1746574070 | 1963 | 1963 | None but the Brave                    | None But the Brave                    | Clark, Jim                        | Jim Clark             | tt0251305 |
| 1746583432 | 1931 | 1931 | Women Go on Forever                   | Women Go on Forever                   | Richardson, Ken                   | Kenneth W. Richardson | tt0022573 |
| 1746525104 | 1920 | 1920 | The Common Sin                        | The Common Sin                        | Lang, Walter                      | Walter Lang           | tt0189435 |
| 1746503794 | 1922 | 1922 | West vs. East                         | West vs. East                         | King, Burton                      | Burton L. King        | tt0177377 |
| 1746507766 | 1924 | 1924 | Sporting Youth                        | Sporting Youth                        | Perez, Marcel                     | Marcel Perez          | tt0015359 |
| 1746584420 | 1939 | 1939 | When Tomorrow Comes                   | When Tomorrow Comes                   | Pollard, Harry A.                 | Harry A. Pollard      | tt0032124 |
| 1746437390 | 1940 | 1940 | Son of Roaring Dan                    | Son of Roaring Dan                    | Stahl, John M.                    | John M. Stahl         | tt0033077 |
| 1746520563 | 1925 | 1925 | The Desert's Price                    | The Desert's Price                    | Beebe, Ford                       | Ford Beebe            | tt0015746 |
| 1745359313 | 2009 | 2008 | The Great Buck Howard                 | The Great Buck Howard                 | Van Dyke, W. S.                   | W.S. Van Dyke         | tt0460810 |
| 1746520328 | 1926 | 1926 | Roaring Rider                         | The Roaring Rider                     | McGinly, Sean                     | Sean McGinly          | tt0017330 |
| 1746248271 | 1968 | 1968 | Blue                                  | Blue                                  | Thorpe, Richard                   | Richard Thorpe        | tt0062742 |
| 1746584104 | 1936 | 1936 | The Music Goes 'Round                 | The Music Goes 'Round                 | Narizzano, Silvio                 | Silvio Narizzano      | tt0028005 |
| 1746577260 | 1961 | 1961 | Guns of the Trees                     | The Music Goes 'Round                 | Schertzinger, Victor              | Victor Schertzinger   | tt0058168 |
| 1746512365 | 1915 | 1915 | Cohen's Luck                          | Guns of the Trees                     | Mekas, Jonas                      | Jonas Mekas           | tt0005104 |
| 1746581047 | 1961 | 1960 | I'll Give My Life                     | Cohen's Luck                          | Collins, John H.                  | John H. Collins       | tt0055001 |
| 1746520110 | 1950 | 1950 | Chain Gang                            | I'll Give My Life                     | Claxton, William F.               | William F. Claxton    | tt0042323 |
| 1746585435 | 1939 | 1939 | Mutiny on the Blackhawk               | Chain Gang                            | Landers, Lew                      | Lew Landers           | tt0031691 |
| 1746574756 | 1933 | 1933 | Shanghai Madness                      | Mutiny on the Blackhawk               | Cabanne, Christy                  | Christy Cabanne       | tt0024546 |
| 1746569923 | 1958 | 1958 | Dreamland Capers                      | Shanghai Madness                      | Blystone, John                    | John G. Blystone      | tt0261663 |
| 1746496769 | 1918 | 1918 | Tongues of Flame                      | Dreamland Capers                      |                                   |                       | tt0009709 |
| 1746566850 | 1933 | 1932 | The Sign of the Cross                 | Tongues of Flame                      | Campbell, Colin                   | Colin Campbell        | tt0023470 |
| 1746509537 | 1926 | 1926 | Blue Streak O'Neil                    | The Sign of the Cross                 | De Mille, Cecil B.                | Cecil B. DeMille      | tt0016665 |
| 1746256114 | 1977 | 1977 | I Never Promised You a Rose Garden    | Blue Streak O'Neil                    | Hurst, Paul                       | Paul Hurst            | tt0076172 |
| 1746500444 | 1926 | 1926 | The Timid Terror                      | I Never Promised You a Rose Garden    | Page, Anthony                     | Anthony Page          | tt0017471 |
| 1746524413 | 1914 | 1914 | The Pit                               | The Timid Terror                      | Andrews, Del                      | Del Andrews           | tt0004473 |
| 1746508065 | 1926 | 1926 | Bardelys the Magnificent              | The Pit                               | Tourneur, Maurice                 | Maurice Tourneur      | tt0016627 |
| 1746508958 | 1949 | 1949 | The Secret Garden                     | Bardelys the Magnificent              | Vidor, King                       | King Vidor            | tt0041855 |
| 1746524787 | 1916 | 1916 | The Libertine                         | The Secret Garden                     | Wilcox, Fred M.                   | Fred M. Wilcox        | tt0163056 |
| 1746582412 | 1935 | 1935 | This Is the Life                      | The Libertine                         | Steger, Julius; Golden, Joseph A. | Joseph A. Golden      | tt0027093 |
| 1746520078 | 1924 | 1924 | So Big                                | This Is the Life                      | Neilan, Marshall                  | Marshall Neilan       | tt0015347 |
| 1746583121 | 1939 | 1939 | The Night of Nights                   | So Big                                | Brabin, Charles                   | Charles Brabin        | tt0031724 |
| 1746516260 | 1920 | 1919 | Fighting Cressy                       | The Night of Nights                   | Milestone, Lewis                  | Lewis Milestone       | tt0010122 |
| 1746257688 | 1978 | 1978 | Who'll Stop the Rain                  | Fighting Cressy                       | Thornby, Robert T.                | Robert Thornby        | tt0078490 |
| 1746408643 | 1981 | 1981 | Sphinx                                | Who'll Stop the Rain                  | Reisz, Karel                      | Karel Reisz           | tt0083113 |
| 1745342040 | 2004 | 2004 | Metallica: Some Kind of Monster       | Sphinx                                | Schaffner, Franklin J.            | Franklin J. Schaffner | tt0387412 |
|            |      |      |                                       | Metallica: Some Kind of Monster       | Berlinger, Joe ; Sinofsky, Bruce  | Joe Berlinger         |           |

|            |      |      |                           |                           |                           |                       |           |
|------------|------|------|---------------------------|---------------------------|---------------------------|-----------------------|-----------|
| 1746218317 | 1968 | 1968 | The Thomas Crown Affair   | The Thomas Crown Affair   | Jewison, Norman           | Norman Jewison        | tt0063688 |
| 1746501583 | 1914 | 1914 | A Factory Magdalen        | A Factory Magdalen        | Bostwick, Elwood Fleet    | Elwood Fleet Bostwick | tt0003925 |
| 1746579035 | 1959 | 1959 | Mustang                   | Mustang!                  | Stephens, Peter           | Tom Gries             | tt0127038 |
| 1746507897 | 1924 | 1924 | Changing Husbands         | Changing Husbands         | Urson, Frank; Iribe, Paul | Paul Iribe            | tt0014767 |
| 1746475923 | 1945 | 1945 | The Body Snatcher         | The Body Snatcher         | Wise, Robert              | Robert Wise           | tt0037549 |
| 1746570990 | 1952 | 1952 | Just for You              | Just for You              | Nugent, Elliott           | Elliott Nugent        | tt0044782 |
| 1746438323 | 1940 | 1940 | Murder on the Yukon       | Murder on the Yukon       | Gasnier, Louis            | Louis J. Gasnier      | tt0032821 |
| 1746501512 | 1915 | 1915 | The Supreme Test          | The Supreme Test          | Le Saint, Edward J.       | Edward LeSaint        | tt0006120 |
| 1746393437 | 1984 | 1984 | Beverly Hills Cop         | Beverly Hills Cop         | Brest, Martin             | Martin Brest          | tt0086960 |
| 1746584419 | 1939 | 1939 | Reno                      | Reno                      | Farrow, John              | John Farrow           | tt0031848 |
| 1746524957 | 1915 | 1914 | The Man Behind the Door   | The Man Behind the Door   | Van, Wally                | Wally Van             | tt0005692 |
| 1769971101 | 1969 | 1969 | Teresa... Darling         | Teresa... Darling         | Stylianou, Michel         | Michel Stylianou      | tt0259634 |
| 1746217439 | 1965 | 1965 | The Third Day             | The Third Day             | Smight, Jack              | Jack Smight           | tt0059795 |
| 1746533192 | 1916 | 1916 | The Hidden Scar           | The Hidden Scar           | O'Neil, Barry             | Barry O'Neil          | tt0006798 |
| 1745293681 | 2007 | 2006 | The Astronaut Farmer      | The Astronaut Farmer      | Polish, Michael           | Michael Polish        | tt0469263 |
| 1746453576 | 1942 | 1942 | Joan of Paris             | Joan of Paris             | Stevenson, Robert         | Robert Stevenson      | tt0034919 |
| 1746520194 | 1925 | 1925 | Silent Sanderson          | Silent Sanderson          | Dunlap, Scott R.          | Scott R. Dunlap       | tt0016350 |
| 1746234581 | 1966 | 1966 | The Quiller Memorandum    | The Quiller Memorandum    | Anderson, Michael         | Michael Anderson      | tt0060880 |
| 1746465219 | 1947 | 1947 | The Beginning or the End  | The Beginning or the End  | Taurog, Norman            | Norman Taurog         | tt0039178 |
| 1746524364 | 1923 | 1923 | The Destroying Angel      | Destroying Angel          | Van Dyke, W. S.           | W.S. Van Dyke         | tt0013986 |
| 1746524288 | 1923 | 1923 | Mysterious Goods          | Mysterious Goods          | Seeling, Charles R.       | Charles R. Seeling    | tt0014300 |
| 1746455082 | 1995 | 1995 | Billy Madison             | Billy Madison             | Davis, Tamra              | Tamra Davis           | tt0112508 |
| 1746523572 | 1927 | 1927 | Cactus Trails             | Cactus Trails             | Pembroke, Percy           | Scott Pembroke        | tt0319133 |
| 1746435331 | 1990 | 1990 | Problem Child             | Problem Child             | Dugan, Dennis             | Dennis Dugan          | tt0100419 |
| 1746524899 | 1923 | 1923 | Poor Men's Wives          | Poor Men's Wives          | Gasnier, Louis J.         | Louis J. Gasnier      | tt0014368 |
| 1746202092 | 1970 | 1970 | Black Roots               | Black Roots               | Rogosin, Lionel           | Lionel Rogosin        | tt1196121 |
| 1746565881 | 1955 | 1955 | Interrupted Melody        | Interrupted Melody        | Bernhardt, Curtis         | Curtis Bernhardt      | tt0048210 |
| 1746566739 | 1933 | 1933 | Gun Justice               | Gun Justice               | James, Alan               | Alan James            | tt0025212 |
| 1746508169 | 1926 | 1926 | Men of the Night          | Men of the Night          | Rogell, Albert            | Albert S. Rogell      | tt0017134 |
| 1746553756 | 1964 | 1964 | The Patsy                 | The Patsy                 | Lewis, Jerry              | Jerry Lewis           | tt0058456 |
| 1746211275 | 1974 | 1974 | Hearts and Minds          | Hearts and Minds          | Davis, Peter              | Peter Davis           | tt0071604 |
| 1746581027 | 1960 | 1960 | The Boy and the Pirates   | The Boy and the Pirates   | Gordon, Bert I.           | Bert I. Gordon        | tt0053672 |
| 1746581882 | 1928 | 1928 | The Pinto Kid             | The Pinto Kid             | King, Louis               | Louis King            | tt0019275 |
| 1746421587 | 1996 | 1996 | Me & My Matchmaker        | Me and My Matchmaker      | Wexler, Mark              | Mark Wexler           | tt0117013 |
| 1746234996 | 1977 | 1977 | Greased Lightning         | Greased Lightning         | Schultz, Michael          | Michael Schultz       | tt0076106 |
| 1746583679 | 1929 | 1929 | Words and Music           | Words and Music           | Tinling, James            | James Tinling         | tt0020604 |
| 1746580534 | 1938 | 1938 | Call of the Rockies       | Call of the Rockies       | James, Alan               | Alan James            | tt0029960 |
| 1746513462 | 1917 | 1917 | Brand's Daughter          | Brand's Daughter          | Harvey, Harry             | Harry Harvey          | tt0007745 |
| 1746574869 | 1933 | 1933 | Christopher Bean          | Christopher Bean          | Wood, Sam                 | Sam Wood              | tt0023890 |
| 1746504530 | 1921 | 1921 | The Devil                 | The Devil                 | Young, James              | James Young           | tt0012107 |
| 1746520672 | 1925 | 1925 | Soul Mates                | Soul Mates                | Conway, Jack              | Jack Conway           | tt0017420 |
| 1746574677 | 1934 | 1934 | Journal of a Crime        | Journal of a Crime        | Keighley, William         | William Keighley      | tt0025333 |
| 1746582352 | 1931 | 1931 | Indiscreet                | Indiscreet                | McCarey, Leo              | Leo McCarey           | tt0022000 |
| 1746525060 | 1921 | 1921 | Without Benefit of Clergy | Without Benefit of Clergy | Young, James              | James Young           | tt0012856 |
| 1746200597 | 1965 | 1965 | Orgy of the Dead          | Orgy of the Dead          |                           | Stephen C. Apostolof  | tt0054240 |
| 1746437308 | 1941 | 1941 | Sergeant York             | Sergeant York             | Hawks, Howard             | Howard Hawks          | tt0034167 |
| 1746577522 | 1937 | 1937 | Flying Fists              | Flying Fists              | Hill, Bob                 | Robert F. Hill        | tt0030143 |
| 1746570116 | 1952 | 1952 | Strip Tease Girl          | Striptease Girl           |                           |                       | tt0160921 |
| 1746464824 | 1941 | 1941 | Ice-Capades               | Ice Capades               | Santley, Joseph           | Joseph Santley        | tt0033749 |
| 1745395785 | 2010 | 2010 | Tiny Furniture            | Tiny Furniture            | Dunham, Lena              | Lena Dunham           | tt1570989 |
| 1746583586 | 1930 | 1929 | The Love Parade           | The Love Parade           | Lubitsch, Ernst           | Ernst Lubitsch        | tt0020112 |
| 1746582216 | 1951 | 1950 | The Flying Missile        | The Flying Missile        | Levin, Henry              | Henry Levin           | tt0042468 |
| 1746566148 | 1957 | 1957 | Istanbul                  | Istanbul                  | Pevney, Joseph            | Joseph Pevney         | tt0050552 |
| 1746580900 | 1938 | 1938 | Life Goes On              | Life Goes On              | Nolte, William            | William L. Nolte      | tt0030365 |
| 1746559940 | 1964 | 1964 | For Those Who Think Young | For Those Who Think Young | Martinson, Leslie H.      | Leslie H. Martinson   | tt0058110 |
| 1746269714 | 1978 | 1978 | Sweater Girls             | Sweater Girls             | Jones, Don                | Don Jones             | tt0081583 |
| 1746574073 | 1961 | 1961 | Go Naked in the World     | Go Naked in the World     | MacDougall, Ranald        | Ranald MacDougall     | tt0054933 |

|            |      |      |                                  |                                  |                                |                       |           |
|------------|------|------|----------------------------------|----------------------------------|--------------------------------|-----------------------|-----------|
| 1746455774 | 1999 | 1998 | Lucinda's Spell                  | Lucinda's Spell                  | Jacobs, Jon                    | Jon Jacobs            | tt0165866 |
| 1746524843 | 1917 | 1917 | Bondage                          | Bondage                          | Park, Ida May                  | Ida May Park          | tt0007736 |
| 1746408721 | 1986 | 1986 | Solarbabies                      | Solarbabies                      | Johnson, Alan                  | Alan Johnson          | tt0091981 |
| 1746502571 | 1917 | 1917 | Young Mother Hubbard             | Young Mother Hubbard             | Berthelet, Arthur              | Arthur Berthelet      | tt0008797 |
| 1746514976 | 1910 | 1910 | She's Done It Again              | She's Done It Again              | Carleton, Lloyd B.             | Lloyd B. Carleton     | tt0344327 |
| 1746574213 | 1959 | 1959 | Compulsion                       | Compulsion                       | Fleischer, Richard             | Richard Fleischer     | tt0052700 |
| 1746577192 | 1959 | 1959 | The Bat                          | The Bat                          | Wilbur, Crane                  | Crane Wilbur          | tt0052602 |
| 1746393363 | 1987 | 1987 | Living on Tokyo Time             | Living on Tokyo Time             | Okazaki, Steven                | Steven Okazaki        | tt0093429 |
| 1746562398 | 1954 | 1954 | Trouble in the Glen              | Trouble in the Glen              | Wilcox, Herbert                | Herbert Wilcox        | tt0046465 |
| 1746584981 | 1940 | 1940 | Pride and Prejudice              | Pride and Prejudice              | Leonard, Robert Z.             | Robert Z. Leonard     | tt0032943 |
| 1746420884 | 1995 | 1995 | How to Make an American Quilt    | How to Make an American Quilt    | Moorhouse, Jocelyn             | Jocelyn Moorhouse     | tt0113347 |
| 1746567123 | 1932 | 1932 | Without Honor                    | Without Honors                   | Nigh, William                  | William Nigh          | tt0023703 |
| 1746584095 | 1935 | 1935 | The Cowboy and the Bandit        | The Cowboy and the Bandit        | Herman, Al                     | Albert Herman         | tt0026243 |
| 1746581604 | 1929 | 1929 | The Show of Shows                | The Show of Shows                | Adolfi, John G.                | John G. Adolfi        | tt0020403 |
| 1746508134 | 1925 | 1925 | The Dark Angel                   | The Dark Angel                   | Fitzmaurice, George            | George Fitzmaurice    | tt0015735 |
| 1745341016 | 2003 | 2003 | Bringing Down the House          | Bringing Down the House          | Shankman, Adam                 | Adam Shankman         | tt0305669 |
| 1746218925 | 1980 | 1980 | Altered States                   | Altered States                   | Russell, Ken                   | Ken Russell           | tt0080360 |
| 1745282686 | 2007 | 2007 | Evan Almighty                    | Evan Almighty                    | Shadyac, Tom                   | Tom Shadyac           | tt0413099 |
| 1746566129 | 1953 | 1953 | Pack Train                       | Pack Train                       | Archainbaud, George            | George Archainbaud    | tt0046156 |
| 1746582672 | 1938 | 1938 | Topa Topa                        | Topa Topa                        | Moore, Vin; Hutchison, Charles | Charles Hutchison     | tt0032666 |
| 1746578395 | 1963 | 1963 | Kings of the Sun                 | Kings of the Sun                 | Thompson, J. Lee               | J. Lee Thompson       | tt0057225 |
| 1746496761 | 1918 | 1918 | Nobody's Wife                    | Nobody's Wife                    | Le Saint, Edward J.            | Edward LeSaint        | tt0009432 |
| 1746523711 | 1913 | 1913 | The Sea Wolf                     | The Sea Wolf                     | Bosworth, Hobart               | Hobart Bosworth       | tt0003362 |
| 1746567976 | 1933 | 1933 | Song of the Eagle                | Song of the Eagle                | Murphy, Ralph                  | Ralph Murphy          | tt0024599 |
| 1746563886 | 1952 | 1952 | The Quiet Man                    | The Quiet Man                    | Ford, John                     | John Ford             | tt0045061 |
| 1746582861 | 1937 | 1937 | The Lady Fights Back             | The Lady Fights Back             | Carruth, Milton                | Milton Carruth        | tt0029104 |
| 1746439411 | 1942 | 1942 | Canal Zone                       | Canal Zone                       | Landers, Lew                   | Lew Landers           | tt0034572 |
| 1746583721 | 1929 | 1929 | Big News                         | Big News                         | La Cava, Gregory               | Gregory La Cava       | tt0019690 |
| 1746474973 | 1948 | 1948 | The Fighting Ranger              | The Fighting Ranger              | Hillyer, Lambert               | Lambert Hillyer       | tt0040357 |
| 1746574783 | 1935 | 1935 | A Dog of Flanders                | A Dog of Flanders                | Sloman, Edward                 | Edward Sloman         | tt0026285 |
| 1746409510 | 1988 | 1988 | The Wash                         | The Wash                         | Uno, Michael Toshiyuki         | Michael Toshiyuki Uno | tt0096424 |
| 1746200559 | 1970 | 1969 | The Computer Wore Tennis Shoes   | The Computer Wore Tennis Shoes   | Butler, Robert                 | Robert Butler         | tt0065566 |
| 1746574648 | 1935 | 1934 | The Brand of Hate                | The Brand of Hate                | Collins, Lew                   | Lewis D. Collins      | tt0024911 |
| 1746507750 | 1926 | 1926 | The Torrent                      | Torrent                          | Bell, Monta                    | Monta Bell            | tt0017480 |
| 1746208717 | 1969 | 1969 | Strategy of Terror               | Strategy of Terror               | Smight, Jack                   | Jack Smight           | tt0065042 |
| 1746508895 | 1924 | 1924 | The Street of Tears              | The Street of Tears              | Vale, Travers                  | Travers Vale          | tt0015374 |
| 1769969340 | 1930 | 1930 | Some Babies                      | Some Babies                      | Fox, Wallace                   | Wallace Fox           | tt0830637 |
| 1746509268 | 1926 | 1926 | Partners Again                   | Partners Again                   | King, Henry                    | Henry King            | tt0017254 |
| 1746580762 | 1938 | 1938 | West of Cheyenne                 | West of Cheyenne                 | Nelson, Sam                    | Sam Nelson            | tt0132622 |
| 1746561894 | 1954 | 1954 | Secret of the Incas              | Secret of the Incas              | Hopper, Jerry                  | Jerry Hopper          | tt0047464 |
| 1746577677 | 1933 | 1933 | Lightning Range                  | Lightning Range                  | Dixon, Denver                  | Victor Adamson        | tt0132279 |
| 1746508243 | 1924 | 1924 | Hit and Run                      | Hit and Run                      | Sedgwick, Edward               | Edward Sedgwick       | tt0014994 |
| 1746424462 | 1942 | 1942 | Sheriff of Sage Valley           | Sheriff of Sage Valley           | Scott, Sherman                 | Sam Newfield          | tt0035316 |
| 1746504389 | 1918 | 1918 | Dolly's Vacation                 | Dolly's Vacation                 | Bertram, William               | William Bertram       | tt0184411 |
| 1746409426 | 1984 | 1983 | Android                          | Android                          | Lipstadt, Aaron                | Aaron Lipstadt        | tt0083557 |
| 1746571816 | 1931 | 1931 | Confessions of a Co-ed           | Confessions of a Co Ed           | Burton, David; Murphy, Dudley  | David Burton          | tt0021758 |
| 1746503759 | 1917 | 1917 | Zollenstein                      | Zollenstein                      | Jones, Edgar                   | Edgar Jones           | tt0008802 |
| 1746584696 | 1929 | 1929 | The Phantom Rider                | The Phantom Rider                | McGowan, J. P.                 | J.P. McGowan          | tt0020266 |
| 1746582533 | 1935 | 1935 | Condemned to Live                | Condemned to Live                | Strayer, Frank R.              | Frank R. Strayer      | tt0026230 |
| 1746500622 | 1925 | 1925 | North of Nome                    | North of Nome                    | Johnston, Raymond K.           | Raymond Johnson       | tt0142701 |
| 1746574129 | 1961 | 1961 | Snow White and the Three Stooges | Snow White and the Three Stooges | Lang, Walter                   | Walter Lang           | tt0055458 |
| 1746583053 | 1939 | 1939 | Torture Ship                     | Torture Ship                     | Halperin, Victor               | Victor Halperin       | tt0032047 |
| 1746453554 | 1940 | 1939 | Geronimo                         | Geronimo                         | Sloane, Paul H.                | Paul Sloane           | tt0031365 |
| 1745309522 | 2006 | 2006 | Final Destination 3              | Final Destination 3              | Wong, James                    | James Wong            | tt0414982 |
| 1746502484 | 1913 | 1913 | The Third Degree                 | The Third Degree                 | O'Neil, Barry                  | Barry O'Neil          | tt0003449 |
| 1746393499 | 1983 | 1983 | Strange Invaders                 | Strange Invaders                 | Laughlin, Michael              | Michael Laughlin      | tt0086374 |
| 1746525095 | 1920 | 1920 | The Fighting Chance              | The Fighting Chance              | Maigne, Charles                | Charles Maigne        | tt0162324 |

|            |      |      |                                        |                                        |                                |                     |           |
|------------|------|------|----------------------------------------|----------------------------------------|--------------------------------|---------------------|-----------|
| 1746508745 | 1924 | 1924 | Rarin' To Go                           | Rarin' to Go                           | Thorpe, Richard                | Richard Thorpe      | tt0015261 |
| 1746512853 | 1922 | 1922 | Fools First                            | Fools First                            | Neilan, Marshall               | Marshall Neilan     | tt0013141 |
| 1746410157 | 1986 | 1986 | Star Trek IV: The Voyage Home          | Star Trek IV: The Voyage Home          | Nimoy, Leonard                 | Leonard Nimoy       | tt0092007 |
| 1746514968 | 1927 | 1927 | Driven From Home                       | Driven from Home                       | Young, James                   | James Young         | tt0017831 |
| 1746581022 | 1960 | 1960 | Date Bait                              | Date Bait                              | Ireland, O'Dale                | O'Dale Ireland      | tt0053751 |
| 1746575066 | 1937 | 1937 | Top of the Town                        | Top of the Town                        | Murphy, Ralph; Lang, Walter    | Ralph Murphy        | tt0029680 |
| 1746583778 | 1930 | 1930 | Jazz Cinderella                        | The Jazz Cinderella                    | Pembroke, Scott                | Scott Pembroke      | tt0021011 |
| 1746438741 | 1995 | 1995 | First Knight                           | First Knight                           | Zucker, Jerry                  | Jerry Zucker        | tt0113071 |
| 1746421590 | 1991 | 1991 | Dogfight                               | Dogfight                               | Savoca, Nancy                  | Nancy Savoca        | tt0101748 |
| 1746583645 | 1930 | 1930 | Breezy Bill                            | Breezy Bill                            | McGowan, J. P.                 | J.P. McGowan        | tt0020710 |
| 1746422991 | 1991 | 1991 | Star Trek VI: The Undiscovered Country | Star Trek VI: The Undiscovered Country | Meyer, Nicholas                | Nicholas Meyer      | tt0102975 |
| 1746578385 | 1960 | 1960 | Tall Story                             | Tall Story                             | Logan, Joshua                  | Joshua Logan        | tt0054367 |
| 1746584499 | 1930 | 1930 | Last of the Duanes                     | The Last of the Duanes                 | Werker, Alfred L.              | Alfred L. Werker    | tt0021051 |
| 1746580216 | 1935 | 1935 | The Perfect Clue                       | The Perfect Clue                       | Vignola, Robert G.             | Robert G. Vignola   | tt0026863 |
| 1746419938 | 1990 | 1990 | Flashback                              | Flashback                              | Amurri, Franco                 | Franco Amurri       | tt0099581 |
| 1746507889 | 1924 | 1924 | Pot Luck Pard                          | Pot Luck Pard                          |                                | Forrest Sheldon     | tt0015246 |
| 1746580442 | 1938 | 1938 | Gambling Ship                          | Gambling Ship                          | Scotto, Aubrey                 | Aubrey Scotto       | tt0030167 |
| 1746577810 | 1937 | 1937 | Outcast                                | Outcast                                | Florey, Robert                 | Robert Florey       | tt0029360 |
| 1746578507 | 1958 | 1958 | tom thumb                              | Tom Thumb                              | Pal, George                    | George Pal          | tt0052427 |
| 1746578801 | 1961 | 1961 | Come September                         | Come September                         | Mulligan, Robert               | Robert Mulligan     | tt0054759 |
| 1746567246 | 1933 | 1933 | The Gallant Fool                       | The Gallant Fool                       | Bradbury, Robert N.            | Robert N. Bradbury  | tt0024045 |
| 1746454016 | 1941 | 1941 | Belle Starr                            | Belle Starr                            | Cummings, Irving               | Irving Cummings     | tt0033383 |
| 1746583510 | 1930 | 1930 | Divorce Among Friends                  | Divorce Among Friends                  | Del Ruth, Roy                  | Roy Del Ruth        | tt0020826 |
| 1746455109 | 2000 | 2000 | Bedazzled                              | Bedazzled                              | Ramis, Harold                  | Harold Ramis        | tt0230030 |
| 1746508444 | 1926 | 1926 | Made for Love                          | Made for Love                          | Sloane, Paul                   | Paul Sloane         | tt0017100 |
| 1746514410 | 1916 | 1916 | The Vagabond Prince                    | The Vagabond Prince                    | Giblyn, Charles                | Charles Giblyn      | tt0007506 |
| 1746475930 | 1946 | 1946 | Cowboy Blues                           | Cowboy Blues                           | Nazarro, Ray                   | Ray Nazarro         | tt0038428 |
| 1746570891 | 1935 | 1935 | The Scoundrel                          | The Scoundrel                          | Hecht, Ben; MacArthur, Charles | Ben Hecht           | tt0026970 |
| 1746409462 | 1991 | 1991 | Suburban Commando                      | Suburban Commando                      | Kennedy, Burt                  | Burt Kennedy        | tt0103003 |
| 1745340100 | 2003 | 2002 | The Secret Lives of Dentists           | The Secret Lives of Dentists           | Rudolph, Alan                  | Alan Rudolph        | tt0314630 |
| 1746436055 | 1941 | 1941 | Unexpected Uncle                       | Unexpected Uncle                       | Godfrey, Peter                 | Peter Godfrey       | tt0034339 |
| 1746491765 | 1946 | 1946 | Rainbow Over Texas                     | Rainbow Over Texas                     | McDonald, Frank                | Frank McDonald      | tt0038869 |
| 1746500851 | 1915 | 1915 | Just Jim                               | Just Jim                               | Lund, O. A. C.                 | O.A.C. Lund         | tt0005581 |
| 1746507887 | 1925 | 1925 | The Rip Snorter                        | The Rip Snorter                        | Hayes, Ward                    | Ward Hayes          | tt0156965 |
| 1746500179 | 1949 | 1949 | Lust for Gold                          | Lust for Gold                          | Simon, S. Sylvan               | S. Sylvan Simon     | tt0041610 |
| 1746577158 | 1961 | 1961 | Ada                                    | Ada                                    | Mann, Daniel                   | Daniel Mann         | tt0054601 |
| 1769970389 | 1965 | 1965 | The Sweet Smell of Sex                 | Sweet Smell of Sex                     | Downey, Robert                 | Robert Downey Sr.   | tt0259014 |
| 1746584518 | 1929 | 1929 | Gold Diggers of Broadway               | Gold Diggers of Broadway               | Del Ruth, Roy                  | Roy Del Ruth        | tt0019936 |
| 1746560120 | 1965 | 1965 | Genghis Khan                           | Genghis Khan                           | Levin, Henry                   | Henry Levin         | tt0059219 |
| 1746580486 | 1937 | 1937 | The Devil Is Driving                   | The Devil Is Driving                   | Lachman, Harry                 | Harry Lachman       | tt0028782 |
| 1746582355 | 1930 | 1930 | Rough Waters                           | Rough Waters                           | Daumery, John                  | John Daumery        | tt0021320 |
| 1746584119 | 1936 | 1936 | Doughnuts and Society                  | Doughnuts and Society                  | Collins, Lewis D.              | Lewis D. Collins    | tt0027541 |
| 1746561541 | 1954 | 1954 | Broken Lance                           | Broken Lance                           | Dmytryk, Edward                | Edward Dmytryk      | tt0046808 |
| 1746423472 | 1996 | 1996 | Harriet the Spy                        | Harriet the Spy                        | Hughes, Bronwen                | Bronwen Hughes      | tt0116493 |
| 1746453477 | 1941 | 1941 | Flying Wild                            | Flying Wild                            | West, William                  | William West        | tt0033613 |
| 1746499937 | 1946 | 1946 | The Bachelor's Daughters               | The Bachelor's Daughters               | Stone, Andrew                  | Andrew L. Stone     | tt0039168 |
| 1746581300 | 1910 | 1910 | In the Serpent's Power                 | In the Serpent's Power                 |                                | Frank Beal          | tt0352437 |
| 1746582821 | 1938 | 1938 | Two Gun Man from Harlem                | Two Gun Man from Harlem                | Kahn, Richard C.               | Richard C. Kahn     | tt0135694 |
| 1746233778 | 1967 | 1967 | Exposure!                              | Exposure                               |                                | Joel L. Freedman    | tt0221161 |
| 1746584629 | 1929 | 1929 | Careers                                | Careers                                | Dillon, John Francis           | John Francis Dillon | tt0019751 |
| 1746574565 | 1933 | 1933 | Rainbow Ranch                          | Rainbow Ranch                          | Fraser, Harry                  | Harry L. Fraser     | tt0132461 |
| 1746419806 | 1987 | 1987 | Zombie High                            | Zombie High                            | Link, Ron                      | Ron Link            | tt0094383 |
| 1746487926 | 1917 | 1917 | Sister Against Sister                  | Sister Against Sister                  | Vincent, James R.              | James Vincent       | tt0008580 |
| 1746584991 | 1940 | 1940 | The Ramparts We Watch                  | The Ramparts We Watch                  | Rochemont, Louis de            | Louis De Rochemont  | tt0032968 |
| 1746454240 | 2000 | 2000 | Bring It On                            | Bring It On                            | Reed, Peyton                   | Peyton Reed         | tt0204946 |
| 1746409131 | 1982 | 1982 | An Officer and a Gentleman             | An Officer and a Gentleman             | Hackford, Taylor               | Taylor Hackford     | tt0084434 |
| 1746501186 | 1916 | 1916 | Then I'll Come Back to You             | Then I'll Come Back to You             | Irving, George                 | George Irving       | tt0007445 |

|                   |             |             |                                    |                                    |                                          |                         |                  |
|-------------------|-------------|-------------|------------------------------------|------------------------------------|------------------------------------------|-------------------------|------------------|
| 1746424054        | 1941        | 1941        | Thunder over the Prairie           | Thunder Over the Prairie           | Hillyer, Lambert                         | Lambert Hillyer         | tt0034289        |
| 1746465189        | 1942        | 1942        | Broadway                           | Broadway                           | Seiter, William A.                       | William A. Seiter       | tt0034549        |
| 1746513124        | 1916        | 1916        | If My Country Should Call          | If My Country Should Call          | De Grasse, Joseph                        | Joseph De Grasse        | tt0006847        |
| 1746585211        | 1928        | 1928        | The Gun Runner                     | The Gun Runner                     | Lewis, Edgar                             | Edgar Lewis             | tt0018965        |
| 1746555802        | 1955        | 1955        | The Silver Star                    | The Silver Star                    | Bartlett, Richard                        | Richard Bartlett        | tt0048619        |
| 1746584621        | 1929        | 1929        | Dark Streets                       | Dark Streets                       | Lloyd, Frank                             | Frank Lloyd             | tt0019805        |
| 1746454083        | 1944        | 1944        | Address Unknown                    | Address Unknown                    | Menzies, William Cameron                 | William Cameron Menzies | tt0036581        |
| 1746520365        | 1925        | 1925        | Counsel for the Defense            | Counsel for the Defense            | King, Burton                             | Burton L. King          | tt0015707        |
| 1746516055        | 1921        | 1921        | West of the Rio Grande             | West of the Rio Grande             | Townley, Robert H.                       | Robin H. Townley        | tt0177376        |
| 1746504586        | 1918        | 1918        | Winning Grandma                    | Winning Grandma                    | Bertram, William                         | William Bertram         | tt0190151        |
| 1746574204        | 1957        | 1957        | The Bridge on the River Kwai       | The Bridge on the River Kwai       | Lean, David                              | David Lean              | tt0050212        |
| 1746533217        | 1915        | 1915        | The Stolen Voice                   | The Stolen Voice                   | Crane, Frank H.                          | Frank Hall Crane        | tt0006101        |
| 1746581332        | 1951        | 1951        | Storm Warning                      | Storm Warning                      | Heisler, Stuart                          | Stuart Heisler          | tt0044075        |
| 1746583667        | 1930        | 1930        | The Furies                         | The Furies                         | Crosland, Alan                           | Alan Crosland           | tt0020910        |
| 1746500459        | 1924        | 1924        | Sandra                             | Sandra                             | Sawyer, Arthur H.; Campbell, Webster     | Arthur H. Sawyer        | tt0015302        |
| 1746584519        | 1929        | 1929        | The Mysterious Dr. Fu Manchu       | The Mysterious Dr. Fu Manchu       | Lee, Rowland V.                          | Rowland V. Lee          | tt0020197        |
| 1746583335        | 1930        | 1930        | Min and Bill                       | Min and Bill                       | Hill, George                             | George W. Hill          | tt0021148        |
| <b>1746566261</b> | <b>1957</b> | <b>1957</b> | <b>The Garment Jungle</b>          | <b>The Garment Jungle</b>          | <b>Sherman, Vincent; Aldrich, Robert</b> | <b>Vincent Sherman</b>  | <b>tt0050424</b> |
| 1746508240        | 1924        | 1924        | Riders Up                          | Riders Up                          | Cummings, Irving                         | Irving Cummings         | tt0015276        |
| 1745359955        | 2010        | 2010        | Black Swan                         | Black Swan                         | Aronofsky, Darren                        | Darren Aronofsky        | tt0947798        |
| 1746219110        | 1976        | 1976        | The Missouri Breaks                | The Missouri Breaks                | Penn, Arthur                             | Arthur Penn             | tt0074906        |
| 1746577755        | 1936        | 1936        | Charlie Chan at the Circus         | Charlie Chan at the Circus         | Lachman, Harry                           | Harry Lachman           | tt0027439        |
| 1746530687        | 1950        | 1950        | The Torch                          | The Torch                          | Fernández, Emilio                        | Emilio Fernández        | tt0041971        |
| 1746566138        | 1958        | 1958        | Cole Younger, Gunfighter           | Cole Younger, Gunfighter           | Springsteen, R. G.                       | R.G. Springsteen        | tt0051482        |
| 1746509298        | 1925        | 1925        | Lena Rivers                        | Lena Rivers                        | Bennett, Whitman                         | Whitman Bennett         | tt0127648        |
| 1746464825        | 1945        | 1945        | The Strange Affair of Uncle Harry  | The Strange Affair of Uncle Harry  | Siodmak, Robert                          | Robert Siodmak          | tt0038123        |
| 1746565945        | 1957        | 1956        | Written on the Wind                | Written on the Wind                | Sirk, Douglas                            | Douglas Sirk            | tt0049966        |
| 1745374325        | 2003        | 2003        | The Real Cancun                    | The Real Cancun                    | De Oliveira, Rick                        | Rick de Oliveira        | tt0360916        |
| 1746524874        | 1915        | 1915        | At Bay                             | At Bay                             | Fitzmaurice, George                      | George Fitzmaurice      | tt0004919        |
| 1746520372        | 1949        | 1949        | Bad Boy                            | Bad Boy                            | Neumann, Kurt                            | Kurt Neumann            | tt0041144        |
| 1746211079        | 1972        | 1972        | The Poseidon Adventure             | The Poseidon Adventure             | Neame, Ronald                            | Ronald Neame            | tt0069113        |
| 1745395113        | 2009        | 2009        | Hannah Montana: The Movie          | Hannah Montana: The Movie          | Chelsom, Peter                           | Peter Chelsom           | tt1114677        |
| 1746474971        | 1945        | 1945        | Snafu                              | Snafu                              | Moss, Jack                               | Jack Moss               | tt0038957        |
| 1746408521        | 1988        | 1988        | The Wrong Guys                     | The Wrong Guys                     | Bilson, Danny                            | Danny Bilson            | tt0096466        |
| <b>1746549944</b> | <b>1955</b> | <b>1955</b> | <b>Bengazi</b>                     | <b>Bengazi</b>                     | <b>Brahm, John</b>                       | <b>John Brahm</b>       | <b>tt0047872</b> |
| 1746577475        | 1960        | 1960        | Too Soon to Love                   | Too Soon to Love                   | Rush, Richard                            | Richard Rush            | tt0054392        |
| 1746525008        | 1915        | 1915        | Fatherhood                         | Fatherhood                         | Bosworth, Hobart                         | Hobart Bosworth         | tt0005308        |
| 1746520248        | 1924        | 1924        | Sherlock Jr.                       | Sherlock Jr.                       | Keaton, Buster                           | Buster Keaton           | tt0015324        |
| 1746492222        | 1948        | 1948        | The Fight Never Ends               | The Fight Never Ends               | Lerner, Joe                              | Joseph Lerner           | tt0041359        |
| 1746581772        | 1929        | 1929        | Thunder                            | Thunder                            | Nigh, William                            | William Nigh            | tt0020498        |
| 1746496232        | 1917        | 1917        | The Bronze Bride                   | The Bronze Bride                   | McRae, Henry                             | Henry MacRae            | tt0007753        |
| 1746553589        | 1965        | 1965        | That Funny Feeling                 | That Funny Feeling                 | Thorpe, Richard                          | Richard Thorpe          | tt0059794        |
| 1745372892        | 2009        | 2009        | The Invention of Lying             | The Invention of Lying             | Gervais, Ricky ; Robinson, Matthew       | Ricky Gervais           | tt1058017        |
| 1746514608        | 1915        | 1915        | Marse Covington                    | Marse Covington                    | Carewe, Edwin                            | Edwin Carewe            | tt0005717        |
| 1746485524        | 1918        | 1918        | The Dream Lady                     | The Dream Lady                     | Wilson, Elsie Jane                       | Elsie Jane Wilson       | tt0009026        |
| 1746553703        | 1964        | 1964        | The Last Man on Earth              | The Last Man on Earth              | Salkow, Sidney                           | Ubaldo Ragona           | tt0058700        |
| 1746570580        | 1953        | 1952        | April in Paris                     | April in Paris                     | Butler, David                            | David Butler            | tt0044370        |
| 1746574546        | 1935        | 1935        | The Cowboy Millionaire             | The Cowboy Millionaire             | Cline, Edward F.                         | Edward F. Cline         | tt0026242        |
| 1745340092        | 2002        | 2002        | Auto Focus                         | Auto Focus                         | Schrader, Paul                           | Paul Schrader           | tt0298744        |
| 1745293190        | 2005        | 2004        | David Hockney: The Colors of Music | David Hockney: The Colors of Music | Kavaliiauskas, Maryte ; Schneidman, 'M   | Maryte Kavaliiauskas    | tt0424935        |
| 1746516090        | 1922        | 1922        | One Moment's Temptation            | One Moment's Temptation            | Rooke, A. J.                             | Arthur Rooke            | tt0013460        |
| 1746485825        | 1918        | 1918        | The Bride's Awakening              | The Bride's Awakening              | Leonard, Robert Z.                       | Robert Z. Leonard       | tt0008927        |
| 1746497578        | 1918        | 1918        | Vive La France!                    | Vive la France!                    | Neill, R. William                        | Roy William Neill       | tt0009766        |
| 1746503639        | 1918        | 1918        | Hugon, the Mighty                  | Hugon, the Mighty                  | Sturgeon, Rollin S.                      | Rollin S. Sturgeon      | tt0009210        |
| 1746454438        | 1995        | 1995        | Restoration                        | Restoration                        | Hoffman, Michael                         | Michael Hoffman         | tt0114272        |
| 1746393654        | 1981        | 1980        | Caboblanco                         | Caboblanco                         | Thompson, J. Lee                         | J. Lee Thompson         | tt0080485        |
| 1746410579        | 1984        | 1984        | Streets of Fire                    | Streets of Fire                    | Hill, Walter                             | Walter Hill             | tt0088194        |

1

1

|            |      |      |                                    |                                    |                                 |                       |           |
|------------|------|------|------------------------------------|------------------------------------|---------------------------------|-----------------------|-----------|
| 1746492579 | 1944 | 1944 | That's My Baby                     | That's My Baby!                    | Berke, William                  | William Berke         | tt0037361 |
| 1746507775 | 1925 | 1925 | If Marriage Fails                  | If Marriage Fails                  | Ince, John                      | John Ince             | tt0015940 |
| 1746210831 | 1972 | 1972 | The Legend of Boggy Creek          | The Legend of Boggy Creek          | Pierce, Charles B.              | Charles B. Pierce     | tt0068837 |
| 1769970539 | 1967 | 1967 | Depraved!                          | Depraved!                          | Milligan, Andy                  | Andy Milligan         | tt0216681 |
| 1746475709 | 1948 | 1948 | The Big Clock                      | The Big Clock                      | Farrow, John                    | John Farrow           | tt0040160 |
| 1746583561 | 1931 | 1931 | The Champ                          | The Champ                          | Vidor, King                     | King Vidor            | tt0021730 |
| 1746507595 | 1949 | 1949 | Big Jack                           | Big Jack                           | Thorpe, Richard                 | Richard Thorpe        | tt0041176 |
| 1746585469 | 1939 | 1939 | Bad Little Angel                   | Bad Little Angel                   | Thiele, William                 | Wilhelm Thiele        | tt0031072 |
| 1746561811 | 1957 | 1956 | Rock, Pretty Baby                  | Rock, Pretty Baby                  | Bartlett, Richard               | Richard Bartlett      | tt0049683 |
| 1746524179 | 1915 | 1915 | The Pretty Sister of Jose          | The Pretty Sister of Jose          | Dwan, Allan                     | Allan Dwan            | tt0005922 |
| 1746554085 | 1963 | 1963 | The Birds                          | The Birds                          | Hitchcock, Alfred               | Alfred Hitchcock      | tt0056869 |
| 1746545138 | 1940 | 1940 | Billy the Kid Outlawed             | Billy the Kid Outlawed             | Stewart, Peter                  | Sam Newfield          | tt0162197 |
| 1746585279 | 1930 | 1930 | Way Out West                       | Way Out West                       | Niblo, Fred                     | Fred Niblo            | tt0021533 |
| 1746392961 | 1985 | 1984 | Ghoulies                           | Ghoulies                           | Bercovici, Luca                 | Luca Bercovici        | tt0089200 |
| 1746438610 | 1942 | 1942 | The Bugle Sounds                   | The Bugle Sounds                   | Simon, S. Sylvan                | S. Sylvan Simon       | tt0033438 |
| 1745309157 | 2005 | 2005 | Guess Who                          | Guess Who                          | Sullivan, Kevin Rodney          | Kevin Rodney Sullivan | tt0372237 |
| 1746561172 | 1932 | 1932 | The Expert                         | The Expert                         | Mayo, Archie                    | Archie Mayo           | tt0022864 |
| 1746453841 | 1941 | 1941 | A Shot in the Dark                 | A Shot in the Dark                 | McGann, William                 | William C. McGann     | tt0034185 |
| 1746583968 | 1939 | 1939 | Wall Street Cowboy                 | Wall Street Cowboy                 | Kane, Joseph                    | Joseph Kane           | tt0032107 |
| 1746258003 | 1980 | 1980 | Stardust Memories                  | Stardust Memories                  | Allen, Woody                    | Woody Allen           | tt0081554 |
| 1746492092 | 1947 | 1947 | Michigan Kid                       | The Michigan Kid                   | Taylor, Ray                     | Ray Taylor            | tt0039622 |
| 1746562334 | 1955 | 1955 | The View from Pompey's Head        | The View from Pompey's Head        | Dunne, Philip                   | Philip Dunne          | tt0048788 |
| 1746573337 | 1932 | 1932 | Hell's Highway                     | Hell's Highway                     | Brown, Rowland                  | Rowland Brown         | tt0022990 |
| 1745340252 | 2002 | 2002 | Heaven                             | Heaven                             | Tykwer, Tom                     | Tom Tykwer            | tt0246677 |
| 1746393777 | 1985 | 1985 | Just One of the Guys               | Just One of the Guys               | Gottlieb, Lisa                  | Lisa Gottlieb         | tt0089393 |
| 1746578041 | 1935 | 1935 | Hitch Hike Lady                    | Hitch Hike Lady                    | Scotto, Aubrey                  | Aubrey Scotto         | tt0027750 |
| 1745341452 | 2009 | 2009 | The Slammin' Salmon                | The Slammin' Salmon                | Heffernan, Kevin                | Kevin Heffernan       | tt1135525 |
| 1746508403 | 1924 | 1924 | The Last White Man                 | The Last White Man                 | Mattison, Frank S.              | Frank S. Mattison     | tt0030547 |
| 1746584745 | 1930 | 1930 | Big Money                          | Big Money                          | Mack, Russell                   | Russell Mack          | tt0020688 |
| 1746562102 | 1953 | 1953 | Jeopardy                           | Jeopardy                           | Sturges, John                   | John Sturges          | tt0045932 |
| 1746514259 | 1915 | 1915 | The Politicians                    | The Politicians                    | Angeles, Bert                   | Bert Angeles          | tt0005908 |
| 1746418506 | 1940 | 1940 | My Love Came Back                  | My Love Came Back                  | Bernhardt, Kurt                 | Curtis Bernhardt      | tt0032829 |
| 1746439708 | 1998 | 1997 | George B                           | George B.                          | Lea, Eric                       | Eric Lea              | tt0119188 |
| 1746492728 | 1944 | 1944 | The Mummy's Ghost                  | The Mummy's Ghost                  | LeBorg, Reginald                | Reginald Le Borg      | tt0037099 |
| 1746436033 | 1943 | 1943 | The Fighting Buckaroo              | The Fighting Buckaroo              | Berke, William                  | William Berke         | tt0177770 |
| 1746495792 | 1920 | 1920 | Risky Business                     | Risky Business                     | Harris, Harry; Sturgeon, Rollin | Harry B. Harris       | tt0011631 |
| 1746584264 | 1936 | 1936 | The Murder of Dr. Harrigan         | The Murder of Dr. Harrigan         | McDonald, Frank                 | Frank McDonald        | tt0028002 |
| 1746583610 | 1931 | 1931 | Desert Vengeance                   | Desert Vengeance                   | King, Louis                     | Louis King            | tt0021795 |
| 1746523479 | 1923 | 1922 | The Power of a Lie                 | The Power of a Lie                 | Archainbaud, George             | George Archainbaud    | tt0013507 |
| 1746573875 | 1958 | 1958 | Life Begins at 17                  | Life Begins at 17                  | Dreifuss, Arthur                | Arthur Dreifuss       | tt0051862 |
| 1746554741 | 1964 | 1964 | Circus World                       | Circus World                       | Hathaway, Henry                 | Henry Hathaway        | tt0057952 |
| 1746235278 | 1973 | 1973 | Wicked, Wicked                     | Wicked, Wicked                     | Bare, Richard L.                | Richard L. Bare       | tt0070916 |
| 1746563664 | 1952 | 1951 | Decision Before Dawn               | Decision Before Dawn               | Litvak, Anatole                 | Anatole Litvak        | tt0043459 |
| 1746421184 | 1990 | 1990 | Teenage Mutant Ninja Turtles       | Teenage Mutant Ninja Turtles       | Barron, Steve                   | Steve Barron          | tt0100758 |
| 1746574647 | 1937 | 1937 | Borderland                         | Borderland                         | Watt, Nate                      | Nate Watt             | tt0028650 |
| 1746509054 | 1925 | 1925 | The Keeper of the Bees             | The Keeper of the Bees             | Meehan, James Leo               | James Leo Meehan      | tt0015972 |
| 1746496237 | 1920 | 1920 | The Dancin' Fool                   | The Dancin' Fool                   | Wood, Sam                       | Sam Wood              | tt0011089 |
| 1746198130 | 1966 | 1966 | 10:30 P.M. Summer                  | 10:30 P.M. Summer                  | Dassin, Jules                   | Jules Dassin          | tt0060045 |
| 1746497259 | 1919 | 1919 | The Challenge of Chance            | The Challenge of Chance            | Revier, Harry                   | Harry Revier          | tt0009997 |
| 1746582587 | 1938 | 1938 | Up the River                       | Up the River                       | Werker, Alfred                  | Alfred L. Werker      | tt0030920 |
| 1746580225 | 1935 | 1935 | Too Tough to Kill                  | Too Tough to Kill                  | Lederman, D. Ross               | D. Ross Lederman      | tt0027122 |
| 1746491807 | 1946 | 1946 | Hot Cargo                          | Hot Cargo                          | Landers, Lew                    | Lew Landers           | tt0038618 |
| 1746580388 | 1938 | 1938 | Girls' School                      | Girls' School                      | Brahm, John                     | John Brahm            | tt0030184 |
| 1746504610 | 1921 | 1920 | The Witch's Lure                   | Witch's Lure                       |                                 | Nat G. Deverich       | tt0203207 |
| 1746585309 | 1929 | 1929 | This Is Heaven                     | This Is Heaven                     | Santell, Alfred                 | Alfred Santell        | tt0020493 |
| 1745374772 | 2008 | 2008 | High School Musical 3: Senior Year | High School Musical 3: Senior Year | Ortega, Kenny                   | Kenny Ortega          | tt0962726 |
| 1746574390 | 1961 | 1961 | The Second Time Around             | The Second Time Around             | Sherman, Vincent                | Vincent Sherman       | tt0055421 |

|            |      |      |                                                   |                                               |                                  |                                     |           |
|------------|------|------|---------------------------------------------------|-----------------------------------------------|----------------------------------|-------------------------------------|-----------|
| 1746500700 | 1925 | 1925 | Paint and Powder                                  | Paint and Powder                              |                                  | Hunt Stromberg                      | tt0016195 |
| 1746473672 | 1946 | 1946 | Song of the Sierras                               | Song of the Sierras                           | Drake, Oliver                    | Oliver Drake                        | tt0281208 |
| 1746584738 | 1930 | 1930 | Roadhouse Nights                                  | Roadhouse Nights                              | Henley, Hobart                   | Hobart Henley                       | tt0021305 |
| 1746503898 | 1919 | 1919 | Thou Shalt Not                                    | Thou Shalt Not                                | Brabin, Charles J.               | Charles Brabin                      | tt0010773 |
| 1746515067 | 1920 | 1920 | The Fear Market                                   | The Fear Market                               | Webb, Kenneth                    | Kenneth S. Webb                     | tt0011177 |
| 1746434616 | 1999 | 1999 | Mr. Death: The Rise and Fall of Fred A. Leuchter, | Mr. Death: The Rise and Fall of Fred A. Leuch | Morris, Errol                    | Errol Morris                        | tt0192335 |
| 1746514661 | 1915 | 1915 | Pearls of Temptation                              | Pearls of Temptation                          |                                  |                                     | tt0005877 |
| 1746422512 | 1994 | 1994 | Blankman                                          | Blankman                                      | Binder, Mike                     | Mike Binder                         | tt0109288 |
| 1746501117 | 1916 | 1916 | The Innocent Lie                                  | The Innocent Lie                              | Olcott, Sidney                   | Sidney Olcott                       | tt0006860 |
| 1746520955 | 1948 | 1948 | When My Baby Smiles at Me                         | When My Baby Smiles at Me                     | Lang, Walter                     | Walter Lang                         | tt0040962 |
| 1746419195 | 1987 | 1987 | The Believers                                     | The Believers                                 | Schlesinger, John                | John Schlesinger                    | tt0092632 |
| 1746580329 | 1935 | 1935 | The Informer                                      | The Informer                                  | Ford, John                       | John Ford                           | tt0026529 |
| 1745340503 | 2004 | 2004 | You Got Served                                    | You Got Served                                | Stokes, Christopher B.           | Chris Stokes                        | tt0365957 |
| 1746508118 | 1926 | 1926 | Flame of the Argentine                            | Flame of the Argentine                        | Dillon, Edward                   | Edward Dillon                       | tt0016877 |
| 1746566504 | 1933 | 1932 | Robbers' Roost                                    | Robbers' Roost                                | King, Louis                      | David Howard                        | tt0024505 |
| 1745341250 | 2010 | 2010 | Just Wright                                       | Just Wright                                   | Hamri, Sanaa                     | Sanaa Hamri                         | tt1407061 |
| 1746582086 | 1929 | 1929 | Taming of the Shrew                               | The Taming of the Shrew                       | Taylor, Sam                      | Sam Taylor                          | tt0020479 |
| 1746581093 | 1951 | 1951 | The Lady and the Bandit                           | The Lady and the Bandit                       | Murphy, Ralph                    | Ralph Murphy                        | tt0043722 |
| 1746571698 | 1910 | 1910 | The Debt Repaid                                   | The Debt Repaid                               |                                  | William F. Haddock                  | tt2236908 |
| 1746496578 | 1918 | 1918 | Back to the Woods                                 | Back to the Woods                             | Irving, George                   | George Irving                       | tt0008861 |
| 1746465222 | 1945 | 1945 | First Yank into Tokyo                             | First Yank Into Tokyo                         | Douglas, Gordon                  | Gordon Douglas                      | tt0037701 |
| 1746473650 | 1944 | 1944 | West of the Rio Grande                            | West of the Rio Grande                        | Hillyer, Lambert                 | Lambert Hillyer                     | tt0037454 |
| 1746508870 | 1926 | 1926 | The Devil's Circus                                | The Devil's Circus                            | Christensen, Benjamin            | Benjamin Christensen                | tt0016783 |
| 1745271882 | 2001 | 2001 | Behind Enemy Lines                                | Behind Enemy Lines                            | Moore, John                      | John Moore                          | tt0159273 |
| 1746584839 | 1930 | 1930 | The Cohens and the Kellys in Scotland             | The Cohens and the Kellys in Scotland         | Craft, William James             | William James Craft                 | tt0020777 |
| 1746520871 | 1925 | 1925 | Drug Store Cowboy                                 | The Drug Store Cowboy                         | Frame, Park                      | Park Frame                          | tt0015766 |
| 1746422528 | 1994 | 1994 | The Ref                                           | The Ref                                       | Demme, Ted                       | Ted Demme                           | tt0110955 |
| 1746420917 | 1940 | 1940 | Bitter Sweet                                      | Bitter Sweet                                  | Van Dyke, W. S.                  | W.S. Van Dyke                       | tt0032256 |
| 1746580404 | 1938 | 1938 | Hold That Kiss                                    | Hold That Kiss                                | Marin, Edwin L.                  | Edwin L. Marin                      | tt0030240 |
| 1746569938 | 1957 | 1957 | The Three Faces of Eve                            | The Three Faces of Eve                        | Johnson, Nunnally                | Nunnally Johnson                    | tt0051077 |
| 1745293444 | 2006 | 2006 | John Tucker Must Die                              | John Tucker Must Die                          | Thomas, Betty                    | Betty Thomas                        | tt0455967 |
| 1746524442 | 1910 | 1910 | Method in His Madness                             | Method in His Madness                         |                                  | Gilbert M. 'Broncho Billy' Anderson | tt0372421 |
| 1745293972 | 2007 | 2007 | Perfect Stranger                                  | Perfect Stranger                              | Foley, James                     | James Foley                         | tt0457433 |
| 1746503680 | 1918 | 1918 | Leap to Fame                                      | Leap to Fame                                  | Blackwell, Carlyle               | Carlyle Blackwell                   | tt0009283 |
| 1746501298 | 1915 | 1915 | A Royal Family                                    | A Royal Family                                | Nigh, William                    | William Nigh                        | tt0005983 |
| 1746464852 | 1942 | 1941 | Fighting Bill Fargo                               | Fighting Bill Fargo                           | Taylor, Ray                      | Ray Taylor                          | tt0033601 |
| 1746235265 | 1976 | 1975 | Winterhawk                                        | Winterhawk                                    | Pierce, Charles B.               | Charles B. Pierce                   | tt0075432 |
| 1746572467 | 1931 | 1931 | Range Law                                         | Range Law                                     | Rosen, Phil                      | Phil Rosen                          | tt0022294 |
| 1746583987 | 1936 | 1936 | Here Comes Trouble                                | Here Comes Trouble                            | Seiler, Lewis                    | Lewis Seiler                        | tt0027736 |
| 1746216713 | 1969 | 1969 | Midnight Cowboy                                   | Midnight Cowboy                               | Schlesinger, John                | John Schlesinger                    | tt0064665 |
| 1746516042 | 1921 | 1921 | Little Lord Fauntleroy                            | Little Lord Fauntleroy                        | Green, Alfred E.; Pickford, Jack | Alfred E. Green                     | tt0012397 |
| 1746582214 | 1928 | 1928 | Wickedness Preferred                              | Wickedness Preferred                          | Henley, Hobart                   | Hobart Henley                       | tt0019578 |
| 1746198529 | 1967 | 1967 | The Legend of the Boy and the Eagle               | The Legend of the Boy and the Eagle           | Couffer, Jack                    | Jack Couffer                        | tt0061904 |
| 1746584527 | 1930 | 1930 | Young Man of Manhattan                            | Young Man of Manhattan                        | Bell, Monta                      | Monta Bell                          | tt0021568 |
| 1745293804 | 2007 | 2007 | Oswald's Ghost                                    | Oswald's Ghost                                | Stone, Robert                    | Robert Stone                        | tt0938321 |
| 1746453590 | 1943 | 1943 | He Hired the Boss                                 | He Hired the Boss                             | Loring, Thomas Z.                | Thomas Z. Loring                    | tt0035974 |
| 1746423351 | 1996 | 1996 | Caught                                            | Caught                                        | Young, Robert M.                 | Robert M. Young                     | tt0115847 |
| 1746438615 | 1943 | 1943 | Captive Wild Woman                                | Captive Wild Woman                            | Dmytryk, Edward                  | Edward Dmytryk                      | tt0035713 |
| 1769969699 | 1911 | 1911 | The Portrait                                      | The Portrait                                  |                                  | Thomas H. Ince                      | tt0358646 |
| 1746513070 | 1927 | 1927 | Finnegan's Ball                                   | Finnegan's Ball                               | Hogan, James P.                  | James P. Hogan                      | tt0017884 |
| 1746569523 | 1957 | 1957 | Portland Exposé                                   | Portland Exposé                               | Schuster, Harold                 | Harold D. Schuster                  | tt0124076 |
| 1745340452 | 2002 | 2002 | Equilibrium                                       | Equilibrium                                   | Wimmer, Kurt                     | Kurt Wimmer                         | tt0238380 |
| 1746584312 | 1936 | 1936 | Dangerous Waters                                  | Dangerous Waters                              | Hillyer, Lambert                 | Lambert Hillyer                     | tt0027498 |
| 1746577691 | 1933 | 1933 | The Barbarian                                     | The Barbarian                                 | Wood, Sam                        | Sam Wood                            | tt0023778 |
| 1746567810 | 1952 | 1952 | California Conquest                               | California Conquest                           | Landers, Lew                     | Lew Landers                         | tt0044466 |
| 1769970419 | 1967 | 1967 | Bachelor's Dream                                  | The Bachelor's Dreams                         |                                  | Stephen C. Apostolof                | tt0123398 |
| 1745358879 | 2002 | 2002 | Kung Pow: Enter the Fist                          | Kung Pow: Enter the Fist                      | Oedeker, Steve                   | Steve Oedeker                       | tt0240468 |



|            |      |      |                                         |                                         |                                       |                      |           |
|------------|------|------|-----------------------------------------|-----------------------------------------|---------------------------------------|----------------------|-----------|
| 1746409500 | 1981 | 1981 | Endless Love                            | Endless Love                            | Zeffirelli, Franco                    | Franco Zeffirelli    | tt0082329 |
| 1746574202 | 1956 | 1956 | Ransom!                                 | Ransom!                                 | Segal, Alex                           | Alex Segal           | tt0049656 |
| 1746523216 | 1917 | 1917 | The Girl Without a Soul                 | The Girl Without a Soul                 | Collins, John H.                      | John H. Collins      | tt0008004 |
| 1746503252 | 1918 | 1918 | Me Und Gott                             | Me und Gott                             | Gittens, Wyndham                      | Wyndham Gittens      | tt0186338 |
| 1746582469 | 1938 | 1938 | Mr. Boggs Steps Out                     | Mr. Boggs Steps Out                     | Wiles, Gordon                         | Gordon Wiles         | tt0029266 |
| 1746514452 | 1923 | 1923 | Scarred Hands                           | Scarred Hands                           | Smith, Cliff                          | Clifford Smith       | tt0014443 |
| 1746503451 | 1922 | 1922 | Living Lies                             | Living Lies                             | Chautard, Emile                       | Emile Chautard       | tt0013325 |
| 1746513408 | 1922 | 1922 | Guilty                                  | Guilty                                  |                                       | Ranger Bill Miller   | tt0361680 |
| 1746502412 | 1916 | 1916 | The Little Girl Next Door               | The Little Girl Next Door               | Baker, Richard Foster; Coan, M. Blair | Richard Foster Baker | tt0163061 |
| 1746533224 | 1916 | 1916 | Indiana                                 | The Indian                              | Beal, Frank                           | David Miles          | tt0483414 |
| 1769974357 | 1916 | 1916 | The Wraith of Haddon Towers             | The Wraith of Haddon Towers             |                                       | Arthur Maude         | tt0437649 |
| 1746514681 | 1916 | 1916 | The Fable of the Two Philanthropic Sons | The Fable of the Two Philanthropic Sons |                                       | Richard Foster Baker | tt0006659 |
| 1746502555 | 1915 | 1915 | The Daughter of the People              | The Daughter of the People              | Dawley, J. Searle                     | J. Searle Dawley     | tt0005176 |
| 1769970840 | 1915 | 1915 | Is Christmas a Bore?                    | Is Christmas a Bore?                    | Drew, Sidney                          | Sidney Drew          | tt0154652 |
| 1746513790 | 1915 | 1915 | Pool Sharks                             | Pool Sharks                             | Middleton, Edwin                      | Edwin Middleton      | tt0005910 |
| 1746532646 | 1914 | 1914 | The Policewoman                         | The Policewoman                         |                                       |                      | tt0177121 |
| 1746512410 | 1913 | 1913 | The Seed of the Fathers                 | The Seed of the Fathers                 | Taylor, S. E. V.                      | Stanner E.V. Taylor  | tt0003363 |
| 1746184138 | 1910 | 1910 | Across the Plains                       | Across the Plains                       | Boggs, Frank                          | Francis Boggs        | tt0001102 |
| 1746394032 | 1983 | 1983 | Anarchism in America?                   | Anarchism in America                    | Sucher, Joel; Fischler, Steven        | Steven Fischler      | tt0186820 |
| 1746248877 | 1980 | 1980 | Today Is for the Championship           | Today Is for the Championship           | Weisburd, Dan                         | Dan E. Weisburd      | tt0365849 |
| 1745341025 | 2002 | 2002 | I Don't Know Jack                       | I Don't Know Jack                       | Leavens, Chris                        | Chris Leavens        | tt0292553 |
| 1746578944 | 1951 | 1951 | Abilene Trail                           | Abilene Trail                           | Collins, Lewis                        | Lewis D. Collins     | tt0043257 |
| 1746578799 | 1950 | 1950 | Vienna Art Treasures                    | Vienna Art Treasures                    |                                       |                      | tt0335524 |
| 1746578646 | 1950 | 1950 | Stella                                  | Stella                                  | Binyon, Claude                        | Claude Binyon        | tt0043000 |
| 1746508073 | 1949 | 1949 | The Devil's Henchman                    | The Devil's Henchman                    | Friedman, Seymour                     | Seymour Friedman     | tt0041293 |
| 1746465291 | 1944 | 1944 | Return of the Ape Man                   | Return of the Ape Man                   | Rosen, Philip                         | Phil Rosen           | tt0037217 |
| 1746512923 | 1928 | 1928 | Last Lap                                | The Last Lap                            | Mitchell, Bruce                       | Bruce Mitchell       | tt0329280 |
| 1746542758 | 1927 | 1927 | The Mystery Brand                       | The Mystery Brand                       | Wilson, Ben                           | Ben F. Wilson        | tt0018186 |
| 1746509332 | 1926 | 1926 | The Fighting Doctor                     | The Fighting Doctor                     | Bradbury, Robert North                | Robert N. Bradbury   | tt0016859 |
| 1746500457 | 1925 | 1925 | Fun's Fun                               | Fun's Fun                               | Ray, Albert                           | Albert Ray           | tt0248025 |
| 1746520733 | 1925 | 1925 | Hurricane Hal                           | Hurricane Hal                           |                                       | John P. McCarthy     | tt0356715 |
| 1746520145 | 1924 | 1924 | Lawless Men                             | Lawless Men                             | Hart, Neal                            | Neal Hart            | tt0330549 |
| 1746500617 | 1924 | 1924 | Western Fate                            | Western Fate                            | Holt, George                          | George Holt          | tt0177383 |
| 1746464761 | 1941 | 1941 | The Gang's All Here                     | The Gang's All Here                     | Yarbrough, Jean                       | Jean Yarbrough       | tt0033646 |
| 1746464970 | 1941 | 1941 | Ladies in Retirement                    | Ladies in Retirement                    | Vidor, Charles                        | Charles Vidor        | tt0033802 |
| 1746436358 | 1940 | 1940 | Calling All Husbands                    | Calling All Husbands                    | Smith, Noel                           | Noel M. Smith        | tt0032297 |
| 1746580769 | 1938 | 1938 | The Land of Fighting Men                | Land of Fighting Men                    | James, Alan                           | Alan James           | tt0030343 |
| 1746580520 | 1938 | 1938 | Return to Life                          | Return to Life                          | Cartier, Henri                        | Henri Cartier        | tt0030676 |
| 1746582503 | 1936 | 1936 | Ghost Town                              | Ghost Town                              | Fraser, Harry                         | Harry L. Fraser      | tt0028927 |
| 1746580641 | 1936 | 1936 | Chatterbox                              | Chatterbox                              | Nicholls, George                      | George Nichols Jr.   | tt0027443 |
| 1746576964 | 1959 | 1959 | Roadracers                              | Roadracers                              | Swerdloff, Arthur                     | Arthur Swerdloff     | tt0230702 |
| 1746550237 | 1956 | 1956 | Walk the Dark Street                    | Walk the Dark Street                    | Ordung, Wyatt                         | Wyott Ordnung        | tt0049932 |
| 1746566314 | 1954 | 1954 | Jungle Gents                            | Jungle Gents                            | Bernds, Edward                        | Edward Bernds        | tt0047138 |
| 1769971132 | 1969 | 1969 | More Head                               | More Head                               | Glick, Wizard; Ruttenberg, Robert     | Wizard Glick         | tt0251860 |
| 1746216652 | 1967 | 1967 | Sadismo                                 | Sadismo                                 |                                       |                      | tt0217778 |
| 1746235163 | 1967 | 1967 | Anything for Money                      | Anything for Money                      | Sarno, Joe                            | Joseph W. Sarno      | tt0060113 |
| 1746200259 | 1967 | 1967 | The Strange Fetishes                    | The Strange Fetishes                    | Blancocello, Enrico                   | Enrico Blancocello   | tt0246956 |
| 1769970390 | 1967 | 1967 | Sex Club International                  | Sex Club International                  | Mahon, Barry                          | Barry Mahon          | tt0147455 |
| 1769970439 | 1967 | 1967 | Candy's Lustful Nature                  | Candy's Lustful Nature                  | Millard, Nicholas                     | Nick Millard         | tt1467247 |
| 1746553651 | 1965 | 1964 | Dog Star Man                            | Dog Star Man                            | Brakhage, Stan                        | Stan Brakhage        | tt5896468 |
| 1769969442 | 1965 | 1965 | The Hot Bed                             | The Hot Bed                             | Epstein, Harry                        | Harry Epstein        | tt0219814 |
| 1746577065 | 1963 | 1963 | Flipper                                 | Flipper                                 | Clark, James B.                       | James B. Clark       | tt0057063 |
| 1746578752 | 1963 | 1963 | The Young and the Brave                 | The Young and the Brave                 | Lyon, Francis D.                      | Francis D. Lyon      | tt0057709 |
| 1746577794 | 1935 | 1935 | Kid Courageous                          | Kid Courageous                          | Bradbury, Robert N.                   | Robert N. Bradbury   | tt0026567 |
| 1746576022 | 1931 | 1930 | Mystery of Life                         | The Mystery of Life                     | Cochrane, George                      | George Cochrane      | tt0151699 |
| 1746585085 | 1930 | 1930 | Leave It to Lester                      | Leave It to Lester                      | Cambria, Frank; Cozine, Ray           | Frank Cambria        | tt0021058 |
| 1746513044 | 1922 | 1922 | F. O. B. Africa                         | F.O.B. Africa                           | Warner, Jack L.                       | Jack L. Warner       | tt1402398 |

|            |      |      |                                    |                                    |                                   |                      |           |
|------------|------|------|------------------------------------|------------------------------------|-----------------------------------|----------------------|-----------|
| 1745395686 | 2011 | 2010 | The Woodmans                       | The Woodmans                       | Willis, Scott                     | Scott Willis         | tt1610516 |
| 1746210525 | 1970 | 1970 | The Kremlin Letter                 | The Kremlin Letter                 | Huston, John                      | John Huston          | tt0065950 |
| 1746583219 | 1950 | 1950 | Pagan Love Song                    | Pagan Love Song                    | Alton, Robert                     | Robert Alton         | tt0042829 |
| 1746584861 | 1929 | 1929 | Melody Lane                        | Melody Lane                        | Hill, Robert F.                   | Robert F. Hill       | tt0020160 |
| 1746520344 | 1950 | 1950 | The Boy from Indiana               | The Boy from Indiana               | Rawlins, John                     | John Rawlins         | tt0042278 |
| 1746573420 | 1931 | 1931 | Secrets of a Secretary             | Secrets of a Secretary             | Abbott, George                    | George Abbott        | tt0022359 |
| 1746581566 | 1910 | 1910 | An Interrupted Courtship           | An Interrupted Courtship           |                                   |                      | tt0256831 |
| 1746475517 | 1948 | 1948 | The Strawberry Roan                | The Strawberry Roan                | English, John                     | John English         | tt0040840 |
| 1746532994 | 1916 | 1916 | Embers                             | Embers                             | Maude, Arthur                     | Arthur Maude         | tt0157574 |
| 1746581924 | 1928 | 1929 | The Sideshow                       | The Side Show                      | Kenton, Erle C.                   | Doc Salomon          | tt1706507 |
| 1746486830 | 1920 | 1920 | Girls Don't Gamble                 | Girls Don't Gamble                 | Butler, Fred J.; McClung, Hugh C. | Fred J. Butler       | tt0012220 |
| 1746520720 | 1925 | 1925 | As Man Desires                     | As Man Desires                     | Cummings, Irving                  | Irving Cummings      | tt0015579 |
| 1746542630 | 1926 | 1926 | Behind the Front                   | Behind the Front                   | Sutherland, Edward                | A. Edward Sutherland | tt0016638 |
| 1746491805 | 1948 | 1948 | Adventures of Gallant Bess         | Adventures of Gallant Bess         | Landers, Lew                      | Lew Landers          | tt0040078 |
| 1746454672 | 1946 | 1946 | Danger Woman                       | Danger Woman                       | Collins, Lewis D.                 | Lewis D. Collins     | tt0038446 |
| 1746509445 | 1926 | 1926 | The Boy Friend                     | The Boy Friend                     | Bell, Monta                       | Monta Bell           | tt0016677 |
| 1746508249 | 1924 | 1924 | Roulette                           | Roulette                           | Taylor, S. E. V.                  | Stanner E.V. Taylor  | tt0015293 |
| 1746562033 | 1953 | 1953 | Inferno                            | Inferno                            | Baker, Roy                        | Roy Ward Baker       | tt0045911 |
| 1746503026 | 1927 | 1926 | The Fire Brigade                   | The Fire Brigade                   | Nigh, William                     | William Nigh         | tt0016874 |
| 1746514302 | 1916 | 1916 | The Aryan                          | The Aryan                          | Hart, William S.                  | Reginald Barker      | tt0006375 |
| 1746584327 | 1936 | 1936 | Petticoat Fever                    | Petticoat Fever                    | Fitzmaurice, Geo.                 | George Fitzmaurice   | tt0028097 |
| 1746581303 | 1961 | 1961 | 20,000 Eyes                        | 20,000 Eyes                        | Leewood, Jack                     | Jack Leewood         | tt0054585 |
| 1746515793 | 1921 | 1921 | Cold Steel                         | Cold Steel                         | MacDonald, Sherwood               | Sherwood MacDonald   | tt0012058 |
| 1746475268 | 1948 | 1948 | Sitting Pretty                     | Sitting Pretty                     | Lang, Walter                      | Walter Lang          | tt0040795 |
| 1746580783 | 1934 | 1934 | Judge Priest                       | Judge Priest                       | Ford, John                        | John Ford            | tt0025335 |
| 1746269917 | 1980 | 1980 | Borderline                         | Borderline                         | Freedman, Jerrold                 | Jerrold Freedman     | tt0080465 |
| 1746584135 | 1935 | 1935 | Sweet Music                        | Sweet Music                        | Green, Alfred E.                  | Alfred E. Green      | tt0027064 |
| 1746532758 | 1915 | 1915 | Her Reckoning                      | Her Reckoning                      | Horan, Charles                    | Charles Horan        | tt0005476 |
| 1746581562 | 1950 | 1950 | Sierra                             | Sierra                             | Green, Alfred E.                  | Alfred E. Green      | tt0042963 |
| 1746492474 | 1945 | 1945 | Here Come the Co-Eds               | Here Come the Co eds               | Yarbrough, Jean                   | Jean Yarbrough       | tt0037771 |
| 1746453769 | 1943 | 1943 | The Dancing Masters                | The Dancing Masters                | St. Clair, Mal                    | Malcolm St. Clair    | tt0035777 |
| 1746523589 | 1923 | 1923 | The Eternal Struggle               | The Eternal Struggle               | Barker, Reginald                  | Reginald Barker      | tt0014024 |
| 1746569595 | 1958 | 1958 | Country Music Holiday              | Country Music Holiday              | Ganzer, Alvin                     | Alvin Ganzer         | tt0051493 |
| 1746219022 | 1979 | 1979 | Butch and Sundance: The Early Days | Butch and Sundance: The Early Days | Lester, Richard                   | Richard Lester       | tt0078919 |
| 1746585270 | 1929 | 1929 | It Can Be Done                     | It Can Be Done                     | Newmeyer, Fred                    | Fred C. Newmeyer     | tt0020033 |
| 1746453795 | 1941 | 1941 | Hurricane Smith                    | Hurricane Smith                    | Vorhaus, Bernard                  | Bernard Vorhaus      | tt0034878 |
| 1746509197 | 1925 | 1925 | School for Wives                   | School for Wives                   | Halperin, Victor Hugo             | Victor Halperin      | tt0016323 |
| 1746420143 | 1983 | 1983 | The Big Chill                      | The Big Chill                      | Kasdan, Lawrence                  | Lawrence Kasdan      | tt0085244 |
| 1746523280 | 1923 | 1923 | Ashes of Vengeance                 | Ashes of Vengeance                 |                                   | Frank Lloyd          | tt0013841 |
| 1746500270 | 1924 | 1924 | What Three Men Wanted              | What Three Men Wanted              | Burns, Paul                       | Paul Burns           | tt0015483 |
| 1746523314 | 1910 | 1910 | Love, Luck and Gasoline            | Love, Luck and Gasoline            |                                   | Wilfrid North        | tt0338215 |
| 1746584842 | 1930 | 1930 | Second Choice                      | Second Choice                      | Bretherton, Howard                | Howard Bretherton    | tt0021350 |
| 1746394380 | 1985 | 1985 | Dim Sum: A Little Bit of Heart     | Dim Sum: A Little Bit of Heart     | Wang, Wayne                       | Wayne Wang           | tt0087150 |
| 1746569716 | 1954 | 1954 | Ma and Pa Kettle at Home           | Ma and Pa Kettle at Home           | Lamont, Charles                   | Charles Lamont       | tt0047197 |
| 1746500581 | 1926 | 1926 | Mannequin                          | Mannequin                          | Cruze, James                      | James Cruze          | tt0017117 |
| 1746520721 | 1948 | 1948 | Unknown Island                     | Unknown Island                     | Bernhard, Jack                    | Jack Bernhard        | tt0040920 |
| 1746520043 | 1925 | 1925 | Parisian Love                      | Parisian Love                      | Gasnier, Louis                    | Louis J. Gasnier     | tt0016201 |
| 1745393662 | 2010 | 2010 | Life As We Know It                 | Life as We Know It                 | Berlanti, Greg                    | Greg Berlanti        | tt1055292 |
| 1746573490 | 1931 | 1931 | Shanghai'd Love                    | Shanghai'd Love                    | Seitz, George B.                  | George B. Seitz      | tt0022369 |
| 1746575554 | 1931 | 1931 | Flying High                        | Flying High                        | Riesner, Charles F.               | Charles Reisner      | tt0021879 |
| 1746410528 | 1987 | 1987 | House II: The Second Story         | House II: The Second Story         | Wiley, Ethan                      | Ethan Wiley          | tt0093220 |
| 1746453506 | 1942 | 1942 | Sealed Lips                        | Sealed Lips                        | Waggner, George                   | George Waggner       | tt0034163 |
| 1746487132 | 1920 | 1920 | Chains of Evidence                 | Chains of Evidence                 | Fitzgerald, Dallas M.             | Dallas M. Fitzgerald | tt0011047 |
| 1746570029 | 1934 | 1934 | Money Means Nothing                | Money Means Nothing                | Cabanne, Christy                  | Christy Cabanne      | tt0025513 |
| 1746578938 | 1962 | 1962 | Tonight for Sure!                  | Tonight for Sure                   | Coppola, Francis                  | Francis Ford Coppola | tt0153167 |
| 1746562077 | 1955 | 1955 | Duel on the Mississippi            | Duel on the Mississippi            | Castle, William                   | William Castle       | tt0048023 |
| 1769971089 | 1968 | 1968 | Candy                              | Candy                              | Marquand, Christian               | Christian Marquand   | tt0062776 |

|            |      |      |                           |                             |                                |                      |           |
|------------|------|------|---------------------------|-----------------------------|--------------------------------|----------------------|-----------|
| 1746520639 | 1927 | 1927 | Million Dollar Mystery    | Million Dollar Mystery      | Hunt, Charles J.               | Charles J. Hunt      | tt0018160 |
| 1746583382 | 1951 | 1951 | He Ran All the Way        | He Ran All the Way          | Berry, John; Berry, John       | John Berry           | tt0043625 |
| 1746474141 | 1944 | 1944 | I Love a Soldier          | I Love a Soldier            | Sandrich, Mark                 | Mark Sandrich        | tt0036938 |
| 1746580378 | 1937 | 1937 | Westbound Mail            | Westbound Mail              | Blangsted, Folmer              | Folmar Blangsted     | tt0134210 |
| 1746563361 | 1951 | 1951 | Show Boat                 | Show Boat                   | Sidney, George                 | George Sidney        | tt0044030 |
| 1746408657 | 1988 | 1988 | Big Top Pee-wee           | Big Top Pee wee             | Kleiser, Randal                | Randal Kleiser       | tt0094744 |
| 1746421290 | 1990 | 1990 | The Exorcist III          | The Exorcist III            | Blatty, William Peter          | William Peter Blatty | tt0099528 |
| 1769970392 | 1966 | 1966 | Brothel                   | Brothel                     | Vehr, Bill                     | Bill Vehr            | tt0212003 |
| 1746420893 | 1990 | 1990 | Miami Blues               | Miami Blues                 | Armitage, George               | George Armitage      | tt0100143 |
| 1746218703 | 1971 | 1971 | Directed by John Ford     | Directed by John Ford       | Bogdanovich, Peter             | Peter Bogdanovich    | tt0066997 |
| 1746434272 | 1989 | 1989 | Tap                       | Tap                         | Castle, Nick                   | Nick Castle          | tt0098442 |
| 1746409455 | 1991 | 1991 | The Hard Way              | The Hard Way                | Badham, John                   | John Badham          | tt0102004 |
| 1746437420 | 1943 | 1943 | The Seventh Victim        | The Seventh Victim          | Robson, Mark                   | Mark Robson          | tt0036341 |
| 1746453647 | 1941 | 1941 | Moonlight in Hawaii       | Moonlight in Hawaii         | Lamont, Charles                | Charles Lamont       | tt0033919 |
| 1746573475 | 1932 | 1932 | The First Year            | The First Year              | Howard, William K.             | William K. Howard    | tt0022892 |
| 1745294051 | 2007 | 2007 | Delta Farce               | Delta Farce                 | Harding, C. B.                 | C. B. Harding        | tt0800003 |
| 1746492088 | 1946 | 1946 | They Made Me a Killer     | They Made Me a Killer       | Thomas, William C.             | William C. Thomas    | tt0039023 |
| 1746577549 | 1934 | 1934 | Limehouse Blues           | Limehouse Blues             | Hall, Alexander                | Alexander Hall       | tt0025399 |
| 1746453942 | 2000 | 2000 | Duets                     | Duets                       | Paltrow, Bruce                 | Bruce Paltrow        | tt0134630 |
| 1746524721 | 1910 | 1910 | Over Silent Paths         | Over Silent Paths           | Griffith, D. W.                | D. W. Griffith       | tt0001351 |
| 1746438317 | 1944 | 1944 | Roger Touhy, Gangster     | Roger Touhy, Gangster       | Florey, Robert                 | Robert Florey        | tt0036846 |
| 1745341476 | 2004 | 2004 | The Future of Food        | The Future of Food          | Garcia, Deborah Koons          | Deborah Koons        | tt0427276 |
| 1746584279 | 1937 | 1937 | Kid Galahad               | Kid Galahad                 | Curtiz, Michael                | Michael Curtiz       | tt0029080 |
| 1746184544 | 1910 | 1910 | Branding a Thief          | Branding a Thief            |                                | William F. Haddock   | tt0035750 |
| 1746436773 | 1992 | 1992 | Mr. Saturday Night        | Mr. Saturday Night          | Crystal, Billy                 | Billy Crystal        | tt0104928 |
| 1746554406 | 1964 | 1964 | The Chalk Garden          | The Chalk Garden            | Neame, Ronald                  | Ronald Neame         | tt0057933 |
| 1746235896 | 1974 | 1974 | The Sugarland Express     | The Sugarland Express       | Spielberg, Steven              | Steven Spielberg     | tt0072226 |
| 1746574729 | 1934 | 1934 | Riding Speed              | Riding Speed                |                                | Jay Wilsey           | tt0133179 |
| 1746560026 | 1965 | 1965 | Who Killed Teddy Bear?    | Who Killed Teddy Bear       | Cates, Joseph                  | Joseph Cates         | tt0059909 |
| 1746561000 | 1965 | 1965 | Tickle Me                 | Tickle Me                   | Taug, Norman                   | Norman Taurog        | tt0056585 |
| 1746500436 | 1926 | 1926 | The Millionaire Policeman | The Millionaire Policeman   | Le Saint, Edward J.            | Edward LeSaint       | tt0017153 |
| 1746436579 | 1941 | 1941 | Two Gun Sheriff           | Two Gun Sheriff             | Sherman, George                | George Sherman       | tt0034324 |
| 1746492723 | 1943 | 1943 | Spy Train                 | Spy Train                   | Young, Harold                  | Harold Young         | tt0036383 |
| 1746578048 | 1938 | 1938 | Gateway                   | Gateway                     | Werker, Alfred                 | Alfred L. Werker     | tt0030173 |
| 1746585099 | 1930 | 1930 | Men Without Women         | Men Without Women           | Ford, John                     | John Ford            | tt0021140 |
| 1746500398 | 1926 | 1925 | The Feud Woman            | The Feud Woman              | Williamson, R. E.              | Robin Williamson     | tt0357658 |
| 1745302720 | 2005 | 2005 | Four Brothers             | Four Brothers               | Singleton, John                | John Singleton       | tt0430105 |
| 1746550227 | 1955 | 1955 | City of Shadows           | City of Shadows             | Witney, William                | William Witney       | tt0047942 |
| 1746583696 | 1931 | 1931 | The Sky Spider            | The Sky Spider              | Thorpe, Richard                | Richard Thorpe       | tt0022399 |
| 1746584458 | 1928 | 1928 | Wheel of Chance           | Wheel of Chance             | Santell, Alfred                | Alfred Santell       | tt0019569 |
| 1746574165 | 1961 | 1961 | Maeva                     | Maeva                       | Bonsignori, Umberto            | Umberto Bonsignori   | tt0055120 |
| 1746464887 | 1945 | 1945 | They Were Expendable      | They Were Expendable        | Ford, John                     | John Ford            | tt0038160 |
| 1746485877 | 1919 | 1919 | The Volcano               | The Volcano                 | Irving, George                 | George Irving        | tt0010851 |
| 1746569505 | 1955 | 1955 | It's a Dog's Life         | It's a Dog's Life           | Hoffman, Herman                | Herman Hoffman       | tt0048217 |
| 1746233537 | 1968 | 1968 | The Girl Grabbers         | The Girl Grabbers           | Nuchtern, Simon                | Simon Nuchtern       | tt0125765 |
| 1746520753 | 1926 | 1926 | Law of the Snow Country   | The Law of the Snow Country | Hurst, Paul                    | Paul Hurst           | tt0017061 |
| 1746438162 | 1942 | 1942 | Let's Get Tough!          | Let's Get Tough!            | Fox, Wallace                   | Wallace Fox          | tt0034973 |
| 1746439474 | 1941 | 1941 | Rise and Shine            | Rise and Shine              | Dwan, Allan                    | Allan Dwan           | tt0034112 |
| 1746585152 | 1928 | 1928 | The Bantam Cowboy         | The Bantam Cowboy           | King, Louis                    | Louis King           | tt0377453 |
| 1746500735 | 1926 | 1926 | The Night Watch           | The Night Watch             | Caldwell, Fred                 | Fred Caldwell        | tt0017208 |
| 1745375004 | 2008 | 2008 | Sleepwalking              | Sleepwalking                | Maher, William                 | Bill Maher           | tt0888693 |
| 1746573945 | 1956 | 1956 | Yaqui Drums               | Yaqui Drums                 | Yarbrough, Jean                | Jean Yarbrough       | tt0049970 |
| 1746524153 | 1914 | 1914 | The Merchant of Venice    | The Merchant of Venice      | Smalley, Phillips; Weber, Lois | Phillips Smalley     | tt0004325 |
| 1746576961 | 1961 | 1961 | Blue Hawaii               | Blue Hawaii                 | Taug, Norman                   | Norman Taurog        | tt0054692 |
| 1746520569 | 1926 | 1926 | Josselyn's Wife           | Josselyn's Wife             | Thorpe, Richard                | Richard Thorpe       | tt0017011 |
| 1746561395 | 1932 | 1932 | Two Fisted Law            | Two Fisted Law              | Lederman, D. Ross              | D. Ross Lederman     | tt0023631 |
| 1746394029 | 1984 | 1984 | Just the Way You Are      | Just the Way You Are        | Molinaro, Edouard              | Édouard Molinaro     | tt0087525 |

|            |      |      |                                    |                                    |                                      |                        |           |
|------------|------|------|------------------------------------|------------------------------------|--------------------------------------|------------------------|-----------|
| 1745359816 | 2004 | 2004 | Johnson Family Vacation            | Johnson Family Vacation            | Erskin, Christopher                  | Christopher Erskin     | tt0359517 |
| 1746503700 | 1917 | 1917 | The Inspirations of Harry Larrabee | The Inspirations of Harry Larrabee | Bracken, Bertram                     | Bertram Bracken        | tt0137023 |
| 1746570431 | 1934 | 1934 | Orient Express                     | Orient Express                     | Martin, Paul                         | Paul Martin            | tt0025608 |
| 1746582408 | 1937 | 1937 | The Sheik Steps Out                | The Sheik Steps Out                | Pichel, Irving                       | Irving Pichel          | tt0029553 |
| 1769969403 | 1911 | 1911 | The Derelict                       | The Derelict                       |                                      | Phillips Smalley       | tt1284458 |
| 1746424050 | 1942 | 1942 | Wake Island                        | Wake Island                        | Farrow, John                         | John Farrow            | tt0035530 |
| 1746500038 | 1945 | 1945 | Swingin' on a Rainbow              | Swingin' on a Rainbow              | Beaudine, William                    | William Beaudine       | tt0038144 |
| 1746578833 | 1959 | 1958 | Gideon of Scotland Yard            | Gideon of Scotland Yard            | Ford, John                           | John Ford              | tt0051655 |
| 1746235036 | 1977 | 1977 | The Car                            | The Car                            | Silverstein, Elliot                  | Elliot Silverstein     | tt0075809 |
| 1746577974 | 1938 | 1938 | The Marines Are Here               | The Marines Are Here               | Rosen, Phil                          | Phil Rosen             | tt0030419 |
| 1746467185 | 1917 | 1917 | Pots-and-Pans Peggy                | Pots and Pans Peggy                | Moore, Eugene                        | Eugene Moore           | tt0008445 |
| 1746534788 | 1922 | 1922 | The Woman Conquers                 | The Woman Conquers                 | Forman, Tom                          | Tom Forman             | tt0013778 |
| 1746580231 | 1938 | 1938 | The Dawn Patrol                    | The Dawn Patrol                    | Goulding, Edmund                     | Edmund Goulding        | tt0030044 |
| 1746465037 | 1942 | 1942 | A-Haunting We Will Go              | A Haunting We Will Go              | Werker, Alfred                       | Alfred L. Werker       | tt0034424 |
| 1746512613 | 1927 | 1927 | White Flannels                     | White Flannels                     | Bacon, Lloyd                         | Lloyd Bacon            | tt0018570 |
| 1746523292 | 1916 | 1916 | Fate's Boomerang                   | Fate's Boomerang                   | Crane, Frank H.                      | Frank Hall Crane       | tt0157618 |
| 1746475277 | 1947 | 1947 | The Wistful Widow of Wagon Gap     | The Wistful Widow of Wagon Gap     | Barton, Charles T.                   | Charles Barton         | tt0039998 |
| 1746273823 | 1979 | 1979 | Cuba                               | Cuba                               | Lester, Richard                      | Richard Lester         | tt0079013 |
| 1746578739 | 1960 | 1960 | The Angel Wore Red                 | The Angel Wore Red                 | Johnson, Nunnally                    | Nunnally Johnson       | tt0053601 |
| 1746567229 | 1933 | 1933 | Too Much Harmony                   | Too Much Harmony                   | Sutherland, Edward                   | A. Edward Sutherland   | tt0024683 |
| 1746219372 | 1974 | 1973 | Road Movie                         | Road Movie                         | Strick, Joseph                       | Joseph Strick          | tt0072089 |
| 1746582327 | 1951 | 1951 | Three Desperate Men                | Three Desperate Men                | Newfield, Sam                        | Sam Newfield           | tt0044124 |
| 1769977813 | 1982 | 1982 | Tron                               | TRON                               | Lisberger, Steven                    | Steven Lisberger       | tt0084827 |
| 1746513394 | 1914 | 1914 | Ready Money                        | Ready Money                        | Apfel, Oscar C.                      | Oscar Apfel            | tt0004514 |
| 1746500380 | 1926 | 1926 | The Arizona Streak                 | The Arizona Streak                 | De Lacy, Robert                      | Robert De Lacey        | tt0016609 |
| 1746524300 | 1923 | 1923 | The Tiger's Claw                   | The Tiger's Claw                   | Henabery, Joseph                     | Joseph Henabery        | tt0014548 |
| 1746571359 | 1934 | 1934 | Hi Nellie!                         | Hi, Nellie!                        | LeRoy, Mervyn                        | Mervyn LeRoy           | tt0025250 |
| 1746393620 | 1986 | 1986 | Raw Deal                           | Raw Deal                           | Irvin, John                          | John Irvin             | tt0091828 |
| 1746219049 | 1973 | 1973 | The Mack                           | The Mack                           | Campus, Michael                      | Michael Campus         | tt0070350 |
| 1745375272 | 2008 | 2007 | Then She Found Me                  | Then She Found Me                  | Hunt, Helen                          | Helen Hunt             | tt0455805 |
| 1746582508 | 1937 | 1937 | Mr. Dodd Takes the Air             | Mr. Dodd Takes the Air             | Green, Alfred E.                     | Alfred E. Green        | tt0029267 |
| 1746583004 | 1939 | 1939 | Zenobia                            | Zenobia                            | Douglas, Gordon                      | Gordon Douglas         | tt0032158 |
| 1746577499 | 1936 | 1936 | The Kid Ranger                     | The Kid Ranger                     | Bradbury, Robert N.                  | Robert N. Bradbury     | tt0027842 |
| 1746219128 | 1973 | 1973 | The Day of the Dolphin             | The Day of the Dolphin             | Nichols, Mike                        | Mike Nichols           | tt0069946 |
| 1746578484 | 1961 | 1960 | Girl Fever                         | Girl Fever                         | Petrushansky, Yevsie; Price, Shermar | Yevsie S. Petrushansky | tt0266586 |
| 1746580353 | 1939 | 1939 | Juarez                             | Juarez                             | Dieterle, William                    | William Dieterle       | tt0031516 |
| 1746515797 | 1920 | 1920 | Greater Than Fame                  | Greater Than Fame                  | Crosland, Alan                       | Alan Crosland          | tt0011249 |
| 1746578011 | 1938 | 1938 | The Shining Hour                   | The Shining Hour                   | Borzage, Frank                       | Frank Borzage          | tt0030743 |
| 1746410682 | 1988 | 1988 | Running on Empty                   | Running on Empty                   | Lumet, Sidney                        | Sidney Lumet           | tt0096018 |
| 1746577598 | 1937 | 1937 | Wise Girl                          | Wise Girl                          | Jason, Leigh                         | Leigh Jason            | tt0029786 |
| 1746532844 | 1915 | 1915 | The Juggernaut                     | The Juggernaut                     | Ince, Ralph W.                       | Ralph Ince             | tt0005579 |
| 1746562048 | 1956 | 1956 | Diane                              | Diane                              | Miller, David                        | David Miller           | tt0049140 |
| 1746475256 | 1947 | 1947 | Vigilantes of Boomtown             | Vigilantes of Boomtown             | Springsteen, R. G.                   | R.G. Springsteen       | tt0039959 |
| 1746578031 | 1937 | 1937 | The Fighting Deputy                | The Fighting Deputy                | Newfield, Sam                        | Sam Newfield           | tt0028870 |
| 1746563932 | 1953 | 1953 | All I Desire                       | All I Desire                       | Sirk, Douglas                        | Douglas Sirk           | tt0045492 |
| 1746567932 | 1934 | 1934 | Down to Their Last Yacht           | Down to Their Last Yacht           | Sloane, Paul                         | Paul Sloane            | tt0025066 |
| 1746438284 | 1942 | 1942 | Outlaws of Boulder Pass            | Outlaws of Boulder Pass            | Newfield, Sam                        | Sam Newfield           | tt0035162 |
| 1746496873 | 1918 | 1918 | Ruling Passions                    | Ruling Passions                    | Schomer, Abraham S.                  | Abraham S. Schomer     | tt0187469 |
| 1745302749 | 2007 | 2007 | Waitress                           | Waitress                           | Shelly, Adrienne                     | Adrienne Shelly        | tt0473308 |
| 1746453953 | 1998 | 1997 | The Alarmist                       | The Alarmist                       | Dunsky, Evan                         | Evan Dunsky            | tt0119534 |
| 1746210728 | 1972 | 1972 | Where Does It Hurt?                | Where Does It Hurt?                | Amateau, Rod                         | Rod Amateau            | tt0069497 |
| 1746585291 | 1928 | 1928 | The Black Feather                  | Black Feather                      | Ince, John E.                        | John Ince              | tt0018705 |
| 1746453597 | 1945 | 1945 | Fog Island                         | Fog Island                         | Morse, Terry                         | Terry O. Morse         | tt0037711 |
| 1769969491 | 1965 | 1965 | "Rent-A-Girl"                      | Rent a Girl                        | Rose, William L.                     | William Rose           | tt0146230 |
| 1746554332 | 1964 | 1964 | The Guns of August                 | The Guns of August                 | Kroll, Nathan                        | Nathan Kroll           | tt0132998 |
| 1746585172 | 1930 | 1930 | Shadow Ranch                       | Shadow Ranch                       | King, Louis                          | Louis King             | tt0021358 |
| 1746507771 | 1948 | 1948 | Blondie's Secret                   | Blondie's Secret                   | Bernds, Edward                       | Edward Bernds          | tt0040174 |

|            |      |      |                              |                              |                                   |                    |           |
|------------|------|------|------------------------------|------------------------------|-----------------------------------|--------------------|-----------|
| 1746503407 | 1922 | 1922 | Smudge                       | Smudge                       | Ray, Charles                      | Charles Ray        | tt0013613 |
| 1746576906 | 1931 | 1931 | Heaven on Earth              | Heaven on Earth              | Mack, Russell                     | Russell Mack       | tt0021947 |
| 1746530755 | 1949 | 1949 | Miss Mink of 1949            | Miss Mink of 1949            | Tryon, Glenn                      | Glenn Tryon        | tt0041653 |
| 1746520127 | 1926 | 1926 | The Runaway Express          | The Runaway Express          | Sedgwick, Edward                  | Edward Sedgwick    | tt0017339 |
| 1746578026 | 1938 | 1938 | The Sisters                  | The Sisters                  | Litvak, Anatole                   | Anatole Litvak     | tt0030755 |
| 1746491721 | 1948 | 1948 | Concert Magic                | Concert Magic                | Gordon, Paul                      | Paul Gordon        | tt0220370 |
| 1746566032 | 1957 | 1957 | The Bachelor Party           | The Bachelor Party           | Mann, Delbert                     | Delbert Mann       | tt0050156 |
| 1746504753 | 1917 | 1917 | The Yellow Bullet            | The Yellow Bullet            | Harvey, Harry                     | Harry Harvey       | tt0008796 |
| 1746465130 | 1947 | 1947 | Dear Ruth                    | Dear Ruth                    | Russell, William D.               | William D. Russell | tt0039307 |
| 1746466887 | 1917 | 1917 | The Lincoln Cycle            | The Lincoln Cycle            | Stahl, John M.                    | John M. Stahl      | tt0176932 |
| 1745293693 | 2005 | 2005 | The Longest Yard             | The Longest Yard             | Segal, Peter                      | Peter Segal        | tt0398165 |
| 1746514472 | 1915 | 1915 | Help Wanted                  | Help Wanted                  | Bosworth, Hobart                  | Hobart Bosworth    | tt0005465 |
| 1746503885 | 1922 | 1922 | Two-fisted Jefferson         | Two-fisted Jefferson         | Clements, Roy                     | Roy Clements       | tt0175267 |
| 1746577808 | 1935 | 1935 | Steamboat Round the Bend     | Steamboat Round the Bend     | Ford, John                        | John Ford          | tt0027042 |
| 1746577540 | 1937 | 1937 | The Hit Parade               | The Hit Parade               | Meins, Gus                        | Gus Meins          | tt0029003 |
| 1746504211 | 1918 | 1918 | The Ghost of Rosy Taylor     | The Ghost of Rosy Taylor     | Sloman, Edward S.                 | Edward Sloman      | tt0009104 |
| 1746570177 | 1934 | 1934 | Wednesday's Child            | Wednesday's Child            | Robertson, John                   | John S. Robertson  | tt0025967 |
| 1746581870 | 1928 | 1928 | Sharp Shooters               | Sharp Shooters               | Blystone, J. G.                   | John G. Blystone   | tt0019370 |
| 1746454703 | 1941 | 1941 | You Belong to Me             | You Belong to Me             | Ruggles, Wesley                   | Wesley Ruggles     | tt0034407 |
| 1746569534 | 1957 | 1957 | The Deerslayer               | The Deerslayer               | Neumann, Kurt                     | Kurt Neumann       | tt0050299 |
| 1746567258 | 1932 | 1932 | Vanity Street                | Vanity Street                | Grinde, Nicholas                  | Nick Grinde        | tt0023653 |
| 1746555655 | 1956 | 1956 | Shake, Rattle & Rock!        | Shake, Rattle & Rock!        | Cahn, Edward L.                   | Edward L. Cahn     | tt0049749 |
| 1746502889 | 1910 | 1910 | Taming a Husband             | Taming a Husband             | Griffith, D. W.                   | D.W. Griffith      | tt0001410 |
| 1746574395 | 1962 | 1962 | Boys' Night Out              | Boys' Night Out              | Gordon, Michael                   | Michael Gordon     | tt0055809 |
| 1746497266 | 1922 | 1922 | What's Wrong With the Women? | What's Wrong with the Women? | Neill, R. William                 | Roy William Neill  | tt0013747 |
| 1745341597 | 2008 | 2008 | Be Kind Rewind               | Be Kind Rewind               | Gondry, Michel                    | Michel Gondry      | tt0799934 |
| 1746530722 | 1950 | 1950 | Black Hand                   | Black Hand                   | Thorpe, Richard                   | Richard Thorpe     | tt0041181 |
| 1745309555 | 2007 | 2006 | DOA: Dead or Alive           | DOA: Dead or Alive           | Yuen, Corey                       | Corey Yuen         | tt0398913 |
| 1746423261 | 1997 | 1997 | Nothing to Lose              | Nothing to Lose              | Oederkerk, Steve                  | Steve Oederkerk    | tt0119807 |
| 1746580700 | 1936 | 1936 | The Prisoner of Shark Island | The Prisoner of Shark Island | Ford, John                        | John Ford          | tt0028141 |
| 1746578059 | 1936 | 1936 | Isle of Fury                 | Isle of Fury                 | McDonald, Frank                   | Frank McDonald     | tt0027805 |
| 1746504560 | 1920 | 1920 | The Branding Iron            | The Branding Iron            | Barker, Reginald                  | Reginald Barker    | tt0011021 |
| 1746503520 | 1921 | 1921 | Seven Years Bad Luck         | Seven Years Bad Luck         | Linder, Max                       | Max Linder         | tt0127834 |
| 1746584471 | 1928 | 1928 | Baby Mine                    | Baby Mine                    | Leonard, Robert Z.                | Robert Z. Leonard  | tt0018668 |
| 1745303161 | 2005 | 2005 | Dirty Love                   | Dirty Love                   | Asher, John                       | John Asher         | tt0327643 |
| 1746508088 | 1926 | 1926 | The Man in the Saddle        | The Man in the Saddle        | Smith, Clifford S.                | Lynn Reynolds      | tt0017112 |
| 1746520680 | 1925 | 1925 | The Red Rider                | The Red Rider                | Smith, Clifford S.                | Clifford Smith     | tt0016278 |
| 1746464856 | 1944 | 1944 | Janie                        | Janie                        | Curtiz, Michael                   | Michael Curtiz     | tt0036970 |
| 1746514514 | 1914 | 1914 | The Spy                      | The Spy                      | Turner, Otis                      | Otis Turner        | tt0004633 |
| 1745359965 | 2001 | 2001 | Wet Hot American Summer      | Wet Hot American Summer      | Wain, David                       | David Wain         | tt0243655 |
| 1746565493 | 1932 | 1932 | Virtue                       | Virtue                       | Buzzell, Edward                   | Edward Buzzell     | tt0023659 |
| 1746572026 | 1931 | 1931 | Cracked Nuts                 | Cracked Nuts                 | Cline, Edward                     | Edward F. Cline    | tt0021768 |
| 1746580580 | 1937 | 1937 | It Can't Last Forever        | It Can't Last Forever        | MacFadden, Hamilton               | Hamilton MacFadden | tt0029053 |
| 1746435278 | 1940 | 1940 | Margie                       | Margie                       | Garrett, Otis; Smith, Paul Gerard | Otis Garrett       | tt0032759 |
| 1746465092 | 1947 | 1947 | Bulldog Drummond at Bay      | Bulldog Drummond at Bay      | Salkow, Sidney                    | Sidney Salkow      | tt0039229 |
| 1746572835 | 1910 | 1910 | Cupid and the Motor Boat     | Cupid and the Motor Boat     |                                   | J. Stuart Blackton | tt0298819 |
| 1746409819 | 1988 | 1988 | High Spirits                 | High Spirits                 | Jordan, Neil                      | Neil Jordan        | tt0095304 |
| 1746569798 | 1953 | 1953 | Thy Neighbor's Wife          | Thy Neighbor's Wife          | Haas, Hugo                        | Hugo Haas          | tt0046428 |
| 1746464844 | 1944 | 1944 | The Hour Before the Dawn     | The Hour Before the Dawn     | Tuttle, Frank                     | Frank Tuttle       | tt0036930 |
| 1746582422 | 1937 | 1937 | Saturday's Heroes            | Saturday's Heroes            | Killy, Edward                     | Edward Killy       | tt0029517 |
| 1746409714 | 1988 | 1987 | Dudes                        | Dudes                        | Spheeris, Penelope                | Penelope Spheeris  | tt0092933 |
| 1746583750 | 1931 | 1931 | Range Feud                   | The Range Feud               | Lederman, D. Ross                 | D. Ross Lederman   | tt0022293 |
| 1746577582 | 1933 | 1933 | My Weakness                  | My Weakness                  | Butler, David                     | David Butler       | tt0024364 |
| 1746582999 | 1937 | 1937 | Girl Loves Boy               | Girl Loves Boy               | Mansfield, Duncan                 | Duncan Mansfield   | tt0028930 |
| 1746464893 | 1942 | 1942 | The Affairs of Martha        | The Affairs of Martha        | Dassin, Jules                     | Jules Dassin       | tt0034433 |
| 1746584716 | 1930 | 1930 | Behind the Make-Up           | Behind the Make Up           | Milton, Robert                    | Robert Milton      | tt0020677 |
| 1746571289 | 1934 | 1934 | Registered Nurse             | Registered Nurse             | Florey, Robert                    | Robert Florey      | tt0025709 |

|                   |             |             |                                       |                                       |                                     |                         |                  |
|-------------------|-------------|-------------|---------------------------------------|---------------------------------------|-------------------------------------|-------------------------|------------------|
| 1746584387        | 1939        | 1939        | The Fighting Gringo                   | The Fighting Gringo                   | Howard, David                       | David Howard            | tt0031304        |
| 1746584386        | 1939        | 1939        | Five Little Peppers and How They Grew | Five Little Peppers and How They Grew | Barton, Charles                     | Charles Barton          | tt0031315        |
| 1746524659        | 1915        | 1915        | The Master of the House               | The Master of the House               | Golden, Joseph A.                   | Joseph A. Golden        | tt0005725        |
| 1746500544        | 1949        | 1949        | Tale of the Navajos                   | Tale of the Navajos                   |                                     |                         | tt0041946        |
| 1746577956        | 1938        | 1938        | Extortion                             | Extortion                             | Hillyer, Lambert                    | Lambert Hillyer         | tt0030114        |
| 1746582492        | 1935        | 1935        | Circle of Death                       | The Circle of Death                   | Glendon, J. Frank                   | J. Frank Glendon        | tt0125701        |
| <b>1746455657</b> | <b>1995</b> | <b>1995</b> | <b>Wigstock: The Movie</b>            | <b>Wigstock: The Movie</b>            | <b>Shils, Barry</b>                 | <b>Barry Shils</b>      | <b>tt0114937</b> |
| 1746549869        | 1955        | 1955        | Desert Sands                          | Desert Sands                          | Selander, Lesley                    | Lesley Selander         | tt0047983        |
| 1746492447        | 1946        | 1946        | Abie's Irish Rose                     | Abie's Irish Rose                     | Sutherland, A. Edward               | A. Edward Sutherland    | tt0038283        |
| 1746436567        | 1942        | 1942        | Mr. & Mrs. North                      | Mr. and Mrs. North                    | Sinclair, Robert B.                 | Robert B. Sinclair      | tt0033926        |
| 1746198414        | 1968        | 1968        | The Savage Seven                      | The Savage Seven                      | Rush, Richard                       | Richard Rush            | tt0063553        |
| 1746577189        | 1963        | 1963        | California                            | California                            | Petroff, Hamil                      | Hamil Petroff           | tt0056896        |
| 1746562282        | 1956        | 1956        | The Best Things in Life Are Free      | The Best Things in Life Are Free      | Curtiz, Michael                     | Michael Curtiz          | tt0049002        |
| 1746516300        | 1920        | 1921        | Women Men Love                        | Women Men Love                        | Bradley, Samuel R.                  | Samuel R. Bradley       | tt0012863        |
| 1746473771        | 1944        | 1944        | The Mask of Dimitrios                 | The Mask of Dimitrios                 | Negulesco, Jean                     | Jean Negulesco          | tt0037055        |
| 1746483545        | 1917        | 1917        | Efficiency Edgar's Courtship          | Efficiency Edgar's Courtship          | Windom, L. C.                       | Lawrence C. Windom      | tt0007882        |
| 1746584190        | 1939        | 1939        | Boy Friend                            | Boy Friend                            | Tinling, James                      | James Tinling           | tt0031115        |
| 1746512140        | 1917        | 1917        | The Inevitable                        | The Inevitable                        | Goetz, Ben                          | Ben Goetz               | tt0176851        |
| 1746251507        | 1978        | 1978        | Goin' South                           | Goin' South                           | Nicholson, Jack                     | Jack Nicholson          | tt0077621        |
| 1746520990        | 1949        | 1949        | Red Rock Outlaw                       | Red Rock Outlaw                       | Pond, Elmer S.                      | Elmer Clifton           | tt0180089        |
| 1746583136        | 1940        | 1940        | Grand Ole Opry                        | Grand Ole Opry                        | McDonald, Frank                     | Frank McDonald          | tt0032546        |
| 1746570263        | 1933        | 1933        | Blondie Johnson                       | Blondie Johnson                       | Enright, Ray                        | Ray Enright             | tt0023817        |
| 1746573465        | 1932        | 1932        | Westward Passage                      | Westward Passage                      | Milton, Robert                      | Robert Milton           | tt0023684        |
| 1746577816        | 1936        | 1936        | Trail Dust                            | Trail Dust                            | Watt, Nate                          | Nate Watt               | tt0028400        |
| 1746573483        | 1932        | 1932        | Law of the North                      | Law of the North                      | Fraser, Harry                       | Harry L. Fraser         | tt0023122        |
| 1746584126        | 1936        | 1936        | The Law in Her Hands                  | The Law in Her Hands                  | Clemens, William                    | William Clemens         | tt0027875        |
| 1746475510        | 1943        | 1943        | Two-Fisted Justice                    | Two Fisted Justice                    | Tansey, Robert                      | Robert Emmett Tansey    | tt0036468        |
| 1746574591        | 1933        | 1933        | The Return of Casey Jones             | The Return of Casey Jones             | McCarthy, J. P.                     | John P. McCarthy        | tt0025711        |
| 1746464767        | 1942        | 1942        | Seven Days' Leave                     | Seven Days' Leave                     | Whelan, Tim                         | Tim Whelan              | tt0035307        |
| 1746198648        | 1968        | 1968        | Finian's Rainbow                      | Finian's Rainbow                      | Coppola, Francis Ford               | Francis Ford Coppola    | tt0062974        |
| 1746575817        | 1932        | 1932        | Almost Married                        | Almost Married                        | Menzies, William Cameron; Varnel, P | William Cameron Menzies | tt0022622        |
| 1746509231        | 1926        | 1926        | Secret Orders                         | Secret Orders                         | Withey, Chet                        | Chester Withey          | tt0017361        |
| 1746464875        | 1945        | 1945        | South of the Rio Grande               | South of the Rio Grande               | Hillyer, Lambert                    | Lambert Hillyer         | tt0038106        |
| 1746561574        | 1954        | 1954        | The Vanishing Prairie                 | The Vanishing Prairie                 | Algar, James                        | James Algar             | tt0047642        |
| 1746523045        | 1916        | 1916        | A Million for Mary                    | A Million for Mary                    | Berger, Rea                         | Rae Berger              | tt0007066        |
| 1746465284        | 1947        | 1947        | Robin Hood of Monterey                | Robin Hood of Monterey                | Cabanne, Christy                    | Christy Cabanne         | tt0039779        |
| 1745309425        | 2006        | 2006        | Crank                                 | Crank                                 | Nevelidine, Mark ; Taylor, Brian    | Mark Nevelidine         | tt0479884        |
| 1746516144        | 1921        | 1921        | Penny of Top Hill Trail               | Penny of Top Hill Trail               | Berthelet, Arthur                   | Arthur Berthelet        | tt0011566        |
| 1746500578        | 1926        | 1926        | A Man of Quality                      | A Man of Quality                      | Ruggles, Wesley                     | Wesley Ruggles          | tt0017114        |
| 1746502416        | 1916        | 1916        | Sweet Kitty Bellairs                  | Sweet Kitty Bellairs                  | Young, James                        | James Young             | tt0007421        |
| 1746409474        | 1992        | 1992        | One False Move                        | One False Move                        | Franklin, Carl                      | Carl Franklin           | tt0102592        |
| 1746235215        | 1972        | 1972        | Dr. Phibes Rises Again                | Dr. Phibes Rises Again                | Fuest, Robert                       | Robert Fuest            | tt0068503        |
| 1746584296        | 1939        | 1939        | Sundown on the Prairie                | Sundown on the Prairie                | Herman, Al                          | Albert Herman           | tt0031993        |
| 1746504192        | 1921        | 1921        | Who Am I?                             | Who Am I?                             | Kolker, Henry                       | Henry Kolker            | tt0012845        |
| 1746508242        | 1925        | 1924        | Secrets of the Night                  | Secrets of the Night                  | Blaché, Herbert                     | Herbert Blaché          | tt0015313        |
| 1746555299        | 1956        | 1956        | Helen of Troy                         | Helen of Troy                         | Wise, Robert                        | Robert Wise             | tt0049301        |
| 1746234524        | 1967        | 1967        | Banning                               | Banning                               | Winston, Ron                        | Ron Winston             | tt0061383        |
| 1746419779        | 1994        | 1994        | Car 54, Where Are You?                | Car 54, Where Are You?                | Fishman, Bill                       | Bill Fishman            | tt0109376        |
| 1746578918        | 1950        | 1950        | Streets of Ghost Town                 | Streets of Ghost Town                 | Nazarro, Ray                        | Ray Nazarro             | tt0043007        |
| <b>1746583374</b> | <b>1930</b> | <b>1930</b> | <b>Young Desire</b>                   | <b>Young Desire</b>                   | <b>Collins, Lew</b>                 | <b>Lewis D. Collins</b> | <b>tt0021566</b> |
| 1769975297        | 1917        | 1918        | Busted Hearts and Buttermilk          | Busted Hearts and Buttermilk          |                                     | Al Christie             | tt0344981        |
| 1746499988        | 1948        | 1947        | A Double Life                         | A Double Life                         | Cukor, George                       | George Cukor            | tt0039335        |
| 1746583293        | 1951        | 1951        | Follow the Sun                        | Follow the Sun                        | Lanfield, Sidney                    | Sidney Lanfield         | tt0043550        |
| 1746499979        | 1924        | 1924        | Man from God's Country                | Man from God's Country                | Neitz, Alvin J.                     | Alan James              | tt0015113        |
| 1746507730        | 1926        | 1926        | Fightin' Jack                         | Fightin' Jack                         | Chaudet, Louis                      | Louis Chaudet           | tt0016862        |
| 1746453771        | 1944        | 1944        | Cobra Woman                           | Cobra Woman                           | Siodmak, Robert                     | Robert Siodmak          | tt0036716        |
| 1745309153        | 2005        | 2005        | Cheaper by the Dozen 2                | Cheaper by the Dozen 2                | Shankman, Adam                      | Adam Shankman           | tt0452598        |

1

1

|            |      |      |                                 |                                 |                      |                     |           |
|------------|------|------|---------------------------------|---------------------------------|----------------------|---------------------|-----------|
| 1746584491 | 1931 | 1931 | Three Who Loved                 | Three Who Loved                 | Archainbaud, George  | George Archainbaud  | tt0022481 |
| 1746234797 | 1967 | 1966 | Death Curse of Tartu            | Death Curse of Tartu            | Grefé, William       | William Grefé       | tt0060290 |
| 1746533198 | 1915 | 1915 | The White Sister                | The White Sister                | Wright, Fred E.      | Fred E. Wright      | tt0006281 |
| 1746571485 | 1932 | 1932 | Rockabye                        | Rockabye                        | Cukor, George        | George Cukor        | tt0024506 |
| 1746497236 | 1918 | 1918 | The Whispering Chorus           | The Whispering Chorus           | DeMille, Cecil B.    | Cecil B. DeMille    | tt0009796 |
| 1746570745 | 1933 | 1933 | The Kiss Before the Mirror      | The Kiss Before the Mirror      | Whale, James         | James Whale         | tt0024222 |
| 1746500199 | 1925 | 1925 | Sealed Lips                     | Sealed Lips                     | Gaudio, Antonio      | Tony Gaudio         | tt0016326 |
| 1746217659 | 1966 | 1966 | The Cat                         | The Cat                         | Kadison, Ellis       | Ellis Kadison       | tt0060221 |
| 1746570414 | 1934 | 1934 | Bachelor Bait                   | Bachelor Bait                   | Stevens, George      | George Stevens      | tt0024855 |
| 1746257210 | 1977 | 1977 | Black Oak Conspiracy            | Black Oak Conspiracy            | Kelljan, Bob         | Bob Kelljan         | tt0075763 |
| 1746577748 | 1933 | 1933 | Deadwood Pass                   | Deadwood Pass                   | McGowan, J. P.       | J.P. McGowan        | tt0023934 |
| 1769970449 | 1967 | 1967 | The Playpen                     | The Playpen                     | St. Thomas, Warren   | Warren St. Thomas   | tt0148621 |
| 1746500306 | 1924 | 1924 | The Storm Daughter              | The Storm Daughter              | Archainbaud, George  | George Archainbaud  | tt0015370 |
| 1746520353 | 1925 | 1925 | The Mystic                      | The Mystic                      | Browning, Tod        | Tod Browning        | tt0016142 |
| 1746570718 | 1933 | 1933 | The Solitaire Man               | The Solitaire Man               | Conway, Jack         | Jack Conway         | tt0024590 |
| 1746532419 | 1922 | 1922 | The Fighting Ranger             | The Fighting Ranger             |                      |                     | tt0325374 |
| 1746422146 | 1994 | 1994 | Sleep with Me                   | Sleep with Me                   | Kelly, Rory          | Rory Kelly          | tt0111218 |
| 1746435333 | 1998 | 1998 | Chairman of the Board           | Chairman of the Board           | Zamm, Alex           | Alex Zamm           | tt0118836 |
| 1746585467 | 1939 | 1939 | Irish Luck                      | Irish Luck                      | Bretherton, Howard   | Howard Bretherton   | tt0031495 |
| 1746583003 | 1940 | 1940 | Women Without Names             | Women Without Names             | Florey, Robert       | Robert Florey       | tt0033272 |
| 1746474821 | 1945 | 1944 | Of One Blood                    | Of One Blood                    | Williams, Spencer    | Spencer Williams    | tt0029330 |
| 1746576726 | 1932 | 1932 | While Paris Sleeps              | While Paris Sleeps              | Dwan, Allan          | Allan Dwan          | tt0023691 |
| 1746524308 | 1923 | 1923 | Little Church Around the Corner | Little Church Around the Corner | Seiter, William A.   | William A. Seiter   | tt0014202 |
| 1746572315 | 1932 | 1932 | Bring 'Em Back Alive            | Bring 'Em Back Alive            | Elliott, Clyde E.    | Clyde E. Elliott    | tt0023843 |
| 1746257446 | 1978 | 1978 | Renaldo & Clara                 | Renaldo and Clara               | Dylan, Bob           | Bob Dylan           | tt0078151 |
| 1746199284 | 1969 | 1969 | The Royal Hunt of the Sun       | The Royal Hunt of the Sun       | Lerner, Irving       | Irving Lerner       | tt0064907 |
| 1746497271 | 1920 | 1920 | The City of Masks               | The City of Masks               | Heffron, Thomas N.   | Thomas N. Heffron   | tt0011060 |
| 1746550259 | 1955 | 1955 | Violent Saturday                | Violent Saturday                | Fleischer, Richard   | Richard Fleischer   | tt0048790 |
| 1746491719 | 1946 | 1946 | Rolling Home                    | Rolling Home                    | Berke, William       | William Berke       | tt0039782 |
| 1746573868 | 1958 | 1958 | Man or Gun                      | Man or Gun                      | Gannaway, Albert C.  | Albert C. Gannaway  | tt0051901 |
| 1746578015 | 1937 | 1937 | Bulldog Drummond Escapes        | Bulldog Drummond Escapes        | Hogan, James         | James P. Hogan      | tt0028668 |
| 1746434328 | 1999 | 1998 | Relax... It's Just Sex          | Relax... It's Just Sex          | Castellaneta, P. J.  | P.J. Castellaneta   | tt0159696 |
| 1746577211 | 1950 | 1950 | No Sad Songs for Me             | No Sad Songs for Me             | Maté, Rudolph        | Rudolph Maté        | tt0042790 |
| 1746567440 | 1932 | 1932 | Cornered                        | Cornered                        | Eason, Reeves        | B. Reeves Eason     | tt0023908 |
| 1746520688 | 1925 | 1925 | Rough Stuff                     | Rough Stuff                     | Henderson, Dell      | Dell Henderson      | tt0158903 |
| 1746549847 | 1954 | 1954 | Woman's World                   | Woman's World                   | Negulesco, Jean      | Jean Negulesco      | tt0047680 |
| 1746492480 | 1948 | 1948 | The Main Street Kid             | The Main Street Kid             | Springsteen, R. G.   | R.G. Springsteen    | tt0040563 |
| 1746475898 | 1945 | 1945 | The Jungle Captive              | The Jungle Captive              | Young, Harold        | Harold Young        | tt0037837 |
| 1746550114 | 1955 | 1955 | Man with the Gun                | Man with the Gun                | Wilson, Richard      | Richard Wilson      | tt0048339 |
| 1746553659 | 1964 | 1964 | Bikini Beach                    | Bikini Beach                    | Asher, William       | William Asher       | tt0057887 |
| 1746504759 | 1920 | 1920 | Jack Straw                      | Jack Straw                      | de Mille, William C. | William C. de Mille | tt0011343 |
| 1746574467 | 1952 | 1952 | Lydia Bailey                    | Lydia Bailey                    | Negulesco, Jean      | Jean Negulesco      | tt0044861 |
| 1746219133 | 1971 | 1971 | The Steagle                     | The Steagle                     | Sylbert, Paul        | Paul Sylbert        | tt0067792 |
| 1746438780 | 1998 | 1998 | Hi-Life                         | Hi Life                         | Hedden, Roger        | Roger Hedden        | tt0132213 |
| 1745302681 | 2007 | 2007 | The Savages                     | The Savages                     | Jenkins, Tamara      | Tamara Jenkins      | tt0775529 |
| 1746582530 | 1939 | 1939 | The Bronze Buckaroo             | The Bronze Buckaroo             | Kahn, Richard C.     | Richard C. Kahn     | tt0031122 |
| 1746569847 | 1959 | 1959 | The Man in the Net              | The Man in the Net              | Curtiz, Michael      | Michael Curtiz      | tt0053045 |
| 1746513383 | 1914 | 1914 | The Man from Mexico             | The Man from Mexico             | Heffron, Thomas N.   | Thomas N. Heffron   | tt0004295 |
| 1746579036 | 1964 | 1963 | The Comedy of Terrors           | The Comedy of Terrors           | Tourneur, Jacques    | Jacques Tourneur    | tt0056943 |
| 1746524750 | 1923 | 1923 | Deceit                          | Deceit                          | Micheaux, Oscar      | Oscar Micheaux      | tt0013980 |
| 1746581954 | 1928 | 1928 | The Smart Set                   | The Smart Set                   | Conway, Jack         | Jack Conway         | tt0019400 |
| 1746532640 | 1915 | 1915 | Heritage                        | Heritage                        | Leonard, Robert      | Robert Z. Leonard   | tt0005480 |
| 1746484203 | 1917 | 1918 | Whose Wife?                     | Whose Wife?                     | Sturgeon, Rollin S.  | Al Christie         | tt0436959 |
| 1746571114 | 1935 | 1935 | Shadow of Doubt                 | Shadow of Doubt                 | Seitz, George B.     | George B. Seitz     | tt0026980 |
| 1746583328 | 1928 | 1928 | Faithless Lover                 | Faithless Lover                 | Windom, Lawrence     | Lawrence C. Windom  | tt0018872 |
| 1746564328 | 1953 | 1953 | Calamity Jane                   | Calamity Jane                   | Butler, David        | David Butler        | tt0045591 |
| 1746503573 | 1920 | 1919 | Haunting Shadows                | Haunting Shadows                | King, Henry          | Henry King          | tt0010216 |

|            |      |      |                                             |                                          |                                   |                      |           |
|------------|------|------|---------------------------------------------|------------------------------------------|-----------------------------------|----------------------|-----------|
| 1746576321 | 1931 | 1931 | Men Call It Love                            | Men Call It Love                         | Selwyn, Edgar                     | Edgar Selwyn         | tt0022135 |
| 1746504338 | 1918 | 1918 | Hitting the High Spots                      | Hitting the High Spots                   | Swickard, Charles                 | Charles Swickard     | tt0184577 |
| 1746409460 | 1987 | 1987 | A Nightmare on Elm Street 3: Dream Warriors | A Nightmare on Elm Street 3: Dream Warri | Russell, Chuck                    | Chuck Russell        | tt0093629 |
| 1746577126 | 1961 | 1961 | The Last Time I Saw Archie                  | The Last Time I Saw Archie               | Webb, Jack                        | Jack Webb            | tt0055074 |
| 1746509053 | 1949 | 1949 | Sand                                        | Sand                                     | King, Louis                       | Louis King           | tt0041840 |
| 1746421348 | 1990 | 1990 | Cry-Baby                                    | Cry Baby                                 | Waters, John                      | John Waters          | tt0099329 |
| 1746584196 | 1936 | 1936 | Shakedown                                   | Shakedown                                | Selman, David                     | David Selman         | tt0028244 |
| 1746392827 | 1982 | 1982 | The Sword and the Sorcerer                  | The Sword and the Sorcerer               | Pyun, Albert                      | Albert Pyun          | tt0084749 |
| 1746570318 | 1934 | 1934 | Gift of Gab                                 | Gift of Gab                              | Freund, Karl                      | Karl Freund          | tt0025170 |
| 1746578749 | 1951 | 1951 | The Lady Pays Off                           | The Lady Pays Off                        | Sirk, Douglas                     | Douglas Sirk         | tt0043720 |
| 1746394771 | 1991 | 1991 | Oscar                                       | Oscar                                    | Landis, John                      | John Landis          | tt0102603 |
| 1746569894 | 1958 | 1958 | The Man Who Died Twice                      | The Man Who Died Twice                   | Kane, Joe                         | Joseph Kane          | tt0051895 |
| 1746439087 | 1996 | 1996 | Larger Than Life                            | Larger Than Life                         | Franklin, Howard                  | Howard Franklin      | tt0116823 |
| 1746434372 | 1989 | 1989 | Cousins                                     | Cousins                                  | Schumacher, Joel                  | Joel Schumacher      | tt0097116 |
| 1746580735 | 1937 | 1937 | She's Dangerous                             | She's Dangerous                          | Foster, Lewis R.; Carruth, Milton | Milton Carruth       | tt0028246 |
| 1746218743 | 1976 | 1976 | Death Machines                              | Death Machines                           | Kyriazi, Paul                     | Paul Kyriazi         | tt0074383 |
| 1746574456 | 1935 | 1935 | Old Man Rhythm                              | Old Man Rhythm                           | Ludwig, Edward                    | Edward Ludwig        | tt0026811 |
| 1746453829 | 1943 | 1943 | After Midnight with Boston Blackie          | After Midnight with Boston Blackie       | Landers, Lew                      | Lew Landers          | tt0035615 |
| 1769973132 | 1924 | 1924 | Her Boy Friend                              | Her Boy Friend                           | Smith, Noel Mason                 | Larry Semon          | tt0248078 |
| 1746436253 | 1997 | 1997 | Masterminds                                 | Masterminds                              | Christian, Roger                  | Roger Christian      | tt0119630 |
| 1746393392 | 1984 | 1984 | Beat Street                                 | Beat Street                              | Lathan, Stan                      | Stan Lathan          | tt0086946 |
| 1746211502 | 1972 | 1972 | Sleuth                                      | Sleuth                                   | Mankiewicz, Joseph L.             | Joseph L. Mankiewicz | tt0069281 |
| 1746453773 | 1943 | 1943 | Flight for Freedom                          | Flight for Freedom                       | Mendes, Lothar                    | Lothar Mendes        | tt0035888 |
| 1746500541 | 1925 | 1925 | Jimmie's Millions                           | Jimmie's Millions                        | Hogan, James P.                   | James P. Hogan       | tt0135483 |
| 1746569805 | 1958 | 1958 | The Quiet American                          | The Quiet American                       | Mankiewicz, Joseph L.             | Joseph L. Mankiewicz | tt0052106 |
| 1745342280 | 2002 | 2001 | Never Again                                 | Never Again                              | Schaeffer, Eric                   | Eric Schaeffer       | tt0244094 |
| 1746581694 | 1928 | 1928 | The Showdown                                | The Showdown                             | Schertzinger, Victor              | Victor Schertzinger  | tt0019380 |
| 1746498297 | 1922 | 1922 | A Pasteboard Crown                          | A Pasteboard Crown                       | Vale, Travers                     | Travers Vale         | tt0013483 |
| 1746256783 | 1977 | 1977 | The Kentucky Fried Movie                    | The Kentucky Fried Movie                 | Landis, John                      | John Landis          | tt0076257 |
| 1746422262 | 1997 | 1997 | Rocketman                                   | RocketMan                                | Gillard, Stuart                   | Stuart Gillard       | tt0120029 |
| 1746553881 | 1964 | 1964 | Rio Conchos                                 | Rio Conchos                              | Douglas, Gordon                   | Gordon Douglas       | tt0058525 |
| 1769970843 | 1915 | 1915 | Mixed and Fixed                             | Mixed and Fixed                          |                                   | Bobby Burns          | tt0269558 |
| 1746208445 | 1969 | 1969 | Scream, Baby, Scream                        | Scream Baby Scream                       | Adler, Joseph                     | Joseph Adler         | tt0064950 |
| 1746454369 | 1941 | 1941 | Confirm or Deny                             | Confirm or Deny                          | Mayo, Archie; Lang, Fritz         | Archie Mayo          | tt0033486 |
| 1746580768 | 1938 | 1938 | Little Tough Guys in Society                | Little Tough Guys in Society             | Kenton, Erle C.                   | Erle C. Kenton       | tt0030379 |
| 1746502118 | 1914 | 1914 | Aftermath                                   | The Aftermath                            |                                   | Sydney Ayres         | tt0214456 |
| 1746504057 | 1921 | 1921 | Puppets of Fate                             | Puppets of Fate                          | Fitzgerald, Dallas M.             | Dallas M. Fitzgerald | tt0012597 |
| 1746572308 | 1932 | 1932 | Sin's Pay Day                               | Sin's Pay Day                            | Seitz, George B.                  | George B. Seitz      | tt0023475 |
| 1746422031 | 1994 | 1994 | Forrest Gump                                | Forrest Gump                             | Zemeckis, Robert                  | Robert Zemeckis      | tt0109830 |
| 1746393649 | 1986 | 1986 | Peggy Sue Got Married                       | Peggy Sue Got Married                    | Coppola, Francis                  | Francis Ford Coppola | tt0091738 |
| 1746542633 | 1925 | 1925 | The Hurricane Kid                           | The Hurricane Kid                        | Sedgwick, Edward                  | Edward Sedgwick      | tt0015934 |
| 1746436381 | 1940 | 1940 | A Fugitive from Justice                     | A Fugitive from Justice                  | Morse, Terry                      | Terry O. Morse       | tt0032499 |
| 1746486808 | 1920 | 1920 | The Perfect Woman                           | The Perfect Woman                        | Kirkland, David                   | David Kirkland       | tt0011567 |
| 1746573855 | 1959 | 1959 | The Rebel Set                               | The Rebel Set                            | Fowler, Gene                      | Gene Fowler Jr.      | tt0053213 |
| 1746520517 | 1927 | 1927 | A Sailor's Sweetheart                       | A Sailor's Sweetheart                    | Bacon, Lloyd                      | Lloyd Bacon          | tt0018355 |
| 1745342070 | 2009 | 2009 | The Men Who Stare at Goats                  | The Men Who Stare at Goats               | Heslov, Grant                     | Grant Heslov         | tt1234548 |
| 1746475529 | 1947 | 1947 | Bandits of Dark Canyon                      | Bandits of Dark Canyon                   | Ford, Philip                      | Philip Ford          | tt0039173 |
| 1746436652 | 1943 | 1943 | Sherlock Holmes Faces Death                 | Sherlock Holmes Faces Death              | Neill, Roy William                | Roy William Neill    | tt0036348 |
| 1746257161 | 1975 | 1975 | Apple Pie                                   | Apple Pie                                | Goldberg, Howard                  | Howard Goldberg      | tt0074149 |
| 1746475278 | 1946 | 1946 | Shock                                       | Shock                                    | Werker, Alfred                    | Alfred L. Werker     | tt0038937 |
| 1746578056 | 1938 | 1938 | Swing Sister Swing                          | Swing, Sister, Swing                     | Santley, Joseph                   | Joseph Santley       | tt0030821 |
| 1746583686 | 1929 | 1929 | Paris                                       | Paris                                    | Badger, Clarence                  | Clarence G. Badger   | tt0020257 |
| 1746496073 | 1919 | 1919 | For a Woman's Honor                         | For a Woman's Honor                      | Frame, Park                       | Park Frame           | tt0010139 |
| 1746500413 | 1926 | 1926 | The Fighting Failure                        | The Fighting Failure                     | Boyle, E. G.                      | Edward G. Boyle      | tt0016861 |
| 1746582241 | 1929 | 1929 | The Saturday Night Kid                      | The Saturday Night Kid                   | Sutherland, Edward                | A. Edward Sutherland | tt0020364 |
| 1746453471 | 1943 | 1943 | West of Texas                               | West of Texas                            | Drake, Oliver                     | Oliver Drake         | tt0036522 |
| 1746520671 | 1950 | 1950 | Fortunes of Captain Blood                   | Fortunes of Captain Blood                | Douglas, Gordon                   | Gordon Douglas       | tt0042474 |



|            |      |      |                              |                              |                             |                                     |           |
|------------|------|------|------------------------------|------------------------------|-----------------------------|-------------------------------------|-----------|
| 1746515816 | 1921 | 1921 | Dead or Alive                | Dead or Alive                | Henderson, Dell             | Dell Henderson                      | tt0264517 |
| 1746198055 | 1969 | 1969 | Tell Them Willie Boy Is Here | Tell Them Willie Boy Is Here | Polonsky, Abraham           | Abraham Polonsky                    | tt0065079 |
| 1746486492 | 1918 | 1918 | Men Who Have Made Love to Me | Men Who Have Made Love to Me | Berthelet, Arthur           | Arthur Berthelet                    | tt0186344 |
| 1769973336 | 1970 | 1970 | Substitution                 | Substitution                 | Davis, Walt                 | Walt Davis                          | tt0149207 |
| 1746501393 | 1916 | 1916 | The Eagle's Wing             | The Eagle's Wings            | Steele, Rufus               | Robert Z. Leonard                   | tt0006620 |
| 1746483434 | 1917 | 1917 | Bucking Broadway             | Bucking Broadway             | Ford, Jack                  | John Ford                           | tt0007755 |
| 1745359877 | 2008 | 2008 | Beautiful Losers             | Beautiful Losers             | Rose, Aaron                 | Aaron Rose                          | tt0430916 |
| 1746512408 | 1922 | 1922 | The Desert's Crucible        | The Desert's Crucible        | Clements, Roy               | Roy Clements                        | tt0013061 |
| 1746554657 | 1964 | 1964 | Voice of the Hurricane       | Voice of the Hurricane       | Fraser, George              | George Fraser                       | tt0180291 |
| 1746210031 | 1970 | 1970 | Rio Lobo                     | Rio Lobo                     | Hawks, Howard               | Howard Hawks                        | tt0066301 |
| 1746515585 | 1921 | 1921 | Chickens                     | Chickens                     | Nelson, Jack                | Jack Nelson                         | tt0012044 |
| 1746500858 | 1916 | 1916 | The Faded Flower             | The Faded Flower             | Abramson, Ivan              | Ivan Abramson                       | tt0157609 |
| 1746198536 | 1966 | 1966 | The Embracers                | The Embracers                | Graver, Gary                | Gary Graver                         | tt0178403 |
| 1746500448 | 1925 | 1925 | The Golden Princess          | The Golden Princess          | Badger, Clarence            | Clarence G. Badger                  | tt0015869 |
| 1746453550 | 1942 | 1942 | King of the Stallions        | King of the Stallions        | Finney, Edward              | Edward Finney                       | tt0034945 |
| 1746582380 | 1928 | 1928 | Golf Widows                  | Golf Widows                  | Kenton, Erle C.             | Erle C. Kenton                      | tt0018949 |
| 1746423819 | 1940 | 1940 | Oklahoma Renegades           | Oklahoma Renegades           | Watt, Nate                  | Nate Watt                           | tt0032859 |
| 1746455783 | 1996 | 1996 | Sgt. Bilko                   | Sgt. Bilko                   | Lynn, Jonathan              | Jonathan Lynn                       | tt0117608 |
| 1769970780 | 1912 | 1912 | The Dumb Wooing              | The Dumb Wooing              |                             | Will Louis                          | tt0002150 |
| 1746577999 | 1937 | 1937 | Tough to Handle              | Tough to Handle              | Luby, Roy                   | S. Roy Luby                         | tt0165992 |
| 1746464999 | 1947 | 1947 | Hard Boiled Mahoney          | Hard Boiled Mahoney          | Beaudine, William           | William Beaudine                    | tt0039447 |
| 1746555276 | 1955 | 1955 | The Rains of Ranchipur       | The Rains of Ranchipur       | Negulesco, Jean             | Jean Negulesco                      | tt0048538 |
| 1746523276 | 1915 | 1915 | The Sable Lorch              | The Sable Lorch              | Ingraham, Lloyd             | Lloyd Ingraham                      | tt0005997 |
| 1746422312 | 1993 | 1993 | Bodies, Rest & Motion        | Bodies, Rest & Motion        | Steinberg, Michael          | Michael Steinberg                   | tt0106447 |
| 1746453504 | 1944 | 1944 | Nevada                       | Nevada                       | Killy, Edward               | Edward Killy                        | tt0037124 |
| 1746530754 | 1949 | 1948 | 3 Godfathers                 | 3 Godfathers                 | Ford, John                  | John Ford                           | tt0040064 |
| 1746508693 | 1949 | 1949 | Mississippi Rhythm           | Mississippi Rhythm           | Abrahams, Derwin            | Derwin Abrahams                     | tt0041656 |
| 1746573882 | 1960 | 1961 | Runaway                      | The Runaway                  | Kone, Elliot H.             | Claudio Guzmán                      | tt0201048 |
| 1746584849 | 1929 | 1929 | Illusion of Love             | Illusion of Love             |                             |                                     | tt0361737 |
| 1746520212 | 1924 | 1924 | Reckless Riding Bill         | Reckless Riding Bill         | Morrow, Frank               | Frank Morrow                        | tt0015264 |
| 1746583886 | 1930 | 1930 | Love in the Rough            | Love in the Rough            | Reisner, Charles F.         | Charles Reisner                     | tt0021100 |
| 1746464876 | 1942 | 1942 | Riders of the Northland      | Riders of the Northland      | Berke, William              | William Berke                       | tt0035253 |
| 1746585208 | 1928 | 1928 | Fandango                     | Fandango                     | George, Henry W.            | Lupino Lane                         | tt0256021 |
| 1746575039 | 1934 | 1934 | The Great Flirtation         | The Great Flirtation         | Murphy, Ralph               | Ralph Murphy                        | tt0025203 |
| 1746219397 | 1975 | 1975 | Crazy Mama                   | Crazy Mama                   | Demme, Jonathan             | Jonathan Demme                      | tt0072829 |
| 1746455537 | 1999 | 1999 | Trippin'                     | Trippin'                     | Raynr, David                | David Raynr                         | tt0160298 |
| 1746503875 | 1918 | 1918 | The Panther Woman            | The Panther Woman            | Ince, Ralph                 | Ralph Ince                          | tt0009477 |
| 1746465086 | 1944 | 1944 | Faces in the Fog             | Faces in the Fog             | English, John               | John English                        | tt0036808 |
| 1746211243 | 1971 | 1971 | Private Duty Nurses          | Private Duty Nurses          | Armitage, George            | George Armitage                     | tt0067618 |
| 1746184904 | 1965 | 1965 | The Satan Bug                | The Satan Bug                | Sturges, John               | John Sturges                        | tt0059678 |
| 1746572046 | 1932 | 1932 | Guilty As Hell               | Guilty as Hell               | Kenton, Erle C.             | Erle C. Kenton                      | tt0022967 |
| 1746492755 | 1948 | 1948 | Let's Live a Little          | Let's Live a Little          | Wallace, Richard            | Richard Wallace                     | tt0040535 |
| 1746514720 | 1913 | 1913 | Buried Alive in a Coal Mine  | Buried Alive in a Coal Mine  |                             | Albert W. Hale                      | tt0002725 |
| 1746571639 | 1910 | 1910 | The Cowboy's Mother-in-Law   | A Cowboy's Mother in Law     |                             | Gilbert M. 'Broncho Billy' Anderson | tt0001168 |
| 1746198432 | 1969 | 1969 | The Candy Man                | The Candy Man                |                             | Herbert J. Leder                    | tt0064125 |
| 1746208545 | 1966 | 1965 | The Spy With My Face         | The Spy with My Face         | Newland, John               | John Newland                        | tt0058610 |
| 1746520523 | 1924 | 1924 | Hot Water                    | Hot Water                    | Taylor, Sam; Newmeyer, Fred | Fred C. Newmeyer                    | tt0015002 |
| 1746577637 | 1935 | 1935 | Six Gun Justice              | Six Gun Justice              |                             | Robert F. Hill                      | tt0027006 |
| 1746542652 | 1924 | 1924 | Inez From Hollywood          | Inez from Hollywood          | Green, Alfred E.            | Alfred E. Green                     | tt0015013 |
| 1746583220 | 1951 | 1951 | Overland Telegraph           | Overland Telegraph           | Selander, Lesley            | Lesley Selander                     | tt0043891 |
| 1746576728 | 1932 | 1932 | Divorce in the Family        | Divorce in the Family        | Riesner, Charles F.         | Charles Reisner                     | tt0022824 |
| 1746584067 | 1937 | 1937 | That Man's Here Again        | That Man's Here Again        | King, Louis                 | Louis King                          | tt0029652 |
| 1746497060 | 1919 | 1919 | The Lady of Red Butte        | The Lady of Red Butte        | Schertzinger, Victor L.     | Victor Schertzinger                 | tt0190518 |
| 1746487866 | 1919 | 1919 | The Undercurrent             | The Undercurrent             | North, Wilfrid              | Wilfrid North                       | tt0010819 |
| 1746570323 | 1934 | 1934 | Shoot the Works              | Shoot the Works              | Ruggles, Wesley             | Wesley Ruggles                      | tt0025784 |
| 1746474987 | 1945 | 1945 | Over 21                      | Over 21                      | Vidor, Charles              | Charles Vidor                       | tt0037966 |
| 1746576867 | 1931 | 1931 | Children of Dreams           | Children of Dreams           | Crosland, Alan              | Alan Crosland                       | tt0021740 |

|            |      |      |                                             |                                             |                                     |                        |           |
|------------|------|------|---------------------------------------------|---------------------------------------------|-------------------------------------|------------------------|-----------|
| 1746571024 | 1910 | 1910 | The Education of Elizabeth                  | The Education of Elizabeth                  |                                     | Sidney Olcott          | tt0397408 |
| 1746524654 | 1914 | 1914 | Neptune's Daughter                          | Neptune's Daughter                          | Brenon, Herbert                     | Herbert Brenon         | tt0004391 |
| 1745342498 | 2004 | 2004 | Welcome to Mooseport                        | Welcome to Mooseport                        | Petrie, Donald                      | Donald Petrie          | tt0361925 |
| 1746580919 | 1962 | 1962 | Days of Wine and Roses                      | Days of Wine and Roses                      | Edwards, Blake                      | Blake Edwards          | tt0055895 |
| 1746484081 | 1918 | 1918 | The Sunset Princess                         | The Sunset Princess                         | Hitchcock, Charles Webster; Cooper, | William S. Cooper      | tt0152660 |
| 1746502397 | 1916 | 1916 | The Strength of Donald Mckenzie             | The Strength of Donald McKenzie             | Russell, William; Prescott, Jack    | Jack Prescott          | tt0158997 |
| 1746508684 | 1926 | 1926 | Sweet Rosie O'Grady                         | Sweet Rosie O'Grady                         | Strayer, Frank R.                   | Frank R. Strayer       | tt0017445 |
| 1746577517 | 1933 | 1933 | Sitting Pretty                              | Sitting Pretty                              | Brown, Harry Joe                    | Harry Joe Brown        | tt0024570 |
| 1746582070 | 1951 | 1951 | South of Caliente                           | South of Caliente                           | Witney, William                     | William Witney         | tt0044063 |
| 1746574453 | 1935 | 1935 | Charlie Chan in Egypt                       | Charlie Chan in Egypt                       | King, Louis                         | Louis King             | tt0026197 |
| 1746577574 | 1936 | 1936 | Earthworm Tractors                          | Earthworm Tractors                          | Enright, Raymond                    | Ray Enright            | tt0027562 |
| 1746408692 | 1990 | 1990 | Ghost Dad                                   | Ghost Dad                                   | Poitier, Sidney                     | Sidney Poitier         | tt0099654 |
| 1746500402 | 1925 | 1925 | The Last Edition                            | The Last Edition                            | Johnson, Emory                      | Emory Johnson          | tt0016008 |
| 1746569961 | 1958 | 1958 | The Deep Six                                | The Deep Six                                | Maté, R.                            | Rudolph Maté           | tt0050298 |
| 1746524520 | 1916 | 1916 | Wanted -A Home                              | Wanted: A Home                              | Smalley, Phillips                   | Phillips Smalley       | tt0007535 |
| 1746453714 | 1995 | 1995 | Bad Boys                                    | Bad Boys                                    | Bay, Michael                        | Michael Bay            | tt0112442 |
| 1746582673 | 1936 | 1936 | The Crooked Trail                           | The Crooked Trail                           | Luby, S. Roy                        | S. Roy Luby            | tt0132909 |
| 1746583240 | 1929 | 1929 | Back From Shanghai                          | Back from Shanghai                          | Mason, Noel                         | Noel M. Smith          | tt0019669 |
| 1746502450 | 1915 | 1915 | The Wolf Man                                | The Wolf Man                                | Powell, Paul                        | Paul Powell            | tt0006299 |
| 1746454077 | 1940 | 1940 | Santa Fe Trail                              | Santa Fe Trail                              | Curtiz, Michael                     | Michael Curtiz         | tt0033021 |
| 1746580828 | 1936 | 1936 | Lawless Land                                | Lawless Land                                | Ray, Albert                         | Albert Ray             | tt0029125 |
| 1746419382 | 1982 | 1982 | Shoot the Moon                              | Shoot the Moon                              | Parker, Alan                        | Alan Parker            | tt0084675 |
| 1769974396 | 1916 | 1916 | Guardian Angels                             | Guardian Angels                             | Beaudine, William                   | William Beaudine       | tt0460218 |
| 1746577870 | 1936 | 1936 | The Luckiest Girl in the World              | The Luckiest Girl in the World              | Buzzell, Eddie                      | Edward Buzzell         | tt0027915 |
| 1746508547 | 1924 | 1924 | Daring Youth                                | Daring Youth                                | Beaudine, William                   | William Beaudine       | tt0014829 |
| 1746454611 | 1941 | 1941 | Murder on Lenox Avenue                      | Murder on Lenox Avenue                      | Dreifuss, Arthur                    | Arthur Dreifuss        | tt0033929 |
| 1746508535 | 1924 | 1924 | Fires Of Youth                              | Fires of Youth                              |                                     |                        | tt0325383 |
| 1746210596 | 1970 | 1970 | The Landlord                                | The Landlord                                | Ashby, Hal                          | Hal Ashby              | tt0065963 |
| 1746577892 | 1939 | 1939 | Gentleman from Arizona                      | The Gentleman from Arizona                  | Haley, Earl                         | Earl Haley             | tt0031363 |
| 1746515593 | 1920 | 1920 | Everybody's Sweetheart                      | Everybody's Sweetheart                      | Trimble, Laurence                   | Alan Crosland          | tt0143240 |
| 1746500267 | 1949 | 1949 | Jiggs and Maggie in Jackpot Jitters         | Jiggs and Maggie in Jackpot Jitters         | Beaudine, William                   | William Beaudine       | tt0041516 |
| 1769973127 | 1924 | 1924 | Fast and Furious                            | Fast and Furious                            | Taurog, Norman                      | Norman Taurog          | tt0247334 |
| 1746574908 | 1936 | 1936 | Cattle Thief                                | The Cattle Thief                            | Bennet, Spencer Gordon              | Spencer Gordon Bennet  | tt0027433 |
| 1746516497 | 1920 | 1920 | Judy of Rogue's Harbor                      | Judy of Rogue's Harbor                      | Taylor, William D.                  | William Desmond Taylor | tt0011356 |
| 1746422274 | 1999 | 1999 | Blast from the Past                         | Blast from the Past                         | Wilson, Hugh                        | Hugh Wilson            | tt0124298 |
| 1746438940 | 1943 | 1943 | The Sky's the Limit                         | The Sky's the Limit                         | Griffith, Edward H.                 | Edward H. Griffith     | tt0036363 |
| 1746507742 | 1926 | 1926 | Easy Going                                  | Easy Going                                  | Thorpe, Richard                     | Richard Thorpe         | tt0016818 |
| 1746218721 | 1974 | 1974 | It's Alive                                  | It's Alive                                  | Cohen, Larry                        | Larry Cohen            | tt0071675 |
| 1746580460 | 1935 | 1935 | Cheyenne Tornado                            | The Cheyenne Tornado                        | O'Connor, William                   | William A. O'Connor    | tt0132900 |
| 1746502910 | 1914 | 1914 | Joseph in the Land of Egypt                 | Joseph in the Land of Egypt                 | Moore, Eugene                       | Eugene Moore           | tt0004179 |
| 1746584932 | 1939 | 1939 | I Was a Convict                             | I Was a Convict                             | Scotto, Aubrey                      | Aubrey Scotto          | tt0031467 |
| 1746578922 | 1958 | 1958 | Stage Struck                                | Stage Struck                                | Lumet, Sidney                       | Sidney Lumet           | tt0052235 |
| 1746581581 | 1961 | 1961 | Flight of the Lost Balloon                  | Flight of the Lost Balloon                  |                                     | Nathan Juran           | tt0054883 |
| 1746576928 | 1951 | 1950 | Cyrano de Bergerac                          | Cyrano de Bergerac                          | Gordon, Michael                     | Michael Gordon         | tt0042367 |
| 1745359573 | 2003 | 2003 | Lara Croft Tomb Raider: The Cradle of Life  | Lara Croft Tomb Raider: The Cradle of Life  | de Bont, Jan                        | Jan de Bont            | tt0325703 |
| 1746250582 | 1975 | 1975 | One Flew Over the Cuckoo's Nest             | One Flew Over the Cuckoo's Nest             | Forman, Milos                       | Milos Forman           | tt0073486 |
| 1746509309 | 1925 | 1925 | The White Desert                            | The White Desert                            | Barker, Reginald                    | Reginald Barker        | tt0016523 |
| 1746570869 | 1933 | 1933 | The Working Man                             | The Working Man                             | Adolfi, John G.                     | John G. Adolfi         | tt0024785 |
| 1746569612 | 1957 | 1956 | Nightfall                                   | Nightfall                                   | Tourneur, Jacques                   | Jacques Tourneur       | tt0049552 |
| 1746513406 | 1923 | 1923 | Love's Old Sweet Song                       | Love's Old Sweet Song                       | Lund, Oscar                         | J. Searle Dawley       | tt0014222 |
| 1746577843 | 1936 | 1936 | Don't Turn 'Em Loose                        | Don't Turn 'em Loose                        | Stoloff, Ben                        | Benjamin Stoloff       | tt0027537 |
| 1746582200 | 1950 | 1950 | Stars in My Crown                           | Stars in My Crown                           | Tourneur, Jacques                   | Jacques Tourneur       | tt0042998 |
| 1746438090 | 1997 | 1997 | Austin Powers: International Man of Mystery | Austin Powers: International Man of Mystery | Roach, Jay                          | Jay Roach              | tt0118655 |
| 1745302599 | 2006 | 2005 | Looking for Comedy in the Muslim World      | Looking for Comedy in the Muslim World      | Brooks, Albert                      | Albert Brooks          | tt0433116 |
| 1745341017 | 2009 | 2009 | District 9                                  | District 9                                  | Blomkamp, Neill                     | Neill Blomkamp         | tt1136608 |
| 1746491877 | 1946 | 1946 | Dressed to Kill                             | Dressed to Kill                             | Neill, Roy William                  | Roy William Neill      | tt0038494 |
| 1746562005 | 1953 | 1953 | Martin Luther                               | Martin Luther                               | Pichel, Irving                      | Irving Pichel          | tt0046051 |

|            |      |      |                                    |                                    |                                   |                      |           |
|------------|------|------|------------------------------------|------------------------------------|-----------------------------------|----------------------|-----------|
| 1746507815 | 1926 | 1926 | Fascinating Youth                  | Fascinating Youth                  | Wood, Sam                         | Sam Wood             | tt0016844 |
| 1746439125 | 1941 | 1941 | Arizona Cyclone                    | Arizona Cyclone                    | Lewis, Joseph H.; Taylor, Ray     | Joseph H. Lewis      | tt0033352 |
| 1746525070 | 1920 | 1920 | The Mysteries of Paris             | The Mysteries of Paris             | Cornell, Ed                       | Ed Cornell           | tt0196774 |
| 1746585207 | 1930 | 1930 | Mamba                              | Mamba                              | Rogell, Albert                    | Albert S. Rogell     | tt0021109 |
| 1745358901 | 2008 | 2008 | Flash of Genius                    | Flash of Genius                    | Abraham, Marc                     | Marc Abraham         | tt1054588 |
| 1746497281 | 1918 | 1918 | Uncle Tom's Cabin                  | Uncle Tom's Cabin                  | Dawley, J. Searle                 | J. Searle Dawley     | tt0009741 |
| 1746582470 | 1935 | 1935 | Bulldog Courage                    | Bulldog Courage                    | Newfield, Sam                     | Sam Newfield         | tt0026157 |
| 1746465067 | 1942 | 1942 | The Adventures of Martin Eden      | The Adventures of Martin Eden      | Salkow, Sidney                    | Sidney Salkow        | tt0034431 |
| 1746577761 | 1933 | 1933 | Gambling Ship                      | Gambling Ship                      | Gasnier, Louis; Marcin, Max       | Louis J. Gasnier     | tt0024048 |
| 1746569524 | 1958 | 1958 | Party Girl                         | Party Girl                         | Ray, Nicholas                     | Nicholas Ray         | tt0052050 |
| 1746583068 | 1940 | 1940 | Colorado                           | Colorado                           | Kane, Joseph                      | Joseph Kane          | tt0032346 |
| 1746197980 | 1969 | 1969 | Butch Cassidy and the Sundance Kid | Butch Cassidy and the Sundance Kid | Hill, George Roy                  | George Roy Hill      | tt0064115 |
| 1746473659 | 1944 | 1944 | Dark Mountain                      | Dark Mountain                      | Berke, William                    | William Berke        | tt0036743 |
| 1746198660 | 1966 | 1966 | Run, Appaloosa, Run                | Run, Appaloosa, Run                | Lansburgh, Larry                  | Larry Lansburgh      | tt0249129 |
| 1746509457 | 1927 | 1927 | Matinee Ladies                     | Matinee Ladies                     | Haskin, Byron                     | Byron Haskin         | tt0018148 |
| 1746410727 | 1986 | 1986 | Gung Ho                            | Gung Ho                            | Howard, Ron                       | Ron Howard           | tt0091159 |
| 1746259897 | 1978 | 1978 | Malibu Beach                       | Malibu Beach                       | Rosenthal, Robert J.              | Robert J. Rosenthal  | tt0077895 |
| 1746475249 | 1947 | 1947 | The Vigilantes Return              | The Vigilantes Return              | Taylor, Ray                       | Ray Taylor           | tt0039958 |
| 1746563369 | 1951 | 1951 | Adventures of Captain Fabian       | Adventures of Captain Fabian       | Marshall, William; Florey, Robert | William Marshall     | tt0043264 |
| 1746502553 | 1915 | 1915 | Kilmeny                            | Kilmeny                            | Apfel, Oscar                      | Oscar Apfel          | tt0005588 |
| 1746577905 | 1935 | 1935 | Your Uncle Dudley                  | Your Uncle Dudley                  | Forde, Eugene                     | Eugene Forde         | tt0027236 |
| 1746419933 | 1994 | 1994 | The War                            | The War                            | Avnet, Jon                        | Jon Avnet            | tt0111667 |
| 1746574295 | 1960 | 1960 | A Touch of Larceny                 | A Touch of Larceny                 | Hamilton, Guy                     | Guy Hamilton         | tt0053371 |
| 1746585179 | 1929 | 1929 | Charming Sinners                   | Charming Sinners                   | Milton, Robert                    | Robert Milton        | tt0019758 |
| 1746571109 | 1933 | 1933 | The Big Brain                      | The Big Brain                      | Archainbaud, George               | George Archainbaud   | tt0023806 |
| 1745373784 | 2009 | 2009 | The Pink Panther 2                 | The Pink Panther 2                 | Zwart, Harald                     | Harald Zwart         | tt0838232 |
| 1746184062 | 1910 | 1910 | The Big Scoop                      | The Big Scoop                      | McGlynn, Frank                    | Frank McGlynn Sr.    | tt1520398 |
| 1746513823 | 1915 | 1915 | Mother's Roses                     | Mother's Roses                     | Marston, Theodore                 | Theodore Marston     | tt0005776 |
| 1746530802 | 1950 | 1950 | Belle of Old Mexico                | Belle of Old Mexico                | Springsteen, R. G.                | R.G. Springsteen     | tt0042237 |
| 1746582293 | 1930 | 1930 | Second Honeymoon                   | Second Honeymoon                   | Rosen, Phil                       | Phil Rosen           | tt0021349 |
| 1746577845 | 1938 | 1938 | Her Jungle Love                    | Her Jungle Love                    | Archainbaud, George               | George Archainbaud   | tt0030229 |
| 1745302382 | 2005 | 2005 | The Cave                           | The Cave                           | Hunt, Bruce                       | Bruce Hunt           | tt0402901 |
| 1746585474 | 1939 | 1939 | Pack Up Your Troubles              | Pack Up Your Troubles              | Humberstone, H. Bruce             | H. Bruce Humberstone | tt0031775 |
| 1746571218 | 1910 | 1910 | The Face at the Window             | The Face at the Window             | Griffith, D. W.                   | D.W. Griffith        | tt0001206 |
| 1745340107 | 2004 | 2004 | Catch That Kid                     | Catch That Kid                     | Freundlich, Bart                  | Bart Freundlich      | tt0337917 |
| 1746492233 | 1948 | 1948 | Isn't It Romantic                  | Isn't It Romantic?                 | McLeod, Norman Z.                 | Norman Z. McLeod     | tt0040479 |
| 1746561834 | 1956 | 1956 | Great Day in the Morning           | Great Day in the Morning           | Tourneur, Jacques                 | Jacques Tourneur     | tt0049278 |
| 1746573762 | 1961 | 1961 | Atlas                              | Atlas                              | Corman, Roger                     | Roger Corman         | tt0053610 |
| 1746420128 | 1993 | 1993 | Hot Shots! Part Deux               | Hot Shots! Part Deux               | Abrahams, Jim                     | Jim Abrahams         | tt0107144 |
| 1746483488 | 1917 | 1917 | The Hero of the Hour               | The Hero of the Hour               | Wells, Raymond                    | Raymond Wells        | tt0008088 |
| 1746562452 | 1953 | 1953 | Never Let Me Go                    | Never Let Me Go                    | Daves, Delmer                     | Delmer Daves         | tt0046124 |
| 1769970104 | 1912 | 1912 | A Doctor For an Hour               | A Doctor for an Hour               | Merwin, Bannister                 | C.J. Williams        | tt0441223 |
| 1746581992 | 1928 | 1928 | So This Is Love                    | So This Is Love                    | Capra, Frank                      | Frank Capra          | tt0019401 |
| 1746465344 | 1946 | 1946 | Gunman's Code                      | Gunman's Code                      | Fox, Wallace W.                   | Wallace Fox          | tt0038580 |
| 1746454943 | 1941 | 1941 | Citadel of Crime                   | Citadel of Crime                   | Sherman, George                   | George Sherman       | tt0033992 |
| 1746583097 | 1935 | 1935 | Big Calibre                        | Big Calibre                        | Bradbury, R. N.                   | Robert N. Bradbury   | tt0026114 |
| 1746393631 | 1986 | 1986 | Native Son                         | Native Son                         | Freedman, Jerrold                 | Jerrold Freedman     | tt0091613 |
| 1746574044 | 1961 | 1961 | West Side Story                    | West Side Story                    | Wise, Robert; Robbins, Jerome     | Jerome Robbins       | tt0055614 |
| 1746500873 | 1910 | 1910 | Red Fern and the Kid               | Red Fern and the Kid               |                                   | Fred J. Balshofer    | tt1392217 |
| 1746514966 | 1915 | 1915 | The Governor's Boss                | The Governor's Boss                |                                   | Charles E. Davenport | tt0005406 |
| 1746573974 | 1963 | 1963 | The Slime People                   | The Slime People                   | Hutton, Robert                    | Robert Hutton        | tt0056499 |
| 1746554665 | 1963 | 1963 | Summer Magic                       | Summer Magic                       | Neilson, James                    | James Neilson        | tt0057542 |
| 1746562451 | 1953 | 1953 | Escape from Fort Bravo             | Escape from Fort Bravo             | Sturges, John                     | John Sturges         | tt0045737 |
| 1746454686 | 1946 | 1946 | Under Arizona Skies                | Under Arizona Skies                | Hillyer, Lambert                  | Lambert Hillyer      | tt0039063 |
| 1746580591 | 1939 | 1939 | My Wife's Relatives                | My Wife's Relatives                | Meins, Gus                        | Gus Meins            | tt0031700 |
| 1746435173 | 1941 | 1941 | Honky Tonk                         | Honky Tonk                         | Conway, Jack                      | Jack Conway          | tt0033726 |
| 1746503625 | 1919 | 1919 | Victory                            | Victory                            | Tourneur, Maurice                 | Maurice Tourneur     | tt0010844 |

|            |      |      |                                      |                                      |                               |                        |           |
|------------|------|------|--------------------------------------|--------------------------------------|-------------------------------|------------------------|-----------|
| 1746585214 | 1930 | 1930 | The Swellhead                        | The Swellhead                        | Flood, James                  | James Flood            | tt0021444 |
| 1746569589 | 1958 | 1958 | Buchanan Rides Alone                 | Buchanan Rides Alone                 | Boetticher, Budd              | Budd Boetticher        | tt0051437 |
| 1746508411 | 1949 | 1949 | The Devil's Sleep                    | The Devil's Sleep                    | Connell, W. Merle             | W. Merle Connell       | tt0043466 |
| 1746524604 | 1914 | 1914 | Richelieu                            | Richelieu                            | Dwan, Allan                   | Allan Dwan             | tt0004532 |
| 1746569560 | 1957 | 1957 | The Helen Morgan Story               | The Helen Morgan Story               | Curtiz, Michael               | Michael Curtiz         | tt0050494 |
| 1746577333 | 1960 | 1960 | The Threat                           | The Threat                           | Rondeau, Charles R.           | Charles R. Rondeau     | tt0054383 |
| 1746466669 | 1917 | 1917 | Mayblossom                           | Mayblossom                           | José, Edward                  | Edward José            | tt0008282 |
| 1746509037 | 1925 | 1925 | Cheaper To Marry                     | Cheaper to Marry                     | Leonard, Robert Z.            | Robert Z. Leonard      | tt0015678 |
| 1746513066 | 1916 | 1916 | One Day                              | One Day                              | Clarendon, Hal                | Hal Clarendon          | tt0007146 |
| 1746582039 | 1928 | 1928 | Thundergod                           | Thundergod                           | Hunt, Charles J.              | Charles J. Hunt        | tt0019475 |
| 1746438316 | 1941 | 1941 | The Face Behind the Mask             | The Face Behind the Mask             | Florey, Robert                | Robert Florey          | tt0033582 |
| 1769974392 | 1916 | 1916 | Houses of Mystery                    | The House of Mystery                 |                               |                        | tt0479422 |
| 1746566332 | 1955 | 1955 | Dementia                             | Dementia                             | Parker, John                  | John Parker            | tt0047976 |
| 1746420555 | 1991 | 1991 | Problem Child 2                      | Problem Child 2                      | Levant, Brian                 | Brian Levant           | tt0102719 |
| 1746520146 | 1949 | 1949 | Act of Violence                      | Act of Violence                      | Zinnemann, Fred               | Fred Zinnemann         | tt0041088 |
| 1769976173 | 1928 | 1928 | Deaf, Dumb and Blonde                | Deaf, Dumb and Blonde                |                               | Leslie Goodwins        | tt1660525 |
| 1746568335 | 1933 | 1933 | He Couldn't Take It                  | He Couldn't Take It                  | Nigh, William                 | William Nigh           | tt0024094 |
| 1746530763 | 1950 | 1950 | The Lost Volcano                     | The Lost Volcano                     | Beebe, Ford                   | Ford Beebe             | tt0042686 |
| 1746503266 | 1919 | 1919 | Under Suspicion                      | Under Suspicion                      | Dowlan, William C.            | William C. Dowlan      | tt0010817 |
| 1746574649 | 1935 | 1935 | Big Boy Rides Again                  | Big Boy Rides Again                  | Herman, Albert                | Albert Herman          | tt0217869 |
| 1746464784 | 1946 | 1946 | Riverboat Rhythm                     | Riverboat Rhythm                     | Goodwins, Leslie              | Leslie Goodwins        | tt0038886 |
| 1746439077 | 1998 | 1997 | Star Kid                             | Star Kid                             | Coto, Manny                   | Manny Coto             | tt0120478 |
| 1746561059 | 1932 | 1932 | Tom Brown of Culver                  | Tom Brown of Culver                  | Wyler, William                | William Wyler          | tt0023601 |
| 1745272405 | 2000 | 2000 | Unbreakable                          | Unbreakable                          | Shyamalan, M. Night           | M. Night Shyamalan     | tt0217869 |
| 1746235272 | 1972 | 1972 | Shaft's Big Score!                   | Shaft's Big Score!                   | Parks, Gordon                 | Gordon Parks           | tt0069257 |
| 1746584284 | 1935 | 1935 | The New Adventures of Tarzan         | The New Adventures of Tarzan         | Kull, Edward; McLaugh, Wilbur | Edward A. Kull         | tt0026773 |
| 1746257378 | 1979 | 1979 | Time After Time                      | Time After Time                      | Meyer, Nicholas               | Nicholas Meyer         | tt0080025 |
| 1746483844 | 1917 | 1917 | Little Miss Optimist                 | Little Miss Optimist                 | Thornby, Robert               | Robert Thornby         | tt0008192 |
| 1746582611 | 1938 | 1938 | Nurse from Brooklyn                  | The Nurse from Brooklyn              | Simon, S. Sylvan              | S. Sylvan Simon        | tt0030515 |
| 1746502667 | 1915 | 1915 | The White Terror                     | The White Terror                     | Paton, Stuart                 | Stuart Paton           | tt0006282 |
| 1746439151 | 1942 | 1942 | Romance on the Range                 | Romance on the Range                 | Kane, Joseph                  | Joseph Kane            | tt0035266 |
| 1746584203 | 1940 | 1940 | Too Many Girls                       | Too Many Girls                       | Abbott, George                | George Abbott          | tt0033173 |
| 1746475508 | 1948 | 1948 | Scudda Hoo! Scudda Hay!              | Scudda Hoo! Scudda Hay!              | Herbert, F. Hugh              | F. Hugh Herbert        | tt0040762 |
| 1746232945 | 1969 | 1969 | Hell's Angels '69                    | Hell's Angels '69                    | Madden, Lee                   | Lee Madden             | tt0064415 |
| 1745341735 | 2003 | 2003 | Down with Love                       | Down with Love                       | Reed, Peyton                  | Peyton Reed            | tt0309530 |
| 1745341229 | 2001 | 2001 | Pearl Harbor                         | Pearl Harbor                         | Bay, Michael                  | Michael Bay            | tt0213149 |
| 1746581331 | 1959 | 1959 | Middle of the Night                  | Middle of the Night                  | Mann, Delbert                 | Delbert Mann           | tt0053065 |
| 1746566281 | 1958 | 1958 | Outcasts of the City                 | Outcasts of the City                 | Petroff, Boris L.             | Boris Petroff          | tt0052039 |
| 1746491754 | 1944 | 1944 | The Soul of a Monster                | The Soul of a Monster                | Jason, Will                   | Will Jason             | tt0037301 |
| 1746525193 | 1921 | 1921 | Scrap Iron                           | Scrap Iron                           | Ray, Charles                  | Charles Ray            | tt0012656 |
| 1746410872 | 1986 | 1985 | Screamplay                           | Screamplay                           | Seder, Rufus Butler           | Rufus Butler Seder     | tt0088067 |
| 1746542673 | 1924 | 1924 | The Back Trail                       | The Back Trail                       | Smith, Clifford               | George Marshall        | tt0014692 |
| 1745293675 | 2005 | 2005 | The Deal                             | The Deal                             | Kahn, Harvey                  | Harvey Kahn            | tt0405861 |
| 1746525059 | 1921 | 1921 | Keeping Up With Lizzie               | Keeping Up with Lizzie               | Ingraham, Lloyd               | Lloyd Ingraham         | tt0012345 |
| 1746584731 | 1930 | 1930 | The Parting of the Trails            | The Parting of the Trails            | McGowan, J. P.                | J.P. McGowan           | tt0021238 |
| 1746576707 | 1931 | 1931 | Sob Sister                           | Sob Sister                           | Santell, Alfred               | Alfred Santell         | tt0022407 |
| 1746585477 | 1939 | 1939 | Big Town Czar                        | Big Town Czar                        | Lubin, Arthur                 | Arthur Lubin           | tt0031098 |
| 1746453862 | 2000 | 2000 | Finding Forrester                    | Finding Forrester                    | Van Sant, Gus                 | Gus Van Sant           | tt0181536 |
| 1746563906 | 1952 | 1952 | Retreat, Hell!                       | Retreat, Hell!                       | Lewis, Joseph H.              | Joseph H. Lewis        | tt0045082 |
| 1745374560 | 2009 | 2009 | Everybody's Fine                     | Everybody's Fine                     | Jones, Kirk                   | Kirk Jones             | tt0780511 |
| 1746198007 | 1969 | 1969 | Charro!                              | Charro!                              | Warren, Charles Marquis       | Charles Marquis Warren | tt0064155 |
| 1746574283 | 1962 | 1962 | Zotz!                                | Zotz!                                | Castle, William               | William Castle         | tt0056725 |
| 1746455284 | 1998 | 1998 | Sphere                               | Sphere                               | Levinson, Barry               | Barry Levinson         | tt0120184 |
| 1746420385 | 1981 | 1981 | Fort Apache, The Bronx               | Fort Apache the Bronx                | Petrie, Daniel                | Daniel Petrie          | tt0082402 |
| 1746524928 | 1914 | 1914 | When Broadway Was a Trail            | When Broadway Was a Trail            | Lund, O. A. C.                | O.A.C. Lund            | tt0004794 |
| 1746235231 | 1972 | 1972 | The Life and Times of Judge Roy Bean | The Life and Times of Judge Roy Bean | Huston, John                  | John Huston            | tt0068853 |
| 1746508499 | 1950 | 1950 | Destination Moon                     | Destination Moon                     | Pichel, Irving                | Irving Pichel          | tt0042393 |

|            |      |      |                                                   |                                                 |                             |                    |           |
|------------|------|------|---------------------------------------------------|-------------------------------------------------|-----------------------------|--------------------|-----------|
| 1769970719 | 1912 | 1912 | East Lynne                                        | East Lynne                                      | Nichols, George O.          | Theodore Marston   | tt0338947 |
| 1746569909 | 1960 | 1960 | Natchez Trace                                     | Natchez Trace                                   | Crosland, Alan              | Alan Crosland Jr.  | tt0054112 |
| 1746198514 | 1967 | 1967 | Bonnie and Clyde                                  | Bonnie and Clyde                                | Penn, Arthur                | Arthur Penn        | tt0061418 |
| 1746198152 | 1968 | 1968 | Robby                                             | Robby                                           | Bluemke, Ralph C.           | Ralph C. Bluemke   | tt0063513 |
| 1746582746 | 1938 | 1938 | Test Pilot                                        | Test Pilot                                      | Fleming, Victor             | Victor Fleming     | tt0030848 |
| 1746497903 | 1920 | 1920 | The Desert Scorpion                               | The Desert Scorpion                             | Thayer, Otis B.             | Otis Thayer        | tt0191079 |
| 1746583873 | 1931 | 1931 | The Deceiver                                      | The Deceiver                                    | King, Louis                 | Louis King         | tt0021507 |
| 1746524929 | 1915 | 1915 | The Rug Maker's Daughter                          | The Rug Maker's Daughter                        | Apfel, Oscar                | Oscar Apfel        | tt0005984 |
| 1746475974 | 1948 | 1948 | Speed to Spare                                    | Speed to Spare                                  | Berke, William              | William Berke      | tt0040827 |
| 1746503555 | 1921 | 1922 | The Fast Freight                                  | The Fast Freight                                | Cruze, James                | James Cruze        | tt0012157 |
| 1746421190 | 1992 | 1991 | Rock Soup                                         | Rock Soup                                       | Kowalski, Lech              | Lech Kowalski      | tt0105269 |
| 1746420570 | 1940 | 1940 | The Durango Kid                                   | The Durango Kid                                 | Hillyer, Lambert            | Lambert Hillyer    | tt0032423 |
| 1746582548 | 1938 | 1938 | International Crime                               | International Crime                             | Lamont, Charles             | Charles Lamont     | tt0030273 |
| 1746465209 | 1945 | 1945 | I'll Remember April                               | I'll Remember April                             | Young, Harold               | Harold Young       | tt0037807 |
| 1746454385 | 1943 | 1943 | Northern Pursuit                                  | Northern Pursuit                                | Walsh, Raoul                | Raoul Walsh        | tt0036218 |
| 1746491740 | 1948 | 1948 | French Leave                                      | French Leave                                    | McDonald, Frank             | Frank McDonald     | tt0040372 |
| 1746502733 | 1914 | 1914 | The Thief                                         | The Thief                                       | Lewis, Edgar                | Edgar Lewis        | tt0004688 |
| 1746575057 | 1933 | 1934 | The Big Race                                      | The Big Race                                    | Newmeyer, Fred              | Fred C. Newmeyer   | tt0023810 |
| 1746585404 | 1939 | 1939 | Mutiny in the Big House                           | Mutiny in the Big House                         | Nigh, William               | William Nigh       | tt0031690 |
| 1746574753 | 1936 | 1936 | Dangerous Intrigue                                | Dangerous Intrigue                              | Selman, David               | David Selman       | tt0027497 |
| 1746580608 | 1938 | 1938 | My Old Kentucky Home                              | My Old Kentucky Home                            | Hillyer, Lambert            | Lambert Hillyer    | tt0030482 |
| 1746260907 | 1979 | 1979 | Bush Mama                                         | Bush Mama                                       | Gerima, Haile               | Haile Gerima       | tt0074259 |
| 1746508116 | 1949 | 1949 | Fighting Fools                                    | Fighting Fools                                  | Le Borg, Reginald           | Reginald Le Borg   | tt0041360 |
| 1745340055 | 2001 | 2001 | Ocean's Eleven                                    | Ocean's Eleven                                  | Soderbergh, Steven          | Steven Soderbergh  | tt0240772 |
| 1746409437 | 1989 | 1989 | Friday the 13th Part VIII -- Jason Takes Manhatta | Friday the 13th Part VIII: Jason Takes Manhatta | Hedden, Rob                 | Rob Hedden         | tt0097388 |
| 1746582402 | 1937 | 1937 | Breezing Home                                     | Breezing Home                                   | Carruth, Milton             | Milton Carruth     | tt0028660 |
| 1746436266 | 1991 | 1991 | He Said, She Said                                 | He Said, She Said                               | Kwapis, Ken; Silver, Marisa | Ken Kwapis         | tt0102011 |
| 1746454142 | 1997 | 1997 | Hijacking Hollywood                               | Hijacking Hollywood                             | Mandt, Neil                 | Neil Mandt         | tt0119292 |
| 1746565880 | 1953 | 1953 | Plunder of the Sun                                | Plunder of the Sun                              | Farrow, John                | John Farrow        | tt0046196 |
| 1746508484 | 1925 | 1925 | Spook Ranch                                       | Spook Ranch                                     | Laemmle, Edward             | Edward Laemmle     | tt0016387 |
| 1746576866 | 1931 | 1931 | Daddy Long Legs                                   | Daddy Long Legs                                 | Santell, Alfred             | Alfred Santell     | tt0021775 |
| 1746573466 | 1910 | 1910 | The Duke's Plan                                   | The Duke's Plan                                 | Griffith, D. W.             | D.W. Griffith      | tt0001187 |
| 1746508944 | 1924 | 1924 | Those Who Judge                                   | Those Who Judge                                 | King, Burton                | Burton L. King     | tt0015405 |
| 1746577002 | 1963 | 1963 | Ladybug Ladybug                                   | Ladybug Ladybug                                 | Perry, Frank                | Frank Perry        | tt0057242 |
| 1746394714 | 1983 | 1983 | Risky Business                                    | Risky Business                                  | Brickman, Paul              | Paul Brickman      | tt0086200 |
| 1769970746 | 1915 | 1915 | Perkin's Pep Producer                             | Perkin's Pep Producer                           | Smith, Sidney               | Sidney Smith       | tt0219245 |
| 1746496987 | 1919 | 1919 | A Girl at Bay                                     | A Girl at Bay                                   | Mills, Tom                  | Thomas R. Mills    | tt0008006 |
| 1746438965 | 1942 | 1942 | The Lady Is Willing                               | The Lady Is Willing                             |                             | Mitchell Leisen    | tt0034961 |
| 1745339934 | 2002 | 2002 | Big Trouble                                       | Big Trouble                                     | Sonnenfeld, Barry           | Barry Sonnenfeld   | tt0246464 |
| 1745341245 | 2008 | 2007 | Choose Connor                                     | Choose Connor                                   | Eberl, Luke                 | Lucas Elliot Eberl | tt0495026 |
| 1746574741 | 1937 | 1937 | Guns in the Dark                                  | Guns in the Dark                                | Newfield, Sam               | Sam Newfield       | tt0028969 |
| 1746524488 | 1912 | 1912 | His Secretary                                     | His Secretary                                   | Merwin, Bannister           | Bannister Merwin   | tt0002249 |
| 1746514898 | 1910 | 1910 | There, Little Girl, Don't Cry                     | There, Little Girl, Don't Cry                   |                             |                    | tt1389569 |
| 1745309496 | 2007 | 2007 | Mr. Brooks                                        | Mr. Brooks                                      | Evans, Bruce A.             | Bruce A. Evans     | tt0780571 |
| 1769970848 | 1915 | 1915 | Hartney Merwin's Adventure                        | Hartney Merwin's Adventure                      |                             | E.A. Martin        | tt0470331 |
| 1746508947 | 1924 | 1924 | Broken Laws                                       | The Broken Law                                  | Neill, R. William           | Paul Hurst         | tt0016687 |
| 1746578008 | 1938 | 1938 | Touchdown, Army                                   | Touchdown, Army                                 | Neumann, Kurt               | Kurt Neumann       | tt0030886 |
| 1746475285 | 1948 | 1948 | Check Your Guns                                   | Check Your Guns                                 | Taylor, Ray                 | Ray Taylor         | tt0039259 |
| 1746583639 | 1929 | 1929 | The Last Roundup                                  | The Last Round up                               | McGowan, J. P.              | J.P. McGowan       | tt0020079 |
| 1746585049 | 1929 | 1929 | Honky Tonk                                        | Honky Tonk                                      | Bacon, Lloyd                | Lloyd Bacon        | tt0019997 |
| 1746494011 | 1910 | 1910 | The Recreation of an Heiress                      | The Recreation of an Heiress                    | Powell, Frank               | Frank Powell       | tt0363017 |
| 1746569788 | 1956 | 1955 | The Square Jungle                                 | The Square Jungle                               | Hopper, Jerry               | Jerry Hopper       | tt0048654 |
| 1746524884 | 1916 | 1915 | The Come-Back                                     | The Comeback                                    | Balshofer, Fred J.          | Raoul Walsh        | tt0005125 |
| 1746533037 | 1915 | 1915 | How Molly Malone Made Good                        | How Molly Malone Made Good                      | McGill, Lawrence B.         | Lawrence B. McGill | tt0005522 |
| 1746512093 | 1917 | 1917 | The Duchess of Doubt                              | The Duchess of Doubt                            | Baker, George D.            | George D. Baker    | tt4830834 |
| 1746580660 | 1935 | 1935 | Stolen Harmony                                    | Stolen Harmony                                  | Werker, Alfred              | Alfred L. Werker   | tt0027043 |
| 1746501233 | 1915 | 1915 | The Italian                                       | The Italian                                     | Barker, Reginald            | Reginald Barker    | tt0005557 |

|            |      |      |                                        |                                        |                            |                        |           |
|------------|------|------|----------------------------------------|----------------------------------------|----------------------------|------------------------|-----------|
| 1746514332 | 1927 | 1927 | Papa's Boy                             | Papa's Boy                             | Taugrog, Norman            | Norman Taugrog         | tt0248288 |
| 1746491756 | 1945 | 1945 | Counter-Attack                         | Counter Attack                         | Korda, Zoltan              | Zoltan Korda           | tt0037618 |
| 1746409046 | 1984 | 1984 | Silent Night, Deadly Night             | Silent Night, Deadly Night             | Sellier, Jr., Charles E.   | Charles E. Sellier Jr. | tt0088117 |
| 1746465093 | 1946 | 1946 | West of the Alamo                      | West of the Alamo                      | Drake, Oliver              | Oliver Drake           | tt0039099 |
| 1746436203 | 1997 | 1996 | Sudden Manhattan                       | Sudden Manhattan                       | Shelly, Adrienne           | Adrienne Shelly        | tt0117775 |
| 1746419383 | 1993 | 1992 | Rich in Love                           | Rich in Love                           | Beresford, Bruce           | Bruce Beresford        | tt0105256 |
| 1746454396 | 1941 | 1941 | Week-End in Havana                     | Week End in Havana                     | Lang, Walter               | Walter Lang            | tt0034379 |
| 1746584373 | 1940 | 1941 | Mr. Washington Goes to Town            | Mr. Washington Goes to Town            | Buell, Jed                 | Jed Buell              | tt0033925 |
| 1746465242 | 1944 | 1944 | Gunsmoke Mesa                          | Gunsmoke Mesa                          | Fraser, Harry              | Harry L. Fraser        | tt0036889 |
| 1746394522 | 1985 | 1985 | Gymkata                                | Gymkata                                | Clouse, Robert             | Robert Clouse          | tt0089243 |
| 1746569687 | 1954 | 1954 | The Bob Mathias Story                  | The Bob Mathias Story                  | Lyon, Francis D.           | Francis D. Lyon        | tt0046795 |
| 1746486871 | 1920 | 1920 | The Great Redeemer                     | The Great Redeemer                     | Brown, Clarence            | Clarence Brown         | tt0011246 |
| 1746524754 | 1916 | 1916 | What Will People Say?                  | What Will People Say?                  | Blaché, Alice              | Alice Guy              | tt0007552 |
| 1746568003 | 1932 | 1931 | Stranger in Town                       | Stranger in Town                       | Kenton, Erle C.            | Erle C. Kenton         | tt0023526 |
| 1746567574 | 1952 | 1952 | Invasion U.S.A.                        | Invasion, U.S.A.                       | Green, Alfred E.           | Alfred E. Green        | tt0044750 |
| 1746581646 | 1928 | 1928 | Top Sergeant Mulligan                  | Top Sergeant Mulligan                  | Hogan, James P.            | James P. Hogan         | tt0019484 |
| 1746576133 | 1932 | 1932 | Mason of the Mounted                   | Mason of the Mounted                   | Fraser, Harry              | Harry L. Fraser        | tt0023195 |
| 1746570893 | 1935 | 1935 | Bad Boy                                | Bad Boy                                | Blystone, John             | John G. Blystone       | tt0026093 |
| 1746439420 | 2000 | 2000 | Gone in Sixty Seconds                  | Gone in Sixty Seconds                  | Sena, Dominic              | Dominic Sena           | tt0187078 |
| 1746582285 | 1930 | 1930 | Phantom of the Desert                  | Phantom of the Desert                  | Webb, Harry S.             | Harry S. Webb          | tt0021248 |
| 1746198291 | 1966 | 1966 | A Man Could Get Killed                 | A Man Could Get Killed                 | Neame, Ronald; Owen, Cliff | Ronald Neame           | tt0060662 |
| 1746419928 | 1991 | 1991 | The Doors                              | The Doors                              | Stone, Oliver              | Oliver Stone           | tt0101761 |
| 1745340033 | 2002 | 2001 | e-Dreams                               | Dream                                  | Chin, Wonsuk               | Leo Fialho             | tt0279792 |
| 1746569880 | 1958 | 1958 | The Flame Barrier                      | The Flame Barrier                      | Landres, Paul              | Paul Landres           | tt0051618 |
| 1769971969 | 1969 | 1969 | Infralsexum                            | Infralsexum                            |                            | Carlos Tobalina        | tt0170054 |
| 1746219364 | 1974 | 1974 | The Towering Inferno                   | The Towering Inferno                   | Guillermin, John           | John Guillermin        | tt0072308 |
| 1746483826 | 1917 | 1917 | Her Beloved Enemy                      | Her Beloved Enemy                      | Warde, Ernest              | Ernest C. Warde        | tt0175719 |
| 1746438936 | 1942 | 1942 | Kid Glove Killer                       | Kid Glove Killer                       | Zinnemann, Fred            | Fred Zinnemann         | tt0034941 |
| 1746408446 | 1986 | 1986 | Dangerously Close                      | Dangerously Close                      | Pyun, Albert               | Albert Pyun            | tt0090904 |
| 1746492055 | 1948 | 1948 | Disaster                               | Disaster                               | Pine, William H.           | William H. Pine        | tt0040293 |
| 1746235072 | 1975 | 1975 | Bug                                    | Bug                                    | Szwarc, Jeannot            | Jeannot Szwarc         | tt0072750 |
| 1745271957 | 2001 | 2001 | The Affair of the Necklace             | The Affair of the Necklace             | Shyer, Charles             | Charles Shyer          | tt0242252 |
| 1746580485 | 1937 | 1937 | Champagne Waltz                        | Champagne Waltz                        | Sutherland, A. Edward      | A. Edward Sutherland   | tt0028705 |
| 1746502693 | 1915 | 1915 | Tainted Money                          | Tainted Money                          | Davis, Ulysses             | Ulysses Davis          | tt0006133 |
| 1746542665 | 1950 | 1950 | Customs Agent                          | Customs Agent                          | Friedman, Seymour          | Seymour Friedman       | tt0042366 |
| 1769976710 | 1929 | 1929 | A Bird In The Hand                     | A Bird in the Hand                     | Graham, Walter             | Walter Graham          | tt0019694 |
| 1746410457 | 1985 | 1985 | Moving Violations                      | Moving Violations                      | Israel, Neal               | Neal Israel            | tt0089629 |
| 1746492734 | 1947 | 1947 | West to Glory                          | West to Glory                          | Taylor, Ray                | Ray Taylor             | tt0039979 |
| 1746565322 | 1932 | 1932 | The Seventh Commandment                | The Seventh Commandment                | Hogan, James P.            | Dwain Esper            | tt0121730 |
| 1746473890 | 1942 | 1942 | Iceland                                | Iceland                                | Humberstone, Bruce         | H. Bruce Humberstone   | tt0034886 |
| 1746520628 | 1926 | 1926 | Beyond All Odds                        | Beyond All Odds                        | Neitz, Alvin J.            | Alan James             | tt0015619 |
| 1746570817 | 1952 | 1952 | The Happy Time                         | The Happy Time                         | Fleischer, Richard         | Richard Fleischer      | tt0044687 |
| 1746410645 | 1994 | 1994 | Disclosure                             | Disclosure                             | Levinson, Barry            | Barry Levinson         | tt0109635 |
| 1746409350 | 1984 | 1984 | Exterminator 2                         | Exterminator 2                         | Buntzman, Mark             | Mark Buntzman          | tt0087229 |
| 1746515766 | 1917 | 1917 | Cleopatra                              | Cleopatra                              | Edwards, J. Gordon         | J. Gordon Edwards      | tt0007801 |
| 1769974304 | 1916 | 1916 | The Desert Calls Its Own               | The Desert Calls Its Own               | Mix, Tom                   | Tom Mix                | tt0006578 |
| 1745302266 | 2007 | 2007 | Kickin' It Old Skool                   | Kickin' It Old Skool                   | Glazer, Harv               | Harvey Glazer          | tt0772178 |
| 1746453461 | 1943 | 1942 | The Pay Off                            | The Pay Off                            | Dreifuss, Arthur           | Arthur Dreifuss        | tt0036255 |
| 1746581641 | 1929 | 1929 | Pals of the Prairie                    | Pals of the Prairie                    | King, Louis                | Louis King             | tt0020256 |
| 1746577039 | 1951 | 1951 | Native Son                             | Native Son                             | Chenal, Pierre             | Pierre Chenal          | tt0042781 |
| 1746500555 | 1950 | 1950 | The Cariboo Trail                      | The Cariboo Trail                      | Marin, Edwin L.            | Edwin L. Marin         | tt0042315 |
| 1746577210 | 1950 | 1950 | No Man of Her Own                      | No Man of Her Own                      | Leisen, Mitchell           | Mitchell Leisen        | tt0041694 |
| 1745282533 | 2007 | 2007 | War                                    | War                                    | Atwell, Philip G.          | Philip G. Atwell       | tt0499556 |
| 1746583296 | 1951 | 1951 | Comin' Round the Mountain              | Comin' Round the Mountain              | Lamont, Charles            | Charles Lamont         | tt0043425 |
| 1746455377 | 1996 | 1996 | Kids in the Hall Brain Candy           | Kids in the Hall: Brain Candy          | Makin, Kelly               | Kelly Makin            | tt0116768 |
| 1746492087 | 1948 | 1948 | Kidnapped                              | Kidnapped                              | Beaudine, William          | William Beaudine       | tt0040507 |
| 1746454946 | 1996 | 1996 | The Line King: The Al Hirschfeld Story | The Line King: The Al Hirschfeld Story | Dryfoos, Susan W.          | Susan Warms Dryfoos    | tt0116886 |

|            |      |      |                                  |                                  |                          |                      |           |
|------------|------|------|----------------------------------|----------------------------------|--------------------------|----------------------|-----------|
| 1746571078 | 1934 | 1934 | The Dragon Murder Case           | The Dragon Murder Case           | Humberstone, H. Bruce    | H. Bruce Humberstone | tt0025069 |
| 1746465069 | 1947 | 1946 | Gallant Bess                     | Gallant Bess                     | Marton, Andrew           | Andrew Marton        | tt0038547 |
| 1769976124 | 1926 | 1926 | Back Fire                        | Back Fire                        |                          | Scott Pembroke       | tt0415543 |
| 1746581658 | 1929 | 1929 | Untamed                          | Untamed                          | Conway, Jack             | Jack Conway          | tt0020538 |
| 1746582743 | 1935 | 1935 | The Ivory Handled Gun            | The Ivory Handled Gun            | Taylor, Ray              | Ray Taylor           | tt0026541 |
| 1746585450 | 1940 | 1940 | Rancho Grande                    | Rancho Grande                    | McDonald, Frank          | Frank McDonald       | tt0032970 |
| 1746520799 | 1949 | 1949 | Trail of the Yukon               | Trail of the Yukon               | Crowley, William X.      | William Beaudine     | tt0041981 |
| 1746576721 | 1932 | 1932 | The Conquerors                   | The Conquerors                   | Wellman, William A.      | William A. Wellman   | tt0022778 |
| 1746582101 | 1930 | 1929 | Hit the Deck                     | Hit the Deck                     | Reed, Luther             | Luther Reed          | tt0020977 |
| 1746423323 | 1992 | 1992 | Deep Cover                       | Deep Cover                       | Duke, Bill               | Bill Duke            | tt0104073 |
| 1746234621 | 1968 | 1968 | The Queen                        | The Queen                        | Simon, Frank             | Frank Simon          | tt0063477 |
| 1746569795 | 1954 | 1954 | Twist of Fate                    | Twist of Fate                    | Miller, David            | David Miller         | tt0047625 |
| 1746545254 | 1940 | 1940 | Yesterday's Heroes               | Yesterday's Heroes               | Leeds, Herbert I.        | Herbert I. Leeds     | tt0033278 |
| 1746512146 | 1917 | 1917 | Chris and His Wonderful Lamp     | Chris and His Wonderful Lamp     | Crosland, Alan           | Alan Crosland        | tt0168582 |
| 1746410205 | 1987 | 1987 | The Witches of Eastwick          | The Witches of Eastwick          | Miller, George           | George Miller        | tt0094332 |
| 1769969347 | 1930 | 1930 | Two Plus Fours                   | Two Plus Fours                   | McCarey, Raymond         | Ray McCarey          | tt0021496 |
| 1746409062 | 1992 | 1992 | White Men Can't Jump             | White Men Can't Jump             | Shelton, Ron             | Ron Shelton          | tt0105812 |
| 1746570428 | 1952 | 1952 | Colorado Sundown                 | Colorado Sundown                 | Witney, William          | William Witney       | tt0044506 |
| 1746583042 | 1938 | 1938 | Illegal Traffic                  | Illegal Traffic                  | King, Louis              | Louis King           | tt0030266 |
| 1746520304 | 1925 | 1925 | A Streak of Luck                 | A Streak of Luck                 | Thorpe, Richard          | Richard Thorpe       | tt0166827 |
| 1746560961 | 1932 | 1932 | The Drifter                      | The Drifter                      | O'Connor, Wm.            | William A. O'Connor  | tt0022840 |
| 1746578017 | 1935 | 1935 | Streamline Express               | Streamline Express               | Fields, Leonard          | Leonard Fields       | tt0027053 |
| 1745357710 | 2002 | 2002 | Blue Crush                       | Blue Crush                       | Stockwell, John          | John Stockwell       | tt0300532 |
| 1746524024 | 1922 | 1922 | Caught Bluffing                  | Caught Bluffing                  | Hillyer, Lambert         | Lambert Hillyer      | tt0013003 |
| 1746574372 | 1951 | 1951 | The Enforcer                     | The Enforcer                     | Windust, Bretaigne       | Bretaigne Windust    | tt0043503 |
| 1746583202 | 1931 | 1931 | Sea Devils                       | Sea Devils                       | Levering, Joseph         | Joseph Levering      | tt0022351 |
| 1746584994 | 1939 | 1939 | 6,000 Enemies                    | 6,000 Enemies                    | Seitz, George B.         | George B. Seitz      | tt0031014 |
| 1746585445 | 1940 | 1940 | The Villain Still Pursued Her    | The Villain Still Pursued Her    | Cline, Edward            | Edward F. Cline      | tt0033224 |
| 1746235502 | 1976 | 1976 | Taxi Driver                      | Taxi Driver                      | Scorsese, Martin         | Martin Scorsese      | tt0075314 |
| 1746455725 | 1998 | 1998 | A Soldier's Daughter Never Cries | A Soldier's Daughter Never Cries | Ivory, James             | James Ivory          | tt0120835 |
| 1746234823 | 1972 | 1972 | The Doberman Gang                | The Doberman Gang                | Chudnow, Byron Ross      | Byron Chudnow        | tt0068491 |
| 1746580857 | 1935 | 1935 | Fighting Shadows                 | Fighting Shadows                 | Selman, David            | David Selman         | tt0026355 |
| 1746571116 | 1934 | 1934 | Father Brown, Detective          | Father Brown, Detective          | Sedgwick, Edward         | Edward Sedgwick      | tt0026341 |
| 1746509260 | 1927 | 1927 | The Slingshot Kid                | The Slingshot Kid                | King, Louis              | Louis King           | tt0165476 |
| 1746184607 | 1965 | 1965 | The Agony and the Ecstasy        | The Agony and the Ecstasy        | Reed, Carol              | Carol Reed           | tt0058886 |
| 1746410840 | 1989 | 1988 | Criminal Law                     | Criminal Law                     | Campbell, Martin         | Martin Campbell      | tt0097125 |
| 1746578659 | 1963 | 1963 | The Shotgun Wedding              | Shotgun Wedding                  | Petroff, Boris L.        | Boris Petroff        | tt0057496 |
| 1746437604 | 1995 | 1995 | Tank Girl                        | Tank Girl                        | Talalay, Rachel          | Rachel Talalay       | tt0114614 |
| 1746524824 | 1915 | 1915 | The Dawn of a Tomorrow           | The Dawn of a Tomorrow           | Kirkwood, James          | James Kirkwood       | tt0005180 |
| 1746555391 | 1955 | 1955 | Robbers' Roost                   | Robbers' Roost                   | Salkow, Sidney           | Sidney Salkow        | tt0048558 |
| 1746574457 | 1933 | 1933 | The Barber Shop                  | The Barber Shop                  | Ripley, Arthur           | Arthur Ripley        | tt0023779 |
| 1746562424 | 1954 | 1954 | Black Horse Canyon               | Black Horse Canyon               | Hibbs, Jesse             | Jesse Hibbs          | tt0046785 |
| 1746437020 | 1943 | 1943 | The Lone Star Trail              | The Lone Star Trail              | Taylor, Ray              | Ray Taylor           | tt0036118 |
| 1745341776 | 2002 | 2002 | Scooby-Doo                       | Scooby Doo                       | Gosnell, Raja            | Raja Gosnell         | tt0267913 |
| 1746560282 | 1963 | 1963 | The Prize                        | The Prize                        | Robson, Mark             | Mark Robson          | tt0057426 |
| 1746501585 | 1915 | 1915 | The Crimson Wing                 | The Crimson Wing                 | Calvert, E. H.           | E.H. Calvert         | tt0005158 |
| 1746576712 | 1932 | 1932 | Me and My Gal                    | Me and My Gal                    | Walsh, Raoul             | Raoul Walsh          | tt0023202 |
| 1746560646 | 1932 | 1932 | Cock of the Air                  | Cock of the Air                  | Buckingham, Tom          | Tom Buckingham       | tt0022769 |
| 1746435215 | 1942 | 1942 | Desperate Journey                | Desperate Journey                | Walsh, Raoul             | Raoul Walsh          | tt0034646 |
| 1746576929 | 1951 | 1951 | Roadblock                        | Roadblock                        | Daniels, Harold          | Harold Daniels       | tt0043973 |
| 1769969417 | 1911 | 1911 | The Eastern Cowboy               | The Eastern Cowboy               |                          | Allan Dwan           | tt0444785 |
| 1745359942 | 2001 | 2001 | Session 9                        | Session 9                        |                          | Brad Anderson        | tt0261983 |
| 1746562123 | 1956 | 1956 | The Last Hunt                    | The Last Hunt                    | Anderson, Brad           | Brad Anderson        | tt0049432 |
| 1746211455 | 1971 | 1971 | Werewolves on Wheels             | Werewolves on Wheels             | Brooks, Richard          | Richard Brooks       | tt0067972 |
| 1746554794 | 1957 | 1957 | Monkey on My Back                | Monkey on My Back                | Levesque, Michel         | Michel Levesque      | tt0050719 |
| 1746534812 | 1920 | 1920 | Eyes of the Heart                | Eyes of the Heart                | DeToth, Andre; Post, Ted | André De Toth        | tt0011166 |
| 1746453613 | 1940 | 1940 | Honeymoon Deferred               | Honeymoon Deferred               | Powell, Paul             | Paul Powell          | tt0032607 |
|            |      |      |                                  |                                  | Landers, Lew             | Lew Landers          | tt0032607 |

|            |      |      |                               |                               |                                |                    |           |
|------------|------|------|-------------------------------|-------------------------------|--------------------------------|--------------------|-----------|
| 1746500297 | 1925 | 1925 | Below the Line                | Below the Line                | Raymaker, Herman               | Herman C. Raymaker | tt0015616 |
| 1746580578 | 1936 | 1936 | Tundra                        | Tundra                        | Dawn, Norman                   | Norman Dawn        | tt0028422 |
| 1746581838 | 1928 | 1928 | Outcast Souls                 | Outcast Souls                 | Chaudet, Louis                 | Louis Chaudet      | tt0019240 |
| 1746184521 | 1910 | 1910 | Aunt Maria's Substitute       | Aunt Maria's Substitute       |                                |                    | tt1914206 |
| 1745272497 | 2000 | 2000 | South of Heaven, West of Hell | South of Heaven, West of Hell | Yoakam, Dwight                 | Dwight Yoakam      | tt0179473 |
| 1746567255 | 1933 | 1933 | Samarang                      | Samarang                      | Wing, Ward                     | Ward Wing          | tt0034177 |
| 1746583912 | 1930 | 1930 | Sweet Kitty Bellairs          | Sweet Kitty Bellairs          | Green, Alfred E.               | Alfred E. Green    | tt0021439 |
| 1746576854 | 1932 | 1932 | Little Orphan Annie           | Little Orphan Annie           | Robertson, John                | John S. Robertson  | tt0023142 |
| 1746580409 | 1938 | 1938 | Tom Sawyer, Detective         | Tom Sawyer, Detective         | King, Louis                    | Louis King         | tt0030878 |
| 1746523985 | 1915 | 1915 | John Glayde's Honor           | John Glayde's Honor           | Irving, George                 | George Irving      | tt0005572 |
| 1746433954 | 1998 | 1998 | Star Trek: Insurrection       | Star Trek: Insurrection       | Frakes, Jonathan               | Jonathan Frakes    | tt0120844 |
| 1746514229 | 1916 | 1916 | John Needham's Double         | John Needham's Double         | Weber, Lois; Smalley, Phillips | Phillips Smalley   | tt0006883 |
| 1746584016 | 1938 | 1938 | Change of Heart               | Change of Heart               | Tinling, James                 | James Tinling      | tt0029983 |
| 1746217174 | 1967 | 1967 | Valley of the Dolls           | Valley of the Dolls           | Robson, Mark                   | Mark Robson        | tt0062430 |
| 1746419458 | 1940 | 1940 | Shooting High                 | Shooting High                 | Green, Alfred E.               | Alfred E. Green    | tt0033044 |
| 1746565185 | 1953 | 1953 | Striporama                    | Striporama                    | Intrator, Jerald               | Jerald Intrator    | tt0047535 |
| 1746420331 | 1940 | 1940 | Knights of the Range          | Knights of the Range          | Selander, Lesley               | Lesley Selander    | tt0032674 |
| 1746454491 | 1945 | 1945 | Strange Holiday               | Strange Holiday               | Oboler, Arch                   | Arch Oboler        | tt0038125 |
| 1746581832 | 1929 | 1929 | The Trespasser                | The Trespasser                | Goulding, Edmund               | Edmund Goulding    | tt0020514 |
| 1746500484 | 1924 | 1924 | The Gaiety Girl               | The Gaiety Girl               | Baggot, King                   | King Baggot        | tt0014930 |
| 1745309127 | 2006 | 2006 | Lady in the Water             | Lady in the Water             | Shyamalan, M. Night            | M. Night Shyamalan | tt0452637 |
| 1746436847 | 1999 | 1999 | Dogma                         | Dogma                         | Smith, Kevin                   | Kevin Smith        | tt0120655 |
| 1746199922 | 1970 | 1970 | Tobacco Roody                 | Tobacco Roody                 | Buckalew                       | Bethel Buckalew    | tt0128769 |
| 1746581226 | 1959 | 1959 | The Giant Behemoth            | The Giant Behemoth            | Lourie, Eugene                 | Douglas Hickox     | tt0052611 |
| 1746577136 | 1950 | 1950 | Pretty Baby                   | Pretty Baby                   | Windust, Bretagne              | Bretagne Windust   | tt0042858 |
| 1746534807 | 1920 | 1920 | Love's Protégé                | Love's Protégé                | Wright, Walter                 | Walter Wright      | tt0196721 |
| 1746486159 | 1918 | 1918 | The Eleventh Commandment      | The Eleventh Commandment      | Ince, Ralph W.                 | Ralph Ince         | tt0009034 |
| 1746249816 | 1976 | 1976 | Scorchy                       | Scorchy                       | Avedis, Hikmet                 | Howard Avedis      | tt0075174 |
| 1746202641 | 1970 | 1969 | Land Raiders                  | Land Raiders                  | Juran, Nathan                  | Nathan Juran       | tt0065962 |
| 1745372675 | 2008 | 2008 | Marley & Me                   | Marley & Me                   | Frankel, David                 | David Frankel      | tt0822832 |
| 1746507907 | 1950 | 1950 | The Gunfighter                | The Gunfighter                | King, Henry                    | Henry King         | tt0042531 |
| 1746561585 | 1956 | 1956 | While the City Sleeps         | While the City Sleeps         | Lang, Fritz                    | Fritz Lang         | tt0049949 |
| 1746524792 | 1916 | 1916 | Romeo and Juliet              | Romeo and Juliet              | Noble, John W.                 | Francis X. Bushman | tt0007272 |
| 1746423012 | 1998 | 1997 | Plump Fiction                 | Plump Fiction                 | Koherr, Bob                    | Bob Koherr         | tt0117350 |
| 1746435590 | 1942 | 1942 | Rolling Down the Great Divide | Rolling Down the Great Divide | Stewart, Peter                 | Sam Newfield       | tt0035265 |
| 1746507916 | 1924 | 1924 | Galloping Fish                | The Galloping Fish            | Andrews, Del                   | Del Andrews        | tt0014934 |
| 1746409952 | 1982 | 1982 | The Beastmaster               | The Beastmaster               | Coscarelli, Don                | Don Coscarelli     | tt0083630 |
| 1746583930 | 1929 | 1929 | Lucky Star                    | Lucky Star                    | Borzage, Frank                 | Frank Borzage      | tt0020122 |
| 1746580299 | 1938 | 1938 | Rebellious Daughters          | Rebellious Daughters          | Yarborough, Jean               | Jean Yarborough    | tt0030659 |
| 1746532632 | 1914 | 1914 | The Daughters of Men          | The Daughters of Men          | Terwilliger, George            | George Terwilliger | tt0003825 |
| 1746483465 | 1918 | 1918 | Secret Code                   | The Secret Code               | Parker, Albert                 | Albert Parker      | tt0009593 |
| 1746420791 | 1994 | 1994 | Ed Wood                       | Ed Wood                       | Burton, Tim                    | Tim Burton         | tt0109707 |
| 1746437933 | 1943 | 1942 | Time to Kill                  | Time to Kill                  | Leeds, Herbert I.              | Herbert I. Leeds   | tt0035443 |
| 1746393966 | 1989 | 1989 | Troop Beverly Hills           | Troop Beverly Hills           | Kanew, Jeff                    | Jeff Kanew         | tt0098519 |
| 1746454397 | 1941 | 1941 | You're the One                | You're the One                | Murphy, Ralph                  | Ralph Murphy       | tt0034412 |
| 1746580619 | 1936 | 1936 | Lightnin' Bill Carson         | Lightnin' Bill Carson         | Newfield, Sam                  | Sam Newfield       | tt0027886 |
| 1746218779 | 1971 | 1971 | The Projectionist             | The Projectionist             | Hurwitz, Harry                 | Harry Hurwitz      | tt0067622 |
| 1746248084 | 1966 | 1966 | Walk, Don't Run               | Walk Don't Run                | Walters, Charles               | Charles Walters    | tt0061170 |
| 1745372553 | 2004 | 2004 | Spanglish                     | Spanglish                     | Brooks, James L.               | James L. Brooks    | tt0371246 |
| 1746200465 | 1968 | 1968 | The Devil's Brigade           | The Devil's Brigade           | McLaglen, Andrew V.            | Andrew V. McLaglen | tt0062886 |
| 1745340321 | 2003 | 2003 | Runaway Jury                  | Runaway Jury                  | Fleder, Gary                   | Gary Fleder        | tt0313542 |
| 1746520036 | 1924 | 1924 | Daring Love                   | Daring Love                   | Edwards, Roland G.             | Rowland G. Edwards | tt0014828 |
| 1746501498 | 1910 | 1910 | The Road to Richmond          | The Road to Richmond          |                                |                    | tt1389547 |
| 1746454504 | 1946 | 1946 | Lover Come Back               | Lover Come Back               | Seiter, William A.             | William A. Seiter  | tt0038705 |
| 1746423318 | 1989 | 1989 | The Karate Kid Part III       | The Karate Kid Part III       | Avildsen, John G.              | John G. Avildsen   | tt0097647 |
| 1746570226 | 1934 | 1934 | She Made Her Bed              | She Made Her Bed              | Murphy, Ralph                  | Ralph Murphy       | tt0025775 |
| 1746569787 | 1953 | 1952 | The Member of the Wedding     | The Member of the Wedding     | Zinnemann, Fred                | Fred Zinnemann     | tt0044896 |



|            |      |      |                                |                                |                                   |                      |           |
|------------|------|------|--------------------------------|--------------------------------|-----------------------------------|----------------------|-----------|
| 1746523561 | 1915 | 1915 | The Mating                     | The Mating                     | West, Raymond B.                  | Raymond B. West      | tt0005728 |
| 1746530681 | 1949 | 1949 | Law of the West                | Law of the West                | Taylor, Ray                       | Ray Taylor           | tt0041584 |
| 1746581146 | 1959 | 1959 | The FBI Story                  | The FBI Story                  | LeRoy, Mervyn                     | Mervyn LeRoy         | tt0052792 |
| 1746219335 | 1971 | 1971 | The Hospital                   | The Hospital                   | Hiller, Arthur                    | Arthur Hiller        | tt0067217 |
| 1746453543 | 1942 | 1942 | Mexican Spitfire at Sea        | Mexican Spitfire at Sea        | Goodwins, Leslie                  | Leslie Goodwins      | tt0035060 |
| 1746561090 | 1932 | 1932 | South Sea Adventures           | South Sea Adventures           |                                   | Zane Grey            | tt0216228 |
| 1746435266 | 1941 | 1940 | Stolen Paradise                | Stolen Paradise                | Gasnier, Louis                    | Louis J. Gasnier     | tt0221585 |
| 1746583523 | 1951 | 1951 | The Prince Who Was a Thief     | The Prince Who Was a Thief     | Maté, Rudolph                     | Rudolph Maté         | tt0043935 |
| 1746580605 | 1938 | 1938 | Peck's Bad Boy with the Circus | Peck's Bad Boy with the Circus | Cline, Edward F.                  | Edward F. Cline      | tt0030565 |
| 1746571358 | 1935 | 1935 | West Point of the Air          | West Point of the Air          | Rosson, Richard                   | Richard Rosson       | tt0027196 |
| 1746580811 | 1939 | 1939 | Bad Lands                      | Bad Lands                      | Landers, Lew                      | Lew Landers          | tt0031071 |
| 1746582716 | 1936 | 1936 | The Mine with the Iron Door    | The Mine with the Iron Door    | Howard, David                     | David Howard         | tt0027973 |
| 1746520186 | 1924 | 1924 | Notch Number One               | Notch Number One               |                                   | Ben F. Wilson        | tt0338293 |
| 1746508740 | 1924 | 1924 | Do It Now                      | Do It Now                      | Worne, Duke                       | Duke Worne           | tt0014850 |
| 1746566012 | 1957 | 1957 | Four Girls in Town             | Four Girls in Town             | Sher, Jack                        | Jack Sher            | tt0049228 |
| 1746514634 | 1927 | 1927 | The Golden Stallion            | The Golden Stallion            | Webb, Harry                       | Harry S. Webb        | tt0017943 |
| 1746580428 | 1937 | 1937 | Fit for a King                 | Fit for a King                 | Sedgwick, Edward                  | Edward Sedgwick      | tt0028876 |
| 1746562103 | 1956 | 1956 | The Sharkfighters              | The Sharkfighters              | Hopper, Jerry                     | Jerry Hopper         | tt0049751 |
| 1745373939 | 2002 | 2002 | Stone Reader                   | Stone Reader                   | Moskowitz, Mark                   | Mark Moskowitz       | tt0324080 |
| 1746512133 | 1916 | 1916 | The Haunted Station            | The Haunted Station            | Davis, James                      | J. Gunnis Davis      | tt1534526 |
| 1746524002 | 1916 | 1916 | Kinkaid, Gambler               | Kinkaid, Gambler               | Wells, Raymond                    | Raymond Wells        | tt0006898 |
| 1746184129 | 1910 | 1910 | After the Ball                 | After the Ball                 | Powell, Frank                     | Frank Powell         | tt0001472 |
| 1746485615 | 1918 | 1918 | The Birth of a Race            | The Birth of a Race            | Noble, John W.                    | John W. Noble        | tt0133418 |
| 1746580634 | 1937 | 1937 | Night of Mystery               | Night of Mystery               | Dupont, E. A.                     | Ewald André Dupont   | tt0029312 |
| 1746582969 | 1937 | 1937 | Charlie Chan at the Olympics   | Charlie Chan at the Olympics   | Humberstone, H. Bruce             | H. Bruce Humberstone | tt0028708 |
| 1746491730 | 1947 | 1947 | Merton of the Movies           | Merton of the Movies           | Alton, Robert                     | Robert Alton         | tt0039619 |
| 1746474495 | 1944 | 1944 | Outlaws of Santa Fe            | Outlaws of Santa Fe            | Bretherton, Howard                | Howard Bretherton    | tt0037162 |
| 1769970563 | 1967 | 1967 | Teach Me How To Do It!         | Teach Me How To Do It!         | Meola, Michael                    | Michael Meola        | tt0259043 |
| 1746465110 | 1947 | 1947 | The Millerson Case             | The Millerson Case             | Archainbaud, George               | George Archainbaud   | tt0039625 |
| 1746208504 | 1967 | 1967 | Monkeys, Go Home!              | Monkeys, Go Home!              | McLaglen, Andrew V.               | Andrew V. McLaglen   | tt0061989 |
| 1746560917 | 1932 | 1932 | Fireman Save My Child          | Fireman, Save My Child         | Bacon, Lloyd                      | Lloyd Bacon          | tt0022890 |
| 1746409496 | 1988 | 1987 | Twisted Nightmare              | Twisted Nightmare              | Hunt, Paul                        | Paul Hunt            | tt0134167 |
| 1746199022 | 1969 | 1969 | Guns of the Magnificent Seven  | Guns of the Magnificent Seven  | Wendkos, Paul                     | Paul Wendkos         | tt0064395 |
| 1746216671 | 1968 | 1967 | Custer of the West             | Custer of the West             | Siodmak, Robert                   | Robert Siodmak       | tt0062844 |
| 1746465116 | 1942 | 1942 | The Vanishing Virginian        | The Vanishing Virginian        | Borzage, Frank                    | Frank Borzage        | tt0035504 |
| 1746393324 | 1988 | 1988 | Dakota                         | Dakota                         | Holmes, Fred                      | Fred Holmes          | tt0094940 |
| 1746423460 | 1990 | 1990 | Mountains of the Moon          | Mountains of the Moon          | Rafelson, Bob                     | Bob Rafelson         | tt0100196 |
| 1746508682 | 1924 | 1924 | Stay Single                    | Stay Single                    | Sidney, Scott                     | Scott Sidney         | tt0830661 |
| 1746249984 | 1975 | 1975 | The Man in the Glass Booth     | The Man in the Glass Booth     | Hiller, Arthur                    | Arthur Hiller        | tt0073345 |
| 1746520097 | 1927 | 1927 | The Missing Link               | The Missing Link               | Reisner, Charles F.               | Charles Reisner      | tt0018164 |
| 1746393319 | 1985 | 1985 | Wizards of the Lost Kingdom    | Wizards of the Lost Kingdom    | Olivera, Hector                   | Héctor Olivera       | tt0090333 |
| 1746578860 | 1951 | 1951 | Goodbye, My Fancy              | Goodbye, My Fancy              | Sherman, Vincent; Mattison, Frank | Vincent Sherman      | tt0043595 |
| 1746582362 | 1951 | 1951 | The Longhorn                   | The Longhorn                   | Collins, Lewis                    | Lewis D. Collins     | tt0043753 |
| 1746454655 | 1946 | 1946 | The Devil's Playground         | The Devil's Playground         | Archainbaud, George               | George Archainbaud   | tt0038472 |
| 1746504624 | 1922 | 1922 | Blind Circumstances            | Blind Circumstances            | Morante, Milburn                  | Milburn Morante      | tt0012950 |
| 1746437931 | 1941 | 1941 | City of Missing Girls          | City of Missing Girls          | Clifton, Elmer                    | Elmer Clifton        | tt0033469 |
| 1746475286 | 1948 | 1948 | Homicide for Three             | Homicide for Three             | Blair, George                     | George Blair         | tt0040447 |
| 1746568148 | 1933 | 1933 | Central Airport                | Central Airport                | Wellman, William A.               | William A. Wellman   | tt0023878 |
| 1746435688 | 1940 | 1940 | Escape to Glory                | Escape to Glory                | Brahm, John                       | John Brahm           | tt0032448 |
| 1745293528 | 2007 | 2007 | No Reservations                | No Reservations                | Hicks, Scott                      | Scott Hicks          | tt0481141 |
| 1746545372 | 1940 | 1940 | Billy the Kid's Gun Justice    | Billy the Kid's Gun Justice    | Stewart, Peter                    | Sam Newfield         | tt0135805 |
| 1746424049 | 1940 | 1940 | I'm Still Alive                | I'm Still Alive                | Reis, Irving                      | Irving Reis          | tt0032622 |
| 1746467506 | 1917 | 1917 | The Flame of Youth             | The Flame of Youth             | Clifton, Elmer                    | Elmer Clifton        | tt0007952 |
| 1746583725 | 1928 | 1928 | The Ballyhoo Buster            | The Ballyhoo Buster            | Thorpe, Richard                   | Richard Thorpe       | tt0018672 |
| 1746508443 | 1925 | 1925 | The Shock Punch                | The Shock Punch                | Sloane, Paul                      | Paul Sloane          | tt0016345 |
| 1746486784 | 1919 | 1919 | Eyes of Youth                  | Eyes of Youth                  | Parker, Albert                    | Albert Parker        | tt0010103 |
| 1746420220 | 1993 | 1993 | Cop & 1/2                      | Cop & ½                        | Winkler, Henry                    | Henry Winkler        | tt0106613 |

|                   |             |             |                               |                               |                                   |                          |                  |
|-------------------|-------------|-------------|-------------------------------|-------------------------------|-----------------------------------|--------------------------|------------------|
| 1746567813        | 1952        | 1952        | The Ring                      | The Ring                      | Neumann, Kurt                     | Kurt Neumann             | tt0045091        |
| 1746524149        | 1917        | 1917        | The Clean-Up                  | The Clean Up                  | Worthington, William              | William Worthington      | tt0007800        |
| 1746582791        | 1934        | 1934        | One Is Guilty                 | One Is Guilty                 | Hillyer, Lambert                  | Lambert Hillyer          | tt0025599        |
| 1746570871        | 1933        | 1933        | Ann Vickers                   | Ann Vickers                   | Cromwell, John                    | John Cromwell            | tt0023759        |
| 1746515017        | 1923        | 1923        | Fog Bound                     | Fog Bound                     | Willat, Irvin                     | Irvin Willat             | tt0014050        |
| 1746559986        | 1964        | 1964        | Goodbye Charlie               | Goodbye Charlie               | Minnelli, Vincente                | Vincente Minnelli        | tt0058154        |
| 1746507570        | 1926        | 1926        | Paris at Midnight             | Paris at Midnight             | Hopper, E. Mason                  | E. Mason Hopper          | tt0017252        |
| 1746576904        | 1931        | 1931        | Not Exactly Gentlemen         | Not Exactly Gentlemen         | Stoloff, Benjamin                 | Benjamin Stoloff         | tt0022480        |
| 1746495802        | 1920        | 1920        | The Forbidden Thing           | The Forbidden Thing           | Dwan, Allan                       | Allan Dwan               | tt0011198        |
| 1746408511        | 1984        | 1984        | Under the Volcano             | Under the Volcano             | Huston, John                      | John Huston              | tt0088322        |
| 1769970789        | 1913        | 1913        | How to Live 100 Years         | How to Live 100 Years         | Miles, David                      | David Miles              | tt0233896        |
| 1746185684        | 1965        | 1965        | Faster, Pussycat! Kill! Kill! | Faster, Pussycat! Kill! Kill! | Meyer, Russ                       | Russ Meyer               | tt0059170        |
| 1746515372        | 1918        | 1918        | Whatever the Cost             | Whatever the Cost             | Ensminger, Robert                 | Robert Ensminger         | tt0190133        |
| 1746554787        | 1964        | 1964        | Magic Christmas Tree          | Magic Christmas Tree          | Parish, Richard C.                | Richard C. Parish        | tt0195039        |
| 1746453487        | 1945        | 1945        | Back to Bataan                | Back to Bataan                | Dmytryk, Edward                   | Edward Dmytryk           | tt0037522        |
| 1746583852        | 1929        | 1928        | Lucky Boy                     | Lucky Boy                     | Taugo, Norman; Wilson, Charles C. | Norman Taugo             | tt0020121        |
| 1746555955        | 1955        | 1955        | Underwater!                   | Underwater!                   | Sturges, John                     | John Sturges             | tt0048764        |
| 1746555855        | 1956        | 1956        | Disneyland, U.S.A.            | Disneyland, U.S.A.            | Luske, Hamilton S.                | Hamilton Luske           | tt0472588        |
| 1746520508        | 1949        | 1949        | On the Town                   | On the Town                   | Kelly, Gene; Donen, Stanley       | Stanley Donen            | tt0041716        |
| 1746580869        | 1936        | 1936        | General Spanky                | General Spanky                | Newmeyer, Fred; Douglas, Gordon   | Gordon Douglas           | tt0027665        |
| 1746501377        | 1915        | 1915        | The Explorer                  | The Explorer                  | Melford, George                   | George Melford           | tt0126898        |
| 1746525084        | 1920        | 1920        | A Lady in Love                | A Lady in Love                | Edwards, Walter                   | Walter Edwards           | tt0011381        |
| 1746435134        | 1940        | 1940        | Charlie Chan in Panama        | Charlie Chan in Panama        | Foster, Norman                    | Norman Foster            | tt0032325        |
| 1746560759        | 1932        | 1932        | What Price Hollywood?         | What Price Hollywood?         | Cukor, George                     | George Cukor             | tt0023686        |
| 1746574540        | 1952        | 1952        | Somebody Loves Me             | Somebody Loves Me             | Brecher, Irving                   | Irving Brecher           | tt0045171        |
| 1746420366        | 1993        | 1993        | Poetic Justice                | Poetic Justice                | Singleton, John                   | John Singleton           | tt0107840        |
| 1746573958        | 1963        | 1963        | Critic's Choice               | Critic's Choice               | Weis, Don                         | Don Weis                 | tt0056964        |
| 1746524908        | 1915        | 1915        | The Closing Net               | The Closing Net               | José, Edward                      | Edward José              | tt0005102        |
| 1746580793        | 1935        | 1935        | Unknown Woman                 | Unknown Woman                 | Rogell, Albert                    | Albert S. Rogell         | tt0027161        |
| 1746520662        | 1925        | 1925        | Border Vengeance              | Border Vengeance              | Webb, Harry                       | Harry S. Webb            | tt0015639        |
| 1746567794        | 1952        | 1952        | Lure of the Wilderness        | Lure of the Wilderness        | Negulesco, Jean                   | Jean Negulesco           | tt0044859        |
| 1746420995        | 1982        | 1982        | Still of the Night            | Still of the Night            | Benton, Robert                    | Robert Benton            | tt0084732        |
| 1746508263        | 1924        | 1924        | The Bowery Bishop             | The Bowery Bishop             | Campbell, Colin                   | Colin Campbell           | tt0014732        |
| 1746437985        | 1942        | 1942        | The Black Swan                | The Black Swan                | King, Henry                       | Henry King               | tt0034522        |
| 1746453614        | 1943        | 1943        | Colt Comrades                 | Colt Comrades                 | Selander, Lesley                  | Lesley Selander          | tt0035744        |
| 1746410851        | 1994        | 1994        | 8 Seconds                     | 8 Seconds                     | Avildsen, John G.                 | John G. Avildsen         | tt0109021        |
| 1745372323        | 2003        | 2003        | Willard                       | Willard                       | Morgan, Glen                      | Glen Morgan              | tt0310357        |
| 1746487290        | 1918        | 1918        | Her American Husband          | Her American Husband          | Hopper, E. Mason                  | E. Mason Hopper          | tt0148271        |
| <b>1746581925</b> | <b>1930</b> | <b>1930</b> | <b>Montana Moon</b>           | <b>Montana Moon</b>           | <b>St. Clair, Malcolm</b>         | <b>Malcolm St. Clair</b> | <b>tt0021152</b> |
| 1746520966        | 1948        | 1948        | The Winner's Circle           | The Winner's Circle           | Feist, Felix E.                   | Felix E. Feist           | tt0040969        |
| 1746585192        | 1929        | 1929        | Code of the West              | Code of the West              | McGowan, J. P.                    | J.P. McGowan             | tt0019778        |
| 1746415810        | 1917        | 1917        | Lorelei of the Sea            | Lorelei of the Sea            | Otto, Henry                       | Henry Otto               | tt0008215        |
| 1746575031        | 1936        | 1936        | Without Orders                | Without Orders                | Landers, Lew                      | Lew Landers              | tt0028512        |
| 1746520323        | 1924        | 1925        | The Girl on the Stairs        | The Girl on the Stairs        | Worthington, William              | William Worthington      | tt0014948        |
| 1746578060        | 1938        | 1938        | Wanted by the Police          | Wanted by the Police          | Bretherton, Howard                | Howard Bretherton        | tt0030954        |
| 1746561778        | 1956        | 1956        | Attack                        | Attack                        | Aldrich, Robert                   | Robert Aldrich           | tt0048966        |
| 1746512444        | 1910        | 1910        | Spoony Sam                    | Spoony Sam                    |                                   |                          | tt0348747        |
| 1746483862        | 1917        | 1917        | Blue Jeans                    | Blue Jeans                    | Collins, John H.                  | John H. Collins          | tt0007711        |
| 1746498262        | 1917        | 1917        | The Defeat of the City        | The Defeat of the City        | Mills, Thomas R.                  | Thomas R. Mills          | tt0007846        |
| 1746453535        | 1942        | 1942        | Thunder River Feud            | Thunder River Feud            | Luby, S. Roy                      | S. Roy Luby              | tt0035439        |
| 1746420553        | 1992        | 1992        | Patriot Games                 | Patriot Games                 | Noyce, Phillip                    | Phillip Noyce            | tt0105112        |
| 1746566894        | 1934        | 1934        | Enlighten Thy Daughter        | Enlighten Thy Daughter        | Varley, John                      | John Varley              | tt0023988        |
| 1746497478        | 1921        | 1921        | The Bride's Confession        | The Bride's Confession        | Abramson, Ivan                    | Ivan Abramson            | tt0012974        |
| 1746503414        | 1921        | 1921        | Two Minutes To Go             | Two Minutes To Go             | Ray, Charles                      | Charles Ray              | tt0012785        |
| 1746581689        | 1929        | 1928        | Hoofbeats of Vengeance        | Hoofbeats of Vengeance        | MacRae, Henry                     | Henry MacRae             | tt0019998        |
| 1746583936        | 1931        | 1931        | In Line of Duty               | In Line of Duty               | Glennon, Bert                     | Bert Glennon             | tt0021995        |
| 1746578885        | 1963        | 1963        | The Right Hand of the Devil   | The Right Hand of the Devil   |                                   | Aram Katcher             | tt0268576        |

|            |      |      |                                            |                                            |                                      |                       |           |
|------------|------|------|--------------------------------------------|--------------------------------------------|--------------------------------------|-----------------------|-----------|
| 1746509189 | 1925 | 1924 | Always Ridin' To Win                       | Always Ridin' to Win                       | Sheldon, Forrest                     | Forrest Sheldon       | tt0015567 |
| 1746504046 | 1918 | 1918 | The Firebrand                              | The Firebrand                              | Lawrence, Edmund                     | Edmund Lawrence       | tt0009069 |
| 1746532638 | 1923 | 1923 | The Self-Made Wife                         | The Self Made Wife                         | Dillon, Jack                         | John Francis Dillon   | tt0014457 |
| 1746465207 | 1942 | 1942 | Men of Texas                               | Men of Texas                               | Enright, Ray                         | Ray Enright           | tt0035058 |
| 1746561977 | 1956 | 1956 | The Power and the Prize                    | The Power and the Prize                    | Koster, Henry                        | Henry Koster          | tt0049635 |
| 1746555148 | 1955 | 1955 | Pirates of Tripoli                         | Pirates of Tripoli                         | Feist, Felix                         | Felix E. Feist        | tt0048493 |
| 1746566349 | 1954 | 1953 | Wicked Woman                               | Wicked Woman                               | Rouse, Russell                       | Russell Rouse         | tt0047676 |
| 1746453955 | 1998 | 1998 | Dead Man on Campus                         | Dead Man on Campus                         | Cohn, Alan                           | Alan Cohn             | tt0118301 |
| 1745359161 | 2002 | 2002 | The Four Feathers                          | The Four Feathers                          | Kapur, Shekhar                       | Shekhar Kapur         | tt0240510 |
| 1746454057 | 1941 | 1941 | The Return of Daniel Boone                 | The Return of Daniel Boone                 | Hillyer, Lambert                     | Lambert Hillyer       | tt0034096 |
| 1746509241 | 1949 | 1949 | Jigsaw                                     | Jigsaw                                     | Markle, Fletcher                     | Fletcher Markle       | tt0041523 |
| 1746573981 | 1959 | 1959 | Westbound                                  | Westbound                                  | Boetticher, Budd                     | Budd Boetticher       | tt0053441 |
| 1746507781 | 1925 | 1925 | His Greatest Battle                        | His Greatest Battle                        | Hornor, Robert J.                    | Robert J. Hornor      | tt0230295 |
| 1746585138 | 1928 | 1929 | The Cop                                    | Copy                                       | Crisp, Donald                        | Norman Houston        | tt0129011 |
| 1746421187 | 1994 | 1994 | Cabin Boy                                  | Cabin Boy                                  | Resnick, Adam                        | Adam Resnick          | tt0109361 |
| 1746421347 | 1993 | 1992 | Visions of Light                           | Visions of Light                           | Glassman, Arnold ; McCarthy, Todd;   | Arnold Glassman       | tt0105764 |
| 1746554194 | 1965 | 1965 | Laurel and Hardy's Laughing 20's           | Laurel and Hardy's Laughing 20's           |                                      | Robert Youngson       | tt0059379 |
| 1746394213 | 1985 | 1985 | The Stuff                                  | The Stuff                                  | Cohen, Larry                         | Larry Cohen           | tt0090094 |
| 1746584101 | 1939 | 1939 | Three Sons                                 | Three Sons                                 | Hively, Jack                         | Jack Hively           | tt0032031 |
| 1746583394 | 1931 | 1931 | The Deadline                               | The Deadline                               | Hillyer, Lambert                     | Lambert Hillyer       | tt0021789 |
| 1746439132 | 1944 | 1944 | I'm from Arkansas                          | I'm from Arkansas                          | Landers, Lew                         | Lew Landers           | tt0036941 |
| 1746393666 | 1987 | 1987 | Wanted: Dead or Alive                      | Wanted: Dead or Alive                      | Sherman, Gary                        | Gary Sherman          | tt0094293 |
| 1746574527 | 1953 | 1952 | The Four Poster                            | The Four Poster                            | Reis, Irving                         | Irving Reis           | tt0044631 |
| 1746420394 | 1987 | 1987 | Revenge of the Nerds II: Nerds in Paradise | Revenge of the Nerds II: Nerds in Paradise | Roth, Joe                            | Joe Roth              | tt0093857 |
| 1746503710 | 1920 | 1920 | The Woman in the Suitcase                  | The Woman in the Suitcase                  | Niblo, Fred                          | Fred Niblo            | tt0011877 |
| 1746514481 | 1912 | 1912 | At Coney Island                            | At Coney Island                            | Sennett, Mack                        | Mack Sennett          | tt0002034 |
| 1746424226 | 1941 | 1941 | The Gunman from Bodie                      | The Gunman from Bodie                      | Bennet, Spencer                      | Spencer Gordon Bennet | tt0033683 |
| 1746584925 | 1939 | 1939 | The Kid from Texas                         | The Kid from Texas                         | Simon, S. Sylvan                     | S. Sylvan Simon       | tt0031532 |
| 1746582866 | 1937 | 1937 | Seventh Heaven                             | Seventh Heaven                             | King, Henry                          | Henry King            | tt0029539 |
| 1746393273 | 1987 | 1987 | Lethal Weapon                              | Lethal Weapon                              | Donner, Richard                      | Richard Donner        | tt0093409 |
| 1746491878 | 1948 | 1948 | Louisiana Story                            | Louisiana Story                            | Flaherty, Robert                     | Robert J. Flaherty    | tt0040550 |
| 1769969406 | 1965 | 1965 | Chained Girls                              | Chained Girls                              | Mawra, Joseph P.                     | Joseph P. Mawra       | tt0123652 |
| 1746454768 | 2000 | 1999 | The Big Kahuna                             | The Big Kahuna                             | Swanbeck, John                       | John Swanbeck         | tt0189584 |
| 1746582647 | 1939 | 1939 | Conspiracy                                 | Conspiracy                                 | Landers, Lew                         | Lew Landers           | tt0031177 |
| 1746574095 | 1959 | 1959 | Tokyo After Dark                           | Tokyo After Dark                           | Herman, Norman T.                    | Norman T. Herman      | tt0053364 |
| 1746582275 | 1931 | 1931 | So This Is Arizona                         | So This Is Arizona                         | Kirkland, David                      | J.P. McGowan          | tt0267936 |
| 1746200171 | 1969 | 1969 | Generation                                 | Generation                                 | Schaefer, George                     | George Schaefer       | tt0064365 |
| 1746580490 | 1938 | 1938 | Always in Trouble                          | Always in Trouble                          | Santley, Joseph                      | Joseph Santley        | tt0029862 |
| 1769969383 | 1930 | 1930 | Under the Cock-Eyed Moon                   | Under the Cock Eyed Moon                   | Fox, Wallace                         | Wallace Fox           | tt0830690 |
| 1746585373 | 1939 | 1939 | Man from Texas                             | The Man from Texas                         | Herman, Al                           | Albert Herman         | tt0031618 |
| 1769973209 | 1970 | 1970 | Hot Line                                   | Hot Line                                   | Goetz, Tommy                         | Tommy Goetz           | tt0220532 |
| 1746200332 | 1969 | 1968 | The Song and the Silence                   | The Song and the Silence                   | Cohen, Nathan                        | Nathan Cohen          | tt0065018 |
| 1746574624 | 1937 | 1937 | Love in a Bungalow                         | Love in a Bungalow                         | McCarey, Raymond B.                  | Ray McCarey           | tt0029172 |
| 1746570889 | 1935 | 1935 | Grand Old Girl                             | Grand Old Girl                             | Robertson, John                      | John S. Robertson     | tt0026432 |
| 1746492862 | 1944 | 1944 | Are These Our Parents                      | Are These Our Parents?                     | Nigh, William                        | William Nigh          | tt0036609 |
| 1746525172 | 1920 | 1920 | Out of the Dust                            | Out of the Dust                            | McCarthy, John P.                    | John P. McCarthy      | tt0196818 |
| 1745375178 | 2010 | 2010 | Is It Just Me?                             | Is It Just Me?                             | Calciano, J C                        | J.C. Calciano         | tt1533053 |
| 1746554483 | 1964 | 1965 | Country Music on Broadway                  | Country Music on Broadway                  | Duncan, Victor                       | Victor Duncan         | tt0337947 |
| 1746555696 | 1957 | 1957 | The Spirit of St. Louis                    | The Spirit of St. Louis                    | Wilder, Billy                        | Billy Wilder          | tt0051003 |
| 1746584093 | 1936 | 1936 | Times Square Playboy                       | Times Square Playboy                       | McGann, William                      | William C. McGann     | tt0028383 |
| 1746394031 | 1984 | 1984 | The Terminator                             | The Terminator                             | Cameron, James                       | James Cameron         | tt0088247 |
| 1746577657 | 1938 | 1938 | Billy the Kid Returns                      | Billy the Kid Returns                      | Kane, Joe                            | Joseph Kane           | tt0029915 |
| 1746520303 | 1925 | 1925 | The Scarlet West                           | The Scarlet West                           | Adolfi, John G.                      | John G. Adolfi        | tt0016320 |
| 1746569697 | 1954 | 1954 | Two Guns and a Badge                       | Two Guns and a Badge                       | Collins, Lewis D.                    | Lewis D. Collins      | tt0047626 |
| 1746492227 | 1945 | 1945 | Song of the Sarong                         | Song of the Sarong                         | Young, Harold                        | Harold Young          | tt0038103 |
| 1746572105 | 1910 | 1910 | The Egret Hunter                           | The Egret Hunter                           |                                      | Sidney Olcott         | tt0393255 |
| 1746270763 | 1980 | 1980 | No Nukes                                   | No Nukes                                   | Schlossberg, Julian; Goldberg, Danny | Danny Goldberg        | tt0081242 |

|            |      |      |                                       |                                       |                                       |                      |           |
|------------|------|------|---------------------------------------|---------------------------------------|---------------------------------------|----------------------|-----------|
| 1746573869 | 1959 | 1959 | But Not for Me                        | But Not for Me                        | Lang, Walter                          | Walter Lang          | tt0052662 |
| 1746576915 | 1961 | 1961 | The Young Savages                     | The Young Savages                     | Frankenheimer, John                   | John Frankenheimer   | tt0055633 |
| 1746561979 | 1953 | 1953 | Here Come the Girls                   | Here Come the Girls                   | Binyon, Claude                        | Claude Binyon        | tt0045866 |
| 174645492  | 1996 | 1996 | The Craft                             | The Craft                             | Fleming, Andrew                       | Andrew Fleming       | tt0115963 |
| 1746454994 | 1998 | 1998 | I Got the Hook-Up                     | I Got the Hook Up                     | Martin, Michael                       | Michael Martin       | tt0131436 |
| 1746483824 | 1917 | 1917 | The Girl Glory                        | The Girl, Glory                       | Neill, R. William                     | Roy William Neill    | tt0175666 |
| 1746584548 | 1929 | 1929 | Red Hot Rhythm                        | Red Hot Rhythm                        | McCarey, Leo                          | Leo McCarey          | tt0020315 |
| 1746582068 | 1930 | 1930 | Around the Corner                     | Around the Corner                     | Glennon, Bert                         | Bert Glennon         | tt0020650 |
| 1746584311 | 1940 | 1940 | Lucky Cisco Kid                       | Lucky Cisco Kid                       | Humberstone, H. Bruce                 | H. Bruce Humberstone | tt0032732 |
| 1746454522 | 1995 | 1995 | Dangerous Minds                       | Dangerous Minds                       | Smith, John N.                        | John N. Smith        | tt0112792 |
| 1746234411 | 1968 | 1968 | Yours, Mine, and Ours                 | Yours, Mine and Ours                  | Shavelson, Melville                   | Melville Shavelson   | tt0063829 |
| 1746524086 | 1923 | 1923 | Lone Fighter                          | Lone Fighter                          | Russell, Albert                       | Albert Russell       | tt0129206 |
| 1746574785 | 1937 | 1937 | Another Dawn                          | Another Dawn                          | Dieterle, William                     | William Dieterle     | tt0028579 |
| 1746542694 | 1950 | 1950 | The Fighting Stallion                 | The Fighting Stallion                 | Tansey, Robert                        | Robert Emmett Tansey | tt0179810 |
| 1746497017 | 1918 | 1918 | Petticoats and Politics               | Petticoats and Politics               | Mitchell, Howard M.                   | Howard M. Mitchell   | tt0009493 |
| 1746583356 | 1951 | 1951 | The Company She Keeps                 | The Company She Keeps                 | Cromwell, John                        | John Cromwell        | tt0042340 |
| 1746577302 | 1961 | 1961 | Babes in Toyland                      | Babes in Toyland                      | Donohue, Jack                         | Jack Donohue         | tt0054649 |
| 1746235379 | 1971 | 1970 | I Drink Your Blood                    | I Drink Your Blood                    | Durston, David                        | David E. Durston     | tt0067229 |
| 1746434017 | 1989 | 1989 | National Lampoon's Christmas Vacation | National Lampoon's Christmas Vacation | Chechik, Jeremiah                     | Jeremiah S. Chechik  | tt0097958 |
| 1746532748 | 1915 | 1915 | Little Miss Brown                     | The Little Miss Brown                 | Young, James                          | James Young          | tt0005634 |
| 1746435873 | 1998 | 1998 | Practical Magic                       | Practical Magic                       | Dunne, Griffin                        | Griffin Dunne        | tt0120791 |
| 1746567746 | 1933 | 1932 | Rasputin and the Empress              | Rasputin and the Empress              | Boleslavsky, Richard; Brabin, Charles | Richard Boleslawski  | tt0023374 |
| 1746574476 | 1934 | 1934 | Baby Take a Bow                       | Baby, Take a Bow                      | Lachman, Harry                        | Harry Lachman        | tt0024854 |
| 1746574265 | 1959 | 1959 | Darby O'Gill and the Little People    | Darby O'Gill and the Little People    | Stevenson, Robert                     | Robert Stevenson     | tt0052722 |
| 1746569870 | 1960 | 1960 | Gunfighters of Abilene                | Gunfighters of Abilene                | Cahn, Edward L.                       | Edward L. Cahn       | tt0053883 |
| 1746409067 | 1984 | 1984 | Micki + Maude                         | Micki + Maude                         | Edwards, Blake                        | Blake Edwards        | tt0087718 |
| 1746577372 | 1962 | 1962 | Merrill's Marauders                   | Merrill's Marauders                   | Fuller, Samuel                        | Samuel Fuller        | tt0056234 |
| 1746584365 | 1936 | 1936 | Caryl of the Mountains                | Caryl of the Mountains                | Ray, Bernard B.                       | Bernard B. Ray       | tt0027425 |
| 1746585367 | 1940 | 1940 | Isle of Destiny                       | Isle of Destiny                       | Clifton, Elmer                        | Elmer Clifton        | tt0032642 |
| 1746569519 | 1955 | 1954 | Quest for the Lost City               | Quest for the Lost City               |                                       | Dana Lamb            | tt0374984 |
| 1746582388 | 1929 | 1929 | Seven Faces                           | Seven Faces                           | Viertel, Berthold                     | Berthold Viertel     | tt0020387 |
| 1746421726 | 1999 | 1999 | Drop Dead Gorgeous                    | Drop Dead Gorgeous                    | Jann, Michael Patrick                 | Michael Patrick Jann | tt0157503 |
| 1746577511 | 1933 | 1933 | Trick for Trick                       | Trick for Trick                       | MacFadden, Hamilton                   | Hamilton MacFadden   | tt0024698 |
| 1746574915 | 1937 | 1936 | Romeo and Juliet                      | Romeo and Juliet                      | Cukor, George                         | George Cukor         | tt0028203 |
| 1746583822 | 1929 | 1929 | Riders of the Storm                   | Riders of the Storm                   | McGowan, J. P.                        | J.P. McGowan         | tt0020330 |
| 1746542668 | 1925 | 1925 | Canyon Rustlers                       | Canyon Rustlers                       | Webb, Harry                           | Harry S. Webb        | tt0298783 |
| 1746508033 | 1926 | 1926 | The Gypsy Romance                     | The Gypsy Romance                     |                                       |                      | tt0133827 |
| 1746584818 | 1929 | 1929 | Half Marriage                         | Half Marriage                         | Cowen, William J.                     | William J. Cowen     | tt0019957 |
| 1746569608 | 1955 | 1955 | Mad at the World                      | Mad at the World                      | Essex, Harry                          | Harry Essex          | tt0048329 |
| 1746580495 | 1937 | 1937 | Way Out West                          | Way Out West                          | Horne, James W.                       | James W. Horne       | tt0029747 |
| 1746455784 | 1995 | 1995 | Higher Learning                       | Higher Learning                       | Singleton, John                       | John Singleton       | tt0113305 |
| 1746533215 | 1915 | 1915 | Eugene Aram                           | Eugene Aram                           | Ridgely, Richard                      | Richard Ridgely      | tt0005252 |
| 1746507904 | 1926 | 1926 | The Adorable Deceiver                 | The Adorable Deceiver                 | Rosen, Phil                           | Phil Rosen           | tt0016577 |
| 1746500596 | 1926 | 1926 | The Escape                            | The Escape                            | Morante, Milburn                      | Milburn Morante      | tt0016825 |
| 1746574010 | 1961 | 1961 | Scanty Panties                        | Scanty Panties                        | Hornick, Jay                          | Jay Hornick          | tt725934  |
| 1746201132 | 1970 | 1970 | Hi, Mom!                              | Hi, Mom!                              | De Palma, Brian                       | Brian De Palma       | tt0065836 |
| 1746524649 | 1928 | 1928 | The Law's Lash                        | The Law's Lash                        | Smith, Noel Mason                     | Noel M. Smith        | tt0127645 |
| 1746202363 | 1970 | 1969 | The Appointment                       | The Appointment                       | Lumet, Sidney                         | Sidney Lumet         | tt0064035 |
| 1746507780 | 1925 | 1925 | Souls for Sables                      | Souls for Sables                      | McKay, James C.                       | James C. McKay       | tt0016378 |
| 1746584348 | 1939 | 1939 | Wolf Call                             | Wolf Call                             | Waggner, George                       | George Waggner       | tt0032139 |
| 1746499927 | 1950 | 1950 | Duchess of Idaho                      | Duchess of Idaho                      | Leonard, Robert Z.                    | Robert Z. Leonard    | tt0042417 |
| 1746577632 | 1933 | 1933 | The Eagle and the Hawk                | The Eagle and the Hawk                | Walker, Stuart                        | Stuart Walker        | tt0023973 |
| 1746520142 | 1926 | 1926 | Prisoners of the Storm                | Prisoners of the Storm                | Reynolds, Lynn                        | Lynn Reynolds        | tt0017289 |
| 1746524716 | 1927 | 1927 | The Western Whirlwind                 | The Western Whirlwind                 | Rogell, Albert                        | Albert S. Rogell     | tt0018557 |
| 1746475972 | 1948 | 1948 | The Gay Intruders                     | The Gay Intruders                     | McCarey, Ray                          | Ray McCarey          | tt0040384 |
| 1746492238 | 1944 | 1944 | Casanova in Burlesque                 | Casanova in Burlesque                 | Goodwins, Leslie                      | Leslie Goodwins      | tt0036700 |
| 1746474388 | 1944 | 1944 | Knickerbocker Holiday                 | Knickerbocker Holiday                 | Brown, Harry Joe                      | Harry Joe Brown      | tt0036988 |

|                   |             |             |                                       |                                       |                              |                        |                  |
|-------------------|-------------|-------------|---------------------------------------|---------------------------------------|------------------------------|------------------------|------------------|
| 1746584904        | 1940        | 1940        | I Love You Again                      | I Love You Again                      | Van Dyke, W. S.              | W.S. Van Dyke          | tt0032617        |
| 1746576520        | 1931        | 1931        | Girls About Town                      | Girls About Town                      | Cukor, George                | George Cukor           | tt0021910        |
| 1746492246        | 1945        | 1945        | The Unseen                            | The Unseen                            | Allen, Lewis                 | Lewis Allen            | tt0038205        |
| 1746580296        | 1937        | 1937        | Heidi                                 | Heidi                                 | Dwan, Allan                  | Allan Dwan             | tt0028988        |
| 1746573220        | 1932        | 1932        | Madame Butterfly                      | Madame Butterfly                      | Gering, Marion               | Marion Gering          | tt0023169        |
| 1746569867        | 1959        | 1958        | Daddy-O                               | Daddy O                               | Place, Lou                   | Lou Place              | tt0052719        |
| 1746420795        | 1996        | 1996        | Tin Cup                               | Tin Cup                               | Shelton, Ron                 | Ron Shelton            | tt0117918        |
| 1746564518        | 1953        | 1953        | A Blueprint for Murder                | A Blueprint for Murder                | Stone, Andrew                | Andrew L. Stone        | tt0045566        |
| 1746503938        | 1922        | 1922        | Across the Border                     | Across the Border                     | Seeling, Charles R.          | Charles R. Seeling     | tt0012876        |
| 1746567602        | 1933        | 1933        | A Lady's Profession                   | A Lady's Profession                   | McLeod, Norman               | Norman Z. McLeod       | tt0024241        |
| 1746438304        | 1943        | 1943        | The Black Raven                       | The Black Raven                       | Newfield, Sam                | Sam Newfield           | tt0035679        |
| 1746577253        | 1962        | 1962        | The 300 Spartans                      | The 300 Spartans                      | Maté, Rudolph                | Rudolph Maté           | tt0055719        |
| 1746583745        | 1930        | 1930        | Maybe It's Love                       | Maybe It's Love                       | Wellman, William             | William A. Wellman     | tt0021133        |
| 1746553973        | 1965        | 1965        | The Girls on the Beach                | The Girls on the Beach                | Witney, William              | William Witney         | tt0059227        |
| 1746576982        | 1960        | 1960        | The Rise and Fall of Legs Diamond     | The Rise and Fall of Legs Diamond     | Boetticher, Budd             | Budd Boetticher        | tt0054243        |
| 1746574043        | 1960        | 1960        | Ma Barker's Killer Brood              | Ma Barker's Killer Brood              | Karn, Bill                   | Bill Karn              | tt0054041        |
| 1746502186        | 1915        | 1915        | Princess Romanoff                     | Princess Romanoff                     | Powell, Frank                | Frank Powell           | tt0005930        |
| 1746500068        | 1948        | 1947        | Unconquered                           | Unconquered                           | DeMille, Cecil B.            | Cecil B. DeMille       | tt0039931        |
| 1746574960        | 1937        | 1937        | Midnight Court                        | Midnight Court                        | McDonald, Frank              | Frank McDonald         | tt0029238        |
| 1746579043        | 1951        | 1951        | His Kind of Woman                     | His Kind of Woman                     | Farrow, John                 | John Farrow            | tt0043643        |
| 1746492554        | 1945        | 1945        | Leave It to Blondie                   | Leave It to Blondie                   | Berlin, Abby                 | Abby Berlin            | tt0037866        |
| 1746185682        | 1965        | 1965        | Mme. Olga's Massage Parlor            | Mme. Olga's Massage Parlor            | Mawra, Joseph P.             | Joseph P. Mawra        | tt0126448        |
| 1746495709        | 1920        | 1920        | Huckleberry Finn                      | Huckleberry Finn                      | Taylor, William D.           | William Desmond Taylor | tt0011313        |
| 1746454151        | 1997        | 1997        | Private Parts                         | Private Parts                         | Thomas, Betty                | Betty Thomas           | tt0119951        |
| 1746508170        | 1924        | 1924        | Manhattan                             | Manhattan                             | Burnside, R. H.              | R.H. Burnside          | tt0015117        |
| 1746520180        | 1924        | 1924        | Yankee Speed                          | Yankee Speed                          | Bradbury, Robert N.          | Robert N. Bradbury     | tt0015516        |
| 1746497582        | 1919        | 1919        | Are You Legally Married?              | Are You Legally Married?              | Thornby, Robert T.           | Robert Thornby         | tt0185160        |
| 1746580909        | 1938        | 1938        | Slander House                         | Slander House                         | Lamont, Charles              | Charles Lamont         | tt0030763        |
| 1745341625        | 2003        | 2003        | Intolerable Cruelty                   | Intolerable Cruelty                   | Coen, Joel                   | Joel Coen              | tt0138524        |
| 1746574912        | 1936        | 1936        | Rio Grande Romance                    | Rio Grande Romance                    | Hill, Bob                    | Robert F. Hill         | tt0028150        |
| 1746585065        | 1929        | 1929        | Darkened Rooms                        | Darkened Rooms                        | Gasnier, Louis               | Louis J. Gasnier       | tt0019806        |
| 1746394195        | 1988        | 1988        | Mississippi Burning                   | Mississippi Burning                   | Parker, Alan                 | Alan Parker            | tt0095647        |
| 1746500547        | 1926        | 1926        | The High Flyer                        | The High Flyer                        | Brown, Harry J.              | Harry Joe Brown        | tt0016965        |
| 1746502156        | 1915        | 1915        | Pennington's Choice                   | Pennington's Choice                   | Bowman, William              | William Bowman         | tt0005884        |
| 1746577088        | 1959        | 1959        | Gunmen from Laredo                    | Gunmen from Laredo                    | MacDonald, Wallace           | Wallace MacDonald      | tt0052869        |
| 1746582934        | 1937        | 1937        | Larceny on the Air                    | Larceny on the Air                    | Pichel, Irving               | Irving Pichel          | tt0029112        |
| 1746581563        | 1951        | 1951        | Badman's Gold                         | Badman's Gold                         | Tansey, Robert               | Robert Emmett Tansey   | tt0167783        |
| 1746393480        | 1988        | 1988        | Switching Channels                    | Switching Channels                    | Kotcheff, Ted                | Ted Kotcheff           | tt0096203        |
| 1746555618        | 1956        | 1956        | Friendly Persuasion                   | Friendly Persuasion                   | Wylor, William               | William Wylor          | tt0049233        |
| 1746513860        | 1914        | 1914        | Shannon of the Sixth                  | Shannon of the Sixth                  | Melford, George              | George Melford         | tt0004581        |
| <b>1745309570</b> | <b>2007</b> | <b>2007</b> | <b>Mr. Magorium's Wonder Emporium</b> | <b>Mr. Magorium's Wonder Emporium</b> | <b>Helm, Zach</b>            | <b>Zach Helm</b>       | <b>tt0457419</b> |
| 1746424619        | 1941        | 1941        | Badlands of Dakota                    | Badlands of Dakota                    | Green, Alfred E.             | Alfred E. Green        | tt0033370        |
| 1746492574        | 1947        | 1947        | Trail to San Antone                   | Trail to San Antone                   | English, John                | John English           | tt0039909        |
| 1746584627        | 1930        | 1930        | Soldiers and Women                    | Soldiers and Women                    | Sloman, Edward               | Edward Sloman          | tt0021398        |
| 1746421351        | 1993        | 1993        | Wayne's World 2                       | Wayne's World 2                       | Surjik, Stephen              | Stephen Surjik         | tt0108525        |
| 1746565296        | 1932        | 1932        | Red-Headed Woman                      | Red Headed Woman                      | Conway, Jack                 | Jack Conway            | tt0023385        |
| 1745372519        | 2010        | 2010        | Killers                               | Killers                               | Luketic, Robert              | Robert Luketic         | tt1103153        |
| 1746500096        | 1950        | 1950        | Father Is a Bachelor                  | Father Is a Bachelor                  | Foster, Norman; Berlin, Abby | Abby Berlin            | tt0042449        |
| 1746394019        | 1981        | 1981        | Harry's War                           | Harry's War                           | Merrill, Kieth               | Kieth Merrill          | tt0082503        |
| 1746561068        | 1932        | 1932        | Law and Order                         | Law and Order                         | Cahn, Edward L.              | Edward L. Cahn         | tt0023121        |
| 1746504418        | 1918        | 1918        | Cupid's Roundup                       | Cupid's Roundup                       | Le Saint, Edward J.          | Edward LeSaint         | tt0008985        |
| 1746570325        | 1934        | 1934        | The Key                               | The Key                               | Curtiz, Michael              | Michael Curtiz         | tt0025346        |
| 1745374194        | 2001        | 2000        | Lisa Picard Is Famous                 | Lisa Picard Is Famous                 | Dunne, Griffin               | Griffin Dunne          | tt0233699        |
| 1746533186        | 1916        | 1916        | Prudence the Pirate                   | Prudence, the Pirate                  | Parke, William               | William Parke          | tt0007225        |
| 1746248561        | 1967        | 1967        | In Cold Blood                         | In Cold Blood                         | Brooks, Richard              | Richard Brooks         | tt0061809        |
| 1746578777        | 1950        | 1950        | Summer Stock                          | Summer Stock                          | Walters, Charles             | Charles Walters        | tt0043012        |
| 1746507784        | 1949        | 1949        | Edward, My Son                        | Edward, My Son                        | Cukor, George                | George Cukor           | tt0041329        |

|                   |             |             |                               |                               |                                       |                       |                  |   |
|-------------------|-------------|-------------|-------------------------------|-------------------------------|---------------------------------------|-----------------------|------------------|---|
| 1746436355        | 1940        | 1939        | Of Mice and Men               | Of Mice and Men               | Milestone, Lewis                      | Lewis Milestone       | tt0031742        |   |
| <b>1746567003</b> | <b>1933</b> | <b>1933</b> | <b>State Fair</b>             | <b>State Fair</b>             | <b>King, Henry</b>                    | <b>Henry King</b>     | <b>tt0024610</b> | 1 |
| 1746520952        | 1950        | 1950        | Crisis                        | Crisis                        | Brooks, Richard                       | Richard Brooks        | tt0042352        |   |
| 1746501647        | 1916        | 1916        | The Bond Within               | The Bond Within               | Sloman, Edward                        | Edward Sloman         | tt0319089        |   |
| 1746256833        | 1979        | 1979        | All That Jazz                 | All That Jazz                 | Fosse, Bob                            | Bob Fosse             | tt0078754        |   |
| 1746408645        | 1992        | 1992        | Blame It on the Bellboy       | Blame It on the Bellboy       | Herman, Mark                          | Mark Herman           | tt0103827        |   |
| 1746516486        | 1920        | 1920        | Blackbirds                    | Blackbirds                    | Dillon, Jack                          | John Francis Dillon   | tt0010998        |   |
| 1745373535        | 2004        | 2004        | The Chronicles of Riddick     | The Chronicles of Riddick     | Twohy, David                          | David Twohy           | tt0296572        |   |
| 1746566663        | 1952        | 1952        | Bonzo Goes to College         | Bonzo Goes to College         | De Cordova, Frederick                 | Frederick De Cordova  | tt0044436        |   |
| 1746524284        | 1923        | 1923        | Counterfeit Love              | Counterfeit Love              | Sheldon, Roy; Ince, Ralph             | Ralph Ince            | tt0013947        |   |
| 1746496269        | 1919        | 1919        | The Common Cause              | The Common Cause              | Blackton, J. Stuart                   | J. Stuart Blackton    | tt0007817        |   |
| 1746504780        | 1922        | 1922        | The Snowshoe Trail            | The Snowshoe Trail            | Bennett, Chester                      | Chester Bennett       | tt0013615        |   |
| 1746542669        | 1927        | 1927        | Shanghai'd                    | Shanghai'd                    | Ince, Ralph                           | Ralph Ince            | tt0018384        |   |
| 1746563661        | 1952        | 1953        | Meet Me at the Fair           | Meet Me at the Fair           | Sirk, Douglas                         | Douglas Sirk          | tt0046059        |   |
| 1746583616        | 1950        | 1950        | The Sundowners                | The Sundowners                | Templeton, George                     | George Templeton      | tt0043013        |   |
| 1746509521        | 1949        | 1949        | Follow Me Quietly             | Follow Me Quietly             | Fleischer, Richard O.                 | Richard Fleischer     | tt0041378        |   |
| 1746583462        | 1931        | 1931        | The Common Law                | The Common Law                | Stein, Paul L.                        | Paul L. Stein         | tt0021756        |   |
| <b>1746435174</b> | <b>1941</b> | <b>1941</b> | <b>The Stork Pays Off</b>     | <b>The Stork Pays Off</b>     | <b>Landers, Lew</b>                   | <b>Lew Landers</b>    | <b>tt0034234</b> | 1 |
| 1746574862        | 1936        | 1936        | It's Up to You                | It's Up to You                | Cabanne, Christy                      | Christy Cabanne       | tt1825825        |   |
| 1746584210        | 1937        | 1937        | Lancer Spy                    | Lancer Spy                    | Ratoff, Gregory                       | Gregory Ratoff        | tt0029108        |   |
| 1746525078        | 1921        | 1921        | Three Word Brand              | Three Word Brand              | Hillyer, Lambert                      | Lambert Hillyer       | tt0012754        |   |
| 1746524314        | 1916        | 1916        | The Velvet Paw                | The Velvet Paw                | Tourneur, Maurice                     | Maurice Tourneur      | tt0007510        |   |
| 1769970448        | 1965        | 1965        | The Incredible Sex Revolution | The Incredible Sex Revolution | Zugsmith, Albert                      | Albert Zugsmith       | tt0059310        |   |
| 1746514084        | 1916        | 1916        | The Half Million Bribe        | The Half Million Bribe        | Jones, Edgar                          | Edgar Jones           | tt0006754        |   |
| 1746218859        | 1977        | 1977        | Islands in the Stream         | Islands in the Stream         | Schaffner, Franklin J.                | Franklin J. Schaffner | tt0076211        |   |
| 1746512427        | 1916        | 1916        | The Suspect                   | The Suspect                   | Drew, S. Rankin                       | S. Rankin Drew        | tt0007417        |   |
| 1746504010        | 1917        | 1917        | The Avenging Trail            | The Avenging Trail            | Ford, Francis                         | Francis Ford          | tt0007661        |   |
| 1746500523        | 1927        | 1927        | The Swell-Head                | The Swell Head                | Graves, Ralph                         | Ralph Graves          | tt0018458        |   |
| 1746497541        | 1917        | 1917        | Bab's Matinee Idol            | Bab's Matinee Idol            | Dawley, J. Searle                     | J. Searle Dawley      | tt0007668        |   |
| 1746492081        | 1948        | 1948        | Angels' Alley                 | Angels' Alley                 | Beaudine, William                     | William Beaudine      | tt0040097        |   |
| 1746487072        | 1921        | 1921        | Sure Fire                     | Sure Fire                     | Ford, Jack                            | John Ford             | tt0012734        |   |
| 1746532811        | 1915        | 1915        | The House of Fear             | The House of Fear             | Daly, Arnold; Miller, Ashley          | John Ince             | tt0005515        |   |
| 1746503538        | 1917        | 1917        | Her Fighting Chance           | Her Fighting Chance           | Carewe, Edwin                         | Edwin Carewe          | tt0008073        |   |
| 1746582857        | 1938        | 1938        | The Headleys at Home          | The Headleys at Home          | Beute, Chris                          | Chris Beute           | tt0030222        |   |
| 1745374803        | 2009        | 2009        | The Final Destination         | The Final Destination         | Ellis, David R.                       | David R. Ellis        | tt1144884        |   |
| 1769971941        | 1969        | 1969        | Dr. Masher                    | Dr. Masher                    | Maxwell, Alexander                    |                       | tt0217393        |   |
| 1746508919        | 1927        | 1927        | One Increasing Purpose        | One Increasing Purpose        | Beaumont, Harry                       | Harry Beaumont        | tt0018228        |   |
| 1746578828        | 1963        | 1963        | Hootenanny Hoot               | Hootenanny Hoot               | Nelson, Gene                          | Gene Nelson           | tt0057153        |   |
| 1746219334        | 1973        | 1973        | This Is a Hijack              | This Is a Hijack              | Pollack, Barry                        | Barry Pollack         | tt0072277        |   |
| 1745272042        | 2000        | 2000        | Price of Glory                | Price of Glory                | Avila, Carlos                         | Carlos Ávila          | tt0188160        |   |
| 1746496779        | 1921        | 1922        | Stardust                      | Stardust                      | Henley, Hobart                        | Hobart Henley         | tt0166819        |   |
| 1746202597        | 1970        | 1970        | Bloody Mama                   | Bloody Mama                   | Corman, Roger                         | Roger Corman          | tt0065481        |   |
| 1746503300        | 1917        | 1917        | A Doll's House                | A Doll's House                | De Grasse, Joseph                     | Joseph De Grasse      | tt0007867        |   |
| 1746434588        | 1997        | 1997        | Alien Resurrection            | Alien: Resurrection           | Jeunet, Jean-Pierre                   | Jean                  | tt0118583        |   |
| 1746515095        | 1921        | 1921        | Extravagance                  | Extravagance                  | Rosen, Philip E.                      | Phil Rosen            | tt0012145        |   |
| 1746475247        | 1946        | 1946        | Boys' Ranch                   | Boys' Ranch                   | Rowland, Roy                          | Roy Rowland           | tt0038381        |   |
| 1746492075        | 1948        | 1948        | Out of the Storm              | Out of the Storm              | Springsteen, R. G.                    | R.G. Springsteen      | tt0040676        |   |
| 1746520835        | 1925        | 1925        | If I Marry Again              | If I Marry Again              | Dillon, John Francis                  | John Francis Dillon   | tt0015009        |   |
| 1746576896        | 1932        | 1932        | The Most Dangerous Game       | The Most Dangerous Game       | Schoedsack, Ernest B.; Pichel, Irving | Irving Pichel         | tt0023238        |   |
| 1746435248        | 1943        | 1943        | Kid Dynamite                  | Kid Dynamite                  | Fox, Wallace                          | Wallace Fox           | tt0036073        |   |
| 1746503016        | 1917        | 1917        | The Weaker Sex                | The Weaker Sex                | West, Raymond B.                      | Raymond B. West       | tt0184001        |   |
| 1746423980        | 1941        | 1941        | In the Navy                   | In the Navy                   | Lubin, Arthur                         | Arthur Lubin          | tt0033754        |   |
| 1746513155        | 1916        | 1916        | The Sorrows of Love           | The Sorrows of Love           | Giblyn, Charles                       | Charles Giblyn        | tt0158977        |   |
| 1746509579        | 1926        | 1926        | False Friends                 | False Friends                 | Ford, Francis                         | Francis Ford          | tt0325347        |   |
| 1746583391        | 1950        | 1950        | The Palomino                  | The Palomino                  | Nazarro, Ray                          | Ray Nazarro           | tt0042831        |   |
| 1746454361        | 1943        | 1943        | Stormy Weather                | Stormy Weather                | Stone, Andrew                         | Andrew L. Stone       | tt0036391        |   |
| 1746585230        | 1929        | 1929        | The Desert Song               | The Desert Song               | Del Ruth, Roy                         | Roy Del Ruth          | tt0019813        |   |

|            |      |      |                                  |                                  |                                    |                    |           |
|------------|------|------|----------------------------------|----------------------------------|------------------------------------|--------------------|-----------|
| 1746574660 | 1933 | 1932 | Crashin' Broadway                | Crashin' Broadway                | McCarthy, John P.                  | John P. McCarthy   | tt0023914 |
| 1746234648 | 1967 | 1967 | The King's Pirate                | The King's Pirate                | Weis, Don                          | Don Weis           | tt0061867 |
| 1745359582 | 2001 | 2001 | Chop Suey                        | Chop Suey                        | Weber, Bruce                       | Bruce Weber        | tt0276860 |
| 1746516544 | 1920 | 1920 | Whispering Devils                | Whispering Devils                | Voshell, John M.                   | Harry Garson       | tt0011858 |
| 1746509478 | 1927 | 1927 | The Return of Boston Blackie     | The Return of Boston Blackie     | Hoyt, Harry O.                     | Harry O. Hoyt      | tt0018319 |
| 1745293936 | 2005 | 2005 | Proof                            | Proof                            | Madden, John                       | John Madden        | tt0377107 |
| 1745302617 | 2006 | 2006 | Another Gay Movie                | Another Gay Movie                | Stephens, Todd                     | Todd Stephens      | tt0443431 |
| 1745360048 | 2004 | 2004 | Hellboy                          | Hellboy                          | del Toro, Guillermo                | Guillermo del Toro | tt0167190 |
| 1746500557 | 1949 | 1949 | Rimfire                          | Rimfire                          | Eason, B. Reeves                   | B. Reeves Eason    | tt0041811 |
| 1746248748 | 1980 | 1980 | The Blue Lagoon                  | The Blue Lagoon                  | Kleiser, Randal                    | Randal Kleiser     | tt0080453 |
| 1746555982 | 1955 | 1955 | Escape to Burma                  | Escape to Burma                  | Dwan, Allan                        | Allan Dwan         | tt0048044 |
| 1746503843 | 1921 | 1921 | Father Tom                       | Father Tom                       | O'Brien, John B.                   | John B. O'Brien    | tt0131387 |
| 1746486846 | 1918 | 1918 | The Finger of Justice            | The Finger of Justice            | Chaudet, Louis William             | Louis Chaudet      | tt0009068 |
| 1746485565 | 1919 | 1919 | Everybody's Business             | Everybody's Business             | Dawley, J. Searle                  | J. Searle Dawley   | tt0010092 |
| 1746455261 | 1997 | 1997 | Cold Around the Heart            | Cold Around the Heart            | Ridley, John                       | John Ridley        | tt0118870 |
| 1746566304 | 1956 | 1956 | Julie                            | Julie                            | Stone, Andrew L.                   | Andrew L. Stone    | tt0049388 |
| 1746582717 | 1935 | 1935 | Gigolette                        | Gigolette                        | Lamont, Charles                    | Charles Lamont     | tt0026408 |
| 1746512892 | 1915 | 1915 | The Great Ruby                   | The Great Ruby                   | O'Neil, Barry                      | Barry O'Neil       | tt0005418 |
| 1746423499 | 1995 | 1995 | Operation Dumbo Drop             | Operation Dumbo Drop             | Wincer, Simon                      | Simon Wincer       | tt0114048 |
| 1746555606 | 1957 | 1957 | Johnny Tremain                   | Johnny Tremain                   | Stevenson, Robert                  | Robert Stevenson   | tt0050567 |
| 1746559872 | 1963 | 1963 | Soldier in the Rain              | Soldier in the Rain              | Nelson, Ralph                      | Ralph Nelson       | tt0057517 |
| 1746438449 | 1941 | 1941 | The Shepherd of the Hills        | The Shepherd of the Hills        | Hathaway, Henry                    | Henry Hathaway     | tt0034182 |
| 1746504026 | 1919 | 1919 | Brothers Divided                 | Brothers Divided                 | Keenan, Frank                      | Frank Keenan       | tt0187762 |
| 1746570251 | 1933 | 1933 | Man of Action                    | Man of Action                    | Melford, George                    | George Melford     | tt0024299 |
| 1746504735 | 1922 | 1922 | Kindred of the Dust              | Kindred of the Dust              | Walsh, R. A.                       | Raoul Walsh        | tt0013293 |
| 1746577553 | 1938 | 1938 | A Christmas Carol                | A Christmas Carol                | Marin, Edwin L.                    | Edwin L. Marin     | tt0029992 |
| 1746454282 | 1941 | 1941 | Night of January 16th            | The Night of January 16th        | Clemens, William                   | William Clemens    | tt0033954 |
| 1746524701 | 1915 | 1915 | Her Mother's Secret              | Her Mother's Secret              | Thomson, Frederick A.              |                    | tt0312757 |
| 1746503784 | 1918 | 1918 | The Unchastened Woman            | The Unchastened Woman            | Humphrey, William                  | William Humphrey   | tt0009739 |
| 1746424550 | 1943 | 1943 | Wolves of the Range              | Wolves of the Range              | Newfield, Sam                      | Sam Newfield       | tt0036543 |
| 1746574941 | 1936 | 1936 | Silly Billies                    | Silly Billies                    | Guiol, Fred                        | Fred Guiol         | tt0028250 |
| 1746585074 | 1929 | 1929 | The Last of Mrs. Cheyney         | The Last of Mrs. Cheyney         | Franklin, Sidney                   | Sidney Franklin    | tt0020081 |
| 1746434603 | 1992 | 1992 | Dr. Giggles                      | Dr. Giggles                      | Coto, Manny                        | Manny Coto         | tt0104139 |
| 1746580562 | 1938 | 1938 | Outlaw Express                   | Outlaw Express                   | Waggner, George                    | George Waggner     | tt0030537 |
| 1746569895 | 1956 | 1956 | The Toy Tiger                    | The Toy Tiger                    | Hopper, Jerry                      | Jerry Hopper       | tt0049873 |
| 1746584225 | 1939 | 1939 | The Hound of the Baskervilles    | The Hound of the Baskervilles    | Lanfield, Sidney                   | Sidney Lanfield    | tt0031448 |
| 1746554922 | 1965 | 1965 | Sergeant Deadhead                | Sergeant Dead Head               | Taugog, Norman                     | Norman Taugog      | tt0059704 |
| 1746464873 | 1944 | 1944 | Hands Across the Border          | Hands Across the Border          | Kane, Joseph                       | Joseph Kane        | tt0035965 |
| 1746532422 | 1915 | 1915 | The Wolf of Debt                 | The Wolf of Debt                 | Harvey, Jack                       | Jack Harvey        | tt0006300 |
| 1746520897 | 1949 | 1949 | Roseanna McCoy                   | Roseanna McCoy                   | Reis, Irving                       | Irving Reis        | tt0041824 |
| 1746394770 | 1985 | 1985 | Friday the 13th: A New Beginning | Friday the 13th: A New Beginning | Steinmann, Danny                   | Danny Steinmann    | tt0089173 |
| 1746503044 | 1915 | 1914 | The Sins of the Mothers          | The Sins of the Mothers          | Ince, Ralph W.                     | Ralph Ince         | tt0006052 |
| 1746520944 | 1949 | 1948 | Loaded Pistols                   | Loaded Pistols                   | English, John                      | John English       | tt0040543 |
| 1745395979 | 2008 | 2007 | Meet Bill                        | Meet Bill                        | Wallack, Melisa ; Goldmann, Bernie | Bernie Goldmann    | tt0790623 |
| 1746501417 | 1910 | 1910 | The Way of the Red Man           | The Way of the Red Man           | Turner, Otis                       | Otis Turner        | tt0346134 |
| 1746466567 | 1917 | 1917 | The Birth of Patriotism          | The Birth of Patriotism          | Ingleton, E. Magnus                | E. Magnus Ingleton | tt0007704 |
| 1746580597 | 1937 | 1937 | Ridin' the Lone Trail            | Ridin' the Lone Trail            | Newfield, Sam                      | Sam Newfield       | tt0029487 |
| 1746573867 | 1960 | 1960 | Where the Boys Are               | Where the Boys Are               | Levin, Henry                       | Henry Levin        | tt0054469 |
| 1746504385 | 1920 | 1920 | The Cost                         | The Cost                         | Knoles, Harley                     | Harley Knoles      | tt0189446 |
| 1746550309 | 1955 | 1955 | Wiretapper                       | Wiretapper                       | Ross, Dick                         | Dick Ross          | tt0049957 |
| 1746422273 | 1992 | 1992 | Home Alone 2: Lost in New York   | Home Alone 2: Lost in New York   | Columbus, Chris                    | Chris Columbus     | tt0104431 |
| 1746576587 | 1932 | 1932 | The Age of Consent               | The Age of Consent               | LaCava, Gregory                    | Gregory La Cava    | tt0022614 |
| 1746474392 | 1946 | 1946 | Galloping Thunder                | Galloping Thunder                | Nazarro, Ray                       | Ray Nazarro        | tt0038548 |
| 1746410884 | 1994 | 1994 | Timecop                          | Timecop                          | Hyams, Peter                       | Peter Hyams        | tt0111438 |
| 1746583323 | 1929 | 1929 | Lucky In Love                    | Lucky in Love                    | Webb, Kenneth                      | Kenneth S. Webb    | tt0020123 |
| 1746584616 | 1929 | 1929 | Fashions in Love                 | Fashions in Love                 | Schertzing, Victor                 | Victor Schertzing  | tt0019870 |
| 1745302880 | 2006 | 2006 | Dreamgirls                       | Dreamgirls                       | Condon, Bill                       | Bill Condon        | tt0443489 |

|            |      |      |                                            |                                            |                                |                     |           |
|------------|------|------|--------------------------------------------|--------------------------------------------|--------------------------------|---------------------|-----------|
| 1746578490 | 1960 | 1960 | A Dog of Flanders                          | A Dog of Flanders                          | Clark, James B.                | James B. Clark      | tt0052745 |
| 1746583732 | 1930 | 1930 | Sons of the Saddle                         | Sons of the Saddle                         | Brown, Harry J.                | Harry Joe Brown     | tt0021407 |
| 1746533049 | 1914 | 1914 | The Light Unseen                           | The Light Unseen                           | Taylor, Stanley E. V.          | Stanner E.V. Taylor | tt0004225 |
| 1745358890 | 2001 | 2001 | Rush Hour 2                                | Rush Hour 2                                | Ratner, Brett                  | Brett Ratner        | tt0266915 |
| 1746454938 | 1941 | 1941 | Sheriff of Tombstone                       | Sheriff of Tombstone                       | Kane, Joseph                   | Joseph Kane         | tt0034183 |
| 1746508410 | 1927 | 1927 | The Notorious Lady                         | The Notorious Lady                         | Baggot, King                   | King Baggot         | tt0018210 |
| 1746393174 | 1989 | 1989 | Bill & Ted's Excellent Adventure           | Bill & Ted's Excellent Adventure           | Herek, Stephen                 | Stephen Herek       | tt0096928 |
| 1746494396 | 1910 | 1910 | The Woman from Mellon's                    | The Woman from Mellon's                    | Griffith, D. W.                | D.W. Griffith       | tt0001460 |
| 1746514219 | 1910 | 1910 | Lost in the Soudan                         | Lost in the Soudan                         | Turner, Otis                   | Otis Turner         | tt0345588 |
| 1746234518 | 1967 | 1967 | Divorce American Style                     | Divorce American Style                     | Yorkin, Bud                    | Bud Yorkin          | tt0061581 |
| 1746409797 | 1984 | 1983 | The Prodigal                               | The Prodigal                               | Collier, James F.              | James F. Collier    | tt0086146 |
| 1746435891 | 1989 | 1989 | Shirley Valentine                          | Shirley Valentine                          | Gilbert, Lewis                 | Lewis Gilbert       | tt0098319 |
| 1746423567 | 1991 | 1991 | Backdraft                                  | Backdraft                                  | Howard, Ron                    | Ron Howard          | tt0101393 |
| 1746576932 | 1960 | 1960 | The Half Pint                              | The Half Pint                              | Jourdan, Erven                 | Erven Jourdan       | tt0168844 |
| 1746565576 | 1933 | 1933 | Thundering Herd                            | The Thundering Herd                        | Hathaway, Henry                | Henry Hathaway      | tt0025893 |
| 1746503977 | 1917 | 1917 | Trooper 44                                 | Trooper 44                                 | Gahrns, Roy                    | Roy Gahrns          | tt0178079 |
| 1746580750 | 1937 | 1937 | Nudist Land                                | Nudist Land                                | Hortner, A. Royal              | A. Royal Hortner    | tt5710644 |
| 1746508119 | 1925 | 1925 | The Trouble With Wives                     | The Trouble with Wives                     | St. Clair, Malcolm             | Malcolm St. Clair   | tt0016457 |
| 1746500023 | 1924 | 1924 | The White Moth                             | The White Moth                             | Tourneur, Maurice              | Maurice Tourneur    | tt0015492 |
| 1746583748 | 1931 | 1931 | Yankee Don                                 | Yankee Don                                 | Mason, Noel                    | Noel M. Smith       | tt0022581 |
| 1746219537 | 1971 | 1971 | Vanishing Point                            | Vanishing Point                            | Sarafian, Richard C.           | Richard C. Sarafian | tt0067927 |
| 1746582517 | 1935 | 1935 | Don't Bet on Blondes                       | Don't Bet on Blondes                       | Florey, Robert                 | Robert Florey       | tt0026289 |
| 1746420896 | 1996 | 1995 | Angela                                     | Angela                                     | Miller, Rebecca                | Rebecca Miller      | tt0112364 |
| 1746422233 | 1991 | 1991 | House Party 2                              | House Party 2                              | McHenry, Doug; Jackson, George | George Jackson      | tt0102065 |
| 1746584896 | 1940 | 1939 | The Light That Failed                      | The Light That Failed                      | Wellman, William A.            | William A. Wellman  | tt0031572 |
| 1745293389 | 2007 | 2006 | Behind the Mask: The Rise of Leslie Vernon | Behind the Mask: The Rise of Leslie Vernon | Glosserman, Scott              | Scott Glosserman    | tt0437857 |
| 1746465351 | 1942 | 1942 | The Boogie Man Will Get You                | The Boogie Man Will Get You                | Landers, Lew                   | Lew Landers         | tt0034540 |
| 1746248811 | 1973 | 1973 | The Naked Ape                              | The Naked Ape                              | Driver, Donald                 | Donald Driver       | tt0070433 |
| 1746530752 | 1950 | 1950 | The Admiral Was a Lady                     | The Admiral Was a Lady                     | Rogell, Albert S.              | Albert S. Rogell    | tt0042182 |
| 1746576893 | 1932 | 1932 | White Eagle                                | White Eagle                                | Hillyer, Lambert               | Lambert Hillyer     | tt0023693 |
| 1746581199 | 1958 | 1958 | Tarawa Beachhead                           | Tarawa Beachhead                           | Wendkos, Paul                  | Paul Wendkos        | tt0052272 |
| 1746573779 | 1956 | 1956 | Baby Doll                                  | Baby Doll                                  | Kazan, Elia                    | Elia Kazan          | tt0048973 |
| 1769971125 | 1969 | 1969 | A Taste of Hot Lead                        | A Taste of Hot Lead                        | Rotsler, William               | William Rotsler     | tt0174260 |
| 1746491953 | 1948 | 1948 | Macbeth                                    | Macbeth                                    | Welles, Orson                  | Orson Welles        | tt0040558 |
| 1746573658 | 1932 | 1932 | Washington Merry-Go-Round                  | Washington Merry Go Round                  | Cruze, James                   | James Cruze         | tt0023673 |
| 1746419951 | 1981 | 1981 | Reds                                       | Reds                                       | Beatty, Warren                 | Warren Beatty       | tt0082979 |
| 1746578704 | 1962 | 1962 | Hands of a Stranger                        | Hands of a Stranger                        | Arnold, Newt                   | Newt Arnold         | tt0056056 |
| 1745372409 | 2002 | 2002 | The Santa Clause 2                         | The Santa Clause 2                         | Lembeck, Michael               | Michael Lembeck     | tt0304669 |
| 1746410692 | 1983 | 1982 | Vigilante                                  | Vigilante                                  | Lustig, William                | William Lustig      | tt0084867 |
| 1746438453 | 1943 | 1943 | Young Ideas                                | Young Ideas                                | Dassin, Jules                  | Jules Dassin        | tt0036552 |
| 1746577123 | 1961 | 1961 | The Outsider                               | The Outsider                               | Mann, Delbert                  | Delbert Mann        | tt0055270 |
| 1746530690 | 1948 | 1948 | The Tioga Kid                              | The Tioga Kid                              | Taylor, Ray                    | Ray Taylor          | tt0178065 |
| 1746500420 | 1950 | 1950 | Double Deal                                | Double Deal                                | Berlin, Abby                   | Abby Berlin         | tt0042412 |
| 1746560844 | 1932 | 1932 | The Misleading Lady                        | The Misleading Lady                        | Walker, Stuart                 | Stuart Walker       | tt0023229 |
| 1746574598 | 1935 | 1935 | Melody Trail                               | Melody Trail                               | Kane, Joseph                   | Joseph Kane         | tt0026697 |
| 1745372507 | 2004 | 2004 | Taxi                                       | Taxi                                       | Story, Tim                     | Tim Story           | tt0316732 |
| 1746491883 | 1948 | 1948 | Ruthless                                   | Ruthless                                   | Ulmer, Edgar G.                | Edgar G. Ulmer      | tt0040751 |
| 1746484196 | 1917 | 1917 | Magda                                      | Magda                                      | Chautard, Emile                | Emile Chautard      | tt0008244 |
| 1746500731 | 1926 | 1926 | Stepping Along                             | Stepping Along                             | Hines, Charles                 | Charles Hines       | tt0017429 |
| 1746555942 | 1957 | 1957 | Man of a Thousand Faces                    | Man of a Thousand Faces                    | Pevney, Joseph                 | Joseph Pevney       | tt0050681 |
| 1746186015 | 1966 | 1966 | What's Up Tiger Lily?                      | What's Up, Tiger Lily?                     |                                | Woody Allen         | tt0061177 |
| 1746577607 | 1936 | 1936 | It Had to Happen                           | It Had to Happen                           |                                | Roy Del Ruth        | tt0027808 |
| 1746513840 | 1913 | 1913 | The Star of India                          | The Star of India                          | Blaché, Herbert                | Herbert Blaché      | tt0003404 |
| 1746235080 | 1971 | 1971 | Shaft                                      | Shaft                                      | Parks, Gordon                  | Gordon Parks        | tt0067741 |
| 1746559848 | 1964 | 1964 | The Gallant One                            | The Gallant One                            | Stell, Aaron                   | Aaron Stell         | tt0213674 |
| 1746503244 | 1920 | 1920 | The Spirit of Good                         | The Spirit of Good                         | Cazeneuve, Paul                | Paul Cazeneuve      | tt0011724 |
| 1746581510 | 1928 | 1928 | When the Law Rides                         | When the Law Rides                         | De Lacy, Robert                | Robert De Lacy      | tt0019570 |



|            |      |      |                                           |                                          |                                     |                   |           |
|------------|------|------|-------------------------------------------|------------------------------------------|-------------------------------------|-------------------|-----------|
| 1746580764 | 1939 | 1940 | Mad Youth                                 | Mad Youth                                | Shyer, Melville                     | Melville Shyer    | tt0032741 |
| 1746513087 | 1914 | 1914 | The Idler                                 | The Idler                                | Carleton, Lloyd B.                  | Lloyd B. Carleton | tt0004137 |
| 1746233371 | 1967 | 1967 | Double Trouble                            | Double Trouble                           | Taugo, Norman                       | Norman Taurog     | tt0061595 |
| 1746218812 | 1976 | 1976 | All This and World War II                 | All This and World War II                | Winslow, Susan                      | Susan Winslow     | tt0132679 |
| 1746270391 | 1978 | 1978 | Heaven Can Wait                           | Heaven Can Wait                          | Beatty, Warren; Henry, Buck         | Warren Beatty     | tt0077663 |
| 1746503499 | 1920 | 1920 | The Night Riders                          | The Night Rider                          | Butler, Alexander                   | Jay Hunt          | tt0807011 |
| 1746484700 | 1917 | 1917 | Mrs. Balfame                              | Mrs. Balfame                             | Powell, Frank                       | Frank Powell      | tt0008334 |
| 1746508873 | 1924 | 1924 | Battlin' Buckaroo                         | Battlin' Buckaroo                        | Neitz, Alvin J.                     |                   | tt0315811 |
| 1769971421 | 1922 | 1922 | Pardon Me                                 | Pardon Me                                |                                     | Ralph Ceder       | tt0323580 |
| 1746208548 | 1969 | 1969 | The Girl With the Fabulous Box            | The Girl with the Fabulous Box           | Nisbet, Charles                     | Charles Nisbet    | tt3619386 |
| 1746424588 | 1941 | 1941 | Week-End for Three                        | Weekend for Three                        | Reis, Irving                        | Irving Reis       | tt0034378 |
| 1746500200 | 1925 | 1925 | The Crackerjack                           | The Crackerjack                          | Hines, Charles                      | Charles Hines     | tt0015714 |
| 1746580270 | 1937 | 1936 | Fury and the Woman                        | Fury and the Woman                       | Collins, Lewis D.                   | Lewis D. Collins  | tt0028910 |
| 1746501340 | 1914 | 1914 | The Spitfire                              | The Spitfire                             | Porter, Edwin Stanton; Thomson, Fr  | Edwin S. Porter   | tt0004628 |
| 1746197993 | 1966 | 1966 | Once Before I Die                         | Once Before I Die                        | Derek, John                         | John Derek        | tt0059539 |
| 1746582624 | 1938 | 1938 | Kidnapped                                 | Kidnapped                                | Werker, Alfred; Preminger, Otto     | Alfred L. Werker  | tt0030321 |
| 1745341823 | 2004 | 2003 | Baadasssss!                               | Baadasssss!                              | Van Peebles, Mario                  | Mario Van Peebles | tt0367790 |
| 1746453990 | 1999 | 1999 | Sweet and Lowdown                         | Sweet and Lowdown                        | Allen, Woody                        | Woody Allen       | tt0158371 |
| 1746465071 | 1944 | 1944 | Our Hearts Were Young and Gay             | Our Hearts Were Young and Gay            | Allen, Lewis                        | Lewis Allen       | tt0037158 |
| 1746514466 | 1916 | 1916 | Vengeance Is Mine                         | Vengeance Is Mine!                       | Broadwell, Robert B.                | Robert Broadwell  | tt0007511 |
| 1746438953 | 1941 | 1941 | Cavalcade of Faith                        | Cavalcade of Faith                       |                                     | Allyn Butterfield | tt0447887 |
| 1746578460 | 1951 | 1951 | Pals of the Golden West                   | Pals of the Golden West                  |                                     | William Witney    | tt0043898 |
| 1746394180 | 1990 | 1990 | Havana                                    | Havana                                   | Witney, William                     | William Witney    | tt0099747 |
| 1746567275 | 1952 | 1952 | Montana Territory                         | Montana Territory                        | Pollack, Sydney                     | Sydney Pollack    | tt0049211 |
| 1746410823 | 1986 | 1986 | Ruthless People                           | Ruthless People                          | Nazarro, Ray                        | Ray Nazarro       | tt0044921 |
| 1746453761 | 1944 | 1944 | Murder in the Blue Room                   | Murder in the Blue Room                  | Abrahams, Jim; Zucker, David; Zucke | Jim Abrahams      | tt0091877 |
| 1745309114 | 2006 | 2006 | Cocaine Cowboys                           | Cocaine Cowboys                          | Goodwins, Leslie                    | Leslie Goodwins   | tt0037100 |
| 1746436774 | 1999 | 1999 | The Mating Habits of the Earthbound Human | The Mating Habits of the Earthbound Huma | Corben, Billy                       | Billy Corben      | tt0380268 |
| 1745309618 | 2007 | 2007 | Fired!                                    | Fired!                                   | Abugov, Jeff                        | Jeff Abugov       | tt0165874 |
| 1746436921 | 1997 | 1997 | McHale's Navy                             | McHale's Navy                            | Bradley, Chris; LaBrache, Kyle      | Chris Bradley     | tt0816238 |
| 1746454813 | 1946 | 1946 | A Night in Paradise                       | A Night in Paradise                      | Spicer, Bryan                       | Bryan Spicer      | tt0119640 |
| 1746577484 | 1959 | 1959 | The Hanging Tree                          | The Hanging Tree                         | Lubin, Arthur                       | Arthur Lubin      | tt0038778 |
| 1746577078 | 1960 | 1960 | Sex Kittens Go to College                 | Sex Kittens Go to College                | Daves, Delmer; Malden, Karl; Sherm  | Delmer Daves      | tt0052876 |
| 1746574910 | 1933 | 1933 | Diplomaniacs                              | Diplomaniacs                             | Zugsmith, Albert                    | Albert Zugsmith   | tt0054298 |
| 1746524176 | 1922 | 1922 | Defying the Law                           | Defying the Law                          | Seiter, William A.                  | William A. Seiter | tt0023949 |
| 1746514738 | 1910 | 1910 | A Midnight Cupid                          | A Midnight Cupid                         | Horner, Robert J.                   | Robert J. Horner  | tt0321972 |
| 1746520959 | 1949 | 1949 | Joe Palooka in the Counterpunch           | Joe Palooka in The Counterpunch          | Griffith, D. W.                     | D. W. Griffith    | tt0001319 |
| 1746562434 | 1953 | 1953 | Devil's Canyon                            | Devil's Canyon                           | LeBorg, Reginald                    | Reginald Le Borg  | tt0041525 |
| 1746218676 | 1970 | 1970 | Beneath the Planet of the Apes            | Beneath the Planet of the Apes           | Werker, Alfred                      | Alfred L. Werker  | tt0045684 |
| 1746424252 | 1940 | 1940 | We Who Are Young                          | We Who Are Young                         | Post, Ted                           | Ted Post          | tt0065462 |
| 1769969705 | 1911 | 1911 | The Way of the West                       | The Way of the West                      | Bucquet, Harold S.                  | Harold S. Bucquet | tt0033246 |
| 1746520498 | 1949 | 1949 | Alias Nick Beal                           | Alias Nick Beal                          |                                     | Allan Dwan        | tt0433209 |
| 1746577139 | 1958 | 1958 | Ten Days to Tulara                        | Ten Days to Tulara                       | Farrow, John                        | John Farrow       | tt0041107 |
| 1746513438 | 1922 | 1922 | The Broadway Madonna                      | The Broadway Madonna                     | Sherman, George                     | George Sherman    | tt0052282 |
| 1746186229 | 1910 | 1910 | The Actor's Children                      | The Actor's Children                     | Revier, Harry                       | Harry Revier      | tt0012977 |
| 1746577782 | 1935 | 1935 | Dangerous                                 | Dangerous                                | O'Neil, Barry                       | Barry O'Neil      | tt0233154 |
| 1746581016 | 1910 | 1910 | Her First Long Dress                      | Her First Long Dress                     | Green, Alfred E.                    | Alfred E. Green   | tt0026261 |
| 1746509281 | 1926 | 1926 | The Jade Cup                              | The Jade Cup                             |                                     |                   | tt1390947 |
| 1746509519 | 1925 | 1925 | The Verdict of the Desert                 | The Verdict of the Desert                | Crane, Frank Hall                   | Frank Hall Crane  | tt0017006 |
| 1746454501 | 1945 | 1945 | Grissly's Millions                        | Grissly's Millions                       | Hart, Neal                          | Neal Hart         | tt0016485 |
| 1746492861 | 1947 | 1947 | Sarge Goes to College                     | Sarge Goes to College                    | English, John                       | John English      | tt0037752 |
| 1746185535 | 1965 | 1965 | A Very Special Favor                      | A Very Special Favor                     | Jason, Will                         | Will Jason        | tt0039799 |
| 1746500962 | 1910 | 1910 | Simple Charity                            | Simple Charity                           | Gordon, Michael                     | Michael Gordon    | tt0059868 |
| 1746409307 | 1986 | 1986 | Haunted Honeymoon                         | Haunted Honeymoon                        | Griffith, D. W.                     | D. W. Griffith    | tt0001396 |
| 1746499907 | 1950 | 1950 | Mrs. O'Malley and Mr. Malone              | Mrs. O'Malley and Mr. Malone             | Wilder, Gene                        | Gene Wilder       | tt0091178 |
| 1746520810 | 1926 | 1926 | Pleasures of the Rich                     | Pleasures of the Rich                    | Taugo, Norman                       | Norman Taurog     | tt0042755 |
| 1746582497 | 1937 | 1937 | Broadway Melody of 1938                   | Broadway Melody of 1938                  | Gasnier, Louis                      | Louis J. Gasnier  | tt0017270 |
|            |      |      |                                           |                                          | Del Ruth, Roy                       | Roy Del Ruth      | tt0028665 |

|            |      |      |                                |                                |                                  |                       |           |
|------------|------|------|--------------------------------|--------------------------------|----------------------------------|-----------------------|-----------|
| 1746574654 | 1934 | 1934 | Gambling                       | Gambling                       | Lee, Rowland V.                  | Rowland V. Lee        | tt0025160 |
| 1746585277 | 1929 | 1929 | The Smiling Terror             | The Smiling Terror             | Levigard, Josef                  | Joseph Levigard       | tt0020422 |
| 1746570858 | 1934 | 1934 | Brides of Sulu                 | Brides of Sulu                 | Nelson, Jack                     | John Nelson           | tt0024913 |
| 1746574413 | 1959 | 1959 | Forbidden Island               | Forbidden Island               | Griffith, Charles B.             | Charles B. Griffith   | tt0052818 |
| 1746583643 | 1928 | 1928 | Don Juan of the West           | Don Juan of the West           |                                  | Ben F. Wilson         | tt0356544 |
| 1746523051 | 1923 | 1923 | Legally Dead                   | Legally Dead                   | Parke, William                   | William Parke         | tt0014194 |
| 1746574971 | 1936 | 1936 | Forgotten Faces                | Forgotten Faces                | Dupont, E. A.                    | Ewald André Dupont    | tt0027636 |
| 1746569965 | 1962 | 1962 | Married Too Young              | Married Too Young              | Moskov, George                   | George Moskov         | tt0056225 |
| 1746420379 | 1994 | 1994 | Wolf                           | Wolf                           | Nichols, Mike                    | Mike Nichols          | tt0111742 |
| 1746454661 | 1942 | 1942 | Who Is Hope Schuyler?          | Who Is Hope Schuyler?          | Loring, Thos. Z.                 | Thomas Z. Loring      | tt0035556 |
| 1746509334 | 1927 | 1927 | Sky-High Saunders              | Sky High Saunders              | Mitchell, Bruce                  | Bruce Mitchell        | tt0018411 |
| 1746210136 | 1970 | 1970 | The Christine Jorgensen Story  | The Christine Jorgensen Story  | Rapper, Irving                   | Irving Rapper         | tt0065549 |
| 1746393661 | 1985 | 1985 | The Purple Rose of Cairo       | The Purple Rose of Cairo       | Allen, Woody                     | Woody Allen           | tt0089853 |
| 1746569642 | 1958 | 1958 | The Lady Takes a Flyer         | The Lady Takes a Flyer         | Arnold, Jack                     | Jack Arnold           | tt0051839 |
| 1746523058 | 1916 | 1916 | The Decoy                      | The Decoy                      | Lederer, George W.               | George W. Lederer     | tt0006574 |
| 1746582135 | 1931 | 1931 | The Public Enemy               | The Public Enemy               | Wellman, William A.              | William A. Wellman    | tt0022286 |
| 1746435323 | 1989 | 1989 | Shocker                        | Shocker                        | Craven, Wes                      | Wes Craven            | tt0098320 |
| 1746520501 | 1925 | 1925 | The Man in Blue                | The Man in Blue                | Laemmle, Edward                  | Edward Laemmle        | tt0016081 |
| 1746577555 | 1936 | 1936 | And Sudden Death               | And Sudden Death               | Barton, Charles                  | Charles Barton        | tt0027294 |
| 1745293325 | 2005 | 2005 | Deuce Bigalow: European Gigolo | Deuce Bigalow: European Gigolo | Bigelow, Mike                    | Mike Bigelow          | tt0036762 |
| 1746507884 | 1926 | 1926 | Blarney                        | Blarney                        | De Sano, Marcel                  | Marcel De Sano        | tt0016657 |
| 1746218589 | 1971 | 1971 | The Big Doll House             | The Big Doll House             | Hill, Jack                       | Jack Hill             | tt0066830 |
| 1746580470 | 1937 | 1937 | A Family Affair                | A Family Affair                | Seitz, George B.                 | George B. Seitz       | tt0028850 |
| 1746465260 | 1947 | 1947 | Over the Santa Fe Trail        | Over the Santa Fe Trail        | Nazzaro, Ray                     | Ray Nazzaro           | tt0039690 |
| 1746569885 | 1957 | 1957 | Rock Baby-Rock It              | Rock Baby Rock It              | Sporup, Murray Douglas           | Murray Douglas Sporup | tt0050908 |
| 1746511738 | 1923 | 1923 | The Call of the Hills          | The Call of the Hills          | Hornby, Fred                     | Fred Hornby           | tt0013907 |
| 1745342436 | 2001 | 2001 | Shallow Hal                    | Shallow Hal                    | Farrelly, Peter; Farrelly, Bobby | Bobby Farrelly        | tt0256380 |
| 1746571274 | 1933 | 1933 | Laughing at Life               | Laughing at Life               | Beebe, Ford                      | Ford Beebe            | tt0024245 |
| 1746585023 | 1939 | 1939 | Bad Boy                        | Bad Boy                        | Meyer, Herbert                   | Herbert Meyer         | tt0031070 |
| 1746508953 | 1927 | 1927 | The Terror of Bar X            | The Terror of Bar X            | Pembroke, Scott                  | Scott Pembroke        | tt0169300 |
| 1746574813 | 1935 | 1935 | The Lone Bandit                | The Lone Bandit                | McGowan, J. P.                   | J.P. McGowan          | tt0200817 |
| 1746582931 | 1935 | 1935 | Alibi Ike                      | Alibi Ike                      | Enright, Ray                     | Ray Enright           | tt0026055 |
| 1746573983 | 1963 | 1963 | Living Between Two Worlds      | Living Between Two Worlds      | Johnson, Bobby                   | Bobby Johnson         | tt0057256 |
| 1746216839 | 1968 | 1968 | No Way To Treat a Lady         | No Way to Treat a Lady         | Smight, Jack                     | Jack Smight           | tt0063356 |
| 1746569638 | 1956 | 1956 | Frontier Gambler               | Frontier Gambler               | Newfield, Sam                    | Sam Newfield          | tt0049235 |
| 1746475270 | 1946 | 1946 | The Bandit of Sherwood Forest  | The Bandit of Sherwood Forest  | Sherman, George; Levin, Henry    | Henry Levin           | tt0038326 |
| 1746439469 | 1943 | 1943 | Gildersleeve's Bad Day         | Gildersleeve's Bad Day         | Douglas, Gordon                  | Gordon Douglas        | tt0035941 |
| 1746487600 | 1918 | 1918 | The Midnight Burglar           | The Midnight Burglar           | Ensminger, Bert                  | Robert Ensminger      | tt0009370 |
| 1746520818 | 1926 | 1926 | The Old Soak                   | The Old Soak                   | Sloman, Edward                   | Edward Sloman         | tt0017229 |
| 1746578446 | 1960 | 1959 | The Incredible Petrified World | The Incredible Petrified World | Warren, Jerry                    | Jerry Warren          | tt0053944 |
| 1746524120 | 1915 | 1915 | The Clemenceau Case            | The Clemenceau Case            | Brenon, Herbert                  | Herbert Brenon        | tt0005100 |
| 1746583619 | 1929 | 1929 | Rarin' to Go                   | Rarin' to Go                   |                                  | Bryan Foy             | tt1538517 |
| 1746523936 | 1912 | 1912 | Becky Gets a Husband           | Becky Gets a Husband           |                                  |                       | tt1126599 |
| 1746492749 | 1948 | 1947 | I Walk Alone                   | I Walk Alone                   | Haskin, Byron                    | Byron Haskin          | tt0039482 |
| 1746497030 | 1917 | 1917 | Sadie Goes to Heaven           | Sadie Goes to Heaven           | Van Dyke, W. S.                  | W.S. Van Dyke         | tt0182401 |
| 1746492589 | 1948 | 1948 | Fort Apache                    | Fort Apache                    | Ford, John                       | John Ford             | tt0040369 |
| 1746562099 | 1957 | 1957 | Spook Chasers                  | Spook Chasers                  | Blair, George                    | George Blair          | tt0051005 |
| 1746507572 | 1924 | 1924 | The Courageous Coward          | The Courageous Coward          | Hurst, Paul                      | Paul Hurst            | tt0014802 |
| 1745282876 | 2005 | 2005 | Boogeyman                      | Boogeyman                      | Kay, Stephen                     | Stephen Kay           | tt0357507 |
| 1746514440 | 1923 | 1923 | Slow as Lightning              | Slow as Lightning              | Jones, Grover                    | Grover Jones          | tt0165479 |
| 1746491996 | 1944 | 1944 | Passport to Destiny            | Passport to Destiny            | McCarey, Ray                     | Ray McCarey           | tt0037167 |
| 1746559798 | 1964 | 1964 | Pardon My Brush                | Pardon My Brush                | McCarthy, John K.                | John K. McCarthy      | tt0254657 |
| 1746567991 | 1952 | 1952 | Flat Top                       | Flat Top                       | Selander, Lesley                 | Lesley Selander       | tt0044621 |
| 1746583256 | 1928 | 1928 | The Danger Rider               | The Danger Rider               | MacRae, Henry                    | Henry MacRae          | tt0018813 |
| 1746235368 | 1979 | 1979 | The Concorde...Airport '79     | The Concorde... Airport '79    | Rich, David Lowell               | David Lowell Rich     | tt0078740 |
| 1746563905 | 1952 | 1952 | About Face                     | About Face                     | Del Ruth, Roy                    | Roy Del Ruth          | tt0044323 |
| 1746474949 | 1947 | 1947 | The Wild Frontier              | The Wild Frontier              | Ford, Philip                     | Philip Ford           | tt0039995 |

|            |      |      |                               |                               |                                      |                      |           |
|------------|------|------|-------------------------------|-------------------------------|--------------------------------------|----------------------|-----------|
| 1746235362 | 1975 | 1975 | Jaws                          | Jaws                          | Spielberg, Steven                    | Steven Spielberg     | tt0073195 |
| 1746486819 | 1918 | 1918 | The Two-Soul Woman            | The Two Soul Woman            | Clifton, Elmer                       | Elmer Clifton        | tt0009733 |
| 1746419389 | 1991 | 1991 | Mobsters                      | Mobsters                      | Karbelnikoff, Michael                | Michael Karbelnikoff | tt0102460 |
| 1746571259 | 1933 | 1933 | Son of a Sailor               | Son of a Sailor               | Bacon, Lloyd                         | Lloyd Bacon          | tt0024594 |
| 1746565904 | 1953 | 1953 | The Steel Lady                | The Steel Lady                | Dupont, E. A.                        | Ewald André Dupont   | tt0046368 |
| 1746584132 | 1940 | 1940 | Abe Lincoln in Illinois       | Abe Lincoln in Illinois       | Cromwell, John                       | John Cromwell        | tt0032181 |
| 1746561294 | 1956 | 1956 | Hot Rod Girl                  | Hot Rod Girl                  | Martinson, Leslie T.                 | Leslie H. Martinson  | tt0049335 |
| 1746208771 | 1966 | 1966 | Feelin' Good                  | Feelin' Good                  | Pike, James A.                       | James A. Pike        | tt0200634 |
| 1746514918 | 1928 | 1928 | The Lone Patrol               | The Lone Patrol               |                                      | Fred Caldwell        | tt0019108 |
| 1746435707 | 1940 | 1940 | Women in War                  | Women in War                  | Auer, John H.                        | John H. Auer         | tt0033274 |
| 1746420802 | 1983 | 1983 | A Christmas Story             | A Christmas Story             | Clark, Bob                           | Bob Clark            | tt0085334 |
| 1746500184 | 1924 | 1924 | Leave It to Gerry             | Leave It to Gerry             | Gillstrom, Arvid E.                  | Arvid E. Gillstrom   | tt0020089 |
| 1746570746 | 1934 | 1934 | The Witching Hour             | The Witching Hour             | Hathaway, Henry                      | Henry Hathaway       | tt0025998 |
| 1746577296 | 1963 | 1963 | Follow the Boys               | Follow the Boys               | Thorpe, Richard                      | Richard Thorpe       | tt0057066 |
| 1746520182 | 1925 | 1925 | Compromise                    | Compromise                    | Crosland, Alan                       | Alan Crosland        | tt0015701 |
| 1746409119 | 1985 | 1985 | American Flyers               | American Flyers               | Badham, John                         | John Badham          | tt0088707 |
| 1746520916 | 1950 | 1950 | Destination Murder            | Destination Murder            | Cahn, Edward L.                      | Edward L. Cahn       | tt0042394 |
| 1746520392 | 1926 | 1926 | For Heaven's Sake             | For Heaven's Sake             | Taylor, Sam                          | Sam Taylor           | tt0016895 |
| 1746560015 | 1964 | 1963 | The Cool World                | The Cool World                | Clarke, Shirley                      | Shirley Clarke       | tt0056952 |
| 1746512409 | 1914 | 1914 | Tillie's Punctured Romance    | Tillie's Punctured Romance    | Sennett, Mack                        | Mack Sennett         | tt0004707 |
| 1745374168 | 2001 | 2001 | Valentine                     | Valentine                     | Blanks, Jamie                        | Jamie Blanks         | tt0242998 |
| 1745340908 | 2002 | 2002 | The Cockettes                 | The Cockettes                 | Weber, Bill; Weissman, David         | Bill Weber           | tt0303321 |
| 1746434632 | 2000 | 2000 | Coyote Ugly                   | Coyote Ugly                   | McNally, David                       | David McNally        | tt0200550 |
| 1746585008 | 1939 | 1939 | Almost a Gentleman            | Almost a Gentleman            | Goodwins, Leslie                     | Leslie Goodwins      | tt0031035 |
| 1745359380 | 2008 | 2007 | Charlie Bartlett              | Charlie Bartlett              | Poll, Jon                            | Jon Poll             | tt0423977 |
| 1746563057 | 1951 | 1951 | Hurricane Island              | Hurricane Island              | Landers, Lew                         | Lew Landers          | tt0043662 |
| 1746422234 | 1989 | 1989 | Honey, I Shrank the Kids      | Honey, I Shrank the Kids      | Johnston, Joe                        | Joe Johnston         | tt0097523 |
| 1746542625 | 1927 | 1926 | Pirates of the Sky            | Pirates of the Sky            | Andrews, Charles                     | Charles Andrews      | tt0148611 |
| 1746570601 | 1952 | 1952 | Here Come the Marines         | Here Come the Marines         | Beaudine, William                    | William Beaudine     | tt0044700 |
| 1745309572 | 2006 | 2005 | Adam & Steve                  | Adam & Steve                  | Chester, Craig                       | Craig Chester        | tt0372122 |
| 1746569770 | 1953 | 1953 | Project Moon Base             | Project Moon Base             | Talmadge, Richard                    | Richard Talmadge     | tt0046213 |
| 1745373929 | 2009 | 2008 | Lymelife                      | Lymelife                      | Martini, Derick                      | Derick Martini       | tt0363780 |
| 1746473743 | 1941 | 1941 | Tumbledown Ranch in Arizona   | Tumbledown Ranch in Arizona   | Luby, S. Roy                         | S. Roy Luby          | tt0034315 |
| 1746567267 | 1952 | 1952 | Pony Soldier                  | Pony Soldier                  | Newman, Joseph M.                    | Joseph M. Newman     | tt0045041 |
| 1746210845 | 1971 | 1971 | What's the Matter with Helen? | What's the Matter with Helen? | Harrington, Curtis                   | Curtis Harrington    | tt0067975 |
| 1746577166 | 1960 | 1960 | Ice Palace                    | Ice Palace                    | Sherman, Vincent                     | Vincent Sherman      | tt0053936 |
| 1746514492 | 1916 | 1916 | The Flames of Johannis        | The Flames of Johannis        | Lewis, Edgar                         | Edgar Lewis          | tt0133769 |
| 1746217777 | 1966 | 1966 | Moment to Moment              | Moment to Moment              | LeRoy, Mervyn                        | Mervyn LeRoy         | tt0060711 |
| 1746584309 | 1939 | 1939 | The Adventures of Jane Arden  | The Adventures of Jane Arden  | Morse, Terry                         | Terry O. Morse       | tt0031021 |
| 1746198012 | 1967 | 1966 | Chafed Elbows                 | Chafed Elbows                 | Downey, Robert                       | Robert Downey Sr.    | tt0138355 |
| 1746585416 | 1940 | 1940 | Four Sons                     | Four Sons                     | Mayo, Archie                         | Archie Mayo          | tt0032490 |
| 1746582210 | 1928 | 1928 | Thanks for the Buggy Ride     | Thanks for the Buggy Ride     | Seiter, William A.                   | William A. Seiter    | tt0019460 |
| 1746465127 | 1946 | 1946 | Strange Conquest              | Strange Conquest              | Rawlins, John                        | John Rawlins         | tt0038985 |
| 1746577732 | 1933 | 1933 | Treason                       | Treason                       | Seitz, George B.                     | George B. Seitz      | tt0024694 |
| 1745359305 | 2008 | 2007 | Operation Filmmaker           | Operation Filmmaker           | Davenport, Nina                      | Nina Davenport       | tt0984213 |
| 1746496826 | 1920 | 1920 | The Flame of Hellgate         | The Flame of Hellgate         | Middleton, George E.                 | George E. Middleton  | tt0195710 |
| 1746507910 | 1926 | 1926 | Silken Shackles               | Silken Shackles               | Morosco, Walter                      | Walter Morosco       | tt0017391 |
| 1769970699 | 1968 | 1968 | Scarlet Negligee              | Scarlet Négligée              | Scott, Ron                           | Ron Scott            | tt0257105 |
| 1746570437 | 1934 | 1934 | Men in White                  | Men in White                  | Boleslavsky, Richard                 | Richard Boleslawski  | tt0025489 |
| 1746465357 | 1941 | 1941 | Kisses for Breakfast          | Kisses for Breakfast          | Seiler, Lewis                        | Lewis Seiler         | tt0033792 |
| 1746435869 | 1996 | 1995 | Palookaville                  | Palookaville                  | Taylor, Alan                         | Alan Taylor          | tt0117284 |
| 1746581828 | 1929 | 1929 | An Oklahoma Cowboy            | An Oklahoma Cowboy            | Carpenter, H. B.                     | J.P. McGowan         | tt0020235 |
| 1746256221 | 1976 | 1975 | Grey Gardens                  | Grey Gardens                  | Maysles, David; Maysles, Albert; Hov | Ellen Hovde          | tt0073076 |
| 1746473740 | 1942 | 1942 | Prairie Gunsmoke              | Prairie Gunsmoke              | Hillyer, Lambert                     | Lambert Hillyer      | tt0035207 |
| 1746584490 | 1931 | 1931 | Street Scene                  | Street Scene                  | Vidor, King                          | King Vidor           | tt0022436 |
| 1746197882 | 1968 | 1968 | Skidoo                        | Skidoo                        | Preminger, Otto                      | Otto Preminger       | tt0063612 |
| 1745302919 | 2007 | 2007 | Reno 911!: Miami              | Reno 911!: Miami              | Garant, Robert Ben                   | Robert Ben Garant    | tt0499554 |

|            |      |      |                                            |                                            |                                 |                       |           |
|------------|------|------|--------------------------------------------|--------------------------------------------|---------------------------------|-----------------------|-----------|
| 1746564131 | 1952 | 1952 | The Story of Robin Hood and His Merrie Men | The Story of Robin Hood and His Merrie Men | Annakin, Ken                    | Ken Annakin           | tt0045197 |
| 1746514494 | 1910 | 1910 | When the Cat's Away                        | When the Cat's Away                        |                                 |                       | tt1822370 |
| 1746436573 | 1943 | 1943 | The Law Rides Again                        | The Law Rides Again                        | James, Alan                     | Alan James            | tt0036101 |
| 1746575998 | 1931 | 1931 | No Limit                                   | No Limit                                   | Tuttle, Frank                   | Frank Tuttle          | tt0022211 |
| 1746574996 | 1935 | 1935 | Kind Lady                                  | Kind Lady                                  | Seitz, George B.                | George B. Seitz       | tt0027845 |
| 1746509453 | 1950 | 1950 | The Great Jewel Robber                     | The Great Jewel Robber                     | Godfrey, Peter                  | Peter Godfrey         | tt0042521 |
| 1746569855 | 1958 | 1958 | Murder By Contract                         | Murder by Contract                         | Lerner, Irving                  | Irving Lerner         | tt0051959 |
| 1746503263 | 1921 | 1921 | The Bell Hop                               | The Bell Hop                               |                                 | Larry Semon           | tt0011958 |
| 1746454812 | 1944 | 1943 | The Desert Song                            | The Desert Song                            | Florey, Robert                  | Robert Florey         | tt0036755 |
| 1746570061 | 1933 | 1933 | Somewhere in Sonora                        | Somewhere in Sonora                        | Wright, Mack V.                 | Mack V. Wright        | tt0024592 |
| 1746580699 | 1934 | 1934 | The Human Side                             | The Human Side                             | Buzzell, Edward                 | Edward Buzzell        | tt0025276 |
| 1746524637 | 1914 | 1914 | The Walls of Jericho                       | The Walls of Jericho                       | Carleton, Lloyd B.              | Lloyd B. Carleton     | tt0004776 |
| 1769970471 | 1967 | 1967 | Mundo Depravados                           | Mundo depravados                           | Jeffries, Herb                  | Herb Jeffries         | tt0062008 |
| 1746577095 | 1951 | 1951 | Flight to Mars                             | Flight to Mars                             | Selander, Lesley                | Lesley Selander       | tt0043545 |
| 1746409677 | 1982 | 1981 | The Boogens                                | The Boogens                                | Conway, James L.                | James L. Conway       | tt0082094 |
| 1769977777 | 1983 | 1983 | Lianna                                     | Lianna                                     | Sayles, John                    | John Sayles           | tt0085838 |
| 1769974390 | 1916 | 1916 | Destiny                                    | Destiny                                    | Beaumont, Harry                 | Harry Beaumont        | tt0006582 |
| 1745342811 | 2002 | 2002 | Signs                                      | Signs                                      | Shyamalan, M. Night             | M. Night Shyamalan    | tt0286106 |
| 1746516271 | 1920 | 1920 | Her Beloved Villain                        | Her Beloved Villain                        | Wood, Sam                       | Sam Wood              | tt0011282 |
| 1746500485 | 1925 | 1925 | The Four From Nowhere                      | The Four from Nowhere                      | Ford, Francis                   | Francis Ford          | tt0132980 |
| 1746566671 | 1952 | 1952 | Wild Stallion                              | Wild Stallion                              | Collins, Lewis D.               | Lewis D. Collins      | tt0045330 |
| 1746514679 | 1915 | 1915 | A Price for Folly                          | A Price for Folly                          | Baker, George D.                | George D. Baker       | tt0005923 |
| 1746514692 | 1910 | 1910 | The Boy City                               | The Boy City                               |                                 |                       | tt1954893 |
| 1769976138 | 1918 | 1917 | The Slave                                  | The Slave                                  | Gillstrom, Arvid E.             | Arvid E. Gillstrom    | tt0258969 |
| 1746454864 | 2000 | 2000 | Boys and Girls                             | Boys and Girls                             | Iscove, Robert                  | Robert Iscove         | tt0204175 |
| 1746422956 | 1997 | 1997 | love jones                                 | Love Jones                                 | Witcher, Theodore               | Theodore Witcher      | tt0119572 |
| 1746498249 | 1920 | 1920 | Thoughtless Women                          | Thoughtless Women                          | Goodman, Daniel Carson          | Daniel Carson Goodman | tt0011767 |
| 1769971157 | 1969 | 1969 | Wild Outtakes                              | Wild Outtakes                              |                                 | Donald A. Davis       | tt0026142 |
| 1746578557 | 1950 | 1950 | International Burlesque                    | International Burlesque                    | Connell, W. Merle               | W. Merle Connell      | tt0126355 |
| 1746508113 | 1925 | 1925 | Cold Nerve                                 | Cold Nerve                                 | McGowan, J. P.                  | J.P. McGowan          | tt0015696 |
| 1746585400 | 1940 | 1940 | The Courageous Dr. Christian               | The Courageous Dr. Christian               | Vorhaus, Bernard                | Bernard Vorhaus       | tt0032361 |
| 1746516309 | 1920 | 1920 | What's Your Husband Doing?                 | What's Your Husband Doing?                 | Ingraham, Lloyd                 | Lloyd Ingraham        | tt0011852 |
| 1746514652 | 1914 | 1914 | Trapped in the Great Metropolis            | Trapped in the Great Metropolis            |                                 | George K. Rolands     | tt0004725 |
| 1746503360 | 1918 | 1918 | A Son of Strife                            | A Son of Strife                            | Trinchera, Paul                 | Paolo Trinchera       | tt0190022 |
| 1746574556 | 1933 | 1933 | Reform Girl                                | Reform Girl                                | Neufeld, Sam                    | Sam Newfield          | tt0024491 |
| 1746577393 | 1951 | 1951 | Bullfighter and the Lady                   | Bullfighter and the Lady                   | Boetticher, Budd                | Budd Boetticher       | tt0043363 |
| 1746577894 | 1938 | 1938 | Girls on Probation                         | Girls on Probation                         | McGann, William                 | William C. McGann     | tt0030183 |
| 1746438932 | 1941 | 1941 | Mercy Island                               | Mercy Island                               | Morgan, William                 | William Morgan        | tt0033906 |
| 1746438737 | 1995 | 1995 | Hideaway                                   | Hideaway                                   | Leonard, Brett                  | Brett Leonard         | tt0113303 |
| 1746581215 | 1959 | 1959 | The Wild and the Innocent                  | The Wild and the Innocent                  | Sher, Jack                      | Jack Sher             | tt0053445 |
| 1745272248 | 2000 | 2000 | What Lies Beneath                          | What Lies Beneath                          | Zemeckis, Robert                | Robert Zemeckis       | tt0161081 |
| 1746523831 | 1915 | 1915 | Inspiration                                | Inspiration                                | Platt, George Foster            | George Foster Platt   | tt0005551 |
| 1746582490 | 1937 | 1937 | Night Key                                  | Night Key                                  | Corrigan, Lloyd                 | Lloyd Corrigan        | tt0029309 |
| 1745359993 | 2003 | 2003 | Agent Cody Banks                           | Agent Cody Banks                           | Zwart, Harald                   | Harald Zwart          | tt0313911 |
| 1746512925 | 1914 | 1914 | The Littlest Rebel                         | The Littlest Rebel                         | Lewis, Edgar                    | Edgar Lewis           | tt0004244 |
| 1746504040 | 1920 | 1920 | Love, Honor and Obey                       | Love, Honor and Obey                       | Cordova, Leander de             | Leander De Cordova    | tt0196722 |
| 1746513625 | 1927 | 1927 | A Boy of the Streets                       | A Boy of the Streets                       | Hunt, Charles J.                | Charles J. Hunt       | tt0017695 |
| 1746562083 | 1953 | 1953 | Jalopy                                     | Jalopy                                     | Beaudine, William               | William Beaudine      | tt0045926 |
| 1746508201 | 1949 | 1949 | The Blazing Trail                          | The Blazing Trail                          | Nazarro, Ray                    | Ray Nazarro           | tt0041186 |
| 1746439194 | 1998 | 1998 | Pecker                                     | Pecker                                     | Waters, John                    | John Waters           | tt0126604 |
| 1746571263 | 1933 | 1933 | Torch Singer                               | Torch Singer                               | Hall, Alexander; Somnes, George | Alexander Hall        | tt0024685 |
| 1746465288 | 1945 | 1945 | She Went to the Races                      | She Went to the Races                      | Goldbeck, Willis                | Willis Goldbeck       | tt0038083 |
| 1746503500 | 1917 | 1917 | The Amazons                                | The Amazons                                | Kaufman, Joseph                 | Joseph Kaufman        | tt0007631 |
| 1746524234 | 1927 | 1927 | Back to God's Country                      | Back to God's Country                      | Willat, Irvin                   | Irvin Willat          | tt0017655 |
| 1746574894 | 1933 | 1933 | Sing Sinner Sing                           | Sing Sinner Sing                           | Christy, Howard                 | Howard Christie       | tt0024564 |
| 1746577935 | 1935 | 1935 | Age of Indiscretion                        | Age of Indiscretion                        | Ludwig, Edward                  | Edward Ludwig         | tt0026045 |
| 1746554994 | 1964 | 1964 | Island of the Blue Dolphins                | Island of the Blue Dolphins                | Clark, James B.                 | James B. Clark        | tt0058241 |

|            |      |      |                                 |                                 |                                     |                      |           |
|------------|------|------|---------------------------------|---------------------------------|-------------------------------------|----------------------|-----------|
| 1746582859 | 1938 | 1938 | The Port of Missing Girls       | Port of Missing Girls           | Brown, Karl                         | Karl Brown           | tt0030614 |
| 1746503278 | 1921 | 1921 | A Heart To Let                  | A Heart to Let                  | Dillon, Edward                      | Edward Dillon        | tt0012260 |
| 1746561502 | 1955 | 1955 | The Sea Chase                   | The Sea Chase                   | Farrow, John                        | John Farrow          | tt0048593 |
| 1769970428 | 1967 | 1967 | The Game People Play            | The Game People Play            | Johnsen, S. N.                      | Sande N. Johnsen     | tt0137644 |
| 1746235049 | 1974 | 1974 | Phantom of the Paradise         | Phantom of the Paradise         | De Palma, Brian                     | Brian De Palma       | tt0071994 |
| 1746394524 | 1988 | 1987 | Big Bad Mama II                 | Big Bad Mama II                 | Wynorski, Jim                       | Jim Wynorski         | tt0092652 |
| 1746436346 | 1941 | 1941 | Bullets for O'Hara              | Bullets for O'Hara              | Howard, William K.                  | William K. Howard    | tt0033439 |
| 1746554594 | 1963 | 1963 | Papa's Delicate Condition       | Papa's Delicate Condition       | Marshall, George                    | George Marshall      | tt0057400 |
| 1746423979 | 1940 | 1940 | Ghost Valley Raiders            | Ghost Valley Raiders            | Sherman, George                     | George Sherman       | tt0032522 |
| 1746575533 | 1910 | 1910 | Ferdie's Vacation               | Ferdie's Vacation               |                                     |                      | tt0348612 |
| 1746574409 | 1962 | 1962 | The Three Stooges Meet Hercules | The Three Stooges Meet Hercules | Bernds, Edward                      | Edward Berndts       | tt0056579 |
| 1746581554 | 1951 | 1951 | Oh! Susanna                     | Oh! Susanna                     | Kane, Joseph                        | Joseph Kane          | tt0043874 |
| 1746576863 | 1932 | 1932 | Ladies of the Jury              | Ladies of the Jury              | Sherman, Lowell                     | Lowell Sherman       | tt0023108 |
| 1746565915 | 1953 | 1953 | The Man from the Alamo          | The Man from the Alamo          | Boetticher, Budd                    | Budd Boetticher      | tt0046035 |
| 1746559952 | 1964 | 1964 | McHale's Navy                   | McHale's Navy                   | Montagne, Edward J.                 | Edward Montagne      | tt0058336 |
| 1746584036 | 1940 | 1940 | The Mortal Storm                | The Mortal Storm                | Borzage, Frank                      | Frank Borzage        | tt0032811 |
| 1746577186 | 1960 | 1960 | Scent of Mystery                | Scent of Mystery                | Cardiff, Jack                       | Jack Cardiff         | tt0054271 |
| 1746532454 | 1915 | 1915 | The Warning                     | The Warning                     | Lawrence, Edmund                    | Edmund Lawrence      | tt0006242 |
| 1746542627 | 1925 | 1925 | Silent Sheldon                  | Silent Sheldon                  | Webb, Harry                         | Harry S. Webb        | tt0016351 |
| 1746582385 | 1930 | 1930 | Sisters                         | Sisters                         | Flood, James                        | James Flood          | tt0021383 |
| 1746508974 | 1924 | 1924 | A Pair of Hellions              | A Pair of Hellions              | Willis, Walter                      | Walter Willis        | tt0015210 |
| 1746435300 | 1989 | 1989 | Do the Right Thing              | Do the Right Thing              | Lee, Spike                          | Spike Lee            | tt0097216 |
| 1746420511 | 1983 | 1983 | Frightmare                      | Frightmare                      | Vane, Norman Thaddeus               | Norman Thaddeus Vane | tt0083973 |
| 1746218152 | 1967 | 1967 | Hotter After Dark               | Hotter After Dark               |                                     | Mort Shuman          | tt0141209 |
| 1745293757 | 2007 | 2007 | Music and Lyrics                | Music and Lyrics                | Lawrence, Marc                      | Marc Lawrence        | tt0758766 |
| 1769971939 | 1969 | 1969 | And Five Makes Jason            | And Five Makes Jason            | Stagg, William                      | William Stagg        | tt0210503 |
| 1746513120 | 1916 | 1916 | The Innocence of Lizette        | The Innocence of Lizette        | Kirkwood, James                     | James Kirkwood       | tt0125242 |
| 1746524973 | 1927 | 1927 | Galloping Fury                  | Galloping Fury                  | Eason, Reaves                       | B. Reeves Eason      | tt0017913 |
| 1769969910 | 1912 | 1912 | The Arab's Bride                | The Arab's Bride                | Nichols, George O.                  | George Nichols       | tt0002028 |
| 1746502387 | 1915 | 1915 | The Clue                        | The Clue                        | Neill, James; Reicher, Frank        | James Neill          | tt0005103 |
| 1746454480 | 1941 | 1941 | The Miracle Kid                 | The Miracle Kid                 | Beaudine, William                   | William Beaudine     | tt0035067 |
| 1746584966 | 1939 | 1939 | Desperate Trails                | Desperate Trails                | Ray, Albert                         | Albert Ray           | tt0031224 |
| 1746581413 | 1928 | 1928 | The Sheik of Mojave             | The Sheik of Mojave             |                                     |                      | tt0339660 |
| 1746565882 | 1953 | 1953 | The 49th Man                    | The 49th Man                    | Sears, Fred F.                      | Fred F. Sears        | tt0045463 |
| 1746574627 | 1933 | 1933 | The Constant Woman              | The Constant Woman              | Schertzing, Victor                  | Victor Schertzing    | tt0023904 |
| 1746410434 | 1984 | 1984 | The Woman in Red                | The Woman in Red                | Wilder, Gene                        | Gene Wilder          | tt0088414 |
| 1746573724 | 1959 | 1959 | They Came to Cordura            | They Came to Cordura            | Rossen, Robert                      | Robert Rossen        | tt0053351 |
| 1746487149 | 1917 | 1917 | Youth                           | Youth                           | Fielding, Romaine                   | Romaine Fielding     | tt0008799 |
| 1746509468 | 1926 | 1926 | Hands Across the Border         | Hands Across the Border         | Kirkland, David                     | David Kirkland       | tt0016946 |
| 1745342687 | 2003 | 2003 | My Boss's Daughter              | My Boss's Daughter              | Zucker, David                       | David Zucker         | tt0270980 |
| 1746211256 | 1973 | 1973 | The Seven-Ups                   | The Seven Ups                   | D'Antoni, Philip                    | Philip D'Antoni      | tt0070672 |
| 1746520933 | 1949 | 1948 | My Own True Love                | My Own True Love                | Bennett, Compton                    | Compton Bennett      | tt0040629 |
| 1746424004 | 1940 | 1940 | Before I Hang                   | Before I Hang                   | Gride, Nick                         | Nick Grinde          | tt0032245 |
| 1746218864 | 1974 | 1973 | The Last Detail                 | The Last Detail                 | Ashby, Hal                          | Hal Ashby            | tt0070290 |
| 1746512051 | 1914 | 1914 | The Jungle                      | The Jungle                      | Thomas, Augustus; Irving, George He | George Irving        | tt0004182 |
| 1746555313 | 1955 | 1955 | Air Strike                      | Air Strike                      | Roth, Cy                            | Cy Roth              | tt0047805 |
| 1746583663 | 1931 | 1931 | Clearing the Range              | Clearing the Range              | Brower, Otto                        | Otto Brower          | tt0021751 |
| 1746562443 | 1953 | 1953 | White Witch Doctor              | White Witch Doctor              | Hathaway, Henry                     | Henry Hathaway       | tt0046547 |
| 1746575002 | 1937 | 1937 | Live, Love and Learn            | Live, Love and Learn            | Fitzmaurice, Geo.                   | George Fitzmaurice   | tt0029157 |
| 1746501489 | 1916 | 1916 | A Youth of Fortune              | A Youth of Fortune              | Turner, Otis                        | Otis Turner          | tt0007602 |
| 1746583932 | 1928 | 1928 | Dead Man's Curve                | Dead Man's Curve                | Rosson, Richard                     | Richard Rosson       | tt0018818 |
| 1746435724 | 1940 | 1940 | And One Was Beautiful           | And One Was Beautiful           | Sinclair, Robert B.                 | Robert B. Sinclair   | tt0032205 |
| 1746409713 | 1990 | 1990 | Mo' Better Blues                | Mo' Better Blues                | Lee, Spike                          | Spike Lee            | tt0100168 |
| 1746502225 | 1910 | 1910 | Romance of the Lazy K Ranch     | Romance of the Lazy K Ranch     |                                     |                      | tt0348738 |
| 1745372513 | 2003 | 2003 | Cold Mountain                   | Cold Mountain                   | Minghella, Anthony                  | Anthony Minghella    | tt0159365 |
| 1746507814 | 1949 | 1949 | Wild Weed                       | Wild Weed                       | Scott, Sherman                      | Sam Newfield         | tt0041865 |
| 1746454487 | 1944 | 1944 | Three Little Sisters            | Three Little Sisters            | Santley, Joseph                     | Joseph Santley       | tt0037372 |

|            |      |      |                                                        |                                              |                                |                                     |            |
|------------|------|------|--------------------------------------------------------|----------------------------------------------|--------------------------------|-------------------------------------|------------|
| 1746524055 | 1923 | 1923 | The Knock on the Door                                  | The Knock on the Door                        | Curran, William Hughes         | William Hughes Curran               | tt0328036  |
| 1746573744 | 1958 | 1958 | My World Dies Screaming                                | My World Dies Screaming                      | Daniels, Harold                | Harold Daniels                      | tt0051962  |
| 1746583015 | 1940 | 1940 | Anne of Windy Poplars                                  | Anne of Windy Poplars                        | Hively, Jack                   | Jack Hively                         | tt0032211  |
| 1746569726 | 1957 | 1957 | Apache Warrior                                         | Apache Warrior                               | Williams, Elmo                 | Elmo Williams                       | tt0050131  |
| 1746500684 | 1925 | 1925 | Accused                                                | Accused                                      | Henderson, Dell                | Dell Henderson                      | tt0015536  |
| 1746584863 | 1930 | 1930 | Be Yourself!                                           | Be Yourself!                                 | Freeland, Thornton             | Thornton Freeland                   | tt0020670  |
| 1746562118 | 1957 | 1957 | Hell Ship Mutiny                                       | Hell Ship Mutiny                             | Sholem, Lee; Williams, Elmo    | Lee Sholem                          | tt0050497  |
| 1746512650 | 1917 | 1917 | Heart Strings                                          | Heart Strings                                | Holubar, Allan                 | Allen Holubar                       | tt0008063  |
| 1746574754 | 1938 | 1938 | Rawhide                                                | Rawhide                                      | Taylor, Ray                    | Ray Taylor                          | tt0030655  |
| 1746455605 | 1996 | 1996 | Star Trek: First Contact                               | Star Trek: First Contact                     | Frakes, Jonathan               | Jonathan Frakes                     | tt0117731  |
| 1746585231 | 1928 | 1928 | Five and Ten Cent Annie                                | Five and Ten Cent Annie                      | Del Ruth, Roy                  | Roy Del Ruth                        | tt0018894  |
| 1746497622 | 1919 | 1919 | Red Blood and Yellow                                   | Red Blood and Yellow                         | Robbins, Jesse J.              | Gilbert M. 'Broncho Billy' Anderson | tt0192517  |
| 1746487869 | 1917 | 1917 | Passion                                                | Passion                                      | Ridgely, Richard               | Richard Ridgely                     | tt0181755  |
| 1746533211 | 1914 | 1914 | Too Late                                               | Too Late                                     |                                | Marshall Farnum                     | tt1198662  |
| 1746583980 | 1939 | 1939 | Rose of Washington Square                              | Rose of Washington Square                    | Ratoff, Gregory                | Gregory Ratoff                      | tt0031877  |
| 1746524516 | 1923 | 1923 | Why Worry?                                             | Why Worry?                                   | Newmeyer, Fred; Taylor, Sam    | Fred C. Newmeyer                    | tt0014611  |
| 1746423760 | 1992 | 1992 | The Power of One                                       | The Power of One                             | Avildsen, John G.              | John G. Avildsen                    | tt0105159  |
| 1746577458 | 1958 | 1958 | Young and Wild                                         | Young and Wild                               | Witney, William                | William Witney                      | tt0052416  |
| 1746497593 | 1917 | 1917 | The Planter                                            | The Planter                                  | Heffron, T. N.                 | Thomas N. Heffron                   | tt0008437  |
| 1746562218 | 1955 | 1955 | Tarzan's Hidden Jungle                                 | Tarzan's Hidden Jungle                       | Schuster, Harold               | Harold D. Schuster                  | tt0048699  |
| 1746585240 | 1930 | 1930 | Under a Texas Moon                                     | Under a Texas Moon                           | Curtiz, Michael                | Michael Curtiz                      | tt0021503  |
| 1746574381 | 1962 | 1962 | Tales of Terror                                        | Tales of Terror                              | Corman, Roger                  | Roger Corman                        | tt0056552  |
| 1746577321 | 1963 | 1963 | Common Law Wife                                        | Common Law Wife                              | Sayers, Eric                   | Eric Sayers                         | tt0123722  |
| 1746584862 | 1929 | 1929 | Unmasked                                               | Unmasked                                     | Lewis, Edgar                   | Edgar Lewis                         | tt0020537  |
| 1745309270 | 2006 | 2006 | The Hills Have Eyes                                    | The Hills Have Eyes                          | Aja, Alexandre                 | Alexandre Aja                       | tt0454841  |
| 1746492588 | 1944 | 1944 | Song of the Open Road                                  | Song of the Open Road                        | Simon, S. Sylvan               | S. Sylvan Simon                     | tt0037297  |
| 1745309228 | 2005 | 2005 | Saw II                                                 | Saw II                                       | Bousman, Darren Lynn           | Darren Lynn Bousman                 | tt0432348  |
| 1746583140 | 1938 | 1938 | In Old Chicago                                         | In Old Chicago                               | King, Henry                    | Henry King                          | tt0029047  |
| 1746514111 | 1916 | 1916 | The Hunted Woman                                       | The Hunted Woman                             | Drew, S. Rankin                | S. Rankin Drew                      | tt0006836  |
| 1746500029 | 1946 | 1946 | Behind Green Lights                                    | Behind Green Lights                          | Brower, Otto                   | Otto Brower                         | tt0038346  |
| 1746184541 | 1965 | 1965 | Ship of Fools                                          | Ship of Fools                                | Kramer, Stanley                | Stanley Kramer                      | tt0059712  |
| 1746524791 | 1914 | 1914 | Burning Daylight: the Adventures of "Burning Daylight" | Burning Daylight: The Adventures of 'Burnin' | Bosworth, Hobart               | Hobart Bosworth                     | tt0003732  |
| 1769970635 | 1968 | 1968 | Deep Inside                                            | Deep Inside                                  | Sarno, Joe                     | Joseph W. Sarno                     | tt0060294  |
| 1746567945 | 1933 | 1933 | I Loved a Woman                                        | I Loved a Woman                              | Green, Alfred E.               | Alfred E. Green                     | tt0024160  |
| 1746475938 | 1945 | 1945 | Great Stagecoach Robbery                               | Great Stagecoach Robbery                     | Selander, Lesley               | Lesley Selander                     | tt00217521 |
| 1746578058 | 1935 | 1935 | Enchanted April                                        | Enchanted April                              | Beaumont, Harry                | Harry Beaumont                      | tt0026313  |
| 1746570201 | 1952 | 1952 | Captain Pirate                                         | Captain Pirate                               | Murphy, Ralph                  | Ralph Murphy                        | tt0044475  |
| 1745359425 | 2003 | 2003 | Daddy Day Care                                         | Daddy Day Care                               | Carr, Steve                    | Steve Carr                          | tt0317303  |
| 1746507851 | 1924 | 1924 | The Siren of Seville                                   | The Siren of Seville                         | Storm, Jerome; Stromberg, Hunt | Jerome Storm                        | tt0015337  |
| 1746198217 | 1969 | 1969 | The Mafia Girls                                        | Mafia Girls                                  | Ross, Ed                       | Ed Ross                             | tt0243398  |
| 1746500201 | 1924 | 1924 | Listen Lester                                          | Listen Lester                                | Seiter, William A.             | William A. Seiter                   | tt0015073  |
| 1746570170 | 1933 | 1933 | From Headquarters                                      | From Headquarters                            | Dieterle, William              | William Dieterle                    | tt0024040  |
| 1746585426 | 1939 | 1939 | Inside Story                                           | Inside Story                                 | Cortez, Ricardo                | Ricardo Cortez                      | tt0031488  |
| 1746576910 | 1951 | 1951 | Gold Raiders                                           | Gold Raiders                                 | Bernds, Edward                 | Edward Berndts                      | tt0043591  |
| 1746583494 | 1930 | 1930 | Cameo Kirby                                            | Cameo Kirby                                  | Cummings, Irving               | Irving Cummings                     | tt0020728  |
| 1745293695 | 2006 | 2006 | She's the Man                                          | She's the Man                                | Fickman, Andy                  | Andy Fickman                        | tt0454945  |
| 1746455155 | 1998 | 1998 | Out of Sight                                           | Out of Sight                                 | Soderbergh, Steven             | Steven Soderbergh                   | tt0120780  |
| 1746520513 | 1927 | 1927 | Tea for Three                                          | Tea for Three                                | Leonard, Robert Z.             | Robert Z. Leonard                   | tt0018467  |
| 1746512194 | 1915 | 1915 | The Woman Pays                                         | The Woman Pays                               | Jones, Edgar                   | Edgar Jones                         | tt0006303  |
| 1746465204 | 1943 | 1943 | A Stranger in Town                                     | A Stranger in Town                           | Rowland, Roy                   | Roy Rowland                         | tt0036395  |
| 1746575670 | 1932 | 1932 | Igloo                                                  | Igloo                                        | Scott, Ewing                   | Ewing Scott                         | tt0023050  |
| 1746584821 | 1930 | 1930 | Check and Double Check                                 | Check and Double Check                       | Brown, Melville                | Melville W. Brown                   | tt0020758  |
| 1746423541 | 1940 | 1940 | Keeping Company                                        | Keeping Company                              | Simon, S. Sylvan               | S. Sylvan Simon                     | tt0033782  |
| 1746219598 | 1977 | 1976 | Eaten Alive!                                           | Eaten Alive                                  | Hooper, Tobe                   | Tobe Hooper                         | tt0074455  |
| 1745358030 | 2008 | 2008 | Shine a Light                                          | Shine a Light                                | Scorsese, Martin               | Martin Scorsese                     | tt0893382  |
| 1746569829 | 1956 | 1956 | The Young Guns                                         | The Young Guns                               | Band, Albert                   | Albert Band                         | tt0049974  |
| 1746437392 | 1943 | 1943 | Coney Island                                           | Coney Island                                 | Lang, Walter                   | Walter Lang                         | tt0035749  |

|            |      |      |                                |                                |                                        |                      |           |
|------------|------|------|--------------------------------|--------------------------------|----------------------------------------|----------------------|-----------|
| 1746500226 | 1927 | 1927 | The Reckless Mollycoddle       | The Reckless Mollycoddle       |                                        | Tony D'Algy          | tt0018309 |
| 1745272300 | 2001 | 2000 | Big Eden                       | Big Eden                       | Bezucha, Thomas                        | Thomas Bezucha       | tt0212815 |
| 1746393328 | 1982 | 1982 | The Atomic Cafe                | The Atomic Cafe                | Rafferty, Kevin; Loader, Jayne; Raffer | Jayne Loader         | tt0083590 |
| 1746208530 | 1968 | 1968 | Nobody's Perfect               | Nobody's Perfect               | Rafkin, Alan                           | Alan Rafkin          | tt0063361 |
| 1746504028 | 1919 | 1919 | The Lottery Man                | The Lottery Man                | Cruze, James                           | James Cruze          | tt0010389 |
| 1746394421 | 1985 | 1985 | Fright Night                   | Fright Night                   | Holland, Tom                           | Tom Holland          | tt0089175 |
| 1746560147 | 1964 | 1964 | The Trial of Lee Harvey Oswald | The Trial of Lee Harvey Oswald | Buchanan, Larry                        | Larry Buchanan       | tt0058687 |
| 1746508675 | 1925 | 1925 | Before Midnight                | Before Midnight                | Adolfi, John                           | John G. Adolfi       | tt0015611 |
| 1745340057 | 2004 | 2004 | Mean Girls                     | Mean Girls                     | Waters, Mark                           | Mark Waters          | tt0377092 |
| 1746523078 | 1915 | 1915 | The Eternal City               | The Eternal City               | Porter, Edwin S.; Ford, Hugh           | Hugh Ford            | tt0005250 |
| 1746516482 | 1920 | 1921 | Bachelor Apartments            | Bachelor Apartments            | Walker, Johnny                         | Johnnie Walker       | tt0010977 |
| 1746454732 | 2000 | 2000 | Hanging Up                     | Hanging Up                     | Keaton, Diane                          | Diane Keaton         | tt0162983 |
| 1746574765 | 1936 | 1935 | Professional Soldier           | Professional Soldier           | Garnett, Tay                           | Tay Garnett          | tt0028143 |
| 1746234905 | 1968 | 1968 | Moonshiner's Woman             | Moonshiner's Woman             | Davison, D. E.                         | Donn Davison         | tt0202479 |
| 1746455600 | 1999 | 1999 | Lake Placid                    | Lake Placid                    | Miner, Steve                           | Steve Miner          | tt0139414 |
| 1769970744 | 1912 | 1912 | The Broken Lease               | The Broken Lease               | Walsh, F. S.                           | F.S. Walsh           | tt0338815 |
| 1746533160 | 1915 | 1915 | The Woman Who Lied             | The Woman Who Lied             | Henderson, Lucius                      | Lucius Henderson     | tt0006305 |
| 1746503927 | 1918 | 1918 | The Velvet Hand                | The Velvet Hand                | Gerrard, Douglas                       | Douglas Gerrard      | tt0009756 |
| 1746560905 | 1932 | 1932 | Klondike                       | Klondike                       | Rosen, Phil                            | Phil Rosen           | tt0023096 |
| 1746502125 | 1916 | 1916 | Her Husband's Wife             | Her Husband's Wife             | Abramson, Ivan                         | Ivan Abramson        | tt0006793 |
| 1746501409 | 1910 | 1910 | Seth's Temptation              | Seth's Temptation              | Olcott, Sidney                         | Sidney Olcott        | tt0397627 |
| 1746410455 | 1989 | 1988 | Heathers                       | Heathers                       | Lehmann, Michael                       | Michael Lehmann      | tt0097493 |
| 1746515764 | 1918 | 1918 | Jack Spurlock, Prodigal        | Jack Spurlock, Prodigal        | Harbaugh, Carl                         | Carl Harbaugh        | tt0009236 |
| 1746561553 | 1932 | 1932 | 70,000 Witnesses               | 70,000 Witnesses               | Murphy, Ralph                          | Ralph Murphy         | tt0022603 |
| 1746583718 | 1930 | 1930 | Follow the Leader              | Follow the Leader              | Taugog, Norman                         | Norman Taugog        | tt0020895 |
| 1746585185 | 1929 | 1929 | Her Private Affair             | Her Private Affair             | Stein, Paul                            | Paul L. Stein        | tt0019979 |
| 1746199053 | 1967 | 1967 | Lupe                           | Lupe                           | Rodriguez-Soltero, José                | José Rodriguez       | tt0242623 |
| 1746577119 | 1958 | 1958 | Step Down to Terror            | Step Down to Terror            | Keller, Harry                          | Harry Keller         | tt0052245 |
| 1746219567 | 1979 | 1979 | The Seduction of Joe Tynan     | The Seduction of Joe Tynan     | Schatzberg, Jerry                      | Jerry Schatzberg     | tt0079875 |
| 1746569699 | 1957 | 1957 | The Burglar                    | The Burglar                    | Wendkos, Paul                          | Paul Wendkos         | tt0049035 |
| 1746210668 | 1973 | 1973 | Shamus                         | Shamus                         | Kulik, Buzz                            | Buzz Kulik           | tt0070680 |
| 1746394732 | 1990 | 1990 | Internal Affairs               | Internal Affairs               | Figgis, Mike                           | Mike Figgis          | tt0099850 |
| 1746500675 | 1924 | 1924 | The Other Kind of Love         | The Other Kind of Love         | Worne, Duke                            | Duke Worne           | tt0015203 |
| 1745293396 | 2006 | 2006 | Deja Vu                        | Deja Vu                        | Scott, Tony                            | Tony Scott           | tt0453467 |
| 1746578724 | 1959 | 1959 | I, Mobster                     | I Mobster                      | Corman, Roger                          | Roger Corman         | tt0051760 |
| 1746465238 | 1946 | 1946 | Somewhere in the Night         | Somewhere in the Night         | Mankiewicz, Joseph L.                  | Joseph L. Mankiewicz | tt0038965 |
| 1746509303 | 1925 | 1925 | Dick Turpin                    | Dick Turpin                    | Blystone, John G.                      | John G. Blystone     | tt0015750 |
| 1746435719 | 1941 | 1941 | Cheers for Miss Bishop         | Cheers for Miss Bishop         | Garnett, Tay                           | Tay Garnett          | tt0033459 |
| 1746501653 | 1915 | 1915 | Playing Dead                   | Playing Dead                   | Drew, Sidney                           | Sidney Drew          | tt0005901 |
| 1746183815 | 1910 | 1910 | Bootles' Baby                  | Bootles' Baby                  | Miller, Ashley                         | Ashley Miller        | tt1542608 |
| 1746508278 | 1925 | 1925 | The Prairie Pirate             | The Prairie Pirate             | Mortimer, Edmund                       | Edmund Mortimer      | tt0016238 |
| 1746573837 | 1957 | 1957 | 5 Steps to Danger              | 5 Steps to Danger              | Kesler, Henry S.                       | Henry S. Kesler      | tt0050087 |
| 1746532977 | 1915 | 1915 | The Lone Star Rush             | The Lone Star Rush             | Mitchell, Edmund                       | Edmund Mitchell      | tt0005644 |
| 1746491787 | 1948 | 1948 | Overland Trails                | Overland Trails                | Hillyer, Lambert                       | Lambert Hillyer      | tt0040678 |
| 1746579002 | 1962 | 1962 | The Counterfeit Traitor        | The Counterfeit Traitor        | Seaton, George                         | George Seaton        | tt0055871 |
| 1746532821 | 1923 | 1923 | Rosita                         | Rosita                         | Lubitsch, Ernst                        | Ernst Lubitsch       | tt0014416 |
| 1746580650 | 1937 | 1937 | All-American Sweetheart        | All American Sweetheart        | Hillyer, Lambert                       | Lambert Hillyer      | tt0028570 |
| 1746474499 | 1942 | 1942 | Too Many Women                 | Too Many Women                 | Ray, Bernard B.                        | Bernard B. Ray       | tt0035454 |
| 1746571366 | 1933 | 1933 | The Prizefighter and the Lady  | The Prizefighter and the Lady  | Van Dyke, W. S.                        | W.S. Van Dyke        | tt0024475 |
| 1746581746 | 1950 | 1950 | Train to Tombstone             | Train to Tombstone             | Berke, William                         | William Berke        | tt0043064 |
| 1746503906 | 1920 | 1920 | Fixed by George                | Fixed by George                | Moran, Lee; Lyons, Eddie               | Eddie Lyons          | tt0011188 |
| 1746500574 | 1924 | 1924 | Week End Husbands              | Week End Husbands              | Griffith, E. H.                        | Edward H. Griffith   | tt0015475 |
| 1746394685 | 1985 | 1985 | Weird Science                  | Weird Science                  | Hughes, John                           | John Hughes          | tt0090305 |
| 1746475290 | 1948 | 1948 | Mexican Hayride                | Mexican Hayride                | Barton, Charles T.                     | Charles Barton       | tt0040582 |
| 1746392901 | 1985 | 1985 | Stick                          | Stick                          | Reynolds, Burt                         | Burt Reynolds        | tt0090073 |
| 1746421575 | 1981 | 1981 | Death Hunt                     | Death Hunt                     | Hunt, Peter                            | Peter R. Hunt        | tt0082247 |
| 1746208912 | 1966 | 1966 | The Wild Angels                | The Wild Angels                | Corman, Roger                          | Roger Corman         | tt0061189 |

|            |      |      |                                                  |                                                |                                    |                     |           |
|------------|------|------|--------------------------------------------------|------------------------------------------------|------------------------------------|---------------------|-----------|
| 1746503034 | 1916 | 1916 | The Battle of Life                               | The Battle of Life                             | Vincent, James                     | James Vincent       | tt0006404 |
| 1746211047 | 1972 | 1972 | The Little Ark                                   | The Little Ark                                 | Clark, James B.                    | James B. Clark      | tt0068864 |
| 1746409514 | 1992 | 1992 | Final Impact                                     | Final Impact                                   | Merhi, Joseph ; Smoke, Steven      | Joseph Merhi        | tt0104267 |
| 1746581121 | 1959 | 1959 | The Flying Fontaines                             | The Flying Fontaines                           | Sherman, George                    | George Sherman      | tt0052814 |
| 1746566101 | 1953 | 1953 | Valley of Head Hunters                           | Valley of Head Hunters                         | Berke, William                     | William Berke       | tt0046491 |
| 1746569567 | 1957 | 1957 | Joe Dakota                                       | Joe Dakota                                     | Bartlett, Richard                  | Richard Bartlett    | tt0050565 |
| 1746467655 | 1917 | 1917 | The Scarlet Crystal                              | The Scarlet Crystal                            | Swickard, Charles                  | Charles Swickard    | tt0008542 |
| 1746554848 | 1954 | 1954 | Ricochet Romance                                 | Ricochet Romance                               | Lamont, Charles                    | Charles Lamont      | tt0047410 |
| 1746564137 | 1952 | 1951 | The African Queen                                | The African Queen                              | Huston, John                       | John Huston         | tt0043265 |
| 1746503379 | 1919 | 1919 | When a Man Rides Alone                           | When a Man Rides Alone                         | King, Henry                        | Henry King          | tt0009791 |
| 1746455128 | 1995 | 1995 | Never Talk to Strangers                          | Never Talk to Strangers                        | Hall, Peter                        | Peter Hall          | tt0113965 |
| 1746500382 | 1926 | 1926 | The Greater Glory                                | The Greater Glory                              | Rehfeld, Curt                      | Curt Rehfeld        | tt0016940 |
| 1746393381 | 1988 | 1987 | Someone to Love                                  | Someone to Love                                | Jaglom, Henry                      | Henry Jaglom        | tt0094007 |
| 1746566048 | 1957 | 1957 | The Big Caper                                    | The Big Caper                                  | Stevens, Robert                    | Robert Stevens      | tt0050190 |
| 1746439485 | 1945 | 1945 | Circumstantial Evidence                          | Circumstantial Evidence                        | Larkin, John                       | John Francis Larkin | tt0037598 |
| 1746530741 | 1949 | 1949 | Flaxy Martin                                     | Flaxy Martin                                   | Bare, Richard                      | Richard L. Bare     | tt0041374 |
| 1746503634 | 1919 | 1919 | Wild Oats                                        | Wild Oats                                      | Williams, C. J.                    | C.J. Williams       | tt0138824 |
| 1746455414 | 1997 | 1996 | Schizopolis                                      | Schizopolis                                    | Soderbergh, Steven                 | Steven Soderbergh   | tt0117561 |
| 1746424613 | 1943 | 1943 | The Man from Thunder River                       | The Man from Thunder River                     | English, John                      | John English        | tt0036134 |
| 1746208453 | 1966 | 1966 | Troublemakers                                    | Troublemakers                                  | Machover, Robert; Fruchter, Norman | Norman Fruchter     | tt0205715 |
| 1746573800 | 1959 | 1959 | The Rookie                                       | The Rookie                                     | O'Hanlon, George                   | George O'Hanlon     | tt0053224 |
| 1746570362 | 1952 | 1952 | Something for the Birds                          | Something for the Birds                        | Wise, Robert                       | Robert Wise         | tt0045173 |
| 1746516315 | 1922 | 1922 | One Glorious Day                                 | One Glorious Day                               | Cruze, James                       | James Cruze         | tt0013459 |
| 1746439689 | 1999 | 1999 | Big Daddy                                        | Big Daddy                                      | Dugan, Dennis                      | Dennis Dugan        | tt0142342 |
| 1746565946 | 1953 | 1953 | Last of the Pony Riders                          | Last of the Pony Riders                        | Archainbaud, George                | George Archainbaud  | tt0045987 |
| 1746219014 | 1980 | 1980 | The Fog                                          | The Fog                                        | Carpenter, John                    | John Carpenter      | tt0080749 |
| 1746582973 | 1938 | 1937 | Hollywood Hotel                                  | Hollywood Hotel                                | Berkeley, Busby                    | Busby Berkeley      | tt0029010 |
| 1746584075 | 1935 | 1935 | Murder in the Fleet                              | Murder in the Fleet                            | Sedgwick, Edward                   | Edward Sedgwick     | tt0026742 |
| 1746218890 | 1976 | 1976 | Bound for Glory                                  | Bound for Glory                                | Ashby, Hal                         | Hal Ashby           | tt0074235 |
| 1745302784 | 2006 | 2006 | Wrestling with Angels -- Playwright Tony Kushner | Wrestling with Angels: Playwright Tony Kushner | Mock, Freida Lee                   | Freida Lee Mock     | tt0493081 |
| 1746580681 | 1938 | 1938 | Little Tough Guy                                 | Little Tough Guy                               | Young, Harold                      | Harold Young        | tt0030378 |
| 1746202414 | 1970 | 1970 | The Grasshopper                                  | The Grasshopper                                | Paris, Jerry                       | Jerry Paris         | tt0065795 |
| 1769976116 | 1926 | 1926 | Nobody's Business                                | Nobody's Business                              | Taurog, Norman                     | Norman Taurog       | tt0347677 |
| 1746567309 | 1933 | 1933 | The Fighting Parson                              | The Fighting Parson                            | Fraser, Harry                      | Harry L. Fraser     | tt0024010 |
| 1746574964 | 1936 | 1936 | Modern Times                                     | Modern Times                                   | Chaplin, Charlie                   | Charles Chaplin     | tt0027977 |
| 1746520291 | 1925 | 1925 | Pals                                             | Pals                                           | McCarthy, John P.                  | John P. McCarthy    | tt0016197 |
| 1745342915 | 2004 | 2004 | Outfoxed: Rupert Murdoch's War on Journalism     | Outfoxed: Rupert Murdoch's War on Journalism   | Greenwald, Robert                  | Robert Greenwald    | tt0418038 |
| 1745373551 | 2008 | 2008 | Never Back Down                                  | Never Back Down                                | Wadlow, Jeff                       | Jeff Wadlow         | tt1023111 |
| 1746534794 | 1921 | 1921 | The March Hare                                   | The March Hare                                 | Campbell, Maurice                  | Maurice Campbell    | tt0012447 |
| 1746186012 | 1969 | 1969 | The First Time                                   | The First Time                                 | Neilson, James; Grasshoff, Alex    | James Neilson       | tt0064331 |
| 1746453670 | 1998 | 1998 | Phantoms                                         | Phantoms                                       | Chappelle, Joe                     | Joe Chappelle       | tt0119891 |
| 1746248735 | 1975 | 1975 | The Killer Elite                                 | The Killer Elite                               | Peckinpah, Sam                     | Sam Peckinpah       | tt0073240 |
| 1746514581 | 1922 | 1922 | A Daughter of Luxury                             | A Daughter of Luxury                           | Powell, Paul                       | Paul Powell         | tt0013053 |
| 1746434364 | 1989 | 1989 | Pet Sematary                                     | Pet Sematary                                   | Lambert, Mary                      | Mary Lambert        | tt0098084 |
| 1746509523 | 1926 | 1926 | King of the Saddle                               | King of the Saddle                             | Craft, William J.                  | William James Craft | tt0017030 |
| 1745302381 | 2005 | 2005 | This Divided State                               | This Divided State                             | Greenstreet, Steven                | Steven Greenstreet  | tt0444698 |
| 1746577647 | 1934 | 1934 | Change of Heart                                  | Change of Heart                                | Blystone, John G.                  | John G. Blystone    | tt0024965 |
| 1746583922 | 1929 | 1929 | Howdy Broadway                                   | Howdy Broadway                                 |                                    | Charles J. Hunt     | tt0020005 |
| 1746503773 | 1918 | 1918 | The Demon                                        | The Demon                                      | Baker, George D.                   | George D. Baker     | tt0009004 |
| 1746495804 | 1919 | 1919 | You Never Know Your Luck                         | You Never Know Your Luck                       | Powell, Frank                      | Frank Powell        | tt0010927 |
| 1746503950 | 1921 | 1921 | The Girl From Porcupine                          | The Girl from Porcupine                        | Henderson, Dell                    | Dell Henderson      | tt0133799 |
| 1746520185 | 1924 | 1924 | Curlytop                                         | Curlytop                                       | Elvey, Maurice                     | Maurice Elvey       | tt0014812 |
| 1746584214 | 1938 | 1938 | Danger on the Air                                | Danger on the Air                              | Garrett, Otis                      | Otis Garrett        | tt0030037 |
| 1746436244 | 1992 | 1992 | Universal Soldier                                | Universal Soldier                              | Emmerich, Roland                   | Roland Emmerich     | tt0105698 |
| 1746464836 | 1946 | 1946 | Claudia and David                                | Claudia and David                              | Lang, Walter                       | Walter Lang         | tt0038416 |
| 1746232973 | 1969 | 1969 | Backtrack                                        | Backtrack!                                     | Bellamy, Earl                      | Earl Bellamy        | tt0064059 |
| 1745359385 | 2008 | 2008 | Box Elder                                        | Box Elder                                      | Sklar, Todd                        | Todd Sklar          | tt1215458 |



|            |      |      |                              |                              |                              |                                     |           |
|------------|------|------|------------------------------|------------------------------|------------------------------|-------------------------------------|-----------|
| 1746199222 | 1969 | 1968 | Operation Cross Eagles       | Operation Cross Eagles       | Conte, Richard               | Richard Conte                       | tt0064767 |
| 1746483159 | 1917 | 1916 | Intrigue                     | The Intrigue                 | Robertson, John              | Frank Lloyd                         | tt0006865 |
| 1746423843 | 1941 | 1941 | The Great Mr. Nobody         | The Great Mr. Nobody         | Stoloff, Ben                 | Benjamin Stoloff                    | tt0033678 |
| 1746577925 | 1936 | 1936 | Mummy's Boys                 | Mummy's Boys                 | Guiol, Fred                  | Fred Guiol                          | tt0027999 |
| 1746550289 | 1957 | 1957 | Gun Glory                    | Gun Glory                    | Rowland, Roy                 | Roy Rowland                         | tt0050467 |
| 1746423752 | 1996 | 1996 | Manny & Lo                   | Manny & Lo                   | Krueger, Lisa                | Lisa Krueger                        | tt0116985 |
| 1746563370 | 1953 | 1953 | The Big Heat                 | The Big Heat                 | Lang, Fritz                  | Fritz Lang                          | tt0045555 |
| 1746561518 | 1955 | 1954 | Mambo                        | Mambo                        | Rossen, Robert               | Robert Rossen                       | tt0047207 |
| 1746509067 | 1925 | 1925 | Let Women Alone              | Let Women Alone              | Powell, Paul                 | Paul Powell                         | tt0016016 |
| 1746561954 | 1953 | 1953 | Fair Wind to Java            | Fair Wind to Java            | Kane, Joseph                 | Joseph Kane                         | tt0045743 |
| 1746208895 | 1968 | 1968 | The Shoes of the Fisherman   | The Shoes of the Fisherman   | Anderson, Michael            | Michael Anderson                    | tt0063599 |
| 1746500710 | 1949 | 1949 | The Story of Molly X         | The Story of Molly X         | Wilbur, Crane                | Crane Wilbur                        | tt0041922 |
| 1746488041 | 1918 | 1918 | Fires of Youth               | Fires of Youth               | Julian, Rupert               | Rupert Julian                       | tt0009072 |
| 1746566194 | 1953 | 1953 | Return to Paradise           | Return to Paradise           | Robson, Mark                 | Mark Robson                         | tt0046238 |
| 1746233132 | 1969 | 1969 | Sweet Charity                | Sweet Charity                | Fosse, Bob                   | Bob Fosse                           | tt0065054 |
| 1746578025 | 1937 | 1937 | Women of Glamour             | Women of Glamour             | Wiles, Gordon                | Gordon Wiles                        | tt0029794 |
| 1746577651 | 1933 | 1933 | Night Flight                 | Night Flight                 | Brown, Clarence              | Clarence Brown                      | tt0024381 |
| 1746549828 | 1955 | 1955 | Sudden Danger                | Sudden Danger                | Cornfield, Hubert            | Hubert Cornfield                    | tt0048672 |
| 1746565490 | 1952 | 1952 | Denver & Rio Grande          | Denver and Rio Grande        | Haskin, Byron                | Byron Haskin                        | tt0044537 |
| 1746584193 | 1935 | 1935 | Crime and Punishment         | Crime and Punishment         | Sternberg, Josef von         | Josef von Sternberg                 | tt0026246 |
| 1746514894 | 1910 | 1910 | Take Me Out to the Ball Game | Take Me Out to the Ball Game | Anderson, G. M.              | Gilbert M. 'Broncho Billy' Anderson | tt0001408 |
| 1746474079 | 1947 | 1947 | Exposed                      | Exposed                      | Blair, George                | George Blair                        | tt0039361 |
| 1746584987 | 1940 | 1940 | Misbehaving Husbands         | Misbehaving Husbands         | Beaudine, William            | William Beaudine                    | tt0032799 |
| 1746582230 | 1930 | 1930 | Burning Up                   | Burning Up                   | Sutherland, A. Edward        | A. Edward Sutherland                | tt0020718 |
| 1746566238 | 1953 | 1953 | The Man Behind the Gun       | The Man Behind the Gun       | Feist, Felix                 | Felix E. Feist                      | tt0044872 |
| 1769970067 | 1912 | 1912 | A Modern Highwayman          | A Modern Highwayman          | Turner, Otis                 | Otis Turner                         | tt0039399 |
| 1746465340 | 1947 | 1947 | The Guilt of Janet Ames      | The Guilt of Janet Ames      | Levin, Henry; Vidor, Charles | Henry Levin                         | tt0039438 |
| 1746561351 | 1932 | 1932 | Man from New Mexico          | The Man from New Mexico      | McGowan, J. P.               | J.P. McGowan                        | tt0023184 |
| 1746464819 | 1945 | 1945 | Follow That Woman            | Follow That Woman            | Landers, Lew                 | Lew Landers                         | tt0037712 |
| 1746561192 | 1965 | 1965 | Bus Riley's Back in Town     | Bus Riley's Back in Town     | Hart, Harvey                 | Harvey Hart                         | tt0058998 |
| 1746584666 | 1930 | 1930 | The Rampant Age              | The Rampant Age              | Rosen, Phil                  | Phil Rosen                          | tt0021284 |
| 1746454047 | 1941 | 1941 | You're in the Army Now       | You're in the Army Now       | Seiler, Lewis                | Lewis Seiler                        | tt0034411 |
| 1746465295 | 1942 | 1942 | Priorities on Parade         | Priorities on Parade         | Rogell, Albert S.            | Albert S. Rogell                    | tt0035216 |
| 1746439455 | 1998 | 1997 | Unmade Beds                  | Unmade Beds                  | Barker, Nicholas             | Nicholas Barker                     | tt0127952 |
| 1746507596 | 1923 | 1923 | The Heart Raider             | The Heart Raider             | Ruggles, Wesley              | Wesley Ruggles                      | tt0014120 |
| 1746562104 | 1954 | 1954 | New Faces                    | New Faces                    | Horner, Harry                | Harry Horner                        | tt0044963 |
| 1746579040 | 1959 | 1959 | The Five Pennies             | The Five Pennies             | Shavelson, Melville          | Melville Shavelson                  | tt0052809 |
| 1746409943 | 1988 | 1988 | Salsa                        | Salsa                        | Davidson, Boaz               | Boaz Davidson                       | tt0096030 |
| 1746571357 | 1952 | 1952 | Desperadoes' Outpost         | Desperadoes' Outpost         | Ford, Philip                 | Philip Ford                         | tt0044542 |
| 1746574592 | 1933 | 1933 | Private Detective 62         | Private Detective 62         | Curtiz, Michael              | Michael Curtiz                      | tt0024471 |
| 1746584942 | 1940 | 1940 | The Sea Hawk                 | The Sea Hawk                 | Curtiz, Michael              | Michael Curtiz                      | tt0033028 |
| 1746437381 | 1941 | 1940 | The Great Dictator           | The Great Dictator           | Chaplin, Charles             | Charles Chaplin                     | tt0032553 |
| 1746524247 | 1915 | 1915 | Mortmain                     | Mortmain                     | Marston, Theodore            | Theodore Marston                    | tt0005772 |
| 1746219653 | 1979 | 1979 | The China Syndrome           | The China Syndrome           | Bridges, James               | James Bridges                       | tt0078966 |
| 1746520456 | 1925 | 1925 | Saddle Cyclone               | The Saddle Cyclone           | Thorpe, Richard              | Richard Thorpe                      | tt0159715 |
| 1746423564 | 1999 | 1999 | The Bachelor                 | The Bachelor                 | Sinyor, Gary                 | Gary Sinyor                         | tt0120596 |
| 1746200000 | 1966 | 1966 | Chamber of Horrors           | Chamber of Horrors           | Averback, Hy                 | Hy Averback                         | tt0060228 |
| 1746416016 | 1917 | 1917 | The Lady of the Photograph   | The Lady of the Photograph   | Turbett, Ben                 | Ben Turbett                         | tt0176911 |
| 1746568137 | 1952 | 1952 | Models Inc.                  | Models Inc.                  | LeBorg, Reginald             | Reginald Le Borg                    | tt0044912 |
| 1746584118 | 1939 | 1939 | The Devil's Daughter         | The Devil's Daughter         | Leonard, Arthur              | Arthur H. Leonard                   | tt0031229 |
| 1746532648 | 1916 | 1916 | Naked Hearts                 | Naked Hearts                 | Julian, Rupert               | Rupert Julian                       | tt0007113 |
| 1746523036 | 1916 | 1916 | Her Great Hour               | Her Great Hour               | Taylor, S. E. V.             | Stanner E.V. Taylor                 | tt0157746 |
| 1746532649 | 1923 | 1923 | The Daring Years             | The Daring Years             | Webb, Kenneth                | Kenneth S. Webb                     | tt0013974 |
| 1746515809 | 1919 | 1919 | The Woman Michael Married    | The Woman Michael Married    | Kolker, Henry                | Henry Kolker                        | tt0010910 |
| 1746503062 | 1915 | 1915 | The Circular Staircase       | The Circular Staircase       | LeSaint, Edward J.           | Edward LeSaint                      | tt0005095 |
| 1746581998 | 1910 | 1910 | In the Tall Grass Country    | In the Tall Grass Country    |                              | William F. Haddock                  | tt0361744 |
| 1746581637 | 1910 | 1910 | Girlies                      | Girlies                      |                              | Sam Morris                          | tt1149225 |

|            |      |      |                                       |                                       |                                  |                                     |           |
|------------|------|------|---------------------------------------|---------------------------------------|----------------------------------|-------------------------------------|-----------|
| 1746392758 | 1984 | 1984 | Love Streams                          | Love Streams                          | Cassavetes, John                 | John Cassavetes                     | tt0087644 |
| 1746423549 | 1940 | 1940 | Opened by Mistake                     | Opened by Mistake                     | Archainbaud, George              | George Archainbaud                  | tt0032876 |
| 1746504763 | 1922 | 1922 | A Blind Bargain                       | A Blind Bargain                       | Worsley, Wallace                 | Wallace Worsley                     | tt0012949 |
| 1745282716 | 2006 | 2006 | Sherrybaby                            | Sherrybaby                            | Collyer, Laurie                  | Laurie Collyer                      | tt0423169 |
| 1746410383 | 1983 | 1983 | Valley Girl                           | Valley Girl                           | Coolidge, Martha                 | Martha Coolidge                     | tt0086525 |
| 1746270380 | 1980 | 1979 | Silent Scream                         | The Silent Scream                     | Harris, Denny                    | Denny Harris                        | tt0081515 |
| 1746439435 | 1997 | 1997 | Excess Baggage                        | Excess Baggage                        | Brambilla, Marco                 | Marco Brambilla                     | tt0119086 |
| 1746573742 | 1958 | 1958 | Tonka                                 | Tonka                                 | Foster, Lewis R.                 | Lewis R. Foster                     | tt0052300 |
| 1746524640 | 1916 | 1916 | The Green Swamp                       | The Green Swamp                       | Sidney, Scott                    | Scott Sidney                        | tt0006743 |
| 1746422135 | 1999 | 1999 | The 13th Warrior                      | The 13th Warrior                      | McTiernan, John                  | John McTiernan                      | tt0120657 |
| 1746509559 | 1925 | 1925 | My Pal                                | My Pal                                | Hayes, Ward                      | Ward Hayes                          | tt0016136 |
| 1746581382 | 1910 | 1910 | The Little Prospector                 | The Little Prospector                 |                                  | Gilbert M. 'Broncho Billy' Anderson | tt0001288 |
| 1746565930 | 1953 | 1953 | Stolen Identity                       | Stolen Identity                       | Fritsch, Gunther                 | Gunther von Fritsch                 | tt0046372 |
| 1746580449 | 1938 | 1938 | Annabel Takes a Tour                  | Annabel Takes a Tour                  | Landers, Lew                     | Lew Landers                         | tt0029872 |
| 1746499890 | 1923 | 1923 | The Fourth Musketeer                  | The Fourth Musketeer                  | Howard, William K.               | William K. Howard                   | tt0014058 |
| 1746508399 | 1927 | 1927 | The Rose of Kildare                   | The Rose of Kildare                   | Fitzgerald, Dallas M.            | Dallas M. Fitzgerald                | tt0018342 |
| 1745342864 | 2004 | 2004 | Anchorman: The Legend of Ron Burgundy | Anchorman: The Legend of Ron Burgundy | McKay, Adam                      | Adam McKay                          | tt0357413 |
| 1746421188 | 1992 | 1992 | Radio Flyer                           | Radio Flyer                           | Donner, Richard                  | Richard Donner                      | tt0105211 |
| 1746573859 | 1958 | 1958 | The True Story of Lynn Stuart         | The True Story of Lynn Stuart         | Seiler, Lewis                    | Lewis Seiler                        | tt0052322 |
| 1746453545 | 1944 | 1944 | Weird Woman                           | Weird Woman                           | LeBorg, Reginald                 | Reginald Le Borg                    | tt0037453 |
| 1746219587 | 1980 | 1980 | Resurrection                          | Resurrection                          | Petrie, Daniel                   | Daniel Petrie                       | tt0081414 |
| 1746553510 | 1963 | 1963 | Savage Sam                            | Savage Sam                            | Tokar, Norman                    | Norman Tokar                        | tt0057473 |
| 1746211266 | 1973 | 1973 | Serpico                               | Serpico                               | Lumet, Sidney                    | Sidney Lumet                        | tt0070666 |
| 1746577687 | 1935 | 1935 | The Daring Young Man                  | The Daring Young Man                  | Seiter, William A.               | William A. Seiter                   | tt0026263 |
| 1746578382 | 1962 | 1962 | Hero's Island                         | Hero's Island                         | Stevens, Leslie                  | Leslie Stevens                      | tt0056065 |
| 1746566350 | 1955 | 1955 | Sincerely Yours                       | Sincerely Yours                       | Douglas, Gordon                  | Gordon Douglas                      | tt0048623 |
| 1746500537 | 1925 | 1925 | The Danger Zone                       | The Danger Zone                       | Bradbury, Robert N.              | Robert N. Bradbury                  | tt0015729 |
| 1746435317 | 1991 | 1991 | Blue Desert                           | Blue Desert                           | Battersby, Bradley               | Bradley Battersby                   | tt0101486 |
| 1746186042 | 1969 | 1968 | Buona Sera, Mrs. Campbell             | Buona Sera, Mrs. Campbell             | Frank, Melvin                    | Melvin Frank                        | tt0062767 |
| 1746520087 | 1924 | 1924 | Ridgeway of Montana                   | Ridgeway of Montana                   | Smith, Clifford S.               | Clifford Smith                      | tt0015278 |
| 1746208723 | 1969 | 1969 | Linda and Abilene                     | Linda and Abilene                     | Hansen, Mark                     | Herschell Gordon Lewis              | tt0064590 |
| 1746520651 | 1949 | 1949 | C-Man                                 | 'C' Man                               | Lerner, Joseph                   | Joseph Lerner                       | tt0041218 |
| 1746492064 | 1947 | 1947 | This Time for Keeps                   | This Time for Keeps                   | Thorpe, Richard                  | Richard Thorpe                      | tt0039898 |
| 1746580745 | 1937 | 1937 | It Happened in Hollywood              | It Happened in Hollywood              | Lachman, Harry                   | Harry Lachman                       | tt0029056 |
| 1746504190 | 1918 | 1918 | Uneasy Money                          | Uneasy Money                          | Windom, Lawrence C.              | Lawrence C. Windom                  | tt0008718 |
| 1746485538 | 1918 | 1918 | All the World to Nothing              | All the World to Nothing              | King, Henry                      | Henry King                          | tt0008824 |
| 1746577844 | 1937 | 1937 | Living on Love                        | Living on Love                        | Landers, Lew                     | Lew Landers                         | tt0029158 |
| 1746514964 | 1916 | 1916 | Let Katie Do It                       | Let Katie Do It                       | Franklin, C. M.; Franklin, S. A. | Chester M. Franklin                 | tt0005613 |
| 1746553698 | 1964 | 1963 | Naked Complex                         | Naked Complex                         | Mart, Roy                        | Ron Mart                            | tt0057351 |
| 1746502671 | 1915 | 1915 | The Lost House                        | The Lost House                        | Cabanne, William Christy         | Christy Cabanne                     | tt0005650 |
| 1746492577 | 1948 | 1948 | I Love Trouble                        | I Love Trouble                        | Simon, S. Sylvan                 | S. Sylvan Simon                     | tt0040457 |
| 1746574580 | 1933 | 1933 | Lucky Dog                             | Lucky Dog                             | Myers, Z.                        | Zion Myers                          | tt0024277 |
| 1746198512 | 1966 | 1966 | Flame and the Fire                    | Flame and the Fire                    | Gaisseau, Pierre Dominique       | Pierre                              | tt7806900 |
| 1746582592 | 1935 | 1935 | Fighting Coward                       | The Fighting Coward                   | Milner, Dan                      | Dan Milner                          | tt0027867 |
| 1746421262 | 1994 | 1994 | The Little Rascals                    | The Little Rascals                    | Spheeris, Penelope               | Penelope Spheeris                   | tt0110366 |
| 1769971985 | 1969 | 1969 | AC/DC                                 | AC/DC                                 | Winters, Larry                   | Larry Winters                       | tt0209872 |
| 1746562351 | 1953 | 1953 | Marshal of Cedar Rock                 | Marshal of Cedar Rock                 | Keller, Harry                    | Harry Keller                        | tt0046049 |
| 1746508700 | 1926 | 1926 | The Merry Cavalier                    | The Merry Cavalier                    | Mason, Noel                      | Noel M. Smith                       | tt0137949 |
| 1746454500 | 1946 | 1946 | Stars Over Texas                      | Stars Over Texas                      | Tansey, Robert Emmett            | Robert Emmett Tansey                | tt0038981 |
| 1769970754 | 1912 | 1912 | The Insurgent Senator                 | The Insurgent Senator                 |                                  | Bannister Merwin                    | tt0002279 |
| 1746524628 | 1915 | 1915 | The Alien                             | The Alien                             |                                  | Reginald Barker                     | tt0004874 |
| 1746520362 | 1925 | 1925 | The Limited Mail                      | The Limited Mail                      | Ince, Thomas H.                  | George W. Hill                      | tt0016025 |
| 1746555481 | 1955 | 1955 | Seven Angry Men                       | Seven Angry Men                       | Hill, George                     | Charles Marquis Warren              | tt0048602 |
| 1746577781 | 1936 | 1936 | The Boss Rider of Gun Creek           | The Boss Rider of Gun Creek           | Warren, Charles Marquis          | Lesley Selander                     | tt0027389 |
| 1746507588 | 1926 | 1926 | The Fighting Boob                     | The Fighting Boob                     | Selander, Lesley                 | Jack Nelson                         | tt0016856 |
| 1746514222 | 1923 | 1923 | Mine To Keep                          | Mine to Keep                          | Nelson, Jack                     | Ben F. Wilson                       | tt0014281 |
| 1746514694 | 1923 | 1923 | Big Brother                           | Big Brother                           | Wilson, Ben                      | Allan Dwan                          | tt0013870 |
|            |      |      |                                       |                                       | Dwan, Allan                      |                                     |           |

|            |      |      |                                                |                                           |                                     |                       |            |
|------------|------|------|------------------------------------------------|-------------------------------------------|-------------------------------------|-----------------------|------------|
| 1746491757 | 1948 | 1948 | Reaching from Heaven                           | Reaching from Heaven                      | Strayer, Frank                      | Frank R. Strayer      | tt0046229  |
| 1746434658 | 1996 | 1996 | The Evening Star                               | The Evening Star                          | Harling, Robert                     | Robert Harling        | tt0116240  |
| 1746515845 | 1921 | 1921 | Shadows of Conscience                          | Shadows of Conscience                     | McCarthy, John P.                   | John P. McCarthy      | tt0012670  |
| 1746562171 | 1954 | 1954 | Her Twelve Men                                 | Her Twelve Men                            | Leonard, Robert Z.                  | Robert Z. Leonard     | tt0047076  |
| 1746408494 | 1985 | 1985 | Vision Quest                                   | Vision Quest                              | Becker, Harold                      | Harold Becker         | tt0090270  |
| 1746474838 | 1947 | 1946 | 13 Rue Madeleine                               | 13 Rue Madeleine                          | Hathaway, Henry                     | Henry Hathaway        | tt0038279  |
| 1746435378 | 1999 | 1998 | Where's Marlowe?                               | Where's Marlowe?                          | Pyne, Daniel                        | Daniel Pyne           | tt0118150  |
| 1746583649 | 1931 | 1931 | Bought                                         | Bought!                                   | Mayo, Archie                        | Archie Mayo           | tt0021691  |
| 1746579041 | 1961 | 1961 | Force of Impulse                               | Force of Impulse                          | Swimmer, Saul                       | Saul Swimmer          | tt0132974  |
| 1746500658 | 1926 | 1926 | Shadow Ranger                                  | Shadow Ranger                             |                                     |                       | tt0339655  |
| 1746475280 | 1945 | 1945 | Rhythm Round-up                                | Rhythm Round Up                           |                                     |                       | tt0038027  |
| 1746394011 | 1986 | 1986 | Cobra                                          | Cobra                                     | Keays, Vernon                       | Vernon Keays          | tt0090859  |
| 1746563878 | 1953 | 1952 | Ruby Gentry                                    | Ruby Gentry                               | Cosmatos, George P.                 | George P. Cosmatos    | tt0045109  |
| 1746583986 | 1939 | 1939 | The Arizona Wildcat                            | The Arizona Wildcat                       | Vidor, King                         | King Vidor            | tt0029878  |
| 1746500027 | 1948 | 1948 | Sealed Verdict                                 | Sealed Verdict                            | Leeds, Herbert I.                   | Herbert I. Leeds      | tt0040764  |
| 1746570581 | 1952 | 1952 | Deadline--U.S.A.                               | Deadline U.S.A.                           | Allen, Lewis                        | Lewis Allen           | tt0044533  |
| 1746251242 | 1975 | 1975 | The Adventure of Sherlock Holmes' Smarter Brot | The Adventure of Sherlock Holmes' Smarter | Brooks, Richard                     | Richard Brooks        | tt0072608  |
| 1746473700 | 1946 | 1946 | Up Goes Maisie                                 | Up Goes Maisie                            | Wilder, Gene                        | Gene Wilder           | tt0039073  |
| 1746520497 | 1925 | 1925 | The Wedding Song                               | The Wedding Song                          | Beaumont, Harry                     | Harry Beaumont        | tt0016509  |
| 1746514808 | 1927 | 1927 | The Fortune Hunter                             | The Fortune Hunter                        | Hale, Alan                          | Alan Hale             | tt0017903  |
| 1746577244 | 1959 | 1959 | No Name on the Bullet                          | No Name on the Bullet                     | Reisner, Charles F.                 | Charles Reisner       | tt0052002  |
| 1746577977 | 1939 | 1939 | King of the Underworld                         | King of the Underworld                    | Arnold, Jack                        | Jack Arnold           | tt0031536  |
| 1746496081 | 1919 | 1919 | Three Black Eyes                               | Three Black Eyes                          | Seiler, Lewis                       | Lewis Seiler          | tt0194448  |
| 1746453640 | 1941 | 1941 | Down in San Diego                              | Down in San Diego                         | Horan, Charles                      | Charles Horan         | tt0033551  |
| 1746582800 | 1935 | 1935 | Vanessa: Her Love Story                        | Vanessa, Her Love Story                   | Sinclair, Robert B.                 | Robert B. Sinclair    | tt0027166  |
| 1746434337 | 1990 | 1990 | RoboCop 2                                      | RoboCop 2                                 | Howard, William K.                  | William K. Howard     | tt0100502  |
| 1746583152 | 1935 | 1935 | Times Square Lady                              | Times Square Lady                         | Kershner, Irvin                     | Irvin Kershner        | tt0027110  |
| 1746562010 | 1953 | 1953 | Northern Patrol                                | Northern Patrol                           | Seitz, George B.                    | George B. Seitz       | tt00251905 |
| 1746574522 | 1933 | 1933 | If I Were Free                                 | If I Were Free                            | Bailey, Rex                         | Rex Bailey            | tt0024170  |
| 1746487300 | 1918 | 1918 | Headin' South                                  | Headin' South                             | Nugent, Elliott                     | Elliott Nugent        | tt0009143  |
| 1746509172 | 1950 | 1950 | Ambush                                         | Ambush                                    | Rosson, Arthur                      | Allan Dwan            | tt0041117  |
| 1746580756 | 1938 | 1938 | Flight into Nowhere                            | Flight into Nowhere                       | Wood, Sam                           | Sam Wood              | tt0030140  |
| 1746578002 | 1938 | 1938 | Panamint's Bad Man                             | Panamint's Bad Man                        | Collins, Lewis D.                   | Lewis D. Collins      | tt0030551  |
| 1746565951 | 1955 | 1955 | Tarantula                                      | Tarantula                                 | Taylor, Rex                         | Ray Taylor            | tt0048696  |
| 1746577174 | 1951 | 1951 | Night into Morning                             | Night into Morning                        | Arnold, Jack                        | Jack Arnold           | tt0043852  |
| 1746567967 | 1932 | 1932 | Hat Check Girl                                 | Hat Check Girl                            | Markle, Fletcher; Beaudine, William | Fletcher Markle       | tt0022978  |
| 1746466644 | 1917 | 1917 | A Bit of Kindling                              | A Bit of Kindling                         | Lanfield, Sidney                    | Sidney Lanfield       | tt0168514  |
| 1746422145 | 1997 | 1997 | The Peacemaker                                 | The Peacemaker                            | MacDonald, Sherwood                 | Sherwood MacDonald    | tt0119874  |
| 1746524728 | 1915 | 1915 | The Heart of the Blue Ridge                    | The Heart of the Blue Ridge               | Leder, Mimi                         | Mimi Leder            | tt0005452  |
| 1746524449 | 1914 | 1914 | The Woman in Black                             | The Woman in Black                        | Young, James                        | James Young           | tt0261417  |
| 1746524040 | 1917 | 1917 | The Clodhopper                                 | The Clodhopper                            | Marston, Lawrence                   | Maurice Costello      | tt0168593  |
| 1745342502 | 2001 | 2000 | Happy Accidents                                | Happy Accidents                           | Schertzinger, Victor L.             | Victor Schertzinger   | tt0208196  |
| 1746496056 | 1920 | 1920 | The County Fair                                | The County Fair                           | Anderson, Brad                      | Brad Anderson         | tt0011076  |
| 1746504386 | 1918 | 1918 | The Mysterious Mr. Browning                    | The Mysterious Mr. Browning               | Tourneur, Maurice                   | Edmund Mortimer       | tt0187328  |
| 1746408436 | 1988 | 1988 | Frantic                                        | Frantic                                   |                                     | Sidney M. Goldin      | tt0095174  |
| 1746569693 | 1957 | 1956 | The Women of Pitcairn Island                   | The Women of Pitcairn Island              | Polanski, Roman                     | Roman Polanski        | tt0049963  |
| 1746584294 | 1935 | 1935 | In Caliente                                    | In Caliente                               | Yarbrough, Jean                     | Jean Yarbrough        | tt0026523  |
| 1769969490 | 1965 | 1965 | The Soul Snatcher                              | The Soul Snatcher                         | Bacon, Lloyd                        | Lloyd Bacon           | tt0216225  |
| 1746571090 | 1934 | 1934 | The Lemon Drop Kid                             | The Lemon Drop Kid                        | Zimmer, H. L.                       | H.L. Zimmer           | tt0025378  |
| 1746550190 | 1955 | 1955 | The Girl Rush                                  | The Girl Rush                             | Neilan, Marshall                    | Marshall Neilan       | tt0048118  |
| 1746409243 | 1989 | 1989 | An Innocent Man                                | An Innocent Man                           | Pirosh, Robert                      | Robert Pirosh         | tt0097579  |
| 1746578533 | 1959 | 1959 | 4D Man                                         | 4D Man                                    | Yates, Peter                        | Peter Yates           | tt0052530  |
| 1746524131 | 1914 | 1914 | The Brute                                      | The Brute                                 | Yeaworth, Irvin S.                  | Irvin S. Yeaworth Jr. | tt0003720  |
| 1746454791 | 1995 | 1995 | Separate Lives                                 | Separate Lives                            | Heffron, Thomas N.                  | Thomas N. Heffron     | tt0111125  |
| 1746438732 | 1999 | 1999 | Smoke and Mirrors: A History of Denial         | Smoke and Mirrors: A History of Denial    | Madden, David                       | David Madden          | tt0230796  |
| 1746455590 | 1998 | 1998 | Soldier                                        | Soldier                                   | Rosenzweig, Torrie                  | Torrie Rosenzweig     | tt0120157  |
| 1746513617 | 1915 | 1915 | Destiny; or, the Soul of a Woman               | Destiny; Or, The Soul of a Woman          | Anderson, Paul                      | Paul W.S. Anderson    | tt0005188  |
|            |      |      |                                                |                                           | Carewe, Edwin                       | Edwin Carewe          |            |

|            |      |      |                               |                               |                        |                       |           |
|------------|------|------|-------------------------------|-------------------------------|------------------------|-----------------------|-----------|
| 1746465400 | 1945 | 1945 | The House of Fear             | The House of Fear             | Neill, Roy William     | Roy William Neill     | tt0037794 |
| 1746524911 | 1914 | 1914 | The Spirit of the Poppy       | The Spirit of the Poppy       | Thomson, Frederick     | Frederick A. Thomson  | tt0004627 |
| 1746436554 | 1940 | 1940 | Rocky Mountain Rangers        | Rocky Mountain Rangers        | Sherman, George        | George Sherman        | tt0032996 |
| 1746577226 | 1958 | 1957 | Seven Hills of Rome           | Seven Hills of Rome           | Rowland, Roy           | Roy Rowland           | tt0050140 |
| 1746582035 | 1929 | 1929 | The Marriage Playground       | The Marriage Playground       | Mendes, Lothar         | Lothar Mendes         | tt0020146 |
| 1746567108 | 1934 | 1934 | Bachelor of Arts              | Bachelor of Arts              | King, Louis            | Louis King            | tt0024856 |
| 1746497544 | 1918 | 1918 | Broadway Love                 | Broadway Love                 | Park, Ida May          | Ida May Park          | tt0008930 |
| 1746454471 | 1943 | 1943 | Sherlock Holmes in Washington | Sherlock Holmes in Washington | Neill, Roy William     | Roy William Neill     | tt0036349 |
| 1746584000 | 1937 | 1937 | Behind the Headlines          | Behind the Headlines          | Rosson, Richard        | Richard Rosson        | tt0028618 |
| 1746582880 | 1936 | 1935 | The Pecos Kid                 | The Pecos Kid                 | Fraser, Harry          | Harry L. Fraser       | tt0026857 |
| 1746574093 | 1962 | 1962 | The Interns                   | The Interns                   | Swift, David           | David Swift           | tt0056101 |
| 1746439409 | 1944 | 1944 | Tomorrow, the World!          | Tomorrow, the World!          | Fenton, Leslie         | Leslie Fenton         | tt0037386 |
| 1746560568 | 1965 | 1965 | Arizona Raiders               | Arizona Raiders               | Witney, William        | William Witney        | tt0058917 |
| 1746410555 | 1984 | 1984 | A Nightmare on Elm Street     | A Nightmare on Elm Street     | Craven, Wes            | Wes Craven            | tt0087800 |
| 1746532823 | 1916 | 1916 | The Right Direction           | The Right Direction           | Hopper, E. Mason       | E. Mason Hopper       | tt0158898 |
| 1746464805 | 1946 | 1946 | Two Sisters from Boston       | Two Sisters from Boston       | Koster, Henry          | Henry Koster          | tt0039054 |
| 1746584680 | 1929 | 1929 | Two Men and a Maid            | Two Men and a Maid            | Archainbaud, George    | George Archainbaud    | tt0020525 |
| 1746455058 | 1996 | 1996 | First Kid                     | First Kid                     | Evans, David Mickey    | David Mickey Evans    | tt0116311 |
| 1745293748 | 2006 | 2005 | V for Vendetta                | V for Vendetta                | McTeigue, James        | James McTeigue        | tt0434409 |
| 1746577015 | 1960 | 1960 | Beyond the Time Barrier       | Beyond the Time Barrier       | Ulmer, Edgar G.        | Edgar G. Ulmer        | tt0053651 |
| 1746585037 | 1939 | 1939 | Code of the Streets           | Code of the Streets           | Young, Harold          | Harold Young          | tt0031167 |
| 1746523547 | 1916 | 1916 | The Ocean Waif                | The Ocean Waif                | Blaché, Alice          | Alice Guy             | tt0004413 |
| 1746581795 | 1950 | 1950 | Panic in the Streets          | Panic in the Streets          | Kazan, Elia            | Elia Kazan            | tt0042832 |
| 1746524971 | 1915 | 1915 | The Bigger Man                | The Bigger Man                | Noble, John W.         | John W. Noble         | tt0004965 |
| 1746560484 | 1932 | 1932 | Trailing the Killer           | Trailing the Killer           | Raymaker, Herman C.    | Herman C. Raymaker    | tt0023616 |
| 1746217917 | 1965 | 1965 | King Rat                      | King Rat                      | Forbes, Bryan          | Bryan Forbes          | tt0059358 |
| 1746524614 | 1927 | 1927 | The Climbers                  | The Climbers                  | Stein, Paul L.         | Paul L. Stein         | tt0017758 |
| 1746513784 | 1922 | 1922 | Fools of Fortune              | Fools of Fortune              | Chaudet, Louis         | Louis Chaudet         | tt0013142 |
| 1746582913 | 1935 | 1935 | Paris in Spring               | Paris in Spring               | Milestone, Lewis       | Lewis Milestone       | tt0026849 |
| 1746514442 | 1915 | 1915 | The Commuters                 | The Commuters                 | Fitzmaurice, George    | George Fitzmaurice    | tt0005127 |
| 1746492733 | 1948 | 1948 | Range Renegades               | Range Renegades               | Hillyer, Lambert       | Lambert Hillyer       | tt0163174 |
| 1746235419 | 1972 | 1971 | Straw Dogs                    | Straw Dogs                    | Peckinpah, Sam         | Sam Peckinpah         | tt0067800 |
| 1746422215 | 1996 | 1996 | Broken Arrow                  | Broken Arrow                  | Woo, John              | John Woo              | tt0115759 |
| 1746203383 | 1970 | 1970 | Cotton Comes to Harlem        | Cotton Comes to Harlem        | Davis, Ossie           | Ossie Davis           | tt0065579 |
| 1746464925 | 1947 | 1947 | The Unfaithful                | The Unfaithful                | Sherman, Vincent       | Vincent Sherman       | tt0039937 |
| 1746578491 | 1961 | 1961 | V. D.                         | V.D.                          | Chace, Haile           | H. Haile Chace        | tt0055580 |
| 1746208868 | 1968 | 1968 | The Ghastly Ones              | The Ghastly Ones              | Milligan, Andy         | Andy Milligan         | tt0064369 |
| 1746569974 | 1962 | 1962 | My Geisha                     | My Geisha                     | Cardiff, Jack          | Jack Cardiff          | tt0056267 |
| 1746567752 | 1932 | 1932 | Destry Rides Again            | Destry Rides Again            | Stoloff, Ben           | Benjamin Stoloff      | tt0022810 |
| 1746524504 | 1916 | 1916 | Fruits of Desire              | Fruits of Desire              | Eagle, Oscar           | Oscar Eagle           | tt0157672 |
| 1746503550 | 1918 | 1918 | Zongar                        | Zongar                        | Macfadden, Bernarr     | Bernarr Macfadden     | tt0009849 |
| 1746566244 | 1954 | 1954 | The Golden Idol               | The Golden Idol               | Beebe, Ford            | Ford Beebe            | tt0047036 |
| 1746491955 | 1946 | 1946 | Song of Arizona               | Song of Arizona               | McDonald, Frank        | Frank McDonald        | tt0038968 |
| 1746569665 | 1954 | 1954 | 20,000 Leagues Under the Sea  | 20,000 Leagues Under the Sea  | Fleischer, Richard     | Richard Fleischer     | tt0046672 |
| 1746487477 | 1919 | 1919 | A Fugitive from Matrimony     | A Fugitive from Matrimony     | King, Henry            | Henry King            | tt0010150 |
| 1746421302 | 1992 | 1992 | Memoirs of an Invisible Man   | Memoirs of an Invisible Man   | Carpenter, John        | John Carpenter        | tt0104850 |
| 1746584768 | 1929 | 1929 | On With the Show              | On with the Show!             | Crosland, Alan         | Alan Crosland         | tt0020238 |
| 1746573943 | 1957 | 1957 | I Was a Teenage Frankenstein  | I Was a Teenage Frankenstein  | Strock, Herbert L.     | Herbert L. Strock     | tt0050531 |
| 1746438221 | 1943 | 1943 | Get Going                     | Get Going                     | Yarbrough, Jean        | Jean Yarbrough        | tt0035935 |
| 1746577410 | 1962 | 1962 | Girls! Girls! Girls!          | Girls! Girls! Girls!          | Taurog, Norman         | Norman Taurog         | tt0056023 |
| 1746580613 | 1938 | 1938 | Swing It, Sailor!             | Swing It, Sailor!             | Cannon, Raymond        | Raymond Cannon        | tt0029627 |
| 1746520562 | 1927 | 1927 | Tongues of Scandal            | Tongues of Scandal            | Clements, Roy          | Roy Clements          | tt0018493 |
| 1746465415 | 1941 | 1941 | Sing Another Chorus           | Sing Another Chorus           | Lamont, Charles        | Charles Lamont        | tt0034190 |
| 1746583091 | 1940 | 1940 | Mexican Spitfire Out West     | Mexican Spitfire Out West     | Goodwins, Leslie       | Leslie Goodwins       | tt0032786 |
| 1746184853 | 1965 | 1965 | The War Lord                  | The War Lord                  | Schaffner, Franklin J. | Franklin J. Schaffner | tt0059896 |
| 1746485220 | 1917 | 1917 | A Kentucky Cinderella         | A Kentucky Cinderella         | Julian, Rupert         | Rupert Julian         | tt0008157 |
| 1746581212 | 1961 | 1962 | Wild Harvest                  | Wild Harvest                  | Baerwitz, Jerry A.     | Jerry A. Baerwitz     | tt0199141 |

|            |      |      |                                      |                                      |                                   |                         |           |
|------------|------|------|--------------------------------------|--------------------------------------|-----------------------------------|-------------------------|-----------|
| 1746409224 | 1989 | 1989 | Lost Angels                          | Lost Angels                          | Hudson, Hugh                      | Hugh Hudson             | tt0097782 |
| 1746582326 | 1931 | 1931 | Stolen Heaven                        | Stolen Heaven                        | Abbott, George                    | George Abbott           | tt0022433 |
| 1746583186 | 1930 | 1931 | Damaged Love                         | Damaged Love                         | Willat, Irvin                     | Irvin Willat            | tt0021777 |
| 1746577803 | 1937 | 1937 | The Old Wyoming Trail                | The Old Wyoming Trail                | Blangsted, Folmer                 | Folmar Blangsted        | tt0029341 |
| 1746503837 | 1921 | 1921 | Bunty Pulls the Strings              | Bunty Pulls the Strings              | Barker, Reginald                  | Reginald Barker         | tt0012014 |
| 1746465306 | 1945 | 1945 | Scared Stiff                         | Scared Stiff                         | McDonald, Frank                   | Frank McDonald          | tt0038055 |
| 1745315539 | 2011 | 2010 | Beware the Gonzo                     | Beware the Gonzo                     | Goluboff, Bryan                   | Bryan Goluboff          | tt1412442 |
| 1746524987 | 1914 | 1914 | Cinderella                           | Cinderella                           | Kirkwood, James                   | James Kirkwood          | tt0003772 |
| 1746184780 | 1965 | 1965 | Baby the Rain Must Fall              | Baby the Rain Must Fall              | Mulligan, Robert                  | Robert Mulligan         | tt0058930 |
| 1746578436 | 1958 | 1958 | The Young Lions                      | The Young Lions                      | Dmytryk, Edward                   | Edward Dmytryk          | tt0052415 |
| 1746233988 | 1966 | 1966 | Grand Prix                           | Grand Prix                           | Frankenheimer, John               | John Frankenheimer      | tt0060472 |
| 1746555315 | 1956 | 1956 | Outside the Law                      | Outside the Law                      | Arnold, Jack                      | Jack Arnold             | tt0049586 |
| 1746578012 | 1936 | 1936 | The Leathernecks Have Landed         | The Leathernecks Have Landed         | Bretherton, Howard                | Howard Bretherton       | tt0027877 |
| 1746500194 | 1946 | 1946 | The Notorious Lone Wolf              | The Notorious Lone Wolf              | Lederman, D. Ross                 | D. Ross Lederman        | tt0038788 |
| 1746565466 | 1952 | 1952 | Bugles in the Afternoon              | Bugles in the Afternoon              | Rowland, Roy                      | Roy Rowland             | tt0044456 |
| 1746545227 | 1940 | 1940 | Bullet Code                          | Bullet Code                          | Howard, David                     | David Howard            | tt0032292 |
| 1746582175 | 1950 | 1950 | Spy Hunt                             | Spy Hunt                             | Sherman, George                   | George Sherman          | tt0042991 |
| 1746501078 | 1916 | 1916 | The Matrimonial Martyr               | The Matrimonial Martyr               | MacDonald, Sherwood               | Sherwood MacDonald      | tt0163096 |
| 1746582191 | 1928 | 1928 | Inspiration                          | Inspiration                          | McEveety, Bernard                 | Bernard McEveety        | tt0020027 |
| 1746530807 | 1950 | 1950 | I Shot Billy the Kid                 | I Shot Billy the Kid                 | Berke, William                    | William Berke           | tt0042587 |
| 1746515767 | 1922 | 1922 | Shadows                              | Shadows                              | Forman, Tom                       | Tom Forman              | tt0013592 |
| 1746524459 | 1915 | 1915 | The Lure of the Mask                 | The Lure of the Mask                 | Ricketts, Thomas                  | Tom Ricketts            | tt0005667 |
| 1746574588 | 1933 | 1933 | Lady Killer                          | Lady Killer                          | Del Ruth, Roy                     | Roy Del Ruth            | tt0024239 |
| 1745272513 | 2000 | 2000 | The Whole Nine Yards                 | The Whole Nine Yards                 | Lynn, Jonathan                    | Jonathan Lynn           | tt0190138 |
| 1746465147 | 1944 | 1944 | One Mysterious Night                 | One Mysterious Night                 | Boetticher, Oscar                 | Budd Boetticher         | tt0037153 |
| 1746423480 | 1999 | 1998 | Goodbye Lover                        | Goodbye Lover                        | Joffé, Roland                     | Roland Joffé            | tt0119219 |
| 1746532436 | 1927 | 1927 | Compassion                           | Compassion                           | Adamson, Victor; MacGregor, Norva | Victor Adamson          | tt0017770 |
| 1746542671 | 1926 | 1926 | Morganson's Finish                   | Morganson's Finish                   | Windemere, Fred                   | Fred Windemere          | tt0017171 |
| 1746523952 | 1923 | 1923 | Railroaded                           | Railroaded                           | Mortimer, Edmund                  | Edmund Mortimer         | tt0014393 |
| 1746584931 | 1939 | 1939 | They Asked for It                    | They Asked for It                    | McDonald, Frank                   | Frank McDonald          | tt0032020 |
| 1746208349 | 1966 | 1967 | The Hostage                          | The Hostage                          | Doughten, Russell S.              | Russell S. Doughten Jr. | tt0061782 |
| 1746499845 | 1946 | 1946 | The Gentleman from Texas             | The Gentleman from Texas             | Hillyer, Lambert                  | Lambert Hillyer         | tt0038555 |
| 1746580525 | 1937 | 1937 | Trouble at Midnight                  | Trouble at Midnight                  | Beebe, Ford                       | Ford Beebe              | tt0030898 |
| 1746422217 | 1998 | 1998 | Blues Brothers 2000                  | Blues Brothers 2000                  | Landis, John                      | John Landis             | tt0118747 |
| 1746569528 | 1958 | 1958 | The Gift of Love                     | The Gift of Love                     | Negulesco, Jean                   | Jean Negulesco          | tt0051657 |
| 1746497033 | 1919 | 1919 | The Imp                              | The Imp                              | Ellis, Robert                     | Robert Ellis            | tt0190475 |
| 1746523960 | 1917 | 1917 | Double Room Mystery                  | The Double Room Mystery              | Henley, Hobart                    | Hobart Henley           | tt0007871 |
| 1746584153 | 1936 | 1936 | Murder by an Aristocrat              | Murder by an Aristocrat              | McDonald, Frank                   | Frank McDonald          | tt0028001 |
| 1746581335 | 1962 | 1962 | Escape from East Berlin              | Escape from East Berlin              | Siodmak, Robert                   | Robert Siodmak          | tt0055962 |
| 1746583482 | 1929 | 1929 | The Mysterious Island                | The Mysterious Island                | Hubbard, Lucien                   | Lucien Hubbard          | tt0020198 |
| 1746583525 | 1928 | 1928 | Buck Privates                        | Buck Privates                        | Brown, Melville                   | Melville W. Brown       | tt0018729 |
| 1746570600 | 1952 | 1952 | Caribbean                            | Caribbean                            | Ludwig, Edward                    | Edward Ludwig           | tt0044481 |
| 1746234520 | 1967 | 1967 | Reflections in a Golden Eye          | Reflections in a Golden Eye          | Huston, John                      | John Huston             | tt0062185 |
| 1746534805 | 1922 | 1922 | Tillie                               | Tillie                               | Urson, Frank                      | Frank Urson             | tt0013679 |
| 1746516307 | 1920 | 1920 | The Restless Sex                     | The Restless Sex                     | Leonard, Robert Z.                | Leon D'Usseau           | tt0011623 |
| 1746524003 | 1927 | 1927 | Hills of Kentucky                    | Hills of Kentucky                    | Bretherton, Howard                | Howard Bretherton       | tt0017995 |
| 1745342321 | 2008 | 2008 | Bigger, Stronger, Faster             | Bigger Stronger Faster*              | Bell, Christopher                 | Chris Bell              | tt1151309 |
| 1746251490 | 1977 | 1977 | The Private Files of J. Edgar Hoover | The Private Files of J. Edgar Hoover | Cohen, Larry                      | Larry Cohen             | tt0076567 |
| 1746508215 | 1923 | 1923 | Growing Better                       | Growing Better                       |                                   | Horace B. Carpenter     | tt0361677 |
| 1746473766 | 1944 | 1944 | The Bridge of San Luis Rey           | The Bridge of San Luis Rey           | Lee, Rowland V.                   | Rowland V. Lee          | tt0036672 |
| 1746438944 | 1945 | 1944 | National Velvet                      | National Velvet                      | Brown, Clarence                   | Clarence Brown          | tt0037120 |
| 1746577950 | 1935 | 1935 | Trigger Tom                          | Trigger Tom                          | Samuels, Henri                    | Harry S. Webb           | tt0028412 |
| 1746581428 | 1910 | 1910 | Jeffries on His Ranch                | Jeffries on His Ranch                |                                   |                         | tt2287218 |
| 1746564825 | 1953 | 1953 | Call Me Madam                        | Call Me Madam                        | Lang, Walter                      | Walter Lang             | tt0045592 |
| 1746572166 | 1932 | 1932 | The Dark Horse                       | The Dark Horse                       | Green, Alfred E.                  | Alfred E. Green         | tt0022802 |
| 1746573928 | 1956 | 1956 | The Searchers                        | The Searchers                        | Ford, John                        | John Ford               | tt0049730 |
| 1745342301 | 2008 | 2008 | The Eye                              | The Eye                              | Moreau, David ; Palud, Xavier     | David Moreau            | tt0406759 |

|            |      |      |                                         |                                         |                         |                        |           |
|------------|------|------|-----------------------------------------|-----------------------------------------|-------------------------|------------------------|-----------|
| 1746569500 | 1953 | 1953 | Phantom from Space                      | Phantom from Space                      | Wilder, W. Lee          | W. Lee Wilder          | tt0046186 |
| 1746524782 | 1928 | 1928 | The Noose                               | The Noose                               | Dillon, John Francis    | John Francis Dillon    | tt0019217 |
| 1746502344 | 1923 | 1923 | The Law of the Lawless                  | Law of the Lawless                      | Fleming, Victor         | Victor Fleming         | tt0014189 |
| 1746502407 | 1915 | 1915 | The High Hand                           | The High Hand                           | Taylor, William D.      | William Desmond Taylor | tt0005483 |
| 1746515840 | 1922 | 1922 | Trouble                                 | Trouble                                 | Austin, Albert          | Albert Austin          | tt0013713 |
| 1746584353 | 1937 | 1937 | Hideaway                                | Hideaway                                | Rosson, Richard         | Richard Rosson         | tt0028997 |
| 1746581320 | 1950 | 1950 | The Petty Girl                          | The Petty Girl                          | Levin, Henry            | Henry Levin            | tt0042844 |
| 1769971946 | 1969 | 1969 | Campus Heat                             | Campus Heat                             | Rich, Tom               | Tom Rich               | tt0212026 |
| 1746584437 | 1931 | 1931 | Galloping Thru                          | Galloping Thru                          | Nosler, Lloyd           | Lloyd Nosler           | tt0021896 |
| 1746435924 | 1996 | 1996 | City Hall                               | City Hall                               | Becker, Harold          | Harold Becker          | tt0115907 |
| 1746564500 | 1952 | 1951 | The Lady Says No                        | The Lady Says No                        | Ross, Frank             | Frank Ross             | tt0043721 |
| 1746487058 | 1919 | 1919 | The Price of Innocence                  | The Price of Innocence                  | Kirby, Frank Gordon     | Frank Kugler           | tt0192471 |
| 1746515091 | 1922 | 1922 | Cross Roads                             | Cross Roads                             |                         | Francis Ford           | tt0013037 |
| 1746235469 | 1971 | 1971 | Fiddler on the Roof                     | Fiddler on the Roof                     | Jewison, Norman         | Norman Jewison         | tt0067093 |
| 1746584091 | 1938 | 1938 | Meet the Girls                          | Meet the Girls                          | Forde, Eugene           | Eugene Forde           | tt0030430 |
| 1746579044 | 1950 | 1950 | Two Weeks with Love                     | Two Weeks with Love                     | Rowland, Roy            | Roy Rowland            | tt0043081 |
| 1746502145 | 1910 | 1910 | The Return of Ta-Wa-Wa                  | Return of Ta Wa Wa                      |                         | William F. Haddock     | tt0822850 |
| 1746435835 | 1999 | 1999 | Superstar                               | Superstar                               | McCulloch, Bruce        | Bruce McCulloch        | tt0167427 |
| 1746508541 | 1925 | 1925 | Friendly Enemies                        | Friendly Enemies                        | Melford, George         | George Melford         | tt0015843 |
| 1746524976 | 1916 | 1916 | The Race                                | The Race                                | Melford, George H.      | George Melford         | tt0007239 |
| 1746571369 | 1952 | 1952 | Sally and Saint Anne                    | Sally and Saint Anne                    | Maté, Rudolph           | Rudolph Maté           | tt0045115 |
| 1746582340 | 1928 | 1928 | A Woman of Affairs                      | A Woman of Affairs                      | Brown, Clarence         | Clarence Brown         | tt0019591 |
| 1746515045 | 1915 | 1915 | Thou Shalt Not Kill                     | Thou Shalt Not Kill                     | Reid, Hal               | Hal Reid               | tt0145524 |
| 1746496074 | 1919 | 1919 | The Homebreaker                         | The Homebreaker                         | Schertzinger, Victor L. | Victor Schertzinger    | tt0010264 |
| 1746574998 | 1937 | 1937 | History Is Made at Night                | History Is Made at Night                | Borzage, Frank          | Frank Borzage          | tt0029002 |
| 1746577851 | 1938 | 1938 | Scandal Street                          | Scandal Street                          | Hogan, James            | James P. Hogan         | tt0030719 |
| 1769972670 | 1963 | 1963 | Flaming Creatures                       | Flaming Creatures                       | Smith, Jack             | Jack Smith             | tt0054880 |
| 1746410522 | 1987 | 1987 | Critical Condition                      | Critical Condition                      | Apted, Michael          | Michael Apted          | tt0092798 |
| 1746561806 | 1954 | 1954 | Jesse James vs. the Daltons             | Jesse James vs. the Daltons             | Castle, William         | William Castle         | tt0047129 |
| 1746438298 | 1942 | 1941 | Ball of Fire                            | Ball of Fire                            | Hawks, Howard           | Howard Hawks           | tt0033373 |
| 1746422613 | 1995 | 1995 | Waterworld                              | Waterworld                              | Reynolds, Kevin         | Kevin Reynolds         | tt0114898 |
| 1746208162 | 1969 | 1969 | Sod Sisters                             | Sod Sisters                             | Williams, Lester        | Lester Williams        | tt0339703 |
| 1746520938 | 1948 | 1948 | Under California Stars                  | Under California Stars                  | Witney, William         | William Witney         | tt0040915 |
| 1746503664 | 1918 | 1918 | Wives of Men                            | Wives of Men                            | Stahl, John M.          | John M. Stahl          | tt0009824 |
| 1746570365 | 1933 | 1933 | A Man of Sentiment                      | A Man of Sentiment                      | Thorpe, Richard         | Richard Thorpe         | tt0024300 |
| 1746584669 | 1929 | 1929 | The Lone Horseman                       | The Lone Horseman                       | McGowan, J. P.          | J.P. McGowan           | tt0020105 |
| 1746561384 | 1965 | 1965 | Girl Happy                              | Girl Happy                              | Sagal, Boris            | Boris Sagal            | tt0059224 |
| 1746583342 | 1928 | 1928 | Beware of Blondes                       | Beware of Blondes                       | Seitz, George B.        | George B. Seitz        | tt0018692 |
| 1745340149 | 2002 | 2002 | The Lord of the Rings: The Two Towers   | The Lord of the Rings: The Two Towers   | Jackson, Peter          | Peter Jackson          | tt0167261 |
| 1746532750 | 1915 | 1915 | A Yankee from the West                  | A Yankee from the West                  | Siegmann, George        | George Siegmann        | tt0006320 |
| 1746563809 | 1952 | 1952 | Affair in Trinidad                      | Affair in Trinidad                      | Sherman, Vincent        | Vincent Sherman        | tt0044331 |
| 1746569873 | 1957 | 1957 | The Unknown Terror                      | The Unknown Terror                      | Warren, Charles Marquis | Charles Marquis Warren | tt0051137 |
| 1746509063 | 1926 | 1926 | The Far Cry                             | The Far Cry                             | Balboni, Silvano        | Silvano Balboni        | tt0016842 |
| 1746576980 | 1951 | 1951 | The House on Telegraph Hill             | The House on Telegraph Hill             | Wise, Robert            | Robert Wise            | tt0043660 |
| 1746512919 | 1916 | 1916 | The Heart of a Hero                     | The Heart of a Hero                     | Chautard, Emile         | Emile Chautard         | tt0006773 |
| 1746508901 | 1924 | 1924 | The Enchanted Cottage                   | The Enchanted Cottage                   | Robertson, John S.      | John S. Robertson      | tt0014869 |
| 1746454806 | 1941 | 1941 | Back in the Saddle                      | Back in the Saddle                      | Landers, Lew            | Lew Landers            | tt0033366 |
| 1746534813 | 1922 | 1922 | Second Hand Rose                        | Second Hand Rose                        | Ingraham, Lloyd         | Lloyd Ingraham         | tt0013584 |
| 1746423833 | 1940 | 1940 | Murder in the Air                       | Murder in the Air                       | Seiler, Lewis           | Lewis Seiler           | tt0032820 |
| 1746233656 | 1966 | 1966 | The Sand Pebbles                        | The Sand Pebbles                        | Wise, Robert            | Robert Wise            | tt0060934 |
| 1746503810 | 1918 | 1918 | The Guilt of Silence                    | The Guilt of Silence                    | Clifton, Elmer          | Elmer Clifton          | tt0009135 |
| 1746393157 | 1987 | 1987 | La Bamba                                | La Bamba                                | Valdez, Luis            | Luis Valdez            | tt0093378 |
| 1746523331 | 1922 | 1922 | Face to Face                            | Face to Face                            | Grossman, Harry         | Harry Grossman         | tt0131375 |
| 1746455271 | 1999 | 1999 | Play It to the Bone                     | Play It to the Bone                     | Shelton, Ron            | Ron Shelton            | tt0196857 |
| 1746455424 | 1995 | 1995 | Mighty Morphin Power Rangers: The Movie | Mighty Morphin Power Rangers: The Movie | Spicer, Bryan           | Bryan Spicer           | tt0113820 |
| 1746555630 | 1954 | 1954 | Passion                                 | Passion                                 | Dwan, Allan             | Allan Dwan             | tt0047334 |
| 1746582318 | 1931 | 1931 | Sheer Luck                              | Sheer Luck                              | Mitchell, Bruce         | Bruce Mitchell         | tt0022371 |

|            |      |      |                                            |                                            |                                      |                      |           |
|------------|------|------|--------------------------------------------|--------------------------------------------|--------------------------------------|----------------------|-----------|
| 1746508725 | 1925 | 1925 | The Talker                                 | The Talker                                 | Green, Alfred E.                     | Alfred E. Green      | tt0016410 |
| 1746530718 | 1949 | 1949 | Tokyo Joe                                  | Tokyo Joe                                  | Heisler, Stuart                      | Stuart Heisler       | tt0041967 |
| 1746199558 | 1968 | 1968 | Arizona Bushwhackers                       | Arizona Bushwhackers                       | Selander, Lesley                     | Lesley Selander      | tt0062676 |
| 1745293633 | 2006 | 2006 | Gridiron Gang                              | Gridiron Gang                              | Joanou, Phil                         | Phil Joanou          | tt0421206 |
| 1746582403 | 1937 | 1937 | Thank You, Mr. Moto                        | Thank You, Mr. Moto                        | Foster, Norman                       | Norman Foster        | tt0029648 |
| 1746581648 | 1928 | 1928 | Three Sinners                              | Three Sinners                              | Lee, Rowland V.                      | Rowland V. Lee       | tt0019470 |
| 1746421614 | 1995 | 1995 | Grumpier Old Men                           | Grumpier Old Men                           | Deutch, Howard                       | Howard Deutch        | tt0113228 |
| 1746464984 | 1946 | 1946 | Blonde for a Day                           | Blonde for a Day                           | Newfield, Sam                        | Sam Newfield         | tt0038366 |
| 1746233935 | 1966 | 1966 | Alvarez Kelly                              | Alvarez Kelly                              | Dmytryk, Edward                      | Edward Dmytryk       | tt0060095 |
| 1746216710 | 1969 | 1969 | Precious Jewels                            | Precious Jewels                            | Stagg, William                       | William Stagg        | tt0138036 |
| 1746504215 | 1918 | 1918 | Danger Within                              | Danger Within                              | Berger, Rea                          | Rae Berger           | tt0008992 |
| 1746575046 | 1935 | 1935 | Ladies Crave Excitement                    | Ladies Crave Excitement                    | Grinde, Nick                         | Nick Grinde          | tt0026593 |
| 1746576725 | 1931 | 1931 | The Great Lover                            | The Great Lover                            | Beaumont, Harry                      | Harry Beaumont       | tt0021927 |
| 1746514867 | 1915 | 1915 | The Destroying Angel                       | The Destroying Angel                       | Ridgely, Richard                     | Richard Ridgely      | tt0005189 |
| 1769970053 | 1911 | 1911 | The Lady From the Sea                      | The Lady from the Sea                      | Henderson, Lucius J.                 | Lucius Henderson     | tt0234074 |
| 1746520214 | 1925 | 1925 | Range Vultures                             | Range Vultures                             |                                      |                      | tt0016264 |
| 1746566876 | 1953 | 1953 | Rogue's March                              | Rogue's March                              | Davis, Allan                         | Allan Davis          | tt0045097 |
| 1746491886 | 1948 | 1948 | Smart Politics                             | Smart Politics                             | Jason, Will                          | Will Jason           | tt0040803 |
| 1746580647 | 1939 | 1939 | Raffles                                    | Raffles                                    | Wood, Sam                            | Sam Wood             | tt0032963 |
| 1746584109 | 1938 | 1938 | The Mysterious Rider                       | The Mysterious Rider                       | Selander, Lesley                     | Lesley Selander      | tt0030484 |
| 1769970073 | 1912 | 1912 | Making a Man of Her                        | Making a Man of Her                        |                                      | Al Christie          | tt0234178 |
| 1746454355 | 1944 | 1944 | Irish Eyes Are Smiling                     | Irish Eyes Are Smiling                     | Ratoff, Gregory                      | Gregory Ratoff       | tt0036961 |
| 1746512111 | 1915 | 1915 | A Continental Girl                         | A Continental Girl                         | Adelman, Joseph                      | Joseph Adelman       | tt0005131 |
| 1746582975 | 1938 | 1938 | The Renegade Ranger                        | The Renegade Ranger                        | Howard, David                        | David Howard         | tt0030668 |
| 1746577477 | 1962 | 1962 | Deadly Duo                                 | Deadly Duo                                 | Le Borg, Reginald                    | Reginald Le Borg     | tt0204245 |
| 1746232957 | 1969 | 1969 | Angel, Angel, Down We Go                   | Angel, Angel, Down We Go                   | Thom, Robert                         | Robert Thom          | tt0065602 |
| 1746503863 | 1918 | 1918 | Moral Suicide                              | Moral Suicide                              | Abramson, Ivan                       | Ivan Abramson        | tt0009391 |
| 1746578619 | 1950 | 1950 | Wagon Master                               | Wagon Master                               | Ford, John                           | John Ford            | tt0043117 |
| 1746437975 | 1944 | 1943 | Lost Angel                                 | Lost Angel                                 | Rowland, Roy                         | Roy Rowland          | tt0036120 |
| 1746455654 | 1998 | 1998 | Hope Floats                                | Hope Floats                                | Whitaker, Forest                     | Forest Whitaker      | tt0119313 |
| 1746498257 | 1918 | 1918 | Woman                                      | Woman                                      | Tourneur, Maurice                    | Maurice Tourneur     | tt0009827 |
| 1746583178 | 1938 | 1937 | Charlie Chan at Monte Carlo                | Charlie Chan at Monte Carlo                | Forde, Eugene                        | Eugene Forde         | tt0028707 |
| 1746508161 | 1927 | 1928 | The Rush Hour                              | The Rush Hour                              | Hopper, E. Mason                     | E. Mason Hopper      | tt0019339 |
| 1745341747 | 2002 | 2002 | Half Past Dead                             | Half Past Dead                             | Paul, Don Michael                    | Don Michael Paul     | tt0297162 |
| 1746437180 | 1995 | 1995 | While You Were Sleeping                    | While You Were Sleeping                    | Turteltaub, Jon                      | Jon Turteltaub       | tt0114924 |
| 1746438303 | 1940 | 1940 | Souls in Pawn                              | Souls in Pawn                              | Melville, John                       | Melville Shyer       | tt0196965 |
| 1745309126 | 2007 | 2007 | What Would Jesus Buy?                      | What Would Jesus Buy?                      | VanAlkemade, Rob                     | Rob VanAlkemade      | tt0939681 |
| 1745340820 | 2004 | 2004 | A Love Song for Bobby Long                 | A Love Song for Bobby Long                 | Gabel, Shainee                       | Shainee Gabel        | tt0369672 |
| 1746524351 | 1928 | 1928 | A Lady of Chance                           | A Lady of Chance                           | Leonard, Robert Z.                   | Robert Z. Leonard    | tt0019067 |
| 1745282753 | 2005 | 2005 | Star Wars Episode III: Revenge of the Sith | Star Wars: Episode III Revenge of the Sith | Lucas, George                        | George Lucas         | tt0121766 |
| 1746577833 | 1939 | 1939 | The Arizona Kid                            | The Arizona Kid                            | Kane, Joseph                         | Joseph Kane          | tt0031051 |
| 1746581760 | 1928 | 1928 | The Pace That Kills                        | The Pace That Kills                        | Parker, Norton S.; O'Connor, William | William A. O'Connor  | tt0019242 |
| 1746578374 | 1961 | 1961 | The Clown and the Kid                      | The Clown and the Kid                      | Cahn, Edward L.                      | Edward L. Cahn       | tt0054753 |
| 1746580250 | 1937 | 1937 | Trouble in Morocco                         | Trouble in Morocco                         | Schoedsack, Ernest B.                | Ernest B. Schoedsack | tt0029693 |
| 1746410161 | 1982 | 1982 | Missing                                    | Missing                                    | Costa-Gavras                         | Costa                | tt0084335 |
| 1746524206 | 1910 | 1910 | Under the Stars and Stripes                | Under the Stars and Stripes                |                                      | Frank Beal           | tt1068675 |
| 1746573931 | 1962 | 1962 | Jack the Giant Killer                      | Jack the Giant Killer                      | Juran, Nathan                        | Nathan Juran         | tt0056112 |
| 1746509039 | 1926 | 1925 | Bluebeard's Seven Wives                    | Bluebeard's Seven Wives                    | Santell, Alfred                      | Alfred Santell       | tt0016667 |
| 1746512313 | 1916 | 1916 | The Almighty Dollar                        | The Almighty Dollar                        | Thornby, Robert                      | Robert Thornby       | tt0006346 |
| 1746424175 | 1940 | 1940 | Hidden Gold                                | Hidden Gold                                | Selander, Lesley                     | Lesley Selander      | tt0032592 |
| 1745359538 | 2003 | 2002 | Teknolust                                  | Teknolust                                  | Leeson, Lynn Hershman                | Lynn Hershman        | tt0270688 |
| 1745394365 | 2008 | 2008 | Fireproof                                  | Fireproof                                  | Kendrick, Alex                       | Alex Kendrick        | tt1129423 |
| 1746574171 | 1962 | 1962 | Taras Bulba                                | Taras Bulba                                | Thompson, J. Lee                     | J. Lee Thompson      | tt0056556 |
| 1745272756 | 2000 | 2000 | The Watcher                                | The Watcher                                | Charbanic, Joe                       | Joe Charbanic        | tt0204626 |
| 1746559979 | 1963 | 1963 | My Six Loves                               | My Six Loves                               | Champion, Gower                      | Gower Champion       | tt0057341 |
| 1746233692 | 1966 | 1966 | Penelope                                   | Penelope                                   | Hiller, Arthur                       | Arthur Hiller        | tt0060818 |
| 1746423577 | 1998 | 1998 | Desperate Measures                         | Desperate Measures                         | Schroeder, Barbet                    | Barbet Schroeder     | tt0118966 |

|            |      |      |                                     |                                     |                                 |                       |           |
|------------|------|------|-------------------------------------|-------------------------------------|---------------------------------|-----------------------|-----------|
| 1746409796 | 1987 | 1987 | Good Morning, Vietnam               | Good Morning, Vietnam               | Levinson, Barry                 | Barry Levinson        | tt0093105 |
| 1746578872 | 1960 | 1960 | The Big Night                       | The Big Night                       | Salkow, Sidney                  | Sidney Salkow         | tt0053654 |
| 1746423467 | 1998 | 1998 | Mafia!                              | Mafia!                              | Abrahams, Jim                   | Jim Abrahams          | tt0120741 |
| 1746487733 | 1919 | 1919 | The House Without Children          | The House Without Children          | Brodsky, Samuel                 | Samuel Brodsky        | tt0190465 |
| 1746198444 | 1969 | 1969 | The Gypsy Moths                     | The Gypsy Moths                     | Frankenheimer, John             | John Frankenheimer    | tt0064397 |
| 1746410168 | 1983 | 1983 | Young Warriors                      | Young Warriors                      | Foldes, Lawrence D.             | Lawrence David Foldes | tt0086625 |
| 1746532719 | 1928 | 1927 | Legionnaires In Paris               | Legionnaires in Paris               | Gillstrom, Arvid E.             | Arvid E. Gillstrom    | tt0135522 |
| 1746512769 | 1923 | 1923 | The Ramblin' Kid                    | The Ramblin' Kid                    | Sedgwick, Edward                | Edward Sedgwick       | tt0014394 |
| 1746464874 | 1946 | 1946 | It's Great to Be Young              | It's Great to Be Young              | Lord, Del                       | Del Lord              | tt0038649 |
| 1746571296 | 1952 | 1952 | My Six Convicts                     | My Six Convicts                     | Fregonese, Hugo                 | Hugo Fregonese        | tt0044940 |
| 1746566995 | 1933 | 1933 | Hold the Press                      | Hold the Press                      | Rosen, Phil                     | Phil Rosen            | tt0024132 |
| 1746424383 | 1940 | 1940 | Framed                              | Framed                              | Schuster, Harold                | Harold D. Schuster    | tt0032491 |
| 1746582922 | 1938 | 1938 | Gold Diggers in Paris               | Gold Diggers in Paris               | Enright, Ray                    | Ray Enright           | tt0030191 |
| 1746491848 | 1946 | 1946 | Below the Deadline                  | Below the Deadline                  | Beaudine, William               | William Beaudine      | tt0038349 |
| 1746503003 | 1917 | 1917 | God of Little Children              | God of Little Children              | Ridgely, Richard                | Richard Ridgely       | tt0175673 |
| 1746532934 | 1927 | 1927 | The Gay Old Bird                    | The Gay Old Bird                    | Raymaker, Herman C.             | Herman C. Raymaker    | tt0017920 |
| 1746434356 | 1993 | 1993 | Benny & Joon                        | Benny & Joon                        | Chechik, Jeremiah               | Jeremiah S. Chechik   | tt0106387 |
| 1746497879 | 1922 | 1921 | The Lotus Eater                     | The Lotus Eater                     | Neilan, Marshall                | Marshall Neilan       | tt0012406 |
| 1746513713 | 1916 | 1916 | Hazel Kirke                         | Hazel Kirke                         |                                 | Louis J. Gasnier      | tt0006763 |
| 1746573898 | 1960 | 1960 | Hell Bent for Leather               | Hell Bent for Leather               | Sherman, George                 | George Sherman        | tt0053899 |
| 1746512353 | 1916 | 1916 | The Manager of the B. and A.        | The Manager of the B & A            | McGowan, J. P.                  | J.P. McGowan          | tt0007030 |
| 1746578053 | 1937 | 1937 | The Life of Emile Zola              | The Life of Emile Zola              | Dieterle, William               | William Dieterle      | tt0029146 |
| 1746473690 | 1942 | 1942 | Ice-Capades Revue                   | Ice Capades Revue                   | Vorhaus, Bernard                | Bernard Vorhaus       | tt0034885 |
| 1746492730 | 1948 | 1948 | Desperadoes of Dodge City           | Desperadoes of Dodge City           | Ford, Philip                    | Philip Ford           | tt0040286 |
| 1746566050 | 1955 | 1955 | Blood Alley                         | Blood Alley                         | Wellman, William A.             | William A. Wellman    | tt0047889 |
| 1746486776 | 1918 | 1918 | His Daughter Pays                   | His Daughter Pays                   | Trinchera, Paul                 | Paolo Trinchera       | tt0184573 |
| 1746555722 | 1955 | 1955 | The Littlest Outlaw                 | The Littlest Outlaw                 | Gavaldón, Roberto; Marín, Jesús | Roberto Gavaldón      | tt0048304 |
| 1745374745 | 2002 | 2002 | About a Boy                         | About a Boy                         | Weitz, Paul; Weitz, Chris       | Chris Weitz           | tt0276751 |
| 1746208320 | 1965 | 1965 | Village of the Giants               | Village of the Giants               | Gordon, Bert I.                 | Bert I. Gordon        | tt0059878 |
| 1746562055 | 1954 | 1954 | This Is My Love                     | This Is My Love                     | Heisler, Stuart                 | Stuart Heisler        | tt0047576 |
| 1746577576 | 1933 | 1933 | The Woman Who Dared                 | The Woman Who Dared                 | Webb, Millard                   | Millard Webb          | tt0026002 |
| 1746584590 | 1930 | 1930 | Young Eagles                        | Young Eagles                        | Wellman, William A.             | William A. Wellman    | tt0021567 |
| 1746575018 | 1933 | 1933 | Alice in Wonderland                 | Alice in Wonderland                 | McLeod, Norman                  | Norman Z. McLeod      | tt0023753 |
| 1746573865 | 1956 | 1956 | Odongo                              | Odongo                              | Gilling, John                   | John Gilling          | tt0049568 |
| 1746235611 | 1980 | 1980 | How to Beat the High Cost of Living | How to Beat the High Co\$ of Living | Scheerer, Robert                | Robert Scheerer       | tt0080895 |
| 1746465019 | 1946 | 1946 | Shadows on the Range                | Shadows on the Range                | Hillyer, Lambert                | Lambert Hillyer       | tt0038930 |
| 1746574981 | 1937 | 1937 | Riders of the Rockies               | Riders of the Rockies               | Bradbury, R. N.                 | Robert N. Bradbury    | tt0029485 |
| 1746577776 | 1933 | 1933 | Man Hunt                            | Man Hunt                            | Cummings, Irving                | Irving Cummings       | tt0024294 |
| 1746500214 | 1923 | 1923 | The Grail                           | The Grail                           | Campbell, Colin                 | Colin Campbell        | tt0014098 |
| 1746561810 | 1955 | 1955 | Shotgun                             | Shotgun                             | Selander, Lesley                | Lesley Selander       | tt0048612 |
| 1746562458 | 1957 | 1957 | The Abductors                       | The Abductors                       | McLaglen, Andrew V.             | Andrew V. McLaglen    | tt0050092 |
| 1746566653 | 1952 | 1952 | Belles on Their Toes                | Belles on Their Toes                | Levin, Henry                    | Henry Levin           | tt0044410 |
| 1746501586 | 1916 | 1916 | The Sowers                          | The Sowers                          | de Mille, William C.            | William C. de Mille   | tt0007378 |
| 1746554781 | 1965 | 1965 | The Lollipop Cover                  | The Lollipop Cover                  | Chambers, Everett               | Everett Chambers      | tt0239567 |
| 1746269706 | 1976 | 1976 | St. Ives                            | St. Ives                            | Thompson, J. Lee                | J. Lee Thompson       | tt0075263 |
| 1746520785 | 1949 | 1949 | Down Memory Lane                    | Down Memory Lane                    | Karlson, Phil                   | Phil Karlson          | tt0041312 |
| 1746583154 | 1940 | 1940 | Virginia City                       | Virginia City                       | Curtiz, Michael                 | Michael Curtiz        | tt0033226 |
| 1746580789 | 1938 | 1938 | Swing Your Lady                     | Swing Your Lady                     | Enright, Ray                    | Ray Enright           | tt0030820 |
| 1746420787 | 1996 | 1996 | Before and After                    | Before and After                    | Schroeder, Barbet               | Barbet Schroeder      | tt0115645 |
| 1746453534 | 1941 | 1941 | Melody for Three                    | Melody for Three                    | Kenton, Erle C.                 | Erle C. Kenton        | tt0033898 |
| 1746577371 | 1958 | 1958 | Underwater Warrior                  | Underwater Warrior                  | Marton, Andrew                  | Andrew Marton         | tt0052336 |
| 1746581285 | 1961 | 1961 | Valley of the Dragons               | Valley of the Dragons               | Bernds, Edward                  | Edward Berndts        | tt0055583 |
| 1746581345 | 1910 | 1910 | The Livingston Case                 | The Livingston Case                 |                                 | Edwin S. Porter       | tt1507367 |
| 1746577109 | 1950 | 1950 | Rocketship X-M                      | Rocketship X M                      |                                 | Kurt Neumann          | tt0042897 |
| 1746420999 | 1992 | 1991 | Drive                               | Drive                               | Levy, Jefery                    | Jefery Levy           | tt0101773 |
| 1746235372 | 1978 | 1978 | Blue Collar                         | Blue Collar                         | Schrader, Paul                  | Paul Schrader         | tt0077248 |
| 1745358511 | 2004 | 2003 | Latter Days                         | Latter Days                         | Cox, C. Jay                     | C. Jay Cox            | tt0345551 |



|            |      |      |                                  |                                  |                              |                      |           |
|------------|------|------|----------------------------------|----------------------------------|------------------------------|----------------------|-----------|
| 1769970691 | 1968 | 1968 | Suburban Pagans                  | Suburban Pagans                  | Carse, Shannon               | William Rotsler      | tt0063656 |
| 1746465212 | 1942 | 1942 | Tortilla Flat                    | Tortilla Flat                    | Fleming, Victor              | Victor Fleming       | tt0035460 |
| 1746503283 | 1919 | 1919 | The Railroader                   | The Railroader                   | Campbell, Colin              | Colin Campbell       | tt0009531 |
| 1769970629 | 1968 | 1968 | The Bushwhacker                  | The Bushwhacker                  | Elliott, B. Ron              | Byron Mabe           | tt0212017 |
| 1746420899 | 1989 | 1989 | Millennium                       | Millennium                       | Anderson, Michael            | Michael Anderson     | tt0097883 |
| 1746524779 | 1923 | 1923 | Only 38                          | Only 38                          | de Mille, William C.         | William C. de Mille  | tt0014335 |
| 1746422637 | 1999 | 1999 | Crazy in Alabama                 | Crazy in Alabama                 | Banderas, Antonio            | Antonio Banderas     | tt0142201 |
| 1746410861 | 1988 | 1988 | Critters 2                       | Critters 2                       | Garris, Mike                 | Mick Garris          | tt0094919 |
| 1746501772 | 1922 | 1922 | Her Majesty                      | Her Majesty                      | Irving, George               | George Irving        | tt0134717 |
| 1746504100 | 1918 | 1918 | Mickey                           | Mickey                           | Jones, Richard; Young, James | F. Richard Jones     | tt0009369 |
| 1746509191 | 1926 | 1926 | The Gilded Highway               | The Gilded Highway               | Blackton, J. Stuart          | J. Stuart Blackton   | tt0016923 |
| 1746438295 | 1945 | 1945 | Bedside Manner                   | Bedside Manner                   | Stone, Andrew                | Andrew L. Stone      | tt0037530 |
| 1746582709 | 1939 | 1939 | One Dark Night                   | One Dark Night                   | Popkin, Leo C.               | Leo C. Popkin        | tt0031758 |
| 1746583956 | 1930 | 1930 | The Girl Said No                 | The Girl Said No                 | Wood, Sam                    | Sam Wood             | tt0020919 |
| 1746483835 | 1917 | 1917 | The Martinache Marriage          | The Martinache Marriage          | Bracken, Bert                | Bertram Bracken      | tt0178739 |
| 1746514761 | 1927 | 1927 | Galloping Thunder                | Galloping Thunder                | Pembroke, Scott              | Scott Pembroke       | tt0133787 |
| 1746494270 | 1910 | 1910 | A Summer Idyll                   | A Summer Idyll                   | Griffith, D. W.              | D.W. Griffith        | tt0001405 |
| 1746520290 | 1927 | 1927 | The Man From Hardpan             | The Man from Hard Pan            | Maloney, Leo D.              | Leo D. Maloney       | tt0018133 |
| 1746453556 | 1941 | 1941 | Hit the Road                     | Hit the Road                     | May, Joe                     | Joe May              | tt0033720 |
| 1746508185 | 1926 | 1926 | Officer Jim                      | Officer Jim                      | McGaugh, Wilbur              | Wilbur McGaugh       | tt0017219 |
| 1746583759 | 1930 | 1930 | The Vagabond King                | The Vagabond King                | Berger, Ludwig               | Ludwig Berger        | tt0021511 |
| 1746562428 | 1956 | 1956 | Emergency Hospital               | Emergency Hospital               | Sholem, Lee                  | Lee Sholem           | tt0049181 |
| 1746582669 | 1939 | 1939 | On Borrowed Time                 | On Borrowed Time                 | Bucquet, Harold S.           | Harold S. Bucquet    | tt0031754 |
| 1746453507 | 1943 | 1943 | Mexican Spitfire's Blessed Event | Mexican Spitfire's Blessed Event | Goodwins, Leslie             | Leslie Goodwins      | tt0036155 |
| 1746454971 | 1995 | 1995 | Just Cause                       | Just Cause                       | Glimcher, Arne               | Arne Glimcher        | tt0113501 |
| 1746570608 | 1952 | 1952 | Diplomatic Courier               | Diplomatic Courier               | Hathaway, Henry              | Henry Hathaway       | tt0044552 |
| 1746465401 | 1946 | 1946 | Wake Up and Dream                | Wake Up and Dream                | Bacon, Lloyd                 | Lloyd Bacon          | tt0039092 |
| 1746500077 | 1949 | 1948 | Quick on the Trigger             | Quick on the Trigger             | Nazarro, Ray                 | Ray Nazarro          | tt0041778 |
| 1746584316 | 1939 | 1939 | Sudden Money                     | Sudden Money                     | Grinde, Nick                 | Nick Grinde          | tt0031990 |
| 1746580255 | 1938 | 1938 | Racket Busters                   | Racket Busters                   | Bacon, Lloyd                 | Lloyd Bacon          | tt0030650 |
| 1769970632 | 1968 | 1968 | Tropic of Scorpio                | Tropic of Scorpio                | Crilly, Spence               | Zoltan G. Spencer    | tt0134165 |
| 1746453463 | 1945 | 1944 | Blonde Fever                     | Blonde Fever                     | Whorf, Richard               | Richard Whorf        | tt0036651 |
| 1746500182 | 1925 | 1925 | The Teaser                       | The Teaser                       | Seiter, William A.           | William A. Seiter    | tt0016413 |
| 1746578443 | 1951 | 1951 | Whistling Hills                  | Whistling Hills                  | Abrahams, Derwin             | Derwin Abrahams      | tt0044213 |
| 1746562464 | 1957 | 1957 | Spring Reunion                   | Spring Reunion                   | Pirosh, Robert               | Robert Pirosh        | tt0051007 |
| 1746211048 | 1974 | 1974 | The Centerfold Girls             | The Centerfold Girls             | Peyser, John                 | John Peyser          | tt0071295 |
| 1746497595 | 1917 | 1917 | The Renaissance at Charleroi     | The Renaissance at Charleroi     | Mills, Thomas R.             | Thomas R. Mills      | tt0008507 |
| 1746584108 | 1939 | 1938 | While New York Sleeps            | While New York Sleeps            | Humberstone, H. Bruce        | H. Bruce Humberstone | tt0030971 |
| 1745394603 | 2010 | 2009 | Bitch Slap                       | Bitch Slap                       | Jacobson, Rick               | Rick Jacobson        | tt1212974 |
| 1746520701 | 1925 | 1925 | Never the Twain Shall Meet       | Never the Twain Shall Meet       | Tourneur, Maurice            | Maurice Tourneur     | tt0016150 |
| 1746583224 | 1930 | 1930 | Dames Ahoy                       | Dames Ahoy                       | Craft, William James         | William James Craft  | tt0020803 |
| 1745282535 | 2006 | 2006 | Scary Movie 4                    | Scary Movie 4                    | Zucker, David                | David Zucker         | tt0362120 |
| 1746578414 | 1950 | 1950 | Rustlers on Horseback            | Rustlers on Horseback            | Brannon, Fred C.             | Fred C. Brannon      | tt0042912 |
| 1746576710 | 1932 | 1931 | Men of Chance                    | Men of Chance                    | Archainbaud, George          | George Archainbaud   | tt0023209 |
| 1769970621 | 1966 | 1966 | The Agony of Love                | Agony of Love                    | Rotsler, William             | William Rotsler      | tt0122879 |
| 1746574876 | 1933 | 1933 | Captured!                        | Captured!                        | Del Ruth, Roy                | Roy Del Ruth         | tt0023872 |
| 1745342753 | 2004 | 2004 | The Alamo                        | The Alamo                        | Hancock, John Lee            | John Lee Hancock     | tt0318974 |
| 1746218043 | 1968 | 1968 | Speed Lovers                     | The Speed Lovers                 | McGaha, William              | William F. McGaha    | tt0230807 |
| 1746508225 | 1927 | 1927 | Ragtime                          | Ragtime                          | Pembroke, Scott              | Scott Pembroke       | tt0018302 |
| 1746580676 | 1939 | 1939 | Southward Ho!                    | Southward Ho                     | Kane, Joseph                 | Joseph Kane          | tt0031958 |
| 1746577044 | 1961 | 1961 | The Sins of Rachel Cade          | The Sins of Rachel Cade          | Douglas, Gordon              | Gordon Douglas       | tt0055453 |
| 1746454070 | 1945 | 1945 | His Brother's Ghost              | His Brother's Ghost              | Newfield, Sam                | Sam Newfield         | tt0037779 |
| 1746578731 | 1962 | 1962 | Terror at Black Falls            | Terror at Black Falls            | Sarafian, Richard C.         | Richard C. Sarafian  | tt0056570 |
| 1746555743 | 1956 | 1955 | The Spoilers                     | The Spoilers                     | Hibbs, Jesse                 | Jesse Hibbs          | tt0048652 |
| 1746568328 | 1952 | 1952 | Bronco Buster                    | Bronco Buster                    | Boetticher, Budd             | Budd Boetticher      | tt0044452 |
| 1746570049 | 1934 | 1934 | Back Page                        | Back Page                        | Lorenze, Anton               | Anton Lorenze        | tt0024857 |
| 1769970825 | 1912 | 1912 | Maiden and Men                   | Maiden and Men                   |                              | Allan Dwan           | tt0163082 |

|            |      |      |                                              |                                              |                          |                      |           |
|------------|------|------|----------------------------------------------|----------------------------------------------|--------------------------|----------------------|-----------|
| 1746584443 | 1930 | 1930 | On Your Back                                 | On Your Back                                 | McClintic, Guthrie       | Guthrie McClintic    | tt0021207 |
| 1746520742 | 1949 | 1949 | Stampede                                     | Stampede                                     | Selander, Lesley         | Lesley Selander      | tt0041917 |
| 1746580730 | 1937 | 1937 | The Riders of the Whistling Skull            | Riders of the Whistling Skull                | Wright, Mack V.          | Mack V. Wright       | tt0029486 |
| 1746583931 | 1930 | 1930 | The Dawn Patrol                              | The Dawn Patrol                              | Hawks, Howard            | Howard Hawks         | tt0020815 |
| 1746509533 | 1926 | 1926 | April Fool                                   | April Fool                                   | Ross, Nat                | Nat Ross             | tt0016607 |
| 1745282885 | 2005 | 2005 | The Family Stone                             | The Family Stone                             | Bezucha, Thomas          | Thomas Bezucha       | tt0356680 |
| 1746465411 | 1945 | 1945 | Dillinger                                    | Dillinger                                    | Nosseck, Max             | Max Nosseck          | tt0037644 |
| 1746484396 | 1918 | 1918 | Thieves' Gold                                | Thieves' Gold                                | Ford, Jack               | John Ford            | tt0009690 |
| 1746570374 | 1934 | 1934 | Unknown Blonde                               | Unknown Blonde                               | Henley, Hobart           | Hobart Henley        | tt0025934 |
| 1746454922 | 1944 | 1944 | Three of a Kind                              | Three of a Kind                              | Lederman, D. Ross        | D. Ross Lederman     | tt0036721 |
| 1745282890 | 2005 | 2004 | Sons of Provo                                | Sons of Provo                                | Swenson, Will            | Will Swenson         | tt0396223 |
| 1746573640 | 1931 | 1931 | New Adventures of Get Rich Quick Wallingford | New Adventures of Get Rich Quick Wallingford | Wood, Sam                | Sam Wood             | tt0022198 |
| 1746585196 | 1929 | 1929 | Fury of the Wild                             | Fury of the Wild                             | d'Usseau, Leon           | Leon D'Usseau        | tt0019914 |
| 1746438605 | 1941 | 1941 | Across the Sierras                           | Across the Sierras                           | Lederman, D. Ross        | D. Ross Lederman     | tt0033313 |
| 1746513242 | 1917 | 1917 | The Awakening of Ruth                        | The Awakening of Ruth                        | Griffith, Edward H.      | Edward H. Griffith   | tt0007664 |
| 1745294049 | 2007 | 2007 | Gone Baby Gone                               | Gone Baby Gone                               | Affleck, Ben             | Ben Affleck          | tt0452623 |
| 1746570308 | 1934 | 1934 | He Was Her Man                               | He Was Her Man                               | Bacon, Lloyd             | Lloyd Bacon          | tt0025226 |
| 1745282821 | 2006 | 2006 | Superman Returns                             | Superman Returns                             | Singer, Bryan            | Bryan Singer         | tt0348150 |
| 1746504616 | 1920 | 1920 | Pollyanna                                    | Pollyanna                                    | Powell, Paul             | Paul Powell          | tt0011588 |
| 1746503463 | 1921 | 1921 | Under the Lash                               | Under the Lash                               | Wood, Sam                | Sam Wood             | tt0012790 |
| 1746584777 | 1930 | 1930 | Song o' My Heart                             | Song o' My Heart                             | Borzage, Frank           | Frank Borzage        | tt0021401 |
| 1746561114 | 1965 | 1965 | I'll Take Sweden                             | I'll Take Sweden                             | De Cordova, Frederick    | Frederick De Cordova | tt0059298 |
| 1746569553 | 1955 | 1955 | Hell's Island                                | Hell's Island                                | Karlson, Phil            | Phil Karlson         | tt0048160 |
| 1746583129 | 1935 | 1935 | The Call of the Wild                         | Call of the Wild                             | Wellman, William         | William A. Wellman   | tt0026164 |
| 1746582009 | 1928 | 1928 | The Play Girl                                | The Play Girl                                | Rosson, Arthur           | Arthur Rosson        | tt0019280 |
| 1746571885 | 1931 | 1931 | Peach-O-Reno                                 | Peach O Reno                                 | Seiter, William A.       | William A. Seiter    | tt0022259 |
| 1746584597 | 1929 | 1929 | Times Square                                 | Times Square                                 | Boyle, Joseph C.         | Joseph Boyle         | tt0019479 |
| 1746574612 | 1937 | 1937 | Souls at Sea                                 | Souls at Sea                                 | Hathaway, Henry          | Henry Hathaway       | tt0029593 |
| 1745302611 | 2007 | 2007 | Bridge to Terabithia                         | Bridge to Terabithia                         | Csupo, Gabor             | Gabor Csupo          | tt0398808 |
| 1746567822 | 1932 | 1932 | A Passport to Hell                           | A Passport to Hell                           | Lloyd, Frank             | Frank Lloyd          | tt0023323 |
| 1746498345 | 1919 | 1919 | Brass Buttons                                | Brass Buttons                                | King, Henry              | Henry King           | tt0009961 |
| 1746467298 | 1917 | 1917 | The Man Trap                                 | The Man Trap                                 | Clifton, Elmer           | Elmer Clifton        | tt0008254 |
| 1746582733 | 1935 | 1936 | Collegiate                                   | Collegiate                                   | Murphy, Ralph            | Ralph Murphy         | tt0027457 |
| 1746509353 | 1924 | 1924 | Cheap Kisses                                 | Cheap Kisses                                 | Ince, John; Tate, Cullen | John Ince            | tt0014769 |
| 1769977358 | 1921 | 1920 | Heart of the West                            | Hearts of the West                           | Goldstone, Phil          | Phil Goldstone       | tt1087587 |
| 1746583710 | 1929 | 1929 | The Girl in the Glass Cage                   | The Girl in the Glass Cage                   | Dawson, Ralph            | Ralph Dawson         | tt0019928 |
| 1746564459 | 1953 | 1953 | Combat Squad                                 | Combat Squad                                 | Roth, Cy                 | Cy Roth              | tt0045638 |
| 1746515852 | 1921 | 1921 | By Right of Birth                            | By Right of Birth                            | Gant, Harry              | Harry A. Gant        | tt0009978 |
| 1746408844 | 1992 | 1992 | School Ties                                  | School Ties                                  | Mandel, Robert           | Robert Mandel        | tt0105327 |
| 1746580521 | 1937 | 1937 | Thin Ice                                     | Thin Ice                                     | Lanfield, Sidney         | Sidney Lanfield      | tt0029659 |
| 1746578473 | 1951 | 1951 | Fury of the Congo                            | Fury of the Congo                            | Berke, William           | William Berke        | tt0043570 |
| 1746566997 | 1932 | 1932 | Tarzan the Ape Man                           | Tarzan the Ape Man                           | Van Dyke, W. S.          | W.S. Van Dyke        | tt0023551 |
| 1746580847 | 1939 | 1939 | The Great Man Votes                          | The Great Man Votes                          | Kanin, Garson            | Garson Kanin         | tt0031392 |
| 1746513464 | 1914 | 1914 | Fantasma                                     | Fantasma                                     | Seay, Charles M.         | Charles M. Seay      | tt0003929 |
| 1746508891 | 1949 | 1949 | Reign of Terror                              | Reign of Terror                              | Mann, Anthony            | Anthony Mann         | tt0041796 |
| 1745302652 | 2006 | 2006 | This Film Is Not Yet Rated                   | This Film Is Not Yet Rated                   | Dick, Kirby              | Kirby Dick           | tt0493459 |
| 1746504370 | 1919 | 1919 | Told in the Hills                            | Told in the Hills                            | Melford, George          | George Melford       | tt0010788 |
| 1746504378 | 1921 | 1921 | Face of the World                            | The Face of the World                        | Willat, Irvin V.         | Irvin Willat         | tt0012146 |
| 1745272115 | 2001 | 2000 | Memento                                      | Memento                                      | Nolan, Christopher       | Christopher Nolan    | tt0209144 |
| 1745359511 | 2003 | 2003 | How to Lose a Guy in 10 Days                 | How to Lose a Guy in 10 Days                 | Petrie, Donald           | Donald Petrie        | tt0251127 |
| 1746555071 | 1956 | 1957 | The Body Is a Shell                          | The Body Is a Shell                          | Gould, Merle S.          | Merle S. Gould       | tt0050202 |
| 1746562345 | 1955 | 1955 | The Lonesome Trail                           | The Lonesome Trail                           | Bartlett, Richard        | Richard Bartlett     | tt0048311 |
| 1746496032 | 1918 | 1918 | An Alien Enemy                               | An Alien Enemy                               | Worsley, Wallace         | Wallace Worsley      | tt0182693 |
| 1746503406 | 1921 | 1921 | Stranger Than Fiction                        | Stranger Than Fiction                        | Barry, J. A.             | J.A. Barry           | tt0012730 |
| 1746582478 | 1935 | 1934 | Gunfire                                      | Gunfire                                      | Fraser, Harry            | Harry L. Fraser      | tt0026392 |
| 1746582159 | 1931 | 1931 | Are These Our Children                       | Are These Our Children                       | Ruggles, Wesley          | Wesley Ruggles       | tt0021615 |
| 1746514091 | 1915 | 1915 | Jordan Is a Hard Road                        | Jordan Is a Hard Road                        | Dwan, Allan              | Allan Dwan           | tt0005573 |

|            |      |      |                                         |                                         |                                  |                       |           |
|------------|------|------|-----------------------------------------|-----------------------------------------|----------------------------------|-----------------------|-----------|
| 1746514714 | 1910 | 1910 | Unexpected Help                         | Unexpected Help                         | Griffith, D. W.                  | D. W. Griffith        | tt0001435 |
| 1746574006 | 1961 | 1961 | Then There Were Three                   | Then There Were Three                   | Nicol, Alex                      | Alex Nicol            | tt0055520 |
| 1746582882 | 1937 | 1937 | Stage Door                              | Stage Door                              | LaCava, Gregory                  | Gregory La Cava       | tt0029604 |
| 1746566752 | 1952 | 1952 | Viva Zapata!                            | Viva Zapata!                            | Kazan, Elia                      | Elia Kazan            | tt0045296 |
| 1746582894 | 1937 | 1937 | She's Got Everything                    | She's Got Everything                    | Santley, Joseph                  | Joseph Santley        | tt0030741 |
| 1746554925 | 1964 | 1964 | The Misadventures of Merlin Jones       | The Misadventures of Merlin Jones       | Stevenson, Robert                | Robert Stevenson      | tt0058355 |
| 1746438285 | 1941 | 1941 | The Royal Mounted Patrol                | The Royal Mounted Patrol                | Hillyer, Lambert                 | Lambert Hillyer       | tt0034134 |
| 1746487764 | 1919 | 1919 | The Gray Horizon                        | The Gray Horizon                        | Worthington, William             | William Worthington   | tt0325494 |
| 1746530707 | 1950 | 1950 | The Good Humor Man                      | The Good Humor Man                      | Bacon, Lloyd                     | Lloyd Bacon           | tt0042514 |
| 1746583976 | 1936 | 1936 | Last of the Warrens                     | Last of the Warrens                     | Bradbury, Robert N.              | Robert N. Bradbury    | tt0027870 |
| 1746503880 | 1917 | 1917 | The Duplicity of Hargraves              | The Duplicity of Hargraves              | Mills, Thomas R.                 | Thomas R. Mills       | tt0193120 |
| 1746584085 | 1939 | 1939 | The Lone Wolf Spy Hunt                  | The Lone Wolf Spy Hunt                  | Godfrey, Peter                   | Peter Godfrey         | tt0031589 |
| 1769971104 | 1969 | 1969 | Hedonistic Pleasures                    | Hedonistic Pleasures                    | Weldon, Mike                     | Ed De Priest          | tt0219759 |
| 1746584105 | 1935 | 1935 | While the Patient Slept                 | While the Patient Slept                 | Enright, Ray                     | Ray Enright           | tt0027204 |
| 1746512317 | 1915 | 1915 | Nearly a Lady                           | Nearly a Lady                           | Bosworth, Hobart                 | Hobart Bosworth       | tt0005803 |
| 1746582872 | 1938 | 1938 | The Crime of Doctor Hallet              | The Crime of Doctor Hallet              | Simon, S. Sylvan                 | S. Sylvan Simon       | tt0030028 |
| 1746271352 | 1980 | 1980 | Fame                                    | Fame                                    | Parker, Alan                     | Alan Parker           | tt0080716 |
| 1746512462 | 1915 | 1915 | Milestones of Life                      | Milestones of Life                      |                                  | Eugene Moore          | tt0005744 |
| 1746584780 | 1929 | 1929 | The Man From Nevada                     | The Man from Nevada                     | McGowan, J. P.                   | J.P. McGowan          | tt0020137 |
| 1746434649 | 1996 | 1996 | Mystery Science Theater 3000: The Movie | Mystery Science Theater 3000: The Movie | Mallon, Jim                      | Jim Mallon            | tt0117128 |
| 1746491893 | 1946 | 1946 | Detour to Danger                        | Detour to Danger                        | Talmadge, Richard; Parry, Harvey | Harvey Parry          | tt0235340 |
| 1746464952 | 1942 | 1942 | Inside the Law                          | Inside the Law                          | MacFadden, Hamilton              | Hamilton MacFadden    | tt0034898 |
| 1769970152 | 1912 | 1912 | Fatty's Big Mix-Up                      | Fatty's Big Mix Up                      |                                  |                       | tt0327713 |
| 1746574178 | 1957 | 1957 | The Joker Is Wild                       | The Joker Is Wild                       | Vidor, Charles                   | Charles Vidor         | tt0050569 |
| 1746524340 | 1915 | 1915 | A Modern Magdalen                       | A Modern Magdalen                       | Davis, Will S.                   | Will S. Davis         | tt0005761 |
| 1746439432 | 1995 | 1995 | Se7en                                   | Se7en                                   | Fincher, David                   | David Fincher         | tt0114369 |
| 1746500338 | 1923 | 1923 | Has the World Gone Mad                  | Has the World Gone Mad!                 | Dawley, J. Searle                | J. Searle Dawley      | tt0014117 |
| 1746436532 | 1941 | 1941 | They Meet Again                         | They Meet Again                         | Kenton, Erle C.                  | Erle C. Kenton        | tt0034279 |
| 1745309717 | 2005 | 2005 | The Baxter                              | The Baxter                              | Showalter, Michael               | Michael Showalter     | tt0401244 |
| 1746565949 | 1953 | 1953 | Sangaree                                | Sangaree                                | Ludwig, Edward                   | Edward Ludwig         | tt0046272 |
| 1746513391 | 1916 | 1916 | The Chattel                             | The Chattel                             | Thomson, Fred                    | Frederick A. Thomson  | tt0006499 |
| 1746516313 | 1920 | 1920 | The Silent Barrier                      | The Silent Barrier                      | Worthington, William             | William Worthington   | tt0197881 |
| 1769976125 | 1926 | 1927 | Nothing to Live For                     | Nothing to Live For                     | Richmond, Joseph A.              | Joseph R. Richmond    | tt1999936 |
| 1746553394 | 1964 | 1964 | Naughty Dallas                          | Naughty Dallas                          | Buchanan, Larry                  | Larry Buchanan        | tt0058393 |
| 1746500559 | 1926 | 1925 | Desperate Chance                        | A Desperate Chance                      | McGowan, J. P.                   | J.P. McGowan          | tt0014846 |
| 1746465365 | 1944 | 1944 | The Big Bonanza                         | The Big Bonanza                         | Archainbaud, George              | George Archainbaud    | tt0036642 |
| 1746580848 | 1936 | 1936 | Ambush Valley                           | Ambush Valley                           | Shamray, Franklin                | Bernard B. Ray        | tt0027289 |
| 1746508744 | 1949 | 1949 | Beyond the Forest                       | Beyond the Forest                       | Vidor, King                      | King Vidor            | tt0041172 |
| 1746503287 | 1918 | 1918 | Ann's Finish                            | Ann's Finish                            | Ingraham, Lloyd                  | Lloyd Ingraham        | tt0008835 |
| 1746555421 | 1955 | 1955 | Devil Goddess                           | Devil Goddess                           | Bennet, Spencer G.               | Spencer Gordon Bennet | tt0047991 |
| 1746577888 | 1936 | 1936 | The Mysterious Avenger                  | The Mysterious Avenger                  | Selman, David                    | David Selman          | tt0028013 |
| 1746421676 | 1995 | 1995 | Last Summer in the Hamptons             | Last Summer in the Hamptons             | Jaglom, Henry                    | Henry Jaglom          | tt0113612 |
| 1746474983 | 1948 | 1948 | The Cobra Strikes                       | The Cobra Strikes                       | Riesner, Charles F.              | Charles Reisner       | tt0040239 |
| 1746504408 | 1920 | 1920 | The Hidden Light                        | The Hidden Light                        | Schomer, Abraham S.              | Abraham S. Schomer    | tt0012275 |
| 1746465290 | 1942 | 1942 | Born to Sing                            | Born to Sing                            | Ludwig, Edward                   | Edward Ludwig         | tt0034543 |
| 1746423311 | 1992 | 1992 | The Mighty Ducks                        | The Mighty Ducks                        | Herek, Stephen                   | Stephen Herek         | tt0104868 |
| 1746577620 | 1938 | 1938 | Arrest Bulldog Drummond                 | Arrest Bulldog Drummond                 | Hogan, James                     | James P. Hogan        | tt0031054 |
| 1745393722 | 2008 | 2008 | The Hottie and the Nottie               | The Hottie & the Nottie                 | Putnam, Tom                      | Tom Putnam            | tt0804492 |
| 1746436248 | 1998 | 1997 | I Love You, Don't Touch Me!             | I Love You, Don't Touch Me!             | Davis, Julie                     | Julie Davis           | tt0130019 |
| 1769973239 | 1970 | 1970 | How to Succeed with Sex                 | How to Succeed with Sex                 | Gordon, Bert I.                  | Bert I. Gordon        | tt0064450 |
| 1746524778 | 1923 | 1923 | The Courtship of Miles Standish         | The Courtship of Myles Standish         | Sullivan, Frederick              | Frederick Sullivan    | tt0013950 |
| 1745282783 | 2005 | 2005 | Serenity                                | Serenity                                | Whedon, Joss                     | Joss Whedon           | tt0379786 |
| 1746500650 | 1924 | 1924 | The Red Lily                            | The Red Lily                            | Niblo, Fred                      | Fred Niblo            | tt0015268 |
| 1746508188 | 1927 | 1927 | Long Pants                              | Long Pants                              | Capra, Frank                     | Frank Capra           | tt0018102 |
| 1746582671 | 1935 | 1935 | Branded a Coward                        | Branded a Coward                        | Newfield, Sam                    | Sam Newfield          | tt0026133 |
| 1746576833 | 1932 | 1932 | Dancers in the Dark                     | Dancers in the Dark                     | Burton, David                    | David Burton          | tt0022799 |
| 1746520239 | 1926 | 1926 | Things Wives Tell                       | Things Wives Tell                       | Dierker, Hugh                    | Hugh Dierker          | tt0344445 |

|                   |             |             |                                     |                                     |                                 |                       |                  |
|-------------------|-------------|-------------|-------------------------------------|-------------------------------------|---------------------------------|-----------------------|------------------|
| 1746570980        | 1934        | 1934        | Love Birds                          | Love Birds                          | Seiter, William A.              | William A. Seiter     | tt0024271        |
| 1746566121        | 1956        | 1956        | Patterns                            | Patterns                            | Cook, Fielder                   | Fielder Cook          | tt0049601        |
| 1745359331        | 2009        | 2009        | It's Complicated                    | It's Complicated                    | Meyers, Nancy                   | Nancy Meyers          | tt1230414        |
| 1746410138        | 1992        | 1992        | Christopher Columbus: The Discovery | Christopher Columbus: The Discovery | Glen, John                      | John Glen             | tt0103962        |
| 1746392899        | 1984        | 1984        | Sole Survivor                       | Sole Survivor                       | Eberhardt, Thom                 | Thom Eberhardt        | tt0181012        |
| 1746492209        | 1948        | 1948        | Heart of Virginia                   | Heart of Virginia                   | Springsteen, R. G.              | R.G. Springsteen      | tt0040709        |
| 1746572982        | 1932        | 1932        | The Cowboy Counsellor               | The Cowboy Counsellor               | Melford, George                 | George Melford        | tt0023912        |
| 1746525094        | 1919        | 1919        | Hearts of Men                       | Hearts of Men                       | Beban, George                   | George Beban          | tt0164048        |
| 1746567933        | 1934        | 1934        | Crimson Romance                     | Crimson Romance                     | Howard, David                   | David Howard          | tt0025011        |
| 1746574714        | 1935        | 1935        | Rendezvous                          | Rendezvous                          | Howard, William K.; Wood, Sam   | William K. Howard     | tt0026922        |
| 1746249051        | 1974        | 1973        | All the Young Wives                 | All the Young Wives                 | Diehl, William                  | William Diehl         | tt0163117        |
| 1746582912        | 1937        | 1937        | Charlie Chan on Broadway            | Charlie Chan on Broadway            | Forde, Eugene                   | Eugene Forde          | tt0028709        |
| 1746502449        | 1915        | 1915        | The Man Who Beat Dan Dolan          | The Man Who Beat Dan Dolan          | Mahony, J. J.                   | J.J. Mahony           | tt0005694        |
| 1746500560        | 1926        | 1925        | The Vanishing American              | The Vanishing American              | Seitz, George B.                | George B. Seitz       | tt0016480        |
| 1746492595        | 1948        | 1948        | A Woman's Vengeance                 | A Woman's Vengeance                 | Korda, Zoltan                   | Zoltan Korda          | tt0040002        |
| 1746504613        | 1921        | 1921        | Fifty Candles                       | Fifty Candles                       | Willat, Irvin V.                | Irvin Willat          | tt0012160        |
| 1746234552        | 1967        | 1967        | Turn On, Tune In, Drop Out          | Turn On, Tune In, Drop Out          | Clark, Robin                    | Robin S. Clark        | tt0249208        |
| 1746497310        | 1921        | 1921        | The Wakefield Case                  | The Wakefield Case                  | Irving, George                  | George Irving         | tt0012817        |
| 1746562074        | 1953        | 1953        | The Girl Next Door                  | The Girl Next Door                  | Sale, Richard                   | Richard Sale          | tt0045815        |
| 1746211505        | 1972        | 1972        | Pocket Money                        | Pocket Money                        | Rosenberg, Stuart               | Stuart Rosenberg      | tt0069103        |
| 1746499853        | 1948        | 1948        | Lady at Midnight                    | Lady at Midnight                    | Scott, Sherman                  | Sam Newfield          | tt0040524        |
| 1746509349        | 1949        | 1949        | The Accused                         | The Accused                         | Dieterle, William               | William Dieterle      | tt0040071        |
| 1746532932        | 1923        | 1923        | Look Your Best                      | Look Your Best                      | Hughes, Rupert                  | Rupert Hughes         | tt0014212        |
| 1746394211        | 1984        | 1983        | Love Letters                        | Love Letters                        | Jones, Amy                      | Amy Holden Jones      | tt0085871        |
| 1746582539        | 1937        | 1937        | The Girl from Scotland Yard         | The Girl from Scotland Yard         | Vignola, Robert                 | Robert G. Vignola     | tt0028929        |
| 1746577376        | 1951        | 1951        | Havana Rose                         | Havana Rose                         | Beaudine, William               | William Beaudine      | tt0043623        |
| 1746409991        | 1984        | 1984        | Silent Madness                      | Silent Madness                      | Nuchtern, Simon                 | Simon Nuchtern        | tt0088116        |
| 1746569774        | 1957        | 1956        | Untamed Mistress                    | Untamed Mistress                    | Ormond, Ron                     | Ron Ormond            | tt0046482        |
| 1746435685        | 1942        | 1942        | Reunion in France                   | Reunion in France                   | Dassin, Jules                   | Jules Dassin          | tt0035250        |
| 1746210163        | 1971        | 1971        | Bunny O'Hare                        | Bunny O'Hare                        | Oswald, Gerd                    | Gerd Oswald           | tt0066870        |
| 1746475248        | 1944        | 1944        | Dangerous Journey                   | Dangerous Journey                   | Denis, Armand; Roosevelt, Leila | Armand Denis          | tt2282749        |
| 1745309342        | 2007        | 2007        | The Kingdom                         | The Kingdom                         | Berg, Peter                     | Peter Berg            | tt0431197        |
| 1746514459        | 1923        | 1923        | Temporary Marriage                  | Temporary Marriage                  | Hillyer, Lambert                | Lambert Hillyer       | tt0014529        |
| 1745396198        | 2010        | 2009        | Happy Tears                         | Happy Tears                         | Lichtenstein, Mitchell          | Mitchell Lichtenstein | tt1219828        |
| 1769970742        | 1912        | 1912        | A Baby's Shoe                       | A Baby's Shoe                       |                                 | Charles Brabin        | tt0415533        |
| 1746420237        | 1992        | 1992        | Simple Men                          | Simple Men                          | Hartley, Hal                    | Hal Hartley           | tt0105411        |
| 1746464882        | 1942        | 1942        | Song of the Islands                 | Song of the Islands                 | Lang, Walter                    | Walter Lang           | tt0035361        |
| <b>1746508703</b> | <b>1926</b> | <b>1926</b> | <b>Forlorn River</b>                | <b>Forlorn River</b>                | <b>Waters, John</b>             | <b>John Waters</b>    | <b>tt0016902</b> |
| 1746474798        | 1948        | 1948        | Smugglers' Cove                     | Smugglers' Cove                     | Beaudine, William               | William Beaudine      | tt0040805        |
| 1746583035        | 1939        | 1939        | North of Shanghai                   | North of Shanghai                   | Lederman, D. Ross               | D. Ross Lederman      | tt0031732        |
| 1746582809        | 1937        | 1937        | Borneo                              | Borneo                              |                                 | Truman H. Talley      | tt0028654        |
| 1746475770        | 1948        | 1948        | The Inside Story                    | The Inside Story                    | Dwan, Allan                     | Allan Dwan            | tt0040474        |
| 1746574802        | 1935        | 1935        | Way Down East                       | Way Down East                       | King, Henry                     | Henry King            | tt0027185        |
| 1746475965        | 1948        | 1948        | Johnny Belinda                      | Johnny Belinda                      | Negulesco, Jean                 | Jean Negulesco        | tt0040495        |
| 1746578695        | 1961        | 1961        | True Gang Murders                   | True Gang Murders                   | Rosenfield, Sherman             | Sherman Rosenfield    | tt6812302        |
| 1746439482        | 1941        | 1941        | Prairie Pioneers                    | Prairie Pioneers                    | Orlebeck, Lester                | Lester Orlebeck       | tt0034057        |
| 1746566356        | 1954        | 1954        | Battle of Rogue River               | Battle of Rogue River               | Castle, William                 | William Castle        | tt0046755        |
| 1746582594        | 1935        | 1935        | Cheers of the Crowd                 | Cheers of the Crowd                 | Moore, Vin                      | Vin Moore             | tt0026203        |
| 1746574748        | 1933        | 1933        | International House                 | International House                 | Sutherland, Edward              | A. Edward Sutherland  | tt0024183        |
| 1746423281        | 1997        | 1997        | Truth or Consequences, N. M.        | Truth or Consequences, N.M.         | Sutherland, Kiefer              | Kiefer Sutherland     | tt0120383        |
| 1746571565        | 1931        | 1931        | A House Divided                     | A House Divided                     | Wylar, William                  | William Wylar         | tt0021978        |
| 1746514671        | 1916        | 1916        | The Heart of the Hills              | The Heart of the Hills              | Ridgely, Richard                | Richard Ridgely       | tt0006775        |
| 1746560123        | 1964        | 1964        | The Strangler                       | The Strangler                       | Topper, Burt                    | Burt Topper           | tt0058622        |
| 1746515592        | 1918        | 1918        | The Vigilantes                      | The Vigilantes                      | Kabierske, Henry                | Henry Kabierske       | tt0011825        |
| 1746409435        | 1985        | 1985        | The Mean Season                     | The Mean Season                     | Borsos, Phillip                 | Phillip Borsos        | tt0089572        |
| 1746523693        | 1915        | 1915        | The District Attorney               | The District Attorney               | O'Neil, Barry                   | Barry O'Neil          | tt0005201        |
| 1746509318        | 1925        | 1925        | Smouldering Fires                   | Smouldering Fires                   | Brown, Clarence                 | Clarence Brown        | tt0016361        |

|            |      |      |                                   |                                   |                                     |                          |           |
|------------|------|------|-----------------------------------|-----------------------------------|-------------------------------------|--------------------------|-----------|
| 1746582507 | 1939 | 1939 | The Adventures of Sherlock Holmes | The Adventures of Sherlock Holmes | Werker, Alfred                      | Alfred L. Werker         | tt0031022 |
| 1746523732 | 1923 | 1923 | Let's Go                          | Let's Go                          | Howard, William K.                  | William K. Howard        | tt0014196 |
| 1746570356 | 1934 | 1934 | Bulldog Drummond Strikes Back     | Bulldog Drummond Strikes Back     | Del Ruth, Roy                       | Roy Del Ruth             | tt0024932 |
| 1746393090 | 1981 | 1981 | Body and Soul                     | Body and Soul                     | Bowers, George                      | George Bowers            | tt0082090 |
| 1746533168 | 1915 | 1915 | The Raven                         | The Raven                         | Brabin, Charles J.                  | Charles Brabin           | tt0005955 |
| 1746580274 | 1939 | 1939 | My Son Is Guilty                  | My Son Is Guilty                  | Barton, Charles                     | Charles Barton           | tt0031698 |
| 1746436997 | 1940 | 1940 | The Trail Blazers                 | The Trail Blazers                 | Sherman, George                     | George Sherman           | tt0033179 |
| 1746500238 | 1927 | 1927 | Rough and Ready                   | Rough and Ready                   | Rogell, Albert                      | Albert S. Rogell         | tt0018347 |
| 1746520822 | 1925 | 1925 | Charley's Aunt                    | Charley's Aunt                    | Sidney, Scott                       | Scott Sidney             | tt0005076 |
| 1746218711 | 1973 | 1973 | The Sting                         | The Sting                         | Hill, George Roy                    | George Roy Hill          | tt0070735 |
| 1746530774 | 1950 | 1949 | Riders of the Pony Express        | Riders of the Pony Express        | Salle, Michael                      | Michael Salle            | tt0232534 |
| 1746437843 | 1945 | 1945 | House of Dracula                  | House of Dracula                  | Kenton, Erle C.                     | Erle C. Kenton           | tt0037793 |
| 1746582297 | 1931 | 1931 | Palmy Days                        | Palmy Days                        | Sutherland, Edward                  | A. Edward Sutherland     | tt0022246 |
| 1746486821 | 1919 | 1919 | The Heart of a Gypsy              | The Heart of a Gypsy              | Webster, Henry McRae; Miller, Charl | Harry McRae Webster      | tt0010231 |
| 1746465250 | 1946 | 1946 | Little Giant                      | Little Giant                      | Seiter, William A.                  | William A. Seiter        | tt0038694 |
| 1746465167 | 1945 | 1945 | Men in Her Diary                  | Men in Her Diary                  | Barton, Charles                     | Charles Barton           | tt0037908 |
| 1746583942 | 1930 | 1930 | Her Wedding Night                 | Her Wedding Night                 | Tuttle, Frank                       | Frank Tuttle             | tt0020968 |
| 1746584870 | 1939 | 1939 | On Trial                          | On Trial                          | Morse, Terry                        | Terry O. Morse           | tt0031755 |
| 1746512102 | 1927 | 1927 | The Black Diamond Express         | The Black Diamond Express         | Bretherton, Howard                  | Howard Bretherton        | tt0017677 |
| 1746508691 | 1926 | 1926 | The Reckless Lady                 | The Reckless Lady                 | Higgin, Howard                      | Howard Higgin            | tt0017314 |
| 1746501316 | 1923 | 1923 | The Love Piker                    | The Love Piker                    | Hopper, E. Mason                    | E. Mason Hopper          | tt0014219 |
| 1746503824 | 1921 | 1921 | The Foolish Matrons               | The Foolish Matrons               | Tourneur, Maurice; Brown, Clarence  | Clarence Brown           | tt0012183 |
| 1746502328 | 1916 | 1916 | Nanette of the Wilds              | Nanette of the Wilds              | Kaufman, Joseph                     | Joseph Kaufman           | tt0007114 |
| 1746485911 | 1918 | 1918 | The City of Tears                 | The City of Tears                 | Wilson, Elsie Jane                  | Elsie Jane Wilson        | tt0008964 |
| 1746563876 | 1953 | 1953 | The Big Break                     | The Big Break                     | Strick, Joseph                      | Joseph Strick            | tt0350615 |
| 1746491977 | 1946 | 1946 | Joe Palooka, Champ                | Joe Palooka, Champ                | LeBorg, Reginald                    | Reginald Le Borg         | tt0038655 |
| 1746570837 | 1952 | 1952 | Confidence Girl                   | Confidence Girl                   | Stone, Andrew L.                    | Andrew L. Stone          | tt0044513 |
| 1746504738 | 1919 | 1919 | Soldiers of Fortune               | Soldiers of Fortune               | Dwan, Allan                         | Allan Dwan               | tt0010715 |
| 1746584248 | 1936 | 1935 | Reckless Buckaroos                | The Reckless Buckaroo             | Fraser, Harry                       | Harry L. Fraser          | tt0240854 |
| 1746515783 | 1920 | 1920 | The Third Woman                   | The Third Woman                   | Swickard, Charles                   | Charles Swickard         | tt0011763 |
| 1746572274 | 1910 | 1910 | The Cow Puncher's Sweetheart      | The Cow Puncher's Sweetheart      |                                     | Sidney Olcott            | tt0397373 |
| 1746503622 | 1919 | 1919 | When a Girl Loves                 | When a Girl Loves                 | Weber, Lois; Smalley, Phillips      | Phillips Smalley         | tt0010878 |
| 1746568214 | 1933 | 1933 | Topaze                            | Topaze                            | D'Arrast, D'Abbadie                 | Harry d'Abbadie d'Arrast | tt0024684 |
| 1746433925 | 2000 | 2000 | Boiler Room                       | Boiler Room                       | Younger, Ben                        | Ben Younger              | tt0181984 |
| 1745358697 | 2009 | 2009 | My Bloody Valentine               | My Bloody Valentine               | Lussier, Patrick                    | Patrick Lussier          | tt1179891 |
| 1746503353 | 1922 | 1922 | John Smith                        | John Smith                        | Heerman, Victor                     | Victor Heerman           | tt0013278 |
| 1746523978 | 1914 | 1914 | Behind the Scenes                 | Behind the Scenes                 | Kirkwood, James                     | James Kirkwood           | tt0003670 |
| 1746581743 | 1928 | 1928 | The Street of Sin                 | Street of Sin                     | Stiller, Mauritz                    | Mauritz Stiller          | tt0019431 |
| 1746512074 | 1914 | 1914 | Wildflower                        | Wildflower                        | Dwan, Allan                         | Allan Dwan               | tt0004816 |
| 1746584369 | 1940 | 1940 | Blazing Six Shooters              | Blazing Six Shooters              | Lewis, Joseph H.                    | Joseph H. Lewis          | tt0032259 |
| 1746497026 | 1918 | 1918 | Winner Takes All                  | Winner Takes All                  | Clifton, Elmer                      | Elmer Clifton            | tt0009816 |
| 1746569767 | 1958 | 1958 | Auntie Mame                       | Auntie Mame                       | DaCosta, Morton                     | Morton DaCosta           | tt0051383 |
| 1746524829 | 1928 | 1928 | The Old Code                      | The Old Code                      | Wilson, Benjamin Franklin           | Ben F. Wilson            | tt0019230 |
| 1745309595 | 2005 | 2005 | The Perfect Man                   | The Perfect Man                   | Rosman, Mark                        | Mark Rosman              | tt0380623 |
| 1745282724 | 2006 | 2006 | Failure to Launch                 | Failure to Launch                 | Dey, Tom                            | Tom Dey                  | tt0427229 |
| 1746409369 | 1993 | 1993 | Boxing Helena                     | Boxing Helena                     | Lynch, Jennifer Chambers            | Jennifer Lynch           | tt0106471 |
| 1746210156 | 1971 | 1971 | Klute                             | Klute                             | Pakula, Alan J.                     | Alan J. Pakula           | tt0067309 |
| 1746438199 | 1943 | 1943 | A Scream in the Dark              | A Scream in the Dark              | Sherman, George                     | George Sherman           | tt0037250 |
| 1746580576 | 1937 | 1937 | The Prince and the Pauper         | The Prince and the Pauper         | Keighley, William                   | William Keighley         | tt0029440 |
| 1746487136 | 1920 | 1920 | The Deceiver                      | The Deceiver                      | Hersholt, Jean; Moomaw, L. H.       | Jean Hersholt            | tt0012100 |
| 1746492450 | 1944 | 1944 | Moonlight and Cactus              | Moonlight and Cactus              | Cline, Edward F.                    | Edward F. Cline          | tt0037086 |
| 1746577239 | 1962 | 1962 | Airborne                          | Airborne                          | Landis, James                       | James Landis             | tt0165081 |
| 1746484356 | 1918 | 1918 | The Lure of Luxury                | The Lure of Luxury                | Wilson, Elsie Jane                  | Elsie Jane Wilson        | tt0009324 |
| 1746508959 | 1925 | 1925 | His Secretary                     | His Secretary                     | Henley, Hobart                      | Hobart Henley            | tt0015919 |
| 1746509317 | 1925 | 1925 | The Verdict                       | The Verdict                       | Windemere, Fred                     | Fred Windemere           | tt0016486 |
| 1746523990 | 1916 | 1916 | The Waifs                         | The Waifs                         | Sidney, Scott                       | Scott Sidney             | tt0007529 |
| 1746570749 | 1934 | 1934 | The Case of the Howling Dog       | The Case of the Howling Dog       | Crosland, Alan                      | Alan Crosland            | tt0024958 |

|            |      |      |                                        |                                        |                                 |                     |           |
|------------|------|------|----------------------------------------|----------------------------------------|---------------------------------|---------------------|-----------|
| 1746503711 | 1917 | 1917 | The Edge of the Law                    | The Edge of the Law                    | Chaudet, Louis William          | Louis Chaudet       | tt0007881 |
| 1746422099 | 1999 | 1999 | Pushing Tin                            | Pushing Tin                            | Newell, Mike                    | Mike Newell         | tt0120797 |
| 1746576832 | 1932 | 1932 | They Never Come Back                   | They Never Come Back                   | Newmeyer, Fred                  | Fred C. Newmeyer    | tt0136560 |
| 1746580451 | 1938 | 1938 | The Frontiersmen                       | The Frontiersmen                       | Selander, Lesley                | Lesley Selander     | tt0030161 |
| 1746219155 | 1974 | 1974 | W                                      | Two                                    | Quine, Richard                  | Charles Trieschmann | tt0072332 |
| 1746532645 | 1923 | 1923 | The Drug Traffic                       | The Drug Traffic                       | Cummings, Irving                | Irving Cummings     | tt0014005 |
| 1745359013 | 2002 | 2002 | The Tuxedo                             | The Tuxedo                             | Donovan, Kevin                  | Kevin Donovan       | tt0290095 |
| 1746512113 | 1916 | 1916 | Her Bitter Cup                         | Her Bitter Cup                         | Madison, Cleo                   | Joe King            | tt0006785 |
| 1746219229 | 1974 | 1974 | Phase IV                               | Phase IV                               | Bass, Saul                      | Saul Bass           | tt0070531 |
| 1746564146 | 1952 | 1952 | Night Raiders                          | Night Raiders                          | Bretherton, Howard P.           | Howard Bretherton   | tt0044965 |
| 1746561562 | 1957 | 1957 | An Affair to Remember                  | An Affair to Remember                  | McCarey, Leo                    | Leo McCarey         | tt0050105 |
| 1746465141 | 1942 | 1942 | Sunday Punch                           | Sunday Punch                           | Miller, David                   | David Miller        | tt0035393 |
| 1746532460 | 1915 | 1915 | The Governor's Lady                    | The Governor's Lady                    | Melford, George                 | George Melford      | tt0005407 |
| 1745395716 | 2010 | 2010 | Dread                                  | The Dream                              | DiBlasi, Anthony                | William Cronin      | tt1718922 |
| 1746520741 | 1926 | 1926 | Redheads Preferred                     | Redheads Preferred                     | Dale, Allan                     | Allen Dale          | tt0017320 |
| 1746582156 | 1931 | 1931 | The Front Page                         | The Front Page                         | Milestone, Lewis                | Lewis Milestone     | tt0021890 |
| 1746523322 | 1915 | 1915 | The Pretenders                         | The Pretenders                         | Vignola, Robert G.              | Robert G. Vignola   | tt0005920 |
| 1746577435 | 1959 | 1959 | Third Man on the Mountain              | Third Man on the Mountain              | Annakin, Ken                    | Ken Annakin         | tt0053352 |
| 1746209895 | 1970 | 1970 | Three-Way Split                        | Three Way Split                        | Nizet, Charles                  | Charles Nizet       | tt0259653 |
| 1746499864 | 1950 | 1950 | Mister 880                             | Mister 880                             | Goulding, Edmund                | Edmund Goulding     | tt0042742 |
| 1746487332 | 1919 | 1919 | The Heart of Juanita                   | Heart of Juanita                       | Middleton, George E.            | George E. Middleton | tt0202899 |
| 1746523562 | 1916 | 1916 | The Alibi                              | The Alibi                              | Scardon, Paul                   | Paul Scardon        | tt0006342 |
| 1746571334 | 1933 | 1933 | Ranger's Code                          | Ranger's Code                          | Bradbury, Robert N.             | Robert N. Bradbury  | tt0024488 |
| 1746495821 | 1918 | 1918 | The Honor of His House                 | The Honor of His House                 | Mille, William C. de            | William C. de Mille | tt0009196 |
| 1746584926 | 1940 | 1940 | Hidden Enemy                           | Hidden Enemy                           | Bretherton, Howard              | Howard Bretherton   | tt0032591 |
| 1746532609 | 1915 | 1915 | The Heart of a Painted Woman           | The Heart of a Painted Woman           |                                 | Alice Guy           | tt0005451 |
| 1746584908 | 1939 | 1939 | Andy Hardy Gets Spring Fever           | Andy Hardy Gets Spring Fever           | Van Dyke, W. S.                 | W.S. Van Dyke       | tt0031043 |
| 1746465424 | 1946 | 1946 | Ghost of Hidden Valley                 | Ghost of Hidden Valley                 | Newfield, Sam                   | Sam Newfield        | tt0038558 |
| 1746580782 | 1935 | 1935 | Forbidden Heaven                       | Forbidden Heaven                       |                                 | Reginald Barker     | tt0026375 |
| 1746584604 | 1928 | 1928 | The Lady of Victories                  | The Lady of Victories                  | Neill, R. William               | Roy William Neill   | tt0019068 |
| 1746435417 | 1995 | 1995 | Batman Forever                         | Batman Forever                         | Schumacher, Joel                | Joel Schumacher     | tt0112462 |
| 1746500187 | 1924 | 1924 | Painted People                         | Painted People                         | Badger, Clarence                | Clarence G. Badger  | tt0015209 |
| 1746437849 | 1940 | 1940 | You're Not So Tough                    | You're Not So Tough                    | May, Joe                        | Joe May             | tt0033284 |
| 1769969348 | 1932 | 1932 | The Circus Show-Up                     | The Circus Show Up                     | Seiler, Lou                     | Lewis Seiler        | tt0144139 |
| 1746569744 | 1957 | 1957 | Action of the Tiger                    | Action of the Tiger                    | Young, Terrence                 | Terence Young       | tt0050099 |
| 1746453457 | 1944 | 1944 | Babes on Swing Street                  | Babes on Swing Street                  | Lilley, Edward                  | Edward C. Lilley    | tt0036623 |
| 1746509250 | 1925 | 1924 | The Tornado                            | The Tornado                            | Baggot, King                    | King Baggot         | tt0015422 |
| 1746502703 | 1916 | 1916 | The Evil Women Do                      | The Evil Women Do                      | Julian, Rupert                  | Rupert Julian       | tt0006641 |
| 1746453852 | 1943 | 1943 | Henry Aldrich Haunts a House           | Henry Aldrich Haunts a House           | Bennett, Hugh                   | Hugh Bennett        | tt0035984 |
| 1746569876 | 1958 | 1958 | Mardi Gras                             | Mardi Gras                             | Goulding, Edmund                | Edmund Goulding     | tt0051908 |
| 1769971970 | 1969 | 1969 | Graffiti                               | Graffiti                               |                                 | C. Davis Smith      | tt0219711 |
| 1746248764 | 1975 | 1975 | I'm a Stranger Here Myself             | I'm a Stranger Here Myself             | Helpern, Jr., David             | David Helpern       | tt0071644 |
| 1746492743 | 1946 | 1946 | Miss Susie Slagle's                    | Miss Susie Slagle's                    | Berry, John                     | John Berry          | tt0037917 |
| 1746569748 | 1954 | 1955 | The Fast and the Furious               | The Fast and the Furious               | Sampson, Edwards; Ireland, John | John Ireland        | tt0046969 |
| 1746436127 | 1942 | 1942 | The Man Who Returned to Life           | The Man Who Returned to Life           | Landers, Lew                    | Lew Landers         | tt0035026 |
| 1746509227 | 1925 | 1925 | Seven Keys to Baldpate                 | Seven Keys to Baldpate                 | Newmeyer, Fred                  | Fred C. Newmeyer    | tt0016333 |
| 1746234982 | 1967 | 1967 | The Spirit Is Willing                  | The Spirit Is Willing                  | Castle, William                 | William Castle      | tt0062298 |
| 1746554742 | 1964 | 1964 | Good Neighbor Sam                      | Good Neighbor Sam                      | Swift, David                    | David Swift         | tt0058153 |
| 1745293279 | 2005 | 2004 | A Hole in One                          | A Hole in One                          | Ledes, Richard                  | Richard Ledes       | tt0337639 |
| 1746453522 | 1943 | 1943 | Tenting Tonight on the Old Camp Ground | Tenting Tonight on the Old Camp Ground | Collins, Lewis D.               | Lewis D. Collins    | tt0036420 |
| 1746574889 | 1937 | 1937 | Conquest                               | Conquest                               | Brown, Clarence                 | Clarence Brown      | tt0028739 |
| 1746491815 | 1948 | 1948 | Six-Gun Law                            | Six Gun Law                            | Nazarro, Ray                    | Ray Nazarro         | tt0040796 |
| 1746393331 | 1987 | 1987 | Maid to Order                          | Maid to Order                          | Jones, Amy                      | Amy Holden Jones    | tt0093476 |
| 1746516299 | 1920 | 1920 | His Own Law                            | His Own Law                            | Read, J. Parker                 | J. Parker Read Jr.  | tt0012285 |
| 1746583983 | 1935 | 1935 | His Fighting Blood                     | His Fighting Blood                     | English, John W.                | John English        | tt0026475 |
| 1746415812 | 1917 | 1918 | Love's Law                             | Love's Law                             | Johnson, Tefft                  | Francis J. Grandon  | tt0186322 |
| 1745342888 | 2001 | 2001 | 3000 Miles to Graceland                | 3000 Miles to Graceland                | Lichtenstein, Demian            | Demian Lichtenstein | tt0233142 |

|            |      |      |                                |                                |                                      |                       |           |
|------------|------|------|--------------------------------|--------------------------------|--------------------------------------|-----------------------|-----------|
| 1746421554 | 2000 | 1999 | American Pimp                  | American Pimp                  | Hughes, Allen ; Hughes, Albert       | Albert Hughes         | tt0179074 |
| 1745340780 | 2002 | 2002 | 8 Mile                         | 8 Mile                         | Hanson, Curtis                       | Curtis Hanson         | tt0298203 |
| 1746574898 | 1935 | 1935 | Grand Exit                     | Grand Exit                     | Kenton, Erle C.                      | Erle C. Kenton        | tt0026431 |
| 1746555531 | 1956 | 1956 | Uranium Boom                   | Uranium Boom                   | Castle, William                      | William Castle        | tt0049907 |
| 1746577993 | 1937 | 1937 | Racketeers in Exile            | Racketeers in Exile            | Kenton, Erle C.                      | Erle C. Kenton        | tt0029459 |
| 1746573604 | 1932 | 1932 | Once in a Lifetime             | Once in a Lifetime             | Mack, Russell                        | Russell Mack          | tt0023302 |
| 1746578694 | 1962 | 1962 | The Manchurian Candidate       | The Manchurian Candidate       | Frankenheimer, John                  | John Frankenheimer    | tt0056218 |
| 1746474492 | 1944 | 1944 | Marshal of Reno                | Marshal of Reno                | Grissell, Wallace                    | Wallace Grissell      | tt0037053 |
| 1746566646 | 1932 | 1932 | That's My Boy                  | That's My Boy                  | Neill, Roy William                   | Roy William Neill     | tt0023576 |
| 1746520731 | 1926 | 1926 | Starlight's Revenge            | Starlight's Revenge            | Webb, Harry                          | Harry S. Webb         | tt0166820 |
| 1746554855 | 1964 | 1964 | The Troublemaker               | The Troublemaker               | Flicker, Theodore J.                 | Theodore J. Flicker   | tt0058690 |
| 1746574237 | 1958 | 1958 | Never Love a Stranger          | Never Love a Stranger          | Stevens, Robert                      | Robert Stevens        | tt0051987 |
| 1746486450 | 1918 | 1918 | Madam Who                      | Madam Who                      | Barker, Reginald                     | Reginald Barker       | tt0009328 |
| 1746501224 | 1916 | 1916 | Acquitted                      | Acquitted                      | Powell, Paul                         | Paul Powell           | tt0006338 |
| 1746464991 | 1944 | 1944 | Leave It to the Irish          | Leave It to the Irish          | Beaudine, William                    | William Beaudine      | tt0037012 |
| 1746586160 | 1939 | 1939 | Stronger Than Desire           | Stronger Than Desire           | Fenton, Leslie                       | Leslie Fenton         | tt0031988 |
| 1745340531 | 2004 | 2004 | Exorcist: The Beginning        | Exorcist: The Beginning        | Harlin, Renny                        | Renny Harlin          | tt0204313 |
| 1746570038 | 1933 | 1933 | Beauty for Sale                | Beauty for Sale                | Boleslavsky, Richard                 | Richard Boleslawski   | tt0023785 |
| 1746453809 | 1943 | 1943 | Murder in Times Square         | Murder in Times Square         | Landers, Lew                         | Lew Landers           | tt0036180 |
| 1745342271 | 2009 | 2009 | What Goes Up                   | What Goes Up                   | Glatzer, Jonathan                    | Jonathan Glatzer      | tt0832318 |
| 1746436192 | 1999 | 1999 | Fight Club                     | Fight Club                     | Fincher, David                       | David Fincher         | tt0137523 |
| 1746524190 | 1914 | 1914 | The Million Dollar Robbery     | The Million Dollar Robbery     |                                      | Herbert Blaché        | tt0004337 |
| 1746420858 | 1989 | 1989 | Road House                     | Road House                     | Herrington, Rowdy                    | Rowdy Herrington      | tt0098206 |
| 1746571657 | 1931 | 1931 | Dracula                        | Dracula                        | Browning, Tod                        | Tod Browning          | tt0021814 |
| 1746454224 | 1942 | 1942 | Alias Boston Blackie           | Alias Boston Blackie           | Landers, Lew                         | Lew Landers           | tt0034445 |
| 1746514215 | 1923 | 1923 | Double Dealing                 | Double Dealing                 | Lehrman, Henry                       | Henry Lehrman         | tt0014000 |
| 1746453474 | 1943 | 1943 | Heaven Can Wait                | Heaven Can Wait                | Lubitsch, Ernst                      | Ernst Lubitsch        | tt0035979 |
| 1746474503 | 1947 | 1947 | Black Hills                    | Black Hills                    | Taylor, Ray                          | Ray Taylor            | tt0040169 |
| 1746582605 | 1935 | 1935 | Woman Wanted                   | Woman Wanted                   | Seitz, George B.                     | George B. Seitz       | tt0027227 |
| 1745341752 | 2003 | 2003 | Scary Movie 3                  | Scary Movie 3                  | Zucker, David                        | David Zucker          | tt0306047 |
| 1745374786 | 2009 | 2009 | Zombieland                     | Zombieland                     | Fleischer, Ruben                     | Ruben Fleischer       | tt1156398 |
| 1746568143 | 1952 | 1952 | Flesh and Fury                 | Flesh and Fury                 | Pevney, Joseph                       | Joseph Pevney         | tt0044622 |
| 1746577378 | 1962 | 1962 | Out of the Tiger's Mouth       | Out of the Tiger's Mouth       | Whelan, Tim                          | Tim Whelan Jr.        | tt0056320 |
| 1746563644 | 1953 | 1953 | Blowing Wild                   | Blowing Wild                   | Fregonese, Hugo                      | Hugo Fregonese        | tt0045563 |
| 1746434881 | 1998 | 1998 | Some Nudity Required           | Some Nudity Required           | Springer, Odette ; Demetrakas, Johar | Johanna Demetrakas    | tt0140559 |
| 1746570566 | 1934 | 1934 | The Barretts of Wimpole Street | The Barretts of Wimpole Street | Franklin, Sidney                     | Sidney Franklin       | tt0024865 |
| 1745282566 | 2005 | 2005 | Rumor Has It...                | Rumor Has It...                | Reiner, Rob                          | Rob Reiner            | tt0398375 |
| 1745342237 | 2009 | 2009 | Observe and Report             | Observe and Report             | Hill, Jody                           | Jody Hill             | tt1197628 |
| 1746436557 | 1940 | 1940 | Enemy Agent                    | Enemy Agent                    | Landers, Lew                         | Lew Landers           | tt0032443 |
| 1746565990 | 1957 | 1957 | Affair in Havana               | Affair in Havana               | Benedek, Laslo                       | Laslo Benedek         | tt0050103 |
| 1746556026 | 1957 | 1957 | Escapade in Japan              | Escapade in Japan              | Lubin, Arthur                        | Arthur Lubin          | tt0050363 |
| 1746524083 | 1915 | 1915 | Forbidden Fruit                | Forbidden Fruit                | Abramson, Ivan                       | Ivan Abramson         | tt0005348 |
| 1746508480 | 1925 | 1925 | Scarlet and Gold               | Scarlet and Gold               | Grandon, Frank                       | Francis J. Grandon    | tt0016321 |
| 1746585058 | 1928 | 1928 | Burning Up Broadway            | Burning Up Broadway            | Rosen, Phil                          | Phil Rosen            | tt0018734 |
| 1746508414 | 1925 | 1925 | Lady of the Night              | Lady of the Night              | Bell, Monta                          | Monta Bell            | tt0016005 |
| 1746574484 | 1934 | 1934 | Night Alarm                    | Night Alarm                    | Bennet, Spencer                      | Spencer Gordon Bennet | tt0025562 |
| 1746574477 | 1934 | 1934 | As the Earth Turns             | As the Earth Turns             | Green, Alfred                        | Alfred E. Green       | tt0023769 |
| 1746453523 | 1943 | 1943 | Klondike Kate                  | Klondike Kate                  | Castle, William                      | William Castle        | tt0036079 |
| 1746574707 | 1933 | 1933 | Sensation Hunters              | Sensation Hunters              | Vidor, Charles                       | Charles Vidor         | tt0025762 |
| 1746583414 | 1928 | 1928 | The Black Ace                  | The Black Ace                  | Maloney, Leo D.                      | Leo D. Maloney        | tt0018703 |
| 1746216756 | 1966 | 1966 | Moonlighting Wives             | Moonlighting Wives             | Sarno, Joe                           | Joseph W. Sarno       | tt0057320 |
| 1746500123 | 1924 | 1924 | Horse Sense                    | Horse Sense                    | Hayes, Ward                          | Ward Hayes            | tt0135455 |
| 1746465410 | 1945 | 1945 | State Fair                     | State Fair                     | Lang, Walter                         | Walter Lang           | tt0038116 |
| 1746567272 | 1952 | 1952 | Army Bound                     | Army Bound                     | Landres, Paul                        | Paul Landres          | tt0044373 |
| 1746569541 | 1955 | 1954 | They Were So Young             | They Were So Young             | Neumann, Kurt                        | Kurt Neumann          | tt0047213 |
| 1746561046 | 1965 | 1965 | Poor Little Rich Girl          | Poor Little Rich Girl          | Warhol, Andy                         | Andy Warhol           | tt0209246 |
| 1746584216 | 1934 | 1934 | The Party's Over               | The Party's Over               | Lang, Walter                         | Walter Lang           | tt0025630 |

|            |      |      |                                      |                                      |                                  |                        |           |
|------------|------|------|--------------------------------------|--------------------------------------|----------------------------------|------------------------|-----------|
| 1745393830 | 2008 | 2008 | Death Race                           | Death Race                           | Anderson, Paul W. S.             | Paul W.S. Anderson     | tt0452608 |
| 1746169474 | 1910 | 1910 | After Many Years                     | After Many Years                     |                                  |                        | tt0214446 |
| 1746198297 | 1966 | 1965 | Apache Uprising                      | Apache Uprising                      | Springsteen, R. G.               | R.G. Springsteen       | tt0060117 |
| 1746520991 | 1950 | 1950 | Louisa                               | Louisa                               | Hall, Alexander                  | Alexander Hall         | tt0042687 |
| 1746578816 | 1959 | 1959 | Revenge of the Virgins               | Revenge of the Virgins               | Perry, Peter                     | Peter Perry Jr.        | tt0178864 |
| 1746492216 | 1947 | 1947 | Lured                                | Lured                                | Sirk, Douglas                    | Douglas Sirk           | tt0039589 |
| 1746433741 | 1997 | 1997 | Leather Jacket Love Story            | Leather Jacket Love Story            | DeCoteau, David                  | David DeCoteau         | tt0119508 |
| 1746520107 | 1926 | 1926 | The Iron Rider                       | The Iron Rider                       | Jaccard, Jacques                 | Jacques Jaccard        | tt0017000 |
| 1746580198 | 1938 | 1938 | Love, Honor and Behave               | Love, Honor and Behave               | Logan, Stanley                   | Stanley Logan          | tt0030392 |
| 1746208166 | 1970 | 1970 | Events                               | Events                               | Baker, Fred                      | Fred Baker             | tt0210031 |
| 1746574011 | 1960 | 1960 | The Gallant Hours                    | The Gallant Hours                    | Montgomery, Robert               | Robert Montgomery      | tt0053849 |
| 1746574690 | 1937 | 1937 | 23 1/2 Hours Leave                   | 23 1/2 Hours Leave                   | Blystone, John G.                | John G. Blystone       | tt0028540 |
| 1746566295 | 1956 | 1956 | Behind the High Wall                 | Behind the High Wall                 | Biberman, Abner                  | Abner Biberman         | tt0048996 |
| 1746500569 | 1924 | 1924 | Dynamite Smith                       | Dynamite Smith                       | Ince, Ralph                      | Ralph Ince             | tt0014858 |
| 1746573801 | 1957 | 1957 | The Black Scorpion                   | The Black Scorpion                   | Ludwig, Edward                   | Edward Ludwig          | tt0050197 |
| 1746574900 | 1937 | 1937 | Quick Money                          | Quick Money                          | Killy, Edward                    | Edward Killy           | tt0030645 |
| 1746513390 | 1916 | 1916 | To Have and to Hold                  | To Have and to Hold                  | Melford, George H.               | George Melford         | tt0007462 |
| 1746454288 | 1942 | 1942 | Top Sergeant                         | Top Sergeant                         | Cabanne, Christy                 | Christy Cabanne        | tt0035455 |
| 1746515820 | 1921 | 1921 | The Cup of Life                      | The Cup of Life                      | Lee, Rowland V.                  | Rowland V. Lee         | tt0012082 |
| 1746235883 | 1976 | 1976 | The Last Tycoon                      | The Last Tycoon                      | Kazan, Elia                      | Elia Kazan             | tt0074777 |
| 1746474543 | 1947 | 1947 | Moss Rose                            | Moss Rose                            | Ratoff, Gregory                  | Gregory Ratoff         | tt0037089 |
| 1746523824 | 1923 | 1923 | Within the Law                       | Within the Law                       |                                  | Frank Lloyd            | tt0014619 |
| 1746556047 | 1955 | 1955 | Hit the Deck                         | Hit the Deck                         | Rowland, Roy                     | Roy Rowland            | tt0048171 |
| 1746465043 | 1947 | 1947 | Johnny O'Clock                       | Johnny O'Clock                       | Rossen, Robert                   | Robert Rossen          | tt0039515 |
| 1746582281 | 1951 | 1951 | Tokyo File 212                       | Tokyo File 212                       | McGowan, Dorrell; McGowan, Stuar | Dorrell McGowan        | tt0044133 |
| 1746498268 | 1919 | 1919 | The Greater Sinner                   | The Greater Sinner                   | Bloome, A. J.                    | A.J. Bloome            | tt0201645 |
| 1746491706 | 1947 | 1947 | The Gangster                         | The Gangster                         | Wiles, Gordon                    | Gordon Wiles           | tt0039410 |
| 1745374929 | 2009 | 2009 | The Girlfriend Experience            | The Girlfriend Experience            | Soderbergh, Steven               | Steven Soderbergh      | tt1103982 |
| 1746561344 | 1932 | 1932 | The Mouthpiece                       | The Mouthpiece                       | Flood, James; Nugent, Elliott    | James Flood            | tt0023240 |
| 1746409935 | 1987 | 1987 | Hollywood Shuffle                    | Hollywood Shuffle                    | Townsend, Robert                 | Robert Townsend        | tt0093200 |
| 1746409473 | 1986 | 1986 | Tough Guys                           | Tough Guys                           | Kanew, Jeff                      | Jeff Kanew             | tt0092105 |
| 1746503649 | 1921 | 1921 | Ghost City                           | Ghost City                           | Bertram, William                 | William Bertram        | tt0012213 |
| 1745293912 | 2005 | 2005 | The Weather Man                      | The Weather Man                      | Verbinski, Gore                  | Gore Verbinski         | tt0384680 |
| 1746435727 | 1942 | 1942 | Reap the Wild Wind                   | Reap the Wild Wind                   | DeMille, Cecil B.                | Cecil B. DeMille       | tt0035244 |
| 1746499899 | 1923 | 1923 | The Girl Who Came Back               | The Girl Who Came Back               | Forman, Tom                      | Tom Forman             | tt0014084 |
| 1746509570 | 1926 | 1926 | Her Second Chance                    | Her Second Chance                    | Hillyer, Lambert                 | Lambert Hillyer        | tt0016962 |
| 1746507767 | 1924 | 1924 | Abraham Lincoln                      | Abraham Lincoln                      | Rosen, Phil                      | J. Searle Dawley       | tt0461737 |
| 1746523981 | 1914 | 1914 | After the Ball                       | After the Ball                       |                                  | Pierce Kingsley        | tt0003605 |
| 1746523228 | 1915 | 1915 | Nedra                                | Nedra                                | José, Edward                     | Edward José            | tt0005804 |
| 1746437845 | 1943 | 1943 | Melody Parade                        | Melody Parade                        | Dreifuss, Arthur                 | Arthur Dreifuss        | tt0036151 |
| 1746524095 | 1915 | 1915 | The Nation's Peril                   | The Nation's Peril                   | Terwilliger, George              | George Terwilliger     | tt0005800 |
| 1746491704 | 1947 | 1947 | Curley                               | Curley                               | Carr, Bernard                    | Bernard Carr           | tt0039292 |
| 1746410366 | 1990 | 1989 | The Plot Against Harry               | The Plot Against Harry               | Roemer, Michael                  | Michael Roemer         | tt0064820 |
| 1746524128 | 1916 | 1916 | The Feast of Life                    | The Feast of Life                    | Capellani, Albert                | Albert Capellani       | tt0006670 |
| 1746577591 | 1937 | 1937 | Bad Guy                              | Bad Guy                              | Cahn, Edward                     | Edward L. Cahn         | tt0028601 |
| 1746208317 | 1966 | 1966 | Galaxie                              | Galaxie                              | Markopoulos, Gregory J.          | Gregory J. Markopoulos | tt0195733 |
| 1746424406 | 1940 | 1940 | Brother Rat and a Baby               | Brother Rat and a Baby               | Enright, Ray                     | Ray Enright            | tt0032286 |
| 1746580258 | 1937 | 1937 | Bank Alarm                           | Bank Alarm                           | Gasnier, Louis J.                | Louis J. Gasnier       | tt0028607 |
| 1746504082 | 1918 | 1918 | Station Content                      | Station Content                      | Hoyt, Arthur                     | Arthur Hoyt            | tt0009651 |
| 1746562088 | 1953 | 1953 | Latin Lovers                         | Latin Lovers                         | LeRoy, Mervyn                    | Mervyn LeRoy           | tt0045988 |
| 1746570832 | 1934 | 1934 | The Ghost Walks                      | The Ghost Walks                      | Strayer, Frank R.                | Frank R. Strayer       | tt0025169 |
| 1746583271 | 1931 | 1931 | Riders of the North                  | Riders of the North                  | McGowan, J. P.                   | J.P. McGowan           | tt0022313 |
| 1746583506 | 1928 | 1928 | The Count of Ten                     | The Count of Ten                     | Flood, James                     | James Flood            | tt0018796 |
| 1746492477 | 1945 | 1945 | Flame of the West                    | Flame of the West                    | Hillyer, Lambert                 | Lambert Hillyer        | tt0037703 |
| 1745302698 | 2007 | 2007 | Sarah Landon and the Paranormal Hour | Sarah Landon and the Paranormal Hour | Comrie, Lisa                     | Lisa Comrie            | tt0990376 |
| 1746568287 | 1933 | 1933 | The Story of Temple Drake            | The Story of Temple Drake            | Roberts, Stephen                 | Stephen Roberts        | tt0024617 |
| 1746422523 | 1993 | 1993 | The Real McCoy                       | The Real McCoy                       | Mulcahy, Russell                 | Russell Mulcahy        | tt0107927 |



|                   |             |             |                                 |                                 |                                    |                       |                  |
|-------------------|-------------|-------------|---------------------------------|---------------------------------|------------------------------------|-----------------------|------------------|
| 1746491994        | 1945        | 1945        | Stranger from Santa Fe          | Stranger from Santa Fe          | Hillyer, Lambert                   | Lambert Hillyer       | tt0038128        |
| 1746523367        | 1910        | 1910        | Romantic Redskins               | Romantic Redskins               |                                    | Tom Ricketts          | tt0234620        |
| 1746485913        | 1918        | 1918        | Riddle Gawne                    | Riddle Gawne                    | Hart, William S.; Hillyer, Lambert | William S. Hart       | tt0009550        |
| 1746499879        | 1948        | 1948        | Blonde Ice                      | Blonde Ice                      | Bernhard, Jack                     | Jack Bernhard         | tt0041187        |
| 1746570056        | 1952        | 1952        | Strange Fascination             | Strange Fascination             | Haas, Hugo                         | Hugo Haas             | tt0045199        |
| 1746500947        | 1915        | 1915        | Lord John in New York           | Lord John in New York           | Le Saint, Edward J.                | Edward LeSaint        | tt0005649        |
| 1746437627        | 1997        | 1997        | Kiss Me, Guido                  | Kiss Me, Guido                  | Vitale, Tony                       | Tony Vitale           | tt0119465        |
| 1746580686        | 1938        | 1938        | Women Are Like That             | Women Are Like That             | Logan, Stanley                     | Stanley Logan         | tt0030985        |
| 1746487857        | 1918        | 1918        | The Landloper                   | The Landloper                   | Irving, George                     | George Irving         | tt0009278        |
| 1746582236        | 1931        | 1931        | Ladies of the Big House         | Ladies of the Big House         | Gering, Marion                     | Marion Gering         | tt0022042        |
| 1746235200        | 1977        | 1977        | End of the World                | End of the World                | Hayes, John                        | John Hayes            | tt0075990        |
| 1746514585        | 1916        | 1916        | Little Lady Eileen              | Little Lady Eileen              | Dawley, J. Searle                  | J. Searle Dawley      | tt0006930        |
| 1746582450        | 1934        | 1934        | Sisters Under the Skin          | Sisters Under the Skin          | Burton, David                      | David Burton          | tt0025798        |
| 1746501941        | 1916        | 1916        | The Prince of Graustark         | The Prince of Graustark         | Wright, Fred E.                    | Fred E. Wright        | tt0007220        |
| 1746437355        | 1942        | 1942        | Mr. Wise Guy                    | Mr. Wise Guy                    | Nigh, William                      | William Nigh          | tt0035092        |
| 1746562135        | 1955        | 1955        | One Desire                      | One Desire                      | Hopper, Jerry                      | Jerry Hopper          | tt0048448        |
| 1746208131        | 1969        | 1969        | Follow Me                       | Follow Me                       | McCabe, Gene                       | Gene McCabe           | tt0178458        |
| 1746486424        | 1919        | 1919        | Luck in Pawn                    | Luck in Pawn                    | Edwards, Walter                    | Walter Edwards        | tt0010405        |
| 1746168492        | 1910        | 1910        | An Arizona Romance              | An Arizona Romance              |                                    | Theodore Wharton      | tt1495674        |
| 1746235250        | 1974        | 1974        | One by One                      | One by One                      | DuBoc, Claude                      | Claude Du Boc         | tt0071942        |
| 1746454367        | 1941        | 1941        | So Ends Our Night               | So Ends Our Night               | Cromwell, John                     | John Cromwell         | tt0034208        |
| 1746574774        | 1938        | 1938        | Torchy Blane in Panama          | Torchy Blane in Panama          | Clemens, William                   | William Clemens       | tt0030883        |
| 1746562107        | 1955        | 1955        | Naked Sea                       | The Naked Sea                   | Miner, Allen H.                    | Allen H. Miner        | tt0143762        |
| 1746566197        | 1957        | 1957        | Will Success Spoil Rock Hunter? | Will Success Spoil Rock Hunter? | Tashlin, Frank                     | Frank Tashlin         | tt0051196        |
| 1746501476        | 1914        | 1914        | The Dollar Mark                 | The Dollar Mark                 | Lund, O. A. C.                     | O.A.C. Lund           | tt0003856        |
| 1746574460        | 1934        | 1934        | Burn-'Em-Up Barnes              | Burn 'Em Up Barnes              | Clark, Colbert; Schaefer, Armand   | Colbert Clark         | tt0024936        |
| 1746573964        | 1959        | 1959        | Operation Dames                 | Operation Dames                 | Stoumen, Louis Clyde               | Louis Clyde Stoumen   | tt0053142        |
| 1746500611        | 1927        | 1927        | Jewels of Desire                | Jewels of Desire                | Powell, Paul                       | Paul Powell           | tt0018039        |
| 1746257424        | 1980        | 1980        | Stir Crazy                      | Stir Crazy                      | Poitier, Sidney                    | Sidney Poitier        | tt0081562        |
| 1746581868        | 1928        | 1928        | The Passion Song                | Passion Song                    | Hoyt, Harry O.                     | Harry O. Hoyt         | tt0020261        |
| 1746574029        | 1959        | 1959        | Surrender--Hell!                | Surrender Hell!                 | Barnwell, John                     | John Barnwell         | tt0051032        |
| 1746530792        | 1950        | 1950        | Ma and Pa Kettle Go to Town     | Ma and Pa Kettle Go to Town     | Lamont, Charles                    | Charles Lamont        | tt0042697        |
| 1746421345        | 1989        | 1989        | Fletch Lives                    | Fletch Lives                    | Ritchie, Michael                   | Michael Ritchie       | tt0097366        |
| 1745373062        | 2010        | 2010        | Winter's Bone                   | Winter's Bone                   | Granik, Debra                      | Debra Granik          | tt1399683        |
| 1746436060        | 1941        | 1941        | Swamp Water                     | Swamp Water                     | Renoir, Jean                       | Jean Renoir           | tt0034251        |
| <b>1746524967</b> | <b>1915</b> | <b>1915</b> | <b>Her Own Way</b>              | <b>Her Own Way</b>              | <b>Blaché, Herbert</b>             | <b>Herbert Blaché</b> | <b>tt0005474</b> |
| 1746562295        | 1954        | 1954        | Ring of Fear                    | Ring of Fear                    | Grant, James Edward                | James Edward Grant    | tt0047416        |
| 1746454524        | 1996        | 1996        | Swingers                        | Swingers                        | Liman, Doug                        | Doug Liman            | tt0117802        |
| 1745342883        | 2003        | 2003        | Identity                        | Identity                        | Mangold, James                     | James Mangold         | tt0309698        |
| 1746585487        | 1940        | 1940        | Gang War                        | Gang War                        | Popkin, Leo C.                     | Leo C. Popkin         | tt0032508        |
| 1769970047        | 1911        | 1911        | His Son                         | His Son                         | Fahrney, Milton J.                 | Milton J. Fahrney     | tt0364410        |
| 1746577913        | 1934        | 1934        | The Defense Rests               | The Defense Rests               | Hillyer, Lambert                   | Lambert Hillyer       | tt0025040        |
| 1746583675        | 1931        | 1931        | Tonight or Never                | Tonight or Never                | LeRoy, Mervyn                      | Mervyn LeRoy          | tt0022489        |
| 1746508965        | 1924        | 1924        | The Silent Stranger             | The Silent Stranger             | Rogell, Albert                     | Albert S. Rogell      | tt0015333        |
| 1746514767        | 1916        | 1916        | The Witch                       | The Witch                       | Powell, Frank                      | Frank Powell          | tt0007574        |
| 1746569971        | 1958        | 1958        | Man from God's Country          | Man from God's Country          | Landres, Paul                      | Paul Landres          | tt0051897        |
| 1746434627        | 1999        | 1999        | Varsity Blues                   | Varsity Blues                   | Robbins, Brian                     | Brian Robbins         | tt0139699        |
| 1746584974        | 1940        | 1940        | No, No Nanette                  | No, No, Nanette                 | Wilcox, Herbert                    | Herbert Wilcox        | tt0032847        |
| 1746574306        | 1961        | 1961        | The Comancheros                 | The Comancheros                 | Curtiz, Michael                    | Michael Curtiz        | tt0054757        |
| 1746566236        | 1958        | 1958        | Kathy O'                        | Kathy O'                        | Sher, Jack                         | Jack Sher             | tt0051813        |
| 1746583674        | 1928        | 1928        | Honeymoon Flats                 | Honeymoon Flats                 | Webb, Millard                      | Millard Webb          | tt0019017        |
| 1746574886        | 1933        | 1933        | Sweepings                       | Sweepings                       | Cromwell, John                     | John Cromwell         | tt0024633        |
| 1746582788        | 1939        | 1939        | Disbarred                       | Disbarred                       | Florey, Robert                     | Robert Florey         | tt0031232        |
| 1745357709        | 2009        | 2009        | The Messenger                   | The Messenger                   | Moverman, Oren                     | Oren Moverman         | tt0790712        |
| 1746565961        | 1956        | 1956        | Godzilla, King of the Monsters! | Godzilla, King of the Monsters! | Honda, Ishiro                      | Ishirô Honda          | tt0197521        |
| 1746492432        | 1945        | 1945        | Steppin' in Society             | Steppin' in Society             | Esway, Alexander                   | Alexander Esway       | tt0038118        |
| 1746571012        | 1952        | 1951        | Bright Victory                  | Bright Victory                  | Robson, Mark                       | Mark Robson           | tt0043361        |

|                   |             |             |                                 |                                 |                                    |                     |                  |
|-------------------|-------------|-------------|---------------------------------|---------------------------------|------------------------------------|---------------------|------------------|
| 1746233890        | 1967        | 1967        | Kill a Dragon                   | Kill a Dragon                   | Moore, Michael                     | Michael D. Moore    | tt0180781        |
| 1746573507        | 1932        | 1932        | Cynara                          | Cynara                          | Vidor, King                        | King Vidor          | tt0022796        |
| 1745357972        | 2004        | 2004        | Mean Creek                      | Mean Creek                      | Estes, Jacob Aaron                 | Jacob Estes         | tt0377091        |
| 1745340438        | 2001        | 2001        | Rock Star                       | Rock Star                       | Herek, Stephen                     | Stephen Herek       | tt0202470        |
| 1745357715        | 2002        | 2001        | Mean Machine                    | Mean Machine                    | Skolnick, Barry                    | Barry Skolnick      | tt0291341        |
| <b>1746578546</b> | <b>1960</b> | <b>1960</b> | <b>Girl of the Night</b>        | <b>Girl of the Night</b>        | <b>Cates, Joseph</b>               | <b>Joseph Cates</b> | <b>tt0053865</b> |
| 1746233899        | 1968        | 1968        | Vixen                           | Vixen!                          | Meyer, Russ                        | Russ Meyer          | tt0063787        |
| 1746569860        | 1958        | 1958        | God's Little Acre               | God's Little Acre               | Mann, Anthony                      | Anthony Mann        | tt0051666        |
| 1746578463        | 1960        | 1960        | The Plunderers                  | The Plunderers                  | Pevney, Joseph                     | Joseph Pevney       | tt0054190        |
| 1746487291        | 1919        | 1919        | Kitty Kelly, M.D.               | Kitty Kelly, M.D.               | Hickman, Howard                    | Howard C. Hickman   | tt0190509        |
| 1746578049        | 1936        | 1936        | Bengal Tiger                    | Bengal Tiger                    | King, Louis                        | Louis King          | tt0027349        |
| 1746420880        | 1997        | 1997        | The Relic                       | The Relic                       | Hyams, Peter                       | Peter Hyams         | tt0120004        |
| 1746569720        | 1954        | 1954        | Red Garters                     | Red Garters                     | Marshall, George; Leisen, Mitchell | George Marshall     | tt0047400        |
| 1746569751        | 1953        | 1953        | Small Town Girl                 | Small Town Girl                 | Kardos, Leslie                     | László Kardos       | tt0046330        |
| 1769971107        | 1969        | 1969        | Potpourri                       | Potpourri                       | Bush, Max                          | Max Bush II         | tt0255505        |
| 1746570295        | 1933        | 1933        | Sunset Pass                     | Sunset Pass                     | Hathaway, Henry                    | Henry Hathaway      | tt0024630        |
| 1746583915        | 1930        | 1930        | The Fighting Legion             | The Fighting Legion             | Brown, Harry J.                    | Harry Joe Brown     | tt0020882        |
| 1746424206        | 1941        | 1941        | Father's Son                    | Father's Son                    | Lederman, D. Ross                  | D. Ross Lederman    | tt0033593        |
| 1746571074        | 1933        | 1933        | Fog                             | Fog                             | Rogell, Albert                     | Albert S. Rogell    | tt0025128        |
| 1746420272        | 1940        | 1940        | He Married His Wife             | He Married His Wife             | Del Ruth, Roy                      | Roy Del Ruth        | tt0032575        |
| 1746514427        | 1915        | 1915        | A Fool There Was                | A Fool There Was                |                                    | Frank Powell        | tt0005339        |
| 1746435894        | 1989        | 1989        | Star Trek V: The Final Frontier | Star Trek V: The Final Frontier | Shatner, William                   | William Shatner     | tt0098382        |
| 1745393688        | 2008        | 2007        | Diary of the Dead               | Diary of the Dead               | Romero, George A.                  | George A. Romero    | tt0848557        |
| 1746453505        | 1944        | 1944        | The Sullivans                   | The Sullivans                   | Bacon, Lloyd                       | Lloyd Bacon         | tt0037323        |
| 1746574985        | 1933        | 1933        | Brief Moment                    | Brief Moment                    | Burton, David                      | David Burton        | tt0023842        |
| 1746454154        | 1997        | 1997        | Jackie Brown                    | Jackie Brown                    | Tarantino, Quentin                 | Quentin Tarantino   | tt0119396        |
| 1746508706        | 1925        | 1925        | The Woman Hater                 | The Woman Hater                 | Flood, James                       | James Flood         | tt0016547        |
| 1746454068        | 1942        | 1942        | Call Out the Marines            | Call Out the Marines            | Ryan, Frank; Hamilton, William     | William Hamilton    | tt0034567        |
| 1746514610        | 1910        | 1910        | The Queen of Hearts             | The Queen of Hearts             |                                    |                     | tt0221502        |
| 1746393520        | 1983        | 1983        | Chained Heat                    | Chained Heat                    | Nicolas, Paul                      | Paul Nicholas       | tt0085318        |
| 1746436983        | 1941        | 1941        | The Apache Kid                  | The Apache Kid                  | Sherman, George                    | George Sherman      | tt0033347        |
| 1746582836        | 1935        | 1935        | Shipmates Forever               | Shipmates Forever               | Borzage, Frank                     | Frank Borzage       | tt0026988        |
| 1746501556        | 1917        | 1917        | Because of a Woman              | Because of a Woman              | Conway, Jack                       | Jack Conway         | tt0007689        |
| 1746408708        | 1983        | 1983        | Heart Like a Wheel              | Heart Like a Wheel              | Kaplan, Jonathan                   | Jonathan Kaplan     | tt0085656        |
| 1746574727        | 1936        | 1936        | Night Waitress                  | Night Waitress                  | Landers, Lew                       | Lew Landers         | tt0028031        |
| 1745302600        | 2007        | 2007        | Death Sentence                  | Death Sentence                  | Wan, James                         | James Wan           | tt0804461        |
| 1746409124        | 1986        | 1986        | The Color of Money              | The Color of Money              | Scorsese, Martin                   | Martin Scorsese     | tt0090863        |
| 1746581149        | 1960        | 1960        | College Confidential            | College Confidential            | Zugsmith, Albert                   | Albert Zugsmith     | tt0053727        |
| 1746562431        | 1953        | 1953        | Little Boy Lost                 | Little Boy Lost                 | Seaton, George                     | George Seaton       | tt0046003        |
| 1746420514        | 1993        | 1993        | Fire in the Sky                 | Fire in the Sky                 | Lieberman, Robert                  | Robert Lieberman    | tt0106912        |
| 1746568204        | 1933        | 1933        | Mystery of the Wax Museum       | Mystery of the Wax Museum       | Curtiz, Michael                    | Michael Curtiz      | tt0024368        |
| 1745373746        | 2010        | 2010        | Please Give                     | Please Give                     | Holofcener, Nicole                 | Nicole Holofcener   | tt0878835        |
| 1746512890        | 1917        | 1917        | The Fibbers                     | The Fibbers                     | Wright, Fred E.                    | Fred E. Wright      | tt0007938        |
| 1746567591        | 1933        | 1933        | King of the Wild Horses         | King of the Wild Horses         | Haley, Earl                        | Earl Haley          | tt0196676        |
| 1746555857        | 1957        | 1957        | This Could Be the Night         | This Could Be the Night         | Wise, Robert                       | Robert Wise         | tt0051074        |
| 1746497565        | 1921        | 1921        | Cyclone Bliss                   | Cyclone Bliss                   | Ford, Francis                      | Francis Ford        | tt0012084        |
| 1746465307        | 1946        | 1946        | She Wrote the Book              | She Wrote the Book              | Lamont, Charles                    | Charles Lamont      | tt0038933        |
| 1746524071        | 1916        | 1916        | The Eye of God                  | The Eye of God                  | Weber, Lois; Smalley, Phillips     | Phillips Smalley    | tt0006643        |
| 1746511753        | 1915        | 1915        | The Cowardly Way                | The Cowardly Way                | Ince, John                         | John Ince           | tt0005150        |
| 1769971145        | 1969        | 1969        | A Couple of Trouble             | A Couple of Trouble             |                                    | Nick Millard        | tt0325201        |
| 1746235266        | 1972        | 1972        | The Other                       | The Other                       | Mulligan, Robert                   | Robert Mulligan     | tt0069050        |
| 1769969370        | 1965        | 1965        | The Wonderful World of Girls    | The Wonderful World of Girls    | Stootsberry, Arthur                | Peter Perry Jr.     | tt0153910        |
| 1746424212        | 1943        | 1943        | Appointment in Berlin           | Appointment in Berlin           | Green, Alfred E.                   | Alfred E. Green     | tt0035643        |
| 1746409495        | 1985        | 1985        | Trouble in Mind                 | Trouble in Mind                 | Rudolph, Alan                      | Alan Rudolph        | tt0090209        |
| 1745303024        | 2007        | 2007        | Are We Done Yet?                | Are We Done Yet?                | Carr, Steve                        | Steve Carr          | tt0422774        |
| 1746465217        | 1945        | 1945        | Doll Face                       | Doll Face                       | Seiler, Lewis                      | Lewis Seiler        | tt0037650        |
| 1746520466        | 1927        | 1927        | Tracked by the Police           | Tracked by the Police           | Enright, Ray                       | Ray Enright         | tt0018501        |

|            |      |      |                                |                                |                                   |                         |           |
|------------|------|------|--------------------------------|--------------------------------|-----------------------------------|-------------------------|-----------|
| 1746392956 | 1983 | 1983 | Trading Places                 | Trading Places                 | Landis, John                      | John Landis             | tt0086465 |
| 1746582792 | 1935 | 1935 | So Red the Rose                | So Red the Rose                | Vidor, King                       | King Vidor              | tt0027018 |
| 1746421185 | 1996 | 1996 | Chain Reaction                 | Chain Reaction                 | Davis, Andrew                     | Andrew Davis            | tt0115857 |
| 1746582317 | 1951 | 1951 | Jungle Manhunt                 | Jungle Manhunt                 | Landers, Lew                      | Lew Landers             | tt0043694 |
| 1746573374 | 1932 | 1932 | The Docks of San Francisco     | Docks of San Francisco         | Seitz, George B.                  | George B. Seitz         | tt0022826 |
| 1746566106 | 1955 | 1955 | Shack Out on 101               | Shack Out on 101               | Dein, Edward                      | Edward Dein             | tt0048607 |
| 1746438797 | 2000 | 2000 | Erin Brockovich                | Erin Brockovich                | Soderbergh, Steven                | Steven Soderbergh       | tt0195685 |
| 1746583196 | 1929 | 1929 | Sweetie                        | Sweetie                        | Tuttle, Frank                     | Frank Tuttle            | tt0020469 |
| 1746580688 | 1935 | 1935 | Go into Your Dance             | Go Into Your Dance             | Mayo, Archie L.                   | Archie Mayo             | tt0026418 |
| 1746570435 | 1934 | 1934 | Inside Information             | Inside Information             | Hill, Robert F.                   | Robert F. Hill          | tt0025309 |
| 1746580840 | 1938 | 1938 | That Certain Age               | That Certain Age               | Ludwig, Edward                    | Edward Ludwig           | tt0030854 |
| 1746436701 | 1941 | 1941 | Maisie Was a Lady              | Maisie Was a Lady              | Marin, Edwin L.                   | Edwin L. Marin          | tt0033867 |
| 1746520368 | 1949 | 1949 | Brand of Fear                  | Brand of Fear                  | Drake, Oliver                     | Oliver Drake            | tt0041205 |
| 1745282860 | 2006 | 2006 | Abominable                     | Abominable                     | Schiffrin, Ryan                   | Ryan Schiffrin          | tt0402743 |
| 1746513796 | 1916 | 1916 | Macbeth                        | Macbeth                        | Emerson, John                     | John Emerson            | tt0006995 |
| 1746580444 | 1935 | 1935 | Personal Maid's Secret         | Personal Maid's Secret         | Collins, Arthur Greville          | Arthur Greville Collins | tt0026865 |
| 1746524232 | 1917 | 1917 | The Gates of Doom              | The Gates of Doom              | Swickard, Charles                 | Charles Swickard        | tt0007989 |
| 1746577646 | 1936 | 1936 | 36 Hours to Kill               | 36 Hours to Kill               | Forde, Eugene                     | Eugene Forde            | tt0027247 |
| 1746582646 | 1936 | 1936 | Santa Fe Bound                 | Santa Fe Bound                 | Samuels, Henri                    | Harry S. Webb           | tt0028218 |
| 1746584401 | 1939 | 1938 | The Last Warning               | The Last Warning               | Rogell, Al                        | Albert S. Rogell        | tt0030347 |
| 1746393153 | 1984 | 1984 | Dreamscape                     | Dreamscape                     | Ruben, Joseph                     | Joseph Ruben            | tt0087175 |
| 1746497022 | 1918 | 1918 | Her Man                        | Her Man                        | Ince, Ralph W.; Ince, John E.     | John Ince               | tt0009166 |
| 1745374161 | 2004 | 2004 | Beyond the Sea                 | Beyond the Sea                 | Spacey, Kevin                     | Kevin Spacey            | tt0363473 |
| 1746438282 | 1942 | 1942 | A Yank at Eton                 | A Yank at Eton                 | Taurog, Norman                    | Norman Taurog           | tt0035572 |
| 1746503028 | 1917 | 1917 | The Heart of Ezra Greer        | The Heart of Ezra Greer        | Chautard, Emile                   | Emile Chautard          | tt0008059 |
| 1746474947 | 1948 | 1948 | The Mating of Millie           | The Mating of Millie           | Levin, Henry                      | Henry Levin             | tt0040577 |
| 1746500112 | 1946 | 1946 | Overland Riders                | Overland Riders                | Newfield, Sam                     | Sam Newfield            | tt0038820 |
| 1745374026 | 2003 | 2003 | Ghosts of the Abyss            | Ghosts of the Abyss            | Cameron, James                    | James Cameron           | tt0297144 |
| 1746583018 | 1940 | 1940 | Nobody's Children              | Nobody's Children              | Barton, Charles                   | Charles Barton          | tt0032848 |
| 1746569688 | 1958 | 1958 | The Party Crashers             | The Party Crashers             | Girard, Bernard                   | Bernard Girard          | tt0052049 |
| 1746573079 | 1931 | 1931 | The Last Flight                | The Last Flight                | Dieterle, William                 | William Dieterle        | tt0022054 |
| 1746500538 | 1925 | 1925 | The King on Main Street        | The King on Main Street        | Bell, Monta                       | Monta Bell              | tt0015976 |
| 1746584286 | 1934 | 1934 | The Poor Rich                  | The Poor Rich                  | Sedgwick, Edward                  | Edward Sedgwick         | tt0025666 |
| 1746583367 | 1929 | 1929 | Fighters of the Saddle         | Fighters of the Saddle         |                                   | Robert J. Horner        | tt0019878 |
| 1745372642 | 2004 | 2004 | Barbershop 2: Back in Business | Barbershop 2: Back in Business | Sullivan, Kevin Rodney            | Kevin Rodney Sullivan   | tt0337579 |
| 1745293524 | 2005 | 2004 | Gunner Palace                  | Gunner Palace                  | Tucker, Michael; Epperlein, Petra | Petra Epperlein         | tt0424129 |
| 1746567783 | 1932 | 1932 | Over the Seven Seas            | Over the Seven Seas            |                                   |                         | tt3836968 |
| 1746578434 | 1962 | 1962 | Rider on a Dead Horse          | Rider on a Dead Horse          | Strock, Herbert L.                | Herbert L. Strock       | tt0056413 |
| 1746487848 | 1919 | 1919 | The Pagan God                  | The Pagan God                  | Frame, Park                       | Park Frame              | tt0010546 |
| 1746424461 | 1943 | 1943 | The More the Merrier           | The More the Merrier           | Stevens, George                   | George Stevens          | tt0036172 |
| 1746573934 | 1959 | 1958 | The Black Orchid               | The Black Orchid               | Ritt, Martin                      | Martin Ritt             | tt0052631 |
| 1746410407 | 1992 | 1992 | Basic Instinct                 | Basic Instinct                 | Verhoeven, Paul                   | Paul Verhoeven          | tt0103772 |
| 1746553945 | 1964 | 1964 | Everybody Loves It             | Everybody Loves It             |                                   | Phillip Mark            | tt0233670 |
| 1746503413 | 1920 | 1920 | The Scrap of Paper             | The Scrap of Paper             | Collins, Tom                      | Tom Collins             | tt0011665 |
| 1746438195 | 1941 | 1941 | Criminals Within               | Criminals Within               | Lewis, Joseph                     | Joseph H. Lewis         | tt0033500 |
| 1746514455 | 1915 | 1915 | The College Orphan             | The College Orphan             | Dowlan, William C.                | William C. Dowlan       | tt0005105 |
| 1746424209 | 1941 | 1941 | The Saint in Palm Springs      | The Saint in Palm Springs      | Hively, Jack                      | Jack Hively             | tt0034145 |
| 1746508100 | 1927 | 1927 | The Show                       | The Show                       | Browning, Tod                     | Tod Browning            | tt0018397 |
| 1746453598 | 1941 | 1941 | Desert Bandit                  | Desert Bandit                  | Sherman, George                   | George Sherman          | tt0033524 |
| 1746514707 | 1914 | 1914 | The Coming Power               | The Coming Power               | MacKay, Edward                    | Edward MacKay           | tt0003790 |
| 1745303192 | 2007 | 2006 | Outsourced                     | Outsourced                     | Jeffcoat, John                    | John Jeffcoat           | tt0425326 |
| 1746464933 | 1941 | 1941 | Out of the Fog                 | Out of the Fog                 | Litvak, Anatole                   | Anatole Litvak          | tt0033987 |
| 1746520645 | 1925 | 1925 | White Fang                     | White Fang                     | Trimble, Lawrence                 | Laurence Trimble        | tt0016524 |
| 1746574893 | 1934 | 1934 | House of Danger                | House of Danger                | Hutchinson, Charles               | Charles Hutchison       | tt0165317 |
| 1746520089 | 1926 | 1926 | Unknown Treasures              | Unknown Treasures              | Mayo, Archie                      | Archie Mayo             | tt0017503 |
| 1746422833 | 1940 | 1940 | Young People                   | Young People                   | Dwan, Allan                       | Allan Dwan              | tt0033288 |
| 1746421601 | 1940 | 1940 | The Lone Wolf Strikes          | The Lone Wolf Strikes          | Salkow, Sidney                    | Sidney Salkow           | tt0032726 |

|            |      |      |                               |                               |                       |                     |           |
|------------|------|------|-------------------------------|-------------------------------|-----------------------|---------------------|-----------|
| 1746503358 | 1918 | 1918 | The Silent Woman              | The Silent Woman              | Blaché, Herbert       | Herbert Blaché      | tt0009618 |
| 1746438305 | 1940 | 1940 | Double Alibi                  | Double Alibi                  | Rosen, Philip         | Phil Rosen          | tt0032409 |
| 1746487837 | 1920 | 1920 | The Chamber Mystery           | The Chamber Mystery           | Schomer, Abraham      | Abraham S. Schomer  | tt0188493 |
| 1745358695 | 2010 | 2009 | The Joneses                   | The Joneses                   | Borte, Derrick        | Derrick Borte       | tt1285309 |
| 1746584188 | 1940 | 1940 | No Time for Comedy            | No Time for Comedy            | Keighley, William     | William Keighley    | tt0032846 |
| 1746435853 | 1998 | 1998 | The Mask of Zorro             | The Mask of Zorro             | Campbell, Martin      | Martin Campbell     | tt0120746 |
| 1746512446 | 1915 | 1915 | Jim the Penman                | Jim the Penman                | Porter, Edwin S.      | Edwin S. Porter     | tt0005570 |
| 1746574782 | 1934 | 1934 | The Hell Cat                  | The Hell Cat                  | Rogell, Albert        | Albert S. Rogell    | tt0025232 |
| 1746584145 | 1940 | 1940 | His Girl Friday               | His Girl Friday               | Hawks, Howard         | Howard Hawks        | tt0032599 |
| 1746497507 | 1920 | 1920 | The Inner Voice               | The Inner Voice               | Neill, R. William     | Roy William Neill   | tt0011333 |
| 1746569946 | 1956 | 1956 | The She-Creature              | The She Creature              | Cahn, Edward L.       | Edward L. Cahn      | tt0050957 |
| 1746574946 | 1938 | 1938 | A Slight Case of Murder       | A Slight Case of Murder       | Bacon, Lloyd          | Lloyd Bacon         | tt0030764 |
| 1746581789 | 1928 | 1928 | Hell Ship Bronson             | Hellship Bronson              | Henabery, Joseph E.   | Joseph Henabery     | tt0018992 |
| 1746454190 | 1998 | 1998 | Great Expectations            | Great Expectations            | Cuarón, Alfonso       | Alfonso Cuarón      | tt0119223 |
| 1746503691 | 1922 | 1923 | The Love Nest                 | The Love Nest                 | Physioc, Wray         | Buster Keaton       | tt0014218 |
| 1746453600 | 1941 | 1941 | The Masked Rider              | The Masked Rider              | Beebe, Ford           | Ford Beebe          | tt0033887 |
| 1746515373 | 1921 | 1921 | All's Fair in Love            | All's Fair in Love            | Hopper, E. Mason      | E. Mason Hopper     | tt0011919 |
| 1746492701 | 1948 | 1948 | An Act of Murder              | An Act of Murder              | Gordon, Michael       | Michael Gordon      | tt0040072 |
| 1746533050 | 1915 | 1915 | The Isle of Content           | The Isle of Content           | Nichols, George       | George Nichols      | tt0005555 |
| 1746575801 | 1910 | 1910 | Faith Lost and Won            | Faith Lost and Won            |                       |                     | tt1810599 |
| 1746515791 | 1919 | 1919 | The Lost Battalion            | The Lost Battalion            | King, Burton          | Burton L. King      | tt0010386 |
| 1746530789 | 1949 | 1949 | An Old-Fashioned Girl         | An Old Fashioned Girl         | Dreifuss, Arthur      | Arthur Dreifuss     | tt0130153 |
| 1746566095 | 1956 | 1956 | Girls in Prison               | Girls in Prison               | Cahn, Edward L.       | Edward L. Cahn      | tt0049265 |
| 1746577932 | 1935 | 1935 | Black Sheep                   | Black Sheep                   | Dwan, Allan           | Allan Dwan          | tt0026124 |
| 1746512381 | 1916 | 1916 | That Sort                     | That Sort                     | Brabin, Charles J.    | Charles Brabin      | tt0159018 |
| 1746566100 | 1953 | 1953 | The Sword and the Rose        | The Sword and the Rose        | Annakin, Ken          | Ken Annakin         | tt0046387 |
| 1746218167 | 1966 | 1966 | Munster, Go Home!             | Munster, Go Home!             | Bellamy, Earl         | Earl Bellamy        | tt0060726 |
| 1746439134 | 1941 | 1941 | The Men in Her Life           | The Men in Her Life           | Ratoff, Gregory       | Gregory Ratoff      | tt0033900 |
| 1746582110 | 1928 | 1928 | Rainbow Range                 | Rainbow Range                 |                       | Cheyenne Bill       | tt0020309 |
| 1746465318 | 1945 | 1945 | Murder, He Says               | Murder, He Says               | Marshall, George      | George Marshall     | tt0037931 |
| 1746501858 | 1916 | 1916 | The Storm                     | The Storm                     | Reicher, Frank        | Frank Reicher       | tt0007398 |
| 1769970747 | 1912 | 1912 | The Kid and the Sleuth        | The Kid and the Sleuth        |                       | Thomas H. Ince      | tt0039254 |
| 1746509012 | 1950 | 1950 | Broken Arrow                  | Broken Arrow                  | Daves, Delmer         | Delmer Daves        | tt0042286 |
| 1746453537 | 1941 | 1941 | Top Sergeant Mulligan         | Top Sergeant Mulligan         | Yarbrough, Jean       | Jean Yarbrough      | tt0034302 |
| 1746577391 | 1961 | 1961 | The Steel Claw                | The Steel Claw                | Montgomery, George    | George Montgomery   | tt0055479 |
| 1746571009 | 1952 | 1952 | Scarlet Angel                 | Scarlet Angel                 | Salkow, Sidney        | Sidney Salkow       | tt0045126 |
| 1746571893 | 1932 | 1932 | Daring Danger                 | Daring Danger                 | Lederman, D. Ross     | D. Ross Lederman    | tt0022801 |
| 1746465175 | 1947 | 1948 | Sunset Carson Rides Again     | Sunset Carson Rides Again     | Drake, Oliver         | Oliver Drake        | tt0040851 |
| 1746509297 | 1926 | 1926 | The Enchanted Hill            | The Enchanted Hill            | Willat, Irvin         | Irvin Willat        | tt0016823 |
| 1746424191 | 1941 | 1941 | Mr. and Mrs. Smith            | Mr. & Mrs. Smith              | Hitchcock, Alfred     | Alfred Hitchcock    | tt0033922 |
| 1746523059 | 1923 | 1923 | Defying Destiny               | Defying Destiny               | Chaudet, Louis        | Louis Chaudet       | tt0013981 |
| 1746578377 | 1950 | 1950 | Under My Skin                 | Under My Skin                 | Negulesco, Jean       | Jean Negulesco      | tt0042005 |
| 1746586161 | 1939 | 1939 | Fast and Loose                | Fast and Loose                | Marin, Edwin L.       | Edwin L. Marin      | tt0031299 |
| 1746520758 | 1950 | 1949 | Malaya                        | Malaya                        | Thorpe, Richard       | Richard Thorpe      | tt0041622 |
| 1745293698 | 2007 | 2007 | Charlie Wilson's War          | Charlie Wilson's War          | Nichols, Mike         | Mike Nichols        | tt0472062 |
| 1746582535 | 1939 | 1939 | Blondie Meets the Boss        | Blondie Meets the Boss        | Strayer, Frank R.     | Frank R. Strayer    | tt0031107 |
| 1746465304 | 1944 | 1944 | They Live in Fear             | They Live in Fear             | Berne, Josef          | Josef Berne         | tt0037364 |
| 1746578949 | 1961 | 1962 | Journey to the Seventh Planet | Journey to the Seventh Planet | Pink, Sidney          | Sidney W. Pink      | tt0056127 |
| 1746508462 | 1924 | 1924 | Cyclone Buddy                 | Cyclone Buddy                 | Neitz, Alvin J.       | Alan James          | tt0014814 |
| 1746583819 | 1930 | 1930 | Headin' North                 | Headin' North                 | McCarthy, J. P.       | John P. McCarthy    | tt0020955 |
| 1746499981 | 1924 | 1924 | Greater Than Marriage         | Greater Than Marriage         | Halperin, Victor Hugo | Victor Halperin     | tt0014957 |
| 1746491971 | 1946 | 1946 | Blonde Alibi                  | Blonde Alibi                  | Jason, Will           | Will Jason          | tt0038364 |
| 1745357908 | 2001 | 2001 | Joe Dirt                      | Joe Dirt                      | Gordon, Dennie        | Dennie Gordon       | tt0245686 |
| 1745359419 | 2008 | 2008 | Changeling                    | Changeling                    | Eastwood, Clint       | Clint Eastwood      | tt0824747 |
| 1746581253 | 1950 | 1950 | Jungle Stampede               | Jungle Stampede               | Breakston, George     | George P. Breakston | tt0042624 |
| 1746503098 | 1916 | 1916 | Boots and Saddles             | Boots and Saddles             |                       |                     | tt0157421 |
| 1746568266 | 1934 | 1933 | Gallant Lady                  | Gallant Lady                  | La Cava, Gregory      | Gregory La Cava     | tt0024046 |

|            |      |      |                            |                            |                                   |                     |           |
|------------|------|------|----------------------------|----------------------------|-----------------------------------|---------------------|-----------|
| 1746577196 | 1963 | 1963 | Gone Are the Days!         | Gone Are the Days!         | Webster, Nicholas                 | Nicholas Webster    | tt0057112 |
| 1769974236 | 1970 | 1969 | The Corporate Queen        | The Corporate Queen        | Amero, John; Amero, Lem           | John Amero          | tt0172268 |
| 1746438218 | 1944 | 1944 | Can't Help Singing         | Can't Help Singing         | Ryan, Frank                       | Frank Ryan          | tt0036692 |
| 1746487127 | 1919 | 1919 | The Miracle of Love        | The Miracle of Love        | Leonard, Robert Z.                | Robert Z. Leonard   | tt0010467 |
| 1746515661 | 1920 | 1920 | The Jack-Knife Man         | The Jack-Knife Man         | Vidor, King                       | King Vidor          | tt0011344 |
| 1746453549 | 1944 | 1944 | The Unwritten Code         | The Unwritten Code         | Rotsten, Herman; Wilmot, Robert   | Herman Rotsten      | tt0037419 |
| 1746435872 | 1999 | 1999 | The End of the Affair      | The End of the Affair      | Jordan, Neil                      | Neil Jordan         | tt0172396 |
| 1746585078 | 1930 | 1930 | Sea Legs                   | Sea Legs                   | Heerman, Victor                   | Victor Heerman      | tt0021347 |
| 1746524121 | 1927 | 1927 | The Border Cavalier        | The Border Cavalier        | Wylar, William                    | William Wylar       | tt0017692 |
| 1746570171 | 1952 | 1952 | The Fighter                | The Fighter                | Kline, Herbert                    | Herbert Kline       | tt0044614 |
| 1769970753 | 1911 | 1911 | The Opium Smuggler         | The Opium Smuggler         |                                   | Allan Dwan          | tt0358618 |
| 1746532829 | 1916 | 1916 | Love's Lariat              | Love's Lariat              | Marshall, George E.; Carey, Harry | Harry Carey         | tt0006956 |
| 1746435123 | 1943 | 1943 | The Leopard Man            | The Leopard Man            | Tourneur, Jacques                 | Jacques Tourneur    | tt0036104 |
| 1746504072 | 1917 | 1918 | A Soul for Sale            | A Soul for Sale            | Holubar, Allen J.                 | Allen Holubar       | tt0009634 |
| 1746503685 | 1919 | 1919 | The Crimson Gardenia       | The Crimson Gardenia       | Barker, Reginald                  | Reginald Barker     | tt0010032 |
| 1746486253 | 1918 | 1918 | My Unmarried Wife          | My Unmarried Wife          | Siegmann, George A.               | George Siegmann     | tt0008346 |
| 1746584152 | 1939 | 1939 | Cowboys from Texas         | Cowboys from Texas         | Sherman, George                   | George Sherman      | tt0031189 |
| 1746566014 | 1958 | 1958 | Queen of Outer Space       | Queen of Outer Space       | Bernds, Edward                    | Edward Berndts      | tt0052104 |
| 1746500733 | 1925 | 1925 | The Perfect Clown          | The Perfect Clown          | Newmeyer, Fred                    | Fred C. Newmeyer    | tt0016212 |
| 1746520678 | 1949 | 1949 | The Red Pony               | The Red Pony               | Milestone, Lewis                  | Lewis Milestone     | tt0041792 |
| 1746525102 | 1920 | 1919 | Dangerous Hours            | Dangerous Hours            | Niblo, Fred                       | Fred Niblo          | tt0010045 |
| 1746508120 | 1925 | 1925 | The Man From Lone Mountain | The Man from Lone Mountain | Wilson, Ben                       | Ben F. Wilson       | tt0016080 |
| 1746497528 | 1921 | 1921 | The Beautiful Gambler      | The Beautiful Gambler      | Worthington, William              | William Worthington | tt0011954 |
| 1746584123 | 1935 | 1935 | Hi, Gaucho!                | Hi, Gaucho!                | Atkins, Tommy                     | Thomas Atkins       | tt0027739 |
| 1746577684 | 1933 | 1933 | Rustlers' Roundup          | The Rustler's Roundup      | MacRae, Henry                     | Henry MacRae        | tt0024511 |
| 1746574625 | 1934 | 1934 | Romance in the Rain        | Romance in the Rain        | Walker, Stuart                    | Stuart Walker       | tt0025732 |
| 1746574997 | 1936 | 1935 | The Bride Comes Home       | The Bride Comes Home       | Ruggles, Wesley                   | Wesley Ruggles      | tt0026137 |
| 1746578022 | 1938 | 1938 | Comet over Broadway        | Comet Over Broadway        | Berkeley, Busby                   | Busby Berkeley      | tt0030007 |
| 1746514956 | 1923 | 1923 | The Pilgrim                | The Pilgrim                | Chaplin, Charles                  | Charles Chaplin     | tt0014358 |
| 1746574562 | 1936 | 1936 | The Bold Caballero         | The Bold Caballero         | Root, Wells                       | Wells Root          | tt0027377 |
| 1746578900 | 1958 | 1958 | Bullwhip                   | Bullwhip                   | Jones, Harmon                     | Harmon Jones        | tt0051438 |
| 1746574071 | 1962 | 1962 | The Pigeon That Took Rome  | The Pigeon That Took Rome  | Shavelson, Melville               | Melville Shavelson  | tt0056349 |
| 1746583334 | 1930 | 1930 | Trailin' Trouble           | Trailing Trouble           | Rosson, Arthur                    | Arthur Rosson       | tt0021488 |
| 1746514809 | 1916 | 1916 | The Sealskin Coat          | The Sealskin Coat          | Ellis, Robert                     | Robert Ellis        | tt3155444 |
| 1746555536 | 1956 | 1956 | Scandal Incorporated       | Scandal Incorporated       | Mann, Edward                      | Edward Mann         | tt0190738 |
| 1746500281 | 1926 | 1926 | Take It From Me            | Take It from Me            | Seiter, William A.                | William A. Seiter   | tt0017447 |
| 1746439136 | 1944 | 1944 | Murder, My Sweet           | Murder, My Sweet           | Dmytryk, Edward                   | Edward Dmytryk      | tt0037101 |
| 1746508951 | 1949 | 1949 | Manhandled                 | Manhandled                 | Foster, Lewis R.                  | Lewis R. Foster     | tt0041631 |
| 1746543081 | 1915 | 1915 | Alice in Wonderland        | Alice in Wonderland        | Young, W. W.                      | W.W. Young          | tt0004873 |
| 1746211500 | 1974 | 1974 | The Manhandlers            | The Manhandlers            | Madden, Lee                       | Lee Madden          | tt0128326 |
| 1746393213 | 1981 | 1981 | Stripes                    | Stripes                    | Reitman, Ivan                     | Ivan Reitman        | tt0083131 |
| 1746583118 | 1940 | 1940 | The Return of Frank James  | The Return of Frank James  | Lang, Fritz                       | Fritz Lang          | tt0032983 |
| 1746520061 | 1927 | 1927 | The Satin Woman            | The Satin Woman            | Lang, Walter                      | Walter Lang         | tt0018359 |
| 1746513409 | 1915 | 1915 | The Waif                   | The Waif                   | Roubert, William                  | William L. Roubert  | tt0006237 |
| 1745375181 | 2009 | 2009 | Blind Date                 | Blind Fate                 | Tucci, Stanley                    | Tayfun Senturk      | tt1326740 |
| 1746542657 | 1926 | 1926 | Rustlers' Ranch            | Rustlers' Ranch            | Smith, Clifford S.                | Clifford Smith      | tt0017341 |
| 1746568166 | 1952 | 1952 | Old Oklahoma Plains        | Old Oklahoma Plains        | Witney, William                   | William Witney      | tt0044990 |
| 1746217162 | 1968 | 1968 | The Pink Jungle            | The Pink Jungle            | Mann, Delbert                     | Delbert Mann        | tt0063429 |
| 1746581240 | 1962 | 1962 | Third of a Man             | Third of a Man             | Lewin, Robert                     | Robert Lewin        | tt0056577 |
| 1746549946 | 1954 | 1954 | Hell's Half Acre           | Hell's Half Acre           | Auer, John H.                     | John H. Auer        | tt0047074 |
| 1746561360 | 1932 | 1932 | As You Desire Me           | As You Desire Me           | Fitzmaurice, George               | George Fitzmaurice  | tt0022641 |
| 1746454123 | 1999 | 1999 | The Haunting               | The Haunting               | de Bont, Jan                      | Jan de Bont         | tt0171363 |
| 1746436982 | 1943 | 1943 | Someone to Remember        | Someone to Remember        | Siodmak, Robert                   | Robert Siodmak      | tt0036374 |
| 1746554788 | 1956 | 1956 | Edge of Hell               | Edge of Hell               | Haas, Hugo                        | Hugo Haas           | tt0049171 |
| 1746416015 | 1917 | 1917 | The Image Maker            | The Image Maker            | Moore, Eugene                     | Eugene Moore        | tt0176842 |
| 1745340161 | 2003 | 2003 | All the Real Girls         | All the Real Girls         | Green, David Gordon               | David Gordon Green  | tt0299458 |
| 1746487299 | 1921 | 1921 | Not Guilty                 | Not Guilty                 | Franklin, Sidney A.               | Sidney Franklin     | tt0012510 |

|            |      |      |                            |                            |                                   |                                     |           |
|------------|------|------|----------------------------|----------------------------|-----------------------------------|-------------------------------------|-----------|
| 1769970592 | 1966 | 1966 | Mondo Oscenità             | Mondo oscenità             | Mawra, Joseph P.; Scappine, Carlo | Joseph P. Mawra                     | tt0251854 |
| 1746499850 | 1946 | 1946 | The Stranger               | The Stranger               | Welles, Orson                     | Orson Welles                        | tt0038991 |
| 1746570110 | 1934 | 1934 | I Hate Women               | I Hate Women               | Scotto, Aubrey H.                 | Aubrey Scotto                       | tt0025282 |
| 1746514662 | 1923 | 1923 | The Buster                 | The Busher                 | Campbell, Colin                   | Jack White                          | tt0423883 |
| 1746515738 | 1922 | 1922 | The Woman He Married       | The Woman He Married       | Niblo, Fred                       | Fred Niblo                          | tt0013780 |
| 1745309543 | 2004 | 2004 | The Terminal               | The Terminal               | Spielberg, Steven                 | Steven Spielberg                    | tt0362227 |
| 1746585485 | 1939 | 1939 | The Marshal of Mesa City   | The Marshal of Mesa City   | Howard, David                     | David Howard                        | tt0031630 |
| 1746410415 | 1991 | 1991 | The Borrower               | The Borrower               | McNaughton, John                  | John McNaughton                     | tt0101502 |
| 1746532852 | 1916 | 1916 | Her Bleeding Heart         | Her Bleeding Heart         | Pratt, Jack                       | Jack Pratt                          | tt0157744 |
| 1745293293 | 2006 | 2006 | Surf School                | Surf School                | Silverman, Joel                   | Joel Silverman                      | tt0456014 |
| 1746574742 | 1933 | 1933 | The Last Trail             | The Last Trail             | Tinling, James                    | James Tinling                       | tt0024243 |
| 1746520860 | 1925 | 1925 | The Unholy Three           | The Unholy Three           | Browning, Tod                     | Tod Browning                        | tt0016473 |
| 1746464947 | 1947 | 1947 | Ridin' Down the Trail      | Ridin' Down the Trail      | Bretherton, Howard                | Howard Bretherton                   | tt0039770 |
| 1746575056 | 1933 | 1933 | Fighting Texans            | Fighting Texans            | Schaefer, Armand                  | Armand Schaefer                     | tt0024011 |
| 1746453480 | 1943 | 1943 | The Texas Kid              | The Texas Kid              | Hillyer, Lambert                  | Lambert Hillyer                     | tt0036421 |
| 1746423320 | 1990 | 1990 | Graffiti Bridge            | Graffiti Bridge            | Prince                            | Prince                              | tt0099691 |
| 1746570446 | 1934 | 1934 | I Am a Thief               | I Am a Thief               | Florey, Robert                    | Robert Florey                       | tt0026505 |
| 1746520143 | 1927 | 1927 | Once and Forever           | Once and Forever           | Stone, Phil                       | Phil Goldstone                      | tt0018223 |
| 1746421564 | 1993 | 1993 | Look Who's Talking Now     | Look Who's Talking Now     | Ropelewski, Tom                   | Tom Ropelewski                      | tt0107438 |
| 1746438511 | 1999 | 1999 | Detroit Rock City          | Detroit Rock City          | Rifkin, Adam                      | Adam Rifkin                         | tt0165710 |
| 1746574371 | 1951 | 1951 | Hills of Utah              | The Hills of Utah          | English, John                     | John English                        | tt0043641 |
| 1746569746 | 1958 | 1958 | In the Money               | In the Money               | Beaudine, William                 | William Beaudine                    | tt0051771 |
| 1746394385 | 1984 | 1984 | Weekend Pass               | Weekend Pass               | Bassoff, Lawrence                 | Lawrence Bassoff                    | tt0088385 |
| 1746580560 | 1934 | 1934 | Search for Beauty          | Search for Beauty          | Kenton, Erle C.                   | Erle C. Kenton                      | tt0025755 |
| 1769970400 | 1966 | 1966 | The Sensualist             | The Sensualist             | Emanuel, Aram                     | Peter Emmanuel Goldman              | tt0257132 |
| 1746545209 | 1940 | 1940 | Frontier Vengeance         | Frontier Vengeance         | Watt, Nate                        | Nate Watt                           | tt0031348 |
| 1746491796 | 1946 | 1946 | The Man Who Dared          | The Man Who Dared          | Sturges, John                     | John Sturges                        | tt0038722 |
| 1746217577 | 1967 | 1967 | Africa—Texas Style!        | Africa—Texas Style         | Marton, Andrew                    | Andrew Marton                       | tt0061334 |
| 1746454657 | 1946 | 1946 | The Diary of a Chambermaid | The Diary of a Chambermaid | Renoir, Jean                      | Jean Renoir                         | tt0038477 |
| 1746585328 | 1930 | 1930 | Party Girl                 | Party Girl                 | Hale, Rex                         | Victor Halperin                     | tt0021239 |
| 1746577902 | 1937 | 1937 | The Luck of Roaring Camp   | The Luck of Roaring Camp   | Willat, Irvin                     | Irvin Willat                        | tt0029174 |
| 1746573046 | 1910 | 1910 | The Cowboy's Sweetheart    | The Cowboy's Sweetheart    |                                   | Gilbert M. 'Broncho Billy' Anderson | tt0001169 |
| 1746438463 | 1941 | 1941 | Outlaws of the Rio Grande  | Outlaws of the Rio Grande  | Stewart, Peter                    | Sam Newfield                        | tt0033991 |
| 1745393790 | 2010 | 2010 | Marmaduke                  | Marmaduke                  | Dey, Tom                          | Tom Dey                             | tt1392197 |
| 1746582496 | 1938 | 1938 | Always Goodbye             | Always Goodbye             | Lanfield, Sidney                  | Sidney Lanfield                     | tt0029861 |
| 1746501651 | 1910 | 1910 | The Rosary                 | The Rosary                 |                                   | Harry Solter                        | tt0329554 |
| 1746583373 | 1930 | 1930 | The Canyon of Missing Men  | The Canyon of Missing Men  | McGowan, J. P.                    | J.P. McGowan                        | tt0020737 |
| 1746509362 | 1923 | 1923 | Grumpy                     | Grumpy                     | de Mille, William                 | William C. de Mille                 | tt0014103 |
| 1746571075 | 1934 | 1934 | Crime Doctor               | The Crime Doctor           | Robertson, John                   | John S. Robertson                   | tt0025008 |
| 1746513579 | 1914 | 1914 | The Envoy Extraordinary    | The Envoy Extraordinary    | Johnston, Lorimer                 | Lorimer Johnston                    | tt0003888 |
| 1746582442 | 1939 | 1939 | Nancy Drew, Reporter       | Nancy Drew... Reporter     | Clemens, William                  | William Clemens                     | tt0031709 |
| 1746583662 | 1931 | 1931 | Huckleberry Finn           | Huckleberry Finn           | Taugog, Norman                    | Norman Taugog                       | tt0021981 |
| 1746499939 | 1948 | 1948 | The Return of Wildfire     | The Return of Wildfire     | Taylor, Ray                       | Ray Taylor                          | tt0040731 |
| 1746555075 | 1957 | 1957 | The Hard Man               | The Hard Man               | Sherman, George                   | George Sherman                      | tt0050485 |
| 1746583826 | 1931 | 1931 | God's Country and the Man  | God's Country and the Man  | McCarthy, J. P.                   | John P. McCarthy                    | tt0021916 |
| 1746500926 | 1917 | 1917 | Shame                      | Shame                      | Noble, John W.                    | John W. Noble                       | tt0182418 |
| 1746500229 | 1946 | 1946 | Specter of the Rose        | Specter of the Rose        | Hecht, Ben                        | Ben Hecht                           | tt0038973 |
| 1746574144 | 1962 | 1962 | The Small Hours            | The Small Hours            | Chaitin, Norman C.                | Norman C. Chaitin                   | tt0258169 |
| 1746492458 | 1946 | 1946 | Border Bandits             | Border Bandits             | Hillyer, Lambert                  | Lambert Hillyer                     | tt0038375 |
| 1746583916 | 1931 | 1931 | The Lawless Woman          | The Lawless Woman          | Thorpe, Richard                   | Richard Thorpe                      | tt0022062 |
| 1746476201 | 1947 | 1947 | Carnival in Costa Rica     | Carnival in Costa Rica     | Ratoff, Gregory                   | Gregory Ratoff                      | tt0039245 |
| 1746574755 | 1933 | 1932 | Frisco Jenny               | Frisco Jenny               | Wellman, William A.               | William A. Wellman                  | tt0022775 |
| 1746565031 | 1952 | 1952 | The Battle at Apache Pass  | The Battle at Apache Pass  | Sherman, George                   | George Sherman                      | tt0044399 |
| 1746235014 | 1976 | 1976 | Hollywood Boulevard        | Hollywood Boulevard        | Dante, Joe; Arkush, Allan         | Allan Arkush                        | tt0074633 |
| 1746514450 | 1922 | 1922 | Grandma's Boy              | Grandma's Boy              | Newmeyer, Fred                    | Fred C. Newmeyer                    | tt0013201 |
| 1746582656 | 1935 | 1935 | Chinatown Squad            | Chinatown Squad            | Roth, Murray                      | Murray Roth                         | tt0026206 |
| 1746210759 | 1970 | 1970 | Puzzle of a Downfall Child | Puzzle of a Downfall Child | Schatzberg, Jerry                 | Jerry Schatzberg                    | tt0066262 |

|            |      |      |                                          |                                          |                          |                       |           |
|------------|------|------|------------------------------------------|------------------------------------------|--------------------------|-----------------------|-----------|
| 1746574956 | 1933 | 1933 | Forgotten                                | Forgotten                                | Thorpe, Richard          | Richard Thorpe        | tt0024031 |
| 1746508141 | 1926 | 1926 | Tom and His Pals                         | Tom and His Pals                         | De Lacy, Robert          | Robert De Lacey       | tt0017476 |
| 1746569723 | 1954 | 1954 | Gypsy Colt                               | Gypsy Colt                               | Marton, Andrew           | Andrew Marton         | tt0047059 |
| 1746464818 | 1942 | 1942 | Blondie for Victory                      | Blondie for Victory                      | Strayer, Frank R.        | Frank R. Strayer      | tt0034526 |
| 1746524452 | 1910 | 1910 | The Mexican's Jealousy                   | The Mexican's Jealousy                   |                          | Fred J. Balshofer     | tt0358589 |
| 1745342938 | 2009 | 2009 | Shrink                                   | Shrink                                   | Pate, Jonas              | Jonas Pate            | tt1247692 |
| 1746566008 | 1956 | 1956 | The Teahouse of the August Moon          | The Teahouse of the August Moon          | Mann, Daniel             | Daniel Mann           | tt0049830 |
| 1746583697 | 1929 | 1929 | Hot Stuff                                | Hot Stuff                                | LeRoy, Mervyn            | Mervyn LeRoy          | tt0020000 |
| 1746575074 | 1938 | 1938 | Out West with the Hardys                 | Out West with the Hardys                 | Seitz, George B.         | George B. Seitz       | tt0030535 |
| 1746453846 | 1942 | 1942 | The Lone Rider and the Bandit            | The Lone Rider and the Bandit            | Newfield, Sam            | Sam Newfield          | tt0034991 |
| 1746530750 | 1948 | 1948 | Thunderhoof                              | Thunderhoof                              | Karlson, Phil            | Phil Karlson          | tt0040880 |
| 1746424624 | 1942 | 1942 | Bombs over Burma                         | Bombs Over Burma                         | Lewis, Joseph H.         | Joseph H. Lewis       | tt0034538 |
| 1746577613 | 1936 | 1936 | Roamin' Wild                             | Roamin' Wild                             | Ray, Bernard B.          | Bernard B. Ray        | tt0028192 |
| 1746576328 | 1931 | 1931 | The Vice Squad                           | The Vice Squad                           | Cromwell, John           | John Cromwell         | tt0022536 |
| 1746514563 | 1910 | 1910 | Mexican's Ward                           | The Mexican's Ward                       |                          | Fred J. Balshofer     | tt0359691 |
| 1746464789 | 1946 | 1946 | Margie                                   | Margie                                   | King, Henry              | Henry King            | tt0038727 |
| 1746513420 | 1910 | 1910 | The Stage Note                           | The Stage Note                           |                          | Harry Solter          | tt0201168 |
| 1746503596 | 1918 | 1918 | Mr. Logan, U.S.A.                        | Mr. Logan, U.S.A.                        | Reynolds, Lynn F.        | Lynn Reynolds         | tt0009401 |
| 1746581707 | 1929 | 1929 | Seven Footprints to Satan                | Seven Footprints to Satan                | Christensen, Benjamin    | Benjamin Christensen  | tt0020004 |
| 1746532716 | 1927 | 1927 | Back to Liberty                          | Back to Liberty                          | McEveety, Bernard        | Bernard McEveety      | tt0017656 |
| 1745358550 | 2008 | 2008 | The Chronicles of Narnia: Prince Caspian | The Chronicles of Narnia: Prince Caspian | Adamson, Andrew          | Andrew Adamson        | tt0499448 |
| 1746200304 | 1968 | 1968 | Shalako                                  | Shalako                                  | Dmytryk, Edward          | Edward Dmytryk        | tt0063592 |
| 1746454271 | 1944 | 1944 | Black Magic                              | Black Magic                              | Rosen, Phil              | Phil Rosen            | tt0036705 |
| 1746514847 | 1928 | 1928 | A Million for Love                       | A Million for Love                       | Hill, Robert F.          | Robert F. Hill        | tt0019166 |
| 1746454430 | 1998 | 1998 | Happiness                                | Happiness                                | Solondz, Todd            | Todd Solondz          | tt0147612 |
| 1746545409 | 1940 | 1940 | Barnyard Follies                         | Barnyard Follies                         | McDonald, Frank          | Frank McDonald        | tt0032239 |
| 1746453472 | 1944 | 1944 | Mojave Firebrand                         | Mojave Firebrand                         | Bennet, Spencer          | Spencer Gordon Bennet | tt0037082 |
| 1746437312 | 1943 | 1943 | Salute for Three                         | Salute for Three                         | Murphy, Ralph            | Ralph Murphy          | tt0036327 |
| 1746465198 | 1947 | 1947 | Marshal of Cripple Creek                 | Marshal of Cripple Creek                 | Springsteen, R. G.       | R.G. Springsteen      | tt0039612 |
| 1746394164 | 1984 | 1983 | Suburbia                                 | Suburbia                                 | Spheeris, Penelope       | Penelope Spheeris     | tt0086589 |
| 1746435243 | 1941 | 1941 | The Little Foxes                         | The Little Foxes                         | Wyler, William           | William Wyler         | tt0033836 |
| 1746582204 | 1931 | 1931 | Headin' for Trouble                      | Headin' for Trouble                      | McGowan, J. P.           | J.P. McGowan          | tt0021945 |
| 1746573816 | 1956 | 1956 | Anastasia                                | Anastasia                                | Litvak, Anatole          | Anatole Litvak        | tt0048947 |
| 1746487315 | 1917 | 1917 | The Slacker                              | The Slacker                              | Cabanne, William Christy | Christy Cabanne       | tt0008590 |
| 1746438930 | 1941 | 1941 | Forced Landing                           | Forced Landing                           | Wiles, Gordon            | Gordon Wiles          | tt0033620 |
| 1746561699 | 1965 | 1965 | Marriage on the Rocks                    | Marriage on the Rocks                    | Donohue, Jack            | Jack Donohue          | tt0059431 |
| 1746434012 | 1995 | 1995 | Lord of Illusions                        | Lord of Illusions                        | Barker, Clive            | Clive Barker          | tt0113690 |
| 1746511838 | 1910 | 1910 | Mother Love                              | Mother Love                              |                          | Harry Solter          | tt0200873 |
| 1746585268 | 1930 | 1930 | A Lady Surrenders                        | A Lady Surrenders                        | Stahl, John M.           | John M. Stahl         | tt0021041 |
| 1746582082 | 1910 | 1910 | The Last Deal                            | The Last Deal                            | Griffith, D. W.          | D.W. Griffith         | tt0001283 |
| 1745340113 | 2003 | 2002 | Cinerama Adventure                       | Cinerama Adventure                       | Strohmaier, David        | David Strohmaier      | tt0279734 |
| 1746583677 | 1928 | 1928 | The Fourflusher                          | The Fourflusher                          | Ruggles, Wesley          | Wesley Ruggles        | tt0018912 |
| 1746219553 | 1973 | 1973 | The Exorcist                             | The Exorcist                             | Friedkin, William        | William Friedkin      | tt0070047 |
| 1746576522 | 1932 | 1932 | Disorderly Conduct                       | Disorderly Conduct                       | Considine, John W.       | John W. Considine Jr. | tt0022822 |
| 1746583370 | 1930 | 1930 | The Benson Murder Case                   | The Benson Murder Case                   | Tuttle, Frank            | Frank Tuttle          | tt0020679 |
| 1746585378 | 1940 | 1940 | Mexican Spitfire                         | Mexican Spitfire                         | Goodwins, Leslie         | Leslie Goodwins       | tt0031641 |
| 1746467501 | 1917 | 1917 | Moral Courage                            | Moral Courage                            | Fielding, Romaine        | Romaine Fielding      | tt0008316 |
| 1746202882 | 1970 | 1970 | The Strawberry Statement                 | The Strawberry Statement                 | Hagmann, Stuart          | Stuart Hagmann        | tt0066415 |
| 1746584683 | 1930 | 1930 | Men Are Like That                        | Men Are Like That                        | Tuttle, Frank            | Frank Tuttle          | tt0021137 |
| 1746577280 | 1958 | 1958 | Touch of Evil                            | Touch of Evil                            | Welles, Orson            | Orson Welles          | tt0052311 |
| 1746219612 | 1971 | 1971 | Some of My Best Friends Are...           | Some of My Best Friends Are              | Nelson, Mervyn           | Mervyn Nelson         | tt0067771 |
| 1746583057 | 1936 | 1936 | Dancing Feet                             | Dancing Feet                             | Santley, Joseph          | Joseph Santley        | tt0027495 |
| 1746559918 | 1965 | 1965 | Zebra in the Kitchen                     | Zebra in the Kitchen                     | Tors, Ivan               | Ivan Tors             | tt0059944 |
| 1746511803 | 1927 | 1927 | Husbands for Rent                        | Husbands for Rent                        | Lehrman, Henry           | Henry Lehrman         | tt0018019 |
| 1746503362 | 1918 | 1918 | The Safety Curtain                       | The Safety Curtain                       | Franklin, Sidney A.      | Sidney Franklin       | tt0187473 |
| 1746573578 | 1931 | 1931 | The Lightning Flyer                      | The Lightning Flyer                      | Nigh, William            | William Nigh          | tt0022077 |
| 1746580673 | 1937 | 1937 | A Damsel in Distress                     | A Damsel in Distress                     | Stevens, George          | George Stevens        | tt0028757 |

|            |      |      |                                   |                                   |                       |                      |           |
|------------|------|------|-----------------------------------|-----------------------------------|-----------------------|----------------------|-----------|
| 1746578495 | 1959 | 1959 | Timbuktu                          | Timbuktu                          | Tourneur, Jacques     | Jacques Tourneur     | tt0053362 |
| 1746583461 | 1929 | 1929 | The Lawless Legion                | The Lawless Legion                | Brown, Harry J.       | Harry Joe Brown      | tt0020085 |
| 1746583167 | 1940 | 1940 | Saps at Sea                       | Saps at Sea                       | Douglas, Gordon       | Gordon Douglas       | tt0033022 |
| 1746561931 | 1955 | 1954 | Angela                            | Angela                            | O'Keefe, Dennis       | Edoardo Anton        | tt0047831 |
| 1746574101 | 1963 | 1962 | Beauty and the Beast              | Beauty and the Beast              | Cahn, Edward L.       | Edward L. Cahn       | tt0055781 |
| 1746202741 | 1970 | 1970 | Elvis--That's the Way It Is       | Elvis: That's the Way It Is       | Sanders, Denis        | Denis Sanders        | tt0065687 |
| 1746583258 | 1931 | 1931 | Arizona Terror                    | Arizona Terror                    | Rosen, Phil           | Phil Rosen           | tt0021618 |
| 1746574000 | 1958 | 1958 | Gun Fever                         | Gun Fever                         | Stevens, Mark         | Mark Stevens         | tt0051686 |
| 1746235067 | 1973 | 1973 | Scream Bloody Murder              | Scream Bloody Murder              | Ray, Marc B.          | Marc B. Ray          | tt0070654 |
| 1746210860 | 1971 | 1971 | The Hellstrom Chronicle           | The Hellstrom Chronicle           | Green, Walon          | Walon Green          | tt0067197 |
| 1746502239 | 1914 | 1914 | The Mystery of the Poison Pool    | The Mystery of the Poison Pool    | Gordon, James         | James Gordon         | tt0004381 |
| 1746512626 | 1916 | 1916 | A Wife's Sacrifice                | A Wife's Sacrifice                | Edwards, J. Gordon    | J. Gordon Edwards    | tt0007570 |
| 1746436699 | 1943 | 1943 | Chatterbox                        | Chatterbox                        | Santley, Joseph       | Joseph Santley       | tt0035728 |
| 1746410558 | 1988 | 1988 | Midnight Run                      | Midnight Run                      | Brest, Martin         | Martin Brest         | tt0095631 |
| 1746581128 | 1910 | 1910 | A Game for Two                    | A Game for Two                    |                       | Harry Solter         | tt0200651 |
| 1746465115 | 1947 | 1947 | Dark Delusion                     | Dark Delusion                     | Goldbeck, Willis      | Willis Goldbeck      | tt0039301 |
| 1746504766 | 1921 | 1921 | The Devil's Confession            | The Devil's Confession            | Lopez, John S.        | John S. Lopez        | tt0012106 |
| 1746583874 | 1930 | 1930 | Scotland Yard                     | Scotland Yard                     | Howard, William K.    | William K. Howard    | tt0021342 |
| 1746503604 | 1920 | 1920 | The Prince of Avenue A            | The Prince of Avenue A            | Ford, Jack            | John Ford            | tt0011603 |
| 1745340680 | 2003 | 2003 | The Cooler                        | The Cooler                        | Kramer, Wayne         | Wayne Kramer         | tt0318374 |
| 1746559820 | 1964 | 1964 | Dear Heart                        | Dear Heart                        | Mann, Delbert         | Delbert Mann         | tt0057999 |
| 1746574632 | 1936 | 1936 | Love Before Breakfast             | Love Before Breakfast             | Lang, Walter          | Walter Lang          | tt0027908 |
| 1746583624 | 1931 | 1931 | The Lady Refuses                  | The Lady Refuses                  | Archainbaud, George   | George Archainbaud   | tt0022046 |
| 1746465051 | 1944 | 1944 | Riders of the Santa Fe            | Riders of the Santa Fe            | Fox, Wallace W.       | Wallace Fox          | tt0037225 |
| 1745303187 | 2007 | 2006 | Ira and Abby                      | Ira & Abby                        | Cary, Robert          | Robert Cary          | tt0480251 |
| 1746584321 | 1940 | 1940 | Beyond Tomorrow                   | Beyond Tomorrow                   | Sutherland, A. Edward | A. Edward Sutherland | tt0032247 |
| 1746574631 | 1937 | 1937 | Escape by Night                   | Escape by Night                   | MacFadden, Hamilton   | Hamilton MacFadden   | tt0028836 |
| 1746576941 | 1959 | 1959 | The Four Skulls of Jonathan Drake | The Four Skulls of Jonathan Drake | Cahn, Edward L.       | Edward L. Cahn       | tt0052820 |
| 1746508218 | 1924 | 1924 | Tiger Love                        | Tiger Love                        | Melford, George       | George Melford       | tt0015415 |
| 1746532615 | 1927 | 1927 | Women's Wares                     | Women's Wares                     | Gregor, Arthur        | Arthur Gregor        | tt0018594 |
| 1746508894 | 1924 | 1924 | The Diamond Bandit                | The Diamond Bandit                | Ford, Francis         | Francis Ford         | tt0123039 |
| 1746577876 | 1938 | 1938 | Midnight Intruder                 | Midnight Intruder                 | Lubin, Arthur         | Arthur Lubin         | tt0030449 |
| 1746577595 | 1934 | 1934 | The Big Shakedown                 | The Big Shakedown                 | Dillon, John Francis  | John Francis Dillon  | tt0024890 |
| 1745359494 | 2003 | 2003 | Mystic River                      | Mystic River                      | Eastwood, Clint       | Clint Eastwood       | tt0327056 |
| 1746410370 | 1985 | 1985 | The Bride                         | The Bride                         | Roddam, Franc         | Franc Roddam         | tt0088851 |
| 1746502674 | 1913 | 1913 | The Battle of Shiloh              | The Battle of Shiloh              | Smiley, Joseph        | Joseph W. Smiley     | tt0002670 |
| 1769970041 | 1911 | 1911 | The Three Shell Game              | The Three Shell Game              |                       | Allan Dwan           | tt0467059 |
| 1746513412 | 1923 | 1923 | What Wives Want                   | What Wives Want                   | Conway, Jack          | Jack Conway          | tt0014595 |
| 1746568240 | 1933 | 1933 | Eat 'Em Alive                     | Eat 'Em Alive                     | Austin, Harold        | Harold Austin        | tt1145890 |
| 1746475255 | 1945 | 1945 | Fallen Angel                      | Fallen Angel                      | Preminger, Otto       | Otto Preminger       | tt0037691 |
| 1746393198 | 1986 | 1986 | Jake Speed                        | Jake Speed                        | Lane, Andrew          | Andrew Lane          | tt0091282 |
| 1745271899 | 2000 | 2000 | Vertical Limit                    | Vertical Limit                    | Campbell, Martin      | Martin Campbell      | tt0190865 |
| 1746218163 | 1967 | 1967 | Hotel                             | Hotel                             | Quine, Richard        | Richard Quine        | tt0061786 |
| 1769970808 | 1915 | 1915 | The Little Puritan                | The Little Puritan                |                       |                      | tt0005637 |
| 1746574034 | 1963 | 1963 | A Face in the Rain                | Face in the Rain                  | Kershner, Irvin       | Irvin Kershner       | tt0057050 |
| 1746269691 | 1977 | 1977 | Looking for Mr. Goodbar           | Looking for Mr. Goodbar           | Brooks, Richard       | Richard Brooks       | tt0076327 |
| 1746530742 | 1948 | 1948 | Women in the Night                | Women in the Night                | Rowland, William      | William Rowland      | tt0040003 |
| 1746565886 | 1953 | 1953 | The Neanderthal Man               | The Neanderthal Man               | Dupont, E. A.         | Ewald André Dupont   | tt0046121 |
| 1746566017 | 1958 | 1958 | Bonjour Tristesse                 | Bonjour Tristesse                 | Preminger, Otto       | Otto Preminger       | tt0051429 |
| 1745322681 | 2007 | 2007 | The Brothers Solomon              | The Brothers Solomon              | Odenkirk, Bob         | Bob Odenkirk         | tt0784972 |
| 1746584963 | 1940 | 1940 | Rhythm of the Rio Grande          | Rhythm of the Rio Grande          | Herman, Al            | Albert Herman        | tt0032985 |
| 1746583720 | 1929 | 1929 | The Million Dollar Collar         | The Million Dollar Collar         | Lederman, D. Ross     | D. Ross Lederman     | tt0020172 |
| 1746514656 | 1927 | 1927 | The Cancelled Debt                | The Cancelled Debt                | Rosen, Phil           | Phil Rosen           | tt0017732 |
| 1745373231 | 2003 | 2002 | Charlotte Sometimes               | Charlotte Sometimes               | Byler, Eric           | Eric Byler           | tt0284478 |
| 1746513029 | 1915 | 1915 | The Spendthrift                   | The Spendthrift                   | Edwin, Walter         | Walter Edwin         | tt0006084 |
| 1746582493 | 1935 | 1935 | Coronado                          | Coronado                          | McLeod, Norman        | Norman Z. McLeod     | tt0026234 |
| 1746553794 | 1963 | 1963 | Under the Yum Yum Tree            | Under the Yum Yum Tree            | Swift, David          | David Swift          | tt0057622 |



|            |      |      |                                                |                                                |                        |                       |           |
|------------|------|------|------------------------------------------------|------------------------------------------------|------------------------|-----------------------|-----------|
| 1746504396 | 1919 | 1919 | As a Man Thinks                                | As a Man Thinks                                | Irving, George         | George Irving         | tt0009885 |
| 1746502844 | 1916 | 1916 | Lord Loveland Discovers America                | Lord Loveland Discovers America                | Maude, Arthur          | Arthur Maude          | tt0163068 |
| 1746586165 | 1940 | 1940 | The Way of All Flesh                           | The Way of All Flesh                           | King, Louis            | Louis King            | tt0033244 |
| 1746520446 | 1926 | 1926 | The Midnight Kiss                              | The Midnight Kiss                              | Cummings, Irving       | Irving Cummings       | tt0017140 |
| 1746585246 | 1929 | 1929 | Big Time                                       | Big Time                                       | Hawks, Kenneth         | Kenneth Hawks         | tt0019693 |
| 1746508137 | 1949 | 1949 | Savage Splendor                                | Savage Splendor                                |                        | Lewis Cotlow          | tt0218580 |
| 1746580672 | 1939 | 1939 | Mexicali Rose                                  | Mexicali Rose                                  | Sherman, George        | George Sherman        | tt0031640 |
| 1746198190 | 1966 | 1966 | Ride Beyond Vengeance                          | Ride Beyond Vengeance                          | McEveety, Bernard      | Bernard McEveety      | tt0060899 |
| 1746585082 | 1930 | 1930 | Spurs                                          | Spurs                                          | Eason, Reeves          | B. Reeves Eason       | tt0021414 |
| 1746514304 | 1916 | 1916 | The Honorable Algy                             | The Honorable Algy                             | West, Raymond B.       | Raymond B. West       | tt0157766 |
| 1746516007 | 1921 | 1921 | The Fire Cat                                   | The Fire Cat                                   | Dawn, Norman           | Norman Dawn           | tt0012170 |
| 1746569533 | 1958 | 1958 | Going Steady                                   | Going Steady                                   | Sears, Fred F.         | Fred F. Sears         | tt0051669 |
| 1746580207 | 1935 | 1935 | Timber War                                     | Timber War                                     | Newfield, Sam          | Sam Newfield          | tt0028382 |
| 1746582567 | 1935 | 1935 | Calling All Cars                               | Calling All Cars                               | Bennet, Spencer Gordon | Spencer Gordon Bennet | tt0026165 |
| 1746500099 | 1924 | 1924 | The Shadow of the East                         | The Shadow of the East                         | Archainbaud, George    | George Archainbaud    | tt0015319 |
| 1746570409 | 1934 | 1934 | The Richest Girl in the World                  | The Richest Girl in the World                  | Seiter, William A.     | William A. Seiter     | tt0025718 |
| 1746514633 | 1915 | 1915 | Hearts of Men                                  | Hearts of Men                                  | Vekroff, Perry N.      | Perry N. Vekroff      | tt0005461 |
| 1746569552 | 1954 | 1954 | Black Widow                                    | Black Widow                                    | Johnson, Nunnally      | Nunnally Johnson      | tt0046791 |
| 1746573474 | 1931 | 1930 | Cheyenne Kid                                   | The Cheyenne Kid                               | Horner, Robert J.      | Jacques Jaccard       | tt0020761 |
| 1746520532 | 1926 | 1925 | The Open Switch                                | The Open Switch                                | McGowan, J. P.         | J.P. McGowan          | tt0015201 |
| 1746520877 | 1949 | 1949 | The Lovable Cheat                              | The Lovable Cheat                              | Oswald, Richard        | Richard Oswald        | tt0041603 |
| 1746508669 | 1924 | 1924 | The Family Secret                              | The Family Secret                              | Seiter, William        | William A. Seiter     | tt0014874 |
| 1746500067 | 1945 | 1945 | Within These Walls                             | Within These Walls                             | Humberstone, Bruce     | H. Bruce Humberstone  | tt0038255 |
| 1746524743 | 1923 | 1923 | The Midnight Guest                             | The Midnight Guest                             | Archainbaud, George    | George Archainbaud    | tt0014274 |
| 1746503436 | 1918 | 1918 | The Marionettes                                | The Marionettes                                | Chautard, Emile        | Emile Chautard        | tt0009349 |
| 1746439146 | 1945 | 1945 | Confidential Agent                             | Confidential Agent                             | Shumlin, Herman        | Herman Shumlin        | tt0037610 |
| 1746570732 | 1933 | 1933 | West of Singapore                              | West of Singapore                              | Ray, Albert            | Albert Ray            | tt0024759 |
| 1746500378 | 1950 | 1950 | Hot Rod                                        | Hot Rod                                        | Collins, Lewis D.      | Lewis D. Collins      | tt0042578 |
| 1746574913 | 1933 | 1933 | The Cheyenne Kid                               | The Cheyenne Kid                               | Hill, Robert           | Robert F. Hill        | tt0023885 |
| 1745342248 | 2002 | 2002 | Men in Black II                                | Men in Black II                                | Sonnenfeld, Barry      | Barry Sonnenfeld      | tt0120912 |
| 1746409953 | 1985 | 1985 | Summer Rental                                  | Summer Rental                                  | Reiner, Carl           | Carl Reiner           | tt0090098 |
| 1746583577 | 1929 | 1929 | Man, Woman and Wife                            | Man, Woman and Wife                            | Laemmle, Edward        | Edward Laemmle        | tt0019134 |
| 1746578968 | 1959 | 1959 | Cry Tough                                      | Cry Tough                                      | Stanley, Paul          | Paul Stanley          | tt0052716 |
| 1746423466 | 1997 | 1997 | Steel                                          | Steel                                          | Johnson, Kenneth       | Kenneth Johnson       | tt0120207 |
| 1746186296 | 1966 | 1966 | Movie Star, American Style or; LSD, I Hate You | Movie Star, American Style or; LSD, I Hate You | Zugsmith, Albert       | Albert Zugsmith       | tt0060717 |
| 1745358673 | 2003 | 2003 | Peter Pan                                      | Peter Pan                                      | Hogan, P. J.           | P.J. Hogan            | tt0316396 |
| 1746514201 | 1927 | 1927 | The Desert of the Lost                         | The Desert of the Lost                         | Thorpe, Richard        | Richard Thorpe        | tt0017804 |
| 1746520980 | 1950 | 1950 | Born to Be Bad                                 | Born to Be Bad                                 | Ray, Nicholas          | Nicholas Ray          | tt0042275 |
| 1746492556 | 1946 | 1946 | Avalanche                                      | Avalanche                                      | Allen, Irving          | Irving Allen          | tt0038314 |
| 1746200008 | 1969 | 1969 | Wild Wheels                                    | Wild Wheels                                    | Osborne, Kent          | Ken Osborne           | tt0181162 |
| 1769969957 | 1912 | 1912 | A Romance of the Rails                         | Romance of the Rails                           |                        | Harold M. Shaw        | tt0002466 |
| 1745359271 | 2003 | 2003 | Elephant                                       | Elephant                                       | Van Sant, Gus          | Gus Van Sant          | tt0363589 |
| 1746520545 | 1927 | 1926 | The Trunk Mystery                              | The Trunk Mystery                              | Crane, Frank Hall      | Frank Hall Crane      | tt0018510 |
| 1746210739 | 1972 | 1972 | The Cowboys                                    | The Cowboys                                    | Rydell, Mark           | Mark Rydell           | tt0068421 |
| 1746500320 | 1950 | 1950 | Beware of Blondie                              | Beware of Blondie                              | Bernds, Edward         | Edward Berndts        | tt0042243 |
| 1769969555 | 1912 | 1912 | Oh, Such a Night!                              | Oh, Such a Night!                              | Golden, Joseph A.      | Joseph A. Golden      | tt0002397 |
| 1746233536 | 1974 | 1974 | The Conversation                               | The Conversation                               | Coppola, Francis Ford  | Francis Ford Coppola  | tt0071360 |
| 1746474826 | 1948 | 1948 | Miracle in Harlem                              | Miracle in Harlem                              | Kemp, Jack             | Jack Kemp             | tt0040593 |
| 1746520153 | 1927 | 1927 | The Rough Riders                               | The Rough Riders                               | Fleming, Victor        | Victor Fleming        | tt0018346 |
| 1746585030 | 1939 | 1939 | The Family Next Door                           | The Family Next Door                           | Santley, Joseph        | Joseph Santley        | tt0031293 |
| 1746580547 | 1936 | 1936 | Walking on Air                                 | Walking on Air                                 | Santley, Joseph        | Joseph Santley        | tt0028479 |
| 1746234942 | 1966 | 1966 | Duel at Diablo                                 | Duel at Diablo                                 | Nelson, Ralph          | Ralph Nelson          | tt0060355 |
| 1746507759 | 1924 | 1924 | The Lighthouse by the Sea                      | The Lighthouse by the Sea                      | St. Clair, Mal         | Malcolm St. Clair     | tt0015068 |
| 1746514368 | 1915 | 1915 | Monsieur Lecoq                                 | Monsieur Lecoq                                 |                        |                       | tt0005767 |
| 1769970781 | 1912 | 1912 | Cohen Collects a Debt                          | Cohen Collects a Debt                          | Sennett, Mack          | Mack Sennett          | tt0002106 |
| 1746583554 | 1930 | 1930 | Hell's Angels                                  | Hell's Angels                                  | Hughes, Howard         | Howard Hughes         | tt0020960 |
| 1746509057 | 1926 | 1926 | The Count of Luxembourg                        | The Count of Luxembourg                        | Gregor, Arthur         | Arthur Gregor         | tt0321768 |

|            |      |      |                                    |                                    |                            |                    |           |
|------------|------|------|------------------------------------|------------------------------------|----------------------------|--------------------|-----------|
| 1746520536 | 1925 | 1925 | Action Galore                      | Action Galore                      | Eddy, Robert               | Robert Eddy        | tt0015540 |
| 1746580747 | 1937 | 1937 | The Soldier and the Lady           | The Soldier and the Lady           | Nicholls, George           | George Nichols Jr. | tt0029584 |
| 1746515101 | 1920 | 1920 | Honor Bound                        | Honor Bound                        | Jaccard, Jacques           | Jacques Jaccard    | tt0011306 |
| 1746420383 | 1983 | 1983 | Testament                          | Testament                          | Littman, Lynne             | Lynne Littman      | tt0086429 |
| 1746464798 | 1942 | 1942 | Bells of Capistrano                | Bells of Capistrano                | Morgan, William            | William Morgan     | tt0034504 |
| 1746465383 | 1947 | 1947 | Apache Rose                        | Apache Rose                        | Witney, William            | William Witney     | tt0039157 |
| 1746487314 | 1917 | 1917 | S.O.S.                             | S.O.S.                             | Buckley, William           | William Buckley    | tt0182400 |
| 1769969418 | 1965 | 1965 | The Peek Snatchers                 | The Peek Snatchers                 |                            | Joseph P. Mawra    | tt0244128 |
| 1745372391 | 2010 | 2010 | Smash His Camera                   | Smash His Camera                   | Gast, Leon                 | Leon Gast          | tt1280015 |
| 1746410673 | 1992 | 1992 | The Living End                     | The Living End                     | Araki, Gregg               | Gregg Araki        | tt0104745 |
| 1746573966 | 1961 | 1960 | Girl in Room 13                    | Girl in Room 13                    | Cunha, Richard E.          | Richard E. Cunha   | tt0054929 |
| 1746454097 | 1942 | 1942 | Miss Annie Rooney                  | Miss Annie Rooney                  | Marin, Edwin L.            | Edwin L. Marin     | tt0035068 |
| 1746434339 | 1995 | 1995 | Virtuosity                         | Virtuosity                         | Leonard, Brett             | Brett Leonard      | tt0114857 |
| 1746578454 | 1961 | 1961 | Question 7                         | Question 7                         | Rosenberg, Stuart          | Stuart Rosenberg   | tt0055349 |
| 1746582824 | 1934 | 1934 | Smoking Guns                       | Smoking Guns                       | James, Alan                | Alan James         | tt0025061 |
| 1746409976 | 1989 | 1989 | Crimes and Misdemeanors            | Crimes and Misdemeanors            | Allen, Woody               | Woody Allen        | tt0097123 |
| 1746499925 | 1924 | 1923 | The Eternal City                   | The Eternal City                   | Fitzmaurice, George        | George Fitzmaurice | tt0014023 |
| 1746566265 | 1958 | 1958 | The Girl Most Likely               | The Girl Most Likely               | Leisen, Mitchell           | Mitchell Leisen    | tt0050438 |
| 1746582261 | 1930 | 1930 | The Apache Kid's Escape            | The Apache Kid's Escape            | Horner, Robert J.          | Robert J. Horner   | tt0020646 |
| 1746524070 | 1917 | 1917 | Her New York                       | Her New York                       | Lund, Oscar; Moore, Eugene | O.A.C. Lund        | tt0175724 |
| 1746408669 | 1986 | 1986 | About Last Night...                | About Last Night...                | Zwick, Edward              | Edward Zwick       | tt0090583 |
| 1746235070 | 1974 | 1974 | Truck Stop Women                   | Truck Stop Women                   | Lester, Mark L.            | Mark L. Lester     | tt0072324 |
| 1746577670 | 1933 | 1933 | Cross Fire                         | Cross Fire                         | Brower, Otto               | Otto Brower        | tt0023921 |
| 1746503339 | 1922 | 1922 | The Worldly Madonna                | The Worldly Madonna                | Garson, Harry              | Harry Garson       | tt0013792 |
| 1746584864 | 1930 | 1930 | Oklahoma Cyclone                   | The Oklahoma Cyclone               | McCarthy, J. P.            | John P. McCarthy   | tt0021202 |
| 1746512357 | 1923 | 1923 | The Valley of Lost Souls           | The Valley of Lost Souls           | Fleming, Caryl S.          | Caryl S. Fleming   | tt0014571 |
| 1746583472 | 1928 | 1928 | Home James                         | Home, James                        | Beaudine, William          | William Beaudine   | tt0019013 |
| 1746570976 | 1933 | 1933 | Paddy the Next Best Thing          | Paddy the Next Best Thing          | Lachman, Harry             | Harry Lachman      | tt0024424 |
| 1746582096 | 1930 | 1929 | Applause                           | Applause                           | Mamoulian, Rouben          | Rouben Mamoulian   | tt0019644 |
| 1746394186 | 1985 | 1985 | Heaven Help Us                     | Heaven Help Us                     | Dinner, Michael            | Michael Dinner     | tt0089264 |
| 1746423344 | 1996 | 1996 | Trees Lounge                       | Trees Lounge                       | Buscemi, Steve             | Steve Buscemi      | tt0117958 |
| 1746581937 | 1930 | 1930 | Wings of Adventure                 | Wings of Adventure                 | Thorpe, Richard            | Richard Thorpe     | tt0021555 |
| 1746570595 | 1934 | 1934 | She Learned About Sailors          | She Learned About Sailors          | Marshall, George           | George Marshall    | tt0025773 |
| 1746502998 | 1913 | 1913 | The Stranglers of Paris            | The Stranglers of Paris            | Gordon, James              | James Gordon       | tt0003414 |
| 1746437387 | 1941 | 1941 | Let's Make Music                   | Let's Make Music                   | Goodwins, Leslie           | Leslie Goodwins    | tt0032700 |
| 1746577991 | 1939 | 1939 | Never Say Die                      | Never Say Die                      | Nugent, Elliott            | Elliott Nugent     | tt0031716 |
| 1745293777 | 2006 | 2006 | Tenacious D in The Pick of Destiny | Tenacious D in The Pick of Destiny | Lynch, Liam                | Liam Lynch         | tt0365830 |
| 1746437834 | 1944 | 1944 | Lights of Old Santa Fe             | Lights of Old Santa Fe             | McDonald, Frank            | Frank McDonald     | tt0037018 |
| 1746555352 | 1955 | 1955 | Bowery to Bagdad                   | Bowery to Bagdad                   | Bernds, Edward             | Edward Bernds      | tt0044388 |
| 1746555910 | 1956 | 1956 | Showdown at Abilene                | Showdown at Abilene                | Haas, Charles              | Charles F. Haas    | tt0049755 |
| 1769970503 | 1967 | 1967 | Way Out Topless                    | Way Out Topless                    | Francis, Lewis S.          | Lewis S. Francis   | tt0275785 |
| 1746578868 | 1959 | 1959 | Curse of the Undead                | Curse of the Undead                | Dein, Edward               | Edward Dein        | tt0052718 |
| 1746520072 | 1925 | 1925 | After Marriage                     | After Marriage                     | Dawn, Norman               | Norman Dawn        | tt0015546 |
| 1746509209 | 1950 | 1950 | Davy Crockett, Indian Scout        | Davy Crockett, Indian Scout        | Landers, Lew               | Lew Landers        | tt0042383 |
| 1746419766 | 1993 | 1993 | Matinee                            | Matinee                            | Dante, Joe                 | Joe Dante          | tt0107529 |
| 1746438621 | 1945 | 1945 | Bring on the Girls                 | Bring on the Girls                 | Lanfield, Sidney           | Sidney Lanfield    | tt0037560 |
| 1746560520 | 1932 | 1932 | Miss Pinkerton                     | Miss Pinkerton                     | Bacon, Lloyd               | Lloyd Bacon        | tt0023230 |
| 1746394216 | 1990 | 1990 | 3 Men and a Little Lady            | 3 Men and a Little Lady            | Ardolino, Emile            | Emile Ardolino     | tt0098966 |
| 1745271835 | 2000 | 2000 | Romeo Must Die                     | Romeo Must Die                     | Bartkowiak, Andrzej        | Andrzej Bartkowiak | tt0165929 |
| 1746465078 | 1944 | 1944 | Machine Gun Mama                   | Machine Gun Mama                   | Young, Harold M.           | Harold Young       | tt0037033 |
| 1746520951 | 1949 | 1948 | They Live by Night                 | They Live by Night                 | Ray, Nicholas              | Nicholas Ray       | tt0040872 |
| 1745359899 | 2001 | 2000 | Dancing at the Blue Iguana         | Dancing at the Blue Iguana         | Radford, Michael           | Michael Radford    | tt0217355 |
| 1746582850 | 1935 | 1935 | Without Children                   | Without Children                   | Nigh, William              | William Nigh       | tt0027224 |
| 1746512864 | 1923 | 1923 | Modern Marriage                    | Modern Marriage                    | Windom, Lawrence C.        | Victor Heerman     | tt0332709 |
| 1746186061 | 1967 | 1967 | The Comedians                      | The Comedians                      | Glenville, Peter           | Peter Glenville    | tt0061502 |
| 1746583040 | 1936 | 1936 | Swing Time                         | Swing Time                         | Stevens, George            | George Stevens     | tt0028333 |
| 1746514088 | 1910 | 1910 | The Rocky Road                     | The Rocky Road                     | Griffith, D. W.            | D.W. Griffith      | tt0001385 |

|            |      |      |                             |                             |                                  |                     |            |
|------------|------|------|-----------------------------|-----------------------------|----------------------------------|---------------------|------------|
| 1745293271 | 2006 | 2006 | Turistas                    | Turistas                    | Stockwell, John                  | John Stockwell      | tt0454970  |
| 1746581284 | 1960 | 1960 | Butterfield 8               | BUTterfield 8               | Mann, Daniel                     | Daniel Mann         | tt0053622  |
| 1746502289 | 1910 | 1910 | A Victim of Bridge          | A Victim of Bridge          | Miller, Ashley                   | Ashley Miller       | tt1492706  |
| 1746572455 | 1931 | 1931 | God's Gift to Women         | God's Gift to Women         | Curtiz, Michael                  | Michael Curtiz      | tt0021917  |
| 1746438311 | 1941 | 1941 | The Deadly Game             | The Deadly Game             | Rosen, Phil                      | Phil Rosen          | tt0033520  |
| 1746573219 | 1932 | 1932 | Alias Mary Smith            | Alias Mary Smith            | Hopper, E. Mason                 | E. Mason Hopper     | tt0022618  |
| 1746576703 | 1910 | 1910 | The Final Settlement        | The Final Settlement        | Griffith, D. W.                  | D.W. Griffith       | tt0001216  |
| 1746577681 | 1934 | 1934 | Such Women Are Dangerous    | Such Women Are Dangerous    | Flood, James                     | James Flood         | tt0025846  |
| 1746514489 | 1913 | 1913 | Arizona                     | Arizona                     | Thomas, Augustus                 | Augustus E. Thomas  | tt0002637  |
| 1746577161 | 1960 | 1959 | The Gene Krupa Story        | The Gene Krupa Story        | Weis, Don                        | Don Weis            | tt0052840  |
| 1746497315 | 1922 | 1922 | The Ordeal                  | The Ordeal                  | Powell, Paul                     | Paul Powell         | tt0013466  |
| 1746497592 | 1922 | 1922 | Quincy Adams Sawyer         | Quincy Adams Sawyer         | Badger, Clarence G.              | Clarence G. Badger  | tt0013525  |
| 1746514653 | 1915 | 1914 | C.O.D.                      | C.O.D.                      | Johnson, Tefft                   | Tefft Johnson       | tt0003736  |
| 1746423016 | 1999 | 1999 | A Dog of Flanders           | A Dog of Flanders           | Brodie, Kevin                    | Kevin Brodie        | tt0160216  |
| 1746410377 | 1993 | 1993 | Carlito's Way               | Carlito's Way               | De Palma, Brian                  | Brian De Palma      | tt0106519  |
| 1745358995 | 2001 | 2001 | Legally Blonde              | Legally Blonde              | Luketic, Robert                  | Robert Luketic      | tt0250494  |
| 1746583238 | 1930 | 1930 | Showgirl in Hollywood       | Show Girl in Hollywood      | LeRoy, Mervyn                    | Mervyn LeRoy        | tt00321371 |
| 1746555563 | 1956 | 1956 | Between Heaven and Hell     | Between Heaven and Hell     | Fleischer, Richard               | Richard Fleischer   | tt0049004  |
| 1746509304 | 1925 | 1925 | Children of the Whirlwind   | Children of the Whirlwind   | Bennett, Whitman                 | Whitman Bennett     | tt0015682  |
| 1746453619 | 1940 | 1940 | Ma, He's Making Eyes at Me  | Ma! He's Making Eyes at Me  | Schuster, Harold                 | Harold D. Schuster  | tt0032739  |
| 1746573792 | 1958 | 1958 | Cat on a Hot Tin Roof       | Cat on a Hot Tin Roof       | Brooks, Richard                  | Richard Brooks      | tt0051459  |
| 1746258676 | 1980 | 1980 | New Year's Evil             | New Year's Evil             | Alston, Emmett                   | Emmett Alston       | tt0082806  |
| 1746566127 | 1957 | 1957 | Bombers B-52                | Bombers B 52                | Douglas, Gordon                  | Gordon Douglas      | tt0050204  |
| 1746582264 | 1931 | 1931 | Misbehaving Ladies          | Misbehaving Ladies          | Beaudine, William                | William Beaudine    | tt0022154  |
| 1746514821 | 1916 | 1916 | Three of Many               | Three of Many               | Barker, Reginald                 | Reginald Barker     | tt0159024  |
| 1746582827 | 1935 | 1935 | Freckles                    | Freckles                    | Killy, Edward; Hamilton, William | William Hamilton    | tt0026381  |
| 1746422103 | 1994 | 1994 | Pulp Fiction                | Pulp Fiction                | Tarantino, Quentin               | Quentin Tarantino   | tt0110912  |
| 1746585011 | 1939 | 1939 | East Side of Heaven         | East Side of Heaven         | Butler, David                    | David Butler        | tt0031261  |
| 1746211211 | 1972 | 1972 | You'll Like My Mother       | You'll Like My Mother       | Johnson, Lamont                  | Lamont Johnson      | tt0068005  |
| 1746509301 | 1925 | 1925 | His Buddy's Wife            | His Buddy's Wife            | Terriss, Tom                     | Tom Terriss         | tt0015914  |
| 1746454724 | 1997 | 1997 | Ayn Rand: A Sense of Life   | Ayn Rand: A Sense of Life   | Paxton, Michael                  | Michael Paxton      | tt0118662  |
| 1746570144 | 1952 | 1952 | Mutiny                      | Mutiny                      | Dmytryk, Edward                  | Edward Dmytryk      | tt0044936  |
| 1746561170 | 1932 | 1932 | Out of Singapore            | Out of Singapore            | Hutchinson, Charles              | Charles Hutchison   | tt0023309  |
| 1746523716 | 1916 | 1916 | The Isle of Life            | The Isle of Life            | George, Burton                   | Burton George       | tt0006874  |
| 1746492754 | 1945 | 1945 | Tell It to a Star           | Tell It to a Star           | McDonald, Frank                  | Frank McDonald      | tt0038153  |
| 1746454665 | 1941 | 1941 | The Man Who Lost Himself    | The Man Who Lost Himself    | Ludwig, Edward                   | Edward Ludwig       | tt0033875  |
| 1746475650 | 1947 | 1947 | Shadow Valley               | Shadow Valley               | Taylor, Ray                      | Ray Taylor          | tt0039817  |
| 1746474404 | 1948 | 1948 | The Naked City              | The Naked City              | Dassin, Jules                    | Jules Dassin        | tt0040636  |
| 1746520184 | 1924 | 1924 | Flirting With Love          | Flirting with Love          | Dillon, John Francis             | John Francis Dillon | tt0014912  |
| 1746492083 | 1944 | 1944 | Enemy of Women              | Enemy of Women              | Zeisler, Alfred                  | Alfred Zeisler      | tt0036791  |
| 1746453774 | 1942 | 1942 | The Wife Takes a Flyer      | The Wife Takes a Flyer      | Wallace, Richard                 | Richard Wallace     | tt0035560  |
| 1746420535 | 1995 | 1994 | Crumb                       | Crumb                       | Zwigoff, Terry                   | Terry Zwigoff       | tt0109508  |
| 1746217324 | 1965 | 1965 | Billie                      | Billie                      | Weis, Don                        | Don Weis            | tt0058972  |
| 1746502467 | 1910 | 1910 | A Troublesome Parcel        | A Troublesome Parcel        |                                  | Gilbert P. Hamilton | tt1139417  |
| 1746583108 | 1939 | 1939 | News Is Made at Night       | News Is Made at Night       | Werker, Alfred                   | Alfred L. Werker    | tt0031719  |
| 1746491782 | 1947 | 1947 | South of the Chisholm Trail | South of the Chisholm Trail | Abrahams, Derwin                 | Derwin Abrahams     | tt0039855  |
| 1746574619 | 1938 | 1937 | Bulldog Drummond's Revenge  | Bulldog Drummond's Revenge  | King, Louis                      | Louis King          | tt0028670  |
| 1746553836 | 1964 | 1964 | The Starfighters            | The Starfighters            | Zens, Will                       | Will Zens           | tt0058615  |
| 1746585460 | 1940 | 1940 | That Gang of Mine           | That Gang of Mine           | Lewis, Joseph H.                 | Joseph H. Lewis     | tt0033144  |
| 1746508520 | 1950 | 1950 | Indian Territory            | Indian Territory            | English, John                    | John English        | tt0042595  |
| 1746496403 | 1920 | 1920 | Mary's Ankle                | Mary's Ankle                | Ingraham, Lloyd                  | Lloyd Ingraham      | tt0011448  |
| 1746515801 | 1919 | 1919 | The Millionaire Pirate      | The Millionaire Pirate      | Julian, Rupert                   | Rupert Julian       | tt0010463  |
| 1746497519 | 1918 | 1918 | The Mating of Marcella      | The Mating of Marcella      | Neill, R. William                | Roy William Neill   | tt0200845  |
| 1746580288 | 1939 | 1939 | Destry Rides Again          | Destry Rides Again          | Marshall, George                 | George Marshall     | tt0031225  |
| 1746577626 | 1933 | 1933 | Zoo in Budapest             | Zoo in Budapest             | Lee, Rowland V.                  | Rowland V. Lee      | tt0024800  |
| 1746582140 | 1951 | 1950 | Kim                         | Kim                         | Saville, Victor                  | Victor Saville      | tt0042644  |
| 1746524289 | 1916 | 1916 | The Heritage of Hate        | The Heritage of Hate        | George, Burton                   | Burton George       | tt0006795  |

|            |      |      |                                |                                |                         |                        |           |
|------------|------|------|--------------------------------|--------------------------------|-------------------------|------------------------|-----------|
| 1746496069 | 1921 | 1921 | The Leech                      | The Leech                      | Hancock, Herbert        | Herbert Hancock        | tt0012383 |
| 1746574041 | 1956 | 1956 | The Solid Gold Cadillac        | The Solid Gold Cadillac        | Quine, Richard          | Richard Quine          | tt0049777 |
| 1746542650 | 1925 | 1925 | Brand of Cowardice             | Brand of Cowardice             | McCarthy, John P.       | John P. McCarthy       | tt0015642 |
| 1746434343 | 1990 | 1990 | Kindergarten Cop               | Kindergarten Cop               | Reitman, Ivan           | Ivan Reitman           | tt0099938 |
| 1746583192 | 1930 | 1930 | The Czar of Broadway           | The Czar of Broadway           | Craft, William James    | William James Craft    | tt0020801 |
| 1746582915 | 1939 | 1939 | The Big Guy                    | The Big Guy                    | Lubin, Arthur           | Arthur Lubin           | tt0031097 |
| 1746515283 | 1921 | 1921 | R. S. V. P.                    | R.S.V.P.                       | Ray, Charles            | Charles Ray            | tt0012603 |
| 1746585216 | 1928 | 1928 | There He Goes                  | There He Goes                  | Yaconelli, Frank        | Frank Yaconelli        | tt4205700 |
| 1746583568 | 1930 | 1930 | Westward Bound                 | Westward Bound                 | Webb, Harry S.          | Harry S. Webb          | tt0022555 |
| 1746580575 | 1939 | 1939 | The Women                      | The Women                      | Cukor, George           | George Cukor           | tt0032143 |
| 1746504212 | 1920 | 1920 | Dr. Jekyll and Mr. Hyde        | Dr. Jekyll and Mr. Hyde        | Robertson, John S.      | J. Charles Haydon      | tt0011131 |
| 1746453767 | 1941 | 1941 | No Hands on the Clock          | No Hands on the Clock          | McDonald, Frank         | Frank McDonald         | tt0033958 |
| 1746584522 | 1929 | 1929 | The Hollywood Revue of 1929    | The Hollywood Revue of 1929    | Reisner, Charles        | Charles Reisner        | tt0019993 |
| 1746559920 | 1964 | 1964 | Robinson Crusoe on Mars        | Robinson Crusoe on Mars        | Haskin, Byron           | Byron Haskin           | tt0058530 |
| 1746185544 | 1968 | 1968 | Greetings                      | Greetings                      | De Palma, Brian         | Brian De Palma         | tt0063036 |
| 1746577599 | 1935 | 1935 | Rip Roaring Riley              | Rip Roaring Riley              | Clifton, Elmer          | Elmer Clifton          | tt0026937 |
| 1746534806 | 1921 | 1921 | The Man From Lost River        | The Man from Lost River        | Lloyd, Frank            | Frank Lloyd            | tt0012435 |
| 1746520114 | 1925 | 1925 | Getting 'Em Right              | Getting 'Em Right              |                         | Jack Harvey            | tt0325458 |
| 1746530704 | 1950 | 1950 | Border Rangers                 | Border Rangers                 | Berke, William          | William Berke          | tt0042272 |
| 1746577412 | 1950 | 1951 | Rogue River                    | Rogue River                    | Rawlins, John           | John Rawlins           | tt0042900 |
| 1746583418 | 1930 | 1929 | The Sky Hawk                   | The Sky Hawk                   | Blystone, John G.       | John G. Blystone       | tt0021388 |
| 1746566271 | 1954 | 1954 | Apache                         | Apache                         | Aldrich, Robert         | Robert Aldrich         | tt0046719 |
| 1746513837 | 1910 | 1910 | The Song of the Wildwood Flute | The Song of the Wildwood Flute | Griffith, D. W.         | D.W. Griffith          | tt0001400 |
| 1746574702 | 1937 | 1937 | The Lady Escapes               | The Lady Escapes               | Forde, Eugene           | Eugene Forde           | tt0029103 |
| 1746513448 | 1910 | 1910 | Twelfth Night                  | Twelfth Night                  | Ranous, William V.      | Eugene Mullin          | tt0125564 |
| 1746574699 | 1936 | 1936 | Hats Off                       | Hats Off                       | Petroff, Boris          | Boris Petroff          | tt0027720 |
| 1745302991 | 2007 | 2006 | Catch and Release              | Catch and Release              | Grant, Susannah         | Susannah Grant         | tt0395495 |
| 1746435689 | 1942 | 1942 | Private Snuffy Smith           | Private Snuffy Smith           | Cline, Edward           | Edward F. Cline        | tt0035220 |
| 1746584297 | 1935 | 1935 | Make a Million                 | Make a Million                 | Collins, Lewis D.       | Lewis D. Collins       | tt0026668 |
| 1746475978 | 1945 | 1945 | Betrayal from the East         | Betrayal from the East         | Berke, William          | William Berke          | tt0037538 |
| 1746582280 | 1928 | 1928 | Through the Breakers           | Through the Breakers           | Boyle, Joseph C.        | Joseph Boyle           | tt0019473 |
| 1746520334 | 1925 | 1925 | The Marriage Whirl             | The Marriage Whirl             | Santell, Alfred         | Alfred Santell         | tt0016093 |
| 1745282755 | 2006 | 2006 | Something New                  | Something New                  | Hamri, Sanaa            | Scott Siskin           | tt0909827 |
| 1746578717 | 1960 | 1960 | Chartreuse Caboose             | Chartreuse Caboose             | Reynolds, William "Red" | William "Red" Reynolds | tt0053705 |
| 1746582171 | 1928 | 1928 | Two Gun O'Brien                | Two Gun O'Brien                | Horner, Robert J.       | Robert J. Horner       | tt0019499 |
| 1746498666 | 1918 | 1917 | To the Highest Bidder          | To the Highest Bidder          | Terriss, Tom            | Lucius Henderson       | tt0267032 |
| 1745342461 | 2002 | 2001 | Hell House                     | Hell House                     | Ratliff, George         | George Ratliff         | tt0301235 |
| 1746566210 | 1958 | 1957 | Witness for the Prosecution    | Witness for the Prosecution    | Wilder, Billy           | Billy Wilder           | tt0051201 |
| 1746497058 | 1920 | 1920 | Kismet                         | Kismet                         | Gasnier, Louis J.       | Louis J. Gasnier       | tt0011368 |
| 1769970642 | 1968 | 1968 | Pamela, Pamela You Are ...     | Pamela, Pamela, You Are...     | Rose, William L.        | William Rose           | tt0254653 |
| 1746578477 | 1963 | 1963 | Of Love and Desire             | Of Love and Desire             | Rush, Richard           | Richard Rush           | tt0057378 |
| 1745359126 | 2002 | 2002 | Frida                          | Frida                          | Taymor, Julie           | Julie Taymor           | tt0120679 |
| 1746433688 | 1997 | 1997 | Hoodlum                        | Hoodlum                        | Duke, Bill              | Bill Duke              | tt0119311 |
| 1746577730 | 1933 | 1932 | Speed Demon                    | Speed Demon                    | Lederman, D. Ross       | D. Ross Lederman       | tt0024304 |
| 1746578806 | 1962 | 1962 | Hatari!                        | Hatari!                        | Hawks, Howard           | Howard Hawks           | tt0056059 |
| 1746581584 | 1928 | 1928 | West of Paradise               | West of Paradise               |                         |                        | tt0177374 |
| 1746502004 | 1916 | 1916 | The Wolf Woman                 | The Wolf Woman                 | West, Raymond B.        | Raymond B. West        | tt0159134 |
| 1746503900 | 1922 | 1922 | The Menacing Past              | The Menacing Past              |                         | Tom Gibson             | tt0416975 |
| 1746574426 | 1958 | 1958 | Too Much, Too Soon             | Too Much, Too Soon             | Napoleon, Art           | Art Napoleon           | tt0052302 |
| 1746513199 | 1923 | 1923 | Bluebeard's 8th Wife           | Bluebeard's 8th Wife           | Wood, Sam               | Sam Wood               | tt0013877 |
| 1746530805 | 1948 | 1948 | The Feathered Serpent          | The Feathered Serpent          | Beaudine, William       | William Beaudine       | tt0040347 |
| 1746208682 | 1969 | 1969 | Che!                           | Che!                           | Fleischer, Richard      | Richard Fleischer      | tt0064158 |
| 1769969571 | 1911 | 1911 | The Love of the West           | The Love of the West           |                         | Allan Dwan             | tt0403241 |
| 1746585169 | 1930 | 1930 | The Return of Dr. Fu Manchu    | The Return of Dr. Fu Manchu    | Lee, Rowland V.         | Rowland V. Lee         | tt0021297 |
| 1746573871 | 1958 | 1958 | High School Confidential!      | High School Confidential!      | Arnold, Jack            | Jack Arnold            | tt0051724 |
| 1746525001 | 1927 | 1927 | Ham and Eggs at the Front      | Ham and Eggs at the Front      | Del Ruth, Roy           | Roy Del Ruth           | tt0017958 |
| 1746409344 | 1987 | 1987 | The Hidden                     | The Hidden                     | Sholder, Jack           | Jack Sholder           | tt0093185 |

|            |      |      |                                 |                                 |                                 |                     |           |
|------------|------|------|---------------------------------|---------------------------------|---------------------------------|---------------------|-----------|
| 1746574347 | 1951 | 1951 | Smuggler's Island               | Smuggler's Island               | Ludwig, Edward                  | Edward Ludwig       | tt0044051 |
| 1746524800 | 1927 | 1927 | The Grey Streak                 | The Grey Streak                 |                                 |                     | tt0361675 |
| 1746514551 | 1916 | 1916 | The Little Liar                 | The Little Liar                 | Ingraham, Lloyd                 | Lloyd Ingraham      | tt0006931 |
| 1746433549 | 1996 | 1996 | Mary Reilly                     | Mary Reilly                     | Frears, Stephen                 | Stephen Frears      | tt0117002 |
| 1746465216 | 1944 | 1944 | Voodoo Man                      | Voodoo Man                      | Beaudine, William               | William Beaudine    | tt0037441 |
| 1746422223 | 1997 | 1997 | Wishmaster                      | Wishmaster                      | Kurtzman, Robert                | Robert Kurtzman     | tt0120524 |
| 1746582585 | 1936 | 1936 | The Gay Desperado               | The Gay Desperado               | Mamoulian, Rouben               | Rouben Mamoulian    | tt0027660 |
| 1746499990 | 1924 | 1924 | Robes of Sin                    | Robes of Sin                    | Allen, Russell                  | Russell Allen       | tt0015285 |
| 1746496992 | 1922 | 1922 | The Siren Call                  | The Siren Call                  | Willat, Irvin                   | Irvin Willat        | tt0013605 |
| 1746520812 | 1949 | 1949 | Rim of the Canyon               | Rim of the Canyon               | English, John                   | John English        | tt0041810 |
| 1746578676 | 1951 | 1951 | You Never Can Tell              | You Never Can Tell              | Breslow, Lou                    | Lou Breslow         | tt0044223 |
| 1746473915 | 1947 | 1947 | Homesteaders of Paradise Valley | Homesteaders of Paradise Valley | Springsteen, R. G.              | R.G. Springsteen    | tt0039470 |
| 1746454261 | 1943 | 1943 | Three Hearts for Julia          | Three Hearts for Julia          | Thorpe, Richard                 | Richard Thorpe      | tt0036433 |
| 1746520968 | 1949 | 1949 | Law of the Barbary Coast        | Law of the Barbary Coast        | Landers, Lew                    | Lew Landers         | tt0041582 |
| 1746561474 | 1932 | 1932 | Thrill of Youth                 | Thrill of Youth                 | Thorpe, Richard                 | Richard Thorpe      | tt0023592 |
| 1746560076 | 1964 | 1964 | The Disorderly Orderly          | The Disorderly Orderly          | Tashlin, Frank                  | Frank Tashlin       | tt0058018 |
| 1746393670 | 1983 | 1983 | Yentl                           | Yentl                           | Streisand, Barbra               | Barbra Streisand    | tt0086619 |
| 1746520045 | 1927 | 1927 | Set Free                        | Set Free                        | Rosson, Arthur                  | Arthur Rosson       | tt0018378 |
| 1746553499 | 1964 | 1964 | Kitten With a Whip              | Kitten with a Whip              | Heyes, Douglas                  | Douglas Heyes       | tt0058267 |
| 1746492566 | 1944 | 1944 | Tall in the Saddle              | Tall in the Saddle              | Marin, Edwin L.                 | Edwin L. Marin      | tt0037343 |
| 1746454737 | 1998 | 1998 | One Tough Cop                   | One Tough Cop                   | Barreto, Bruno                  | Bruno Barreto       | tt0122642 |
| 1746500151 | 1946 | 1946 | Crime Doctor's Man Hunt         | Crime Doctor's Man Hunt         | Castle, William                 | William Castle      | tt0038430 |
| 1746580214 | 1937 | 1937 | Stella Dallas                   | Stella Dallas                   | Vidor, King                     | King Vidor          | tt0029608 |
| 1746393173 | 1984 | 1984 | The Times of Harvey Milk        | The Times of Harvey Milk        | Epstein, Robert                 | Rob Epstein         | tt0088275 |
| 1769976149 | 1927 | 1927 | The Bum's Rush                  | The Bum's Rush                  | Davis, James; Goodwins, Leslie  | James D. Davis      | tt0313330 |
| 1746574067 | 1962 | 1962 | Mutiny on the Bounty            | Mutiny on the Bounty            | Milestone, Lewis; Reed, Carol   | Lewis Milestone     | tt0056264 |
| 1746260201 | 1978 | 1977 | Word Is Out                     | Word Is Out                     |                                 | Nancy Adair         | tt0199143 |
| 1746439445 | 1999 | 1999 | The Corruptor                   | The Corruptor                   | Foley, James                    | James Foley         | tt0142192 |
| 1746571066 | 1952 | 1952 | Mr. Walkie Talkie               | Mr. Walkie Talkie               | Guiol, Fred L.                  | Fred Guiol          | tt0195927 |
| 1746420536 | 1996 | 1996 | Girls Town                      | Girls Town                      | McKay, Jim                      | Jim McKay           | tt0116418 |
| 1746580306 | 1935 | 1935 | Alice Adams                     | Alice Adams                     | Stevens, George                 | George Stevens      | tt0026056 |
| 1746585392 | 1940 | 1940 | The Fatal Hour                  | The Fatal Hour                  | Nigh, William                   | William Nigh        | tt0032457 |
| 1746437419 | 1941 | 1941 | Sign of the Wolf                | Sign of the Wolf                | Bretherton, Howard              | Howard Bretherton   | tt0034188 |
| 1746473663 | 1942 | 1942 | You Can't Escape Forever        | You Can't Escape Forever        | Graham, Jo                      | Jo Graham           | tt0035582 |
| 1746585213 | 1928 | 1928 | The Air Patrol                  | The Air Patrol                  | Mitchell, Bruce                 | Bruce Mitchell      | tt0018635 |
| 1746500008 | 1949 | 1949 | Slattery's Hurricane            | Slattery's Hurricane            | DeToth, Andre                   | André De Toth       | tt0041883 |
| 1769976683 | 1973 | 1974 | The Naughty Stewardesses        | The Naughty Stewardesses        | Adamson, Al                     | Al Adamson          | tt0125430 |
| 1746553422 | 1965 | 1965 | Clarence, the Cross-Eyed Lion   | Clarence, the Cross Eyed Lion   | Marton, Andrew                  | Andrew Marton       | tt0059039 |
| 1746534810 | 1921 | 1921 | The Miracle of Manhattan        | The Miracle of Manhattan        | Archainbaud, George             | George Archainbaud  | tt0012462 |
| 1746573556 | 1931 | 1931 | Wild Horse                      | Wild Horse                      | Thorpe, Richard; Algier, Sidney | Sidney Algier       | tt0022562 |
| 1746500085 | 1924 | 1924 | For Sale                        | For Sale                        | Archainbaud, George             | George Archainbaud  | tt0014923 |
| 1746583242 | 1928 | 1928 | Fashion Madness                 | Fashion Madness                 | Gasnier, Louis J.               | Louis J. Gasnier    | tt0018878 |
| 1746422004 | 1996 | 1996 | Kazaam                          | Kazaam                          | Glaser, Paul M.                 | Paul Michael Glaser | tt0116756 |
| 1746433902 | 1998 | 1998 | The Gingerbread Man             | The Gingerbread Man             | Altman, Robert                  | Robert Altman       | tt0119196 |
| 1746485197 | 1917 | 1917 | The Haunted House               | The Haunted House               | Parker, Albert                  | Albert Parker       | tt0008052 |
| 1745342642 | 2010 | 2010 | Faster                          | Faster                          | Tillman, George                 | George Tillman Jr.  | tt1433108 |
| 1746437006 | 1942 | 1942 | Sweater Girl                    | Sweater Girl                    | Clemens, William                | William Clemens     | tt0035400 |
| 1746577469 | 1959 | 1959 | The Nun's Story                 | The Nun's Story                 | Zinnemann, Fred                 | Fred Zinnemann      | tt0053131 |
| 1746408859 | 1988 | 1988 | The Boost                       | The Boost                       | Becker, Harold                  | Harold Becker       | tt0094783 |
| 1769970144 | 1912 | 1912 | The Dove and the Serpent        | The Dove and the Serpent        |                                 | Francis J. Grandon  | tt0256730 |
| 1746500173 | 1924 | 1924 | Sinners in Silk                 | Sinners in Silk                 | Henley, Hobart                  | Hobart Henley       | tt0015336 |
| 1769976693 | 1974 | 1974 | The Working Girls               | The Working Girls               | Rothman, Stephanie              | Stephanie Rothman   | tt0070927 |
| 1746393978 | 1991 | 1991 | Flight of the Intruder          | Flight of the Intruder          | Milius, John                    | John Milius         | tt0099587 |
| 1746500278 | 1926 | 1926 | His Jazz Bride                  | His Jazz Bride                  | Raymaker, Herman C.             | Herman C. Raymaker  | tt0016972 |
| 1746501452 | 1915 | 1915 | The Sentimental Lady            | The Sentimental Lady            | Edwin, Walter                   | Walter Edwin        | tt0006025 |
| 1746508401 | 1924 | 1924 | False Trails                    | False Trails                    |                                 | Forrest Sheldon     | tt0131381 |
| 1746555305 | 1955 | 1955 | Carolina Cannonball             | Carolina Cannonball             | Lamont, Charles                 | Charles Lamont      | tt0047922 |

|            |      |      |                                    |                                    |                                               |                        |           |
|------------|------|------|------------------------------------|------------------------------------|-----------------------------------------------|------------------------|-----------|
| 1746420322 | 1940 | 1940 | Scatterbrain                       | Scatterbrain                       | Meins, Gus                                    | Gus Meins              | tt0033027 |
| 1746577719 | 1933 | 1933 | In the Money                       | In the Money                       | Strayer, Frank                                | Frank R. Strayer       | tt0025306 |
| 1746218051 | 1967 | 1967 | Doctor, You've Got To Be Kidding   | Doctor, You've Got to Be Kidding!  | Tewksbury, Peter                              | Peter Tewksbury        | tt0061585 |
| 1746514076 | 1916 | 1916 | The Yellow Passport                | The Yellow Passport                | August, Edwin                                 | Edwin August           | tt0007599 |
| 1746578986 | 1963 | 1963 | Johnny Cool                        | Johnny Cool                        | Asher, William                                | William Asher          | tt0057200 |
| 1746409927 | 1988 | 1988 | Eight Men Out                      | Eight Men Out                      | Sayles, John                                  | John Sayles            | tt0095082 |
| 1746569610 | 1957 | 1957 | Oh, Men! Oh, Women!                | Oh, Men! Oh, Women!                | Johnson, Nunnally                             | Nunnally Johnson       | tt0050795 |
| 1746504752 | 1918 | 1918 | Peg O' the Sea                     | Peg o' the Sea                     | Nowland, Eugene                               | Eugene Nowland         | tt0187396 |
| 1746574576 | 1952 | 1952 | Don't Bother to Knock              | Don't Bother to Knock              | Baker, Roy                                    | Roy Ward Baker         | tt0044557 |
| 1746569694 | 1955 | 1955 | Betrayed Women                     | Betrayed Women                     | Cahn, Edward L.                               | Edward L. Cahn         | tt0047875 |
| 1746561895 | 1955 | 1955 | A Man Alone                        | A Man Alone                        | Milland, R.                                   | Ray Milland            | tt0048336 |
| 1746409302 | 1984 | 1984 | City Heat                          | City Heat                          | Benjamin, Richard                             | Richard Benjamin       | tt0087062 |
| 1746532617 | 1916 | 1916 | The Drifter                        | The Drifter                        | Garrick, Richard                              | Richard Garrick        | tt0157558 |
| 1746208214 | 1968 | 1968 | How to Make a Doll                 | How to Make a Doll                 |                                               | Herschell Gordon Lewis | tt0063101 |
| 1746577251 | 1963 | 1963 | Love With the Proper Stranger      | Love with the Proper Stranger      | Mulligan, Robert                              | Robert Mulligan        | tt0057263 |
| 1746572618 | 1932 | 1932 | Three on a Match                   | Three on a Match                   | LeRoy, Mervyn                                 | Mervyn LeRoy           | tt0023590 |
| 1746467513 | 1917 | 1917 | Motherhood                         | Motherhood                         | Powell, Frank                                 | Frank Powell           | tt0007097 |
| 1746530804 | 1949 | 1949 | Scene of the Crime                 | Scene of the Crime                 | Rowland, Roy                                  | Roy Rowland            | tt0041847 |
| 1746503262 | 1917 | 1917 | The Little Chevalier               | The Little Chevalier               | Crosland, Alan                                | Alan Crosland          | tt0176938 |
| 1746500489 | 1950 | 1950 | Harriet Craig                      | Harriet Craig                      | Sherman, Vincent                              | Vincent Sherman        | tt0042544 |
| 1746249248 | 1976 | 1976 | Next Stop, Greenwich Village       | Next Stop, Greenwich Village       | Mazursky, Paul                                | Paul Mazursky          | tt0074963 |
| 1746583297 | 1928 | 1928 | The Air Circus                     | The Air Circus                     | Hawks, Howard; Seiler, Lewis                  | Howard Hawks           | tt0018633 |
| 1746584450 | 1931 | 1931 | Sit Tight                          | Sit Tight                          | Bacon, Lloyd                                  | Lloyd Bacon            | tt0022391 |
| 1746475538 | 1945 | 1945 | The Cisco Kid Returns              | The Cisco Kid Returns              | McCarthy, John P.                             | John P. McCarthy       | tt0037600 |
| 1746233535 | 1966 | 1966 | Women of the Prehistoric Planet    | Women of the Prehistoric Planet    | Pierce, Arthur C.                             | Arthur C. Pierce       | tt0061203 |
| 1746508006 | 1926 | 1926 | Red Hot Leather                    | Red Hot Leather                    | Rogell, Albert                                | Albert S. Rogell       | tt0017319 |
| 1746580849 | 1938 | 1938 | Barefoot Boy                       | Barefoot Boy                       | Brown, Karl                                   | Karl Brown             | tt0029898 |
| 1746580865 | 1937 | 1937 | Adventure's End                    | Adventure's End                    | Lubin, Arthur                                 | Arthur Lubin           | tt0028554 |
| 1746570988 | 1934 | 1934 | Desirable                          | Desirable                          | Mayo, Archie L.                               | Archie Mayo            | tt0025046 |
| 1746578437 | 1962 | 1962 | Cape Fear                          | Cape Fear                          | Thompson, J. Lee                              | J. Lee Thompson        | tt0055824 |
| 1746434612 | 1990 | 1990 | The Last of the Finest             | The Last of the Finest             | Mackenzie, John                               | John Mackenzie         | tt0099991 |
| 1746584459 | 1930 | 1930 | Moby Dick                          | Moby Dick                          | Bacon, Lloyd                                  | Lloyd Bacon            | tt0021149 |
| 1746568347 | 1952 | 1952 | The Narrow Margin                  | The Narrow Margin                  | Fleischer, Richard                            | Richard Fleischer      | tt0044954 |
| 1746584784 | 1929 | 1929 | The Locked Door                    | The Locked Door                    | Fitzmaurice, Geo.                             | George Fitzmaurice     | tt0020103 |
| 1746560439 | 1965 | 1965 | Wild on the Beach                  | Wild on the Beach                  | Dexter, Maury                                 | Maury Dexter           | tt0059913 |
| 1746435570 | 1942 | 1942 | Youth on Parade                    | Youth on Parade                    | Rogell, Albert S.                             | Albert S. Rogell       | tt0035587 |
| 1746520749 | 1925 | 1925 | The Charmer                        | The Charmer                        | Olcott, Sidney                                | Sidney Olcott          | tt0015677 |
| 1746509529 | 1926 | 1927 | Wolves of the Air                  | Wolves of the Air                  | Ford, Francis                                 | Francis Ford           | tt0018587 |
| 1746219664 | 1975 | 1975 | Nashville                          | Nashville                          | Altman, Robert                                | Robert Altman          | tt0073440 |
| 1746515382 | 1921 | 1921 | Conceit                            | Conceit                            | George, Burton                                | Burton George          | tt0012063 |
| 1746394163 | 1985 | 1985 | King Solomon's Mines               | King Solomon's Mines               | Thompson, J. Lee                              | J. Lee Thompson        | tt0089421 |
| 1746583365 | 1928 | 1928 | The Devil's Skipper                | The Devil's Skipper                | Adolfi, John G.                               | John G. Adolfi         | tt0018830 |
| 1746569786 | 1958 | 1958 | Frankenstein--1970                 | Frankenstein 1970                  | Koch, Howard W.                               | Howard W. Koch         | tt0051630 |
| 1746410732 | 1986 | 1986 | Aliens                             | Aliens                             | Cameron, James                                | James Cameron          | tt0090605 |
| 1746436097 | 1940 | 1940 | Texas Terrors                      | Texas Terrors                      | Sherman, George                               | George Sherman         | tt0033143 |
| 1746571121 | 1933 | 1933 | King Kong                          | King Kong                          | Cooper, Merian C.; Schoedsack, Erne Merian C. | Erne Merian C. Cooper  | tt0024216 |
| 1746564974 | 1952 | 1952 | Arctic Flight                      | Arctic Flight                      | Landers, Lew; Scott, Ewing                    | Lew Landers            | tt0044371 |
| 1746435260 | 1940 | 1940 | Pioneers of the Frontier           | Pioneers of the Frontier           | Nelson, Sam                                   | Sam Nelson             | tt0032913 |
| 1746500425 | 1948 | 1948 | Triple Threat                      | Triple Threat                      | Yarbrough, Jean                               | Jean Yarbrough         | tt0040904 |
| 1746566023 | 1958 | 1958 | Attack of the Puppet People        | Attack of the Puppet People        | Gordon, Bert I.                               | Bert I. Gordon         | tt0051381 |
| 1746503400 | 1919 | 1919 | Heart O' the Hills                 | Heart o' the Hills                 | Franklin, Sidney A.                           | Joseph De Grasse       | tt0010227 |
| 1746486789 | 1921 | 1921 | Tropical Love                      | Tropical Love                      | Ince, Ralph                                   | Ralph Ince             | tt0012781 |
| 1746435927 | 1990 | 1990 | Reversal of Fortune                | Reversal of Fortune                | Schroeder, Barbet                             | Barbet Schroeder       | tt0100486 |
| 1746419200 | 1988 | 1988 | Cocktail                           | Cocktail                           | Donaldson, Roger                              | Roger Donaldson        | tt0094889 |
| 1746580931 | 1959 | 1958 | Born Reckless                      | Born Reckless                      | Koch, Howard W.                               | Howard W. Koch         | tt0051431 |
| 1746573765 | 1959 | 1959 | The World, the Flesh and the Devil | The World, the Flesh and the Devil | MacDougall, Randal                            | Randal MacDougall      | tt0053454 |
| 1746582532 | 1935 | 1935 | In Person                          | In Person                          | Seiter, William A.                            | William A. Seiter      | tt0026525 |

|            |      |      |                                        |                                        |                                   |                                     |           |
|------------|------|------|----------------------------------------|----------------------------------------|-----------------------------------|-------------------------------------|-----------|
| 1746501859 | 1915 | 1915 | Bought                                 | Bought                                 | O'Neil, Barry                     | Barry O'Neil                        | tt0004993 |
| 1746569791 | 1956 | 1956 | Ghost Town                             | Ghost Town                             | Miner, Allen                      | Allen H. Miner                      | tt0048115 |
| 1746581710 | 1930 | 1930 | Midnight Mystery                       | Midnight Mystery                       | Seitz, George B.                  | George B. Seitz                     | tt0021144 |
| 1746514782 | 1916 | 1916 | The Awakening of Bess Morton           | The Awakening of Bess Morton           | Thayer, Otis B.                   | Otis Thayer                         | tt0006388 |
| 1746562426 | 1956 | 1956 | Crashing Las Vegas                     | Crashing Las Vegas                     | Yarbrough, Jean                   | Jean Yarbrough                      | tt0049101 |
| 1746583363 | 1929 | 1929 | The Song of Love                       | The Song of Love                       | Kenton, Erle C.                   | Erle C. Kenton                      | tt0020434 |
| 1746530731 | 1950 | 1950 | Marshal of Helderado                   | Marshal of Helderado                   | Carr, Thomas                      | Thomas Carr                         | tt0042714 |
| 1746507787 | 1924 | 1924 | A Cafe in Cairo                        | A Cafe in Cairo                        | Withey, Chet                      | Chester Withey                      | tt0014754 |
| 1746585394 | 1940 | 1940 | A Chump at Oxford                      | A Chump at Oxford                      | Goulding, Alfred                  | Alfred J. Goulding                  | tt0032339 |
| 1746235702 | 1980 | 1980 | Xanadu                                 | Xanadu                                 | Greenwald, Robert                 | Robert Greenwald                    | tt0081777 |
| 1746577879 | 1937 | 1937 | The Last Train from Madrid             | The Last Train from Madrid             | Hogan, James                      | James P. Hogan                      | tt0029119 |
| 1746523461 | 1916 | 1916 | The Human Orchid                       | The Human Orchid                       | Field, C. C.                      | C.C. Field                          | tt0157778 |
| 1746563228 | 1952 | 1952 | 5 Fingers                              | 5 Fingers                              | Mankiewicz, Joseph L.             | Joseph L. Mankiewicz                | tt0044314 |
| 1746454605 | 1996 | 1996 | From Dusk till Dawn                    | From Dusk Till Dawn                    | Rodriguez, Robert                 | Robert Rodriguez                    | tt0116367 |
| 1746566366 | 1957 | 1957 | The Monolith Monsters                  | The Monolith Monsters                  | Sherwood, John                    | John Sherwood                       | tt0050720 |
| 1746520931 | 1949 | 1948 | Ladies of the Chorus                   | Ladies of the Chorus                   | Karlson, Phil                     | Phil Karlson                        | tt0041571 |
| 1746580302 | 1936 | 1936 | Bullets or Ballots                     | Bullets or Ballots                     | Keighley, William                 | William Keighley                    | tt0027407 |
| 1746514340 | 1916 | 1916 | The Path of Darkness                   | The Path of Darkness                   | De Vere, Harry T.                 | Harry De Vere                       | tt0163144 |
| 1746504387 | 1918 | 1918 | Peck's Bad Girl                        | Peck's Bad Girl                        | Giblyn, Charles                   | Charles Giblyn                      | tt0009482 |
| 1746524238 | 1916 | 1916 | The Reward of Patience                 | The Reward of Patience                 | Vignola, Robert G.                | Robert G. Vignola                   | tt0007262 |
| 1746574311 | 1962 | 1962 | Time of the Heathen                    | Time of the Heathen                    | Kass, Peter                       | Peter Kass                          | tt0056589 |
| 1746586166 | 1940 | 1940 | Kitty Foyle                            | Kitty Foyle                            | Wood, Sam                         | Sam Wood                            | tt0032671 |
| 1746209652 | 1967 | 1967 | Tarzan and the Great River             | Tarzan and the Great River             | Day, Robert                       | Robert Day                          | tt0062341 |
| 1746582589 | 1937 | 1937 | Join the Marines                       | Join the Marines                       | Staub, Ralph                      | Ralph Staub                         | tt0029070 |
| 1746219398 | 1977 | 1977 | The Island of Dr. Moreau               | The Island of Dr. Moreau               | Taylor, Don                       | Don Taylor                          | tt0076210 |
| 1745340238 | 2001 | 2001 | Final                                  | Final                                  | Scott, Campbell                   | Campbell Scott                      | tt0277705 |
| 1746584760 | 1930 | 1930 | Up the River                           | Up the River                           | Ford, John                        | John Ford                           | tt0021508 |
| 1746512453 | 1922 | 1922 | A Desert Bridegroom                    | The Desert Bridegroom                  | Clements, Roy                     | Roy Clements                        | tt0013060 |
| 1746582935 | 1938 | 1938 | The Night Hawk                         | The Night Hawk                         | Salkow, Sidney                    | Sidney Salkow                       | tt0030501 |
| 1746183846 | 1910 | 1910 | Baseball, That's All                   | Baseball, That's All                   |                                   | Gaston Méliès                       | tt0361335 |
| 1746508683 | 1924 | 1924 | Unguarded Women                        | Unguarded Women                        | Crosland, Alan                    | Alan Crosland                       | tt0015446 |
| 1746233376 | 1967 | 1967 | The Producers                          | The Producers                          | Brooks, Mel                       | Mel Brooks                          | tt0063462 |
| 1746437919 | 1943 | 1942 | Quiet Please Murder                    | Quiet Please: Murder                   | Larkin, John                      | John Francis Larkin                 | tt0035233 |
| 1746455329 | 2000 | 2000 | Joe Gould's Secret                     | Joe Gould's Secret                     | Tucci, Stanley                    | Stanley Tucci                       | tt0172632 |
| 1746183131 | 1910 | 1910 | Broncho Billy's Redemption             | Broncho Billy's Redemption             |                                   | Gilbert M. 'Broncho Billy' Anderson | tt0001137 |
| 1746421582 | 1997 | 1997 | Mimic                                  | Mimic                                  | del Toro, Guillermo               | Guillermo del Toro                  | tt0119675 |
| 1746248284 | 1966 | 1966 | The Case of the Stripping Wives        | The Case of the Stripping Wives        | Conde, Manuel S.; Maury, Maria D. | Manuel Conde                        | tt0385585 |
| 1746248305 | 1968 | 1968 | Coogan's Bluff                         | Coogan's Bluff                         | Siegel, Donald                    | Don Siegel                          | tt0062824 |
| 1746500197 | 1950 | 1950 | The Baron of Arizona                   | The Baron of Arizona                   | Fuller, Samuel                    | Samuel Fuller                       | tt0042229 |
| 1746581596 | 1910 | 1910 | Hank and Lank: as Sandwich Men         | Hank and Lank: As Sandwich Men         |                                   | Gilbert M. 'Broncho Billy' Anderson | tt0206797 |
| 1746439139 | 1941 | 1941 | In Old Cheyenne                        | In Old Cheyenne                        | Kane, Joseph                      | Joseph Kane                         | tt0033752 |
| 1746475499 | 1946 | 1946 | Crack-Up                               | Crack Up                               | Reis, Irving                      | Irving Reis                         | tt0038429 |
| 1746568017 | 1932 | 1932 | The Woman from Monte Carlo             | The Woman from Monte Carlo             | Curtiz, Michael                   | Michael Curtiz                      | tt0023706 |
| 1746502690 | 1916 | 1916 | Lonesome Town                          | Lonesome Town                          | Heffron, Thomas                   | Thomas N. Heffron                   | tt0163067 |
| 1746555275 | 1956 | 1955 | Day the World Ended                    | Day the World Ended                    | Corman, Roger                     | Roger Corman                        | tt0049128 |
| 1746565940 | 1953 | 1953 | Tonight We Sing                        | Tonight We Sing                        | Leisen, "Mitele"                  | Mitchell Leisen                     | tt0046441 |
| 1746571335 | 1910 | 1910 | The Deputy's Love                      | The Deputy's Love                      | Barker, Reginald                  | Gilbert M. 'Broncho Billy' Anderson | tt0372231 |
| 1746582765 | 1937 | 1937 | The Man Who Cried Wolf                 | The Man Who Cried Wolf                 | Foster, Lewis R.                  | Lewis R. Foster                     | tt0029202 |
| 1746491766 | 1947 | 1947 | Along the Oregon Trail                 | Along the Oregon Trail                 | Springsteen, R. G.                | R.G. Springsteen                    | tt0039145 |
| 1746235211 | 1973 | 1973 | Love and Pain and the Whole Damn Thing | Love and Pain and the Whole Damn Thing | Pakula, Alan J.                   | Alan J. Pakula                      | tt0068850 |
| 1746566112 | 1958 | 1958 | The Matchmaker                         | The Matchmaker                         | Anthony, Joseph                   | Joseph Anthony                      | tt0051913 |
| 1746554852 | 1956 | 1956 | The Wild Dakotas                       | The Wild Dakotas                       | Newfield, Sam                     | Sigmund Neufeld                     | tt0049954 |
| 1746503580 | 1919 | 1919 | The Broken Butterfly                   | The Broken Butterfly                   | Tourneur, Maurice                 | Maurice Tourneur                    | tt0009969 |
| 1746465369 | 1942 | 1942 | I Live on Danger                       | I Live on Danger                       | White, Sam                        | Sam White                           | tt0034880 |
| 1746585429 | 1939 | 1939 | Little Accident                        | Little Accident                        | Lamont, Charles                   | Charles Lamont                      | tt0031576 |
| 1746473881 | 1947 | 1947 | Carnegie Hall                          | Carnegie Hall                          | Ulmer, Edgar G.                   | Edgar G. Ulmer                      | tt0039244 |
| 1746453496 | 1943 | 1943 | Pilot #5                               | Pilot #5                               | Sidney, George                    | George Sidney                       | tt0036265 |

|            |      |      |                                |                                |                           |                      |           |
|------------|------|------|--------------------------------|--------------------------------|---------------------------|----------------------|-----------|
| 1746554508 | 1964 | 1964 | The Tattooed Police Horse      | The Tattooed Police Horse      | Landsburgh, Larry         | Larry Lansburgh      | tt1943009 |
| 1746410006 | 1986 | 1986 | Armed and Dangerous            | Armed and Dangerous            | Lester, Mark L.           | Mark L. Lester       | tt0090660 |
| 1746532729 | 1915 | 1915 | Mignon                         | Mignon                         | Nigh, William             | Alexander E. Beyfuss | tt0005743 |
| 1746409800 | 1988 | 1988 | Heartbreak Hotel               | Heartbreak Hotel               | Columbus, Chris           | Chris Columbus       | tt0095288 |
| 1746577703 | 1935 | 1935 | Whipsaw                        | Whipsaw                        | Wood, Sam                 | Sam Wood             | tt0027205 |
| 1746251010 | 1978 | 1978 | The Betsy                      | The Betsy                      | Petrie, Daniel            | Daniel Petrie        | tt0077228 |
| 1746520283 | 1924 | 1924 | Circe the Enchantress          | Circe the Enchantress          | Leonard, Robert Z.        | Robert Z. Leonard    | tt0014774 |
| 1746409429 | 1987 | 1987 | Baby Boom                      | Baby Boom                      | Shyer, Charles            | Charles Shyer        | tt0092605 |
| 1746235414 | 1974 | 1974 | Willie Dynamite                | Willie Dynamite                | Moses, Gilbert            | Gilbert Moses        | tt0072409 |
| 1746533181 | 1928 | 1928 | The Man Who Laughs             | The Man Who Laughs             | Leni, Paul                | Paul Leni            | tt0019130 |
| 1746567592 | 1952 | 1952 | Wild Horse Ambush              | Wild Horse Ambush              | Brannon, Fred C.          | Fred C. Brannon      | tt0128843 |
| 1746503591 | 1918 | 1918 | Restitution                    | Restitution                    | Gaye, Howard              | Howard Gaye          | tt0187452 |
| 1746219745 | 1971 | 1971 | THX 1138                       | THX 1138                       | Lucas, George             | George Lucas         | tt0066434 |
| 1746564972 | 1952 | 1952 | Invitation                     | Invitation                     | Reinhardt, Gottfried      | Gottfried Reinhardt  | tt0044751 |
| 1746582790 | 1935 | 1935 | Ladies Love Danger             | Ladies Love Danger             | Humberstone, H. Bruce     | H. Bruce Humberstone | tt0026594 |
| 1746555079 | 1956 | 1955 | Storm Fear                     | Storm Fear                     | Wilde, Cornel             | Cornel Wilde         | tt0049801 |
| 1746554396 | 1963 | 1963 | Miracle of the White Stallions | Miracle of the White Stallions | Hiller, Arthur            | Arthur Hiller        | tt0057312 |
| 1746569893 | 1957 | 1957 | Hot Summer Night               | Hot Summer Night               | Friedkin, David           | David Friedkin       | tt0050524 |
| 1746503775 | 1919 | 1919 | The Master Man                 | The Master Man                 | Warde, Ernest C.          | Ernest C. Warde      | tt0191270 |
| 1746516269 | 1922 | 1922 | A Question of Honor            | A Question of Honor            | Carewe, Edwin             | Edwin Carewe         | tt0013523 |
| 1746578719 | 1960 | 1960 | Raymie                         | Raymie                         | McDonald, Frank           | Frank McDonald       | tt0054232 |
| 1746583543 | 1930 | 1930 | On the Level                   | On the Level                   | Cummings, Irving          | Irving Cummings      | tt0021209 |
| 1746555977 | 1955 | 1955 | House of Bamboo                | House of Bamboo                | Fuller, Samuel            | Samuel Fuller        | tt0048182 |
| 1746583213 | 1930 | 1930 | Song of the West               | Song of the West               | Enright, Ray              | Ray Enright          | tt0021405 |
| 1746476195 | 1946 | 1946 | Gentlemen with Guns            | Gentlemen with Guns            | Newfield, Sam             | Sam Newfield         | tt0038556 |
| 1769976165 | 1928 | 1928 | Standing Pat                   | Standing Pat                   | Montgomery, Earl T.       | Earl Montgomery      | tt0410663 |
| 1746583664 | 1929 | 1929 | Pioneers of the West           | Pioneers of the West           | McGowan, J. P.            | J.P. McGowan         | tt0020271 |
| 1746585346 | 1929 | 1929 | Protection                     | Protection                     | Stoloff, Benjamin         | Benjamin Stoloff     | tt0020295 |
| 1746581503 | 1951 | 1951 | Korea Patrol                   | Korea Patrol                   | Nosseck, Max              | Max Nosseck          | tt0234052 |
| 1746508748 | 1925 | 1925 | The Midnight Flyer             | The Midnight Flyer             | Forman, Tom               | Tom Forman           | tt0016106 |
| 1746250365 | 1979 | 1979 | Richard Pryor Live in Concert  | Richard Pryor: Live in Concert | Margolis, Jeff            | Jeff Margolis        | tt0079807 |
| 1746492700 | 1944 | 1944 | Texas Masquerade               | Texas Masquerade               | Archainbaud, George       | George Archainbaud   | tt0037360 |
| 1746555654 | 1956 | 1956 | The Last Wagon                 | The Last Wagon                 | Daves, Delmer             | Delmer Daves         | tt0049434 |
| 1746570269 | 1952 | 1952 | Jet Job                        | Jet Job                        | Beaudine, William         | William Beaudine     | tt0044767 |
| 1746438213 | 1941 | 1941 | Roaring Frontiers              | Roaring Frontiers              | Hillyer, Lambert          | Lambert Hillyer      | tt0034118 |
| 1746502800 | 1916 | 1916 | The Five Faults of Flo         | The Five Faults of Flo         | Platt, George Foster      | George Foster Platt  | tt0157650 |
| 1746514280 | 1913 | 1913 | Traffic in Souls               | Traffic in Souls               | Tucker, George Loane      | George Loane Tucker  | tt0003471 |
| 1746453653 | 1945 | 1945 | Night Club Girl                | Night Club Girl                | Cline, Eddie              | Edward F. Cline      | tt0037128 |
| 1746409996 | 1991 | 1991 | Billy Bathgate                 | Billy Bathgate                 | Benton, Robert            | Robert Benton        | tt0101453 |
| 1746197916 | 1969 | 1969 | The Maltese Bippy              | The Maltese Bippy              | Panama, Norman            | Norman Panama        | tt0064627 |
| 1746454476 | 1941 | 1941 | Flight from Destiny            | Flight from Destiny            | Sherman, Vincent          | Vincent Sherman      | tt0033608 |
| 1746504538 | 1918 | 1918 | The Reason Why                 | The Reason Why                 | Vignola, Robert G.        | Robert G. Vignola    | tt0009536 |
| 1745374165 | 2004 | 2004 | Saved!                         | Saved!                         | Dannelly, Brian           | Brian Dannelly       | tt0332375 |
| 1746520216 | 1926 | 1926 | The Wilderness Woman           | The Wilderness Woman           | Higgin, Howard            | Howard Higgin        | tt0017562 |
| 1746500032 | 1949 | 1949 | The Fan                        | The Fan                        | Preminger, Otto           | Otto Preminger       | tt0041346 |
| 1746202875 | 1970 | 1970 | One More Time                  | One More Time                  | Lewis, Jerry              | Jerry Lewis          | tt0066183 |
| 1746219715 | 1979 | 1979 | An Almost Perfect Affair       | An Almost Perfect Affair       | Ritchie, Michael          | Michael Ritchie      | tt0078757 |
| 1746492863 | 1944 | 1944 | Ladies of Washington           | Ladies of Washington           | King, Louis               | Louis King           | tt0036998 |
| 1746198656 | 1969 | 1969 | Hello, Dolly!                  | Hello, Dolly!                  | Kelly, Gene               | Gene Kelly           | tt0064418 |
| 1746503347 | 1921 | 1921 | No Man's Woman                 | No Man's Woman                 | Mack, Wayne; Maloney, Leo | Wayne Mack           | tt0012504 |
| 1746583019 | 1936 | 1936 | I Married a Doctor             | I Married a Doctor             | Mayo, Archie              | Archie Mayo          | tt0027781 |
| 1746583858 | 1930 | 1930 | The Costello Case              | The Costello Case              | Lang, Walter              | Walter Lang          | tt0020792 |
| 1746511816 | 1927 | 1927 | Her Father Said No             | Her Father Said No             | McKeown, Jack             | Jack McKeown         | tt0017980 |
| 1746209275 | 1967 | 1967 | Easy Come, Easy Go             | Easy Come, Easy Go             | Rich, John                | John Rich            | tt0061610 |
| 1746532949 | 1923 | 1923 | Second Fiddle                  | Second Fiddle                  | Tuttle, Frank             | Frank Tuttle         | tt0014452 |
| 1746583799 | 1931 | 1931 | The Man in Possession          | The Man in Possession          | Wood, Sam                 | Sam Wood             | tt0022117 |
| 1769976708 | 1929 | 1929 | When Caesar Ran a Newspaper    | When Caesar Ran a Newspaper    | Graham, Walter            | Walter Graham        | tt0020578 |



|            |      |      |                                       |                                         |                                  |                     |           |
|------------|------|------|---------------------------------------|-----------------------------------------|----------------------------------|---------------------|-----------|
| 1746454666 | 1946 | 1946 | Red River Renegades                   | Red River Renegades                     | Carr, Thomas                     | Thomas Carr         | tt0038874 |
| 1746484698 | 1917 | 1917 | Corruption                            | Corruption                              | Gorman, Jack                     | John Gorman         | tt0168609 |
| 1746581252 | 1961 | 1961 | Once Upon a Knight                    | Once Upon a Knight                      |                                  |                     | tt0244113 |
| 1746504147 | 1921 | 1921 | Big Town Ideas                        | Big Town Ideas                          | Harbaugh, Carl                   | Carl Harbaugh       | tt0011969 |
| 1746525114 | 1920 | 1920 | The Gauntlet                          | The Gauntlet                            | Hollywood, Edwin L.              | Edwin L. Hollywood  | tt0195739 |
| 1746509439 | 1924 | 1924 | The Signal Tower                      | The Signal Tower                        | Brown, Clarence L.               | Clarence Brown      | tt0015331 |
| 1746394188 | 1987 | 1987 | Tin Men                               | Tin Men                                 | Levinson, Barry                  | Barry Levinson      | tt0094155 |
| 1746524999 | 1915 | 1915 | An Arizona Wooing                     | An Arizona Wooing                       | Mix, Tom                         | Tom Mix             | tt0004908 |
| 1746530806 | 1949 | 1949 | Barbary Pirate                        | Barbary Pirate                          | Landers, Lew                     | Lew Landers         | tt0041156 |
| 1745293794 | 2005 | 2004 | Melinda and Melinda                   | Melinda and Melinda                     | Allen, Woody                     | Woody Allen         | tt0378947 |
| 1746577399 | 1951 | 1951 | Lawless Cowboys                       | Lawless Cowboys                         | Collins, Lewis                   | Lewis D. Collins    | tt0043729 |
| 1746465180 | 1942 | 1942 | My Favorite Spy                       | My Favorite Spy                         | Garnett, Tay                     | Tay Garnett         | tt0035102 |
| 1746437396 | 1943 | 1943 | Overland Mail Robbery                 | Overland Mail Robbery                   | English, John                    | John English        | tt0036243 |
| 1746465419 | 1942 | 1941 | The Corsican Brothers                 | The Corsican Brothers                   | Ratoff, Gregory                  | Gregory Ratoff      | tt0033490 |
| 1746508882 | 1949 | 1949 | Knock on Any Door                     | Knock on Any Door                       | Ray, Nicholas                    | Nicholas Ray        | tt0041555 |
| 1746577462 | 1961 | 1961 | Underworld U. S. A.                   | Underworld U.S.A.                       | Fuller, Samuel                   | Samuel Fuller       | tt0055571 |
| 1746437023 | 1942 | 1942 | Gentleman Jim                         | Gentleman Jim                           | Walsh, Raoul                     | Raoul Walsh         | tt0034778 |
| 1746585493 | 1939 | 1939 | Espionage Agent                       | Espionage Agent                         | Bacon, Lloyd                     | Lloyd Bacon         | tt0031280 |
| 1746503243 | 1918 | 1918 | A Burglar for a Night                 | A Burglar for a Night                   | Warde, Ernest C.                 | Ernest C. Warde     | tt0008941 |
| 1746582300 | 1930 | 1930 | The Girl of the Golden West           | The Girl of the Golden West             | Dillon, John Francis             | John Francis Dillon | tt0020921 |
| 1745374588 | 2010 | 2009 | Rosencrantz & Guildenstern Are Undead | Rosencrantz and Guildenstern Are Undead | Galland, Jordan                  | Jordan Galland      | tt1122775 |
| 1746532642 | 1915 | 1915 | The Family Cupboard                   | The Family Cupboard                     | Crane, Frank                     | Frank Hall Crane    | tt0005300 |
| 1745341867 | 2010 | 2010 | The Sorcerer's Apprentice             | The Sorcerer's Apprentice               | Turteltaub, Jon                  | Jon Turteltaub      | tt0963966 |
| 1746465090 | 1946 | 1946 | Strange Voyage                        | Strange Voyage                          | Allen, Irving                    | Irving Allen        | tt0038127 |
| 1746453660 | 1998 | 1998 | Shakespeare in Love                   | Shakespeare in Love                     | Madden, John                     | John Madden         | tt0138097 |
| 1746410731 | 1986 | 1986 | The Manhattan Project                 | The Manhattan Project                   | Brickman, Marshall               | Marshall Brickman   | tt0091472 |
| 1745293758 | 2007 | 2007 | I Am Legend                           | I Am Legend                             | Lawrence, Francis                | Francis Lawrence    | tt0480249 |
| 1745342268 | 2001 | 2001 | Jurassic Park III                     | Jurassic Park III                       | Johnston, Joe                    | Joe Johnston        | tt0163025 |
| 1746503629 | 1918 | 1918 | I Love You                            | I Love You                              | Edwards, Walter                  | Walter Edwards      | tt0009217 |
| 1745293954 | 2007 | 2007 | The Heartbreak Kid                    | The Heartbreak Kid                      | Farrelly, Peter; Farrelly, Bobby | Bobby Farrelly      | tt0408839 |
| 1746563832 | 1953 | 1953 | The Bigamist                          | The Bigamist                            | Lupino, Ida                      | Ida Lupino          | tt0045557 |
| 1746566015 | 1958 | 1958 | Night of the Blood Beast              | Night of the Blood Beast                | Kowalski, Bernard L.             | Bernard L. Kowalski | tt0051993 |
| 1746454496 | 1945 | 1945 | Hit the Hay                           | Hit the Hay                             | Lord, Del                        | Del Lord            | tt0038603 |
| 1746572962 | 1932 | 1932 | The Heart of New York                 | The Heart of New York                   | LeRoy, Mervyn                    | Mervyn LeRoy        | tt0021829 |
| 1746577343 | 1962 | 1962 | Who's Got the Action?                 | Who's Got the Action?                   | Mann, Daniel                     | Daniel Mann         | tt0056691 |
| 1746575399 | 1931 | 1931 | Ghost Parade                          | Ghost Parade                            | Sennett, Mack                    | Mack Sennett        | tt0228331 |
| 1746235336 | 1978 | 1978 | Ice Castles                           | Ice Castles                             | Wrye, Donald                     | Donald Wrye         | tt0077716 |
| 1746504186 | 1920 | 1920 | Circumstantial Evidence               | Circumstantial Evidence                 | Collins, Tom                     | Tom Collins         | tt0187787 |
| 1745309630 | 2006 | 2006 | Rocky Balboa                          | Rocky Balboa                            | Stallone, Sylvester              | Sylvester Stallone  | tt0479143 |
| 1746503012 | 1923 | 1923 | Suzanna                               | Suzanna                                 | Jones, F. Richard                | F. Richard Jones    | tt0014522 |
| 1746498254 | 1918 | 1918 | For Husbands Only                     | For Husbands Only                       | Weber, Lois; Smalley, Phillips   | Phillips Smalley    | tt0009084 |
| 1746569761 | 1955 | 1955 | To Catch a Thief                      | To Catch a Thief                        | Hitchcock, Alfred                | Alfred Hitchcock    | tt0048728 |
| 1746570097 | 1933 | 1933 | Deluge                                | Deluge                                  | Feist, Felix E.                  | Felix E. Feist      | tt0023938 |
| 1746437554 | 1996 | 1996 | Trigger Effect                        | The Trigger Effect                      | Koepp, David                     | David Koepp         | tt0117965 |
| 1746408683 | 1992 | 1992 | Used People                           | Used People                             | Kidron, Beeban                   | Beeban Kidron       | tt0105706 |
| 1746437425 | 1941 | 1941 | Billy the Kid Wanted                  | Billy the Kid Wanted                    | Scott, Sherman                   | Sam Newfield        | tt0033391 |
| 1746582295 | 1931 | 1931 | Sundown Trail                         | Sundown Trail                           | Hill, Robert F.                  | Robert F. Hill      | tt0022449 |
| 1746578735 | 1959 | 1959 | Battle of the Coral Sea               | Battle of the Coral Sea                 | Wendkos, Paul                    | Paul Wendkos        | tt0052606 |
| 1746473661 | 1947 | 1947 | Messenger of Peace                    | Messenger of Peace                      | Strayer, Frank                   | Frank R. Strayer    | tt0042728 |
| 1746208418 | 1966 | 1966 | Wild, Wild Winter                     | Wild Wild Winter                        | Weinrib, Lennie                  | Lennie Weinrib      | tt0061194 |
| 1746580721 | 1937 | 1937 | The Girl Said No                      | The Girl Said No                        | Stone, Andrew                    | Andrew L. Stone     | tt0028931 |
| 1746577528 | 1933 | 1933 | The Keyhole                           | The Keyhole                             | Curtiz, Michael                  | Michael Curtiz      | tt0024211 |
| 1746420131 | 1993 | 1993 | Indecent Proposal                     | Indecent Proposal                       | Lyne, Adrian                     | Adrian Lyne         | tt0107211 |
| 1746500017 | 1949 | 1949 | Chicken Every Sunday                  | Chicken Every Sunday                    | Seaton, George                   | George Seaton       | tt0040229 |
| 1746580543 | 1936 | 1936 | The Longest Night                     | The Longest Night                       | Taggart, Errol                   | Errol Taggart       | tt0027906 |
| 1746200051 | 1967 | 1967 | Nude Restaurant                       | The Nude Restaurant                     | Warhol, Andy                     | Andy Warhol         | tt0062055 |
| 1746574970 | 1934 | 1934 | Drums O' Voodoo                       | Drums o' Voodoo                         | Hoerl, Arthur                    | Arthur Hoerl        | tt0025072 |

|            |      |      |                                  |                                  |                     |                      |           |
|------------|------|------|----------------------------------|----------------------------------|---------------------|----------------------|-----------|
| 1746571665 | 1931 | 1931 | Cavalier of the West             | Cavalier of the West             | McCarthy, John P.   | John P. McCarthy     | tt0021726 |
| 1746582958 | 1935 | 1935 | Front Page Woman                 | Front Page Woman                 | Curtiz, Michael     | Michael Curtiz       | tt0026388 |
| 1746500114 | 1924 | 1924 | Hail the Hero                    | Hail the Hero                    | Horne, James W.     | James W. Horne       | tt0398092 |
| 1746513626 | 1916 | 1916 | Artie, the Millionaire Kid       | Artie, the Millionaire Kid       | Handworth, Harry    | Harry Handworth      | tt0157329 |
| 1746520697 | 1925 | 1925 | Three Wise Crooks                | Three Wise Crooks                | Weight, F. Harmon   | F. Harmon Weight     | tt0016427 |
| 1745374773 | 2009 | 2008 | Looking for Palladin             | Looking for Palladin             | Krakowski, Andrzej  | Andrzej Krakowski    | tt0882113 |
| 1746465045 | 1943 | 1943 | True to Life                     | True to Life                     | Marshall, George    | George Marshall      | tt0036461 |
| 1746574739 | 1935 | 1935 | Between Men                      | Between Men                      | Bradbury, Robert N. | Robert N. Bradbury   | tt0024883 |
| 1746218895 | 1980 | 1980 | The Boogey Man                   | The Boogey Man                   | Lommel, Ulli        | Ulli Lommel          | tt0080464 |
| 1746581812 | 1930 | 1930 | The Third Alarm                  | The Third Alarm                  | Johnson, Emory      | Emory Johnson        | tt0021465 |
| 1746439466 | 1996 | 1996 | Twister                          | Twister                          | de Bont, Jan        | Jan de Bont          | tt0117998 |
| 1746455697 | 2000 | 2000 | The Ballad of Ramblin' Jack      | The Ballad of Ramblin' Jack      | Elliott, Aiyana     | Aiyana Elliott       | tt0236008 |
| 1746577840 | 1935 | 1935 | Oil for the Lamps of China       | Oil for the Lamps of China       | LeRoy, Mervyn       | Mervyn LeRoy         | tt0026805 |
| 1746574475 | 1952 | 1952 | Scorching Fury                   | Scorching Fury                   | Freers, Rick        | Rick Freers          | tt0228825 |
| 1746514764 | 1915 | 1915 | Jane                             | Jane                             | Lloyd, Frank        | Frank Lloyd          | tt0005561 |
| 1746475750 | 1943 | 1943 | Tarzan Triumphs                  | Tarzan Triumphs                  | Thiele, William     | Wilhelm Thiele       | tt0036414 |
| 1746198150 | 1967 | 1966 | The Really Big Family            | The Really Big Family            | Grasshoff, Alex     | Alexander Grasshoff  | tt0062180 |
| 1746509355 | 1949 | 1949 | Flaming Fury                     | Flaming Fury                     | Blair, George       | George Blair         | tt0041372 |
| 1746421350 | 1991 | 1991 | Hot Shots!                       | Hot Shots!                       | Abrahams, Jim       | Jim Abrahams         | tt0102059 |
| 1746584122 | 1936 | 1936 | Treachery Rides the Range        | Treachery Rides the Range        | McDonald, Frank     | Frank McDonald       | tt0028407 |
| 1746573733 | 1956 | 1956 | Man in the Vault                 | Man in the Vault                 | McLaglen, Andrew V. | Andrew V. McLaglen   | tt0049476 |
| 1746584041 | 1939 | 1939 | Mountain Rhythm                  | Mountain Rhythm                  | Eason, B. Reeves    | B. Reeves Eason      | tt0031674 |
| 1746577437 | 1962 | 1962 | In Search of the Castaways       | In Search of the Castaways       | Stevenson, Robert   | Robert Stevenson     | tt0056095 |
| 1746408887 | 1985 | 1985 | Back to the Future               | Back to the Future               | Zemeckis, Robert    | Robert Zemeckis      | tt0088763 |
| 1746503553 | 1918 | 1918 | Ashes of Love                    | Ashes of Love                    | Abramson, Ivan      | Ivan Abramson        | tt0008849 |
| 1746512108 | 1923 | 1922 | The Third Alarm                  | The Third Alarm                  | Johnson, Emory      | Emory Johnson        | tt0013668 |
| 1746219227 | 1972 | 1971 | Luminous Procuress               | Luminous Procuress               | Arnold, Steven      | Steven Arnold        | tt0163727 |
| 1746576970 | 1951 | 1950 | At War with the Army             | At War with the Army             | Walker, Hal         | Hal Walker           | tt0042209 |
| 1746423969 | 1941 | 1941 | Dressed to Kill                  | Dressed to Kill                  | Forde, Eugene       | Eugene Forde         | tt0033558 |
| 1746524097 | 1915 | 1915 | The House of a Thousand Scandals | The House of a Thousand Scandals | Ricketts, Thomas    | Tom Ricketts         | tt0005518 |
| 1746569858 | 1957 | 1957 | The 27th Day                     | The 27th Day                     | Asher, William      | William Asher        | tt0050085 |
| 1746454925 | 1941 | 1941 | Bachelor Daddy                   | Bachelor Daddy                   | Young, Harold       | Harold Young         | tt0033364 |
| 1746582483 | 1938 | 1938 | City Streets                     | City Streets                     | Rogell, Albert S.   | Albert S. Rogell     | tt0029996 |
| 1746577545 | 1935 | 1935 | Courage of the North             | Courage of the North             | Emmett, Robert      | Robert Emmett Tansey | tt0026240 |
| 1746234602 | 1967 | 1967 | Ulysses                          | Ulysses                          | Strick, Joseph      | Joseph Strick        | tt0062414 |
| 1746249780 | 1979 | 1979 | Nightwing                        | Nightwing                        | Hiller, Arthur      | Arthur Hiller        | tt0079631 |
| 1746465287 | 1942 | 1942 | The Magnificent Dope             | The Magnificent Dope             | Lang, Walter        | Walter Lang          | tt0035016 |
| 1746424435 | 1941 | 1941 | Wide Open Town                   | Wide Open Town                   | Selander, Lesley    | Lesley Selander      | tt0034391 |
| 1746554890 | 1955 | 1955 | Crashout                         | Crashout                         | Foster, Lewis R.    | Lewis R. Foster      | tt0047958 |
| 1745359679 | 2003 | 2003 | The Hunted                       | The Hunted                       | Friedkin, William   | William Friedkin     | tt0269347 |
| 1746423489 | 1995 | 1995 | The Quick and the Dead           | The Quick and the Dead           | Raimi, Sam          | Sam Raimi            | tt0114214 |
| 1746572580 | 1932 | 1932 | Hell's House                     | Hell's House                     | Higgin, Howard      | Howard Higgin        | tt0022991 |
| 1746421338 | 1992 | 1992 | Love Field                       | Love Field                       | Kaplan, Jonathan    | Jonathan Kaplan      | tt0104765 |
| 1745293619 | 2006 | 2006 | American Hardcore                | American Hardcore                | Rachman, Paul       | Paul Rachman         | tt0419434 |
| 1746455800 | 1997 | 1997 | The Beautician and the Beast     | The Beautician and the Beast     | Kwapis, Ken         | Ken Kwapis           | tt0118691 |
| 1746583329 | 1930 | 1930 | Borrowed Wives                   | Borrowed Wives                   | Strayer, Frank      | Frank R. Strayer     | tt0020703 |
| 1746438941 | 1942 | 1942 | The Courtship of Andy Hardy      | The Courtship of Andy Hardy      | Seitz, George B.    | George B. Seitz      | tt0034618 |
| 1746474075 | 1947 | 1947 | The Fabulous Joe                 | The Fabulous Joe                 | Foster, Harve       | Harve Foster         | tt0039366 |
| 1746583743 | 1929 | 1929 | The Virginian                    | The Virginian                    | Fleming, Victor     | Victor Fleming       | tt0020556 |
| 1746566745 | 1933 | 1933 | Dancing Lady                     | Dancing Lady                     | Leonard, Robert Z.  | Robert Z. Leonard    | tt0023926 |
| 1746570614 | 1952 | 1952 | My Pal Gus                       | My Pal Gus                       | Parrish, Robert     | Robert Parrish       | tt0044939 |
| 1746583045 | 1938 | 1938 | Safety in Numbers                | Safety in Numbers                | St. Clair, Malcolm  | Malcolm St. Clair    | tt0030707 |
| 1746574643 | 1935 | 1935 | Fang and Claw                    | Fang and Claw                    | Buck, Frank         | Frank Buck           | tt0026337 |
| 1746258566 | 1979 | 1979 | North Dallas Forty               | North Dallas Forty               | Kotcheff, Ted       | Ted Kotcheff         | tt0079640 |
| 1746422537 | 1999 | 1998 | 20 Dates                         | 20 Dates                         | Berkowitz, Myles    | Myles Berkowitz      | tt0138987 |
| 1746524562 | 1914 | 1914 | Under the Gaslight               | Under the Gaslight               | Marston, Lawrence   | Lawrence Marston     | tt0004749 |
| 1746567090 | 1932 | 1932 | Arsène Lupin                     | Arsène Lupin                     | Conway, Jack        | Jack Conway          | tt0022639 |

|            |      |      |                               |                               |                                       |                      |           |
|------------|------|------|-------------------------------|-------------------------------|---------------------------------------|----------------------|-----------|
| 1746574972 | 1935 | 1935 | The Lost City                 | The Lost City                 | Revier, Harry; Cohen, Ben; Dillon, Ro | Harry Revier         | tt0955292 |
| 1746513209 | 1927 | 1926 | Camille                       | Camille                       | Niblo, Fred                           | Ralph Barton         | tt0929410 |
| 1746465070 | 1941 | 1941 | Suspicion                     | Suspicion                     | Hitchcock, Alfred                     | Alfred Hitchcock     | tt0034248 |
| 1746235532 | 1977 | 1977 | For the Love of Benji         | For the Love of Benji         | Camp, Joe                             | Joe Camp             | tt0076044 |
| 1746497662 | 1920 | 1920 | Do the Dead Talk?             | Do the Dead Talk?             | MacCullough, Jack                     | Jack MacCullough     | tt0191963 |
| 1746582896 | 1938 | 1938 | Inside Nazi Germany           | Inside Nazi Germany           | Bryan, Julien                         | Jack Glenn           | tt0131471 |
| 1746455430 | 1996 | 1996 | Mars Attacks!                 | Mars Attacks!                 | Burton, Tim                           | Tim Burton           | tt0116996 |
| 1746570733 | 1934 | 1934 | Once to Every Bachelor        | Once to Every Bachelor        | Nigh, William                         | William Nigh         | tt0025595 |
| 1746491975 | 1948 | 1948 | If You Knew Susie             | If You Knew Susie             | Douglas, Gordon M.                    | Gordon Douglas       | tt0040464 |
| 1746520507 | 1927 | 1927 | A One Man Game                | A One Man Game                | Laemmle, Ernst                        | Ernst Laemmle        | tt0018229 |
| 1745341871 | 2002 | 2002 | 40 Days and 40 Nights         | 40 Days and 40 Nights         | Lehmann, Michael                      | Michael Lehmann      | tt0243736 |
| 1746555440 | 1957 | 1957 | The Undead                    | The Undead                    | Corman, Roger                         | Roger Corman         | tt0051128 |
| 1746393311 | 1988 | 1987 | Border Radio                  | Border Radio                  | Anders, Allison; Lent, Dean; Voss, Ku | Allison Anders       | tt0090766 |
| 1746501239 | 1916 | 1916 | The Beggar of Cawnpore        | The Beggar of Cawnpore        | Swickard, Charles                     | Charles Swickard     | tt0006412 |
| 1745342329 | 2008 | 2008 | An American Carol             | An American Carol             | Zucker, David                         | David Zucker         | tt1190617 |
| 1746574885 | 1937 | 1937 | The Wildcatter                | The Wildcatter                | Collins, Lewis D.                     | Lewis D. Collins     | tt0029780 |
| 1746455599 | 1997 | 1997 | The Lost World: Jurassic Park | The Lost World: Jurassic Park | Spielberg, Steven                     | Steven Spielberg     | tt0119567 |
| 1746410670 | 1985 | 1985 | Fletch                        | Fletch                        | Ritchie, Michael                      | Michael Ritchie      | tt0089155 |
| 1746584325 | 1937 | 1937 | On Again--Off Again           | On Again Off Again            | Cline, Edward                         | Edward F. Cline      | tt0029343 |
| 1746577248 | 1963 | 1963 | McLintock!                    | McLintock!                    | McLaglen, Andrew V.                   | Andrew V. McLaglen   | tt0057298 |
| 1746577780 | 1937 | 1937 | Topper                        | Topper                        | McLeod, Norman Z.                     | Norman Z. McLeod     | tt0029682 |
| 1746583460 | 1928 | 1928 | The Cossacks                  | The Cossacks                  | Hill, George                          | George W. Hill       | tt0018795 |
| 1746483179 | 1917 | 1917 | The Man Who Took a Chance     | The Man Who Took a Chance     | Worthington, William                  | William Worthington  | tt0008257 |
| 1746497270 | 1918 | 1918 | Empty Pockets                 | Empty Pockets                 | Brenon, Herbert                       | Herbert Brenon       | tt0007887 |
| 1746513471 | 1927 | 1927 | The Brute                     | The Brute                     | Cummings, Irving                      | Irving Cummings      | tt0017711 |
| 1746575001 | 1936 | 1936 | The Gentleman from Louisiana  | The Gentleman from Louisiana  | Pichel, Irving                        | Irving Pichel        | tt0027668 |
| 1746584053 | 1935 | 1935 | Splendor                      | Splendor                      | Nugent, Elliott                       | Elliott Nugent       | tt0027033 |
| 1746582282 | 1950 | 1950 | Tripoli                       | Tripoli                       | Price, Will                           | Will Price           | tt0043072 |
| 1746524285 | 1927 | 1927 | The Country Doctor            | The Country Doctor            | Julian, Rupert                        | Rupert Julian        | tt0017776 |
| 1746420751 | 1988 | 1988 | Midnight Crossing             | Midnight Crossing             | Holzberg, Roger                       | Roger Holzberg       | tt0095629 |
| 1746578913 | 1960 | 1960 | Flaming Star                  | Flaming Star                  | Siegel, Don                           | Don Siegel           | tt0053825 |
| 1746573772 | 1960 | 1960 | 13 Ghosts                     | 13 Ghosts                     | Castle, William                       | William Castle       | tt0053559 |
| 1746486143 | 1919 | 1919 | In Mizzoura                   | In Mizzoura                   | Ford, Hugh                            | Hugh Ford            | tt0010290 |
| 1746514886 | 1915 | 1915 | The Ring of the Borgias       | The Ring of the Borgias       | West, Langdon                         | Langdon West         | tt0005970 |
| 1746545144 | 1940 | 1940 | Her First Romance             | Her First Romance             | Dmytryk, Edward                       | Edward Dmytryk       | tt0032581 |
| 1746583620 | 1930 | 1930 | Her Man                       | Her Man                       | Garnett, Tay                          | Tay Garnett          | tt0020966 |
| 1746424221 | 1941 | 1941 | My Life with Caroline         | My Life with Caroline         | Milestone, Lewis                      | Lewis Milestone      | tt0033932 |
| 1746581142 | 1960 | 1960 | Young Jesse James             | Young Jesse James             | Claxton, William                      | William F. Claxton   | tt0054489 |
| 1746577695 | 1936 | 1936 | The Crime of Dr. Forbes       | The Crime of Dr. Forbes       | Marshall, George                      | George Marshall      | tt0027480 |
| 1746483885 | 1918 | 1918 | Fields of Honor               | Fields of Honor               | Ince, Ralph W.                        | Ralph Ince           | tt0184469 |
| 1746567280 | 1952 | 1952 | Gobs and Gals                 | Gobs and Gals                 | Springsteen, R. G.                    | R.G. Springsteen     | tt0044666 |
| 1746568146 | 1933 | 1933 | Mr. Skitch                    | Mr. Skitch                    | Cruze, James                          | James Cruze          | tt0024358 |
| 1746581990 | 1951 | 1951 | The Son of Dr. Jekyll         | The Son of Dr. Jekyll         | Friedman, Seymour                     | Seymour Friedman     | tt0044061 |
| 1746511802 | 1915 | 1915 | Excuse Me                     | Excuse Me                     | Savage, Henry W.                      | Henry W. Savage      | tt0005257 |
| 1746509534 | 1924 | 1924 | Beaten                        | Beaten                        | Moody, H. G.                          | Harry Moody          | tt0317125 |
| 1746520101 | 1926 | 1926 | The Devil's Partner           | The Devil's Partner           | Becker, Frederick                     | Fred Becker          | tt1493242 |
| 1746249041 | 1975 | 1974 | Female Trouble                | Female Trouble                | Waters, John                          | John Waters          | tt0072979 |
| 1746500105 | 1948 | 1948 | Panhandle                     | Panhandle                     | Selander, Leslie                      | Lesley Selander      | tt0033996 |
| 1746575003 | 1935 | 1935 | Westward Ho                   | Westward Ho                   | Bradbury, R. N.                       | Robert N. Bradbury   | tt0027200 |
| 1746575072 | 1935 | 1935 | The Test                      | The Test                      | Ray, Bernard B.                       | Bernard B. Ray       | tt0183879 |
| 1769970767 | 1912 | 1912 | Two Men and the Law           | Two Men and the Law           |                                       |                      | tt0360120 |
| 1746250751 | 1980 | 1980 | The Ninth Configuration       | The Ninth Configuration       | Blatty, William Peter                 | William Peter Blatty | tt0081237 |
| 1746513411 | 1916 | 1916 | His Brother's Wife            | His Brother's Wife            | Knoles, Harley                        | Harley Knoles        | tt0157756 |
| 1746435427 | 1998 | 1998 | The Siege                     | The Siege                     | Zwick, Edward                         | Edward Zwick         | tt0133952 |
| 1746492572 | 1946 | 1946 | That Man of Mine              | That Man of Mine              | Anderson, Leonard                     | Leonard Anderson     | tt0135671 |
| 1746464883 | 1941 | 1941 | Wanderers of the West         | Wanderers of the West         | Hill, Robert F.                       | Robert F. Hill       | tt0034371 |
| 1746567093 | 1933 | 1933 | Doctor Bull                   | Doctor Bull                   | Ford, John                            | John Ford            | tt0023955 |

|            |      |      |                             |                             |                                         |                      |           |
|------------|------|------|-----------------------------|-----------------------------|-----------------------------------------|----------------------|-----------|
| 1746566240 | 1957 | 1957 | The Wayward Bus             | The Wayward Bus             | Vicas, Victor                           | Victor Vicas         | tt0051182 |
| 1746486153 | 1917 | 1917 | To the Death                | To the Death                | King, Burton L.                         | Burton L. King       | tt0008683 |
| 1746570361 | 1934 | 1934 | Blind Date                  | Blind Date                  | Neill, Roy William                      | Roy William Neill    | tt0024897 |
| 1769969693 | 1911 | 1911 | Little Red Riding Hood      | Little Red Riding Hood      | Tucker, George Loane; Kirkwood, Jar     | James Kirkwood       | tt0001738 |
| 1746570585 | 1934 | 1934 | Midnight Alibi              | Midnight Alibi              | Crosland, Alan                          | Alan Crosland        | tt0025500 |
| 1746532415 | 1910 | 1910 | A Western Romance           | A Western Romance           |                                         | Edwin S. Porter      | tt0372608 |
| 1746514669 | 1915 | 1915 | The Arab                    | The Arab                    | DeMille, Cecil B.                       | Cecil B. DeMille     | tt0004905 |
| 1746235009 | 1976 | 1976 | Eat My Dust                 | Eat My Dust                 | Griffith, Charles B.                    | Charles B. Griffith  | tt0074454 |
| 1746577090 | 1950 | 1950 | Short Grass                 | Short Grass                 | Selander, Lesley                        | Lesley Selander      | tt0042956 |
| 1746394206 | 1986 | 1986 | No Mercy                    | No Mercy                    | Pearce, Richard                         | Richard Pearce       | tt0091637 |
| 1746465106 | 1945 | 1944 | I'll Be Seeing You          | I'll Be Seeing You          | Dieterle, William                       | William Dieterle     | tt0036940 |
| 1746578755 | 1951 | 1951 | The Scarf                   | The Scarf                   | Dupont, E. A.                           | Ewald André Dupont   | tt0043998 |
| 1746582921 | 1934 | 1934 | Wake Up and Dream           | Wake Up and Dream           | Neumann, Kurt                           | Kurt Neumann         | tt0025955 |
| 1746577907 | 1938 | 1938 | Stolen Heaven               | Stolen Heaven               | Stone, Andrew L.                        | Andrew L. Stone      | tt0030796 |
| 1746581418 | 1951 | 1951 | Valentino                   | Valentino                   | Allen, Lewis                            | Lewis Allen          | tt0044177 |
| 1746582811 | 1938 | 1938 | Sex Madness                 | Sex Madness                 |                                         | Dwain Esper          | tt0147467 |
| 1746520751 | 1925 | 1925 | Scarlet Saint               | Scarlet Saint               | Archainbaud, George                     | George Archainbaud   | tt0016319 |
| 1746569824 | 1960 | 1960 | Let's Make Love             | Let's Make Love             | Cukor, George                           | George Cukor         | tt0054022 |
| 1746486460 | 1919 | 1919 | Paid in Advance             | Paid in Advance             | Holubar, Allen                          | Allen Holubar        | tt0010547 |
| 1746585266 | 1928 | 1928 | Comrades                    | Comrades                    | Wheeler, Cliff                          | Cliff Wheeler        | tt0018786 |
| 1746520709 | 1949 | 1949 | The Life of Riley           | The Life of Riley           | Brecher, Irving                         | Irving Brecher       | tt0041590 |
| 1769970584 | 1968 | 1968 | The Bizarre Ones            | The Bizarre Ones            | Sullivan, Ron                           | Henri Pachard        | tt0211261 |
| 1746235079 | 1974 | 1974 | The Terminal Man            | The Terminal Man            | Hodges, Mike                            | Mike Hodges          | tt0072267 |
| 1746582197 | 1929 | 1929 | The Lost Zeppelin           | The Lost Zeppelin           | Sloman, Edward                          | Edward Sloman        | tt0020109 |
| 1746574734 | 1933 | 1933 | Hold Your Man               | Hold Your Man               | Wood, Sam                               | Sam Wood             | tt0024130 |
| 1746581722 | 1930 | 1930 | Puttin' on the Ritz         | Puttin' on the Ritz         | Sloman, Edward                          | Edward Sloman        | tt0021276 |
| 1746256617 | 1978 | 1977 | The Pack                    | The Pack                    | Clouse, Robert                          | Robert Clouse        | tt0076516 |
| 1746208251 | 1969 | 1969 | My Side of the Mountain     | My Side of the Mountain     | Clark, James B.                         | James B. Clark       | tt0064708 |
| 1746583346 | 1950 | 1949 | The Hasty Heart             | The Hasty Heart             | Sherman, Vincent                        | Vincent Sherman      | tt0041445 |
| 1746454096 | 1943 | 1943 | Adventure in Iraq           | Adventure in Iraq           | Lederman, D. Ross                       | D. Ross Lederman     | tt0035610 |
| 1746571360 | 1933 | 1933 | Moonlight and Pretzels      | Moonlight and Pretzels      | Freund, Karl                            | Karl Freund          | tt0024348 |
| 1746501598 | 1916 | 1916 | Diamonds Are Trumps         | Diamonds Are Trumps         | Daly, William Robert                    | William Robert Daly  | tt0441202 |
| 1746504372 | 1919 | 1919 | Male and Female             | Male and Female             | DeMille, Cecil B.                       | Cecil B. DeMille     | tt0010418 |
| 1745340928 | 2003 | 2003 | Lost in Translation         | Lost in Translation         | Coppola, Sofia                          | Sofia Coppola        | tt0335266 |
| 1746555720 | 1956 | 1956 | The Burning Hills           | The Burning Hills           | Heisler, Stuart                         | Stuart Heisler       | tt0049036 |
| 1746210783 | 1972 | 1972 | The Thing with Two Heads    | The Thing with Two Heads    | Frost, Lee                              | Lee Frost            | tt0069372 |
| 1746554199 | 1964 | 1964 | Blood on the Arrow          | Blood on the Arrow          | Salkow, Sidney                          | Sidney Salkow        | tt0057891 |
| 1746514628 | 1916 | 1916 | Mister 44                   | Mister 44                   | Otto, Henry                             | Henry Otto           | tt0007082 |
| 1746436562 | 1941 | 1941 | The Driftin' Kid            | The Driftin' Kid            | Tansey, Robert                          | Robert Emmett Tansey | tt0033559 |
| 1746582273 | 1929 | 1929 | Oh, Yeah                    | Oh, Yeah?                   | Garnett, Tay                            | Tay Garnett          | tt0020234 |
| 1746491820 | 1946 | 1946 | Dick Tracy vs. Cueball      | Dick Tracy vs. Cueball      | Douglas, Gordon M.                      | Gordon Douglas       | tt0038478 |
| 1746577301 | 1959 | 1959 | Say One for Me              | Say One for Me              | Tashlin, Frank                          | Frank Tashlin        | tt0053245 |
| 1746423349 | 1994 | 1994 | Spanking the Monkey         | Spanking the Monkey         | Russell, David O.                       | David O. Russell     | tt0111252 |
| 1746581855 | 1928 | 1928 | A Perfect Gentleman         | A Perfect Gentleman         | Bruckman, Clyde                         | Clyde Bruckman       | tt0019265 |
| 1746491791 | 1946 | 1946 | Under Nevada Skies          | Under Nevada Skies          | McDonald, Frank                         | Frank McDonald       | tt0039064 |
| 1746584110 | 1939 | 1939 | Rulers of the Sea           | Rulers of the Sea           | Lloyd, Frank                            | Frank Lloyd          | tt0031883 |
| 1746454832 | 1942 | 1942 | Night in New Orleans        | Night in New Orleans        | Clemens, William                        | William Clemens      | tt0035126 |
| 1746487775 | 1919 | 1919 | The Bramble Bush            | The Bramble Bush            | Terriss, Tom                            | Tom Terriss          | tt0009959 |
| 1745341320 | 2003 | 2003 | Elf                         | Elf                         | Favreau, Jon                            | Jon Favreau          | tt0319343 |
| 1746500474 | 1926 | 1926 | The Palace of Pleasure      | The Palace of Pleasure      | Flynn, Emmett                           | Emmett J. Flynn      | tt0017243 |
| 1746581122 | 1961 | 1961 | Summer and Smoke            | Summer and Smoke            | Glennville, Peter                       | Peter Glennville     | tt0055489 |
| 1746520108 | 1925 | 1925 | Scar Hanan                  | Scar Hanan                  | Wilson, Ben; Linden, Eddie; Cunliffe, [ | Donald Cunliffe      | tt0016317 |
| 1746583010 | 1940 | 1940 | One Million B.C.            | One Million B.C.            | Roach, Hal; Roach, Hal                  | Hal Roach Jr.        | tt0032871 |
| 1746185342 | 1965 | 1965 | The Beast That Killed Women | The Beast That Killed Women | Mahon, Barry                            | Barry Mahon          | tt0058955 |
| 1746500913 | 1910 | 1910 | The Motion Picture Man      | The Motion Picture Man      |                                         |                      | tt1804647 |
| 1746570020 | 1952 | 1952 | Stars and Stripes Forever   | Stars and Stripes Forever   | Koster, Henry                           | Henry Koster         | tt0045187 |
| 1746583112 | 1935 | 1935 | Honeymoon, Limited          | Honeymoon Limited           | Lubin, Arthur                           | Arthur Lubin         | tt0026487 |

|            |      |      |                             |                             |                                  |                      |           |
|------------|------|------|-----------------------------|-----------------------------|----------------------------------|----------------------|-----------|
| 1746467628 | 1917 | 1917 | Sacrifice                   | Sacrifice                   | Reicher, Frank                   | Frank Reicher        | tt0008529 |
| 1745309615 | 2005 | 2005 | Ballets Russes              | Ballets Russes              | Goldfine, Dayna; Geller, Dan     | Daniel Geller        | tt0436095 |
| 1746520641 | 1950 | 1950 | Father of the Bride         | Father of the Bride         | Minnelli, Vincente               | Vincente Minnelli    | tt0042451 |
| 1746500614 | 1926 | 1926 | Silver Fingers              | Silver Fingers              | McGowan, J. P.                   | J.P. McGowan         | tt0017392 |
| 1746509211 | 1924 | 1924 | Western Grit                | Western Grit                | Cook, Ad                         | W. Adcock            | tt0177384 |
| 1746500367 | 1923 | 1923 | Itching Palms               | Itching Palms               | Horne, James W.                  | James W. Horne       | tt0014160 |
| 1746577297 | 1950 | 1950 | Shakedown                   | Shakedown                   | Pevney, Joe                      | Joseph Pevney        | tt0042953 |
| 1746523326 | 1916 | 1916 | Children of the Feud        | Children of the Feud        | Henabery, Joseph                 | Joseph Henabery      | tt0006510 |
| 1746577707 | 1937 | 1937 | Feud of the Trail           | Feud of the Trail           | Hill, Bob                        | Robert F. Hill       | tt0028865 |
| 1746185825 | 1968 | 1968 | The Hellcats                | The Hellcats                | Slatzer, Robert F.               | Robert F. Slatzer    | tt0061759 |
| 1746573806 | 1958 | 1958 | The Reluctant Debutante     | The Reluctant Debutante     | Minnelli, Vincente               | Vincente Minnelli    | tt0052126 |
| 1746486437 | 1918 | 1918 | The Grain of Dust           | The Grain of Dust           | Revier, Harry                    | Harry Revier         | tt0009126 |
| 1746433748 | 2000 | 2000 | Autumn in New York          | Autumn in New York          | Chen, Joan                       | Joan Chen            | tt0174480 |
| 1746210957 | 1973 | 1973 | The Way We Were             | The Way We Were             | Pollack, Sydney                  | Sydney Pollack       | tt0070903 |
| 1746185823 | 1967 | 1966 | The Young Warriors          | The Young Warriors          | Peysler, John                    | John Peysler         | tt0062516 |
| 1745303059 | 2005 | 2005 | Into the Blue               | Into the Blue               | Stockwell, John                  | John Stockwell       | tt0378109 |
| 1769970415 | 1966 | 1966 | Misconduct                  | Misconduct                  |                                  | Sande N. Johnsen     | tt0291352 |
| 1746410520 | 1988 | 1988 | The Dead Pool               | The Dead Pool               | Van Horn, Buddy                  | Buddy Van Horn       | tt0094963 |
| 1746502867 | 1914 | 1914 | The Conspiracy              | The Conspiracy              | Dwan, Allan                      | Allan Dwan           | tt0003792 |
| 1746570605 | 1934 | 1934 | The Pursuit of Happiness    | The Pursuit of Happiness    | Hall, Alexander                  | Alexander Hall       | tt0025690 |
| 1746492476 | 1948 | 1948 | Campus Honeymoon            | Campus Honeymoon            | Sale, Richard                    | Richard Sale         | tt0040207 |
| 1746422297 | 1997 | 1997 | L. A. Confidential          | L.A. Confidential           | Hanson, Curtis                   | Curtis Hanson        | tt0119488 |
| 1745341455 | 2009 | 2009 | I Love You, Man             | I Love You, Man             | Hamburg, John                    | John Hamburg         | tt1155056 |
| 1746512183 | 1910 | 1910 | A Veteran of the G.A.R.     | A Veteran of the G.A.R.     |                                  |                      | tt1798094 |
| 1746514638 | 1915 | 1915 | The Country Boy             | The Country Boy             | Thomson, Frederick               | Frederick A. Thomson | tt0005143 |
| 1745293529 | 2006 | 2006 | Ask the Dust                | Ask the Dust                | Towne, Robert                    | Robert Towne         | tt0384814 |
| 1746208388 | 1968 | 1968 | Hang 'Em High               | Hang 'Em High               | Post, Ted                        | Ted Post             | tt0061747 |
| 1746421250 | 1981 | 1981 | The Final Conflict          | The Final Conflict          | Baker, Graham                    | Graham Baker         | tt0082377 |
| 1769969919 | 1911 | 1911 | Silas Marner                | Silas Marner                |                                  | Theodore Marston     | tt0163232 |
| 1746394393 | 1981 | 1981 | Raiders of the Lost Ark     | Raiders of the Lost Ark     | Spielberg, Steven                | Steven Spielberg     | tt0082971 |
| 1746511768 | 1914 | 1914 | The War Extra               | The War Extra               |                                  | Harry Schenck        | tt0004777 |
| 1746503492 | 1922 | 1922 | Your Best Friend            | Your Best Friend            | Nigh, William                    | William Nigh         | tt0013804 |
| 1746498302 | 1921 | 1921 | Eden and Return             | Eden and Return             | Seiter, William A.               | William A. Seiter    | tt0012131 |
| 1746567779 | 1933 | 1933 | The Sin of Nora Moran       | The Sin of Nora Moran       | Goldstone, Phil; Christy, Howard | Phil Goldstone       | tt0024561 |
| 1746434374 | 1991 | 1990 | Men of Respect              | Men of Respect              | Reilly, William                  | William Reilly       | tt0102432 |
| 1746574219 | 1961 | 1961 | Flower Drum Song            | Flower Drum Song            | Koster, Henry                    | Henry Koster         | tt0054885 |
| 1746524306 | 1923 | 1923 | Fools and Riches            | Fools and Riches            | Blaché, Herbert                  | Herbert Blaché       | tt0014053 |
| 1746408504 | 1985 | 1984 | Maria's Lovers              | Maria's Lovers              | Konchalovsky, Andrei             | Andrey Konchalovskiy | tt0087682 |
| 1746438684 | 1996 | 1996 | Evita                       | Evita                       | Parker, Alan                     | Alan Parker          | tt0116250 |
| 1746503373 | 1918 | 1918 | Her Great Chance            | Her Great Chance            | Maigne, Charles                  | Charles Maigne       | tt0009164 |
| 1746394248 | 1991 | 1991 | Shout                       | Shout                       | Hornaday, Jeffrey                | Jeffrey Hornaday     | tt0102913 |
| 1746579022 | 1960 | 1960 | The Pusher                  | The Pusher                  | Milford, Gene                    | Gene Milford         | tt0054219 |
| 1746500529 | 1925 | 1925 | The Part Time Wife          | The Part Time Wife          | McCarty, Henry                   | Henry McCarty        | tt0016203 |
| 1769975295 | 1916 | 1916 | Caught With the Goods       | Caught with the Goods       |                                  | Eddie Lyons          | tt0326800 |
| 1746520605 | 1926 | 1926 | Battling Kid                | Battling Kid                |                                  | Paul Hurst           | tt0016631 |
| 1746473935 | 1947 | 1947 | Good News                   | Good News                   | Hurst, Paul                      | Charles Walters      | tt0039431 |
| 1746501330 | 1914 | 1914 | The Day of Days             | The Day of Days             | Walters, Charles                 | Daniel Frohman       | tt0003827 |
| 1746582161 | 1928 | 1928 | Terror Mountain             | Terror Mountain             | Frohman, Daniel                  | Louis King           | tt0019455 |
| 1746513706 | 1923 | 1922 | The Darling of the Rich     | The Darling of the Rich     | King, Louis                      | John G. Adolphi      | tt0013052 |
| 1746578905 | 1963 | 1963 | America America             | America America             | Adolfi, John G.                  | John G. Adolphi      | tt0056825 |
| 1746578707 | 1961 | 1961 | The Devil's Hand            | The Devil's Hand            | Kazan, Elia                      | Elia Kazan           | tt0055902 |
| 1746578452 | 1961 | 1961 | Look In Any Window          | Look in Any Window          | Hole, William J.                 | William J. Hole Jr.  | tt0055097 |
| 1746577908 | 1938 | 1938 | The Birth of a Baby         | Birth of a Baby             | Alland, William                  | William Alland       | tt0169615 |
| 1746577957 | 1938 | 1938 | Prison Nurse                | Prison Nurse                | Christie, A. E.                  | Al Christie          | tt0030627 |
| 1746532464 | 1923 | 1923 | Shootin' for Love           | Shootin' for Love           | Cruze, James                     | James Cruze          | tt0014464 |
| 1745340073 | 2004 | 2004 | Flight of the Phoenix       | Flight of the Phoenix       | Sedgwick, Edward                 | Edward Sedgwick      | tt0377062 |
| 1746465349 | 1945 | 1945 | Boston Blackie's Rendezvous | Boston Blackie's Rendezvous | Moore, John                      | John Moore           | tt0037554 |
|            |      |      |                             |                             | Dreifuss, Arthur                 | Arthur Dreifuss      |           |

|            |      |      |                                    |                                    |                                               |                      |           |
|------------|------|------|------------------------------------|------------------------------------|-----------------------------------------------|----------------------|-----------|
| 1746498477 | 1920 | 1920 | The Woman Untamed                  | The Woman Untamed                  | Pratt, Jack                                   | Jack Pratt           | tt0012861 |
| 1746565929 | 1956 | 1956 | Swamp Women                        | Swamp Women                        | Corman, Roger                                 | Roger Corman         | tt0048682 |
| 1746555098 | 1954 | 1954 | Hollywood Thrillmakers             | Hollywood Thrill Makers            | Ray, Bernard "B. B."                          | Bernard B. Ray       | tt0046099 |
| 1746532462 | 1922 | 1922 | Fightin' Devil                     | Fightin' Devil                     | McKenzie, Robert                              | Robert McKenzie      | tt0219684 |
| 1746492056 | 1945 | 1945 | Three in the Saddle                | Three in the Saddle                | Fraser, Harry                                 | Harry L. Fraser      | tt0038168 |
| 1746435302 | 1998 | 1997 | The Real Blonde                    | The Real Blonde                    | DiCillo, Tom                                  | Tom DiCillo          | tt0119987 |
| 1746566057 | 1957 | 1957 | Kiss Me Baby                       | Kiss Me Baby                       | Hunt, Lillian                                 | Lillian Hunt         | tt0053997 |
| 1746571271 | 1910 | 1910 | The Englishman and the Girl        | The Englishman and the Girl        | Griffith, D. W.                               | D. W. Griffith       | tt0001200 |
| 1769970836 | 1915 | 1915 | Levy's Seven Daughters             | Levy's Seven Daughters             | Van (pseud. of Wally Van Nostrand), Wally Van | Wally Van            | tt0437297 |
| 1746569499 | 1953 | 1953 | That Man from Tangier              | That Man from Tangier              | Elwyn, Robert                                 | Luis María Delgado   | tt0042202 |
| 1746578662 | 1950 | 1950 | North of the Great Divide          | North of the Great Divide          | Witney, William                               | William Witney       | tt0042795 |
| 1746515779 | 1921 | 1921 | Big Game                           | Big Game                           | Fitzgerald, Dallas M.                         | Dallas M. Fitzgerald | tt0011967 |
| 1746561010 | 1965 | 1965 | Synanon                            | Synanon                            | Quine, Richard                                | Richard Quine        | tt0059774 |
| 1746496810 | 1920 | 1920 | Mary Ellen Comes to Town           | Mary Ellen Comes to Town           | Clifton, Elmer                                | Elmer Clifton        | tt0011446 |
| 1746509217 | 1926 | 1926 | Shameful Behavior?                 | Shameful Behavior?                 | Kelley, Albert                                | Albert H. Kelley     | tt0017373 |
| 1746560141 | 1964 | 1964 | The Time Travelers                 | The Time Travelers                 | Melchior, Ib                                  | Ib Melchior          | tt0058659 |
| 1746503431 | 1918 | 1918 | A Rich Man's Darling               | A Rich Man's Darling               | Jones, Edgar                                  | Edgar Jones          | tt0009548 |
| 1746583002 | 1935 | 1935 | The Virginia Judge                 | The Virginia Judge                 | Sedgwick, Edward                              | Edward Sedgwick      | tt0027177 |
| 1746486513 | 1918 | 1918 | Her Inspiration                    | Her Inspiration                    | Thornby, Robert                               | Robert Thornby       | tt0009165 |
| 1746578741 | 1951 | 1951 | The Law and the Lady               | The Law and the Lady               | Knopf, Edwin H.                               | Edwin H. Knopf       | tt0043728 |
| 1746500630 | 1926 | 1926 | Lawless Trails                     | Lawless Trails                     | Sheldon, Forrest                              | Forrest Sheldon      | tt0127646 |
| 1746217075 | 1965 | 1965 | McHale's Navy Joins the Air Force  | McHale's Navy Joins the Air Force  | Montagne, Edward J.                           | Edward Montagne      | tt0059437 |
| 1746583020 | 1939 | 1939 | Burn 'Em Up O'Connor               | Burn 'Em Up O'Connor               | Sedgwick, Edward                              | Edward Sedgwick      | tt0031127 |
| 1746574804 | 1937 | 1937 | Underworld                         | Underworld                         | Micheaux, Oscar                               | Oscar Micheaux       | tt0135697 |
| 1746585286 | 1930 | 1930 | Men of the North                   | Men of the North                   | Roach, Hal                                    | Hal Roach            | tt0021141 |
| 1746208379 | 1969 | 1969 | Hello Down There                   | Hello Down There                   | Arnold, Jack                                  | Jack Arnold          | tt0064417 |
| 1769970638 | 1968 | 1968 | Blow the Man Down                  | Blow the Man Down                  | Dupree, Hayes                                 | Ed De Priest         | tt0211277 |
| 1746217114 | 1966 | 1965 | Runaway Girl                       | Runaway Girl                       | Petroff, Hamil                                | Hamil Petroff        | tt0171707 |
| 1746583261 | 1929 | 1929 | Plunging Hoofs                     | Plunging Hoofs                     | MacRae, Henry                                 | Henry MacRae         | tt0020277 |
| 1746583572 | 1930 | 1930 | The Woman Racket                   | The Woman Racket                   | Ober, Robert; Kelley, Albert                  | Albert H. Kelley     | tt0021559 |
| 1745359335 | 2008 | 2008 | Swing Vote                         | Swing Vote                         | Stern, Joshua Michael                         | Joshua Michael Stern | tt1027862 |
| 1746582908 | 1935 | 1935 | Queen of the Jungle                | Queen of the Jungle                | Hill, Robert                                  | Robert F. Hill       | tt0026903 |
| 1746520444 | 1950 | 1950 | Hoedown                            | Hoedown                            | Nazarro, Ray                                  | Ray Nazarro          | tt0042565 |
| 1746581756 | 1930 | 1930 | Soup to Nuts                       | Soup to Nuts                       | Stoloff, Benjamin                             | Benjamin Stoloff     | tt0021408 |
| 1746580466 | 1937 | 1937 | Double or Nothing                  | Double or Nothing                  | Reed, Theodore                                | Theodore Reed        | tt0028806 |
| 1746508702 | 1924 | 1924 | Thy Name Is Woman                  | Thy Name Is Woman                  | Niblo, Fred                                   | Fred Niblo           | tt0015413 |
| 1746520803 | 1949 | 1949 | Father Was a Fullback              | Father Was a Fullback              | Stahl, John M.; Nugent, Elliott               | John M. Stahl        | tt0041350 |
| 1746569731 | 1958 | 1958 | Enchanted Island                   | Enchanted Island                   | Dwan, Allan                                   | Allan Dwan           | tt0051581 |
| 1769970028 | 1911 | 1911 | The Dumb Messenger                 | The Dumb Messenger                 |                                               |                      | tt1204040 |
| 1746570445 | 1934 | 1934 | Affairs of a Gentleman             | Affairs of a Gentleman             | Marin, Edwin L.                               | Edwin L. Marin       | tt0024817 |
| 1746582771 | 1938 | 1938 | Six-Gun Trail                      | Six Gun Trail                      | Newfield, Sam                                 | Sam Newfield         | tt0030756 |
| 1746532843 | 1916 | 1916 | Man and His Soul                   | Man and His Soul                   | Noble, John W.                                | John W. Noble        | tt0007022 |
| 1746500628 | 1924 | 1924 | Girl Shy                           | Girl Shy                           | Newmeyer, Fred; Taylor, Sam                   | Fred C. Newmeyer     | tt0014945 |
| 1746524197 | 1915 | 1915 | The Dancing Girl                   | The Dancing Girl                   |                                               | Allan Dwan           | tt0005170 |
| 1746508059 | 1926 | 1926 | Too Much Money                     | Too Much Money                     | Dillon, John Francis                          | John Francis Dillon  | tt0017478 |
| 1746197967 | 1965 | 1965 | Never Too Late                     | Never Too Late                     | Yorkin, Bud                                   | Bud Yorkin           | tt0059502 |
| 1746420515 | 1993 | 1993 | Heaven & Earth                     | Heaven & Earth                     | Stone, Oliver                                 | Oliver Stone         | tt0107096 |
| 1746569782 | 1954 | 1954 | The Great Diamond Robbery          | The Great Diamond Robbery          | Leonard, Robert Z.                            | Robert Z. Leonard    | tt0045837 |
| 1746565953 | 1953 | 1953 | Conquest of Cochise                | Conquest of Cochise                | Castle, William                               | William Castle       | tt0045645 |
| 1746235438 | 1979 | 1979 | Good Luck, Miss Wyckoff            | Good Luck, Miss Wyckoff            | Chomsky, Marvin J.                            | Marvin J. Chomsky    | tt0079228 |
| 1746453813 | 1941 | 1941 | Paper Bullets                      | Paper Bullets                      | Rosen, Phil                                   | Phil Rosen           | tt0033998 |
| 1746524309 | 1915 | 1915 | The Child, the Dog and the Villain | The Child, the Dog and the Villain | Mix, Tom                                      | Tom Mix              | tt0005083 |
| 1746504339 | 1920 | 1921 | The Barbarian                      | The Barbarian                      | Crisp, Donald                                 | Donald Crisp         | tt0011944 |
| 1746418846 | 1940 | 1940 | Girl in 313                        | Girl in 313                        | Cortez, Richard                               | Ricardo Cortez       | tt0032528 |
| 1746569708 | 1958 | 1958 | The Bonnie Parker Story            | The Bonnie Parker Story            | Witney, William                               | William Witney       | tt0051430 |
| 1746488016 | 1918 | 1918 | A Diplomatic Mission               | A Diplomatic Mission               | Conway, Jack                                  | Jack Conway          | tt0009012 |
| 1746584645 | 1929 | 1929 | The Drifter                        | The Drifter                        | De Lacy, Robert                               | Robert De Lacey      | tt0019837 |

|            |      |      |                                              |                                           |                                   |                    |           |
|------------|------|------|----------------------------------------------|-------------------------------------------|-----------------------------------|--------------------|-----------|
| 1745340042 | 2003 | 2003 | Master and Commander: The Far Side of the Wo | Master and Commander: The Far Side of the | Weir, Peter                       | Peter Weir         | tt0311113 |
| 1746272910 | 1980 | 1980 | The Formula                                  | The Formula                               | Avildsen, John G.                 | John G. Avildsen   | tt0080754 |
| 1746582839 | 1939 | 1939 | The Real Glory                               | The Real Glory                            | Hathaway, Henry                   | Henry Hathaway     | tt0031842 |
| 1746573725 | 1960 | 1960 | Home from the Hill                           | Home from the Hill                        | Minnelli, Vincente                | Vincente Minnelli  | tt0053917 |
| 1746256225 | 1978 | 1978 | Good Guys Wear Black                         | Good Guys Wear Black                      | Post, Ted                         | Ted Post           | tt0079227 |
| 1746210830 | 1973 | 1973 | The Brothers O'Toole                         | The Brothers O'Toole                      | Erdman, Richard                   | Richard Erdman     | tt0069825 |
| 1746514936 | 1927 | 1927 | Annie Laurie                                 | Annie Laurie                              | Robertson, John S.                | John S. Robertson  | tt0017632 |
| 1746524489 | 1915 | 1915 | The Melting Pot                              | The Melting Pot                           | Vincent, James; Bailey, Oliver D. | Oliver D. Bailey   | tt0005736 |
| 1746583336 | 1951 | 1951 | The Highwayman                               | The Highwayman                            | Selander, Lesley                  | Lesley Selander    | tt0043638 |
| 1746500519 | 1926 | 1926 | Spangles                                     | Spangles                                  | O'Connor, Frank                   | Frank O'Connor     | tt0017421 |
| 1746272880 | 1978 | 1978 | Straight Time                                | Straight Time                             | Grosbard, Ulu                     | Ulu Grosbard       | tt0078326 |
| 1746464924 | 1942 | 1942 | Billy the Kid's Smoking Guns                 | Billy the Kid's Smoking Guns              | Scott, Sherman                    | Sam Newfield       | tt0034516 |
| 1746574543 | 1935 | 1935 | Lawless Border                               | Lawless Border                            | McCarthy, J. P.                   | John P. McCarthy   | tt0026613 |
| 1746515082 | 1921 | 1921 | The Kid                                      | The Kid                                   | Chaplin, Charles                  | Charles Chaplin    | tt0012349 |
| 1746453618 | 1942 | 1942 | Spy Ship                                     | Spy Ship                                  | Eason, B. Reeves                  | B. Reeves Eason    | tt0035371 |
| 1745342519 | 2002 | 2002 | Harry Potter and the Chamber of Secrets      | Harry Potter and the Chamber of Secrets   | Columbus, Chris                   | Chris Columbus     | tt0295297 |
| 1746513221 | 1916 | 1916 | Little Eve Edgarton                          | Little Eve Edgarton                       | Leonard, Robert                   | Robert Z. Leonard  | tt0006928 |
| 1746435127 | 1942 | 1942 | Lady Gangster                                | Lady Gangster                             | Roberts, Florian                  | Robert Florey      | tt0034959 |
| 1746475515 | 1948 | 1948 | The Gallant Blade                            | The Gallant Blade                         | Levin, Henry                      | Henry Levin        | tt0040382 |
| 1746467124 | 1917 | 1917 | Behind the Mask                              | Behind the Mask                           | Blaché, Alice                     | Alice Guy          | tt0007692 |
| 1746218731 | 1971 | 1971 | A Safe Place                                 | A Safe Place                              | Jaglom, Henry                     | Henry Jaglom       | tt0067699 |
| 1746523940 | 1916 | 1916 | The Weakness of Man                          | The Weakness of Man                       | O'Neil, Barry                     | Barry O'Neil       | tt0007545 |
| 1746567438 | 1933 | 1933 | Pleasure Cruise                              | Pleasure Cruise                           | Tuttle, Frank                     | Frank Tuttle       | tt0024455 |
| 1746513096 | 1923 | 1923 | Zaza                                         | Zaza                                      | Dwan, Allan                       | Allan Dwan         | tt0014636 |
| 1746578773 | 1958 | 1958 | Wild Heritage                                | Wild Heritage                             | Haas, Charles                     | Charles F. Haas    | tt0052393 |
| 1746502219 | 1915 | 1915 | Old Heidelberg                               | Old Heidelberg                            | Emerson, John                     | John Emerson       | tt0005823 |
| 1746563818 | 1953 | 1953 | Battle Circus                                | Battle Circus                             | Brooks, Richard                   | Richard Brooks     | tt0045544 |
| 1746582308 | 1930 | 1930 | The Divorcée                                 | The Divorcee                              | Leonard, Robert Z.                | Robert Z. Leonard  | tt0020827 |
| 1746420360 | 1987 | 1987 | Making Mr. Right                             | Making Mr. Right                          | Seidelman, Susan                  | Susan Seidelman    | tt0093477 |
| 1746577804 | 1933 | 1933 | Female                                       | Female                                    | Curtiz, Michael                   | Michael Curtiz     | tt0024008 |
| 1746577179 | 1962 | 1962 | Requiem for a Heavyweight                    | Requiem for a Heavyweight                 | Nelson, Ralph                     | Ralph Nelson       | tt0056406 |
| 1769969487 | 1965 | 1965 | One Shocking Moment                          | One Shocking Moment                       | Mikels, Ted V.                    | Ted V. Mikels      | tt0059541 |
| 1746577132 | 1962 | 1962 | Samar                                        | Samar                                     | Montgomery, George                | George Montgomery  | tt0056440 |
| 1746507855 | 1925 | 1925 | The Parasite                                 | The Parasite                              | Gasnier, Louis                    | Louis J. Gasnier   | tt0016200 |
| 1746512094 | 1910 | 1910 | A Redman's Devotion                          | A Redman's Devotion                       |                                   | Fred J. Balshofer  | tt1364283 |
| 1746491965 | 1944 | 1944 | Ladies Courageous                            | Ladies Courageous                         | Rawlins, John                     | John Rawlins       | tt0036529 |
| 1746512071 | 1927 | 1927 | His Rise to Fame                             | His Rise to Fame                          | McEveety, Bernard                 | Bernard McEveety   | tt0018001 |
| 1745359788 | 2004 | 2004 | A Cinderella Story                           | A Cinderella Story                        | Rosman, Mark                      | Mark Rosman        | tt0356470 |
| 1746487598 | 1920 | 1920 | Lahoma                                       | Lahoma                                    | Lewis, Edgar                      | Edgar Lewis        | tt0195863 |
| 1746566115 | 1953 | 1953 | Sombrero                                     | Sombrero                                  | Foster, Norman                    | Norman Foster      | tt0046344 |
| 1746465311 | 1942 | 1942 | Valley of the Sun                            | Valley of the Sun                         | Marshall, George                  | George Marshall    | tt0035502 |
| 1746486825 | 1917 | 1917 | The Winged Mystery                           | The Winged Mystery                        | De Grasse, Joseph                 | Joseph De Grasse   | tt0008777 |
| 1746524065 | 1916 | 1916 | Flirting with Fate                           | Flirting with Fate                        | Cabanne, Christy                  | Christy Cabanne    | tt0006688 |
| 1746583235 | 1928 | 1928 | Absent                                       | Absent                                    | Gant, Harry A.                    | Harry A. Gant      | tt0018614 |
| 1746486139 | 1921 | 1921 | Out of the Clouds                            | Out of the Clouds                         | Franchon, Leonard                 | Leonard Franchon   | tt0338317 |
| 1746582334 | 1930 | 1930 | The Thoroughbred                             | The Thoroughbred                          | Thorpe, Richard                   | Richard Thorpe     | tt0021469 |
| 1746497239 | 1919 | 1919 | Married in Haste                             | Married in Haste                          | Rosson, Arthur                    | Arthur Rosson      | tt0010442 |
| 1746421667 | 2000 | 2000 | God's Army                                   | God's Army                                | Dutcher, Richard                  | Richard Dutcher    | tt0238247 |
| 1746582270 | 1951 | 1951 | Passage West                                 | Passage West                              | Foster, Lewis R.                  | Lewis R. Foster    | tt0043906 |
| 1746570987 | 1935 | 1935 | The Payoff                                   | The Payoff                                | Florey, Robert                    | Robert Florey      | tt0026856 |
| 1746562219 | 1955 | 1954 | Hunters of the Deep                          | Hunters of the Deep                       |                                   | Ben Chapman        | tt0048184 |
| 1746465206 | 1946 | 1946 | Dangerous Money                              | Dangerous Money                           | Morse, Terry                      | Terry O. Morse     | tt0038449 |
| 1746435385 | 1999 | 1999 | Message in a Bottle                          | Message in a Bottle                       | Mandoki, Luis                     | Luis Mandoki       | tt0139462 |
| 1746464955 | 1947 | 1947 | The Trespasser                               | The Trespasser                            | Blair, George                     | George Blair       | tt0039914 |
| 1746456041 | 1997 | 1997 | Money Talks                                  | Money Talks                               | Ratner, Brett                     | Brett Ratner       | tt0119695 |
| 1746513222 | 1923 | 1923 | The Cheat                                    | The Cheat                                 | Fitzmaurice, George               | George Fitzmaurice | tt0013920 |
| 1746582802 | 1939 | 1939 | Street of Missing Men                        | Street of Missing Men                     | Salkow, Sidney                    | Sidney Salkow      | tt0031986 |

|            |      |      |                                     |                                     |                      |                     |           |
|------------|------|------|-------------------------------------|-------------------------------------|----------------------|---------------------|-----------|
| 1746211253 | 1973 | 1973 | 40 Carats                           | 40 Carats                           | Katselas, Milton     | Milton Katselas     | tt0070068 |
| 1746500172 | 1924 | 1924 | Circus Lure                         | Circus Lure                         | Mattison, Frank S.   | Frank S. Mattison   | tt0321707 |
| 1746524535 | 1923 | 1923 | Wasted Lives                        | Wasted Lives                        | Geldert, Clarence    | Clarence Geldart    | tt0177356 |
| 1746198225 | 1968 | 1968 | The Secret Life of an American Wife | The Secret Life of an American Wife | Axelrod, George      | George Axelrod      | tt0063572 |
| 1745358079 | 2002 | 2002 | Standing in the Shadows of Motown   | Standing in the Shadows of Motown   | Justman, Paul        | Paul Justman        | tt0314725 |
| 1746424244 | 1942 | 1942 | Vengeance of the West               | Vengeance of the West               | Hillyer, Lambert     | Lambert Hillyer     | tt0035507 |
| 1746565959 | 1954 | 1954 | Jesse James' Women                  | Jesse James' Women                  | Barry, Donald        | Don 'Red' Barry     | tt0047130 |
| 1746583398 | 1931 | 1931 | The Road to Singapore               | The Road to Singapore               | Green, Alfred E.     | Alfred E. Green     | tt0022321 |
| 1746474824 | 1943 | 1943 | The Black Hills Express             | Black Hills Express                 | English, John        | John English        | tt0035677 |
| 1746520096 | 1924 | 1924 | Love of Women                       | Love of Women                       | Bennett, Whitman     | Whitman Bennett     | tt0015088 |
| 1746454300 | 1943 | 1943 | Silent Witness                      | Silent Witness                      | Yarbrough, Jean      | Jean Yarbrough      | tt0286109 |
| 1746473710 | 1945 | 1945 | Why Girls Leave Home                | Why Girls Leave Home                | Berke, William       | William Berke       | tt0038249 |
| 1746503998 | 1919 | 1919 | Tangled Threads                     | Tangled Threads                     | Hickman, Howard C.   | Howard C. Hickman   | tt0010756 |
| 1746569918 | 1958 | 1958 | From the Earth to the Moon          | From the Earth to the Moon          | Haskin, Byron        | Byron Haskin        | tt0051638 |
| 1746509555 | 1950 | 1950 | Frisco Tornado                      | Frisco Tornado                      | Springsteen, R. G.   | R.G. Springsteen    | tt0042483 |
| 1746584356 | 1937 | 1937 | It's Love I'm After                 | It's Love I'm After                 | Mayo, Archie L.      | Archie Mayo         | tt0029058 |
| 1746577398 | 1959 | 1959 | Pillow Talk                         | Pillow Talk                         | Gordon, Michael      | Michael Gordon      | tt0053172 |
| 1745357950 | 2003 | 2003 | Zero Day                            | Zero Day                            | Coccio, Ben          | Ben Coccio          | tt0365960 |
| 1746410814 | 1987 | 1987 | Teen Wolf Too                       | Teen Wolf Too                       | Leitch, Christopher  | Christopher Leitch  | tt0094118 |
| 1746584887 | 1940 | 1940 | Untamed                             | Untamed                             | Archainbaud, George  | George Archainbaud  | tt0033208 |
| 1746580925 | 1960 | 1960 | The Fugitive Kind                   | The Fugitive Kind                   | Lumet, Sidney        | Sidney Lumet        | tt0052832 |
| 1746580819 | 1935 | 1935 | The Perfect Gentleman               | The Perfect Gentleman               | Whelan, Tim          | Tim Whelan          | tt0026864 |
| 1746582406 | 1939 | 1939 | Judge Hardy and Son                 | Judge Hardy and Son                 | Seitz, George B.     | George B. Seitz     | tt0031517 |
| 1746560681 | 1932 | 1932 | Blondie of the Follies              | Blondie of the Follies              | Goulding, Edmund     | Edmund Goulding     | tt0022700 |
| 1746409974 | 1986 | 1986 | The Men's Club                      | The Men's Club                      | Medak, Peter         | Peter Medak         | tt0091508 |
| 1746502640 | 1916 | 1916 | The Brand of Cowardice              | The Brand of Cowardice              | Noble, John W.       | John W. Noble       | tt0006463 |
| 1746496543 | 1920 | 1919 | Too Much Johnson                    | Too Much Johnson                    | Crisp, Donald        | Donald Crisp        | tt0011781 |
| 1746502803 | 1910 | 1910 | Mr. Four Flush                      | Mr. Four Flush                      |                      |                     | tt0354752 |
| 1746501464 | 1917 | 1917 | The Double Standard                 | The Double Standard                 | Smalley, Phillips    | Phillips Smalley    | tt0007872 |
| 1746574962 | 1935 | 1935 | The Devil Is a Woman                | The Devil Is a Woman                | Sternberg, Josef von | Josef von Sternberg | tt0026276 |
| 1746424213 | 1940 | 1940 | Emergency Squad                     | Emergency Squad                     | Dmytryk, Edward      | Edward Dmytryk      | tt0032440 |
| 1746563350 | 1951 | 1951 | The Harlem Globetrotters            | The Harlem Globetrotters            | Brown, Phil          | Phil Brown          | tt0043621 |
| 1746183485 | 1910 | 1910 | The Banker's Daughters              | The Banker's Daughters              | Griffith, D. W.      | D.W. Griffith       | tt0001129 |
| 1746437008 | 1941 | 1941 | The Big Store                       | The Big Store                       | Riesner, Charles     | Charles Reisner     | tt0033388 |
| 1746500262 | 1924 | 1924 | The Beloved Brute                   | The Beloved Brute                   | Blackton, J. Stuart  | J. Stuart Blackton  | tt0014711 |
| 1746580509 | 1937 | 1937 | Second Honeymoon                    | Second Honeymoon                    | Lang, Walter         | Walter Lang         | tt0029529 |
| 1746523552 | 1916 | 1916 | The Jungle Child                    | The Jungle Child                    | Edwards, Walter      | Walter Edwards      | tt0163024 |
| 1745395570 | 2010 | 2010 | Jackass 3D                          | Jackass 3D                          | Tremaine, Jeff       | Jeff Tremaine       | tt1116184 |
| 1746511749 | 1916 | 1916 | The Heiress at Coffee Dan's         | The Heiress at Coffee Dan's         | Dillon, Edward       | Edward Dillon       | tt0006778 |
| 1746582603 | 1938 | 1938 | Maid's Night Out                    | Maid's Night Out                    | Holmes, Ben          | Ben Holmes          | tt0030400 |
| 1746486862 | 1919 | 1919 | The Heart of Wetona                 | The Heart of Wetona                 | Franklin, Sidney A.  | Sidney Franklin     | tt0010229 |
| 1745302278 | 2007 | 2007 | Dan in Real Life                    | Dan in Real Life                    | Hedges, Peter        | Peter Hedges        | tt0480242 |
| 1746525089 | 1920 | 1920 | The World and His Wife              | The World and His Wife              | Vignola, Robert G.   | Robert G. Vignola   | tt0011882 |
| 1746514361 | 1915 | 1915 | The Battle of Ballots               | The Battle of Ballots               | Coigne, Frank B.     | Frank B. Coigne     | tt0004945 |
| 1746520449 | 1924 | 1924 | The Eagle's Claw                    | The Eagle's Claw                    | Seeling, Charles R.  | Charles R. Seeling  | tt0014860 |
| 1746410659 | 1984 | 1984 | Breakin' 2: Electric Boogaloo       | Breakin' 2: Electric Boogaloo       | Firstenberg, Sam     | Sam Firstenberg     | tt0086999 |
| 1746474522 | 1947 | 1947 | Mourning Becomes Electra            | Mourning Becomes Electra            | Nichols, Dudley      | Dudley Nichols      | tt0039636 |
| 1746584198 | 1940 | 1940 | Girl from Havana                    | Girl from Havana                    | Landers, Lew         | Lew Landers         | tt0032527 |
| 1746467860 | 1917 | 1917 | Pride and the Devil                 | Pride and the Devil                 | Ridgely, Richard     | Richard Ridgely     | tt0182375 |
| 1746569919 | 1956 | 1956 | The Girl He Left Behind             | The Girl He Left Behind             | Butler, David        | David Butler        | tt0049264 |
| 1746198277 | 1967 | 1966 | Red Roses of Passion                | Red Roses of Passion                | Sarno, Joe           | Joseph W. Sarno     | tt0060888 |
| 1769970800 | 1912 | 1912 | The First Violin                    | The First Violin                    | Brooke, Van Dyke     | Van Dyke Brooke     | tt0002183 |
| 1746465178 | 1945 | 1945 | Our Vines Have Tender Grapes        | Our Vines Have Tender Grapes        | Rowland, Roy         | Roy Rowland         | tt0037963 |
| 1746574698 | 1937 | 1937 | Boots and Saddles                   | Boots and Saddles                   | Kane, Joe            | Joseph Kane         | tt0028646 |
| 1746525023 | 1920 | 1920 | The Woman Gives                     | The Woman Gives                     | Neill, Roy W.        | Roy William Neill   | tt0011872 |
| 1746569853 | 1955 | 1955 | Love Me or Leave Me                 | Love Me or Leave Me                 | Vidor, Charles       | Charles Vidor       | tt0048317 |
| 1746409467 | 1982 | 1982 | Personal Best                       | Personal Best                       | Towne, Robert        | Robert Towne        | tt0084489 |



|            |      |      |                                    |                                    |                                   |                      |           |
|------------|------|------|------------------------------------|------------------------------------|-----------------------------------|----------------------|-----------|
| 1746573825 | 1959 | 1959 | A Bucket of Blood                  | A Bucket of Blood                  | Corman, Roger                     | Roger Corman         | tt0052655 |
| 1769974248 | 1916 | 1916 | Busted Hearts                      | Busted Hearts                      |                                   | Bobby Burns          | tt0269038 |
| 1745340789 | 2003 | 2003 | The Battle of Shaker Heights       | The Battle of Shaker Heights       | Rankin, Kyle ; Potelle, Efram     | Efram Potelle        | tt0357470 |
| 1746580818 | 1937 | 1937 | I Cover the War                    | I Cover the War!                   | Lubin, Arthur                     | Arthur Lubin         | tt0029034 |
| 1746586169 | 1940 | 1940 | Blondie Has Servant Trouble        | Blondie Has Servant Trouble        | Strayer, Frank R.                 | Frank R. Strayer     | tt0032261 |
| 1746563849 | 1952 | 1952 | Finders Keepers                    | Finders Keepers                    | De Cordova, Frederick             | Frederick De Cordova | tt0043534 |
| 1746515667 | 1922 | 1922 | Rags to Riches                     | Rags to Riches                     | Worsley, Wallace                  | Wallace Worsley      | tt0013529 |
| 1746554520 | 1963 | 1963 | The Three Lives of Thomasina       | The Three Lives of Thomasina       | Chaffey, Don                      | Don Chaffey          | tt0057579 |
| 1746576727 | 1932 | 1932 | Alias the Doctor                   | Alias the Doctor                   | Curtiz, Michael                   | Michael Curtiz       | tt0022619 |
| 1746508099 | 1924 | 1924 | Life's Greatest Game               | Life's Greatest Game               | Johnson, Emory                    | Emory Johnson        | tt0127654 |
| 1769970156 | 1912 | 1912 | Darkfeather's Strategy             | Darkfeather's Strategy             |                                   | Frank Montgomery     | tt0199451 |
| 1745372515 | 2004 | 2004 | The Bourne Supremacy               | The Bourne Supremacy               | Greengrass, Paul                  | Paul Greengrass      | tt0372183 |
| 1746580395 | 1937 | 1937 | Stand-In                           | Stand In                           | Garnett, Tay                      | Tay Garnett          | tt0029605 |
| 1746512745 | 1927 | 1927 | A Harp in Hock                     | A Harp in Hock                     | Hoffman, Renaud                   | Renaud Hoffman       | tt0017965 |
| 1746578881 | 1962 | 1962 | Satan in High Heels                | Satan in High Heels                | Intrator, Jerald                  | Jerald Intrator      | tt0138075 |
| 1746583123 | 1939 | 1939 | The Rains Came                     | The Rains Came                     | Brown, Clarence                   | Clarence Brown       | tt0031835 |
| 1746410211 | 1984 | 1984 | Savage Streets                     | Savage Streets                     | Steinmann, Danny                  | Danny Steinmann      | tt0088044 |
| 1746582707 | 1936 | 1936 | Show Boat                          | Show Boat                          | Whale, James                      | James Whale          | tt0028249 |
| 1746210916 | 1970 | 1970 | Catch-22                           | Catch 22                           | Nichols, Mike                     | Mike Nichols         | tt0065528 |
| 1746512180 | 1910 | 1910 | Lost for Many Years                | Lost for Many Years                |                                   | Fred J. Balshofer    | tt0359617 |
| 1746520343 | 1924 | 1924 | Hold Your Breath                   | Hold Your Breath                   | Sidney, Scott                     | Scott Sidney         | tt0014996 |
| 1746572386 | 1931 | 1931 | Private Lives                      | Private Lives                      | Franklin, Sidney                  | Sidney Franklin      | tt0022279 |
| 1746524553 | 1927 | 1927 | Captain Salvation                  | Captain Salvation                  | Robertson, John S.                | John S. Robertson    | tt0017735 |
| 1769970714 | 1915 | 1915 | The Reaping                        | The Reaping                        | King, Burton L.                   | E.H. Calvert         | tt0005956 |
| 1746524946 | 1915 | 1915 | The Little Gypsy                   | The Little Gypsy                   | Apfel, Oscar C.                   | Oscar Apfel          | tt0005630 |
| 1745340176 | 2001 | 2001 | A Galaxy Far Far Away              | A Galaxy Far, Far Away             | Jalil, Tariq                      | Tariq Jalil          | tt0230234 |
| 1745358573 | 2004 | 2004 | I, Robot                           | I, Robot                           | Proyas, Alex                      | Alex Proyas          | tt0343818 |
| 1745341209 | 2003 | 2003 | Daredevil                          | Daredevil                          | Johnson, Mark Steven              | Mark Steven Johnson  | tt0287978 |
| 1746509027 | 1926 | 1926 | Chip of the Flying U               | Chip of the Flying U               | Reynolds, Lynn                    | Lynn Reynolds        | tt0016724 |
| 1746502859 | 1915 | 1915 | An American Gentleman              | An American Gentleman              | Gorman, John                      | John Gorman          | tt0004891 |
| 1746465064 | 1945 | 1946 | The Fighting Guardsman             | The Fighting Guardsman             | Levin, Henry                      | Henry Levin          | tt0037698 |
| 1746198271 | 1968 | 1968 | The Heart Is a Lonely Hunter       | The Heart Is a Lonely Hunter       | Miller, Robert Ellis              | Robert Ellis Miller  | tt0063050 |
| 1746570331 | 1933 | 1933 | His Private Secretary              | His Private Secretary              | Whitman, Philip H.                | Phil Whitman         | tt0024124 |
| 1746508400 | 1926 | 1925 | Perils of the Rail                 | Perils of the Rail                 | McGowan, J. P.                    | J.P. McGowan         | tt0016213 |
| 1746485923 | 1920 | 1920 | The Adorable Savage                | The Adorable Savage                | Dawn, Norman                      | Norman Dawn          | tt0010948 |
| 1746508972 | 1950 | 1949 | The Woman on Pier 13               | The Woman on Pier 13               | Stevenson, Robert                 | Robert Stevenson     | tt0041495 |
| 1746580341 | 1937 | 1937 | The Good Earth                     | The Good Earth                     | Franklin, Sidney; Fleming, Victor | Sidney Franklin      | tt0028944 |
| 1746198542 | 1968 | 1968 | Murder a la Mod                    | Murder à la Mod                    | De Palma, Brian                   | Brian De Palma       | tt0163114 |
| 1746453546 | 1941 | 1941 | Father Steps Out                   | Father Steps Out                   | Yarbrough, Jean                   | Jean Yarbrough       | tt0033468 |
| 1746503428 | 1919 | 1919 | The Trap                           | The Trap                           | Reicher, Frank                    | Frank Reicher        | tt0010798 |
| 1745374320 | 2001 | 2001 | Don't Say a Word                   | Don't Say a Word                   | Fleder, Gary                      | Gary Fleder          | tt0260866 |
| 1746409353 | 1981 | 1981 | Raggedy Man                        | Raggedy Man                        | Fisk, Jack                        | Jack Fisk            | tt0082969 |
| 1746583282 | 1928 | 1928 | Captain Swagger                    | Captain Swagger                    | Griffith, Edward H.               | Edward H. Griffith   | tt0018748 |
| 1746258897 | 1980 | 1980 | The Final Countdown                | The Final Countdown                | Taylor, Don                       | Don Taylor           | tt0080736 |
| 1746465084 | 1942 | 1942 | Busses Roar                        | Busses Roar                        | Lederman, D. Ross                 | D. Ross Lederman     | tt0034558 |
| 1746555120 | 1954 | 1954 | Captain Kidd and the Slave Girl    | Captain Kidd and the Slave Girl    | Landers, Lew                      | Lew Landers          | tt0046826 |
| 1746583217 | 1951 | 1951 | Too Young to Kiss                  | Too Young to Kiss                  | Leonard, Robert Z.                | Robert Z. Leonard    | tt0044138 |
| 1746465196 | 1944 | 1944 | The Contender                      | The Contender                      | Newfield, Sam                     | Sam Newfield         | tt0036720 |
| 1746454609 | 1942 | 1942 | For Me and My Gal                  | For Me and My Gal                  | Berkeley, Busby                   | Busby Berkeley       | tt0034746 |
| 1746503007 | 1915 | 1915 | Children of the Ghetto             | Children of the Ghetto             | Powell, Frank                     | Frank Powell         | tt0005085 |
| 1746440150 | 2000 | 2000 | Battlefield Earth                  | Battlefield Earth                  | Christian, Roger                  | Roger Christian      | tt0185183 |
| 1746501352 | 1917 | 1917 | The Silent Lady                    | The Silent Lady                    | Wilson, Elsie Jane                | Elsie Jane Wilson    | tt0008569 |
| 1746420236 | 1990 | 1990 | Tales from the Darkside: The Movie | Tales from the Darkside: The Movie | Harrison, John                    | John Harrison        | tt0100740 |
| 1746583126 | 1936 | 1936 | More Than a Secretary              | More Than a Secretary              | Green, Alfred E.                  | Alfred E. Green      | tt0027985 |
| 1746509002 | 1925 | 1925 | The Bad Lands                      | The Bad Lands                      | Henderson, Dell                   | Dell Henderson       | tt0015594 |
| 1746394515 | 1988 | 1988 | Vice Versa                         | Vice Versa                         | Gilbert, Brian                    | Brian Gilbert        | tt0096380 |
| 1746453777 | 1941 | 1941 | Gentleman from Dixie               | Gentleman from Dixie               | Herman, Al                        | Albert Herman        | tt0033655 |

|                   |             |             |                                          |                                           |                                      |                     |                  |
|-------------------|-------------|-------------|------------------------------------------|-------------------------------------------|--------------------------------------|---------------------|------------------|
| 1746435335        | 1999        | 1999        | Music of the Heart                       | Music of the Heart                        | Craven, Wes                          | Wes Craven          | tt0166943        |
| 1746438222        | 1941        | 1941        | Parachute Battalion                      | Parachute Battalion                       | Goodwins, Leslie                     | Leslie Goodwins     | tt0034000        |
| 1746508221        | 1925        | 1925        | The Adventurous Sex                      | The Adventurous Sex                       | Giblyn, Charles                      | Charles Giblyn      | tt0015543        |
| 1746560859        | 1932        | 1932        | The Painted Woman                        | The Painted Woman                         | Blystone, John                       | John G. Blystone    | tt0023314        |
| <b>1745282917</b> | <b>2007</b> | <b>2007</b> | <b>Hostel Part II</b>                    | <b>Hostel: Part II</b>                    | <b>Roth, Eli</b>                     | <b>Eli Roth</b>     | <b>tt0498353</b> |
| 1746436572        | 1940        | 1940        | Two Girls on Broadway                    | Two Girls on Broadway                     | Simon, S. Sylvan                     | S. Sylvan Simon     | tt0033191        |
| 1746566185        | 1953        | 1952        | The Pathfinder                           | The Pathfinder                            | Salkow, Sidney                       | Sidney Salkow       | tt0045013        |
| 1746419968        | 1993        | 1993        | Twenty Bucks                             | Twenty Bucks                              | Rosenfeld, Keva                      | Keva Rosenfeld      | tt0108410        |
| 1746520588        | 1925        | 1925        | Siege                                    | Siege                                     | Gade, Svend                          | Svend Gade          | tt0016348        |
| 1746584223        | 1940        | 1940        | If I Had My Way                          | If I Had My Way                           | Butler, David                        | David Butler        | tt0032624        |
| 1746198022        | 1967        | 1967        | The Perils of Pauline                    | The Perils of Pauline                     | Leonard, Herbert B.; Shelley, Joshua | Herbert B. Leonard  | tt0062117        |
| 1746421307        | 1994        | 1994        | The River Wild                           | The River Wild                            | Hanson, Curtis                       | Curtis Hanson       | tt0110997        |
| 1746566190        | 1955        | 1955        | Jupiter's Darling                        | Jupiter's Darling                         | Sidney, George                       | George Sidney       | tt0048239        |
| 1746572848        | 1931        | 1931        | The Cisco Kid                            | The Cisco Kid                             | Cummings, Irving                     | Irving Cummings     | tt0021748        |
| 1746410126        | 1987        | 1987        | Spaceballs                               | Spaceballs                                | Brooks, Mel                          | Mel Brooks          | tt0094012        |
| 1746554949        | 1965        | 1965        | Daytona Beach Weekend                    | Daytona Beach Weekend                     | Welby, Robert                        | Bob Welborn         | tt0188550        |
| 1746410145        | 1988        | 1988        | Police Academy 5: Assignment Miami Beach | Police Academy 5: Assignment: Miami Beach | Myerson, Alan                        | Alan Myerson        | tt0095882        |
| 1745359826        | 2001        | 2001        | Lara Croft: Tomb Raider                  | Lara Croft: Tomb Raider                   | West, Simon                          | Simon West          | tt0146316        |
| 1746408874        | 1990        | 1990        | Instant Karma                            | Instant Karma                             | Taylor, Roderick                     | Roderick Taylor     | tt0099849        |
| 1746520801        | 1925        | 1925        | The Bloodhound                           | The Bloodhound                            | Craft, William James                 | William James Craft | tt0015630        |
| 1746235638        | 1979        | 1979        | Last Embrace                             | Last Embrace                              | Demme, Jonathan                      | Jonathan Demme      | tt0079437        |
| 1746574890        | 1934        | 1934        | Lightning Bill                           | Lighting Bill                             | Adamson, Victor                      | Victor Adamson      | tt0129202        |
| 1746567936        | 1952        | 1952        | Hold That Line                           | Hold That Line                            | Beaudine, William                    | William Beaudine    | tt0044714        |
| 1746573736        | 1956        | 1956        | Autumn Leaves                            | Autumn Leaves                             | Aldrich, Robert                      | Robert Aldrich      | tt0048967        |
| 1746570122        | 1934        | 1934        | The House of Rothschild                  | The House of Rothschild                   | Werker, Alfred                       | Alfred L. Werker    | tt0025272        |
| 1746584112        | 1936        | 1936        | The Girl on the Front Page               | The Girl on the Front Page                | Beaumont, Harry                      | Harry Beaumont      | tt0027676        |
| 1746512740        | 1915        | 1915        | Mixed Up                                 | Mixed Up                                  |                                      |                     | tt0005758        |
| 1746210032        | 1971        | 1971        | Cometogether                             | Come Together                             | Swimmer, Saul                        | Saul Swimmer        | tt0181398        |
| 1746465359        | 1945        | 1945        | The White Gorilla                        | The White Gorilla                         | Fraser, H. L.; Nelson, Jack          | Harry L. Fraser     | tt0039987        |
| <b>1746409464</b> | <b>1984</b> | <b>1984</b> | <b>This Is Spinal Tap</b>                | <b>This Is Spinal Tap</b>                 | <b>Reiner, Rob</b>                   | <b>Rob Reiner</b>   | <b>tt0088258</b> |
| 1746530723        | 1948        | 1947        | Junction 88                              | Junction 88                               | Quigley, George P.                   | George P. Quigley   | tt0039522        |
| 1746520947        | 1950        | 1950        | The Glass Menagerie                      | The Glass Menagerie                       | Rapper, Irving                       | Irving Rapper       | tt0042509        |
| 1746584461        | 1930        | 1930        | Hell's Island                            | Hell's Island                             | Sloman, Edward                       | Edward Sloman       | tt0020961        |
| 1746584593        | 1929        | 1929        | The Ridin' Demon                         | The Ridin' Demon                          | Taylor, Ray                          | Ray Taylor          | tt0020331        |
| 1746574859        | 1933        | 1933        | Supernatural                             | Supernatural                              | Halperin, Victor                     | Victor Halperin     | tt0024631        |
| 1746524420        | 1923        | 1923        | The Sting of the Scorpion                | Sting of the Scorpion                     | Hatton, Richard                      | Dick Hatton         | tt0127903        |
| 1746570209        | 1934        | 1934        | We Live Again                            | We Live Again                             | Mamoulian, Rouben                    | Rouben Mamoulian    | tt0025964        |
| 1746424380        | 1942        | 1942        | Mrs. Miniver                             | Mrs. Miniver                              | Wyer, William                        | William Wyler       | tt0035093        |
| 1746562392        | 1953        | 1953        | The Kid from Left Field                  | The Kid from Left Field                   | Jones, Harmon                        | Harmon Jones        | tt0045958        |
| 1746582822        | 1937        | 1937        | Wee Willie Winkie                        | Wee Willie Winkie                         | Ford, John                           | John Ford           | tt0029751        |
| 1745303078        | 2007        | 2007        | The Bucket List                          | The Bucket List                           | Reiner, Rob                          | Rob Reiner          | tt0825232        |
| 1746436555        | 1942        | 1942        | Phantom Killer                           | Phantom Killer                            | Beaudine, William                    | William Beaudine    | tt0035185        |
| 1746487907        | 1919        | 1919        | The Brand                                | The Brand                                 | Barker, Reginald                     | Reginald Barker     | tt0009960        |
| 1746198213        | 1969        | 1969        | It Takes All Kinds                       | It Takes All Kinds                        | Davis, Eddie                         | Eddie Davis         | tt0064500        |
| 1746497040        | 1919        | 1918        | A Girl Named Mary                        | A Girl Named Mary                         | Edwards, Walter                      | Walter Edwards      | tt0010171        |
| 1746582644        | 1935        | 1935        | The Lives of a Bengal Lancer             | The Lives of a Bengal Lancer              | Hathaway, Henry                      | Henry Hathaway      | tt0026643        |
| 1746438692        | 1996        | 1996        | Jerry Maguire                            | Jerry Maguire                             | Crowe, Cameron                       | Cameron Crowe       | tt0116695        |
| 1746585458        | 1940        | 1940        | Forgotten Girls                          | Forgotten Girls                           | Rosen, Phil                          | Phil Rosen          | tt0032485        |
| 1746438129        | 1999        | 1999        | The Talented Mr. Ripley                  | The Talented Mr. Ripley                   | Minghella, Anthony                   | Anthony Minghella   | tt0134119        |
| 1746585281        | 1929        | 1929        | Chinatown Nights                         | Chinatown Nights                          | Wellman, William A.                  | William A. Wellman  | tt0019765        |
| 1746577390        | 1960        | 1960        | Wild River                               | Wild River                                | Kazan, Elia                          | Elia Kazan          | tt0054476        |
| 1745340805        | 2001        | 2001        | Gosford Park                             | Gosford Park                              | Altman, Robert                       | Robert Altman       | tt0280707        |
| 1746581886        | 1910        | 1910        | He Joined the Frat                       | He Joined the Frat                        |                                      |                     | tt1799102        |
| 1746584192        | 1936        | 1936        | Sea Spoilers                             | Sea Spoilers                              | Strayer, Frank                       | Frank R. Strayer    | tt0028227        |
| 1746520139        | 1924        | 1924        | Little Robinson Crusoe                   | Little Robinson Crusoe                    | Cline, Edward                        | Edward F. Cline     | tt0015074        |
| 1746574035        | 1956        | 1956        | Reprisal!                                | Reprisal!                                 | Sherman, George                      | George Sherman      | tt0049668        |
| 1746577176        | 1959        | 1959        | The Gunfight at Dodge City               | The Gunfight at Dodge City                | Newman, Joseph M.                    | Joseph M. Newman    | tt0051688        |

1

1

|            |      |      |                            |                            |                               |                        |           |
|------------|------|------|----------------------------|----------------------------|-------------------------------|------------------------|-----------|
| 1746419184 | 1987 | 1987 | Slumber Party Massacre II  | Slumber Party Massacre II  | Brock, Deborah                | Deborah Brock          | tt0093996 |
| 1746465013 | 1944 | 1944 | Guest in the House         | Guest in the House         | Brahm, John; Milestone, Lewis | John Brahm             | tt0036886 |
| 1746520316 | 1924 | 1924 | The Last Man               | The Last Man               | Reel, Frederick               | Frederick Reel Jr.     | tt0330546 |
| 1746210804 | 1971 | 1971 | Le Mans                    | Le Mans                    | Katzin, Lee H.; Sturges, John | Lee H. Katzin          | tt0067334 |
| 1746408453 | 1988 | 1987 | Promised Land              | Promised Land              | Hoffman, Michael              | Michael Hoffman        | tt0095916 |
| 1746503542 | 1922 | 1922 | One Week of Love           | One Week of Love           | Archainbaud, George           | George Archainbaud     | tt0013463 |
| 1746570044 | 1933 | 1933 | The Lone Avenger           | The Lone Avenger           | James, Alan                   | Alan James             | tt0024267 |
| 1746583236 | 1930 | 1930 | The Cuckoos                | The Cuckoos                | Sloane, Paul                  | Paul Sloane            | tt0020799 |
| 1746580503 | 1935 | 1935 | Murder by Television       | Murder by Television       | Sanforth, Clifford            | Clifford Sanforth      | tt0026740 |
| 1746574492 | 1934 | 1934 | Jimmy the Gent             | Jimmy the Gent             | Curtiz, Michael               | Michael Curtiz         | tt0025330 |
| 1746420891 | 1994 | 1994 | Go Fish                    | Go Fish                    | Troche, Rose                  | Rose Troche            | tt0109913 |
| 1746584071 | 1936 | 1936 | Pigskin Parade             | Pigskin Parade             | Butler, David                 | David Butler           | tt0028103 |
| 1746514753 | 1910 | 1910 | Where the Winds Blow       | Where the Winds Blow       |                               | Laurence Trimble       | tt0340435 |
| 1746577187 | 1958 | 1958 | Wind Across the Everglades | Wind Across the Everglades | Ray, Nicholas                 | Nicholas Ray           | tt0052395 |
| 1746582335 | 1929 | 1929 | No Defense                 | No Defense                 | Bacon, Lloyd                  | Lloyd Bacon            | tt0020222 |
| 1746492463 | 1948 | 1948 | Summer Holiday             | Summer Holiday             | Mamoulian, Rouben             | Rouben Mamoulian       | tt0040848 |
| 1746474526 | 1944 | 1943 | Cry 'Havoc'                | Cry 'Havoc'                | Thorpe, Richard               | Richard Thorpe         | tt0035770 |
| 1745394374 | 2010 | 2010 | Piranha 3D                 | Piranha 3D                 | Aja, Alexandre                | Alexandre Aja          | tt0464154 |
| 1746199290 | 1967 | 1967 | Enter Laughing             | Enter Laughing             | Reiner, Carl                  | Carl Reiner            | tt0061626 |
| 1746465300 | 1945 | 1945 | The Tiger Woman            | The Tiger Woman            | Ford, Philip                  | Philip Ford            | tt0274965 |
| 1746514917 | 1916 | 1916 | The Vixen                  | The Vixen                  | Edwards, J. Gordon            | J. Gordon Edwards      | tt0007524 |
| 1746585478 | 1939 | 1939 | Our Leading Citizen        | Our Leading Citizen        | Santell, Alfred               | Alfred Santell         | tt0031767 |
| 1746211494 | 1970 | 1970 | The Molly Maguires         | The Molly Maguires         | Ritt, Martin                  | Martin Ritt            | tt0066090 |
| 1746422220 | 1998 | 1998 | City of Angels             | City of Angels             | Silberling, Brad              | Brad Silberling        | tt0120632 |
| 1746512620 | 1927 | 1927 | The Devil's Saddle         | The Devil's Saddle         | Rogell, Albert                | Albert S. Rogell       | tt0017807 |
| 1746198214 | 1969 | 1969 | The Chairman               | The Chairman               | Thompson, J. Lee              | J. Lee Thompson        | tt0064148 |
| 1746582430 | 1935 | 1935 | Shanghai                   | Shanghai                   | Flood, James                  | James Flood            | tt0026982 |
| 1746208323 | 1969 | 1969 | The Valley of Gwangi       | The Valley of Gwangi       | O'Connolly, Jim               | Jim O'Connolly         | tt0065163 |
| 1746554467 | 1963 | 1963 | A Ticklish Affair          | A Ticklish Affair          | Sidney, George                | George Sidney          | tt0057583 |
| 1746454816 | 1944 | 1944 | Lady, Let's Dance!         | Lady, Let's Dance          | Woodruff, Frank               | Frank Woodruff         | tt0037002 |
| 1746577741 | 1936 | 1936 | Lady Luck                  | Lady Luck                  | Lamont, Charles               | Charles Lamont         | tt0027863 |
| 1746568297 | 1934 | 1934 | The Loudspeaker            | The Loudspeaker            | Santley, Joseph               | Joseph Santley         | tt0025427 |
| 1745293750 | 2005 | 2005 | Diary of a Mad Black Woman | Diary of a Mad Black Woman | Grant, Darren                 | Darren Grant           | tt0422093 |
| 1746504048 | 1920 | 1920 | Under Crimson Skies        | Under Crimson Skies        | Ingram, Rex                   | Rex Ingram             | tt0011805 |
| 1746569730 | 1953 | 1953 | Dream Wife                 | Dream Wife                 | Sheldon, Sidney               | Sidney Sheldon         | tt0045706 |
| 1746566061 | 1958 | 1958 | The Big Country            | The Big Country            | Wyler, William                | William Wyler          | tt0051411 |
| 1746559910 | 1964 | 1964 | Father Goose               | Father Goose               | Nelson, Ralph                 | Ralph Nelson           | tt0058092 |
| 1746500550 | 1924 | 1924 | Men                        | Men                        | Buchowetzki, Dimitri          | Dimitri Buchowetzki    | tt0015130 |
| 1746555501 | 1956 | 1956 | The Price of Fear          | The Price of Fear          | Biberman, Abner               | Abner Biberman         | tt0049636 |
| 1746467413 | 1917 | 1917 | Mary Lawson's Secret       | Mary Lawson's Secret       | O'Brien, John B.              | John B. O'Brien        | tt0178740 |
| 1746567433 | 1952 | 1952 | The First Time             | The First Time             | Tashlin, Frank                | Frank Tashlin          | tt0044619 |
| 1746455933 | 1998 | 1997 | Full Tilt Boogie           | Full Tilt Boogie           | Kelly, Sarah                  | Sarah Kelly            | tt0119165 |
| 1746501426 | 1915 | 1915 | Captain Macklin            | Captain Macklin            | O'Brien, John B.              | John B. O'Brien        | tt0003751 |
| 1746577614 | 1934 | 1934 | The World Accuses          | The World Accuses          | Lamont, Charles               | Charles Lamont         | tt0027230 |
| 1746514914 | 1915 | 1915 | Should a Mother Tell?      | Should a Mother Tell       | Edwards, J. Gordon            | J. Gordon Edwards      | tt0006038 |
| 1746567734 | 1933 | 1933 | Gold Diggers of 1933       | Gold Diggers of 1933       | LeRoy, Mervyn                 | Mervyn LeRoy           | tt0024069 |
| 1746520845 | 1925 | 1925 | The Right Man              | The Right Man              | Harvey, John                  | Jack Harvey            | tt0338385 |
| 1746516046 | 1921 | 1921 | A Small Town Idol          | A Small Town Idol          | Kenton, Erle                  | Erle C. Kenton         | tt0012701 |
| 1746515773 | 1917 | 1917 | Tom Sawyer                 | Tom Sawyer                 | Taylor, William D.            | William Desmond Taylor | tt0008687 |
| 1746250131 | 1976 | 1976 | The Student Body           | The Student Body           | Trikonis, Gus                 | Gus Trikonis           | tt0075278 |
| 1746570059 | 1934 | 1934 | Little Men                 | Little Men                 | Rosen, Phil                   | Phil Rosen             | tt0026636 |
| 1746503716 | 1917 | 1917 | The Silent Master          | The Silent Master          | Perret, Léonce                | Léonce Perret          | tt0008572 |
| 1746583830 | 1931 | 1931 | Beau Ideal                 | Beau Ideal                 | Brenon, Herbert               | Herbert Brenon         | tt0020673 |
| 1746554206 | 1963 | 1963 | The Great Escape           | The Great Escape           | Sturges, John                 | John Sturges           | tt0057115 |
| 1746562406 | 1955 | 1955 | Soldier of Fortune         | Soldier of Fortune         | Dmytryk, Edward               | Edward Dmytryk         | tt0048640 |
| 1746486144 | 1919 | 1919 | A Gun Fightin' Gentleman   | A Gun Fightin' Gentleman   | Ford, Jack                    | John Ford              | tt0010198 |
| 1769970092 | 1912 | 1912 | The Voice of Warning       | The Voice of Warning       |                               | Hardee Kirkland        | tt0433137 |

|            |      |      |                                                 |                                              |                           |                                     |           |
|------------|------|------|-------------------------------------------------|----------------------------------------------|---------------------------|-------------------------------------|-----------|
| 1746520552 | 1925 | 1925 | Body and Soul                                   | Body and Soul                                | Micheaux, Oscar           | Oscar Micheaux                      | tt0015634 |
| 1746567435 | 1933 | 1933 | Strawberry Roan                                 | Strawberry Roan                              | James, Alan               | Alan James                          | tt0024026 |
| 1746454292 | 1943 | 1943 | Sweet Rosie O'Grady                             | Sweet Rosie O'Grady                          | Cummings, Irving          | Irving Cummings                     | tt0036406 |
| 1746495692 | 1919 | 1919 | His Official Fiancée                            | His Official Fiancée                         | Vignola, Robert G.        | Robert G. Vignola                   | tt0009182 |
| 1746516289 | 1920 | 1920 | The Man from Nowhere                            | A Man from Nowhere                           | Ford, Francis             | Francis Ford                        | tt0011433 |
| 1746515770 | 1922 | 1922 | The Long Chance                                 | The Long Chance                              | Conway, Jack              | Jack Conway                         | tt0013329 |
| 1746568128 | 1932 | 1932 | Flaming Guns                                    | Flaming Guns                                 | Rosson, Arthur            | Arthur Rosson                       | tt0022896 |
| 1746501108 | 1916 | 1916 | The Raiders                                     | The Raiders                                  | Swickard, Charles         | Charles Swickard                    | tt0007244 |
| 1745342896 | 2002 | 2002 | Star Trek Nemesis                               | Star Trek: Nemesis                           | Baird, Stuart             | Stuart Baird                        | tt0253754 |
| 1746497901 | 1921 | 1921 | Hearts of the Woods                             | Hearts of the Woods                          | Calnek, Roy               | Roy Calnek                          | tt0330381 |
| 1746507881 | 1926 | 1926 | The Quarterback                                 | The Quarterback                              | Newmeyer, Fred            | Fred C. Newmeyer                    | tt0017300 |
| 1745342713 | 2004 | 2004 | Fahrenheit 9/11                                 | Fahrenheit 9/11                              | Moore, Michael            | Michael Moore                       | tt0361596 |
| 1746574392 | 1960 | 1960 | High School Caesar                              | High School Caesar                           | Ireland, O'Dale           | O'Dale Ireland                      | tt0053911 |
| 1746233158 | 1969 | 1969 | The Night of the Following Day                  | The Night of the Following Day               | Cornfield, Hubert         | Hubert Cornfield                    | tt0064728 |
| 1746585156 | 1929 | 1929 | It's a Great Life                               | It's a Great Life                            | Wood, Sam                 | Sam Wood                            | tt0020034 |
| 1745272576 | 2000 | 2000 | Small Time Crooks                               | Small Time Crooks                            | Allen, Woody              | Woody Allen                         | tt0196216 |
| 1746580226 | 1939 | 1939 | Beauty for the Asking                           | Beauty for the Asking                        | Tryon, Glenn              | Glenn Tryon                         | tt0031089 |
| 1746393084 | 1985 | 1985 | Jagged Edge                                     | Jagged Edge                                  | Marquand, Richard         | Richard Marquand                    | tt0089360 |
| 1746454056 | 1943 | 1943 | Calaboose                                       | Calaboose                                    | Roach, Hal                | Hal Roach Jr.                       | tt0236048 |
| 1746585316 | 1930 | 1930 | The Woman Who Was Forgotten                     | The Woman Who Was Forgotten                  | Thomas, Richard           | Richard Thomas                      | tt0021560 |
| 1746582924 | 1935 | 1935 | Lightning Triggers                              | Lightning Triggers                           | Luby, S. Roy              | S. Roy Luby                         | tt0127656 |
| 1746507835 | 1927 | 1926 | The Outlaw Breaker                              | The Outlaw Breaker                           | Jaccard, Jacques          | Jacques Jaccard                     | tt0127713 |
| 1746569508 | 1956 | 1956 | Miami Exposé                                    | Miami Exposé                                 | Sears, Fred F.            | Fred F. Sears                       | tt0049500 |
| 1746582303 | 1950 | 1950 | The Traveling Saleswoman                        | The Traveling Saleswoman                     | Riesner, Charles F.       | Charles Reisner                     | tt0043065 |
| 1746210547 | 1972 | 1972 | Sweet Sugar                                     | Sweet Sugar                                  | Levesque, Michel          | Michel Levesque                     | tt0069336 |
| 1746465285 | 1944 | 1944 | Moon Over Las Vegas                             | Moon Over Las Vegas                          | Yarbrough, Jean           | Jean Yarbrough                      | tt0037085 |
| 1746573834 | 1958 | 1958 | The Hot Angel                                   | The Hot Angel                                | Parker, Joe               | Joe Parker                          | tt0051740 |
| 1746508985 | 1924 | 1924 | South of Santa Fe                               | South of Santa Fe                            | Dixon, Denver             | Victor Adamson                      | tt0340996 |
| 1746508052 | 1924 | 1924 | The Arab                                        | The Arab                                     | Ingram, Rex               | Rex Ingram                          | tt0014679 |
| 1746520722 | 1925 | 1925 | Her Sister From Paris                           | Her Sister from Paris                        | Franklin, Sidney          | Sidney Franklin                     | tt0015909 |
| 1746502170 | 1910 | 1910 | A Vein of Gold                                  | A Vein of Gold                               |                           | Gilbert M. 'Broncho Billy' Anderson | tt0001442 |
| 1746509062 | 1950 | 1950 | Guilty Bystander                                | Guilty Bystander                             | Lerner, Joseph            | Joseph Lerner                       | tt0042529 |
| 1746566209 | 1957 | 1957 | Journey to Freedom                              | Journey to Freedom                           | Dertano, Robert C.        | Robert C. Dertano                   | tt0050571 |
| 1746500515 | 1924 | 1924 | In Every Woman's Life                           | In Every Woman's Life                        | Cummings, Irving          | Irving Cummings                     | tt0015010 |
| 1746514784 | 1910 | 1910 | The Matinee Idol                                | The Matinee Idol                             |                           | Joseph A. Golden                    | tt0291335 |
| 1745396075 | 2010 | 2009 | See What I'm Saying: The Deaf Entertainers Docu | See What I'm Saying: The Deaf Entertainers [ | Scarl, Hilari             | Hilari Scarl                        | tt1125387 |
| 1746584927 | 1939 | 1939 | Some Like It Hot                                | Some Like It Hot                             | Archainbaud, George       | George Archainbaud                  | tt0031950 |
| 1746467441 | 1917 | 1917 | The Law That Failed                             | The Law That Failed                          | Ridgely, Richard          | Richard Ridgely                     | tt0176922 |
| 1746210296 | 1971 | 1971 | B. S. I Love You                                | B.S. I Love You                              | Stern, Steven Hillard     | Steven Hilliard Stern               | tt0066803 |
| 1746555346 | 1957 | 1957 | Tip on a Dead Jockey                            | Tip on a Dead Jockey                         | Thorpe, Richard           | Richard Thorpe                      | tt0051088 |
| 1746504119 | 1917 | 1917 | Billy and the Big Stick                         | Billy and the Big Stick                      | Griffith, Edward H.       | Edward H. Griffith                  | tt0167050 |
| 1746410849 | 1994 | 1993 | Even Cowgirls Get the Blues                     | Even Cowgirls Get the Blues                  | Van Sant, Jr., Gus        | Gus Van Sant                        | tt0106834 |
| 1746524409 | 1914 | 1914 | Cardinal Richelieu's Ward                       | Cardinal Richelieu's Ward                    |                           | Eugene Moore                        | tt0003756 |
| 1746580627 | 1938 | 1938 | Song of the Buckaroo                            | Song of the Buckaroo                         |                           | Albert Herman                       | tt0031952 |
| 1746438727 | 1998 | 1997 | Hav Plenty                                      | Hav Plenty                                   | Cherot, Christopher Scott | Christopher Scott Cherot            | tt0126938 |
| 1746394215 | 1983 | 1982 | Hammett                                         | Hammett                                      | Wenders, Wim              | Wim Wenders                         | tt0085640 |
| 1769976122 | 1926 | 1926 | Movieland                                       | Movieland                                    | Taurog, Norman            | Norman Taurog                       | tt0121572 |
| 1746500318 | 1924 | 1924 | The Night Hawk                                  | The Night Hawk                               | Paton, Stuart             | Stuart Paton                        | tt0014308 |
| 1769969361 | 1965 | 1966 | Sins of the Fleshapoids                         | Sins of the Fleshapoids                      | Kuchar, Mike              | Mike Kuchar                         | tt0207104 |
| 1746274452 | 1980 | 1980 | Dressed to Kill                                 | Dressed to Kill                              | De Palma, Brian           | Brian De Palma                      | tt0080661 |
| 1746520447 | 1926 | 1926 | Bride of the Storm                              | Bride of the Storm                           | Blackton, J. Stuart       | J. Stuart Blackton                  | tt0016680 |
| 1746516285 | 1921 | 1921 | Jackie                                          | Jackie                                       | Ford, Jack                | John Ford                           | tt0012328 |
| 1746574676 | 1937 | 1937 | That I May Live                                 | That I May Live                              | Dwan, Allan               | Allan Dwan                          | tt0029651 |
| 1746520734 | 1950 | 1950 | All About Eve                                   | All About Eve                                | Mankiewicz, Joseph L.     | Joseph L. Mankiewicz                | tt0042192 |
| 1746410142 | 1989 | 1989 | Communion                                       | Communion                                    | Mora, Philippe            | Philippe Mora                       | tt0097100 |
| 1746577332 | 1951 | 1951 | Joe Palooka in Triple Cross                     | Joe Palooka in Triple Cross                  | LeBorg, Reginald          | Reginald Le Borg                    | tt0043689 |
| 1746514637 | 1916 | 1916 | A Bird of Prey                                  | A Bird of Prey                               | Nowland, Eugene           | Eugene Nowland                      | tt0157399 |

|            |      |      |                                               |                                            |                                 |                      |           |
|------------|------|------|-----------------------------------------------|--------------------------------------------|---------------------------------|----------------------|-----------|
| 1746513700 | 1916 | 1916 | The Narrow Path                               | The Narrow Path                            | Grandon, Francis J.             | Francis J. Grandon   | tt0007115 |
| 1746509333 | 1927 | 1927 | Poor Girls                                    | Poor Girls                                 | Craft, William James            | William James Craft  | tt0018271 |
| 1746408625 | 1991 | 1991 | Regarding Henry                               | Regarding Henry                            | Nichols, Mike                   | Mike Nichols         | tt0102768 |
| 1746569740 | 1954 | 1954 | The Saracen Blade                             | The Saracen Blade                          | Castle, William                 | William Castle       | tt0047448 |
| 1746520567 | 1925 | 1925 | He Who Laughs Last                            | He Who Laughs Last                         | Nelson, Jack                    | Jack Nelson          | tt0015899 |
| 1746500934 | 1910 | 1910 | Solving the Bond Theft                        | Solving the Bond Theft                     |                                 | Harry C. Mathews     | tt2288274 |
| 1746570181 | 1933 | 1933 | The Fighting Code                             | The Fighting Code                          | Hillyer, Lambert                | Lambert Hillyer      | tt0025110 |
| 1746573909 | 1958 | 1958 | South Pacific                                 | South Pacific                              | Logan, Joshua                   | Joshua Logan         | tt0052225 |
| 1746410817 | 1994 | 1994 | Clean Slate                                   | Clean Slate                                | Jackson, Mick                   | Mick Jackson         | tt0109443 |
| 1745372364 | 2001 | 2001 | Saving Silverman                              | Saving Silverman                           | Dugan, Dennis                   | Dennis Dugan         | tt0239948 |
| 1746585220 | 1929 | 1929 | Tiger Rose                                    | Tiger Rose                                 | Fitzmaurice, George             | George Fitzmaurice   | tt0020503 |
| 1746502863 | 1916 | 1916 | The Fable of Flora and Adolph and a Home Gone | The Fable of Flora and Adolph and a Home G | Baker, Richard Foster           | Richard Foster Baker | tt0006647 |
| 1746409352 | 1989 | 1989 | Cookie                                        | Cookie                                     | Seidelman, Susan                | Susan Seidelman      | tt0097109 |
| 1746575040 | 1936 | 1936 | Small Town Girl                               | Small Town Girl                            | Wellman, William A.             | William A. Wellman   | tt0028269 |
| 1769971906 | 1969 | 1969 | Anything Once                                 | Anything Once                              | Place, Graham                   | Graham Place         | tt0210532 |
| 1746437401 | 1941 | 1941 | Murder by Invitation                          | Murder by Invitation                       | Rosen, Phil                     | Phil Rosen           | tt0033928 |
| 1745372690 | 2008 | 2007 | The Life Before Her Eyes                      | The Life Before Her Eyes                   | Perelman, Vadim                 | Vadim Perelman       | tt0815178 |
| 1746219072 | 1975 | 1975 | Rosebud                                       | Rosebud                                    | Preminger, Otto                 | Otto Preminger       | tt0073637 |
| 1746567808 | 1932 | 1932 | Sky Bride                                     | Sky Bride                                  | Roberts, Stephen                | Stephen Roberts      | tt0023484 |
| 1746582831 | 1938 | 1938 | Rich Man, Poor Girl                           | Rich Man, Poor Girl                        | Schunzel, Reinhold              | Reinhold Schünzel    | tt0030679 |
| 1746208198 | 1967 | 1967 | Three Bites of the Apple                      | Three Bites of the Apple                   | Ganzer, Alvin                   | Alvin Ganzer         | tt0062364 |
| 1746464968 | 1944 | 1944 | Mystery Man                                   | Mystery Man                                | Archainbaud, George             | George Archainbaud   | tt0037113 |
| 1746500535 | 1926 | 1926 | The Wild Horse Stampede                       | The Wild Horse Stampede                    | Rogell, Albert                  | Albert S. Rogell     | tt0017558 |
| 1746580826 | 1937 | 1937 | My Dear Miss Aldrich                          | My Dear Miss Aldrich                       | Seitz, George B.                | George B. Seitz      | tt0029283 |
| 1746523271 | 1914 | 1914 | One of Our Girls                              | One of Our Girls                           | Heffron, Thomas N.              | Thomas N. Heffron    | tt0004433 |
| 1746424056 | 1943 | 1943 | Always a Bridesmaid                           | Always a Bridesmaid                        | Kenton, Erle C.                 | Erle C. Kenton       | tt0035629 |
| 1746423804 | 1941 | 1941 | Law of the Range                              | Law of the Range                           | Taylor, Ray                     | Ray Taylor           | tt0033819 |
| 1746555897 | 1955 | 1955 | Quentin Durward                               | Quentin Durward                            | Thorpe, Richard                 | Richard Thorpe       | tt0048528 |
| 1746235710 | 1977 | 1977 | Black Sunday                                  | Black Sunday                               | Frankenheimer, John             | John Frankenheimer   | tt0075765 |
| 1746466810 | 1917 | 1917 | Princess of the Dark                          | Princess of the Dark                       | Miller, Charles                 | Charles Miller       | tt0008462 |
| 1746512441 | 1915 | 1915 | The Suburban                                  | The Suburban                               | Lessey, George                  | George Lessey        | tt0006116 |
| 1746502680 | 1914 | 1914 | The Man Who Could Not Lose                    | The Man Who Could Not Lose                 | Blackwell, Carlyle              | Carlyle Blackwell    | tt0004291 |
| 1746560680 | 1932 | 1932 | The Mask of Fu Manchu                         | The Mask of Fu Manchu                      | Brabin, Charles; Vidor, Charles | Charles Brabin       | tt0023194 |
| 1746578423 | 1962 | 1962 | Tower of London                               | Tower of London                            | Corman, Roger                   | Roger Corman         | tt0056606 |
| 1746409990 | 1988 | 1988 | Beaches                                       | Beaches                                    | Marshall, Garry                 | Garry Marshall       | tt0094715 |
| 1746419794 | 1994 | 1994 | Legends of the Fall                           | Legends of the Fall                        | Zwick, Edward                   | Edward Zwick         | tt0110322 |
| 1746583654 | 1931 | 1931 | Traveling Husbands                            | Traveling Husbands                         | Sloane, Paul                    | Paul Sloane          | tt0022504 |
| 1746577771 | 1935 | 1935 | The Rainmakers                                | The Rainmakers                             | Guiol, Fred                     | Fred Guiol           | tt0026910 |
| 1746582092 | 1910 | 1910 | From Tyranny to Liberty                       | From Tyranny to Liberty                    |                                 | J. Searle Dawley     | tt0001226 |
| 1746512104 | 1914 | 1914 | Clothes                                       | Clothes                                    |                                 | Francis Powers       | tt0003778 |
| 1746578530 | 1963 | 1963 | The Balcony                                   | The Balcony                                | Powers, Francis                 | Francis Powers       | tt0003778 |
| 1746257194 | 1976 | 1976 | Baby Blue Marine                              | Baby Blue Marine                           | Strick, Joseph                  | Joseph Strick        | tt0056847 |
| 1746438479 | 1995 | 1995 | Jade                                          | Jade                                       | Hancock, John                   | John D. Hancock      | tt0074173 |
| 1746235088 | 1974 | 1974 | Ginger in the Morning                         | Ginger in the Morning                      | Friedkin, William               | William Friedkin     | tt0113451 |
| 1746584509 | 1930 | 1930 | Ridin' Law                                    | Ridin' Law                                 | Wiles, Gordon                   | Gordon Wiles         | tt0070107 |
| 1746491751 | 1947 | 1947 | Dangerous Venture                             | Dangerous Venture                          | Webb, Harry                     | Harry S. Webb        | tt0021299 |
| 1746394026 | 1989 | 1989 | Weekend at Bernie's                           | Weekend at Bernie's                        | Archainbaud, George             | George Archainbaud   | tt0039299 |
| 1746186107 | 1968 | 1968 | The Sergeant                                  | The Sergeant                               | Kotchegg, Ted                   | Ted Kotcheff         | tt0098627 |
| 1746435393 | 1997 | 1997 | Good Burger                                   | Good Burger                                | Flynn, John                     | John Flynn           | tt0063585 |
| 1746577373 | 1961 | 1961 | The Explosive Generation                      | The Explosive Generation                   | Robbins, Brian                  | Brian Robbins        | tt0119215 |
| 1746574170 | 1958 | 1958 | Sierra Baron                                  | Sierra Baron                               | Kulik, Buzz                     | Buzz Kulik           | tt0054862 |
| 1769970581 | 1967 | 1967 | Hot Thrills and Warm Chills                   | Hot Thrills and Warm Chills                | Clark, James B.                 | James B. Clark       | tt0052196 |
| 1746530696 | 1948 | 1948 | The Untamed Breed                             | The Untamed Breed                          | Berry, Dale                     | Dale Berry           | tt0061785 |
| 1746573754 | 1960 | 1960 | When Comedy Was King                          | When Comedy Was King                       | Lamont, Charles                 | Charles Lamont       | tt0040921 |
| 1746578912 | 1959 | 1958 | The Wild Women of Wongo                       | The Wild Women of Wongo                    |                                 | Robert Youngson      | tt0054468 |
| 1746211051 | 1973 | 1973 | Soylent Green                                 | Soylent Green                              | Wolcott, James L.               | James L. Wolcott     | tt0052394 |
| 1746508248 | 1924 | 1924 | The Stranger                                  | The Stranger                               | Fleischer, Richard              | Richard Fleischer    | tt0070723 |
|            |      |      |                                               |                                            | Henabery, Joseph                | Joseph Henabery      | tt0015372 |

|            |      |      |                                |                              |                       |                      |           |
|------------|------|------|--------------------------------|------------------------------|-----------------------|----------------------|-----------|
| 1746581728 | 1951 | 1951 | The Barefoot Mailman           | The Barefoot Mailman         | McEvoy, Earl          | Earl McEvoy          | tt0043319 |
| 1745359792 | 2004 | 2004 | Murder-Set-Pieces              | Murder Set Pieces            | Palumbo, Nick         | Nick Palumbo         | tt0422779 |
| 1746553912 | 1965 | 1965 | Mara of the Wilderness         | Mara of the Wilderness       | McDonald, Frank       | Frank McDonald       | tt0138593 |
| 1746577569 | 1936 | 1936 | Follow Your Heart              | Follow Your Heart            | Scotto, Aubrey        | Aubrey Scotto        | tt0027629 |
| 1746560553 | 1932 | 1932 | Behind Stone Walls             | Behind Stone Walls           | Strayer, Frank        | Frank R. Strayer     | tt0022662 |
| 1746524496 | 1910 | 1910 | The Trimming of Paradise Gulch | Trimming of Paradise Gulch   | Boggs, Frank          | Francis Boggs        | tt0001424 |
| 1746393221 | 1987 | 1987 | Number One with a Bullet       | Number One with a Bullet     | Smight, Jack          | Jack Smight          | tt0093658 |
| 1746566218 | 1954 | 1954 | Khyber Patrol                  | Khyber Patrol                | Friedman, Seymour     | Seymour Friedman     | tt0047146 |
| 1746509056 | 1926 | 1926 | Broken Homes                   | Broken Homes                 | Dierker, Hugh         | Hugh Dierker         | tt0016686 |
| 1769970660 | 1968 | 1968 | We a Family                    | We, a Family                 | Van Hearn, J.         | Jean Van Hearn       | tt0067965 |
| 1746514998 | 1914 | 1914 | The Port of Missing Men        | The Port of Missing Men      | Powers, Francis       | Francis Powers       | tt0004483 |
| 1746564242 | 1953 | 1953 | All American                   | All American                 | Hibbs, Jesse          | Jesse Hibbs          | tt0045490 |
| 1746500266 | 1924 | 1924 | Playthings of Desire           | Playthings of Desire         | King, Burton          | Burton L. King       | tt0015235 |
| 1746583098 | 1940 | 1940 | Irene                          | Irene                        | Wilcox, Herbert       | Herbert Wilcox       | tt0032638 |
| 1746575065 | 1933 | 1933 | Big Executive                  | Big Executive                | Kenton, Erle C.       | Erle C. Kenton       | tt0023809 |
| 1746436338 | 1942 | 1942 | Berlin Correspondent           | Berlin Correspondent         | Forde, Eugene         | Eugene Forde         | tt0034507 |
| 1769970706 | 1912 | 1912 | The Unending Love              | The Unending Love            |                       | Stanner E.V. Taylor  | tt1314872 |
| 1746435254 | 1942 | 1942 | Sundown Jim                    | Sundown Jim                  | Tinling, James        | James Tinling        | tt0035394 |
| 1745303213 | 2006 | 2006 | Snakes on a Plane              | Snakes on a Plane            | Ellis, David R.       | David R. Ellis       | tt0417148 |
| 1746509584 | 1924 | 1924 | After the Ball                 | After the Ball               | Fitzgerald, Dallas M. | Dallas M. Fitzgerald | tt0014649 |
| 1746570012 | 1960 | 1960 | Inherit the Wind               | Inherit the Wind             | Kramer, Stanley       | Stanley Kramer       | tt0053946 |
| 1746524828 | 1927 | 1927 | The Desired Woman              | The Desired Woman            | Curtiz, Michael       | Michael Curtiz       | tt0017805 |
| 1746199474 | 1968 | 1969 | Love Camp 7                    | Love Camp 7                  | Frost, R. L.          | Lee Frost            | tt0063242 |
| 1746438740 | 1999 | 1999 | Stuart Little                  | Stuart Little                | Minkoff, Rob          | Rob Minkoff          | tt0164912 |
| 1746409098 | 1988 | 1987 | Galactic Gigolo                | Galactic Gigolo              | Bechard, Gorman       | Gorman Bechard       | tt0095194 |
| 1746583110 | 1939 | 1939 | The Flying Irishman            | The Flying Irishman          | Jason, Leigh          | Leigh Jason          | tt0031325 |
| 1746553893 | 1964 | 1964 | Mail Order Bride               | Mail Order Bride             | Kennedy, Burt         | Burt Kennedy         | tt0058318 |
| 1746511774 | 1917 | 1917 | The Road Between               | The Road Between             | Levering, Joseph      | Joseph Levering      | tt0182390 |
| 1746568145 | 1932 | 1932 | The Last Mile                  | The Last Mile                | Bischoff, Sam         | Samuel Bischoff      | tt0023117 |
| 1745340119 | 2003 | 2003 | Head of State                  | Head of State                | Rock, Chris           | Chris Rock           | tt0325537 |
| 1746436077 | 1942 | 1942 | Duke of the Navy               | Duke of the Navy             | Beaudine, William     | William Beaudine     | tt0034689 |
| 1746437941 | 1943 | 1943 | A Night for Crime              | A Night for Crime            | Thurn-Taxis, Alexis   | Alexis Thurn         | tt0036202 |
| 1746569928 | 1954 | 1954 | Hell's Outpost                 | Hell's Outpost               | Kane, Joe             | Joseph Kane          | tt0047075 |
| 1746500165 | 1925 | 1925 | A Man Must Live                | A Man Must Live              | Sloane, Paul          | Paul Sloane          | tt0016073 |
| 1746218994 | 1980 | 1979 | The Black Stallion             | The Black Stallion           | Ballard, Carroll      | Carroll Ballard      | tt0078872 |
| 1746434681 | 1996 | 1996 | Looking for Richard            | Looking for Richard          | Pacino, Al            | Al Pacino            | tt0116913 |
| 1745341746 | 2003 | 2003 | Secondhand Lions               | Secondhand Lions             | McCanlies, Tim        | Tim McCanlies        | tt0327137 |
| 1746554817 | 1955 | 1955 | The Magnificent Matador        | The Magnificent Matador      | Boetticher, Budd      | Budd Boetticher      | tt0048331 |
| 1746464886 | 1944 | 1944 | Kismet                         | Kismet                       | Dieterle, William     | William Dieterle     | tt0036984 |
| 1745342808 | 2004 | 2004 | The Aviator                    | The Aviator                  | Scorsese, Martin      | Martin Scorsese      | tt0338751 |
| 1746419273 | 1940 | 1940 | Beyond the Sacramento          | Beyond the Sacramento        | Hillyer, Lambert      | Lambert Hillyer      | tt0033386 |
| 1746580719 | 1935 | 1935 | Our Little Girl                | Our Little Girl              | Robertson, John       | John S. Robertson    | tt0026835 |
| 1746520646 | 1926 | 1926 | Wife Tamers                    | Wife Tamers                  | Horne, James W.       | James W. Horne       | tt0017557 |
| 1746566107 | 1954 | 1953 | Geraldine                      | Geraldine                    | Springsteen, R. G.    | R.G. Springsteen     | tt0047020 |
| 1746571270 | 1935 | 1935 | Biography of a Bachelor Girl   | Biography of a Bachelor Girl | Griffith, Edward H.   | Edward H. Griffith   | tt0026117 |
| 1746495981 | 1918 | 1918 | A Man's Man                    | A Man's Man                  | Apfel, Oscar          | Oscar Apfel          | tt0008266 |
| 1746569941 | 1956 | 1956 | Star in the Dust               | Star in the Dust             | Haas, Charles         | Charles F. Haas      | tt0049793 |
| 1746422326 | 1940 | 1940 | South of Suez                  | South of Suez                | Seiler, Lewis         | Lewis Seiler         | tt0033083 |
| 1746580464 | 1935 | 1935 | The Revenge Rider              | The Revenge Rider            | Selman, David         | David Selman         | tt0133177 |
| 1746409031 | 1993 | 1993 | A Bronx Tale                   | A Bronx Tale                 | De Niro, Robert       | Robert De Niro       | tt0106489 |
| 1746580471 | 1937 | 1937 | China Passage                  | China Passage                | Killy, Edward         | Edward Killy         | tt0028715 |
| 1745282643 | 2006 | 2006 | Night of the Living Dead 3D    | Night of the Living Dead 3D  | Broadstreet, Jeff     | Jeff Broadstreet     | tt0489244 |
| 1746562208 | 1957 | 1957 | Dino                           | Dino                         | Carr, Thomas          | Thomas Carr          | tt0050316 |
| 1746530716 | 1950 | 1950 | Fancy Pants                    | Fancy Pants                  | Marshall, George      | George Marshall      | tt0042447 |
| 1745309452 | 2006 | 2006 | Click                          | Click                        | Coraci, Frank         | Frank Coraci         | tt0389860 |
| 1746514237 | 1927 | 1927 | The Frontiersman               | The Frontiersman             | Barker, Reginald      | Reginald Barker      | tt0017908 |
| 1746577676 | 1933 | 1933 | Looking Forward                | Looking Forward              | Brown, Clarence       | Clarence Brown       | tt0024269 |

|            |      |      |                                          |                                          |                                 |                      |           |
|------------|------|------|------------------------------------------|------------------------------------------|---------------------------------|----------------------|-----------|
| 1746410124 | 1981 | 1981 | Thief                                    | Thief                                    | Mann, Michael                   | Michael Mann         | tt0083190 |
| 1746508197 | 1924 | 1924 | Defying the Law                          | Defying the Law                          | Bracken, Bertram                | Bertram Bracken      | tt0014841 |
| 1746394243 | 1986 | 1986 | Big Trouble in Little China              | Big Trouble in Little China              | Carpenter, John                 | John Carpenter       | tt0090728 |
| 1746569825 | 1958 | 1958 | Revolt in the Big House                  | Revolt in the Big House                  | Springsteen, R. G.              | R.G. Springsteen     | tt0052133 |
| 1746500056 | 1945 | 1945 | Love, Honor and Goodbye                  | Love, Honor and Goodbye                  | Rogell, Albert S.               | Albert S. Rogell     | tt0037886 |
| 1746485925 | 1919 | 1919 | Pitfalls of a Big City                   | Pitfalls of a Big City                   | Lloyd, Frank                    | Frank Lloyd          | tt0010572 |
| 1746533036 | 1915 | 1915 | The Heights of Hazard                    | The Heights of Hazard                    | Lambart, Harry                  | Harry Lambart        | tt0005463 |
| 1746475283 | 1946 | 1946 | The Strange Love of Martha Ivers         | The Strange Love of Martha Ivers         | Milestone, Lewis                | Lewis Milestone      | tt0038988 |
| 1746453526 | 1942 | 1942 | Underground Agent                        | Underground Agent                        | Gordon, Michael                 | Michael Gordon       | tt0035488 |
| 1746500145 | 1924 | 1924 | Come On Cowboys                          | Come on Cowboys!                         | Hayes, Ward                     | Ward Hayes           | tt0014796 |
| 1746474814 | 1943 | 1943 | Submarine Alert                          | Submarine Alert                          | McDonald, Frank                 | Frank McDonald       | tt0036397 |
| 1746574480 | 1935 | 1935 | Princess O'Hara                          | Princess O'Hara                          | Burton, David                   | David Burton         | tt0026890 |
| 1746512455 | 1922 | 1922 | Four Hearts                              | Four Hearts                              | Wheeler, Leonard                | Leonard Wheeler      | tt0132981 |
| 1746394517 | 1985 | 1985 | Police Academy 2: Their First Assignment | Police Academy 2: Their First Assignment | Paris, Jerry                    | Jerry Paris          | tt0089822 |
| 1746499977 | 1924 | 1924 | In Hollywood with Potash and Perlmutter  | In Hollywood with Potash and Perlmutter  | Green, Alfred                   | Alfred E. Green      | tt0015011 |
| 1746464783 | 1941 | 1941 | Swing It Soldier                         | Swing It Soldier                         | Young, Harold                   | Harold Young         | tt0034255 |
| 1746453583 | 1943 | 1943 | The Ox-Bow Incident                      | The Ox-Bow Incident                      | Wellman, William A.             | William A. Wellman   | tt0036244 |
| 1746570212 | 1952 | 1952 | Feudin' Fools                            | Feudin' Fools                            | Beaudine, William               | William Beaudine     | tt0044612 |
| 1746571454 | 1931 | 1931 | The Smiling Lieutenant                   | The Smiling Lieutenant                   | Lubitsch, Ernst                 | Ernst Lubitsch       | tt0022074 |
| 1746565995 | 1954 | 1954 | Africa Adventure                         | Africa Adventure                         | Ruark, Robert C.                | Robert C. Ruark      | tt0186803 |
| 1746504606 | 1920 | 1920 | The Triple Clue                          | The Triple Clue                          | Collins, Tom                    | Tom Collins          | tt0188251 |
| 1746423482 | 1999 | 1999 | Snow Falling on Cedars                   | Snow Falling on Cedars                   | Hicks, Scott                    | Scott Hicks          | tt0120834 |
| 1746492095 | 1946 | 1946 | California Gold Rush                     | California Gold Rush                     | Springsteen, R. G.              | R.G. Springsteen     | tt0038393 |
| 1746514810 | 1916 | 1916 | The Seekers                              | The Seekers                              | Turner, Otis                    | Otis Turner          | tt0007321 |
| 1746583669 | 1930 | 1930 | One Mad Kiss                             | One Mad Kiss                             | Silver, Marcel; Tinling, James  | Marcel Silver        | tt0021215 |
| 1745341479 | 2004 | 2004 | Around the Bend                          | Around the Bend                          | Roberts, Jordan                 | Jordan Roberts       | tt0384810 |
| 1746582066 | 1929 | 1929 | The Hottentot                            | The Hottentot                            | Del Ruth, Roy                   | Roy Del Ruth         | tt0020002 |
| 1746585308 | 1929 | 1929 | The Leatherneck                          | The Leatherneck                          | Higgin, Howard                  | Howard Higgin        | tt0020088 |
| 1746515796 | 1920 | 1920 | Why Change Your Wife?                    | Why Change Your Wife?                    | DeMille, Cecil B.               | Cecil B. DeMille     | tt0011865 |
| 1746574570 | 1933 | 1933 | The Girl in 419                          | The Girl in 419                          | Hall, Alexander; Somnes, George | Alexander Hall       | tt0024065 |
| 1746475971 | 1947 | 1947 | Yankee Fakir                             | Yankee Fakir                             | Wilder, W. Lee                  | W. Lee Wilder        | tt0040008 |
| 1745359607 | 2004 | 2003 | Coffee and Cigarettes                    | Coffee and Cigarettes                    | Jarmusch, Jim                   | Jim Jarmusch         | tt0379217 |
| 1746565999 | 1953 | 1953 | The Girls of Pleasure Island             | The Girls of Pleasure Island             | Herbert, F. Hugh; Ganzer, Alvin | Alvin Ganzer         | tt0045819 |
| 1746525170 | 1919 | 1919 | Daddy-Long-Legs                          | Daddy Long Legs                          | Neilan, Marshall A.             | Marshall Neilan      | tt0010040 |
| 1746198098 | 1966 | 1966 | The Endless Summer                       | The Endless Summer                       | Brown, Bruce                    | Bruce Brown          | tt0060371 |
| 1746583117 | 1936 | 1936 | Paddy O'Day                              | Paddy O'Day                              | Seiler, Lewis                   | Lewis Seiler         | tt0026839 |
| 1746566867 | 1933 | 1932 | Lawyer Man                               | Lawyer Man                               | Dieterle, William               | William Dieterle     | tt0023125 |
| 1746578832 | 1951 | 1951 | When I Grow Up                           | When I Grow Up                           | Kanin, Michael                  | Michael Kanin        | tt0044206 |
| 1746530784 | 1950 | 1950 | House by the River                       | House by the River                       | Lang, Fritz                     | Fritz Lang           | tt0042579 |
| 1746584164 | 1939 | 1939 | A Woman Is the Judge                     | A Woman Is the Judge                     | Grindé, Nick                    | Nick Grinde          | tt0032141 |
| 1746512389 | 1913 | 1913 | Tess of the D'Urbervilles                | Tess of the D'Urbervilles                | Dawley, J. Searle               | J. Searle Dawley     | tt0003442 |
| 1746566133 | 1958 | 1958 | No Time for Sergeants                    | No Time for Sergeants                    | LeRoy, Mervyn                   | Mervyn LeRoy         | tt0052005 |
| 1746500970 | 1914 | 1914 | Michael Strogoff                         | Michael Strogoff                         | Carleton, Lloyd B.              | Lloyd B. Carleton    | tt0004328 |
| 1746570300 | 1934 | 1934 | Student Tour                             | Student Tour                             | Riesner, Charles F.             | Charles Reisner      | tt0025843 |
| 1746435893 | 1992 | 1992 | Forever Young                            | Forever Young                            | Miner, Steve                    | Steve Miner          | tt0104291 |
| 1746487727 | 1918 | 1918 | Humdrum Brown                            | Humdrum Brown                            | Ingram, Rex                     | Rex Ingram           | tt0009211 |
| 1746511815 | 1915 | 1915 | Mistress Nell                            | Mistress Nell                            | Kirkwood, James                 | James Kirkwood       | tt0005756 |
| 1746570880 | 1933 | 1933 | Bondage                                  | Bondage                                  | Santell, Alfred                 | Alfred Santell       | tt0023826 |
| 1746583026 | 1940 | 1940 | It All Came True                         | It All Came True                         | Seiler, Lewis                   | Lewis Seiler         | tt0032643 |
| 1746569913 | 1958 | 1958 | Gang War                                 | Gang War                                 | Fowler, Gene                    | Gene Fowler Jr.      | tt0051647 |
| 1746251483 | 1977 | 1977 | The Goodbye Girl                         | The Goodbye Girl                         | Ross, Herbert                   | Herbert Ross         | tt0076095 |
| 1745396293 | 2010 | 2010 | Easy A                                   | Easy A                                   | Gluck, Will                     | Will Gluck           | tt1282140 |
| 1746464982 | 1942 | 1942 | Arizona Round-up                         | Arizona Round Up                         | Tansey, Robert                  | Robert Emmett Tansey | tt0034468 |
| 1746256761 | 1975 | 1975 | Funny Lady                               | Funny Lady                               | Ross, Herbert                   | Herbert Ross         | tt0073026 |
| 1746235247 | 1973 | 1973 | Slaughter's Big Rip-Off                  | Slaughter's Big Rip Off                  | Douglas, Gordon                 | Gordon Douglas       | tt0070706 |
| 1746553643 | 1965 | 1965 | Tobo, the Happy Clown                    | Tobo the Happy Clown                     | Rowland, William                | Edward Finney        | tt0203988 |
| 1746520166 | 1925 | 1925 | Wreckage                                 | Wreckage                                 | Dunlap, Scott R.                | Scott R. Dunlap      | tt0016552 |

|            |      |      |                                    |                                    |                      |                                     |           |
|------------|------|------|------------------------------------|------------------------------------|----------------------|-------------------------------------|-----------|
| 1746234954 | 1966 | 1966 | The Texican                        | The Texican                        | Selander, Lesley     | Lesley Selander                     | tt0061081 |
| 1746582441 | 1939 | 1939 | The Story of Alexander Graham Bell | The Story of Alexander Graham Bell | Cummings, Irving     | Irving Cummings                     | tt0031981 |
| 1746454627 | 1946 | 1946 | Heartbeat                          | Heartbeat                          | Wood, Sam            | Sam Wood                            | tt0038592 |
| 1746582606 | 1938 | 1938 | When Were You Born                 | When Were You Born                 | McGann, William      | William C. McGann                   | tt0030968 |
| 1746419782 | 1989 | 1989 | The War of the Roses               | The War of the Roses               | DeVito, Danny        | Danny DeVito                        | tt0098621 |
| 1745359038 | 2002 | 2001 | Night at the Golden Eagle          | Night at the Golden Eagle          | Rifkin, Adam         | Adam Rifkin                         | tt0250617 |
| 1746424233 | 1940 | 1940 | The Cheyenne Kid                   | The Cheyenne Kid                   | Johnson, Raymond K.  | Bernard B. Ray                      | tt0032332 |
| 1746569710 | 1957 | 1957 | The Happy Road                     | The Happy Road                     | Kelly, Gene          | Gene Kelly                          | tt0050483 |
| 1746199804 | 1969 | 1969 | The Devil's 8                      | The Devil's 8                      | Topper, Burt         | Burt Topper                         | tt0064231 |
| 1746583784 | 1930 | 1930 | Not Damaged                        | Not Damaged                        | Sprague, Chandler    | Chandler Sprague                    | tt0021188 |
| 1746453885 | 1994 | 1994 | Only You                           | Only You                           | Jewison, Norman      | Norman Jewison                      | tt0110737 |
| 1746570017 | 1933 | 1933 | The Devil's in Love                | The Devil's in Love                | Dieterle, Wilhelm    | William Dieterle                    | tt0023945 |
| 1745339947 | 2003 | 2003 | Uptown Girls                       | Uptown Girls                       | Yakin, Boaz          | Boaz Yakin                          | tt0263757 |
| 1746584566 | 1931 | 1931 | Caught Plastered                   | Caught Plastered                   | Seiter, William      | William A. Seiter                   | tt0021725 |
| 1746475732 | 1946 | 1946 | The French Key                     | The French Key                     | Colmes, Walter       | Walter Colmes                       | tt0038536 |
| 1746516563 | 1920 | 1920 | Nothing But Lies                   | Nothing But Lies                   | Windom, Lawrence C.  | Lawrence C. Windom                  | tt0011518 |
| 1746572191 | 1932 | 1932 | The Crash                          | The Crash                          | Dieterle, William    | William Dieterle                    | tt0022784 |
| 1745282708 | 2007 | 2007 | The Number 23                      | The Number 23                      | Schumacher, Joel     | Joel Schumacher                     | tt0481369 |
| 1746570019 | 1933 | 1933 | The Way to Love                    | The Way to Love                    | Taugo, Norman        | Norman Taugo                        | tt0024755 |
| 1746582127 | 1928 | 1928 | Tropical Nights                    | Tropical Nights                    | Clifton, Elmer       | Elmer Clifton                       | tt0019495 |
| 1746582266 | 1951 | 1951 | The Vanishing Outpost              | The Vanishing Outpost              | Ormond, Ron          | Ron Ormond                          | tt0044180 |
| 1746567757 | 1932 | 1932 | Man Against Woman                  | Man Against Woman                  | Cummings, Irving     | Irving Cummings                     | tt0023178 |
| 1746453491 | 1941 | 1941 | She Knew All the Answers           | She Knew All the Answers           | Wallace, Richard     | Richard Wallace                     | tt0034179 |
| 1746523587 | 1916 | 1916 | The Undertow                       | The Undertow                       | Thorne, Frank        | Frank Thorne                        | tt0159072 |
| 1746585056 | 1930 | 1930 | Once a Gentleman                   | Once a Gentleman                   | Cruze, James         | James Cruze                         | tt0021210 |
| 1746582891 | 1936 | 1936 | The Country Doctor                 | The Country Doctor                 | King, Henry          | Henry King                          | tt0027469 |
| 1746208660 | 1969 | 1969 | Slaves                             | Slaves                             | Biberman, Herbert J. | Herbert J. Biberman                 | tt0064997 |
| 1746508522 | 1926 | 1926 | The Patent Leather Pug             | The Patent Leather Pug             | Rogell, Albert       | Albert S. Rogell                    | tt0147153 |
| 1746423430 | 1941 | 1941 | You'll Never Get Rich              | You'll Never Get Rich              | Lanfield, Sidney     | Sidney Lanfield                     | tt0034409 |
| 1746408516 | 1988 | 1988 | License to Drive                   | License to Drive                   | Beeman, Greg         | Greg Beeman                         | tt0095519 |
| 1746574397 | 1951 | 1951 | Honeychile                         | Honeychile                         | Springsteen, R. G.   | R.G. Springsteen                    | tt0043653 |
| 1746208377 | 1968 | 1968 | The Sea Gull                       | The Sea Gull                       | Lumet, Sidney        | Sidney Lumet                        | tt0063569 |
| 1746580831 | 1936 | 1936 | Rose-Marie                         | Rose Marie                         | Van Dyke, W. S.      | W.S. Van Dyke                       | tt0028207 |
| 1745302524 | 2005 | 2005 | Mrs. Palfrey at the Claremont      | Mrs. Palfrey at the Claremont      | Ireland, Dan         | Dan Ireland                         | tt0421229 |
| 1746578630 | 1959 | 1959 | Return of the Fly                  | Return of the Fly                  | Bernds, Edward L.    | Edward Bernds                       | tt0053219 |
| 1746584867 | 1929 | 1929 | Smilin' Guns                       | Smilin' Guns                       | MacRae, Henry        | Henry MacRae                        | tt0020420 |
| 1746500315 | 1950 | 1950 | For Heaven's Sake                  | For Heaven's Sake                  | Seaton, George       | George Seaton                       | tt0042472 |
| 1746502322 | 1915 | 1916 | The Evangelist                     | The Evangelist                     | O'Neil, Barry        | Barry O'Neil                        | tt0005254 |
| 1745339884 | 2003 | 2003 | X2                                 | X2                                 | Singer, Bryan        | Bryan Singer                        | tt0290334 |
| 1746582665 | 1938 | 1938 | Woman Against Woman                | Woman Against Woman                | Sinclair, Robert B.  | Robert B. Sinclair                  | tt0030983 |
| 1746585139 | 1930 | 1930 | The Texan                          | The Texan                          | Cromwell, John       | John Cromwell                       | tt0021463 |
| 1746185881 | 1968 | 1968 | Snow Treasure                      | Snow Treasure                      | Jacoby, Irving       | Irving Jacoby                       | tt0062282 |
| 1746485570 | 1918 | 1918 | The Struggle Everlasting           | The Struggle Everlasting           | Kirkwood, James      | James Kirkwood                      | tt0009661 |
| 1746520450 | 1927 | 1927 | Prince of the Plains               | Prince of the Plains               | Williamson, Robin    | Robin Williamson                    | tt0018284 |
| 1746420210 | 1993 | 1993 | Groundhog Day                      | Groundhog Day                      | Ramis, Harold        | Harold Ramis                        | tt0107048 |
| 1746520471 | 1949 | 1949 | Trapped                            | Trapped                            | Fleischer, Richard   | Richard Fleischer                   | tt0041983 |
| 1745293697 | 2005 | 2005 | Venom                              | Venom                              | Gillespie, Jim       | Jim Gillespie                       | tt0428251 |
| 1746235672 | 1979 | 1978 | Attack of the Killer Tomatoes      | Attack of the Killer Tomatoes!     | De Bello, John       | John De Bello                       | tt0080391 |
| 1746584511 | 1929 | 1929 | The Rainbow                        | The Rainbow                        | Barker, Reginald     | Reginald Barker                     | tt0020310 |
| 1746475945 | 1948 | 1948 | Devil's Cargo                      | Devil's Cargo                      | Link, John F.        | John F. Link Sr.                    | tt0040287 |
| 1746503873 | 1918 | 1918 | Selfish Yates                      | Selfish Yates                      | Hart, William S.     | William S. Hart                     | tt0009596 |
| 1746578906 | 1961 | 1961 | The George Raft Story              | The George Raft Story              | Newman, Joseph M.    | Joseph M. Newman                    | tt0054918 |
| 1746422620 | 1995 | 1995 | Village of the Damned              | Village of the Damned              | Carpenter, John      | John Carpenter                      | tt0114852 |
| 1746581956 | 1910 | 1910 | An Indian Girl's Love              | An Indian Girl's Love              |                      | Gilbert M. 'Broncho Billy' Anderson | tt0001269 |
| 1746578691 | 1959 | 1959 | The Journey                        | The Journey                        | Litvak, Anatole      | Anatole Litvak                      | tt0052950 |
| 1746542653 | 1924 | 1924 | Through the Dark                   | Through the Dark                   | Hill, George         | George W. Hill                      | tt0015410 |
| 1746500314 | 1926 | 1926 | Her Man o' War                     | Her Man o' War                     | Urson, Frank         | Frank Urson                         | tt0016959 |



|                   |             |             |                                      |                                      |                                  |                       |                  |
|-------------------|-------------|-------------|--------------------------------------|--------------------------------------|----------------------------------|-----------------------|------------------|
| 1746509204        | 1927        | 1927        | The Lone Eagle                       | The Lone Eagle                       | Johnson, Emory                   | Emory Johnson         | tt0018098        |
| 1745309393        | 2007        | 2007        | The Bourne Ultimatum                 | The Bourne Ultimatum                 | Greengrass, Paul                 | Paul Greengrass       | tt0440963        |
| <b>1746408646</b> | <b>1984</b> | <b>1984</b> | <b>Crimes of Passion</b>             | <b>Crimes of Passion</b>             | <b>Russell, Ken</b>              | <b>Ken Russell</b>    | <b>tt0087100</b> |
| 1746582499        | 1936        | 1936        | Desert Guns                          | Desert Guns                          | Hutchison, Charles               | Charles Hutchison     | tt0027512        |
| 1746434594        | 2000        | 2000        | Me, Myself & Irene                   | Me, Myself & Irene                   | Farrelly, Bobby; Farrelly, Peter | Bobby Farrelly        | tt0183505        |
| 1746491895        | 1946        | 1946        | Spook Busters                        | Spook Busters                        | Beaudine, William                | William Beaudine      | tt0038976        |
| 1746554749        | 1964        | 1964        | It's Hot on Sin Island               | It's Hot on Sin Island               | Marshall, Peter                  | Peter Marshall        | tt0141402        |
| 1746499900        | 1945        | 1945        | We Accuse                            | We Accuse                            |                                  | Joseph H. Zarovich    | tt5299256        |
| 1745340783        | 2002        | 2002        | The Banger Sisters                   | The Banger Sisters                   | Dolman, Bob                      | Bob Dolman            | tt0280460        |
| 1746574276        | 1963        | 1963        | Spencer's Mountain                   | Spencer's Mountain                   | Daves, Delmer                    | Delmer Daves          | tt0057523        |
| 1746465390        | 1945        | 1945        | Trouble Chasers                      | Trouble Chasers                      | Landers, Lew                     | Lew Landers           | tt0210367        |
| 1746576917        | 1951        | 1951        | Two Dollar Bettor                    | Two Dollar Bettor                    | Cahn, Edward L.                  | Edward L. Cahn        | tt0044155        |
| 1746569879        | 1955        | 1955        | Timberjack                           | Timberjack                           | Kane, Joe                        | Joseph Kane           | tt0048726        |
| 1746514695        | 1927        | 1927        | The Bush Leaguer                     | The Bush Leaguer                     | Bretherton, Howard               | Howard Bretherton     | tt0017720        |
| 1746434990        | 1997        | 1997        | The Sixth Man                        | The Sixth Man                        | Miller, Randall                  | Randall Miller        | tt0120142        |
| 1746542711        | 1924        | 1924        | The Triflers                         | The Triflers                         | Gasnier, Louis                   | Louis J. Gasnier      | tt0015429        |
| 1746484459        | 1917        | 1917        | War and the Woman                    | War and the Woman                    | Warde, Ernest C.                 | Ernest C. Warde       | tt0008748        |
| 1746235302        | 1974        | 1974        | Steppenwolf                          | Steppenwolf                          | Haines, Fred                     | Fred Haines           | tt0072206        |
| 1746583375        | 1930        | 1930        | Ex-Flame                             | Ex Flame                             | Halperin, Victor                 | Victor Halperin       | tt0021842        |
| 1746500648        | 1927        | 1927        | 7th Heaven                           | 7th Heaven                           | Borzage, Frank                   | Frank Borzage         | tt0183799        |
| 1746183731        | 1910        | 1910        | As It Is in Life                     | As It Is in Life                     | Griffith, D. W.                  | D.W. Griffith         | tt0001120        |
| 1746219611        | 1975        | 1975        | Dog Day Afternoon                    | Dog Day Afternoon                    | Lumet, Sidney                    | Sidney Lumet          | tt0072890        |
| 1746409778        | 1984        | 1984        | Indiana Jones and the Temple of Doom | Indiana Jones and the Temple of Doom | Spielberg, Steven                | Steven Spielberg      | tt0087469        |
| 1746584713        | 1930        | 1930        | Sunny                                | Sunny                                | Seiter, William                  | William A. Seiter     | tt0021435        |
| 1746566178        | 1956        | 1956        | Good-Bye, My Lady                    | Good bye, My Lady                    | Wellman, William A.              | William A. Wellman    | tt0049271        |
| 1746514408        | 1922        | 1922        | The Challenge                        | The Challenge                        | Terriss, Tom                     | Tom Terriss           | tt0013007        |
| 1746580927        | 1958        | 1958        | A Time to Love and a Time to Die     | A Time to Love and a Time to Die     | Sirk, Douglas                    | Douglas Sirk          | tt0052296        |
| 1746570838        | 1934        | 1934        | Maniac                               | Maniac                               | Esper, Dwain                     | Dwain Esper           | tt0025465        |
| 1746269737        | 1979        | 1979        | Rock 'n' Roll High School            | Rock 'n' Roll High School            | Arkush, Allan                    | Allan Arkush          | tt0079813        |
| 1746566131        | 1954        | 1954        | The Desperate Women                  | The Desperate Women                  | Appleton Jr., Louis B.           | Louis B. Appleton Jr. | tt0301192        |
| 1746507747        | 1927        | 1927        | Surrender!                           | Surrender                            | Sloman, Edward                   | Edward Sloman         | tt0018457        |
| 1746520472        | 1926        | 1926        | The Speed Limit                      | The Speed Limit                      | O'Connor, Frank                  | Frank O'Connor        | tt0166358        |
| 1769969452        | 1911        | 1911        | Desperate Desmond Almost Succeeds    | Desperate Desmond Almost Succeeds    |                                  | Tom Ricketts          | tt0213604        |
| 1745342650        | 2009        | 2009        | Not Forgotten                        | Not Forgotten                        | Soref, Dror                      | Dror Soref            | tt1127221        |
| 1769970668        | 1968        | 1968        | My Third Wife George                 | My Third Wife, George                | Kerwin, Harry E.                 | Harry Kerwin          | tt0063331        |
| 1746467843        | 1917        | 1917        | Molly Entangled                      | Molly Entangled                      | Thornby, Robert                  | Robert Thornby        | tt0178762        |
| 1746198877        | 1969        | 1969        | The Fabulous Bastard From Chicago    | The Fabulous Bastard from Chicago    | Corarito, Greg                   | Greg Corarito         | tt0136856        |
| 1746569664        | 1958        | 1958        | Day of the Bad Man                   | Day of the Badman                    | Keller, Harry                    | Harry Keller          | tt0051522        |
| 1746532429        | 1916        | 1916        | Shadows and Sunshine                 | Shadows and Sunshine                 | King, Henry                      | Henry King            | tt0007328        |
| 1746437928        | 1941        | 1941        | Lady Scarface                        | Lady Scarface                        | Woodruff, Frank                  | Frank Woodruff        | tt0033805        |
| 1746525037        | 1920        | 1920        | Deadline at Eleven                   | Deadline at Eleven                   | Fawcett, George                  | George Fawcett        | tt0011099        |
| 1746580942        | 1951        | 1951        | The Frogmen                          | The Frogmen                          | Bacon, Lloyd                     | Lloyd Bacon           | tt0043565        |
| 1746560806        | 1932        | 1932        | Breach of Promise                    | Breach of Promise                    | Stein, Paul L.                   | Paul L. Stein         | tt0022721        |
| 1746582543        | 1936        | 1936        | Roarin' Lead                         | Roarin' Lead                         | Wright, Mack V.; Newfield, Sam   | Sam Newfield          | tt0028194        |
| 1746503491        | 1918        | 1918        | Western Blood                        | Western Blood                        | Reynolds, Lynn F.                | Lynn Reynolds         | tt0009787        |
| 1746571551        | 1932        | 1932        | Beyond the Rockies                   | Beyond the Rockies                   | Allen, Fred                      | Fred Allen            | tt0022674        |
| 1746577966        | 1935        | 1934        | Range Warfare                        | Range Warfare                        | Luby, S. Roy                     | S. Roy Luby           | tt0203825        |
| 1746568334        | 1934        | 1933        | Mystic Hour                          | The Mystic Hour                      | DeLay, Melville                  | Melville De Lay       | tt0165397        |
| 1746582732        | 1938        | 1938        | Hollywood Stadium Mystery            | Hollywood Stadium Mystery            | Howard, David                    | David Howard          | tt0029012        |
| 1746578908        | 1959        | 1959        | Li'l Abner                           | Li'l Abner                           | Frank, Melvin                    | Melvin Frank          | tt0053001        |
| 1769969421        | 1911        | 1911        | A Pair of Gloves                     | A Pair of Gloves                     |                                  |                       | tt1282459        |
| 1746574642        | 1936        | 1936        | Rio Grande Ranger                    | Rio Grande Ranger                    | Bennet, Spencer Gordon           | Spencer Gordon Bennet | tt0029489        |
| 1746500078        | 1948        | 1948        | Harpoon                              | Harpoon                              | Scott, Ewing                     | Ewing Scott           | tt0040424        |
| 1746582785        | 1938        | 1938        | Letter of Introduction               | Letter of Introduction               | Stahl, John M.                   | John M. Stahl         | tt0030359        |
| 1746511760        | 1922        | 1922        | Golden Dreams                        | Golden Dreams                        | Hampton, Benjamin B.             | Benjamin B. Hampton   | tt0013189        |
| 1746562441        | 1953        | 1953        | Island in the Sky                    | Island in the Sky                    | Wellman, William A.              | William A. Wellman    | tt0045919        |
| 1746509023        | 1925        | 1925        | The Isle of Hope                     | The Isle of Hope                     | Nelson, Jack                     | Jack Nelson           | tt0124762        |

|            |      |      |                                                  |                                              |                       |                                     |           |
|------------|------|------|--------------------------------------------------|----------------------------------------------|-----------------------|-------------------------------------|-----------|
| 1746571207 | 1910 | 1910 | The Forest Ranger                                | The Forest Ranger                            |                       | Gilbert M. 'Broncho Billy' Anderson | tt0001222 |
| 1769974214 | 1970 | 1969 | Four on the Floor                                | Four on the Floor                            | Hansen, Kenneth       | Kenneth Hansen                      | tt0137579 |
| 1746570572 | 1934 | 1934 | Most Precious Thing in Life                      | Most Precious Thing in Life                  | Hillyer, Lambert      | Lambert Hillyer                     | tt0025516 |
| 1746570215 | 1952 | 1952 | Fargo                                            | Fargo                                        | Collins, Lewis        | Lewis D. Collins                    | tt0044603 |
| 1745359589 | 2008 | 2008 | Dear Zachary: A Letter to a Son About His Father | Dear Zachary: A Letter to a Son About His Fa | Kuenne, Kurt          | Kurt Kuenne                         | tt1152758 |
| 1746567596 | 1933 | 1933 | This Day and Age                                 | This Day and Age                             | DeMille, Cecil B.     | Cecil B. DeMille                    | tt0024656 |
| 1745282737 | 2005 | 2005 | The Skeleton Key                                 | The Skeleton Key                             | Softley, Iain         | Iain Softley                        | tt0397101 |
| 1746560825 | 1932 | 1932 | Red Haired Alibi                                 | Red Haired Alibi                             | Cabanne, Christy      | Christy Cabanne                     | tt0023384 |
| 1746502677 | 1914 | 1914 | Northern Lights                                  | Northern Lights                              | Lewis, Edgar          | Edgar Lewis                         | tt0004409 |
| 1746572790 | 1910 | 1910 | A Doctor's Perfidy                               | The Doctor's Perfidy                         |                       | Harry Solter                        | tt0200582 |
| 1746555725 | 1954 | 1954 | Fireman Save My Child                            | Fireman Save My Child                        | Goodwins, Leslie      | Leslie Goodwins                     | tt0046980 |
| 1746570750 | 1934 | 1934 | Port of Lost Dreams                              | Port of Lost Dreams                          | Strayer, Frank R.     | Frank R. Strayer                    | tt0026882 |
| 1746503574 | 1922 | 1922 | The Woman's Side                                 | The Woman's Side                             | Barry, J. A.          | J.A. Barry                          | tt0013783 |
| 1746578063 | 1938 | 1938 | Gunsmoke Trail                                   | Gunsmoke Trail                               | Newfield, Sam         | Sam Newfield                        | tt0030209 |
| 1746422961 | 1991 | 1991 | Pure Luck                                        | Pure Luck                                    | Tass, Nadia           | Nadia Tass                          | tt0102729 |
| 1769970702 | 1968 | 1968 | Sands of Ecstasy                                 | Sands of Ecstasy                             | Stouffer, Larry       | Larry N. Stouffer                   | tt0257090 |
| 1746501743 | 1914 | 1914 | Samson                                           | Samson                                       | MacDonald, J. Farrell | J. Farrell MacDonald                | tt0004558 |
| 1746582794 | 1938 | 1938 | Little Miss Broadway                             | Little Miss Broadway                         | Cummings, Irving      | Irving Cummings                     | tt0030371 |
| 1746500631 | 1927 | 1927 | Marriage                                         | Marriage                                     | Neill, R. William     | Roy William Neill                   | tt0018144 |
| 1746564222 | 1952 | 1952 | Scandal Sheet                                    | Scandal Sheet                                | Karlson, Phil         | Phil Karlson                        | tt0045124 |
| 1746420737 | 1994 | 1994 | Little Women                                     | Little Women                                 | Armstrong, Gillian    | Gillian Armstrong                   | tt0110367 |
| 1746509003 | 1924 | 1924 | The Martyr Sex                                   | The Martyr Sex                               | Worne, Duke           | Duke Worne                          | tt0015122 |
| 1746581439 | 1960 | 1960 | Barefoot Adventure                               | Barefoot Adventure                           | Brown, Bruce          | Bruce Brown                         | tt0297763 |
| 1746573877 | 1961 | 1961 | One, Two, Three                                  | One, Two, Three                              | Wilder, Billy         | Billy Wilder                        | tt0055256 |
| 1746571068 | 1933 | 1933 | Picture Snatcher                                 | Picture Snatcher                             | Bacon, Lloyd          | Lloyd Bacon                         | tt0024450 |
| 1746465072 | 1945 | 1944 | Nothing But Trouble                              | Nothing But Trouble                          | Taylor, Sam           | Sam Taylor                          | tt0037138 |
| 1746582246 | 1931 | 1931 | Grief Street                                     | Grief Street                                 | Thorpe, Richard       | Richard Thorpe                      | tt0142340 |
| 1746567306 | 1933 | 1933 | Man from Monterey                                | The Man from Monterey                        | Wright, Mack V.       | Mack V. Wright                      | tt0024293 |
| 1746581280 | 1962 | 1962 | Rebel Angel                                      | Rebel Angel                                  | Douglas, Lamont       | Lamont Douglas                      | tt0189042 |
| 1746582577 | 1935 | 1935 | The Goose and the Gander                         | The Goose and the Gander                     | Green, Alfred E.      | Alfred E. Green                     | tt0026426 |
| 1746532657 | 1927 | 1927 | Fire and Steel                                   | Fire and Steel                               | Bracken, Bertram      | Bertram Bracken                     | tt0132955 |
| 1746581194 | 1960 | 1960 | Platinum High School                             | Platinum High School                         | Haas, Charles         | Charles F. Haas                     | tt0054187 |
| 1746393340 | 1986 | 1986 | Hamburger...The Motion Picture                   | Hamburger: The Motion Picture                | Marvin, Mike          | Mike Marvin                         | tt0091165 |
| 1746516066 | 1920 | 1920 | Stop Thief                                       | Stop Thief                                   | Beaumont, Harry       | Harry Beaumont                      | tt0011734 |
| 1746393315 | 1986 | 1986 | Jo Jo Dancer, Your Life Is Calling               | Jo Jo Dancer, Your Life Is Calling           | Pryor, Richard        | Richard Pryor                       | tt0091295 |
| 1745293334 | 2006 | 2005 | 2001 Maniacs                                     | 2001 Maniacs                                 | Sullivan, Tim         | Tim Sullivan                        | tt0264323 |
| 1746218850 | 1973 | 1973 | Steelyard Blues                                  | Steelyard Blues                              | Myerson, Alan         | Alan Myerson                        | tt0070731 |
| 1746570995 | 1933 | 1933 | Hotel Variety                                    | Hotel Variety                                | Cannon, Raymond       | Raymond Cannon                      | tt0024142 |
| 1746473768 | 1944 | 1944 | Song of Nevada                                   | Song of Nevada                               | Kane, Joseph          | Joseph Kane                         | tt0037296 |
| 1746581048 | 1959 | 1959 | The Wasp Woman                                   | The Wasp Woman                               | Corman, Roger         | Roger Corman                        | tt0054462 |
| 1746509448 | 1925 | 1925 | Nine and Three-fifths Seconds                    | Nine and Three Fifths Seconds                | Carleton, Lloyd B.    | Lloyd B. Carleton                   | tt0141659 |
| 1746512214 | 1923 | 1923 | The White Flower                                 | The White Flower                             | Ivers, Julia Crawford | Julia Crawford Ivers                | tt0014603 |
| 1746454017 | 1941 | 1940 | This Thing Called Love                           | This Thing Called Love                       | Hall, Alexander       | Alexander Hall                      | tt0033154 |
| 1746533019 | 1923 | 1923 | Fighting Jim Grant                               | Fighting Jim Grant                           | Adcook, W.            | W. Adcook                           | tt0245898 |
| 1746501365 | 1915 | 1915 | A Child of God                                   | A Child of God                               | Adolfi, John G.       | John G. Adolfi                      | tt0005081 |
| 1746582610 | 1935 | 1935 | Straight from the Heart                          | Straight from the Heart                      | Beal, Scott R.        | Scott R. Beal                       | tt0027049 |
| 1769976719 | 1929 | 1929 | The Melancholy Dame                              | The Melancholy Dame                          | Gillstrom, Arvid E.   | Arvid E. Gillstrom                  | tt0019155 |
| 1746578668 | 1951 | 1951 | Home Town Story                                  | Home Town Story                              | Pierson, Arthur       | Arthur Pierson                      | tt0043651 |
| 1746560153 | 1963 | 1963 | Tarzan's Three Challenges                        | Tarzan's Three Challenges                    | Day, Robert           | Robert Day                          | tt0057560 |
| 1746421270 | 1993 | 1993 | Dennis the Menace                                | Dennis the Menace                            | Castle, Nick          | Nick Castle                         | tt0106701 |
| 1746421553 | 1992 | 1992 | Leaving Normal                                   | Leaving Normal                               | Zwick, Edward         | Edward Zwick                        | tt0104697 |
| 1746487914 | 1918 | 1918 | The Uphill Path                                  | The Uphill Path                              | Kirkwood, James       | James Kirkwood                      | tt0190113 |
| 1746584287 | 1939 | 1939 | Bulldog Drummond's Secret Police                 | Bulldog Drummond's Secret Police             | Hogan, James          | James P. Hogan                      | tt0031125 |
| 1746580678 | 1935 | 1935 | Lady Tubbs                                       | Lady Tubbs                                   | Crosland, Alan        | Alan Crosland                       | tt0026595 |
| 1746499974 | 1924 | 1924 | Reckless Speed                                   | Reckless Speed                               | Craft, William James  | William James Craft                 | tt0015266 |
| 1746571323 | 1934 | 1934 | His Greatest Gamble                              | His Greatest Gamble                          | Robertson, John       | John S. Robertson                   | tt0025256 |
| 1746504067 | 1918 | 1918 | The Blue Bird                                    | The Blue Bird                                | Tourneur, Maurice     | Maurice Tourneur                    | tt0008891 |

|            |      |      |                                   |                                   |                                  |                    |           |
|------------|------|------|-----------------------------------|-----------------------------------|----------------------------------|--------------------|-----------|
| 1746219131 | 1974 | 1974 | Policewomen                       | Policewomen                       | Frost, Lee                       | Lee Frost          | tt0072006 |
| 1746434895 | 1991 | 1991 | Company Business                  | Company Business                  | Meyer, Nicholas                  | Nicholas Meyer     | tt0101606 |
| 1746584281 | 1936 | 1936 | The Case of the Black Cat         | The Case of the Black Cat         | McGann, William; Crosland, Alan  | William C. McGann  | tt0027428 |
| 1746514430 | 1914 | 1914 | The Toll of Love                  | The Toll of Love                  | Faust, Martin                    | Martin Faust       | tt0004710 |
| 1769974341 | 1916 | 1916 | The Missing Mummy                 | The Missing Mummy                 |                                  | William Beaudine   | tt0809194 |
| 1746569531 | 1954 | 1954 | Girl Gang                         | Girl Gang                         | Derteno, Robert C.               | Robert C. Dertano  | tt0171344 |
| 1746492452 | 1947 | 1947 | Tarzan and the Huntress           | Tarzan and the Huntress           | Neumann, Kurt                    | Kurt Neumann       | tt0039887 |
| 1746503667 | 1918 | 1918 | The City of Purple Dreams         | The City of Purple Dreams         | Campbell, Colin                  | Colin Campbell     | tt0008963 |
| 1745309571 | 2006 | 2006 | Lucky Number Slevin               | Lucky Number Slevin               | McGuigan, Paul                   | Paul McGuigan      | tt0425210 |
| 1746438192 | 1943 | 1943 | Boss of Rawhide                   | Boss of Rawhide                   | Clifton, Elmer                   | Elmer Clifton      | tt0036664 |
| 1746218089 | 1966 | 1966 | The Swinger                       | The Swinger                       | Sidney, George                   | George Sidney      | tt0061052 |
| 1746585427 | 1939 | 1939 | Tail Spin                         | Tail Spin                         | Del Ruth, Roy                    | Roy Del Ruth       | tt0032004 |
| 1746500016 | 1924 | 1924 | Broadway or Bust                  | Broadway or Bust                  | Sedgwick, Edward                 | Edward Sedgwick    | tt0014745 |
| 1745293705 | 2005 | 2005 | Doom                              | Doom                              | Bartkowiak, Andrzej              | Andrzej Bartkowiak | tt0419706 |
| 1745340096 | 2004 | 2004 | Imaginary Heroes                  | Imaginary Heroes                  | Harris, Dan                      | Dan Harris         | tt0373024 |
| 1746574247 | 1959 | 1959 | Blue Denim                        | Blue Denim                        | Dunne, Philip                    | Philip Dunne       | tt0052639 |
| 1745341470 | 2010 | 2010 | The Virginity Hit                 | The Virginity Hit                 | Gurland, Andrew; Botko, Huck     | Huck Botko         | tt1695994 |
| 1745302906 | 2006 | 2006 | Peaceful Warrior                  | Peaceful Warrior                  | Salva, Victor                    | Victor Salva       | tt0438315 |
| 1746507757 | 1925 | 1925 | Little Annie Rooney               | Little Annie Rooney               | Beaudine, William                | William Beaudine   | tt0016028 |
| 1746577213 | 1960 | 1960 | The Time Machine                  | The Time Machine                  | Pal, George                      | George Pal         | tt0054387 |
| 1746424239 | 1943 | 1943 | Arizona Trail                     | Arizona Trail                     | Keays, Vernon                    | Vernon Keays       | tt0035647 |
| 1746583383 | 1951 | 1951 | Ma and Pa Kettle Back on the Farm | Ma and Pa Kettle Back on the Farm | Sedgwick, Edward                 | Edward Sedgwick    | tt0043767 |
| 1746574196 | 1963 | 1963 | Who's Been Sleeping in My Bed?    | Who's Been Sleeping in My Bed?    | Mann, Daniel                     | Daniel Mann        | tt0057682 |
| 1746493864 | 1914 | 1914 | One of Millions                   | One of Millions                   | Dawley, J. Searle                | J. Searle Dawley   | tt0004432 |
| 1746501680 | 1916 | 1916 | The Ruse                          | The Ruse                          | Mullin, Eugene                   | Eugene Mullin      | tt0496154 |
| 1746453508 | 1944 | 1943 | Three Russian Girls               | Three Russian Girls               | Ozep, Fedor; Kesler, Henry       | Henry S. Kesler    | tt0037374 |
| 1746583175 | 1939 | 1939 | Nancy Drew... Trouble Shooter     | Nancy Drew... Trouble Shooter     | Clemens, William                 | William Clemens    | tt0031710 |
| 1746508690 | 1950 | 1950 | Blues Busters                     | Blues Busters                     | Beaudine, William                | William Beaudine   | tt0042266 |
| 1746564226 | 1953 | 1953 | Back to God's Country             | Back to God's Country             | Pevney, Joseph                   | Joseph Pevney      | tt0045531 |
| 1746565899 | 1953 | 1953 | The Lady Wants Mink               | The Lady Wants Mink               | Seiter, William A.               | William A. Seiter  | tt0045982 |
| 1746422932 | 1999 | 1999 | Oxygen                            | Oxygen                            | Shepard, Richard                 | Richard Shepard    | tt0160620 |
| 1746582883 | 1937 | 1937 | Fair Warning                      | Fair Warning                      | Foster, Norman                   | Norman Foster      | tt0028846 |
| 1746217651 | 1967 | 1967 | In the Country                    | In the Country                    | Kramer, Robert                   | Robert Kramer      | tt0226821 |
| 1746524265 | 1923 | 1923 | The Victor                        | The Victor                        | Laemmle, Edward                  | Edward Laemmle     | tt0014578 |
| 1746560724 | 1932 | 1932 | Man Wanted                        | Man Wanted                        | Dieterle, William                | William Dieterle   | tt0023180 |
| 1746219698 | 1974 | 1974 | Truck Turner                      | Truck Turner                      | Kaplan, Jonathan                 | Jonathan Kaplan    | tt0072325 |
| 1746577667 | 1936 | 1936 | Aces and Eights                   | Aces and Eights                   | Newfield, Sam                    | Sam Newfield       | tt0027255 |
| 1746560062 | 1964 | 1964 | Man's Favorite Sport?             | Man's Favorite Sport?             | Hawks, Howard                    | Howard Hawks       | tt0058324 |
| 1746211056 | 1973 | 1973 | High Plains Drifter               | High Plains Drifter               | Eastwood, Clint                  | Clint Eastwood     | tt0068699 |
| 1746574445 | 1959 | 1959 | Ben-Hur                           | Ben Hur                           | Wyler, William                   | William Wyler      | tt0052618 |
| 1746198135 | 1967 | 1967 | A Midsummer Night's Dream         | A Midsummer Night's Dream         | Eriksen, Dan                     | George Balanchine  | tt0060694 |
| 1746566247 | 1958 | 1958 | The Narcotics Story               | The Narcotics Story               | Larsen, Robert W.                | Robert W. Larsen   | tt0051981 |
| 1746501382 | 1915 | 1915 | The Wild Olive                    | The Wild Olive                    | Apfel, Oscar                     | Oscar Apfel        | tt0006290 |
| 1746573755 | 1958 | 1958 | The Fearmakers                    | The Fearmakers                    | Tourneur, Jacques                | Jacques Tourneur   | tt0051605 |
| 1746570973 | 1934 | 1934 | Little Miss Marker                | Little Miss Marker                | Hall, Alexander                  | Alexander Hall     | tt0025410 |
| 1746436538 | 1943 | 1943 | Harvest Melody                    | Harvest Melody                    | Newfield, Sam                    | Sam Newfield       | tt0035972 |
| 1746436202 | 1991 | 1991 | Mystery Date                      | Mystery Date                      | Wacks, Jonathan                  | Jonathan Wacks     | tt0102500 |
| 1745340793 | 2003 | 2002 | Horns and Halos                   | Horns and Halos                   | Hawley, Suki ; Galinsky, Michael | Michael Galinsky   | tt0319514 |
| 1746248818 | 1973 | 1973 | The Paper Chase                   | The Paper Chase                   | Bridges, James                   | James Bridges      | tt0070509 |
| 1746453934 | 1999 | 1999 | Double Jeopardy                   | Double Jeopardy                   | Beresford, Bruce                 | Bruce Beresford    | tt0150377 |
| 1746210289 | 1971 | 1971 | They Might Be Giants              | They Might Be Giants              | Harvey, Anthony                  | Anthony Harvey     | tt0067848 |
| 1746422254 | 1989 | 1989 | Fear, Anxiety and Depression      | Fear, Anxiety & Depression        | Solondz, Todd                    | Todd Solondz       | tt0169895 |
| 1745342031 | 2001 | 2000 | Diamond Men                       | Diamond Men                       | Cohen, Daniel M.                 | Dan Cohen          | tt0200427 |
| 1746520636 | 1925 | 1925 | The Fighting Smile                | The Fighting Smile                | Marchant, Jay                    | Jay Marchant       | tt0015814 |
| 1746210621 | 1973 | 1973 | Godspell                          | Godspell                          | Greene, David                    | David Greene       | tt0070121 |
| 1746524904 | 1915 | 1915 | Business Is Business              | Business Is Business              | Turner, Otis                     | Otis Turner        | tt0005039 |
| 1746574849 | 1933 | 1933 | Aggie Appleby, Maker of Men       | Aggie Appleby, Maker of Men       | Sandrich, Mark                   | Mark Sandrich      | tt0023744 |

|            |      |      |                                       |                                       |                                  |                      |           |
|------------|------|------|---------------------------------------|---------------------------------------|----------------------------------|----------------------|-----------|
| 1746582628 | 1937 | 1937 | The Woman I Love                      | The Woman I Love                      | Litvak, Anatole                  | Anatole Litvak       | tt0029790 |
| 1746520890 | 1949 | 1949 | Death Valley Gunfighter               | Death Valley Gunfighter               | Springsteen, R. G.               | R.G. Springsteen     | tt0041287 |
| 1746566919 | 1952 | 1952 | For Men Only                          | For Men Only                          | Henreid, Paul                    | Paul Henreid         | tt0044628 |
| 1746436930 | 1997 | 1997 | Beverly Hills Ninja                   | Beverly Hills Ninja                   | Dugan, Dennis                    | Dennis Dugan         | tt0118708 |
| 1746234185 | 1968 | 1968 | Bandolero!                            | Bandolero!                            | McLaglen, Andrew V.              | Andrew V. McLaglen   | tt0062708 |
| 1746585334 | 1929 | 1929 | The Canary Murder Case                | The Canary Murder Case                | St. Clair, Malcolm               | Malcolm St. Clair    | tt0019745 |
| 1746500351 | 1924 | 1924 | Flaming Barriers                      | Flaming Barriers                      | Melford, George                  | George Melford       | tt0014906 |
| 1746581965 | 1928 | 1928 | Cheyenne Trails                       | Cheyenne Trails                       | Horner, Robert J.                | Robert J. Horner     | tt0169307 |
| 1746581243 | 1910 | 1910 | The Irony of Fate                     | The Irony of Fate                     |                                  | Harry Solter         | tt0200741 |
| 1746421068 | 2000 | 1999 | The Big Tease                         | The Big Tease                         | Allen, Kevin                     | Kevin Allen          | tt0156639 |
| 1746532721 | 1927 | 1927 | Woman's Law                           | Woman's Law                           | Fitzgerald, Dallas M.            | Dallas M. Fitzgerald | tt0018593 |
| 1746574574 | 1936 | 1936 | Two-Fisted Gentleman                  | Two Fisted Gentleman                  | Wiles, Gordon                    | Gordon Wiles         | tt0028435 |
| 1746507599 | 1950 | 1950 | Annie Get Your Gun                    | Annie Get Your Gun                    | Sidney, George                   | George Sidney        | tt0042200 |
| 1746186320 | 1968 | 1968 | Funny Girl                            | Funny Girl                            | Wyler, William                   | William Wyler        | tt0062994 |
| 1769971109 | 1969 | 1969 | Back Seat Cabbie                      | Back Seat Cabbie                      | Walsh, C.                        | C. Walsh             | tt0211207 |
| 1746577554 | 1937 | 1937 | The Spanish Earth                     | The Spanish Earth                     |                                  | Joris Ivens          | tt0029594 |
| 1746394695 | 1989 | 1989 | Teen Witch                            | Teen Witch                            | Walker, Dorian                   | Dorian Walker        | tt0098453 |
| 1746454340 | 1996 | 1996 | Bio-Dome                              | Bio Dome                              | Bloom, Jason                     | Jason Bloom          | tt0115683 |
| 1746514374 | 1916 | 1916 | Souls in Bondage                      | Souls in Bondage                      | Lewis, Edgar                     | Edgar Lewis          | tt0158982 |
| 1745342325 | 2003 | 2003 | The League of Extraordinary Gentlemen | The League of Extraordinary Gentlemen | Norrington, Stephen              | Stephen Norrington   | tt0311429 |
| 1746495855 | 1918 | 1918 | Hands Down                            | Hands Down                            | Julian, Rupert                   | Rupert Julian        | tt0009139 |
| 1746577798 | 1933 | 1933 | Three Cornered Moon                   | Three Cornered Moon                   | Nugent, Elliott                  | Elliott Nugent       | tt0024664 |
| 1746583281 | 1951 | 1951 | Skipalong Rosenbloom                  | Skipalong Rosenbloom                  | Newfield, Sam                    | Sam Newfield         | tt0044043 |
| 1746210843 | 1971 | 1971 | Two-Lane Blacktop                     | Two Lane Blacktop                     | Hellman, Monte                   | Monte Hellman        | tt0067893 |
| 1746491811 | 1945 | 1945 | What a Blonde                         | What a Blonde                         | Goodwins, Leslie                 | Leslie Goodwins      | tt0038244 |
| 1746508929 | 1924 | 1924 | Tess of the D'Urbervilles             | Tess of the D'Urbervilles             | Neilan, Marshall                 | Marshall Neilan      | tt0015394 |
| 1746258217 | 1979 | 1978 | Night Creature                        | Night Creature                        | Madden, Lee                      | Lee Madden           | tt0079626 |
| 1746209375 | 1968 | 1968 | Rachel, Rachel                        | Rachel, Rachel                        | Newman, Paul                     | Paul Newman          | tt0063483 |
| 1746508539 | 1925 | 1925 | The Lure of the Track                 | Lure of the Track                     |                                  | J.P. McGowan         | tt0016055 |
| 1746465251 | 1942 | 1942 | Man from Headquarters                 | Man from Headquarters                 | Yarbrough, Jean                  | Jean Yarbrough       | tt0035028 |
| 1746533195 | 1923 | 1923 | Where the North Begins                | Where the North Begins                | Franklin, Chester M.             | Chester M. Franklin  | tt0014600 |
| 1746580658 | 1935 | 1936 | Man's Best Friend                     | Man's Best Friend                     | Kull, Edward                     | Edward A. Kull       | tt0151480 |
| 1746569656 | 1958 | 1958 | The High Cost of Loving               | The High Cost of Loving               | Ferrer, José                     | José Ferrer          | tt0051721 |
| 1746501626 | 1916 | 1916 | A Bath Tub Mystery                    | A Bath Tub Mystery                    | McKim, Edwin                     | Edwin McKim          | tt0204159 |
| 1746234040 | 1968 | 1968 | Faces                                 | Faces                                 | Cassavetes, John                 | John Cassavetes      | tt0062952 |
| 1746435537 | 1940 | 1940 | The Saint's Double Trouble            | The Saint's Double Trouble            | Hively, Jack                     | Jack Hively          | tt0033014 |
| 1746576298 | 1931 | 1931 | A Dangerous Affair                    | A Dangerous Affair                    | Sedgwick, Edward                 | Edward Sedgwick      | tt0020808 |
| 1745342532 | 2009 | 2009 | The Goods: Live Hard, Sell Hard       | The Goods: Live Hard, Sell Hard       | Brennan, Neal                    | Neal Brennan         | tt1092633 |
| 1746581967 | 1951 | 1951 | Stop That Cab                         | Stop That Cab                         | Liguoro, Eugenio de              | Eugenio de Liguoro   | tt0044074 |
| 1746514094 | 1927 | 1927 | Beware of Widows                      | Beware of Widows                      | Ruggles, Wesley                  | Wesley Ruggles       | tt0017672 |
| 1746533220 | 1915 | 1915 | The Making over of Geoffrey Manning   | The Making Over of Geoffrey Manning   | Davenport, Harry                 | Harry Davenport      | tt0005690 |
| 1746573735 | 1958 | 1958 | King Creole                           | King Creole                           | Curtiz, Michael                  | Michael Curtiz       | tt0051818 |
| 1746571317 | 1934 | 1934 | Elmer and Elsie                       | Elmer and Elsie                       | Pratt, Gilbert                   | Gilbert Pratt        | tt0025080 |
| 1746209303 | 1968 | 1967 | Women of Desire                       | Women of Desire                       | Sinclair, Vincent L.             | Vincent L. Sinclair  | tt0261425 |
| 1746577762 | 1935 | 1935 | The Last Outpost                      | The Last Outpost                      | Gasnier, Louis; Barton, Charles  | Charles Barton       | tt0026607 |
| 1769970484 | 1967 | 1967 | Infidelity American Style             | Infidelity American Style             | Johnsen, S. N.                   | Sande N. Johnsen     | tt0137837 |
| 1746577230 | 1959 | 1959 | Beast from Haunted Cave               | Beast from Haunted Cave               | Hellman, Monte                   | Monte Hellman        | tt0052609 |
| 1746525136 | 1921 | 1921 | One a Minute                          | One a Minute                          | Nelson, Jack                     | Jack Nelson          | tt0012529 |
| 1746581577 | 1928 | 1928 | Ranger's Oath                         | Ranger's Oath                         | Horner, Robert J.                | Robert J. Horner     | tt0019306 |
| 1746574726 | 1936 | 1936 | Big Brown Eyes                        | Big Brown Eyes                        | Walsh, Raoul                     | Raoul Walsh          | tt0027357 |
| 1746583247 | 1928 | 1928 | The Chorus Kid                        | The Chorus Kid                        | Bretherton, Howard               | Howard Bretherton    | tt0018769 |
| 1769971093 | 1969 | 1969 | Two Roses and a Golden-Rod            | Two Roses and a Golden Rod            | Zugsmith, Albert                 | Albert Zugsmith      | tt0065135 |
| 1746487846 | 1920 | 1920 | Go and Get It                         | Go and Get It                         | Neilan, Marshall; Symonds, Henry | Marshall Neilan      | tt0011234 |
| 1746580635 | 1938 | 1938 | Doctor Rhythm                         | Doctor Rhythm                         | Tuttle, Frank                    | Frank Tuttle         | tt0030078 |
| 1746508209 | 1926 | 1926 | Law or Loyalty                        | Law or Loyalty                        | Harris, Lawson                   | Lawson Harris        | tt0405091 |
| 1746523291 | 1914 | 1914 | The Strange Story of Sylvia Gray      | The Strange Story of Sylvia Gray      | Gaskill, Charles L.              | Charles L. Gaskill   | tt0004643 |
| 1746524103 | 1923 | 1923 | Prodigal Daughters                    | Prodigal Daughters                    | Wood, Sam                        | Sam Wood             | tt0014379 |

|            |      |      |                                              |                                              |                                    |                      |           |
|------------|------|------|----------------------------------------------|----------------------------------------------|------------------------------------|----------------------|-----------|
| 1746235410 | 1972 | 1972 | The Godfather                                | The Godfather                                | Coppola, Francis Ford              | Francis Ford Coppola | tt0068646 |
| 1746580744 | 1938 | 1938 | The Shopworn Angel                           | The Shopworn Angel                           | Potter, H. C.                      | H. C. Potter         | tt0030744 |
| 1746257715 | 1980 | 1980 | Nijinsky                                     | Nijinsky                                     | Ross, Herbert                      | Herbert Ross         | tt0081235 |
| 1746583902 | 1930 | 1930 | A Notorious Affair                           | A Notorious Affair                           | Bacon, Lloyd                       | Lloyd Bacon          | tt0021191 |
| 1746421309 | 1993 | 1993 | The Vanishing                                | The Vanishing                                | Sluizer, George                    | George Sluizer       | tt0108473 |
| 1746574185 | 1956 | 1956 | He Laughed Last                              | He Laughed Last                              | Edwards, Blake                     | Blake Edwards        | tt0049294 |
| 1746464872 | 1941 | 1941 | No Greater Sin                               | No Greater Sin                               | Nigh, William                      | William Nigh         | tt0033957 |
| 1746520857 | 1949 | 1949 | Grand Canyon                                 | Grand Canyon                                 | Landres, Paul                      | Paul Landres         | tt0041424 |
| 1746484415 | 1918 | 1918 | Out of the Night                             | Out of the Night                             | Kirkwood, James                    | James Kirkwood       | tt0009468 |
| 1746250534 | 1976 | 1976 | Welcome to L. A.                             | Welcome to L.A.                              | Rudolph, Alan                      | Alan Rudolph         | tt0076910 |
| 1746580459 | 1938 | 1938 | A Man to Remember                            | A Man to Remember                            | Kanin, Garson                      | Garson Kanin         | tt0030410 |
| 1769970103 | 1912 | 1912 | Stolen Glory                                 | Stolen Glory                                 | Sennett, Mack                      | Mack Sennett         | tt0002506 |
| 1746578862 | 1961 | 1961 | Splendor in the Grass                        | Splendor in the Grass                        | Kazan, Elia                        | Elia Kazan           | tt0055471 |
| 1746454696 | 1946 | 1946 | In Old Sacramento                            | In Old Sacramento                            | Kane, Joseph                       | Joseph Kane          | tt0038637 |
| 1746524803 | 1916 | 1916 | When Love Is King                            | When Love Is King                            | Turbett, Ben                       | Ben Turbett          | tt0159124 |
| 1746454977 | 1999 | 1999 | Any Given Sunday                             | Any Given Sunday                             | Stone, Oliver                      | Oliver Stone         | tt0146838 |
| 1746571344 | 1952 | 1952 | Gold Fever                                   | Gold Fever                                   | Goodwins, Leslie                   | Leslie Goodwins      | tt0044669 |
| 1746474986 | 1947 | 1947 | Prairie Express                              | Prairie Express                              | Hillyer, Lambert                   | Lambert Hillyer      | tt0039727 |
| 1746497495 | 1919 | 1919 | A Dangerous Affair                           | A Dangerous Affair                           | Miller, Charles                    | Charles Miller       | tt0190347 |
| 1746500101 | 1949 | 1949 | The Lost Tribe                               | The Lost Tribe                               | Berke, William                     | William Berke        | tt0041602 |
| 1746491956 | 1946 | 1946 | Step by Step                                 | Step by Step                                 | Rosen, Phil                        | Phil Rosen           | tt0038982 |
| 1746585184 | 1928 | 1928 | Chicago After Midnight                       | Chicago After Midnight                       | Ince, Ralph                        | Ralph Ince           | tt0018763 |
| 1746408475 | 1986 | 1986 | Touch and Go                                 | Touch and Go                                 | Mandel, Robert                     | Robert Mandel        | tt0092104 |
| 1746555893 | 1957 | 1957 | Rock All Night                               | Rock All Night                               | Corman, Roger                      | Roger Corman         | tt0050906 |
| 1746208550 | 1965 | 1965 | Thunderball                                  | Thunderball                                  | Young, Terence; Browning, Ricou    | Terence Young        | tt0059800 |
| 1746524681 | 1910 | 1910 | An Old Story with a New Ending               | An Old Story with a New Ending               | Powell, Frank                      | Frank Powell         | tt0001344 |
| 1746574877 | 1937 | 1937 | Thanks for Listening                         | Thanks for Listening                         | Neilan, Marshall                   | Marshall Neilan      | tt0029649 |
| 1746583025 | 1940 | 1940 | Dr. Kildare's Strange Case                   | Dr. Kildare's Strange Case                   | Bucquet, Harold S.                 | Harold S. Bucquet    | tt0032416 |
| 1746574569 | 1935 | 1935 | Moonlight on the Prairie                     | Moonlight on the Prairie                     | Lederman, D. Ross                  | D. Ross Lederman     | tt0027981 |
| 1745359253 | 2004 | 2004 | Napoleon Dynamite                            | Napoleon Dynamite                            | Hess, Jared                        | Jared Hess           | tt0374900 |
| 1746500545 | 1924 | 1924 | Cupid's Rustler                              | Cupid's Rustler                              | Ford, Francis                      | Francis Ford         | tt0014810 |
| 1745342452 | 2003 | 2003 | Charlie: The Life and Art of Charles Chaplin | Charlie: The Life and Art of Charles Chaplin | Schickel, Richard                  | Richard Schickel     | tt0379730 |
| 1746584144 | 1936 | 1936 | Go West Young Man                            | Go West Young Man                            | Hathaway, Henry                    | Henry Hathaway       | tt0027684 |
| 1746520677 | 1925 | 1925 | The Sporting Venus                           | The Sporting Venus                           | Neilan, Marshall                   | Marshall Neilan      | tt0016390 |
| 1746524574 | 1927 | 1927 | Burning Gold                                 | Burning Gold                                 | Noble, Jack                        | John W. Noble        | tt0017718 |
| 1746574666 | 1937 | 1937 | Night Club Scandal                           | Night Club Scandal                           | Murphy, Ralph                      | Ralph Murphy         | tt0029308 |
| 1746464838 | 1942 | 1942 | The Lone Star Ranger                         | Lone Star Ranger                             | Tinling, James                     | James Tinling        | tt0034994 |
| 1746503899 | 1919 | 1919 | It Happened in Paris                         | It Happened in Paris                         | Hartford, David                    | David Hartford       | tt0190486 |
| 1746580684 | 1938 | 1938 | The Girl of the Golden West                  | The Girl of the Golden West                  | Leonard, Robert Z.                 | Robert Z. Leonard    | tt0030182 |
| 1746435711 | 1943 | 1943 | Report from the Aleutians                    | Report from the Aleutians                    | Huston, John                       | John Huston          | tt0036301 |
| 1746393453 | 1987 | 1987 | Evil Dead II                                 | Evil Dead II                                 | Raimi, Sam                         | Sam Raimi            | tt0092991 |
| 1746577852 | 1936 | 1936 | Stage Struck                                 | Stage Struck                                 | Berkeley, Busby                    | Busby Berkeley       | tt0028305 |
| 1746567931 | 1933 | 1933 | Breed of the Border                          | Breed of the Border                          | Bradbury, Robert N.                | Robert N. Bradbury   | tt0023839 |
| 1746440124 | 1996 | 1995 | Screamers                                    | Screamers                                    | Duguay, Christian                  | Christian Duguay     | tt0114367 |
| 1746454395 | 1944 | 1944 | The Cowboy and the Senorita                  | Cowboy and the Senorita                      | Kane, Joseph                       | Joseph Kane          | tt0036725 |
| 1746525057 | 1919 | 1919 | Upside Down                                  | Upside Down                                  | Windom, Lawrence C.                | Lawrence C. Windom   | tt0194495 |
| 1746491793 | 1944 | 1944 | Greenwich Village                            | Greenwich Village                            | Lang, Walter                       | Walter Lang          | tt0036881 |
| 1746516059 | 1920 | 1920 | The Green Flame                              | The Green Flame                              | Warde, Ernest C.                   | Ernest C. Warde      | tt0011251 |
| 1746393197 | 1984 | 1984 | Tightrope                                    | Tightrope                                    | Tuggle, Richard                    | Richard Tuggle       | tt0088272 |
| 1746581700 | 1928 | 1928 | The Pioneer Scout                            | Pioneer Scout                                | Ingraham, Lloyd; Werker, Alfred L. | Lloyd Ingraham       | tt0019276 |
| 1746514680 | 1910 | 1910 | The Comet                                    | The Comet                                    |                                    |                      | tt0270285 |
| 1746208143 | 1969 | 1969 | Joniko and the Kush Ta Ka                    | Joniko and the Kush Ta Ka                    | Beebe, Ford                        | Ford Beebe Jr.       | tt0122121 |
| 1746563885 | 1952 | 1952 | Sudden Fear                                  | Sudden Fear                                  | Miller, David                      | David Miller         | tt0045205 |
| 1746567938 | 1933 | 1933 | Soldiers of the Storm                        | Soldiers of the Storm                        | Lederman, D. Ross                  | D. Ross Lederman     | tt0164901 |
| 1746508977 | 1925 | 1925 | The Great Jewel Robbery                      | The Great Jewel Robbery                      | Ince, John                         | John Ince            | tt0015877 |
| 1746583661 | 1931 | 1931 | Sooky                                        | Sooky                                        | Taurog, Norman                     | Norman Taurog        | tt0022414 |
| 1746437335 | 1943 | 1943 | Hi, Buddy                                    | Hi, Buddy                                    | Young, Harold                      | Harold Young         | tt0035998 |

|                   |             |             |                                       |                                       |                                  |                        |                  |
|-------------------|-------------|-------------|---------------------------------------|---------------------------------------|----------------------------------|------------------------|------------------|
| 1746198274        | 1966        | 1966        | Way Out                               | Way Out                               | Yeaworth, Irvin S.               | Irvin S. Yeaworth Jr.  | tt0062478        |
| 1746433759        | 2000        | 2000        | Beautiful                             | Beautiful                             | Field, Sally                     | Sally Field            | tt0210567        |
| 1746235925        | 1974        | 1974        | The Teacher                           | The Teacher                           | Avedis, Hikmet                   | Howard Avedis          | tt0072260        |
| 1746514719        | 1913        | 1913        | Mexican War Pictures                  | Mexican War Pictures                  |                                  |                        | tt0003139        |
| 1746570405        | 1933        | 1933        | East of Fifth Avenue                  | East of Fifth Avenue                  | Rogell, Albert                   | Albert S. Rogell       | tt0023975        |
| 1746394464        | 1985        | 1985        | The Beach Boys: An American Band      | The Beach Boys: An American Band      | Leo, Malcolm                     | Malcolm Leo            | tt0175471        |
| 1746508083        | 1926        | 1926        | Riding Rivals                         | Ridin' Rivals                         | Thorpe, Richard                  | Richard Thorpe         | tt0173127        |
| 1746249392        | 1975        | 1975        | Farewell, My Lovely                   | Farewell, My Lovely                   | Richards, Dick                   | Dick Richards          | tt0072973        |
| 1746578511        | 1950        | 1950        | Two Flags West                        | Two Flags West                        | Wise, Robert                     | Robert Wise            | tt0043079        |
| 1746497001        | 1918        | 1918        | Opportunity                           | Opportunity                           | Collins, John H.                 | John H. Collins        | tt0009454        |
| 1746520270        | 1925        | 1925        | Stop Flirting                         | Stop Flirting                         | Sidney, Scott                    | Scott Sidney           | tt0016398        |
| 1746574160        | 1956        | 1956        | War and Peace                         | War and Peace                         | Vidor, King                      | King Vidor             | tt0049934        |
| 1746555234        | 1957        | 1956        | The Great Man                         | The Great Man                         | Ferrer, José                     | José Ferrer            | tt0049280        |
| 1746578927        | 1961        | 1961        | Goodbye Again                         | Goodbye Again                         | Litvak, Anatole                  | Anatole Litvak         | tt0054936        |
| 1746475501        | 1948        | 1948        | Hazard                                | Hazard                                | Marshall, George                 | George Marshall        | tt0040426        |
| 1746504732        | 1918        | 1918        | Her Body in Bond                      | Her Body in Bond                      | Leonard, Robert                  | Robert Z. Leonard      | tt0009159        |
| 1746512880        | 1916        | 1916        | The Traffic Cop                       | The Traffic Cop                       | Mitchell, Howard M.              | Howard M. Mitchell     | tt0159044        |
| 1746504220        | 1919        | 1919        | The Light of Victory                  | The Light of Victory                  | Wolbert, William                 | William Wolbert        | tt0010354        |
| 1746249727        | 1979        | 1979        | Apocalypse Now                        | Apocalypse Now                        | Coppola, Francis                 | Francis Ford Coppola   | tt0078788        |
| 1746574134        | 1960        | 1960        | Private Property                      | Private Property                      | Stevens, Leslie                  | Leslie Stevens         | tt0054209        |
| 1746524771        | 1910        | 1910        | The Padre's Secret                    | The Padre's Secret                    |                                  | William F. Haddock     | tt0001352        |
| 1746582949        | 1936        | 1936        | Millionaire Kid                       | The Millionaire Kid                   | Ray, Bernard B.                  | Bernard B. Ray         | tt0027970        |
| <b>1746473774</b> | <b>1947</b> | <b>1947</b> | <b>The Red Stallion</b>               | <b>The Red Stallion</b>               | <b>Selander, Lesley</b>          | <b>Lesley Selander</b> | <b>tt0039758</b> |
| 1746580863        | 1936        | 1936        | We Went to College                    | We Went to College                    | Santley, Joseph                  | Joseph Santley         | tt0028483        |
| 1746420965        | 1992        | 1992        | Trespass                              | Trespass                              | Hill, Walter                     | Walter Hill            | tt0105636        |
| 1746394189        | 1991        | 1991        | True Colors                           | True Colors                           | Ross, Herbert                    | Herbert Ross           | tt0103125        |
| 1746486468        | 1919        | 1919        | When the Clouds Roll by               | When the Clouds Roll by               | Fleming, Victor                  | Victor Fleming         | tt0010879        |
| 1746474094        | 1946        | 1946        | Cuban Pete                            | Cuban Pete                            | Yarbrough, Jean                  | Jean Yarbrough         | tt0038441        |
| 1745342843        | 2009        | 2009        | Crazy Heart                           | Crazy Heart                           | Cooper, Scott                    | Scott Cooper           | tt1263670        |
| 1746582965        | 1937        | 1937        | Windjammer                            | Windjammer                            | Scott, Ewing                     | Ewing Scott            | tt0128844        |
| 1746574422        | 1960        | 1960        | Jungle Cat                            | Jungle Cat                            | Algar, James                     | James Algar            | tt0053977        |
| 1746514417        | 1927        | 1927        | Her Wild Oat                          | Her Wild Oat                          | Neilan, Marshall                 | Marshall Neilan        | tt0018993        |
| 1746580675        | 1934        | 1934        | Cheating Cheaters                     | Cheating Cheaters                     | Thorpe, Richard                  | Richard Thorpe         | tt0024972        |
| 1746583289        | 1930        | 1930        | Liliom                                | Liliom                                | Borzage, Frank                   | Frank Borzage          | tt0021074        |
| 1746554966        | 1963        | 1963        | Nine Hours to Rama                    | Nine Hours to Rama                    | Robson, Mark                     | Mark Robson            | tt0057362        |
| 1746524499        | 1916        | 1916        | The Little School Ma'am               | The Little School Ma'am               | Franklin, C. M.; Franklin, S. A. | Chester M. Franklin    | tt0138576        |
| 1746502228        | 1916        | 1916        | David Garrick                         | David Garrick                         | Lloyd, Frank                     | Frank Lloyd            | tt0006569        |
| 1746495622        | 1919        | 1919        | Jacques of the Silver North           | Jacques of the Silver North           | MacGregor, Norval                | Norval MacGregor       | tt0213011        |
| 1746565950        | 1956        | 1956        | Female Jungle                         | Female Jungle                         | Ve Sota, Bruno                   | Bruno VeSota           | tt0049204        |
| 1746567017        | 1933        | 1933        | King of the Arena                     | King of the Arena                     | James, Alan                      | Alan James             | tt0024218        |
| 1746507773        | 1949        | 1949        | Tuna Clipper                          | Tuna Clipper                          | Beaudine, William                | William Beaudine       | tt0041995        |
| 1745358983        | 2008        | 2008        | Meet the Spartans                     | Meet the Spartans                     | Friedberg, Jason; Seltzer, Aaron | Jason Friedberg        | tt1073498        |
| 1745373754        | 2004        | 2004        | Eternal Sunshine of the Spotless Mind | Eternal Sunshine of the Spotless Mind | Gondry, Michel                   | Michel Gondry          | tt0338013        |
| 1745358914        | 2009        | 2009        | Women in Trouble                      | Women in Trouble                      | Gutierrez, Sebastian             | Sebastian Gutierrez    | tt1247704        |
| 1746578783        | 1960        | 1960        | Midnight Lace                         | Midnight Lace                         | Miller, David                    | David Miller           | tt0054084        |
| 1746422131        | 1993        | 1992        | Sidekicks                             | Sidekicks                             | Norris, Aaron                    | Aaron Norris           | tt0105402        |
| 1746423367        | 1996        | 1996        | The Preacher's Wife                   | The Preacher's Wife                   | Marshall, Penny                  | Penny Marshall         | tt0117372        |
| 1746585232        | 1929        | 1929        | Drag                                  | Drag                                  | Lloyd, Frank                     | Frank Lloyd            | tt0019833        |
| 1746575032        | 1933        | 1933        | The Pharmacist                        | The Pharmacist                        | Ripley, Arthur                   | Arthur Ripley          | tt0024446        |
| 1746485554        | 1919        | 1919        | Where the West Begins                 | Where the West Begins                 | King, Henry                      | Henry King             | tt0010881        |
| 1745375196        | 2008        | 2008        | Cover                                 | Cover                                 | Duke, Bill                       | Frank T. Ziede         | tt1357111        |
| 1746565912        | 1953        | 1953        | Man in the Dark                       | Man in the Dark                       | Landers, Lew                     | Lew Landers            | tt0046036        |
| 1746504731        | 1922        | 1922        | Paid Back                             | Paid Back                             | Cummings, Irving                 | Irving Cummings        | tt0013478        |
| 1746504533        | 1918        | 1918        | The Prodigal Wife                     | The Prodigal Wife                     | Reicher, Frank                   | Frank Reicher          | tt0009521        |
| 1746419155        | 1983        | 1983        | Stroker Ace                           | Stroker Ace                           | Needham, Hal                     | Hal Needham            | tt0086379        |
| 1746520861        | 1925        | 1925        | Riders of Mystery                     | Riders of Mystery                     | Bradbury, Robert North           | Robert N. Bradbury     | tt0016287        |
| 1746500711        | 1924        | 1924        | Westbound                             | Westbound                             |                                  |                        | tt0177378        |

|            |      |      |                                      |                                      |                                   |                                     |           |
|------------|------|------|--------------------------------------|--------------------------------------|-----------------------------------|-------------------------------------|-----------|
| 1746465080 | 1947 | 1947 | Body and Soul                        | Body and Soul                        | Rossen, Robert                    | Robert Rossen                       | tt0039204 |
| 1746582551 | 1938 | 1938 | Gangster's Boy                       | Gangster's Boy                       | Nigh, William                     | William Nigh                        | tt0030170 |
| 1746566351 | 1954 | 1954 | Champagne Safari                     | Champagne Safari                     |                                   | Jackson Leighter                    | tt0044493 |
| 1746454452 | 1943 | 1943 | The Crystal Ball                     | The Crystal Ball                     | Nugent, Elliott                   | Elliott Nugent                      | tt0035771 |
| 1746559830 | 1964 | 1963 | The Raiders                          | The Raiders                          | Daugherty, Herschel               | Herschel Daugherty                  | tt0057446 |
| 1769970652 | 1968 | 1968 | All the Sins of Sodom                | All the Sins of Sodom                | Sarno, Joe                        | Joseph W. Sarno                     | tt0061345 |
| 1746575062 | 1935 | 1935 | Ship Cafe                            | Ship Cafe                            | Florey, Robert                    | Robert Florey                       | tt0026987 |
| 1746420547 | 1993 | 1993 | So I Married an Axe Murderer         | So I Married an Axe Murderer         | Schlamme, Thomas                  | Thomas Schlamme                     | tt0108174 |
| 1746467205 | 1917 | 1917 | Daughter of Destiny                  | Daughter of Destiny                  | Irving, George                    | George Irving                       | tt0007840 |
| 1746514888 | 1922 | 1922 | How Women Love                       | How Women Love                       | Webb, Kenneth                     | Kenneth S. Webb                     | tt0013252 |
| 1746580683 | 1939 | 1939 | The Night Riders                     | The Night Riders                     | Sherman, George                   | George Sherman                      | tt0031722 |
| 1746423275 | 1999 | 1999 | The Adventures of Elmo in Grouchland | The Adventures of Elmo in Grouchland | Halvorson, Gary                   | Gary Halvorson                      | tt0159421 |
| 1746502472 | 1916 | 1916 | The Unattainable                     | The Unattainable                     | Carleton, Lloyd B.                | Lloyd B. Carleton                   | tt0007071 |
| 1745374605 | 2009 | 2009 | My Sister's Keeper                   | My Sister's Keeper                   | Cassavetes, Nick                  | Nick Cassavetes                     | tt1078588 |
| 1746585438 | 1940 | 1939 | Paradise in Harlem                   | Paradise in Harlem                   | Seiden, Joseph                    | Joseph Seiden                       | tt0031784 |
| 1746501051 | 1910 | 1910 | A Mountain Wife                      | A Mountain Wife                      |                                   | William F. Haddock                  | tt1084719 |
| 1746584840 | 1930 | 1930 | Alias French Gertie                  | Alias French Gertie                  | Archainbaud, George               | George Archainbaud                  | tt0020628 |
| 1746514572 | 1916 | 1916 | Merely Mary Ann                      | Merely Mary Ann                      | Adolfi, John G.                   | John G. Adolfi                      | tt0007058 |
| 1746554258 | 1964 | 1964 | Hamlet                               | Hamlet                               | Colleran, Bill                    | Bill Colleran                       | tt0058175 |
| 1746393537 | 1986 | 1986 | She's Gotta Have It                  | She's Gotta Have It                  | Lee, Spike                        | Spike Lee                           | tt0091939 |
| 1746577006 | 1963 | 1963 | Lassie's Great Adventure             | Lassie's Great Adventure             | Beaudine, William                 | William Beaudine                    | tt0126993 |
| 1746571789 | 1910 | 1910 | The Count That Counted               | The Count That Counted               |                                   | Gilbert M. 'Broncho Billy' Anderson | tt0372222 |
| 1746423167 | 1940 | 1940 | Island of Doomed Men                 | Island of Doomed Men                 | Barton, Charles                   | Charles Barton                      | tt0032641 |
| 1746496080 | 1919 | 1919 | Forest Rivals                        | Forest Rivals                        | Hoyt, Harry O.                    | Harry O. Hoyt                       | tt0010142 |
| 1746500493 | 1925 | 1925 | The Great Divide                     | The Great Divide                     | Barker, Reginald                  | Reginald Barker                     | tt0015876 |
| 1746574194 | 1958 | 1958 | The Tunnel of Love                   | The Tunnel of Love                   | Kelly, Gene                       | Gene Kelly                          | tt0052325 |
| 1746580516 | 1939 | 1939 | Invisible Stripes                    | Invisible Stripes                    | Bacon, Lloyd                      | Lloyd Bacon                         | tt0032636 |
| 1746571338 | 1933 | 1933 | So This Is Africa                    | So This Is Africa                    | Cline, Edward F.                  | Edward F. Cline                     | tt0024581 |
| 1746520225 | 1925 | 1925 | The Son of Sontag                    | The Son of Sontag                    | Hurst, Paul                       | Paul Hurst                          | tt0165485 |
| 1746571077 | 1935 | 1935 | The Unwelcome Stranger               | The Unwelcome Stranger               | Rosen, Phil                       | Phil Rosen                          | tt0027162 |
| 1746514796 | 1915 | 1915 | The Arrival of Perpetua              | The Arrival of Perpetua              | Chautard, Emil                    | Emile Chautard                      | tt0004911 |
| 1746570312 | 1934 | 1934 | Girl O' My Dreams                    | Girl O' My Dreams                    | McCarey, Raymond                  | Ray McCarey                         | tt0025177 |
| 1746503844 | 1919 | 1919 | A Scream in the Night                | A Scream in the Night                | King, Burton; De Cordova, Leander | Leander De Cordova                  | tt0010670 |
| 1746474497 | 1948 | 1948 | Lightnin' in the Forest              | Lightnin' in the Forest              | Blair, George                     | George Blair                        | tt0040539 |
| 1746502306 | 1915 | 1915 | Comrade John                         | Comrade John                         | Bracken, Bertram                  | Bertram Bracken                     | tt0005128 |
| 1746562404 | 1955 | 1956 | Buxom Beautease                      | Buxom Beautease                      | Klaw, Irving                      | Irving Klaw                         | tt0134398 |
| 1746492470 | 1945 | 1945 | White Pongo                          | White Pongo                          | Newfield, Sam                     | Sam Newfield                        | tt0038246 |
| 1746420904 | 1988 | 1988 | Memories of Me                       | Memories of Me                       | Winkler, Henry                    | Henry Winkler                       | tt0095613 |
| 1746185399 | 1965 | 1964 | 36 Hours                             | 36 Hours                             | Seaton, George                    | George Seaton                       | tt0057809 |
| 1746581858 | 1930 | 1930 | The Bat Whispers                     | The Bat Whispers                     | West, Roland                      | Roland West                         | tt0020668 |
| 1746437600 | 1997 | 1997 | 8 Heads in a Duffel Bag              | 8 Heads in a Duffel Bag              | Schulman, Tom                     | Tom Schulman                        | tt0118541 |
| 1745372638 | 2002 | 2002 | Analyze That                         | Analyze That                         | Ramis, Harold                     | Harold Ramis                        | tt0289848 |
| 1746453669 | 1996 | 1996 | Mission: Impossible                  | Mission: Impossible                  | De Palma, Brian                   | Brian De Palma                      | tt0117060 |
| 1746495724 | 1917 | 1917 | One Law for Both                     | One Law for Both                     | Abramson, Ivan                    | Ivan Abramson                       | tt0008388 |
| 1746584113 | 1935 | 1935 | Escape from Devil's Island           | Escape from Devil's Island           | Rogell, Albert                    | Albert S. Rogell                    | tt0026321 |
| 1746577827 | 1936 | 1936 | Pennies From Heaven                  | Pennies from Heaven                  | McLeod, Norman Z.                 | Norman Z. McLeod                    | tt0028092 |
| 1746570724 | 1934 | 1934 | War Is a Racket                      | War Is a Racket                      |                                   | Jacques A. Koerpel                  | tt0025958 |
| 1746530779 | 1949 | 1949 | Bomba on Panther Island              | Bomba on Panther Island              | Beebe, Ford                       | Ford Beebe                          | tt0041195 |
| 1746573977 | 1963 | 1963 | Knockers Up                          | Knockers Up                          | Gaylord, A. J.                    | Peter Perry Jr.                     | tt0173961 |
| 1746508048 | 1925 | 1925 | The Shining Adventure                | The Shining Adventure                | Ballin, Hugo                      | Hugo Ballin                         | tt0016341 |
| 1746523376 | 1915 | 1915 | The Fatal Card                       | The Fatal Card                       | Kirkwood, James                   | James Kirkwood                      | tt0005305 |
| 1746532822 | 1916 | 1916 | God's Half Acre                      | God's Half Acre                      | Carewe, Edwin                     | Edwin Carewe                        | tt0006730 |
| 1746582614 | 1938 | 1938 | Broadway Musketeers                  | Broadway Musketeers                  | Farrow, John                      | John Farrow                         | tt0029948 |
| 1746583724 | 1930 | 1930 | The Ship From Shanghai               | The Ship from Shanghai               | Brabin, Charles                   | Charles Brabin                      | tt0021365 |
| 1746566056 | 1958 | 1958 | I Want to Live!                      | I Want to Live!                      | Wise, Robert                      | Robert Wise                         | tt0051758 |
| 1769970567 | 1966 | 1966 | The Swap and How They Make It        | The Swap and How They Make It        | Sarno, Joe                        | Joseph W. Sarno                     | tt0061050 |
| 1746219230 | 1972 | 1972 | Conquest of the Planet of the Apes   | Conquest of the Planet of the Apes   | Thompson, J. Lee                  | J. Lee Thompson                     | tt0068408 |

|                   |             |             |                                                  |                                                 |                              |                      |                  |
|-------------------|-------------|-------------|--------------------------------------------------|-------------------------------------------------|------------------------------|----------------------|------------------|
| 1746525151        | 1921        | 1921        | Molly O'                                         | Molly O'                                        | Jones, F. Richard            | F. Richard Jones     | tt0012468        |
| 1746585111        | 1930        | 1930        | Wild Company                                     | Wild Company                                    | McCarey, Leo                 | Leo McCarey          | tt0021554        |
| 1746578916        | 1958        | 1958        | This Happy Feeling                               | This Happy Feeling                              | Edwards, Blake               | Blake Edwards        | tt0052291        |
| 1746475276        | 1944        | 1944        | Career Girl                                      | Career Girl                                     | Fox, Wallace W.              | Wallace Fox          | tt0035714        |
| 1746501138        | 1910        | 1910        | A Romance of the Western Hills                   | A Romance of the Western Hills                  | Griffith, D. W.              | D.W. Griffith        | tt0001387        |
| 1746525153        | 1921        | 1921        | The Mask                                         | The Mask                                        | Bracken, Bertram             | Bertram Bracken      | tt0012450        |
| 1746563806        | 1952        | 1951        | Death of a Salesman                              | Death of a Salesman                             | Benedek, Laslo               | Laslo Benedek        | tt0043458        |
| 1746421327        | 1981        | 1981        | Wolfen                                           | Wolfen                                          | Wadleigh, Michael            | Michael Wadleigh     | tt0083336        |
| 1769974253        | 1916        | 1916        | Tried For His Own Murder                         | Tried for His Own Murder                        | Brooke, Van Dyke             | Van Dyke Brooke      | tt0006181        |
| 1746475251        | 1948        | 1948        | The Emperor Waltz                                | The Emperor Waltz                               | Wilder, Billy                | Billy Wilder         | tt0040317        |
| 1746453931        | 1999        | 1999        | Man of the Century                               | Man of the Century                              | Abraham, Adam                | Adam Abraham         | tt0138537        |
| 1746475273        | 1945        | 1945        | That's the Spirit                                | That's the Spirit                               | Lamont, Charles              | Charles Lamont       | tt0038157        |
| 1746583635        | 1930        | 1930        | Just Like Heaven                                 | Just Like Heaven                                | Neill, R. William            | Roy William Neill    | tt0021017        |
| 1746582634        | 1939        | 1939        | The Amazing Mr. Williams                         | The Amazing Mr. Williams                        | Hall, Alexander              | Alexander Hall       | tt0031038        |
| 1746509363        | 1926        | 1926        | The Boob                                         | The Boob                                        | Wellman, William             | William A. Wellman   | tt0016672        |
| 1746422093        | 1995        | 1995        | To Wong Foo, Thanks for Everything, Julie Newmar | To Wong Foo Thanks for Everything, Julie Newmar | Kidron, Beeban               | Beeban Kidron        | tt0114682        |
| 1746564748        | 1953        | 1953        | Code Two                                         | Code Two                                        | Wilcox, Fred M.              | Fred M. Wilcox       | tt0045636        |
| 1746582209        | 1930        | 1930        | Safety in Numbers                                | Safety in Numbers                               | Schertzinger, Victor         | Victor Schertzinger  | tt0021327        |
| 1746516320        | 1921        | 1921        | Paying the Piper                                 | Paying the Piper                                | Fitzmaurice, George          | George Fitzmaurice   | tt0012560        |
| 1746585370        | 1939        | 1939        | The Renegade Trail                               | Renegade Trail                                  | Selander, Lesley             | Lesley Selander      | tt0031847        |
| 1746211091        | 1973        | 1973        | Cleopatra Jones                                  | Cleopatra Jones                                 | Starrett, Jack               | Jack Starrett        | tt0069890        |
| 1746582020        | 1928        | 1927        | The Student Prince in Old Heidelberg             | The Student Prince in Old Heidelberg            | Lubitsch, Ernst              | Ernst Lubitsch       | tt0018451        |
| 1746437378        | 1943        | 1943        | The Human Comedy                                 | The Human Comedy                                | Brown, Clarence              | Clarence Brown       | tt0036022        |
| 1746574917        | 1935        | 1935        | Broadway Gondolier                               | Broadway Gondolier                              | Bacon, Lloyd                 | Lloyd Bacon          | tt0026142        |
| 1746467638        | 1917        | 1917        | The Reward of the Faithless                      | The Reward of the Faithless                     | Ingram, Rex                  | Rex Ingram           | tt0008512        |
| 1746574737        | 1935        | 1935        | Hot Tip                                          | Hot Tip                                         | McCarey, Ray; Gleason, James | James Gleason        | tt0026496        |
| 1746197992        | 1969        | 1969        | The Guru                                         | The Guru                                        | Ivory, James                 | James Ivory          | tt0064396        |
| 1746584556        | 1929        | 1929        | The Broadway Hooper                              | The Broadway Hooper                             | Archainbaud, George          | George Archainbaud   | tt0019728        |
| 1746583294        | 1950        | 1950        | Three Secrets                                    | Three Secrets                                   | Wise, Robert                 | Robert Wise          | tt0043045        |
| 1769969448        | 1911        | 1911        | Percy, the Masher                                | Percy, the Masher                               |                              |                      | tt0402435        |
| 1746573212        | 1932        | 1932        | Renegades of the West                            | Renegades of the West                           | Robinson, Casey              | Casey Robinson       | tt0023388        |
| 1746584903        | 1939        | 1939        | Boy's Reformatory                                | Boys' Reformatory                               | Bretherton, Howard           | Howard Bretherton    | tt0031119        |
| <b>1746473919</b> | <b>1942</b> | <b>1942</b> | <b>Seven Sweethearts</b>                         | <b>Seven Sweethearts</b>                        | <b>Borzage, Frank</b>        | <b>Frank Borzage</b> | <b>tt0035309</b> |
| 1746583588        | 1928        | 1928        | Women They Talk About                            | Women They Talk About                           | Bacon, Lloyd                 | Lloyd Bacon          | tt0019594        |
| 1769969415        | 1911        | 1911        | White Fawn's Peril                               | White Fawn's Peril                              |                              | Frank Montgomery     | tt1278474        |
| 1746453566        | 1941        | 1941        | Blondie in Society                               | Blondie in Society                              | Strayer, Frank R.            | Frank R. Strayer     | tt0033404        |
| 1746433737        | 1992        | 1992        | Raising Cain                                     | Raising Cain                                    | De Palma, Brian              | Brian De Palma       | tt0105217        |
| 1745372609        | 2008        | 2008        | I.O.U.S.A.                                       | I.O.U.S.A.                                      | Creadon, Patrick             | Patrick Creadon      | tt0963807        |
| 1746492236        | 1948        | 1948        | Mr. Reckless                                     | Mr. Reckless                                    | McDonald, Frank              | Frank McDonald       | tt0040616        |
| 1746219251        | 1980        | 1980        | Alligator                                        | Alligator                                       | Teague, Lewis                | Lewis Teague         | tt0080354        |
| 1746573427        | 1931        | 1931        | Corsair                                          | Corsair                                         | West, Roland                 | Roland West          | tt0021764        |
| 1746520109        | 1926        | 1926        | Valencia                                         | Valencia                                        | Buchowetzki, Dimitri         | Dimitri Buchowetzki  | tt0017509        |
| 1746504758        | 1922        | 1922        | The Beauty Shop                                  | The Beauty Shop                                 | Dillon, Edward               | Edward Dillon        | tt0012927        |
| 1746555355        | 1956        | 1956        | The First Texan                                  | The First Texan                                 | Haskin, Byron                | Byron Haskin         | tt0049211        |
| 1746581504        | 1951        | 1951        | Fighting Coast Guard                             | Fighting Coast Guard                            | Kane, Joseph                 | Joseph Kane          | tt0043531        |
| 1746409456        | 1991        | 1991        | The Marrying Man                                 | The Marrying Man                                | Rees, Jerry                  | Jerry Rees           | tt0102411        |
| 1746408884        | 1985        | 1985        | Porky's Revenge                                  | Porky's Revenge                                 | Komack, James                | James Komack         | tt0089826        |
| 1746580740        | 1937        | 1937        | Boothill Brigade                                 | Boothill Brigade                                | Newfield, Sam                | Sam Newfield         | tt0028645        |
| 1745309353        | 2005        | 2005        | The 40 Year Old Virgin                           | The 40 Year Old Virgin                          | Apatow, Judd                 | Judd Apatow          | tt0405422        |
| 1746530748        | 1948        | 1948        | Trouble Preferred                                | Trouble Preferred                               | Tinling, James               | James Tinling        | tt0041990        |
| 1746503547        | 1919        | 1919        | A Trick of Fate                                  | A Trick of Fate                                 | Hickman, Howard              | Howard C. Hickman    | tt0010802        |
| 1746435160        | 1940        | 1940        | Edison, the Man                                  | Edison, the Man                                 | Brown, Clarence              | Clarence Brown       | tt0032432        |
| 1746408824        | 1983        | 1983        | Hercules                                         | Hercules                                        | Coates, Lewis                | Luigi Cozzi          | tt0085672        |
| 1769972171        | 1962        | 1962        | Adam and Six Eves                                | Adam and Six Eves                               | Wallis, John                 | John Wallis          | tt0206534        |
| 1746570095        | 1934        | 1934        | The Count of Monte Cristo                        | The Count of Monte Cristo                       | Lee, Rowland V.              | Rowland V. Lee       | tt0025004        |
| 1746499970        | 1924        | 1924        | Ride for Your Life                               | Ride for Your Life                              | Sedgwick, Edward             | Edward Sedgwick      | tt0015275        |
| 1746580507        | 1935        | 1935        | Born to Battle                                   | Born to Battle                                  |                              | Harry S. Webb        | tt0026130        |



|            |      |      |                                       |                                       |                                   |                      |            |
|------------|------|------|---------------------------------------|---------------------------------------|-----------------------------------|----------------------|------------|
| 1746218431 | 1968 | 1968 | Uptight                               | Uptight                               | Dassin, Jules                     | Jules Dassin         | tt0063748  |
| 1746475948 | 1947 | 1947 | Singapore                             | Singapore                             | Brahm, John                       | John Brahm           | tt0039829  |
| 1746581182 | 1958 | 1958 | Unwed Mother                          | Unwed Mother                          | Doniger, Walter A.                | Walter Doniger       | tt0052341  |
| 1746507809 | 1924 | 1924 | Gerald Cranston's Lady                | Gerald Cranston's Lady                | Flynn, Emmett J.                  | Emmett J. Flynn      | tt0014942  |
| 1746555240 | 1955 | 1954 | Naughty New Orleans                   | Naughty New Orleans                   | Baldwin, Sidney                   | Sidney Baldwin       | tt0163762  |
| 1746583311 | 1930 | 1930 | The Last Dance                        | The Last Dance                        | Pembroke, Scott                   | Scott Pembroke       | tt0021049  |
| 1746583090 | 1936 | 1936 | The General Died at Dawn              | The General Died at Dawn              | Milestone, Lewis                  | Lewis Milestone      | tt0027664  |
| 1746503635 | 1919 | 1919 | The Wicked Darling                    | The Wicked Darling                    | Browning, Tod                     | Tod Browning         | tt0010890  |
| 1746502430 | 1914 | 1914 | Should a Woman Divorce?               | Should a Woman Divorce?               | McKim, Edward                     | Edwin McKim          | tt0004591  |
| 1746475671 | 1946 | 1946 | The Haunted Mine                      | The Haunted Mine                      | Abrahams, Derwin M.               | Derwin Abrahams      | tt0038591  |
| 1746579045 | 1951 | 1951 | Silver Canyon                         | Silver Canyon                         | English, John                     | John English         | tt0044035  |
| 1745357898 | 2003 | 2003 | National Security                     | National Security                     | Dugan, Dennis                     | Dennis Dugan         | tt0271668  |
| 1746393300 | 1985 | 1985 | Remo Williams: The Adventure Begins   | Remo Williams: The Adventure Begins   | Hamilton, Guy                     | Guy Hamilton         | tt0089901  |
| 1746574230 | 1963 | 1963 | The Nutty Professor                   | The Nutty Professor                   | Lewis, Jerry                      | Jerry Lewis          | tt0057372  |
| 1746269698 | 1980 | 1980 | Cheech and Chong's Next Movie         | Cheech and Chong's Next Movie         | Chong, Thomas                     | Tommy Chong          | tt0080520  |
| 1746514922 | 1915 | 1915 | The Butterfly                         | The Butterfly                         | Lund, O. A. C.                    | O.A.C. Lund          | tt0005042  |
| 1746577679 | 1938 | 1938 | King of Alcatraz                      | King of Alcatraz                      | Florey, Robert                    | Robert Florey        | tt0030322  |
| 1746583618 | 1930 | 1930 | The Eyes of the World                 | The Eyes of the World                 | King, Henry                       | Henry King           | tt0020867  |
| 1746234779 | 1972 | 1972 | Boxcar Bertha                         | Boxcar Bertha                         | Scorsese, Martin                  | Martin Scorsese      | tt0068309  |
| 1746509005 | 1926 | 1926 | Three Pals                            | Three Pals                            | McGaugh, Wilbur                   | Wilbur McGaugh       | tt0017465  |
| 1746454817 | 1942 | 1942 | Criminal Investigator                 | Criminal Investigator                 | Yarbrough, Jean                   | Jean Yarbrough       | tt0034621  |
| 1746520317 | 1925 | 1925 | Reckless Courage                      | Reckless Courage                      | Gibson, Tom                       | Tom Gibson           | tt0016271  |
| 1746577825 | 1938 | 1938 | The Missing Guest                     | The Missing Guest                     | Rawlins, John                     | John Rawlins         | tt0030455  |
| 1746573741 | 1957 | 1957 | The Brain from Planet Arous           | The Brain from Planet Arous           | Hertz, Nathan                     | Nathan Juran         | tt0050210  |
| 1746208203 | 1969 | 1969 | John and Mary                         | John and Mary                         | Yates, Peter                      | Peter Yates          | tt0064513  |
| 1745339873 | 2004 | 2003 | I Am David                            | I Am David                            | Feig, Paul                        | Paul Feig            | tt0327919  |
| 1746434363 | 1996 | 1996 | A Thin Line Between Love and Hate     | A Thin Line Between Love and Hate     | Lawrence, Martin                  | Martin Lawrence      | tt0117891  |
| 1746424397 | 1943 | 1943 | Is Everybody Happy?                   | Is Everybody Happy?                   | Barton, Charles                   | Charles Barton       | tt0036045  |
| 1745359175 | 2009 | 2009 | Duplicity                             | Duplicity                             | Gilroy, Tony                      | Tony Gilroy          | tt1135487  |
| 1745340510 | 2003 | 2003 | Billabong Odyssey                     | Billabong Odyssey                     | Boston, Philip                    | Philip Boston        | tt0379713  |
| 1746475537 | 1944 | 1944 | The Conspirators                      | The Conspirators                      | Negulesco, Jean                   | Jean Negulesco       | tt0036719  |
| 1746235279 | 1974 | 1974 | Gone in 60 Seconds                    | Gone in 60 Seconds                    | Halicki, H. B.                    | H.B. Halicki         | tt0071571  |
| 1746554498 | 1964 | 1964 | The Night Walker                      | The Night Walker                      | Castle, William                   | William Castle       | tt0058403  |
| 1746585368 | 1940 | 1940 | The Lady in Question                  | The Lady in Question                  | Vidor, Charles                    | Charles Vidor        | tt0032686  |
| 1746514218 | 1927 | 1927 | Character Studies                     | Character Studies                     |                                   |                      | tt0367593  |
| 1746580786 | 1938 | 1938 | Bringing Up Baby                      | Bringing Up Baby                      | Hawks, Howard                     | Howard Hawks         | tt0029947  |
| 1746507890 | 1924 | 1924 | The Lash of Pinto Pete                | The Lash of Pinto Pete                | Ford, Francis                     | Francis Ford         | tt0127641  |
| 1746520059 | 1924 | 1924 | Fangs of the Wolf                     | Fangs of the Wolf                     | Hoyt, Harry O.; Golden, Joseph A. | Harry O. Hoyt        | tt0356599  |
| 1746464929 | 1946 | 1946 | Blondie Knows Best                    | Blondie Knows Best                    | Berlin, Abby                      | Abby Berlin          | tt0038367  |
| 1746583810 | 1929 | 1928 | Scarlet Seas                          | Scarlet Seas                          | Dillon, John Francis              | John Francis Dillon  | tt0020370  |
| 1746582432 | 1936 | 1936 | Give Me Your Heart                    | Give Me Your Heart                    | Mayo, Archie L.                   | Archie Mayo          | tt0027679  |
| 1746583379 | 1929 | 1929 | So This Is College                    | So This Is College                    | Wood, Sam                         | Sam Wood             | tt0020425  |
| 1746524126 | 1917 | 1917 | Her Good Name                         | Her Good Name                         | Terwilliger, George               | George Terwilliger   | tt01175721 |
| 1746555917 | 1956 | 1956 | Run for the Sun                       | Run for the Sun                       | Boulting, Roy                     | Roy Boulting         | tt0049696  |
| 1746424186 | 1940 | 1940 | Texas Stagecoach                      | Texas Stagecoach                      | Lewis, Joseph H.                  | Joseph H. Lewis      | tt0033142  |
| 1746508096 | 1949 | 1949 | Rope of Sand                          | Rope of Sand                          | Dieterle, William                 | William Dieterle     | tt0041822  |
| 1769970554 | 1968 | 1968 | Chantal                               | Chantal                               | Lindus, Allan                     | Nick Millard         | tt0212855  |
| 1746514138 | 1915 | 1915 | The Second in Command                 | The Second in Command                 | Bowman, William J.                | William Bowman       | tt0006016  |
| 1746578930 | 1962 | 1962 | Hemingway's Adventures of a Young Man | Hemingway's Adventures of a Young Man | Ritt, Martin                      | Martin Ritt          | tt0056063  |
| 1745272293 | 2000 | 2000 | State and Main                        | State and Main                        | Mamet, David                      | David Mamet          | tt0120202  |
| 1746491744 | 1944 | 1944 | Shake Hands with Murder               | Shake Hands with Murder               | Herman, Albert                    | Albert Herman        | tt0037267  |
| 1746584028 | 1936 | 1936 | Heart of the West                     | Heart of the West                     | Bretherton, Howard                | Howard Bretherton    | tt0027725  |
| 1746509542 | 1926 | 1925 | My Lady of Whims                      | My Lady of Whims                      | Fitzgerald, Dallas M.             | Dallas M. Fitzgerald | tt0017184  |
| 1746507828 | 1926 | 1926 | The Passionate Quest                  | The Passionate Quest                  | Blackton, J. Stuart               | J. Stuart Blackton   | tt0017255  |
| 1745293812 | 2005 | 2005 | Elektra                               | Elektra                               | Bowman, Rob                       | Rob Bowman           | tt0357277  |
| 1769970682 | 1968 | 1968 | Kiss-Off                              | The Kiss Off                          |                                   | D.E. Jones           | tt0264760  |
| 1746577711 | 1933 | 1933 | The Woman I Stole                     | The Woman I Stole                     | Cummings, Irving                  | Irving Cummings      | tt0024783  |

|            |      |      |                              |                              |                       |                      |           |
|------------|------|------|------------------------------|------------------------------|-----------------------|----------------------|-----------|
| 1746436038 | 1943 | 1943 | The Moon Is Down             | The Moon Is Down             | Pichel, Irving        | Irving Pichel        | tt0036170 |
| 1745342289 | 2008 | 2007 | Married Life                 | Married Life                 | Sachs, Ira            | Ira Sachs            | tt0804505 |
| 1746394181 | 1990 | 1990 | Navy Seals                   | Navy Seals                   | Teague, Lewis         | Lewis Teague         | tt0100232 |
| 1746508872 | 1924 | 1924 | The Man Who Fights Alone     | The Man Who Fights Alone     | Worsley, Wallace      | Wallace Worsley      | tt0015111 |
| 1746578036 | 1937 | 1937 | Exiled to Shanghai           | Exiled to Shanghai           | Grinde, Nick          | Nick Grinde          | tt0028845 |
| 1746514786 | 1915 | 1915 | The Chalice of Courage       | The Chalice of Courage       | Sturgeon, Rollin S.   | Rollin S. Sturgeon   | tt0005073 |
| 1746439776 | 1998 | 1998 | Holy Man                     | Holy Man                     | Herek, Stephen        | Stephen Herek        | tt0120701 |
| 1746393164 | 1988 | 1988 | Dirty Rotten Scoundrels      | Dirty Rotten Scoundrels      | Oz, Frank             | Frank Oz             | tt0095031 |
| 1746422606 | 1992 | 1992 | Folks!                       | Folks!                       | Kotcheff, Ted         | Ted Kotcheff         | tt0104283 |
| 1746409060 | 1984 | 1984 | Red Dawn                     | Red Dawn                     | Milius, John          | John Milius          | tt0087985 |
| 1746455807 | 1998 | 1998 | Wide Awake                   | Wide Awake                   | Shyamalan, M. Night   | M. Night Shyamalan   | tt0120510 |
| 1746574382 | 1963 | 1963 | Black Zoo                    | Black Zoo                    | Gordon, Robert        | Robert Gordon        | tt0056872 |
| 1746492086 | 1947 | 1947 | Danger Street                | Danger Street                | Landers, Lew          | Lew Landers          | tt0039298 |
| 1746514205 | 1910 | 1910 | Waiter No. 5                 | Waiter No. 5                 | Griffith, D. W.       | D.W. Griffith        | tt0001445 |
| 1746497637 | 1918 | 1918 | The Trail to Yesterday       | The Trail to Yesterday       | Carewe, Edwin         | Edwin Carewe         | tt0009718 |
| 1746507857 | 1927 | 1927 | The Taxi Dancer              | The Taxi Dancer              | Millarde, Harry       | Harry F. Millarde    | tt0018465 |
| 1746435715 | 1942 | 1942 | Treat 'Em Rough              | Treat 'Em Rough              | Taylor, Ray           | Ray Taylor           | tt0035471 |
| 1746520281 | 1926 | 1926 | The Love Toy                 | The Love Toy                 | Kenton, Erle C.       | Erle C. Kenton       | tt0017085 |
| 1746439471 | 1943 | 1943 | The Desperadoes              | The Desperadoes              | Vidor, Charles        | Charles Vidor        | tt0035798 |
| 1746394742 | 1985 | 1985 | Real Genius                  | Real Genius                  | Coolidge, Martha      | Martha Coolidge      | tt0089886 |
| 1746437430 | 1942 | 1942 | The Moon and Sixpence        | The Moon and Sixpence        | Lewin, Albert         | Albert Lewin         | tt0035078 |
| 1746561837 | 1955 | 1955 | Gang Busters                 | Gang Busters                 | Karn, Bill            | Bill Karn            | tt0174676 |
| 1769970727 | 1912 | 1912 | When the Heart Calls         | When the Heart Calls         |                       | Richard Garrick      | tt0401884 |
| 1746509247 | 1925 | 1925 | The Prince of Pep            | The Prince of Pep            | Nelson, Jack          | Jack Nelson          | tt0005929 |
| 1746513631 | 1916 | 1916 | The Misleading Lady          | The Misleading Lady          | Berthelet, Arthur     | Arthur Berthelet     | tt0005752 |
| 1746580537 | 1938 | 1938 | In Early Arizona             | In Early Arizona             | Levering, Joseph      | Joseph Levering      | tt0030269 |
| 1746455762 | 1997 | 1997 | As Good As It Gets           | As Good as It Gets           | Brooks, James L.      | James L. Brooks      | tt0119822 |
| 1746580653 | 1935 | 1935 | Gallant Defender             | Gallant Defender             | Selman, David         | David Selman         | tt0026396 |
| 1769971099 | 1969 | 1969 | A Bride for Brenda           | A Bride for Brenda           | Goetz, Tommy          | Tommy Goetz          | tt0211994 |
| 1769970416 | 1966 | 1966 | The Twisted Sex              | The Twisted Sex              |                       | Sande N. Johnsen     | tt0260453 |
| 1746532943 | 1927 | 1927 | The Claw                     | The Claw                     | Olcott, Sidney        | Sidney Olcott        | tt0017757 |
| 1746570969 | 1953 | 1952 | No Time for Flowers          | No Time for Flowers          | Siegel, Don           | Don Siegel           | tt0044971 |
| 1746410590 | 1991 | 1991 | Toy Soldiers                 | Toy Soldiers                 | Petrie, Jr., Daniel   | Daniel Petrie Jr.    | tt0103112 |
| 1746574102 | 1961 | 1961 | Secret of Deep Harbor        | Secret of Deep Harbor        | Cahn, Edward L.       | Edward L. Cahn       | tt0055424 |
| 1746465081 | 1945 | 1945 | Objective, Burma!            | Objective, Burma!            | Walsh, Raoul          | Raoul Walsh          | tt0037954 |
| 1746507898 | 1927 | 1927 | The Price of Honor           | The Price of Honor           | Griffith, E. H.       | Edward H. Griffith   | tt0018277 |
| 1746504352 | 1918 | 1918 | Daddy's Girl                 | Daddy's Girl                 | Bertram, William      | William Bertram      | tt0184373 |
| 1746520978 | 1950 | 1950 | The Desert Hawk              | The Desert Hawk              | Cordova, Frederick de | Frederick De Cordova | tt0042389 |
| 1746438201 | 1944 | 1944 | The White Cliffs of Dover    | The White Cliffs of Dover    | Brown, Clarence       | Clarence Brown       | tt0037462 |
| 1769970486 | 1966 | 1966 | Naked Fog                    | Naked Fog                    | Sarno, Joe            | Joseph W. Sarno      | tt0057352 |
| 1746467376 | 1917 | 1917 | The Desert Man               | The Desert Man               | Hart, William S.      | William S. Hart      | tt0007849 |
| 1746500667 | 1925 | 1924 | Greed                        | Greed                        |                       | Erich von Stroheim   | tt0015881 |
| 1746501475 | 1915 | 1915 | Her Great Match              | Her Great Match              | Plaisetty, Rene       | René Plaisetty       | tt0005470 |
| 1746581006 | 1960 | 1960 | Please Don't Eat the Daisies | Please Don't Eat the Daisies | Walters, Charles      | Charles Walters      | tt0054188 |
| 1746525007 | 1915 | 1915 | Rumpelstiltskin              | Rumpelstiltskin              | West, Raymond B.      | Raymond B. West      | tt0005987 |
| 1746513474 | 1910 | 1910 | The New Magdalene            | The New Magdalen             | Golden, Joseph A.     | Joseph A. Golden     | tt0001335 |
| 1746501368 | 1916 | 1916 | The Kiss of Hate             | The Kiss of Hate             | Nigh, William         | William Nigh         | tt0006899 |
| 1746504053 | 1918 | 1918 | Broadway Bill                | Broadway Bill                | Balshofer, Fred J.    | Fred J. Balshofer    | tt0008929 |
| 1746574163 | 1959 | 1958 | The Two-Headed Spy           | The Two Headed Spy           | DeToth, Andre         | André De Toth        | tt0052327 |
| 1746582369 | 1930 | 1930 | Feet First                   | Feet First                   | Bruckman, Clyde       | Clyde Bruckman       | tt0020876 |
| 1746200002 | 1969 | 1969 | 100 Rifles                   | 100 Rifles                   | Gries, Tom            | Tom Gries            | tt0063970 |
| 1746585421 | 1939 | 1939 | Day-Time Wife                | Day Time Wife                | Ratoff, Gregory       | Gregory Ratoff       | tt0031215 |
| 1746483521 | 1917 | 1917 | When You and I Were Young    | When You and I Were Young    | Blaché, Alice Guy     | Alice Guy            | tt0184013 |
| 1745302770 | 2005 | 2004 | Mysterious Skin              | Mysterious Skin              | Araki, Gregg          | Gregg Araki          | tt0370986 |
| 1746500424 | 1925 | 1925 | The Pearl of Love            | Pearl of Love                | Dadmun, Leon E.       | Leon Danmun          | tt0016207 |
| 1746577406 | 1963 | 1963 | The Saucy Aussie             | The Saucy Aussie             | Bowley, Walter        | Walter Bowley        | tt0257100 |
| 1746499961 | 1946 | 1946 | The Blue Dahlia              | The Blue Dahlia              | Marshall, George      | George Marshall      | tt0038369 |

|            |      |      |                                         |                                         |                             |                         |           |
|------------|------|------|-----------------------------------------|-----------------------------------------|-----------------------------|-------------------------|-----------|
| 1746577202 | 1962 | 1961 | Too Late Blues                          | Too Late Blues                          | Cassavetes, John            | John Cassavetes         | tt0055534 |
| 1746574139 | 1963 | 1963 | Fun in Acapulco                         | Fun in Acapulco                         | Thorpe, Richard             | Richard Thorpe          | tt0057083 |
| 1746581356 | 1928 | 1928 | Thunder Riders                          | Thunder Riders                          | Wylar, William              | William Wylar           | tt0019474 |
| 1746465140 | 1944 | 1944 | Double Indemnity                        | Double Indemnity                        | Wilder, Billy               | Billy Wilder            | tt0036775 |
| 1746560734 | 1932 | 1932 | The Strange Case of Clara Deane         | The Strange Case of Clara Deane         | Gasnier, Louis; Marcin, Max | Louis J. Gasnier        | tt0023521 |
| 1746466847 | 1917 | 1917 | The Mystic Hour                         | The Mystic Hour                         | Ridgely, Richard            | Richard Ridgely         | tt0008357 |
| 1746520564 | 1926 | 1926 | The Unknown Soldier                     | The Unknown Soldier                     | Hoffman, Renaud             | Renaud Hoffman          | tt0017502 |
| 1746424395 | 1942 | 1942 | Moonlight Masquerade                    | Moonlight Masquerade                    | Auer, John H.               | John H. Auer            | tt0035079 |
| 1746553371 | 1963 | 1963 | Captain Newman, M. D.                   | Captain Newman, M. D.                   | Miller, David               | David Miller            | tt0056903 |
| 1746524058 | 1914 | 1914 | Springtime                              | Springtime                              | Davis, William S.           | Will S. Davis           | tt0004632 |
| 1746410889 | 1989 | 1989 | Immediate Family                        | Immediate Family                        | Kaplan, Jonathan            | Jonathan Kaplan         | tt0097567 |
| 1746580550 | 1937 | 1937 | The Go Getter                           | The Go Getter                           | Berkeley, Busby             | Busby Berkeley          | tt0028939 |
| 1746582276 | 1931 | 1931 | Laughing Sinners                        | Laughing Sinners                        | Beaumont, Harry             | Harry Beaumont          | tt0022059 |
| 1746500310 | 1926 | 1926 | Fangs of Justice                        | Fangs of Justice                        | Smith, Noel Mason           | Noel M. Smith           | tt0016841 |
| 1746585439 | 1940 | 1940 | The Great Plane Robbery                 | The Great Plane Robbery                 | Collins, Lewis D.           | Lewis D. Collins        | tt0032555 |
| 1746211248 | 1970 | 1970 | Where's Poppa?                          | Where's Poppa?                          | Reiner, Carl                | Carl Reiner             | tt0066563 |
| 1769970610 | 1966 | 1966 | The Love Cult                           | The Love Cult                           | Dee, T. A.                  | Barry Mahon             | tt0151395 |
| 1746436129 | 1940 | 1940 | The Lone Wolf Meets a Lady              | The Lone Wolf Meets a Lady              | Salkow, Sidney              | Sidney Salkow           | tt0032725 |
| 1746567754 | 1933 | 1933 | The Worst Woman in Paris?               | The Worst Woman in Paris?               | Bell, Monta                 | Monta Bell              | tt0024789 |
| 1745393857 | 2008 | 2008 | Eagle Eye                               | Eagle Eye                               | Caruso, D. J.               | D.J. Caruso             | tt1059786 |
| 1746504598 | 1918 | 1918 | Wild Women                              | Wild Women                              | Ford, Jack                  | John Ford               | tt0009811 |
| 1746582571 | 1934 | 1934 | Springtime for Henry                    | Springtime for Henry                    | Tuttle, Frank               | Frank Tuttle            | tt0025825 |
| 1746520116 | 1949 | 1949 | Tarzan's Magic Fountain                 | Tarzan's Magic Fountain                 | Sholem, Lee                 | Lee Sholem              | tt0041947 |
| 1746580963 | 1951 | 1951 | Drums in the Deep South                 | Drums in the Deep South                 | Menzies, William Cameron    | William Cameron Menzies | tt0043482 |
| 1746524235 | 1916 | 1916 | The Snowbird                            | The Snowbird                            | Carewe, Edwin               | Edwin Carewe            | tt0007362 |
| 1746235936 | 1978 | 1978 | Thank God It's Friday                   | Thank God It's Friday                   | Klane, Robert               | Robert Klane            | tt0078382 |
| 1746233897 | 1967 | 1967 | Tony Rome                               | Tony Rome                               | Douglas, Gordon             | Gordon Douglas          | tt0062380 |
| 1746394647 | 1985 | 1985 | Day of the Dead                         | Day of the Dead                         | Romero, George A.           | George A. Romero        | tt0088993 |
| 1746533162 | 1927 | 1927 | Horse Shoes                             | Horse Shoes                             | Bruckman, Clyde             | Clyde Bruckman          | tt0018011 |
| 1746393261 | 1987 | 1987 | *batteries not included                 | *batteries not included                 | Robbins, Matthew            | Matthew Robbins         | tt0092494 |
| 1746199542 | 1969 | 1969 | Mackenna's Gold                         | Mackenna's Gold                         | Thompson, J. Lee            | J. Lee Thompson         | tt0064615 |
| 1746582550 | 1936 | 1936 | Suzy                                    | Suzy                                    | Fitzmaurice, Geo.           | George Fitzmaurice      | tt0028330 |
| 1746520236 | 1926 | 1926 | Battling Butler                         | Battling Butler                         | Keaton, Buster              | Buster Keaton           | tt0016630 |
| 1769975749 | 1918 | 1918 | Know Thy Wife                           | Know Thy Wife                           | Christie, Al E.             | Al Christie             | tt0249661 |
| 1746410684 | 1992 | 1992 | Hero                                    | Hero                                    | Frears, Stephen             | Stephen Frears          | tt0104412 |
| 1746520130 | 1926 | 1926 | The Block Signal                        | The Block Signal                        | O'Connor, Frank             | Frank O'Connor          | tt0016660 |
| 1746578043 | 1937 | 1937 | Dance Charlie Dance                     | Dance Charlie Dance                     | McDonald, Frank             | Frank McDonald          | tt0028758 |
| 1746474984 | 1948 | 1948 | My Dog Rusty                            | My Dog Rusty                            | Landers, Lew                | Lew Landers             | tt0040627 |
| 1746249039 | 1973 | 1972 | Pink Flamingos                          | Pink Flamingos                          | Waters, John                | John Waters             | tt0069089 |
| 1746582394 | 1951 | 1951 | Varieties on Parade                     | Varieties on Parade                     | Ormond, Ron                 | Ron Ormond              | tt0045284 |
| 1746218268 | 1967 | 1967 | Rough Night in Jericho                  | Rough Night in Jericho                  | Laven, Arnold               | Arnold Laven            | tt0062218 |
| 1746419907 | 1983 | 1983 | Flashdance                              | Flashdance                              | Lyne, Adrian                | Adrian Lyne             | tt0085549 |
| 1746502738 | 1915 | 1915 | Flame of Passion                        | Flame of Passion                        | Terriss, Tom                | Tom Terriss             | tt0005329 |
| 1746219691 | 1971 | 1971 | The Last Rebel                          | The Last Rebel                          | McCoy, Denys                | Larry G. Spangler       | tt0065968 |
| 1746523933 | 1927 | 1927 | Heroes in Blue                          | Heroes in Blue                          | Worne, Duke                 | Duke Worne              | tt0017986 |
| 1746573935 | 1962 | 1962 | Damon and Pythias                       | Damon and Pythias                       | Bernhardt, Curtis           | Curtis Bernhardt        | tt0055885 |
| 1746520804 | 1949 | 1949 | Post Office Investigator                | Post Office Investigator                | Blair, George               | George Blair            | tt0041765 |
| 1745342008 | 2008 | 2008 | The Sisterhood of the Traveling Pants 2 | The Sisterhood of the Traveling Pants 2 | Hamri, Sanaa                | Sanaa Hamri             | tt1018785 |
| 1746500633 | 1926 | 1926 | The Devil Horse                         | The Devil Horse                         | Jackman, Fred               | Fred Jackman            | tt0016782 |
| 1746393411 | 1986 | 1986 | Chopping Mall                           | Chopping Mall                           | Wynorski, Jim               | Jim Wynorski            | tt0090837 |
| 1746515718 | 1922 | 1922 | So This Is Arizona                      | So This Is Arizona                      | Ford, Francis               | Francis Ford            | tt0013616 |
| 1746202855 | 1971 | 1971 | Bless the Beasts & Children             | Bless the Beasts & Children             | Kramer, Stanley             | Stanley Kramer          | tt0068286 |
| 1746584779 | 1929 | 1929 | The Fall of Eve                         | The Fall of Eve                         | Strayer, Frank R.           | Frank R. Strayer        | tt0019865 |
| 1746250781 | 1980 | 1980 | Raging Bull                             | Raging Bull                             | Scorsese, Martin            | Martin Scorsese         | tt0081398 |
| 1746532471 | 1916 | 1916 | Destiny's Toy                           | Destiny's Toy                           | O'Brien, John B.            | John B. O'Brien         | tt0006583 |
| 1746438622 | 1942 | 1942 | Halfway to Shanghai                     | Halfway to Shanghai                     | Rawlins, John               | John Rawlins            | tt0034825 |
| 1746509532 | 1925 | 1925 | Easy Going Gordon                       | Easy Going Gordon                       | Worne, Duke                 | Duke Worne              | tt0130647 |

|            |      |      |                               |                               |                                  |                        |           |
|------------|------|------|-------------------------------|-------------------------------|----------------------------------|------------------------|-----------|
| 1746211503 | 1970 | 1970 | The Honeymoon Killers         | The Honeymoon Killers         | Kastle, Leonard                  | Leonard Kastle         | tt0064437 |
| 1746500442 | 1925 | 1925 | Tracked in the Snow Country   | Tracked in the Snow Country   | Raymaker, Herman C.              | Herman C. Raymaker     | tt0016447 |
| 1746504375 | 1922 | 1922 | Partners of the Sunset        | Partners of the Sunset        | Townley, Robert H.               | Robin H. Townley       | tt0013482 |
| 1746577975 | 1939 | 1939 | Three Texas Steers            | Three Texas Steers            | Sherman, George                  | George Sherman         | tt0032032 |
| 1746492732 | 1945 | 1945 | The Vampire's Ghost           | The Vampire's Ghost           | Selander, Lesley                 | Lesley Selander        | tt0038214 |
| 1746485539 | 1918 | 1918 | Laughing Bill Hyde            | Laughing Bill Hyde            | Henley, Hobart                   | Hobart Henley          | tt0009279 |
| 1746435168 | 1941 | 1941 | You're Out of Luck            | You're Out of Luck            | Bretherton, Howard               | Howard Bretherton      | tt0034410 |
| 1769970790 | 1912 | 1912 | A Helping Hand                | The Helping Hand              |                                  | Harry C. Mathews       | tt0329167 |
| 1746583502 | 1928 | 1928 | The Night Bird                | The Night Bird                | Newmeyer, Fred                   | Fred C. Newmeyer       | tt0019209 |
| 1745340766 | 2004 | 2004 | After the Sunset              | After the Sunset              | Ratner, Brett                    | Brett Ratner           | tt0367479 |
| 1746530675 | 1950 | 1950 | The Breaking Point            | The Breaking Point            | Curtiz, Michael                  | Michael Curtiz         | tt0042281 |
| 1746585409 | 1940 | 1940 | The Earl of Chicago           | The Earl of Chicago           | Thorpe, Richard; Saville, Victor | Richard Thorpe         | tt0032424 |
| 1745360013 | 2002 | 2002 | Solaris                       | Solaris                       | Soderbergh, Steven               | Steven Soderbergh      | tt0307479 |
| 1746454454 | 1944 | 1944 | Strange Affair                | Strange Affair                | Green, Alfred E.                 | Alfred E. Green        | tt0037317 |
| 1746584689 | 1930 | 1930 | Reno                          | Reno                          | Crone, George J.                 | George Crone           | tt0021296 |
| 1746513476 | 1910 | 1910 | The Seal of the Church        | The Seal of the Church        |                                  | William F. Haddock     | tt0001391 |
| 1746198468 | 1967 | 1967 | A Time for Killing            | A Time for Killing            | Karlson, Phil                    | Phil Karlson           | tt0062373 |
| 1746524966 | 1915 | 1915 | The Better Woman              | The Better Woman              | Golden, Joseph A.                | Joseph A. Golden       | tt0004960 |
| 1746248227 | 1967 | 1967 | Something Weird               | Something Weird               | Lewis, Herschell Gordon          | Herschell Gordon Lewis | tt0062288 |
| 1746508496 | 1924 | 1924 | The Last Man on Earth         | The Last Man on Earth         | Blystone, J. G.                  | John G. Blystone       | tt0015051 |
| 1746507739 | 1924 | 1924 | The Silent Accuser            | The Silent Accuser            | Franklin, Chester M.             | Chester M. Franklin    | tt0015332 |
| 1746578554 | 1951 | 1951 | Unknown World                 | Unknown World                 | Morse, Terrell O.                | Terry O. Morse         | tt0044167 |
| 1746580589 | 1937 | 1937 | White Bondage                 | White Bondage                 | Grinde, Nick                     | Nick Grinde            | tt0029769 |
| 1746542656 | 1926 | 1926 | Sunnyside Up                  | Sunny Side Up                 | Crisp, Donald                    | Donald Crisp           | tt0017441 |
| 1746420372 | 1986 | 1986 | Parting Glances               | Parting Glances               | Sherwood, Bill                   | Bill Sherwood          | tt0091725 |
| 1746573860 | 1956 | 1956 | Come Next Spring              | Come Next Spring              | Springsteen, R. G.               | R.G. Springsteen       | tt0049088 |
| 1746582851 | 1936 | 1936 | The Lonely Trail              | The Lonely Trail              | Kane, Joseph                     | Joseph Kane            | tt0027905 |
| 1746503866 | 1918 | 1918 | The Craving                   | The Craving                   | Ford, Francis                    | Francis Ford           | tt0008978 |
| 1746576989 | 1960 | 1960 | Murder, Inc.                  | Murder, Inc.                  | Balaban, Burt; Rosenberg, Stuart | Burt Balaban           | tt0054102 |
| 1746393451 | 1988 | 1988 | Caddyshack II                 | Caddyshack II                 | Arkush, Allan                    | Allan Arkush           | tt0094824 |
| 1746582325 | 1931 | 1931 | Alias--The Bad Man            | Alias the Bad Man             | Rosen, Phil                      | Phil Rosen             | tt0021597 |
| 1746474979 | 1944 | 1944 | Saddle Leather Law            | Saddle Leather Law            | Kline, Benjamin                  | Benjamin H. Kline      | tt0037239 |
| 1745342791 | 2003 | 2003 | Thirteen                      | Thirteen                      | Hardwicke, Catherine             | Catherine Hardwicke    | tt0328538 |
| 1746566312 | 1957 | 1957 | Dragoon Wells Massacre        | Dragoon Wells Massacre        | Schuster, Harold                 | Harold D. Schuster     | tt0050336 |
| 1746566228 | 1958 | 1958 | Me and the Colonel            | Me and the Colonel            | Glenville, Peter                 | Peter Glenville        | tt0051915 |
| 1746569686 | 1955 | 1955 | The Seven Little Foy's        | The Seven Little Foy's        | Shavelson, Melville              | Melville Shavelson     | tt0048604 |
| 1746394446 | 1984 | 1984 | Angel                         | Angel                         | O'Neil, Robert Vincent           | Robert Vincent O'Neill | tt0086896 |
| 1769970038 | 1911 | 1911 | The Best Man Wins             | The Best Man Wins             | Ricketts, Tom                    | Tom Ricketts           | tt0001502 |
| 1746570821 | 1933 | 1933 | Murders in the Zoo            | Murders in the Zoo            | Sutherland, Edward               | A. Edward Sutherland   | tt0024360 |
| 1746569578 | 1958 | 1958 | The Fiend Who Walked the West | The Fiend Who Walked the West | Douglas, Gordon                  | Gordon Douglas         | tt0051612 |
| 1746487475 | 1920 | 1920 | The Square Shooter            | Square Shooter                | Cazeneuve, Paul                  | Paul Cazeneuve         | tt0011729 |
| 1746503850 | 1920 | 1920 | Excuse My Dust                | Excuse My Dust                | Wood, Sam                        | Sam Wood               | tt0011163 |
| 1746502895 | 1915 | 1915 | The Outlaw's Revenge          | The Outlaw's Revenge          | Cabanne, W. Christy              | Christy Cabanne        | tt0005853 |
| 1746464865 | 1941 | 1941 | Nevada City                   | Nevada City                   | Kane, Joseph                     | Joseph Kane            | tt0033944 |
| 1769970477 | 1966 | 1966 | The Flesh Game                | The Flesh Game                | Mitchell, M. M.                  | M.M. Mitchell          | tt0218253 |
| 1746566065 | 1955 | 1955 | Lucy Gallant                  | Lucy Gallant                  | Parrish, Robert                  | Robert Parrish         | tt0048318 |
| 1746585225 | 1929 | 1929 | The Sheriff's Lash            | The Sheriff's Lash            |                                  | Ben F. Wilson          | tt0339663 |
| 1746574806 | 1937 | 1937 | The Singing Marine            | The Singing Marine            | Enright, Ray                     | Ray Enright            | tt0029571 |
| 1746455234 | 1998 | 1998 | He Got Game                   | He Got Game                   | Lee, Spike                       | Spike Lee              | tt0124718 |
| 1746500191 | 1923 | 1923 | Good Men and Bad              | Good Men and Bad              | McCormick, Merrill               | Merrill McCormick      | tt0325481 |
| 1746249975 | 1976 | 1976 | The Bad News Bears            | The Bad News Bears            | Ritchie, Michael                 | Michael Ritchie        | tt0074174 |
| 1745359406 | 2004 | 2004 | Catwoman                      | Catwoman                      | Pitof                            | Pitof                  | tt0327554 |
| 1746581614 | 1928 | 1928 | The Crimson Canyon            | The Crimson Canyon            | Taylor, Ray                      | Ray Taylor             | tt0018803 |
| 1746580723 | 1935 | 1935 | His Family Tree               | His Family Tree               | Vidor, Charles                   | Charles Vidor          | tt0027747 |
| 1745342077 | 2004 | 2004 | Miracle                       | Miracle                       | O'Connor, Gavin                  | Gavin O'Connor         | tt0349825 |
| 1746573757 | 1960 | 1960 | My Dog, Buddy                 | My Dog, Buddy                 | Kellogg, Ray                     | Ray Kellogg            | tt0169062 |
| 1746575048 | 1933 | 1933 | Oliver Twist                  | Oliver Twist                  | Cowen, William J.                | William J. Cowen       | tt0024405 |

|            |      |      |                               |                               |                      |                     |           |
|------------|------|------|-------------------------------|-------------------------------|----------------------|---------------------|-----------|
| 1746492089 | 1948 | 1948 | Bungalow 13                   | Bungalow 13                   | Cahn, Edward L.      | Edward L. Cahn      | tt0040193 |
| 1746584456 | 1930 | 1930 | Outward Bound                 | Outward Bound                 | Milton, Robert       | Robert Milton       | tt0021225 |
| 1745342295 | 2001 | 2001 | Kate & Leopold                | Kate & Leopold                | Mangold, James       | James Mangold       | tt0035423 |
| 1746419361 | 1993 | 1993 | Life with Mikey               | Life with Mikey               | Lapine, James        | James Lapine        | tt0107413 |
| 1746533199 | 1923 | 1923 | The Custard Cup               | The Custard Cup               | Brenon, Herbert      | Herbert Brenon      | tt0013963 |
| 1746514528 | 1914 | 1914 | Thou Shalt Not                | Thou Shalt Not                | Davis, Will H.       | Will S. Davis       | tt0004694 |
| 1746436349 | 1942 | 1942 | I Was Framed                  | I Was Framed                  | Lederman, D. Ross    | D. Ross Lederman    | tt0034883 |
| 1746410655 | 1992 | 1992 | Love Potion No 9              | Love Potion No. 9             | Launer, Dale         | Dale Launer         | tt0102343 |
| 1745309410 | 2007 | 2007 | Nancy Drew                    | Nancy Drew                    | Fleming, Andrew      | Andrew Fleming      | tt0479500 |
| 1746571790 | 1931 | 1931 | The Ruling Voice              | The Ruling Voice              | Lee, Rowland V.      | Rowland V. Lee      | tt0022331 |
| 1746566211 | 1957 | 1957 | Hit and Run                   | Hit and Run                   | Haas, Hugo           | Hugo Haas           | tt0050512 |
| 1746509545 | 1927 | 1927 | Stage Kisses                  | Stage Kisses                  | Kelly, Albert        | Albert H. Kelley    | tt0018444 |
| 1746583530 | 1928 | 1928 | Call of the Heart             | The Call of the Heart         | Ford, Francis        | Francis Ford        | tt0018740 |
| 1746420358 | 1994 | 1994 | Drop Zone                     | Drop Zone                     | Badham, John         | John Badham         | tt0109676 |
| 1746582993 | 1940 | 1940 | Young Tom Edison              | Young Tom Edison              | Taurog, Norman       | Norman Taurog       | tt0033289 |
| 1746497559 | 1917 | 1917 | The Scarlet Car               | The Scarlet Car               | De Grasse, Joseph    | Joseph De Grasse    | tt0008541 |
| 1746577838 | 1938 | 1938 | Forbidden Valley              | Forbidden Valley              | Gittens, Wyndham     | Wyndham Gittens     | tt0030147 |
| 1746583071 | 1938 | 1938 | Booloo                        | Booloo                        | Elliott, Clyde E.    | Clyde E. Elliott    | tt0029935 |
| 1746580879 | 1936 | 1936 | Code of the Range             | Code of the Range             | Coleman, C. C.       | Charles C. Coleman  | tt0027454 |
| 1746573895 | 1961 | 1961 | King of Kings                 | King of Kings                 | Ray, Nicholas        | Nicholas Ray        | tt0055047 |
| 1746473875 | 1947 | 1947 | Bulldog Drummond Strikes Back | Bulldog Drummond Strikes Back | McDonald, Frank      | Frank McDonald      | tt0039228 |
| 1746208116 | 1969 | 1969 | Viva Max!                     | Viva Max                      | Paris, Jerry         | Jerry Paris         | tt0065184 |
| 1746439699 | 1998 | 1998 | Blade                         | Blade                         | Norrington, Stephen  | Stephen Norrington  | tt0120611 |
| 1746585452 | 1939 | 1939 | The Hardys Ride High          | The Hardys Ride High          | Seitz, George B.     | George B. Seitz     | tt0031403 |
| 1746465131 | 1947 | 1947 | Nightmare Alley               | Nightmare Alley               | Goulding, Edmund     | Edmund Goulding     | tt0039661 |
| 1746574678 | 1933 | 1933 | The Big Chance                | The Big Chance                | Herman, Albert       | Albert Herman       | tt0023808 |
| 1746571659 | 1910 | 1910 | Dooley's Holiday              | Dooley's Holiday              |                      | Fred J. Balshofer   | tt0359181 |
| 1746574026 | 1959 | 1959 | Watusi                        | Watusi                        | Neumann, Kurt        | Kurt Neumann        | tt0053436 |
| 1746233019 | 1967 | 1967 | Devil's Angels                | Devil's Angels                | Haller, Daniel       | Daniel Haller       | tt0061565 |
| 1746234683 | 1970 | 1970 | Five Easy Pieces              | Five Easy Pieces              | Rafelson, Bob        | Bob Rafelson        | tt0065724 |
| 1746560481 | 1932 | 1932 | Hold 'Em Jail                 | Hold 'Em Jail                 | Taurog, Norman       | Norman Taurog       | tt0023013 |
| 1746453564 | 1942 | 1942 | Pardon My Stripes             | Pardon My Stripes             | Auer, John H.        | John H. Auer        | tt0035174 |
| 1745342806 | 2004 | 2004 | Sideways                      | Sideways                      | Payne, Alexander     | Alexander Payne     | tt0375063 |
| 1746555274 | 1957 | 1957 | Calypso Heat Wave             | Calypso Heat Wave             | Sears, Fred F.       | Fred F. Sears       | tt0050222 |
| 1746585079 | 1930 | 1930 | Vengeance                     | Vengeance                     | Mayo, Archie         | Archie Mayo         | tt0021515 |
| 1746577285 | 1951 | 1951 | Rodeo King and the Senorita   | Rodeo King and the Senorita   | Ford, Philip         | Philip Ford         | tt0043977 |
| 1746563754 | 1952 | 1952 | Wagons West                   | Wagons West                   | Beebe, Ford          | Ford Beebe          | tt0045306 |
| 1746559937 | 1965 | 1965 | None but the Brave            | None But the Brave            | Sinatra, Frank       | Frank Sinatra       | tt0059518 |
| 1746408633 | 1992 | 1992 | Class Act                     | Class Act                     | Miller, Randall      | Randall Miller      | tt0103978 |
| 1746565958 | 1953 | 1953 | Hot News                      | Hot News                      | Bernds, Edward       | Edward Berndts      | tt0045885 |
| 1746582739 | 1937 | 1937 | The Mighty Treve              | The Mighty Treve              | Collins, Lewis D.    | Lewis D. Collins    | tt0029243 |
| 1746500855 | 1915 | 1915 | Young Romance                 | Young Romance                 | Melford, George H.   | George Melford      | tt0006327 |
| 1746420781 | 1997 | 1997 | My Best Friend's Wedding      | My Best Friend's Wedding      | Hogan, P. J.         | P.J. Hogan          | tt0119738 |
| 1746416093 | 1917 | 1917 | The Little Orphan             | The Little Orphan             | Conway, Jack         | Jack Conway         | tt0008193 |
| 1746409688 | 1989 | 1989 | Field of Dreams               | Field of Dreams               | Robinson, Phil Alden | Phil Alden Robinson | tt0097351 |
| 1746509249 | 1926 | 1926 | Coming an' Going              | Coming an' Going              | Thorpe, Richard      | Richard Thorpe      | tt0016737 |
| 1746208156 | 1968 | 1968 | Night of the Living Dead      | Night of the Living Dead      | Romero, George A.    | George A. Romero    | tt0063350 |
| 1746515028 | 1916 | 1916 | Her Surrender                 | Her Surrender                 | Abramson, Ivan       | Ivan Abramson       | tt0157749 |
| 1746424582 | 1941 | 1941 | Desperate Cargo               | Desperate Cargo               | Beaudine, William    | William Beaudine    | tt0033526 |
| 1746523951 | 1927 | 1926 | Butterflies in the Rain       | Butterflies in the Rain       | Sloman, Edward       | Edward Sloman       | tt0016699 |
| 1746218926 | 1977 | 1977 | Mr. Billion                   | Mr. Billion                   | Kaplan, Jonathan     | Jonathan Kaplan     | tt0076417 |
| 1746582364 | 1951 | 1951 | The Secret of Convict Lake    | The Secret of Convict Lake    | Gordon, Michael      | Michael Gordon      | tt0044015 |
| 1746410173 | 1989 | 1989 | Kill Me Again                 | Kill Me Again                 | Dahl, John           | John Dahl           | tt0097662 |
| 1746455087 | 2000 | 2000 | The Legend of Bagger Vance    | The Legend of Bagger Vance    | Redford, Robert      | Robert Redford      | tt0146984 |
| 1746453837 | 1942 | 1942 | The Boss of Big Town          | The Boss of Big Town          | Dreifuss, Arthur     | Arthur Dreifuss     | tt0035694 |
| 1746487504 | 1919 | 1919 | A Favor to a Friend           | A Favor to a Friend           | Ince, John           | John Ince           | tt0190393 |
| 1746435731 | 1940 | 1940 | Drums of the Desert           | Drums of the Desert           | Waggner, George      | George Waggner      | tt0032421 |

|                   |             |             |                                      |                                       |                                     |                       |                  |
|-------------------|-------------|-------------|--------------------------------------|---------------------------------------|-------------------------------------|-----------------------|------------------|
| 1746455203        | 1999        | 1999        | Go                                   | Go                                    | Liman, Doug                         | Doug Liman            | tt0139239        |
| 1745342635        | 2009        | 2009        | Couples Retreat                      | Couples Retreat                       | Billingsley, Peter                  | Peter Billingsley     | tt1078940        |
| 1746520041        | 1949        | 1949        | One Last Fling                       | One Last Fling                        | Godfrey, Peter                      | Peter Godfrey         | tt0041718        |
| 1746584111        | 1937        | 1937        | Fight for Your Lady                  | Fight for Your Lady                   | Stoloff, Ben                        | Benjamin Stoloff      | tt0028868        |
| 1746562248        | 1956        | 1956        | That Certain Feeling                 | That Certain Feeling                  | Panama, Norman; Frank, Melvin       | Melvin Frank          | tt0049841        |
| 1746513832        | 1915        | 1915        | Rosemary                             | Rosemary                              | Bowman, William; Balshofer, Fred J. | Fred J. Balshofer     | tt0005980        |
| 1746581601        | 1951        | 1951        | China Corsair                        | China Corsair                         | Nazzaro, Ray                        | Ray Nazarro           | tt0043403        |
| 1746485316        | 1918        | 1918        | Bound in Morocco                     | Bound in Morocco                      | Dwan, Allan                         | Allan Dwan            | tt0008915        |
| 1746574012        | 1957        | 1957        | Fear Strikes Out                     | Fear Strikes Out                      | Mulligan, Robert                    | Robert Mulligan       | tt0050383        |
| 1746572218        | 1932        | 1932        | Beauty and the Boss                  | Beauty and the Boss                   | Del Ruth, Roy                       | Roy Del Ruth          | tt0021647        |
| 1769970493        | 1967        | 1967        | Cool It, Baby                        | Cool It Baby                          | Champion, Lou                       | Lou Campa             | tt0061513        |
| 1746578426        | 1961        | 1961        | Love in a Goldfish Bowl              | Love in a Goldfish Bowl               | Sher, Jack                          | Jack Sher             | tt0055099        |
| 1746496880        | 1919        | 1919        | Todd of the Times                    | Todd of the Times                     | Howe, Eliot                         | Eliot Howe            | tt0010786        |
| 1746422928        | 1998        | 1997        | Suicide Kings                        | Suicide Kings                         | O'Fallon, Peter                     | Peter O'Fallon        | tt0120241        |
| 1745293561        | 2005        | 2005        | A Lot Like Love                      | A Lot Like Love                       | Cole, Nigel                         | Nigel Cole            | tt0391304        |
| 1746578789        | 1951        | 1951        | Ghost Chasers                        | Ghost Chasers                         | Beaudine, William                   | William Beaudine      | tt0043585        |
| 1746565894        | 1953        | 1953        | South Sea Woman                      | South Sea Woman                       | Lubin, Arthur                       | Arthur Lubin          | tt0046348        |
| 1769970756        | 1912        | 1912        | Kings of the Forest                  | Kings of the Forest                   |                                     | Colin Campbell        | tt0002293        |
| 1746583038        | 1939        | 1939        | Way Down South                       | Way Down South                        |                                     | Leslie Goodwins       | tt0032114        |
| 1746508938        | 1925        | 1925        | Don't                                | Don't                                 | Vorhaus, Bernard                    | Leslie Goodwins       | tt0032114        |
| 1746578723        | 1950        | 1950        | The Savage Horde                     | The Savage Horde                      | Goulding, Alf                       | Alfred J. Goulding    | tt0015761        |
| 1746512607        | 1915        | 1915        | The Failure                          | The Failure                           | Kane, Joseph                        | Joseph Kane           | tt0042927        |
| 1746500139        | 1949        | 1949        | It Happens Every Spring              | It Happens Every Spring               | Cabanne, William Christy            | Walter Edwards        | tt0447034        |
| 1746530720        | 1949        | 1949        | Flame of Youth                       | Flame of Youth                        | Bacon, Lloyd                        | Lloyd Bacon           | tt0041514        |
| 1746474806        | 1945        | 1945        | She Wouldn't Say Yes                 | She Wouldn't Say Yes                  | Springsteen, R. G.                  | R.G. Springsteen      | tt0041371        |
| 1746409223        | 1991        | 1991        | Switch                               | Switch                                | Hall, Alexander                     | Alexander Hall        | tt0038084        |
| 1746513614        | 1915        | 1915        | Her Career                           | Her Career                            | Edwards, Blake                      | Blake Edwards         | tt0103016        |
| 1745302450        | 2006        | 2006        | X-Men: The Last Stand                | X Men: The Last Stand                 | King, Burton L.                     | Burton L. King        | tt1275647        |
| 1746584336        | 1939        | 1939        | The Saint Strikes Back               | The Saint Strikes Back                | Ratner, Brett                       | Brett Ratner          | tt00376994       |
| 1746559898        | 1965        | 1965        | Beach Blanket Bingo                  | Beach Blanket Bingo                   | Farrow, John                        | John Farrow           | tt0031890        |
| 1746419616        | 1994        | 1994        | Renaissance Man                      | Renaissance Man                       | Asher, William                      | William Asher         | tt0058953        |
| 1746577813        | 1935        | 1935        | Once in a Blue Moon                  | Once in a Blue Moon                   | Marshall, Penny                     | Penny Marshall        | tt0110971        |
| <b>1746570311</b> | <b>1952</b> | <b>1952</b> | <b>Beware, My Lovely</b>             | <b>Beware, My Lovely</b>              | Hecht, Ben; MacArthur, Charles      | Ben Hecht             | tt0028060        |
| 1746569905        | 1959        | 1959        | The Young Philadelphians             | The Young Philadelphians              | <b>Horner, Harry</b>                | <b>Harry Horner</b>   | <b>tt0044417</b> |
| 1745358501        | 2008        | 2008        | Another Gay Sequel: Gays Gone Wild!  | Another Gay Sequel: Gays Gone Wild!   | Sherman, Vincent                    | Vincent Sherman       | tt0053462        |
| 1746234453        | 1968        | 1968        | Stay Away, Joe                       | Stay Away, Joe                        | Stephens, Todd                      | Todd Stephens         | tt1051981        |
| 1746571742        | 1932        | 1932        | Air Mail                             | Air Mail                              | Tewksbury, Peter                    | Peter Tewksbury       | tt0063643        |
| 1746583825        | 1930        | 1930        | Fighting Thru; or California in 1878 | Fighting Thru; or, California in 1878 | Ford, John                          | John Ford             | tt0022615        |
| 1746498685        | 1920        | 1920        | The Dwelling Place of Light          | The Dwelling Place of Light           | Nigh, William                       | William Nigh          | tt0020884        |
| 1745302586        | 2004        | 2004        | The 24th Day                         | The 24th Day                          | Conway, Jack                        | Jack Conway           | tt0011141        |
| 1746563183        | 1952        | 1952        | Aaron Slick from Punkin Crick        | Aaron Slick from Punkin Crick         | Piccirillo, Tony                    | Tony Piccirillo       | tt0246404        |
| 1746436135        | 1943        | 1943        | California Joe                       | California Joe                        | Binyon, Claude                      | Claude Binyon         | tt0044319        |
| 1746439751        | 2000        | 2000        | Big Momma's House                    | Big Momma's House                     | Bennet, Spencer                     | Spencer Gordon Bennet | tt0036687        |
| 1746393622        | 1984        | 1984        | Garbo Talks                          | Garbo Talks                           | Gosnell, Raja                       | Raja Gosnell          | tt0208003        |
| 1746435870        | 1997        | 1997        | Wonderland                           | Wonderland                            | Lumet, Sidney                       | Sidney Lumet          | tt0087313        |
| 1746509465        | 1925        | 1925        | Chickie                              | Chickie                               | O'Hagan, John                       | John O'Hagan          | tt0120529        |
| 1746582018        | 1928        | 1928        | Stop That Man!                       | Stop That Man!                        | Dillon, John Francis                | John Francis Dillon   | tt0015679        |
| 1746423737        | 1999        | 1999        | True Crime                           | True Crime                            | Ross, Nat                           | Nat Ross              | tt0019426        |
| 1746504785        | 1918        | 1918        | A Desert Wooing                      | A Desert Wooing                       | Eastwood, Clint                     | Clint Eastwood        | tt0139668        |
| 1746577524        | 1933        | 1933        | Charlie Chan's Greatest Case         | Charlie Chan's Greatest Case          | Storm, Jerome                       | Jerome Storm          | tt0184390        |
| 1746200214        | 1969        | 1969        | American Revolution 2                | American Revolution 2                 | MacFadden, Hamilton                 | Hamilton MacFadden    | tt0023881        |
| 1746569920        | 1957        | 1957        | Sierra Stranger                      | Sierra Stranger                       | Gray, Mike                          | Howard Alk            | tt0477558        |
| 1746520267        | 1950        | 1950        | Hi-Jacked                            | Hi Jacked                             | Sholem, Lee                         | Lee Sholem            | tt0050970        |
| 1746524493        | 1927        | 1927        | Hey Hey Cowboy                       | Hey! Hey! Cowboy                      | Newfield, Sam                       | Sam Newfield          | tt0042551        |
| 1746584447        | 1930        | 1930        | Dixiana                              | Dixiana                               | Reynolds, Lynn                      | Edward Laemmle        | tt0017989        |
| 1746420772        | 1994        | 1994        | I.Q.                                 | I.Q.                                  | Reed, Luther                        | Luther Reed           | tt0020828        |
| 1746514829        | 1915        | 1915        | Captain Courtesy                     | Captain Courtesy                      | Schepisi, Fred                      | Fred Schepisi         | tt0110099        |
|                   |             |             |                                      |                                       | Weber, Lois; Smalley, Phillips      | Phillips Smalley      | tt0005056        |

|                   |             |             |                                    |                                    |                                |                           |                  |          |
|-------------------|-------------|-------------|------------------------------------|------------------------------------|--------------------------------|---------------------------|------------------|----------|
| 1746216786        | 1966        | 1966        | Way ... Way Out                    | Way... Way Out                     | Douglas, Gordon                | Gordon Douglas            | tt0061173        |          |
| 1746491828        | 1948        | 1948        | Rachel and the Stranger            | Rachel and the Stranger            | Foster, Norman                 | Norman Foster             | tt0040720        |          |
| 1746465301        | 1947        | 1946        | Duel in the Sun                    | Duel in the Sun                    | Vidor, King; Dieterle, William | King Vidor                | tt0038499        |          |
| 1746424615        | 1942        | 1942        | Cairo                              | Cairo                              | Van Dyke, W. S.                | W.S. Van Dyke             | tt0034565        |          |
| 1746582879        | 1939        | 1939        | Young Mr. Lincoln                  | Young Mr. Lincoln                  | Ford, John                     | John Ford                 | tt0032155        |          |
| 1746420821        | 1940        | 1940        | Hold That Woman!                   | Hold That Woman!                   | Scott, Sherman                 | Sam Newfield              | tt0032602        |          |
| 1746482892        | 1917        | 1917        | Men of the Desert                  | Men of the Desert                  | Van Dyke, W. S.                | W.S. Van Dyke             | tt0008287        |          |
| 1745396208        | 2008        | 2008        | Four Christmases                   | Four Christmases                   | Gordon, Seth                   | Seth Gordon               | tt0369436        |          |
| 1769969425        | 1911        | 1911        | The Rose and the Dagger            | The Rose and the Dagger            | Porter, Edwin S.               | Edwin S. Porter           | tt0402474        |          |
| 1746500249        | 1926        | 1926        | High Steppers                      | High Steppers                      | Carewe, Edwin                  | Edwin Carewe              | tt0016967        |          |
| 1746512762        | 1915        | 1915        | Black Fear                         | Black Fear                         | Noble, John W.                 | John W. Noble             | tt0004975        |          |
| 1745303011        | 2007        | 2007        | Rocket Science                     | Rocket Science                     | Blitz, Jeffrey                 | Jeffrey Blitz             | tt0477078        |          |
| 1746582139        | 1929        | 1929        | The Love Doctor                    | The Love Doctor                    | Brown, Melville                | Melville W. Brown         | tt0020111        |          |
| <b>1745375302</b> | <b>2010</b> | <b>2009</b> | <b>City Island</b>                 | <b>City Island</b>                 | <b>De Felitta, Raymond</b>     | <b>Raymond De Felitta</b> | <b>tt1174730</b> | <b>1</b> |
| 1746408635        | 1986        | 1986        | Thrashin'                          | Thrashin'                          | Winters, David                 | David Winters             | tt0092085        |          |
| 1746438190        | 1943        | 1943        | Divide and Conquer                 | Divide and Conquer                 |                                | Frank Capra               | tt0173769        |          |
| 1746568203        | 1932        | 1932        | The Galloping Kid                  | The Galloping Kid                  | Emmet, Robert                  | Robert Emmett Tansey      | tt0022925        |          |
| 1746509261        | 1925        | 1925        | Seven Days                         | Seven Days                         | Sidney, Scott                  | Scott Sidney              | tt0017368        |          |
| 1746566910        | 1952        | 1952        | Montana Incident                   | Montana Incident                   | Collins, Lewis                 | Lewis D. Collins          | tt0044920        |          |
| 1745340180        | 2003        | 2003        | Basic                              | Basic                              | McTiernan, John                | John McTiernan            | tt0264395        |          |
| 1746420879        | 1994        | 1994        | A Passion to Kill                  | A Passion to Kill                  | King, Rick                     | Rick King                 | tt0110791        |          |
| 1746585355        | 1930        | 1930        | This Mad World                     | This Mad World                     | de Mille, William              | William C. de Mille       | tt0021468        |          |
| 1746455658        | 1996        | 1996        | Mother Night                       | Mother Night                       | Gordon, Keith                  | Keith Gordon              | tt0117093        |          |
| <b>1746410808</b> | <b>1988</b> | <b>1988</b> | <b>Waxwork</b>                     | <b>Waxwork</b>                     | <b>Hickox, Anthony</b>         | <b>Anthony Hickox</b>     | <b>tt0096426</b> | <b>1</b> |
| 1746574236        | 1962        | 1962        | The Wild Westerners                | The Wild Westerners                | Rudolph, Oscar                 | Oscar Rudolph             | tt0056695        |          |
| 1746508764        | 1924        | 1924        | The Spitfire                       | The Spitfire                       | Cabanne, William Christy       | Christy Cabanne           | tt0015358        |          |
| 1746559914        | 1965        | 1965        | The Legend of Blood Mountain       | The Legend of Blood Mountain       | Cramer, Massey                 | Massey Cramer             | tt0229528        |          |
| 1746515039        | 1915        | 1915        | The Little Dutch Girl              | The Little Dutch Girl              | Chautard, Emile                | Emile Chautard            | tt0035916        |          |
| 1746520379        | 1926        | 1926        | Why Girls Go Back Home             | Why Girls Go Back Home             | Flood, James                   | James Flood               | tt0017555        |          |
| 1746524211        | 1915        | 1915        | Not Guilty                         | Not Guilty                         | Golden, Joseph                 | Joseph A. Golden          | tt0005816        |          |
| 1746211095        | 1970        | 1970        | Alex in Wonderland                 | Alex in Wonderland                 | Mazursky, Paul                 | Paul Mazursky             | tt0065380        |          |
| 1746435264        | 1943        | 1943        | The Gang's All Here                | The Gang's All Here                | Berkeley, Busby                | Busby Berkeley            | tt0035916        |          |
| 1746570236        | 1934        | 1934        | The Affairs of Cellini             | The Affairs of Cellini             | La Cava, Gregory               | Gregory La Cava           | tt0024816        |          |
| 1746475502        | 1947        | 1947        | On the Old Spanish Trail           | On the Old Spanish Trail           | Witney, William                | William Witney            | tt0039678        |          |
| 1746502373        | 1922        | 1922        | Hell's Border                      | Hell's Border                      |                                | Robert McKenzie           | tt0356685        |          |
| 1746520176        | 1926        | 1926        | The Call of the Wilderness         | The Call of the Wilderness         | Nelson, Jack                   | Jack Nelson               | tt0016703        |          |
| 1746562072        | 1953        | 1953        | Gun Belt                           | Gun Belt                           | Nazarro, Ray                   | Ray Nazarro               | tt0045845        |          |
| 1746508996        | 1948        | 1948        | The Far Frontier                   | The Far Frontier                   | Witney, William                | William Witney            | tt0041347        |          |
| 1746567457        | 1933        | 1933        | The House on 56th Street           | The House on 56th Street           | Florey, Robert                 | Robert Florey             | tt0024144        |          |
| 1746393384        | 1981        | 1981        | Galaxy of Terror                   | Galaxy of Terror                   | Clark, B. D.                   | Bruce D. Clark            | tt0082431        |          |
| 1746501945        | 1916        | 1916        | The Little Shepherd of Bargain Row | The Little Shepherd of Bargain Row | Wright, Fred E.                | Fred E. Wright            | tt0163063        |          |
| 1745339885        | 2003        | 2003        | Just Married                       | Just Married                       | Levy, Shawn                    | Shawn Levy                | tt0305711        |          |
| 1746503922        | 1919        | 1919        | Destiny                            | Destiny                            | Sturgeon, Rollin S.            | Rollin S. Sturgeon        | tt0010064        |          |
| 1746271754        | 1980        | 1980        | The Black Marble                   | The Black Marble                   | Becker, Harold                 | Harold Becker             | tt0080442        |          |
| 1746508087        | 1950        | 1950        | The Happy Years                    | The Happy Years                    | Wellman, William A.            | William A. Wellman        | tt0042542        |          |
| 1746424393        | 1942        | 1942        | Police Bullets                     | Police Bullets                     | Yarbrough, Jean                | Jean Yarbrough            | tt0035199        |          |
| 1746530738        | 1950        | 1950        | Kiss Tomorrow Goodbye              | Kiss Tomorrow Goodbye              | Douglas, Gordon                | Gordon Douglas            | tt0042648        |          |
| 1746475957        | 1947        | 1947        | Little Mister Jim                  | Little Mister Jim                  | Zinnemann, Fred                | Fred Zinnemann            | tt0038697        |          |
| 1746420393        | 1993        | 1993        | The Fugitive                       | The Fugitive                       | Davis, Andrew                  | Andrew Davis              | tt0106977        |          |
| 1746419373        | 1993        | 1993        | Leprechaun                         | Leprechaun                         | Jones, Mark                    | Mark Jones                | tt0107387        |          |
| 1746438164        | 1944        | 1944        | Firebrands of Arizona              | Firebrands of Arizona              | Selander, Lesley               | Lesley Selander           | tt0036827        |          |
| 1746585015        | 1940        | 1940        | The Great McGinty                  | The Great McGinty                  | Sturges, Preston               | Preston Sturges           | tt0032554        |          |
| 1746563755        | 1952        | 1952        | Return of the Texan                | Return of the Texan                | Daves, Delmer                  | Delmer Daves              | tt0045083        |          |
| 1746571347        | 1952        | 1952        | No Room for the Groom              | No Room for the Groom              | Sirk, Douglas                  | Douglas Sirk              | tt0044970        |          |
| 1746580770        | 1939        | 1939        | Coast Guard                        | Coast Guard                        | Ludwig, Edward                 | Edward Ludwig             | tt0031163        |          |
| 1746491823        | 1944        | 1944        | Riding West                        | Riding West                        | Berke, William                 | William Berke             | tt0037226        |          |
| 1746583166        | 1936        | 1936        | Red Lights Ahead                   | Red Lights Ahead                   | Reed, Roland D.                | Roland D. Reed            | tt0029472        |          |

|                   |             |             |                               |                               |                         |                      |                  |
|-------------------|-------------|-------------|-------------------------------|-------------------------------|-------------------------|----------------------|------------------|
| 1746582860        | 1936        | 1936        | The Princess Comes Across     | The Princess Comes Across     | Howard, William K.      | William K. Howard    | tt0028138        |
| 1746560937        | 1965        | 1965        | Beach Ball                    | Beach Ball                    | Weinrib, Lennie         | Lennie Weinrib       | tt0058952        |
| 1746500130        | 1948        | 1948        | Silver River                  | Silver River                  | Walsh, Raoul            | Raoul Walsh          | tt0040789        |
| 1746532433        | 1927        | 1927        | Women Love Diamonds           | Women Love Diamonds           | Goulding, Edmund        | Edmund Goulding      | tt0018595        |
| 1746504739        | 1917        | 1917        | The Adopted Son               | The Adopted Son               | Brabin, Charles         | Charles Brabin       | tt0007612        |
| 1746501257        | 1910        | 1910        | The Purgation                 | The Purgation                 | Griffith, D. W.         | D. W. Griffith       | tt0001369        |
| 1746520683        | 1950        | 1950        | Cassino to Korea              | Cassino to Korea              | Genock, Edward P.       | Eugene Genock        | tt0042319        |
| 1746562034        | 1955        | 1955        | The Man from Laramie          | The Man from Laramie          | Mann, Anthony           | Anthony Mann         | tt0048342        |
| 1746509581        | 1925        | 1925        | The Wild Bull's Lair          | The Wild Bull's Lair          | Andrews, Del            | Del Andrews          | tt0179532        |
| 1769970555        | 1966        | 1966        | Heat of Madness               | Heat of Madness               | Wuest, Harry            | Harry Wuest          | tt0219757        |
| 1746486210        | 1918        | 1918        | The Love Net                  | The Love Net                  | Johnson, Tefft          | Tefft Johnson        | tt0010398        |
| 1746476208        | 1948        | 1948        | A Song Is Born                | A Song Is Born                | Hawks, Howard           | Howard Hawks         | tt0040820        |
| 1746584178        | 1940        | 1940        | Phantom of Chinatown          | Phantom of Chinatown          | Rosen, Phil             | Phil Rosen           | tt0032903        |
| 1746565063        | 1932        | 1932        | The Forty Niners              | The Forty Niners              | McCarthy, John P.       | John P. McCarthy     | tt0022908        |
| 1745293795        | 2007        | 2007        | 30 Days of Night              | 30 Days of Night              | Slade, David            | David Slade          | tt0389722        |
| 1746498494        | 1921        | 1921        | Love's Redemption             | Love's Redemption             | Parker, Albert          | Eugene V. Brewster   | tt0333835        |
| 1746500150        | 1946        | 1946        | Driftin' River                | Driftin' River                | Tansey, Robert Emmett   | Robert Emmett Tansey | tt0038495        |
| 1746422177        | 1998        | 1998        | The Newton Boys               | The Newton Boys               | Linklater, Richard      | Richard Linklater    | tt0120769        |
| 1746562122        | 1955        | 1955        | Man Without a Star            | Man Without a Star            | Vidor, King             | King Vidor           | tt0048340        |
| 1746509182        | 1924        | 1924        | The Battling Orioles          | Battling Orioles              | Wilde, Ted; Guiol, Fred | Fred Guiol           | tt0014701        |
| 1746514390        | 1916        | 1916        | The Saleslady                 | The Saleslady                 | Thomson, Frederick A.   | Frederick A. Thomson | tt0007282        |
| 1746409114        | 1983        | 1982        | The King of Comedy            | The King of Comedy            | Scorsese, Martin        | Martin Scorsese      | tt0085794        |
| 1746520398        | 1926        | 1926        | The Winning of Barbara Worth  | The Winning of Barbara Worth  | King, Henry             | Henry King           | tt0017567        |
| 1746454670        | 1946        | 1946        | House of Horrors              | House of Horrors              | Yarbrough, Jean         | Jean Yarbrough       | tt0038621        |
| 1746454695        | 1941        | 1941        | Model Wife                    | Model Wife                    | Jason, Leigh            | Leigh Jason          | tt0033915        |
| 1746500618        | 1926        | 1926        | The Flame of the Yukon        | The Flame of the Yukon        | Melford, George         | George Melford       | tt0016678        |
| 1746569817        | 1955        | 1955        | I Died a Thousand Times       | I Died a Thousand Times       | Heisler, Stuart         | Stuart Heisler       | tt0048190        |
| 1746524111        | 1913        | 1913        | The Lure of New York          | The Lure of New York          |                         | George K. Rolands    | tt0003098        |
| 1746408717        | 1987        | 1987        | Beyond Therapy                | Beyond Therapy                | Altman, Robert          | Robert Altman        | tt0092646        |
| 1746424197        | 1941        | 1941        | Doomed Caravan                | Doomed Caravan                | Selander, Lesley        | Lesley Selander      | tt0033546        |
| 1746573768        | 1959        | 1959        | A Summer Place                | A Summer Place                | Daves, Delmer           | Delmer Daves         | tt0053320        |
| 1746584227        | 1937        | 1937        | Forty Naughty Girls           | Forty Naughty Girls           | Cline, Edward           | Edward F. Cline      | tt0028891        |
| 1746582466        | 1936        | 1936        | Red River Valley              | Red River Valley              | Eason, B. Reeves        | B. Reeves Eason      | tt0028163        |
| 1746394175        | 1987        | 1987        | Jaws The Revenge              | Jaws: The Revenge             | Sargent, Joseph         | Joseph Sargent       | tt0093300        |
| 1746574252        | 1962        | 1962        | Night of Evil                 | Night of Evil                 | Galbreath, Richard      | Richard Galbreath    | tt0056278        |
| 1745374987        | 2008        | 2008        | Step Up 2 the Streets         | Step Up 2: The Streets        | Chu, Jon M.             | Jon M. Chu           | tt1023481        |
| 1746503705        | 1920        | 1920        | Just Out of College           | Just Out of College           | Green, Alfred           | Alfred E. Green      | tt0012340        |
| 1746577324        | 1962        | 1962        | The Creation of the Humanoids | The Creation of the Humanoids | Barry, Wesley E.        | Wesley Barry         | tt0055872        |
| 1746580640        | 1935        | 1935        | The Phantom Cowboy            | The Phantom Cowboy            | Horner, Robert J.       | Robert J. Horner     | tt0232307        |
| 1746520052        | 1925        | 1926        | The Grey Vulture              | The Grey Vulture              | Sheldon, Forrest K.     | Forrest Sheldon      | tt0132195        |
| 1746532820        | 1923        | 1923        | Out of Luck                   | Out of Luck                   | Sedgwick, Edward        | Edward Sedgwick      | tt0014343        |
| 1746584869        | 1939        | 1939        | Law of the Pampas             | Law of the Pampas             | Watt, Nate              | Nate Watt            | tt0031557        |
| 1746465229        | 1944        | 1944        | Land of the Outlaws           | Land of the Outlaws           | Hillyer, Lambert        | Lambert Hillyer      | tt0037004        |
| 1746569537        | 1956        | 1956        | Congo Crossing                | Congo Crossing                | Pevney, Joseph          | Joseph Pevney        | tt0049091        |
| 1746508075        | 1927        | 1927        | The Sonora Kid                | The Sonora Kid                | De Lacy, Robert         | Robert De Lacey      | tt0018427        |
| <b>1746474805</b> | <b>1946</b> | <b>1946</b> | <b>From This Day Forward</b>  | <b>From This Day Forward</b>  | <b>Berry, John</b>      | <b>John Berry</b>    | <b>tt0038537</b> |
| 1746570189        | 1933        | 1933        | Face in the Sky               | Face in the Sky               | Lachman, Harry          | Harry Lachman        | tt0023998        |
| 1746394240        | 1981        | 1981        | Polyester                     | Polyester                     | Waters, John            | John Waters          | tt0082926        |
| 1746573857        | 1958        | 1958        | Girl in the Woods             | Girl in the Woods             | Gries, Tom              | Tom Gries            | tt0051660        |
| 1746486816        | 1917        | 1917        | Heart and Soul                | Heart and Soul                | Edwards, J. Gordon      | J. Gordon Edwards    | tt0008058        |
| 1746573884        | 1958        | 1958        | Machete                       | Machete                       | Neumann, Kurt           | Kurt Neumann         | tt0051886        |
| 1746523992        | 1914        | 1914        | Manon Lescaut                 | Manon Lescaut                 | Winslow, Herbert Hall   | Herbert Hall Winslow | tt0004303        |
| 1746584282        | 1938        | 1938        | Titans of the Deep            | Titans of the Deep            | Barton, Otis            | Otis Barton          | tt0293956        |
| 1746574377        | 1959        | 1958        | The Buccaneer                 | The Buccaneer                 | Quinn, Anthony          | Anthony Quinn        | tt0051436        |
| 1746574488        | 1934        | 1934        | Murder in the Clouds          | Murder in the Clouds          | Lederman, D. Ross       | D. Ross Lederman     | tt0025530        |
| 1746436688        | 1941        | 1941        | Lady Be Good                  | Lady Be Good                  | McLeod, Norman Z.       | Norman Z. McLeod     | tt0033803        |
| 1746410895        | 1994        | 1994        | Clifford                      | Clifford                      | Flaherty, Paul          | Paul Flaherty        | tt0109447        |



|            |      |      |                             |                             |                                |                                     |           |
|------------|------|------|-----------------------------|-----------------------------|--------------------------------|-------------------------------------|-----------|
| 1746475666 | 1946 | 1946 | The Show-Off                | The Show Off                | Beaumont, Harry                | Harry Beaumont                      | tt0038938 |
| 1746581876 | 1929 | 1929 | The Big Diamond Robbery     | The Big Diamond Robbery     | Forde, Eugene                  | Eugene Forde                        | tt0019689 |
| 1746584985 | 1940 | 1940 | Chasing Trouble             | Chasing Trouble             | Bretherton, Howard             | Howard Bretherton                   | tt0032329 |
| 1746583829 | 1931 | 1931 | Rider of the Plains         | Rider of the Plains         | McCarthy, J. P.                | John P. McCarthy                    | tt0022310 |
| 1746394762 | 1984 | 1984 | Runaway                     | Runaway                     | Crichton, Michael              | Michael Crichton                    | tt0088024 |
| 1746234970 | 1967 | 1967 | Tobruk                      | Tobruk                      | Hiller, Arthur                 | Arthur Hiller                       | tt0062377 |
| 1746582696 | 1937 | 1937 | The Game That Kills         | The Game That Kills         | Lederman, D. Ross              | D. Ross Lederman                    | tt0028915 |
| 1746503539 | 1921 | 1921 | Love Never Dies             | Love Never Dies             | Vidor, King                    | King Vidor                          | tt0012409 |
| 1746584239 | 1935 | 1935 | Superspeed                  | Super Speed                 | Hillyer, Lambert               | Lambert Hillyer                     | tt0027060 |
| 1746524746 | 1910 | 1910 | The Ranchman's Feud         | The Ranchman's Feud         |                                | Gilbert M. 'Broncho Billy' Anderson | tt0001374 |
| 1746464764 | 1945 | 1945 | The Cherokee Flash          | The Cherokee Flash          | Carr, Thomas                   | Thomas Carr                         | tt0037590 |
| 1746584953 | 1939 | 1939 | Disputed Passage            | Disputed Passage            | Borzage, Frank                 | Frank Borzage                       | tt0031234 |
| 1745309659 | 2007 | 2007 | Norbit                      | Norbit                      | Robbins, Brian                 | Brian Robbins                       | tt0477051 |
| 1746583919 | 1930 | 1930 | City Girl                   | City Girl                   | Murnau, F. W.                  | F.W. Murnau                         | tt0020768 |
| 1746409111 | 1992 | 1991 | The Hours and Times         | The Hours and Times         |                                | Christopher Munch                   | tt0104448 |
| 1746508012 | 1926 | 1926 | The Dead Line               | The Dead Line               | Nelson, Jack                   | Jack Nelson                         | tt0016771 |
| 1746503723 | 1922 | 1922 | Silver Spurs                | Silver Spurs                | McCarthy, Henry; Meehan, Leo   | Henry McCarty                       | tt0246233 |
| 1769969494 | 1965 | 1965 | Secrets of an Uncover Model | Secrets of an Uncover Model | Seymour, Maurice               | Maurice Seymour                     | tt0291464 |
| 1746580238 | 1938 | 1938 | West of the Santa Fe        | West of the Santa Fe        | Nelson, Sam                    | Sam Nelson                          | tt0132623 |
| 1746583791 | 1929 | 1929 | The Kid's Clever            | The Kid's Clever            | Craft, William James           | William James Craft                 | tt0020058 |
| 1746582185 | 1928 | 1928 | Powder My Back              | Powder My Back              | Del Ruth, Roy                  | Roy Del Ruth                        | tt0019287 |
| 1746582531 | 1938 | 1938 | The Black Bandit            | Black Bandit                | Waggner, George                | George Waggner                      | tt0029917 |
| 1746567441 | 1952 | 1952 | Phone Call from a Stranger  | Phone Call from a Stranger  | Negulesco, Jean                | Jean Negulesco                      | tt0045029 |
| 1769971924 | 1969 | 1969 | Shut Up and Deal            | Shut Up and Deal            | Donne, John                    | Donn Greer                          | tt0257180 |
| 1746580892 | 1938 | 1938 | The Arkansas Traveler       | The Arkansas Traveler       | Santell, Alfred                | Alfred Santell                      | tt0029879 |
| 1746582076 | 1951 | 1951 | Corky of Gasoline Alley     | Corky of Gasoline Alley     | Bernds, Edward                 | Edward Berndts                      | tt0043427 |
| 1746566262 | 1957 | 1957 | The Deadly Mantis           | The Deadly Mantis           | Juran, Nathan                  | Nathan Juran                        | tt0050294 |
| 1746499956 | 1948 | 1948 | Mickey                      | Mickey                      | Murphy, Ralph                  | Ralph Murphy                        | tt0040586 |
| 1746580232 | 1936 | 1935 | Sundown Saunders            | Sundown Saunders            | Bradbury, Robert N.            | Robert N. Bradbury                  | tt0028324 |
| 1746585272 | 1930 | 1930 | Anybody's War               | Anybody's War               | Wallace, Richard               | Richard Wallace                     | tt0020644 |
| 1746416017 | 1917 | 1917 | The Last of the Ingrams     | The Last of the Ingrams     | Edwards, Walter                | Walter Edwards                      | tt0176921 |
| 1746554731 | 1964 | 1964 | The Candidate               | The Candidate               | Angus, Robert                  | Robert Angus                        | tt0057911 |
| 1746465031 | 1944 | 1944 | Mr. Winkle Goes to War      | Mr. Winkle Goes to War      | Green, Alfred E.; Jason, Leigh | Alfred E. Green                     | tt0037095 |
| 1746235032 | 1972 | 1972 | images                      | Images                      | Altman, Robert                 | Robert Altman                       | tt0068732 |
| 1745302963 | 2007 | 2006 | The Last Time               | The Last Time               | Caleo, Michael                 | Michael Caleo                       | tt0469689 |
| 1746514881 | 1915 | 1915 | The Coward                  | The Coward                  | Barker, Reginald               | Reginald Barker                     | tt0005149 |
| 1746569569 | 1954 | 1954 | Top Banana                  | Top Banana                  | Green, Alfred E.               | Alfred E. Green                     | tt0046443 |
| 1746525179 | 1920 | 1920 | Forbidden Trails            | Forbidden Trails            | Dunlap, Scott                  | Scott R. Dunlap                     | tt0011199 |
| 1746569681 | 1953 | 1953 | Torch Song                  | Torch Song                  | Walters, Charles               | Charles Walters                     | tt0046446 |
| 1746438601 | 1942 | 1942 | Men of San Quentin          | Men of San Quentin          | Beaudine, William              | William Beaudine                    | tt0035057 |
| 1746532725 | 1916 | 1916 | Lying Lips                  | Lying Lips                  | Sloman, Edward                 | Edward Sloman                       | tt0006994 |
| 1746578875 | 1963 | 1963 | The Madmen of Mandoras      | The Madmen of Mandoras      | Bradley, David                 | David Bradley                       | tt0057273 |
| 1746509066 | 1924 | 1924 | That Wild West              | That Wild West              | Neitz, Alvin J.                | Alan James                          | tt0015398 |
| 1746455812 | 1999 | 1999 | Dudley Do-Right             | Dudley Do Right             | Wilson, Hugh                   | Hugh Wilson                         | tt0160236 |
| 1746576894 | 1931 | 1931 | Lasca of the Rio Grande     | Lasca of the Rio Grande     | Laemmle, Edward                | Edward Laemmle                      | tt0022053 |
| 1745342657 | 2001 | 2001 | Pootie Tang                 | Pootie Tang                 | C. K., Louis                   | Louis C.K.                          | tt0258038 |
| 1746219807 | 1979 | 1979 | The Evictors                | The Evictors                | Pierce, Charles B.             | Charles B. Pierce                   | tt0079128 |
| 1746500062 | 1924 | 1924 | A Fighting Heart            | A Fighting Heart            | Nelson, Jack                   | Jack Nelson                         | tt0014894 |
| 1745373424 | 2002 | 2002 | The Good Girl               | The Good Girl               | Arteta, Miguel                 | Miguel Arteta                       | tt0279113 |
| 1745373958 | 2002 | 2002 | Clockstoppers               | Clockstoppers               | Frakes, Jonathan               | Jonathan Frakes                     | tt0157472 |
| 1745374564 | 2008 | 2007 | Nobel Son                   | Nobel Son                   | Miller, Randall                | Randall Miller                      | tt0483756 |
| 1746581042 | 1961 | 1961 | Dead to the World           | Dead to the World           | Webster, Nicholas              | Nicholas Webster                    | tt0132915 |
| 1746569588 | 1954 | 1954 | Naked Alibi                 | Naked Alibi                 | Hopper, Jerry                  | Jerry Hopper                        | tt0047263 |
| 1746454374 | 1942 | 1942 | Lost Canyon                 | Lost Canyon                 | Selander, Lesley               | Lesley Selander                     | tt0034996 |
| 1746574015 | 1961 | 1961 | Twenty Plus Two             | Twenty Plus Two             | Newman, Joseph M.              | Joseph M. Newman                    | tt0055552 |
| 1746582378 | 1951 | 1951 | Colorado Ambush             | Colorado Ambush             | Collins, Lewis                 | Lewis D. Collins                    | tt0043423 |
| 1746580556 | 1937 | 1937 | Sweetheart of the Navy      | Sweetheart of the Navy      | Mansfield, Duncan              | Duncan Mansfield                    | tt0029625 |

|            |      |      |                                   |                                   |                                       |                      |           |
|------------|------|------|-----------------------------------|-----------------------------------|---------------------------------------|----------------------|-----------|
| 1746185838 | 1965 | 1965 | Up From the Beach                 | Up from the Beach                 | Parrish, Robert                       | Robert Parrish       | tt0059853 |
| 1746408648 | 1992 | 1992 | The Waterdance                    | The Waterdance                    | Jimenez, Neal ; Steinberg, Michael    | Neal Jimenez         | tt0105789 |
| 1746520034 | 1925 | 1925 | Daughters Who Pay                 | Daughters Who Pay                 | Terwilliger, George                   | George Terwilliger   | tt0015739 |
| 1746520192 | 1926 | 1926 | The Border Whirlwind              | The Border Whirlwind              | McCarthy, John P.                     | John P. McCarthy     | tt0016674 |
| 1746581765 | 1910 | 1910 | The Hall-Room Boys                | The Hall Room Boys                |                                       |                      | tt1373142 |
| 1746464907 | 1944 | 1943 | Government Girl                   | Government Girl                   | Nichols, Dudley                       | Dudley Nichols       | tt0035952 |
| 1746525183 | 1920 | 1920 | Why Women Sin                     | Why Women Sin                     | King, Burton                          | Burton L. King       | tt0203200 |
| 1746577162 | 1961 | 1960 | Five Guns to Tombstone            | Five Guns to Tombstone            | Cahn, Edward L.                       | Edward L. Cahn       | tt0054878 |
| 1746504083 | 1917 | 1917 | The Silent Witness                | The Silent Witness                | Lambart, Captain Harry                | Harry Lambart        | tt0182423 |
| 1745372682 | 2003 | 2003 | Breakfast with Hunter             | Breakfast with Hunter             | Ewing, Wayne                          | Wayne Ewing          | tt0367565 |
| 1746473763 | 1942 | 1942 | Hello Annapolis                   | Hello, Annapolis                  | Barton, Charles                       | Charles Barton       | tt0034840 |
| 1745342626 | 2010 | 2010 | I'm Still Here                    | I'm Still Here                    | Affleck, Casey                        | Casey Affleck        | tt1356864 |
| 1746561043 | 1932 | 1932 | Blonde Venus                      | Blonde Venus                      | Sternberg, Josef von                  | Josef von Sternberg  | tt0022698 |
| 1746570723 | 1934 | 1934 | The Gay Bride                     | The Gay Bride                     | Conway, Jack                          | Jack Conway          | tt0025163 |
| 1746578449 | 1951 | 1951 | People Will Talk                  | People Will Talk                  | Mankiewicz, Joseph L.                 | Joseph L. Mankiewicz | tt0043915 |
| 1746393530 | 1988 | 1988 | Braddock: Missing in Action III   | Braddock: Missing in Action III   | Norris, Aaron                         | Aaron Norris         | tt0094792 |
| 1746497942 | 1917 | 1917 | The Babes in the Woods            | The Babes in the Woods            | Franklin, Chester M.; Franklin, Sidne | Chester M. Franklin  | tt0007669 |
| 1746524189 | 1927 | 1927 | The College Hero                  | The College Hero                  | Lang, Walter                          | Walter Lang          | tt0017766 |
| 1745359020 | 2002 | 2002 | Skins                             | Skins                             | Eyre, Chris                           | Chris Eyre           | tt0284494 |
| 1746509314 | 1926 | 1926 | Oh, What a Night                  | Oh, What a Night!                 | Ingraham, Lloyd                       | Lloyd Ingraham       | tt0017225 |
| 1746582129 | 1928 | 1928 | Code of the Air                   | Code of the Air                   | Hogan, James P.                       | James P. Hogan       | tt0018780 |
| 1746464927 | 1941 | 1941 | The Devil Pays Off                | The Devil Pays Off                | Auer, John H.                         | John H. Auer         | tt0033531 |
| 1746501033 | 1915 | 1915 | Who's Who in Society              | Who's Who in Society              | Fitzmaurice, George                   | George Fitzmaurice   | tt0006285 |
| 1746534780 | 1922 | 1922 | At the Sign of the Jack O'Lantern | At the Sign of the Jack O'Lantern | Ingraham, Lloyd                       | Lloyd Ingraham       | tt0012910 |
| 1746235270 | 1974 | 1974 | Conrack                           | Conrack                           | Ritt, Martin                          | Martin Ritt          | tt0071358 |
| 1746515371 | 1921 | 1921 | The Man Tamer                     | The Man Tamer                     | Harris, Harry B.                      | Harry B. Harris      | tt0012436 |
| 1746583151 | 1940 | 1939 | Gone With the Wind                | Gone with the Wind                | Fleming, Victor; Wood, Sam; Cukor,    | Victor Fleming       | tt0031381 |
| 1746554622 | 1963 | 1963 | The Castilian                     | The Castilian                     | Setó, Javier                          | Javier Setó          | tt0056646 |
| 1746577654 | 1937 | 1937 | Riders of the Dawn                | Riders of the Dawn                | Bradbury, Robert N.                   | Robert N. Bradbury   | tt0029484 |
| 1746500285 | 1950 | 1950 | Arizona Territory                 | Arizona Territory                 | Fox, Wallace W.                       | Wallace Fox          | tt0021617 |
| 1745341837 | 2010 | 2010 | The A-Team                        | The A Team                        | Carnahan, Joe                         | Joe Carnahan         | tt0429493 |
| 1746550004 | 1956 | 1956 | Alexander the Great               | Alexander the Great               | Rossen, Robert; Mussetta, Piero       | Robert Rossen        | tt0048937 |
| 1746465102 | 1944 | 1944 | And the Angels Sing               | And the Angels Sing               | Marshall, George                      | George Marshall      | tt0036600 |
| 1746435155 | 1942 | 1942 | Black Dragons                     | Black Dragons                     | High, William                         | William Nigh         | tt0034521 |
| 1746410806 | 1990 | 1990 | Def by Temptation                 | Def by Temptation                 | Bond, James                           | James Bond III       | tt0099395 |
| 1746577563 | 1935 | 1935 | The Farmer Takes a Wife           | The Farmer Takes a Wife           | Fleming, Victor                       | Victor Fleming       | tt0026338 |
| 1746576718 | 1931 | 1931 | The Public Defender               | The Public Defender               | Ruben, J. Walter                      | J. Walter Ruben      | tt0022285 |
| 1746524826 | 1928 | 1928 | On the Divide                     | On the Divide                     | McGowan, J. P.                        | J.P. McGowan         | tt0144536 |
| 1746574857 | 1938 | 1938 | Blondes at Work                   | Blondes at Work                   | McDonald, Frank                       | Frank McDonald       | tt0029926 |
| 1746582376 | 1950 | 1949 | Conspirator                       | Conspirator                       | Saville, Victor                       | Victor Saville       | tt0041260 |
| 1746487358 | 1918 | 1918 | The Shell Game                    | The Shell Game                    | Baker, George D.                      | George D. Baker      | tt0009606 |
| 1746500681 | 1927 | 1927 | Riding to Fame                    | Riding to Fame                    | Barringer, A. B.                      | Barry Barringer      | tt0124853 |
| 1746573919 | 1962 | 1962 | Varan the Unbelievable            | Varan the Unbelievable            |                                       | Jerry A. Baerwitz    | tt0056648 |
| 1746408450 | 1982 | 1982 | Fast Times at Ridgemont High      | Fast Times at Ridgemont High      | Heckerling, Amy                       | Amy Heckerling       | tt0083929 |
| 1746577057 | 1963 | 1963 | Cattle King                       | Cattle King                       | Garnett, Tay                          | Tay Garnett          | tt0056914 |
| 1746219700 | 1975 | 1975 | The Ultimate Warrior              | The Ultimate Warrior              | Clouse, Robert                        | Robert Clouse        | tt0073835 |
| 1746574712 | 1937 | 1937 | The Great Garrick                 | The Great Garrick                 | Whale, James                          | James Whale          | tt0028953 |
| 1746565965 | 1956 | 1956 | A Strange Adventure               | A Strange Adventure               | Witney, William                       | William Witney       | tt0049804 |
| 1746515833 | 1921 | 1921 | A Midnight Bell                   | A Midnight Bell                   | Ray, Charles                          | Charles Ray          | tt0012458 |
| 1746488022 | 1918 | 1918 | Free and Equal                    | Free and Equal                    | Neill, R. William                     | Roy William Neill    | tt0015839 |
| 1746566279 | 1958 | 1958 | The Lost Missile                  | The Lost Missile                  | Berke, Lester Wm.                     | William Berke        | tt0051881 |
| 1746248592 | 1968 | 1968 | The Detective                     | The Detective                     | Douglas, Gordon                       | Gordon Douglas       | tt0062883 |
| 1746423267 | 1994 | 1994 | The Paper                         | The Paper                         | Howard, Ron                           | Ron Howard           | tt0110771 |
| 1746569819 | 1956 | 1956 | Zanzabuku                         | Zanzabuku                         |                                       | Lewis Cotlow         | tt0166027 |
| 1746580467 | 1938 | 1938 | King of the Newsboys              | King of the Newsboys              | Vorhaus, Bernard                      | Bernard Vorhaus      | tt0030323 |
| 1746438604 | 1940 | 1940 | Trail of the Vigilantes           | Trail of the Vigilantes           | Dwan, Allan                           | Allan Dwan           | tt0033180 |
| 1746580247 | 1938 | 1938 | Three Comrades                    | Three Comrades                    | Borzage, Frank                        | Frank Borzage        | tt0030865 |

|            |      |      |                                     |                                     |                                |                    |           |
|------------|------|------|-------------------------------------|-------------------------------------|--------------------------------|--------------------|-----------|
| 1746501762 | 1917 | 1917 | The Girl Who Won Out                | The Girl Who Won Out                | Moore, Eugene                  | Eugene Moore       | tt0008003 |
| 1746570246 | 1933 | 1933 | Duck Soup                           | Duck Soup                           | McCarey, Leo                   | Leo McCarey        | tt0023969 |
| 1746570062 | 1933 | 1933 | Sucker Money                        | Sucker Money                        | Reid, Dorothy; Shyer, Melville | Dorothy Davenport  | tt0024628 |
| 1746580994 | 1960 | 1960 | Crack in the Mirror                 | Crack in the Mirror                 | Fleischer, Richard             | Richard Fleischer  | tt0053735 |
| 1746419934 | 1993 | 1993 | Wilder Napalm                       | Wilder Napalm                       | Caron, Glenn Gordon            | Glenn Gordon Caron | tt0108569 |
| 1746564296 | 1951 | 1951 | Warpath                             | Warpath                             | Haskin, Byron                  | Byron Haskin       | tt0044196 |
| 1746580741 | 1938 | 1938 | Exposed                             | Exposed                             | Schuster, Harold               | Harold D. Schuster | tt0030112 |
| 1746454617 | 1946 | 1946 | Nocturne                            | Nocturne                            | Marin, Edwin L.                | Edwin L. Marin     | tt0038782 |
| 1746492446 | 1946 | 1946 | A Boy, a Girl and a Dog             | A Boy, a Girl and a Dog             | Kline, Herbert                 | Herbert Kline      | tt0038380 |
| 1745293723 | 2007 | 2007 | Knocked Up                          | Knocked Up                          | Apatow, Judd                   | Judd Apatow        | tt0478311 |
| 1746583362 | 1931 | 1931 | The Millionaire                     | The Millionaire                     | Adolfi, John G.                | John G. Adolfi     | tt0022151 |
| 1746573841 | 1958 | 1958 | Hell's Five Hours                   | Hell's Five Hours                   | Copeland, Jack L.              | Jack L. Copeland   | tt0051714 |
| 1746574700 | 1937 | 1937 | The Hurricane                       | The Hurricane                       | Ford, John                     | John Ford          | tt0029030 |
| 1746563863 | 1951 | 1951 | The Tall Target                     | The Tall Target                     | Mann, Anthony                  | Anthony Mann       | tt0044105 |
| 1745309262 | 2007 | 2007 | Michael Clayton                     | Michael Clayton                     | Gilroy, Tony                   | Tony Gilroy        | tt0465538 |
| 1746570134 | 1953 | 1953 | The Lawless Breed                   | The Lawless Breed                   | Walsh, Raoul                   | Raoul Walsh        | tt0045992 |
| 1746474419 | 1947 | 1947 | Kiss of Death                       | Kiss of Death                       | Hathaway, Henry                | Henry Hathaway     | tt0039536 |
| 1746570886 | 1934 | 1934 | Stamboul Quest                      | Stamboul Quest                      | Wood, Sam                      | Sam Wood           | tt0025828 |
| 1746562204 | 1956 | 1956 | The Cruel Tower                     | The Cruel Tower                     | Landers, Lew                   | Lew Landers        | tt0049109 |
| 1769970438 | 1967 | 1967 | Run Swinger Run!                    | Run Swinger Run!                    | Mahon, Barry                   | Barry Mahon        | tt0147299 |
| 1746394409 | 1984 | 1984 | Police Academy                      | Police Academy                      | Wilson, Hugh                   | Hugh Wilson        | tt0087928 |
| 1746501663 | 1922 | 1922 | Pop Tuttle's Movie Queen            | Pop Tuttle's Movie Queen            | Eddy, Robert                   | Robert Eddy        | tt0889644 |
| 1746436189 | 1991 | 1990 | Cadence                             | Cadence                             | Sheen, Martin                  | Martin Sheen       | tt0101531 |
| 1746455017 | 1995 | 1995 | A Walk in the Clouds                | A Walk in the Clouds                | Arau, Alfonso                  | Alfonso Arau       | tt0114887 |
| 1746500368 | 1926 | 1926 | The Lady From Hell                  | The Lady from Hell                  | Paton, Stuart                  | Stuart Paton       | tt0017055 |
| 1746583353 | 1930 | 1930 | Take the Heir                       | Take the Heir                       | Ingraham, Lloyd                | Lloyd Ingraham     | tt0021448 |
| 1746532469 | 1916 | 1916 | The King's Game                     | The King's Game                     | Miller, Ashley                 | Ashley Miller      | tt0006897 |
| 1746569871 | 1954 | 1954 | The Black Dakotas                   | The Black Dakotas                   | Nazarro, Ray                   | Ray Nazarro        | tt0046783 |
| 1746465076 | 1946 | 1946 | Outlaws of the Plains               | Outlaws of the Plains               | Newfield, Sam                  | Sam Newfield       | tt0038818 |
| 1746464826 | 1946 | 1946 | Criminal Court                      | Criminal Court                      | Wise, Robert                   | Robert Wise        | tt0038434 |
| 1746437584 | 1997 | 1997 | A Simple Wish                       | A Simple Wish                       | Ritchie, Michael               | Michael Ritchie    | tt0120133 |
| 1746561259 | 1932 | 1931 | The Cheyenne Cyclone                | The Cheyenne Cyclone                | Schaeffer, Armand              | Armand Schaefer    | tt0179126 |
| 1746491855 | 1946 | 1946 | Rio Grande Raiders                  | Rio Grande Raiders                  | Carr, Thomas                   | Thomas Carr        | tt0038884 |
| 1746496430 | 1918 | 1917 | The Fall of the Romanoffs           | The Fall of the Romanoffs           | Brenon, Herbert                | Herbert Brenon     | tt0007927 |
| 1746524140 | 1927 | 1927 | Flying Luck                         | Flying Luck                         | Raymaker, Herman C.            | Herman C. Raymaker | tt0017894 |
| 1746486851 | 1919 | 1919 | La Belle Russe                      | La belle Russe                      | Brabin, Charles J.             | Charles Brabin     | tt0009917 |
| 1746504895 | 1918 | 1918 | The Heart of Romance                | The Heart of Romance                | Millarde, Harry                | Harry F. Millarde  | tt0009146 |
| 1746582561 | 1939 | 1939 | Four Girls in White                 | Four Girls in White                 | Simon, S. Sylvan               | S. Sylvan Simon    | tt0031335 |
| 1746508427 | 1925 | 1925 | Black Cyclone                       | Black Cyclone                       | Jackman, Fred                  | Fred Jackman       | tt0015627 |
| 1746524859 | 1916 | 1916 | The Other Side of the Door          | The Other Side of the Door          | Ricketts, Thomas               | Tom Ricketts       | tt0007149 |
| 1746492207 | 1948 | 1948 | Perilous Waters                     | Perilous Waters                     | Bernhard, Jack                 | Jack Bernhard      | tt0039489 |
| 1746435328 | 1992 | 1992 | Final Analysis                      | Final Analysis                      | Joanou, Phil                   | Phil Joanou        | tt0104265 |
| 1746516318 | 1921 | 1921 | The Blot                            | The Blot                            | Weber, Lois                    | Lois Weber         | tt0011979 |
| 1746569813 | 1955 | 1955 | Fort Yuma                           | Fort Yuma                           | Selander, Lesley               | Lesley Selander    | tt0048090 |
| 1746509293 | 1926 | 1926 | The City                            | The City                            | Neill, R. William              | Roy William Neill  | tt0016729 |
| 1746525048 | 1921 | 1921 | Johnny Ring and the Captain's Sword | Johnny Ring and the Captain's Sword | Stevens, Norman L.             | Norman L. Stevens  | tt0135487 |
| 1746573487 | 1910 | 1910 | Cowboy Chivalry                     | Cowboy Chivalry                     |                                |                    | tt1862003 |
| 1746511828 | 1928 | 1928 | Marlie the Killer                   | Marlie the Killer                   | Smith, Noel Mason              | Noel M. Smith      | tt0019145 |
| 1745395789 | 2009 | 2009 | The Stepfather                      | The Stepfather                      | McCormick, Nelson              | Nelson McCormick   | tt0814335 |
| 1745302286 | 2006 | 2006 | Running with Scissors               | Running with Scissors               | Murphy, Ryan                   | Ryan Murphy        | tt0439289 |
| 1746465354 | 1947 | 1947 | The Lost Moment                     | The Lost Moment                     | Gabel, Martin                  | Martin Gabel       | tt0039583 |
| 1769970591 | 1968 | 1968 | Sappho '68                          | Sappho '68                          | Anders, Jan                    | Nick Millard       | tt0257093 |
| 1746583145 | 1938 | 1938 | I'll Give a Million                 | I'll Give a Million                 | Lang, Walter                   | Walter Lang        | tt0030261 |
| 1769976713 | 1929 | 1929 | Post Mortems                        | Post Mortems                        | Pearce, A. Leslie              | Leslie Pearce      | tt0208373 |
| 1746582626 | 1935 | 1935 | The Man on the Flying Trapeze       | Man on the Flying Trapeze           | Bruckman, Clyde                | Clyde Bruckman     | tt0026676 |
| 1746509043 | 1925 | 1925 | That Royle Girl                     | That Royle Girl                     | Griffith, D. W.                | D.W. Griffith      | tt0016420 |
| 1746570064 | 1933 | 1933 | Clear All Wires!                    | Clear All Wires!                    |                                | George W. Hill     | tt0023896 |

|            |      |      |                               |                               |                                   |                    |           |
|------------|------|------|-------------------------------|-------------------------------|-----------------------------------|--------------------|-----------|
| 1746394210 | 1984 | 1984 | C.H.U.D.                      | C.H.U.D.                      | Cheek, Douglas                    | Douglas Cheek      | tt0087015 |
| 1746533030 | 1915 | 1915 | Hypocrites                    | Hypocrites                    | Weber, Lois                       | Lois Weber         | tt0004134 |
| 1746454667 | 1945 | 1945 | Escape in the Fog             | Escape in the Fog             | Boetticher, Oscar                 | Budd Boetticher    | tt0037678 |
| 1746474418 | 1946 | 1946 | Earl Carroll Sketchbook       | Earl Carroll Sketchbook       | Rogell, Albert S.                 | Albert S. Rogell   | tt0038504 |
| 1746514980 | 1923 | 1923 | The Ragged Edge               | The Ragged Edge               | Weight, Harmon                    | F. Harmon Weight   | tt0014392 |
| 1746520427 | 1949 | 1949 | Trouble at Melody Mesa        | Trouble at Melody Mesa        | Connell, W. Merle                 | W. Merle Connell   | tt0127329 |
| 1746513136 | 1923 | 1923 | Driven                        | Driven                        | Brabin, Charles J.                | Charles Brabin     | tt0014004 |
| 1746582215 | 1928 | 1928 | The Foreign Legion            | The Foreign Legion            | Sloman, Edward                    | Edward Sloman      | tt0018905 |
| 1746508090 | 1950 | 1950 | Blue Grass of Kentucky        | Blue Grass of Kentucky        | Beaudine, William                 | William Beaudine   | tt0042264 |
| 1746509551 | 1925 | 1925 | Her Market Value              | Her Market Value              | Powell, Paul                      | Paul Powell        | tt0016960 |
| 1746393269 | 1983 | 1983 | Lone Wolf McQuade             | Lone Wolf McQuade             | Carver, Steve                     | Steve Carver       | tt0085862 |
| 1746572339 | 1931 | 1931 | Captain Applejack             | Captain Applejack             | Henley, Hobart                    | Hobart Henley      | tt0020739 |
| 1746476206 | 1948 | 1948 | Rope                          | Rope                          | Hitchcock, Alfred                 | Alfred Hitchcock   | tt0040746 |
| 1746438614 | 1941 | 1941 | The Pittsburgh Kid            | The Pittsburgh Kid            | Townley, Jack                     | Jack Townley       | tt0034032 |
| 1746577033 | 1951 | 1951 | Quo Vadis                     | Quo Vadis                     | LeRoy, Mervyn                     | Mervyn LeRoy       | tt0043949 |
| 1746210059 | 1970 | 1970 | The Liberation of L. B. Jones | The Liberation of L.B. Jones  | Wyler, William                    | William Wyler      | tt0065979 |
| 1746508182 | 1924 | 1924 | Call of the Mate              | Call of the Mate              | Neitz, Alvin J.                   | Alan James         | tt0014757 |
| 1746424580 | 1943 | 1943 | False Colors                  | False Colors                  | Archainbaud, George               | George Archainbaud | tt0035862 |
| 1746578793 | 1961 | 1961 | The Sin of Mona Kent          | The Sin of Mona Kent          | Hundt, Charles J.                 | Charles J. Hunt    | tt0275682 |
| 1746582522 | 1938 | 1938 | Lawless Valley                | Lawless Valley                | Howard, David                     | David Howard       | tt0030354 |
| 1746573072 | 1910 | 1910 | The Common Enemy              | The Common Enemy              |                                   | Otis Turner        | tt0001157 |
| 1746584543 | 1931 | 1931 | Dance, Fools, Dance           | Dance, Fools, Dance           | Beaumont, Harry                   | Harry Beaumont     | tt0021778 |
| 1746542659 | 1950 | 1950 | The Milkman                   | The Milkman                   | Barton, Charles T.                | Charles Barton     | tt0042733 |
| 1746434966 | 1999 | 1999 | The Matrix                    | The Matrix                    | Wachowski, Andy; Wachowski, Larry | Lana Wachowski     | tt0133093 |
| 1746584099 | 1935 | 1935 | Northern Frontier             | Northern Frontier             | Neufield, Sam                     | Sam Newfield       | tt0026791 |
| 1746584912 | 1940 | 1940 | Comrade X                     | Comrade X                     | Vidor, King                       | King Vidor         | tt0032349 |
| 1746583440 | 1931 | 1931 | Rebound                       | Rebound                       | Griffith, Edward H.               | Edward H. Griffith | tt0022296 |
| 1746582884 | 1936 | 1936 | The House of Secrets          | The House of Secrets          | Reed, Roland D.                   | Roland D. Reed     | tt0029028 |
| 1746454281 | 1998 | 1998 | Permanent Midnight            | Permanent Midnight            | Veloz, David                      | David Veloz        | tt0120788 |
| 1746475269 | 1948 | 1948 | Relentless                    | Relentless                    | Sherman, George                   | George Sherman     | tt0040726 |
| 1746574075 | 1959 | 1959 | The Cosmic Man                | The Cosmic Man                | Greene, Herbert                   | Herbert S. Greene  | tt0052702 |
| 1746464807 | 1940 | 1940 | The Range Busters             | The Range Busters             | Luby, Roy                         | S. Roy Luby        | tt0032971 |
| 1746185708 | 1965 | 1965 | International Smorgasbroad    | International Smorgas Broad   | Mahon, Barry                      | Barry Mahon        | tt0173928 |
| 1746514890 | 1916 | 1916 | A Fool's Paradise             | A Fool's Paradise             | Abramson, Ivan                    | Ivan Abramson      | tt0157657 |
| 1746581881 | 1950 | 1950 | Undercover Girl               | Undercover Girl               | Pevney, Joseph                    | Joseph Pevney      | tt0043087 |
| 1746408919 | 1988 | 1988 | Moon Over Parador             | Moon Over Parador             | Mazursky, Paul                    | Paul Mazursky      | tt0095654 |
| 1746393104 | 1988 | 1988 | In Dangerous Company          | In Dangerous Company          | Preuss, Ruben                     | Ruben Preuss       | tt0095363 |
| 1746577041 | 1951 | 1951 | Man in the Saddle             | Man in the Saddle             | DeToth, Andre                     | André De Toth      | tt0043781 |
| 1746553735 | 1964 | 1964 | Warm Nights & Hot Pleasures   | Warm Nights and Hot Pleasures | Sarno, Joe                        | Joseph W. Sarno    | tt0057670 |
| 1745302606 | 2005 | 2004 | Dorian Blues                  | Dorian Blues                  | Bardwell, Tennyson                | Tennyson Bardwell  | tt0398963 |
| 1746420540 | 1987 | 1987 | North Shore                   | North Shore                   | Phelps, William                   | William Phelps     | tt0093648 |
| 1746454814 | 1941 | 1941 | Honeymoon for Three           | Honeymoon for Three           | Bacon, Lloyd                      | Lloyd Bacon        | tt0033725 |
| 1746520384 | 1925 | 1925 | The Coming of Amos            | The Coming of Amos            | Sloane, Paul                      | Paul Sloane        | tt0015700 |
| 1746435213 | 1943 | 1943 | So's Your Uncle               | So's Your Uncle               | Yarbrough, Jean                   | Jean Yarbrough     | tt0036369 |
| 1746524347 | 1923 | 1923 | Sinner or Saint               | Sinner or Saint               | Windom, Lawrence                  | Lawrence C. Windom | tt0014475 |
| 1769969973 | 1912 | 1912 | The Starbucks                 | The Starbucks                 |                                   | William J. Bauman  | tt0938813 |
| 1746454953 | 1946 | 1946 | Tokyo Rose                    | Tokyo Rose                    | Landers, Lew                      | Lew Landers        | tt0038177 |
| 1746509561 | 1927 | 1927 | A Reno Divorce                | A Reno Divorce                | Graves, Ralph                     | Ralph Graves       | tt0018317 |
| 1746577208 | 1962 | 1962 | Terror of the Bloodhunters    | Terror of the Bloodhunters    | Warren, Jerry                     | Jerry Warren       | tt0056572 |
| 1746576244 | 1932 | 1932 | The Crowd Roars               | The Crowd Roars               | Hawks, Howard                     | Howard Hawks       | tt0022792 |
| 1746583934 | 1929 | 1929 | Condemned                     | Condemned!                    | Ruggles, Wesley                   | Wesley Ruggles     | tt0019785 |
| 1746585357 | 1939 | 1939 | Overland Mail                 | Overland Mail                 | Hill, Robert                      | Robert F. Hill     | tt0031772 |
| 1746465227 | 1943 | 1943 | The Renegades                 | The Renegade                  | Newfield, Sam                     | Sam Newfield       | tt0036300 |
| 1746577910 | 1937 | 1937 | Reported Missing              | Reported Missing              | Carruth, Milton                   | Milton Carruth     | tt0029476 |
| 1746234164 | 1968 | 1968 | Terror in the Jungle          | Terror in the Jungle          |                                   | Andrew Janczak     | tt0063680 |
| 1746585269 | 1930 | 1930 | The Land of Missing Men       | The Land of Missing Men       | McCarthy, J. P.                   | John P. McCarthy   | tt0021046 |
| 1746584320 | 1936 | 1936 | The Road to Glory             | The Road to Glory             | Hawks, Howard                     | Howard Hawks       | tt0028191 |

|            |      |      |                                           |                                           |                        |                        |           |
|------------|------|------|-------------------------------------------|-------------------------------------------|------------------------|------------------------|-----------|
| 1746585007 | 1940 | 1940 | The Ranger and the Lady                   | The Ranger and the Lady                   | Kane, Joseph           | Joseph Kane            | tt0032972 |
| 1746582906 | 1936 | 1936 | To Mary--With Love                        | To Mary with Love                         | Cromwell, John         | John Cromwell          | tt0028388 |
| 1746509294 | 1925 | 1924 | The Dixie Handicap                        | The Dixie Handicap                        | Barker, Reginald       | Reginald Barker        | tt0015755 |
| 1746435928 | 1990 | 1990 | Without You, I'm Nothing                  | Without You I'm Nothing                   | Boskovich, John        | John Boskovich         | tt0100946 |
| 1769970561 | 1968 | 1968 | Alley Tramp                               | The Alley Tramp                           | Parys, Armand          | Herschell Gordon Lewis | tt0060092 |
| 1746532504 | 1915 | 1915 | The Majesty of the Law                    | The Majesty of the Law                    | Ivers, Julia Crawford  | Julia Crawford Ivers   | tt0005689 |
| 1769970750 | 1912 | 1912 | Across the Sierras                        | Across the Sierras                        |                        | Al Christie            | tt0213426 |
| 1746574838 | 1935 | 1935 | The Man Who Broke the Bank at Monte Carlo | The Man Who Broke the Bank at Monte Carlo | Roberts, Stephen       | Stephen Roberts        | tt0026671 |
| 1746550070 | 1954 | 1954 | Phffft                                    | Phffft                                    | Robson, Mark           | Mark Robson            | tt0047349 |
| 1746573970 | 1963 | 1963 | Island of Love                            | Island of Love                            | DaCosta, Morton        | Morton DaCosta         | tt0057189 |
| 1746248791 | 1979 | 1979 | Kramer vs. Kramer                         | Kramer vs. Kramer                         | Benton, Robert         | Robert Benton          | tt0079417 |
| 1746233709 | 1966 | 1966 | The Ghost and Mr. Chicken                 | The Ghost and Mr. Chicken                 | Rafkin, Alan           | Alan Rafkin            | tt0059221 |
| 1746465205 | 1942 | 1942 | Lawless Plainsmen                         | Lawless Plainsmen                         | Berke, William         | William Berke          | tt0034969 |
| 1746523569 | 1917 | 1917 | Those Who Pay                             | Those Who Pay                             | West, Raymond B.       | Raymond B. West        | tt0182495 |
| 1746485049 | 1918 | 1918 | Little Miss Grown-Up                      | Little Miss Grown Up                      | MacDonald, Sherwood    | Sherwood MacDonald     | tt0186312 |
| 1746553513 | 1964 | 1964 | Pajama Party                              | Pajama Party                              | Weis, Don              | Don Weis               | tt0058440 |
| 1746508475 | 1925 | 1925 | The Reckless Sex                          | The Reckless Sex                          | Neitz, Alvin J.        | Alan James             | tt0016272 |
| 1746485230 | 1917 | 1917 | The Little American                       | The Little American                       | DeMille, Cecil B.      | Cecil B. DeMille       | tt0008188 |
| 1746492706 | 1946 | 1946 | Perilous Holiday                          | Perilous Holiday                          | Griffith, Edward H.    | Edward H. Griffith     | tt0038833 |
| 1745373700 | 2003 | 2003 | Underworld                                | Underworld                                | Wiseman, Len           | Len Wiseman            | tt0320691 |
| 1746574688 | 1933 | 1932 | The Big Drive                             | The Big Drive                             |                        | Albert L. Rule         | tt2372403 |
| 1746577720 | 1938 | 1938 | Four Men and a Prayer                     | Four Men and a Prayer                     | Ford, John             | John Ford              | tt0030150 |
| 1746492248 | 1947 | 1947 | Her Husband's Affairs                     | Her Husband's Affairs                     | Simon, S. Sylvan       | S. Sylvan Simon        | tt0039456 |
| 1746437010 | 1941 | 1941 | Meet the Chump                            | Meet the Chump                            | Cline, Edward          | Edward F. Cline        | tt0033894 |
| 1746568213 | 1933 | 1933 | Daring Daughters                          | Daring Daughters                          | Cabanne, Christy       | Christy Cabanne        | tt0023930 |
| 1746524469 | 1916 | 1916 | A Dream or Two Ago                        | A Dream or Two Ago                        | Kirkwood, James        | James Kirkwood         | tt0125067 |
| 1746555311 | 1955 | 1955 | The Road to Denver                        | The Road to Denver                        | Kane, Joe              | Joseph Kane            | tt0048557 |
| 1769970607 | 1968 | 1968 | Kept                                      | Kept                                      | Anders, Jan            | Nick Millard           | tt0222105 |
| 1746573489 | 1932 | 1932 | After Tomorrow                            | After Tomorrow                            | Borzage, Frank         | Frank Borzage          | tt0022613 |
| 1746584194 | 1937 | 1937 | Exclusive                                 | Exclusive                                 | Hall, Alexander        | Alexander Hall         | tt0028844 |
| 1745342795 | 2007 | 2007 | Shadow Puppets                            | Shadow Puppets                            | Winnick, Michael       | Michael Winnick        | tt0491145 |
| 1746493768 | 1914 | 1914 | Liberty Belles                            | Liberty Belles                            | Henderson, Del         | Dell Henderson         | tt0004219 |
| 1746569626 | 1958 | 1958 | Lonelyhearts                              | Lonelyhearts                              | Donehue, Vincent J.    | Vincent J. Donehue     | tt0053017 |
| 1746185177 | 1965 | 1965 | The Double-Barrelled Detective Story      | The Double Barrelled Detective Story      | Mekas, Adolfas         | Adolfas Mekas          | tt0189485 |
| 1746582683 | 1938 | 1938 | Young Fugitives                           | Young Fugitives                           | Rawlins, John          | John Rawlins           | tt0031001 |
| 1746516350 | 1920 | 1920 | Two Weeks                                 | Two Weeks                                 | Franklin, Sydney A.    | Sidney Franklin        | tt0011800 |
| 1746501520 | 1915 | 1915 | Prohibition                               | Prohibition                               | Reid, Hal              | Hal Reid               | tt0005932 |
| 1746497616 | 1919 | 1919 | The Solitary Sin                          | The Solitary Sin                          | Sullivan, Frederick    | Frederick Sullivan     | tt0010716 |
| 1746410653 | 1981 | 1981 | Body Heat                                 | Body Heat                                 | Kasdan, Lawrence       | Lawrence Kasdan        | tt0082089 |
| 1746582726 | 1936 | 1936 | You May Be Next!                          | You May Be Next!                          | Rogell, Albert S.      | Albert S. Rogell       | tt0028525 |
| 1746578665 | 1950 | 1950 | Trial Without Jury                        | Trial Without Jury                        | Ford, Philip           | Philip Ford            | tt0043068 |
| 1745340795 | 2001 | 2001 | Migiddo: The Omega Code 2                 | Migiddo: The Omega Code 2                 | Trenchard-Smith, Brian | Brian Trenchard        | tt0263728 |
| 1746513460 | 1914 | 1914 | Jane Eyre                                 | Jane Eyre                                 |                        | Martin Faust           | tt0004167 |
| 1746582544 | 1937 | 1937 | Heart of the Rockies                      | Heart of the Rockies                      | Kane, Joseph           | Joseph Kane            | tt0028986 |
| 1746211028 | 1973 | 1973 | Charley Varrick                           | Charley Varrick                           | Siegel, Don            | Don Siegel             | tt0069865 |
| 1746572380 | 1931 | 1931 | Chinatown After Dark                      | Chinatown After Dark                      | Paton, Stuart          | Stuart Paton           | tt0021743 |
| 1746583438 | 1931 | 1931 | Enemies of the Law                        | Enemies of the Law                        | Windom, Lawrence C.    | Lawrence C. Windom     | tt0021837 |
| 1746574738 | 1935 | 1935 | The Winning Ticket                        | The Winning Ticket                        | Riesner, Charles F.    | Charles Reisner        | tt0027222 |
| 1769970423 | 1964 | 1964 | Nudes, Inc.                               | Nudes Inc.                                | Mahon, Barry           | Barry Mahon            | tt0145138 |
| 1746584714 | 1929 | 1929 | Come and Get It                           | Come and Get It!                          | Fox, Wallace           | Wallace Fox            | tt0019784 |
| 1745359557 | 2009 | 2009 | Motherhood                                | Motherhood                                | Dieckmann, Katherine   | Katherine Dieckmann    | tt1220220 |
| 1746523818 | 1915 | 1915 | Secretary of Frivolous Affairs            | The Secretary of Frivolous Affairs        | Ricketts, Thomas       | Tom Ricketts           | tt0006021 |
| 1746566045 | 1957 | 1957 | Jamboree!                                 | Jamboree!                                 | Lockwood, Roy          | Roy Lockwood           | tt0050557 |
| 1746495847 | 1919 | 1919 | The Game's Up                             | The Game's Up                             | Wilson, Elsie Jane     | Elsie Jane Wilson      | tt0010154 |
| 1746583909 | 1929 | 1929 | Just Off Broadway                         | Just Off Broadway                         | O'Connor, Frank        | Frank O'Connor         | tt0020051 |
| 1746585377 | 1940 | 1940 | Melody and Moonlight                      | Melody and Moonlight                      | Santley, Joseph        | Joseph Santley         | tt0032780 |
| 1746583564 | 1950 | 1950 | Southside 1-1000                          | Southside 1 1000                          | Ingster, Boris         | Boris Ingster          | tt0042989 |

|            |      |      |                                      |                                      |                                |                    |           |
|------------|------|------|--------------------------------------|--------------------------------------|--------------------------------|--------------------|-----------|
| 1746508717 | 1926 | 1925 | The Million Dollar Handicap          | The Million Dollar Handicap          | Sidney, Scott                  | Scott Sidney       | tt0016110 |
| 1746511752 | 1915 | 1915 | The Siren's Song                     | The Siren's Song                     | Lederer, George W.             | George W. Lederer  | tt0006055 |
| 1746571806 | 1932 | 1932 | Outlaw Justice                       | Outlaw Justice                       | Schaefer, Armand               | Armand Schaefer    | tt0023310 |
| 1746584673 | 1929 | 1929 | Acquitted                            | Acquitted                            | Strayer, Frank R.              | Frank R. Strayer   | tt0019621 |
| 1746577038 | 1962 | 1962 | David and Lisa                       | David and Lisa                       | Perry, Frank                   | Frank Perry        | tt0055892 |
| 1746198257 | 1968 | 1968 | The Subject Was Roses                | The Subject Was Roses                | Grosbard, Ulu                  | Ulu Grosbard       | tt0063654 |
| 1746582898 | 1938 | 1938 | One Wild Night                       | One Wild Night                       | Forde, Eugene                  | Eugene Forde       | tt0030526 |
| 1769970779 | 1912 | 1912 | The Poacher                          | The Poacher                          | Henderson, Lucius              | Lucius Henderson   | tt0414375 |
| 1746575886 | 1931 | 1931 | The Phantom of Paris                 | The Phantom of Paris                 | Robertson, John S.             | John S. Robertson  | tt0022264 |
| 1746492235 | 1945 | 1945 | Rockin' in the Rockies               | Rockin' in the Rockies               | Keays, Vernon                  | Vernon Keays       | tt0038033 |
| 1746503772 | 1921 | 1921 | Dangerous Toys                       | Dangerous Toys                       | Bradley, Samuel                | Samuel R. Bradley  | tt0012090 |
| 1746580381 | 1938 | 1937 | Brothers of the West                 | Brothers of the West                 | Katzman, Sam                   | Sam Katzman        | tt0028666 |
| 1746580424 | 1938 | 1938 | Federal Man-Hunt                     | Federal Man-Hunt                     | Grinde, Nick                   | Nick Grinde        | tt0030122 |
| 1746532738 | 1916 | 1916 | It Happened in Honolulu              | It Happened in Honolulu              | Reynolds, Lynn                 | Lynn Reynolds      | tt0006875 |
| 1746219594 | 1979 | 1979 | The Lady in Red                      | The Lady in Red                      | Teague, Lewis                  | Lewis Teague       | tt0079429 |
| 1746513076 | 1912 | 1912 | The Impostor                         | The Impostor                         |                                |                    | tt1125339 |
| 1746530669 | 1949 | 1949 | Johnny Allegro                       | Johnny Allegro                       | Tetzlaff, Ted                  | Ted Tetzlaff       | tt0041527 |
| 1745303062 | 2006 | 2005 | Film Geek                            | Film Geek                            | Westby, James                  | James Westby       | tt0443506 |
| 1746499918 | 1949 | 1949 | Susanna Pass                         | Susanna Pass                         | Witney, William                | William Witney     | tt0041935 |
| 1746423995 | 1941 | 1941 | Adam Had Four Sons                   | Adam Had Four Sons                   | Ratoff, Gregory                | Gregory Ratoff     | tt0033314 |
| 1769970674 | 1966 | 1966 | The Notorious Daughter of Fanny Hill | The Notorious Daughter of Fanny Hill | Stoopsberry, Peter             | Peter Perry Jr.    | tt0060761 |
| 1746555567 | 1956 | 1956 | Miracle in the Rain                  | Miracle in the Rain                  | Maté, Rudolph                  | Rudolph Maté       | tt0049509 |
| 1746504132 | 1917 | 1917 | The Savage                           | The Savage                           | Julian, Rupert                 | Rupert Julian      | tt0008538 |
| 1745341992 | 2008 | 2008 | Max Payne                            | Max Payne                            | Moore, John                    | John Moore         | tt0467197 |
| 1745342242 | 2004 | 2004 | Finding Neverland                    | Finding Neverland                    | Forster, Marc                  | Marc Forster       | tt0308644 |
| 1746524789 | 1915 | 1915 | Mrs. Plum's Pudding                  | Mrs. Plum's Pudding                  | Christie, Al E.                | Al Christie        | tt0005785 |
| 1746503903 | 1920 | 1920 | Sky Eye                              | Sky Eye                              | Kennedy, Aubrey M.             | Aubrey M. Kennedy  | tt0197890 |
| 1746454090 | 1944 | 1944 | The Scarlet Claw                     | The Scarlet Claw                     | Neill, Roy William             | Roy William Neill  | tt0037248 |
| 1746422284 | 1993 | 1993 | True Romance                         | True Romance                         | Scott, Tony                    | Tony Scott         | tt0108399 |
| 1746249024 | 1980 | 1980 | Forbidden Zone                       | Forbidden Zone                       | Elfman, Richard                | Richard Elfman     | tt0080752 |
| 1746566033 | 1957 | 1957 | No Time to Be Young                  | No Time to Be Young                  | Rich, David                    | David Lowell Rich  | tt0050774 |
| 1746514256 | 1916 | 1916 | Hop, the Devil's Brew                | Hop, the Devil's Brew                | Weber, Lois; Smalley, Phillips | Phillips Smalley   | tt0006827 |
| 1746583433 | 1951 | 1951 | Force of Arms                        | Force of Arms                        | Curtiz, Michael                | Michael Curtiz     | tt0043553 |
| 1746586156 | 1940 | 1940 | Foreign Correspondent                | Foreign Correspondent                | Hitchcock, Alfred              | Alfred Hitchcock   | tt0032484 |
| 1746567270 | 1933 | 1933 | The Big Cage                         | The Big Cage                         | Neumann, Kurt                  | Kurt Neumann       | tt0023807 |
| 1746454104 | 1943 | 1943 | City Without Men                     | City Without Men                     | Salkow, Sidney                 | Sidney Salkow      | tt0035740 |
| 1746532848 | 1915 | 1915 | Little Pal                           | Little Pal                           | Kirkwood, James                | James Kirkwood     | tt0005636 |
| 1746235423 | 1980 | 1980 | Simon                                | Simon                                | Brickman, Marshall             | Marshall Brickman  | tt0081518 |
| 1746235057 | 1975 | 1975 | French Connection II                 | French Connection II                 | Frankenheimer, John            | John Frankenheimer | tt0073018 |
| 1746410616 | 1991 | 1990 | Too Much Sun                         | Too Much Sun                         | Downey, Robert                 | Robert Downey Sr.  | tt0103100 |
| 1745293595 | 2005 | 2005 | The Gospel                           | The Gospel                           | Hardy, Rob                     | Rob Hardy          | tt0451069 |
| 1746392818 | 1982 | 1982 | Goin' All the Way                    | Goin' All the Way!                   | Freedman, Robert               | Robert Freeman     | tt0084010 |
| 1745359354 | 2011 | 2010 | Louder than a Bomb                   | Louder than a Bomb                   | Jacobs, Greg; Siskel, Jon      | Greg Jacobs        | tt1540978 |
| 1746410358 | 1984 | 1984 | Firstborn                            | Firstborn                            | Apted, Michael                 | Michael Apted      | tt0087263 |
| 1745393823 | 2010 | 2010 | Green Zone                           | Green Zone                           | Greengrass, Paul               | Paul Greengrass    | tt0947810 |
| 1745358667 | 2004 | 2003 | Robot Stories                        | Robot Stories                        | Pak, Greg                      | Greg Pak           | tt0301777 |
| 1746455504 | 1996 | 1995 | Man of the Year                      | Man of the Year                      | Shafer, Dirk                   | Dirk Shafer        | tt0113756 |
| 1746273689 | 1978 | 1978 | Caravans                             | Caravans                             | Fargo, James                   | James Fargo        | tt0077296 |
| 1745341849 | 2001 | 2001 | Texas Rangers                        | Texas Rangers                        | Miner, Steve                   | Steve Miner        | tt0193560 |
| 1746219602 | 1972 | 1971 | Blue Sextet                          | The Blue Sextet                      | Durston, David E.              | David E. Durston   | tt0066851 |
| 1746409938 | 1991 | 1991 | At Play in the Fields of the Lord    | At Play in the Fields of the Lord    | Babenco, Hector                | Hector Babenco     | tt0101373 |
| 1745341859 | 2003 | 2003 | Khachaturian                         | Khachaturian                         | Rosen, Peter                   | Peter Rosen        | tt0396087 |
| 1746433896 | 1998 | 1997 | Ill Gotten Gains                     | Ill Gotten Gains                     | Marsden, Joel Ben              | Joel B. Marsden    | tt0119352 |
| 1746249747 | 1975 | 1975 | Darktown Strutters                   | Darktown Strutters                   | Witney, William                | William Witney     | tt0072844 |
| 1746218867 | 1978 | 1978 | Corvette Summer                      | Corvette Summer                      | Robbins, Matthew               | Matthew Robbins    | tt0077372 |
| 1746394246 | 1987 | 1986 | Hunter's Blood                       | Hunter's Blood                       | Hughes, Robert C.              | Robert C. Hughes   | tt0093232 |
| 1745293493 | 2006 | 2006 | Headspace                            | Head Space                           | Van den Houten, Andrew         | Melech Erlbaum     | tt0806084 |

|            |      |      |                                                |                                                      |                                      |                                     |           |
|------------|------|------|------------------------------------------------|------------------------------------------------------|--------------------------------------|-------------------------------------|-----------|
| 1746219351 | 1974 | 1974 | Forgotten Island of Santosha                   | Forgotten Island of Santosha                         | Yates, Larry                         | Larry Yates                         | tt0071515 |
| 1769977381 | 1983 | 1983 | Max Dugan Returns                              | Max Dugan Returns                                    | Ross, Herbert                        | Herbert Ross                        | tt0085919 |
| 1746393257 | 1981 | 1981 | Zoot Suit                                      | Zoot Suit                                            | Valdez, Luis                         | Luis Valdez                         | tt0083365 |
| 1746408888 | 1992 | 1991 | Little Noises                                  | Little Noises                                        | Spencer, Jane                        | Jane Spencer                        | tt0102317 |
| 1746422173 | 1993 | 1993 | Amongst Friends                                | Amongst Friends                                      | Weiss, Rob                           | Rob Weiss                           | tt0106264 |
| 1746524977 | 1923 | 1923 | Condemned                                      | Condemned                                            | Rosson, Arthur                       | Arthur Rosson                       | tt0013945 |
| 1746501098 | 1922 | 1922 | Roars and Uproars                              | Roars and Uproars                                    |                                      | William Campbell                    | tt1488059 |
| 1746504363 | 1921 | 1921 | The Fatal 30                                   | The Fatal 30                                         | Hayes, John J.                       | John J. Hayes                       | tt0131385 |
| 1746525067 | 1921 | 1921 | The Winding Trail                              | The Winding Trail                                    | Martin, George                       | George Martin                       | tt0179539 |
| 1746516096 | 1921 | 1921 | Cotton and Cattle                              | Cotton and Cattle                                    | Franchon, Leonard                    | Leonard Franchon                    | tt0321767 |
| 1746504770 | 1920 | 1920 | Love's Battle                                  | Love's Battle                                        | Craft, William J.                    | William James Craft                 | tt0196719 |
| 1746486843 | 1920 | 1921 | The Jailbird                                   | The Jail Bird                                        | Ingraham, Lloyd                      | Hal Roach                           | tt0492084 |
| 1746516298 | 1920 | 1920 | Wolves of the Street                           | Wolves of the Street                                 | Thayer, Otis B.                      | Otis Thayer                         | tt0203209 |
| 1746467738 | 1917 | 1917 | The Zeppelin's Last Raid                       | The Zeppelin's Last Raid                             | Willat, Irvin V.                     | Irvin Willat                        | tt0009847 |
| 1746485212 | 1917 | 1918 | Ambrose's Icy Love                             | Ambrose's Icy Love                                   | Frederick, W. S.                     | Walter S. Fredericks                | tt0270828 |
| 1746524037 | 1915 | 1915 | The Last of the Mafia                          | The Last of the Mafia                                | Goldin, Sidney M.                    | Sidney M. Goldin                    | tt0005607 |
| 1746513386 | 1914 | 1914 | Pieces of Silver; a Story of Hearts and Souls  | Pieces of Silver: A Story of Hearts and Souls        | Gaskill, Charles L.                  | Charles L. Gaskill                  | tt0004469 |
| 1746257242 | 1980 | 1980 | Memories of Duke                               | Memories of Duke                                     | Keys, Gary                           | Gary Keys                           | tt0206131 |
| 1746218808 | 1976 | 1976 | Massacre at Central High                       | Massacre at Central High                             | Daalder, Renee                       | Rene Daalder                        | tt0074875 |
| 1746235691 | 1975 | 1974 | Always a New Beginning                         | Always a New Beginning                               | Goodell, John D.                     | John D. Goodell                     | tt0069699 |
| 1746235537 | 1975 | 1974 | Impulse                                        | Impulse                                              | Grefé, William                       | William Grefé                       | tt0071654 |
| 1745358638 | 2009 | 2009 | The Haunting in Connecticut                    | The Haunting in Connecticut                          | Cornwell, Peter                      | Peter Cornwell                      | tt0492044 |
| 1745282906 | 2007 | 2007 | My Name is Alan and I Paint Pictures           | My Name Is Alan, and I Paint Pictures                | Boston, Johnny                       | Johnny Boston                       | tt0989759 |
| 1745302800 | 2007 | 2006 | The Holy Modal Rounders: Bound to Lose         | The Holy Modal Rounders: Bound to Lose               | Douglas, Samuel Wainwright ; Lovel   | Sam Wainwright Douglas              | tt0495120 |
| 1745293918 | 2006 | 2006 | Awesome: I Fuckin' Shot That!                  | Awesome: I Fuckin' Shot That!                        | Hornblower, Nathaniel                | Adam Yauch                          | tt0488953 |
| 1745340316 | 2003 | 2003 | The Texas Chainsaw Massacre                    | The Texas Chainsaw Massacre                          | Nispel, Marcus                       | Marcus Nispel                       | tt0324216 |
| 1746578934 | 1951 | 1951 | Fort Dodge Stampede                            | Fort Dodge Stampede                                  | Keller, Harry                        | Harry Keller                        | tt0043555 |
| 1746542648 | 1949 | 1949 | Omoo-Omoo The Shark God                        | Omoo Omoo the Shark God                              | Leonard, Leon                        | Leon Leonard                        | tt0041715 |
| 1746491810 | 1948 | 1948 | Rocky                                          | Rocky                                                | Karlson, Phil                        | Phil Karlson                        | tt0040743 |
| 1746499910 | 1948 | 1948 | Carson City Raiders                            | Carson City Raiders                                  | Canutt, Yakima                       | Yakima Canutt                       | tt0040213 |
| 1746439129 | 1943 | 1943 | The Ghost and the Guest                        | The Ghost and the Guest                              | Nigh, William                        | William Nigh                        | tt0035938 |
| 1769976172 | 1928 | 1928 | All Set                                        | All Set                                              | Sweet, Harry                         | Harry Sweet                         | tt0349082 |
| 1746507912 | 1926 | 1926 | Free Kisses                                    | Free Kisses                                          | Nye, William                         | William Nigh                        | tt0325426 |
| 1746509368 | 1925 | 1925 | Fangs of Wolfheart                             | Fangs of Wolfheart                                   | Seeling, Charles R.                  | Charles R. Seeling                  | tt0015793 |
| 1746424367 | 1940 | 1940 | Wild Horse Range                               | Wild Horse Range                                     | Johnson, Raymond K.                  | Bernard B. Ray                      | tt0033261 |
| 1746435246 | 1940 | 1940 | Too Many Husbands                              | Too Many Husbands                                    | Ruggles, Wesley                      | Wesley Ruggles                      | tt0033174 |
| 1746582724 | 1938 | 1938 | Monastery                                      | Monastery                                            | Alexander, Robert                    | Robert Alexander                    | tt0151611 |
| 1746582763 | 1936 | 1936 | Every Saturday Night                           | Every Saturday Night                                 | Tinling, James                       | James Tinling                       | tt0027584 |
| 1746577459 | 1962 | 1962 | The Mermaids of Tiburon                        | Mermaids of Tiburon                                  | Lamb, John                           | John Lamb                           | tt0056233 |
| 1746569790 | 1958 | 1958 | The Colossus of New York                       | The Colossus of New York                             | Lourie, Eugene                       | Eugène Lourié                       | tt0051484 |
| 1746562360 | 1955 | 1955 | Last of the Desperados                         | Last of the Desperados                               | Newfield, Sam                        | Sam Newfield                        | tt0048288 |
| 1746563921 | 1953 | 1953 | The Actress                                    | The Actress                                          | Cukor, George                        | George Cukor                        | tt0045471 |
| 1746571076 | 1952 | 1952 | Leadville Gunslinger                           | Leadville Gunslinger                                 | Keller, Harry                        | Harry Keller                        | tt0044831 |
| 1746211465 | 1972 | 1972 | To Find a Man                                  | To Find a Man                                        | Kulik, Buzz; Schulman, Arnold        | Buzz Kulik                          | tt0069385 |
| 1746219355 | 1971 | 1971 | 7254                                           | 7254                                                 | Stember, John                        | John Stember                        | tt0273404 |
| 1769973250 | 1970 | 1970 | Anomalies--A World of Dreams                   | Anomalies: A World of Dreams                         |                                      |                                     | tt0210529 |
| 1769971124 | 1969 | 1969 | Donna and Lisa                                 | Donna and Lisa                                       | Winters, Larry                       | Larry Winters                       | tt0217381 |
| 1769971903 | 1969 | 1969 | I Am Furious                                   | I Am Furious                                         | Patrick, Alain                       | Alain Patrick                       | tt0220562 |
| 1746582654 | 1935 | 1935 | Rainbow Valley                                 | Rainbow Valley                                       | Bradbury, R. N.                      | Robert N. Bradbury                  | tt0026908 |
| 1746583051 | 1934 | 1934 | The First World War                            | The First World War                                  |                                      |                                     | tt0976117 |
| 1745272057 | 2000 | 2000 | Keep the River on Your Right: A Modern Canniba | Keep the River on Your Right: A Modern Can           | Shapiro, David ; Shapiro, Laurie Gwe | David Shapiro                       | tt0206187 |
| 1746433898 | 1998 | 1998 | Moment of Impact                               | Moment of Impact                                     | Loktev, Julia                        | Julia Loktev                        | tt0154893 |
| 1746433576 | 1997 | 1996 | The Closest Thing to Heaven                    | The Closest Thing to Heaven                          | Pentes, Dorne                        | Dorne M. Pentes                     | tt0115912 |
| 1746421609 | 1997 | 1997 | Camp Stories                                   | Camp Stories                                         | Beigel, Herbert                      | Herbert Beigel                      | tt0115811 |
| 1746500394 | 1924 | 1923 | A Few Moments with Eddie Cantor Star of "Kid B | A Few Moments with Eddie Cantor, Star of 'Kid Boots' |                                      | Lee De Forest                       | tt0014886 |
| 1746570952 | 1910 | 1910 | The Fence on Bar Z Ranch                       | The Fence on 'Bar Z' Ranch                           |                                      | Gilbert M. 'Broncho Billy' Anderson | tt0001213 |
| 1746218762 | 1976 | 1975 | Guitar Picks and Roach Clips                   | Guitar Picks & Roach Clips                           | Noel, Anton                          | Anton Noel                          | tt3616666 |

|            |      |      |                                |                                |                             |                           |           |
|------------|------|------|--------------------------------|--------------------------------|-----------------------------|---------------------------|-----------|
| 1746573922 | 1962 | 1962 | Trauma                         | Trauma                         | Young, Robert Malcolm       | Robert M. Young           | tt0056611 |
| 1746508181 | 1926 | 1926 | Everybody's Acting             | Everybody's Acting             | Neilan, Marshall            | Marshall Neilan           | tt0016829 |
| 1746509315 | 1925 | 1925 | Bad Man From Bodie             | Bad Man from Bodie             |                             | Charles R. Seeling        | tt0015595 |
| 1746169706 | 1910 | 1910 | Among the Roses                | Among the Roses                |                             | Harry Solter              | tt0200432 |
| 1746577756 | 1933 | 1933 | Through the Centuries          | Through the Centuries          |                             |                           | tt0024666 |
| 1746578962 | 1961 | 1961 | Hey, Let's Twist!              | Hey, Let's Twist!              | Garrison, Greg              | Greg Garrison             | tt0054971 |
| 1746582056 | 1910 | 1910 | Justice in the Far North       | Justice in the Far North       |                             | Harry Solter              | tt0200756 |
| 1746583598 | 1931 | 1931 | East Lynne                     | East Lynne                     | Lloyd, Frank                | Frank Lloyd               | tt0021826 |
| 1746569604 | 1958 | 1959 | House on Haunted Hill          | House on Haunted Hill          | Castle, William             | William Castle            | tt0051744 |
| 1746503515 | 1919 | 1919 | Almost Married                 | Almost Married                 | Swickard, Charles           | Marcel Perez              | tt1319052 |
| 1746208099 | 1968 | 1968 | Wild 90                        | Wild 90                        | Mailer, Norman              | Norman Mailer             | tt0062492 |
| 1746208559 | 1969 | 1969 | The Tree                       | The Tree                       | Guenette, Robert            | Robert Guenette           | tt0228969 |
| 1746501763 | 1910 | 1910 | Peg Woffington                 | Peg Woffington                 |                             | Edwin S. Porter           | tt0388329 |
| 1746581884 | 1910 | 1910 | In Africa                      | In Africa                      |                             |                           | tt1912410 |
| 1746581085 | 1910 | 1910 | The Iconoclast                 | The Iconoclast                 | Griffith, D. W.             | D.W. Griffith             | tt0001259 |
| 1746491790 | 1947 | 1946 | Mantan Runs for Mayor          | Mantan Runs for Mayor          |                             |                           | tt0135538 |
| 1746523931 | 1910 | 1910 | A Yorkshire School             | A Yorkshire School             | White, James H.             | James H. White            | tt1499626 |
| 1746487068 | 1918 | 1918 | Cupid Angling                  | Cupid Angling                  |                             |                           | tt0008984 |
| 1769976721 | 1929 | 1929 | Climbing the Golden Stairs     | Climbing the Golden Stairs     | Edwards, Gus                | Gus Edwards               | tt0370419 |
| 1746581715 | 1928 | 1928 | The Patriot                    | The Patriot                    | Lubitsch, Ernst             | Ernst Lubitsch            | tt0019257 |
| 1746473923 | 1945 | 1945 | Detour                         | Detour                         | Ulmer, Edgar G.             | Edgar G. Ulmer            | tt0037638 |
| 1746501287 | 1915 | 1915 | The Unafraid                   | The Unafraid                   | DeMille, Cecil B.           | Cecil B. DeMille          | tt0006194 |
| 1769969565 | 1911 | 1911 | Mrs. Gaylife's Visitors        | Mrs. Gay Life's Visitors       | Hamilton, Gilbert P.        | Gilbert P. Hamilton       | tt1161785 |
| 1746219551 | 1973 | 1974 | Snapshots                      | The Snapshot                   | Horowitz, Irving            | Danny Biederman           | tt6456298 |
| 1745302282 | 2005 | 2005 | Lost                           | The Host                       | Lemke, Darren               | Kyle Ng                   | tt6527512 |
| 1746256858 | 1977 | 1977 | Saturday Night Fever           | Saturday Night Fever           | Badham, John                | John Badham               | tt0076666 |
| 1746235420 | 1971 | 1972 | The Pink Angels                | Pink Angels                    | Brown, Lawrence             | Larry G. Brown            | tt0156894 |
| 1746272424 | 1979 | 1979 | Wanda Nevada                   | Wanda Nevada                   | Fonda, Peter                | Peter Fonda               | tt0080116 |
| 1746419917 | 1993 | 1993 | Benefit of the Doubt           | Benefit of the Doubt           | Heap, Jonathan              | Jonathan Heap             | tt0106386 |
| 1745359200 | 2004 | 2003 | A Foreign Affair               | A Foreign Affair               | Schleppi, Helmut            | Helmut Schleppi           | tt0305583 |
| 1745322647 | 2005 | 2005 | Stay                           | Stray                          | Forster, Marc               | Theresa Wingert           | tt0471038 |
| 1746209713 | 1970 | 1970 | Divorce Las Vegas Style        | Divorce Las Vegas Style        | White, William              | William White             | tt1869374 |
| 1745303045 | 2005 | 2005 | One Six Right                  | One Six Right                  | Terwilliger, Brian J.       | Brian J. Terwilliger      | tt0475994 |
| 1746248887 | 1978 | 1978 | The Boys from Brazil           | The Boys from Brazil           | Schaffner, Franklin J.      | Franklin J. Schaffner     | tt0077269 |
| 1746421593 | 1992 | 1992 | A Midnight Clear               | A Midnight Clear               | Gordon, Keith               | Keith Gordon              | tt0102443 |
| 1769973307 | 1970 | 1970 | Take It Out in Trade           | Take It Out in Trade           |                             | Edward D. Wood Jr.        | tt0350184 |
| 1746434642 | 1996 | 1995 | Parallel Sons                  | Parallel Sons                  | Young, John G.              | John G. Young             | tt0114089 |
| 1746394529 | 1987 | 1987 | Lady Beware                    | Lady Beware                    | Arthur, Karen               | Karen Arthur              | tt0093379 |
| 1746248799 | 1974 | 1974 | Country Hooker                 | Country Hooker                 | Guinn, Lew                  | Lew Guinn                 | tt0123740 |
| 1746235494 | 1971 | 1971 | Scandalous John                | Scandalous John                | Butler, Robert              | Robert Butler             | tt0067712 |
| 1745359779 | 2004 | 2004 | Breakin' All the Rules         | Breakin' All the Rules         | Taplitz, Daniel             | Daniel Taplitz            | tt0349169 |
| 1746409273 | 1986 | 1986 | Belizaire the Cajun            | Belizaire the Cajun            | Pitre, Glen                 | Glen Pitre                | tt0090710 |
| 1745302388 | 2005 | 2005 | The Grace Lee Project          | The Grace Lee Project          | Lee, Grace                  | Grace Lee                 | tt0451070 |
| 1745359464 | 2009 | 2009 | The Good Soldier               | Good Soldiers                  | Lovell, Lexy ; Uys, Michael | Ari Sklar                 | tt1608143 |
| 1745342239 | 2002 | 2003 | Crush                          | Brush                          | McKay, John                 | David Christopher Johnson | tt1870345 |
| 1746409356 | 1982 | 1982 | Amityville II: The Possession  | Amityville II: The Possession  | Damiani, Damiano            | Damiano Damiani           | tt0083550 |
| 1746218747 | 1973 | 1973 | When the Line Goes Through     | When the Line Goes Through     | Ware, Clyde                 | Clyde Ware                | tt0070914 |
| 1746218912 | 1979 | 1979 | Natural Enemies                | Natural Enemies                | Kanew, Jeff                 | Jeff Kanew                | tt0079613 |
| 1746394158 | 1991 | 1991 | The Doctor                     | The Doctor                     | Haines, Randa               | Randa Haines              | tt0101746 |
| 1746433715 | 2000 | 2000 | You Can Count on Me            | You Can Count on Me            | Loneran, Kenneth            | Kenneth Loneran           | tt0203230 |
| 1746269890 | 1980 | 1980 | It's My Turn                   | It's My Turn                   | Weill, Claudia              | Claudia Weill             | tt0080936 |
| 1746256265 | 1975 | 1975 | How Come Nobody's On Our Side? | How Come Nobody's on Our Side? | Michaels, Richard           | Richard Michaels          | tt0073127 |
| 1746435000 | 1990 | 1990 | Waiting for the Light          | Waiting for the Light          | Monger, Christopher         | Christopher Monger        | tt0100899 |
| 1746258203 | 1976 | 1976 | The Last Hard Men              | The Last Hard Men              | McLaglen, Andrew V.         | Andrew V. McLaglen        | tt0074776 |
| 1746218719 | 1971 | 1970 | Wanda                          | Wanda                          | Loden, Barbara              | Barbara Loden             | tt0067961 |
| 1745302440 | 2006 | 2006 | Fast Food Nation               | Fast Food Nation               | Linklater, Richard          | Richard Linklater         | tt0460792 |
| 1746408896 | 1985 | 1984 | Wildrose                       | Wildrose                       | Hanson, John                | John Hanson               | tt0088404 |



|            |      |      |                                      |                                       |                                   |                     |           |
|------------|------|------|--------------------------------------|---------------------------------------|-----------------------------------|---------------------|-----------|
| 1745282562 | 2005 | 2005 | The Painting                         | The Painting                          | Rose, Joshua ; Manoogian, Peter   | Andrew McQuinn      | tt1536475 |
| 1745342798 | 2002 | 2002 | Heartbreak Hospital                  | Heartbreak Hospital                   | Gerber, Ruedi                     | Ruedi Gerber        | tt0219756 |
| 1746438685 | 2000 | 2000 | The Filth and the Fury               | The Filth and the Fury                | Temple, Julien                    | Julien Temple       | tt0236216 |
| 1746454262 | 1999 | 1999 | The Hungry Bachelors Club            | The Hungry Bachelors Club             | Ruzzin, Gregory                   | Gregory Ruzzin      | tt0197570 |
| 1746235709 | 1977 | 1977 | The Lincoln Conspiracy               | The Lincoln Conspiracy                | Conway, James L.                  | James L. Conway     | tt0076315 |
| 1745342709 | 2010 | 2010 | Skyline                              | Skyline                               | Strause, Greg; Strause, Colin     | Colin Strause       | tt1564585 |
| 1746455164 | 2000 | 1999 | Running Free                         | Running Free                          | Bodrov, Sergei                    | Sergei Bodrov       | tt0173910 |
| 1746408869 | 1983 | 1982 | Let's Spend the Night Together       | Let's Spend the Night Together        | Ashby, Hal                        | Hal Ashby           | tt0084242 |
| 1746419601 | 1994 | 1994 | Grief                                | Grief                                 | Glatzer, Richard                  | Shugo Fujii         | tt0422361 |
| 1745372480 | 2008 | 2008 | Rent: Filmed Live on Broadway        | Rent: Filmed Live on Broadway         | Warren, Michael John              | Michael John Warren | tt1273675 |
| 1746434323 | 1998 | 1997 | Little Boy Blue                      | Little Boy Blue                       | Tibaldi, Antonio                  | Antonio Tibaldi     | tt0119547 |
| 1745394891 | 2008 | 2008 | B.O.H.I.C.A.                         | B.O.H.I.C.A.                          | Paul, D. J.                       | D.J. Paul           | tt1090190 |
| 1745358577 | 2009 | 2009 | The Strip                            | The Strip                             | Khan, Jameel                      | Maxwell Price       | tt1645925 |
| 1746234765 | 1980 | 1980 | Generations of Resistance            | Generations of Resistance             | Davis, Peter                      | Peter Davis         | tt0212177 |
| 1745394147 | 2010 | 2010 | Fair Game                            | Fair Game                             | Liman, Doug                       | Doug Liman          | tt0977855 |
| 2007989476 | 1989 | 1989 | Renegades                            | Renegades                             | Sholder, Jack                     | Jack Sholder        | tt0098188 |
| 1746235293 | 1973 | 1972 | The Daredevil                        | The Daredevil                         | Stringer, Robert W.               | Robert W. Stringer  | tt0068445 |
| 1746423331 | 1998 | 1997 | Talk to Me                           | Talk to Me                            | Esguerra, George                  | George Esguerra     | tt0117829 |
| 1769973221 | 1970 | 1969 | Mona                                 | The Monk                              | Osco, Bill                        | George McCowan      | tt0064685 |
| 1746235467 | 1972 | 1972 | Hammersmith Is Out                   | Hammersmith Is Out                    | Ustinov, Peter                    | Peter Ustinov       | tt0068674 |
| 1746235208 | 1975 | 1975 | Lepke                                | Lepke                                 | Golan, Menahem                    | Menahem Golan       | tt0073279 |
| 1745358078 | 2008 | 2008 | Were the World Mine                  | Were the World Mine                   | Gustafson, Tom                    | Tom Gustafson       | tt0476991 |
| 1746203244 | 1970 | 1970 | The Boatniks                         | The Boatniks                          | Tokar, Norman                     | Norman Tokar        | tt0065482 |
| 1746420890 | 1991 | 1991 | Scissors                             | Scissors                              | De Felitta, Frank                 | Frank De Felitta    | tt0102860 |
| 1746235915 | 1976 | 1976 | The Pink Panther Strikes Again       | The Pink Panther Strikes Again        | Edwards, Blake                    | Blake Edwards       | tt0075066 |
| 1746409979 | 1986 | 1986 | Torment                              | Torment                               | Aslanian, Samson; Hopkins, John   | Samson Aslanian     | tt0092100 |
| 1746438202 | 1999 | 1999 | Dill Scallion                        | Dill Scallion                         | Brady, Jordan                     | Jordan Brady        | tt0179769 |
| 1746394185 | 1993 | 1993 | Aspen Extreme                        | Aspen Extreme                         | Hasburgh, Patrick                 | Patrick Hasburgh    | tt0106315 |
| 1746219371 | 1974 | 1973 | The Devil's Triangle                 | The Devil's Triangle                  | Winer, Richard                    | Richard Winer       | tt0071416 |
| 1746436259 | 1999 | 1998 | Just a Little Harmless Sex           | Just a Little Harmless Sex            | Rosenthal, Rick                   | Rick Rosenthal      | tt0175777 |
| 1746209989 | 1970 | 1971 | Guess What Happened to Count Dracula | Guess What Happened to Count Dracula? |                                   | Laurence Merrick    | tt0139288 |
| 1745360024 | 2002 | 2002 | Being Claudine                       | Being Claudine                        | Quirk, I-fan                      | I                   | tt0326756 |
| 1746251210 | 1975 | 1975 | 92 in the Shade                      | 92 in the Shade                       | McGuane, Thomas                   | Thomas McGuane      | tt0072594 |
| 1746455328 | 1996 | 1996 | Phat Beach                           | Phat Beach                            | Ellin, Doug                       | Doug Ellin          | tt0117332 |
| 1745393718 | 2010 | 2009 | Formosa Betrayed                     | Formosa Betrayed                      | Kane, Adam                        | Adam Kane           | tt1121786 |
| 1746393048 | 1985 | 1985 | Bad Medicine                         | Bad Medicine                          | Miller, Harvey                    | Harvey Miller       | tt0088765 |
| 1746235034 | 1972 | 1972 | The Biscuit Eater                    | The Biscuit Eater                     | McEveety, Vincent                 | Vincent McEveety    | tt0068276 |
| 1746235255 | 1978 | 1978 | Comes a Horseman                     | Comes a Horseman                      | Pakula, Alan J.                   | Alan J. Pakula      | tt0077360 |
| 1746235815 | 1973 | 1973 | The MacKintosh Man                   | The MacKintosh Man                    | Huston, John                      | John Huston         | tt0070351 |
| 1745360028 | 2004 | 2003 | Risk/Reward                          | Risk/Reward                           | Holder, Elizabeth ; Parker, Xan   | Elizabeth Holder    | tt0358079 |
| 1745373209 | 2002 | 2002 | Jim Brown: All American              | Jim Brown: All American               | Lee, Spike                        | Spike Lee           | tt0309735 |
| 1745293345 | 2006 | 2006 | Waltzing Anna                        | Waltzing Anna                         | Giongrete, B. X.; Bollinger, Doug | Doug Bollinger      | tt0431461 |
| 1746210723 | 1971 | 1971 | Summertree                           | Summertree                            | Newley, Anthony                   | Anthony Newley      | tt0067804 |
| 1746219394 | 1976 | 1976 | People of the Wind                   | People of the Wind                    | Howarth, Anthony                  | Anthony Howarth     | tt0075052 |
| 1746218691 | 1970 | 1970 | The Vampire Lovers                   | The Vampire Lovers                    | Baker, Roy Ward                   | Roy Ward Baker      | tt0066518 |
| 1746218908 | 1973 | 1973 | An Eye for an Eye                    | An Eye for an Eye                     | Brown, Larry                      | Larry G. Brown      | tt0070572 |
| 1745341328 | 2009 | 2008 | Mutant Chronicles                    | Mutant Chronicles                     | Hunter, Simon                     | Simon Hunter        | tt0490181 |
| 1745342784 | 2010 | 2010 | In My Sleep                          | In My Sleep                           | Wolf, Allen                       | Allen Wolf          | tt0326965 |
| 1746410518 | 1988 | 1988 | Hero and the Terror                  | Hero and the Terror                   | Tannen, William                   | William Tannen      | tt0095296 |
| 1746219593 | 1979 | 1979 | Voices                               | Voices                                | Markowitz, Robert                 | Robert Markowitz    | tt0080103 |
| 1746203418 | 1970 | 1970 | Bigfoot                              | Bigfoot                               | Slatzer, Robert F.                | Robert F. Slatzer   | tt0065470 |
| 1746440091 | 1999 | 1998 | Dog Park                             | Dog Park                              | McCulloch, Bruce                  | Bruce McCulloch     | tt0129884 |
| 1745357617 | 2003 | 2003 | Valley of Tears                      | Valley of Tears                       | Perry, Hart                       | Hart Perry          | tt0360141 |
| 1745374583 | 2009 | 2009 | Moon                                 | Moon                                  | Jones, Duncan                     | Alessandro Squitti  | tt1989615 |
| 1746202652 | 1970 | 1970 | Zorns Lemma                          | Zorns Lemma                           | Frampton, Hollis                  | Hollis Frampton     | tt0131149 |
| 1745272668 | 2000 | 2000 | Whispers: An Elephant's Tale         | Whispers: An Elephant's Tale          | Joubert, Dereck                   | Dereck Joubert      | tt0185007 |
| 1746420869 | 1995 | 1995 | ...And the Earth Did Not Swallow Him | ...And the Earth Did Not Swallow Him  | Perez, Severo                     | Severo Perez        | tt0108999 |

|            |      |      |                                          |                                          |                       |                        |           |
|------------|------|------|------------------------------------------|------------------------------------------|-----------------------|------------------------|-----------|
| 1745359044 | 2008 | 2007 | Towelhead                                | Towelhead                                | Ball, Alan            | Alan Ball              | tt0787523 |
| 1746218723 | 1974 | 1975 | He Is My Brother                         | He Is My Brother                         | Dmytryk, Edward       | Edward Dmytryk         | tt0132206 |
| 1745342674 | 2008 | 2008 | Ezra                                     | Era                                      | Aduaka, Newton I.     | Jonathan Whittle       | tt1377148 |
| 1746234995 | 1973 | 1972 | Together for Days                        | Together for Days                        | Schultz, Michael      | Michael Schultz        | tt0202001 |
| 1746209606 | 1970 | 1970 | Pussycat, Pussycat, I Love You           | Pussycat, Pussycat, I Love You           | Amateau, Rod          | Rod Amateau            | tt0066260 |
| 1745302714 | 2006 | 2005 | Puzzlehead                               | Puzzlehead                               | Bai, James            | James Bai              | tt0450367 |
| 1746248824 | 1975 | 1975 | Distance                                 | Distance                                 | Lover, Anthony        | Anthony Lover          | tt0072883 |
| 1746235381 | 1974 | 1974 | Zandy's Bride                            | Zandy's Bride                            | Troell, Jan           | Jan Troell             | tt0072435 |
| 1746257764 | 1977 | 1977 | Catastrophe                              | Catastrophe                              | Savadove, Larry       | Larry Savadove         | tt0075818 |
| 1745309213 | 2006 | 2006 | The Guardian                             | The Guardian                             | Davis, Andrew         | Mark J. Doddy          | tt0462326 |
| 1745303156 | 2005 | 2005 | Unleashed                                | Unleashed                                | Letierrier, Louis     | Louis Letierrier       | tt0342258 |
| 1745342821 | 2010 | 2010 | Blue Valentine                           | Blue Valentine                           | Cianfrance, Derek     | Derek Cianfrance       | tt1120985 |
| 1745374455 | 2002 | 2001 | The Barrio Murders                       | The Barrio Murders                       | Henrickson, Jojo      | JoJo Henrickson        | tt0308006 |
| 1746437614 | 1995 | 1995 | Frankie Starlight                        | Frankie Starlight                        | Lindsay-Hogg, Michael | Michael Lindsay        | tt0113107 |
| 1745358991 | 2008 | 2008 | Mirrors                                  | Mirrors                                  | Aja, Alexandre        | Horst Dieter Baum      | tt2319943 |
| 1746250750 | 1979 | 1979 | Going in Style                           | Going in Style                           | Brest, Martin         | Martin Brest           | tt0079219 |
| 1746256585 | 1975 | 1974 | The Wrestler                             | The Wrestler                             | Westman, Jim          | James A. Westman       | tt0070930 |
| 1746250984 | 1976 | 1976 | Secret of Navajo Cave                    | The Secret of Navajo Cave                | Flocker, James T.     | James T. Flocker       | tt0075180 |
| 1746438087 | 1998 | 1998 | No Looking Back                          | No Looking Back                          | Burns, Edward         | Edward Burns           | tt0119560 |
| 1746219375 | 1980 | 1980 | A Change of Seasons                      | A Change of Seasons                      | Lang, Richard         | Richard Lang           | tt0080515 |
| 1746270830 | 1978 | 1977 | The Amsterdam Kill                       | The Amsterdam Kill                       | Clouse, Robert        | Robert Clouse          | tt0075677 |
| 1746422525 | 1999 | 1999 | Miss Julie                               | Miss Julie                               | Figgis, Mike          | Mike Figgis            | tt0189744 |
| 1746421563 | 1995 | 1995 | Philosophy in the Bedroom                | Philosophy in the Bedroom                | Guzman, Tony          | Tony Guzman            | tt0318561 |
| 1745272483 | 2000 | 1999 | Louis Prima: The Wildest!                | Louis Prima: The Wildest!                | McGlynn, Don          | Don McGlynn            | tt0219142 |
| 1746235681 | 1973 | 1973 | The Offence                              | The Offence                              | Lumet, Sidney         | Sidney Lumet           | tt0070468 |
| 1746210713 | 1972 | 1972 | Mister Brown                             | Mister Brown                             | Andrieux, Roger       | Roger Andrieux         | tt0070397 |
| 1746433532 | 1991 | 1991 | Kiss Me a Killer                         | Kiss Me a Killer                         | De Leon, Marcus       | Marcus DeLeon          | tt0102221 |
| 1746219748 | 1978 | 1978 | Rabbit Test                              | Rabbit Test                              | Rivers, Joan          | Joan Rivers            | tt0078133 |
| 1746455036 | 1998 | 1997 | The Big One                              | The Big One                              | Moore, Michael        | Michael Moore          | tt0124295 |
| 1746235290 | 1979 | 1979 | Fast Charlie...The Moonbeam Rider        | Fast Charlie... the Moonbeam Rider       | Carver, Steve         | Steve Carver           | tt0079137 |
| 1745272203 | 2000 | 2000 | Boricua's Bond                           | Boricua's Bond                           | Lik, Val              | Val Lik                | tt0217287 |
| 1745342699 | 2001 | 2001 | Kill Me Later                            | Kill Me Later                            | Lustig, Dana          | Dana Lustig            | tt0243595 |
| 1745322654 | 2007 | 2006 | G.I. Jesus                               | G.I. Jesus                               | Colpaert, Carl        | Carl Colpaert          | tt0479042 |
| 1745342474 | 2003 | 2003 | The Order                                | Older                                    | Helgeland, Brian      | Vicki Speegle          | tt1432963 |
| 1746455721 | 1997 | 1997 | The Winter Guest                         | The Winter Guest                         | Rickman, Alan         | Alan Rickman           | tt0120521 |
| 1745340504 | 2004 | 2003 | Swimming Upstream                        | Swimming Upstream                        | Emery, Robert J.      | Russell Mulcahy        | tt0326664 |
| 1745374708 | 2011 | 2010 | Phillip the Fossil                       | Phillip the Fossil                       | Donovan, Garth        | Garth Donovan          | tt1597091 |
| 1746210940 | 1970 | 1970 | Tell Me That You Love Me, Junie Moon     | Tell Me That You Love Me, Junie Moon     | Preminger, Otto       | Otto Preminger         | tt0066445 |
| 1746258507 | 1977 | 1977 | Roseland                                 | Roseland                                 | Ivory, James          | James Ivory            | tt0076639 |
| 1746409457 | 1985 | 1985 | King David                               | King David                               | Beresford, Bruce      | Bruce Beresford        | tt0089420 |
| 1746419397 | 1982 | 1982 | That Championship Season                 | That Championship Season                 | Miller, Jason         | Jason Miller           | tt0084784 |
| 1745372834 | 2009 | 2009 | Cirque du Freak: The Vampire's Assistant | Cirque du Freak: The Vampire's Assistant | Weitz, Paul           | Paul Weitz             | tt0450405 |
| 1745341447 | 2010 | 2010 | Knucklehead                              | Knucklehead                              | Watkins, Michael W.   | Michael W. Watkins     | tt1524131 |
| 1746210078 | 1970 | 1970 | Blood Mania                              | Blood Mania                              | O'Neil, Robert V.     | Robert Vincent O'Neill | tt0065478 |
| 1746454578 | 2000 | 2000 | The Amati Girls                          | The Amati Girls                          | DeSalvo, Anne         | Anne De Salvo          | tt0213446 |
| 1745272246 | 2000 | 2000 | Surviving Paradise                       | Surviving Paradise                       | Kooshan, Kamshad      | Kamshad Kooshan        | tt0216250 |
| 1745395118 | 2009 | 2008 | As Seen Through These Eyes               | As Seen Through These Eyes               | Helstein, Hilary      | Hilary Helstein        | tt0902256 |
| 1746455679 | 1995 | 1995 | The Hunted                               | The Hunted                               | Lawton, J. F.         | J.F. Lawton            | tt0113360 |
| 1746410699 | 1994 | 1994 | A Simple Twist of Fate                   | A Simple Twist of Fate                   | MacKinnon, Gillies    | Gillies MacKinnon      | tt0111194 |
| 1746235682 | 1976 | 1976 | A Matter of Time                         | A Matter of Time                         | Minnelli, Vincente    | Vincente Minnelli      | tt0074878 |
| 1746410847 | 1992 | 1992 | The Importance of Being Earnest          | The Importance of Being Earnest          | Baker, Kurt           | Kurt Baker             | tt0102102 |
| 1746210646 | 1972 | 1972 | Ulzana's Raid                            | Ulzana's Raid                            | Aldrich, Robert       | Robert Aldrich         | tt0069436 |
| 1745374784 | 2010 | 2010 | Inhale                                   | Inhale                                   | Kormákur, Baltasar    | Baltasar Kormákur      | tt1196340 |
| 1745358499 | 2008 | 2008 | 10,000 BC                                | 10,000 BC                                | Emmerich, Roland      | Roland Emmerich        | tt0443649 |
| 1746209829 | 1970 | 1970 | Thumbelina                               | Thumbelina                               | Mahon, Barry          | Barry Mahon            | tt0134149 |
| 1746437579 | 1999 | 1999 | Speaking in Strings                      | Speaking in Strings                      | di Florio, Paola      | Paola di Florio        | tt0181835 |
| 1746410885 | 1990 | 1989 | The Feud                                 | The Feud                                 | D'Elia, Bill          | Bill D'Elia            | tt0097350 |

|            |      |      |                                     |                                     |                                       |                           |           |
|------------|------|------|-------------------------------------|-------------------------------------|---------------------------------------|---------------------------|-----------|
| 1746392700 | 1983 | 1983 | Gospel                              | Gospel                              | Leivick, David; Ritzenberg, Frederick | David Leivick             | tt0162351 |
| 1746235299 | 1977 | 1976 | Sweet Revenge                       | Sweet Revenge                       | Schatzberg, Jerry                     | Jerry Schatzberg          | tt0076789 |
| 1746272833 | 1978 | 1978 | Almost Summer                       | Almost Summer                       | Davidson, Martin                      | Martin Davidson           | tt0077152 |
| 1745394123 | 2010 | 2010 | Rabbit Hole                         | Rabbit Hole                         | Mitchell, John Cameron                | John Cameron Mitchell     | tt0935075 |
| 1769974317 | 1972 | 1971 | A Touch of Satan                    | The Touch of Satan                  | Henderson, Don                        | Don Henderson             | tt0066476 |
| 1745342224 | 2003 | 2002 | The Dancer Upstairs                 | The Dancer Upstairs                 | Malkovich, John                       | John Malkovich            | tt0118926 |
| 1746251019 | 1976 | 1976 | Death Collector                     | The Death Collector                 | De Vito, Ralph                        | Ralph De Vito             | tt0072855 |
| 1746408879 | 1987 | 1987 | Blue Monkey                         | Blue Monkey                         | Fruet, William                        | William Fruet             | tt0092677 |
| 1746435920 | 1989 | 1989 | Fat Man and Little Boy              | Fat Man and Little Boy              | Joffé, Roland                         | Roland Joffé              | tt0097336 |
| 1746455134 | 1999 | 1999 | Jakob the Liar                      | Jakob the Liar                      | Kassovitz, Peter                      | Peter Kassovitz           | tt0120716 |
| 1746235708 | 1973 | 1973 | The Deadly Trackers                 | The Deadly Trackers                 | Shear, Barry                          | Barry Shear               | tt0069951 |
| 1746210689 | 1973 | 1973 | Fleshpot on 42nd Street             | Fleshpot on 42nd Street             | Milligan, Andy                        | Andy Milligan             | tt0062980 |
| 1746234784 | 1971 | 1971 | Shoot Out                           | Shoot Out                           | Hathaway, Henry                       | Henry Hathaway            | tt0067750 |
| 1746455911 | 1996 | 1996 | Ed's Next Move                      | Ed's Next Move                      | Walsh, John                           | John Walsh                | tt0116167 |
| 1746421581 | 1992 | 1991 | Shadows and Fog                     | Shadows and Fog                     | Allen, Woody                          | Woody Allen               | tt0105378 |
| 1746420082 | 1989 | 1989 | The Iron Triangle                   | The Iron Triangle                   | Weston, Eric                          | Eric Weston               | tt0097593 |
| 1745342929 | 2009 | 2009 | We Live in Public                   | We Live in Public                   | Timoner, Ondi                         | Ondi Timoner              | tt0498329 |
| 1746419577 | 1992 | 1991 | The Human Shield                    | The Human Shield                    | Post, Ted                             | Ted Post                  | tt0102072 |
| 1745374136 | 2001 | 2000 | Dinner Rush                         | Dinner Rush                         | Giraldi, Bob                          | Bob Giraldi               | tt0229340 |
| 1746410893 | 1988 | 1988 | Jack's Back                         | Jack's Back                         | Herrington, Rowdy                     | Rowdy Herrington          | tt0095389 |
| 1746439736 | 2000 | 2000 | Blue Moon                           | Blue Moon                           | Gallagher, John                       | John A. Gallagher         | tt0225196 |
| 1746198184 | 1969 | 1970 | Image, Flesh and Voice              | Image, Flesh and Voice              | Emshwiller, Ed                        | Ed Emshwiller             | tt0197574 |
| 1746218800 | 1975 | 1975 | Breakout                            | Breakout                            | Gries, Tom                            | Tom Gries                 | tt0072737 |
| 1746410868 | 1993 | 1992 | Nemesis                             | Nemesis                             | Pyun, Albert                          | Albert Pyun               | tt0107668 |
| 1746438564 | 1998 | 1998 | Slam                                | Slam                                | Levin, Marc                           | Marc Levin                | tt0139615 |
| 1746410219 | 1986 | 1986 | Born American                       | Born American                       | Harlin, Renny                         | Renny Harlin              | tt0091313 |
| 1746410664 | 1988 | 1988 | "Crocodile" Dundee II               | Crocodile Dundee II                 | Cornell, John                         | John Cornell              | tt0092493 |
| 1745293625 | 2007 | 2007 | Bad Land                            | Bad Land                            | Lucente, Francesco                    |                           | tt1020869 |
| 1745272495 | 2000 | 1999 | Smiling Fish and Goat on Fire       | Smiling Fish & Goat on Fire         | Jordan, Kevin                         | Kevin Jordan              | tt0162348 |
| 1746419156 | 1982 | 1982 | Barbarosa                           | Barbarosa                           | Schepisi, Fred                        | Fred Schepisi             | tt0083619 |
| 1746512858 | 1923 | 1923 | Western Blood                       | Western Blood                       | Hunter, Robert                        | Robert Hunter             | tt0177380 |
| 1745340104 | 2003 | 2003 | Wrong Turn                          | Wrong Turn                          | Schmidt, Rob                          | Steve Danton              | tt0385346 |
| 1745293604 | 2007 | 2006 | The Salon                           | Talon                               | Brown, Mark                           | Dan Eason                 | tt1423438 |
| 1746235424 | 1978 | 1978 | Death Force                         | Death Force                         | Santiago, Cirio H.                    | Cirio H. Santiago         | tt0076024 |
| 1745358657 | 2004 | 2003 | The Singing Forest                  | The Singing Forest                  | Ameer, Jorge                          | Jorge Ameer               | tt0327153 |
| 1746219354 | 1971 | 1971 | The Resurrection of Zachary Wheeler | The Resurrection of Zachary Wheeler | Wynn, Bob                             | Bob Wynn                  | tt0067669 |
| 1746408506 | 1991 | 1991 | Delusion                            | Delusion                            | Colpaert, Carl                        | Carl Colpaert             | tt0101704 |
| 1746258215 | 1977 | 1976 | Crash!                              | Crash!                              | Band, Charles                         | Charles Band              | tt0075887 |
| 1746422211 | 1990 | 1989 | Face of the Enemy                   | Face of the Enemy                   | Ildari, Hassan                        | Hassan Ildari             | tt0097323 |
| 1746409699 | 1988 | 1987 | Retribution                         | Retribution                         | Magar, Guy                            | Guy Magar                 | tt0095984 |
| 1746423350 | 1992 | 1992 | Wild Wheels                         | Wild Wheels                         | Blank, Harrod                         | Harrod Blank              | tt0105821 |
| 1745342468 | 2003 | 2002 | Man of the Year                     | Man of the Year                     | Weisman, Straw                        | Straw Weisman             | tt0319803 |
| 1746435911 | 1999 | 1999 | The Loss of Sexual Innocence        | The Loss of Sexual Innocence        | Figgis, Mike                          | Mike Figgis               | tt0126859 |
| 1746218887 | 1973 | 1973 | The Bride                           | The Bride                           | Péliezzi, Jean-Marie                  | Jean                      | tt0071626 |
| 1746410643 | 1991 | 1990 | Mindwalk                            | Mindwalk                            | Capra, Bernt                          | Bernt Amadeus Capra       | tt0100151 |
| 1746410745 | 1994 | 1993 | Dream Lover                         | Dream Lover                         | Kazan, Nicholas                       | Nicholas Kazan            | tt0109665 |
| 1746219027 | 1976 | 1975 | Loose Ends                          | Loose Ends                          | Morris, David Burton; Wozniak, Victor | David Burton Morris       | tt0074817 |
| 1746410132 | 1984 | 1984 | Until September                     | Until September                     | Marquand, Richard                     | Richard Marquand          | tt0088330 |
| 1746578817 | 1960 | 1960 | The Cape Canaveral Monsters         | The Cape Canaveral Monsters         | Tucker, Phil                          | Phil Tucker               | tt0053692 |
| 1746440001 | 1995 | 1995 | Raging Angels                       | Raging Angels                       | Smithee, Alan                         | Alan Smithee              | tt0114226 |
| 1746250969 | 1975 | 1974 | The House on Skull Mountain         | The House on Skull Mountain         | Honthaner, Ron                        | Ron Honthaner             | tt0071629 |
| 1745359357 | 2010 | 2009 | Like Dandelion Dust                 | Like Dandelion Dust                 | Gunn, Jon                             | Jon Gunn                  | tt0981042 |
| 1746210954 | 1972 | 1972 | Pickup on 101                       | Pickup on 101                       | Florea, John                          | John Florea               | tt0069084 |
| 1746420758 | 1993 | 1993 | Me and the Kid                      | Me and the Kid                      | Curtis, Dan                           | Dan Curtis                | tt0081145 |
| 1745272324 | 2000 | 1999 | Suckerfish                          | Suckerfish                          | Burroughs, Brien                      | Brien Burroughs           | tt0193535 |
| 1745374509 | 2001 | 2000 | Lost in the Pershing Point Hotel    | Lost in the Pershing Point Hotel    | Pierrepoint, Julia Jay                | Julia Jay Pierrepoint III | tt0201737 |
| 1746393113 | 1988 | 1988 | Far North                           | Far North                           | Shepard, Sam                          | Sam Shepard               | tt0095135 |

|            |      |      |                                            |                                            |                        |                       |           |
|------------|------|------|--------------------------------------------|--------------------------------------------|------------------------|-----------------------|-----------|
| 2007989477 | 1984 | 1984 | Electric Dreams                            | Electric Dreams                            | Barron, Steve          | Steve Barron          | tt0087197 |
| 1746219659 | 1971 | 1971 | Going Home                                 | Going Home                                 | Leonard, Herbert B.    | Herbert B. Leonard    | tt0067146 |
| 1745340511 | 2004 | 2004 | A Day Without a Mexican                    | A Day Without a Mexican                    | Arau, Sergio           | Sergio Arau           | tt0377744 |
| 1746251342 | 1978 | 1978 | Towing                                     | Towing                                     | Smith, Maura           | Maura Smith           | tt0199101 |
| 1745395962 | 2010 | 2009 | The Exploding Girl                         | The Exploding Girl                         | Gray, Bradley Rust     | Bradley Rust Gray     | tt1294161 |
| 1745359740 | 2009 | 2009 | The Perfect Sleep                          | The Perfect Sleep                          | Alter, Jeremy          | Jeremy Alter          | tt0435716 |
| 1746393989 | 1988 | 1988 | Little Nikita                              | Little Nikita                              | Benjamin, Richard      | Richard Benjamin      | tt0095532 |
| 1746409491 | 1991 | 1990 | Mister Johnson                             | Mister Johnson                             | Beresford, Bruce       | Bruce Beresford       | tt0102458 |
| 1746455081 | 1996 | 1996 | Entertaining Angels: The Dorothy Day Story | Entertaining Angels: The Dorothy Day Story | Rhodes, Michael R.     | Michael Ray Rhodes    | tt0116212 |
| 1745358643 | 2009 | 2008 | Herb & Dorothy                             | Herb & Dorothy                             | Sasaki, Megumi         | Megumi Sasaki         | tt1227929 |
| 1746409334 | 1985 | 1985 | Evils of the Night                         | Evils of the Night                         | Rustam, Mardi          | Mohammed Rustam       | tt0089109 |
| 1746235313 | 1975 | 1975 | Drifter                                    | Drifter                                    | Rocco, Pat             | Pat Rocco             | tt0072909 |
| 1745358670 | 2001 | 2001 | Gangland                                   | Gangland                                   | Camacho, Art           | Art Camacho           | tt0265198 |
| 1746410587 | 1992 | 1992 | Lost Prophet                               | Lost Prophet                               | De Avila, Michael      | Michael De Avila      | tt0104758 |
| 1746409339 | 1992 | 1992 | The Panama Deception                       | The Panama Deception                       | Trent, Barbara         | Barbara Trent         | tt0105089 |
| 1746440230 | 1999 | 1999 | One Man's Hero                             | One Man's Hero                             | Hool, Lance            | Lance Hool            | tt0120775 |
| 1746248793 | 1978 | 1978 | The Children of Sanchez                    | The Children of Sanchez                    | Bartlett, Hall         | Hall Bartlett         | tt0077326 |
| 1745341758 | 2010 | 2009 | The Greatest                               | The Greatest                               | Feste, Shana           | Shana Feste           | tt1226232 |
| 1746393283 | 1987 | 1986 | Sleepwalk                                  | Sleepwalk                                  | Driver, Sara           | Sara Driver           | tt0091971 |
| 1745302501 | 2005 | 2005 | Brooklyn Lobster                           | Brooklyn Lobster                           | Jordan, Kevin          | Kevin Jordan          | tt0401591 |
| 1746235101 | 1976 | 1976 | Black Shampoo                              | Black Shampoo                              | Clark, Greydon         | Greydon Clark         | tt0074214 |
| 1746437574 | 1999 | 1999 | Twin Falls Idaho                           | Twin Falls Idaho                           | Polish, Michael        | Michael Polish        | tt0162830 |
| 1745359141 | 2009 | 2009 | Ink                                        | In                                         | Winans, Jamin          | Ted Knighton          | tt4763188 |
| 1745359862 | 2002 | 2002 | New Best Friend                            | New Best Friend                            | Clarke-Williams, Zoe   | Zoe Clarke            | tt0191074 |
| 1746438054 | 1996 | 1996 | Alaska                                     | Alaska                                     | Heston, Fraser C.      | Fraser C. Heston      | tt0115493 |
| 1769974207 | 1970 | 1970 | Janie                                      | Janie                                      | Bravman, Jack          | Looney Bear           | tt0130039 |
| 1745372824 | 2010 | 2010 | Blood Done Sign My Name                    | Blood Done Sign My Name                    | Stuart, Jeb            | Jeb Stuart            | tt1210039 |
| 1746259637 | 1978 | 1978 | The Other Side of the Mountain Part II     | The Other Side of the Mountain: Part II    | Peerce, Larry          | Larry Peerce          | tt0078044 |
| 1746235069 | 1975 | 1975 | Lord Shango                                | Lord Shango                                | Marsh, Ray             | Ray Marsh             | tt0173990 |
| 1746202596 | 1970 | 1970 | Sweet Vengeance                            | Sweet Vengeance                            | Chaudhri, Amin         | Amin Q. Chaudhri      | tt0228912 |
| 1746393168 | 1985 | 1985 | Hellhole                                   | Hellhole                                   | De Moro, Pierre        | Pierre De Moro        | tt0089269 |
| 1746410159 | 1986 | 1986 | Spiker                                     | Spiker                                     | Tilton, Roger          | Roger Tilton          | tt0091995 |
| 1746210589 | 1973 | 1973 | The Harrad Experiment                      | The Harrad Experiment                      | Post, Ted              | Ted Post              | tt0070157 |
| 1746210560 | 1970 | 1970 | Angel Unchained                            | Angel Unchained                            | Madden, Lee            | Lee Madden            | tt0065401 |
| 1746455619 | 1996 | 1996 | The Darien Gap                             | The Darien Gap                             | Anderson, Brad         | Brad Anderson         | tt0112803 |
| 1746394504 | 1985 | 1985 | Tomboy                                     | Tomboy                                     | Freed, Herb            | Herb Freed            | tt0090184 |
| 1745359926 | 2004 | 2004 | The Aryan Couple                           | The Aryan Couple                           | Daly, John             | John Daly             | tt0407536 |
| 1746209787 | 1970 | 1970 | End of the Road                            | End of the Road                            | Avakian, Aram          | Aram Avakian          | tt0065692 |
| 1746420992 | 1989 | 1989 | Sexbomb                                    | Sexbomb                                    | Broadstreet, Jeff      | Jeff Broadstreet      | tt0244786 |
| 1746257807 | 1980 | 1980 | Night Games                                | Night Games                                | Vadim, Roger           | Roger Vadim           | tt0081228 |
| 1746423748 | 1992 | 1992 | Wind                                       | Wind                                       | Ballard, Carroll       | Carroll Ballard       | tt0105824 |
| 1746219170 | 1974 | 1973 | The Three Musketeers                       | The Three Musketeers                       | Lester, Richard        | Richard Lester        | tt0072281 |
| 1745340072 | 2003 | 2003 | Green Card Fever                           | Green Card Fever                           | Rajasekharuni, Bala    | Bala Rajasekharuni    | tt0292527 |
| 1746219130 | 1976 | 1976 | Getting Together                           | Getting Together                           | Secter, David          | David Secter          | tt0198512 |
| 1746408862 | 1989 | 1989 | Welcome Home                               | Welcome Home                               | Schaffner, Franklin J. | Franklin J. Schaffner | tt0098631 |
| 1746235058 | 1980 | 1980 | The Hollywood Knights                      | The Hollywood Knights                      | Mutrux, Floyd          | Floyd Mutrux          | tt0080881 |
| 1746218892 | 1973 | 1973 | Tom                                        | Tom                                        | Clark, Greydon         | Greydon Clark         | tt0130488 |
| 1746235514 | 1977 | 1976 | Guardian of the Wilderness                 | Guardian of the Wilderness                 | O'Malley, David        | David O'Malley        | tt0076415 |
| 1746455111 | 1995 | 1994 | River of Grass                             | River of Grass                             | Reichardt, Kelly       | Kelly Reichardt       | tt0110998 |
| 1746394700 | 1991 | 1990 | American Ninja 4: The Annihilation         | American Ninja 4: The Annihilation         | Sundstrom, Cedric      | Cedric Sundstrom      | tt0101326 |
| 1746455052 | 1994 | 1994 | The Lost Words                             | The Lost Words                             | Saunders, Scott        | Scott Saunders        | tt0110385 |
| 1746435024 | 1990 | 1990 | Memphis Belle                              | Memphis Belle                              | Caton-Jones, Michael   | Michael Caton         | tt0100133 |
| 1745396483 | 2010 | 2010 | The Way Back                               | The Way Back                               | Weir, Peter            | Peter Weir            | tt1023114 |
| 1746210859 | 1970 | 1970 | It's Your Thing                            | It's Your Thing                            | Gargiulo, Mike         | Mike Gargiulo         | tt0196649 |
| 1746410719 | 1992 | 1992 | Double Edge                                | Double Edge                                | Kollek, Amos           | Steve Stafford        | tt0104130 |
| 1746420902 | 1994 | 1994 | Risk                                       | At Risk                                    | Fishel, Deirdre        | Elana Krausz          | tt0109165 |
| 1746410679 | 1990 | 1990 | Death Warrant                              | Death Warrant                              | Sarafian, Deran        | Deran Sarafian        | tt0099385 |

|            |      |      |                                                    |                                                   |                                    |                        |           |
|------------|------|------|----------------------------------------------------|---------------------------------------------------|------------------------------------|------------------------|-----------|
| 1746256812 | 1975 | 1975 | The Return of the Pink Panther                     | The Return of the Pink Panther                    | Edwards, Blake                     | Blake Edwards          | tt0072081 |
| 1745341825 | 2009 | 2009 | Brothers at War                                    | Brothers at War                                   | Rademacher, Jake                   | Jake Rademacher        | tt1239427 |
| 1745357944 | 2010 | 2010 | Joan Rivers: A Piece of Work                       | Joan Rivers: A Piece of Work                      | Stern, Ricki ; Sundberg, Annie     | Ricki Stern            | tt1568150 |
| 1746393231 | 1985 | 1986 | 16 Days of Glory                                   | 16 Days of Glory                                  | Greenspan, Bud                     | Bud Greenspan          | tt0090559 |
| 1746410666 | 1989 | 1989 | It Had to Be You                                   | It Had to Be You                                  | Taylor, Renée; Bologna, Joseph     | Joseph Bologna         | tt0097600 |
| 1746410448 | 1989 | 1989 | Cage                                               | Cage                                              | Elliott, Lang                      | Lang Elliott           | tt0097003 |
| 1746434365 | 1998 | 1998 | Les Misérables                                     | Les Misérables                                    | August, Bille                      | Bille August           | tt0119683 |
| 1745357895 | 2010 | 2009 | Why Am I Doing This?                               | Why Am I Doing This?                              | Huang, Tom                         | Tom Huang              | tt1125413 |
| 1746409259 | 1987 | 1987 | Full Metal Jacket                                  | Full Metal Jacket                                 | Kubrick, Stanley                   | Stanley Kubrick        | tt0093058 |
| 1746420227 | 1987 | 1987 | Summer Heat                                        | Summer Heat                                       | Gleason, Michie                    | Michie Gleason         | tt0094071 |
| 1746422517 | 1994 | 1994 | Foreign Student                                    | Foreign Student                                   | Sereny, Eva                        | Eva Sereny             | tt0109828 |
| 1745359814 | 2010 | 2010 | Edge of Darkness                                   | Edge of Darkness                                  | Campbell, Martin                   | Martin Campbell        | tt1226273 |
| 1745340011 | 2003 | 2003 | Veronica Guerin                                    | Veronica Guerin                                   | Schumacher, Joel                   | Joel Schumacher        | tt0312549 |
| 1745309440 | 2007 | 2006 | The Prisoner, Or: How I Planned to Kill Tony Blair | The Prisoner or: How I Planned to Kill Tony Blair | Tucker, Michael; Epperlein, Petra  | Petra Epperlein        | tt0841149 |
| 1746211042 | 1972 | 1972 | Asylum                                             | Asylum                                            | Robinson, Peter                    | Peter Robinson         | tt0775421 |
| 1745372900 | 2009 | 2009 | Spread                                             | Spread                                            | MacKenzie, David                   | David Mackenzie        | tt1186370 |
| 1746421151 | 1991 | 1991 | No Secrets                                         | No Secrets                                        | Magyar, Dezso                      | Dezső Magyar           | tt0102543 |
| 1745309174 | 2007 | 2006 | In Between Days                                    | In Between Days                                   | Kim, So Yong                       | So Yong Kim            | tt0492463 |
| 1746454002 | 1997 | 1997 | In the Company of Men                              | In the Company of Men                             | LaBute, Neil                       | Neil LaBute            | tt0119361 |
| 1746210643 | 1971 | 1971 | Kotch                                              | Kotch                                             | Lemmon, Jack                       | Jack Lemmon            | tt0067314 |
| 1746219361 | 1979 | 1979 | Billy in the Lowlands                              | Billy in the Lowlands                             | Egleson, Jan                       | Jan Egleson            | tt0078864 |
| 1746257368 | 1977 | 1977 | The Farmer                                         | The Farmer                                        | Berlatsky, David                   | David Berlatsky        | tt0072975 |
| 1746210655 | 1972 | 1972 | The Heartbreak Kid                                 | The Heartbreak Kid                                | May, Elaine                        | Elaine May             | tt0068687 |
| 1746235559 | 1979 | 1979 | Boardwalk                                          | Boardwalk                                         | Verona, Stephen                    | Stephen Verona         | tt0078886 |
| 1746269495 | 1980 | 1980 | Little Miss Marker                                 | Little Miss Marker                                | Bernstein, Walter                  | Walter Bernstein       | tt0081063 |
| 1745272761 | 2000 | 1999 | The Waiting Game                                   | The Waiting Game                                  | Liotti, Ken                        | Ken Liotti             | tt0235872 |
| 1746410809 | 1988 | 1988 | The Wizard of Loneliness                           | The Wizard of Loneliness                          | Bowen, Jenny                       | Jenny Bowen            | tt0096455 |
| 1746235358 | 1976 | 1976 | The Commitment                                     | The Commitment                                    | Grand, Richard; Shaffner, Louis A. | Richard Grand          | tt0181403 |
| 1745293562 | 2007 | 2007 | This Christmas                                     | This Christmas                                    | Whitmore, Preston A.               | Preston A. Whitmore II | tt0937375 |
| 1746421283 | 1993 | 1993 | The Night We Never Met                             | The Night We Never Met                            | Leight, Warren                     | Warren Leight          | tt0107685 |
| 1746210181 | 1970 | 1970 | The Man From O. R. G. Y.                           | The Man from O.R.G.Y.                             | Hill, James A.                     | James Hill             | tt0066056 |
| 1746219094 | 1972 | 1972 | Travels with My Aunt                               | Travels with My Aunt                              | Cukor, George                      | George Cukor           | tt0069404 |
| 1745395958 | 2011 | 2010 | Sympathy for Delicious                             | Sympathy for Delicious                            | Ruffalo, Mark                      | Mark Ruffalo           | tt1270277 |
| 1769973190 | 1970 | 1970 | The Ravager                                        | The Ravager                                       | Nizet, Charles                     | Charles Nizet          | tt0066285 |
| 1745373339 | 2010 | 2010 | Guns Drugs and Dirty Money                         | Guns, Drugs and Dirty Money                       | Anton, John                        | John Anton             | tt0464032 |
| 1745341258 | 2010 | 2010 | Barry Munday                                       | Barry Munday                                      | D'Arienzo, Chris                   | Chris D'Arienzo        | tt0482461 |
| 1745341308 | 2001 | 2001 | Lift                                               | Lift                                              | Davis, DeMane; Streeter, Khari     | DeMane Davis           | tt0246037 |
| 1746211075 | 1970 | 1970 | Pieces of Dreams                                   | Pieces of Dreams                                  | Haller, Daniel                     | Daniel Haller          | tt0066222 |
| 1745303082 | 2005 | 2005 | The Libertine                                      | The Libertines                                    | Dunmore, Laurence                  | Jonathan Wolding       | tt0484361 |
| 1745358537 | 2010 | 2009 | Last Day of Summer                                 | Last Day of Summer                                | Yudin, Vlad                        | Vlad Yudin             | tt1242544 |
| 1746410880 | 1988 | 1988 | Stars and Bars                                     | Stars and Bars                                    | O'Connor, Pat                      | Pat O'Connor           | tt0096166 |
| 1769973233 | 1970 | 1970 | The Midnight Graduate                              | The Midnight Graduate                             | Brown, Don                         | Don Brown              | tt0154874 |
| 1745302869 | 2006 | 2006 | All the King's Men                                 | All the King's Men                                | Zaillian , Steven                  | Steven Zaillian        | tt0405676 |
| 1746208191 | 1970 | 1970 | The Phynx                                          | The Phynx                                         | Katzin, Lee H.                     | Lee H. Katzin          | tt0066221 |
| 1745293843 | 2007 | 2006 | Crazy Eights                                       | Crazy Eights                                      | Jones, James Koya                  | Jimi Jones             | tt0470993 |
| 1746410582 | 1988 | 1988 | A New Life                                         | A New Life                                        | Alda, Alan                         | Alan Alda              | tt0095726 |
| 1746269779 | 1978 | 1978 | Nunzio                                             | Nunzio                                            | Williams, Paul                     | Paul Williams          | tt0078011 |
| 1745272158 | 2000 | 2000 | One                                                | The Hole                                          | Barbieri, Tony                     | Jin Ishimoto           | tt0275405 |
| 1746434038 | 1990 | 1989 | Sonny Boy                                          | Sonny Boy                                         | Carroll, Robert Martin             | Robert Martin Carroll  | tt0100661 |
| 1746410427 | 1982 | 1982 | The Personals                                      | The Personals                                     | Markle, Peter                      | Peter Markle           | tt0082898 |
| 1745302976 | 2006 | 2006 | Naked Beneath the Water                            | Naked Beneath the Water                           | Cain, Sean                         | Sean Cain              | tt0497419 |
| 1746435003 | 1991 | 1991 | Echoes That Remain                                 | Echoes That Remain                                |                                    | Arnold Schwartzman     | tt0331476 |
| 1746454968 | 2000 | 2000 | The Eyes of Tammy Faye                             | The Eyes of Tammy Faye                            | Bailey, Fenton ; Barbato, Randy    | Fenton Bailey          | tt0233687 |
| 1745358699 | 2002 | 2001 | Enigma                                             | Enigma                                            | Apted, Michael                     | Michael Apted          | tt0157583 |
| 1746455718 | 1997 | 1997 | Nowhere                                            | Nowhere                                           | Araki, Gregg                       | Gregg Araki            | tt0119809 |
| 1745294013 | 2006 | 2006 | The Great Warming                                  | The Great Warming                                 | Taylor, Michael                    |                        | tt0904079 |
| 1746235518 | 1975 | 1975 | Sidecar Racers                                     | Sidecar Racers                                    | Bellamy, Earl                      | Earl Bellamy           | tt0073709 |

|            |      |      |                                              |                                           |                                 |                     |           |
|------------|------|------|----------------------------------------------|-------------------------------------------|---------------------------------|---------------------|-----------|
| 1745374479 | 2010 | 2010 | After Life                                   | Afterlife                                 | Wojtowicz-Vosloo, Agnieszka     | Eric St. John       | tt1650478 |
| 1745309436 | 2005 | 2005 | New York Doll                                | New York Doll                             | Whiteley, Greg                  | Greg Whiteley       | tt0436629 |
| 1745293225 | 2005 | 2005 | William Eggleston in the Real World          | William Eggleston in the Real World       | Almeryda, Michael               | Michael Almeryda    | tt0443698 |
| 1746419371 | 1989 | 1989 | Pink Cadillac                                | Pink Cadillac                             | Van Horn, Buddy                 | Buddy Van Horn      | tt0098097 |
| 1746454122 | 1998 | 1997 | David Searching                              | David Searching                           | Smith, Leslie L.                | Leslie L. Smith     | tt0132914 |
| 1746408507 | 1982 | 1982 | Jekyll and Hyde... Together Again            | Jekyll and Hyde... Together Again         | Belson, Jerry                   | Jerry Belson        | tt0084171 |
| 1746410143 | 1988 | 1988 | Stormy Monday                                | Stormy Monday                             | Figgis, Mike                    | Mike Figgis         | tt0096180 |
| 1745272562 | 2001 | 2001 | China: Tha Panda Adventure                   | China: The Panda Adventure                | Young, Robert M.                | Robert M. Young     | tt0255055 |
| 1745341586 | 2009 | 2008 | The Art of Being Straight                    | The Art of Being Straight                 | Rosen, Jesse                    | Jesse Rosen         | tt1222330 |
| 1745309505 | 2005 | 2005 | The Ballad of Jack and Rose                  | The Ballad of Jack and Rose               | Miller, Rebecca                 | Rebecca Miller      | tt0357110 |
| 1746421562 | 1992 | 1992 | Russia Today, A Peoples Journey to Democracy | Russia Today, a Peoples Journey to Democr | Eliopoulos, Nicholas            | Nicholas Eliopoulos | tt0331622 |
| 1746260685 | 1978 | 1978 | The Deer Hunter                              | The Deer Hunter                           | Cimino, Michael                 | Michael Cimino      | tt0077416 |
| 1745357608 | 2010 | 2010 | Jim                                          | Jim                                       | Morris-Burke, Jeremy            | Jeremy Morris       | tt1482889 |
| 1745357721 | 2001 | 2000 | The Operator                                 | The Operator                              | Dichter, Jon                    | Jon Dichter         | tt0163125 |
| 1746438193 | 1998 | 1998 | River Red                                    | River Red                                 | Drilling, Eric                  | Eric Drilling       | tt0158154 |
| 1746235804 | 1980 | 1979 | Best Boy                                     | Best Boy                                  | Wohl, Ira                       | Ira Wohl            | tt0078850 |
| 1746210677 | 1972 | 1972 | White Rat                                    | White Rat                                 | Mullen, Steve                   | Steven Mullin       | tt0298599 |
| 1746409025 | 1988 | 1988 | Kansas                                       | Kansas                                    | Stevens, David                  | David Stevens       | tt0095428 |
| 1746219046 | 1971 | 1971 | Zachariah                                    | Zachariah                                 | Englund, George                 | George Englund      | tt0068011 |
| 1746434262 | 1995 | 1995 | The Show                                     | The Show                                  | Robbins, Brian                  | Brian Robbins       | tt0114435 |
| 1746434342 | 1995 | 1994 | The Glass Shield                             | The Glass Shield                          | Burnett, Charles                | Charles Burnett     | tt0109906 |
| 1746248836 | 1974 | 1974 | Thomasine & Bushrod                          | Thomasine & Bushrod                       | Parks, Gordon                   | Gordon Parks Jr.    | tt0072278 |
| 1745357714 | 2004 | 2004 | The Cookout                                  | The Cookout                               | Rivera, Lance                   | Lance Rivera        | tt0380277 |
| 1745342057 | 2004 | 2004 | America's Heart and Soul                     | America's Heart & Soul                    | Schwartzberg, Louis             | Louie Schwartzberg  | tt0381006 |
| 1746235090 | 1978 | 1977 | Disco 9000                                   | Disco 9000                                | Martin, D'Urville               | D'Urville Martin    | tt0219646 |
| 1746210707 | 1970 | 1970 | My Sweet Charlie                             | My Sweet Charlie                          | Johnson, Lamont                 | Lamont Johnson      | tt0066114 |
| 1746454243 | 1997 | 1996 | Female Perversions                           | Female Perversions                        | Streitfeld, Susan               | Susan Streitfeld    | tt0116293 |
| 1746209922 | 1970 | 1970 | The Cockeyed Cowboys of Calico County        | Cockeyed Cowboys of Calico County         | Leader, Tony                    | Anton Leader        | tt0065560 |
| 1746421738 | 1997 | 1998 | Storefront Hitchcock                         | Storefront Hitchcock                      | Demme, Jonathan                 | Jonathan Demme      | tt0120219 |
| 1746235460 | 1978 | 1978 | The Big Sleep                                | The Big Sleep                             | Winner, Michael                 | Michael Winner      | tt0077234 |
| 1746453881 | 1999 | 1999 | The Third Miracle                            | The Third Miracle                         | Holland, Agnieszka              | Agnieszka Holland   | tt0174268 |
| 1746219197 | 1971 | 1971 | Red Sky at Morning                           | Red Sky at Morning                        | Goldstone, James                | James Goldstone     | tt0067659 |
| 1746419783 | 1993 | 1993 | Sex Is...                                    | Sex Is...                                 | Huestis, Marc                   | Marc Huestis        | tt0108090 |
| 1745374422 | 2004 | 2004 | Chasing Liberty                              | Chasing Liberty                           | Cadiff, Andy                    | Andy Cadiff         | tt0360139 |
| 1746455686 | 1999 | 1998 | Five Wives, Three Secretaries and Me         | Five Wives, Three Secretaries and Me      | Blake, Tessa                    | Tessa Blake         | tt0150574 |
| 1746219384 | 1976 | 1975 | Half a House                                 | Half a House                              | Mack, Brice                     | Brice Mack          | tt0074601 |
| 1746235222 | 1971 | 1971 | Cry Dr. Chicago                              | Cry Dr. Chicago                           | Manupelli, George               | George Manupelli    | tt0203426 |
| 1746256658 | 1976 | 1975 | Train Ride to Hollywood                      | Train Ride to Hollywood                   | Rondeau, Charles R.             | Charles R. Rondeau  | tt0078412 |
| 1746251207 | 1979 | 1979 | The Prize Fighter                            | The Prize Fighter                         | Preece, Michael                 | Michael Preece      | tt0079754 |
| 1746408655 | 1986 | 1986 | Miss Mary                                    | Miss Mary                                 | Bemberg, Maria Luisa            | María Luisa Bemberg | tt0091528 |
| 1745309601 | 2007 | 2006 | Cocaine Angel                                | Cocaine Angel                             | Tully, Michael                  | Michael Tully       | tt0762083 |
| 1746235405 | 1971 | 1971 | Chrome and Hot Leather                       | Chrome and Hot Leather                    | Frost, Lee                      | Lee Frost           | tt0066915 |
| 1745374961 | 2009 | 2008 | A Beautiful Life                             | A Beautiful Life                          | Chomski, Alejandro              | Alejandro Chomski   | tt1043787 |
| 1746422156 | 1996 | 1996 | Surviving Picasso                            | Surviving Picasso                         | Ivory, James                    | James Ivory         | tt0117791 |
| 1745359706 | 2009 | 2008 | The Loss of a Teardrop Diamond               | The Loss of a Teardrop Diamond            | Markell, Jodie                  | Jodie Markell       | tt0896031 |
| 1745359050 | 2003 | 2003 | Long Gone                                    | Long Gone                                 | Eberhardt, David ; Cahill, Jack | Jack Cahill         | tt0364484 |
| 1745396004 | 2010 | 2010 | BearCity                                     | BearCity                                  | Langway, Douglas                | Douglas Langway     | tt1426320 |
| 1745393717 | 2008 | 2008 | Harvard Beats Yale 29-29                     | Harvard Beats Yale 29 29                  | Rafferty, Kevin                 | Kevin Rafferty      | tt1286800 |
| 1746210572 | 1971 | 1971 | The Female Bunch                             | The Female Bunch                          | Adamson, Al                     | Al Adamson          | tt0064321 |
| 1746394194 | 1984 | 1984 | Thief of Hearts                              | Thief of Hearts                           | Stewart, Douglas Day            | Douglas Day Stewart | tt0088256 |
| 1746438172 | 1996 | 1996 | The Bloody Child                             | The Bloody Child                          | Menkes, Nina                    | Nina Menkes         | tt0115715 |
| 1746410728 | 1994 | 1994 | The Dragon Gate                              | The Dragon Gate                           | Oliver, Michael                 | Mike Marvin         | tt0183008 |
| 1746235601 | 1973 | 1973 | The Train Robbers                            | The Train Robbers                         | Kennedy, Burt                   | Burt Kennedy        | tt0070825 |
| 1746455830 | 1997 | 1996 | Follow Me Home                               | Follow Me Home                            | Bratt, Peter                    | Peter Bratt         | tt0119138 |
| 1745342056 | 2001 | 2001 | Maniacts                                     | Maniacts                                  | Cressler, C. W.                 | C.W. Cressler       | tt0285698 |
| 1746421705 | 1999 | 1999 | A Stranger in the Kingdom                    | A Stranger in the Kingdom                 | Craven, Jay                     | Jay Craven          | tt0126680 |
| 1746202409 | 1970 | 1970 | The Lawyer                                   | The Lawyer                                | Furie, Sidney J.                | Sidney J. Furie     | tt0065970 |

|            |      |      |                                          |                                          |                                       |                     |           |
|------------|------|------|------------------------------------------|------------------------------------------|---------------------------------------|---------------------|-----------|
| 1746235210 | 1972 | 1972 | Rivals                                   | Rivals                                   | Shah, Krishna                         | Krishna Shah        | tt0069185 |
| 1746218784 | 1973 | 1973 | Slither                                  | Slither                                  | Zieff, Howard                         | Howard Zieff        | tt0069282 |
| 1746218846 | 1971 | 1971 | 300 Year Weekend                         | The 300 Year Weekend                     | Stoloff, Victor                       | Victor Stoloff      | tt0066734 |
| 1746420396 | 1983 | 1983 | Metalstorm: The Destruction of Jared-Syn | Metalstorm: The Destruction of Jared Syn | Band, Charles                         | Charles Band        | tt0085935 |
| 1746455878 | 1997 | 1997 | The Myth of Fingerprints                 | The Myth of Fingerprints                 | Freundlich, Bart                      | Bart Freundlich     | tt0119746 |
| 1746419193 | 1990 | 1990 | Ski Patrol                               | Ski Patrol                               | Correll, Richard                      | Rich Correll        | tt0100631 |
| 1746393115 | 1987 | 1987 | Hello Again                              | Hello Again                              | Perry, Frank                          | Frank Perry         | tt0093175 |
| 1746394172 | 1982 | 1982 | Hanky Panky                              | Hanky Panky                              | Poitier, Sidney                       | Sidney Poitier      | tt0084049 |
| 1745303029 | 2007 | 2007 | Georgia Rule                             | Georgia Rule                             | Marshall, Garry                       | Garry Marshall      | tt0791304 |
| 1769973176 | 1970 | 1970 | Mrs. Stone's Thing                       | Mrs. Stone's Thing                       | Robertson, Joseph F.                  | Joseph F. Robertson | tt0208438 |
| 1746210672 | 1972 | 1972 | Richard                                  | Richard                                  | Yerby, Lorees; Hurwitz, Harry         | Harry Hurwitz       | tt0069180 |
| 1745393682 | 2010 | 2009 | It Came from Kuchar                      | It Came from Kuchar                      | Kroot, Jennifer M.                    | Jennifer M. Kroot   | tt1303745 |
| 1746421733 | 1993 | 1992 | I'll Love You Forever... Tonight         | I'll Love You Forever... Tonight         | Bravo, Edgar Michael ; Bravo, Edgar M | Edgar Michael Bravo | tt0104471 |
| 1746219626 | 1972 | 1972 | Eagle in a Cage                          | Eagle in a Cage                          | Cook, Fielder                         | Fielder Cook        | tt0067038 |
| 1746235378 | 1975 | 1975 | Fighting for Our Lives                   | Fighting for Our Lives                   | Pearcy, Glen                          | Glen Pearcy         | tt0072982 |
| 1745309195 | 2006 | 2006 | Pulse                                    | Pulse                                    | Sonzero, Jim                          | Hiroshi Katagiri    | tt1347082 |
| 1745340249 | 2002 | 2001 | Little Secrets                           | Little Secrets                           | Treu, Blair                           | Blair Treu          | tt0296845 |
| 1746419784 | 1993 | 1993 | The Temp                                 | The Temp                                 | Holland, Tom                          | Tom Holland         | tt0108311 |
| 1746235089 | 1973 | 1973 | The Thief Who Came to Dinner             | The Thief Who Came to Dinner             | Yorkin, Bud                           | Bud Yorkin          | tt0070794 |
| 1745358506 | 2008 | 2008 | The Haunting of Molly Hartley            | The Haunting of Molly Hartley            | Liddell, Mickey                       | Mickey Liddell      | tt1045655 |
| 1746455119 | 1995 | 1994 | Roy Cohn/Jack Smith                      | Roy Cohn/Jack Smith                      | Godmilow, Jill                        | Jill Godmilow       | tt0111025 |
| 1746408912 | 1989 | 1989 | Eddie and the Cruisers II: Eddie Lives!  | Eddie and the Cruisers II: Eddie Lives!  | Lord, Jean-Claude                     | Jean                | tt0097262 |
| 1745374355 | 2003 | 2003 | Johnny English                           | Johnny English                           | Howitt, Peter                         | Peter Howitt        | tt0274166 |
| 1746394667 | 1985 | 1985 | Plenty                                   | Plenty                                   | Schepisi, Fred                        | Fred Schepisi       | tt0089816 |
| 1745315552 | 2011 | 2010 | Janie Jones                              | Janie Jones                              | Rosenthal, David M.                   | David M. Rosenthal  | tt1509130 |
| 1746419957 | 1988 | 1987 | Distant Harmony                          | Distant Harmony                          | Sage, DeWitt                          | DeWitt Sage         | tt0092899 |
| 1745372908 | 2002 | 2002 | Strange Fruit                            | Strange Fruit                            | Katz, Joel                            | Joel Katz           | tt0350166 |
| 1746256608 | 1977 | 1977 | The White Buffalo                        | The White Buffalo                        | Thompson, J. Lee                      | J. Lee Thompson     | tt0076915 |
| 1746438689 | 1997 | 1996 | The Daytrippers                          | The Daytrippers                          | Mottola, Greg                         | Greg Mottola        | tt0116041 |
| 1746235434 | 1974 | 1974 | The Dove                                 | The Dove                                 | Jarrott, Charles                      | Charles Jarrott     | tt0071438 |
| 1746455113 | 1998 | 1998 | Wrongfully Accused                       | Wrongfully Accused                       | Proft, Pat                            | Pat Proft           | tt0120901 |
| 1746235263 | 1978 | 1978 | Girlfriends                              | Girlfriends                              | Weill, Claudia                        | Claudia Weill       | tt0077613 |
| 1746454124 | 1997 | 1997 | Prefontaine                              | Prefontaine                              | James, Steve                          | Steve James         | tt0119937 |
| 1746408900 | 1987 | 1987 | Dear America: Letters Home From Vietnam  | Dear America: Letters Home from Vietnam  | Couturie, Bill                        | Bill Couturié       | tt0092851 |
| 1746235428 | 1980 | 1980 | The Mountain Men                         | The Mountain Men                         | Lang, Richard                         | Richard Lang        | tt0081187 |
| 1745358086 | 2008 | 2007 | Very Young Girls                         | Very Young Girls                         | Schisgall, David                      | David Schisgall     | tt1097268 |
| 1745342746 | 2002 | 2002 | In Your Face                             | In Your Face                             | Tommasino, Tim                        | Tim Tommasino       | tt0327940 |
| 1746210658 | 1970 | 1970 | Getting Straight                         | Getting Straight                         | Rush, Richard                         | Richard Rush        | tt0065775 |
| 1745341759 | 2008 | 2007 | Holding Trevor                           | Holding Trevor                           | Goodman, Rosser                       | Rosser Goodman      | tt0960770 |
| 1745357694 | 2010 | 2009 | Finding Bliss                            | Finding Bliss                            | Davis, Julie                          | Julie Davis         | tt1185242 |
| 1745374913 | 2010 | 2009 | The Good Guy                             | The Good Guys                            | DePietro, Julio                       | Bryan Boykins       | tt1433005 |
| 1745332375 | 2011 | 2010 | The 5th Quarter                          | The 5th Quarter                          | Bieber, Rick                          | Rick Bieber         | tt1130964 |
| 1746408501 | 1992 | 1991 | Jumpin' at the Boneyard                  | Jumpin' at the Boneyard                  | Stanzer, Jeff                         | Jeff Stanzer        | tt0102174 |
| 1746234829 | 1972 | 1972 | Up the Sandbox                           | Up the Sandbox                           | Kershner, Irvin                       | Irvin Kershner      | tt0069449 |
| 1746257187 | 1976 | 1976 | The Ritz                                 | The Ritz                                 | Lester, Richard                       | Richard Lester      | tt0075144 |
| 1745293900 | 2007 | 2007 | Dedication                               | Dedication                               | Theroux, Justin                       | Justin Theroux      | tt0490579 |
| 1746210747 | 1970 | 1970 | Hell's Bloody Devils                     | Hell's Bloody Devils                     | Adamson, Al                           | Al Adamson          | tt0065826 |
| 1746410744 | 1986 | 1986 | Thunder Run                              | Thunder Run                              | Hudson, Gary                          | Gary Hudson         | tt0090169 |
| 1745340482 | 2001 | 2001 | Extreme Force                            | Extreme Force                            | Qissi, Michel                         | Michel Qissi        | tt0264605 |
| 1746433570 | 1989 | 1988 | For Queen & Country                      | For Queen & Country                      | Stellman, Martin                      | Martin Stellman     | tt0097373 |
| 1746422137 | 1995 | 1995 | The Crude Oasis                          | The Crude Oasis                          | Graves, Alex                          | Alex Graves         | tt0112746 |
| 1746219542 | 1972 | 1971 | Rain for a Dusty Summer                  | Rain for a Dusty Summer                  | Lubin, Arthur                         | Arthur Lubin        | tt0265612 |
| 1746235685 | 1973 | 1973 | O Lucky Man!                             | O Lucky Man!                             | Anderson, Lindsay                     | Lindsay Anderson    | tt0070464 |
| 1745309167 | 2006 | 2006 | George Bush Goes to Heaven               | George Bush Goes to Heaven               | Liebert, Jonathan                     | Jonathan Liebert    | tt0818490 |
| 1746257806 | 1975 | 1975 | Hester Street                            | Hester Street                            | Micklin Silver, Joan                  | Joan Micklin Silver | tt0073107 |
| 1746423001 | 1994 | 1994 | Freedom on My Mind                       | Freedom on My Mind                       | Field, Connie; Mulford, Marilyn       | Connie Field        | tt0109839 |
| 1746211018 | 1972 | 1971 | The Player                               | The Player                               | De Martini, Thomas                    | Thomas DeMartini    | tt2202599 |

|            |      |      |                                         |                                         |                                      |                       |           |
|------------|------|------|-----------------------------------------|-----------------------------------------|--------------------------------------|-----------------------|-----------|
| 174645451  | 1995 | 1995 | Delta of Venus                          | Delta of Venus                          | King, Zalman                         | Zalman King           | tt0109593 |
| 1745302865 | 2007 | 2007 | Punk's Not Dead                         | Punk's Not Dead                         | Dynner, Susan                        | Susan Dynner          | tt0350002 |
| 1746210114 | 1971 | 1971 | Doc                                     | 'Doc'                                   | Perry, Frank                         | Frank Perry           | tt0067003 |
| 1745395342 | 2010 | 2009 | Great Directors                         | Great Directors                         | Ismailos, Angela                     | Angela Ismailos       | tt1445683 |
| 1745374515 | 2002 | 2003 | These Men of Conscience                 | These Men of Conscience                 | Francis, Carol Ann                   | Carol Ann Francis     | tt0334497 |
| 1745374947 | 2010 | 2010 | Lottery Ticket                          | Lottery Ticket                          | White, Erik                          | Erik White            | tt0979434 |
| 1746408704 | 1989 | 1989 | Midnight                                | Midnight                                | Vane, Norman Thaddeus                | Norman Thaddeus Vane  | tt0097876 |
| 1746210508 | 1971 | 1971 | Punishment Park                         | Punishment Park                         | Watkins, Peter                       | Peter Watkins         | tt0067633 |
| 1746433778 | 1996 | 1996 | The Big Squeeze                         | The Big Squeeze                         | De Leon, Marcus                      | Marcus DeLeon         | tt0115680 |
| 1745395620 | 2009 | 2008 | The Other Man                           | The Other Man                           | Eyre, Richard                        | Richard Eyre          | tt0974613 |
| 1745293384 | 2005 | 2005 | Aeon Flux                               | Æon Flux                                | Kusama, Karyn                        | Karyn Kusama          | tt0402022 |
| 1746219586 | 1973 | 1973 | Blade                                   | Blade                                   | Pintoff, Ernest                      | Ernest Pintoff        | tt0069797 |
| 1746272865 | 1979 | 1979 | Cocaine Cowboys                         | Cocaine Cowboys                         | Lommel, Ulli                         | Ulli Lommel           | tt0078980 |
| 1746422915 | 1992 | 1992 | I Don't Buy Kisses Anymore              | I Don't Buy Kisses Anymore              | Marcarelli, Robert                   | Robert Marcarelli     | tt0104469 |
| 1746219711 | 1976 | 1976 | Shoot                                   | Shoot                                   | Hart, Harvey                         | Harvey Hart           | tt0075212 |
| 1745374948 | 2010 | 2009 | Oceans                                  | Océans                                  | Perrin, Jacques; Cluzaud, Jacques    | Jacques Perrin        | tt0765128 |
| 1746393038 | 1984 | 1984 | Mrs. Soffel                             | Mrs. Soffel                             | Armstrong, Gillian                   | Gillian Armstrong     | tt0087751 |
| 1746258678 | 1979 | 1979 | Promises in the Dark                    | Promises in the Dark                    | Hellman, Jerome                      | Jerome Hellman        | tt0079757 |
| 1746421329 | 1994 | 1994 | Sioux City                              | Sioux City                              | Phillips, Lou Diamond                | Lou Diamond Phillips  | tt0111199 |
| 1746248827 | 1980 | 1980 | Terror Train                            | Terror Train                            | Spottiswoode, Roger                  | Roger Spottiswoode    | tt0081617 |
| 1769971106 | 1970 | 1970 | Sinthia, The Devil's Doll               | Sinthia: The Devil's Doll               | Christian, Sven                      | Ray Dennis Steckler   | tt0063608 |
| 1745341831 | 2009 | 2009 | Beeswax                                 | Beeswax                                 | Bujalski, Andrew                     | Andrew Bujalski       | tt1339268 |
| 1746393318 | 1987 | 1987 | Forever, Lulu                           | Forever, Lulu                           | Kollek, Amos                         | Amos Kollek           | tt0093042 |
| 1746271429 | 1979 | 1979 | Sunnyside                               | Sunnyside                               | Galfas, Timothy                      | Timothy Galfas        | tt0079968 |
| 1769972666 | 1970 | 1970 | The Commune                             | The Commune                             |                                      | Monroe Beehler        | tt0215648 |
| 1746435843 | 1993 | 1993 | Morning Glory                           | Morning Glory                           | Stern, Steven Hilliard               | Steven Hilliard Stern | tt0107604 |
| 1746454555 | 1997 | 1997 | Keys to Tulsa                           | Keys to Tulsa                           | Greif, Leslie                        | Leslie Greif          | tt0116762 |
| 1745359813 | 2002 | 2002 | The 4th Tenor                           | The 4th Tenor                           | Basil, Harry                         | Harry Basil           | tt0275170 |
| 1746454197 | 1994 | 1994 | Dead Beat                               | Dead Beat                               | Dubov, Adam                          | Adam Dubov            | tt0109563 |
| 1745293152 | 2005 | 2004 | Keane                                   | Keane                                   | Kerrigan, Lodge                      | Lodge Kerrigan        | tt0420291 |
| 1745395990 | 2009 | 2009 | Bob Funk                                | Bob Funk                                | Carlisle, Craig                      | Craig Carlisle        | tt1091172 |
| 1745302357 | 2005 | 2004 | Villisca: Living with a Mystery         | Villisca: Living with a Mystery         | Rundle, Kelly                        | Kelly Rundle          | tt0428019 |
| 1746234821 | 1976 | 1976 | Dixie Dynamite                          | Dixie Dynamite                          | Frost, Lee                           | Lee Frost             | tt0074415 |
| 1745293617 | 2007 | 2007 | Premonition                             | Premonition                             | Yapo, Mennan                         | Roman Gabriel         | tt1035485 |
| 1746435929 | 1997 | 1996 | I Love You, I Love You Not              | I Love You, I Love You Not              | Hopkins, Billy                       | Billy Hopkins         | tt0116592 |
| 1746423305 | 1999 | 1998 | Men Cry Bullets                         | Men Cry Bullets                         | Hernandez, Tamara                    | Tamara Hernandez      | tt0148462 |
| 1746437111 | 1997 | 1996 | Paul Monette: The Brink of Summer's End | Paul Monette: The Brink of Summer's End | Bramer, Monte                        | Monte Bramer          | tt0117310 |
| 1746439743 | 1998 | 1998 | Everest                                 | Everest                                 | Breashears, David; MacGillivray, Gre | David Breashears      | tt0120661 |
| 1746409034 | 1992 | 1992 | Out on a Limb                           | Out on a Limb                           | Veber, Francis                       | Francis Veber         | tt0105078 |
| 1746248792 | 1975 | 1975 | W. W. and the Dixie Dancekings          | W.W. and the Dixie Dancekings           | Avildsen, John G.                    | John G. Avildsen      | tt0073878 |
| 1746455139 | 1995 | 1995 | Bad Company                             | Bad Company                             | Harris, Damian                       | Damian Harris         | tt0112443 |
| 1746202254 | 1970 | 1970 | Flap                                    | Flap                                    | Reed, Carol                          | Carol Reed            | tt0065726 |
| 1745340102 | 2002 | 2002 | Feardotcom                              | Feardotcom                              | Malone, William                      | William Malone        | tt0295254 |
| 1746210752 | 1972 | 1972 | Hail                                    | Hail                                    | Levinson, Fred                       | Fred Levinson         | tt0067174 |
| 1746393123 | 1984 | 1983 | Last Night at the Alamo                 | Last Night at the Alamo                 | Pennell, Eagle                       | Eagle Pennell         | tt0085821 |
| 1745340129 | 2004 | 2004 | The Dust Factory                        | The Dust Factory                        | Small, Eric                          | Eric Small            | tt0329030 |
| 1746256784 | 1976 | 1976 | The Astrologer                          | The Astrologer                          | Denney, Craig                        | Craig Denney          | tt2419808 |
| 1746211501 | 1972 | 1972 | Black Gunn                              | Black Gunn                              | Hartford-Davis, Robert               | Robert Hartford       | tt0068281 |
| 1746454107 | 2000 | 2000 | Groove                                  | Groove                                  | Harrison, Greg                       | Greg Harrison         | tt0212974 |
| 1746235102 | 1972 | 1972 | Journey Through Rosebud                 | Journey Through Rosebud                 | Gries, Tom                           | Tom Gries             | tt0068775 |
| 1746562127 | 1954 | 1954 | The Sleeping Tiger                      | The Sleeping Tiger                      | Hanbury, Victor; Losey, Joseph       | Joseph Losey          | tt0047505 |
| 1746409476 | 1986 | 1986 | Ratboy                                  | Ratboy                                  | Locke, Sondra                        | Sondra Locke          | tt0091827 |
| 1746394755 | 1993 | 1992 | Black to the Promised Land              | Black to the Promised Land              | Ali, Madeleine                       | Madeleine Ali         | tt0103824 |
| 1745359961 | 2010 | 2010 | Mine                                    | Mine                                    | Pezanoski, GERALYN                   | Megan J. Wilson       | tt5545022 |
| 1746235289 | 1973 | 1973 | Some Call It Loving                     | Some Call It Loving                     | Harris, James B.                     | James B. Harris       | tt0070714 |
| 1746583551 | 1950 | 1950 | Julius Caesar                           | Julius Caesar                           | Bradley, David                       | David Bradley         | tt0042622 |
| 1746409488 | 1990 | 1990 | A Cry in the Wild                       | A Cry in the Wild                       | Griffiths, Mark                      | Mark Griffiths        | tt0099327 |



|            |      |      |                                                     |                                                     |                          |                        |           |
|------------|------|------|-----------------------------------------------------|-----------------------------------------------------|--------------------------|------------------------|-----------|
| 1746410158 | 1989 | 1989 | An Unremarkable Life                                | An Unremarkable Life                                | Chaudhri, Amin Q.        | Amin Q. Chaudhri       | tt0098565 |
| 1745293379 | 2005 | 2005 | Chain                                               | The Chain                                           | Cohen, Jem               | Craig Knitt            | tt1437261 |
| 1745359035 | 2001 | 2001 | Freaks, Glam Gods and Rock Stars                    | Freaks, Glam Gods and Rock Stars                    | Ryan, John T.            | Tim Ryan               | tt0283348 |
| 1746235782 | 1973 | 1973 | Liquid Space                                        | Liquid Space                                        | Davis, Dale              | Dale Davis             | tt4435160 |
| 1745340162 | 2002 | 2002 | Crop Circles: Quest for Truth                       | Crop Circles: Quest for Truth                       | Gazecki, William         | William Gazecki        | tt0331225 |
| 1746409056 | 1987 | 1987 | Walker                                              | Walker                                              | Cox, Alex                | Alex Cox               | tt0096409 |
| 1745342006 | 2008 | 2007 | Let Them Chirp Awhile                               | Let Them Chirp Awhile                               | Blitstein, Jonathan      | Jonathan Blitstein     | tt0857285 |
| 1746210299 | 1971 | 1971 | Drive, He Said                                      | Drive, He Said                                      | Nicholson, Jack          | Jack Nicholson         | tt0068509 |
| 1745374559 | 2011 | 2010 | The First Grader                                    | The First Grader                                    | Chadwick, Justin         | Justin Chadwick        | tt0790663 |
| 1745282545 | 2006 | 2006 | Deliver Us from Evil                                | Deliver Us from Evil                                | Berg, Amy                | Amy Berg               | tt0814075 |
| 1746434316 | 1990 | 1990 | Men in Love                                         | Men in Love                                         | Huestis, Marc            | Marc Huestis           | tt0097863 |
| 1745359974 | 2003 | 2003 | Step Into Liquid                                    | Step Into Liquid                                    | Brown, Dana              | Dana Brown             | tt0308508 |
| 1745309293 | 2005 | 2005 | The Aggressives                                     | The Aggressives                                     | Peddle, Daniel           | Daniel Peddle          | tt0462757 |
| 1746410364 | 1984 | 1984 | Protocol                                            | Protocol                                            | Ross, Herbert            | Herbert Ross           | tt0087951 |
| 1745359321 | 2011 | 2010 | Ceremony                                            | Ceremony                                            | Winkler, Max             | Max Winkler            | tt1341341 |
| 1746409093 | 1989 | 1989 | Her Alibi                                           | Her Alibi                                           | Beresford, Bruce         | Bruce Beresford        | tt0097500 |
| 1746211496 | 1972 | 1971 | The Secretary                                       | The Secretary                                       | Diehl, William           | William Diehl          | tt0257122 |
| 1746409945 | 1981 | 1981 | Fear No Evil                                        | Fear No Evil                                        | LaLoggia, Frank          | Frank LaLoggia         | tt0082367 |
| 1746235615 | 1978 | 1978 | The Sea Gypsies                                     | The Sea Gypsies                                     | Raffill, Stewart         | Stewart Raffill        | tt0078215 |
| 1745341506 | 2010 | 2010 | The Kids Are All Right                              | The Kids Are All Right                              | Cholodenko, Lisa         | Lisa Cholodenko        | tt0842926 |
| 1769974204 | 1970 | 1970 | Daughter of Satan                                   | Daughter of Satan                                   |                          | Hardi Burton           | tt0382630 |
| 1746235261 | 1974 | 1974 | Seizure                                             | Seizure                                             | Stone, Oliver            | Oliver Stone           | tt0072136 |
| 1746394165 | 1992 | 1991 | A Brief History of Time                             | A Brief History of Time                             | Morris, Errol            | Errol Morris           | tt0103882 |
| 1745339902 | 2003 | 2002 | In America                                          | In America                                          | Sheridan, Jim            | Jim Sheridan           | tt0298845 |
| 1746394677 | 1984 | 1984 | Joy of Sex                                          | Joy of Sex                                          | Coolidge, Martha         | Martha Coolidge        | tt0087513 |
| 1746219680 | 1974 | 1974 | A Knife for the Ladies                              | A Knife for the Ladies                              | Spangler, Larry G.       | Larry G. Spangler      | tt0071722 |
| 1746209723 | 1970 | 1970 | Suppose They Gave a War and Nobody Came             | Suppose They Gave a War and Nobody Came             | Averback, Hy             | Hy Averback            | tt0066422 |
| 1746410359 | 1990 | 1990 | Forever Activists: Stories from the Veterans of the | Forever Activists: Stories from the Veterans of the | Montell, Judith          | Connie Field           | tt0099598 |
| 1746249966 | 1980 | 1980 | Loving Couples                                      | Loving Couples                                      | Smight, Jack             | Jack Smight            | tt0081080 |
| 1746219756 | 1980 | 1980 | The Last Flight of Noah's Ark                       | The Last Flight of Noah's Ark                       | Jarrott, Charles         | Charles Jarrott        | tt0081031 |
| 1746454334 | 1995 | 1995 | Candyman: Farewell to the Flesh                     | Candyman: Farewell to the Flesh                     | Condon, Bill             | Bill Condon            | tt0112625 |
| 1746422590 | 1999 | 1999 | My Life So Far                                      | My Life So Far                                      | Hudson, Hugh             | Hugh Hudson            | tt0120899 |
| 1746419611 | 1990 | 1990 | Quigley Down Under                                  | Quigley Down Under                                  | Wincer, Simon            | Simon Wincer           | tt0102744 |
| 1746409814 | 1989 | 1989 | Licence to Kill                                     | Licence to Kill                                     | Glen, John               | John Glen              | tt0097742 |
| 1746410843 | 1987 | 1987 | They Still Call Me Bruce                            | They Still Call Me Bruce                            | Yune, Johnny; Orr, James | James Orr              | tt0094131 |
| 1745271806 | 2000 | 1999 | American Virgin                                     | American Virgin                                     | Marois, Jean-Pierre      | Jean                   | tt0143422 |
| 1745309263 | 2007 | 2007 | Sleuth                                              | Sleuth                                              | Branagh, Kenneth         | Kenneth Branagh        | tt0857265 |
| 1745374762 | 2010 | 2010 | Raven                                               | The Raven                                           | Martin, Gregori J.       | Ricardo de Montreuil   | tt1646231 |
| 1745309420 | 2007 | 2007 | Zoo                                                 | Zoo                                                 | Devor, Robinson          | Robinson Devor         | tt0874423 |
| 1745358077 | 2010 | 2010 | Harry Potter and the Deathly Hallows: Part I        | Harry Potter and the Deathly Hallows: Part I        | Yates, David             | David Yates            | tt0926084 |
| 1746235016 | 1972 | 1972 | The Groundstar Conspiracy                           | The Groundstar Conspiracy                           | Johnson, Lamont          | Lamont Johnson         | tt0068663 |
| 1746219559 | 1976 | 1976 | The Great Scout and Cathouse Thursday               | The Great Scout & Cathouse Thursday                 | Taylor, Don              | Don Taylor             | tt0074588 |
| 1745359836 | 2001 | 2001 | Downward Angel                                      | Downward Angel                                      | Lewis, Kevin             | Kevin Lewis            | tt0215727 |
| 1746219164 | 1977 | 1977 | Damnation Alley                                     | Damnation Alley                                     | Smight, Jack             | Jack Smight            | tt0075909 |
| 1746394199 | 1992 | 1991 | Thank You and Goodnight                             | Thank You and Good Night                            | Oxenberg, Jan            | Jan Oxenberg           | tt0103070 |
| 1746235476 | 1973 | 1973 | Wonder Women                                        | Wonder Women                                        | O'Neil, Robert           | Robert Vincent O'Neill | tt0070926 |
| 1746438720 | 1998 | 1998 | Cousin Bette                                        | Cousin Bette                                        | McAnuff, Des             | Des McAnuff            | tt0118894 |
| 1746219220 | 1971 | 1971 | Raga                                                | Raga                                                | Worth, Howard            | Howard Worth           | tt0067648 |
| 1746234824 | 1974 | 1974 | Busting                                             | Busting                                             | Hyams, Peter             | Peter Hyams            | tt0071259 |
| 1745309655 | 2006 | 2006 | Frankensteins Bloody Nightmare                      | Frankenstein's Bloody Nightmare                     | Hand, John R.            | John R. Hand           | tt0871513 |
| 1745340103 | 2003 | 2003 | Wash Dry & Spin Out                                 | Wash Dry and Spin Out                               | Patton, Dan              | Dan Patton             | tt0302018 |
| 1746218985 | 1976 | 1976 | Bobbie Jo and the Outlaw                            | Bobbie Jo and the Outlaw                            | Lester, Mark L.          | Mark L. Lester         | tt0074228 |
| 1746258893 | 1977 | 1976 | A Whale of a Tale                                   | A Whale of a Tale                                   | Brown, Ewing Miles       | Ewing Miles Brown      | tt0075421 |
| 1745309225 | 2006 | 2006 | Been Rich All My Life                               | Been Rich All My Life                               | MacDonald, Heather Lyn   | Heather MacDonald      | tt0810768 |
| 1746210505 | 1971 | 1971 | Cold Turkey                                         | Cold Turkey                                         | Lear, Norman             | Norman Lear            | tt0066927 |
| 1745372695 | 2008 | 2008 | The Duchess                                         | The Duchess                                         | Dibb, Saul               | Saul Dibb              | tt0864761 |
| 1746573778 | 1959 | 1960 | Tempest                                             | The Tempest                                         | Lattuada, Alberto        | George Schaefer        | tt0057564 |

|            |      |      |                                                    |                                                  |                                       |                        |           |
|------------|------|------|----------------------------------------------------|--------------------------------------------------|---------------------------------------|------------------------|-----------|
| 1745396027 | 2009 | 2009 | The War on Kids                                    | The War on Kids                                  | Soling, Cevin                         | Cevin Soling           | tt1505145 |
| 1745302529 | 2006 | 2005 | London                                             | London                                           | Richards, Hunter                      | Hunter Richards        | tt0449061 |
| 1746422524 | 1991 | 1990 | Julia Has Two Lovers                               | Julia Has Two Lovers                             | Shbib, Bashar                         | Bashar Shbib           | tt0102170 |
| 1746409485 | 1990 | 1990 | Narrow Margin                                      | Narrow Margin                                    | Hyams, Peter                          | Peter Hyams            | tt0100224 |
| 1745342071 | 2010 | 2009 | Clear Blue Tuesday                                 | Clear Blue Tuesday                               | Lucas, Elizabeth                      | Elizabeth Lucas        | tt1111295 |
| 1746423570 | 1998 | 1997 | Love Walked In                                     | Love Walked In                                   | Campanella, Juan J.                   | Juan José Campanella   | tt0118727 |
| 1745309115 | 2007 | 2007 | Mr. Woodcock                                       | Mr. Woodcock                                     | Gillespie, Craig                      | Craig Gillespie        | tt0419984 |
| 1745302827 | 2007 | 2007 | Tooth and Nail                                     | Tooth and Nail                                   | Young, Mark                           | Mark Young             | tt0922642 |
| 1745342515 | 2010 | 2009 | The Hungry Ghosts                                  | The Hungry Ghosts                                | Imperioli, Michael                    | Michael Imperioli      | tt1225902 |
| 1745309386 | 2006 | 2005 | The White Horse Is Dead                            | The White Horse Is Dead                          | Sky, Pete Red                         | Pete Red Sky           | tt0453567 |
| 1746248777 | 1974 | 1974 | Rhinoceros                                         | Rhinoceros                                       | O'Horgan, Tom                         | Tom O'Horgan           | tt0070605 |
| 1746438501 | 1996 | 1996 | Celtic Pride                                       | Celtic Pride                                     | De Cerchio, Tom                       | Tom DeCerchio          | tt0115851 |
| 1746423582 | 1998 | 1998 | Arguing the World                                  | Arguing the World                                | Dorman, Joseph                        | Joseph Dorman          | tt0129758 |
| 1746219209 | 1977 | 1977 | Viva Knievel!                                      | Viva Knievel!                                    | Douglas, Gordon                       | Gordon Douglas         | tt0076890 |
| 1746211481 | 1973 | 1973 | A Delicate Balance                                 | A Delicate Balance                               | Richardson, Tony                      | Tony Richardson        | tt0069958 |
| 1746235364 | 1973 | 1972 | Trick Baby                                         | Trick Baby                                       | Yust, Larry                           | Larry Yust             | tt0070833 |
| 1746219725 | 1974 | 1974 | The Education of Sonny Carson                      | The Education of Sonny Carson                    | Campus, Michael                       | Michael Campus         | tt0071456 |
| 1745372879 | 2004 | 2003 | Hidden in Plain Sight                              | Hidden in Plain Sight                            | Smihula, John H.                      | John Smihula           | tt0384994 |
| 1746211257 | 1974 | 1974 | Harrad Summer                                      | Harrad Summer                                    | Stern, Steven H.                      | Steven Hilliard Stern  | tt0071597 |
| 1746235298 | 1971 | 1971 | The Horsemen                                       | The Horsemen                                     | Frankenheimer, John                   | John Frankenheimer     | tt0067216 |
| 1746235761 | 1979 | 1979 | Baby Snakes                                        | Baby Snakes                                      | Zappa, Frank                          | Frank Zappa            | tt0078820 |
| 1745309266 | 2007 | 2007 | The Last Sin Eater                                 | The Last Sin Eater                               | Landon , Michael                      | Michael Landon Jr.     | tt0810928 |
| 1745309494 | 2005 | 2005 | Steal Me                                           | Steal Me                                         | Painter, Melissa                      | Melissa Painter        | tt0421250 |
| 1746235625 | 1974 | 1974 | Memory of Us                                       | Memory of Us                                     | Dyal, H. Kaye                         | H. Kaye Dyal           | tt0071830 |
| 1745341324 | 2008 | 2008 | Red                                                | Rend                                             | Diesen, Trygve Allister ; McKee, Luck | Brian David Lazarte    | tt1300595 |
| 1746422940 | 1994 | 1994 | Angels in the Outfield                             | Angels in the Outfield                           | Dear, William                         | William Dear           | tt0109127 |
| 1746438044 | 1997 | 1996 | Screwed                                            | Screwed                                          | Crawford, Alexander                   | Alexander Crawford     | tt0117573 |
| 1746219648 | 1974 | 1974 | Win, Place or Steal                                | Win, Place or Steal                              | Bailey, Richard                       | Richard Bailey         | tt0071149 |
| 1745374584 | 2009 | 2009 | Street Fighter: The Legend of Chun-Li              | Street Fighter: The Legend of Chun Li            | Bartkowiak, Andrzej                   | Andrzej Bartkowiak     | tt0891592 |
| 1746408484 | 1987 | 1987 | Malone                                             | Malone                                           | Cokliss, Harley                       | Harley Cokeliss        | tt0093483 |
| 1745359598 | 2011 | 2010 | Two Gates of Sleep                                 | Two Gates of Sleep                               | Griffin, Alistair Banks               | Alistair Banks Griffin | tt1462058 |
| 1746218783 | 1973 | 1973 | The Roommates                                      | The Roommates                                    | Marks, Arthur                         | Arthur Marks           | tt0236693 |
| 1746420217 | 1986 | 1986 | Never Too Young to Die                             | Never Too Young to Die                           | Bettman, Gil                          | Gil Bettman            | tt0091621 |
| 1746248862 | 1974 | 1974 | Dreams and Nightmares                              | Dreams and Nightmares                            | Osheroff, Abe; Klingman, Larry        | Lawrence Klingman      | tt0408709 |
| 1746419929 | 1989 | 1989 | Riding the Edge                                    | Riding the Edge                                  | Fargo, James                          | James Fargo            | tt0100490 |
| 1746249908 | 1975 | 1975 | Sheila Levine Is Dead and Living in New York       | Sheila Levine Is Dead and Living in New York     | Furie, Sidney J.                      | Sidney J. Furie        | tt0073698 |
| 1745282087 | 2011 | 2010 | Senna                                              | Menna                                            | Kapadia, Asif                         | Ashley Zahorian        | tt1808302 |
| 1745359504 | 2003 | 2002 | The Legend of Leigh Bowery                         | The Legend of Leigh Bowery                       | Atlas, Charles                        | Charles Atlas          | tt0354696 |
| 1746436199 | 1996 | 1995 | The Low Life                                       | The Low Life                                     | Hickenlooper, George                  | George Hickenlooper    | tt0110400 |
| 1745302549 | 2005 | 2005 | Little Man                                         | Little Man                                       | Conn, Nicole                          | Nicole Conn            | tt0430303 |
| 1746219247 | 1973 | 1973 | That Man Bolt                                      | That Man Bolt                                    | Levin, Henry; Rich, David Lowell      | Henry Levin            | tt0070787 |
| 1746419771 | 1994 | 1994 | Brother Minister -- The Assassination of Malcolm X | Brother Minister: The Assassination of Malcolm X | Baxter, Jack; Aalmuhammed, Jefri      | Jefri Aalmuhammed      | tt0109339 |
| 1746408690 | 1991 | 1991 | Driving Me Crazy                                   | Driving Me Crazy                                 | Turteltaub, Jon                       | Jon Turteltaub         | tt0104142 |
| 1745373544 | 2010 | 2010 | Jews and Baseball: An American Love Story          | Jews and Baseball: An American Love Story        | Miller, Peter                         | Peter Miller           | tt1583743 |
| 1745282662 | 2005 | 2005 | The Untold Story of Emmett Louis Till              | The Untold Story of Emmett Louis Till            | Beauchamp, Keith A.                   | Keith Beauchamp        | tt0475420 |
| 1745357604 | 2008 | 2007 | Spirit of the Marathon                             | Spirit of the Marathon                           | Dunham, Jon                           | Jon Dunham             | tt0960792 |
| 1746219167 | 1972 | 1972 | The Carey Treatment                                | The Carey Treatment                              | Edwards, Blake                        | Blake Edwards          | tt0068337 |
| 1746410892 | 1994 | 1994 | Imaginary Crimes                                   | Imaginary Crimes                                 | Drazan, Anthony                       | Anthony Drazan         | tt0110115 |
| 1746272868 | 1977 | 1977 | The Late Show                                      | The Late Show                                    | Benton, Robert                        | Robert Benton          | tt0076301 |
| 1769977348 | 1976 | 1976 | A Labor of Love                                    | A Labor of Love                                  | Flaxman, Robert; Goldman, Daniel      | Robert Flaxman         | tt0249672 |
| 1745341446 | 2004 | 2004 | The Merchant of Venice                             | The Merchant of Venice                           | Radford, Michael                      | Michael Radford        | tt0379889 |
| 1746211034 | 1972 | 1972 | Toys Are Not for Children                          | Toys Are Not for Children                        | Brasloff, Stanley H.                  | Stanley H. Brassloff   | tt0153225 |
| 1746393417 | 1988 | 1988 | Split Decisions                                    | Split Decisions                                  | Drury, David                          | David Drury            | tt0096161 |
| 1746410608 | 1988 | 1988 | Slaughterhouse Rock                                | Slaughterhouse Rock                              | Logothetis, Dimitri                   | Dimitri Logothetis     | tt0096117 |
| 1746420351 | 1988 | 1988 | Patty Hearst                                       | Patty Hearst                                     | Schrader, Paul                        | Paul Schrader          | tt0095836 |
| 1746235441 | 1972 | 1972 | Dear Dead Delilah                                  | Dear Dead Delilah                                | Farris, John                          | John Farris            | tt0068456 |
| 1745342698 | 2010 | 2010 | Meskada                                            | Meskada                                          | Sternfeld, Josh                       | Josh Sternfeld         | tt1461249 |

|            |      |      |                                                |                                             |                                    |                     |           |
|------------|------|------|------------------------------------------------|---------------------------------------------|------------------------------------|---------------------|-----------|
| 1745393849 | 2009 | 2009 | Fix                                            | Cix                                         | Ruspoli, Tao                       | Geoffrey McNeil     | tt4709334 |
| 1745342805 | 2010 | 2009 | Paper Man                                      | The Paper Man                               | Mulroney, Kieran; Mulroney, Michel | Zach Finch          | tt1458656 |
| 1746235754 | 1973 | 1973 | Time to Run                                    | Time to Run                                 | Collier, James F.                  | James F. Collier    | tt0070806 |
| 1746393148 | 1984 | 1984 | Preppies                                       | Preppies                                    | Vincent, Chuck                     | Chuck Vincent       | tt0084533 |
| 1745394607 | 2010 | 2010 | Country Strong                                 | Country Strong                              | Feste, Shana                       | Shana Feste         | tt1555064 |
| 1746409258 | 1987 | 1986 | Ghost Fever                                    | Ghost Fever                                 | Smithee, Alan; Madden, Lee         | Lee Madden          | tt0093088 |
| 1745302980 | 2007 | 2007 | Black White + Gray: A Portrait of Sam Wagstaff | Black White + Gray: A Portrait of Sam Wagst | Crump, James                       | James Crump         | tt1003113 |
| 1746422229 | 1999 | 1999 | Gloria                                         | Gloria                                      | Lumet, Sidney                      | Sidney Lumet        | tt0120683 |
| 1746199760 | 1970 | 1970 | The Savage Wild                                | The Savage Wild                             | Eastman, Gordon                    | Gordon Eastman      | tt0066335 |
| 1745342186 | 2003 | 2003 | The Trip                                       | The Trip                                    | Swain, Miles                       | William Bolander    | tt8052172 |
| 1745282800 | 2006 | 2005 | A Cantor's Tale                                | A Cantor's Tale                             | Anjou, Erik Greenberg              | Erik Anjou          | tt0374568 |
| 1746408856 | 1985 | 1985 | Fraternity Vacation                            | Fraternity Vacation                         | Frawley, James                     | James Frawley       | tt0089167 |
| 1746219053 | 1971 | 1971 | The Battle of Love's Return                    | The Battle of Love's Return                 | Kaufman, Lloyd                     | Lloyd Kaufman       | tt0066814 |
| 1746210676 | 1972 | 1972 | A Separate Peace                               | A Separate Peace                            | Peerce, Larry                      | Larry Peerce        | tt0069249 |
| 1746408823 | 1989 | 1988 | Vampire's Kiss                                 | Vampire's Kiss                              | Bierman, Robert                    | Robert Bierman      | tt0098577 |
| 1746421281 | 2000 | 1999 | Coming Soon                                    | Coming Soon                                 | Burson, Colette                    | Colette Burson      | tt0150176 |
| 1746219592 | 1973 | 1973 | Preacherman Meets Widderwoman                  | Preacherman Meets Widderwoman               | Viola, Albert T.                   | Albert T. Viola     | tt1369553 |
| 1746209674 | 1970 | 1970 | Weekend with the Babysitter                    | Weekend with the Babysitter                 | Henderson, Don                     | Don Henderson       | tt0066553 |
| 1746256645 | 1977 | 1977 | Opening Night                                  | Opening Night                               | Cassavetes, John                   | John Cassavetes     | tt0079672 |
| 1746270040 | 1979 | 1979 | Spirit of the Wind                             | Spirit of the Wind                          | Liddle, Ralph                      | Ralph Liddle        | tt0079940 |
| 1746198147 | 1970 | 1970 | The Red, White and Black                       | The Red, White, and Black                   | Cardos, John                       | John 'Bud' Cardos   | tt0069167 |
| 1745359701 | 2009 | 2008 | Mock Up on Mu                                  | Mock Up on Mu                               | Baldwin, Craig                     | Craig Baldwin       | tt1263692 |
| 1746436800 | 1990 | 1989 | The Big Bang                                   | The Big Bang                                | Toback, James                      | James Toback        | tt0096923 |
| 1745293740 | 2007 | 2006 | The Ultimate Gift                              | The Ultimate Gift                           | Sajbel, Michael O.                 | Michael O. Sajbel   | tt0482629 |
| 1746211068 | 1973 | 1973 | The Homecoming                                 | The Homecoming                              | Hall, Peter                        | Peter Hall          | tt0070188 |
| 1746423741 | 2000 | 2000 | Alois Brunner: The Last Nazi                   | Alois Brunner: The Last Nazi                | Koplow, Monika                     | Monika Koplow       | tt0361297 |
| 1746219007 | 1972 | 1972 | The Revengers                                  | The Revengers                               | Mann, Daniel                       | Daniel Mann         | tt0069179 |
| 1745309355 | 2007 | 2007 | Elizabeth: The Golden Age                      | Elizabeth: The Golden Age                   | Kapur, Shekhar                     | Shekhar Kapur       | tt0414055 |
| 1746433713 | 1995 | 1994 | Black Is...Black Ain't                         | Black Is... Black Ain't                     | Riggs, Marlon T.                   | Marlon Riggs        | tt0109285 |
| 1745372500 | 2010 | 2010 | The Practice of the Wild                       | The Practice of the Wild                    | Healey, John J.                    | John J. Healey      | tt1537485 |
| 1746439418 | 1996 | 1997 | All's Fair in Love and War                     | All's Fair in Love & War                    | Khan, Sartaj                       | James Tyler         | tt0115512 |
| 1746248804 | 1978 | 1978 | They Went That-A-Way & That-A-Way              | They Went That A Way & That A Way           | Montagne, Edward J.; McGowan, Stu  | Stuart E. McGowan   | tt0078384 |
| 1746219010 | 1974 | 1974 | Silence                                        | Silence                                     | Korty, John                        | John Korty          | tt0072161 |
| 1746218931 | 1972 | 1972 | Melinda                                        | Melinda                                     | Robertson, Hugh A.                 | Hugh A. Robertson   | tt0068934 |
| 1746455041 | 1996 | 1995 | Frisk                                          | Frisk                                       | Verow, Todd                        | Todd Verow          | tt0113122 |
| 1745372402 | 2009 | 2009 | Streetballers                                  | Streetballers                               | Krentz, Matthew Scott              | Matt Krentz         | tt0847221 |
| 1745372827 | 2009 | 2008 | Adventures of Power                            | Adventures of Power                         | Gold, Ari                          | Ari Gold            | tt0960721 |
| 1745309578 | 2005 | 2005 | The Jacket                                     | The Jacket                                  | Maybury, John                      | John Maybury        | tt0366627 |
| 1746218742 | 1972 | 1972 | Stanley                                        | Stanley                                     | Grefé, William                     | William Grefé       | tt0069308 |
| 1746256600 | 1980 | 1980 | Tom Horn                                       | Tom Horn                                    | Wiard, William                     | William Wiard       | tt0080031 |
| 1745341468 | 2008 | 2008 | Morning Light                                  | Morning Light                               | Monroe, Mark                       | Mark Monroe         | tt1198405 |
| 1746219726 | 1971 | 1971 | Raid on Rommel                                 | Raid on Rommel                              | Hathaway, Henry                    | Henry Hathaway      | tt0067650 |
| 1745342512 | 2002 | 2001 | Hard Luck                                      | Hard Luck                                   | Rubio, Jack                        | Jack Rubio          | tt0218323 |
| 1746218749 | 1973 | 1973 | Santee                                         | Santee                                      | Nelson, Gary                       | Gary Nelson         | tt0070630 |
| 1746409687 | 1983 | 1983 | Superman III                                   | Superman III                                | Lester, Richard                    | Richard Lester      | tt0086393 |
| 1745309295 | 2005 | 2004 | Three of Hearts: A Postmodern Family           | Three of Hearts: A Postmodern Family        | Kaplan, Susan                      | Susan Kaplan        | tt0424496 |
| 1746202284 | 1970 | 1970 | How Do I Love Thee?                            | How Do I Love Thee?                         | Gordon, Michael                    | Michael Gordon      | tt0065859 |
| 1746393538 | 1984 | 1984 | Alphabet City                                  | Alphabet City                               | Poe, Amos                          | Amos Poe            | tt0086877 |
| 1746421569 | 1999 | 1999 | Dreaming of Joseph Lees                        | Dreaming of Joseph Lees                     | Styles, Eric                       | Eric Styles         | tt0144178 |
| 1746394694 | 1991 | 1991 | At the Max                                     | At the Max                                  |                                    | Noel Archambault    | tt0101374 |
| 1746419961 | 1982 | 1982 | Don't Cry, It's Only Thunder                   | Don't Cry, It's Only Thunder                | Werner, Peter                      | Peter Werner        | tt0083843 |
| 1745393829 | 2008 | 2008 | Flow                                           | Low                                         | Salina, Irena                      | Brennan Howard      | tt1205595 |
| 1746409780 | 1989 | 1989 | We're No Angels                                | We're No Angels                             | Jordan, Neil                       | Neil Jordan         | tt0098625 |
| 1746453994 | 1998 | 1998 | Down in the Delta                              | Down in the Delta                           | Angelou, Maya                      | Maya Angelou        | tt0142231 |
| 1745358582 | 2004 | 2003 | Plan Colombia: Cashing-In on the Drug-War      | Plan Colombia: Cashing In on the Drug War   | Ungerman, Gerard ; Brohy, Audrey   | Audrey Brohy        | tt2076299 |
| 1746409790 | 1986 | 1986 | Eye of the Tiger                               | Eye of the Tiger                            | Sarafian, Richard C.               | Richard C. Sarafian | tt0091027 |
| 1746235466 | 1975 | 1976 | Death Is Not the End                           | Death Is Not the End                        | Michaels, Richard                  | Richard Michaels    | tt0195633 |

|            |      |      |                                                |                                                |                       |                       |           |
|------------|------|------|------------------------------------------------|------------------------------------------------|-----------------------|-----------------------|-----------|
| 1746198674 | 1970 | 1970 | The Student Nurses                             | The Student Nurses                             |                       | Stephanie Rothman     | tt0066418 |
| 1746393020 | 1984 | 1984 | The River                                      | The River                                      | Rydell, Mark          | Mark Rydell           | tt0088007 |
| 1745272600 | 2001 | 2001 | Blow Dry                                       | Blow Dry                                       | Breathnach, Paddy     | Paddy Breathnach      | tt0212380 |
| 1746434600 | 1990 | 1990 | The Guardian                                   | The Guardian                                   | Friedkin, William     | William Friedkin      | tt0099710 |
| 1746270384 | 1980 | 1980 | Last Rites                                     | Last Rites                                     | Paris, Domico         | Domico Paris          | tt0081034 |
| 1746409691 | 1983 | 1983 | Baby It's You                                  | Baby It's You                                  | Sayles, John          | John Sayles           | tt0085208 |
| 1745359647 | 2002 | 2002 | The Importance of Being Earnest                | The Importance of Being Earnest                | Parker, Oliver        | Oliver Parker         | tt0278500 |
| 1746235427 | 1974 | 1974 | Where the Red Fern Grows                       | Where the Red Fern Grows                       | Tokar, Norman         | Norman Tokar          | tt0072402 |
| 1746455209 | 1999 | 1998 | Legacy                                         | Legacy                                         | Lending, Tod          | T.J. Scott            | tt0156734 |
| 1746219428 | 1980 | 1980 | Up the Academy                                 | Up the Academy                                 | Downey, Robert        | Robert Downey Sr.     | tt0081695 |
| 1745339951 | 2004 | 2004 | The Big Bounce                                 | The Big Bounce                                 | Armitage, George      | George Armitage       | tt0315824 |
| 1746219660 | 1972 | 1971 | Cactus in the Snow                             | Cactus in the Snow                             | Zweiback, Martin      | A. Martin Zweiback    | tt0065514 |
| 1746420243 | 1994 | 1994 | The Inkwell                                    | The Inkwell                                    | Rich, Matty           | Matty Rich            | tt0110137 |
| 1745302383 | 2006 | 2005 | Don't Come Knocking                            | Don't Come Knocking                            | Wenders, Wim          | Wim Wenders           | tt0377800 |
| 1745302482 | 2006 | 2005 | Leonard Cohen I'm Your Man                     | Leonard Cohen: I'm Your Man                    | Lunson, Lian          | Lian Lunson           | tt0478197 |
| 1746453889 | 1998 | 1998 | Polish Wedding                                 | Polish Wedding                                 | Connolly, Theresa     | Theresa Connolly      | tt0119910 |
| 1746218993 | 1977 | 1976 | High Velocity                                  | High Velocity                                  | Kramer, Remi          | Remi Kramer           | tt0076145 |
| 1769973269 | 1970 | 1970 | Pump Primer                                    | The Pimp Primer                                |                       | Nick Millard          | tt1553387 |
| 1746455844 | 1997 | 1997 | That Old Feeling                               | That Old Feeling                               | Reiner, Carl          | Carl Reiner           | tt0120318 |
| 1746410850 | 1987 | 1987 | China Run                                      | China Run                                      | Grant, Mickey         | Mickey Grant          | tt0355322 |
| 1746420894 | 1981 | 1981 | Honky Tonk Freeway                             | Honky Tonk Freeway                             | Schlesinger, John     | John Schlesinger      | tt0082525 |
| 1746394548 | 1992 | 1992 | Man Trouble                                    | Man Trouble                                    | Rafelson, Bob         | Bob Rafelson          | tt0104804 |
| 1745309585 | 2005 | 2005 | One More Round                                 | One More Round                                 | Sepher, Stephen       | Stephen C. Sepher     | tt0446012 |
| 1745374791 | 2008 | 2008 | Not Your Typical Bigfoot Movie                 | Not Your Typical Bigfoot Movie                 | Delaney, Jay          | Jay Delaney           | tt1185384 |
| 1746439697 | 2000 | 2000 | The Beach                                      | The Beach                                      | Boyle, Danny          | Danny Boyle           | tt0163978 |
| 1746455811 | 1997 | 1996 | Cadillac Ranch                                 | Cadillac Ranch                                 | Gottlieb, Lisa        | Lisa Gottlieb         | tt0115801 |
| 1745342907 | 2010 | 2010 | Lbs.                                           | Heels                                          | Bonifacio, Matthew    | Ricky Reidling        | tt1160371 |
| 1745359761 | 2009 | 2008 | Gospel Hill                                    | Gospel Hill                                    | Esposito, Giancarlo   | Giancarlo Esposito    | tt0810880 |
| 1745374943 | 2008 | 2008 | Deception                                      | Deception                                      | Langenegger, Marcel   | James R. Johnson      | tt1347323 |
| 1745342892 | 2003 | 2003 | Forbidden Photographs: The Life and Work of Cl | Forbidden Photographs: The Life and Work of Cl | MacDonald, Bill       | Bill MacDonald        | tt0396022 |
| 1745394102 | 2010 | 2009 | Spoken Word                                    | Spoken Word                                    | Nunez, Victor         | Victor Nunez          | tt1212443 |
| 1746218787 | 1973 | 1973 | The Daring Dobermans                           | The Daring Dobermans                           | Chudnow, Byron Ross   | Byron Chudnow         | tt0069944 |
| 1746423756 | 1997 | 1997 | Soul Food                                      | Soul Food                                      | Tillman, George       | George Tillman Jr.    | tt0120169 |
| 1746420546 | 1991 | 1991 | True Identity                                  | True Identity                                  | Lane, Charles         | Charles Lane          | tt0103128 |
| 1746421002 | 1994 | 1994 | Improper Conduct                               | Improper Conduct                               | Mundhra, Jag          | Jag Mundhra           | tt0110118 |
| 1745339939 | 2003 | 2003 | Grind                                          | Grind                                          | La Scala, Casey       | Casey La Scala        | tt0338077 |
| 1745342644 | 2001 | 2001 | American Desi                                  | American Desi                                  | Pandya, Piyush Dinker | Piyush Dinker Pandya  | tt0203289 |
| 1746219179 | 1972 | 1971 | JW Coop                                        | J W Coop                                       | Robertson, Cliff      | Cliff Robertson       | tt0067258 |
| 1745302762 | 2007 | 2007 | Feel the Noise                                 | Feel the Noise                                 | Chomski, Alejandro    | Alejandro Chomski     | tt0756703 |
| 1746219156 | 1972 | 1972 | Fillmore                                       | Fillmore                                       | Heffron, Richard T.   | Richard T. Heffron    | tt0068584 |
| 1769974224 | 1970 | 1970 | Come One, Come All!                            | Come One, Come All                             | Gregory, Sebastian    | Tony Vorno            | tt0166538 |
| 1745293662 | 2007 | 2006 | Disappearances                                 | Disappearances                                 | Craven, Jay           | Jay Craven            | tt0465440 |
| 1746419949 | 1987 | 1987 | Emanon                                         | Emanon                                         | Paul, Stuart          | Stuart Paul           | tt0095090 |
| 1746219163 | 1976 | 1976 | Pony Express Rider                             | Pony Express Rider                             | Totten, Robert        | Robert Totten         | tt0075087 |
| 1746250146 | 1976 | 1976 | Leadbelly                                      | Leadbelly                                      | Parks, Gordon         | Gordon Parks          | tt0074781 |
| 1746272228 | 1980 | 1979 | Home Movies                                    | Home Movies                                    | De Palma, Brian       | Brian De Palma        | tt0079302 |
| 1745272138 | 2000 | 1999 | Just One Time                                  | Just One Time                                  | Janger, Lane          | Lane Janger           | tt0168912 |
| 1746410714 | 1993 | 1993 | The Seventh Coin                               | The Seventh Coin                               | Soref, Dror           | Dror Soref            | tt0105361 |
| 1745315407 | 2011 | 2010 | Pete Smalls Is Dead                            | Pete Smalls Is Dead                            | Rockwell, Alexandre   | Alexandre Rockwell    | tt1381413 |
| 1745393674 | 2009 | 2009 | Serious Moonlight                              | Serious Moonlight                              | Hines, Cheryl         | Cheryl Hines          | tt1133993 |
| 1746218712 | 1973 | 1974 | The Man from Clover Grove                      | The Man from Clover Grove                      | Hillman, William B.   | William Byron Hillman | tt0129221 |
| 1746219389 | 1973 | 1973 | Ganja & Hess                                   | Ganja & Hess                                   | Gunn, Bill            | Bill Gunn             | tt0068619 |
| 1746410686 | 1994 | 1994 | Inevitable Grace                               | Inevitable Grace                               | Canawati, Alex        | Alex Monty Canawati   | tt0110136 |
| 1746219621 | 1980 | 1979 | Penitentiary                                   | Penitentiary                                   | Fanaka, Jamaa         | Jamaa Fanaka          | tt0079709 |
| 1746422939 | 1989 | 1989 | Cold Feet                                      | Cold Feet                                      | Dornhelm, Robert      | Robert Dornhelm       | tt0097076 |
| 1746454569 | 1997 | 1996 | Never Met Picasso                              | Never Met Picasso                              | Kijak, Stephen        | Stephen Kijak         | tt0117167 |
| 1746219217 | 1974 | 1974 | The Klansman                                   | Klansman                                       | Young, Terence        | Terence Young         | tt0071721 |

|            |      |      |                                                |                                              |                                       |                          |           |
|------------|------|------|------------------------------------------------|----------------------------------------------|---------------------------------------|--------------------------|-----------|
| 1746269651 | 1976 | 1976 | The Thursday Morning Murders                   | The Thursday Morning Murders                 | Nahay, Michael                        | Michael Nahay            | tt2397424 |
| 1746210512 | 1971 | 1971 | Three Lives                                    | Three Lives                                  | Irvine, Louva; Mide, Robin            | Kate Millett             | tt0067852 |
| 1745341989 | 2008 | 2007 | Hounddog                                       | Hounddog                                     | Kampmeier, Deborah                    | Deborah Kampmeier        | tt0415856 |
| 1746202667 | 1970 | 1970 | Guru the Mad Monk                              | Guru, the Mad Monk                           | Milligan, Andy                        | Andy Milligan            | tt0067169 |
| 1745302823 | 2005 | 2005 | Alone in the Dark                              | Alone in the Dark                            | Boll, Uwe                             | Uwe Boll                 | tt0369226 |
| 1746235230 | 1973 | 1973 | Book of Numbers                                | Book of Numbers                              | St. Jacques, Raymond                  | Raymond St. Jacques      | tt0069816 |
| 1746437545 | 1998 | 1997 | Hurricane Streets                              | Hurricane Streets                            | Freeman, Morgan J.                    | Morgan J. Freeman        | tt0119338 |
| 1746455676 | 1996 | 1996 | Fargo                                          | Fargo                                        | Coen, Joel                            | Joel Coen                | tt0116282 |
| 1745372896 | 2003 | 2002 | City of Ghosts                                 | City of Ghosts                               | Dillon, Matt                          | Matt Dillon              | tt0164003 |
| 1745374115 | 2002 | 2002 | Daddy & Papa                                   | Daddy and Papa                               | Symons, Johnny                        | Johnny Symons            | tt0303324 |
| 1745342623 | 2010 | 2009 | Waiting for Armageddon                         | Waiting for Armageddon                       | Davis, Kate; Sacchi, Franco; Heilbror | Kate Davis               | tt1372746 |
| 1746203228 | 1971 | 1971 | Desperate Characters                           | Desperate Characters                         | Gilroy, Frank D.                      | Frank D. Gilroy          | tt0066986 |
| 1746219579 | 1971 | 1971 | The Love Machine                               | The Love Machine                             | Haley, Jack                           | Jack Haley Jr.           | tt0067359 |
| 1746393452 | 1987 | 1987 | Matewan                                        | Matewan                                      | Sayles, John                          | John Sayles              | tt0093509 |
| 1746433936 | 1999 | 1999 | Mickey Blue Eyes                               | Mickey Blue Eyes                             | Makin, Kelly                          | Kelly Makin              | tt0130121 |
| 1746409492 | 1989 | 1989 | Out Cold                                       | Out Cold                                     | Mowbray, Malcolm                      | Malcolm Mowbray          | tt0098042 |
| 1746421272 | 1997 | 1997 | The House of Yes                               | The House of Yes                             | Waters, Mark                          | Mark Waters              | tt0119324 |
| 1746210750 | 1970 | 1971 | Nurse-Made                                     | Nurse Made                                   |                                       | Robert M. Mansfield      | tt0253358 |
| 1746410756 | 1989 | 1989 | The Luckiest Man in the World                  | The Luckiest Man in the World                | Gilroy, Frank D.                      | Frank D. Gilroy          | tt0097792 |
| 1745293644 | 2006 | 2006 | Deeper Than Y                                  | Deeper Than Y                                | Siller, Ilona; Siller, Lane           | Ilona Siller             | tt0825664 |
| 1745372524 | 2008 | 2008 | Disfigured                                     | Disfigured                                   | Gers, Glenn                           | Glenn Gers               | tt0830535 |
| 1746235484 | 1975 | 1975 | The Best of Walt Disney's True-Life Adventures | The Best of Walt Disney's True Life Adventur | Algar, James                          | James Algar              | tt0072696 |
| 1745374337 | 2010 | 2009 | Drool                                          | Drool                                        | Kissam, Nancy                         | Nancy Kissam             | tt1268962 |
| 1746209411 | 1967 | 1967 | Valley of Mystery                              | Valley of Mystery                            | Leytes, Josef                         | Joseph Leytes            | tt0061148 |
| 1745271736 | 2000 | 2000 | The Visit                                      | The Visit                                    | Walker-Pearlman, Jordan               | Jordan Walker            | tt0199129 |
| 1746219387 | 1971 | 1971 | Year of the Yahoo!                             | The Year of the Yahoo!                       | Lewis, Herschell Gordon               | Herschell Gordon Lewis   | tt0069521 |
| 1746410815 | 1982 | 1982 | Lookin' to Get Out                             | Lookin' to Get Out                           | Ashby, Hal                            | Hal Ashby                | tt0084268 |
| 1745309190 | 2007 | 2007 | Closing Escrow                                 | Closing Escrow                               | Kapreljan, Armen ; Llewellyn, Kent    | Armen Kapreljan          | tt0473015 |
| 1746455860 | 1994 | 1994 | Alma's Rainbow                                 | Alma's Rainbow                               | Chenzira, Ayoka                       | Ayoka Chenzira           | tt0109085 |
| 1745341855 | 2004 | 2004 | NASCAR: The IMAX Experience                    | NASCAR: The IMAX Experience                  | Wincer, Simon                         | Simon Wincer             | tt0353774 |
| 1746218797 | 1972 | 1972 | All About Alice                                | All About Alice                              | Harrison, Ray                         | Ray Harrison             | tt0209905 |
| 1769974232 | 1970 | 1970 | Who Killed Cock Robin?                         | Who Killed Cock Robin?                       | Flynn, Harry                          | Don Jones                | tt0153784 |
| 1746410620 | 1988 | 1987 | My Best Friend Is a Vampire                    | My Best Friend Is a Vampire                  | Huston, Jimmy                         | Jimmy Huston             | tt0095684 |
| 1746453943 | 1997 | 1997 | The Boxer                                      | The Boxer                                    | Sheridan, Jim                         | Jim Sheridan             | tt0118760 |
| 1746218756 | 1975 | 1975 | Barry Lyndon                                   | Barry Lyndon                                 | Kubrick, Stanley                      | Stanley Kubrick          | tt0072684 |
| 1746219558 | 1978 | 1978 | The One and Only                               | The One and Only                             | Reiner, Carl                          | Carl Reiner              | tt0078034 |
| 1746422142 | 1996 | 1996 | Carpati: 50 Miles, 50 Years                    | Carpati: 50 Miles, 50 Years                  | Strom, Yale                           | Yale Strom               | tt0115835 |
| 1746261079 | 1980 | 1980 | First Family                                   | First Family                                 | Henry, Buck                           | Buck Henry               | tt0080739 |
| 1746251237 | 1975 | 1975 | Report to the Commissioner                     | Report to the Commissioner                   | Katselas, Milton                      | Milton Katselas          | tt0073620 |
| 1745341441 | 2003 | 2002 | The Guru                                       | The Guru                                     | Mayer, Daisy von Scherler             | Daisy von Scherler Mayer | tt0280720 |
| 1746210711 | 1972 | 1972 | Thumb Tripping                                 | Thumb Tripping                               | Masters, Quentin                      | Quentin Masters          | tt0069377 |
| 1746410565 | 1990 | 1990 | The Closer                                     | The Closer                                   | Logothetis, Dimitri                   | Dimitri Logothetis       | tt0101596 |
| 1745293580 | 2006 | 2006 | Miss Potter                                    | Miss Potter                                  | Noonan, Chris                         | Chris Noonan             | tt0482546 |
| 1769971191 | 1970 | 1970 | Dinah East                                     | Dinah East                                   | Nash, Gene                            | Gene Nash                | tt0190364 |
| 1745309557 | 2007 | 2007 | Charlie                                        | Charlie                                      | Interlandi, Salvatore                 | Salvatore Interlandi     | tt0490839 |
| 1746423581 | 1989 | 1989 | The Package                                    | The Package                                  | Davis, Andrew                         | Andrew Davis             | tt0098051 |
| 1745395694 | 2008 | 2007 | Ripple Effect                                  | Ripple Effect                                | Caland, Philippe                      | Philippe Caland          | tt0479140 |
| 1746270856 | 1979 | 1979 | Moonraker                                      | Moonraker                                    | Gilbert, Lewis                        | Lewis Gilbert            | tt0079574 |
| 1746423004 | 1995 | 1995 | Gordy                                          | Gordy                                        | Lewis, Mark                           | Mark Lewis               | tt0113199 |
| 1746439437 | 1996 | 1996 | Jane Eyre                                      | Jane Eyre                                    | Zeffirelli, Franco                    | Franco Zeffirelli        | tt0116684 |
| 1746419768 | 1987 | 1987 | The Allnighter                                 | The Allnighter                               | Hoffs, Tamar Simon                    | Tamar Simon Hoffs        | tt0092537 |
| 1746235468 | 1979 | 1979 | The Glove                                      | The Glove                                    | Hagen, Ross                           | Ross Hagen               | tt0077614 |
| 1746422172 | 1994 | 1993 | My Life's in Turnaround                        | My Life's in Turnaround                      | Schaeffer, Eric; Ward, Donal Lardner  | Eric Schaeffer           | tt0107631 |
| 1746410529 | 1981 | 1981 | Chanel Solitaire                               | Chanel Solitaire                             | Kaczender, George                     | George Kaczender         | tt0082156 |
| 1746219353 | 1979 | 1979 | The Promise                                    | The Promise                                  | Cates, Gilbert                        | Gilbert Cates            | tt0079756 |
| 1769973186 | 1970 | 1970 | Don't Just Lay There                           | Don't Just Lay There                         | Pine, Frank                           | Phillip Pine             | tt0191966 |
| 1746455849 | 1996 | 1996 | The Rich Man's Wife                            | The Rich Man's Wife                          | Jones, Amy Holden                     | Amy Holden Jones         | tt0117473 |

|            |      |      |                                                |                                            |                                     |                       |           |
|------------|------|------|------------------------------------------------|--------------------------------------------|-------------------------------------|-----------------------|-----------|
| 1746423339 | 1999 | 1999 | Pitch People                                   | Pitch People                               | Jacobs, Stanley                     | Stanley Jacobs        | tt0241822 |
| 1746235706 | 1973 | 1973 | Interval                                       | Interval                                   | Mann, Daniel                        | Daniel Mann           | tt0070221 |
| 1746235661 | 1975 | 1975 | Eadweard Muybridge, Zoopraxographer            | Eadweard Muybridge, Zoopraxographer        | Andersen, Thom                      | Thom Andersen         | tt0071454 |
| 1746420550 | 1989 | 1989 | Downwind/Downstream                            | Downwind/Downstream                        | McLeod, Christopher                 | Christopher McLeod    | tt0337985 |
| 1746211064 | 1971 | 1971 | Bushman                                        | Bushman                                    | Schickele, David                    | David Schickele       | tt0212016 |
| 1746202927 | 1970 | 1970 | The Love Pirate                                | The Love Pirate                            | Mahon, Barry                        | Barry Mahon           | tt0173993 |
| 1746456131 | 1996 | 1996 | Unforgettable                                  | Unforgettable                              | Dahl, John                          | John Dahl             | tt0118040 |
| 1746248861 | 1973 | 1973 | The Black 6                                    | The Black 6                                | Cimber, Matt                        | Matt Cimber           | tt0071227 |
| 1746434973 | 1997 | 1997 | Anthem                                         | Anthem                                     | Gabel, Shainee; Hahn, Kristin       | Shainee Gabel         | tt0118626 |
| 1746235602 | 1973 | 1972 | Sins of Rachel                                 | Sins of Rachel                             | Fontaine, Richard                   | Dick Fontaine         | tt0258161 |
| 1746219585 | 1975 | 1975 | Posse                                          | Posse                                      | Douglas, Kirk                       | Kirk Douglas          | tt0073559 |
| 1746436828 | 1997 | 1996 | Staccato Purr of the Exhaust                   | Staccato Purr of the Exhaust               | Meza, Luis M.                       | L.M. Meza             | tt0127298 |
| 1746420552 | 1993 | 1993 | Bound & Gagged: A Love Story                   | Bound and Gagged: A Love Story             | Appleby, Daniel                     | Daniel B. Appleby     | tt0103867 |
| 1745293439 | 2007 | 2007 | Forfeit                                        | Forfeit                                    | Shea, Andrew Brendan                | Andrew Shea           | tt0472096 |
| 1746209805 | 1970 | 1970 | The Ballad of Cable Hogue                      | The Ballad of Cable Hogue                  | Peckinpah, Sam                      | Sam Peckinpah         | tt0065446 |
| 1746439081 | 1998 | 1997 | Broadway Damage                                | Broadway Damage                            | Mignatti, Victor                    | Victor Mignatti       | tt0118780 |
| 1746420527 | 1991 | 1991 | Body Parts                                     | Body Parts                                 | Red, Eric                           | Eric Red              | tt0101492 |
| 1745372422 | 2002 | 2002 | The Last Man                                   | The Lost Man                               | Ralston, Harry                      | Brian Ward            | tt7307120 |
| 1746410002 | 1984 | 1984 | The River Rat                                  | The River Rat                              | Rickman, Tom                        | Thomas Rickman        | tt0088006 |
| 1746438558 | 1999 | 1999 | Exiled                                         | Exiled                                     | Muir, Bill                          | Bill Muir             | tt0218188 |
| 1746208465 | 1970 | 1970 | Dreams of Glass                                | Dreams of Glass                            | Clouse, Robert                      | Robert Clouse         | tt0064261 |
| 1745342758 | 2009 | 2008 | At the Edge of the World                       | At the Edge of the World                   | Stone, Dan                          | Dan Stone             | tt1286499 |
| 1746210642 | 1972 | 1972 | George                                         | George!                                    | Bennett, Wallace C.                 | Wallace C. Bennett    | tt0066660 |
| 1745293448 | 2007 | 2007 | Arranged                                       | Arranged                                   | Crespo, Diane ; Schaefer, Stefan C. | Diane Crespo          | tt0848542 |
| 1746219752 | 1974 | 1973 | Horror High                                    | Horror High                                | Stouffer, Larry N.                  | Larry N. Stouffer     | tt0072331 |
| 1745357946 | 2002 | 2002 | Black Picket Fence                             | Black Picket Fence                         | Goes, Sergio                        | Sergio Goes           | tt0315838 |
| 1745282683 | 2007 | 2006 | Puccini for Beginners                          | Puccini for Beginners                      | Maggenti, Maria                     | Maria Maggenti        | tt0492481 |
| 1745302655 | 2006 | 2006 | Black Christmas                                | Black Christmas                            | Morgan, Glen                        | Glen Morgan           | tt0454082 |
| 1746219181 | 1977 | 1977 | One on One                                     | One on One                                 | Johnson, Lamont                     | Lamont Johnson        | tt0076500 |
| 1745359932 | 2008 | 2008 | Wild Combination: A Portrait of Arthur Russell | Wild Combination: A Portrait of Arthur Rus | Wolf, Matt                          | Matt Wolf             | tt1168662 |
| 1745282714 | 2007 | 2007 | Awake                                          | Awaken                                     | Harold, Joby                        | Jacob Kindberg        | tt1413951 |
| 1745341575 | 2004 | 2004 | P.S.                                           | P.S.                                       | Kidd, Dylan                         | Dylan Kidd            | tt0380609 |
| 1746421707 | 1998 | 1997 | Circus Redickulless                            | Circus Redickulless                        | Glau, Phillip                       | Phillip Glau          | tt0150134 |
| 1769973303 | 1970 | 1970 | The Wild Scene                                 | The Wild Scene                             | Rowland, William                    | William Rowland       | tt0066571 |
| 1745294057 | 2006 | 2006 | One Night with the King                        | One Night with the King                    | Sajbel, Michael O.                  | Michael O. Sajbel     | tt0430431 |
| 1745359756 | 2010 | 2009 | White on Rice                                  | White on Rice                              | Boyle, Dave                         | Dave Boyle            | tt0892904 |
| 1746408886 | 1982 | 1982 | Homework                                       | Homework                                   | Beshears, James                     | James Beshears        | tt0084084 |
| 1746235479 | 1971 | 1971 | Death in Venice                                | Death in Venice                            | Visconti, Luchino                   | Luchino Visconti      | tt0067445 |
| 1746420384 | 1987 | 1987 | Stripped to Kill                               | Stripped to Kill                           | Ruben, Katt Shea                    | Katt Shea             | tt0094061 |
| 1745358526 | 2010 | 2010 | Fresh                                          | Flesh                                      | Joanes, Ana Sofia                   | Kristin R. Lauterbach | tt1719691 |
| 1746250220 | 1976 | 1976 | Swashbuckler                                   | Swashbuckler                               | Goldstone, James                    | James Goldstone       | tt0075294 |
| 1746202377 | 1970 | 1970 | Satanis, the Devil's Mass                      | Satanis: The Devil's Mass                  | Laurent, Ray                        | Ray Laurent           | tt0063550 |
| 1745341753 | 2010 | 2010 | Tooth Fairy                                    | Tooth Fairy                                | Lembeck, Michael                    | Susan Ee              | tt1466547 |
| 1746210161 | 1970 | 1970 | Angels Die Hard!                               | Angels Die Hard                            | Compton, Richard                    | Richard Compton       | tt0065405 |
| 1746434655 | 1998 | 1998 | SlamNation                                     | SlamNation                                 | Devlin, Paul                        | Paul Devlin           | tt0152468 |
| 1745332067 | 2011 | 2010 | Amigo                                          | Amigo                                      | Sayles, John                        | John Sayles           | tt1562847 |
| 1745340148 | 2001 | 2001 | Someone Like You                               | Someone Like You...                        | Goldwyn, Tony                       | Tony Goldwyn          | tt0244970 |
| 1746410524 | 1986 | 1986 | The Naked Cage                                 | The Naked Cage                             | Nicholas, Paul                      | Paul Nicholas         | tt0091603 |
| 1745293888 | 2006 | 2005 | Factotum                                       | Factotum                                   | Hamer, Bent                         | Bent Hamer            | tt0417658 |
| 1746393342 | 1988 | 1988 | Hellbound: Hellraiser II                       | Hellbound: Hellraiser II                   | Randel, Tony                        | Tony Randel           | tt0095294 |
| 1746235446 | 1973 | 1973 | The Candy Snatchers                            | The Candy Snatchers                        | Trueblood, Guerdon                  | Guerdon Trueblood     | tt0069840 |
| 1746235465 | 1977 | 1977 | Sinbad and the Eye of the Tiger                | Sinbad and the Eye of the Tiger            | Wanamaker, Sam                      | Sam Wanamaker         | tt0076716 |
| 1746455021 | 1996 | 1996 | Sunset Park                                    | Sunset Park                                | Gomer, Steve                        | Steve Gomer           | tt0117784 |
| 1746409994 | 1984 | 1984 | Comedienne                                     | Comedienne                                 | Matheson, Katherine                 | Katherine Matheson    | tt0402933 |
| 1745293761 | 2006 | 2006 | Hollywood                                      | Hollywood                                  | Rose, Rick                          | Rick Rose             | tt0887141 |
| 1745359823 | 2009 | 2009 | Harry Potter and the Half-Blood Prince         | Harry Potter and the Half Blood Prince     | Yates, David                        | David Yates           | tt0417741 |
| 1746409024 | 1988 | 1988 | Dangerous Love                                 | Dangerous Love                             | Ollstein, Marty                     | Marty Ollstein        | tt0094948 |

|            |      |      |                                                |                                             |                                  |                      |           |
|------------|------|------|------------------------------------------------|---------------------------------------------|----------------------------------|----------------------|-----------|
| 1746219245 | 1973 | 1972 | Pancho Villa                                   | Pancho Villa                                | Martin, Gene                     | Eugenio Martín       | tt0069057 |
| 1746422929 | 1994 | 1994 | With Honors                                    | With Honors                                 | Keshishian, Alek                 | Alek Keshishian      | tt0111732 |
| 1745282824 | 2006 | 2006 | The Painted Veil                               | The Painted Veil                            | Curran, John                     | John Curran          | tt0446755 |
| 1745372548 | 2004 | 2004 | With All Deliberate Speed                      | With All Deliberate Speed                   | Gilbert, Peter                   | Peter Gilbert        | tt0408338 |
| 1746394740 | 1991 | 1991 | The Butcher's Wife                             | The Butcher's Wife                          | Hughes, Terry                    | Terry Hughes         | tt0101523 |
| 1746419128 | 1983 | 1983 | Heartbreaker                                   | Heartbreaker                                | Zuniga, Frank                    | Frank Zuniga         | tt0085659 |
| 1745293495 | 2005 | 2004 | The Other Side of AIDS                         | The Other Side of AIDS                      | Scovill, Robin                   | Robin Scovill        | tt0427614 |
| 1746235785 | 1975 | 1975 | Framed                                         | Framed                                      | Karlson, Phil                    | Phil Karlson         | tt0073015 |
| 1746393775 | 1984 | 1984 | Once Upon a Time in America                    | Once Upon a Time in America                 | Leone, Sergio                    | Sergio Leone         | tt0087843 |
| 1746272864 | 1980 | 1980 | Happy Birthday, Gemini                         | Happy Birthday, Gemini                      | Benner, Richard                  | Richard Benner       | tt0080837 |
| 1746394747 | 1993 | 1992 | American Heart                                 | American Heart                              | Bell, Martin                     | Martin Bell          | tt0103670 |
| 1745374912 | 2011 | 2010 | Henry's Crime                                  | Henry's Crime                               | Venville, Malcolm                | Malcolm Venville     | tt1220888 |
| 1746453906 | 2000 | 1999 | Black and White                                | Black and White                             | Toback, James                    | Yuri Zeltser         | tt0149898 |
| 1746421340 | 1996 | 1995 | Sweet Nothing                                  | Sweet Nothing                               | Winick, Gary                     | Gary Winick          | tt0114592 |
| 1746219108 | 1972 | 1972 | Tales from the Crypt                           | Tales from the Crypt                        | Francis, Freddie                 | Freddie Francis      | tt0069341 |
| 1746219682 | 1974 | 1974 | Ride in a Pink Car                             | Ride in a Pink Car                          | Emery, Robert J.                 | Robert J. Emery      | tt0078166 |
| 1745293666 | 2007 | 2007 | Fighting Words                                 | Fighting Words                              | Edwards, E. Paul                 | E. Paul Edwards      | tt0354578 |
| 1746260917 | 1978 | 1978 | High-Ballin'                                   | High Ballin'                                | Carter, Peter                    | Peter Carter         | tt0077679 |
| 1746434349 | 2000 | 2000 | Here on Earth                                  | Here on Earth                               | Piznarski, Mark                  | Mark Piznarski       | tt0195778 |
| 1746419164 | 1992 | 1992 | Pure Country                                   | Pure Country                                | Cain, Christopher                | Christopher Cain     | tt0105191 |
| 1746434982 | 1999 | 1999 | Just the Ticket                                | Just the Ticket                             | Wenk, Richard                    | Richard Wenk         | tt0123221 |
| 1746422541 | 1990 | 1990 | Welcome Home, Roxy Carmichael                  | Welcome Home, Roxy Carmichael               | Abrahams, Jim                    | Jim Abrahams         | tt0100911 |
| 1746434999 | 2000 | 2000 | Committed                                      | Committed                                   | Krueger, Lisa                    | John Mathews         | tt2470680 |
| 1746210537 | 1970 | 1970 | The Invincible Six                             | The Invincible Six                          | Negulesco, Jean                  | Jean Negulesco       | tt0063137 |
| 1746410722 | 1986 | 1986 | Witchboard                                     | Witchboard                                  | Tenney, Kevin S.                 | Kevin Tenney         | tt0090327 |
| 1746209677 | 1970 | 1970 | Brand X                                        | Brand X                                     | Chamberlain, Win                 | Win Chamberlain      | tt0174515 |
| 1745322684 | 2007 | 2006 | Skinwalkers                                    | Skinwalkers                                 | Isaac, James                     | James Isaac          | tt0461703 |
| 1746435342 | 1997 | 1997 | Shooting Porn                                  | Shooting Porn                               | Larsen, Ronnie                   | Ronnie Larsen        | tt0120123 |
| 1745341533 | 2009 | 2009 | Skiptracers                                    | Skiptracers                                 | Mendheim, Harris                 | Harris Mendheim      | tt1270847 |
| 1745282796 | 2007 | 2007 | Sex and Breakfast                              | Sex and Breakfast                           | Brandman, Miles                  | Miles Brandman       | tt0837803 |
| 1746423271 | 1993 | 1993 | I Am a Promise: The Children of Stanton Elemen | I Am a Promise: The Children of Stanton Ele | Raymond, Susan                   | Susan Raymond        | tt0107177 |
| 1746455693 | 1994 | 1994 | Golden Gate                                    | Golden Gate                                 | Madden, John                     | Randy Zisk           | tt0384974 |
| 1746453740 | 1996 | 1995 | Open Season                                    | Open Season                                 | Wuhl, Robert                     | Robert Wuhl          | tt0114047 |
| 1746408710 | 1988 | 1988 | Purple People Eater                            | Purple People Eater                         | Shayne, Linda                    | Linda Shayne         | tt0095930 |
| 1746211254 | 1971 | 1971 | Ruby                                           | Ruby                                        | Bartlett, Dick                   | Dick Bartlett        | tt0178007 |
| 1745309507 | 2005 | 2005 | Nowhere Man                                    | Nowhere Man                                 | McCann, Tim                      | Tim McCann           | tt0338294 |
| 1746454718 | 1997 | 1996 | Head Above Water                               | Head Above Water                            | Wilson, Jim                      | Jim Wilson           | tt0116502 |
| 1745360046 | 2004 | 2004 | Made-Up                                        | Make Up                                     | Shalhoub, Tony                   | Inbar Gilboa         | tt0484330 |
| 1746408514 | 1984 | 1984 | Another State of Mind                          | Another State of Mind                       | Small, Adam; Stuart, Peter       | Adam Small           | tt0198307 |
| 1746454535 | 1998 | 1998 | Treyf                                          | Treyf                                       | Lebow, Alisa; Madansky, Cynthia  | Alisa Lebow          | tt0177303 |
| 1746409301 | 1983 | 1983 | Man, Woman and Child                           | Man, Woman and Child                        | Richards, Dick                   | Dick Richards        | tt0085895 |
| 1746408471 | 1986 | 1986 | Last Resort                                    | Last Resort                                 | Buzby, Zane                      | Zane Buzby           | tt0091387 |
| 1746421596 | 1997 | 1997 | Gang Related                                   | Gang Related                                | Kouf, Jim                        | Jim Kouf             | tt0118900 |
| 1745342201 | 2010 | 2010 | Satan Hates You                                | Satan Hates You                             | McKenney, James Felix            | James Felix McKenney | tt0462516 |
| 1746199924 | 1970 | 1970 | What Do You Say to a Naked Lady?               | What Do You Say to a Naked Lady?            | Funt, Allen                      | Allen Funt           | tt0066559 |
| 1746410412 | 1981 | 1981 | An American Werewolf in London                 | An American Werewolf in London              | Landis, John                     | John Landis          | tt0082010 |
| 1745357948 | 2003 | 2003 | The Event                                      | The Vest                                    | Fitzgerald, Thom                 | Paul Gutrecht        | tt0339860 |
| 1746393667 | 1985 | 1985 | Troupers                                       | Troupers                                    | Silber, Glenn; Vianello, Claudia | Glenn Silber         | tt0176247 |
| 1745372644 | 2010 | 2010 | 100 Voices: A Journey Home                     | 100 Voices: A Journey Home                  | Asner, Matthew; Gold, Danny      | Matthew Asner        | tt1712005 |
| 1745373158 | 2011 | 2010 | Bloodworth                                     | Bloodworth                                  | Taylor, Shane Dax                | Shane Dax Taylor     | tt1421048 |
| 1746438020 | 2000 | 2000 | Fastpitch                                      | Fastpitch                                   | Spear, Jeremy                    | Jeremy Spear         | tt0258568 |
| 1746235086 | 1974 | 1973 | Pets                                           | Pets                                        | Nussbaum, Raphael                | Raphael Nussbaum     | tt0071992 |
| 1745309373 | 2005 | 2005 | Undiscovered                                   | Undiscovered                                | Avis, Meiert                     | Meiert Avis          | tt0434424 |
| 1746453690 | 1995 | 1995 | Feast of July                                  | Feast of July                               | Menaul, Christopher              | Christopher Menaul   | tt0113044 |
| 1745359472 | 2008 | 2008 | Jake's Corner                                  | Jake's Corner                               | Santo, Jeff                      | Jeff Santo           | tt1024746 |
| 1746393087 | 1986 | 1986 | Spark Among the Ashes: A Bar Mitzvah in Polanc | Spark Among the Ashes: A Bar Mitzvah in Po  | Rudavsky, Oren                   | Oren Rudavsky        | tt0348083 |
| 1745293545 | 2006 | 2005 | Through the Fire                               | Through the Fire                            | Hock, Jonathan                   | Alistair Christopher | tt0457502 |

|                   |             |             |                                               |                                                |                                      |                      |                  |
|-------------------|-------------|-------------|-----------------------------------------------|------------------------------------------------|--------------------------------------|----------------------|------------------|
| 1745372578        | 2010        | 2009        | 16 to Life                                    | 16 to Life                                     | Smith, Becky                         | Becky Smith          | tt1130087        |
| 1746421072        | 1991        | 1991        | Prime Target                                  | Prime Target                                   | Heavener, David                      | David Heavener       | tt0102710        |
| 1745374397        | 2008        | 2008        | Viva                                          | Vivo                                           | Biller, Anna                         | Jack C. Newell       | tt1388800        |
| 1746218930        | 1973        | 1973        | L'Amour                                       | L'Amour                                        | Warhol, Andy; Morrisey, Paul         | Paul Morrissey       | tt0210793        |
| 1746235813        | 1973        | 1973        | I. F. Stone's Weekly                          | I.F. Stone's Weekly                            | Bruck, Jerry                         | Jerry Bruck Jr.      | tt0070211        |
| 1746235052        | 1979        | 1979        | Boulevard Nights                              | Boulevard Nights                               | Pressman, Michael                    | Michael Pressman     | tt0078898        |
| 1745309135        | 2007        | 2006        | Even Money                                    | Even Money                                     | Rydell, Mark                         | Joseph Itaya         | tt0808256        |
| 1746394530        | 1992        | 1992        | Night and the City                            | Night and the City                             | Winkler, Irwin                       | Irwin Winkler        | tt0105001        |
| 1745374322        | 2003        | 2002        | On_Line                                       | On_Line                                        | Weintrob, Jed                        | Jed Weintrob         | tt0302889        |
| 1746410197        | 1988        | 1988        | Haunted Summer                                | Haunted Summer                                 | Passer, Ivan                         | Ivan Passer          | tt0095280        |
| 1745372882        | 2002        | 2002        | Teddy Bears' Picnic                           | Teddy Bears' Picnic                            | Shearer, Harry                       | Harry Shearer        | tt0250282        |
| 1745272913        | 2000        | 2000        | Two Family House                              | Two Family House                               | De Felitta, Raymond                  | Raymond De Felitta   | tt0202641        |
| 1746440018        | 1998        | 1998        | Next Stop Wonderland                          | Next Stop Wonderland                           | Anderson, Brad                       | Brad Anderson        | tt0119778        |
| 1745357720        | 2001        | 2000        | Greenfingers                                  | Greenfingers                                   | Hershman, Joel                       | Joel Hershman        | tt0203540        |
| 1746440304        | 1997        | 1997        | The Long Way Home                             | The Long Way Home                              | Harris, Mark Jonathan                | Mark Jonathan Harris | tt0119561        |
| 1746455968        | 1995        | 1995        | Othello                                       | Othello                                        | Parker, Oliver                       | Oliver Parker        | tt0114057        |
| 1745302605        | 2005        | 2004        | Ethan Mao                                     | Ethan Mao                                      | Lee, Quentin                         | Quentin Lee          | tt0430063        |
| 1746408653        | 1991        | 1991        | Raw Nerve                                     | Raw Nerve                                      | Prior, David A.                      | David A. Prior       | tt0102761        |
| 1746235045        | 1977        | 1977        | Audrey Rose                                   | Audrey Rose                                    | Wise, Robert                         | Robert Wise          | tt0075704        |
| 1746218675        | 1972        | 1972        | Glass Houses                                  | The Glass House                                | Singer, Alexander                    | Tom Gries            | tt0068642        |
| 1746422625        | 2000        | 2000        | Bookwars                                      | BookWars                                       | Rosette, Jason                       | Jason Rosette        | tt0250266        |
| 1745357952        | 2002        | 2002        | Maryam                                        | Maryam                                         | Serry, Ramin                         | Ramin Serry          | tt0184719        |
| 1746210575        | 1970        | 1970        | King: A Filmed Record ... Montgomery to Mempi | King: A Filmed Record... Montgomery to Memphis |                                      | Sidney Lumet         | tt0065944        |
| 1745309518        | 2005        | 2005        | Stolen Childhoods                             | Stolen Childhoods                              | Morris, Len                          | Len Morris           | tt0464216        |
| 1746211236        | 1970        | 1970        | The Delta Factor                              | The Delta Factor                               | Garnett, Tay                         | Tay Garnett          | tt0066981        |
| 1746409989        | 1984        | 1984        | Surf II                                       | Surf II                                        | Badat, Randall                       | Randall M. Badat     | tt0088207        |
| 1746272682        | 1979        | 1979        | The Bell Jar                                  | The Bell Jar                                   | Peerce, Larry                        | Larry Peerce         | tt0078843        |
| 1745309370        | 2004        | 2003        | Rhinoceros Eyes                               | Rhinoceros Eyes                                | Woodley, Aaron                       | Aaron Woodley        | tt0326065        |
| 1746455975        | 1995        | 1995        | Dr. Jekyll and Ms. Hyde                       | Dr. Jekyll and Ms. Hyde                        | Price, David                         | David Price          | tt0112895        |
| 1746455527        | 1998        | 1998        | Belly                                         | Belly                                          | Williams, Hype                       | Hype Williams        | tt0158493        |
| 1746249016        | 1976        | 1976        | Ode to Billy Joe                              | Ode to Billy Joe                               | Baer, Max                            | Max Baer Jr.         | tt0074995        |
| 1746455304        | 1999        | 1999        | Guinevere                                     | Guinevere                                      | Wells, Audrey                        | Audrey Wells         | tt0160338        |
| 1746202533        | 1970        | 1970        | Sweet Trash                                   | Sweet Trash                                    | Hayes, John                          | John Hayes           | tt0066426        |
| 1746420235        | 1991        | 1991        | Hearing Voices                                | Hearing Voices                                 | Greytak, Sharon                      | Sharon Greytak       | tt0193219        |
| 1746393687        | 1981        | 1980        | Cheaper to Keep Her                           | Cheaper to Keep Her                            | Annakin, Ken                         | Ken Annakin          | tt0080519        |
| 1745302366        | 2007        | 2006        | Smokin' Aces                                  | Smokin' Aces                                   | Carnahan, Joe                        | Joe Carnahan         | tt0475394        |
| 1745272262        | 2000        | 2000        | Scottsboro: An American Tragedy               | Scottsboro: An American Tragedy                | Goodman, Barak                       | Barak Goodman        | tt0240885        |
| 1746393760        | 1984        | 1984        | The Razor's Edge                              | The Razor's Edge                               | Byrum, John                          | John Byrum           | tt0087980        |
| 1746410685        | 1989        | 1989        | Sing                                          | Sing                                           | Baskin, Richard                      | Richard Baskin       | tt0098335        |
| 1746438552        | 1997        | 1997        | Bean                                          | Bean                                           | Smith, Mel                           | Mel Smith            | tt0118689        |
| <b>1746422640</b> | <b>1998</b> | <b>1997</b> | <b>Trouble on the Corner</b>                  | <b>Trouble on the Corner</b>                   | <b>Madison, Alan</b>                 | <b>Alan Madison</b>  | <b>tt0120379</b> |
| 1745293324        | 2005        | 2004        | Finding Eleazar                               | Finding Eleazar                                | Fisher, Paula Heil                   | Paula Heil Fisher    | tt0414014        |
| 1769973248        | 1970        | 1970        | Kama Sutra '71                                | Kama Sutra '71                                 |                                      | Raj Devi             | tt1868027        |
| 1745342526        | 2008        | 2008        | Adam Resurrected                              | Adam Resurrected                               | Schrader, Paul                       | Paul Schrader        | tt0479341        |
| 1746410526        | 1984        | 1984        | Blame It On the Night                         | Blame It on the Night                          | Taft, Gene                           | Gene Taft            | tt0086974        |
| 1746219717        | 1975        | 1975        | The Hiding Place                              | The Hiding Place                               | Collier, James F.                    | James F. Collier     | tt0073109        |
| 1746421677        | 1993        | 1992        | Just Another Girl on the I.R.T.               | Just Another Girl on the I.R.T.                | Harris, Leslie                       | Leslie Harris        | tt0104575        |
| 1746273868        | 1980        | 1980        | Heart Beat                                    | Heart Beat                                     | Byrum, John                          | John Byrum           | tt0080854        |
| 1746419941        | 1983        | 1983        | Daniel                                        | Daniel                                         | Lumet, Sidney                        | Sidney Lumet         | tt0085398        |
| 1745374043        | 2001        | 2001        | Inbred Rednecks                               | Inbred Rednecks                                | Warren, Joshua P.                    | Joshua P. Warren     | tt0289980        |
| 1745282550        | 2006        | 2006        | Living the Dream                              | Living the Dream                               | Fiterman, Allan ; Schoyen, Christian | Allan Fiterman       | tt0417909        |
| 1746419404        | 1989        | 1989        | Sidewalk Stories                              | Sidewalk Stories                               | Lane, Charles                        | Charles Lane         | tt0098325        |
| 1746439098        | 1998        | 1998        | True Friends                                  | True Friends                                   | Quattrochi, James                    | James Quattrochi     | tt0139669        |
| 1746210951        | 1972        | 1972        | Top of the Heap                               | Top of the Heap                                | St. John, Christopher                | Christopher St. John | tt0180254        |
| 1746409038        | 1988        | 1988        | The New Adventures of Pippi Longstocking      | The New Adventures of Pippi Longstocking       | Annakin, Ken                         | Ken Annakin          | tt0093744        |
| 1745359991        | 2003        | 2002        | The Rose Technique                            | The Rose Technique                             | Scheide, Jon                         | Jon C. Scheide       | tt0283574        |
| 1746419145        | 1994        | 1994        | Death and the Maiden                          | Death and the Maiden                           | Polanski, Roman                      | Roman Polanski       | tt0109579        |



|            |      |      |                                                            |                                                            |                                            |                      |           |
|------------|------|------|------------------------------------------------------------|------------------------------------------------------------|--------------------------------------------|----------------------|-----------|
| 1746434918 | 1990 | 1990 | The Long Walk Home                                         | The Long Walk Home                                         | Pearce, Richard                            | Richard Pearce       | tt0100046 |
| 1745341528 | 2008 | 2008 | Untraceable                                                | Untraceable                                                | Hoblitt, Gregory                           | Gregory Hoblitt      | tt0880578 |
| 1745372533 | 2002 | 2001 | The Attic Expeditions                                      | The Attic Expeditions                                      | Kasten, Jeremy                             | Jeremy Kasten        | tt0118652 |
| 1745272395 | 2000 | 2000 | Woman on Top                                               | Woman on Top                                               | Torres, Fina                               | Fina Torres          | tt0206420 |
| 1746210282 | 1970 | 1970 | Cover Me Babe                                              | Cover Me Babe                                              | Black, Noel                                | Noel Black           | tt0065582 |
| 1745303079 | 2007 | 2007 | Timber Falls                                               | Timber Falls                                               | Giglio, Tony                               | Tony Giglio          | tt0857295 |
| 1746419789 | 1993 | 1993 | The Cemetery Club                                          | The Cemetery Club                                          | Duke, Bill                                 | Bill Duke            | tt0106536 |
| 1746260207 | 1979 | 1978 | Battlestar Galactica                                       | Battlestar Galactica                                       | Colla, Richard A.                          | Richard A. Colla     | tt0077215 |
| 1746269629 | 1975 | 1974 | The Land That Time Forgot                                  | The Land That Time Forgot                                  | Connor, Kevin                              | Kevin Connor         | tt0073260 |
| 1746235236 | 1973 | 1973 | The Boy Who Cried Werewolf                                 | The Boy Who Cried Werewolf                                 | Juran, Nathan H.                           | Nathan Juran         | tt0069820 |
| 1746250342 | 1978 | 1978 | Northern Lights                                            | Northern Lights                                            | Hanson, John; Nilsson, Rob                 | John Hanson          | tt0078008 |
| 1745271944 | 2000 | 2000 | Prince of Central Park                                     | Prince of Central Park                                     | Leekley, John                              | John Leekley         | tt0170452 |
| 1745302272 | 2006 | 2006 | Resilience                                                 | Resilience                                                 | Bojack, Paul                               | Paul Bojack          | tt0814290 |
| 1746437572 | 1999 | 1999 | Simon Sez                                                  | Simon Sez                                                  | Elders, Kevin                              | Kevin Alyn Elders    | tt0168172 |
| 1746409428 | 1984 | 1983 | Brady's Escape                                             | Brady's Escape                                             | Gábor, Pál                                 | Pál Gábor            | tt0085688 |
| 1745293727 | 2005 | 2004 | Yes                                                        | Yes                                                        | Potter, Sally                              | Sally Potter         | tt0381717 |
| 1746408688 | 1983 | 1983 | Going Berserk                                              | Going Berserk                                              | Steinberg, David                           | David Steinberg      | tt0085603 |
| 1746219399 | 1974 | 1974 | Welcome to Arrow Beach                                     | Welcome to Arrow Beach                                     | Harvey, Laurence                           | Laurence Harvey      | tt0072392 |
| 1745360055 | 2004 | 2004 | Dig!                                                       | Dig!                                                       | Timoner, Ondi                              | Aaron Kisner         | tt0461201 |
| 1746409057 | 1989 | 1989 | Gleaming the Cube                                          | Gleaming the Cube                                          | Clifford, Graeme                           | Graeme Clifford      | tt0097438 |
| 1745282905 | 2005 | 2005 | November                                                   | November                                                   | Harrison, Greg                             | Rick Short           | tt0479112 |
| 1746453903 | 2000 | 2000 | Into the Arms of Strangers: Stories of the Kindertransport | Into the Arms of Strangers: Stories of the Kindertransport | Harris, Mark Jonathan                      | Mark Jonathan Harris | tt0248912 |
| 1745342656 | 2011 | 2010 | Waiting for Forever                                        | Waiting for Forever                                        | Keach, James                               | James Keach          | tt1296898 |
| 1746422160 | 1997 | 1997 | 4 Little Girls                                             | 4 Little Girls                                             | Lee, Spike                                 | Spike Lee            | tt0118540 |
| 1745374757 | 2010 | 2009 | Cropsey                                                    | Cropsey                                                    | Zeman, Joshua; Brancaccio, Barbara         | Barbara Brancaccio   | tt1277936 |
| 1746219554 | 1975 | 1975 | Friday Foster                                              | Friday Foster                                              | Marks, Arthur                              | Arthur Marks         | tt0073019 |
| 1746219755 | 1974 | 1974 | Together Brothers                                          | Together Brothers                                          | Graham, William A.                         | William A. Graham    | tt0072300 |
| 1745309162 | 2007 | 2006 | Goya's Ghosts                                              | Goya's Ghosts                                              | Forman, Milos                              | Milos Forman         | tt0455957 |
| 1745293222 | 2005 | 2005 | Walking on the Sky                                         | Walking on the Sky                                         | Evans, Carl T.                             | Carl T. Evans        | tt0369048 |
| 1745342651 | 2002 | 2002 | The Face of Evil: Reinhard Heydrich                        | The Face of Evil: Reinhard Heydrich                        | Chesser, Chris; Beattie, Alan; Corry, John | Robert Beemer        | tt0433560 |
| 1745340940 | 2001 | 2001 | Sorority Girls' Revenge                                    | Sorority Girls' Revenge                                    | Warn, Keith                                | Keith Warn           | tt0295715 |
| 1746199597 | 1970 | 1970 | Homer                                                      | Homer                                                      | Trent, John                                | John Trent           | tt0065847 |
| 1745373420 | 2003 | 2004 | Hotel Room                                                 | Hotel Room                                                 | Gay, Cesc ; Gimelberg, Daniel              | Frederic Lumiere     | tt0470062 |
| 1745282542 | 2005 | 2005 | Milk and Honey                                             | Milk & Honey                                               | Maggio, Joe                                | Kyle Graffam         | tt0455630 |
| 1745342857 | 2003 | 2003 | Attitude                                                   | Attitude                                                   | Nilsson, Rob                               | Rob Nilsson          | tt0321321 |
| 1746420098 | 1994 | 1993 | Deadfall                                                   | Deadfall                                                   | Coppola, Christopher                       | Christopher Coppola  | tt0106684 |
| 1745396007 | 2011 | 2010 | I'm Dangerous with Love                                    | I'm Dangerous with Love                                    | Negroponte, Michel                         | Michel Negroponte    | tt1327928 |
| 1746202244 | 1970 | 1970 | Africa Erotica                                             | Africa Erotica                                             | Sulistrowski, Zygmunt                      | Louis Soulanes       | tt0189634 |
| 1746433732 | 1997 | 1997 | Tar                                                        | Tears                                                      | Grossmann, Goetz                           | Brad Sykes           | tt4572312 |
| 1745342700 | 2002 | 2002 | White Boy                                                  | White Boy                                                  | Marino, John                               | John Marino          | tt0161088 |
| 1746435374 | 1996 | 1996 | The Substance of Fire                                      | The Substance of Fire                                      | Sullivan, Daniel                           | Daniel J. Sullivan   | tt0117773 |
| 1745341817 | 2004 | 2004 | New York Minute                                            | New York Minute                                            | Gordon, Dennie                             | Michael J. Arbouet   | tt0439263 |
| 1746420873 | 1996 | 1996 | Love & Sex Etc.                                            | Love & Sex etc.                                            | Yost, Daniel                               | Daniel Yost          | tt0116925 |
| 1746270068 | 1980 | 1980 | Defiance                                                   | Defiance                                                   | Flynn, John                                | John Flynn           | tt0080605 |
| 1745293226 | 2007 | 2006 | I'm Reed Fish                                              | I'm Reed Fish                                              | Adler, Zackary                             | Zackary Adler        | tt0464061 |
| 1745374512 | 2008 | 2008 | P.J.                                                       | P.J.                                                       | Emanuel, Russ                              | Russ Emanuel         | tt0914380 |
| 1769974198 | 1970 | 1970 | Shoot-out at Beaver Falls                                  | Shoot out at Beaver Falls                                  | August, Harry                              | Harry Petricek       | tt0257177 |
| 1746249042 | 1977 | 1977 | Twilight's Last Gleaming                                   | Twilight's Last Gleaming                                   | Aldrich, Robert                            | Robert Aldrich       | tt0076845 |
| 1745309492 | 2005 | 2005 | What Remains                                               | What Remains                                               | Cantor, Steven                             | Steven Cantor        | tt0483836 |
| 1746434003 | 1999 | 1999 | Endurance                                                  | Endurance                                                  | Woodhead, Leslie                           | Leslie Woodhead      | tt0120659 |
| 1746408644 | 1988 | 1988 | The Suicide Club                                           | The Suicide Club                                           | Bruce, James                               | James Bruce          | tt0096186 |
| 1746235645 | 1976 | 1976 | Kristina Talking Pictures                                  | Kristina Talking Pictures                                  | Rainer, Yvonne                             | Yvonne Rainer        | tt0074763 |
| 1745359865 | 2009 | 2008 | Gotta Dance                                                | Gotta Dance                                                | Berinstein, Dori                           | Dori Berinstein      | tt1202566 |
| 1745372856 | 2010 | 2009 | Racing Dreams                                              | Racing Dreams                                              | Curry, Marshall                            | Marshall Curry       | tt1152840 |
| 1746409282 | 1990 | 1990 | The Judas Project                                          | The Judas Project                                          | Barden, James H.                           | James H. Barden      | tt0107284 |
| 1746235287 | 1974 | 1974 | Solomon King                                               | Solomon King                                               | Bomay, Jack; Watts, Sal                    | Jack Bomay           | tt0072187 |
| 1746419911 | 1992 | 1991 | Desire and Hell at Sunset Motel                            | Desire and Hell at Sunset Motel                            | Castle, Alien                              | Alien Castle         | tt0104088 |

|            |      |      |                                               |                                              |                                   |                    |           |
|------------|------|------|-----------------------------------------------|----------------------------------------------|-----------------------------------|--------------------|-----------|
| 1745373793 | 2007 | 2006 | Away from Her                                 | Away from Her                                | Polley, Sarah                     | Sarah Polley       | tt0491747 |
| 1746219188 | 1973 | 1973 | Sunseed                                       | Sunseed                                      | Cohn, Fredrick                    | Frederick Cohn     | tt0948127 |
| 1745372604 | 2008 | 2007 | The Gay Bed and Breakfast of Terror           | The Gay Bed and Breakfast of Terror          | Thompson, Jaymes                  | Jaymes Thompson    | tt0815165 |
| 1746394196 | 1983 | 1983 | Second Thoughts                               | Second Thoughts                              | Turman, Lawrence                  | Lawrence Turman    | tt0086269 |
| 1746434253 | 2000 | 2001 | Cupid's Mistake                               | Cupid's Mistake                              | Kang, Young Man                   | Young Man Kang     | tt0213582 |
| 1746211087 | 1973 | 1974 | Injun Fender                                  | Injun fender                                 | Cordier, Robert                   | Robert Cordier     | tt0407889 |
| 1746249796 | 1976 | 1976 | Birch Interval                                | Birch Interval                               | Mann, Delbert                     | Delbert Mann       | tt0075756 |
| 1746235374 | 1974 | 1974 | Candy Stripe Nurses                           | Candy Stripe Nurses                          | Holleb, Alan                      | Alan Holleb        | tt0071274 |
| 1745359592 | 2004 | 2003 | Particles of Truth                            | Particles of Truth                           | Elster, Jennifer                  | Jennifer Elster    | tt0320241 |
| 1745395989 | 2010 | 2009 | Neil Young Trunk Show                         | Neil Young Trunk Show                        | Demme, Jonathan                   | Jonathan Demme     | tt1236244 |
| 1746573729 | 1962 | 1962 | Belle Sommers                                 | Belle Sommers                                | Silverstein, Elliot               | Elliot Silverstein | tt0055786 |
| 1746258178 | 1979 | 1978 | Barracuda                                     | Barracuda                                    | Kerwin, Harry                     | Harry Kerwin       | tt0077210 |
| 1746256780 | 1980 | 1980 | Death Ship                                    | Death Ship                                   | Rakoff, Alvin                     | Alvin Rakoff       | tt0080603 |
| 1746219204 | 1974 | 1974 | Lovin' Molly                                  | Lovin' Molly                                 | Lumet, Sidney                     | Sidney Lumet       | tt0071780 |
| 1745394310 | 2009 | 2009 | Oy Vey! My Son Is Gay!                        | Oy Vey! My Son Is Gay!!                      | Afineevsky, Evgeny                | Evgeny Afineevsky  | tt1223082 |
| 1746394014 | 1989 | 1989 | Romero                                        | Romero                                       | Duigan, John                      | John Duigan        | tt0098219 |
| 1746420144 | 1994 | 1994 | The Road to Wellville                         | The Road to Wellville                        | Parker, Alan                      | Alan Parker        | tt0111001 |
| 1745374453 | 2011 | 2010 | One Lucky Elephant                            | One Lucky Elephant                           | Leeman, Lisa                      | Lisa Leeman        | tt1053902 |
| 1745341201 | 2002 | 2002 | Back Against the Wall                         | Back Against the Wall                        | Fotopoulos, James                 | James Fotopoulos   | tt0312408 |
| 1746419767 | 1993 | 1993 | Malice                                        | Malice                                       | Becker, Harold                    | Harold Becker      | tt0107497 |
| 1745302661 | 2007 | 2006 | The Hawk Is Dying                             | The Hawk Is Dying                            | Goldberger, Julian                | Julian Goldberger  | tt0412808 |
| 1746422649 | 1998 | 1998 | Palmetto                                      | Palmetto                                     | Schlöndorff, Volker               | Volker Schlöndorff | tt0120782 |
| 1745359430 | 2002 | 2002 | Stevie                                        | Stevie                                       | James, Steve                      | Steve James        | tt0334416 |
| 1746219646 | 1971 | 1971 | The Grissom Gang                              | The Grissom Gang                             | Aldrich, Robert                   | Robert Aldrich     | tt0067162 |
| 1745293857 | 2007 | 2006 | Hoboken Hollow                                | Hoboken Hollow                               | Stephens, Glen                    | Glen Stephens      | tt0455961 |
| 1746454586 | 1998 | 1998 | Hallelujah! Ron Athey: A Story of Deliverance | Hallelujah! Ron Athey: A Story of Deliveranc | Saalfeld, Catherine Gund          | Catherine Gund     | tt0180730 |
| 1745293978 | 2007 | 2007 | King Corn                                     | King Corn                                    | Woolf, Aaron                      | Aaron Woolf        | tt1112115 |
| 1746210185 | 1971 | 1971 | The Beast of the Yellow Night                 | Beast of the Yellow Night                    | Romero, Eddie                     | Eddie Romero       | tt0066816 |
| 1746218673 | 1972 | 1972 | Tomorrow                                      | Tomorrow                                     | Anthony, Joseph                   | Joseph Anthony     | tt0069393 |
| 1746455125 | 2000 | 2000 | Backstage                                     | Backstage                                    | Fiore, Chris                      | Chris Fiore        | tt0259207 |
| 1746419380 | 1992 | 1991 | Hard Promises                                 | Hard Promises                                | Davidson, Martin                  | Martin Davidson    | tt0102002 |
| 1746410708 | 1987 | 1987 | Project X                                     | Project X                                    | Kaplan, Jonathan                  | Jonathan Kaplan    | tt0093793 |
| 1746410810 | 1994 | 1994 | Trial by Jury                                 | Trial by Jury                                | Gould, Heywood                    | Heywood Gould      | tt0111488 |
| 1746235343 | 1973 | 1972 | A Day at the White House                      | A Day at the White House                     | Bennion, Nicholas                 | Nick Bennion       | tt1428437 |
| 1746210587 | 1971 | 1971 | The Late Liz                                  | The Late Liz                                 | Ross, Dick                        | Dick Ross          | tt0067331 |
| 1746408678 | 1986 | 1986 | Billy Galvin                                  | Billy Galvin                                 | Gray, John                        | John Gray          | tt0090730 |
| 1746218746 | 1971 | 1971 | Who Killed Mary Whats'ername?                 | Who Killed Mary Whats'ername?                | Pintoff, Ernie                    | Ernest Pintoff     | tt0067981 |
| 1746410605 | 1982 | 1982 | Love Child                                    | Love Child                                   | Peerce, Larry                     | Larry Peerce       | tt0084273 |
| 1746409048 | 1989 | 1989 | Valentino Returns                             | Valentino Returns                            | Hoffman, Peter                    | Peter Hoffman      | tt0094236 |
| 1746420395 | 1990 | 1989 | Chattahoochee                                 | Chattahoochee                                | Jackson, Mick                     | Mick Jackson       | tt0099242 |
| 1746219160 | 1976 | 1975 | Mackintosh & T. J.                            | Mackintosh and T.J.                          | Chomsky, Marvin J.                | Marvin J. Chomsky  | tt0073328 |
| 1745393728 | 2009 | 2009 | Dare                                          | Dare                                         | Salky, Adam                       | Adam Salky         | tt1241316 |
| 1746211270 | 1970 | 1970 | Wilbur and the Baby Factory                   | Wilbur and the Baby Factory                  | Wolfe, Tom                        | Tom McGowan        | tt0065213 |
| 1746410866 | 1986 | 1985 | Huey Long                                     | Huey Long                                    | Burns, Ken                        | Ken Burns          | tt0089310 |
| 1746218822 | 1976 | 1975 | The Legend of Bigfoot                         | The Legend of Bigfoot                        | Winer, Harry Stuart               | Harry Winer        | tt0279919 |
| 1746218914 | 1975 | 1975 | The Challenge... A Tribute to Modern Art      | The Challenge... A Tribute to Modern Art     | Kline, Herbert                    | Herbert Kline      | tt0071299 |
| 1745372529 | 2004 | 2004 | Six Characters in Search of America           | Six Characters in Search of America          | Wolf, Rachel ; Farber, Jay Jordan | Jay Jordan Farber  | tt0430599 |
| 1746410187 | 1985 | 1985 | Streetwalkin'                                 | Streetwalkin'                                | Freeman, Joan                     | Joan Freeman       | tt0088195 |
| 1745293700 | 2006 | 2006 | Saint of 9/11                                 | Saint of 9/11                                | Holsten, Glenn                    | Glenn Holsten      | tt0795458 |
| 1746393518 | 1982 | 1982 | Penitentiary II                               | Penitentiary II                              | Fanaka, Jamaa                     | Jamaa Fanaka       | tt0084485 |
| 1745303142 | 2005 | 2005 | The Prize Winner of Defiance, Ohio            | The Prize Winner of Defiance, Ohio           | Anderson, Jane                    | Jane Anderson      | tt0406158 |
| 1746419923 | 1989 | 1988 | Earth Girls Are Easy                          | Earth Girls Are Easy                         | Temple, Julien                    | Julien Temple      | tt0097257 |
| 1745342441 | 2001 | 2001 | Summer Catch                                  | Summer Catch                                 | Tollin, Mike                      | Michael Tollin     | tt0234829 |
| 1746455269 | 1999 | 1999 | Whiteboys                                     | Whiteboyz                                    | Levin, Marc                       | Marc Levin         | tt0178988 |
| 1746210958 | 1970 | 1970 | The Naked Zoo                                 | The Naked Zoo                                | Grefé, William                    | William Grefé      | tt0067476 |
| 1746408647 | 1992 | 1992 | Traces of Red                                 | Traces of Red                                | Wolk, Andy                        | Andy Wolk          | tt0105631 |
| 1746422246 | 1991 | 1990 | Prayer of the Rollerboys                      | Prayer of the Rollerboys                     | King, Rick                        | Rick King          | tt0102703 |

|                   |             |             |                                                 |                                            |                                |                      |                  |
|-------------------|-------------|-------------|-------------------------------------------------|--------------------------------------------|--------------------------------|----------------------|------------------|
| 1745374485        | 2008        | 2007        | Dalai Lama Renaissance                          | Dalai Lama Renaissance                     | Darvich, Khashyar              | Khashyar Darvich     | tt0953363        |
| 1746455248        | 1995        | 1995        | Riders in the Storm                             | Riders in the Storm                        | Biggs, Charles                 | Charles Biggs        | tt0114283        |
| 1746455705        | 1996        | 1996        | Mandela                                         | Mandela                                    | Menell, Jo; Gibson, Angus      | Angus Gibson         | tt0116980        |
| 1745293671        | 2005        | 2004        | The Time We Killed                              | The Time We Killed                         | Reeves, Jennifer Todd          | Jennifer Todd Reeves | tt0401831        |
| <b>1746210175</b> | <b>1970</b> | <b>1970</b> | <b>A Walk in the Spring Rain</b>                | <b>A Walk in the Spring Rain</b>           | <b>Green, Guy</b>              | <b>Guy Green</b>     | <b>tt0066542</b> |
| 1746453893        | 1998        | 1997        | Little Men                                      | Little Men                                 | Gibbons, Rodney                | Amyr Kaderali        | tt0261020        |
| 1745272035        | 2001        | 2001        | Bridget Jones's Diary                           | Bridget Jones's Diary                      | Maguire, Sharon                | Sharon Maguire       | tt0243155        |
| 1745374434        | 2010        | 2009        | What's the Matter with Kansas?                  | What's the Matter with Kansas?             | Winston, Joe                   | Joe Winston          | tt1323977        |
| 1746219112        | 1972        | 1972        | Horror on Snape Island                          | Horror on Snape Island                     | O'Connolly, Jim                | Jim O'Connolly       | tt0068716        |
| 1746271814        | 1980        | 1980        | The Offenders                                   | The Offenders                              | B, Scott; B, Beth              | Beth B               | tt0081265        |
| 1746219388        | 1974        | 1974        | Mixed Company                                   | Mixed Company                              | Shavelson, Melville            | Melville Shavelson   | tt0071850        |
| 1745272666        | 2001        | 2001        | Carman: The Champion                            | Carman: The Champion                       | Stanley, Lee                   | Lee Stanley          | tt0262462        |
| 1745302260        | 2004        | 2004        | Stateside                                       | Stateside                                  | Anselmo, Reverage              | Reverage Anselmo     | tt0339727        |
| 1746408667        | 1987        | 1986        | My Little Girl                                  | My Little Girl                             | Kaiserman, Connie              | Connie Kaiserman     | tt0091583        |
| 1746235306        | 1980        | 1980        | The First Deadly Sin                            | The First Deadly Sin                       | Hutton, Brian G.               | Brian G. Hutton      | tt0080738        |
| 1746410559        | 1981        | 1981        | Earthbound                                      | Earthbound                                 | Conway, James L.               | James L. Conway      | tt0082308        |
| 1746408487        | 1983        | 1983        | Deadly Force                                    | Deadly Force                               | Aaron, Paul                    | Paul Aaron           | tt0085409        |
| 1745309368        | 2006        | 2006        | Come Early Morning                              | Come Early Morning                         | Adams, Joey Lauren             | Joey Lauren Adams    | tt0457308        |
| 1745342284        | 2001        | 2000        | As I Was Moving Ahead, Occasionally I Saw Brief | As I Was Moving Ahead Occasionally I Saw B | Mekas, Jonas                   | Jonas Mekas          | tt0262240        |
| 1746235571        | 1978        | 1978        | A Different Story                               | A Different Story                          | Aaron, Paul                    | Paul Aaron           | tt0077435        |
| 1746393558        | 1985        | 1985        | The Trip to Bountiful                           | The Trip to Bountiful                      | Masterson, Peter               | Peter Masterson      | tt0090203        |
| 1745342861        | 2009        | 2008        | We Pedal Uphill                                 | We Pedal Uphill                            | Tec, Roland                    | Roland Tec           | tt0815229        |
| 1746455544        | 1999        | 1999        | Bastards                                        | Bastards                                   | Do, Loc                        | Loc Do               | tt0139882        |
| 1745359873        | 2004        | 2004        | Straight Jacket                                 | Straight Jacket                            | Day, Richard                   | Richard Day          | tt0367097        |
| 1746455008        | 1997        | 1997        | Family Name                                     | Family Name                                | Alston, Macky                  | Macky Alston         | tt0119104        |
| 1746251370        | 1978        | 1978        | Born Again                                      | Born Again                                 | Rapper, Irving                 | Irving Rapper        | tt0077261        |
| 1746260583        | 1979        | 1979        | When You Comin' Back, Red Ryder                 | When You Comin' Back, Red Ryder?           | Katselas, Milton               | Milton Katselas      | tt0080129        |
| 1746258682        | 1977        | 1977        | Outlaw Blues                                    | Outlaw Blues                               | Heffron, Richard T.            | Richard T. Heffron   | tt0076512        |
| 1746219117        | 1976        | 1976        | Freaky Friday                                   | Freaky Friday                              | Nelson, Gary                   | Gary Nelson          | tt0076054        |
| 1746410523        | 1987        | 1987        | Housekeeping                                    | Housekeeping                               | Forsyth, Bill                  | Bill Forsyth         | tt0093225        |
| 1745341764        | 2010        | 2010        | Marwencol                                       | Marwencol                                  | Malmberg, Jeff                 | Jeff Malmberg        | tt1391092        |
| 1746210454        | 1972        | 1972        | Necromancy                                      | Necromancy                                 | Gordon, Bert I.                | Bert I. Gordon       | tt0068994        |
| 1746408483        | 1984        | 1984        | Swing Shift                                     | Swing Shift                                | Demme, Jonathan                | Jonathan Demme       | tt0088213        |
| 1746422586        | 1994        | 1994        | Threesome                                       | Threesome                                  | Fleming, Andrew                | Andrew Fleming       | tt0111418        |
| 1746393061        | 1988        | 1988        | Hanna's War                                     | Hanna's War                                | Golan, Menahem                 | Menahem Golan        | tt0095275        |
| 1746410198        | 1990        | 1990        | Tune in Tomorrow...                             | Tune in Tomorrow...                        | Amiel, Jon                     | Jon Amiel            | tt0100822        |
| 1746408451        | 1989        | 1989        | Lock Up                                         | Lock Up                                    | Flynn, John                    | John Flynn           | tt0097770        |
| 1746408838        | 1989        | 1988        | Funny                                           | Funny                                      | Ferren, Bran                   | Bran Ferren          | tt0097403        |
| 1746219534        | 1974        | 1974        | 99 and 44/100% Dead                             | 99 and 44/100% Dead                        | Frankenheimer, John            | John Frankenheimer   | tt0071089        |
| 1746410411        | 1988        | 1988        | Full Moon in Blue Water                         | Full Moon in Blue Water                    | Masterson, Peter               | Peter Masterson      | tt0095186        |
| 1745357600        | 2010        | 2010        | Stone                                           | Stone                                      | Curran, John                   | John Curran          | tt1423995        |
| 1745358671        | 2008        | 2008        | Extra Ordinary Barry                            | Extra Ordinary Barry                       | Stafford, Vivi                 | Vivi Stafford        | tt0903133        |
| 1746422227        | 1999        | 1998        | Out of Season                                   | Out of Season                              | Buck, Jeanette L.              | Jeanette L. Buck     | tt0177080        |
| 1746409049        | 1987        | 1986        | Working Girls                                   | Working Girls                              | Borden, Lizzie                 | Lizzie Borden        | tt0092238        |
| 1745359927        | 2011        | 2010        | Phil Ochs: There but for Fortune                | Phil Ochs: There But for Fortune           | Bowser, Kenneth                | Kenneth Bowser       | tt1597089        |
| 1746438595        | 1997        | 1996        | Color of a Brisk & Leaping Day                  | Color of a Brisk and Leaping Day           | Munch, Christopher             | Christopher Munch    | tt0115925        |
| 1746393466        | 1983        | 1983        | Eddie Macon's Run                               | Eddie Macon's Run                          | Kanew, Jeff                    | Jeff Kanew           | tt0085473        |
| 1746422942        | 1993        | 1992        | Female Misbehavior                              | Female Misbehavior                         | Treut, Monika                  | Monika Treut         | tt0104249        |
| 1745373307        | 2010        | 2009        | Chloe                                           | Chloe                                      | Egoyan, Atom                   | Atom Egoyan          | tt1352824        |
| 1746409095        | 1991        | 1991        | Dead Space                                      | Dead Space                                 | Gallo, Fred                    | Fred Gallo           | tt0101675        |
| 1746211067        | 1970        | 1970        | Macho Callahan                                  | Macho Callahan                             | Kowalski, Bernard L.           | Bernard L. Kowalski  | tt0066033        |
| 1746435923        | 2000        | 1999        | Dreamers                                        | Dreamers                                   | Lu, Ann                        | Ann Lu               | tt0160229        |
| 1746408623        | 1988        | 1988        | Sunset                                          | Sunset                                     | Edwards, Blake                 | Blake Edwards        | tt0096193        |
| 1746408893        | 1983        | 1982        | The State of Things                             | The State of Things                        | Wenders, Wim                   | Wim Wenders          | tt0084725        |
| 1746249256        | 1975        | 1975        | The World Through the Eyes of Children          | The World Through the Eyes of Children     | Rodgers, Jimmie; Williams, Bob | Jimmie Rodgers       | tt1599368        |
| 1746408662        | 1983        | 1982        | Say Amen, Somebody                              | Say Amen, Somebody                         | T. Nierenberg, George          | George T. Nierenberg | tt0086245        |
| 1769974212        | 1970        | 1970        | The Bang Bang Gang                              | The Bang Bang Gang                         | Guylder, Van                   | Van Guylder          | tt0177530        |

|                   |             |             |                                           |                                           |                                    |                      |                  |
|-------------------|-------------|-------------|-------------------------------------------|-------------------------------------------|------------------------------------|----------------------|------------------|
| 1746394655        | 1984        | 1984        | Toy Soldiers                              | Toy Soldiers                              | Fisher, David                      | David Fisher         | tt0088292        |
| 1745294053        | 2007        | 2007        | The Golden Compass                        | The Golden Compass                        | Weitz, Chris                       | Chris Weitz          | tt0385752        |
| 1746219183        | 1972        | 1972        | The Loners                                | The Loners                                | Roley, Sutton                      | Sutton Roley         | tt0068873        |
| 1745282780        | 2007        | 2006        | Lake of Fire                              | Lake of Fire                              | Kaye, Tony                         | Tony Kaye            | tt0841119        |
| 1745373161        | 2008        | 2008        | Fool's Gold                               | Fool's Gold                               | Tennant, Andy                      | Matthew Page         | tt1351148        |
| 1746260908        | 1979        | 1979        | French Postcards                          | French Postcards                          | Huyck, Willard                     | Willard Huyck        | tt0079176        |
| 1746394228        | 1988        | 1988        | The House on Carroll Street               | The House on Carroll Street               | Yates, Peter                       | Peter Yates          | tt0095333        |
| 1746420353        | 1988        | 1988        | Freeway                                   | Freeway                                   | Delia, Francis                     | Francis Delia        | tt0095177        |
| 1746210504        | 1970        | 1970        | The Sidelong Glances of a Pigeon Kicker   | The Sidelong Glances of a Pigeon Kicker   | Dexter, John                       | John Dexter          | tt0067576        |
| 1745394525        | 2010        | 2009        | Trust Us, This Is All Made Up             | Trust Us, This Is All Made Up             | Karpovsky, Alex                    | Alex Karpovsky       | tt1370803        |
| 1769973242        | 1970        | 1970        | Cindy and Donna                           | Cindy and Donna                           | Anderson, Robert                   | Robert Anderson      | tt0154330        |
| 1746394402        | 1984        | 1984        | Misunderstood                             | Misunderstood                             | Schatzberg, Jerry                  | Jerry Schatzberg     | tt0087730        |
| 1746435851        | 2000        | 1999        | Creature                                  | Creature                                  | Patton, Parris                     | Parris Patton        | tt0198385        |
| 1745302510        | 2006        | 2005        | Following Sean                            | Following Sean                            | Arlyck, Ralph                      | Ralph Arlyck         | tt0479916        |
| 1745309443        | 2007        | 2007        | Chops                                     | Chope                                     | Broder, Bruce                      | Mike Fishbein        | tt1087796        |
| 1746210791        | 1971        | 1970        | Bright College Years                      | Bright College Years                      | Rosen, Peter                       | Peter Rosen          | tt1587748        |
| 1746437561        | 1997        | 1997        | Tomorrow Never Dies                       | Tomorrow Never Dies                       | Spottiswoode, Roger                | Roger Spottiswoode   | tt0120347        |
| 1746393550        | 1988        | 1988        | Defense Play                              | Defense Play                              | Markham, Monte                     | Monte Markham        | tt0094981        |
| 1746419402        | 1986        | 1986        | Rise and Fall of the Borscht Belt         | Rise and Fall of the Borscht Belt         | Davis, Peter                       | Peter Davis          | tt0299115        |
| 1746235511        | 1978        | 1977        | Speedtrap                                 | Speedtrap                                 | Bellamy, Earl                      | Earl Bellamy         | tt0076746        |
| 1745393667        | 2008        | 2008        | The Women                                 | The Women                                 | English, Diane                     | Lindsay Jaeger       | tt1202756        |
| 1745293756        | 2006        | 2006        | An Unreasonable Man                       | An Unreasonable Man                       | Mantel, Henriette ; Skrovan, Steve | Henriette Mantel     | tt0492499        |
| 1746500584        | 1950        | 1950        | Border Outlaws                            | Border Outlaws                            | Talmadge, Richard                  | Richard Talmadge     | tt0042271        |
| 1746235196        | 1971        | 1970        | American Wilderness                       | American Wilderness                       | Dubs, A. R.                        | Arthur R. Dubs       | tt0068201        |
| 1769971957        | 1969        | 1969        | Sensation Generation                      | Sensation Generation                      |                                    | Rex Sampson          | tt0123258        |
| 1746454426        | 2000        | 2000        | The Contender                             | The Contender                             | Lurie, Rod                         | Tim Reid             | tt2586886        |
| 1746437552        | 1998        | 1998        | Weed                                      | The Need                                  | Wolens, Doug                       | Tom Gustafson        | tt1384810        |
| 1746421998        | 1997        | 1997        | Year of the Horse                         | Year of the Horse                         | Jarmusch, Jim                      | Jim Jarmusch         | tt0120539        |
| 1746475900        | 1947        | 1947        | The Gas House Kids "in Hollywood"         | The Gas House Kids in Hollywood           | Cahn, Edward                       | Edward L. Cahn       | tt0039412        |
| 1746269471        | 1977        | 1977        | The Child                                 | The Child                                 | Voskarian, Robert                  | Robert Voskarian     | tt0075838        |
| 1746235295        | 1972        | 1972        | The Great Northfield Minnesota Raid       | The Great Northfield Minnesota Raid       | Kaufman, Philip                    | Philip Kaufman       | tt0068661        |
| 1745342217        | 2009        | 2008        | Mary Pickford: The Muse of the Movies     | Mary Pickford: The Muse of the Movies     | Eliopoulos, Nicholas               | Nicholas Eliopoulos  | tt1332023        |
| 1746219407        | 1973        | 1973        | Marco                                     | Marco                                     | Robbie, Seymour                    | Seymour Robbie       | tt0070371        |
| <b>1746218585</b> | <b>1972</b> | <b>1972</b> | <b>Here Comes Every Body</b>              | <b>Here Comes Every Body</b>              | <b>Whitmore, John</b>              | <b>John Whitmore</b> | <b>tt0179845</b> |
| 1746210625        | 1971        | 1971        | Octaman                                   | Octaman                                   | Essex, Harry                       | Harry Essex          | tt0067515        |
| 1746434861        | 1990        | 1990        | I Love You to Death                       | I Love You to Death                       | Kasdan, Lawrence                   | Lawrence Kasdan      | tt0099819        |
| 1746423051        | 1994        | 1994        | Blown Away                                | Blown Away                                | Hopkins, Stephen                   | Stephen Hopkins      | tt0109303        |
| 1745309154        | 2007        | 2007        | The Parallel                              | The Parallel                              | Piandaryan, Jack                   | Jack Piandaryan      | tt0758773        |
| 1746218852        | 1971        | 1971        | The Trojan Women                          | The Trojan Women                          | Cacoyannis, Michael                | Mihalis Kakogiannis  | tt0067881        |
| 1745309343        | 2007        | 2007        | Harry Potter and the Order of the Phoenix | Harry Potter and the Order of the Phoenix | Yates, David                       | David Yates          | tt0373889        |
| 1745293814        | 2005        | 2005        | The Man                                   | Can                                       | Mayfield, Les                      | Mark Dennebaum       | tt1419301        |
| 1746422998        | 1989        | 1989        | Winter People                             | Winter People                             | Kotcheff, Ted                      | Ted Kotcheff         | tt0098659        |
| 1746393097        | 1982        | 1982        | Night Crossing                            | Night Crossing                            | Mann, Delbert                      | Delbert Mann         | tt0082810        |
| 1746410178        | 1985        | 1985        | Certain Fury                              | Certain Fury                              | Gyllenhaal, Stephen                | Stephen Gyllenhaal   | tt0088895        |
| 1746249278        | 1978        | 1978        | Mag Wheels                                | Mag Wheels                                | Buckalew, Bethel                   | Bethel Buckalew      | tt0076781        |
| 1746410853        | 1993        | 1993        | Flesh and Bone                            | Flesh and Bone                            | Kloves, Steve                      | Steve Kloves         | tt0106926        |
| 1746423301        | 1993        | 1992        | Knight Moves                              | Knight Moves                              | Schenkel, Carl                     | Carl Schenkel        | tt0104627        |
| 1745293909        | 2007        | 2007        | Death at a Funeral                        | Death at a Funeral                        | Oz, Frank                          | Frank Oz             | tt0795368        |
| 1746409465        | 1987        | 1987        | Assassination                             | Assassination                             | Hunt, Peter                        | Peter R. Hunt        | tt0092585        |
| 1746218717        | 1971        | 1971        | The Zodiac Killer                         | The Zodiac Killer                         | Hanson, Tom                        | Tom Hanson           | tt0143016        |
| 1745282617        | 2006        | 2006        | In Her Line of Fire                       | In Her Line of Fire                       | Trenchard-Smith, Brian             | Brian Trenchard      | tt0487156        |
| 1745294025        | 2005        | 2005        | The Boys of Baraka                        | The Boys of Baraka                        | Ewing, Heidi ; Grady, Rachel       | Heidi Ewing          | tt0444608        |
| 1746218730        | 1973        | 1973        | The Don Is Dead                           | The Don Is Dead                           | Fleischer, Richard                 | Richard Fleischer    | tt0069989        |
| 1745373061        | 2010        | 2010        | To Age Or Not to Age                      | To Age or Not to Age                      | Pappas, Robert Kane                | Robert Kane Pappas   | tt1690536        |
| 1746563353        | 1952        | 1952        | Island of Desire                          | Island of Desire                          | Heisler, Stuart                    | Stuart Heisler       | tt0044755        |
| 1746434675        | 1997        | 1997        | How I Spent My Summer Vacation            | How I Spent My Summer Vacation            | Fisher, John                       | John Fisher          | tt0131432        |
| 1745341785        | 2002        | 2002        | The Trials of Henry Kissinger             | The Trials of Henry Kissinger             | Jarecki, Eugene                    | Eugene Jarecki       | tt0326306        |

|            |      |      |                                                 |                                             |                                   |                     |           |
|------------|------|------|-------------------------------------------------|---------------------------------------------|-----------------------------------|---------------------|-----------|
| 1746437551 | 2000 | 2000 | Circus                                          | Circus                                      | Walker, Rob                       | Rob Walker          | tt0191037 |
| 1746435890 | 1997 | 1997 | Hugo Pool                                       | Hugo Pool                                   | Downey, Sr., Robert               | Robert Downey Sr.   | tt0119327 |
| 1746211273 | 1974 | 1974 | Hot Summer in Barefoot County                   | Hot Summer in Barefoot County               | Zens, Will                        | Will Zens           | tt0071624 |
| 1746433951 | 1995 | 1995 | Rhinoskin: The Making of a Movie Star           | Rhinoskin: The Making of a Movie Star       | De Pree, Tod; Chapman, Dina Marie | Dina Chapman        | tt0110985 |
| 1746210580 | 1972 | 1972 | The Pied Piper                                  | The Pied Piper                              | Demy, Jacques                     | Jacques Demy        | tt0069086 |
| 1746421344 | 1993 | 1993 | It Was a Wonderful Life                         | It Was a Wonderful Life                     | Ohayon, Michele                   | Michèle Ohayon      | tt0107232 |
| 1746259100 | 1978 | 1978 | Axe                                             | Taxi!!                                      | Friedel, Frederick R.             | Joseph Hardy        | tt0328513 |
| 1746235334 | 1979 | 1979 | More American Graffiti                          | More American Graffiti                      | Norton, B. W. L.                  | Bill Norton         | tt0079576 |
| 1745309625 | 2007 | 2007 | Alice Neel                                      | Alice Neel                                  | Neel, Andrew                      | Andrew Neel         | tt0914358 |
| 1746393960 | 1992 | 1991 | K2                                              | K2                                          | Roddam, Franc                     | Franc Roddam        | tt0102178 |
| 1746421020 | 1988 | 1987 | Crystalstone                                    | Crystalstone                                | Pelaez, Antonio                   | Antonio Peláez      | tt0094927 |
| 1746420533 | 1992 | 1991 | Wax, or the Discovery of Television Among the B | Wax, or the Discovery of Television Among t | Blair, David                      | David Blair         | tt0105791 |
| 1745272195 | 2001 | 2001 | American Outlaws                                | American Outlaws                            | Mayfield, Les                     | Les Mayfield        | tt0244000 |
| 1746410440 | 1984 | 1984 | Mass Appeal                                     | Mass Appeal                                 | Jordan, Glenn                     | Glenn Jordan        | tt0087688 |
| 1746210853 | 1971 | 1971 | \$                                              | \$                                          | Brooks, Richard                   | Richard Brooks      | tt0068152 |
| 1745373926 | 2004 | 2004 | Rick                                            | Trick                                       | Clayton, Curtiss                  | Kobie Kiambu        | tt5208588 |
| 1745372451 | 2011 | 2010 | Lovers of Hate                                  | Lovers of Hate                              | Poyser, Bryan                     | Bryan Poyser        | tt1436560 |
| 1746419363 | 1986 | 1986 | Murphy's Law                                    | Murphy's Law                                | Thompson, J. Lee                  | J. Lee Thompson     | tt0091575 |
| 1746202905 | 1970 | 1970 | The Cheyenne Social Club                        | The Cheyenne Social Club                    | Kelly, Gene                       | Gene Kelly          | tt0065542 |
| 1746219223 | 1972 | 1972 | Cancel My Reservation                           | Cancel My Reservation                       | Bogart, Paul                      | Paul Bogart         | tt0068332 |
| 1746456092 | 1995 | 1995 | Cry, the Beloved Country                        | Cry, the Beloved Country                    | Roodt, Darrell James              | Darrell Roodt       | tt0112749 |
| 1745372886 | 2002 | 2002 | Shanghai Ghetto                                 | Shanghai Ghetto                             | Janklowicz-Mann, Dana ; Mann, Ami | Dana Janklowicz     | tt0318068 |
| 1746409964 | 1989 | 1988 | From Hollywood to Deadwood                      | From Hollywood to Deadwood                  | Pickett, Rex                      | Rex Pickett         | tt0099616 |
| 1746421067 | 1991 | 1991 | The Rapture                                     | The Rapture                                 | Tolkin, Michael                   | Michael Tolkin      | tt0102757 |
| 1746219552 | 1971 | 1971 | The Sporting Club                               | The Sporting Club                           | Peerce, Larry                     | Larry Peerce        | tt0067783 |
| 1746218775 | 1972 | 1972 | The Hot Rock                                    | The Hot Rock                                | Yates, Peter                      | Peter Yates         | tt0068718 |
| 1745342490 | 2002 | 2002 | Don't Ask Don't Tell                            | Don't Ask Don't Tell                        | Miles, Doug                       | Doug Miles          | tt0335057 |
| 1746453697 | 1996 | 1995 | Catwalk                                         | Catwalk                                     | Leacock, Robert                   | Robert Leacock      | tt0112646 |
| 1745302311 | 2005 | 2005 | Sarah Silverman: Jesus is Magic                 | Sarah Silverman: Jesus Is Magic             | Lynch, Liam                       | Liam Lynch          | tt0422528 |
| 1745342523 | 2002 | 2001 | Double Deception                                | Double Deception                            | Okawa, Shundo                     | Shundo Ohkawa       | tt0249511 |
| 1746455446 | 1994 | 1994 | The New Age                                     | The New Age                                 | Tolkin, Michael                   | Michael Tolkin      | tt0110649 |
| 1746394411 | 1985 | 1985 | UFOría                                          | UFOría                                      | Binder, John                      | John Binder         | tt0081674 |
| 1746434015 | 1992 | 1992 | The Giving                                      | The Giving                                  | Demetrios, Eames                  | Eames Demetrios     | tt0101955 |
| 1746257663 | 1977 | 1977 | Youthquake!                                     | Youthquake!                                 | Miller, Max B.                    | Max B. Miller       | tt0163425 |
| 1746250528 | 1980 | 1980 | Rough Cut                                       | Rough Cut                                   | Siegel, Donald                    | Don Siegel          | tt0081439 |
| 1746455502 | 1998 | 1998 | Mark Twain's America in 3-D                     | Mark Twain's America in 3D                  | Low, Stephen                      | Stephen Low         | tt0119621 |
| 1745293302 | 2005 | 2004 | Naked Fame                                      | Naked Fame                                  | Long, Christopher K.              | Christopher Long    | tt0407031 |
| 1746434609 | 1992 | 1991 | Bed & Breakfast                                 | Bed & Breakfast                             | Miller, Robert Ellis              | Robert Ellis Miller | tt0103784 |
| 1745374763 | 2010 | 2009 | Saint John of Las Vegas                         | Saint John of Las Vegas                     | Rhodes, Hue                       | Hue Rhodes          | tt1276105 |
| 1746219214 | 1972 | 1972 | The Visitors                                    | The Visitors                                | Kazan, Elia                       | Elia Kazan          | tt0069466 |
| 1745303076 | 2007 | 2006 | Day Night Day Night                             | Day Night Day Night                         | Loktev, Julia                     | Julia Loktev        | tt0499455 |
| 1745341841 | 2003 | 2003 | My Architect                                    | My Architect                                | Kahn, Nathaniel                   | Nathaniel Kahn      | tt0373175 |
| 1746250561 | 1975 | 1975 | The Fortune                                     | The Fortune                                 | Nichols, Mike                     | Mike Nichols        | tt0073008 |
| 1746410649 | 1989 | 1988 | Manifesto                                       | Manifesto                                   | Makavejev, Dušan                  | Dusan Makavejev     | tt0097826 |
| 1745357713 | 2009 | 2008 | American Violet                                 | American Violet                             | Disney, Tim                       | Tim Disney          | tt1152397 |
| 1745294052 | 2007 | 2006 | Stephanie Daley                                 | Stephanie Daley                             | Brougher, Hilary                  | Hilary Brougher     | tt0483812 |
| 1746410424 | 1992 | 1991 | Under Suspicion                                 | Under Suspicion                             | Moore, Simon                      | Simon Moore         | tt0105691 |
| 1746235303 | 1977 | 1977 | Candlehoe                                       | Candlehoe                                   | Tokar, Norman                     | Norman Tokar        | tt0075807 |
| 1745293878 | 2007 | 2007 | Park                                            | The Mark                                    | Voelker, Kurt                     | Andy Aguilera       | tt1433214 |
| 1746393525 | 1988 | 1988 | Fresh Horses                                    | Fresh Horses                                | Anspaugh, David                   | David Anspaugh      | tt0095178 |
| 1746410668 | 1992 | 1992 | Cousin Bobby                                    | Cousin Bobby                                | Demme, Jonathan                   | Jonathan Demme      | tt0104018 |
| 1746235301 | 1972 | 1972 | Last of the Red Hot Lovers                      | Last of the Red Hot Lovers                  | Saks, Gene                        | Gene Saks           | tt0068835 |
| 1746210127 | 1971 | 1971 | A New Leaf                                      | A New Leaf                                  | May, Elaine                       | Elaine May          | tt0067482 |
| 1746218873 | 1975 | 1975 | Aaron Loves Angela                              | Aaron Loves Angela                          | Parks, Gordon                     | Gordon Parks Jr.    | tt0072596 |
| 1746422016 | 1981 | 1981 | Looker                                          | Looker                                      | Crichton, Michael                 | Michael Crichton    | tt0082677 |
| 1746219021 | 1980 | 1980 | The Competition                                 | The Competition                             | Oliansky, Joel                    | Joel Oliansky       | tt0080556 |
| 1745271955 | 2000 | 1999 | Spring Forward                                  | Spring Forward                              | Gilroy, Tom                       | Tom Gilroy          | tt0156096 |

|                   |             |             |                                             |                                             |                                      |                           |                  |
|-------------------|-------------|-------------|---------------------------------------------|---------------------------------------------|--------------------------------------|---------------------------|------------------|
| 1746209956        | 1970        | 1970        | Cain's Way                                  | Cain's Way                                  | Osborne, Kent                        | Ken Osborne               | tt0066879        |
| 1746235380        | 1971        | 1971        | How to Frame a Figg                         | How to Frame a Figg                         | Rafkin, Alan                         | Alan Rafkin               | tt0067219        |
| 1745373493        | 2008        | 2008        | Chaos Theory                                | Chaos Theory                                | Siega, Marcos                        | Marcos Siega              | tt0460745        |
| 1745341480        | 2008        | 2008        | The Signal                                  | Signals                                     | Bruckner, David; Gentry, Jacob ; Bus | Carlos Etzio Roman        | tt1272492        |
| 1746420537        | 1989        | 1989        | Forbidden City, U. S. A.                    | Forbidden City, U.S.A.                      | Dong, Arthur                         | Arthur Dong               | tt0121292        |
| 1746436231        | 1991        | 1991        | A Time to Die                               | A Time to Die                               | Kanganis, Charles T.                 | Charles T. Kanganis       | tt0103090        |
| 1745359349        | 2011        | 2010        | The Conspirator                             | The Conspirator                             | Redford, Robert                      | Robert Redford            | tt0968264        |
| 1746423292        | 1994        | 1994        | Iron Will                                   | Iron Will                                   | Haid, Charles                        | Charles Haid              | tt0110157        |
| 1746392954        | 1983        | 1983        | In the King of Prussia                      | In the King of Prussia                      | de Antonio, Emile                    | Emile de Antonio          | tt0084130        |
| 1746210649        | 1971        | 1971        | Toklat                                      | Toklat                                      | Davidson, Robert W.                  | Robert W. Davison         | tt0067863        |
| 1745393708        | 2010        | 2010        | The Killer Inside Me                        | The Killer Inside Me                        | Winterbottom, Michael                | Michael Winterbottom      | tt0954947        |
| 1746393309        | 1987        | 1987        | He's My Girl                                | He's My Girl                                | Beaumont, Gabrielle                  | Gabrielle Beaumont        | tt0093160        |
| 1746211228        | 1970        | 1970        | I Love My Wife                              | I Love My Wife                              | Stuart, Mel                          | Mel Stuart                | tt0065871        |
| 1746422244        | 1993        | 1993        | The Meteor Man                              | The Meteor Man                              | Townsend, Robert                     | Robert Townsend           | tt0107563        |
| 1745332533        | 2011        | 2010        | The Sons of Tennessee Williams              | The Sons of Tennessee Williams              | Wolff, Tim                           | Tim Wolff                 | tt1621019        |
| 1745374727        | 2009        | 2009        | Cayman Went                                 | Cayman Went                                 | Sheehan, Bobby                       | Bobby Sheehan             | tt1158933        |
| 1745374591        | 2010        | 2010        | Never Let Me Go                             | Never Let Me Go                             | Romanek, Mark                        | Mark Romanek              | tt1334260        |
| 1745303227        | 2007        | 2007        | Sunshine                                    | Sunshine                                    | Boyle, Danny                         | Danny Boyle               | tt0448134        |
| 1746199961        | 1970        | 1970        | Cry Blood, Apache                           | Cry Blood, Apache                           | Starrett, Jack                       | Jack Starrett             | tt0065596        |
| 1745309188        | 2006        | 2006        | Venus                                       | Venus                                       | Michell, Roger                       | Daniel Maidman            | tt1419710        |
| 1746421237        | 1996        | 1995        | NoHo                                        | NoHo                                        | Schrader, David                      | David Schrader            | tt0113993        |
| 1746219624        | 1971        | 1971        | T. R. Baskin                                | T.R. Baskin                                 | Ross, Herbert                        | Herbert Ross              | tt0067817        |
| 1745341270        | 2004        | 2004        | Stella Street                               | Stella Street                               | Richardson, Peter                    | Peter Richardson          | tt0360025        |
| 1746235075        | 1972        | 1972        | Chato's Land                                | Chato's Land                                | Winner, Michael                      | Michael Winner            | tt0066907        |
| 1746258723        | 1979        | 1979        | Hurricane                                   | Hurricane                                   | Troell, Jan                          | Jan Troell                | tt0079319        |
| 1745282540        | 2006        | 2005        | Neo Ned                                     | Neo Ned                                     | Fischer, Van                         | Van Fischer               | tt0364556        |
| 1746219632        | 1974        | 1974        | The Girl from Petrovka                      | The Girl from Petrovka                      | Miller, Robert Ellis                 | Robert Ellis Miller       | tt0071554        |
| 1745374595        | 2008        | 2008        | Able Danger                                 | Able Danger                                 | Krik, Paul                           | Dave Herman               | tt1056411        |
| 1746410194        | 1984        | 1984        | Hard to Hold                                | Hard to Hold                                | Peerce, Larry                        | Larry Peerce              | tt0087384        |
| 1746423258        | 1990        | 1990        | Lambada                                     | Lambada                                     | Silberg, Joel                        | Joel Silberg              | tt0099969        |
| 1745341847        | 2010        | 2010        | Ramona and Beezus                           | Ramona and Beezus                           | Allen, Elizabeth                     | Elizabeth Allen Rosenbaum | tt0493949        |
| 1745372531        | 2003        | 2003        | The Medallion                               | The Medallion                               | Chan, Gordon                         | Gordon Chan               | tt0288045        |
| 1769971938        | 1970        | 1970        | Friday on My Mind                           | Friday on My Mind                           | Schotten, Wayne                      | Wayne Schotten            | tt0218982        |
| 1746259491        | 1981        | 1981        | ...All the Marbles                          | ...All the Marbles                          | Aldrich, Robert                      | Robert Aldrich            | tt0081964        |
| 1746437135        | 1995        | 1995        | Love & Happiness                            | Love and Happiness                          | Alan, Jordan                         | Jordan Alan               | tt0113709        |
| 1746409980        | 1981        | 1981        | Back Roads                                  | Back Roads                                  | Ritt, Martin                         | Martin Ritt               | tt0082042        |
| 1746435010        | 1990        | 1990        | Crazy People                                | Crazy People                                | Bill, Tony                           | Tony Bill                 | tt0099316        |
| 1746434271        | 1992        | 1992        | Crossing the Bridge                         | Crossing the Bridge                         | Binder, Mike                         | Mike Binder               | tt0104030        |
| 1746210819        | 1973        | 1973        | Tom Sawyer                                  | Tom Sawyer                                  | Taylor, Don                          | James Neilson             | tt0070815        |
| 1746410387        | 1984        | 1984        | Supergirl                                   | Supergirl                                   | Szwarc, Jeannot                      | Jeannot Szwarc            | tt0088206        |
| 1746408694        | 1989        | 1989        | Animal Behavior                             | Animal Behavior                             | Riley, H. Anne; Rasmussen, Kjehl     | Jenny Bowen               | tt0096820        |
| 1746410146        | 1992        | 1992        | Love Crimes                                 | Love Crimes                                 | Borden, Lizzie                       | Lizzie Borden             | tt0102340        |
| 1746410630        | 1986        | 1986        | Eliminators                                 | Eliminators                                 | Manoogian, Peter                     | Peter Manoogian           | tt0091003        |
| 1746248778        | 1974        | 1974        | For Pete's Sake                             | For Pete's Sake                             | Yates, Peter                         | Peter Yates               | tt0071514        |
| 1746202365        | 1970        | 1970        | Captain Milkshake                           | Captain Milkshake                           | Crawford, Richard                    | Richard Crawford          | tt0143164        |
| 1746433892        | 1992        | 1992        | My New Gun                                  | My New Gun                                  | Cochran, Stacy                       | Stacy Cochran             | tt0104954        |
| <b>1746438573</b> | <b>2000</b> | <b>1999</b> | <b>The Basket</b>                           | <b>The Basket</b>                           | <b>Cowan, Rich</b>                   | <b>Rich Cowan</b>         | <b>tt0190255</b> |
| 1745272684        | 2000        | 2001        | The End of the Road                         | The End of the Road                         | Meeske, Brent                        | Brent Meeske              | tt0257606        |
| 1745342627        | 2004        | 2003        | Confessions of a Burning Man                | Confessions of a Burning Man                | Lee, Unsu ; Barnett, Paul            | Paul Barnett              | tt0357567        |
| 1746219548        | 1977        | 1976        | The Gentleman Tramp                         | The Gentleman Tramp                         | Patterson, Richard                   | Richard Patterson         | tt0073039        |
| 1745359704        | 2010        | 2010        | Red White & Blue                            | Red White & Blue                            | Rumley, Simon                        | Simon Rumley              | tt1465505        |
| 1746235258        | 1975        | 1975        | If You Don't Stop It, You'll Go Blind       | If You Don't Stop It... You'll Go Blind!!!  | Levy, Bob; Brasselle, Keefe          | Keefe Brasselle           | tt0144246        |
| 1745309227        | 2005        | 2005        | Down and Derby                              | Down and Derby                              | Hendershot, Eric                     | Eric Hendershot           | tt0398971        |
| 1746419605        | 1994        | 1994        | Stargate                                    | Stargate                                    | Emmerich, Roland                     | Roland Emmerich           | tt0111282        |
| 1746433538        | 1996        | 1997        | Beyond Barbed Wire                          | Beyond Barbed Wire                          | Rosen, Steve                         | Steve Rosen               | tt0118709        |
| 1746409351        | 1989        | 1988        | Lightning Over Braddock: A Rustbowl Fantasy | Lightning Over Braddock: A Rustbowl Fantasy | Buba, Tony                           | Tony Buba                 | tt0097752        |
| 1745342269        | 2010        | 2009        | La Mission                                  | La Mission                                  | Bratt, Peter                         | Peter Bratt               | tt1200272        |

|            |      |      |                                                 |                                               |                                       |                    |           |
|------------|------|------|-------------------------------------------------|-----------------------------------------------|---------------------------------------|--------------------|-----------|
| 1746270878 | 1978 | 1978 | Sextette                                        | Sextette                                      | Hughes, Ken                           | Ken Hughes         | tt0078238 |
| 1746257436 | 1980 | 1979 | Joni                                            | Joni                                          | Collier, James F.                     | James F. Collier   | tt0080966 |
| 1745342842 | 2001 | 2001 | The Gospel According to Philip K. Dick          | The Gospel According to Philip K. Dick        | Steenland, Mark                       | Mark Steenland     | tt0273244 |
| 1746419958 | 1990 | 1990 | The End of Innocence                            | The End of Innocence                          | Cannon, Dyan                          | Dyan Cannon        | tt0101812 |
| 1746422168 | 2000 | 2000 | Love's Labour's Lost                            | Love's Labour's Lost                          | Branagh, Kenneth                      | Kenneth Branagh    | tt0182295 |
| 1746410189 | 1991 | 1990 | The Neverending Story II: The Next Chapter      | The NeverEnding Story II: The Next Chapter    | Miller, George                        | George Miller      | tt0100240 |
| 1745373795 | 2011 | 2010 | Brother's Justice                               | Brother's Justice                             | Palmer, David; Shepard, Dax           | David Palmer       | tt1540803 |
| 1746434373 | 1997 | 1997 | Trial and Error                                 | Trial and Error                               | Lynn, Jonathan                        | Jonathan Lynn      | tt0120373 |
| 1746218801 | 1971 | 1971 | The Other Side of Madness                       | The Other Side of Madness                     | Howard, Frank                         | Frank Howard       | tt0183159 |
| 1746420094 | 1983 | 1983 | Of Unknown Origin                               | Of Unknown Origin                             | Cosmatos, George P.                   | George P. Cosmatos | tt0086036 |
| 1746219238 | 1978 | 1978 | Somebody Killed Her Husband                     | Somebody Killed Her Husband                   | Johnson, Lamont                       | Lamont Johnson     | tt0078294 |
| 1746235513 | 1971 | 1971 | Lawman                                          | Lawman                                        | Winner, Michael                       | Michael Winner     | tt0067333 |
| 1745395356 | 2008 | 2008 | Twilight                                        | Twilight                                      | Hardwicke, Catherine                  | George Kitson      | tt1196708 |
| 1745272699 | 2000 | 1999 | The Tic Code                                    | The Tic Code                                  | Winick, Gary                          | Gary Winick        | tt0165986 |
| 1746419381 | 1986 | 1986 | Private Practices: The Story of a Sex Surrogate | Private Practices: The Story of a Sex Surroga | Dick, Kirby                           | Kirby Dick         | tt0158863 |
| 1745341450 | 2008 | 2007 | Encounters at the End of the World              | Encounters at the End of the World            | Herzog, Werner                        | Werner Herzog      | tt1093824 |
| 1746210464 | 1971 | 1971 | Made for Each Other                             | Made for Each Other                           | Bean, Robert B.                       | Robert B. Bean     | tt0067377 |
| 1746433776 | 1996 | 1996 | Adrenalin: Fear the Rush                        | Adrenalin: Fear the Rush                      | Pyun, Albert                          | Albert Pyun        | tt0115471 |
| 1746210033 | 1970 | 1970 | Fools                                           | Fools                                         | Gries, Tom                            | Tom Gries          | tt0065731 |
| 1746455664 | 1997 | 1997 | Licensed to Kill                                | Licensed to Kill                              | Dong, Arthur                          | Arthur Dong        | tt0119530 |
| 1745302904 | 2005 | 2005 | Angels with Angles                              | Angels with Angles                            | Lane, Scott Edmund                    | Scott Edmund Lane  | tt0179803 |
| 1746250604 | 1977 | 1977 | Hitch Hike to Hell                              | Hitch Hike to Hell                            | Berwick, Irv                          | Irvin Berwick      | tt0140174 |
| 1745341795 | 2008 | 2007 | Anamorph                                        | Anamorph                                      | Miller, H. S.                         | Henry Miller       | tt0497323 |
| 1746210327 | 1971 | 1971 | One More Train to Rob                           | One More Train to Rob                         | McLaglen, Andrew V.                   | Andrew V. McLaglen | tt0067531 |
| 1746422626 | 1997 | 1996 | I Was a Jewish Sex Worker                       | I Was a Jewish Sex Worker                     | Roth, Phillip B.                      | Phillip B. Roth    | tt0116595 |
| 1746250001 | 1980 | 1980 | The Octagon                                     | The Octagon                                   | Karson, Eric                          | Eric Karson        | tt0081259 |
| 1745342231 | 2010 | 2010 | Letters to God                                  | Letters to God                                | Nixon, David                          | David Nixon        | tt1462054 |
| 1746219430 | 1975 | 1975 | The Wrong Damn Film                             | The Wrong Damn Film                           | Davidson, Carson                      | Carson Davidson    | tt0218732 |
| 1746393710 | 1985 | 1985 | The Doctor and the Devils                       | The Doctor and the Devils                     | Francis, Freddie                      | Freddie Francis    | tt0089034 |
| 1746250936 | 1977 | 1976 | Emma Mae                                        | Emma Mae                                      | Fanaka, Jamaa                         | Jamaa Fanaka       | tt0074477 |
| 1769973277 | 1970 | 1970 | Pleasure Plantation                             | Pleasure Plantation                           | Denby, Jerry                          | Jerry Denby        | tt0255485 |
| 1746235459 | 1975 | 1975 | The Meal                                        | The Meal                                      | Hugh, R. John                         | R. John Hugh       | tt0073365 |
| 1745315335 | 2011 | 2010 | Buried Prayers                                  | Buried Prayers                                | Meyer, Steven                         | Steven Meyer       | tt1193623 |
| 1745293962 | 2006 | 2006 | Expiration Date                                 | Expiration Date                               | Stevenson, Rick                       | Rick Stevenson     | tt0443501 |
| 1746454916 | 1999 | 1999 | Walter Rosenblum: In Search of Pitt Street      | Walter Rosenblum: In Search of Pitt Street    | Rosenblum, Nina                       | Nina Rosenblum     | tt0219403 |
| 1746210425 | 1970 | 1970 | Sign of Aquarius                                | Sign of Aquarius                              | Emery, Robert J.                      | Robert J. Emery    | tt0066007 |
| 1745341014 | 2004 | 2004 | The Hunting of the President                    | The Hunting of the President                  | Thomason, Harry; Perry, Nickolas      | Nickolas Perry     | tt0391225 |
| 1746218768 | 1973 | 1973 | Hex                                             | Hex                                           | Garen, Leo                            | Leo Garen          | tt0070174 |
| 1746422994 | 1998 | 1997 | Henry Fool                                      | Henry Fool                                    | Hartley, Hal                          | Hal Hartley        | tt0122529 |
| 1746394662 | 1990 | 1990 | The Natural History of Parking Lots             | The Natural History of Parking Lots           | Lewis, Everett                        | Everett Lewis      | tt0100230 |
| 1746455217 | 1999 | 1999 | Topsy-Turvy                                     | Topsy Turvy                                   | Leigh, Mike                           | Mike Leigh         | tt0151568 |
| 1746453878 | 1995 | 1995 | Beyond Rangoon                                  | Beyond Rangoon                                | Boorman, John                         | John Boorman       | tt0112495 |
| 1745374742 | 2008 | 2007 | Love Comes Lately                               | Love Comes Lately                             | Schütte, Jan                          | Jan Schütte        | tt0787500 |
| 1746420238 | 1993 | 1992 | Another Girl, Another Planet                    | Another Girl Another Planet                   | Almeryda, Michael                     | Michael Almeryda   | tt0103706 |
| 1746210479 | 1971 | 1971 | The Boy Friend                                  | The Boy Friend                                | Russell, Ken                          | Ken Russell        | tt0066858 |
| 1746421579 | 1991 | 1990 | Meet the Applegates                             | Meet the Applegates                           | Lehmann, Michael                      | Michael Lehmann    | tt0100129 |
| 1745282715 | 2006 | 2006 | The Architect                                   | The Architect                                 | Tauber, Matt                          | Matt Tauber        | tt0466665 |
| 1746410531 | 1984 | 1984 | America and Lewis Hine                          | America and Lewis Hine                        | Rosenblum, Nina                       | Nina Rosenblum     | tt0128927 |
| 1745374145 | 2002 | 2002 | CQ                                              | Tc3                                           | Coppola, Roman                        | Bennett Davlin     | tt0441036 |
| 1745309584 | 2007 | 2007 | Itty Bitty Titty Committee                      | Itty Bitty Titty Committee                    | Babbitt, Jamie                        | Jamie Babbitt      | tt0496328 |
| 1746454600 | 1996 | 1996 | Emma                                            | Emma                                          | McGrath, Douglas                      | Diarmuid Lawrence  | tt0118308 |
| 1745373167 | 2002 | 2001 | Amy's Orgasm                                    | Amy's Orgasm                                  | Davis, Julie                          | Julie Davis        | tt0280424 |
| 1745309464 | 2006 | 2005 | Strangers with Candy                            | Strangers with Candy                          | Dinello, Paul                         | Paul Dinello       | tt0369994 |
| 1745357736 | 2001 | 2001 | Go Tigers!                                      | Go Tigers!                                    | Carlson, Kenneth A.                   | Kenneth A. Carlson | tt0270971 |
| 1745340471 | 2004 | 2004 | Open House                                      | Open House                                    | Mirvish, Dan                          | Dan Mirvish        | tt0340883 |
| 1769973301 | 1970 | 1970 | It's Not My Body                                | It's Not My Body                              | Wertheim, Ron                         | Ron Wertheim       | tt0222044 |
| 1746422125 | 1993 | 1992 | Un-Becoming Age                                 | Unbecoming Age                                | Ringel, Alfredo ; Ringel, Deborah Tap | Alfredo Ringel     | tt0105685 |

|            |      |      |                                           |                                           |                                |                      |            |
|------------|------|------|-------------------------------------------|-------------------------------------------|--------------------------------|----------------------|------------|
| 1746409065 | 1990 | 1990 | In the Spirit                             | In the Spirit                             | Seacat, Sandra                 | Sandra Seacat        | tt0099841  |
| 1745293566 | 2007 | 2007 | Quiet City                                | Quiet City                                | Katz, Aaron                    | Aaron Katz           | tt0914382  |
| 1746234761 | 1974 | 1974 | Bootleggers                               | Bootleggers                               | Pierce, Charles B.             | Charles B. Pierce    | tt0071237  |
| 1745359189 | 2002 | 2001 | The Rising Place                          | The Rising Place                          | Rice, Tom                      | Tom Rice             | tt0201020  |
| 1746235786 | 1978 | 1978 | Paradise Alley                            | Paradise Alley                            | Stallone, Sylvester            | Sylvester Stallone   | tt0078056  |
| 1746410362 | 1982 | 1982 | Victor/Victoria                           | Victor Victoria                           | Edwards, Blake                 | Blake Edwards        | tt0084865  |
| 1745293846 | 2006 | 2006 | The King                                  | Sing                                      | Marsh, James                   | John B. Scanlon      | tt1543834  |
| 1745359848 | 2010 | 2009 | Easier with Practice                      | Easier with Practice                      | Alvarez, Kyle Patrick          | Kyle Patrick Alvarez | tt1217426  |
| 1745373916 | 2001 | 2001 | Driven                                    | Drive                                     | Harlin, Renny                  | Rylend Grant         | tt0295937  |
| 1745359195 | 2010 | 2010 | Kalamity                                  | Kalamity                                  | Hausler, James M.              | James M. Hausler     | tt1109594  |
| 1746394234 | 1991 | 1991 | Ted and Venus                             | Ted & Venus                               | Cort, Bud                      | Bud Cort             | tt0103057  |
| 1745359214 | 2003 | 2003 | Controlled Chaos                          | Controlled Chaos                          | Zendel, Azita                  | Azita Zendel         | tt0349238  |
| 1769976700 | 1975 | 1975 | Sharks' Treasure                          | Sharks' Treasure                          | Wilde, Cornel                  | Cornel Wilde         | tt0073695  |
| 1745341781 | 2008 | 2008 | Sex Positive                              | Sex Positive                              | Wein, Daryl                    | Daryl Wein           | tt1183697  |
| 1746393049 | 1985 | 1985 | One Magic Christmas                       | One Magic Christmas                       | Borsos, Phillip                | Phillip Borsos       | tt0089731  |
| 1746408711 | 1992 | 1992 | Falling from Grace                        | Falling from Grace                        | Mellencamp, John               | John Mellencamp      | tt0104225  |
| 1746421319 | 1991 | 1990 | An American Summer                        | An American Summer                        | Slocum, James                  | James Slocum         | tt0101328  |
| 1746409705 | 1983 | 1983 | I Am the Cheese                           | I Am the Cheese                           | Jiras, Robert                  | Robert Jiras         | tt0085706  |
| 1746408496 | 1982 | 1982 | Tempest                                   | Tempest                                   | Mazursky, Paul                 | Paul Mazursky        | tt0084776  |
| 1745293505 | 2007 | 2007 | American Cannibal                         | American Cannibals                        | Grebin, Perry ; Nigro, Michael | Beau Batterson       | tt17574282 |
| 1746419919 | 1983 | 1983 | Porky's II: The Next Day                  | Porky's II: The Next Day                  | Clark, Bob                     | Bob Clark            | tt0086129  |
| 1746454747 | 1998 | 1998 | Dancemaker                                | Dancemaker                                | Diamond, Matthew               | Matthew Diamond      | tt0175550  |
| 1746393096 | 1984 | 1984 | Windy City                                | Windy City                                | Bernstein, Armyan              | Armyan Bernstein     | tt0088405  |
| 1746235271 | 1973 | 1973 | Family Honor                              | Family Honor                              | Worswick, Clark                | Clark Worswick       | tt0178431  |
| 1746218739 | 1972 | 1972 | Squares                                   | Squares                                   | Murphy, Patrick J.             | Patrick J. Murphy    | tt0069305  |
| 1746235573 | 1974 | 1974 | The Savage Is Loose                       | The Savage Is Loose                       | Scott, George C.               | George C. Scott      | tt0072114  |
| 1746219631 | 1974 | 1974 | Where the Lilies Bloom                    | Where the Lilies Bloom                    | Graham, William A.             | William A. Graham    | tt0072401  |
| 1745342942 | 2011 | 2010 | Kat with an I                             | Kati with an I                            | Greene, Robert                 | Robert Greene        | tt1520973  |
| 1746250022 | 1979 | 1979 | The Apple Dumpling Gang Rides Again       | The Apple Dumpling Gang Rides Again       | McEveety, Vincent              | Vincent McEveety     | tt0078790  |
| 1745294054 | 2006 | 2005 | Four Eyed Monsters                        | Four Eyed Monsters                        | Crumley, Arin ; Buice, Susan   | Susan Buice          | tt0439182  |
| 1746256271 | 1975 | 1975 | A Man, a Woman and a Killer               | A Man, a Woman, and a Killer              |                                | Rick Schmidt         | tt0073348  |
| 1746394757 | 1981 | 1981 | On Golden Pond                            | On Golden Pond                            | Rydell, Mark                   | Mark Rydell          | tt0082846  |
| 1746235512 | 1973 | 1973 | The Soul of Nigger Charley                | The Soul of Nigger Charley                | Spangler, Larry G.             | Larry G. Spangler    | tt0070721  |
| 1746409490 | 1988 | 1988 | The Further Adventures of Tennessee Buck  | The Further Adventures of Tennessee Buck  | Keith, David                   | David Keith          | tt0095189  |
| 1746422615 | 1996 | 1996 | Street Corner Justice                     | Street Corner Justice                     | Bail, Chuck                    | Charles Bail         | tt0117761  |
| 1745293663 | 2005 | 2005 | 9/11/03: A Day in the Life of New York    | 9/11/03: A Day in the Life of New York    | Karz, Richard                  | Richard Karz         | tt0478089  |
| 1746393066 | 1988 | 1987 | Five Corners                              | Five Corners                              | Bill, Tony                     | Tony Bill            | tt0093029  |
| 1745396482 | 2009 | 2009 | Passing Strange                           | Passing Strange                           | Lee, Spike                     | Spike Lee            | tt3962302  |
| 1746423003 | 1992 | 1991 | The Linguini Incident                     | The Linguini Incident                     | Shepard, Richard               | Richard Shepard      | tt0102313  |
| 1746408434 | 1987 | 1987 | The Sicilian                              | The Sicilian                              | Cimino, Michael                | Michael Cimino       | tt0093966  |
| 1746409423 | 1981 | 1980 | The Pilot                                 | The Pilot                                 | Robertson, Cliff               | Cliff Robertson      | tt0079719  |
| 1745271677 | 2001 | 2000 | Cage in Box Elder                         | Cage in Box Elder                         | DeLullo, Kevin                 | Kevin DeLullo        | tt0255021  |
| 1746421746 | 1994 | 1994 | Blank Check                               | Blank Check                               | Wainwright, Rupert             | Rupert Wainwright    | tt0109287  |
| 1746410365 | 1987 | 1987 | Summer Camp Nightmare                     | Summer Camp Nightmare                     | Dragin, Bert L.                | Bert L. Dragin       | tt0094070  |
| 1746210639 | 1970 | 1970 | The Cross and the Switchblade             | The Cross and the Switchblade             | Murray, Don                    | Don Murray           | tt0068428  |
| 1746409700 | 1983 | 1983 | Streamers                                 | Streamers                                 | Altman, Robert                 | Robert Altman        | tt0086377  |
| 1769974196 | 1970 | 1970 | The Affairs of Aphrodite                  | The Affairs of Aphrodite                  | Patrick, Alain                 | Alain Patrick        | tt0209899  |
| 1746393647 | 1988 | 1988 | Sweet Hearts Dance                        | Sweet Hearts Dance                        | Greenwald, Robert              | Robert Greenwald     | tt0096200  |
| 1746434645 | 1996 | 1995 | Two Much                                  | Two Much                                  | Trueba, Fernando               | Fernando Trueba      | tt0118001  |
| 1746410888 | 1988 | 1988 | The Rescue                                | The Rescue                                | Fairfax, Ferdinand             | Ferdinand Fairfax    | tt0095981  |
| 1745271967 | 2000 | 2000 | Shadow Hours                              | Shadow Hours                              | Eaton, Isaac H.                | Isaac H. Eaton       | tt0226430  |
| 1746250961 | 1975 | 1974 | Honeybaby, Honeybaby                      | Honeybaby, Honeybaby                      | Schultz, Michael               | Michael Schultz      | tt0150943  |
| 1746393517 | 1988 | 1988 | Imagine: John Lennon                      | Imagine: John Lennon                      | Solt, Andrew                   | Andrew Solt          | tt0095360  |
| 1746410842 | 1991 | 1991 | Rich Girl                                 | Rich Girl                                 | Bender, Joel                   | Joel Bender          | tt0100488  |
| 1746435410 | 1999 | 1999 | In Too Deep                               | In Too Deep                               | Rymer, Michael                 | Michael Rymer        | tt0160401  |
| 1745293713 | 2007 | 2007 | The Condemned                             | The Condemned                             | Wiper, Scott                   | Scott Wiper          | tt0443473  |
| 1745374332 | 2010 | 2009 | The Agony and the Ecstasy of Phil Spector | The Agony and the Ecstasy of Phil Spector | Jayanti, Vikram                | Vikram Jayanti       | tt1518821  |



|            |      |      |                                               |                                               |                                              |                      |           |
|------------|------|------|-----------------------------------------------|-----------------------------------------------|----------------------------------------------|----------------------|-----------|
| 1746260957 | 1978 | 1978 | King of the Gypsies                           | King of the Gypsies                           | Pierson, Frank                               | Frank Pierson        | tt0077807 |
| 1746218831 | 1976 | 1976 | The Long Night                                | The Long Night                                | King, Jr., Woodie                            | Woodie King Jr.      | tt0197634 |
| 1746554436 | 1964 | 1963 | FBI Code 98                                   | FBI Code 98                                   | Martinson, Leslie H.                         | Leslie H. Martinson  | tt0058077 |
| 1745339948 | 2002 | 2002 | Power and Terror: Noam Chomsky in Our Times   | Power and Terror: Noam Chomsky in Our Times   | Junkerman, John                              | John Junkerman       | tt0338357 |
| 1746420974 | 1993 | 1993 | Ethan Frome                                   | Ethan Frome                                   | Madden, John                                 | John Madden          | tt0106833 |
| 1746421665 | 1997 | 1996 | Good Luck                                     | Good Luck                                     | LaBrie, Richard                              | Richard LaBrie       | tt0116439 |
| 1746420876 | 1990 | 1990 | The Return of Superfly                        | The Return of Superfly                        | Shore, Sig; Shore, Sig                       | Sig Shore            | tt0100480 |
| 1746408637 | 1988 | 1988 | Da                                            | Da                                            | Clark, Matt                                  | Matt Clark           | tt0094934 |
| 1746409926 | 1992 | 1992 | Split Second                                  | Split Second                                  | Maylam, Tony                                 | Tony Maylam          | tt0105459 |
| 1745342799 | 2001 | 2001 | The Pledge                                    | The Pledge                                    | Penn, Sean                                   | Jennifer Whitaker    | tt4128600 |
| 1746219661 | 1972 | 1972 | Black Girl                                    | Black Girl                                    | Davis, Ossie                                 | Ossie Davis          | tt0068280 |
| 1745373072 | 2010 | 2010 | Dreamkiller                                   | Dreamkiller                                   | Pirotta, Catherine                           | Catherine C. Pirotta | tt0818098 |
| 1745372355 | 2001 | 2000 | Auggie Rose                                   | Auggie Rose                                   | Tabak, Matthew                               | Matthew Tabak        | tt0219519 |
| 1745340038 | 2004 | 2004 | Howard Zinn: You Can't Be Neutral on a Moving | Howard Zinn: You Can't Be Neutral on a Moving | Ellis, Deb ; Mueller, Denis                  | Deb Ellis            | tt0416825 |
| 1745302920 | 2005 | 2005 | State Property 2                              | State Property 2                              | Dash, Damon                                  | Damon Dash           | tt0403537 |
| 1745293369 | 2007 | 2007 | Hannibal Rising                               | Hannibal Rising                               | Webber, Peter                                | Peter Webber         | tt0367959 |
| 1745293994 | 2005 | 2005 | Meet the Family                               | Meet the Family                               | Lerner, Stan                                 | Stan Lerner          | tt0473060 |
| 1746423464 | 1993 | 1993 | Robin Hood: Men in Tights                     | Robin Hood: Men in Tights                     | Brooks, Mel                                  | Mel Brooks           | tt0107977 |
| 1745303091 | 2007 | 2006 | Notes on Marie Menken                         | Notes on Marie Menken                         | Kudlacek, Martina                            | Martina Kudláček     | tt0927629 |
| 1746409266 | 1988 | 1988 | Clean and Sober                               | Clean and Sober                               | Caron, Glenn Gordon                          | Glenn Gordon Caron   | tt0094884 |
| 1745309647 | 2005 | 2005 | The War Within                                | The War Within                                | Castelo, Joseph                              | Joseph Castelo       | tt0414344 |
| 1745342475 | 2010 | 2009 | The Afterlight                                | The Afterlight                                | Kaleina, Alexei; Macneill, Craig             | Alexei Kaleina       | tt0999963 |
| 1746423299 | 1995 | 1995 | The Babysitter                                | The Babysitter                                | Ferland, Guy                                 | Guy Ferland          | tt0112438 |
| 1745272667 | 2000 | 1999 | Treasure Island                               | Treasure Island                               | King, Scott                                  | Scott King           | tt0181868 |
| 1745293295 | 2007 | 2006 | A Broken Sole                                 | A Broken Sole                                 | Marsellis, Antony                            | Antony Marsellis     | tt0467111 |
| 1746209915 | 1970 | 1970 | The Only Game in Town                         | The Only Game in Town                         | Stevens, George                              | George Stevens       | tt0066184 |
| 1745394596 | 2008 | 2008 | Leatherheads                                  | Leatherheads                                  | Clooney, George                              | George Clooney       | tt0379865 |
| 1745373421 | 2010 | 2009 | Daybreakers                                   | Daybreakers                                   | Spierig, Michael; Spierig, Peter             | Michael Spierig      | tt0433362 |
| 1746219013 | 1971 | 1971 | The Light at the Edge of the World            | The Light at the Edge of the World            | Billington, Kevin                            | Kevin Billington     | tt0067345 |
| 1745395605 | 2010 | 2009 | The Perfect Game                              | The Perfect Game                              | Dear, William                                | William Dear         | tt0473102 |
| 1746210808 | 1973 | 1973 | The All-American Boy                          | The All American Boy                          | Eastman, Charles                             | Charles Eastman      | tt0069689 |
| 1746455122 | 1996 | 1996 | Carried Away                                  | Carried Away                                  | Barreto, Bruno                               | Bruno Barreto        | tt0115837 |
| 1746235007 | 1974 | 1974 | The Bears and I                               | The Bears and I                               | McEveety, Bernard                            | Bernard McEveety     | tt0071199 |
| 1746409091 | 1988 | 1988 | Dead Ringers                                  | Dead Ringers                                  | Cronenberg, David                            | David Cronenberg     | tt0094964 |
| 1745342654 | 2010 | 2010 | Chasing 3000                                  | Chasing 3000                                  | Lanese, Gregory J.                           | Gregory J. Lanese    | tt0483586 |
| 1746393985 | 1992 | 1992 | Bob Roberts                                   | Bob Roberts                                   | Robbins, Tim                                 | Tim Robbins          | tt0103850 |
| 1769973187 | 1970 | 1970 | Dionysus in '69                               | Dionysus in '69                               | De Palma, Brian; Fiore, Robert; Rubin, Brian | Brian De Palma       | tt0065641 |
| 1746257498 | 1975 | 1974 | Nana, Mom and Me                              | Nana, Mom and Me                              | Rothschild, Amalie R.                        | Amalie R. Rothschild | tt0253284 |
| 1746409261 | 1987 | 1987 | Happy New Year                                | Happy New Year                                | Avildsen, John G.                            | John G. Avildsen     | tt0093145 |
| 1745303157 | 2007 | 2006 | El Cantante                                   | El cantante                                   | Ichaso, Leon                                 | Leon Ichaso          | tt0458522 |
| 1746422087 | 1995 | 1995 | New Jersey Drive                              | New Jersey Drive                              | Gomez, Nick                                  | Nick Gomez           | tt0113967 |
| 1746410690 | 1993 | 1992 | Inside Monkey Zetterland                      | Inside Monkey Zetterland                      | Levy, Jefery                                 | Jefery Levy          | tt0107220 |
| 1746234994 | 1974 | 1974 | Abby                                          | Abby                                          | Girdler, William                             | William Girdler      | tt0071095 |
| 1745293676 | 2005 | 2005 | Loudmouth Soup                                | Loudmouth Soup                                | Watstein, Adam                               | Adam Watstein        | tt0475328 |
| 1746409999 | 1989 | 1988 | Scandal                                       | Scandals                                      | Caton-Jones, Michael                         | Glenn Kirschbaum     | tt0310116 |
| 1746218799 | 1972 | 1972 | Z.P.G.                                        | Z.P.G.                                        | Campus, Michael                              | Michael Campus       | tt0069530 |
| 1745302632 | 2007 | 2007 | December Boys                                 | December Boys                                 | Hardy, Rod                                   | Rod Hardy            | tt0465436 |
| 1746408705 | 1981 | 1981 | The Great Muppet Caper                        | The Great Muppet Caper                        | Henson, Jim                                  | Jim Henson           | tt0082474 |
| 1745293180 | 2004 | 2003 | Inescapable                                   | Inescapable                                   | Lesnick, Helen                               | Helen Lesnick        | tt0439628 |
| 1745372677 | 2003 | 2004 | Mad Song                                      | Mad Song                                      | Roy, David                                   | David Roy            | tt0244634 |
| 1746421966 | 1995 | 1995 | Rob Roy                                       | Rob Roy                                       | Caton-Jones, Michael                         | Michael Caton        | tt0114287 |
| 1746410186 | 1990 | 1990 | Circuitry Man                                 | Circuitry Man                                 | Lovy, Steven                                 | Steven Lovy          | tt0099271 |
| 1746410902 | 1987 | 1986 | Lily Tomlin                                   | Lily Tomlin                                   | Broomfield, Nicholas; Churchill, Joa         | Nick Broomfield      | tt0091414 |
| 1745374978 | 2010 | 2010 | Violet Tendencies                             | Violet Tendencies                             | Andreas, Casper                              | Casper Andreas       | tt1407055 |
| 1746393487 | 1983 | 1983 | The Pirates of Penzance                       | The Pirates of Penzance                       | Leach, Wilford                               | Wilford Leach        | tt0086112 |
| 1746408885 | 1992 | 1992 | Center of the Web                             | Center of the Web                             | Prior, David A.                              | David A. Prior       | tt0103933 |
| 1746219613 | 1976 | 1976 | Death Riders                                  | Death Riders                                  | Wilson, James                                | Jim Wilson           | tt0135363 |

|                   |             |             |                                                         |                                                       |                                         |                     |                  |
|-------------------|-------------|-------------|---------------------------------------------------------|-------------------------------------------------------|-----------------------------------------|---------------------|------------------|
| 1745342840        | 2008        | 2008        | Proud American                                          | Proud American                                        | Ashman, Fred                            | Fred Ashman         | tt1008023        |
| 1746392650        | 1981        | 1981        | Cattle Annie and Little Britches                        | Cattle Annie and Little Britches                      | Johnson, Lamont                         | Lamont Johnson      | tt0082145        |
| 1746422533        | 1989        | 1989        | Hell High                                               | Hell High                                             | Grossman, Douglas                       | Douglas Grossman    | tt0091192        |
| 1746410752        | 1988        | 1988        | Salome's Last Dance                                     | Salome's Last Dance                                   | Russell, Ken                            | Ken Russell         | tt0096029        |
| 1746219237        | 1973        | 1973        | Brother on the Run!                                     | Brother on the Run                                    | Strock, Herbert L.                      | Edward J. Lakso     | tt0068319        |
| 1746408462        | 1990        | 1990        | Touch of a Stranger                                     | Touch of a Stranger                                   | Gilbert, Brad M.                        | Brad M. Gilbert     | tt0103109        |
| 1746210307        | 1970        | 1970        | R. P. M.                                                | R.P.M.                                                | Kramer, Stanley                         | Stanley Kramer      | tt0066273        |
| 1745342710        | 2008        | 2008        | Dark Streets                                            | Dark Streets                                          | Samuels, Rachel                         | Rachel Samuels      | tt0772165        |
| 1746235300        | 1977        | 1977        | First Love                                              | First Love                                            | Darling, Joan                           | Joan Darling        | tt0076033        |
| 1746435351        | 1998        | 1997        | All the Rage                                            | All the Rage                                          | Tec, Roland                             | Roland Tec          | tt0118590        |
| 1746219211        | 1975        | 1976        | Mean Johnny Barrows                                     | Mean Johnny Barrows                                   | Williamson, Fred                        | Fred Williamson     | tt0074885        |
| 1746235207        | 1973        | 1972        | Black Jack                                              | Black Jack                                            | Naud, William T.                        | William T. Naud     | tt0064372        |
| 1745393824        | 2011        | 2010        | Vacation!                                               | The Vacation                                          | Clark, Zach                             | Mark Witte          | tt1965229        |
| 1746270142        | 1980        | 1980        | Just Tell Me What You Want                              | Just Tell Me What You Want                            | Lumet, Sidney                           | Sidney Lumet        | tt0080975        |
| 1745302927        | 2007        | 2007        | And Then Came Love                                      | And Then Came Love                                    | Schenkman, Richard                      | Richard Schenkman   | tt0825346        |
| 1746235291        | 1978        | 1977        | Capricorn One                                           | Capricorn One                                         | Hyams, Peter                            | Peter Hyams         | tt0077294        |
| 1746419788        | 1990        | 1990        | Full Fathom Five                                        | Full Fathom Five                                      | Franklin, Carl                          | Carl Franklin       | tt0099622        |
| 1746439767        | 1998        | 1998        | Homegrown                                               | Homegrown                                             | Gyllenhaal, Stephen                     | Stephen Gyllenhaal  | tt0119305        |
| 1745272351        | 2000        | 2000        | Steal This Movie                                        | Steal This Movie                                      | Greenwald, Robert                       | Robert Greenwald    | tt0161216        |
| 1746410807        | 1988        | 1988        | The Unholy                                              | The Unholy                                            | Vila, Camilo                            | Camilo Vila         | tt0096340        |
| 1745340809        | 2002        | 2001        | World Traveler                                          | World Traveler                                        | Freundlich, Bart                        | Bart Freundlich     | tt0262911        |
| 1745359396        | 2002        | 2002        | Hometown Legend                                         | Hometown Legend                                       | Anderson, James                         | James Anderson      | tt0260695        |
| 1745396214        | 2010        | 2010        | The Dry Land                                            | The Dry Land                                          | Williams, Ryan Piers                    | Ryan Piers Williams | tt1322264        |
| 1746211234        | 1974        | 1974        | The White Dawn                                          | The White Dawn                                        | Kaufman, Philip                         | Philip Kaufman      | tt0072403        |
| 1745342059        | 2010        | 2009        | Shutterbug                                              | Shutterbug                                            | Papas, Minos                            | Minos Papas         | tt0984227        |
| 1745342779        | 2011        | 2010        | Breaking and Entering                                   | Breaking and Entering                                 | Fingerhut, Benjamin                     | Benjamin Fingerhut  | tt1582383        |
| 1746219189        | 1973        | 1973        | Class of '44                                            | Class of '44                                          | Bogart, Paul                            | Paul Bogart         | tt0069888        |
| 1745372872        | 2008        | 2008        | The Dhamma Brothers                                     | The Dhamma Brothers                                   | Phillips, Jenny ; Stein, Anne Marie ; K | Andrew Kukura       | tt1212007        |
| 1745372697        | 2002        | 2002        | Trapped                                                 | Trapped                                               | Mandoki, Luis                           | Stephanie Wynne     | tt5277044        |
| 1746210500        | 1971        | 1970        | A Man Called Sledge                                     | A Man Called Sledge                                   | Morrow, Vic                             | Vic Morrow          | tt0066050        |
| 1746249390        | 1978        | 1978        | Legacy of Blood                                         | Legacy of Blood                                       | Milligan, Andy                          | Andy Milligan       | tt0077844        |
| 1746422139        | 1994        | 1994        | Countdown to Freedom: 10 Days That Changed              | Countdown to Freedom: 10 Days That Chan               | Schechter, Danny                        | Danny Schechter     | tt0134594        |
| 1746434332        | 1995        | 1995        | Destiny Turns on the Radio                              | Destiny Turns on the Radio                            | Baran, Jack                             | Jack Baran          | tt0112854        |
| 1746248830        | 1973        | 1973        | The Wednesday Children                                  | The Wednesday Children                                | West, Robert D.                         | Robert D. West      | tt3614944        |
| 1746393548        | 1988        | 1988        | Satisfaction                                            | Satisfaction                                          | Freeman, Joan                           | Joan Freeman        | tt0096037        |
| 1746455068        | 1997        | 1997        | A Healing                                               | A Healing                                             | Stevens, Connie                         | Connie Stevens      | tt0131418        |
| 1746211226        | 1972        | 1972        | Stand Up and Be Counted                                 | Stand Up and Be Counted                               | Cooper, Jackie                          | Jackie Cooper       | tt0069307        |
| 1746420086        | 1993        | 1993        | Virtual Love                                            | Virtual Love                                          | Hershman, Lynn                          | Lynn Hershman       | tt0108497        |
| 1746433928        | 1990        | 1990        | The Handmaid's Tale                                     | The Handmaid's Tale                                   | Schlöndorff, Volker                     | Volker Schlöndorff  | tt0099731        |
| 1745372390        | 2010        | 2010        | The Fighter                                             | The Fighter                                           | Russell, David O.                       | David O. Russell    | tt0964517        |
| 1746260154        | 1980        | 1980        | On the Nickel                                           | On the Nickel                                         | Waite, Ralph                            | Ralph Waite         | tt0081277        |
| 1746257698        | 1979        | 1979        | Hometown U.S.A.                                         | Hometown U.S.A.                                       | Baer, Max                               | Max Baer Jr.        | tt0079304        |
| 1746434683        | 1990        | 1990        | Bail Jumper                                             | Bail Jumper                                           | Faber, Christian                        | Christian Faber     | tt0099095        |
| 1745293704        | 2007        | 2006        | Raising Flagg                                           | Raising Flagg                                         | Miller, Neal                            | Neal Miller         | tt0302498        |
| 1746408651        | 1987        | 1986        | Rawhead Rex                                             | Rawhead Rex                                           | Pavlou, George                          | George Pavlou       | tt0091829        |
| 1746453961        | 1999        | 1999        | American Hollow                                         | American Hollow                                       | Kennedy, Rory                           | Rory Kennedy        | tt0181287        |
| 1745360009        | 2004        | 2003        | Fish Without a Bicycle                                  | Fish Without a Bicycle                                | Green, Brian Austin                     | Brian Austin Green  | tt0366517        |
| 1746420130        | 1988        | 1988        | Pass the Ammo                                           | Pass the Ammo                                         | Beaird, David                           | David Beaird        | tt0095832        |
| 1746420247        | 1989        | 1989        | The Rosegarden                                          | The Rose Garden                                       | Rademakers, Fons                        | Fons Rademakers     | tt0098225        |
| 1746219030        | 1972        | 1972        | Angela Davis: Portrait of a Revolutionary               | Angela Davis: Portrait of a Revolutionary             | du Luart, Yolande                       | Yolande DuLuart     | tt0295167        |
| 1745293752        | 2004        | 2004        | Woman Thou Art Loosed                                   | Woman Thou Art Loosed                                 | Schultz, Michael                        | Michael Schultz     | tt0399901        |
| 1746439773        | 1999        | 1999        | Onegin                                                  | Onegin                                                | Fiennes, Martha                         | Martha Fiennes      | tt0119079        |
| 1745359846        | 2009        | 2009        | Whiteout                                                | Whiteout                                              | Sena, Dominic                           | Dominic Sena        | tt0365929        |
| 1746410857        | 1994        | 1994        | Floundering                                             | Floundering                                           | McCarthy, Peter                         | Peter McCarthy      | tt0109816        |
| 1746422644        | 1993        | 1993        | In the Name of the Father                               | In the Name of the Father                             | Sheridan, Jim                           | Jim Sheridan        | tt0107207        |
| <b>1745340112</b> | <b>2004</b> | <b>2004</b> | <b>Hijacking Catastrophe: 9/11, Fear and the Sellin</b> | <b>Hijacking Catastrophe: 9/11, Fear &amp; the Se</b> | <b>Earp, Jeremy ; Jhally, Sut</b>       | <b>Jeremy Earp</b>  | <b>tt0419806</b> |
| 1746454260        | 1995        | 1995        | Stuart Saves His Family                                 | Stuart Saves His Family                               | Ramis, Harold                           | Harold Ramis        | tt0114571        |

|            |      |      |                                     |                                     |                                |                     |           |
|------------|------|------|-------------------------------------|-------------------------------------|--------------------------------|---------------------|-----------|
| 1745359240 | 2002 | 2001 | Snipes                              | Snipes                              | Murray, Rich                   | Rich Murray         | tt0275688 |
| 1745309398 | 2007 | 2007 | Quantum Hoops                       | Quantum Hoops                       | Greenwald, Rick                | Rick Greenwald      | tt1135944 |
| 1769974235 | 1970 | 1971 | Gigi Goes to Pot                    | Gigi Goes to Pot                    | Catah, Sam S.                  | Sam S. Catah        | tt0219039 |
| 1746270995 | 1979 | 1979 | Goldengirl                          | Goldengirl                          | Sargent, Joseph                | Joseph Sargent      | tt0079225 |
| 1746421624 | 1994 | 1994 | The Beans of Egypt, Maine           | The Beans of Egypt, Maine           | Warren, Jennifer               | Jennifer Warren     | tt0109226 |
| 1746272922 | 1978 | 1978 | The Cat from Outer Space            | The Cat from Outer Space            | Tokar, Norman                  | Norman Tokar        | tt0077305 |
| 1745302451 | 2007 | 2007 | Lucky You                           | Lucky You                           | Hanson, Curtis                 | Curtis Hanson       | tt0338216 |
| 1746438517 | 1997 | 1997 | Bliss                               | Bliss                               | Young, Lance                   | Lance Young         | tt0118742 |
| 1746210939 | 1972 | 1972 | A.W.O.L.                            | A.W.O.L.                            | Freed, Herb                    | Herb Freed          | tt0068163 |
| 1769973263 | 1970 | 1970 | Barbara                             | Barbara                             | Burns, Walter                  | Walter Burns        | tt0211216 |
| 1745272494 | 2000 | 2000 | Once in the Life                    | Once in the Life                    | Fishburne, Laurence            | Laurence Fishburne  | tt0177068 |
| 1746420245 | 1990 | 1990 | Body Chemistry                      | Body Chemistry                      | Peterson, Kristine             | Kristine Peterson   | tt0099164 |
| 1746409712 | 1990 | 1990 | The White Girl                      | The White Girl                      | Brown, Tony                    | Tony Brown          | tt0100927 |
| 1746250150 | 1976 | 1976 | Vigilante Force                     | Vigilante Force                     | Armitage, George               | George Armitage     | tt0075393 |
| 1746211108 | 1971 | 1971 | Who Says I Can't Ride a Rainbow!    | Who Says I Can't Ride a Rainbow!    | Mann, Edward                   | Edward Mann         | tt0067982 |
| 1746218720 | 1972 | 1972 | Limbo                               | Limbo                               | Robson, Mark                   | Mark Robson         | tt0068860 |
| 1746208433 | 1970 | 1970 | Ice                                 | Ice                                 | Kramer, Robert                 | Robert Kramer       | tt0064465 |
| 1746423365 | 2000 | 2000 | Cecil B. DeMented                   | Cecil B. DeMented                   | Waters, John                   | John Waters         | tt0173716 |
| 1746419606 | 1991 | 1991 | The Unborn                          | The Unborn                          | Flender, Rodman                | Rodman Flender      | tt0103157 |
| 1746419153 | 1992 | 1991 | Night on Earth                      | Night on Earth                      | Jarmusch, Jim                  | Jim Jarmusch        | tt0102536 |
| 1745282779 | 2006 | 2006 | By the People                       | By the People                       | Fickle, Malindi                | Malindi Fickle      | tt0860898 |
| 1746382365 | 1981 | 1981 | Savage Harvest                      | Savage Harvest                      | Collins, Robert                | Robert L. Collins   | tt0083034 |
| 1745293790 | 2006 | 2006 | The Bridge                          | The Bridge                          | Steel, Eric                    | Richard Todd Aguayo | tt0948112 |
| 1746273980 | 1978 | 1978 | One Man Jury                        | The One Man Jury                    | Martin, Charles                | Charles Martin      | tt0078032 |
| 1746274532 | 1979 | 1979 | The Frisco Kid                      | The Frisco Kid                      | Aldrich, Robert                | Robert Aldrich      | tt0079180 |
| 1746235791 | 1976 | 1976 | Salsa                               | Salsa                               | Masucci, Jerry; Gast, Leon     | Leon Gast           | tt0159721 |
| 1745359492 | 2001 | 2001 | Stockpile                           | Stockpile                           | Trombley, Stephen              | Stephen Trombley    | tt0292703 |
| 1746421339 | 1993 | 1993 | Super Mario Bros.                   | Super Mario Bros.                   | Morton, Rocky; Jankel, Annabel | Annabel Jankel      | tt0108255 |
| 1746235239 | 1978 | 1978 | House Calls                         | House Calls                         | Zieff, Howard                  | Howard Zieff        | tt0077699 |
| 1746453745 | 1995 | 1995 | Ballet                              | Ballet                              | Wiseman, Frederick             | Frederick Wiseman   | tt0209928 |
| 1746211049 | 1972 | 1972 | Grave of the Vampire                | Grave of the Vampire                | Hayes, John                    | John Hayes          | tt0068658 |
| 1746394481 | 1989 | 1989 | Triumph of the Spirit               | Triumph of the Spirit               | Young, Robert M.               | Robert M. Young     | tt0098513 |
| 1745394539 | 2009 | 2009 | Amelia                              | Amelia                              | Nair, Mira                     | Mira Nair           | tt1129445 |
| 1746210818 | 1972 | 1971 | Death by Invitation                 | Death by Invitation                 | Friedman, Ken                  | Ken Friedman        | tt0215704 |
| 1746235392 | 1971 | 1971 | The Hunting Party                   | The Hunting Party                   | Medford, Don                   | Don Medford         | tt0067224 |
| 1746437138 | 1994 | 1994 | Mixed Nuts                          | Mixed Nuts                          | Ephron, Nora                   | Nora Ephron         | tt0110538 |
| 1746219198 | 1975 | 1975 | One of Our Dinosaurs Is Missing     | One of Our Dinosaurs Is Missing     | Stevenson, Robert              | Robert Stevenson    | tt0075016 |
| 1746409085 | 1987 | 1987 | Best Seller                         | Best Seller                         | Flynn, John                    | John Flynn          | tt0092641 |
| 1745293416 | 2004 | 2004 | From Other Worlds                   | From Other Worlds                   | Strugatz, Barry                | Barry Strugatz      | tt0363623 |
| 1746434321 | 1992 | 1991 | Diary of a Hitman                   | Diary of a Hitman                   | London, Roy                    | Roy London          | tt0101725 |
| 1746210474 | 1971 | 1971 | The Marriage of a Young Stockbroker | The Marriage of a Young Stockbroker | Turman, Lawrence               | Lawrence Turman     | tt0067398 |
| 1746419943 | 1986 | 1985 | Hard Choices                        | Hard Choices                        | King, Rick                     | Rick King           | tt0091170 |
| 1745272862 | 2000 | 2000 | Thomas and the Magic Railroad       | Thomas and the Magic Railroad       | Allcroft, Britt                | Britt Allcroft      | tt0205461 |
| 1746392753 | 1985 | 1985 | Kiss of the Spider Woman            | Kiss of the Spider Woman            | Babenco, Hector                | Hector Babenco      | tt0089424 |
| 1746218267 | 1968 | 1967 | A Stravinsky Portrait               | A Stravinsky Portrait               |                                | Richard Leacock     | tt0268660 |
| 1746436274 | 1992 | 1992 | 1492: Conquest of Paradise          | 1492: Conquest of Paradise          | Scott, Ridley                  | Ridley Scott        | tt0103594 |
| 1746202572 | 1970 | 1970 | The Good, the Bad and the Beautiful | The Good, the Bad and the Beautiful | Canton, Robert                 | Robert Canton       | tt0192081 |
| 1745294031 | 2007 | 2007 | Good Luck Chuck                     | Good Luck Chuck                     | Helfrich, Mark                 | Mark Helfrich       | tt0452625 |
| 1746203116 | 1970 | 1970 | The Revolutionary                   | The Revolutionary                   | Williams, Paul                 | Paul Williams       | tt0066296 |
| 1746422641 | 1998 | 1998 | The Jew in the Lotus                | The Jew in the Lotus                | Chiten, Laurel                 | Laurel Chiten       | tt0145007 |
| 1745272441 | 2000 | 2000 | The Opportunists                    | The Opportunists                    | Connell, Myles                 | Myles Connell       | tt0138681 |
| 1746410761 | 1991 | 1991 | The Taking of Beverly Hills         | The Taking of Beverly Hills         | Furie, Sidney J.               | Sidney J. Furie     | tt0105526 |
| 1746409813 | 1988 | 1988 | In a Shallow Grave                  | In a Shallow Grave                  | Bowser, Kenneth                | Kenneth Bowser      | tt0095364 |
| 1745303070 | 2007 | 2007 | Honeydripper                        | Honeydripper                        | Sayles, John                   | John Sayles         | tt0829193 |
| 1746409480 | 1991 | 1991 | Straight Out of Brooklyn            | Straight Out of Brooklyn            | Rich, Matty                    | Matty Rich          | tt0102989 |
| 1746235520 | 1980 | 1980 | Coast to Coast                      | Coast to Coast                      | Sargent, Joseph                | Joseph Sargent      | tt0080550 |
| 1746235536 | 1973 | 1973 | Howzer                              | Howzer                              | Laurence, Ken                  | Ken Lubner          | tt0201672 |

|            |      |      |                                               |                                           |                                  |                           |           |
|------------|------|------|-----------------------------------------------|-------------------------------------------|----------------------------------|---------------------------|-----------|
| 1746235194 | 1973 | 1973 | Hit!                                          | Hit!                                      | Furie, Sidney J.                 | Sidney J. Furie           | tt0070183 |
| 1746421062 | 1987 | 1986 | Inside Out                                    | Inside Out                                | Taicher, Robert                  | Robert Taicher            | tt0091268 |
| 1746422910 | 1995 | 1995 | Showgirls                                     | Showgirls                                 | Verhoeven, Paul                  | Paul Verhoeven            | tt0114436 |
| 1746419399 | 1990 | 1990 | Twisted Justice                               | Twisted Justice                           | Heavener, David                  | David Heavener            | tt0100826 |
| 1746440063 | 1999 | 1998 | The Broken Giant                              | The Broken Giant                          | Nagy, Estep                      | Estep Nagy                | tt0140866 |
| 1746201489 | 1970 | 1970 | Flesh Feast                                   | Flesh Feast                               | Grinter, Brad F.                 | Brad F. Grinter           | tt0065727 |
| 1746455650 | 1995 | 1995 | Young at Hearts                               | Young at Heart                            | Campbell, Don                    | Allan Arkush              | tt0115034 |
| 1746394737 | 1990 | 1990 | Corporate Affairs                             | Corporate Affairs                         | Winkless, Terence H.             | Terence H. Winkless       | tt0099305 |
| 1746393541 | 1983 | 1983 | Touched                                       | Touched                                   | Flynn, John                      | John Flynn                | tt0086460 |
| 1745393709 | 2009 | 2009 | Steam                                         | Steam                                     | Schickner, Kyle                  | Eldar Rapaport            | tt1403246 |
| 1746409252 | 1986 | 1986 | The Delta Force                               | The Delta Force                           | Golan, Menahem                   | Menahem Golan             | tt0090927 |
| 1746210796 | 1970 | 1970 | The Adventurers                               | The Adventurers                           | Gilbert, Lewis                   | Lewis Gilbert             | tt0065374 |
| 1746433948 | 1989 | 1988 | Heart of Midnight                             | Heart of Midnight                         | Chapman, Matthew                 | Matthew Chapman           | tt0095286 |
| 1745375116 | 2010 | 2009 | Guy and Madeline on a Park Bench              | Guy and Madeline on a Park Bench          | Chazelle, Damien                 | Damien Chazelle           | tt1337193 |
| 1746235274 | 1976 | 1976 | Burnt Offerings                               | Burnt Offerings                           | Curtis, Dan                      | Dan Curtis                | tt0074258 |
| 1745393819 | 2010 | 2009 | Wonderful World                               | Wonderful World                           | Goldin, Josh                     | Joshua Goldin             | tt0857275 |
| 1746420892 | 1993 | 1993 | The Bed You Sleep In                          | The Bed You Sleep In                      | Jost, Jon                        | Jon Jost                  | tt0106372 |
| 1746235221 | 1973 | 1973 | Ash Wednesday                                 | Ash Wednesday                             | Peerce, Larry                    | Larry Peerce              | tt0069736 |
| 1746218737 | 1973 | 1973 | Gordon's War                                  | Gordon's War                              | Davis, Ossie                     | Ossie Davis               | tt0070124 |
| 1745309232 | 2005 | 2004 | Slutty Summer                                 | Slutty Summer                             | Andreas, Casper                  | Casper Andreas            | tt0411883 |
| 1745293813 | 2007 | 2007 | Once                                          | One                                       | Carney, John                     | Christopher Potter        | tt1035481 |
| 1746257748 | 1977 | 1977 | Sidewinder 1                                  | Sidewinder 1                              | Bellamy, Earl                    | Earl Bellamy              | tt0076710 |
| 1745340467 | 2004 | 2004 | Faster                                        | The Toaster                               | Neale, Mark                      | Javier Bonafont           | tt0487129 |
| 1746436186 | 1999 | 1999 | Cremaster 2                                   | Cremaster 2                               | Barney, Matthew                  | Matthew Barney            | tt0214605 |
| 1746410192 | 1983 | 1983 | Never Say Never Again                         | Never Say Never Again                     | Kershner, Irvin                  | Irvin Kershner            | tt0086006 |
| 1746219100 | 1975 | 1975 | The Night They Robbed Big Bertha's            | The Night They Robbed Big Bertha's        | Kares, Peter                     | Peter Kares               | tt0222233 |
| 1746211090 | 1973 | 1972 | The Effect of Gamma Rays on Man-in-the-Moon P | The Effect of Gamma Rays on Man in the Mo | Newman, Paul                     | Paul Newman               | tt0068528 |
| 1746571477 | 1931 | 1931 | Valley of Bad Men                             | Valley of Badmen                          | Irwin, Jack                      | Jack Irwin                | tt7890664 |
| 1745359375 | 2010 | 2010 | Stolen                                        | Stolen                                    | Anderson, Anders                 | Kahlil Pedizisai          | tt1754543 |
| 1746421193 | 1995 | 1995 | One Night Stand                               | One Night Stand                           | Shire, Talia                     | Talia Shire               | tt0114042 |
| 1745302943 | 2007 | 2007 | Arctic Tale                                   | Arctic Tale                               | Ravetch, Adam ; Robertson, Sarah | Adam Ravetch              | tt0488508 |
| 1746235396 | 1976 | 1975 | Super Spook                                   | Super Spook                               | Major, Anthony                   | Anthony B. Major          | tt0247744 |
| 1746420137 | 1993 | 1993 | Street Knight                                 | Street Knight                             | Magnoli, Albert                  | Albert Magnoli            | tt0108234 |
| 1746420362 | 1994 | 1994 | Wagons East!                                  | Wagons East                               | Markle, Peter                    | Peter Markle              | tt0111653 |
| 1745373514 | 2002 | 2001 | The Cat's Meow                                | The Cat's Meow                            | Bogdanovich, Peter               | Peter Bogdanovich         | tt0266391 |
| 1746200060 | 1970 | 1970 | The Adversary                                 | The Adversary                             | Klein, Larry                     | Larry Klein               | tt0185845 |
| 1746218879 | 1977 | 1977 | Scott Joplin                                  | Scott Joplin                              | Kagan, Jeremy Paul               | Jeremy Kagan              | tt0076674 |
| 1746410862 | 1992 | 1991 | Cold Heaven                                   | Cold Heaven                               | Roeg, Nicolas                    | Nicolas Roeg              | tt0103982 |
| 1746235395 | 1979 | 1979 | The Muppet Movie                              | The Muppet Movie                          | Frawley, James                   | James Frawley             | tt0079588 |
| 1769974191 | 1970 | 1970 | Am I Female?                                  | Am I Female?                              |                                  |                           | tt0210492 |
| 1745342009 | 2004 | 2004 | Dirty Dancing: Havana Nights                  | Dirty Dancing: Havana Nights              | Ferland, Guy                     | Guy Ferland               | tt0338096 |
| 1745341843 | 2001 | 2001 | O                                             | The                                       | Nelson, Tim Blake                |                           | tt0778592 |
| 1745309265 | 2005 | 2005 | Living 'Til the End                           | Living 'til the End                       | Goodwin, Amanda                  | Amanda Goodwin            | tt0419922 |
| 1746422280 | 1998 | 1998 | Rock the Boat                                 | Rock the Boat                             | Houston, Bobby                   | Robert Houston            | tt0133015 |
| 1746409737 | 1988 | 1988 | Prison                                        | Poison                                    | Harlin, Renny                    | Jim Drake                 | tt1119155 |
| 1746409313 | 1992 | 1992 | Twin Peaks -- Fire Walk with Me               | Twin Peaks: Fire Walk with Me             | Lynch, David                     | David Lynch               | tt0105665 |
| 1745309641 | 2006 | 2006 | Tristan & Isolde                              | Tristan + Isolde                          | Reynolds, Kevin                  | Kevin Reynolds            | tt0375154 |
| 1745357940 | 2001 | 2000 | A Chronicle of Corpses                        | A Chronicle of Corpses                    | McElhinney, Andrew Repasky       | Andrew Repasky McElhinney | tt0249443 |
| 1745373526 | 2009 | 2009 | Earth Days                                    | Earth Day                                 | Stone, Robert                    | Mister Ooh                | tt1468715 |
| 1746408703 | 1988 | 1988 | Mondo New York                                | Mondo New York                            | Keith, Harvey                    | Harvey Keith              | tt0093558 |
| 1746394007 | 1986 | 1986 | Where the River Runs Black                    | Where the River Runs Black                | Cain, Christopher                | Christopher Cain          | tt0092205 |
| 1746260963 | 1980 | 1979 | Delirium                                      | Delirium                                  | Maris, Peter                     | Peter Maris               | tt0079039 |
| 1746423282 | 1994 | 1994 | A Good Man in Africa                          | A Good Man in Africa                      | Beresford, Bruce                 | Bruce Beresford           | tt0109920 |
| 1746235457 | 1973 | 1973 | The Man Who Loved Cat Dancing                 | The Man Who Loved Cat Dancing             | Sarafian, Richard C.             | Richard C. Sarafian       | tt0070363 |
| 1746394643 | 1990 | 1990 | The Spirit of '76                             | The Spirit of '76                         | Reiner, Lucas                    | Lucas Reiner              | tt0100670 |
| 1745342022 | 2002 | 2001 | Stripped                                      | Stripped                                  | Morley, Jill                     | Jill Morley               | tt0281233 |
| 1746269694 | 1976 | 1976 | Sammy Somebody                                | Sammy Somebody                            | Adler, Joseph                    | Joseph Adler              | tt0197848 |

|            |      |      |                                                 |                                              |                                     |                                  |           |
|------------|------|------|-------------------------------------------------|----------------------------------------------|-------------------------------------|----------------------------------|-----------|
| 1746251240 | 1975 | 1975 | Challenge to Be Free                            | Challenge to Be Free                         | Garnett, Tay                        | Tay Garnett                      | tt0074299 |
| 1745342514 | 2011 | 2010 | Devolved                                        | Devolved                                     | Cregan, John                        | John Cregan                      | tt1297925 |
| 1746394645 | 1985 | 1985 | Eleni                                           | Eleni                                        | Yates, Peter                        | Peter Yates                      | tt0089079 |
| 1746210484 | 1971 | 1971 | This Stuff'll Kill Ya!                          | This Stuff'll Kill Ya!                       | Lewis, Herschell Gordon             | Herschell Gordon Lewis           | tt0067850 |
| 1746454985 | 1997 | 1997 | Playing God                                     | Playing God                                  | Wilson, Andy                        | Andy Wilson                      | tt0119906 |
| 1745393734 | 2009 | 2008 | Not Quite Hollywood: The Wild, Untold Story of  | Not Quite Hollywood: The Wild, Untold Sto    | Hartley, Mark                       | Mark Hartley                     | tt0996966 |
| 1745341511 | 2011 | 2010 | Motherland                                      | Motherland                                   | Yeung, Doris                        | Owen Alik Shahadah               | tt1220221 |
| 1746392944 | 1982 | 1981 | Street Music                                    | Street Music                                 | Bowen, Jenny                        | Jenny Bowen                      | tt0083129 |
| 1745374578 | 2008 | 2008 | Dreams with Sharp Teeth                         | Dreams with Sharp Teeth                      | Nelson, Erik                        | Erik Nelson                      | tt1018887 |
| 1746234791 | 1971 | 1971 | Clay Pigeon                                     | Clay Pigeon                                  | Stern, Tom; Slate, Lane             | Lane Slate                       | tt0066920 |
| 1746393969 | 1990 | 1990 | Pump Up the Volume                              | Pump Up the Volume                           | Moyle, Allan                        | Allan Moyle                      | tt0100436 |
| 1746408672 | 1987 | 1987 | Rage of Honor                                   | Rage of Honor                                | Hessler, Gordon                     | Gordon Hessler                   | tt0093820 |
| 1746219250 | 1974 | 1974 | The Arena                                       | The Arena                                    | Carver, Steve                       | Steve Carver                     | tt0069729 |
| 1746423481 | 1993 | 1993 | Gift                                            | Rift                                         | Farrell, Perry ; Niccoli, Casey     | Edward S. Barkin                 | tt0107960 |
| 1745357621 | 2009 | 2008 | The Windmill Movie                              | The Windmill Movie                           | Olch, Alexander                     | Alexander Olch                   | tt1276996 |
| 1746410709 | 1992 | 1992 | A Woman, Her Men and Her Futon                  | A Woman, Her Men, and Her Futon              | Sibay, Mussef                       | Michael Sibay                    | tt0105836 |
| 1745396274 | 2009 | 2009 | Lifelines                                       | Life Lines                                   | Margolies, Rob                      | James William Evans              | tt1458257 |
| 1746210293 | 1971 | 1971 | Doctors' Wives                                  | Doctors' Wives                               | Schaefer, George                    | George Schaefer                  | tt0067004 |
| 1745342882 | 2002 | 2002 | Looking Through Lillian                         | Looking Through Lillian                      | Torem, Jake                         | Jake Torem                       | tt0285681 |
| 1746409521 | 1984 | 1984 | These Here Are My Feet                          | These Here Are My Feet                       | Yavneh, Cyrus                       | Cyrus Yavneh                     | tt0430673 |
| 1746419969 | 1994 | 1994 | Don't Pave Main Street -- Carmel's Heritage     | Don't Pave Main Street: Carmel's Heritage    | Ludwig, Julian; Cartwright, William | William T. Cartwright            | tt0109646 |
| 1746439727 | 1996 | 1996 | The Proprietor                                  | The Proprietor                               | Merchant, Ismail                    | Ismail Merchant                  | tt0117400 |
| 1746393240 | 1985 | 1985 | Alamo Bay                                       | Alamo Bay                                    | Malle, Louis                        | Louis Malle                      | tt0088689 |
| 1746409515 | 1986 | 1986 | Blue City                                       | Blue City                                    | Manning, Michelle                   | Michelle Manning                 | tt0090753 |
| 1745309142 | 2006 | 2006 | Saving Shiloh                                   | Saving Shiloh                                | Tung, Sandy                         | Sandy Tung                       | tt0472175 |
| 1746409503 | 1986 | 1986 | Breakthrough: A Portrait of Aristides Demetrios | Breakthrough: A Portrait of Aristides Demet  | Demetrios, Eames                    | Eames Demetrios                  | tt0370369 |
| 1746409452 | 1988 | 1988 | Sticky Fingers                                  | Sticky Fingers                               | Adams, Catlin                       | Catlin Adams                     | tt0096176 |
| 1746393455 | 1982 | 1982 | The Challenge                                   | The Challenge                                | Frankenheimer, John                 | John Frankenheimer               | tt0083726 |
| 1745396055 | 2010 | 2010 | The Tourist                                     | The Tourist                                  | von Donnersmarck, Florian Henckel   | Florian Henckel von Donnersmarck | tt1243957 |
| 1746273501 | 1978 | 1978 | The Mafu Cage                                   | The Mafu Cage                                | Arthur, Karen                       | Karen Arthur                     | tt0077888 |
| 1746421314 | 1995 | 1995 | Brian Wilson: I Just Wasn't Made for These Time | Brian Wilson: I Just Wasn't Made for These T | Was, Don                            | Don Was                          | tt0113367 |
| 1746219550 | 1971 | 1971 | The Last Valley                                 | The Last Valley                              | Clavell, James                      | James Clavell                    | tt0065969 |
| 1745357742 | 2008 | 2007 | Ping Pong Playa                                 | Ping Pong Playa                              | Yu, Jessica                         | Jessica Yu                       | tt0991167 |
| 1746435023 | 1989 | 1989 | Heart of Dixie                                  | Heart of Dixie                               | Davidson, Martin                    | Martin Davidson                  | tt0097490 |
| 1746201635 | 1970 | 1971 | Machismo--40 Graves for 40 Guns                 | Machismo: 40 Graves for 40 Guns              | Hunt, Paul                          | Paul Hunt                        | tt0066032 |
| 1745340118 | 2004 | 2003 | Easy                                            | Easy                                         | Weinstock, Jane                     | Jane Weinstock                   | tt0379270 |
| 1745342934 | 2008 | 2008 | Smart People                                    | Smart People                                 | Murro, Noam                         | Noam Murro                       | tt0858479 |
| 1746210322 | 1971 | 1971 | The Million Dollar Duck                         | The Million Dollar Duck                      | McEveety, Vincent                   | Vincent McEveety                 | tt0066728 |
| 1746393405 | 1988 | 1989 | Crime Zone                                      | Crime Zone                                   | Llosa, Luis                         | Luis Llosa                       | tt0094918 |
| 1746218876 | 1971 | 1971 | Swamp Girl                                      | Swamp Girl                                   | Davis, Don                          | Donald A. Davis                  | tt0152721 |
| 1746409511 | 1988 | 1988 | The Bear                                        | The Bear                                     | Mones, Paul                         | Jean                             | tt0095800 |
| 1745395328 | 2009 | 2009 | Armored                                         | Armored                                      | Antal, Nimród                       | Nimród Antal                     | tt0913354 |
| 1746235859 | 1978 | 1978 | The Norseman                                    | The Norseman                                 | Pierce, Charles B.                  | Charles B. Pierce                | tt0078007 |
| 1745303086 | 2004 | 2003 | Union Square                                    | Union Square                                 | Szklarski, Stephen J.               | Stephen Szklarski                | tt0404528 |
| 1746422921 | 1991 | 1990 | Privilege                                       | Privilege                                    | Rainer, Yvonne                      | Yvonne Rainer                    | tt0100418 |
| 1745373529 | 2010 | 2009 | The White Stripes Under Great White Northern I  | The White Stripes Under Great White North    | Malloy, Emmett                      | Emmett Malloy                    | tt1487275 |
| 1745293808 | 2005 | 2005 | The Rodnees: We Mod Like Dat!                   | The Rodnees: We Mod Like Dat!                | Farley, Lindley                     | Lindley Farley                   | tt0443623 |
| 1745272188 | 2001 | 2000 | Company Man                                     | Company Man                                  | McGrath, Douglas; Askin, Peter      | Peter Askin                      | tt0177650 |
| 1745302566 | 2006 | 2006 | Freedomland                                     | Freedomland                                  | Roth, Joe                           | Joe Roth                         | tt0349467 |
| 1745322650 | 2005 | 2005 | Rebound                                         | Rebound                                      | Carr, Steve                         | Steve Carr                       | tt0376108 |
| 1746393224 | 1984 | 1984 | The Californians                                | The Californians                             | von Wetter, Alexander               | Alexander von Wetter             | tt0402085 |
| 1745341459 | 2002 | 2002 | "Dobe" and a Company of Heroes                  | Dobe and a Company of Heroes                 | Schweikle, Tony                     | Tony Schweikle                   | tt0340077 |
| 1745309577 | 2005 | 2004 | Monumental: David Brower's Fight for Wild Am    | Monumental: David Brower's Fight for Wild    | Duane, Kelly                        | Kelly Duane                      | tt0427557 |
| 1745309206 | 2006 | 2006 | Urbanscapes                                     | Urbanscapes                                  | Luciano, Lorena ; Piscopo, Filippo  | Lorena Luciano                   | tt0829469 |
| 1745373309 | 2010 | 2010 | The Tillman Story                               | The Tillman Story                            | Bar-Lev, Amir                       | Amir Bar                         | tt1568334 |
| 1745315783 | 2011 | 2010 | London Boulevard                                | London Boulevard                             | Monahan, William                    | William Monahan                  | tt1213648 |
| 1746419199 | 1991 | 1992 | The Moneytree                                   | The Moneytree                                | Dienstag, Alan                      | Alan Dienstag                    | tt0107595 |

|            |      |      |                                                |                                                |                                    |                      |           |
|------------|------|------|------------------------------------------------|------------------------------------------------|------------------------------------|----------------------|-----------|
| 1769977354 | 1977 | 1977 | The Absent-Minded Waiter                       | The Absent Minded Waiter                       | Gottlieb, Carl                     | Carl Gottlieb        | tt0075626 |
| 1745282909 | 2005 | 2004 | The Work and the Glory                         | The Work and the Glory                         | Holt, Russ                         | Russell Holt         | tt0410454 |
| 1746210735 | 1973 | 1973 | I Escaped from Devil's Island                  | I Escaped from Devil's Island                  | Witney, William                    | William Witney       | tt0070205 |
| 1745375179 | 2010 | 2010 | The Romantics                                  | The Romantics                                  | Niederhoffer, Galt                 | Galt Niederhoffer    | tt1403988 |
| 1745340532 | 2004 | 2003 | The Brown Bunny                                | The Brown Bunny                                | Gallo, Vincent                     | Vincent Gallo        | tt0330099 |
| 1746219132 | 1974 | 1974 | Butley                                         | Butley                                         | Pinter, Harold                     | Harold Pinter        | tt0071260 |
| 1745342879 | 2001 | 2001 | In Search of Peace -- Part One: 1948-1967      | In Search of Peace Part One: 1948 1967         | Trank, Richard                     | Richard Trank        | tt7885532 |
| 1746422919 | 1993 | 1992 | Rain Without Thunder                           | Rain Without Thunder                           | Bennett, Gary                      | Gary O. Bennett      | tt0105215 |
| 1746218815 | 1972 | 1972 | Encounter with the Unknown                     | Encounter with the Unknown                     | Thomason, Harry                    | Harry Thomason       | tt0072937 |
| 1745360036 | 2002 | 2001 | 30 Years to Life                               | 30 Years to Life                               | Middleton, Vanessa                 | Vanessa Middleton    | tt0273048 |
| 1746420126 | 1987 | 1987 | Siesta                                         | Siesta                                         | Lambert, Mary                      | Mary Lambert         | tt0093969 |
| 1746218669 | 1974 | 1974 | Man on a Swing                                 | Man on a Swing                                 | Perry, Frank                       | Frank Perry          | tt0071806 |
| 1745374706 | 2009 | 2009 | Extract                                        | Extract                                        | Judge, Mike                        | Mike Judge           | tt1225822 |
| 1746439122 | 1997 | 1996 | Murder and Murder                              | MURDER and murder                              | Rainer, Yvonne                     | Yvonne Rainer        | tt0116949 |
| 1745309427 | 2006 | 2006 | El Cortez                                      | El Cortez                                      | Purvis, Stephen                    | Stephen Purvis       | tt0423372 |
| 1745359883 | 2010 | 2010 | Blood into Wine                                | Blood Into Wine                                | Page, Ryan; Pomeranke, Christopher | Ryan Page            | tt1394383 |
| 1745359709 | 2009 | 2009 | Perestroika                                    | Perestroika                                    | Tsukerman, Slava                   | Slava Tsukerman      | tt1001540 |
| 1746434330 | 1992 | 1992 | Alan & Naomi                                   | Alan & Naomi                                   | VanWagenen, Sterling               | Sterling Van Wagenen | tt0103640 |
| 1746248875 | 1973 | 1973 | Free                                           | Free                                           | Tenzen, Bert                       | Bert Tenzer          | tt0248813 |
| 1746409937 | 1988 | 1987 | Rent-A-Cop                                     | Rent a Cop                                     | London, Jerry                      | Jerry London         | tt0095977 |
| 1746235729 | 1976 | 1976 | Pipe Dreams                                    | Pipe Dreams                                    | Verona, Stephen                    | Stephen Verona       | tt0075068 |
| 1746211030 | 1970 | 1970 | King of the Grizzlies                          | King of the Grizzlies                          | Kelly, Ron                         | Ron Kelly            | tt0065943 |
| 1746218689 | 1972 | 1972 | Outside In                                     | Outside In                                     | Baron, Allen                       | Allen Baron          | tt0073614 |
| 1746423265 | 1998 | 1998 | Shadrach                                       | Shadrach                                       | Styron, Susanna                    | Susanna Styron       | tt0144604 |
| 1746235097 | 1976 | 1976 | Cat Murkil and the Silks                       | Cat Murkil and the Silks                       | Bushelman, John                    | John A. Bushelman    | tt0074294 |
| 1746249037 | 1980 | 1980 | In God We Trust                                | In God We Trust                                | Feldman, Marty                     | Marty Feldman        | tt0080917 |
| 1745271876 | 2000 | 1999 | The Weekend                                    | The Weekend                                    | Skeet, Brian                       | Brian Skeet          | tt0180301 |
| 1746218929 | 1974 | 1974 | The Treasure of Jamaica Reef                   | The Treasure of Jamaica Reef                   | Stone, Virginia                    | Virginia L. Stone    | tt0074504 |
| 1746420986 | 1994 | 1994 | Major League II                                | Major League II                                | Ward, David S.                     | David S. Ward        | tt0110442 |
| 1746408632 | 1981 | 1981 | The Night the Lights Went Out in Georgia       | The Night the Lights Went Out in Georgia       | Maxwell, Ronald F.                 | Ron Maxwell          | tt0082816 |
| 1746454589 | 1996 | 1995 | Heidi Fleiss: Hollywood Madam                  | Heidi Fleiss: Hollywood Madam                  | Broomfield, Nick                   | Nick Broomfield      | tt0113283 |
| 1746410720 | 1988 | 1988 | Stealing Home                                  | Stealing Home                                  | Kampmann, Steven; Aldis, Will      | Steven Kampmann      | tt0096171 |
| 1746423326 | 1996 | 1996 | She's the One                                  | She's the One                                  | Burns, Edward                      | Edward Burns         | tt0117628 |
| 1745393712 | 2007 | 2007 | Netherbeast Incorporated                       | Netherbeast Incorporated                       | Ronalds, Dean                      | Dean Matthew Ronalds | tt0787495 |
| 1746422162 | 1995 | 1995 | The Addiction                                  | The Addiction                                  | Ferrara, Abel                      | Abel Ferrara         | tt0112288 |
| 1745272039 | 2000 | 2000 | Strippers                                      | Strippers                                      | Ameer, Jorge                       | Jorge Ameer          | tt0261326 |
| 1746410841 | 1994 | 1994 | Living Proof: HIV and the Pursuit of Happiness | Living Proof: HIV and the Pursuit of Happiness | Cole, Kermit                       | Kermit Cole          | tt0107432 |
| 1746394537 | 1987 | 1987 | The Dead                                       | The Dead                                       | Huston, John                       | John Huston          | tt0092843 |
| 1746219385 | 1971 | 1971 | Jump                                           | Jump                                           | Manduke, Joe                       | Joseph Manduke       | tt0230383 |
| 1746419358 | 1989 | 1988 | Bum Rap                                        | Bum Rap                                        | Irom, Daniel                       | Danny Irom           | tt0094814 |
| 1746438482 | 2000 | 2000 | MVP: Most Valuable Primate                     | MVP: Most Valuable Primate                     | Vince, Robert                      | Robert Vince         | tt0196106 |
| 1746382358 | 1981 | 1981 | Escape from New York                           | Escape from New York                           | Carpenter, John                    | John Carpenter       | tt0082340 |
| 1745272613 | 2001 | 2001 | An American Rhapsody                           | An American Rhapsody                           | Gardos, Eva                        | Éva Gárdos           | tt0221799 |
| 1745374935 | 2010 | 2010 | Pure Country 2: The Gift                       | Pure Country 2: The Gift                       | Cain, Christopher                  | Christopher Cain     | tt1549571 |
| 1745359344 | 2009 | 2009 | Adam                                           | Adam                                           | Mayer, Max                         | Kyle Burns           | tt1501640 |
| 1745340987 | 2002 | 2002 | Love and Diane                                 | Love and Diane                                 | Dworkin, Jennifer                  | Jennifer Dworkin     | tt0329321 |
| 1746421664 | 1998 | 1998 | Wilbur Falls                                   | Wilbur Falls                                   | Glantz, Juliane                    | Juliane Hiam         | tt0138192 |
| 1746422101 | 1994 | 1993 | Naked in New York                              | Naked in New York                              | Algrant, Dan                       | Daniel Algrant       | tt0110623 |
| 1746394659 | 1987 | 1987 | The Curse                                      | The Curse                                      | Keith, David                       | David Keith          | tt0092809 |
| 1745374711 | 2010 | 2010 | Speed-Dating                                   | Speed Dating                                   | Elmore, Joseph A.                  | Joseph A. Elmore Jr. | tt1343110 |
| 1746249058 | 1976 | 1976 | The Return of a Man Called Horse               | The Return of a Man Called Horse               | Kershner, Irvin                    | Irvin Kershner       | tt0075132 |
| 1746218809 | 1974 | 1974 | The Castaway Cowboy                            | The Castaway Cowboy                            | McEveety, Vincent                  | Vincent McEveety     | tt0071288 |
| 1745359139 | 2011 | 2010 | The Desert of Forbidden Art                    | The Desert of Forbidden Art                    | Gerogiev, Tchavdar; Pope, Amanda   | Tchavdar Georgiev    | tt1536458 |
| 1746408485 | 1982 | 1982 | The Border                                     | The Border                                     | Richardson, Tony                   | Tony Richardson      | tt0083678 |
| 1746218677 | 1972 | 1972 | The Hoax                                       | The Hoax                                       | Anderson, Robert                   | Robert Anderson      | tt0201661 |
| 1746235071 | 1975 | 1975 | My Name Is Legend                              | My Name Is Legend                              | Kelly, Duke                        | Duke Kelly           | tt0197715 |
| 1745271692 | 2000 | 2000 | Followers                                      | Followers                                      | Flicker, Jonathan M.               | Jonathan M. Flicker  | tt0252445 |

|            |      |      |                                             |                                             |                        |                       |           |
|------------|------|------|---------------------------------------------|---------------------------------------------|------------------------|-----------------------|-----------|
| 1745359490 | 2004 | 2004 | Wild Roomies                                | Wild Roomies                                | Robins, Oliver         | Oliver Robins         | tt0224025 |
| 1746269620 | 1977 | 1977 | SuperVan                                    | Supervan                                    | Card, Lamar            | Lamar Card            | tt0070756 |
| 1746393442 | 1983 | 1983 | Trenchcoat                                  | Trenchcoat                                  | Tuchner, Michael       | Michael Tuchner       | tt0086476 |
| 1746393492 | 1984 | 1984 | Not For Publication                         | Not for Publication                         | Bartel, Paul           | Paul Bartel           | tt0087815 |
| 1746210754 | 1972 | 1972 | Arruza                                      | Arruza                                      | Boetticher, Budd       | Budd Boetticher       | tt0068223 |
| 1746436837 | 1999 | 1999 | Cool Crime                                  | Cool Crime                                  | Cohen-Oliver, Jerome   | Jérôme Cohen          | tt0190322 |
| 1745359794 | 2011 | 2010 | The Myth of the American Sleepover          | The Myth of the American Sleepover          | Mitchell, David Robert | David Robert Mitchell | tt1174042 |
| 1746393374 | 1984 | 1984 | Crackers                                    | Crackers                                    | Malle, Louis           | Louis Malle           | tt0087096 |
| 1746272570 | 1980 | 1980 | Rockshow                                    | Rockshow                                    |                        | Paul McCartney        | tt0079814 |
| 1746219707 | 1975 | 1975 | Capone                                      | Capone                                      | Carver, Steve          | Steve Carver          | tt0072761 |
| 1746394443 | 1992 | 1992 | 1991: The Year Punk Broke                   | 1991: The Year Punk Broke                   | Markey, Dave           | David Markey          | tt0103595 |
| 1746421658 | 1996 | 1996 | If Lucy Fell                                | If Lucy Fell                                | Schaeffer, Eric        | Eric Schaeffer        | tt0116606 |
| 1745302934 | 2007 | 2006 | Gray Matters                                | Gray Matters                                | Kramer, Sue            | Wendy Donigian        | tt1285256 |
| 1746454425 | 1999 | 1999 | Holy Smoke                                  | Holy Smoke                                  | Campion, Jane          | Jane Campion          | tt0144715 |
| 1746423270 | 1993 | 1993 | A Far Off Place                             | A Far Off Place                             | Salomon, Mikael        | Mikael Salomon        | tt0106868 |
| 1746235323 | 1979 | 1979 | Dreamer                                     | Dreamer                                     | Nosseck, Noel          | Noel Nosseck          | tt0079080 |
| 1746219603 | 1976 | 1975 | Against a Crooked Sky                       | Against a Crooked Sky                       | Bellamy, Earl          | Earl Bellamy          | tt0072615 |
| 1746433777 | 2000 | 2000 | Luminarias                                  | Luminarias                                  | Valenzuela, José Luis  | José Luis Valenzuela  | tt0160498 |
| 1746257383 | 1980 | 1980 | Raise the Titanic                           | Raise the Titanic                           | Jameson, Jerry         | Jerry Jameson         | tt0081400 |
| 1746436265 | 1995 | 1995 | The Journey of August King                  | The Journey of August King                  | Duigan, John           | John Duigan           | tt0113490 |
| 1746210541 | 1970 | 1970 | The Golden Box                              | The Golden Box                              | Davis, Don             | Donald A. Davis       | tt0139242 |
| 1746219051 | 1975 | 1975 | Broken Treaty at Battle Mountain            | Broken Treaty at Battle Mountain            | Freedman, Joel L.      | Joel L. Freedman      | tt0071250 |
| 1745358066 | 2009 | 2009 | The Lightkeepers                            | The Lightkeepers                            | Adams, Daniel          | Daniel Adams          | tt1156067 |
| 1746248865 | 1975 | 1974 | Fugitive Killer                             | Fugitive Killer                             | Harvard, Emile A.      | Emile A. Harvard      | tt0137624 |
| 1745358893 | 2010 | 2010 | Con Artist                                  | Con Artist                                  | Sladek, Michael        | Glenda Zurita         | tt2831466 |
| 1746272349 | 1978 | 1977 | Crossed Swords                              | Crossed Swords                              | Fleischer, Richard     | Richard Fleischer     | tt0077381 |
| 1746436212 | 1991 | 1991 | The Object of Beauty                        | The Object of Beauty                        | Lindsay-Hogg, Michael  | Michael Lindsay       | tt0102573 |
| 1746249064 | 1973 | 1973 | Jonathan Livingston Seagull                 | Jonathan Livingston Seagull                 | Bartlett, Hall         | Hall Bartlett         | tt0070248 |
| 1745394155 | 2008 | 2008 | Unspooled                                   | Unspooled                                   | Moreano, Keir          | Keir Moreano          | tt1183918 |
| 1746211262 | 1971 | 1971 | Von Richthofen and Brown                    | Von Richthofen and Brown                    | Corman, Roger          | Roger Corman          | tt0067658 |
| 1746248729 | 1975 | 1975 | Lady Cocoa                                  | Lady Cocoa                                  | Cimber, Matt           | Matt Cimber           | tt0073259 |
| 1745395091 | 2010 | 2010 | Cherry                                      | Cherry                                      | Fine, Jeffrey          | Jeffrey Fine          | tt1315350 |
| 1745303199 | 2007 | 2006 | My Brother                                  | My Brother                                  | Lover, Anthony         | Anthony Lover         | tt0451135 |
| 1746410355 | 1986 | 1986 | Tai-Pan                                     | Tai Pan                                     | Duke, Daryl            | Daryl Duke            | tt0092042 |
| 1745358876 | 2011 | 2010 | Peep World                                  | Peep World                                  | Blaustein, Barry W.    | Barry W. Blaustein    | tt1103273 |
| 1746211109 | 1972 | 1971 | Blindman                                    | Blindman                                    | Baldi, Ferdinando      | Ferdinando Baldi      | tt0066844 |
| 1745374770 | 2008 | 2007 | Glass: A Portrait of Philip in Twelve Parts | Glass: A Portrait of Philip in Twelve Parts | Hicks, Scott           | Scott Hicks           | tt1092004 |
| 1745342630 | 2011 | 2010 | Submarine                                   | Submarine                                   | Ayoade, Richard        | Richard Ayoade        | tt1440292 |
| 1745393715 | 2009 | 2009 | The Heretics                                | The Heretics                                | Braderman, Joan        | Joan Braderman        | tt1499958 |
| 1746455412 | 1997 | 1997 | Buddy                                       | Buddy                                       | Thompson, Caroline     | Caroline Thompson     | tt0118787 |
| 1745302950 | 2006 | 2006 | The Groomsmen                               | The Groomsmen                               | Burns, Edward          | Edward Burns          | tt0455958 |
| 1746209601 | 1970 | 1970 | Pound                                       | Pound                                       | Downey, Robert         | Robert Downey Sr.     | tt0066234 |
| 1746270582 | 1978 | 1977 | The Manitou                                 | The Manitou                                 | Girdler, William       | William Girdler       | tt0077904 |
| 1745342671 | 2008 | 2007 | Shoot on Sight                              | Shoot on Sight                              | Mundhra, Jag           | Jag Mundhra           | tt1038915 |
| 1746409326 | 1987 | 1987 | Campus Man                                  | Campus Man                                  | Casden, Ron            | Ron Casden            | tt0092717 |
| 1745374734 | 2001 | 2000 | Grateful Dawg                               | Grateful Dawg                               | Grisman, Gillian       | Gillian Grisman       | tt0265212 |
| 1746219625 | 1974 | 1973 | The Holy Mountain                           | The Holy Mountain                           | Jodorowsky, Alexandro  | Alejandro Jodorowsky  | tt0071615 |
| 1745341821 | 2008 | 2008 | Definitely, Maybe                           | Definitely, Maybe                           | Brooks, Adam           | Adam Brooks           | tt0832266 |
| 1746420218 | 1983 | 1983 | Marvin & Tige                               | Marvin & Tige                               | Weston, Eric           | Eric Weston           | tt0085908 |
| 1745358552 | 2009 | 2009 | Collapse                                    | Collapse                                    | Smith, Chris           | Mj Gardner            | tt1494667 |
| 1746421303 | 1996 | 1996 | Unhook the Stars                            | Unhook the Stars                            | Casavetes, Nick        | Nick Cassavetes       | tt0118044 |
| 1746219343 | 1972 | 1972 | The Ballad of Billie Blue                   | The Ballad of Billie Blue                   | Osborne, Kent          | Ken Osborne           | tt0151096 |
| 1746408441 | 1987 | 1987 | Wild Thing                                  | Wild Thing                                  | Reid, Max              | Max Reid              | tt0094325 |
| 1746218692 | 1972 | 1972 | Love Me Deadly                              | Love Me Deadly                              | LaCerte, Jacques       | Jacques Lacerte       | tt0136376 |
| 1745293802 | 2007 | 2007 | Black Irish                                 | Black Irish                                 | Gann, Brad             | Brad Gann             | tt0455915 |
| 1746394680 | 1991 | 1991 | Hangfire                                    | Hangfire                                    | Maris, Peter           | Peter Maris           | tt0101997 |
| 1745302503 | 2007 | 2007 | Amu                                         | Mu                                          | Bose, Shonali          | Paul Yacono           | tt1000132 |

|                   |             |             |                                               |                                               |                                 |                       |                  |   |
|-------------------|-------------|-------------|-----------------------------------------------|-----------------------------------------------|---------------------------------|-----------------------|------------------|---|
| 1745374127        | 2003        | 2002        | Manito                                        | Manito                                        | Eason, Eric                     | Eric Eason            | tt0298050        |   |
| 1746210448        | 1971        | 1971        | Murphy's War                                  | Murphy's War                                  | Yates, Peter                    | Peter Yates           | tt0067458        |   |
| 1745359579        | 2011        | 2010        | Wrecked                                       | Wrecked                                       | Greenspan, Michael              | Michael Greenspan     | tt1316622        |   |
| 1746454720        | 1996        | 1996        | Message to Love: The Isle of Wight Festival   | Message to Love: The Isle of Wight Festival   | Lerner, Murray                  | Murray Lerner         | tt0117028        |   |
| 1746439457        | 1997        | 1996        | Wedding Bell Blues                            | Wedding Bell Blues                            | Lustig, Dana                    | Dana Lustig           | tt0118127        |   |
| 1746202245        | 1970        | 1970        | Rabbit, Run                                   | Rabbit, Run                                   | Smight, Jack                    | Jack Smight           | tt0066274        |   |
| 1746419208        | 1988        | 1988        | Spike of Bensonhurst                          | Spike of Bensonhurst                          | Morrissey, Paul                 | Paul Morrissey        | tt0096156        |   |
| 1746436928        | 2000        | 1999        | The Boondock Saints                           | The Boondock Saints                           | Duffy, Troy                     | Troy Duffy            | tt0144117        |   |
| 1746197932        | 1970        | 1970        | El Condor                                     | El Condor                                     | Guillermin, John                | John Guillermin       | tt0065570        |   |
| 1746410672        | 1988        | 1988        | Break of Dawn                                 | Break of Dawn                                 | Artenstein, Isaac               | Isaac Artenstein      | tt0099176        |   |
| 1746419141        | 1994        | 1994        | Blue Chips                                    | Blue Chips                                    | Friedkin, William               | William Friedkin      | tt0109305        |   |
| 1746409788        | 1988        | 1988        | Rented Lips                                   | Rented Lips                                   | Downey, Robert                  | Robert Downey Sr.     | tt0095978        |   |
| 1746219171        | 1973        | 1973        | Never Look Back                               | Never Look Back                               | Monson, Carl                    | Carl Monson           | tt3519472        |   |
| 1746218915        | 1974        | 1974        | The Midnight Man                              | The Midnight Man                              | Kibbee, Roland; Lancaster, Burt | Roland Kibbee         | tt0071838        |   |
| 1746409812        | 1991        | 1991        | Defenseless                                   | Defenseless                                   | Campbell, Martin                | Martin Campbell       | tt0099397        |   |
| 1745302786        | 2007        | 2006        | 'Tis Autumn: The Search for Jackie Paris      | 'Tis Autumn: The Search for Jackie Paris      | De Felitta, Raymond             | Raymond De Felitta    | tt0491877        |   |
| 1746235923        | 1974        | 1974        | Seven Alone                                   | Seven Alone                                   | Bellamy, Earl                   | Earl Bellamy          | tt0073686        |   |
| 1746203273        | 1971        | 1971        | The African Elephant                          | The African Elephant                          | Trevor, Simon                   | Simon Trevor          | tt0141517        |   |
| 1746393953        | 1981        | 1981        | Subway Riders                                 | Subway Riders                                 | Poe, Amos                       | Amos Poe              | tt0083138        |   |
| 1746420768        | 1995        | 1995        | Harlem Diary: Nine Voices of Resilience       | Harlem Diary: Nine Voices of Resilience       | Stack, Jonathan                 | Jonathan Stack        | tt0113263        |   |
| 1745359895        | 2009        | 2008        | The Last International Playboy                | The Last International Playboy                | Clark, Steve                    | Steve Clark           | tt1037090        |   |
| 1746437131        | 1996        | 1996        | The Hippie Revolution                         | The Hippie Revolution                         | O'Connell, Jack                 | Jack O'Connell        | tt0116536        |   |
| 1745359744        | 2003        | 2002        | Operation Midnight Climax                     | Operation Midnight Climax                     | Keenan, Will; Harel, Gadi       | Gadi Harel            | tt0320212        |   |
| <b>1746410213</b> | <b>1985</b> | <b>1984</b> | <b>Lily in Love</b>                           | <b>Lily in Love</b>                           | <b>Makk, Karoly</b>             | <b>Károly Makk</b>    | <b>tt0089365</b> | 1 |
| <b>1746454323</b> | <b>1998</b> | <b>1998</b> | <b>Sour Grapes</b>                            | <b>Sour Grapes</b>                            | <b>David, Larry</b>             | <b>Larry David</b>    | <b>tt0120838</b> | 1 |
| 1746433578        | 1996        | 1996        | The Ghost and the Darkness                    | The Ghost and the Darkness                    | Hopkins, Stephen                | Stephen Hopkins       | tt0116409        |   |
| 1745341477        | 2008        | 2007        | Meat Loaf: In Search of Paradise              | Meat Loaf: In Search of Paradise              | Klein, Bruce David              | Bruce David Klein     | tt1034080        |   |
| 1745340959        | 2001        | 2000        | Fast Food Fast Women                          | Fast Food Fast Women                          | Kollek, Amos                    | Amos Kollek           | tt0206742        |   |
| 1746410704        | 1993        | 1992        | Praying with Anger                            | Praying with Anger                            | Shyamalan, M. Night             | M. Night Shyamalan    | tt0105162        |   |
| 1746409954        | 1989        | 1989        | Music Box                                     | Music Box                                     | Costa-Gavras                    | Costa                 | tt0100211        |   |
| 1746423287        | 1994        | 1994        | The Hudsucker Proxy                           | The Hudsucker Proxy                           | Coen, Joel                      | Joel Coen             | tt0110074        |   |
| 1746437629        | 1996        | 1996        | Race the Sun                                  | Race the Sun                                  | Kanganis, Charles T.            | Charles T. Kanganis   | tt0117427        |   |
| 1746433560        | 1991        | 1991        | And You Thought Your Parents Were Weird       | And You Thought Your Parents Were Weird       | Cookson, Tony                   | Tony Cookson          | tt0101343        |   |
| 1746235285        | 1973        | 1973        | Scalawag                                      | Scalawag                                      | Douglas, Kirk                   | Kirk Douglas          | tt0070642        |   |
| 1746218853        | 1980        | 1980        | Beyond Evil                                   | Beyond Evil                                   | Freed, Herb                     | Herb Freed            | tt0080431        |   |
| 1746454423        | 1997        | 1996        | Kama Sutra: A Tale of Love                    | Kama Sutra: A Tale of Love                    | Nair, Mira                      | Mira Nair             | tt0116743        |   |
| 1746393292        | 1988        | 1988        | The Good Mother                               | The Good Mother                               | Nimoy, Leonard                  | Leonard Nimoy         | tt0095238        |   |
| 1746422519        | 1999        | 1998        | La Cucaracha                                  | La Cucaracha                                  | Perez, Jack                     | Jack Perez            | tt0157913        |   |
| 1745394333        | 2011        | 2010        | Life 2.0                                      | Life 2.0                                      | Spingarn-Koff, Jason            | Jason Spingarn        | tt1518809        |   |
| 1745359270        | 2004        | 2004        | Games People Play: New York                   | Games People Play: New York                   | Whitney, James Ronald           | James Ronald Whitney  | tt0371683        |   |
| 1745372493        | 2009        | 2009        | Knowing                                       | Knowing                                       | Proyas, Alex                    | Alex Proyas           | tt0448011        |   |
| 1746421070        | 1992        | 1992        | Monster in a Box                              | Monster in a Box                              | Broomfield, Nick                | Nick Broomfield       | tt0102467        |   |
| 1746409277        | 1992        | 1992        | The Whole Truth                               | The Whole Truth                               | Cohen, Dan ; Smythe, Jonathan   | Dan Cohen             | tt0208569        |   |
| 1746394419        | 1987        | 1987        | Leonard Part 6                                | Leonard Part 6                                | Weiland, Paul                   | Paul Weiland          | tt0093405        |   |
| 1746394763        | 1983        | 1983        | The Sting II                                  | The Sting II                                  | Kagan, Jeremy Paul              | Jeremy Kagan          | tt0086370        |   |
| 1746393314        | 1986        | 1986        | The Patriot                                   | The Patriot                                   | Harris, Frank                   | Frank Harris          | tt0091734        |   |
| 1745303128        | 2007        | 2007        | The Boy Who Cried Bitch: The Adolescent Years | The Boy Who Cried Bitch: The Adolescent Years | Levin, Matthew                  | Mathew Levin II       | tt0780488        |   |
| 1746455427        | 1994        | 1994        | Oleanna                                       | Oleanna                                       | Mamet, David                    | David Mamet           | tt0110722        |   |
| 1746257701        | 1979        | 1979        | Ken Murray Shooting Stars                     | Ken Murray Shooting Stars                     | Murray, Ken                     | Ken Murray            | tt0079395        |   |
| 1745341291        | 2003        | 2002        | Blue Car                                      | Blue Car                                      | Moncrieff, Karen                | Karen Moncrieff       | tt0290145        |   |
| 1745341212        | 2008        | 2008        | Standard Operating Procedure                  | Standard Operating Procedure                  | Morris, Errol                   | Errol Morris          | tt0896866        |   |
| 1746216703        | 1970        | 1970        | The Sky Pirate                                | The Sky Pirate                                | Meyer, Andrew                   | Andrew Meyer          | tt0258165        |   |
| 1745341322        | 2008        | 2008        | Bangkok Dangerous                             | Bangkok Dangerous                             |                                 | Danny Pang            | tt0814022        |   |
| 1746408908        | 1982        | 1982        | O'Hara's Wife                                 | O'Hara's Wife                                 | Bartman, William                | Bill Bartman          | tt0084431        |   |
| 1746409076        | 1984        | 1984        | Vamping                                       | Vamping                                       | Keller, Frederick King          | Frederick King Keller | tt0088337        |   |
| 1746433545        | 1990        | 1990        | False Identity                                | False Identity                                | Keach, James                    | James Keach           | tt0099541        |   |
| 1769977355        | 1977        | 1977        | 1988: The Remake                              | 1988: The Remake                              | Schmidt, Richard R.             | Rick Schmidt          | tt0075609        |   |



|            |      |      |                                         |                                         |                                       |                     |            |
|------------|------|------|-----------------------------------------|-----------------------------------------|---------------------------------------|---------------------|------------|
| 1746202293 | 1970 | 1971 | Love Is a Carousel                      | Love Is a Carousel                      | Cheverton, Roy P.                     | Roy P. Cheverton    | tt0127668  |
| 1746455300 | 1995 | 1995 | Leona's Sister Gerri                    | Leona's Sister Gerri                    | Gillooly, Jane                        | Jane Gillooly       | tt0113635  |
| 1746257377 | 1976 | 1976 | Union Maids                             | Union Maids                             | Klein, James; Reichert, Julia; Mogule | Jim Klein           | tt0075372  |
| 1745331893 | 2011 | 2010 | Don't Be Afraid of the Dark             | Don't Be Afraid of the Dark             | Nixey, Troy                           | Troy Nixey          | tt1270761  |
| 1746393491 | 1988 | 1988 | The Drifter                             | The Drifter                             | Brand, Larry                          | Larry Brand         | tt0095067  |
| 1746219742 | 1975 | 1975 | Royal Flash                             | Royal Flash                             | Lester, Richard                       | Richard Lester      | tt0073639  |
| 1745309214 | 2006 | 2006 | Mission: Impossible III                 | Mission: Impossible III                 | Abrams, J. J.                         | J.J. Abrams         | tt0317919  |
| 1745272229 | 2000 | 2000 | Where the Money Is                      | Where the Money Is                      | Kanievska, Marek                      | Marek Kanievska     | tt0149367  |
| 1745309713 | 2007 | 2006 | Right at Your Door                      | Right at Your Door                      | Gorak, Chris                          | Chris Gorak         | tt0458367  |
| 1746258150 | 1978 | 1977 | Secrets                                 | Secrets                                 | Saville, Philip                       | Paul Wendkos        | tt0076678  |
| 1745374989 | 2010 | 2009 | Saint Misbehavin': The Wavy Gravy Movie | Saint Misbehavin': The Wavy Gravy Movie | Esrick, Michelle                      | Michelle Esrick     | tt1326259  |
| 1746393355 | 1983 | 1982 | Waltz Across Texas                      | Waltz Across Texas                      | Day, Ernest                           | Ernest Day          | tt0084886  |
| 1745357599 | 2010 | 2009 | Pop Star on Ice                         | Pop Star on Ice                         | Barba, David; Pellerito, James        | David Barba         | tt1329422  |
| 1746454450 | 1995 | 1995 | Goldeneye                               | GoldenEye                               | Campbell, Martin                      | Martin Campbell     | tt0113189  |
| 1746218781 | 1971 | 1971 | The Seven Minutes                       | The Seven Minutes                       | Meyer, Russ                           | Russ Meyer          | tt0067736  |
| 1746423324 | 1990 | 1990 | Genuine Risk                            | Genuine Risk                            | Voss, Kurt                            | Kurt Voss           | tt0099642  |
| 1745372605 | 2008 | 2008 | Chapter 27                              | Chapter 2                               | Schaefer, J. P.                       | Avesta Jowkar       | tt1377134  |
| 1745339967 | 2004 | 2003 | Intoxicating                            | Intoxicating                            | David, Mark                           | Mark David          | tt0326976  |
| 1746420148 | 1988 | 1988 | Masquerade                              | Masquerade                              | Swaim, Bob                            | Bob Swaim           | tt0095599  |
| 1746410667 | 1992 | 1991 | Guilty as Charged                       | Guilty as Charged                       | Irvin, Sam                            | Sam Irvin           | tt0101983  |
| 1745395354 | 2008 | 2008 | All of Us                               | All of Us                               | Abt, Emily                            | Emily Abt           | tt0826579  |
| 1746454795 | 1998 | 1998 | Day at the Beach                        | Day at the Beach                        | Veronis, Nick                         | Nick Veronis        | tt0112810  |
| 1745272326 | 2001 | 2001 | The American Astronaut                  | The American Astronaut                  | McAbee, Cory                          | Cory McAbee         | tt0243759  |
| 1746409063 | 1989 | 1989 | All's Fair...                           | All's Fair                              | Lang, Rocky                           | Rocky Lang          | tt0096789  |
| 1745293254 | 2006 | 2006 | Perfume - The Story of a Murderer       | Perfume: The Story of a Murderer        | Tykwer, Tom                           | Tom Tykwer          | tt0396171  |
| 1746250979 | 1980 | 1979 | A Force of One                          | A Force of One                          | Aaron, Paul                           | Paul Aaron          | tt0079168  |
| 1746210913 | 1972 | 1972 | Rage                                    | Rage                                    | Scott, George C.                      | George C. Scott     | tt0069158  |
| 1745394598 | 2010 | 2009 | TIMER                                   | Time                                    | Schaeffer, Jac                        | Richard Levine      | tt1454698  |
| 1746219347 | 1972 | 1971 | The Gatling Gun                         | The Gatling Gun                         | Gordon, Robert                        | Robert Gordon       | tt0070091  |
| 1746250978 | 1977 | 1977 | Equus                                   | Equus                                   | Lumet, Sidney                         | Sidney Lumet        | tt0075995  |
| 1746423747 | 1998 | 1998 | The Man in the Iron Mask                | The Man in the Iron Mask                | Wallace, Randall                      | William Richert     | tt0141574  |
| 1745302638 | 2007 | 2006 | Dr. Bronner's Magic Soapbox             | Dr. Bronner's Magic Soapbox             | Lamm, Sara                            | Sara Lamm           | tt00881909 |
| 1745374007 | 2008 | 2008 | The Reader                              | The Reader                              | Daldry, Stephen                       | Stephen Daldry      | tt0976051  |
| 1745294014 | 2006 | 2006 | Wide Awake                              | Wide Awake                              | Berliner, Alan                        | Alan Berliner       | tt0492502  |
| 1746198245 | 1970 | 1970 | The Secret of the Sacred Forest         | The Secret of the Sacred Forest         | Du Pont, Michael                      | Michael Du Pont     | tt0066348  |
| 1745372510 | 2010 | 2010 | Restrepo                                | Restrepo                                | Hetherington, Tim; Junger, Sebastian  | Tim Hetherington    | tt1559549  |
| 1769971141 | 1970 | 1970 | Sticks and Stones                       | Sticks and Stones                       | LoPresto, Stan                        | Stan Lopresto       | tt0221583  |
| 1746259070 | 1976 | 1975 | Inside Out                              | Inside Out                              | Duffell, Peter                        | Peter Duffell       | tt0073174  |
| 1745374603 | 2011 | 2010 | A Little Help                           | A Little Help                           | Weithorn, Michael J.                  | Michael J. Weithorn | tt1319722  |
| 1746420977 | 1989 | 1988 | Crusoe                                  | Crusoe                                  | Deschanel, Caleb                      | Caleb Deschanel     | tt0094923  |
| 1746455678 | 1999 | 1999 | Ride with the Devil                     | Ride with the Devil                     | Lee, Ang                              | Donald G. Jackson   | tt0240867  |
| 1745394161 | 2008 | 2007 | Obscene                                 | Obscene                                 | Ortenberg, Neil ; O'Connor, Daniel    | Daniel O'Connor     | tt1093849  |
| 1746420213 | 1994 | 1994 | Intersection                            | Intersection                            | Rydell, Mark                          | Mark Rydell         | tt0110146  |
| 1746409458 | 1989 | 1989 | Veiled Threat                           | Veiled Threat                           | Nowrasteh, Cyrus                      | Cyrus Nowrasteh     | tt0098582  |
| 1745375192 | 2010 | 2010 | Going Blind                             | Going Blind                             | Lovett, Joseph F.                     | Joseph F. Lovett    | tt1196941  |
| 1745272264 | 2000 | 1999 | On the Run                              | On the Run                              | de Almeida, Bruno                     | Bruno de Almeida    | tt0120658  |
| 1746235246 | 1974 | 1974 | Dead of Night                           | Dead of Night                           | Clark, Bob                            | Bob Clark           | tt0068457  |
| 1746419620 | 1993 | 1993 | Eye of the Stranger                     | Eye of the Stranger                     | Heavener, David                       | David Heavener      | tt0106851  |
| 1745374514 | 2008 | 2009 | Backseat                                | The Backseat                            | Van Dusen, Bruce                      | Chris R. Notarile   | tt1536046  |
| 1746219412 | 1975 | 1975 | Abduction                               | Abduction                               | Zito, Joseph                          | Joseph Zito         | tt0072597  |
| 1745339960 | 2001 | 2001 | High Heels and Low Lifes                | High Heels and Low Lifes                | Smith, Mel                            | Mel Smith           | tt0253126  |
| 1745393778 | 2010 | 2010 | Helena from the Wedding                 | Helena from the Wedding                 | Infantolino, Joseph                   | Joseph Infantolino  | tt1394211  |
| 1745372429 | 2003 | 2003 | Catching Out                            | Catching Out                            | George, Sarah                         | Sarah George        | tt0337595  |
| 1745359751 | 2001 | 2001 | Rocky Road                              | Rocky Road                              | Cunningham, Geoff                     | Geoff Cunningham    | tt0203078  |
| 1746420777 | 1993 | 1993 | The Saint of Fort Washington            | The Saint of Fort Washington            | Hunter, Tim                           | Tim Hunter          | tt0108026  |
| 1745302911 | 2007 | 2006 | Seraphim Falls                          | Seraphim Falls                          | von Ancken, David                     | David Von Ancken    | tt0479537  |
| 1745309400 | 2006 | 2005 | Issues                                  | Issues                                  | Elder, Van                            | Van Elder           | tt0431155  |

|                   |             |             |                                      |                                      |                                        |                        |                  |
|-------------------|-------------|-------------|--------------------------------------|--------------------------------------|----------------------------------------|------------------------|------------------|
| 1746420350        | 1988        | 1987        | Sister Sister                        | Sister, Sister                       | Condon, Bill                           | Bill Condon            | tt0093980        |
| 1746421951        | 1997        | 1996        | Shakespeare's Children               | Shakespeare's Children               | Light, Allie; Saraf, Irving            | Allie Light            | tt0117614        |
| <b>1746420766</b> | <b>1996</b> | <b>1996</b> | <b>A Leap of Faith</b>               | <b>A Leap of Faith</b>               | <b>McShane, Jenifer; Regan, Tricia</b> | <b>Jenifer McShane</b> | <b>tt0116846</b> |
| 1745342715        | 2008        | 2008        | On the Other Hand, Death             | On the Other Hand, Death             | Oliver, Ron                            | Ron Oliver             | tt1238298        |
| 1745309233        | 2006        | 2005        | Winter Passing                       | Winter Passing                       | Rapp, Adam                             | Adam Rapp              | tt0380817        |
| 1746219403        | 1980        | 1980        | Foolin' Around                       | Foolin' Around                       | Heffron, Richard T.                    | Richard T. Heffron     | tt0080750        |
| 1746409053        | 1991        | 1990        | Bright Angel                         | Bright Angel                         | Fields, Michael                        | Michael Fields         | tt0101510        |
| 1746410406        | 1992        | 1992        | Once Upon a Crime...                 | Once Upon a Crime...                 | Levy, Eugene                           | Eugene Levy            | tt0101625        |
| 1746408640        | 1981        | 1981        | Image Before My Eyes                 | Image Before My Eyes                 | Waletzky, Josh                         | Joshua Waletzky        | tt0126957        |
| 1745340298        | 2002        | 2001        | Home Movie                           | Home Movie                           | Smith, Chris                           | Chris Smith            | tt0275408        |
| 1746440061        | 1998        | 1997        | Digging to China                     | Digging to China                     | Hutton, Timothy                        | Timothy Hutton         | tt0118980        |
| 1745302511        | 2006        | 2005        | The Last Dispatch                    | The Last Dispatch                    | Schleppi, Helmut                       | Helmut Schleppi        | tt0453508        |
| 1745372600        | 2008        | 2007        | The Doorman                          | The Doorman                          | Price, Wayne                           | Wayne Price            | tt0762093        |
| 1746200055        | 1970        | 1970        | Imago                                | Imago                                | Bosnick, Ned                           | Ned Bosnick            | tt0065883        |
| 1745342485        | 2002        | 2002        | Bowling for Columbine                | Bowling for Columbine                | Moore, Michael                         | Michael Moore          | tt0310793        |
| 1745394280        | 2008        | 2008        | Felon                                | Felon                                | Waugh, Ric Roman                       | Ric Roman Waugh        | tt1117385        |
| 1746235455        | 1976        | 1976        | Treasure of Matecumbe                | Treasure of Matecumbe                | McEveety, Vincent                      | Vincent McEveety       | tt0075347        |
| 1746454970        | 1998        | 1998        | Williamstowne                        | Williamstowne                        | Horian, Richard                        | Richard Horian         | tt0178106        |
| 1746454272        | 1996        | 1996        | Fire on the Mountain                 | Fire on the Mountain                 | Gage, Beth; Gage, George               | Beth Gage              | tt0116310        |
| 1746235091        | 1973        | 1973        | Fly Me                               | Fly Me                               | Santiago, Cirio                        | Cirio H. Santiago      | tt0068599        |
| 1746409801        | 1980        | 1979        | The Last of the Blue Devils          | The Last of the Blue Devils          | Ricker, Bruce                          | Bruce Ricker           | tt0079443        |
| 1746271431        | 1979        | 1979        | Fast Break                           | Fast Break                           | Smight, Jack                           | Jack Smight            | tt0079136        |
| 1746210192        | 1970        | 1970        | Norwood                              | Norwood                              | Haley, Jack                            | Jack Haley Jr.         | tt0066162        |
| 1745340020        | 2003        | 2003        | The Company                          | The Company                          | Altman, Robert                         | Robert Altman          | tt0335013        |
| 1746421145        | 1994        | 1994        | Tom & Viv                            | Tom & Viv                            | Gilbert, Brian                         | Brian Gilbert          | tt0111454        |
| 1746256627        | 1975        | 1975        | Pick-up                              | Pick up                              | Hirschenson, Bernie                    | Bernard Hirschenson    | tt0254688        |
| 1746393346        | 1987        | 1986        | Positive I.D.                        | Positive I.D.                        | Anderson, Andy                         | Andy Anderson          | tt0093763        |
| 1746433740        | 1998        | 1998        | Dangerous Beauty                     | Dangerous Beauty                     | Herskovitz, Marshall                   | Marshall Herskovitz    | tt0118892        |
| 1745302859        | 2007        | 2007        | Banished                             | Vanished                             | Shabkhiz, Omid                         | Roya Aryanpad          | tt1381894        |
| 1746382298        | 1982        | 1982        | Vice Squad                           | Vice Squad                           | Sherman, Gary A.                       | Gary Sherman           | tt0084861        |
| 1745372593        | 2002        | 2002        | Love Liza                            | Love Liza                            | Louiso, Todd                           | Todd Louiso            | tt0282698        |
| 1746434345        | 1999        | 1999        | Siegfried and Roy: The Magic Box     | Siegfried & Roy: The Magic Box       | Leonard, Brett                         | Brett Leonard          | tt0182299        |
| 1746211213        | 1972        | 1972        | The Gentle People and the Quiet Land | The Gentle People and the Quiet Land | Norris, Rich                           | Richard Bartlett       | tt0179192        |
| 1746209752        | 1970        | 1970        | Kelly's Heroes                       | Kelly's Heroes                       | Hutton, Brian G.                       | Brian G. Hutton        | tt0065938        |
| 1746455369        | 1996        | 1995        | The Grass Harp                       | The Grass Harp                       | Matthau, Charles                       | Charles Matthau        | tt0113211        |
| 1746421324        | 1990        | 1989        | The Lemon Sisters                    | The Lemon Sisters                    | Chopra, Joyce                          | Joyce Chopra           | tt0100003        |
| 1746249289        | 1976        | 1976        | Nickelodeon                          | Nickelodeon                          | Bogdanovich, Peter                     | Peter Bogdanovich      | tt0074964        |
| 1746235304        | 1977        | 1977        | Breaker! Breaker!                    | Breaker! Breaker!                    | Hulette, Don                           | Don Hulette            | tt0075783        |
| 1746258890        | 1974        | 1974        | Challenge                            | Challenge                            | Beck, Martin                           | Martin Beck            | tt0071298        |
| 1746235582        | 1979        | 1978        | On the Yard                          | On the Yard                          | Silver, Raphael D.                     | Raphael D. Silver      | tt0079665        |
| 1746203095        | 1970        | 1970        | Cromwell                             | Cromwell                             | Hughes, Ken                            | Ken Hughes             | tt0065593        |
| 1746210823        | 1973        | 1973        | Group Marriage                       | Group Marriage                       | Rothman, Stephanie                     | Stephanie Rothman      | tt0068664        |
| 1746434257        | 1991        | 1990        | Dead Men Don't Die                   | Dead Men Don't Die                   | Marmorstein, Malcolm                   | Malcolm Marmorstein    | tt0099374        |
| 1746261385        | 1978        | 1978        | The Secret Life of Plants            | The Secret Life of Plants            | Green, Walon                           | Walon Green            | tt0078217        |
| 1745395344        | 2010        | 2009        | Floored                              | Floored                              | Smith, James Allen                     | James Allen Smith      | tt1326220        |
| 1746410354        | 1988        | 1987        | Stranded                             | Stranded                             | Fuller, Tex                            | Fleming B. Fuller      | tt0094050        |
| 1746409367        | 1984        | 1984        | Purple Hearts                        | Purple Hearts                        | Furie, Sidney J.                       | Sidney J. Furie        | tt0087956        |
| 1745374960        | 2010        | 2009        | The Assistants                       | The Assistants                       | Morris, Steve                          | Steve Morris           | tt1247638        |
| 1745359847        | 2002        | 2001        | All the Queen's Men                  | All the Queen's Men                  | Ruzowitzky, Stefan                     | Stefan Ruzowitzky      | tt0252223        |
| 1746420549        | 1992        | 1991        | Mississippi Masala                   | Mississippi Masala                   | Nair, Mira                             | Mira Nair              | tt0102456        |
| 1746235253        | 1973        | 1973        | Life Study                           | Life Study                           | Nebbia, Michael                        | Michael Nebbia         | tt0070316        |
| 1746408909        | 1991        | 1990        | Lonely in America                    | Lonely in America                    | Brown, Barry Alexander                 | Barry Alexander Brown  | tt0102330        |
| 1746219750        | 1973        | 1972        | The Cremators                        | The Cremators                        | Essex, Harry                           | Harry Essex            | tt0068425        |
| 1746257998        | 1977        | 1977        | Moonshine County Express             | Moonshine County Express             | Trikonis, Gus                          | Gus Trikonis           | tt0076409        |
| 1745342626        | 2010        | 2010        | I'm Still Here                       | I'm Still Here                       | Affleck, Casey                         | Tom Blomquist          | tt1701997        |
| 1745293196        | 2005        | 2005        | The Greatest Game Ever Played        | The Greatest Game Ever Played        | Paxton, Bill                           | Bill Paxton            | tt0388980        |
| 1746271909        | 1978        | 1978        | Five Days from Home                  | Five Days from Home                  | Peppard, George                        | George Peppard         | tt0077557        |

|            |      |      |                                                   |                                              |                                      |                       |           |
|------------|------|------|---------------------------------------------------|----------------------------------------------|--------------------------------------|-----------------------|-----------|
| 1745332398 | 2011 | 2010 | Echotone                                          | Echotone                                     | Christ, Nathan                       | Nathan Christ         | tt1532946 |
| 1746409088 | 1988 | 1988 | Miles from Home                                   | Miles from Home                              | Sinise, Gary                         | Gary Sinise           | tt0095640 |
| 1746453907 | 1999 | 1998 | Beautopia                                         | Beautopia                                    | Otto, Katharina                      | Katharina Otto        | tt0139057 |
| 1745373767 | 2010 | 2010 | Anton Chekhov's The Duel                          | Anton Chekhov's The Duel                     | Kosashvili, Dover                    | Dover Koshashvili     | tt1282041 |
| 1746235063 | 1978 | 1978 | Superman                                          | Superman                                     | Donner, Richard                      | Richard Donner        | tt0078346 |
| 1746421064 | 1986 | 1985 | Echo Park                                         | Echo Park                                    | Dornhelm, Robert                     | Robert Dornhelm       | tt0090994 |
| 1746454463 | 1999 | 1998 | Wrestling with Alligators                         | Wrestling with Alligators                    | Weltz, Laurie                        | Laurie Weltz          | tt0139745 |
| 1746423579 | 1996 | 1996 | It's Elementary: Talking About Gay Issues in Scho | It's Elementary: Talking About Gay Issues in | Chasnoff, Debra                      | Debra Chasnoff        | tt0116659 |
| 1746423319 | 1994 | 1994 | Between the Teeth                                 | Between the Teeth                            | Byrne, David; Wild, David            | David Byrne           | tt0109253 |
| 1746409338 | 1987 | 1987 | Hour of the Assassin                              | Hour of the Assassin                         | Llosa, Luis                          | Luis Llosa            | tt0093219 |
| 1746422534 | 1996 | 1996 | Personal Belongings                               | Personal Belongings                          | Bognar, Steven                       | Steven Bognar         | tt0177103 |
| 1745293743 | 2004 | 2003 | Chooch                                            | Chooch                                       | Nirmalakhandan, Rajeev ; Bari, J. C. | J.C. Bari             | tt0369330 |
| 1745302322 | 2005 | 2004 | America Brown                                     | America Brown                                | Black, Paul                          | Paul Black            | tt0374496 |
| 1746408712 | 1984 | 1984 | Hardbodies                                        | Hardbodies                                   | Griffiths, Mark                      | Mark Griffiths        | tt0087385 |
| 1746394708 | 1984 | 1984 | Kid Gloves                                        | Kid Gloves                                   | DiPersio, Vince                      | Vince DiPersio        | tt0430270 |
| 1746197935 | 1970 | 1970 | Tiger by the Tail                                 | Tiger by the Tail                            | Springsteen, R. G.                   | R.G. Springsteen      | tt0063696 |
| 1746408834 | 1991 | 1991 | Dutch                                             | Dutch                                        | Faiman, Peter                        | Peter Faiman          | tt0101786 |
| 1746235391 | 1971 | 1971 | Okay, Bill                                        | Okay Bill                                    | Avildsen, John G.                    | John G. Avildsen      | tt0067521 |
| 1746219356 | 1972 | 1972 | Child's Play                                      | Child's Play                                 | Lumet, Sidney                        | Sidney Lumet          | tt0068369 |
| 1745322671 | 2006 | 2006 | I Trust You to Kill Me                            | I Trust You to Kill Me                       | Boyer, Manu                          | Manu Boyer            | tt0800081 |
| 1745340095 | 2002 | 2002 | Derrida                                           | Derrida                                      | Dick, Kirby; Kofman, Amy Ziering     | Kirby Dick            | tt0303326 |
| 1746409347 | 1990 | 1989 | Wild Orchid                                       | Wild Orchid                                  | King, Zalman                         | Zalman King           | tt0100934 |
| 1746419185 | 1989 | 1989 | Listen to Me                                      | Listen to Me                                 | Stewart, Douglas Day                 | Douglas Day Stewart   | tt0097756 |
| 1746235823 | 1974 | 1974 | UFO: Target Earth                                 | UFO: Target Earth                            | de Gaetano, Michael A.               | Michael A. DeGaetano  | tt0131624 |
| 1746218886 | 1974 | 1974 | Lost in the Stars                                 | Lost in the Stars                            | Mann, Daniel                         | Daniel Mann           | tt0071773 |
| 1769976702 | 1974 | 1974 | Inside Amy                                        | Inside Amy                                   | Garcia, Ronald V.                    | Ronald Víctor García  | tt0128673 |
| 1746393373 | 1988 | 1987 | A Tiger's Tale                                    | A Tiger's Tale                               | Douglas, Peter                       | Peter Douglas         | tt0094148 |
| 1746219023 | 1974 | 1974 | Sing Sing Thanksgiving                            | Sing Sing Thanksgiving                       | Hoffman, David; Wiland, Harry        | David Hoffman         | tt0072168 |
| 1745339989 | 2002 | 2002 | Choice of Weapons                                 | Choice of Weapons                            | Dalrymple, Christopher               | Christopher Dalrymple | tt0326804 |
| 1745342616 | 2009 | 2009 | American Casino                                   | American Casino                              | Cockburn, Leslie                     | Leslie Cockburn       | tt1396209 |
| 1746210562 | 1971 | 1970 | Maidstone                                         | Maidstone                                    | Mailer, Norman                       | Norman Mailer         | tt0064625 |
| 1746250222 | 1979 | 1978 | Once in Paris...                                  | Once in Paris...                             | Gilroy, Frank D.                     | Frank D. Gilroy       | tt0078029 |
| 1745342030 | 2008 | 2007 | Paranoid Park                                     | Paranoid Park                                | Van Sant, Gus                        | Gus Van Sant          | tt0842929 |
| 1746273982 | 1978 | 1978 | Youngblood                                        | Youngblood                                   | Nosseck, Noel                        | Noel Nosseck          | tt0181907 |
| 1746455267 | 1998 | 1998 | Reach the Rock                                    | Reach the Rock                               | Ryan, William                        | Bill Ryan             | tt0119986 |
| 1745341797 | 2009 | 2009 | The Box                                           | The Box                                      | Kelly, Richard                       | Gary Lamb             | tt1419384 |
| 1746258038 | 1975 | 1975 | Give 'em Hell, Harry!                             | Give 'em Hell, Harry!                        | Binder, Steve; Hunt, Peter H.        | Steve Binder          | tt0073053 |
| 1746420140 | 1986 | 1986 | Shadow Play                                       | Shadow Play                                  | Shadburne, Susan                     | Susan Shadburne       | tt0091931 |
| 1745357733 | 2004 | 2004 | Silver City                                       | Silver City                                  | Sayles, John                         | John Sayles           | tt0376890 |
| 1746409966 | 1981 | 1981 | Rollover                                          | Rollover                                     | Pakula, Alan J.                      | Alan J. Pakula        | tt0083006 |
| 1746436901 | 2000 | 2000 | The Little Vampire                                | The Little Vampire                           | Edel, Uli                            | Uli Edel              | tt0192255 |
| 1746438724 | 1996 | 1996 | The Leopard Son                                   | The Leopard Son                              | Van Lawick, Hugo                     | Hugo Van Lawick       | tt0116859 |
| 1745309477 | 2007 | 2007 | Body of War                                       | Body of War                                  | Spiro, Ellen ; Donahue, Phil         | Phil Donahue          | tt1068634 |
| 1746435833 | 1989 | 1989 | Loverboy                                          | Loverboy                                     | Micklin Silver, Joan                 | Joan Micklin Silver   | tt0097790 |
| 1746422269 | 1999 | 1999 | Bloodshed & Emeralds                              | Bloodshed and Emeralds                       | Wells, Jodi Ann                      | Ann Cochran           | tt2318409 |
| 1745272762 | 2001 | 2001 | Anacardium                                        | Anacardium                                   | Thomas, Scott                        | Scott Thomas          | tt0303648 |
| 1746434934 | 1990 | 1989 | Twister                                           | Twister                                      | Almeryda, Michael                    | Michael Almeryda      | tt0096321 |
| 1745372400 | 2010 | 2010 | Somewhere                                         | Somewhere                                    | Coppola, Sofia                       | Sofia Coppola         | tt1421051 |
| 1745359540 | 2011 | 2010 | The Grace Card                                    | The Grace Card                               | Evans, David G.                      | David G. Evans        | tt1544600 |
| 1746235386 | 1977 | 1977 | Brothers                                          | Brothers                                     | Barron, Arthur                       | Arthur Barron         | tt0075787 |
| 1746410403 | 1985 | 1985 | Red Sonja                                         | Red Sonja                                    | Fleischer, Richard                   | Richard Fleischer     | tt0089893 |
| 1745272100 | 2000 | 1999 | Chutney Popcorn                                   | Chutney Popcorn                              | Ganatra, Nisha                       | Nisha Ganatra         | tt0126240 |
| 1746393961 | 1990 | 1990 | Love at Large                                     | Love at Large                                | Rudolph, Alan                        | Alan Rudolph          | tt0100065 |
| 1746235375 | 1977 | 1977 | Herowork                                          | Herowork                                     | Adrian, Michael                      | Michael Adrian        | tt0159474 |
| 1746186095 | 1970 | 1970 | Paradise Now                                      | Paradise Now                                 | Rochlin, Sheldon                     | Sheldon Rochlin       | tt0235658 |
| 1746420400 | 1991 | 1991 | Deceived                                          | Deceived                                     | Harris, Damian                       | Damian Harris         | tt0101694 |
| 1746257167 | 1975 | 1975 | Have a Nice Weekend                               | Have a Nice Weekend                          | Walters, Michael                     | Michael Walters       | tt0219076 |

|            |      |      |                                                     |                                                |                                    |                       |           |
|------------|------|------|-----------------------------------------------------|------------------------------------------------|------------------------------------|-----------------------|-----------|
| 1745359972 | 2003 | 2002 | Civil Brand                                         | Civil Brand                                    | Barnette, Neema                    | Neema Barnette        | tt0326806 |
| 1746435917 | 1997 | 1996 | Butch Camp                                          | Butch Camp                                     | De Gaetano, Allesandro             | Alessandro De Gaetano | tt0122417 |
| 1746258873 | 1979 | 1979 | Love and Bullets                                    | Love and Bullets                               | Rosenberg, Stuart                  | Stuart Rosenberg      | tt0079488 |
| 1746455096 | 1996 | 1996 | Kansas City                                         | Kansas City                                    | Altman, Robert                     | Robert Altman         | tt0116745 |
| 1745375303 | 2010 | 2010 | Hereafter                                           | Hereafter                                      | Eastwood, Clint                    | Clint Eastwood        | tt1212419 |
| 1745342521 | 2008 | 2008 | Quarantine                                          | Quarantine                                     | Dowdle, John Erick                 | John Erick Dowdle     | tt1082868 |
| 1745302692 | 2007 | 2007 | Broken                                              | Broken                                         | White, Alan                        | David DeLeon          | tt1079348 |
| 1746218875 | 1971 | 1971 | Angels Hard as They Come                            | Angels Hard as They Come                       | Viola, Joe                         | Joe Viola             | tt0066771 |
| 1746439450 | 1998 | 1997 | Deceiver                                            | Deceiver                                       | Pate, Jonas; Pate, Joshua          | Jonas Pate            | tt0119527 |
| 1746453656 | 1996 | 1996 | Solo                                                | Solo                                           | Barba, Norberto                    | Norberto Barba        | tt0117688 |
| 1745374108 | 2010 | 2010 | Celine: Through the Eyes of the World               | Celine: Through the Eyes of the World          | Laporte, Stephane                  | Stéphane Laporte      | tt1570982 |
| 1746500164 | 1924 | 1924 | The Trail of Vengeance                              | The Trail of Vengeance                         | Ferguson, Al                       | Al Ferguson           | tt0173347 |
| 1746520351 | 1924 | 1923 | Hearts of Oak                                       | Hearts of Oak                                  | Ford, John                         | Duke Worne            | tt0325543 |
| 1746409032 | 1982 | 1982 | Forbidden World                                     | Forbidden World                                | Holzman, Allan                     | Allan Holzman         | tt0083959 |
| 1745374983 | 2008 | 2008 | Good                                                | Goods                                          | Amorim, Vicente                    | Edd Blott             | tt1455020 |
| 1745293834 | 2006 | 2005 | That Man: Peter Berlin                              | That Man: Peter Berlin                         | Tushinski, Jim                     | Jim Tushinski         | tt0450334 |
| 1746581124 | 1951 | 1951 | Northwest Territory                                 | Northwest Territory                            | McDonald, Frank                    | Frank McDonald        | tt0043864 |
| 1746500589 | 1950 | 1950 | Border Treasure                                     | Border Treasure                                | Archainbaud, George                | George Archainbaud    | tt0042273 |
| 1746578712 | 1950 | 1950 | Over the Border                                     | Over the Border                                | Fox, Wallace W.                    | Wallace Fox           | tt0042827 |
| 1746577388 | 1950 | 1950 | King Solomon's Mines                                | King Solomon's Mines                           | Bennett, Compton; Marton, Andrew   | Compton Bennett       | tt0042646 |
| 1746577116 | 1950 | 1950 | Rookie Fireman                                      | Rookie Fireman                                 | Friedman, Seymour                  | Seymour Friedman      | tt0178005 |
| 1746235212 | 1971 | 1971 | The Lexington Experience                            | The Lexington Experience                       | Schiller, Lawrence                 | Lawrence Schiller     | tt0818856 |
| 1769973334 | 1970 | 1970 | Horn-a-Plenty                                       | Horn a Plenty                                  |                                    | Joseph W. Sarno       | tt0219810 |
| 1746202588 | 1970 | 1970 | Bloodthirsty Butchers                               | Bloodthirsty Butchers                          | Milligan, Andy                     | Andy Milligan         | tt0065480 |
| 1746200506 | 1969 | 1969 | The Walls Have Eyes                                 | The Walls Have Eyes                            |                                    | Steve Hawkes          | tt0190125 |
| 1746408840 | 1990 | 1990 | Blood Salvage                                       | Blood Salvage                                  | Johnston, Tucker                   | Tucker Johnston       | tt0099153 |
| 1746409432 | 1990 | 1990 | To Sleep with Anger                                 | To Sleep with Anger                            | Burnett, Charles                   | Charles Burnett       | tt0100791 |
| 1746435027 | 1996 | 1996 | The Last Supper                                     | The Last Supper                                | Title, Stacy                       | Gabriel Judet         | tt0360736 |
| 1745359946 | 2002 | 2001 | Lansdown                                            | Lansdown                                       | Zuber, Tom                         | Tom Zuber             | tt0255312 |
| 1746218671 | 1972 | 1972 | Premonition                                         | Premonition                                    | Rudolph, Alan                      | Alan Rudolph          | tt0069118 |
| 1745282620 | 2007 | 2008 | The Business of Being Born                          | The Business of Being Born                     | Epstein, Abby                      | Abby Epstein          | tt0995061 |
| 1746211264 | 1971 | 1971 | You've Got to Walk It Like You Talk It Or You'll Lo | You've Got to Walk It Like You Talk It or You' | Locke, Peter                       | Peter Locke           | tt0068006 |
| 1746409333 | 1985 | 1985 | Baby: Secret of the Lost Legend                     | Baby: Secret of the Lost Legend                | Norton, B. W. L.                   | Bill Norton           | tt0088760 |
| 1745293885 | 2007 | 2007 | Operation Homecoming: Writing the Wartime E         | Operation Homecoming: Writing the Wartime      | Robbins, Richard E.                | Richard Robbins       | tt0970184 |
| 1746394469 | 1987 | 1987 | The Kindred                                         | The Kindred                                    | Obrow, Jeffrey; Carpenter, Stephen | Stephen Carpenter     | tt0091343 |
| 1746257681 | 1977 | 1977 | The Serpent's Egg                                   | The Serpent's Egg                              | Bergman, Ingmar                    | Ingmar Bergman        | tt0076686 |
| 1746438686 | 1996 | 1996 | Basquiat                                            | Basquiat                                       | Schnabel, Julian                   | Julian Schnabel       | tt0115632 |
| 1746219410 | 1971 | 1971 | Happy Birthday, Wanda June                          | Happy Birthday, Wanda June                     | Robson, Mark                       | Mark Robson           | tt0067180 |
| 1746409289 | 1991 | 1991 | Liebestraum                                         | Liebestraum                                    | Figgis, Mike                       | Mike Figgis           | tt0102299 |
| 1746274138 | 1980 | 1980 | Agee                                                | Agee                                           | Spears, Ross                       | Ross Spears           | tt0080337 |
| 1746440026 | 1998 | 1997 | Shopping for Fangs                                  | Shopping for Fangs                             | Lee, Quentin ; Lin, Justin         | Quentin Lee           | tt0122710 |
| 1745373163 | 2008 | 2008 | The First Basket                                    | The First Basket                               | Vyorst, David                      | David Vyorst          | tt1171238 |
| 1746455801 | 2000 | 2000 | American Babylon                                    | American Babylon                               | Stone, Robert                      | Robert Stone          | tt0250953 |
| 1746409044 | 1985 | 1985 | Bring on the Night                                  | Bring on the Night                             | Apted, Michael                     | Michael Apted         | tt0088855 |
| 1746211052 | 1973 | 1973 | Doctor Death: Seeker of Souls                       | Doctor Death: Seeker of Souls                  | Saeta, Eddie                       | Eddie Saeta           | tt0070001 |
| 1746409799 | 1985 | 1985 | Key Exchange                                        | Key Exchange                                   | Kellman, Barnet                    | Barnet Kellman        | tt0089411 |
| 1746408853 | 1984 | 1984 | Hollywood Hot Tubs                                  | Hollywood Hot Tubs                             | Vincent, Chuck                     | Chuck Vincent         | tt0087418 |
| 1746218874 | 1979 | 1979 | Winter Kills                                        | Winter Kills                                   | Richert, William                   | William Richert       | tt0080139 |
| 1745373721 | 2009 | 2008 | Tyson                                               | Tyson                                          | Toback, James                      | James Toback          | tt1032821 |
| 1746410462 | 1986 | 1986 | Hardbodies 2                                        | Hardbodies 2                                   | Griffiths, Mark                    | Mark Griffiths        | tt0091173 |
| 1746394233 | 1985 | 1985 | Out of Control                                      | Out of Control                                 | Holzman, Allan                     | Allan Holzman         | tt0089756 |
| 1745293872 | 2007 | 2007 | Dirty Laundry                                       | Dirty Laundry                                  | Jamal, Maurice                     | Logan Smith           | tt3662670 |
| 1745342327 | 2002 | 2001 | Big Bad Love                                        | Big Bad Love                                   | Howard, Arliss                     | Arliss Howard         | tt0260746 |
| 1745302886 | 2006 | 2006 | Beyond Conviction                                   | Beyond Conviction                              | Libert, Rachel                     | Rachel Libert         | tt0823195 |
| 1746392942 | 1985 | 1985 | Torchlight                                          | Torchlight                                     | Wright, Tom                        | Thomas J. Wright      | tt0088287 |
| 1746210624 | 1970 | 1970 | Night of the Witches                                | Night of the Witches                           | Burt, Keith Erik                   | Keith Larsen          | tt0066145 |
| 1745282880 | 2005 | 2005 | Nobody Wants Your Film                              | Nobody Wants Your Film                         | Judson, Peter                      | Peter Judson          | tt0459660 |

|            |      |      |                                                    |                                                    |                                 |                             |           |
|------------|------|------|----------------------------------------------------|----------------------------------------------------|---------------------------------|-----------------------------|-----------|
| 1746435404 | 1996 | 1996 | The Shot                                           | The Shot                                           | Bell, Dan                       | Dan Bell                    | tt0117638 |
| 1746421671 | 1998 | 1998 | The Decline of Western Civilization Part III       | The Decline of Western Civilization Part III       | Spheeris, Penelope              | Penelope Spheeris           | tt0138393 |
| 1746409497 | 1985 | 1986 | Unfinished Business                                | Unfinished Business                                | Okazaki, Steven                 | Steven Okazaki              | tt0092136 |
| 1746433535 | 1999 | 1999 | Virtue                                             | Virtue                                             | Camera Obscura                  | Camera Obscura              | tt0230953 |
| 1746410013 | 1990 | 1989 | Happy Together                                     | Happy Together                                     | Damski, Mel                     | Mel Damski                  | tt0097478 |
| 1746235355 | 1972 | 1972 | Sounder                                            | Sounder                                            | Ritt, Martin                    | Martin Ritt                 | tt0069303 |
| 1745374338 | 2009 | 2008 | Every Little Step                                  | Every Little Step                                  | Stern, James D. ; Del Deo, Adam | Adam Del Deo                | tt0977648 |
| 1745359286 | 2010 | 2010 | Conviction                                         | Conviction                                         | Goldwyn, Tony                   | Tony Goldwyn                | tt1244754 |
| 1746408429 | 1988 | 1988 | Call Me                                            | Call Me                                            | Mitchell, Sollace               | Sollace Mitchell            | tt0094827 |
| 1745293458 | 2006 | 2006 | Psychopathia Sexualis                              | Psychopathia Sexualis                              | Wood, Bret                      | Bret Wood                   | tt0419081 |
| 1746419773 | 1983 | 1983 | Exposed                                            | Exposed                                            | Toback, James                   | James Toback                | tt0085513 |
| 1746209907 | 1970 | 1970 | Halls of Anger                                     | Halls of Anger                                     | Bogart, Paul                    | Paul Bogart                 | tt0065810 |
| 1746408438 | 1985 | 1985 | The Falcon and the Snowman                         | The Falcon and the Snowman                         | Schlesinger, John               | John Schlesinger            | tt0087231 |
| 1746210237 | 1971 | 1971 | Brother John                                       | Brother John                                       | Goldstone, James                | James Goldstone             | tt0068317 |
| 1745302367 | 2007 | 2007 | Grace Is Gone                                      | Grace Is Gone                                      | Strouse, James C.               | Jim Strouse                 | tt0772168 |
| 1746202967 | 1970 | 1970 | Gabrielle                                          | Gabrielle                                          | Shiffen, Arlo                   | Ron Wertheim                | tt0218997 |
| 1746410571 | 1987 | 1986 | Body Slam                                          | Body Slam                                          | Needham, Hal                    | Hal Needham                 | tt0092684 |
| 1746210457 | 1972 | 1972 | Black Fantasy                                      | Black Fantasy                                      | Rogosin, Lionel                 | Lionel Rogosin              | tt0177539 |
| 1745309304 | 2004 | 2003 | Tom Dowd & the Language of Music                   | Tom Dowd & the Language of Music                   | Moormann, Mark                  | Mark Moormann               | tt0343107 |
| 1745359012 | 2002 | 2001 | Daydream Believer                                  | Daydream Believer                                  | Eisenstadt, Debra               | Debra Eisenstadt            | tt0276050 |
| 1746394672 | 1985 | 1985 | Transylvania 6-5000                                | Transylvania 6 5000                                | DeLuca, Rudy                    | Rudy De Luca                | tt0090196 |
| 1746408847 | 1987 | 1987 | Amazing Grace and Chuck                            | Amazing Grace and Chuck                            | Newell, Mike                    | Mike Newell                 | tt0092545 |
| 1746235616 | 1973 | 1973 | Little Laura & Big John                            | Little Laura and Big John                          | Moberly, Luke; Woodburn, Bob    | Luke Moberly                | tt0070325 |
| 1745271724 | 2000 | 2000 | Angel's Ladies                                     | Angel's Ladies                                     | Lindeman, Doug                  | Doug Lindeman               | tt0267260 |
| 1746409248 | 1988 | 1988 | Apprentice to Murder                               | Apprentice to Murder                               | Thomas, R. L.                   | Ralph L. Thomas             | tt0094671 |
| 1746410641 | 1987 | 1987 | My Demon Lover                                     | My Demon Lover                                     | Loventhal, Charles              | Charlie Loventhal           | tt0093589 |
| 1745341589 | 2010 | 2009 | Lucky Days                                         | Lucky Day                                          | Torn, Angelica; Torn, Tony      | Alex Goyette                | tt1560693 |
| 1746218790 | 1972 | 1972 | The Class of '74                                   | Class of '74                                       | Marks, Arthur; Bing, Mack       | Mack Bing                   | tt3311950 |
| 1746409928 | 1986 | 1986 | Crimes of the Heart                                | Crimes of the Heart                                | Beresford, Bruce                | Bruce Beresford             | tt0090886 |
| 1745342288 | 2010 | 2009 | The Cartel                                         | Carter                                             | Bowdon, Bob                     | Christopher Affonco Bradley | tt1546789 |
| 1746408845 | 1981 | 1981 | King of the Mountain                               | King of the Mountain                               | Nosseck, Noel                   | Noel Nosseck                | tt0082619 |
| 1746421328 | 1994 | 1994 | Brainscan                                          | Brainscan                                          | Flynn, John                     | John Flynn                  | tt0109327 |
| 1746409760 | 1989 | 1989 | Crack House                                        | Crack House                                        | Fischa, Michael                 | Michael Fischa              | tt0097119 |
| 1745372664 | 2009 | 2009 | Rethink Afghanistan                                | Rethink Afghanistan                                | Greenwald, Robert               | Robert Greenwald            | tt1572167 |
| 1746218830 | 1973 | 1973 | The Innerview                                      | The Innerview                                      | Beymer, Richard                 | Richard Beymer              | tt0226836 |
| 1745272597 | 2000 | 2000 | Superstar Female Serial Killer                     | Superstar Female Serial Killer                     | Morrissey, Chris                | Chris Morrissey             | tt0238639 |
| 1746249961 | 1975 | 1975 | The Outer Space Connection                         | The Outer Space Connection                         | Warshofsky, Fred                | Fred Warshofsky             | tt0163783 |
| 1745282847 | 2007 | 2006 | Splinter                                           | Splinter                                           | Olmos, Michael D.               | Michael D. Olmos            | tt0429115 |
| 1745282634 | 2006 | 2005 | Conventioneers                                     | Conventioneers                                     | Stephens, Mora                  | Mora Stephens               | tt0455929 |
| 1746419792 | 1983 | 1983 | Nate and Hayes                                     | Nate and Hayes                                     | Fairfax, Ferdinand              | Ferdinand Fairfax           | tt0085994 |
| 1746210602 | 1973 | 1972 | Film Portrait                                      | Film Portrait                                      | Hill, Jerome                    | Jerome Hill                 | tt0068585 |
| 1746420796 | 1997 | 1997 | Frank Capra's American Dream                       | Frank Capra's American Dream                       | Bowser, Kenneth                 | Kenneth Bowser              | tt0119147 |
| 1745357929 | 2009 | 2008 | Chelsea on the Rocks                               | Chelsea on the Rocks                               | Ferrara, Abel                   | Abel Ferrara                | tt1134665 |
| 1746410742 | 1994 | 1994 | White Fang 2: Myth of the White Wolf               | White Fang 2: Myth of the White Wolf               | Olin, Ken                       | Ken Olin                    | tt0111701 |
| 1746423297 | 1992 | 1992 | Liberators: Fighting on Two Fronts in World War II | Liberators: Fighting on Two Fronts in World War II | Miles, William; Rosenblum, Nina | William Miles               | tt0104721 |
| 1745342448 | 2004 | 2004 | Lightning in a Bottle                              | Lightning in a Bottle                              | Fuqua, Antoine                  | Antoine Fuqua               | tt0396705 |
| 1746219104 | 1974 | 1974 | McQ                                                | McQ                                                | Sturges, John                   | John Sturges                | tt0071824 |
| 1746455706 | 1999 | 1999 | Brokedown Palace                                   | Brokedown Palace                                   | Kaplan, Jonathan                | Jonathan Kaplan             | tt0120620 |
| 1745342762 | 2009 | 2008 | Enlighten Up!                                      | Enlighten Up!                                      | Churchill, Kate                 | Kate Churchill              | tt1306972 |
| 1746408432 | 1986 | 1986 | The Perils of P. K.                                | The Perils of P. K.                                | Green, Joseph                   | Joseph Green                | tt0091748 |
| 1746419194 | 1986 | 1986 | Low Blow                                           | Low Blow                                           | Harris, Frank                   | Frank Harris                | tt0091442 |
| 1746420548 | 1992 | 1993 | Where Are We? Our Trip Through America             | Where Are We? Our Trip Through America             | Friedman, Jeffrey; Epstein, Rob | Rob Epstein                 | tt0105808 |
| 1746218763 | 1974 | 1974 | Funny Car Summer                                   | Funny Car Summer                                   | Phillips, Ron                   | Ron Phillips                | tt0277714 |
| 1745332197 | 2011 | 2010 | Seducing Charlie Barker                            | Seducing Charlie Barker                            | Glazer, Amy                     | Amy Glazer                  | tt1539017 |
| 1746410423 | 1993 | 1993 | The Adventures of Huck Finn                        | The Adventures of Huck Finn                        | Sommers, Stephen                | Stephen Sommers             | tt0106223 |
| 1746219615 | 1979 | 1979 | Quintet                                            | Quintet                                            | Altman, Robert                  | Robert Altman               | tt0079770 |
| 1745373075 | 2011 | 2010 | Monogamy                                           | Monogamy                                           | Shapiro, Dana Adam              | Dana Adam Shapiro           | tt1502714 |

|            |      |      |                                               |                                           |                      |                     |           |
|------------|------|------|-----------------------------------------------|-------------------------------------------|----------------------|---------------------|-----------|
| 1746219348 | 1978 | 1978 | Goin' Coconuts                                | Goin' Coconuts                            | Morris, Howard       | Howard Morris       | tt0077620 |
| 1745372406 | 2002 | 2002 | Boxhead Revolution                            | Box Head Revolution                       | Christensen, Mark    | Mark Christensen    | tt0328905 |
| 1746219741 | 1974 | 1974 | Our Time                                      | Our Time                                  | Hyams, Peter         | Peter Hyams         | tt0071959 |
| 1745342831 | 2009 | 2008 | The Blue Tooth Virgin                         | The Blue Tooth Virgin                     | Brown, Russell       | Russell Brown       | tt1235058 |
| 1745302763 | 2007 | 2007 | Shooter                                       | Shooter                                   | Fuqua, Antoine       | Dennis J. Burgin    | tt1202755 |
| 1745373720 | 2003 | 2003 | Claustrophobia                                | Claustrophobia                            | Kines, Mark Tapio    | Mark Tapio Kines    | tt0315411 |
| 1746235344 | 1971 | 1971 | The Peace Killers                             | The Peace Killers                         | Schwartz, Douglas    | Douglas Schwartz    | tt0067559 |
| 1745271851 | 2000 | 2000 | Always a Bridesmaid                           | Always a Bridesmaid                       | Davenport, Nina      | Nina Davenport      | tt0296502 |
| 1746393282 | 1984 | 1984 | American Dreamer                              | American Dreamer                          | Rosenthal, Rick      | Rick Rosenthal      | tt0086886 |
| 1746235770 | 1974 | 1974 | The Black Windmill                            | The Black Windmill                        | Siegel, Don          | Don Siegel          | tt0071229 |
| 1745359023 | 2009 | 2009 | Alexander the Last                            | Alexander the Last                        | Swanberg, Joe        | Joe Swanberg        | tt1308094 |
| 1745394344 | 2010 | 2009 | Toe to Toe                                    | Toe to Toe                                | Abt, Emily           | Emily Abt           | tt1209364 |
| 1745373908 | 2011 | 2010 | Daylight                                      | Daylight                                  | Barker, David        | David Barker        | tt1254978 |
| 1746455971 | 1998 | 1998 | Tarzan and the Lost City                      | Tarzan and the Lost City                  | Schenkel, Carl       | Carl Schenkel       | tt0120856 |
| 1745342509 | 2008 | 2007 | Funny Games                                   | Funny Games                               | Haneke, Michael      | Michael Haneke      | tt0808279 |
| 1745303205 | 2006 | 2006 | Brick                                         | Prick                                     | Johnson, Rian        | Daniel Rigdon       | tt0897382 |
| 1746410816 | 1989 | 1989 | True Blood                                    | True Blood                                | Kerr, Frank          | Frank Kerr          | tt0098525 |
| 1745359017 | 2010 | 2010 | Boxing Gym                                    | Boxing Gym                                | Wiseman, Frederick   | Frederick Wiseman   | tt1653827 |
| 1746422209 | 1992 | 1992 | Ruby                                          | Ruby                                      | Mackenzie, John      | John Mackenzie      | tt0105291 |
| 1746235742 | 1973 | 1972 | The Circle                                    | The Circle                                | Moyer, Tom           | Tom Moyer Jr.       | tt3616886 |
| 1745374580 | 2009 | 2009 | Next Day Air                                  | Next Day Air                              | Boom, Benny          | Benny Boom          | tt1097013 |
| 1746256634 | 1975 | 1975 | Rancho Deluxe                                 | Rancho Deluxe                             | Perry, Frank         | Frank Perry         | tt0073605 |
| 1745342190 | 2010 | 2010 | The Tempest                                   | The Tempest                               | Taymor, Julie        | Julie Taymor        | tt1274300 |
| 1746210960 | 1970 | 1970 | a. k. a. Cassius Clay                         | a. k. a. Cassius Clay                     | Jacobs, Jim          | Jim Jacobs          | tt0181275 |
| 1746419803 | 1986 | 1986 | Streets of Gold                               | Streets of Gold                           | Roth, Joe            | Joe Roth            | tt0092022 |
| 1746257189 | 1980 | 1980 | The Idolmaker                                 | The Idolmaker                             | Hackford, Taylor     | Taylor Hackford     | tt0080913 |
| 1745359628 | 2003 | 2003 | Jersey Guy                                    | Jersey Guy                                | Zois, Elia           | Elia Zois           | tt0191211 |
| 1745293319 | 2006 | 2006 | Sun Kissed                                    | Sun Kissed                                | McGuinn, Patrick     | Patrick McGuinn     | tt0807767 |
| 1746219590 | 1971 | 1971 | The Hired Hand                                | The Hired Hand                            | Fonda, Peter         | Peter Fonda         | tt0067204 |
| 1746211272 | 1970 | 1970 | The Private Life of Sherlock Holmes           | The Private Life of Sherlock Holmes       | Wilder, Billy        | Billy Wilder        | tt0066249 |
| 1746218740 | 1975 | 1975 | Foreplay                                      | Foreplay                                  |                      | John G. Avildsen    | tt0073006 |
| 1746420509 | 1986 | 1986 | 'night, Mother                                | 'night, Mother                            | Moore, Tom           | Tom Moore           | tt0090556 |
| 1745374005 | 2008 | 2008 | Allah Made Me Funny: Live in Concert          | Allah Made Me Funny: Live in Concert      | Kalin, Andrea        | Andrea Kalin        | tt1285252 |
| 1746250142 | 1978 | 1978 | Uncle Joe Shannon                             | Uncle Joe Shannon                         | Hanwright, Joseph C. | Joseph C. Hanwright | tt0078442 |
| 1746393707 | 1987 | 1987 | Obsessions                                    | Obsessions                                | Eleasari, Jacob      | Jacob Eleasari      | tt0361969 |
| 1746202312 | 1970 | 1970 | Marsha, The Erotic Housewife                  | Marsha: The Erotic Housewife              | Davis, Don           | Donald A. Davis     | tt0143621 |
| 1746434352 | 1999 | 1999 | Me & Isaac Newton                             | Me & Isaac Newton                         | Apted, Michael       | Michael Apted       | tt0218433 |
| 1746235262 | 1972 | 1972 | Night Call Nurses                             | Night Call Nurses                         | Kaplan, Jonathan     | Jonathan Kaplan     | tt0069001 |
| 1745359636 | 2002 | 2002 | Imagining Robert: My Brother, Madness and Sur | Imagining Robert: My Brother, Madness and | Hott, Lawrence R.    | Lawrence R. Hott    | tt0330437 |
| 1746408668 | 1989 | 1988 | Under the Boardwalk                           | Under the Boardwalk                       | Kiersch, Fritz       | Fritz Kiersch       | tt0098557 |
| 1745272179 | 2000 | 2000 | A Good Baby                                   | A Good Baby                               | Dieckmann, Katherine | Katherine Dieckmann | tt0155723 |
| 1745293648 | 2007 | 2007 | Trigger Man                                   | Trigger Man                               | West, Ti             | Ti West             | tt0814365 |
| 1745359324 | 2010 | 2009 | To Save a Life                                | To Save a Life                            | Baugh, Brian         | Brian Baugh         | tt1270286 |
| 1745293538 | 2006 | 2005 | The Cabinet of Dr. Caligari                   | The Cabinet of Dr. Caligari               | Fisher, David Lee    | David Lee Fisher    | tt0441741 |
| 1745340474 | 2002 | 2002 | The Mesmerist                                 | The Mesmerist                             | Cates, Gil           | Gil Cates Jr.       | tt0272730 |
| 1746218716 | 1971 | 1971 | The Ski Bum                                   | The Ski Bum                               | Clark, Bruce         | Bruce D. Clark      | tt0067761 |
| 1746250852 | 1977 | 1977 | Rollercoaster                                 | Rollercoaster                             | Goldstone, James     | James Goldstone     | tt0076636 |
| 1745302949 | 2006 | 2005 | Hate Crime                                    | Hate Crime                                | Stovall, Tommy       | Tommy Stovall       | tt0415833 |
| 1745309422 | 2007 | 2006 | 10 Questions for the Dalai Lama               | 10 Questions for the Dalai Lama           | Ray, Rick            | Rick Ray            | tt0819354 |
| 1745309325 | 2007 | 2007 | The Inner Life of Martin Frost                | The Inner Life of Martin Frost            | Auster, Paul         | Paul Auster         | tt0479074 |
| 1745342761 | 2011 | 2010 | Florent: Queen of the Meat Market             | Florent: Queen of the Meat Market         | Sigal, David         | David Sigal         | tt1378667 |
| 1769973310 | 1970 | 1970 | Bunny & Clod                                  | Bunny and Clod                            |                      | Robert A. Poore     | tt0212014 |
| 1745272319 | 2000 | 2000 | The Price of Air                              | The Price of Air                          | Evans, Josh          | Josh Evans          | tt0261199 |
| 1746410144 | 1985 | 1985 | Missing in Action 2 The Beginning             | Missing in Action 2: The Beginning        | Hool, Lance          | Lance Hool          | tt0089604 |
| 1746202861 | 1970 | 1970 | Branches                                      | Branches                                  | Emshwiller, Ed       | Ed Emshwiller       | tt0177570 |
| 1746435322 | 1995 | 1994 | Fast Trip, Long Drop                          | Fast Trip, Long Drop                      | Bordowitz, Gregg     | Gregg Bordowitz     | tt0109774 |
| 1746219408 | 1971 | 1971 | Cycles South                                  | Cycles South                              | Marshall, Don        | Don Marshall        | tt0178360 |

|            |      |      |                                  |                                  |                     |                    |           |
|------------|------|------|----------------------------------|----------------------------------|---------------------|--------------------|-----------|
| 1746410201 | 1990 | 1990 | Alligator Eyes                   | Alligator Eyes                   | Feldman, John       | John Feldman       | tt0099017 |
| 1745357899 | 2002 | 2002 | Mr. Smith Gets a Hustler         | Mr. Smith Gets a Hustler         | McCrudden, Ian      | Ian McCrudden      | tt0298071 |
| 1746209985 | 1970 | 1970 | Diamond Stud                     | Diamond Stud                     | Corarito, Greg      | Greg Corarito      | tt0135911 |
| 1746436775 | 2000 | 1999 | Cotton Mary                      | Cotton Mary                      | Merchant, Ismail    | Ismail Merchant    | tt0159373 |
| 1746422235 | 1995 | 1995 | Moonlight and Valentino          | Moonlight and Valentino          | Anspaugh, David     | David Anspaugh     | tt0113851 |
| 1746256631 | 1976 | 1976 | Goin' Home                       | Goin' Home                       | Prentiss, Chris     | Chris Prentiss     | tt0074577 |
| 1746211083 | 1970 | 1970 | Love Me Like I Do                | Love Me Like I Do                | Van Hearn, J.       | Jean Van Hearn     | tt0066009 |
| 1746235789 | 1973 | 1973 | A Taste of Hell                  | A Taste of Hell                  | Bradbury, Basil     | Basil Bradbury     | tt0168210 |
| 1746433986 | 1998 | 1998 | Dancing at Lughnasa              | Dancing at Lughnasa              | O'Connor, Pat       | Pat O'Connor       | tt0120643 |
| 1745342872 | 2003 | 2002 | Anything But Love                | Anything But Love                | Cary, Robert        | Robert Cary        | tt0265803 |
| 1746235339 | 1976 | 1975 | Las Vegas Lady                   | Las Vegas Lady                   | Nosseck, Noel       | Noel Nosseck       | tt0074775 |
| 1745359398 | 2002 | 2001 | Margarita Happy Hour             | Margarita Happy Hour             | Chaiken, Ilya       | Ilya Chaiken       | tt0236474 |
| 1745359131 | 2002 | 2002 | Roger Dodger                     | Roger Dodger                     | Kidd, Dylan         | Dylan Kidd         | tt0299117 |
| 1746218694 | 1973 | 1973 | Running Wild                     | Running Wild                     | McCahon, Robert     | Robert McCahon     | tt0070616 |
| 1746218861 | 1973 | 1973 | The World's Greatest Athlete     | The World's Greatest Athlete     | Scheerer, Robert    | Robert Scheerer    | tt0070928 |
| 1746434250 | 1999 | 1999 | Believe                          | Believe                          | DePalma, Renee      | Renee De Palma     | tt0278972 |
| 1746257708 | 1975 | 1975 | The Reincarnation of Peter Proud | The Reincarnation of Peter Proud | Thompson, J. Lee    | J. Lee Thompson    | tt0073615 |
| 1746393317 | 1987 | 1987 | Hot Pursuit                      | Hot Pursuit                      | Lisberger, Steven   | Steven Lisberger   | tt0093215 |
| 1745293229 | 2004 | 2004 | Superbabies: Baby Geniuses 2     | Superbabies: Baby Geniuses 2     | Clark, Bob          | Bob Clark          | tt0270846 |
| 1746422230 | 1999 | 1999 | Suits                            | Suits                            | Weber, Eric         | Eric Weber         | tt0185711 |
| 1745339905 | 2004 | 2003 | Swing                            | Swing                            | Guigui, Martin      | Martin Guigui      | tt0358722 |
| 1745375124 | 2011 | 2010 | Lost Bohemia                     | Lost Bohemia                     | Astor, Josef        | Josef Astor        | tt1763245 |
| 1746410864 | 1993 | 1993 | Road Scholar                     | Road Scholar                     | Weisberg, Roger     | Roger Weisberg     | tt0107974 |
| 1745396045 | 2010 | 2009 | Princess Kaiulani                | Princess Kaiulani                | Forby, Marc         | Marc Forby         | tt1185344 |
| 1746420357 | 1987 | 1987 | Winners Take All                 | Winners Take All                 | Kiersch, Fritz      | Fritz Kiersch      | tt0092222 |
| 1745359870 | 2010 | 2010 | S&Man                            | The Sandman                      | Petty, J. T.        | Dave Scala         | tt1587351 |
| 1746420541 | 1989 | 1988 | Out of the Dark                  | Out of the Dark                  | Schroeder, Michael  | Michael Schroeder  | tt0095803 |
| 1746423740 | 1998 | 1997 | Still Breathing                  | Still Breathing                  | Robinson, James F.  | James F. Robinson  | tt0120211 |
| 1746218904 | 1972 | 1972 | Money Talks                      | Money Talks                      | Funt, Allen         | Allen Funt         | tt0185509 |
| 1746201205 | 1970 | 1970 | Zigzag                           | Zig Zag                          | Colla, Richard A.   | Richard A. Colla   | tt0066605 |
| 1746435005 | 1990 | 1990 | Young Guns II                    | Young Guns II                    | Murphy, Geoff       | Geoff Murphy       | tt0100994 |
| 1746235854 | 1973 | 1973 | The Baby                         | The Baby                         | Post, Ted           | Ted Post           | tt0069754 |
| 1746421661 | 2000 | 2000 | Civility                         | Civility                         | Cavaricci, Caesar   | Caesar Cavaricci   | tt0159396 |
| 1746259077 | 1975 | 1975 | Whiffs                           | Whiffs                           | Post, Ted           | Ted Post           | tt0073891 |
| 1745339942 | 2003 | 2002 | Luster                           | Luster                           | Lewis, Everett      | Everett Lewis      | tt0325761 |
| 1746454508 | 1998 | 1997 | Home Before Dark                 | Home Before Dark                 | Foley, Maureen      | Maureen Foley      | tt0116547 |
| 1746219575 | 1974 | 1974 | Huckleberry Finn                 | Huckleberry Finn                 | Thompson, J. Lee    | J. Lee Thompson    | tt0071634 |
| 1746410556 | 1982 | 1982 | Things Are Tough All Over        | Things Are Tough All Over        | Avildsen, Thomas K. | Thomas K. Avildsen | tt0084788 |
| 1746393001 | 1983 | 1983 | A Generation Apart               | A Generation Apart               | Fisher, Jack        | Jack Fisher        | tt0403060 |
| 1745393776 | 2011 | 2010 | The Best and the Brightest       | The Best and the Brightest       | Shelov, Josh        | Josh Shelov        | tt1438251 |
| 1746218754 | 1972 | 1972 | Man of La Mancha                 | Man of La Mancha                 | Hiller, Arthur      | Arthur Hiller      | tt0068909 |
| 1745394340 | 2010 | 2010 | Mars                             | Mars                             | Marslett, Geoff     | Alden Dalia        | tt1692873 |
| 1746249893 | 1977 | 1977 | Heroes                           | Foes                             | Kagan, Jeremy Paul  | John Coats         | tt0206754 |
| 1769974227 | 1970 | 1970 | Sweet Bird of Aquarius           | Sweet Bird of Aquarius           | Kerwin, Harry E.    | Harry Kerwin       | tt0066425 |
| 1746393209 | 1983 | 1983 | Blue Skies Again                 | Blue Skies Again                 | Michaels, Richard   | Richard Michaels   | tt0085254 |
| 1746422024 | 1995 | 1995 | Search & Destroy                 | Search and Destroy               | Salle, David        | David Salle        | tt0114371 |
| 1746251374 | 1977 | 1976 | Dogs                             | Dogs                             | Brinckerhoff, Burt  | Burt Brinckerhoff  | tt0074419 |
| 1745293496 | 2006 | 2006 | Stagedoor                        | Stagedoor                        | Shiva, Alexandra    | Alexandra Shiva    | tt0446788 |
| 1745302353 | 2005 | 2005 | Mrs. Henderson Presents          | Mrs Henderson Presents           | Frears, Stephen     | Stephen Frears     | tt0413015 |
| 1746394753 | 1991 | 1991 | Once Around                      | Once Around                      | Hallstrom, Lasse    | Lasse Hallström    | tt0102590 |
| 1746235471 | 1974 | 1974 | Black Eye                        | Black Eye                        | Arnold, Jack        | Jack Arnold        | tt0071224 |
| 1746423574 | 1992 | 1992 | Aces: Iron Eagle III             | Aces: Iron Eagle III             | Glen, John          | John Glen          | tt0103617 |
| 1746394033 | 1985 | 1985 | Twice in a Lifetime              | Twice in a Lifetime              | Yorkin, Bud         | Bud Yorkin         | tt0090223 |
| 1746422588 | 1991 | 1991 | Up Against the Wall              | Up Against the Wall              | O'Neal, Ron         | Ron O'Neal         | tt0103174 |
| 1745394528 | 2008 | 2007 | Chop Shop                        | Chop Shop                        | Bahrani, Ramin      | Ramin Bahrani      | tt0990404 |
| 1746249402 | 1977 | 1976 | In Search of Noah's Ark          | In Search of Noah's Ark          | Conway, James L.    | James L. Conway    | tt0076182 |
| 1745340087 | 2004 | 2004 | Undertow                         | Undertow                         | Green, David Gordon | David Gordon Green | tt0360130 |

|                   |             |             |                                                  |                                                  |                                     |                        |                  |
|-------------------|-------------|-------------|--------------------------------------------------|--------------------------------------------------|-------------------------------------|------------------------|------------------|
| 1745357618        | 2008        | 2008        | August                                           | August                                           | Chick, Austin                       | Austin Chick           | tt0470679        |
| 1746456042        | 1996        | 1996        | Flirting with Disaster                           | Flirting with Disaster                           | Russell, David O.                   | David O. Russell       | tt0116324        |
| 1746455157        | 1999        | 1999        | Mascara                                          | Mascara                                          | Kandel, Linda                       | Linda Kandel           | tt0188052        |
| 1746456077        | 1996        | 1996        | Everything Relative                              | Everything Relative                              | Pollack, Sharon                     | Sharon Pollack         | tt0116245        |
| 1745372681        | 2003        | 2003        | People Say I'm Crazy                             | People Say I'm Crazy                             | Cadigan, John                       | John Cadigan           | tt0379926        |
| 1745359382        | 2010        | 2010        | The Big Uneasy                                   | The Big Uneasy                                   | Shearer, Harry                      | Harry Shearer          | tt1702441        |
| 1745394534        | 2010        | 2010        | Dancing Across Borders                           | Dancing Across Borders                           | Bass, Anne                          | Anne Bass              | tt1433099        |
| 1746235569        | 1974        | 1974        | 'Gator Bait                                      | 'Gator Bait                                      | Sebastian, Ferd; Sebastian, Beverly | Beverly Sebastian      | tt0074080        |
| 1746393364        | 1986        | 1986        | Hard Traveling                                   | Hard Traveling                                   | Bessie, Dan                         | Dan Bessie             | tt0089255        |
| 1745303040        | 2005        | 2005        | Dangerous Men                                    | Dangerous Men                                    | Rad, John S.                        | Jahangir Salehi        | tt0489015        |
| 1746433994        | 2000        | 2000        | Benjamin Smoke                                   | Benjamin Smoke                                   | Cohen, Jem ; Sillen, Peter          | Jem Cohen              | tt0233315        |
| 1746234998        | 1972        | 1972        | They Only Kill Their Masters                     | They Only Kill Their Masters                     | Goldstone, James                    | James Goldstone        | tt0069371        |
| 1746420390        | 1994        | 1994        | A Million to Juan                                | A Million to Juan                                | Rodriguez, Paul                     | Paul Rodriguez         | tt0110518        |
| 1746433553        | 2000        | 2000        | Bounce: Behind the Velvet Rope                   | Bounce: Behind the Velvet Rope                   | Cantor, Steven                      | Steven Cantor          | tt0238066        |
| 1745374587        | 2010        | 2010        | Kenny Chesney: Summer in 3D                      | Kenny Chesney: Summer in 3D                      | Thomas, Joe                         | Joe Thomas             | tt1545098        |
| 1746410147        | 1992        | 1992        | Sarafina!                                        | Sarafina!                                        | Roodt, Darrell James                | Darrell Roodt          | tt0105316        |
| 1746409683        | 1985        | 1985        | The Gig                                          | The Gig                                          | Gilroy, Frank D.                    | Frank D. Gilroy        | tt0089203        |
| 1746219336        | 1971        | 1971        | The Last Run                                     | The Last Run                                     | Fleischer, Richard; Huston, John    | Richard Fleischer      | tt0067329        |
| 1746219687        | 1972        | 1972        | Eat the Document                                 | Eat the Document                                 | Pennebaker, D. A.; Alk, Howard      | Bob Dylan              | tt0233629        |
| 1745293165        | 2007        | 2006        | Hollywood Dreams                                 | Hollywood Dreams                                 | Jaglom, Henry                       | Henry Jaglom           | tt0431124        |
| 1746235617        | 1973        | 1972        | Imagine                                          | Imagine                                          | Lennon, John; Ono, Yoko             | Steve Gebhardt         | tt0172586        |
| 1745303193        | 2007        | 2006        | Mario's Story                                    | Mario's Story                                    | Werner, Jeff; Koch, Susan           | Susan Koch             | tt0824761        |
| 1746258727        | 1977        | 1977        | The Grateful Dead                                | The Grateful Dead                                |                                     | Jerry Garcia           | tt0076104        |
| 1745309482        | 2006        | 2006        | Heaven                                           | Heaven                                           | Flowers, Frank E.                   | Tal Unreich            | tt0869067        |
| 1746235061        | 1972        | 1972        | It Ain't Easy                                    | It Ain't Easy                                    | Hurley, Maury                       | Maurice Hurley         | tt0189615        |
| 1746219656        | 1971        | 1971        | Support Your Local Gunfighter                    | Support Your Local Gunfighter                    | Kennedy, Burt                       | Burt Kennedy           | tt0067809        |
| 1745293276        | 2006        | 2005        | Street Fight                                     | Street Fight                                     | Curry, Marshall                     | Marshall Curry         | tt0457496        |
| 1746235808        | 1974        | 1974        | 11 Harrowhouse                                   | 11 Harrowhouse                                   | Avakian, Aram                       | Aram Avakian           | tt0071080        |
| 1745309428        | 2005        | 2005        | The Ballad of Greenwich Village                  | The Ballad of Greenwich Village                  | Kramer, Karen                       | Karen Kramer           | tt0992904        |
| 1746438574        | 1995        | 1995        | A Reason to Believe                              | A Reason to Believe                              | Tirola, Douglas                     | Douglas Tirola         | tt0114240        |
| 1746435847        | 1992        | 1991        | The Lunatic                                      | The Lunatic                                      | Creme, Lol                          | Lol Creme              | tt0104777        |
| 1745372863        | 2003        | 2002        | Issues 101                                       | Issues 101                                       | Lincoln, John                       | John Lincoln           | tt0339209        |
| 1746210486        | 1972        | 1972        | The Jerusalem File                               | The Jerusalem File                               | Flynn, John                         | John Flynn             | tt0068763        |
| 1746257420        | 1977        | 1977        | Which Way Is Up?                                 | Which Way Is Up?                                 | Schultz, Michael                    | Michael Schultz        | tt0076913        |
| 1746409450        | 1986        | 1985        | Cocaine Wars                                     | Cocaine Wars                                     | Olivera, Hector                     | Héctor Olivera         | tt0090860        |
| 1745374405        | 2009        | 2009        | Peter and Vandy                                  | Peter and Vandy                                  | DiPietro, Jay                       | Jay DiPietro           | tt1144551        |
| 1746420864        | 1991        | 1990        | Goin' to Chicago                                 | Goin' to Chicago                                 | Leder, Paul                         | Paul Leder             | tt0187067        |
| 1745340109        | 2001        | 2001        | Jump Tomorrow                                    | Jump Tomorrow                                    | Hopkins, Joel                       | Joel Hopkins           | tt0273300        |
| 1745358036        | 2008        | 2008        | Trouble the Water                                | Trouble the Water                                | Lessin, Tia ; Deal, Carl            | Carl Deal              | tt1149405        |
| 1745294029        | 2007        | 2006        | Colma: The Musical                               | Colma: The Musical                               | Wong, Richard                       | Richard Wong           | tt0784977        |
| 1746393648        | 1983        | 1982        | Spring Fever                                     | Spring Fever                                     | Scanlan, Joseph L.                  | Joseph L. Scanlan      | tt0084718        |
| 1746393086        | 1983        | 1983        | Losin' It                                        | Losin' It                                        | Hanson, Curtis                      | Curtis Hanson          | tt0085868        |
| 1746410220        | 1988        | 1988        | The Perfect Match                                | The Perfect Match                                | Deimel, Mark                        | Mark Deimel            | tt0093717        |
| 1746419189        | 1987        | 1987        | Weeds                                            | Weeds                                            | Hancock, John                       | John D. Hancock        | tt0094304        |
| 1746211107        | 1972        | 1972        | The Twilight People                              | The Twilight People                              | Romero, Eddie                       | Eddie Romero           | tt0069426        |
| 1745358558        | 2009        | 2008        | Inkheart                                         | Inkheart                                         | Softley, Iain                       | Iain Softley           | tt0494238        |
| 1746419619        | 1992        | 1992        | Life on the Edge                                 | Life on the Edge                                 | Yates, Andrew                       | Andrew Yates           | tt0104728        |
| 1746410014        | 1983        | 1983        | The Big Score                                    | The Big Score                                    | Williamson, Fred                    | Fred Williamson        | tt0085245        |
| 1746218877        | 1973        | 1973        | Lolly-Madonna XXX                                | Lolly Madonna XXX                                | Sarafian, Richard C.                | Richard C. Sarafian    | tt0070332        |
| 1746235277        | 1976        | 1976        | Moving Violation                                 | Moving Violation                                 | Dubin, Charles S.                   | Charles S. Dubin       | tt0074924        |
| 1746393068        | 1986        | 1985        | Static                                           | Static                                           | Romanek, Mark                       | Mark Romanek           | tt0090069        |
| 1745271829        | 2000        | 2000        | Reckless Indifference                            | Reckless Indifference                            | Gazecki, William                    | William Gazecki        | tt0265633        |
| <b>1745393638</b> | <b>2009</b> | <b>2009</b> | <b>Jonas Brothers: The 3D Concert Experience</b> | <b>Jonas Brothers: The 3D Concert Experience</b> | <b>Hendricks, Bruce</b>             | <b>Bruce Hendricks</b> | <b>tt1229827</b> |
| 1746393511        | 1988        | 1988        | Lurkers                                          | Lurkers                                          | Findlay, Roberta                    | Roberta Findlay        | tt0095557        |
| 1745393804        | 2009        | 2009        | The September Issue                              | The September Issue                              | Cutler, R. J.                       | R.J. Cutler            | tt1331025        |
| 1745293255        | 2005        | 2005        | Ice Princess                                     | Ice Princess                                     | Fywell, Tim                         | Tim Fywell             | tt0396652        |
| 1745341780        | 2001        | 2001        | Life and Debt                                    | Life and Debt                                    | Black, Stephanie                    | Stephanie Black        | tt0284262        |



|            |      |      |                                   |                                   |                                  |                       |           |
|------------|------|------|-----------------------------------|-----------------------------------|----------------------------------|-----------------------|-----------|
| 1745340476 | 2002 | 2001 | Lovely & Amazing                  | Lovely & Amazing                  | Holofcener, Nicole               | Nicole Holofcener     | tt0258273 |
| 1745393735 | 2010 | 2010 | As Good As Dead                   | As Good as Dead                   | Mossek, Jonathan                 | Jonathan Mossek       | tt1294136 |
| 1746219047 | 1972 | 1972 | The Magnificent Seven Ride!       | The Magnificent Seven Ride!       | McCowan, George                  | George McCowan        | tt0068897 |
| 1745357956 | 2011 | 2010 | Cost of a Soul                    | Cost of a Soul                    | Kirkpatrick, Sean                | Sean Kirkpatrick      | tt1445729 |
| 1746235489 | 1977 | 1977 | The People That Time Forgot       | The People That Time Forgot       | Connor, Kevin                    | Kevin Connor          | tt0076535 |
| 1746437533 | 1999 | 1999 | Simpatico                         | Simpatico                         | Warchus, Matthew                 | Matthew Warchus       | tt0174204 |
| 1746419362 | 1988 | 1988 | Track 29                          | Track 29                          | Roeg, Nicolas                    | Nicolas Roeg          | tt0096294 |
| 1745282888 | 2006 | 2006 | How to Go Out on a Date in Queens | How to Go Out on a Date in Queens | Danner, Michelle                 | Michelle Danner       | tt0270417 |
| 1746219246 | 1972 | 1972 | Fuzz                              | Fuzz                              | Colla, Richard A.                | Richard A. Colla      | tt0068617 |
| 1746410376 | 1981 | 1981 | The Devil and Max Devlin          | The Devil and Max Devlin          | Stern, Steven Hilliard           | Steven Hilliard Stern | tt0082263 |
| 1746410193 | 1990 | 1990 | Betsy's Wedding                   | Betsy's Wedding                   | Alda, Alan                       | Alan Alda             | tt0099128 |
| 1745372486 | 2010 | 2009 | The Winning Season                | The Winning Season                | Strouse, James C.                | Jim Strouse           | tt1293842 |
| 1746219378 | 1978 | 1978 | Oliver's Story                    | Oliver's Story                    | Korty, John                      | John Korty            | tt0078024 |
| 1746250983 | 1977 | 1977 | Tentacles                         | Tentacles                         | Hellman, Oliver                  | Ovidio G. Assonitis   | tt0076809 |
| 1769973262 | 1970 | 1971 | The Young Erotic Fanny Hill       | The Young, Erotic Fanny Hill      | Sarno, Joe                       | Joseph W. Sarno       | tt0066596 |
| 1746218991 | 1971 | 1971 | A Fable                           | A Fable                           | Freeman, Al                      | Al Freeman Jr.        | tt0122059 |
| 1745341984 | 2008 | 2008 | Nim's Island                      | Nim's Island                      | Levin, Mark; Flackett, Jennifer  | Jennifer Flackett     | tt0410377 |
| 1746211263 | 1974 | 1974 | Confessor                         | Confessor                         | Bergman, Edward; Soffin, Alan    | Edward Bergman        | tt0181411 |
| 1745339924 | 2004 | 2004 | Hair Show                         | Hair Show                         | Small, Leslie                    | Leslie Small          | tt0382561 |
| 1745309207 | 2006 | 2006 | The Dead Girl                     | The Dead Girl                     | Moncrieff, Karen                 | Karen Moncrieff       | tt0783238 |
| 1746210297 | 1970 | 1970 | Wanderlove                        | Wanderlove                        | Fist, Fletcher                   | Fletcher Fist         | tt0295681 |
| 1745396434 | 2009 | 2008 | An American Affair                | An American Affair                | Olsson, William Sten             | William Olsson        | tt0899138 |
| 1746219005 | 1976 | 1975 | Diamonds                          | Diamonds                          | Golan, Menahem                   | Menahem Golan         | tt0072877 |
| 1746393238 | 1987 | 1987 | Commando Squad                    | Commando Squad                    | Ray, Fred Olen                   | Fred Olen Ray         | tt0092769 |
| 1746420233 | 1988 | 1987 | King Lear                         | King Lear                         | Godard, Jean-Luc                 | Jean                  | tt0093349 |
| 1745302559 | 2005 | 2005 | Don't Tell                        | Don't Tell                        | Eaton, Isaac H.                  | Isaac H. Eaton        | tt0417077 |
| 1746410729 | 1988 | 1988 | The Moderns                       | The Moderns                       | Rudolph, Alan                    | Alan Rudolph          | tt0095649 |
| 1746421663 | 1999 | 1999 | Matters of Consequence            | Matters of Consequence            | Higby, Morgan                    | Morgan Higby Night    | tt0480557 |
| 1746421619 | 1991 | 1991 | Femme Fatale                      | Femme Fatale                      | Gutfreund, André                 | Andre R. Gutfreund    | tt0101866 |
| 1745282654 | 2007 | 2006 | Amateur Porn Star Killer          | Amateur Porn Star Killer          | Ryan, Shane                      | Shane Ryan            | tt0772152 |
| 1745359121 | 2008 | 2008 | Hats Off                          | Hats Off                          | Johnstone, Jyll                  | Jyll Johnstone        | tt1194127 |
| 1746235321 | 1971 | 1971 | Valdez Is Coming                  | Valdez Is Coming                  | Sherin, Edwin                    | Edwin Sherin          | tt0067921 |
| 1746210623 | 1972 | 1972 | Garden of the Dead                | Garden of the Dead                | Hayes, John                      | John Hayes            | tt0068621 |
| 1746420779 | 1995 | 1994 | Nina Takes a Lover                | Nina Takes a Lover                | Jacobs, Alan                     | Alan Jacobs           | tt0110671 |
| 1745341241 | 2010 | 2009 | October Country                   | October Country                   | Palmieri, Michael; Mosher, Donal | Michael Palmieri      | tt1326831 |
| 1746410183 | 1986 | 1986 | My Chauffeur                      | My Chauffeur                      | Beaird, David                    | David Beaird          | tt0091579 |
| 1745358897 | 2010 | 2009 | Still Bill                        | Still Bill                        | Baker, Damani; Vlack, Alex       | Damani Baker          | tt1333117 |
| 1746235404 | 1973 | 1973 | Two People                        | Two People                        | Wise, Robert                     | Robert Wise           | tt0070845 |
| 1745341543 | 2002 | 2001 | Some Body                         | Some Body                         | Barriall, Henry                  | Henry Barriall        | tt0274868 |
| 1746420888 | 1992 | 1992 | Year of the Comet                 | Year of the Comet                 | Yates, Peter                     | Peter Yates           | tt0105871 |
| 1745372686 | 2004 | 2004 | Stage Beauty                      | Stage Beauty                      | Eyre, Richard                    | Richard Eyre          | tt0368658 |
| 1746274111 | 1980 | 1980 | Those Lips, Those Eyes            | Those Lips, Those Eyes            | Pressman, Michael                | Michael Pressman      | tt0081625 |
| 1746408448 | 1986 | 1986 | Wisdom                            | Wisdom                            | Estevez, Emilio                  | Emilio Estevez        | tt0092225 |
| 1746394478 | 1986 | 1986 | That's Life!                      | That's Life!                      | Edwards, Blake                   | Blake Edwards         | tt0092079 |
| 1746218866 | 1972 | 1972 | Georgia, Georgia                  | Georgia, Georgia                  | Björkman, Stig                   | Stig Björkman         | tt0068632 |
| 1745302281 | 2006 | 2006 | Unknown                           | Unknown                           | Brand, Simon                     | Simon Brand           | tt0450340 |
| 1746420108 | 1986 | 1986 | Dream Lover                       | Dream Lover                       | Pakula, Alan J.                  | Alan J. Pakula        | tt0090970 |
| 1746410153 | 1986 | 1986 | Hollywood in Trouble              | Hollywood in Trouble              | Merhi, Joseph                    | Joseph Merhi          | tt0370748 |
| 1746420905 | 1982 | 1982 | Mademoiselle                      | Mademoiselle                      | Murolo, Giuseppe                 |                       | tt0077885 |
| 1746269668 | 1976 | 1975 | Street Girls                      | Street Girls                      | Miller, Michael                  | Michael Miller        | tt0072222 |
| 1746235422 | 1977 | 1977 | Final Chapter—Walking Tall        | Final Chapter: Walking Tall       | Starrett, Jack                   | Jack Starrett         | tt0076028 |
| 1746393290 | 1988 | 1988 | Aloha Summer                      | Aloha Summer                      | Wallace, Tommy Lee               | Tommy Lee Wallace     | tt0094637 |
| 1746434650 | 2000 | 1999 | Eastside                          | Eastside                          | David, Lorena                    | Lorena David          | tt0201584 |
| 1746219713 | 1974 | 1975 | Mr. Sycamore                      | Mr. Sycamore                      | Kohner, Pancho                   | Pancho Kohner         | tt0071867 |
| 1745359621 | 2010 | 2009 | The Good Heart                    | The Good Heart                    | Kári, Dagur                      | Dagur Kári            | tt0808285 |
| 1746249049 | 1974 | 1974 | The Spectre of Edgar Allan Poe    | The Spectre of Edgar Allan Poe    | Quandour, Mohy                   | Mohy Quandour         | tt0072197 |
| 1746219031 | 1976 | 1976 | Gable and Lombard                 | Gable and Lombard                 | Furie, Sidney J.                 | Sidney J. Furie       | tt0074562 |

|            |      |      |                                               |                                               |                                       |                    |           |
|------------|------|------|-----------------------------------------------|-----------------------------------------------|---------------------------------------|--------------------|-----------|
| 1746409960 | 1987 | 1987 | Under Cover                                   | Under Cover                                   | Stockwell, John                       | John Stockwell     | tt0094215 |
| 1746235861 | 1975 | 1975 | White Line Fever                              | White Line Fever                              | Kaplan, Jonathan                      | Jonathan Kaplan    | tt0073896 |
| 1746410458 | 1985 | 1984 | Mixed Blood                                   | Mixed Blood                                   | Morrissey, Paul                       | Paul Morrissey     | tt0089607 |
| 1746211493 | 1970 | 1970 | The Gamblers                                  | The Gamblers                                  | Winston, Ron                          | Ron Winston        | tt0064359 |
| 1745340006 | 2002 | 2001 | MVP2: Most Vertical Primate                   | MVP: Most Vertical Primate                    | Vince, Robert                         | Robert Vince       | tt0285685 |
| 1746420524 | 1992 | 1992 | The Magical World of Chuck Jones              | The Magical World of Chuck Jones              | Daugherty, George                     | George Daugherty   | tt0104789 |
| 1746250016 | 1978 | 1978 | Casey's Shadow                                | Casey's Shadow                                | Ritt, Martin                          | Martin Ritt        | tt0077303 |
| 1745339991 | 2002 | 2002 | State Property                                | State Property                                | Abbott, Abdul Malik                   | Abdul Malik Abbott | tt0301893 |
| 1745373534 | 2008 | 2008 | Amateur Porn Star Killer 2                    | Amateur Porn Star Killer 2                    | Ryan, Shane                           | Shane Ryan         | tt1161951 |
| 1746210766 | 1972 | 1972 | Dreamwood                                     | Dreamwood                                     | Broughton, James S.                   | James Broughton    | tt0068506 |
| 1746235528 | 1977 | 1977 | Rabid                                         | Rabid                                         | Cronenberg, David                     | David Cronenberg   | tt0076590 |
| 1746394512 | 1992 | 1992 | In the Heat of Passion                        | In the Heat of Passion                        | Flender, Rodman                       | Rodman Flender     | tt0104499 |
| 1746269702 | 1976 | 1976 | JIM the World's Greatest                      | Jim, the World's Greatest                     | Coscarelli, Don; Mitchell, Craig      | Don Coscarelli     | tt0074714 |
| 1746420364 | 1993 | 1993 | Much Ado About Nothing                        | Much Ado About Nothing                        | Branagh, Kenneth                      | Kenneth Branagh    | tt0107616 |
| 1746269483 | 1976 | 1976 | Rattlers                                      | Rattlers                                      | McCauley, John                        | John McCauley      | tt0073609 |
| 1745309632 | 2007 | 2007 | The Invasion                                  | The Invasion                                  | Hirschbiegel, Oliver                  | Channing Lowe      | tt1808557 |
| 1745309356 | 2007 | 2006 | Delirious                                     | Delirious                                     | DiCillo, Tom                          | Tom DiCillo        | tt0412637 |
| 1745342790 | 2008 | 2008 | Journey to the Center of the Earth            | Journey to the Center of the Earth            | Brevig, Eric                          | T.J. Scott         | tt1156454 |
| 1746249990 | 1976 | 1976 | Black Heat                                    | Black Heat                                    | Adamson, Al                           | Al Adamson         | tt0125015 |
| 1746211233 | 1971 | 1971 | Soul to Soul                                  | Soul to Soul                                  | Sanders, Denis                        | Denis Sanders      | tt0244807 |
| 1745309548 | 2007 | 2006 | The Changeling                                | The Changeling                                | Stern, Jay                            | Jay Stern          | tt0980967 |
| 1746235029 | 1976 | 1976 | Hawmps                                        | Hawmps!                                       | Camp, Joe                             | Joe Camp           | tt0074614 |
| 1746419368 | 1991 | 1991 | Drop Dead Fred                                | Drop Dead Fred                                | de Jong, Ate                          | Ate de Jong        | tt0101775 |
| 1745282870 | 2007 | 2006 | The Singing Revolution                        | The Singing Revolution                        | Tusty, James ; Tusty, Maureen Castle  | James Tusty        | tt0954008 |
| 1746434689 | 1994 | 1994 | The Next Karate Kid                           | The Next Karate Kid                           | Cain, Christopher                     | Christopher Cain   | tt0110657 |
| 1746235486 | 1972 | 1972 | Greaser's Palace                              | Greaser's Palace                              | Downey, Robert                        | Robert Downey Sr.  | tt0068659 |
| 1745372497 | 2009 | 2009 | Afterschool                                   | After School                                  | Campos, Antonio                       | Fritz Eberle       | tt1512704 |
| 1745359296 | 2008 | 2008 | Seven Pounds                                  | Seven Pounds                                  | Muccino, Gabriele                     | Gabriele Muccino   | tt0814314 |
| 1745359964 | 2008 | 2007 | America the Beautiful                         | America the Beautiful                         | Roberts, Darryl                       | Darryl Roberts     | tt1040007 |
| 1745373090 | 2010 | 2010 | Prince of Swine                               | Prince of Swine                               | Toma, Mark                            | Mark Toma          | tt1186665 |
| 1746209753 | 1970 | 1970 | Monte Walsh                                   | Monte Walsh                                   | Fraker, William A.                    | William A. Fraker  | tt0066093 |
| 1745358076 | 2004 | 2004 | The Phantom of the Opera                      | The Phantom of the Opera                      | Schumacher, Joel                      | Joel Schumacher    | tt0293508 |
| 1746393958 | 1991 | 1991 | Firehead                                      | Firehead                                      | Yuval, Peter                          | Peter Yuval        | tt0099577 |
| 1746578715 | 1960 | 1960 | Tunes of Glory                                | Tunes of Glory                                | Neame, Ronald                         | Ronald Neame       | tt0054412 |
| 1746419139 | 1987 | 1987 | Nice Girls Don't Explode                      | Nice Girls Don't Explode                      | Martinez, Chuck                       | Chuck Martinez     | tt0093617 |
| 1746422306 | 1999 | 1999 | A Map of the World                            | A Map of the World                            | Elliott, Scott                        | Scott Elliott      | tt0160513 |
| 1746455609 | 1997 | 1997 | The Full Monty                                | The Full Monty                                | Cattaneo, Peter                       | Peter Cattaneo     | tt0119164 |
| 1746419396 | 1992 | 1992 | Nickel & Dime                                 | Nickel & Dime                                 | Moses, Ben                            | Ben Moses          | tt0104994 |
| 1746394024 | 1988 | 1988 | The Milagro Beanfield War                     | The Milagro Beanfield War                     | Redford, Robert                       | Robert Redford     | tt0095638 |
| 1746408691 | 1993 | 1993 | Born Yesterday                                | Born Yesterday                                | Mandoki, Luis                         | Luis Mandoki       | tt0106466 |
| 1745302354 | 2007 | 2007 | Note By Note: The Making of Steinway L1037    | Note by Note: The Making of Steinway L1037    | Niles, Ben                            | Ben Niles          | tt1149400 |
| 1746249988 | 1979 | 1979 | Hair                                          | Hair                                          | Forman, Milos                         | Milos Forman       | tt0079261 |
| 1745302789 | 2005 | 2005 | Lustre                                        | Lustre                                        | Jones, Art                            | Art Jones          | tt0363779 |
| 1745396242 | 2010 | 2009 | Leonard Cohen Live at the Isle of Wight 1970  | Leonard Cohen: Live at the Isle of Wight 1970 | Lerner, Murray                        | Murray Lerner      | tt1604116 |
| 1746410688 | 1982 | 1982 | Split Image                                   | Split Image                                   | Kotcheff, Ted                         | Ted Kotcheff       | tt0084714 |
| 1746438572 | 1998 | 1998 | A Perfect Murder                              | A Perfect Murder                              | Davis, Andrew                         | Andrew Davis       | tt0120787 |
| 1746235198 | 1975 | 1975 | Legacy                                        | Legacy                                        | Arthur, Karen                         | Karen Arthur       | tt0073272 |
| 1745341453 | 2010 | 2010 | The Company Men                               | The Company Men                               | Wells, John                           | John Wells         | tt1172991 |
| 1745331897 | 2011 | 2010 | To Be Heard                                   | To Be Heard                                   | Legiardi-Laura, Roland ; Martinez, Ed | Roland Legiardi    | tt1548303 |
| 1746235522 | 1978 | 1978 | Force 10 from Navarone                        | Force 10 from Navarone                        | Hamilton, Guy                         | Guy Hamilton       | tt0077572 |
| 1746270083 | 1978 | 1978 | The Magic of Lassie                           | The Magic of Lassie                           | Chaffey, Don                          | Don Chaffey        | tt0077890 |
| 1745303144 | 2005 | 2005 | Rittenhouse Square                            | Rittenhouse Square                            | Downey, Sr., Robert                   | Robert Downey Sr.  | tt0473254 |
| 1746249068 | 1976 | 1976 | Robin and Marian                              | Robin and Marian                              | Lester, Richard                       | Richard Lester     | tt0075147 |
| 1745359555 | 2010 | 2010 | Strange Powers: Stephin Merritt and the Magne | Strange Powers: Stephin Merritt and the Magne | Fix, Kerthy; O'Hara, Gail             | Kerthy Fix         | tt1534075 |
| 1745272624 | 2001 | 2001 | Angel Eyes                                    | Angel Eyes                                    | Mandoki, Luis                         | Luis Mandoki       | tt0225071 |
| 1745293832 | 2005 | 2005 | Dominion Prequel to the Exorcist              | Dominion: Prequel to the Exorcist             | Schrader, Paul                        | Paul Schrader      | tt0449086 |
| 1745342492 | 2001 | 2001 | My First Mister                               | My First Mister                               | Lahti, Christine                      | Christine Lahti    | tt0206963 |

|            |      |      |                                          |                                          |                           |                     |           |
|------------|------|------|------------------------------------------|------------------------------------------|---------------------------|---------------------|-----------|
| 1746421180 | 1991 | 1991 | The Man in the Moon                      | The Man in the Moon                      | Mulligan, Robert          | Robert Mulligan     | tt0102388 |
| 1746422531 | 1992 | 1992 | The Muppet Christmas Carol               | The Muppet Christmas Carol               | Henson, Brian             | Brian Henson        | tt0104940 |
| 1746248849 | 1975 | 1975 | Saturday Night at the Baths              | Saturday Night at the Baths              | Buckley, David            | David Buckley       | tt0257099 |
| 1746200427 | 1970 | 1970 | 4 Clowns                                 | 4 Clowns                                 |                           | Robert Youngson     | tt0146398 |
| 1746235333 | 1976 | 1976 | Joshua                                   | Joshua                                   | Spangler, Larry           | Larry G. Spangler   | tt0074719 |
| 1746271847 | 1978 | 1979 | Only Once in a Lifetime                  | Only Once in a Lifetime                  | Grattan, Alejandro        | Alejandro Grattan   | tt0079669 |
| 1746235308 | 1971 | 1971 | The Organization                         | The Organization                         | Medford, Don              | Don Medford         | tt0067535 |
| 1746235354 | 1972 | 1972 | The Deathmaster                          | Deathmaster                              | Danton, Ray               | Ray Danton          | tt0068459 |
| 1746218905 | 1974 | 1974 | Open Season                              | Open Season                              | Collinson, Peter          | Peter Collinson     | tt0071292 |
| 1746259411 | 1979 | 1979 | California Dreaming                      | California Dreaming                      | Hancock, John             | John D. Hancock     | tt0078928 |
| 1746455229 | 1995 | 1995 | Art for Teachers of Children             | Art for Teachers of Children             | Montgomery, Jennifer      | Jennifer Montgomery | tt0112393 |
| 1746235507 | 1971 | 1971 | Taking Off                               | Taking Off                               | Forman, Milos             | Milos Forman        | tt0067820 |
| 1746409689 | 1989 | 1988 | War Party                                | War Party                                | Roddam, Franc             | Franc Roddam        | tt0098619 |
| 1746219191 | 1977 | 1977 | Nasty Habits                             | Nasty Habits                             | Lindsay-Hogg, Michael     | Michael Lindsay     | tt0076440 |
| 1746393192 | 1987 | 1987 | The Big Town                             | The Big Town                             | Bolt, Ben; Becker, Harold | Ben Bolt            | tt0092656 |
| 1746423566 | 1991 | 1991 | Dead Women in Lingerie                   | Dead Women in Lingerie                   | Fox, Erica                | Erica Fox           | tt0101676 |
| 1745396063 | 2009 | 2008 | Blast!                                   | BLAST!                                   | Devlin, Paul              | Paul Devlin         | tt1190065 |
| 1745293558 | 2007 | 2007 | Margot at the Wedding                    | Margot at the Wedding                    | Baumbach, Noah            | Noah Baumbach       | tt0757361 |
| 1745272254 | 2000 | 2000 | Rebels with a Cause                      | Rebels with a Cause                      | Garvey, Helen             | Helen Garvy         | tt0255549 |
| 1746235495 | 1976 | 1976 | Alex and the Gypsy                       | Alex & the Gypsy                         | Korty, John               | John Korty          | tt0074112 |
| 1745342273 | 2009 | 2009 | 9                                        | 9                                        | Acker, Shane              | Alfred Eaker        | tt4270692 |
| 1745342631 | 2004 | 2004 | Thunderbirds                             | Thunderbirds                             | Frakes, Jonathan          | Jonathan Frakes     | tt0167456 |
| 1746219616 | 1979 | 1979 | Avalanche Express                        | Avalanche Express                        | Robson, Mark              | Mark Robson         | tt0078812 |
| 1769973295 | 1970 | 1970 | Secretaries Spread                       | Secretaries Spread                       |                           |                     | tt0257121 |
| 1746233250 | 1968 | 1968 | Now Cinema!                              | The New Cinema                           |                           | Gary Young          | tt1777001 |
| 1746218869 | 1977 | 1977 | Looking Up                               | Looking Up                               | Yellen, Linda             | Linda Yellen        | tt0076326 |
| 1745373522 | 2001 | 2000 | I Remember Me                            | I Remember Me                            | Snyder, Kim A.            | Kim A. Snyder       | tt0293270 |
| 1745393699 | 2010 | 2010 | Gerrymandering                           | Gerrymandering                           | Reichert, Jeff            | Jeff Reichert       | tt1241319 |
| 1745342836 | 2011 | 2010 | Immigration Tango                        | Immigration Tango                        | Morris, David Burton      | David Burton Morris | tt1415269 |
| 1746409291 | 1983 | 1983 | Wavelength                               | Wavelength                               | Gray, Mike                | Mike Gray           | tt0086571 |
| 1746421343 | 1991 | 1991 | Kafka                                    | Kafka                                    | Soderbergh, Steven        | Steven Soderbergh   | tt0102181 |
| 1746455666 | 2000 | 1999 | Grizzly Falls                            | Grizzly Falls                            | Raffill, Stewart          | Stewart Raffill     | tt0196596 |
| 1745272833 | 2000 | 2000 | The Specials                             | The Specials                             | Mazin, Craig              | Craig Mazin         | tt0181836 |
| 1746210697 | 1971 | 1971 | Been Down So Long It Looks Like Up to Me | Been Down So Long It Looks Like Up to Me | Young, Jeffrey            | Jeffrey Young       | tt0066818 |
| 1746211088 | 1972 | 1972 | The Great Waltz                          | The Great Waltz                          | Stone, Andrew L.          | Andrew L. Stone     | tt0068662 |
| 1745359478 | 2008 | 2007 | How She Move                             | How She Move                             | Rashid, Ian Iqbal         | Ian Iqbal Rashid    | tt0770810 |
| 1746248840 | 1979 | 1979 | Old Boyfriends                           | Old Boyfriends                           | Tewkesbury, Joan          | Joan Tewkesbury     | tt0079660 |
| 1746409733 | 1981 | 1981 | Carbon Copy                              | Carbon Copy                              | Schultz, Michael          | Michael Schultz     | tt0082138 |
| 1745359308 | 2010 | 2009 | The Philosopher Kings                    | The Philosopher Kings                    | Shen, Patrick             | Patrick Shen        | tt1219832 |
| 1745271804 | 2000 | 2000 | Psycho Beach Party                       | Psycho Beach Party                       | King, Robert Lee          | Robert Lee King     | tt0206226 |
| 1746210530 | 1971 | 1970 | Mrs. Pollifax--Spy                       | Mrs. Pollifax Spy                        | Martinson, Leslie         | Leslie H. Martinson | tt0067451 |
| 1746393509 | 1987 | 1987 | Nadine                                   | Nadine                                   | Benton, Robert            | Robert Benton       | tt0093596 |
| 1746408502 | 1986 | 1986 | Salvador                                 | Salvador                                 | Stone, Oliver             | Oliver Stone        | tt0091886 |
| 1746209878 | 1970 | 1970 | Jack Johnson                             | Jack Johnson                             | Cayton, William           | Jim Jacobs          | tt0065906 |
| 1745342518 | 2004 | 2003 | Touching the Void                        | Touching the Void                        | Macdonald, Kevin          | Kevin Macdonald     | tt0379557 |
| 1745359165 | 2010 | 2009 | Etienne!                                 | Etienne!                                 | Mizushima, Jeff           | Jeff Mizushima      | tt1087443 |
| 1746437587 | 1997 | 1997 | Eye of God                               | Eye of God                               | Nelson, Tim Blake         | Tim Blake Nelson    | tt0116261 |
| 1746421235 | 1997 | 1997 | The Deli                                 | The Deli                                 | Gallagher, John Andrew    | John A. Gallagher   | tt0118958 |
| 1745341862 | 2008 | 2008 | Smother                                  | Smother                                  | Di Meglio, Vince          | Luis Gispert        | tt1252409 |
| 1745359501 | 2009 | 2009 | The Collector                            | The Collector                            | Dunstan, Marcus           | Frederik Wiegel     | tt1338570 |
| 1746218600 | 1971 | 1971 | I Eat Your Skin                          | I Eat Your Skin                          | Tenney, Del               | Del Tenney          | tt0054724 |
| 1745374443 | 2003 | 2002 | New Suit                                 | New Suit                                 | Velle, François           | François Velle      | tt0290249 |
| 1745293182 | 2005 | 2004 | Zombie Honeymoon                         | Zombie Honeymoon                         | Gebroe, Dave              | David Gebroe        | tt0399934 |
| 1746409479 | 1982 | 1982 | Genocide                                 | Genocide                                 | Schwartzman, Arnold       | Arnold Schwartzman  | tt0082443 |
| 1746393682 | 1984 | 1984 | The Stone Boy                            | The Stone Boy                            | Cain, Christopher         | Christopher Cain    | tt0088176 |
| 1746257779 | 1977 | 1976 | Nashville Girl                           | Nashville Girl                           | Trikonis, Gus             | Gus Trikonis        | tt0074954 |
| 1746437103 | 1996 | 1995 | Angels and Insects                       | Angels and Insects                       | Haas, Philip              | Philip Haas         | tt0112365 |

|            |      |      |                                                  |                                             |                                     |                        |           |
|------------|------|------|--------------------------------------------------|---------------------------------------------|-------------------------------------|------------------------|-----------|
| 1746393380 | 1984 | 1984 | Songwriter                                       | Songwriter                                  | Rudolph, Alan                       | Alan Rudolph           | tt0088153 |
| 1746454960 | 1999 | 1999 | Notting Hill                                     | Notting Hill                                | Michell, Roger                      | Roger Michell          | tt0125439 |
| 1746394034 | 1983 | 1983 | The Man Who Wasn't There                         | The Man Who Wasn't There                    | Malmuth, Bruce                      | Bruce Malmuth          | tt0085892 |
| 1745358560 | 2004 | 2004 | Monster                                          | The Monsters                                | Jenkins, Patty                      | Tony Potter            | tt1525897 |
| 1746392978 | 1984 | 1984 | Impulse                                          | Impulse                                     | Baker, Graham                       | Graham Baker           | tt0087464 |
| 1746454865 | 1998 | 1998 | Biker Dreams                                     | Biker Dreams                                | Berman, Adam                        | Adam Berman            | tt0169612 |
| 1746210449 | 1971 | 1971 | Night of Dark Shadows                            | Night of Dark Shadows                       | Curtis, Dan                         | Dan Curtis             | tt0067491 |
| 1746408904 | 1985 | 1985 | Return to Oz                                     | Return to Oz                                | Murch, Walter                       | Walter Murch           | tt0089908 |
| 1745293301 | 2005 | 2005 | The Fearless Freaks                              | The Fearless Freaks                         | Beesley, Bradley                    | Bradley Beesley        | tt0441758 |
| 1746235085 | 1971 | 1971 | Welcome to the Club                              | Welcome to the Club                         | Shenson, Walter                     | Walter Shenson         | tt0067967 |
| 1746218688 | 1973 | 1973 | Arnold's Wrecking Co.                            | Arnold's Wrecking Co.                       | de Souza, Steve                     | Steven E. de Souza     | tt0177522 |
| 1745309178 | 2004 | 2004 | Crazy Legs Conti: Zen and the Art of Competitive | Crazy Legs Conti: Zen and the Art of Compet | Franco, Danielle ; Kenneally, Chris | Danielle Franco        | tt0415727 |
| 1745359222 | 2010 | 2010 | Cyrus                                            | Cyrus                                       | Duplass, Jay ; Duplass, Mark        | Mark Vadik             | tt1327709 |
| 1746421179 | 1990 | 1990 | Hollywood Mavericks                              | Hollywood Mavericks                         |                                     | Florence Dauman        | tt0280745 |
| 1745342081 | 2010 | 2010 | Jack Goes Boating                                | Jack Goes Boating                           | Hoffman, Philip Seymour             | Philip Seymour Hoffman | tt1278379 |
| 1746393234 | 1985 | 1985 | The Protector                                    | The Protector                               | Glickenhau, James                   | James Glickenhau       | tt0089847 |
| 1746394543 | 1981 | 1981 | Take This Job and Shove It                       | Take This Job and Shove It                  | Trikonis, Gus                       | Gus Trikonis           | tt0083163 |
| 1746420516 | 1992 | 1992 | Rapid Fire                                       | Rapid Fire                                  | Little, Dwight H.                   | Dwight H. Little       | tt0105219 |
| 1745374410 | 2003 | 2002 | Stoked: The Rise and Fall of Gator               | Stoked: The Rise and Fall of Gator          | Stickler, Helen                     | Helen Stickler         | tt0271211 |
| 1746256776 | 1975 | 1975 | Gifts of an Eagle                                | Gifts of an Eagle                           | Fleming, Rex                        | Rex J. Fleming         | tt5462950 |
| 1746423280 | 1999 | 1998 | Placebo Effect                                   | Placebo Effect                              | Seri, Alejandro                     | Alejandro Seri         | tt0163154 |
| 1745393786 | 2008 | 2008 | The Little Red Truck                             | The Little Red Truck                        | Whitehair, Rob                      | Rob Whitehair          | tt1247677 |
| 1746409448 | 1988 | 1988 | South of Reno                                    | South of Reno                               | Rezyka, Mark                        | Mark Rezyka            | tt0096147 |
| 1746393350 | 1988 | 1988 | Seven Hours to Judgment                          | Seven Hours to Judgment                     | Bridges, Beau                       | Beau Bridges           | tt0096072 |
| 1746210771 | 1972 | 1972 | Snow Job                                         | Snow Job                                    | Englund, George                     | George Englund         | tt0069290 |
| 1746219402 | 1974 | 1974 | Teenager                                         | Teenager                                    | Sindell, Gerald Seth                | Gerald Seth Sindell    | tt0174264 |
| 1746235353 | 1971 | 1971 | Wild Rovers                                      | Wild Rovers                                 | Edwards, Blake                      | Blake Edwards          | tt0067989 |
| 1745373943 | 2011 | 2010 | Kaboom                                           | Kaboom                                      | Araki, Gregg                        | Gregg Araki            | tt1523483 |
| 1746250165 | 1975 | 1975 | The Other Side of the Mountain                   | The Other Side of the Mountain              | Peerce, Larry                       | Larry Peerce           | tt0073496 |
| 1745332504 | 2011 | 2010 | Shit Year                                        | Shit Year                                   | Archer, Cam                         | Cam Archer             | tt1294212 |
| 1746455302 | 1997 | 1997 | Washington Square                                | Washington Square                           | Holland, Agnieszka                  | Agnieszka Holland      | tt0120481 |
| 1745342199 | 2010 | 2010 | Centurion                                        | Centurion                                   | Marshall, Neil                      | Neil Marshall          | tt1020558 |
| 1746409072 | 1987 | 1987 | The Killing Time                                 | The Killing Time                            | King, Rick                          | Rick King              | tt0093347 |
| 1745282873 | 2005 | 2005 | 39 Pounds of Love                                | 39 Pounds of Love                           | Menkin, Dani                        | Dani Menkin            | tt0448978 |
| 1769973225 | 1970 | 1970 | Only in My Dreams                                | Only in My Dreams                           | Peters, Victor                      | Victor Petrashevic     | tt0254630 |
| 1746409947 | 1983 | 1983 | Lovesick                                         | Lovesick                                    | Brickman, Marshall                  | Marshall Brickman      | tt0085873 |
| 1746392669 | 1983 | 1983 | A Night in Heaven                                | A Night in Heaven                           | Avildsen, John G.                   | John G. Avildsen       | tt0086011 |
| 1746434935 | 1989 | 1989 | Stepfather II                                    | Stepfather II                               | Burr, Jeff                          | Jeff Burr              | tt0098385 |
| 1746251511 | 1975 | 1975 | Nothing by Chance                                | Nothing by Chance                           | Barnett, William H.                 | William H. Barnett     | tt0345722 |
| 1746454223 | 1997 | 1997 | This World, Then the Fireworks                   | This World, Then the Fireworks              | Oblowitz, Michael                   | Michael Oblowitz       | tt0117898 |
| 1745342670 | 2011 | 2010 | 3 Backyards                                      | 3 Backyards                                 | Mendelsohn, Eric                    | Eric Mendelsohn        | tt1314190 |
| 1746393657 | 1984 | 1984 | Chattanooga Choo Choo                            | Chattanooga Choo Choo                       | Bilson, Bruce                       | Bruce Bilson           | tt0087041 |
| 1746455770 | 1997 | 1997 | The Next Step                                    | The Next Step                               | Faber, Christian                    | Christian Faber        | tt0113968 |
| 1746211274 | 1973 | 1973 | Ace Eli and Rodger of the Skies                  | Ace Eli and Rodger of the Skies             | Sampson, Bill                       | John Erman             | tt0069676 |
| 1746219563 | 1971 | 1971 | The Touch                                        | The Touch                                   | Bergman, Ingmar                     | Ingmar Bergman         | tt0066826 |
| 1746394178 | 1989 | 1988 | Łódź Ghetto                                      | Lodz Ghetto                                 | Taverna, Kathryn; Adelson, Alan     | Alan Adelson           | tt0097772 |
| 1746419932 | 1991 | 1991 | Year of the Gun                                  | Year of the Gun                             | Frankenheimer, John                 | John Frankenheimer     | tt0103303 |
| 1746235680 | 1974 | 1974 | The Bank Shot                                    | Bank Shot                                   | Champion, Gower                     | Gower Champion         | tt0071194 |
| 1745374382 | 2010 | 2010 | And Soon the Darkness                            | And Soon the Darkness                       | Efron, Marcos                       | Marcos Efron           | tt1391034 |
| 1745340277 | 2002 | 2002 | Soap Girl                                        | Soap Girl                                   | Kang, Young Man                     | Young Man Kang         | tt0304729 |
| 1746410676 | 1986 | 1986 | Mother Teresa                                    | Mother Teresa                               | Petrie, Ann; Petrie, Jeanette       | Ann Petrie             | tt0091558 |
| 1746256566 | 1979 | 1979 | Rich Kids                                        | Rich Kids                                   | Young, Robert M.                    | Robert M. Young        | tt0079806 |
| 1745375301 | 2009 | 2009 | You Cannot Start Without Me -- Valery Gergiev, I | You Cannot Start Without Me: Valery Gergie  | Miller, Allan                       | Allan Miller           | tt1532591 |
| 1746209824 | 1970 | 1970 | Pacific Vibrations                               | Pacific Vibrations                          | Severson, John                      | John Severson          | tt0196823 |
| 1745372873 | 2004 | 2004 | Intermission                                     | Intermission                                | Crowley, John                       | Laura Cayouette        | tt0405048 |
| 1746210091 | 1970 | 1970 | The People Next Door                             | The People Next Door                        | Greene, David                       | David Greene           | tt0066209 |
| 1746455004 | 1994 | 1993 | Thieves Quartet                                  | Thieves Quartet                             | Chappelle, Joe                      | Joe Chappelle          | tt0111412 |

|            |      |      |                                              |                                              |                                     |                       |           |
|------------|------|------|----------------------------------------------|----------------------------------------------|-------------------------------------|-----------------------|-----------|
| 1746422141 | 1994 | 1994 | Maya Lin: A Strong Clear Vision              | Maya Lin: A Strong Clear Vision              | Mock, Freida Lee                    | Freida Lee Mock       | tt0110480 |
| 1746423563 | 1998 | 1997 | First Love, Last Rites                       | First Love, Last Rites                       | Peretz, Jesse                       | Jesse Peretz          | tt0128214 |
| 1746422263 | 1996 | 1996 | Some Mother's Son                            | Some Mother's Son                            | George, Terry                       | Terry George          | tt0117690 |
| 1746210923 | 1972 | 1972 | To Kill a Clown                              | To Kill a Clown                              | Bloomfield, George                  | George Bloomfield     | tt0069386 |
| 1746423044 | 1999 | 1999 | Heaven                                       | The Tavern                                   | Reynolds, Scott                     | Walter Foote          | tt0202614 |
| 1746410749 | 1989 | 1988 | To Die For                                   | To Die For                                   | Sarafian, Deran                     | Deran Sarafian        | tt0098482 |
| 1745358049 | 2008 | 2008 | The Lodger                                   | The Lodge                                    | Ondaatje, David                     | Brad Helmink          | tt0475323 |
| 1746282246 | 1980 | 1980 | Tell Me a Riddle                             | Tell Me a Riddle                             | Grant, Lee                          | Lee Grant             | tt0081611 |
| 1746394397 | 1990 | 1990 | After Dark, My Sweet                         | After Dark, My Sweet                         | Foley, James                        | James Foley           | tt0098994 |
| 1746393995 | 1990 | 1990 | The Russia House                             | The Russia House                             | Schepisi, Fred                      | Fred Schepisi         | tt0100530 |
| 1745302957 | 2005 | 2004 | Fighting Tommy Riley                         | Fighting Tommy Riley                         | O'Flaherty, Eddie                   | Eddie O'Flaherty      | tt0366444 |
| 1746393182 | 1986 | 1986 | Welcome to 18                                | Welcome to 18                                | Carr, Terry                         | Terry Carr            | tt0092199 |
| 1746394217 | 1991 | 1991 | Bingo                                        | Bingo                                        | Robbins, Matthew                    | Matthew Robbins       | tt0101455 |
| 1746282115 | 1978 | 1977 | Big Time                                     | Big Time                                     | Georgias, Andrew                    | Andrew Georgias       | tt0185931 |
| 1745395646 | 2009 | 2009 | Brothers                                     | Brother                                      | Sheridan, Jim                       | Mary Bing             | tt1470808 |
| 1769973330 | 1970 | 1970 | My Sister's Business                         | My Sister's Business                         |                                     | Bobby Davis           | tt0144396 |
| 1746235310 | 1972 | 1972 | The Hitchhikers                              | The Hitchhikers                              | Sebastian, Ferd; Sebastian, Beverly | Beverly Sebastian     | tt0067206 |
| 1746410152 | 1984 | 1984 | Body Rock                                    | Body Rock                                    | Epstein, Marcelo                    | Marcelo Epstein       | tt0086985 |
| 1746438171 | 1995 | 1995 | Coldblooded                                  | Coldblooded                                  | Wolodarsky, M. Wallace              | Wallace Wolodarsky    | tt0112702 |
| 1746235048 | 1973 | 1973 | The Slams                                    | The Slams                                    | Kaplan, Jonathan                    | Jonathan Kaplan       | tt0070704 |
| 1746408447 | 1982 | 1982 | Monsignor                                    | Monsignor                                    | Perry, Frank                        | Frank Perry           | tt0084351 |
| 1746394544 | 1990 | 1990 | Modern Love                                  | Modern Love                                  | Benson, Robby                       | Robby Benson          | tt0100171 |
| 1746219721 | 1976 | 1976 | The Seven-Per-Cent Solution                  | The Seven Per Cent Solution                  | Ross, Herbert                       | Herbert Ross          | tt0075194 |
| 1746421267 | 1996 | 1997 | Criminals                                    | Criminals                                    | Strick, Joseph                      | Joseph Strick         | tt0115978 |
| 1745302785 | 2005 | 2004 | Winter Solstice                              | Winter Solstice                              | Sternfeld, Josh                     | Ronald J. Ramirez     | tt0461058 |
| 1746219637 | 1973 | 1973 | Brother of the Wind                          | Brother of the Wind                          | Robinson, Dick                      | Dick Robinson         | tt0068318 |
| 1746219581 | 1971 | 1971 | Flame in the Wind                            | Flame in the Wind                            | Stenholm, Katherine                 | Katherine Stenholm    | tt2115319 |
| 1745309299 | 2005 | 2005 | Make It Funky!                               | Make It Funky!                               | Murphy, Michael                     | Michael Murphy        | tt0482543 |
| 1746421718 | 1995 | 1995 | The Run of the Country                       | The Run of the Country                       | Yates, Peter                        | Peter Yates           | tt0114307 |
| 1746218752 | 1973 | 1973 | Summer Wishes, Winter Dreams                 | Summer Wishes, Winter Dreams                 | Cates, Gilbert                      | Gilbert Cates         | tt0070748 |
| 1746250374 | 1977 | 1977 | Teenage Graffiti                             | Teenage Graffiti                             | Casler, Christopher G.              | Christopher G. Casler | tt0076802 |
| 1745357613 | 2009 | 2009 | Sorority Row                                 | Sorority Row                                 | Hendler, Stewart                    | Stewart Hendler       | tt1232783 |
| 1745395992 | 2008 | 2007 | U2 3D                                        | U2 3D                                        | Owens, Catherine ; Pellington, Mark | Catherine Owens       | tt0892375 |
| 1746421300 | 1998 | 1997 | Touch Me                                     | Touch Me                                     | Boos, H. Gordon                     | H. Gordon Boos        | tt0120358 |
| 1745293536 | 2005 | 2005 | Domino                                       | Domino                                       | Scott, Tony                         | Tony Scott            | tt0421054 |
| 1769977775 | 1981 | 1981 | On Any Sunday II                             | On Any Sunday II                             | Forsyth, Ed; Shoemaker, Don         | Ed Forsyth            | tt0158832 |
| 1746410661 | 1993 | 1993 | Silverlake Life: The View from Here          | Silverlake Life: The View from Here          | Joslin, Tom ; Friedman, Peter       | Peter Friedman        | tt0108138 |
| 1746410135 | 1990 | 1990 | Angel Town                                   | Angel Town                                   | Karson, Eric                        | Eric Karson           | tt0099039 |
| 1745394158 | 2010 | 2010 | Burzynski                                    | Burzynski                                    | Merola, Eric                        | Eric Merola           | tt1632703 |
| 1745293358 | 2005 | 2005 | The Big White                                | The Big White                                | Mylod, Mark                         | Mark Mylod            | tt0402850 |
| 1746218745 | 1971 | 1970 | Marco                                        | Marco                                        | Temaner, Gerald; Quinn, Gordon      | Gordon Quinn          | tt0460502 |
| 1769973283 | 1970 | 1970 | Bang Bang                                    | Bang Bang                                    | Tokunow, Alvin; Kaplan, Bill        | William B. Kaplan     | tt1194652 |
| 1746420046 | 1983 | 1983 | Table for Five                               | Table for Five                               | Lieberman, Robert                   | Robert Lieberman      | tt0086405 |
| 1745374963 | 2008 | 2007 | Hell on Wheels                               | Hell on Wheels                               | Ray, Bob                            | Bob Ray               | tt0384162 |
| 1746435314 | 1996 | 1996 | My Knees Were Jumping: Remembering the Kin   | My Knees Were Jumping: Remembering the Kin   | Hacker, Melissa                     | Melissa Hacker        | tt0180854 |
| 1746235373 | 1973 | 1973 | The P.O.W.                                   | The P.O.W.                                   | Dossick, Philip H.                  | Philip H. Dossick     | tt0228694 |
| 1745359471 | 2008 | 2007 | War Made Easy: How Presidents & Pundits Keep | War Made Easy: How Presidents & Pundits Keep | Alper, Loretta ; Earp, Jeremy       | Loretta Alper         | tt1015246 |
| 1745374954 | 2009 | 2009 | Breaking Point                               | Breaking Point                               | Celentano, Jeff                     | Jeff Celentano        | tt0965375 |
| 1746421322 | 1995 | 1995 | 3 Ninjas Knuckle Up                          | 3 Ninjas Knuckle Up                          | Sheen, Simon S.                     | Sang                  | tt0112255 |
| 1746409349 | 1985 | 1985 | Smooth Talk                                  | Smooth Talk                                  | Chopra, Joyce                       | Joyce Chopra          | tt0090037 |
| 1746453682 | 1997 | 1997 | One Night Stand                              | One Night Stand                              | Figgis, Mike                        | Mike Figgis           | tt0119832 |
| 1746235244 | 1977 | 1977 | Joyride                                      | Joyride                                      | Ruben, Joseph                       | Joseph Ruben          | tt0076239 |
| 1745341435 | 2008 | 2008 | Burning the Future: Coal in America          | Burning the Future: Coal in America          | Novack, David                       | David Novack          | tt1065120 |
| 1746250409 | 1975 | 1975 | Lifespan                                     | Lifespan                                     | Whitelaw, Alexander                 | Sandy Whitelaw        | tt0071756 |
| 1746233000 | 1970 | 1970 | Walk the Walk                                | Walk the Walk                                | Zacha, Jac                          | Jac Zacha             | tt0235011 |
| 1745359288 | 2003 | 2002 | P.S. Your Cat Is Dead                        | P.S. Your Cat Is Dead!                       | Guttenberg, Steve                   | Steve Guttenberg      | tt0245341 |
| 1769977882 | 1988 | 1988 | Tougher Than Leather                         | Tougher Than Leather                         | Rubin, Rick                         | Rick Rubin            | tt0096291 |

|            |      |      |                                |                                |                                      |                      |           |
|------------|------|------|--------------------------------|--------------------------------|--------------------------------------|----------------------|-----------|
| 1746235325 | 1977 | 1977 | Bare Knuckles                  | Bare Knuckles                  | Edmonds, Don                         | Don Edmonds          | tt0075727 |
| 1746218741 | 1975 | 1975 | Cover Girl Models              | Cover Girl Models              | Santiago, Cirio                      | Cirio H. Santiago    | tt0072827 |
| 1746218690 | 1972 | 1972 | Bad Company                    | Bad Company                    | Benton, Robert                       | Robert Benton        | tt0068245 |
| 1746235429 | 1979 | 1979 | Dirt                           | Dirt                           | Karson, Eric; Naylor, Cal            | Eric Karson          | tt0079055 |
| 1746218870 | 1976 | 1975 | The Mysterious Monsters        | The Mysterious Monsters        | Guenette, Robert                     | Robert Guenette      | tt0073427 |
| 1746394238 | 1981 | 1981 | The Pursuit of D. B. Cooper    | The Pursuit of D.B. Cooper     | Spottiswoode, Roger                  | Roger Spottiswoode   | tt0082958 |
| 1746235328 | 1974 | 1974 | How to Seduce a Woman          | How to Seduce a Woman          | Martin, Charles                      | Charles Martin       | tt0071631 |
| 1745340972 | 2003 | 2003 | What Alice Found               | What Alice Found               | Bell, A. Dean                        | A. Dean Bell         | tt0343172 |
| 1746258553 | 1976 | 1975 | Breakheart Pass                | Breakheart Pass                | Gries, Tom                           | Tom Gries            | tt0072735 |
| 1746394192 | 1982 | 1982 | Six Weeks                      | Six Weeks                      | Bill, Tony                           | Tony Bill            | tt0084691 |
| 1746455709 | 1999 | 1999 | Trailer -- The Movie           | Trailer: The Movie             | McCrudden, Ian                       | Ian McCrudden        | tt0188247 |
| 1746455806 | 1998 | 1998 | A Civil Action                 | A Civil Action                 | Zaillian , Steven                    | Steven Zaillian      | tt0120633 |
| 1745332594 | 2011 | 2010 | Journey from Zanskar           | Journey from Zanskar           | Marx, Frederick                      | Frederick Marx       | tt1325702 |
| 1746438714 | 2000 | 2000 | Mercy Streets                  | Mercy Streets                  | Gunn, Jon                            | Jon Gunn             | tt0243415 |
| 1745309476 | 2005 | 2004 | On the Outs                    | On the Outs                    | Silverbush, Lori ; Skolnik, Michael  | Lori Silverbush      | tt0389235 |
| 1745394890 | 2010 | 2009 | Handsome Harry                 | Handsome Harry                 | Gordon, Bette                        | Bette Gordon         | tt1318001 |
| 1746235226 | 1972 | 1972 | Daughters of Satan             | Daughters of Satan             | Morse, Hollingsworth                 | Hollingsworth Morse  | tt0068448 |
| 1745294027 | 2007 | 2006 | Rock the Bells                 | Rock the Bells                 | Hennelly, Denis Henry ; Suchan, Case | Denis Henry Hennelly | tt0800181 |
| 1746456095 | 1996 | 1996 | A Perfect Candidate            | A Perfect Candidate            | Cutler, R. J.; Van Taylor, David     | R.J. Cutler          | tt0117320 |
| 1746438508 | 1997 | 1997 | Soul in the Hole               | Soul in the Hole               | Gardner, Danielle                    | Danielle Gardner     | tt0122728 |
| 1746422302 | 1997 | 1997 | Going All the Way              | Going All the Way              | Pellington, Mark                     | Mark Pellington      | tt0119209 |
| 1746419925 | 1983 | 1983 | Return Engagement              | Return Engagement              | Rudolph, Alan                        | Alan Rudolph         | tt0086188 |
| 1746219427 | 1974 | 1974 | The Trial of Billy Jack        | The Trial of Billy Jack        | Laughlin, Frank                      | Tom Laughlin         | tt0072317 |
| 1746269502 | 1976 | 1976 | Joe Panther                    | Joe Panther                    | Krasny, Paul                         | Paul Krasny          | tt0074716 |
| 1745302805 | 2007 | 2006 | The Hip Hop Project            | The Hip Hop Project            | Ruskin, Matt                         | Matt Ruskin          | tt0800272 |
| 1746394511 | 1986 | 1986 | Hoosiers                       | Hoosiers                       | Anspaugh, David                      | David Anspaugh       | tt0091217 |
| 1745359624 | 2003 | 2002 | Returning Mickey Stern         | Returning Mickey Stern         | Prywes, Michael                      | Michael Prywes       | tt0259538 |
| 1745396038 | 2009 | 2009 | Outrage                        | Outrage                        | Dick, Kirby                          | Kirby Dick           | tt1049400 |
| 1745282891 | 2005 | 2005 | G                              | 5                              | Cherot, Christopher Scott            | Dov Engelberg        | tt0469874 |
| 1745358040 | 2010 | 2010 | The Nature of Existence        | The Nature of Existence        | Nygard, Roger                        | Roger Nygard         | tt1196672 |
| 1745374909 | 2008 | 2007 | Never Forever                  | Never Forever                  | Kim, Gina                            | Gina Kim             | tt0817544 |
| 1746422631 | 1992 | 1992 | CrissCross                     | CrissCross                     | Menges, Chris                        | Chris Menges         | tt0104027 |
| 1745359149 | 2003 | 2002 | The Slaughter Rule             | The Slaughter Rule             | Smith, Andrew; Smith, Alex           | Alex Smith           | tt0266971 |
| 1746210763 | 1973 | 1973 | Blume in Love                  | Blume in Love                  | Mazursky, Paul                       | Paul Mazursky        | tt0069808 |
| 1746438191 | 1998 | 1998 | The Scottish Tale              | The Scottish Tale              | Polhemus, Mackinlay                  | Mack Polhemus        | tt0177206 |
| 1746422617 | 1999 | 1999 | The Thirteenth Floor           | The Thirteenth Floor           | Rusnak, Josef                        | Josef Rusnak         | tt0139809 |
| 1746423474 | 1997 | 1997 | The Matchmaker                 | The MatchMaker                 | Joffe, Mark                          | Mark Joffe           | tt0119632 |
| 1746455894 | 1994 | 1994 | The Girl in the Watermelon     | The Girl in the Watermelon     | Castilla, Sergio M.                  | Sergio M. Castilla   | tt0109902 |
| 1745374038 | 2003 | 2003 | Jon E. Edwards Is in Love      | Jon E. Edwards Is in Love      | Bradley, Chris; La Brache, Kyle      | Chris Bradley        | tt0358547 |
| 1745309565 | 2005 | 2005 | Naked in Ashes                 | Naked in Ashes                 | Fouce, Paula                         | Paula Fouce          | tt0481589 |
| 1746408720 | 1984 | 1984 | Falling in Love                | Falling in Love                | Grosbard, Ulu                        | Ulu Grosbard         | tt0087233 |
| 1746235065 | 1972 | 1972 | Young Winston                  | Young Winston                  | Attenborough, Richard                | Richard Attenborough | tt0069528 |
| 1746421957 | 1996 | 1996 | Mrs. Winterbourne              | Mrs. Winterbourne              | Benjamin, Richard                    | Richard Benjamin     | tt0117104 |
| 1746454534 | 1995 | 1995 | Johnny Mnemonic                | Johnny Mnemonic                | Longo, Robert                        | Robert Longo         | tt0113481 |
| 1746257225 | 1975 | 1975 | Murph the Surf                 | Murph the Surf                 | Chomsky, Marvin                      | Marvin J. Chomsky    | tt0073302 |
| 1745302792 | 2007 | 2007 | Steep                          | Steep                          | Obenhaus, Mark                       | Adetoro Makinde      | tt1135947 |
| 1746210247 | 1971 | 1971 | Make a Face                    | Make a Face                    | Sperling, Karen                      | Karen Sperling       | tt0243400 |
| 1746409727 | 1992 | 1992 | Breaking the Rules             | Breaking the Rules             | Israel, Neal                         | Neal Israel          | tt0103877 |
| 1746393665 | 1988 | 1988 | Distant Thunder                | Distant Thunder                | Rosenthal, Rick                      | Rick Rosenthal       | tt0095036 |
| 1745302767 | 2005 | 2005 | Side Effects                   | Side Effects                   | Slattery-Moschkau, Katherine         | Kathleen Slattery    | tt0438427 |
| 1746422526 | 1994 | 1993 | American Cyborg: Steel Warrior | American Cyborg: Steel Warrior | Davidson, Boaz                       | Boaz Davidson        | tt0109098 |
| 1746394523 | 1984 | 1984 | Flashpoint                     | Flashpoint                     | Tannen, William                      | William Tannen       | tt0087268 |
| 1746438719 | 1995 | 1995 | Dirty Money                    | Dirty Money                    | Bruce, James                         | James Bruce          | tt0109632 |
| 1745302420 | 2005 | 2005 | North Country                  | North Country                  | Caro, Niki                           | Niki Caro            | tt0395972 |
| 1745357639 | 2010 | 2010 | Alice in Wonderland            | Alice in Wonderland            | Burton, Tim                          | James Fotopoulos     | tt2049386 |
| 1745302938 | 2006 | 2005 | Keeping Mum                    | Keeping Mum                    | Johnson, Niall                       | Niall Johnson        | tt0444653 |
| 1746218868 | 1974 | 1974 | Tough                          | Tough                          | Jackson, Horace                      | Horace Jackson       | tt0200753 |

|            |      |      |                                                 |                                                 |                                 |                        |           |
|------------|------|------|-------------------------------------------------|-------------------------------------------------|---------------------------------|------------------------|-----------|
| 1746218906 | 1978 | 1978 | Skateboard                                      | Skateboard                                      | Gage, George                    | George Gage            | tt0076721 |
| 1746422166 | 1995 | 1995 | Lotto Land                                      | Lotto Land                                      | Rubino, John                    | John Rubino            | tt0113695 |
| 1746394156 | 1987 | 1987 | Treasure of the Moon Goddess                    | Treasure of the Moon Goddess                    | Agraz, Joseph Louis             | José Luis García Agraz | tt0094179 |
| 1745340802 | 2004 | 2004 | Being Julia                                     | Being Julia                                     | Szabé, István                   | István Szabó           | tt0340012 |
| 1746218835 | 1972 | 1972 | Sweet Kill                                      | Sweet Kill                                      | Hanson, Curtis                  | Curtis Hanson          | tt0065424 |
| 1745358556 | 2011 | 2010 | Just Like Us                                    | Just Like Us                                    | Ahmed, Ahmed                    | Ahmed Ahmed            | tt1511400 |
| 1746393347 | 1983 | 1983 | Octopussy                                       | Octopussy                                       | Glen, John                      | John Glen              | tt0086034 |
| 1746409961 | 1982 | 1981 | Porky's                                         | Porky's                                         | Clark, Bob                      | Bob Clark              | tt0084522 |
| 1746235447 | 1979 | 1979 | The Runner Stumbles                             | The Runner Stumbles                             | Kramer, Stanley                 | Stanley Kramer         | tt0079831 |
| 1746382231 | 1982 | 1982 | A Stranger Is Watching                          | A Stranger Is Watching                          | Cunningham, Sean S.             | Sean S. Cunningham     | tt0084735 |
| 1746409461 | 1991 | 1991 | Delirious                                       | Delirious                                       | Mankiewicz, Tom                 | Tom Mankiewicz         | tt0101701 |
| 1746235371 | 1973 | 1973 | Baxter!                                         | Baxter!                                         | Jeffries, Lionel                | Lionel Jeffries        | tt0069770 |
| 1745293552 | 2006 | 2006 | Vacationland                                    | Vacationland                                    | Verow, Todd                     | Todd Verow             | tt0480048 |
| 1746210275 | 1970 | 1970 | The Baby Maker                                  | The Baby Maker                                  | Bridges, James                  | James Bridges          | tt0065441 |
| 1746409987 | 1986 | 1986 | On the Edge                                     | On the Edge                                     | Nilsson, Rob                    | Rob Nilsson            | tt0091677 |
| 1746234733 | 1972 | 1972 | Dirty Little Billy                              | Dirty Little Billy                              | Dragoti, Stan                   | Stan Dragoti           | tt0068487 |
| 1746408500 | 1984 | 1983 | Sahara                                          | Sahara                                          | McLaglen, Andrew V.             | Andrew V. McLaglen     | tt0086232 |
| 1745331791 | 2011 | 2010 | Everyday Sunshine: The Story of Fishbone        | Everyday Sunshine: The Story of Fishbone        | Anderson, Lev; Metzler, Chris   | Lev Anderson           | tt0840358 |
| 1746394157 | 1986 | 1986 | The Annihilators                                | Annihilator                                     | Sellier, Jr., Charles E.        | Michael Chapman        | tt0090649 |
| 1746455848 | 1996 | 1996 | Walking and Talking                             | Walking and Talking                             | Holofcener, Nicole              | Nicole Holofcener      | tt0118113 |
| 1745359239 | 2008 | 2007 | Surfwise                                        | Surfwise                                        | Pray, Doug                      | Doug Pray              | tt0479547 |
| 1746435896 | 1989 | 1989 | Scenes from the Class Struggle in Beverly Hills | Scenes from the Class Struggle in Beverly Hills | Bartel, Paul                    | Paul Bartel            | tt0098261 |
| 1746235448 | 1971 | 1971 | Joe Hill                                        | Joe Hill                                        | Widerberg, Bo                   | Bo Widerberg           | tt0067276 |
| 1745302928 | 2007 | 2006 | Steel City                                      | Steel City                                      | Jun, Brian                      | Brian Jun              | tt0439833 |
| 1745309236 | 2005 | 2005 | James Dean Forever Young                        | James Dean: Forever Young                       | Sheridan, Michael J.            | Michael J. Sheridan    | tt0472115 |
| 1745309500 | 2004 | 2004 | Anonymous                                       | Anonymous                                       | Verow, Todd                     | Rayya Elias            | tt0465896 |
| 1745372430 | 2008 | 2007 | The First Saturday in May                       | The First Saturday in May                       | Hennegan, Brad ; Hennegan, John | Brad Hennegan          | tt1003115 |
| 1745272550 | 2000 | 2001 | Social Misfits                                  | Social Misfits                                  | Villar-Rios, Rene               | Rene Villar Rios       | tt0228878 |
| 1745302623 | 2005 | 2005 | Supercross                                      | Supercross                                      | Boyum, Steve                    | Steve Boyum            | tt0403016 |
| 1745342076 | 2009 | 2009 | The Golden Boys                                 | Golden Boy                                      | Adams, Daniel                   | William Lu             | tt1344392 |
| 1746419607 | 1988 | 1988 | Betrayed                                        | Betrayed                                        | Costa-Gavras                    | Costa                  | tt0094731 |
| 1746202824 | 1970 | 1970 | Move                                            | Move                                            | Rosenberg, Stuart               | Stuart Rosenberg       | tt0066102 |
| 1746382248 | 1983 | 1984 | In Our Hands                                    | In Our Hands                                    |                                 | Robert Richter         | tt0087466 |
| 1746410697 | 1987 | 1987 | Ironweed                                        | Ironweed                                        | Babenco, Hector                 | Hector Babenco         | tt0093277 |
| 1746235033 | 1973 | 1973 | One Little Indian                               | One Little Indian                               | McEveety, Bernard               | Bernard McEveety       | tt0070481 |
| 1746235451 | 1977 | 1977 | The Domino Principle                            | The Domino Principle                            | Kramer, Stanley                 | Stanley Kramer         | tt0075950 |
| 1746218834 | 1973 | 1973 | The Stone Killer                                | The Stone Killer                                | Winner, Michael                 | Michael Winner         | tt0070736 |
| 1745271792 | 2000 | 1999 | Shadow Boxers                                   | Shadow Boxers                                   | Bankowsky, Katya                | Katya Bankowsky        | tt0199013 |
| 1745375297 | 2011 | 2010 | The Last Godfather                              | The Last Godfather                              |                                 | Hyung                  | tt1584131 |
| 2007989478 | 1993 | 1992 | That Night                                      | That Night                                      | Bolotin, Craig                  | Craig Bolotin          | tt0105572 |
| 1745375167 | 2011 | 2010 | An Invisible Sign                               | An Invisible Sign                               | Agrelo, Marilyn                 | Marilyn Agrelo         | tt1212454 |
| 1745293981 | 2007 | 2007 | Stardust                                        | Stardust                                        | Vaughn, Matthew                 | Matthew Vaughn         | tt0486655 |
| 1746454549 | 1999 | 1999 | The 24 Hour Woman                               | The 24 Hour Woman                               | Savoca, Nancy                   | Nancy Savoca           | tt0138279 |
| 1745359399 | 2010 | 2009 | Mother and Child                                | Mother and Child                                | García, Rodrigo                 | Rodrigo García         | tt1121977 |
| 1746210564 | 1971 | 1970 | Figures in a Landscape                          | Figures in a Landscape                          | Losey, Joseph                   | Joseph Losey           | tt0065720 |
| 1745342704 | 2011 | 2010 | Good Neighbors                                  | The Good Neighbor                               | Tierney, Jacob                  | Jacob Vaughan          | tt1792816 |
| 1746421719 | 1999 | 1998 | I Woke Up Early the Day I Died                  | I Woke Up Early the Day I Died                  | Iliopoulos, Aris                | Aris Iliopoulos        | tt0125211 |
| 1746219642 | 1976 | 1976 | Harry and Walter Go To New York                 | Harry and Walter Go to New York                 | Rydell, Mark                    | Mark Rydell            | tt0074608 |
| 1745293770 | 2007 | 2007 | Jimmy Carter Man from Plains                    | Jimmy Carter Man from Plains                    | Demme, Jonathan                 | Jonathan Demme         | tt0913958 |
| 1746421301 | 1994 | 1994 | Immortal Beloved                                | Immortal Beloved                                | Rose, Bernard                   | Bernard Rose           | tt0110116 |
| 1745393781 | 2011 | 2010 | Exporting Raymond                               | Exporting Raymond                               | Rosenthal, Phil                 | Philip Rosenthal       | tt1356763 |
| 1745282878 | 2005 | 2004 | Making Grace                                    | Making Grace                                    | Gund, Catherine                 | Catherine Gund         | tt0475333 |
| 1746393894 | 1986 | 1986 | Hollywood Vice Squad                            | Hollywood Vice Squad                            | Spheeris, Penelope              | Penelope Spheeris      | tt0091213 |
| 1746210945 | 1971 | 1971 | The Statue                                      | The Statue                                      | Amateau, Rod                    | Rod Amateau            | tt0067791 |
| 1746419175 | 1987 | 1987 | In the Mood                                     | In the Mood                                     | Robinson, Phil Alden            | Phil Alden Robinson    | tt0093253 |
| 1746249159 | 1978 | 1977 | Nightmare in Blood                              | Nightmare in Blood                              | Stanley, John                   | John Stanley           | tt0077994 |
| 1746219382 | 1973 | 1973 | Checkmate                                       | Checkmate                                       | Amero, Lem                      | Lem Amero              | tt0179123 |

|            |      |      |                                   |                                   |                                    |                        |           |
|------------|------|------|-----------------------------------|-----------------------------------|------------------------------------|------------------------|-----------|
| 1746210829 | 1970 | 1970 | Cannon for Cordoba                | Cannon for Cordoba                | Wendkos, Paul                      | Paul Wendkos           | tt0065520 |
| 1746235252 | 1976 | 1976 | Lifeguard                         | Lifeguard                         | Petrie, Daniel                     | Daniel Petrie          | tt0074798 |
| 1746409765 | 1981 | 1980 | Cardiac Arrest                    | Cardiac Arrest                    | Mintz, Murray                      | Murray Mintz           | tt0080497 |
| 1746422958 | 1994 | 1994 | Chasers                           | Chasers                           | Hopper, Dennis                     | Dennis Hopper          | tt0109403 |
| 1746423498 | 1997 | 1996 | Princeton: Images of a University | Princeton: Images of a University | Puglia, Gerardo                    | Gerardo Puglia         | tt1376226 |
| 1746433900 | 1998 | 1998 | The Last Days                     | The Last Days                     | Moll, James                        | James Moll             | tt0174852 |
| 1746211255 | 1970 | 1970 | Darker Than Amber                 | Darker Than Amber                 | Clouse, Robert                     | Robert Clouse          | tt0065610 |
| 1745341994 | 2008 | 2008 | Secrecy                           | Secrecy                           | Moss, Robb ; Galison, Peter        | Peter Galison          | tt1157709 |
| 1745396203 | 2010 | 2010 | Unstoppable                       | Unstoppable                       | Scott, Tony                        | Tony Scott             | tt0477080 |
| 1746421247 | 1999 | 1998 | Broken Vessels                    | Broken Vessels                    | Ziehl, Scott                       | Scott Ziehl            | tt0149964 |
| 1769974246 | 1970 | 1970 | The Hot House                     | The Hot House                     | West, Al                           | Armand Weston          | tt0220530 |
| 1746269869 | 1978 | 1978 | Remember My Name                  | Remember My Name                  | Rudolph, Alan                      | Alan Rudolph           | tt0078150 |
| 1746435428 | 1992 | 1992 | Passed Away                       | Passed Away                       | Peters, Charlie                    | Charlie Peters         | tt0105103 |
| 1745342016 | 2002 | 2002 | Last Dance                        | Last Dance                        | Bank, Mirra                        | Mirra Bank             | tt0316160 |
| 1745359291 | 2001 | 2001 | W.I.S.O.R.                        | W.I.S.O.R.                        | Negroponce, Michel                 | Michel Negroponce      | tt0288880 |
| 1745359267 | 2003 | 2003 | Out of Time                       | Out of Time                       | Franklin, Carl                     | Omi Vaidya             | tt0378509 |
| 1745358705 | 2010 | 2010 | Open Five                         | Open Five                         | Audley, Kentucker                  | Kentucker Audley       | tt1474816 |
| 1746420152 | 1994 | 1993 | Where the Rivers Flow North       | Where the Rivers Flow North       | Craven, Jay                        | Jay Craven             | tt0108557 |
| 1745359409 | 2004 | 2004 | Mind the Gap                      | Mind the Gap                      | Schaeffer, Eric                    | Eric Schaeffer         | tt0373152 |
| 1746235683 | 1977 | 1977 | Fraternity Row                    | Fraternity Row                    | Tobin, Thomas J.                   | Thomas J. Tobin        | tt0076052 |
| 1746410578 | 1982 | 1982 | Sorceress                         | Sorceress                         | Stuart, Brian                      | Jack Hill              | tt0086340 |
| 1746210626 | 1971 | 1971 | Such Good Friends                 | Such Good Friends                 | Preminger, Otto                    | Otto Preminger         | tt0067801 |
| 1745373763 | 2004 | 2004 | Closer                            | Closer                            | Nichols, Mike                      | Andre Mallette         | tt0486094 |
| 1746419615 | 1987 | 1987 | Street Smart                      | Street Smart                      | Schatzberg, Jerry                  | Jerry Schatzberg       | tt0094056 |
| 1746454461 | 1997 | 1996 | Flipping                          | Flipping                          | Mitchell, Gene                     | Gene Mitchell          | tt0116323 |
| 1746438504 | 1999 | 1999 | Do You Wanna Dance?               | Do You Wanna Dance?               | Nickles, Michael A.                | Michael A. Nickles     | tt0118994 |
| 1746420112 | 1992 | 1992 | Double Threat                     | Double Threat                     | Prior, David A.                    | David A. Prior         | tt0104134 |
| 1746454992 | 1995 | 1994 | Little Odessa                     | Little Odessa                     | Gray, James                        | James Gray             | tt0110365 |
| 1745358951 | 2008 | 2008 | Fall of Hyperion                  | Fall of Hyperion                  | Piano, Rex                         | Rex Piano              | tt1285162 |
| 1745340076 | 2004 | 2003 | Collateral Damages                | Collateral Damages                | Sauret, Etienne                    | Étienne Sauret         | tt0368656 |
| 1745272162 | 2000 | 1999 | Wirey Spindell                    | Wirey Spindell                    | Schaeffer, Eric                    | Eric Schaeffer         | tt0153866 |
| 1746409481 | 1986 | 1986 | The Malibu Bikini Shop            | The Malibu Bikini Shop            | Wechter, David                     | David Wechter          | tt0089538 |
| 1745302660 | 2006 | 2006 | Copying Beethoven                 | Copying Beethoven                 | Holland, Agnieszka                 | Agnieszka Holland      | tt0424908 |
| 1745341230 | 2001 | 2001 | Iris                              | Iris                              | Eyre, Richard                      | Richard Eyre           | tt0280778 |
| 1746235929 | 1974 | 1974 | Mama's Dirty Girls                | Mama's Dirty Girls                | Hayes, John                        | John Hayes             | tt0071802 |
| 1745302808 | 2007 | 2007 | Resurrecting the Champ            | Resurrecting the Champ            | Lurie, Rod                         | Rod Lurie              | tt0416185 |
| 1745375282 | 2011 | 2010 | Blackmail Boys                    | Blackmail Boys                    | Shumanski, Bernard; Shumanski, Ric | Bernard Shumanski      | tt1784365 |
| 1746393124 | 1985 | 1985 | Fast Forward                      | Fast Forward                      | Poitier, Sidney                    | Sidney Poitier         | tt0089129 |
| 1746554924 | 1963 | 1963 | Come Fly with Me                  | Come Fly with Me                  | Levin, Henry                       | Henry Levin            | tt0056941 |
| 1746393322 | 1985 | 1984 | Fear City                         | Fear City                         | Ferrara, Abel                      | Abel Ferrara           | tt0087247 |
| 1745302710 | 2006 | 2006 | Facing the Giants                 | Facing the Giants                 | Kendrick, Alex                     | Alex Kendrick          | tt0805526 |
| 1746393080 | 1987 | 1987 | Pretty Smart                      | Pretty Smart                      | Logothetis, Dimitri                | Dimitri Logothetis     | tt0091789 |
| 1745341853 | 2008 | 2008 | The Pleasure of Being Robbed      | The Pleasure of Being Robbed      | Safdie, Josh                       | Josh Safdie            | tt1189259 |
| 1746219169 | 1975 | 1975 | The Swinging Barmaids             | The Swinging Barmaids             | Trikonis, Gus                      | Gus Trikonis           | tt0073773 |
| 1746419378 | 1994 | 1994 | I Like It Like That               | I Like It Like That               | Martin, Darnell                    | Darnell Martin         | tt0110091 |
| 1745374475 | 2010 | 2009 | Survival of the Dead              | Survival of the Dead              | Romero, George A.                  | George A. Romero       | tt1134854 |
| 1746218587 | 1974 | 1973 | Teenage Tramp                     | Teenage Tramp                     | Holden, Anton                      | Anton Holden           | tt0128719 |
| 1746420401 | 1990 | 1989 | Think Big                         | Think Big                         | Turteltaub, Jon                    | Jon Turteltaub         | tt0100772 |
| 1745342666 | 2008 | 2008 | Diminished Capacity               | Diminished Capacity               | Kinney, Terry                      | Terry Kinney           | tt1007950 |
| 1746420244 | 1983 | 1982 | Echoes                            | Echoes                            | Seidelman, Arthur Allan            | Arthur Allan Seidelman | tt0085471 |
| 1746419913 | 1990 | 1990 | Vital Signs                       | Vital Signs                       | Silver, Marisa                     | Marisa Silver          | tt0100879 |
| 1746393965 | 1987 | 1987 | Where the Heart Roams             | Where the Heart Roams             | Csicsery, George Paul              | George Paul Csicsery   | tt0163906 |
| 1746235482 | 1974 | 1974 | The Crazy World of Julius Vrooder | The Crazy World of Julius Vrooder | Hiller, Arthur                     | Arthur Hiller          | tt0071370 |
| 1746235098 | 1971 | 1971 | Fortune and Men's Eyes            | Fortune and Men's Eyes            | Hart, Harvey                       | Harvey Hart            | tt0067112 |
| 1745294028 | 2006 | 2006 | Stolen                            | Stolen                            | Dreyfus, Rebecca                   | Massimo Messina        | tt2954078 |
| 1746235024 | 1973 | 1973 | Alabama's Ghost                   | Alabama's Ghost                   | Hobbs, Fredric                     | Fredric Hobbs          | tt0068187 |
| 1745394120 | 2010 | 2009 | The Art of the Steal              | The Art of the Steal              | Argott, Don                        | Don Argott             | tt1326733 |



|            |      |      |                                         |                                         |                                        |                     |           |
|------------|------|------|-----------------------------------------|-----------------------------------------|----------------------------------------|---------------------|-----------|
| 1746422086 | 1996 | 1995 | Pharaoh's Army                          | Pharaoh's Army                          | Henson, Robby                          | Robby Henson        | tt0114122 |
| 1745342046 | 2011 | 2010 | Mooz-lum                                | Mooz Lum                                | Basir, Qasim                           | Qasim Basir         | tt1450328 |
| 1746437119 | 1997 | 1996 | The Unveiling                           | The Unveiling                           | Evans, Rodney                          | Rodney Evans        | tt0307619 |
| 1745359332 | 2004 | 2004 | The Deviants                            | The Deviants                            | Waterer, Reid                          | Reid Waterer        | tt0322005 |
| 1746210680 | 1971 | 1971 | A Clockwork Orange                      | A Clockwork Orange                      | Kubrick, Stanley                       | Stanley Kubrick     | tt0066921 |
| 1746235658 | 1977 | 1976 | The Littlest Horse Thieves              | The Littlest Horse Thieves              | Jarrott, Charles                       | Charles Jarrott     | tt0076320 |
| 1745282739 | 2005 | 2005 | An Unfinished Life                      | An Unfinished Life                      | Hallström, Lasse                       | Lasse Hallström     | tt0350261 |
| 1746218865 | 1973 | 1973 | The Student Teachers                    | The Student Teachers                    | Kaplan, Jonathan                       | Jonathan Kaplan     | tt0070743 |
| 1745272258 | 2000 | 1999 | Soft Toilet Seats                       | Soft Toilet Seats                       | Valinsky, Tina                         | Tina Valinsky       | tt0171764 |
| 1745374121 | 2004 | 2003 | Orwell Rolls in His Grave               | Orwell Rolls in His Grave               | Pappas, Robert Kane                    | Robert Kane Pappas  | tt0410407 |
| 1746422032 | 1996 | 1995 | Headless Body in Topless Bar            | Headless Body in Topless Bar            | Bruce, James                           | James Bruce         | tt0113276 |
| 1746218841 | 1976 | 1976 | The Duchess and the Dirtwater Fox       | The Duchess and the Dirtwater Fox       | Frank, Melvin                          | Melvin Frank        | tt0074441 |
| 1769973214 | 1970 | 1970 | Tuck Me In                              | Tuck Me In                              | Meola, Michael                         | Michael Meola       | tt0260443 |
| 1745359771 | 2010 | 2010 | The Happy Poet                          | The Happy Poet                          | Gordon, Paul                           | Paul Gordon         | tt1605765 |
| 1746435898 | 1989 | 1989 | True Believer                           | True Believer                           | Ruben, Joseph                          | Joseph Ruben        | tt0098524 |
| 1746250745 | 1978 | 1978 | Slow Dancing in the Big City            | Slow Dancing in the Big City            | Avildsen, John G.                      | John G. Avildsen    | tt0078278 |
| 1746423506 | 1997 | 1996 | Brassed Off                             | Brassed Off                             | Herman, Mark                           | Mark Herman         | tt0115744 |
| 1746209970 | 1970 | 1970 | The Angel Levine                        | The Angel Levine                        | Kadár, Ján                             | Ján Kadár           | tt0065400 |
| 1745374185 | 2004 | 2004 | The Forgotten                           | The Forgotten                           | Ruben, Joseph                          | Joseph Ruben        | tt0356618 |
| 1769973197 | 1970 | 1970 | Norma                                   | Norma                                   | Roter, Ted                             | Ted Roter           | tt0126545 |
| 1746422120 | 1998 | 1997 | Sunsets                                 | Sunsets                                 | Idemoto, Michael ; Nakamura, Eric      | Michael Aki         | tt0122739 |
| 1746455789 | 1997 | 1997 | The Lay of the Land                     | The Lay of the Land                     | Arrick, Larry                          | Larry Arrick        | tt0123953 |
| 1745359148 | 2010 | 2010 | For Once in My Life                     | For Once in My Life                     | Bigham, Jim; Moormann, Mark            | Jim Bigham          | tt1539288 |
| 1746455996 | 1995 | 1994 | The Last Good Time                      | The Last Good Time                      | Balaban, Bob                           | Bob Balaban         | tt0110306 |
| 1746421982 | 1997 | 1997 | Most Wanted                             | Most Wanted                             | Hogan, David Glenn                     | David Hogan         | tt0119709 |
| 1746393415 | 1982 | 1982 | Fighting Back                           | Fighting Back                           | Teague, Lewis                          | Lewis Teague        | tt0083936 |
| 1745359379 | 2011 | 2010 | Burning Palms                           | Burning Palms                           | Landon, Christopher B.                 | Christopher Landon  | tt1283887 |
| 1746455889 | 1997 | 1997 | 100 Proof                               | 100 Proof                               | Horton, Jeremy                         | Jeremy Horton       | tt0124268 |
| 1746421061 | 1988 | 1988 | Mr. North                               | Mr. North                               | Huston, Danny                          | Danny Huston        | tt0095665 |
| 1746235197 | 1977 | 1977 | Fire Sale                               | Fire Sale                               | Arkin, Alan                            | Alan Arkin          | tt0076029 |
| 1746422029 | 1998 | 1998 | The Hi-Lo Country                       | The Hi Lo Country                       | Frears, Stephen                        | Stephen Frears      | tt0120699 |
| 1746455106 | 1996 | 1995 | Dadetown                                | Dadetown                                | Hexter, Russ                           | Russ Hexter         | tt0112777 |
| 1746423488 | 1994 | 1995 | A Gift from Heaven                      | A Gift from Heaven                      | Lucarelli, Jack                        | Jack Lucarelli      | tt0109897 |
| 1745394581 | 2010 | 2010 | Winston Churchill: Walking with Destiny | Winston Churchill: Walking with Destiny | Trank, Richard                         | Richard Trank       | tt1727596 |
| 1745373228 | 2004 | 2003 | Saints and Soldiers                     | Saints and Soldiers                     | Little, Ryan                           | Ryan Little         | tt0373283 |
| 1746421956 | 1995 | 1995 | Dead Man Walking                        | Dead Man Walking                        | Robbins, Tim                           | Tim Robbins         | tt0112818 |
| 1746435298 | 1995 | 1995 | The Underneath                          | The Underneath                          | Soderbergh, Steven                     | Steven Soderbergh   | tt0114788 |
| 1745309622 | 2007 | 2007 | The Man Who Souled the World            | The Man Who Souled the World            | Hill, Mike                             | Mike Hill           | tt0924461 |
| 1745271812 | 2000 | 2000 | My 5 Wives                              | My 5 Wives                              | Furie, Sidney J.                       | Sidney J. Furie     | tt0216930 |
| 1746218593 | 1970 | 1970 | Tarzan's Deadly Silence                 | Tarzan's Deadly Silence                 | Friend, Robert L.; Dobkin, Lawrence    | Robert L. Friend    | tt0066438 |
| 1746235870 | 1976 | 1975 | Mysteries from Beyond Earth             | Mysteries from Beyond Earth             | Gale, George                           | George Gale         | tt0163116 |
| 1745272026 | 2000 | 2000 | What's Cooking?                         | What's Cooking?                         | Chadha, Gurinder                       | Gurinder Chadha     | tt0197096 |
| 1745282915 | 2006 | 2006 | Memoirs of My Nervous Illness           | Memoirs of My Nervous Illness           | Hobbs, Julian P.                       | Julian P. Hobbs     | tt0479098 |
| 1746455638 | 1994 | 1994 | The Peyote Road                         | The Peyote Road                         | Rhine, Gary ; Moreno, Fidel; Cousineau | Phil Cousineau      | tt0110822 |
| 1746420254 | 1990 | 1990 | Torn Apart                              | Torn Apart                              | Fisher, Jack                           | Jack Fisher         | tt0100800 |
| 1745282827 | 2004 | 2003 | Virgin                                  | Virgin                                  | Kampmeier, Deborah                     | Deborah Kampmeier   | tt0368411 |
| 1746235540 | 1977 | 1977 | On the Line                             | On the Line                             | Margolis, Barbara; Weiss, Marc N.      | Barbara Margolis    | tt0075010 |
| 1745358666 | 2002 | 2002 | Just a Kiss                             | Just a Kiss                             | Stevens, Fisher                        | Fisher Stevens      | tt0245479 |
| 1746257235 | 1975 | 1974 | Journey Through the Past                | Journey Through the Past                | Young, Neil                            | Neil Young          | tt0068776 |
| 1746218813 | 1972 | 1972 | The Legend of Nigger Charley            | The Legend of Nigger Charley            | Goldman, Martin                        | Martin Goldman      | tt0068838 |
| 1746218848 | 1977 | 1977 | Cracking Up                             | Cracking Up                             | Goren, Rowby; Staley, Chuck            | Rowby Goren         | tt0075886 |
| 1745293641 | 2006 | 2005 | I Am a Sex Addict                       | I Am a Sex Addict                       | Zahedi, Caveh                          | Caveh Zahedi        | tt0428649 |
| 1746219431 | 1972 | 1972 | Frenzy                                  | Frenzy                                  | Hitchcock, Alfred                      | Alfred Hitchcock    | tt0068611 |
| 1746235204 | 1974 | 1973 | Journey to the Outer Limits             | Journey to the Outer Limits             | Grasshoff, Alex                        | Alexander Grasshoff | tt0070249 |
| 1745293858 | 2005 | 2005 | Duma                                    | Duma                                    | Ballard, Carroll                       | Carroll Ballard     | tt0361715 |
| 1745302328 | 2005 | 2005 | Aliens of the Deep                      | Aliens of the Deep                      | Cameron, James; Quale, Steven          | James Cameron       | tt0417415 |
| 1746409806 | 1992 | 1992 | White Trash                             | White Trash                             | Baker, Fred                            | Fred Baker          | tt0105814 |

|            |      |      |                                            |                                            |                              |                     |           |
|------------|------|------|--------------------------------------------|--------------------------------------------|------------------------------|---------------------|-----------|
| 1746211241 | 1972 | 1972 | The War Between Men and Women              | The War Between Men and Women              | Shavelson, Melville          | Melville Shavelson  | tt0069483 |
| 1746235025 | 1975 | 1975 | The Four Deuces                            | The Four Deuces                            | Bushnell, William H.         | William H. Bushnell | tt0073011 |
| 1746421735 | 1989 | 1989 | Signs of Life                              | Signs of Life                              | Coles, John David            | John David Coles    | tt0098330 |
| 1746198701 | 1970 | 1970 | The Hard Road                              | The Hard Road                              | Graver, Gary                 | Gary Graver         | tt0124707 |
| 1746219641 | 1980 | 1980 | Leo and Loree                              | Leo and Loree                              | Paris, Jerry                 | Jerry Paris         | tt0081044 |
| 1746455148 | 1998 | 1998 | Dear Jesse                                 | Dear Jesse                                 | Kirkman, Tim                 | Tim Kirkman         | tt0150290 |
| 1746394735 | 1989 | 1989 | On the Make                                | On the Make                                | Hurwitz, Samuel              | Sam Hurwitz         | tt0098024 |
| 1746422253 | 1994 | 1993 | The House of the Spirits                   | The House of the Spirits                   | August, Bille                | Bille August        | tt0107151 |
| 1746455665 | 1996 | 1995 | The Four Corners of Nowhere                | The Four Corners of Nowhere                | Chbosky, Steve               | Stephen Chbosky     | tt0113099 |
| 1745372512 | 2009 | 2009 | The Private Lives of Pippa Lee             | The Private Lives of Pippa Lee             | Miller, Rebecca              | Rebecca Miller      | tt1134629 |
| 1745373342 | 2008 | 2007 | What We Do Is Secret                       | What We Do Is Secret                       | Grossman, Rodger             | Rodger Grossman     | tt0384683 |
| 1746210520 | 1970 | 1970 | Chicago 70                                 | Chicago 70                                 | Feltham, Kerry               | Kerry Feltham       | tt0121143 |
| 1745373722 | 2010 | 2010 | Nanny McPhee Returns                       | Nanny McPhee Returns                       | White, Susanna               | Susanna White       | tt1415283 |
| 1745357738 | 2010 | 2010 | Queen of the Lot                           | Queen of the Lot                           | Jaglom, Henry                | Henry Jaglom        | tt1342122 |
| 1746394460 | 1984 | 1984 | The Little Drummer Girl                    | The Little Drummer Girl                    | Hill, George Roy             | George Roy Hill     | tt0087629 |
| 1746235534 | 1975 | 1975 | Mr. Ricco                                  | Mr. Ricco                                  | Bogart, Paul                 | Paul Bogart         | tt0073411 |
| 1746420993 | 1983 | 1983 | Angelo My Love                             | Angelo My Love                             | Duval, Robert                | Robert Duval        | tt0085168 |
| 1746235832 | 1973 | 1973 | Save the Children                          | Save the Children                          | Lathan, Stan                 | Stan Lathan         | tt0128454 |
| 1745282689 | 2005 | 2005 | Dandelion                                  | Dandelion                                  | Milgard, Mark                | Michael Ringston    | tt2050487 |
| 1746394176 | 1989 | 1988 | A Night in Havana: Dizzy Gillespie in Cuba | A Night in Havana: Dizzy Gillespie in Cuba | Holland, John                | John Holland        | tt0095735 |
| 1746456111 | 1995 | 1995 | Babe                                       | Babe                                       | Noonan, Chris                | Chris Noonan        | tt0112431 |
| 1746436226 | 1997 | 1997 | A Brother's Kiss                           | A Brother's Kiss                           | Rosenfeld, Seth Zvi          | Seth Zvi Rosenfeld  | tt0118783 |
| 1746409330 | 1985 | 1985 | Sylvester                                  | Sylvester                                  | Hunter, Tim                  | Tim Hunter          | tt0090112 |
| 1746256567 | 1978 | 1978 | Go Tell the Spartans                       | Go Tell the Spartans                       | Post, Ted                    | Ted Post            | tt0077617 |
| 1769973223 | 1970 | 1970 | The Lickerish Quartet                      | The Lickerish Quartet                      | Metzger, Radley              | Radley Metzger      | tt0065981 |
| 1769973189 | 1970 | 1970 | The Pleasure Game                          | The Pleasure Game                          | Vittoli, John                | John Vittoli        | tt0255484 |
| 1745341329 | 2011 | 2010 | Lemmy                                      | Lemmy                                      | Olliver, Greg; Orshoski, Wes | Greg Olliver        | tt1236472 |
| 1745309459 | 2005 | 2005 | Chaos                                      | Chaos                                      | DeFalco, David               | David DeFalco       | tt0405977 |
| 1745395083 | 2010 | 2010 | Tangled                                    | Tangled                                    | Greno, Nathan; Howard, Byron | Bronwen Hughes      | tt1706697 |
| 1746219042 | 1976 | 1976 | Baker's Hawk                               | Baker's Hawk                               | Dayton, Lyman D.             | Lyman Dayton        | tt0074176 |
| 1745302870 | 2006 | 2006 | Flicka                                     | Flicka                                     | Mayer, Michael               | Michael Mayer       | tt0434215 |
| 1769976687 | 1979 | 1979 | Sunburn                                    | Sunburn                                    | Sarafian, Richard C.         | Richard C. Sarafian | tt0079966 |
| 1746235655 | 1977 | 1976 | Panama Red                                 | Panama Red                                 | Chinn, Robert C.             | Bob Chinn           | tt0244120 |
| 1746211216 | 1974 | 1974 | Wonder of It All                           | Wonder of It All                           | Dubs, Arthur R.              | Arthur R. Dubs      | tt0185015 |
| 1745359988 | 2008 | 2008 | Shutter                                    | Shutter                                    | Ochiai, Masayuki             | Masayuki Ochiai     | tt0482599 |
| 1746235337 | 1972 | 1972 | The Wrath of God                           | The Wrath of God                           | Nelson, Ralph                | Ralph Nelson        | tt0069515 |
| 1745340253 | 2001 | 2001 | Skippy                                     | Skippy                                     | Zervos, Denis; Convery, Joe  | Dionysius Zervos    | tt0163246 |
| 1745322676 | 2006 | 2005 | Satellite                                  | Satellite                                  | Winner, Jeff                 | Andrew Zuchero      | tt2310093 |
| 1745341615 | 2003 | 2002 | Ocean Park                                 | Ocean Park                                 | Warfield, David              | David W. Warfield   | tt0207635 |
| 1745303198 | 2007 | 2007 | Canvas                                     | Canvas                                     | Greco, Joseph                | S.E. Blake          | tt1091988 |
| 1746235621 | 1975 | 1975 | Lucky Lady                                 | Lucky Lady                                 | Donen, Stanley               | Stanley Donen       | tt0073317 |
| 1745359881 | 2011 | 2010 | Cold Weather                               | Cold Weather                               | Katz, Aaron                  | Aaron Katz          | tt1497874 |
| 1745309260 | 2005 | 2005 | Thumbsucker                                | Thumbsucker                                | Mills, Mike                  | Mike Mills          | tt0318761 |
| 1746219639 | 1975 | 1975 | The Drowning Pool                          | The Drowning Pool                          | Rosenberg, Stuart            | Stuart Rosenberg    | tt0072912 |
| 1745309187 | 2005 | 2005 | The Girl from Monday                       | The Girl from Monday                       | Hartley, Hal                 | Hal Hartley         | tt0388973 |
| 1745373195 | 2004 | 2004 | Twisted                                    | Twisted                                    | Kaufman, Philip              | Jemiscoe Chambers   | tt0806199 |
| 1746209910 | 1970 | 1970 | C. C. and Company                          | C. C. & Company                            | Robbie, Seymour              | Seymour Robbie      | tt0065511 |
| 1746419603 | 1982 | 1982 | Time Walker                                | Time Walker                                | Kennedy, Tom                 | Tom Kennedy         | tt0084796 |
| 1746235716 | 1974 | 1974 | Harry and Tonto                            | Harry and Tonto                            | Mazursky, Paul               | Paul Mazursky       | tt0071598 |
| 1746218685 | 1970 | 1970 | Musical Mutiny                             | Musical Mutiny                             |                              | Barry Mahon         | tt0184759 |
| 1746419596 | 1986 | 1986 | Jocks                                      | Jocks                                      | Carver, Steve                | Steve Carver        | tt0093315 |
| 1745342524 | 2002 | 2002 | Evelyn                                     | Evelyn                                     | Beresford, Bruce             | Bruce Beresford     | tt0298856 |
| 1746410020 | 1991 | 1991 | Other People's Money                       | Other People's Money                       | Jewison, Norman              | Norman Jewison      | tt0102609 |
| 1746218816 | 1976 | 1976 | Death Play                                 | Death Play                                 | Storch, Arthur               | Arthur Storch       | tt0196488 |
| 1745375275 | 2010 | 2010 | Behind the Burly Q                         | Behind the Burly Q                         | Zemeckis, Leslie             | Leslie Zemeckis     | tt1510907 |
| 1745396067 | 2010 | 2010 | 11/4/08                                    | 11/4/08                                    | Deutchman, Jeff              | Jeff Deutchman      | tt1560609 |
| 1746409470 | 1980 | 1980 | On Company Business                        | On Company Business                        | Francovich, Allan            | Allan Francovich    | tt0093265 |

|            |      |      |                             |                             |                                   |                       |           |
|------------|------|------|-----------------------------|-----------------------------|-----------------------------------|-----------------------|-----------|
| 1746218896 | 1973 | 1972 | The Outside Man             | The Outside Man             | Deray, Jacques                    | Jacques Deray         | tt0070083 |
| 1746410134 | 1993 | 1993 | Cliffhanger                 | Cliffhanger                 | Harlin, Renny                     | Renny Harlin          | tt0106582 |
| 1746439211 | 1999 | 1999 | Limbo                       | Limbo                       | Sayles, John                      | John Sayles           | tt0164085 |
| 1769974255 | 1972 | 1973 | House of Terror             | House of Terror             | Goncharoff, Sergei                | Sergei Goncharoff     | tt0068721 |
| 1745374438 | 2001 | 2001 | Lipgloss Explosion!         | Lipgloss Explosion!         | Morrissey, Chris                  | Chris Morrissey       | tt0263657 |
| 1745373959 | 2001 | 2000 | Eban and Charley            | Eban and Charley            | Bolton, James                     | James Bolton          | tt0253063 |
| 1746422650 | 1999 | 1998 | Twice Upon a Yesterday      | Twice Upon a Yesterday      | Ripoll, Maria                     | Maria Ripoll          | tt0138590 |
| 1745303200 | 2007 | 2006 | Summertime!                 | Summertime!                 | Beesley, Bradley ; Price, Sarah   | Bradley Beesley       | tt0808487 |
| 1746218837 | 1977 | 1977 | Herbie Goes to Monte Carlo  | Herbie Goes to Monte Carlo  | McEveety, Vincent                 | Vincent McEveety      | tt0076137 |
| 1745271794 | 2000 | 2000 | Tea Cakes or Cannoli        | Tea Cakes or Cannoli        | Pellegrino, Francine              | Francine Pellegrino   | tt0207782 |
| 1746269710 | 1974 | 1973 | The Second Gun              | The Second Gun              | Alcan, Gérard                     | Gérard Alcan          | tt0163823 |
| 1746455545 | 1999 | 1998 | With or Without You         | With or Without You         | Andersson, Wendell Jon            | Wendell Jon Andersson | tt0120525 |
| 1745359468 | 2011 | 2010 | Vidal Sassoon: The Movie    | Vidal Sassoon: The Movie    | Teper, Craig                      | Craig Teper           | tt1649433 |
| 1745341792 | 2010 | 2010 | Audrey the Trainwreck       | Audrey the Trainwreck       | Ross, Frank V.                    | Frank V. Ross         | tt1314161 |
| 1745342459 | 2011 | 2010 | The Putt Putt Syndrome      | The Putt Putt Syndrome      | Cognata, Allen                    | Allen Cognata         | tt1460661 |
| 1746251503 | 1978 | 1978 | Beyond and Back             | Beyond and Back             | Conway, James L.                  | James L. Conway       | tt0077229 |
| 1745359046 | 2010 | 2009 | Convention                  | Convention                  | Schnack, AJ                       | AJ Schnack            | tt1292645 |
| 1746211063 | 1972 | 1972 | The Valachi Papers          | The Valachi Papers          | Young, Terence                    | Terence Young         | tt0068341 |
| 1746219349 | 1976 | 1976 | W. C. Fields and Me         | W. C. Fields and Me         | Hiller, Arthur                    | Arthur Hiller         | tt0075409 |
| 1745375002 | 2011 | 2010 | Everything Must Go          | Everything Must Go          | Rush, Dan                         | Dan Rush              | tt1531663 |
| 1745396478 | 2010 | 2010 | The Last Play at Shea       | The Last Play at Shea       | Crowder, Paul                     | Paul Crowder          | tt1262986 |
| 1746394467 | 1991 | 1991 | Dying Young                 | Dying Young                 | Schumacher, Joel                  | Joel Schumacher       | tt0101787 |
| 1746218857 | 1977 | 1977 | The Van                     | The Van                     | Grossman, Sam                     | Sam Grossman          | tt0075378 |
| 1745342774 | 2004 | 2004 | Envy                        | Envy                        | Levinson, Barry                   | Barry Levinson        | tt0326856 |
| 1745341018 | 2004 | 2004 | A Letter to True            | A Letter to True            | Weber, Bruce                      | Bruce Weber           | tt0401581 |
| 1746423315 | 1991 | 1991 | Iron Maze                   | Iron Maze                   | Yoshida, Hiroaki                  | Hiroaki Yoshida       | tt0102128 |
| 1745374598 | 2010 | 2010 | Douchebag                   | Douchebag                   | Doremus, Drake                    | Drake Doremus         | tt1535568 |
| 1746433745 | 1997 | 1997 | Double Team                 | Double Team                 | Hark, Tsui                        | Hark Tsui             | tt0119013 |
| 1746419202 | 1987 | 1987 | The Wild Pair               | The Wild Pair               | Bridges, Beau                     | Beau Bridges          | tt0094323 |
| 1746409501 | 1985 | 1985 | Crossover Dreams            | Crossover Dreams            | Ichaso, Leon                      | Leon Ichaso           | tt0088968 |
| 1746272042 | 1978 | 1978 | Seniors                     | The Seniors                 | Amateau, Rod                      | Rod Amateau           | tt0078228 |
| 1745303090 | 2007 | 2006 | Civic Duty                  | Civic Duty                  | Renfroe, Jeff                     | Jeff Renfroe          | tt0446298 |
| 1746219597 | 1973 | 1973 | The Vault of Horror         | The Vault of Horror         | Baker, Roy Ward                   | Roy Ward Baker        | tt0070868 |
| 1746235241 | 1976 | 1976 | From Noon Till Three        | From Noon Till Three        | Gilroy, Frank D.                  | Frank D. Gilroy       | tt0074553 |
| 1746420228 | 1986 | 1986 | Down and Out in America     | Down and Out in America     | Grant, Lee                        | Lee Grant             | tt0090965 |
| 1746419597 | 1988 | 1988 | The Invisible Kid           | The Invisible Kid           | Crouse, Avery                     | Avery Crouse          | tt0095381 |
| 1746269745 | 1977 | 1976 | The Swiss Conspiracy        | The Swiss Conspiracy        | Arnold, Jack                      | Jack Arnold           | tt0073774 |
| 1746392925 | 1981 | 1981 | Nobody's Perfekt            | Nobody's Perfekt            | Bonerz, Peter                     | Peter Bonerz          | tt0082822 |
| 1746203053 | 1970 | 1970 | Brother, Cry for Me         | Brother, Cry for Me         | White, William                    | William White         | tt0212004 |
| 1745302888 | 2005 | 2005 | Face                        | Fate                        | Pan, Bertha Bay-Sa                | Olumide Odeunmi       | tt0484351 |
| 1746235592 | 1974 | 1975 | The Brass Ring              | The Brass Ring              | Beck, Martin                      | Martin Beck           | tt0310795 |
| 1745293841 | 2007 | 2007 | Lake Dead                   | Lake Dead                   | Bessudo, George                   | George Bessudo        | tt0839880 |
| 1746219655 | 1980 | 1980 | Night of the Juggler        | Night of the Juggler        | Butler, Robert                    | Robert Butler         | tt0081230 |
| 1745340056 | 2002 | 2002 | Only the Strong Survive     | Only the Strong Survive     | Pennebaker, D. A.; Hegedus, Chris | Chris Hegedus         | tt0308672 |
| 1746248781 | 1977 | 1977 | Another Man, Another Chance | Another Man, Another Chance | Lelouch, Claude                   | Claude Lelouch        | tt0076847 |
| 1745359754 | 2008 | 2008 | While She Was Out           | While She Was Out           | Montford, Susan                   | Susan Montford        | tt0887971 |
| 1745272767 | 2000 | 1999 | Raging Hormones             | Raging Hormones             | Dugan, Michael                    | Michael Dugan         | tt0246880 |
| 1745375197 | 2009 | 2009 | Saw VI                      | Saw VI                      | Greutert, Kevin                   | Kevin Greutert        | tt1233227 |
| 1746436883 | 1999 | 1999 | Random Hearts               | Random Hearts               | Pollack, Sydney                   | Sydney Pollack        | tt0156934 |
| 1745340527 | 2003 | 2003 | 7 Year ZigZag               | 7 Year ZigZag               | Green, Richard                    | Richard Green         | tt0312315 |
| 1745282605 | 2007 | 2007 | Unearthed                   | Unearthed                   | Leutwyler, Matthew                | Matthew Leutwyler     | tt0475417 |
| 1746455973 | 1997 | 1997 | Sunday                      | Sunday                      | Nossiter, Jonathan                | Jonathan Nossiter     | tt0120244 |
| 1746408464 | 1989 | 1989 | Ginger Ale Afternoon        | Ginger Ale Afternoon        | Zielinski, Rafal                  | Rafal Zielinski       | tt0097432 |
| 1746393672 | 1983 | 1983 | Uncommon Valor              | Uncommon Valor              | Kotcheff, Ted                     | Rod Amateau           | tt0086509 |
| 1746393312 | 1988 | 1988 | The Beat                    | The Beat                    | Reynolds, Kevin                   | Paul Mones            | tt0094717 |
| 1746410430 | 1987 | 1987 | Hostage                     | Hostage                     | Mohr, Hanro; Rubens, Percival     | Hanro Möhr            | tt0093213 |
| 1745374942 | 2009 | 2009 | The Yes Men Fix the World   | The Yes Men Fix the World   | Bichlbaum, Andy; Bonanno, Mike    | Andy Bichlbaum        | tt1352852 |

|                   |             |             |                                        |                                         |                             |                          |                  |
|-------------------|-------------|-------------|----------------------------------------|-----------------------------------------|-----------------------------|--------------------------|------------------|
| 1746419586        | 1982        | 1982        | A Little Sex                           | A Little Sex                            | Paltrow, Bruce              | Bruce Paltrow            | tt0084259        |
| 1745332200        | 2011        | 2010        | The Road to Freedom                    | The Road to Freedom                     | Moriarty, Brendan           | Ignatius Fischer         | tt2379408        |
| 1746453968        | 1998        | 1998        | Madeline                               | Madeline                                | Mayer, Daisy von Scherler   | Daisy von Scherler Mayer | tt0123987        |
| 1746422965        | 1990        | 1990        | Daddy's Dyin'... Who's Got the Will?   | Daddy's Dyin'... Who's Got the Will?    | Fisk, Jack                  | Jack Fisk                | tt0099342        |
| 1745293359        | 2006        | 2006        | The Illusionist                        | The Illusionist                         | Burger, Neil                | Neil Burger              | tt0443543        |
| 1745272579        | 2000        | 2000        | A Piece of Eden                        | A Piece of Eden                         | Hancock, John               | John D. Hancock          | tt0181945        |
| 1746434915        | 1997        | 1997        | A Thousand Acres                       | A Thousand Acres                        | Moorhouse, Jocelyn          | Jocelyn Moorhouse        | tt0120323        |
| 1745340988        | 2009        | 2009        | Harmony and Me                         | Harmony and Me                          | Byington, Bob               | Bob Byington             | tt1196165        |
| 1746419568        | 1988        | 1988        | Coverup: Behind the Iran Contra Affair | Cover Up: Behind the Iran Contra Affair | Trent, Barbara              | David Kasper             | tt0094913        |
| 1745309564        | 2005        | 2004        | Paternal Instinct                      | Paternal Instinct                       | Nossel, Murray              | Murray Nossel            | tt0401713        |
| 1746248833        | 1977        | 1977        | Cheering Section                       | Cheering Section                        | Kerwin, Harry E.            | Harry Kerwin             | tt0075832        |
| 1746410140        | 1987        | 1987        | Steele Justice                         | Steele Justice                          | Boris, Robert               | Robert Boris             | tt0094034        |
| 1746420984        | 1994        | 1993        | Sugar Hill                             | Sugar Hill                              | Ichaso, Leon                | Leon Ichaso              | tt0107079        |
| 1745342772        | 2010        | 2009        | Leaves of Grass                        | Leaves of Grass                         | Nelson, Tim Blake           | Tim Blake Nelson         | tt1151359        |
| 1745373990        | 2011        | 2010        | Golf in the Kingdom                    | Golf in the Kingdom                     | Streitfeld, Susan           | Susan Streitfeld         | tt1448497        |
| 1746393410        | 1981        | 1981        | The Last Chase                         | The Last Chase                          | Burke, Martyn               | Martyn Burke             | tt0082642        |
| 1745302507        | 2007        | 2007        | In the Shadow of the Moon              | In the Shadow of the Moon               | Sington, David              | David Sington            | tt0925248        |
| 1746439770        | 1998        | 1998        | Claire Dolan                           | Claire Dolan                            | Kerrigan, Lodge             | Lodge Kerrigan           | tt0150143        |
| 1746218804        | 1975        | 1975        | Rafferty and the Gold Dust Twins       | Rafferty and the Gold Dust Twins        | Richards, Dick              | Dick Richards            | tt0073601        |
| 1746210158        | 1970        | 1970        | Dirtymouth                             | Dirtymouth                              | Altman, Herbert S.          | Herbert S. Altman        | tt0193104        |
| 1746408843        | 1992        | 1991        | Johnny Suede                           | Johnny Suede                            | DiCillo, Tom                | Tom DiCillo              | tt0104567        |
| 1745315776        | 2011        | 2010        | W.E.                                   | M.E.                                    | Madonna                     | John Van Slyke           | tt3563928        |
| 1746409027        | 1985        | 1985        | Louie Bluie                            | Louie Bluie                             | Zwigoff, Terry              | Terry Zwigoff            | tt0089507        |
| 1746422295        | 1993        | 1993        | Untamed Heart                          | Untamed Heart                           | Bill, Tony                  | Tony Bill                | tt0108451        |
| 1746393974        | 1986        | 1985        | Buddies                                | Buddies                                 | Bressan, Jr., Arthur J.     | Arthur J. Bressan Jr.    | tt0088864        |
| 1745340258        | 2003        | 2003        | The Good Thief                         | The Good Thief                          | Jordan, Neil                | R.T. Herwig              | tt0295284        |
| 1745374307        | 2003        | 2003        | Luther                                 | Luther                                  | Till, Eric                  | Eric Till                | tt0309820        |
| 1746218825        | 1972        | 1972        | Pilgrimage                             | Pilgrimage                              | Montresor, Beni             | Beni Montresor           | tt0254693        |
| 1746434331        | 1991        | 1991        | December                               | December                                | Torres, Gabe                | Gabe Torres              | tt0101695        |
| 1746437619        | 1997        | 1996        | Love Always                            | Love Always                             | Eberhard, Jude Pauline      | Jude Pauline Eberhard    | tt0119570        |
| 1746410137        | 1992        | 1992        | White Sands                            | White Sands                             | Donaldson, Roger            | Roger Donaldson          | tt0105813        |
| 1745282869        | 2007        | 2007        | Rails & Ties                           | Rails & Ties                            | Eastwood, Alison            | Alison Eastwood          | tt0822849        |
| 1745341299        | 2002        | 2002        | King Rikki                             | King Rikki                              | Bedford, James Gavin        | James Gavin Bedford      | tt0246890        |
| 1745342522        | 2003        | 2003        | Exorcism                               | Exorcism                                | Baker, William A.           | William A. Baker         | tt0340103        |
| 1746219614        | 1978        | 1978        | Return from Witch Mountain             | Return from Witch Mountain              | Hough, John                 | John Hough               | tt0078158        |
| 1746434862        | 1996        | 1996        | The Pallbearer                         | The Pallbearer                          | Reeves, Matt                | Matt Reeves              | tt0117283        |
| 1746218883        | 1971        | 1971        | The Jesus Trip                         | The Jesus Trip                          | Mayberry, Russ              | Russ Mayberry            | tt0067268        |
| 1746435884        | 1991        | 1991        | White Fang                             | White Fang                              | Kleiser, Randal             | Randal Kleiser           | tt0103247        |
| 1746454324        | 1995        | 1995        | Miami Rhapsody                         | Miami Rhapsody                          | Frankel, David              | David Frankel            | tt0113808        |
| 1746410694        | 1986        | 1986        | Lies                                   | Mies                                    | Wheat, Ken; Wheat, Jim      | Michael Blackwood        | tt1827475        |
| 1769976689        | 1976        | 1976        | The Last Affair                        | The Last Affair                         | Charbakshi, Henri           | Henri Charr              | tt0235535        |
| 1745282628        | 2006        | 2005        | Red Doors                              | Red Doors                               | Lee, Georgia                | Georgia Lee              | tt0415234        |
| 1746273063        | 1979        | 1979        | Americathon                            | Americathon                             | Israel, Neil                | Neal Israel              | tt0078766        |
| 1746408477        | 1986        | 1986        | Choke Canyon                           | Choke Canyon                            | Bail, Chuck                 | Charles Bail             | tt0090836        |
| 1745341987        | 2002        | 2002        | Farewell to My Country                 | Farewell to My Country                  | Krakowski, Andrzej          | Andrzej Krakowski        | tt0315582        |
| 1746410004        | 1985        | 1985        | Rainy Day Friends                      | Rainy Day Friends                       | Kent, Gary                  | Gary Kent                | tt0089451        |
| <b>1746210451</b> | <b>1970</b> | <b>1970</b> | <b>My Lover, My Son</b>                | <b>My Lover, My Son</b>                 | <b>Newland, John</b>        | <b>John Newland</b>      | <b>tt0066113</b> |
| 1746423573        | 1990        | 1990        | Hardware                               | Hardware                                | Stanley, Richard            | Richard Stanley          | tt0099740        |
| 1746433730        | 1999        | 1999        | The General's Daughter                 | The General's Daughter                  | West, Simon                 | Simon West               | tt0144214        |
| 1745342508        | 2010        | 2009        | Baghdad, Texas                         | Baghdad Texas                           | Hickey, David H.            | David Hickey             | tt0762072        |
| 1745272249        | 2000        | 1999        | 30 Days                                | 30 Days                                 | Harnick, Aaron              | Aaron Harnick            | tt0175414        |
| 1745342825        | 2002        | 2002        | Below                                  | Below                                   | Twohy, David                | David Twohy              | tt0276816        |
| 1746271322        | 1979        | 1979        | Incoming Freshmen                      | Incoming Freshmen                       | Lewald, Eric; Morgan, Glenn | Eric Lewald              | tt0079338        |
| 1746433762        | 1997        | 1997        | The Hotel Manor Inn                    | The Hotel Manor Inn                     | Chesler, Wayne              | Wayne Chesler            | tt0119321        |
| 1745359655        | 2002        | 2001        | Bartleby                               | Bartleby                                | Parker, Jonathan            | Jonathan Parker          | tt0230025        |
| 1745358691        | 2003        | 2003        | Love Don't Cost a Thing                | Love Don't Cost a Thing                 | Beyer, Troy                 | Troy Byer                | tt0337592        |
| 1745282604        | 2005        | 2005        | Checking Out                           | Checking Out                            | Hare, Jeff                  | Jeff Hare                | tt0417532        |

|                   |             |             |                                                |                                            |                                      |                      |                  |
|-------------------|-------------|-------------|------------------------------------------------|--------------------------------------------|--------------------------------------|----------------------|------------------|
| 1746420878        | 1997        | 1996        | Shiloh                                         | Shiloh                                     | Rosenbloom, Dale                     | Dale Rosenbloom      | tt0120118        |
| 1745358977        | 2009        | 2009        | Love N' Dancing                                | Love N' Dancing                            | Iscove, Robert                       | Robert Iscove        | tt1028581        |
| 1746218683        | 1972        | 1971        | Love Minus One                                 | Love Minus One                             | Gyorffy, Gabriel                     | Gabriel E. Gyorffy   | tt0460495        |
| 1746439999        | 1999        | 1999        | Journey to a Hate Free Millennium              | Journey to a Hate Free Millennium          | Scarpo, Brent ; Bedogne, Martin      | Martin Bedogne       | tt0226877        |
| 1745282757        | 2005        | 2004        | I Like Killing Flies                           | I Like Killing Flies                       | Mahurin, Matt                        | Matt Mahurin         | tt0390109        |
| 1746219405        | 1974        | 1974        | Watched!                                       | Watched!                                   | Parsons, John                        | John Parsons         | tt0069487        |
| 1746409434        | 1987        | 1987        | Surrender                                      | Surrender                                  | Belson, Jerry                        | Jerry Belson         | tt0094078        |
| 1746423749        | 1996        | 1995        | I Shot a Man in Vegas                          | I Shot a Man in Vegas                      | Waxman, Keoni                        | Keoni Waxman         | tt0113369        |
| 1746218778        | 1973        | 1973        | Badge 373                                      | Badge 373                                  | Koch, Howard W.                      | Howard W. Koch       | tt0069761        |
| 1745340008        | 2004        | 2004        | Home of the Brave                              | Home of the Brave                          | di Florio, Paola                     | Paola di Florio      | tt0389009        |
| 1746272985        | 1980        | 1980        | Herbie Goes Bananas                            | Herbie Goes Bananas                        | McEveety, Vincent                    | Vincent McEveety     | tt0080861        |
| 1746257489        | 1977        | 1977        | The Greatest                                   | The Greatest                               | Gries, Tom                           | Tom Gries            | tt0076111        |
| 1745395365        | 2010        | 2010        | You Will Meet a Tall Dark Stranger             | You Will Meet a Tall Dark Stranger         | Allen, Woody                         | Woody Allen          | tt1182350        |
| 1746455159        | 1998        | 1998        | Waking Ned Devine                              | Waking Ned Devine                          | Jones, Kirk                          | Kirk Jones           | tt0166396        |
| 1745374128        | 2010        | 2010        | I Spit on Your Grave                           | I Spit on Your Grave                       | Monroe, Steven R.                    | Steven R. Monroe     | tt1242432        |
| 1769974226        | 1970        | 1970        | Daddy, Darling                                 | Daddy, Darling                             | Sarno, Joseph W.                     | Joseph W. Sarno      | tt0062847        |
| 1746409256        | 1981        | 1981        | First Monday in October                        | First Monday in October                    | Neame, Ronald                        | Ronald Neame         | tt0082382        |
| 1745374957        | 2010        | 2009        | Soundtrack for a Revolution                    | Soundtrack for a Revolution                | Guttentag, William; Sturman, Dan     | Bill Guttentag       | tt1358885        |
| 1746423033        | 1989        | 1989        | Rooftops                                       | Rooftops                                   | Wise, Robert                         | Robert Wise          | tt0098222        |
| 1745395408        | 2009        | 2008        | The Narrows                                    | The Narrows                                | Velle, François                      | François Velle       | tt1008010        |
| 1745359840        | 2003        | 2002        | Reverend Billy and the Church of Stop Shopping | Reverend Billy and the Church of Stop Shop | Post, Dietmar                        | Dietmar Post         | tt0790740        |
| 1746393382        | 1986        | 1986        | The Check Is in the Mail                       | The Check Is in the Mail...                | Darling, Joan                        | Joan Darling         | tt0090818        |
| 1746409923        | 1985        | 1985        | Rustlers' Rhapsody                             | Rustlers' Rhapsody                         | Wilson, Hugh                         | Hugh Wilson          | tt0089945        |
| 1746392624        | 1983        | 1983        | The Last Fight                                 | The Last Fight                             | Williamson, Fred                     | Fred Williamson      | tt0084236        |
| 1746394168        | 1989        | 1989        | Let It Ride                                    | Let It Ride                                | Pytka, Joe                           | Joe Pytka            | tt0097731        |
| 1746440309        | 1999        | 1999        | Simply Irresistible                            | Simply Irresistible                        | Tarlov, Mark                         | Mark Tarlov          | tt0145893        |
| 1746410381        | 1981        | 1981        | Taps                                           | Taps                                       | Becker, Harold                       | Harold Becker        | tt0083169        |
| 1746453696        | 1999        | 1998        | Mob Queen                                      | Mob Queen                                  | Carnoy, Jon                          | Jon Carnoy           | tt0154887        |
| 1746235022        | 1973        | 1972        | Raw Meat                                       | Raw Meat                                   | Sherman, Gary                        | Gary Sherman         | tt0068458        |
| 1746455670        | 1997        | 1997        | Poverty Outlaw                                 | Poverty Outlaw                             | Yates, Pamela; Kinoy, Peter          | Peter Kinoy          | tt0127147        |
| 1746410718        | 1986        | 1986        | The Longshot                                   | The Longshot                               | Bartel, Paul                         | Paul Bartel          | tt0091430        |
| 1746211110        | 1970        | 1970        | Carry It On                                    | Carry It On                                | Coyne, James; Jones, Robert C.; Knig | James Coyne          | tt0188484        |
| 1745282803        | 2007        | 2007        | Pete Seeger: The Power of Song                 | Pete Seeger: The Power of Song             | Brown, Jim                           | Jim Brown            | tt1003116        |
| 1746256588        | 1974        | 1974        | Gone With the West                             | Gone with the West                         | Girard, Bernard                      | Bernard Girard       | tt0073059        |
| <b>1746435011</b> | <b>1997</b> | <b>1997</b> | <b>Zeus and Roxanne</b>                        | <b>Zeus and Roxanne</b>                    | <b>Miller, George</b>                | <b>George Miller</b> | <b>tt0120550</b> |
| 1746455138        | 2000        | 2000        | Crime + Punishment in Suburbia                 | Crime + Punishment in Suburbia             | Schmidt, Rob                         | Rob Schmidt          | tt0197384        |
| 1746394503        | 1992        | 1992        | Into the Sun                                   | Into the Sun                               | Kiersch, Fritz                       | Fritz Kiersch        | tt0104521        |
| 1746419379        | 1994        | 1994        | Lightning Jack                                 | Lightning Jack                             | Wincer, Simon                        | Simon Wincer         | tt0110353        |
| 1746209948        | 1970        | 1970        | Judy                                           | Judy                                       | Hanson, David W.                     | David W. Hanson      | tt0222078        |
| 1746408627        | 1985        | 1985        | Sudden Death                                   | Sudden Death                               | Shore, Sig                           | Sig Shore            | tt0090096        |
| 1745374947        | 2010        | 2010        | Lottery Ticket                                 | Lottery Ticket                             | White, Erik                          | Samuel Tomfohr       | tt1453404        |
| 1746410392        | 1992        | 1992        | Storyville                                     | Storyville                                 | Frost, Mark                          | Mark Frost           | tt0105480        |
| 1745341754        | 2002        | 2002        | Leela                                          | Leela                                      | Sen, Somnath                         | Somnath Sen          | tt0300115        |
| 1745359045        | 2010        | 2010        | Frozen                                         | Frozen                                     | Green, Adam                          | Alain Alfaro         | tt1638978        |
| 1746434295        | 1998        | 1998        | Bride of Chucky                                | Bride of Chucky                            | Yu, Ronny                            | Ronny Yu             | tt0144120        |
| 1745340313        | 2002        | 2002        | Nicholas Nickleby                              | Nicholas Nickleby                          | McGrath, Douglas                     | Douglas McGrath      | tt0309912        |
| 1746235882        | 1978        | 1978        | Convoy                                         | Convoy                                     | Peckinpah, Sam                       | Sam Peckinpah        | tt0077369        |
| 1746410536        | 1990        | 1990        | Little Vegas                                   | Little Vegas                               | Lang, Perry                          | Perry Lang           | tt0100036        |
| 1745357622        | 2010        | 2010        | Buried                                         | Buried                                     | Cortés, Rodrigo                      | Rodrigo Cortés       | tt1462758        |
| 1746409299        | 1987        | 1986        | Crystal Heart                                  | Crystal Heart                              | Bettman, Gil                         | Gil Bettman          | tt0088952        |
| 1745303002        | 2006        | 2006        | Snow Blind                                     | Snow Blind                                 | Scott, Christopher J.                | Christopher J. Scott | tt0783585        |
| 1746394447        | 1983        | 1982        | One Down, Two to Go                            | One Down, Two to go                        | Williamson, Fred                     | Fred Williamson      | tt0086051        |
| 1745341594        | 2002        | 2001        | The Mad Songs of Fernanda Hussein              | The Mad Songs of Fernanda Hussein          | Gianvito, John                       | John Gianvito        | tt0296067        |
| 1746210561        | 1972        | 1972        | Blue Money                                     | Blue Money                                 | Chappuis, Alain-Patrick              | Alain Patrick        | tt0211957        |
| 1745302750        | 2007        | 2007        | In the Valley of Elah                          | In the Valley of Elah                      | Haggis, Paul                         | Paul Haggis          | tt0478134        |
| 1746258163        | 1979        | 1979        | Players                                        | Players                                    | Harvey, Anthony                      | Anthony Harvey       | tt0079723        |
| 1745342839        | 2011        | 2010        | Bill Cunningham New York                       | Bill Cunningham New York                   | Press, Richard                       | Richard Press        | tt1621444        |

|            |      |      |                                                |                                             |                                |                      |           |
|------------|------|------|------------------------------------------------|---------------------------------------------|--------------------------------|----------------------|-----------|
| 1746269730 | 1978 | 1978 | Who Is Killing the Great Chefs of Europe?      | Who Is Killing the Great Chefs of Europe?   | Kotcheff, Ted                  | Ted Kotcheff         | tt0078488 |
| 1746439742 | 2000 | 2000 | Lost Souls                                     | Lost Souls                                  | Kaminski, Janusz               | Janusz Kaminski      | tt0160484 |
| 1746435297 | 1995 | 1995 | White Man's Burden                             | White Man's Burden                          | Nakano, Desmond                | Desmond Nakano       | tt0114928 |
| 1746433556 | 1990 | 1990 | A Show of Force                                | A Show of Force                             | Barreto, Bruno                 | Bruno Barreto        | tt0100606 |
| 1745359705 | 2002 | 2002 | Presumed Guilty: Tales of the Public Defenders | Presumed Guilty: Tales of the Public Defend | Yates, Pamela                  | Pamela Yates         | tt0316436 |
| 1745374981 | 2008 | 2007 | Save Me                                        | Save Me                                     | Cary, Robert                   | Mian Adnan Ahmad     | tt1357504 |
| 1746439419 | 1999 | 1999 | Flushed                                        | Flushed                                     | Ansell, Carrie                 | Carrie Ansell        | tt0205940 |
| 1745358567 | 2008 | 2007 | The Memory Thief                               | The Memory Thief                            | Kofman, Gil                    | Gil Kofman           | tt0437250 |
| 1746218679 | 1970 | 1970 | Barbie's Hospital Affair                       | Barbie's Hospital Affair                    | Roberts, Arnold                | Arnold Roberts       | tt0211217 |
| 1745359404 | 2004 | 2004 | Resident Evil: Apocalypse                      | Resident Evil: Apocalypse                   | Witt, Alexander                | Alexander Witt       | tt0318627 |
| 1746409816 | 1990 | 1989 | The Big Dis                                    | The Big Dis                                 | Eriksen, Gordon; O'Brien, John | Gordon Eriksen       | tt0099135 |
| 1745293898 | 2007 | 2007 | Crazy Love                                     | Crazy Love                                  | Klores, Dan                    | William Van Cuyck    | tt1002971 |
| 1745360037 | 2004 | 2003 | Testosterone                                   | Testosterone                                | Moreton, David                 | David Moreton        | tt0378867 |
| 1746249999 | 1977 | 1977 | Stunts                                         | Stunts                                      | Lester, Mark L.                | Mark L. Lester       | tt0076776 |
| 1769977751 | 1980 | 1979 | Caligula                                       | Caligula                                    | Brass, Tinto                   | Tinto Brass          | tt0080491 |
| 1745372378 | 2008 | 2008 | Fuel                                           | Fuel                                        | Tickell, Josh                  | Michael P. Nash      | tt0992915 |
| 1746250778 | 1980 | 1979 | The Visitor                                    | The Visitor                                 | Paradise, Michael J.           | Giulio Paradisi      | tt0080100 |
| 1745339966 | 2001 | 2001 | Scout's Honor                                  | Scout's Honor                               | Shepard, Tom                   | Tom Shepard          | tt0278018 |
| 1745358654 | 2009 | 2008 | Jazz in the Diamond District                   | Jazz in the Diamond District                | Christian, Lindsey             | Lindsey Christian    | tt0861779 |
| 1746455517 | 1995 | 1995 | Richard III                                    | Richard III                                 | Loncraine, Richard             | Richard Loncraine    | tt0114279 |
| 1746408701 | 1986 | 1985 | Head Office                                    | Head Office                                 | Finkleman, Ken                 | Ken Finkleman        | tt0091183 |
| 1745341771 | 2010 | 2010 | Dear John                                      | Dear John                                   | Hallström, Lasse               | Lasse Hallström      | tt0989757 |
| 1745340084 | 2004 | 2003 | Bukowski: Born into This                       | Bukowski: Born into This                    | Dullaghan, John                | John Dullaghan       | tt0342150 |
| 1746408695 | 1982 | 1982 | TAG: The Assassination Game                    | Tag: The Assassination Game                 | Castle, Nick                   | Nick Castle          | tt0084756 |
| 1746434635 | 1999 | 1998 | East of Hope Street                            | East of Hope Street                         | Thomas, Nate                   | Nate Thomas          | tt0157566 |
| 1746269660 | 1975 | 1975 | The Black Bird                                 | The Black Bird                              | Giler, David                   | David Giler          | tt0072706 |
| 1746408489 | 1991 | 1991 | The Super                                      | The Super                                   | Daniel, Rod                    | Rod Daniel           | tt0103007 |
| 1746422629 | 1993 | 1993 | Body of Evidence                               | Body of Evidence                            | Edel, Uli                      | Uli Edel             | tt0106453 |
| 1745293450 | 2007 | 2007 | War/Dance                                      | War Dance                                   | Fine, Sean ; Fine, Andrea Nix  | Sean Fine            | tt0912599 |
| 1746423346 | 1993 | 1993 | Posse                                          | Posse                                       | Van Peebles, Mario             | Mario Van Peebles    | tt0107863 |
| 1746218668 | 1971 | 1971 | The Pursuit of Happiness                       | The Pursuit of Happiness                    | Mulligan, Robert               | Robert Mulligan      | tt0067634 |
| 1746440002 | 1996 | 1996 | Heaven's Prisoners                             | Heaven's Prisoners                          | Joanou, Phil                   | Phil Joanou          | tt0116508 |
| 1745339998 | 2001 | 2000 | Under Hellgate Bridge                          | Under Hellgate Bridge                       | Sergio, Michael                | Michael Sergio       | tt0202642 |
| 1745374570 | 2011 | 2010 | Beautiful Darling                              | Beautiful Darling                           | Rasin, James                   | James Rasin          | tt0960730 |
| 1746420525 | 1991 | 1990 | Horseplayer                                    | Horseplayer                                 | Voss, Kurt                     | Kurt Voss            | tt0099796 |
| 1746393120 | 1987 | 1987 | Heart                                          | Heart                                       | Lemmo, James                   | James Lemmo          | tt0093161 |
| 1746210690 | 1972 | 1972 | Snowball Express                               | Snowball Express                            | Tokar, Norman                  | Norman Tokar         | tt0069291 |
| 1746202839 | 1970 | 1970 | Mark of the Witch                              | Mark of the Witch                           | Moore, Tom                     | Tom Moore            | tt0066058 |
| 1745282706 | 2006 | 2006 | The Nativity Story                             | The Nativity Story                          | Hardwicke, Catherine           | Catherine Hardwicke  | tt0762121 |
| 1746455674 | 1996 | 1995 | Lover's Knot                                   | Lover's Knot                                | Shaner, Pete                   | Peter Shaner         | tt0116934 |
| 1746270144 | 1978 | 1978 | Coach                                          | Coach                                       | Townsend, Bud                  | Bud Townsend         | tt0077351 |
| 1745359216 | 2009 | 2008 | An Unlikely Weapon                             | An Unlikely Weapon                          | Cooper, Susan Morgan           | Susan Morgan Cooper  | tt1226261 |
| 1746419786 | 1983 | 1983 | Cross Creek                                    | Cross Creek                                 | Ritt, Martin                   | Martin Ritt          | tt0085380 |
| 1746454745 | 1996 | 1995 | Sleepover                                      | Sleepover                                   | Sullivan, John                 | John F. Sullivan     | tt0114472 |
| 1746454730 | 1997 | 1996 | Reggie's Prayer                                | Reggie's Prayer                             | McKellips, Paul                | Paul McKellips       | tt0117457 |
| 1746433916 | 1999 | 1999 | Shiloh 2: Shiloh Season                        | Shiloh 2: Shiloh Season                     | Tung, Sandy                    | Sandy Tung           | tt0175159 |
| 1745358548 | 2011 | 2010 | Meek's Cutoff                                  | Meek's Cutoff                               | Reichardt, Kelly               | Kelly Reichardt      | tt1518812 |
| 1745309442 | 2006 | 2006 | Los Lonely Boys: Cottonfields and Crossroads   | Los Lonely Boys: Cottonfields and Crossroad | Galán, Hector                  | Hector Galan         | tt0783545 |
| 1746410818 | 1993 | 1994 | Taxi Dancers                                   | Taxi Dancers                                | Vane, Norman Thaddeus          | Norman Thaddeus Vane | tt0108304 |
| 1746434661 | 1997 | 1997 | An American Werewolf in Paris                  | An American Werewolf in Paris               | Waller, Anthony                | Anthony Waller       | tt0118604 |
| 1745359036 | 2008 | 2008 | Wendy and Lucy                                 | Wendy and Lucy                              | Reichardt, Kelly               | Kelly Reichardt      | tt1152850 |
| 1746249034 | 1975 | 1975 | Cornbread, Earl and Me                         | Cornbread, Earl and Me                      | Manduke, Joe                   | Joseph Manduke       | tt0072822 |
| 1746256614 | 1978 | 1978 | If Ever I See You Again                        | If Ever I See You Again                     | Brooks, Joe                    | Joseph Brooks        | tt0077720 |
| 1746211504 | 1972 | 1972 | Please Stand By                                | Please Stand By                             | Milton, Jack; Milton, Joanna   | Jack Milton          | tt0259512 |
| 1746437594 | 1995 | 1995 | The Big Green                                  | The Big Green                               | Goldberg Sloan, Holly          | Holly Goldberg Sloan | tt0112499 |
| 1746409971 | 1985 | 1985 | Stitches                                       | Stitches                                    | Smithee, Alan                  | Rod Holcomb          | tt0090079 |
| 1746393208 | 1984 | 1984 | Fleshburn                                      | Fleshburn                                   | Gage, George                   | George Gage          | tt0087270 |

|            |      |      |                                       |                                       |                                   |                      |           |
|------------|------|------|---------------------------------------|---------------------------------------|-----------------------------------|----------------------|-----------|
| 1746421731 | 1999 | 1999 | Diamonds                              | Diamonds                              | Asher, John                       | John Asher           | tt0167423 |
| 1746235331 | 1976 | 1976 | Mustang Country                       | Mustang Country                       | Champion, John                    | John C. Champion     | tt0074940 |
| 1746408515 | 1987 | 1987 | The Princess Academy                  | The Princess Academy                  | Block, Bruce                      | Bruce A. Block       | tt0093778 |
| 1746419575 | 1987 | 1987 | Scared Stiff                          | Scared Stiff                          | Friedman, Richard                 | Richard Friedman     | tt0091898 |
| 1745372615 | 2001 | 2001 | Kaaterskill Falls                     | Kaaterskill Falls                     | Apter, Josh; Olsen, Peter         | Josh Apter           | tt0283429 |
| 1746219009 | 1975 | 1975 | The Manchu Eagle Murder Caper Mystery | The Manchu Eagle Murder Caper Mystery | Hargrove, Dean                    | Dean Hargrove        | tt0070366 |
| 1746409518 | 1986 | 1986 | Wildcats                              | Wildcats                              | Ritchie, Michael                  | Michael Ritchie      | tt0092214 |
| 1746219381 | 1972 | 1972 | The Salzburg Connection               | The Salzburg Connection               | Katzin, Lee H.                    | Lee H. Katzin        | tt0069212 |
| 1746437181 | 1997 | 1997 | Colors Straight Up                    | Colors Straight Up                    | Ohayon, Michele                   | Michèle Ohayon       | tt0126249 |
| 1746219235 | 1979 | 1979 | Ravagers                              | Ravagers                              | Compton, Richard                  | Richard Compton      | tt0079777 |
| 1746439096 | 1999 | 1998 | Old Man River                         | Old Man River                         | Holzman, Allan                    | Allan Holzman        | tt0220678 |
| 1746394179 | 1990 | 1990 | Courage Mountain                      | Courage Mountain                      | Leitch, Christopher               | Christopher Leitch   | tt0097115 |
| 1745342937 | 2009 | 2009 | Law Abiding Citizen                   | Law Abiding Citizen                   | Gray, F. Gary                     | F. Gary Gray         | tt1197624 |
| 1746251514 | 1976 | 1976 | Secrets of the Gods                   | Secrets of the Gods                   | Sachs, William                    | William Sachs        | tt0196080 |
| 1746455250 | 1998 | 1997 | Red Meat                              | Red Meat                              | Burnett, Allison                  | Allison Burnett      | tt0119997 |
| 1745293518 | 2006 | 2006 | The Last Kiss                         | The Last Kiss                         | Goldwyn, Tony                     | Tony Goldwyn         | tt0434139 |
| 1745332451 | 2011 | 2010 | Fanny, Annie & Danny                  | Fanny, Annie & Danny                  | Brown, Chris                      | Chris Brown          | tt1614338 |
| 1746219242 | 1975 | 1974 | Shoot It: Black Shoot It: Blue        | Shoot It Black, Shoot It Blue         | McGuire, Dennis                   | Dennis McGuire       | tt0072153 |
| 1745315772 | 2011 | 2010 | Father of Invention                   | Father of Invention                   | Cooper, Trent                     | Trent Cooper         | tt1381505 |
| 1745332460 | 2011 | 2010 | 5 Star Day                            | 5 Star Day                            | Buday, Danny                      | Danny Buday          | tt1325743 |
| 1745357607 | 2009 | 2009 | Tenderness                            | Tenderness                            | Polson, John                      | John Polson          | tt0494864 |
| 1746382249 | 1982 | 1982 | Death Valley                          | Death Valley                          | Richards, Dick                    | Dick Richards        | tt0083805 |
| 1746210131 | 1971 | 1971 | Brain of Blood                        | Brain of Blood                        | Adamson, Al                       | Al Adamson           | tt0068313 |
| 1746409127 | 1992 | 1992 | Steal America                         | Steal America                         | Phillips, Lucy                    | Lucy Phillips        | tt0102977 |
| 1746420531 | 1993 | 1993 | Watch It                              | Watch It                              | Flynn, Tom                        | Tom Flynn            | tt0108521 |
| 1746438025 | 1995 | 1995 | Last of the Dogmen                    | Last of the Dogmen                    | Murphy, Tab                       | Tab Murphy           | tt0113617 |
| 1746409122 | 1984 | 1984 | The Bear                              | The Bear                              | Sarafian, Richard C.              | Richard C. Sarafian  | tt0086945 |
| 1745359298 | 2008 | 2007 | Dark Matter                           | Dark Matter                           | Shi-Zheng, Chen                   | Shi                  | tt0416675 |
| 1745272128 | 2000 | 1999 | Off the Hook                          | Off the Hook                          | Watstein, Adam                    | Adam Watstein        | tt0218858 |
| 1745282899 | 2007 | 2007 | Hitman                                | Hitman                                | Gens, Xavier                      | Reed Randoy          | tt1423382 |
| 1746419595 | 1988 | 1988 | Cop                                   | Cop                                   | Harris, James B.                  | James B. Harris      | tt0092783 |
| 1745342029 | 2008 | 2008 | Man on Wire                           | Man on Wire                           | Marsh, James                      | James Marsh          | tt1155592 |
| 1745374170 | 2003 | 2003 | The Turn of the Screw                 | The Turn of the Screw                 | Millard, Nick                     | Nick Millard         | tt0373403 |
| 1745272524 | 2000 | 2000 | Under Suspicion                       | Under Suspicion                       | Hopkins, Stephen                  | Stephen Hopkins      | tt0164212 |
| 1746433697 | 1994 | 1994 | My Father, The Hero                   | My Father the Hero                    | Miner, Steve                      | Steve Miner          | tt0110612 |
| 1746421304 | 1992 | 1992 | A Stranger Among Us                   | A Stranger Among Us                   | Lumet, Sidney                     | Sidney Lumet         | tt0105483 |
| 1746210779 | 1973 | 1973 | Scream Blacula Scream                 | Scream Blacula Scream                 | Kelljan, Bob                      | Bob Kelljan          | tt0070656 |
| 1746219414 | 1976 | 1976 | Sky Riders                            | Sky Riders                            | Hickox, Douglas                   | Douglas Hickox       | tt0075229 |
| 1745339950 | 2002 | 2001 | Virgil Bliss                          | Virgil Bliss                          | Maggio, Joe                       | Joe Maggio           | tt0276607 |
| 1746410195 | 1989 | 1989 | Rude Awakening                        | Rude Awakening                        | Russo, Aaron; Greenwalt, David    | David Greenwalt      | tt0098230 |
| 1745375001 | 2009 | 2009 | Hannah Free                           | Hannah Free                           | Carlton, Wendy Jo                 | Wendy Jo Carlton     | tt1315214 |
| 1746419600 | 1991 | 1991 | Wild Hearts Can't Be Broken           | Wild Hearts Can't Be Broken           | Miner, Steve                      | Steve Miner          | tt0103262 |
| 1746257204 | 1978 | 1978 | Brass Target                          | Brass Target                          | Hough, John                       | John Hough           | tt0077272 |
| 1745341809 | 2008 | 2008 | Gardens of the Night                  | Gardens of the Night                  | Harris, Damian                    | Damian Harris        | tt0833960 |
| 1745372821 | 2010 | 2010 | 8: The Mormon Proposition             | 8: The Mormon Proposition             | Cowan, Reed                       | Reed Cowan           | tt1484522 |
| 1745374306 | 2002 | 2002 | Buddha Heads                          | Buddha Heads                          | Maeda, Brian T.                   | Brian T. Maeda       | tt0328913 |
| 1745309407 | 2004 | 2003 | Ghostlight                            | Ghostlight                            | Herrmann, Christopher; Move, Rich | Christopher Herrmann | tt0239004 |
| 1746210770 | 1971 | 1971 | The World Is Just a B Movie           | The World Is Just a 'B' Movie         | Robinson, R. D.; Stecker, Alan    | R.D. Robinson        | tt0232964 |
| 1746454467 | 1996 | 1996 | The Frighteners                       | The Frighteners                       | Jackson, Peter                    | Peter Jackson        | tt0116365 |
| 1746394220 | 1991 | 1991 | Convicts                              | Convicts                              | Masterson, Peter                  | Peter Masterson      | tt0099300 |
| 1746409469 | 1981 | 1981 | Getting Over                          | Getting Over                          | Rollins, Bernie                   | Bernie Rollins       | tt0080784 |
| 1746437559 | 1998 | 1998 | Your Friends & Neighbors              | Your Friends & Neighbors              | LaBute, Neil                      | Neil LaBute          | tt0119517 |
| 1746210784 | 1972 | 1973 | Jory                                  | Jory                                  | Fons, Jorge                       | Jorge Fons           | tt0068773 |
| 1746250838 | 1978 | 1977 | The Billion Dollar Hobo               | The Billion Dollar Hobo               | McGowan, Stuart E.                | Stuart E. McGowan    | tt0077238 |
| 1745340032 | 2004 | 2004 | Bobby Jones: Stroke of Genius         | Bobby Jones: Stroke of Genius         | Herrington, Rowdy                 | Rowdy Herrington     | tt0375104 |
| 1745293354 | 2006 | 2006 | Iraq for Sale: The War Profiteers     | Iraq for Sale: The War Profiteers     | Greenwald, Robert                 | Robert Greenwald     | tt0815181 |
| 1746422521 | 1997 | 1997 | FairyTale -- A True Story             | FairyTale: A True Story               | Sturridge, Charles                | Charles Sturridge    | tt0119095 |

|            |      |      |                                               |                                           |                                  |                    |           |
|------------|------|------|-----------------------------------------------|-------------------------------------------|----------------------------------|--------------------|-----------|
| 1745309241 | 2005 | 2005 | Me and You and Everyone We Know               | Me and You and Everyone We Know           | July, Miranda                    | Miranda July       | tt0415978 |
| 1746421342 | 1997 | 1996 | Inside                                        | Inside                                    | Penn, Arthur                     | Arthur Penn        | tt0116640 |
| 1746393323 | 1984 | 1984 | No Small Affair                               | No Small Affair                           | Schatzberg, Jerry                | Jerry Schatzberg   | tt0087810 |
| 1746211247 | 1972 | 1972 | The Man                                       | The Man                                   | Sargent, Joseph                  | Joseph Sargent     | tt0068912 |
| 1745342467 | 2009 | 2009 | The Road                                      | The Road                                  | Hillcoat, John                   | Aaron Kemp         | tt2987762 |
| 1745394362 | 2008 | 2008 | Rachel Getting Married                        | Rachel Getting Married                    | Demme, Jonathan                  | Jonathan Demme     | tt1084950 |
| 1746455142 | 2000 | 2000 | Animal Factory                                | Animal Factory                            | Buscemi, Steve                   | Steve Buscemi      | tt0204137 |
| 1746393118 | 1986 | 1985 | Stripper                                      | Stripper                                  | Gary, Jerome                     | Jerome Gary        | tt0090092 |
| 1746434858 | 1996 | 1996 | Infinity                                      | Infinity                                  | Broderick, Matthew               | Matthew Broderick  | tt0116635 |
| 1746235382 | 1971 | 1971 | Black Chariot                                 | Black Chariot                             | Goodwin, Robert L.               | Robert Goodwin     | tt0144109 |
| 1745342837 | 2002 | 2002 | Group                                         | Group                                     | Freeman, Marilyn                 | Anne de Marcken    | tt0332636 |
| 1746271031 | 1979 | 1979 | Prophecy                                      | Prophecy                                  | Frankenheimer, John              | John Frankenheimer | tt0079758 |
| 1745340295 | 2002 | 2002 | Undisputed                                    | Undisputed                                | Hill, Walter                     | Walter Hill        | tt0281322 |
| 1746422243 | 1993 | 1992 | Deception                                     | Deceptions                                | Clifford, Graeme                 | L.J. Munkler       | tt0193082 |
| 1746258720 | 1975 | 1975 | Peeper                                        | Peeper                                    | Hyams, Peter                     | Peter Hyams        | tt0073526 |
| 1746234735 | 1974 | 1974 | Chosen Survivors                              | Chosen Survivors                          | Roley, Sutton                    | Sutton Roley       | tt0071318 |
| 1746211458 | 1972 | 1972 | Irish Whiskey Rebellion                       | Irish Whiskey Rebellion                   | Erskine, Chester                 | Chester Erskine    | tt0179894 |
| 1746257165 | 1980 | 1980 | Below the Belt                                | Below the Belt                            | Fowler, Robert                   | Robert Fowler      | tt0080427 |
| 1745359824 | 2010 | 2009 | Falling Awake                                 | Falling Awake                             | Agustin                          | Agustin            | tt1043756 |
| 1746410154 | 1991 | 1991 | Talkin' Dirty After Dark                      | Talkin' Dirty After Dark                  | Carew, Topper                    | Topper Carew       | tt0103039 |
| 1745342260 | 2004 | 2003 | Rectuma                                       | Rectuma                                   | Pirro, Mark                      | Mark Pirro         | tt0365674 |
| 1746419147 | 1988 | 1988 | Judgment in Berlin                            | Judgment in Berlin                        | Penn, Leo                        | Leo Penn           | tt0095415 |
| 1746219619 | 1976 | 1976 | Not a Pretty Picture                          | Not a Pretty Picture                      | Coolidge, Martha                 | Martha Coolidge    | tt0073467 |
| 1746408835 | 1992 | 1992 | Whispers in the Dark                          | Whispers in the Dark                      | Crowe, Christopher               | Christopher Crowe  | tt0105811 |
| 1745302284 | 2006 | 2006 | Invisible                                     | Invisible                                 | Watstein, Adam                   | Adam Watstein      | tt0911004 |
| 1746408641 | 1986 | 1986 | The Imagemaker                                | The Imagemaker                            | Weiner, Hal                      | Hal Weiner         | tt0091259 |
| 1746454408 | 1995 | 1995 | Desolation Angels                             | Desolation Angels                         | McCann, Tim                      | Tim McCann         | tt0116085 |
| 1746235749 | 1979 | 1979 | Something Short of Paradise                   | Something Short of Paradise               | Helpern, David                   | David Helpern      | tt0079931 |
| 1746410418 | 1984 | 1984 | Far From Poland                               | Far from Poland                           | Godmilow, Jill                   | Jill Godmilow      | tt0162318 |
| 1746410532 | 1981 | 1981 | An Eye for an Eye                             | An Eye for an Eye                         | Carver, Steve                    | Steve Carver       | tt0082350 |
| 1746419360 | 1991 | 1991 | Rambling Rose                                 | Rambling Rose                             | Coolidge, Martha                 | Martha Coolidge    | tt0102753 |
| 1745293906 | 2005 | 2005 | Night of Henna                                | Night of Henna                            | Zee, Hassan                      | Hassan Zee         | tt0379402 |
| 1745359906 | 2003 | 2002 | Unprecedented: The 2000 Presidential Election | Unprecedented: The 2000 Presidential Elec | Perez, Richard R.; Sekler, Joan  | Richard Ray Perez  | tt0346091 |
| 1746455422 | 1995 | 1994 | Mod Fuck Explosion                            | Mod Fuck Explosion                        | Moritsugu, Jon                   | Jon Moritsugu      | tt0107587 |
| 1746434855 | 1995 | 1994 | Blessing                                      | Blessing                                  | Zehrer, Paul                     | Paul Zehrer        | tt0109293 |
| 1746393390 | 1987 | 1987 | Cross My Heart                                | Cross My Heart                            | Bernstein, Armyan                | Armyan Bernstein   | tt0092802 |
| 1746248807 | 1976 | 1976 | The Monkey Hustle                             | The Monkey Hu\$tle                        | Marks, Arthur                    | Arthur Marks       | tt0076404 |
| 1746454513 | 1999 | 1999 | Defying Gravity                               | Defying Gravity                           | Keitel, John                     | Matthew Landfield  | tt1475147 |
| 1746455716 | 1997 | 1997 | Gravesend                                     | Gravesend                                 | Stabile, Salvatore               | Salvatore Stabile  | tt0119220 |
| 1746211476 | 1971 | 1971 | The Young Graduates                           | The Young Graduates                       | Anderson, Robert                 | Robert Anderson    | tt0068007 |
| 1746234828 | 1972 | 1972 | The Possession of Joel Delaney                | The Possession of Joel Delaney            | Hussein, Waris                   | Waris Hussein      | tt0067601 |
| 1746436261 | 1999 | 1999 | Some Fish Can Fly                             | Some Fish Can Fly                         | Pappas, Robert Kane              | Robert Kane Pappas | tt0214150 |
| 1746211217 | 1971 | 1971 | Roommates                                     | Roommates                                 | Baran, Jack                      | Jack Baran         | tt0067688 |
| 1745293392 | 2006 | 2006 | The U.S. vs. John Lennon                      | The U.S. vs. John Lennon                  | Leaf, David ; Scheinfeld, John   | David Leaf         | tt0478049 |
| 1746421657 | 1996 | 1996 | The Quest                                     | The Quest                                 | Van Damme, Jean-Claude           | Jean               | tt0117420 |
| 1746393152 | 1981 | 1980 | The Unseen                                    | The Unseen                                | Foleg, Peter                     | Danny Steinmann    | tt0083261 |
| 1746258154 | 1975 | 1975 | Take a Hard Ride                              | Take a Hard Ride                          | Dawson, Anthony M.               | Antonio Margheriti | tt0073784 |
| 1746218838 | 1975 | 1975 | That's the Way of the World                   | That's the Way of the World               | Shore, Sig                       | Sig Shore          | tt0073703 |
| 1746433690 | 1999 | 1998 | Illuminata                                    | Illuminata                                | Turturro, John                   | John Turturro      | tt0120709 |
| 1746436818 | 1992 | 1992 | Brother's Keeper                              | Brother's Keeper                          | Berlinger, Joe ; Sinofsky, Bruce | Joe Berlinger      | tt0103888 |
| 1746257477 | 1975 | 1975 | Sheba, Baby                                   | 'Sheba, Baby'                             | Girdler, William                 | William Girdler    | tt0073697 |
| 1745395384 | 2009 | 2009 | That Evening Sun                              | That Evening Sun                          | Teems, Scott                     | Scott Teems        | tt1114680 |
| 1746235202 | 1980 | 1980 | Honeysuckle Rose                              | Honeysuckle Rose                          | Schatzberg, Jerry                | Jerry Schatzberg   | tt0080888 |
| 1745372574 | 2002 | 2002 | Resident Evil                                 | Resident Evil                             | Anderson, Paul W. S.             | Paul W.S. Anderson | tt0120804 |
| 1746219716 | 1973 | 1972 | Siddhartha                                    | Siddhartha                                | Rooks, Conrad                    | Conrad Rooks       | tt0070689 |
| 1746219693 | 1975 | 1974 | The Sister in Law                             | The Sister in Law                         | Ruben, Joseph                    | Joseph Ruben       | tt0072172 |
| 1769973184 | 1970 | 1970 | Love Thy Neighbor and His Wife                | Love Thy Neighbor and His Wife            | Elliott, B. Ron                  | Byron Mabe         | tt0125868 |



|            |      |      |                                                    |                                               |                                       |                            |           |
|------------|------|------|----------------------------------------------------|-----------------------------------------------|---------------------------------------|----------------------------|-----------|
| 1746409805 | 1989 | 1989 | Meet the Hollowheads                               | Meet the Hollowheads                          | Burman, Tom                           | Thomas R. Burman           | tt0095608 |
| 1745372878 | 2002 | 2001 | Besotted                                           | Besotted                                      | Hardman, Holly Angell                 | Holly Hardman              | tt0220331 |
| 1746409084 | 1990 | 1989 | Martians Go Home                                   | Martians Go Home                              | Odell, David                          | David Odell                | tt0100116 |
| 1745309621 | 2006 | 2005 | An American Haunting                               | An American Haunting                          | Solomon, Courtney                     | Courtney Solomon           | tt0429573 |
| 1746454894 | 1998 | 1998 | Charlie Hoboken                                    | Charlie Hoboken                               | Mazziotti, Thomas F.                  | Thomas F. Mazziotti        | tt0160126 |
| 1745374150 | 2002 | 2002 | The Business of Fancydancing                       | The Business of Fancydancing                  | Alexie, Sherman                       | Sherman Alexie             | tt0303313 |
| 1746269485 | 1976 | 1976 | Go for It                                          | Go for It                                     | Rapp, Paul                            | Paul Rapp                  | tt0249539 |
| 1745309602 | 2007 | 2006 | The Life of Reilly                                 | The Life of Reilly                            | Anderson, Frank; Poltermann, Barry    | Frank L. Anderson          | tt0498366 |
| 1745342486 | 2009 | 2009 | Big Fan                                            | Big Fan                                       | Siegel, Robert                        | Robert D. Siegel           | tt1228953 |
| 1746235280 | 1980 | 1980 | Gilda Live                                         | Gilda Live                                    | Nichols, Mike                         | Mike Nichols               | tt0080790 |
| 1746269475 | 1977 | 1977 | Love and the Midnight Auto Supply                  | Love and the Midnight Auto Supply             | Polakof, James                        | James Polakof              | tt0077872 |
| 1746392902 | 1983 | 1983 | Born in Flames                                     | Born in Flames                                | Borden, Lizzie                        | Lizzie Borden              | tt0085267 |
| 1746423293 | 1998 | 1998 | Blood of His Own                                   | Blood of His Own                              | Zarindast, Tony                       | Tony Zarindast             | tt0166104 |
| 1746408680 | 1988 | 1988 | Messenger of Death                                 | Messenger of Death                            | Thompson, J. Lee                      | J. Lee Thompson            | tt0095626 |
| 1746435018 | 1991 | 1991 | City of Hope                                       | City of Hope                                  | Sayles, John                          | John Sayles                | tt0101588 |
| 1746393376 | 1988 | 1988 | A Time of Destiny                                  | A Time of Destiny                             | Nava, Gregory                         | Gregory Nava               | tt0096271 |
| 1746249509 | 1980 | 1980 | The Apple                                          | The Apple                                     | Golan, Menahem                        | Menahem Golan              | tt0080380 |
| 1746210120 | 1970 | 1970 | Warm in the Bud                                    | Warm in the Bud                               | Caringi, Rudolph                      | Rudolph Caringi            | tt0261402 |
| 1746419914 | 1982 | 1982 | Butterfly                                          | Butterfly                                     | Cimber, Matt                          | Matt Cimber                | tt0082122 |
| 1745272350 | 2000 | 2000 | Snatch                                             | Snatch                                        | Ritchie, Guy                          | Guy Ritchie                | tt0208092 |
| 1746436243 | 1999 | 1999 | Titus                                              | Titus                                         | Taymor, Julie                         | Julie Taymor               | tt0120866 |
| 1745340792 | 2003 | 2002 | Venus Boyz                                         | Venus Boyz                                    | Baur, Gabriel                         | Gabrielle Baur             | tt0293685 |
| 1746235094 | 1971 | 1971 | Simon, King of the Witches                         | Simon, King of the Witches                    | Kessler, Bruce                        | Bruce Kessler              | tt0067757 |
| 1746410141 | 1991 | 1991 | Closet Land                                        | Closet Land                                   | Bharadwaj, Radha                      | Radha Bharadwaj            | tt0101597 |
| 1746393091 | 1988 | 1988 | Patti Rocks                                        | Patti Rocks                                   | Morris, David Burton                  | David Burton Morris        | tt0095835 |
| 1746250341 | 1977 | 1976 | Lost, Lost, Lost                                   | Lost, Lost, Lost                              |                                       | Jonas Mekas                | tt0209110 |
| 1746235305 | 1976 | 1976 | Echoes of a Summer                                 | Echoes of a Summer                            | Taylor, Don                           | Don Taylor                 | tt0074459 |
| 1745374925 | 2008 | 2008 | Gunnin' for That #1 Spot                           | Gunnin' for That #1 Spot                      | Yauch, Adam                           | Adam Yauch                 | tt1204298 |
| 1745303226 | 2007 | 2007 | Tortilla Heaven                                    | Tortilla Heaven                               | Dumontet, Judy Hecht                  | Judy Hecht Dumontet        | tt0227671 |
| 1745302407 | 2006 | 2006 | Jesus Camp                                         | Jesus Camp                                    | Ewing, Heidi ; Grady, Rachel          | Heidi Ewing                | tt0486358 |
| 1745309623 | 2005 | 2005 | The Roost                                          | The Roost                                     | West, Ti                              | Ti West                    | tt0387549 |
| 1745309596 | 2005 | 2004 | Isn't This a Time! A Tribute Concert for Harold Le | Isn't This a Time! A Tribute Concert for Haro | Brown, Jim                            | Jim Brown                  | tt0424189 |
| 1745341632 | 2004 | 2004 | Fighter Pilot: Operation Red Flag                  | Fighter Pilot: Operation Red Flag             | Low, Stephen                          | Stephen Low                | tt0353168 |
| 1745340080 | 2004 | 2004 | Music from the Inside Out                          | Music from the Inside Out                     | Anker, Daniel                         | Daniel Anker               | tt0425274 |
| 1746211492 | 1970 | 1970 | Hospital                                           | Hospital                                      | Wiseman, Frederick                    | Frederick Wiseman          | tt0065853 |
| 1769974240 | 1970 | 1970 | Turned-On Girl                                     | Turned on Girl                                | Walsh, C.                             | C. Walsh                   | tt0260448 |
| 1746420987 | 1992 | 1991 | Together Alone                                     | Together Alone                                | Castellaneta, P. J.                   | P.J. Castellaneta          | tt0105611 |
| 1746568010 | 1932 | 1932 | Faithless                                          | Faithless                                     | Beaumont, Harry                       | Harry Beaumont             | tt0022873 |
| 1746420348 | 1983 | 1984 | Musical Passage                                    | A Musical Passage                             | Brown, Jim                            | Jim Brown                  | tt1625320 |
| 1745293424 | 2005 | 2005 | Man of the House                                   | Man of the House                              | Herek, Stephen                        | David Kern                 | tt0479095 |
| 1745372356 | 2003 | 2002 | Washington Heights                                 | Washington Heights                            | De Villa, Alfredo                     | Alfredo Rodriguez de Villa | tt0314871 |
| 1746235545 | 1977 | 1977 | Thieves                                            | Thieves                                       | Berry, John; Viola, Al; Gardner, Herb | John Berry                 | tt0076815 |
| 1746235736 | 1975 | 1975 | Return to Campus                                   | Return to Campus                              | Cornsweet, Harold                     | Harold Cornsweet           | tt0163810 |
| 1745282738 | 2006 | 2006 | The Sisters                                        | Sisters                                       | Seidelman, Arthur Allan               | Douglas Buck               | tt0486652 |
| 1745282677 | 2006 | 2005 | Murder on the Yellow Brick Road                    | Murder on the Yellow Brick Road               | Hagen, Ross                           | Ross Hagen                 | tt0448874 |
| 1746438550 | 1999 | 1999 | The Straight Story                                 | The Straight Story                            | Lynch, David                          | David Lynch                | tt0166896 |
| 1745272253 | 2000 | 2000 | Sound and Fury                                     | Sound and Fury                                | Aronson, Josh                         | Josh Aronson               | tt0240912 |
| 1745282726 | 2005 | 2004 | Down to the Bone                                   | Down to the Bone                              | Granik, Debra                         | Debra Granik               | tt0363579 |
| 1745393703 | 2008 | 2007 | Greetings from the Shore                           | Greetings from the Shore                      | Chwerchak, Greg                       | Greg Chwerchak             | tt0493421 |
| 1745302760 | 2007 | 2007 | Chuck Close                                        | Chuck Close                                   | Cajori, Marion                        | Marion Cajori              | tt2401362 |
| 1746218780 | 1974 | 1974 | Black Connection                                   | The Black Connection                          | Finn, Michael J.                      | Michael Finn               | tt0188455 |
| 1746409425 | 1981 | 1981 | Force: Five                                        | Force: Five                                   | Clouse, Robert                        | Robert Clouse              | tt0082399 |
| 1745302494 | 2005 | 2005 | Forty Shades of Blue                               | Forty Shades of Blue                          | Sachs, Ira                            | Ira Sachs                  | tt0395543 |
| 1745272436 | 2000 | 2000 | Of Civil Wrongs and Rights: The Fred Korematsu     | Of Civil Wrongs & Rights: The Fred Koremat    | Fournier, Eric Paul                   | Eric Paul Fournier         | tt0254611 |
| 1745373733 | 2003 | 2003 | Going Down                                         | Going Down                                    | Pineda, Joseph A.                     | Dominic Inzana             | tt0360606 |
| 1746250532 | 1977 | 1977 | A Tale of Two Critters                             | A Tale of Two Critters                        |                                       | Jack Speirs                | tt0287003 |
| 1746256576 | 1977 | 1977 | A Piece of the Action                              | A Piece of the Action                         | Poitier, Sidney                       | Sidney Poitier             | tt0076543 |

|                   |             |             |                                        |                                        |                                        |                        |                  |   |
|-------------------|-------------|-------------|----------------------------------------|----------------------------------------|----------------------------------------|------------------------|------------------|---|
| 1746235892        | 1974        | 1974        | Summer Run                             | Summer Run                             | Capetanos, Leon                        | Leon Capetanos         | tt0072227        |   |
| <b>1746421155</b> | <b>1999</b> | <b>2000</b> | <b>R2PC: Road to Park City</b>         | <b>R2PC: Road to Park City</b>         | <b>Stern, Bret</b>                     | <b>Bret Stern</b>      | <b>tt0275615</b> | 1 |
| 1745282717        | 2007        | 2007        | Billy the Kid                          | Billy the Kid                          | Venditti, Jennifer                     | Jennifer Venditti      | tt0971160        |   |
| 1746211058        | 1972        | 1972        | Country Music                          | Country Music                          | Hinkle, Robert                         | Robert Hinkle          | tt2596210        |   |
| 1746256638        | 1976        | 1976        | Woman in the Rain                      | Woman in the Rain                      | Hunt, Paul                             | Paul Hunt              | tt0134219        |   |
| 1745342909        | 2003        | 2002        | Laurel Canyon                          | Laurel Canyon                          | Cholodenko, Lisa                       | Lisa Cholodenko        | tt0298408        |   |
| 1745309631        | 2007        | 2007        | Diggers                                | Diggers                                | Dieckmann, Katherine                   | Cheryl Slean           | tt1078282        |   |
| 1769973177        | 1970        | 1970        | Lisa's Folly                           | Lisa's Folly                           |                                        | John Alderman          | tt0249733        |   |
| 1745359373        | 2008        | 2007        | Moving Midway                          | Moving Midway                          | Cheshire, Godfrey                      | Godfrey Cheshire       | tt1051245        |   |
| 1746491762        | 1943        | 1943        | Tiger Fangs                            | Tiger Fangs                            | Newfield, Sam                          | Sam Newfield           | tt0036439        |   |
| 1746515421        | 1922        | 1922        | Texas                                  | Texas                                  | Bertram, William                       | William Bertram        | tt0169304        |   |
| 1746584878        | 1939        | 1939        | Parents on Trial                       | Parents on Trial                       | Nelson, Sam                            | Sam Nelson             | tt0031786        |   |
| 1746500699        | 1925        | 1925        | Wolves of the Road                     | Wolves of the Road                     | Hayes, Ward                            | Ward Hayes             | tt0127978        |   |
| 1746585306        | 1929        | 1929        | Fugitives                              | Fugitives                              | Beaudine, William                      | William Beaudine       | tt0019912        |   |
| 1746500269        | 1924        | 1924        | Cytherea                               | Cytherea                               | Fitzmaurice, George                    | George Fitzmaurice     | tt0014816        |   |
| 1746576858        | 1931        | 1931        | Body and Soul                          | Body and Soul                          | Santell, Alfred                        | Alfred Santell         | tt0021680        |   |
| 1746577988        | 1939        | 1939        | The Angels Wash Their Faces            | Angels Wash Their Faces                | Enright, Ray                           | Ray Enright            | tt0031045        |   |
| 1745372701        | 2008        | 2008        | Finding Amanda                         | Finding Amanda                         | Tolan, Peter                           | Peter Tolan            | tt0889134        |   |
| 1746567082        | 1933        | 1933        | Pilgrimage                             | Pilgrimage                             | Ford, John                             | John Ford              | tt0024453        |   |
| 1746393069        | 1984        | 1984        | Harry & Son                            | Harry & Son                            | Newman, Paul                           | Paul Newman            | tt0087386        |   |
| 1746200582        | 1968        | 1968        | Tarzan and the Jungle Boy              | Tarzan and the Jungle Boy              | Gordon, Robert                         | Robert Gordon          | tt0063673        |   |
| 1746570408        | 1934        | 1934        | Shock                                  | Shock                                  | Pomeroy, Roy J.                        | Roy Pomeroy            | tt0025782        |   |
| 1746562035        | 1956        | 1956        | The Tahitian                           | The Tahitian                           | Knott, James                           | James Knott            | tt0049820        |   |
| 1746409821        | 1985        | 1985        | Always                                 | Always                                 | Jaglom, Henry                          | Henry Jaglom           | tt0088701        |   |
| 1746578481        | 1963        | 1963        | A Swingin' Affair                      | A Swingin' Affair                      | Lawrence, Jay O.                       | Jay O. Lawrence        | tt0057545        |   |
| 1746555334        | 1957        | 1957        | The Big Land                           | The Big Land                           | Douglas, Gordon                        | Gordon Douglas         | tt0050192        |   |
| 1746501194        | 1915        | 1915        | The Warrens of Virginia                | The Warrens of Virginia                | DeMille, Cecil B.                      | Cecil B. DeMille       | tt0006243        |   |
| 1746507779        | 1924        | 1924        | Geared To Go                           | Geared To Go                           | Rogell, Albert                         | Albert S. Rogell       | tt0133789        |   |
| 1746485880        | 1919        | 1919        | A Rogue's Romance                      | A Rogue's Romance                      | Young, James                           | James Young            | tt0177178        |   |
| 1746520809        | 1926        | 1926        | The Lovin' Fool                        | The Lovin' Fool                        | Carpenter, H. B.                       | Horace B. Carpenter    | tt0333836        |   |
| 1746198254        | 1969        | 1969        | The Wild Bunch                         | The Wild Bunch                         | Peckinpah, Sam                         | Sam Peckinpah          | tt0065214        |   |
| 1746509266        | 1926        | 1926        | Bachelor Brides                        | Bachelor Brides                        | Howard, William K.                     | William K. Howard      | tt0016617        |   |
| 1746525099        | 1920        | 1920        | The Toll Gate                          | The Toll Gate                          | Hillyer, Lambert                       | Lambert Hillyer        | tt0011779        |   |
| 1746556039        | 1957        | 1957        | Omar Khayyam                           | Omar Khayyam                           | Dieterle, William                      | William Dieterle       | tt0050799        |   |
| 1746508123        | 1925        | 1925        | Oh, Doctor!                            | Oh, Doctor!                            | Pollard, Harry A.                      | Harry A. Pollard       | tt0016172        |   |
| 1746566849        | 1934        | 1934        | Randy Rides Alone                      | Randy Rides Alone                      | Fraser, Harry                          | Harry L. Fraser        | tt0025699        |   |
| 1746514060        | 1922        | 1922        | Dawn of Revenge                        | Dawn of Revenge                        | Sievel, Bernard                        | Bernard Sievel         | tt0013054        |   |
| 1746475905        | 1946        | 1946        | Swing, Cowboy, Swing                   | Swing, Cowboy, Swing                   | Clifton, Elmer                         | Elmer Clifton          | tt0313673        |   |
| 1746512316        | 1923        | 1923        | The Rustle of Silk                     | The Rustle of Silk                     | Brenon, Herbert                        | Herbert Brenon         | tt0014425        |   |
| 1746583840        | 1930        | 1930        | Pure and Simple                        | Pure and Simple                        | Foster, Lewis R.                       | Lewis R. Foster        | tt0832936        |   |
| 1769972673        | 1963        | 1963        | The Orgy at Lil's Place                | The Orgy at Lil's Place                | Nehemiah, J.                           | Jerald Intrator        | tt0134873        |   |
| 1746578849        | 1950        | 1950        | Outlaws of Texas                       | Outlaws of Texas                       | Carr, Thomas                           | Thomas Carr            | tt0042823        |   |
| 1746583366        | 1929        | 1929        | The Wheel of Life                      | The Wheel of Life                      | Schertzinger, Victor                   | Victor Schertzinger    | tt0020577        |   |
| 1746578447        | 1951        | 1951        | A Yank in Korea                        | A Yank in Korea                        | Landers, Lew                           | Lew Landers            | tt0044220        |   |
| 1746574256        | 1963        | 1963        | Gentlemen Prefer Nature Girls          | Gentlemen Prefer Nature Girls          | Wishman, Doris                         | Doris Wishman          | tt0056015        |   |
| 1746464914        | 1945        | 1945        | Man from Oklahoma                      | Man from Oklahoma                      | McDonald, Frank                        | Frank McDonald         | tt0037894        |   |
| 1746474796        | 1944        | 1944        | Phantom Lady                           | Phantom Lady                           | Siodmak, Robert                        | Robert Siodmak         | tt0036260        |   |
| 1746554898        | 1954        | 1954        | The Cowboy                             | The Cowboy                             | Williams, Elmo                         | Elmo Williams          | tt0239316        |   |
| 1746501751        | 1914        | 1914        | Nell of the Circus                     | Nell of the Circus                     |                                        | Cecil Spooner          | tt0004389        |   |
| <b>1746578886</b> | <b>1950</b> | <b>1950</b> | <b>This Side of the Law</b>            | <b>This Side of the Law</b>            | <b>Bare, Richard</b>                   | <b>Richard L. Bare</b> | <b>tt0043040</b> | 1 |
| 1745303237        | 2006        | 2006        | What the Bleep!?: Down the Rabbit Hole | What the Bleep!?: Down the Rabbit Hole | Arntz, William ; Chasse, Betsy ; Vicen | William Arntz          | tt0499596        |   |
| 1746520961        | 1950        | 1950        | The Girl from San Lorenzo              | The Girl from San Lorenzo              | Abrahams, Derwin                       | Derwin Abrahams        | tt0042506        |   |
| 1746508464        | 1926        | 1926        | The Eagle of the Sea                   | The Eagle of the Sea                   | Lloyd, Frank                           | Frank Lloyd            | tt0016815        |   |
| 1746566052        | 1958        | 1958        | Raw Wind in Eden                       | Raw Wind in Eden                       | Wilson, Richard                        | Richard Wilson         | tt0052121        |   |
| 1746573872        | 1962        | 1962        | Dangerous Charter                      | Dangerous Charter                      | Gottschalk, Robert                     | Robert Gottschalk      | tt0055887        |   |
| 1746508963        | 1924        | 1924        | Wine                                   | Wine                                   | Gasnier, Louis J.                      | Louis J. Gasnier       | tt0015499        |   |
| 1746511759        | 1916        | 1916        | And the Law Says                       | And the Law Says                       |                                        | Richard Bennett        | tt0006362        |   |

|            |      |      |                                    |                                    |                                       |                                     |           |
|------------|------|------|------------------------------------|------------------------------------|---------------------------------------|-------------------------------------|-----------|
| 1746554616 | 1964 | 1964 | The Eyes of Annie Jones            | The Eyes of Annie Jones            | Le Borg, Reginald                     | Reginald Le Borg                    | tt0058075 |
| 1746578657 | 1963 | 1963 | House of Dreams                    | House of Dreams                    | Berry, Robert                         | Robert Berry                        | tt0057159 |
| 1746549959 | 1954 | 1954 | Fangs of the Wild                  | Fangs of the Wild                  | Claxton, William                      | William F. Claxton                  | tt0046965 |
| 1746583787 | 1929 | 1929 | His Captive Woman                  | His Captive Woman                  | Fitzmaurice, George                   | George Fitzmaurice                  | tt0019986 |
| 1746512047 | 1916 | 1916 | The Thoroughbred                   | The Thoroughbred                   | Bartlett, Charles                     | Charles Bartlett                    | tt0159021 |
| 1746580366 | 1935 | 1935 | The Texas Rambler                  | The Texas Rambler                  | Hill, Robert                          | Robert F. Hill                      | tt0027086 |
| 1746508494 | 1926 | 1926 | College Days                       | College Days                       | Thorpe, Richard                       | Richard Thorpe                      | tt0016734 |
| 1746577335 | 1963 | 1963 | Toys in the Attic                  | Toys in the Attic                  | Hill, George Roy                      | George Roy Hill                     | tt0057598 |
| 1746583728 | 1928 | 1928 | The Broken Mask                    | The Broken Mask                    | Hogan, James P.                       | James P. Hogan                      | tt0018725 |
| 1746487488 | 1919 | 1919 | Anne of Green Gables               | Anne of Green Gables               | Taylor, William Desmond               | William Desmond Taylor              | tt0009879 |
| 1745309650 | 2007 | 2006 | Caffeine                           | Caffeine                           | Cosgrove, John                        | John Cosgrove                       | tt0460732 |
| 1746554504 | 1965 | 1965 | How to Stuff a Wild Bikini         | How to Stuff a Wild Bikini         | Asher, William                        | William Asher                       | tt0059287 |
| 1746496813 | 1921 | 1921 | I Am the Woman                     | I Am the Woman                     | Ford, Francis                         | Francis Ford                        | tt0361728 |
| 1746562338 | 1953 | 1953 | Mystery Lake                       | Mystery Lake                       |                                       | Larry Lansburgh                     | tt0046111 |
| 1746582001 | 1929 | 1929 | The Bachelor Girl                  | The Bachelor Girl                  | Thorpe, Richard                       | Richard Thorpe                      | tt0019667 |
| 1746578747 | 1960 | 1959 | The Louisiana Hussy                | The Louisiana Hussy                | Sholem, Lee                           | Lee Sholem                          | tt0122159 |
| 1746232959 | 1968 | 1968 | A Flea in Her Ear                  | A Flea in Her Ear                  | Charon, Jacques                       | Jacques Charon                      | tt0062978 |
| 1746577806 | 1936 | 1936 | Desire                             | Desire                             | Borzage, Frank                        | Frank Borzage                       | tt0027515 |
| 1746504609 | 1922 | 1922 | The Bond Boy                       | The Bond Boy                       | King, Henry                           | Henry King                          | tt0012959 |
| 1746184611 | 1965 | 1965 | The Playground                     | The Playground                     | Hilliard, Richard                     | Richard Hilliard                    | tt0059606 |
| 1746234455 | 1967 | 1968 | Sofi                               | Sofi                               | Carlisle, Robert                      | Robert G. Carlisle                  | tt0062283 |
| 1746581329 | 1910 | 1910 | Hank and Lank: Uninvited Guests    | Hank and Lank: Uninvited Guests    |                                       | Gilbert M. 'Broncho Billy' Anderson | tt0206799 |
| 1746515024 | 1914 | 1914 | The Fortune Hunter                 | The Fortune Hunter                 | O'Neil, Barry                         | Barry O'Neil                        | tt0003988 |
| 1746514372 | 1923 | 1923 | Wandering Daughters                | Wandering Daughters                | Young, James                          | James Young                         | tt0014587 |
| 1769971103 | 1969 | 1969 | The Master Beater                  | The Master Beater                  | Carmello, Charles                     | Charles Carmello                    | tt0251236 |
| 1746251012 | 1980 | 1980 | Oh, God! Book II                   | Oh, God! Book II                   | Cates, Gilbert                        | Gilbert Cates                       | tt0081268 |
| 1746561839 | 1957 | 1956 | Ride the High Iron                 | Ride the High Iron                 | Weis, Don                             | Don Weis                            | tt0049675 |
| 1746583929 | 1930 | 1930 | Second Wife                        | Second Wife                        | Mack, Russell                         | Russell Mack                        | tt0021353 |
| 1746565933 | 1956 | 1956 | Lovers and Lollipops               | Lovers and Lollipops               | Engel, Morris; Orkin, Ruth            | Morris Engel                        | tt0049453 |
| 1746514981 | 1922 | 1922 | Her Own Story                      | Her Own Story                      |                                       |                                     | tt0330385 |
| 1746409081 | 1983 | 1983 | Eddie and the Cruisers             | Eddie and the Cruisers             | Davidson, Martin                      | Martin Davidson                     | tt0085475 |
| 1746497925 | 1922 | 1922 | The Kentucky Derby                 | The Kentucky Derby                 | Baggot, King                          | King Baggot                         | tt0013288 |
| 1746582874 | 1935 | 1935 | Now or Never                       | Now or Never                       | Ray, Bernard B.                       | Bernard B. Ray                      | tt0026794 |
| 1746393420 | 1986 | 1986 | Modern Girls                       | Modern Girls                       | Kramer, Jerry                         | Jerry Kramer                        | tt0091534 |
| 1746468013 | 1917 | 1917 | The Fringe of Society              | The Fringe of Society              | Ellis, Robert                         | Robert Ellis                        | tt0007979 |
| 1746569742 | 1953 | 1953 | The Stranger Wore a Gun            | The Stranger Wore a Gun            | DeToth, Andre                         | André De Toth                       | tt0046375 |
| 1746502189 | 1910 | 1910 | A Plain Song                       | A Plain Song                       | Griffith, D. W.                       | D.W. Griffith                       | tt0001362 |
| 1746574516 | 1934 | 1934 | The Lawless Frontier               | The Lawless Frontier               | Bradbury, R. N.                       | Robert N. Bradbury                  | tt0025373 |
| 1746580918 | 1950 | 1950 | Rogues of Sherwood Forest          | Rogues of Sherwood Forest          | Douglas, Gordon                       | Gordon Douglas                      | tt0042901 |
| 1746583490 | 1929 | 1929 | Cowboy Cavalier                    | Cowboy Cavalier                    |                                       |                                     | tt0355349 |
| 1746577937 | 1939 | 1939 | Trapped in the Sky                 | Trapped in the Sky                 | Collins, Lewis D.                     | Lewis D. Collins                    | tt0032051 |
| 1746524916 | 1923 | 1923 | April Showers                      | April Showers                      | Forman, Tom                           | Tom Forman                          | tt0013837 |
| 1746574582 | 1933 | 1933 | I Have Lived                       | I Have Lived                       | Thorpe, Richard                       | Richard Thorpe                      | tt0024153 |
| 1746584791 | 1928 | 1928 | The Cohens and the Kellys in Paris | The Cohens and the Kellys in Paris | Beaudine, William                     | William Beaudine                    | tt0018782 |
| 1746465323 | 1945 | 1945 | The Stork Club                     | The Stork Club                     | Walker, Hal                           | Hal Walker                          | tt0038119 |
| 1746256572 | 1975 | 1974 | Alice Doesn't Live Here Anymore    | Alice Doesn't Live Here Anymore    | Scorsese, Martin                      | Martin Scorsese                     | tt0071115 |
| 1746554717 | 1964 | 1964 | Looking for Love                   | Looking for Love                   | Weis, Don                             | Don Weis                            | tt0059398 |
| 1746577365 | 1963 | 1963 | She Should Have Stayed in Bed      | She Should Have Stayed in Bed      | Mahon, Barry                          | Barry Mahon                         | tt0128483 |
| 1746258545 | 1976 | 1976 | The Big Bus                        | The Big Bus                        | Frawley, James                        | James Frawley                       | tt0074205 |
| 1746219337 | 1976 | 1976 | Car Wash                           | Car Wash                           | Schultz, Michael                      | Michael Schultz                     | tt0074281 |
| 1746500830 | 1915 | 1915 | The Wild Goose Chase               | The Wild Goose Chase               | DeMille, Cecil B.                     | Cecil B. DeMille                    | tt0006288 |
| 1746583681 | 1929 | 1929 | Montmartre Rose                    | Montmartre Rose                    | McEveety, Bernard F.; Hiatt, Frederic | Frederick Hiatt                     | tt0020183 |
| 1769971197 | 1969 | 1969 | The Daisy Chain                    | The Daisy Chain                    | Davis, Don                            | Donald A. Davis                     | tt0216652 |
| 1746499905 | 1925 | 1925 | Let's Go, Gallagher                | Let's Go, Gallagher                | De Lacey, Robert; Gruen, James        | Robert De Lacey                     | tt0015063 |
| 1746566170 | 1958 | 1958 | Lost, Lonely and Vicious           | Lost, Lonely and Vicious           | Myers, Frank                          | Frank Myers                         | tt0141563 |
| 1746574176 | 1962 | 1962 | Blaze Starr Goes Nudist            | Blaze Starr Goes Nudist            | Wishman, Doris                        | Doris Wishman                       | tt0053658 |
| 1746573491 | 1910 | 1910 | A Close Shave                      | A Close Shave                      |                                       | Gilbert M. 'Broncho Billy' Anderson | tt0372216 |

|            |      |      |                                                  |                                               |                                      |                    |           |
|------------|------|------|--------------------------------------------------|-----------------------------------------------|--------------------------------------|--------------------|-----------|
| 1746577866 | 1937 | 1937 | The Thirteenth Chair                             | The Thirteenth Chair                          | Seitz, George B.                     | George B. Seitz    | tt0029661 |
| 1746542634 | 1925 | 1925 | Youth's Gamble                                   | Youth's Gamble                                | Rogell, Albert                       | Albert S. Rogell   | tt0016557 |
| 1746513059 | 1915 | 1915 | Sunshine Molly                                   | Sunshine Molly                                | Weber, Lois; Smalley, Phillips       | Phillips Smalley   | tt0006119 |
| 1746465042 | 1941 | 1941 | Rage in Heaven                                   | Rage in Heaven                                | Van Dyke, W. S.; Sinclair, Robert B. | W. S. Van Dyke     | tt0034078 |
| 1746524639 | 1923 | 1923 | The Christian                                    | The Christian                                 | Tourneur, Maurice                    | Maurice Tourneur   | tt0013924 |
| 1746583424 | 1930 | 1929 | Love at First Sight                              | Love at First Sight                           | Lewis, Edgar                         | Edgar Lewis        | tt0021099 |
| 1746486517 | 1921 | 1921 | Western Hearts                                   | Western Hearts                                | Smith, Cliff                         | Clifford Smith     | tt0177385 |
| 1746233957 | 1966 | 1966 | More Milk Evette                                 | More Milk, Evette                             | Warhol, Andy                         | Andy Warhol        | tt0251861 |
| 1746492583 | 1948 | 1948 | Sofia                                            | Sofia                                         | Reinhardt, John                      | John Reinhardt     | tt0040815 |
| 1746504359 | 1918 | 1918 | The Flash of Fate                                | The Flash of Fate                             | Clifton, Elmer                       | Elmer Clifton      | tt0009078 |
| 1746184397 | 1965 | 1965 | Hawaiian Thigh                                   | Hawaiian Thigh                                | Felderman, Bob                       | Bob Felderman      | tt3623950 |
| 1746585201 | 1930 | 1930 | She's My Weakness                                | She's My Weakness                             | Brown, Melville                      | Melville W. Brown  | tt0021362 |
| 1745340126 | 2004 | 2004 | Going Upriver: The Long War of John Kerry        | Going Upriver: The Long War of John Kerry     | Butler, George                       | George Butler      | tt0407263 |
| 1746210844 | 1971 | 1971 | Blue Water, White Death                          | Blue Water, White Death                       | Gimbel, Peter; Lipscomb, James       | Peter Gimbel       | tt0146496 |
| 1745341517 | 2011 | 2010 | Fat, Sick & Nearly Dead                          | Fat, Sick & Nearly Dead                       | Cross, Joe; Engfehr, Kurt            | Joe Cross          | tt1227378 |
| 1746198767 | 1970 | 1970 | Why Russians Are Revolting                       | Why Russians Are Revolting                    | Sullivan, Neil                       | Neil Sullivan      | tt0260569 |
| 1745393680 | 2009 | 2009 | Up in the Air                                    | Up in the Air                                 | Reitman, Jason                       | Wes Llewellyn      | tt1401642 |
| 1745359285 | 2003 | 2003 | Dopamine                                         | Dopamine                                      | Decena, Mark                         | Mark Decena        | tt0342300 |
| 1746455144 | 1999 | 1998 | Telling You                                      | Telling You                                   | DeFranco, Robert                     | Rob DeFranco       | tt0120859 |
| 1746234820 | 1971 | 1971 | The Velvet Vampire                               | The Velvet Vampire                            | Rothman, Stephanie                   | Stephanie Rothman  | tt0067929 |
| 1746250424 | 1980 | 1981 | Survival Run                                     | Survival Run                                  | Spiegel, Larry                       | Robert Charlton    | tt0475746 |
| 1745342647 | 2002 | 2003 | The Nazi Officer's Wife                          | The Nazi Officer's Wife                       | Garbus, Liz                          | Liz Garbus         | tt0352621 |
| 1746394542 | 1991 | 1991 | Mortal Thoughts                                  | Mortal Thoughts                               | Rudolph, Alan                        | Alan Rudolph       | tt0102469 |
| 1746420404 | 1989 | 1989 | Physical Evidence                                | Physical Evidence                             | Crichton, Michael                    | Michael Crichton   | tt0098093 |
| 1745293996 | 2005 | 2005 | Crash                                            | Crash                                         | Haggis, Paul                         | Christopher Jarvis | tt0965408 |
| 1746410180 | 1986 | 1986 | Getting Even                                     | Getting Even                                  | Little, Dwight H.                    | Dwight H. Little   | tt0091108 |
| 1745309599 | 2006 | 2006 | They're Just My Friends                          | They're Just My Friends                       | Torrence, Attika J.                  | Attika Torrence    | tt0473402 |
| 1746235549 | 1975 | 1974 | Birds Do It, Bees Do It                          | Birds Do It, Bees Do It                       | Noxon, Nicolas                       | Nicolas Noxon      | tt0072703 |
| 1745374593 | 2008 | 2008 | The Fall                                         | The Fall                                      | Tarsem                               | Aaron Wallace      | tt1381762 |
| 1746269903 | 1979 | 1979 | Beyond the Poseidon Adventure                    | Beyond the Poseidon Adventure                 | Allen, Irwin                         | Irwin Allen        | tt0078856 |
| 1746235714 | 1973 | 1973 | The Young Nurses                                 | The Young Nurses                              | Kimbrough, Clinton                   | Clint Kimbrough    | tt0070944 |
| 1746219176 | 1974 | 1974 | The Ultimate Thrill                              | The Ultimate Thrill                           | Butler, Robert                       | Robert Butler      | tt0072335 |
| 1746251509 | 1980 | 1979 | In Search of Historic Jesus                      | In Search of Historic Jesus                   | Schellerup, Henning                  | Henning Schellerup | tt0080919 |
| 1746455864 | 1995 | 1995 | Davy Jones' Locker                               | Davy Jones' Locker                            | Jacoby, Joseph                       | Joseph Jacoby      | tt0112809 |
| 1746235599 | 1976 | 1976 | Across the Great Divide                          | Across the Great Divide                       | Raffill, Stewart                     | Stewart Raffill    | tt0075629 |
| 1746439113 | 1998 | 1997 | Swept from the Sea                               | Swept from the Sea                            | Kidron, Beeban                       | Beeban Kidron      | tt0120257 |
| 1746435324 | 1989 | 1989 | The Kill-Off                                     | The Kill Off                                  | Greenwald, Maggie                    | Maggie Greenwald   | tt0097665 |
| 1745340461 | 2002 | 2002 | Crazy as Hell                                    | Crazy as Hell                                 | La Salle, Eriq                       | Eriq La Salle      | tt0285487 |
| 1745272499 | 2000 | 2000 | Urbania                                          | Urbania                                       | Shear, Jon                           | Jon Shear          | tt0182508 |
| 1745341995 | 2008 | 2008 | The Reflecting Pool                              | The Reflecting Pool                           | Kupsc, Jarek                         | Jarek Kupsc        | tt1015468 |
| 1745374991 | 2008 | 2007 | Liberty Kid                                      | Liberty Kid                                   | Chaiken, Ilya                        | Ilya Chaiken       | tt0850307 |
| 1746419374 | 1993 | 1993 | Time Indefinite                                  | Time Indefinite                               | McElwee, Ross                        | Ross McElwee       | tt0108341 |
| 1746456107 | 1996 | 1995 | The Pompatus of Love                             | The Pompatus of Love                          | Schenkman, Richard                   | Richard Schenkman  | tt0117357 |
| 1745342481 | 2010 | 2009 | Severe Clear                                     | Severe Clear                                  | Fraga, Kristian                      | Kristian Fraga     | tt0494826 |
| 1745372350 | 2009 | 2008 | The Merry Gentleman                              | The Merry Gentleman                           | Keaton, Michael                      | Michael Keaton     | tt0967945 |
| 1746209928 | 1970 | 1970 | Story of a Woman                                 | Story of a Woman                              | Bercovici, Leonardo                  | Leonardo Bercovici | tt0066410 |
| 1769973200 | 1970 | 1970 | Sex Rituals of the Occult                        | Sex Ritual of the Occult                      |                                      | Robert Caramico    | tt0066359 |
| 1745309589 | 2007 | 2007 | The Hoax                                         | Thax                                          | Hallström, Lasse                     | Alex MacKenzie     | tt1424558 |
| 1746261179 | 1980 | 1980 | Hide in Plain Sight                              | Hide in Plain Sight                           | Caan, James                          | James Caan         | tt0080868 |
| 1746437105 | 1998 | 1998 | War Zone                                         | War Zone                                      | Hadleigh-West, Maggie                | Maggie Hadleigh    | tt0210380 |
| 1746210956 | 1974 | 1973 | Ladies and Gentlemen, The Rolling Stones         | Ladies and Gentlemen: The Rolling Stones      | Binzer, Rollin                       | Rollin Binzer      | tt0070283 |
| 1746455711 | 1998 | 1998 | A Paralyzing Fear: The Story of Polio In America | A Paralyzing Fear: The Story of Polio in Amer | Seavey, Nina Gilden                  | Nina Gilden Seavey | tt0145302 |
| 1746420135 | 1988 | 1988 | The Penitent                                     | The Penitent                                  | Osmond, Cliff                        | Cliff Osmond       | tt0095845 |
| 1746235480 | 1974 | 1974 | The Fighters                                     | The Fighters                                  | Greaves, William                     | Rick Baxter        | tt0162844 |
| 1745342901 | 2010 | 2009 | Punching the Clown                               | Punching the Clown                            | Viens, Gregori                       | Gregori Viens      | tt1192624 |
| 1769971111 | 1969 | 1970 | The Love Doctors                                 | The Love Doctors                              | Ross, Bon                            | Bon Ross           | tt0250519 |
| 1746218826 | 1972 | 1972 | Sitting Target                                   | Sitting Target                                | Hickox, Douglas                      | Douglas Hickox     | tt0069273 |

|            |      |      |                                                   |                                                   |                                                     |                       |           |
|------------|------|------|---------------------------------------------------|---------------------------------------------------|-----------------------------------------------------|-----------------------|-----------|
| 1745302757 | 2006 | 2005 | Erosion                                           | Erosion                                           | Lu, Ann                                             | Ann Lu                | tt0377864 |
| 1746454174 | 1997 | 1996 | Timeless                                          | Timeless                                          | Hart, Chris                                         | Chris Hart            | tt0117914 |
| 1746210629 | 1970 | 1970 | The Last Escape                                   | The Last Escape                                   | Grauman, Walter                                     | Walter Grauman        | tt0065966 |
| 1746219174 | 1978 | 1977 | Checkered Flag or Crash                           | Checkered Flag or Crash                           | Gibson, Alan                                        | Alan Gibson           | tt0075831 |
| 1745303088 | 2004 | 2003 | Jandek on Corwood                                 | Jandek on Corwood                                 | Freidrichs, Chad                                    | Chad Freidrichs       | tt0381287 |
| 1746421730 | 1993 | 1993 | King of the Hill                                  | King of the Hill                                  | Soderbergh, Steven                                  | Steven Soderbergh     | tt0107322 |
| 1746423260 | 1996 | 1995 | The Wife                                          | The Wife                                          | Noonan, Tom                                         | Tom Noonan            | tt0114936 |
| 1746250564 | 1976 | 1976 | The River Niger                                   | The River Niger                                   | Shah, Krishna; Allen, Sylvester; Gold; Krishna Shah | Krishna Shah          | tt0075145 |
| 1746409493 | 1983 | 1983 | The Osterman Weekend                              | The Osterman Weekend                              | Peckinpah, Sam                                      | Sam Peckinpah         | tt0086058 |
| 1746455335 | 1995 | 1995 | Circle of Friends                                 | Circle of Friends                                 | O'Connor, Pat                                       | Pat O'Connor          | tt0112679 |
| 1746433766 | 1991 | 1991 | Pizza Man                                         | Pizza Man                                         | Athens, J. D.                                       | J.F. Lawton           | tt0102676 |
| 1745396036 | 2008 | 2008 | The Beautiful Truth                               | The Beautiful Truth                               | Kroschel, Steve                                     | Steve Kroschel        | tt1288553 |
| 1746435406 | 1999 | 1999 | Wisconsin Death Trip                              | Wisconsin Death Trip                              | Marsh, James                                        | James Marsh           | tt0210389 |
| 1746454205 | 1996 | 1996 | Mad Dog Time                                      | Mad Dog Time                                      | Bishop, Larry                                       | Larry Bishop          | tt0116953 |
| 1746408877 | 1992 | 1992 | My Mother's Murder                                | My Mother's Murder                                | Stuart, Charles C.                                  | Charles C. Stuart     | tt0331576 |
| 1746455094 | 1998 | 1997 | Crossing Fields                                   | Crossing Fields                                   | Rosenow, James                                      | James Rosenow         | tt0177666 |
| 1746408911 | 1990 | 1990 | Antigone/Rites of Passion                         | Antigone/Rites of Passion                         | Greenfield, Amy                                     | Amy Greenfield        | tt0331423 |
| 1746439214 | 1998 | 1998 | Love & War II                                     | Love and War II                                   | Khan, Sartaj                                        | James Tyler           | tt0293856 |
| 1746218696 | 1971 | 1971 | The Tender Warrior                                | The Tender Warrior                                | Raffill, Stewart                                    | Stewart Raffill       | tt0190065 |
| 1746421006 | 1994 | 1994 | Art Deco Detective                                | Art Deco Detective                                | Mora, Philippe                                      | Philippe Mora         | tt0109153 |
| 1745375162 | 2009 | 2008 | Gogol Bordello Non-Stop                           | Gogol Bordello Non Stop                           | Jimeno, Margarita                                   | Margarita Jimeno      | tt0477002 |
| 1746394442 | 1982 | 1982 | Boxoffice                                         | Boxoffice                                         | Bogdanovich, Josef                                  | Josef Bogdanovich     | tt0173688 |
| 1746219232 | 1974 | 1973 | The Great American Cowboy                         | The Great American Cowboy                         | Merrill, Kieth                                      | Kieth Merrill         | tt0070135 |
| 1746210732 | 1973 | 1972 | A Reflection of Fear                              | A Reflection of Fear                              | Fraker, William A.                                  | William A. Fraker     | tt0070599 |
| 1746218687 | 1972 | 1972 | Legend of Horror                                  | Legend of Horror                                  | Davies, Bill                                        | Bill Davies           | tt0140324 |
| 1745342074 | 2001 | 2001 | Won't Anybody Listen                              | Won't Anybody Listen                              | Kelemer, Dow                                        | Dov Kelemer           | tt0281376 |
| 1746250328 | 1977 | 1977 | Handle with Care                                  | Handle with Care                                  | Demme, Jonathan                                     | Alan Rafkin           | tt2849914 |
| 1746420359 | 1982 | 1981 | She Dances Alone                                  | She Dances Alone                                  | Dornhelm, Robert                                    | Robert Dornhelm       | tt0083065 |
| 1745358662 | 2011 | 2010 | Blank City                                        | Blank City                                        | Danhier, Celine                                     | Celine Danhier        | tt1398949 |
| 1745303012 | 2006 | 2006 | Miriam                                            | Miriam                                            | Cimber, Matt                                        | Matt Cimber           | tt0449318 |
| 1746219546 | 1972 | 1971 | Welcome Home Soldier Boys                         | Welcome Home, Soldier Boys                        | Compton, Richard                                    | Richard Compton       | tt0069491 |
| 1746435319 | 2000 | 2000 | Poor White Trash                                  | Poor White Trash                                  | Addis, Michael                                      | Michael Addis         | tt0204350 |
| 1746218897 | 1975 | 1975 | Best Friends                                      | Best Friends                                      | Nosseck, Noel                                       | Noel Nosseck          | tt0072695 |
| 1745373211 | 2003 | 2003 | Beah: A Black Woman Speaks                        | Beah: A Black Woman Speaks                        | Hamilton, Lisa Gay                                  | LisaGay Hamilton      | tt0350596 |
| 1746393083 | 1985 | 1984 | Prince Jack                                       | Prince Jack                                       | Lovitt, Bert                                        | Bert Lovitt           | tt0087943 |
| 1745302413 | 2005 | 2005 | The Constant Gardener                             | The Constant Gardener                             | Meirelles, Fernando                                 | Fernando Meirelles    | tt0387131 |
| 1746218660 | 1971 | 1971 | Mary, Queen of Scots                              | Mary, Queen of Scots                              | Jarrott, Charles                                    | Charles Jarrott       | tt0067402 |
| 1746219201 | 1974 | 1974 | The Legend of Earl Durand                         | The Legend of Earl Durand                         | Patterson, John D.                                  | John D. Patterson     | tt0071745 |
| 1745293223 | 2005 | 2004 | Be Here to Love Me: A Film About Townes van Zandt | Be Here to Love Me: A Film About Townes Van Zandt | Brown, Margaret                                     | Margaret Brown        | tt0423853 |
| 1745342219 | 2004 | 2004 | Off the Lip                                       | Off the Lip                                       | Mickelson, Robert                                   | Robert Mickelson      | tt0223828 |
| 1746434369 | 1997 | 1997 | The Wings of the Dove                             | The Wings of the Dove                             | Softley, Iain                                       | Iain Softley          | tt0120520 |
| 1746218894 | 1973 | 1973 | Fox Style                                         | Fox Style                                         | Houston, Clyde                                      | Clyde Houston         | tt0174655 |
| 1746219086 | 1975 | 1975 | Yessongs                                          | Yessongs                                          | Neal, Peter                                         | Peter Neal            | tt0070940 |
| 1745341863 | 2002 | 2002 | Daughter from Danang                              | Daughter from Danang                              | Dolgin, Gail ; Franco, Vicente                      | Gail Dolgin           | tt0303281 |
| 1746218684 | 1973 | 1973 | Kid Blue                                          | Kid Blue                                          | Frawley, James                                      | James Frawley         | tt0070267 |
| 1746410133 | 1990 | 1990 | The Fourth War                                    | The Fourth War                                    | Frankenheimer, John                                 | John Frankenheimer    | tt0099606 |
| 1746410624 | 1982 | 1982 | I'm Dancing As Fast As I Can                      | I'm Dancing as Fast as I Can                      | Hofsiss, Jack                                       | Jack Hofsiss          | tt0084111 |
| 1746235093 | 1971 | 1970 | The Wild Country                                  | The Wild Country                                  | Totten, Robert                                      | Robert Totten         | tt0067985 |
| 1746209796 | 1970 | 1970 | The Way We Live Now                               | The Way We Live Now                               | Brown, Barry                                        | Barry Brown           | tt0066551 |
| 1745271911 | 2001 | 2001 | The Body                                          | The Body                                          | McCord, Jonas                                       | Jonas McCord          | tt0201485 |
| 1746234771 | 1972 | 1972 | Doomsday Voyage                                   | Doomsday Voyage                                   | Vidette, John                                       | John Vidette          | tt0068497 |
| 1746420794 | 1994 | 1994 | What Happened Was...                              | What Happened Was...                              | Noonan, Tom                                         | Tom Noonan            | tt0111689 |
| 1746210817 | 1972 | 1972 | Neither By Day Nor By Night                       | Neither by Day Nor by Night                       | Stern, Steven Hilliard                              | Steven Hilliard Stern | tt0068995 |
| 1746218902 | 1974 | 1974 | You and Me                                        | You and Me                                        | Carradine, David                                    | David Carradine       | tt0069524 |
| 1745272391 | 2001 | 2001 | Chain Camera                                      | Chain Camera                                      | Dick, Kirby                                         | Kirby Dick            | tt0272022 |
| 1746219429 | 1976 | 1976 | Mansion of the Doomed                             | Mansion of the Doomed                             | Pataki, Michael                                     | Michael Pataki        | tt0076361 |
| 1746234760 | 1967 | 1967 | Sullivan's Empire                                 | Sullivan's Empire                                 | Hart, Harvey; Carr, Thomas                          | Thomas Carr           | tt0062318 |

|                   |             |             |                                               |                                           |                                                             |                        |                  |
|-------------------|-------------|-------------|-----------------------------------------------|-------------------------------------------|-------------------------------------------------------------|------------------------|------------------|
| 1746410167        | 1986        | 1986        | Knights of the City                           | Knights of the City                       | Orlando, Dominic                                            | Dominic Orlando        | tt0091351        |
| 1745393700        | 2011        | 2010        | Romeo & Juliet in Yiddish                     | Romeo and Juliet in Yiddish               | Annenberg, Eve                                              | Eve Annenberg          | tt1632724        |
| 1746436198        | 1999        | 1999        | An Ideal Husband                              | An Ideal Husband                          | Parker, Oliver                                              | Oliver Parker          | tt0122541        |
| 1745271969        | 2000        | 2000        | Up at the Villa                               | Up at the Villa                           | Haas, Philip                                                | Philip Haas            | tt0153464        |
| 1746410130        | 1987        | 1987        | Checkpoint                                    | Checkpoint                                | Sayyad, Parviz                                              | Parviz Sayyad          | tt0355317        |
| 1746434639        | 1997        | 1996        | Breathing Room                                | Breathing Room                            | Sherman, Jon                                                | Jon Sherman            | tt0115754        |
| 1746434010        | 2000        | 2000        | Achilles' Love                                | Achilles' Love                            | Cole, Meredith                                              |                        | tt0246411        |
| 1746248869        | 1976        | 1976        | The Adventures of Frontier Fremont            | The Adventures of Frontier Fremont        | Friedenberg, Richard                                        | Richard Friedenberg    | tt0071104        |
| 1746422255        | 1996        | 1996        | American Buffalo                              | American Buffalo                          | Corrente, Michael                                           | Michael Corrente       | tt0115530        |
| 1745372594        | 2008        | 2008        | Garden Party                                  | Garden Party                              | Freeland, Jason                                             | Jason Freeland         | tt0828393        |
| 1745374585        | 2008        | 2008        | Transporter 3                                 | Transporter 3                             | Megaton, Olivier                                            | Olivier Megaton        | tt1129442        |
| 1746410654        | 1993        | 1992        | Jack and His Friends                          | Jack and His Friends                      | Ornstein, Bruce                                             | Bruce Ornstein         | tt0104538        |
| 1746393976        | 1992        | 1992        | Fathers & Sons                                | Fathers & Sons                            | Mones, Paul                                                 | Paul Mones             | tt0104240        |
| 1746234830        | 1973        | 1973        | I Could Never Have Sex with Any Man Who Has S | I Could Never Have Sex with Any Man Who H | McCarty, Robert                                             | Robert McCarty         | tt0070204        |
| 1745309192        | 2006        | 2006        | Forgiving Dr. Mengele                         | Forgiving Dr. Mengele                     | Hercules, Bob ; Pugh, Cheri                                 | Bob Hercules           | tt0489707        |
| 1745341187        | 2003        | 2003        | Aileen: Life and Death of a Serial Killer     | Aileen: Life and Death of a Serial Killer | Broomfield, Nick ; Churchill, Joan                          | Nick Broomfield        | tt0364930        |
| 1746393771        | 1988        | 1988        | Bulletproof                                   | Bulletproof                               | Carver, Steve                                               | Steve Carver           | tt0094813        |
| 1745342936        | 2008        | 2008        | Noise                                         | Noise                                     | Bean, Henry                                                 | Frank E. Garcia        | tt2177562        |
| 1745359739        | 2002        | 2002        | Sister Helen                                  | Sister Helen                              | Cammisa, Rebecca ; Fruchtman, Rob                           | Rebecca Cammisa        | tt0303394        |
| 1746394023        | 1986        | 1985        | The Boys Next Door                            | The Boys Next Door                        | Spheeris, Penelope                                          | Penelope Spheeris      | tt0090770        |
| 1746455049        | 1995        | 1995        | Magic in the Water                            | Magic in the Water                        | Stevenson, Rick                                             | Rick Stevenson         | tt0113737        |
| 1746234734        | 1977        | 1977        | Thunder and Lightning                         | Thunder and Lightning                     | Allen, Corey                                                | Corey Allen            | tt0076820        |
| 1745374556        | 2010        | 2010        | Bad Writing                                   | Bad Writing                               | Lott, Vernon                                                | Vernon Lott            | tt1579324        |
| 1746394028        | 1992        | 1992        | A Day at a Time                               | A Day at a Time                           | Garcia, William                                             | William Garcia         | tt0321943        |
| 1745302551        | 2006        | 2006        | Rape of the Soul                              | Rape of the Soul                          | Calace, Michael A.                                          | Michael A. Calace      | tt0808438        |
| 1746422222        | 1995        | 1995        | Liability Crisis                              | Liability Crisis                          | Brody, Richard                                              | Richard Brody          | tt0219129        |
| 1746409679        | 1986        | 1986        | Cuba: In the Shadow of Doubt                  | Cuba: In the Shadow of Doubt              | Burroughs, Jim                                              |                        | tt0486184        |
| 1746198013        | 1970        | 1970        | Other Voices                                  | Other Voices                              | Sawyer, David H.                                            | David H. Sawyer        | tt0064773        |
| 1746421584        | 1989        | 1989        | No Holds Barred                               | No Holds Barred                           | Wright, Thomas J.                                           | Thomas J. Wright       | tt0097987        |
| 1746435921        | 1997        | 1997        | Champions Forever: The Latin Legends          | Champions Forever: The Latin Legends      | Librado, Lee                                                | Lee Librado            | tt0289109        |
| 1746393169        | 1983        | 1983        | The Lords of Discipline                       | The Lords of Discipline                   | Roddam, Franc                                               | Franc Roddam           | tt0085867        |
| 1746394653        | 1989        | 1989        | Who's Harry Crumb?                            | Who's Harry Crumb?                        | Flaherty, Paul                                              | Paul Flaherty          | tt0098645        |
| 1746235284        | 1971        | 1971        | Prism                                         | Prism                                     | Pivnick, Anitra                                             | Anitra Pivnick         | tt0067617        |
| 1745357600        | 2010        | 2010        | Stone                                         | Stoney                                    | Curran, John                                                | Jacob LaMendola        | tt1513919        |
| 1745358088        | 2010        | 2010        | The Killing Jar                               | The Killing Jar                           | Young, Mark                                                 | Mark Young             | tt1270296        |
| 1746508448        | 1924        | 1924        | The Virginian Outcast                         | Virginian Outcast                         | Horne, Robert J.                                            | Robert J. Horner       | tt0015462        |
| 1746508468        | 1924        | 1924        | Never Say Die                                 | Never Say Die                             | Crone, George J.                                            | George Crone           | tt0015170        |
| 1746509004        | 1924        | 1923        | West of the Water Tower                       | West of the Water Tower                   | Sturgeon, Rollin                                            | Rollin S. Sturgeon     | tt0015478        |
| 1746524580        | 1923        | 1923        | Stephen Steps Out                             | Stephen Steps Out                         | Henabery, Joseph                                            | Joseph Henabery        | tt0014510        |
| 1746524175        | 1923        | 1923        | Wild Bill Hickok                              | Wild Bill Hickok                          | Smith, Clifford S.                                          | Clifford Smith         | tt0014615        |
| 1746514794        | 1923        | 1923        | Backbone                                      | Backbone                                  | Sloman, Edward                                              | Edward Sloman          | tt0013855        |
| 1746524563        | 1923        | 1923        | Drifting                                      | Drifting                                  | Browning, Tod                                               | Tod Browning           | tt0014003        |
| 1746524322        | 1923        | 1923        | Success                                       | Success                                   | Ince, Ralph                                                 | Ralph Ince             | tt0014517        |
| 1746524627        | 1923        | 1923        | Jealous Husbands                              | Jealous Husbands                          | Tourneur, Maurice                                           | Maurice Tourneur       | tt0014165        |
| 1746523234        | 1923        | 1923        | Trifling With Honor                           | Trifling with Honor                       | Pollard, Harry A.                                           | Harry A. Pollard       | tt0014561        |
| 1746524401        | 1923        | 1923        | Lost and Found on a South Sea Island          | Lost and Found on a South Sea Island      | Walsh, R. A.                                                | Raoul Walsh            | tt0014213        |
| 1746501648        | 1923        | 1923        | Marriage Morals                               | Marriage Morals                           | Nigh, William                                               | William Nigh           | tt0014260        |
| 1746514480        | 1923        | 1923        | Unblazed Trail                                | The Unblazed Trail                        | Hatton, Richard                                             | Dick Hatton            | tt0175275        |
| <b>1746524057</b> | <b>1923</b> | <b>1923</b> | <b>The Thrill Chaser</b>                      | <b>The Thrill Chaser</b>                  | <b>Sedgwick, Edward</b>                                     | <b>Edward Sedgwick</b> | <b>tt0014543</b> |
| 1746504536        | 1922        | 1922        | Night Life in Hollywood                       | Night Life in Hollywood                   | Caldwell, Fred                                              | Fred Caldwell          | tt0013434        |
| 1746523825        | 1922        | 1922        | The Hottentot                                 | The Hottentot                             | Horne, James W.                                             | James W. Horne         | tt0013251        |
| 1746515604        | 1922        | 1922        | The Top O' the Morning                        | Top o' the Morning                        | Laemmle, Edward                                             | Edward Laemmle         | tt0013694        |
| 1746524182        | 1922        | 1921        | Fool's Paradise                               | Fool's Paradise                           | De Mille, Cecil B.                                          | Cecil B. DeMille       | tt0012181        |
| 1746515071        | 1922        | 1922        | Peacock Alley                                 | Peacock Alley                             | Leonard, Robert Z.                                          | Robert Z. Leonard      | tt0013487        |
| 1746498315        | 1921        | 1921        | The Son of Wallingford                        | The Son of Wallingford                    | Chester, George Randolph; Chester, (George Randolph Chester |                        | tt0012713        |
| 1746515299        | 1921        | 1921        | No Woman Knows                                | No Woman Knows                            | Browning, Tod                                               | Tod Browning           | tt0012505        |
| 1746516287        | 1921        | 1921        | Skinning Skinners                             | Skinning Skinners                         | Nigh, William                                               | William Nigh           | tt0012697        |

|                   |             |             |                                                |                                              |                                        |                                     |                  |
|-------------------|-------------|-------------|------------------------------------------------|----------------------------------------------|----------------------------------------|-------------------------------------|------------------|
| 1746487498        | 1921        | 1921        | Nobody                                         | Nobody                                       | West, Roland                           | Roland West                         | tt0013440        |
| 1746504777        | 1921        | 1921        | The Nut                                        | The Nut                                      | Reed, Theodore                         | Theodore Reed                       | tt0012513        |
| 1746503267        | 1921        | 1921        | The Conquest of Canaan                         | The Conquest of Canaan                       | Neill, R. William                      | Roy William Neill                   | tt0012069        |
| 1746497641        | 1921        | 1921        | Home Talent                                    | Home Talent                                  | Sennett, Mack                          | Mack Sennett                        | tt0012291        |
| 1746516540        | 1920        | 1920        | Pinto                                          | Pinto                                        | Schertzing, Victor                     | Victor Schertzing                   | tt0011576        |
| 1746516625        | 1920        | 1920        | Dinty                                          | Dinty                                        | Neilan, Marshall; McDermott, John      | John McDermott                      | tt0011117        |
| 1746497476        | 1920        | 1920        | The Idol Dancer                                | The Idol Dancer                              | Griffith, D. W.                        | D.W. Griffith                       | tt0011324        |
| 1746504156        | 1920        | 1920        | Even As Eve                                    | Even as Eve                                  | Rolfe, B. A.; De Vonde, Chester        | Chester De Vonde                    | tt0011921        |
| 1746504577        | 1920        | 1920        | The Six Best Cellars                           | The Six Best Cellars                         | Crisp, Donald                          | Donald Crisp                        | tt0011702        |
| 1746486125        | 1920        | 1920        | Don't Ever Marry                               | Don't Ever Marry                             | Neilan, Marshall; Heerman, Victor      | Victor Heerman                      | tt0011121        |
| 1746486451        | 1919        | 1919        | The Boomerang                                  | The Boomerang                                | Bracken, Bertram                       | Bertram Bracken                     | tt0009953        |
| 1746497862        | 1919        | 1919        | The Grim Game                                  | The Grim Game                                | Willat, Irvin                          | Irvin Willat                        | tt0010195        |
| 1746495684        | 1919        | 1919        | The Shepherd of the Hills                      | The Shepherd of the Hills                    | Wright, Harold Bell; Gottschalk, L. F. | Louis F. Gottschalk                 | tt0010690        |
| 1746487748        | 1919        | 1919        | The Mystery of the Yellow Room                 | The Mystery of the Yellow Room               | Chautard, Emile                        | Emile Chautard                      | tt0010499        |
| 1746498672        | 1919        | 1919        | The Right to Happiness                         | The Right to Happiness                       | Holubar, Allen                         | Allen Holubar                       | tt0010630        |
| 1746496060        | 1918        | 1918        | On the Jump                                    | On the Jump                                  | Walsh, Raoul A.                        | Alfred J. Goulding                  | tt0852672        |
| 1746503669        | 1918        | 1918        | All Woman                                      | All Woman                                    | Henley, Hobart                         | Hobart Henley                       | tt0008823        |
| 1746503963        | 1918        | 1918        | A Romance of the Air                           | A Romance of the Air                         | Coates, Franklin B.; Revier, Harry     | Franklin B. Coates                  | tt0009561        |
| 1746485572        | 1918        | 1918        | M'liss                                         | M'Liss                                       | Neilan, Marshall                       | Marshall Neilan                     | tt0009326        |
| 1746485559        | 1918        | 1918        | Friend Husband                                 | Friend Husband                               | Badger, Clarence G.                    | Walter Wright                       | tt0451388        |
| 1746498290        | 1918        | 1918        | The Talk of the Town                           | The Talk of the Town                         | Holubar, Allen                         | Allen Holubar                       | tt0009681        |
| 1746487833        | 1917        | 1917        | The Public Defender                            | Public Defender                              | King, Burton                           | Burton L. King                      | tt0008472        |
| 1746524866        | 1917        | 1917        | Time Locks and Diamonds                        | Time Locks and Diamonds                      | Edwards, Walter                        | Walter Edwards                      | tt0008681        |
| 1746487506        | 1917        | 1917        | The Auction Block                              | The Auction Block                            | Trimble, Larry                         | Laurence Trimble                    | tt0007655        |
| <b>1746503380</b> | <b>1917</b> | <b>1917</b> | <b>The Moth</b>                                | <b>The Moth</b>                              | <b>José, Edward</b>                    | <b>Edward José</b>                  | <b>tt0008321</b> |
| 1746523735        | 1916        | 1916        | Father and Son                                 | Father and Son                               | Hunter, T. Hayes                       | T. Hayes Hunter                     | tt0157620        |
| 1746523859        | 1916        | 1916        | King Lear                                      | King Lear                                    | Warde, Ernest                          | Ernest C. Warde                     | tt0006895        |
| 1746523996        | 1916        | 1916        | Robinson Crusoe                                | Robinson Crusoe                              |                                        | George F. Marion                    | tt0158901        |
| 1746511765        | 1916        | 1916        | The Fall of a Nation                           | The Fall of a Nation                         | Dixon, Thomas                          | Thomas Dixon Jr.                    | tt0006664        |
| 1746515022        | 1915        | 1915        | Barbara Frietchie                              | Barbara Frietchie                            | Blaché, Herbert                        | Herbert Blaché                      | tt0004937        |
| 1746502585        | 1915        | 1915        | A Gentleman of Leisure                         | A Gentleman of Leisure                       | Melford, George                        | George Melford                      | tt0005378        |
| 1746533170        | 1915        | 1915        | The Rights of Man: a Story of War's Red Blotch | The Rights of Man: A Story of War's Red Blot | Pratt, John H.                         | Jack Pratt                          | tt0005969        |
| 1746524709        | 1915        | 1916        | The Brink                                      | The Rink                                     | Swickard, Charles                      | Charles Chaplin                     | tt0007264        |
| 1746514913        | 1914        | 1914        | The Great Diamond Robbery                      | The Great Diamond Robbery                    | Morange, Edward A.                     | Edward A. Morange                   | tt0004037        |
| 1746524713        | 1914        | 1914        | The Man from Home                              | The Man from Home                            | DeMille, Cecil B.                      | Cecil B. DeMille                    | tt0004294        |
| 1746514356        | 1913        | 1913        | Sally Scraggs, Housemaid                       | Sally Scraggs: Housemaid                     |                                        | Robert Z. Leonard                   | tt0334285        |
| 1769969927        | 1912        | 1912        | Driftwood                                      | Driftwood                                    |                                        | Allan Dwan                          | tt0442180        |
| 1769970717        | 1912        | 1912        | Parson James                                   | Parson James                                 |                                        | Francis J. Grandon                  | tt0358628        |
| 1769970221        | 1912        | 1912        | Little Hands                                   | Little Hands                                 |                                        | Étienne Arnaud                      | tt0358567        |
| 1769970052        | 1912        | 1912        | The Trail of Gold                              | The Trail of Gold                            |                                        | Pat Hartigan                        | tt0196169        |
| 1769970720        | 1912        | 1912        | The Family Next Door                           | The Family Next Door                         | Fielding, Romaine                      | Romaine Fielding                    | tt0358470        |
| 1769969698        | 1912        | 1911        | The Lover's Signal                             | The Lover's Signal                           |                                        | Joseph W. Smiley                    | tt0358574        |
| 1769969914        | 1912        | 1912        | For Professional Services                      | For Professional Services                    |                                        | C.J. Williams                       | tt0451338        |
| 1769970019        | 1912        | 1911        | The Cattle King's Daughter                     | The Cattle King's Daughter                   | Anderson, G. M.                        | Gilbert M. 'Broncho Billy' Anderson | tt0375642        |
| 1769969880        | 1911        | 1911        | Mutt and Jeff and the Unlucky Star             | Mutt and Jeff and the Unlucky Star           |                                        |                                     | tt1302016        |
| 1769969951        | 1911        | 1911        | The Law of the Range                           | The Law of the Range                         | Fahrney, Milton J.                     | Milton J. Fahrney                   | tt0001729        |
| 1769969410        | 1911        | 1911        | A Breach of Faith                              | A Breach of Faith                            | Smalley, Phillips; Weber, Lois         | Phillips Smalley                    | tt0248715        |
| 1769969518        | 1911        | 1911        | Mutt and Jeff's Scheme That Failed             | Mutt and Jeff's Scheme That Failed           |                                        |                                     | tt1303881        |
| 1769969955        | 1911        | 1911        | The Martyr                                     | The Martyr                                   | Smalley, Phillips; Weber, Lois         | Phillips Smalley                    | tt0248983        |
| 1769969923        | 1911        | 1911        | The Wife's Awakening                           | The Wife's Awakening                         |                                        | Harry Solter                        | tt0201332        |
| 1769970004        | 1911        | 1911        | The Girl and the Half-Back                     | The Girl and the Half-Back                   |                                        |                                     | tt0256777        |
| 1769970784        | 1911        | 1911        | The Tempest                                    | The Tempest                                  |                                        | Edwin Thanouser                     | tt0125542        |
| 1769969694        | 1911        | 1911        | Uncle's Visit                                  | Uncle's Visit                                | Ince, Thomas H.                        | Thomas H. Ince                      | tt0358745        |
| 1769969554        | 1911        | 1911        | The Miner's Wife                               | The Miner's Wife                             |                                        | Allan Dwan                          | tt1192073        |
| 1769969922        | 1911        | 1911        | Executive Clemency                             | Executive Clemency                           |                                        |                                     | tt0359241        |
| 1769970005        | 1911        | 1911        | Bonita of El Cajon                             | Bonita of El Cajon                           |                                        | Allan Dwan                          | tt0419547        |
| 1769970007        | 1911        | 1911        | The Stronger Man                               | The Stronger Man                             |                                        | Allan Dwan                          | tt1298804        |

|            |      |      |                                         |                                         |                   |                                     |           |
|------------|------|------|-----------------------------------------|-----------------------------------------|-------------------|-------------------------------------|-----------|
| 1746184709 | 1910 | 1910 | Adventures of a Cowpuncher              | The Adventures of a Cowpuncher          |                   | Fred J. Balshofer                   | tt0358348 |
| 1746502220 | 1910 | 1910 | Love and the Law                        | Love and the Law                        |                   | Edwin S. Porter                     | tt1507324 |
| 1746571092 | 1910 | 1910 | The Cowboy and the School Marm          | The Cowboy and the Schoolmarm           |                   | Fred J. Balshofer                   | tt0359107 |
| 1746523483 | 1910 | 1910 | The Miser's Daughter                    | The Miser's Daughter                    |                   | Harry Solter                        | tt0200868 |
| 1746571664 | 1910 | 1910 | A Flash of Light                        | A Flash of Light                        | Griffith, D. W.   | D.W. Griffith                       | tt0001217 |
| 1746182749 | 1910 | 1910 | Bradford's Claim                        | Bradford's Claim                        |                   | Edwin S. Porter                     | tt0330090 |
| 1746573631 | 1910 | 1910 | Coquette's Suitors                      | The Coquette's Suitors                  |                   | Harry Solter                        | tt0361472 |
| 1746523321 | 1910 | 1910 | The Vampire                             | The Vampire                             |                   |                                     | tt0001441 |
| 1746501018 | 1910 | 1910 | Over the Wire                           | Over the Wire                           |                   |                                     | tt1786618 |
| 1746514664 | 1910 | 1910 | The Squaw and the Man                   | The Squaw and the Man                   |                   | Frank Beal                          | tt1161832 |
| 1746500750 | 1910 | 1910 | The Ten of Spades; or, A Western Raffle | The Ten of Spades; or, A Western Raffle |                   | Fred J. Balshofer                   | tt0358727 |
| 1746183306 | 1910 | 1910 | The Attack on the Mill                  | The Attack on the Mill                  |                   | Edwin S. Porter                     | tt1511468 |
| 1746183672 | 1910 | 1910 | Carminella                              | Carminella                              |                   | Bannister Merwin                    | tt0001146 |
| 1746581075 | 1910 | 1910 | In the Mission Shadows                  | In the Mission Shadows                  |                   | Gaston Méliès                       | tt0001267 |
| 1746581936 | 1910 | 1910 | Jean and the Waif                       | Jean and the Waif                       |                   | Laurence Trimble                    | tt0338154 |
| 1746580946 | 1910 | 1910 | Hank and Lank: Life Savers              | Hank and Lank: Lifesavers               |                   | Gilbert M. 'Broncho Billy' Anderson | tt0206798 |
| 1746493630 | 1910 | 1910 | A Plucky American Girl                  | A Plucky American Girl                  |                   | Gaston Méliès                       | tt0822846 |
| 1746524203 | 1910 | 1910 | The Miner's Sweetheart                  | The Miner's Sweetheart                  |                   |                                     | tt0348676 |
| 1746523858 | 1910 | 1910 | The Motor Fiend                         | The Motor Fiend                         |                   | Theodore Wharton                    | tt0284322 |
| 1746572197 | 1910 | 1910 | Curing a Masher                         | Curing a Masher                         |                   | Gilbert M. 'Broncho Billy' Anderson | tt0372223 |
| 1746581186 | 1910 | 1910 | A Gambler's End                         | A Gambler's End                         |                   | Theodore Wharton                    | tt0197507 |
| 1746581261 | 1910 | 1911 | He Who Laughs Last                      | He Who Laughs Last                      |                   | Pat Hartigan                        | tt0403101 |
| 1746581178 | 1910 | 1910 | The Indian and the Cowgirl              | The Indian and the Cowgirl              |                   | Fred J. Balshofer                   | tt0359465 |
| 1746532459 | 1910 | 1910 | Pals                                    | Pals                                    |                   | William F. Haddock                  | tt0362005 |
| 1746581371 | 1910 | 1910 | An Indian Maiden's Choice               | An Indian Maiden's Choice               |                   | Fred J. Balshofer                   | tt1380121 |
| 1746581785 | 1910 | 1910 | An Indian's Gratitude                   | An Indian's Gratitude                   |                   | James Young Deer                    | tt1225664 |
| 1746501001 | 1910 | 1910 | A Ranchman's Simple Son                 | A Ranchman's Simple Son                 |                   | Fred J. Balshofer                   | tt0359877 |
| 1746523564 | 1910 | 1910 | The Time-Lock Safe                      | The Time Lock Safe                      |                   | Harry Solter                        | tt0274970 |
| 1746500935 | 1910 | 1910 | The Masquerade Cop                      | The Masquerade Cop                      |                   | Gilbert M. 'Broncho Billy' Anderson | tt0372407 |
| 1746182718 | 1910 | 1910 | A Cheyenne's Love for a Sioux           | A Cheyenne's Love for a Sioux           |                   | Fred J. Balshofer                   | tt1389327 |
| 1746571201 | 1910 | 1910 | A Child of the Ghetto                   | A Child of the Ghetto                   | Griffith, D. W.   | D.W. Griffith                       | tt0001150 |
| 1746184352 | 1910 | 1910 | Bear Ye One Another's Burdens           | Bear Ye One Another's Burdens           |                   | Harry Solter                        | tt0200470 |
| 1746514089 | 1910 | 1910 | The Widow                               | The Widow                               |                   | Harry Solter                        | tt0201331 |
| 1746501301 | 1910 | 1910 | Two Men                                 | Two Men                                 |                   | Harry Solter                        | tt0201279 |
| 1746581516 | 1910 | 1910 | Jane and the Stranger                   | Jane and the Stranger                   |                   | Harry Solter                        | tt0200747 |
| 1746573004 | 1910 | 1910 | Convict No. 796                         | Convict No. 796                         | Brooke, Van Dyke  | Van Dyke Brooke                     | tt0221091 |
| 1746503060 | 1910 | 1910 | A Rough Night on the Bridge             | A Rough Night on the Bridge             |                   | Gaston Méliès                       | tt0001126 |
| 1746581767 | 1910 | 1910 | His Second Wife                         | His Second Wife                         |                   | Harry Solter                        | tt0200704 |
| 1746512602 | 1910 | 1910 | The Stranded Actor                      | The Stranded Actor                      |                   | William F. Haddock                  | tt2236914 |
| 1746572277 | 1910 | 1910 | For Her Sister's Sake                   | For Her Sister's Sake                   |                   | Edwin S. Porter                     | tt0001221 |
| 1746501755 | 1910 | 1910 | Looking Forward                         | Looking Forward                         |                   | Theodore Marston                    | tt0312920 |
| 1746501262 | 1910 | 1910 | The Maid of Niagara                     | The Maid of Niagara                     |                   | Theodore Wharton                    | tt0001302 |
| 1746576488 | 1910 | 1910 | Davy Crockett                           | Davy Crockett                           |                   | Francis Boggs                       | tt0001177 |
| 1746575678 | 1910 | 1910 | The Cowboys and the Bachelor Girls      | The Cowboys and the Bachelor Girls      |                   | William F. Haddock                  | tt1084674 |
| 1746410637 | 1988 | 1988 | Dead Heat                               | Dead Heat                               | Goldblatt, Mark   | Mark Goldblatt                      | tt0094961 |
| 1746420248 | 1988 | 1988 | Zelly and Me                            | Zelly and Me                            | Rathborne, Tina   | Tina Rathborne                      | tt0096501 |
| 1746421059 | 1987 | 1987 | Benji the Hunted                        | Benji the Hunted                        | Camp, Joe         | Joe Camp                            | tt0092638 |
| 1746409967 | 1987 | 1987 | China Girl                              | China Girl                              | Ferrara, Abel     | Abel Ferrara                        | tt0092751 |
| 1746410607 | 1987 | 1987 | Mannequin                               | Mannequin                               | Gottlieb, Michael | Michael Gottlieb                    | tt0093493 |
| 1746408833 | 1987 | 1987 | Date With an Angel                      | Date with an Angel                      | McLoughlin, Tom   | Tom McLoughlin                      | tt0092834 |
| 1746409962 | 1987 | 1987 | Less Than Zero                          | Less Than Zero                          | Kanievska, Marek  | Marek Kanievska                     | tt0093407 |
| 1746409729 | 1987 | 1987 | The Rosary Murders                      | The Rosary Murders                      | Walton, Fred      | Fred Walton                         | tt0093881 |
| 1746394697 | 1986 | 1987 | Athens, Ga. -- Inside/Out               | Athens, Ga. Inside/Out                  | Gayton, Tony      | Tony Gayton                         | tt0092591 |
| 1746408449 | 1986 | 1986 | Short Circuit                           | Short Circuit                           | Badham, John      | John Badham                         | tt0091949 |
| 1746409354 | 1984 | 1984 | Making the Grade                        | Making the Grade                        | Walker, Dorian    | Dorian Walker                       | tt0087666 |
| 1746408854 | 1982 | 1982 | Liar's Moon                             | Liar's Moon                             | Fisher, David     | David Fisher                        | tt0082656 |
| 1769977805 | 1981 | 1981 | Ghost Story                             | Ghost Story                             | Irvin, John       | John Irvin                          | tt0082449 |



|            |      |      |                                                               |                                                                |                             |                       |            |
|------------|------|------|---------------------------------------------------------------|----------------------------------------------------------------|-----------------------------|-----------------------|------------|
| 1746235238 | 1980 | 1979 | Over the Edge                                                 | Over the Edge                                                  | Kaplan, Jonathan            | Jonathan Kaplan       | tt0079688  |
| 1746256826 | 1980 | 1979 | Don't Go in the House                                         | Don't Go in the House                                          | Ellison, Joseph             | Joseph Ellison        | tt0080646  |
| 1746250201 | 1980 | 1980 | The Stunt Man                                                 | The Stunt Man                                                  | Rush, Richard               | Richard Rush          | tt0081568  |
| 1746235725 | 1980 | 1980 | Battle Beyond the Stars                                       | Battle Beyond the Stars                                        | Murakami, Jimmy T.          | Jimmy T. Murakami     | tt0080421  |
| 1746219573 | 1980 | 1980 | The Fiendish Plot of Dr. Fu Manchu                            | The Fiendish Plot of Dr. Fu Manchu                             | Haggard, Piers              | Piers Haggard         | tt0080731  |
| 1746269770 | 1979 | 1979 | Take Down                                                     | Take Down                                                      | Merrill, Kieth              | Kieth Merrill         | tt0078358  |
| 1746235249 | 1978 | 1978 | Hot Lead and Cold Feet                                        | Hot Lead and Cold Feet                                         | Butler, Robert              | Robert Butler         | tt0077698  |
| 1746235652 | 1977 | 1977 | Semi-Tough                                                    | Semi Tough                                                     | Ritchie, Michael            | Michael Ritchie       | tt0078227  |
| 1746251360 | 1976 | 1976 | King Kong                                                     | King Kong                                                      | Guillermin, John            | John Guillermin       | tt0074751  |
| 1746257668 | 1976 | 1976 | The Blue Bird                                                 | The Blue Bird                                                  | Cukor, George               | George Cukor          | tt0074225  |
| 1746256247 | 1976 | 1976 | Buffalo Bill and the Indians or Sitting Bull's History Lesson | Buffalo Bill and the Indians, or Sitting Bull's History Lesson | Altman, Robert              | Robert Altman         | tt0074254  |
| 1746235640 | 1975 | 1975 | The Wind and the Lion                                         | The Wind and the Lion                                          | Milius, John                | John Milius           | tt0073906  |
| 1746257990 | 1975 | 1975 | Hard Times                                                    | Hard Times                                                     | Hill, Walter                | Walter Hill           | tt0073092  |
| 1746235926 | 1974 | 1974 | California Split                                              | California Split                                               | Altman, Robert              | Robert Altman         | tt0071269  |
| 1746235224 | 1973 | 1973 | The Clones                                                    | The Clones                                                     | Hunt, Paul; Card, Lamar     | Lamar Card            | tt0071336  |
| 1745358057 | 2009 | 2009 | Black Dynamite                                                | Black Dynamite                                                 | Sanders, Scott              | Scott Sanders         | tt1190536  |
| 1745359831 | 2009 | 2009 | Bad Lieutenant: Port of Call New Orleans                      | Bad Lieutenant: Port of Call New Orleans                       | Herzog, Werner              | Werner Herzog         | tt11095217 |
| 1745372329 | 2008 | 2008 | Lake City                                                     | Lake City                                                      | Hill, Hunter ; Moore, Perry | Hunter Hill           | tt0875705  |
| 1745342858 | 2008 | 2008 | Frozen River                                                  | Frozen River                                                   | Hunt, Courtney              | Courtney Hunt         | tt0978759  |
| 1745374600 | 2008 | 2008 | 21                                                            | 21                                                             | Luketic, Robert             | Robert Luketic        | tt0478087  |
| 1745358067 | 2008 | 2008 | Stuck                                                         | Stuck                                                          | Gordon, Stuart              | Mike Rose             | tt1280714  |
| 1745374753 | 2008 | 2008 | Mamma Mia!                                                    | Mamma Mia!                                                     | Lloyd, Phyllida             | Phyllida Lloyd        | tt0795421  |
| 1745303017 | 2007 | 2007 | Moving McAllister                                             | Moving McAllister                                              | Black, Andrew               | Andrew Black          | tt0444672  |
| 1745322659 | 2007 | 2007 | Sicko                                                         | Sicko                                                          | Moore, Michael              | Michael Moore         | tt0386032  |
| 1745293240 | 2006 | 2006 | How to Eat Fried Worms                                        | How to Eat Fried Worms                                         | Dolman, Bob                 | Bob Dolman            | tt0462346  |
| 1745293672 | 2006 | 2006 | The Texas Chainsaw Massacre: The Beginning                    | The Texas Chainsaw Massacre: The Beginning                     | Liebman, Jonathan           | Jonathan Liebman      | tt0420294  |
| 1745302380 | 2006 | 2006 | The Heart of the Game                                         | The Heart of the Game                                          | Serrill, Ward               | Gabriel de Urioste    | tt1537306  |
| 1745293575 | 2006 | 2006 | The Quiet                                                     | The Quiet                                                      | Babbitt, Jamie              | Marshall McAuley      | tt0874998  |
| 1745293521 | 2005 | 2005 | Pride & Prejudice                                             | Pride & Prejudice                                              | Wright, Joe                 | Joe Wright            | tt0414387  |
| 1745309603 | 2005 | 2005 | Land of the Dead                                              | Land of the Dead                                               | Romero, George A.           | George A. Romero      | tt0418819  |
| 1745302628 | 2005 | 2005 | White Noise                                                   | White Noise                                                    | Sax, Geoffrey               | Geoffrey Sax          | tt0375210  |
| 1745342683 | 2004 | 2004 | Confessions of a Teenage Drama Queen                          | Confessions of a Teenage Drama Queen                           | Sugarman, Sara              | Sara Sugarman         | tt0361467  |
| 1745357903 | 2004 | 2004 | Pride & Prejudice                                             | Bride & Prejudice                                              | Black, Andrew               | Gurinder Chadha       | tt0361411  |
| 1745340050 | 2004 | 2004 | Van Helsing                                                   | Van Helsing                                                    | Sommers, Stephen            | Stephen Sommers       | tt0338526  |
| 1745339870 | 2003 | 2003 | The Human Stain                                               | The Human Stain                                                | Benton, Robert              | Robert Benton         | tt0308383  |
| 1745341614 | 2002 | 2002 | Waking Up in Reno                                             | Waking Up in Reno                                              | Brady, Jordan               | Jordan Brady          | tt0219400  |
| 1745374309 | 2002 | 2002 | Winning Girls Through Psychic Mind Control                    | Winning Girls Through Psychic Mind Control                     | Brown, Barry Alexander      | Barry Alexander Brown | tt0326412  |
| 1745372581 | 2002 | 2002 | Zig Zag                                                       | Zig Zag                                                        | Goyer, David S.             | David S. Goyer        | tt0271885  |
| 1745342765 | 2002 | 2002 | Possession                                                    | Possession                                                     | LaBute, Neil                | Neil LaBute           | tt0256276  |
| 1745342471 | 2002 | 2002 | XXX                                                           | They                                                           | Cohen, Rob                  | Robert Harmon         | tt0283632  |
| 1745373495 | 2001 | 2001 | Life As a House                                               | Life as a House                                                | Winkler, Irwin              | Irwin Winkler         | tt0264796  |
| 1746581056 | 1951 | 1951 | Santa Fe                                                      | Santa Fe                                                       | Pichel, Irving              | Irving Pichel         | tt0043992  |
| 1746563647 | 1951 | 1951 | The Well                                                      | The Well                                                       | Popkin, Leo; Rouse, Russell | Leo C. Popkin         | tt0044202  |
| 1746577329 | 1950 | 1950 | Three Little Words                                            | Three Little Words                                             | Thorpe, Richard             | Richard Thorpe        | tt0043044  |
| 1746520883 | 1950 | 1950 | The Big Lift                                                  | The Big Lift                                                   | Seaton, George              | George Seaton         | tt0042249  |
| 1746530734 | 1950 | 1950 | The File on Thelma Jordon                                     | The File on Thelma Jordon                                      | Siodmak, Robert             | Robert Siodmak        | tt0041368  |
| 1746542628 | 1949 | 1949 | Fighting Man of the Plains                                    | Fighting Man of the Plains                                     | Marin, Edwin L.             | Edwin L. Marin        | tt0041362  |
| 1746520946 | 1949 | 1949 | The Barkleys of Broadway                                      | The Barkleys of Broadway                                       | Walters, Charles            | Charles Walters       | tt0041158  |
| 1746509481 | 1949 | 1949 | Chicago Deadline                                              | Chicago Deadline                                               | Allen, Lewis                | Lewis Allen           | tt0041243  |
| 1746507838 | 1949 | 1949 | Black Magic                                                   | Black Magic                                                    | Ratoff, Gregory             | Gregory Ratoff        | tt0041182  |
| 1746491897 | 1948 | 1948 | Guns of Hate                                                  | Guns of Hate                                                   | Selander, Lesley            | Lesley Selander       | tt0040411  |
| 1746492371 | 1948 | 1948 | Grand Canyon Trail                                            | Grand Canyon Trail                                             | Witney, William             | William Witney        | tt0040399  |
| 1746491833 | 1948 | 1948 | Inner Sanctum                                                 | Inner Sanctum                                                  | Landers, Lew                | Lew Landers           | tt0040472  |
| 1746492553 | 1948 | 1948 | The Arizona Ranger                                            | The Arizona Ranger                                             | Rawlins, John               | John Rawlins          | tt0040113  |
| 1746499928 | 1948 | 1948 | Arthur Takes Over                                             | Arthur Takes Over                                              | St. Clair, Mal              | Malcolm St. Clair     | tt0040118  |
| 1746474118 | 1947 | 1947 | Code of the Saddle                                            | Code of the Saddle                                             | Carr, Thomas                | Thomas Carr           | tt0039270  |
| 1746465121 | 1947 | 1947 | Untamed Fury                                                  | Untamed Fury                                                   | Scott, Ewing                | Ewing Scott           | tt0039942  |

|            |      |      |                             |                             |                       |                      |           |
|------------|------|------|-----------------------------|-----------------------------|-----------------------|----------------------|-----------|
| 1746475970 | 1947 | 1947 | Born to Speed               | Born to Speed               | Cahn, Edward L.       | Edward L. Cahn       | tt0039212 |
| 1746492435 | 1947 | 1947 | Scared to Death             | Scared to Death             | Cabanne, Christy      | Christy Cabanne      | tt0039800 |
| 1746475287 | 1947 | 1947 | For the Love of Rusty       | For the Love of Rusty       | Sturges, John         | John Sturges         | tt0039390 |
| 1746491786 | 1947 | 1947 | Riding the California Trail | Riding the California Trail | Nigh, William         | William Nigh         | tt0039771 |
| 1746474449 | 1947 | 1947 | Prairie Raiders             | Prairie Raiders             | Abrahams, Derwin      | Derwin Abrahams      | tt0039728 |
| 1746474393 | 1947 | 1947 | Nora Prentiss               | Nora Prentiss               | Sherman, Vincent      | Vincent Sherman      | tt0039666 |
| 1746499861 | 1947 | 1947 | The Marauders               | The Marauders               | Archainbaud, George   | George Archainbaud   | tt0039607 |
| 1746492745 | 1946 | 1946 | The Invisible Informer      | The Invisible Informer      | Ford, Philip          | Philip Ford          | tt0038644 |
| 1746491709 | 1946 | 1947 | Stairway for a Star         | Stairway for a Star         |                       | Jack Rieger          | tt0039864 |
| 1746499931 | 1946 | 1946 | Trigger Fingers             | Trigger Fingers             | Hillyer, Lambert      | Lambert Hillyer      | tt0039048 |
| 1746474446 | 1946 | 1946 | Betty Co-ed                 | Betty Co Ed                 | Dreifuss, Arthur      | Arthur Dreifuss      | tt0038352 |
| 1746465006 | 1946 | 1946 | Heading West                | Heading West                | Nazarro, Ray          | Ray Nazarro          | tt0038623 |
| 1746464864 | 1946 | 1946 | Strangler of the Swamp      | Strangler of the Swamp      | Wisbar, Frank         | Frank Wisbar         | tt0038129 |
| 1746491986 | 1946 | 1946 | The Virginian               | The Virginian               | Gilmore, Stuart       | Stuart Gilmore       | tt0039082 |
| 1746465253 | 1945 | 1945 | She Gets Her Man            | She Gets Her Man            | Kenton, Erle C.       | Erle C. Kenton       | tt0038082 |
| 1746454089 | 1945 | 1945 | Flame of Barbary Coast      | Flame of Barbary Coast      | Kane, Joseph          | Joseph Kane          | tt0037702 |
| 1746491979 | 1945 | 1945 | Isle of the Dead            | Isle of the Dead            | Robson, Mark          | Mark Robson          | tt0037820 |
| 1746439472 | 1944 | 1944 | Step Lively                 | Step Lively                 | Whelan, Tim           | Tim Whelan           | tt0037313 |
| 1746437854 | 1944 | 1944 | Gangsters of the Frontier   | Gangsters of the Frontier   | Clifton, Elmer        | Elmer Clifton        | tt0036847 |
| 1746465361 | 1944 | 1944 | The Laramie Trail           | The Laramie Trail           | English, John         | John English         | tt0037005 |
| 1746454263 | 1944 | 1944 | Sensations of 1945          | Sensations of 1945          | Stone, Andrew         | Andrew L. Stone      | tt0037258 |
| 1746454375 | 1944 | 1944 | None But the Lonely Heart   | None But the Lonely Heart   | Odets, Clifford       | Clifford Odets       | tt0037135 |
| 1746424410 | 1943 | 1943 | Jack London                 | Jack London                 | Santell, Alfred       | Alfred Santell       | tt0036051 |
| 1746454032 | 1943 | 1943 | Bomber's Moon               | Bomber's Moon               | Fuhr, Charles         | Edward Ludwig        | tt0035690 |
| 1746454391 | 1943 | 1943 | Silver City Raiders         | Silver City Raiders         | Berke, William        | William Berke        | tt0036355 |
| 1746437839 | 1943 | 1943 | It Ain't Hay                | It Ain't Hay                | Kenton, Erle C.       | Erle C. Kenton       | tt0036047 |
| 1746464983 | 1942 | 1942 | Smith of Minnesota          | Smith of Minnesota          | Landers, Lew          | Lew Landers          | tt0035346 |
| 1746436030 | 1942 | 1942 | Friendly Enemies            | Friendly Enemies            | Dwan, Allan           | Allan Dwan           | tt0034757 |
| 1746453842 | 1942 | 1942 | Tales of Manhattan          | Tales of Manhattan          | Duvivier, Julien      | Julien Duvivier      | tt0035415 |
| 1746585348 | 1929 | 1929 | South Sea Rose              | South Sea Rose              | Dwan, Allan           | Allan Dwan           | tt0020437 |
| 1746581561 | 1929 | 1929 | The Shakedown               | The Shakedown               | Wylar, William        | William Wylar        | tt0020392 |
| 1746584856 | 1929 | 1929 | Two Weeks Off               | Two Weeks Off               | Beaudine, William     | William Beaudine     | tt0020527 |
| 1746584747 | 1928 | 1928 | The Wind                    | The Wind                    | Seastrom, Victor      | Victor Sjöström      | tt0019585 |
| 1746585191 | 1928 | 1928 | Won in the Clouds           | Won in the Clouds           | Mitchell, Bruce       | Bruce Mitchell       | tt0019596 |
| 1746581986 | 1928 | 1928 | The Terror                  | The Terror                  | Del Ruth, Roy         | Roy Del Ruth         | tt0019456 |
| 1746582290 | 1928 | 1928 | Anybody Here Seen Kelly?    | Anybody Here Seen Kelly?    | Wylar, William        | William Wylar        | tt0018647 |
| 1746581574 | 1928 | 1928 | Show Folks                  | Show Folks                  | Stein, Paul L.        | Paul L. Stein        | tt0019377 |
| 1746584596 | 1928 | 1928 | The Code of the Scarlet     | The Code of the Scarlet     | Brown, Harry J.       | Harry Joe Brown      | tt0018781 |
| 1746583694 | 1928 | 1928 | Clothes Make the Woman      | Clothes Make the Woman      | Terriss, Tom          | Tom Terriss          | tt0018778 |
| 1746584766 | 1928 | 1928 | Good Morning, Judge         | Good Morning, Judge         | Seiter, William A.    | William A. Seiter    | tt0018950 |
| 1746585222 | 1928 | 1927 | The Enemy                   | The Enemy                   | Niblo, Fred           | Fred Niblo           | tt0017850 |
| 1746514130 | 1927 | 1927 | The Princess from Hoboken   | The Princess from Hoboken   | Dale, Allan           | Allen Dale           | tt0018285 |
| 1746512860 | 1927 | 1927 | The Garden of Allah         | The Garden of Allah         | Ingram, Rex           | Rex Ingram           | tt0017917 |
| 1746513812 | 1927 | 1927 | Backstage                   | Backstage                   | Stone, Phil           | Phil Goldstone       | tt0017657 |
| 1746507873 | 1927 | 1927 | Mockery                     | Mockery                     | Christensen, Benjamin | Benjamin Christensen | tt0018166 |
| 1746513833 | 1927 | 1927 | The Fourth Commandment      | The Fourth Commandment      | Johnson, Emory        | Emory Johnson        | tt0016904 |
| 1746533190 | 1927 | 1927 | The Chinese Parrot          | The Chinese Parrot          | Leni, Paul            | Paul Leni            | tt0017752 |
| 1746524523 | 1927 | 1927 | The Cradle Snatchers        | The Cradle Snatchers        | Hawks, Howard         | Howard Hawks         | tt0017778 |
| 1746508140 | 1926 | 1926 | The Desperate Game          | The Desperate Game          | Franz, Joseph         | Joseph Franz         | tt0016778 |
| 1746508425 | 1926 | 1926 | Kid Boots                   | Kid Boots                   | Tuttle, Frank         | Frank Tuttle         | tt0017028 |
| 1746508926 | 1926 | 1926 | Whispering Smith            | Whispering Smith            | Melford, George       | George Melford       | tt0017550 |
| 1746509433 | 1926 | 1926 | Tony Runs Wild              | Tony Runs Wild              | Buckingham, Thomas    | Tom Buckingham       | tt0017477 |
| 1746507917 | 1926 | 1926 | Blind Trail                 | The Blind Trail             | Maloney, Leo          | Leo D. Maloney       | tt0016659 |
| 1746508421 | 1926 | 1926 | Rolling Home                | Rolling Home                | Seiter, William A.    | William A. Seiter    | tt0017334 |
| 1746500234 | 1926 | 1926 | Chasing Trouble             | Chasing Trouble             | Morante, Milburn      | Milburn Morante      | tt0016719 |
| 1746520744 | 1925 | 1925 | The Plastic Age             | The Plastic Age             | Ruggles, Wesley       | Wesley Ruggles       | tt0016226 |
| 1746509008 | 1925 | 1925 | A Western Engagement        | A Western Engagement        | Hurst, Paul           | Paul Hurst           | tt0177382 |

|                   |             |             |                                |                                |                                |                       |                  |
|-------------------|-------------|-------------|--------------------------------|--------------------------------|--------------------------------|-----------------------|------------------|
| 1746520872        | 1925        | 1925        | The Coast of Folly             | The Coast of Folly             | Dwan, Allan                    | Allan Dwan            | tt0015692        |
| 1746520705        | 1925        | 1925        | The Tower of Lies              | The Tower of Lies              | Seastrom, Victor               | Victor Sjöström       | tt0016446        |
| 1746500232        | 1925        | 1925        | The Lady Who Lied              | The Lady Who Lied              | Carewe, Edwin                  | Edwin Carewe          | tt0016003        |
| 1746520221        | 1925        | 1925        | The Only Thing                 | The Only Thing                 | Conway, Jack                   | Jack Conway           | tt0016184        |
| 1746508227        | 1925        | 1925        | Raffles, the Amateur Cracksman | Raffles: The Amateur Cracksman | Baggot, King                   | King Baggot           | tt0015569        |
| 1746520859        | 1925        | 1925        | Percy                          | Percy                          | Neill, R. William              | Roy William Neill     | tt0016211        |
| 1746520161        | 1925        | 1925        | Manhattan Madness              | Manhattan Madness              | John McDermott                 | John McDermott        | tt0016086        |
| 1746520380        | 1924        | 1924        | The Fast Worker                | The Fast Worker                | Seiter, William                | William A. Seiter     | tt0014877        |
| 1746465083        | 1942        | 1942        | West of Tombstone              | West of Tombstone              | Bretherton, Howard             | Howard Bretherton     | tt0035542        |
| 1746454658        | 1942        | 1942        | A Tragedy at Midnight          | A Tragedy at Midnight          | Santley, Joseph                | Joseph Santley        | tt0035463        |
| 1746454488        | 1942        | 1942        | Cat People                     | Cat People                     | Tourneur, Jacques              | Jacques Tourneur      | tt0034587        |
| 1746454290        | 1942        | 1942        | Scattergood Rides High         | Scattergood Rides High         | Cabanne, Christy               | Christy Cabanne       | tt0035292        |
| 1746465355        | 1942        | 1942        | The Power of God               | The Power of God               | MacFadden, Hamilton            | Hamilton MacFadden    | tt4487016        |
| 1746424447        | 1942        | 1942        | Riding Through Nevada          | Riding Through Nevada          | Berke, William                 | William Berke         | tt0197824        |
| 1746424051        | 1941        | 1941        | Bedtime Story                  | Bedtime Story                  | Hall, Alexander                | Alexander Hall        | tt0033382        |
| 1746464945        | 1941        | 1941        | The Blood of Jesus             | The Blood of Jesus             | Williams, Spencer              | Spencer Williams      | tt0033406        |
| 1746438943        | 1941        | 1941        | Naval Academy                  | Naval Academy                  | Kenton, Erle C.                | Erle C. Kenton        | tt0033940        |
| 1746436131        | 1941        | 1941        | Dance Hall                     | Dance Hall                     | Pichel, Irving                 | Irving Pichel         | tt0033507        |
| 1746424403        | 1941        | 1941        | Kiss the Boys Goodbye          | Kiss the Boys Goodbye          | Schertzinger, Victor           | Victor Schertzinger   | tt0033791        |
| 1746454612        | 1941        | 1941        | Knockout                       | Knockout                       | Clemens, William               | William Clemens       | tt0033795        |
| 1746583990        | 1940        | 1940        | When the Daltons Rode          | When the Daltons Rode          | Marshall, George               | George Marshall       | tt0033254        |
| 1746418939        | 1940        | 1940        | The Golden Fleecing            | The Golden Fleecing            | Fenton, Leslie                 | Leslie Fenton         | tt0033145        |
| 1746436648        | 1940        | 1940        | Pinto Canyon                   | Pinto Canyon                   | Johnson, Raymond K.            | Bernard B. Ray        | tt0032911        |
| 1746453473        | 1940        | 1940        | Argentine Nights               | Argentine Nights               | Rogell, Albert S.              | Albert S. Rogell      | tt0032218        |
| 1746437259        | 1940        | 1940        | Lady with Red Hair             | Lady with Red Hair             | Bernhardt, Kurt                | Curtis Bernhardt      | tt0032687        |
| 1746436991        | 1940        | 1940        | Spring Parade                  | Spring Parade                  | Koster, Henry                  | Henry Koster          | tt0033095        |
| 1746584342        | 1940        | 1940        | Seven Sinners                  | Seven Sinners                  | Garnett, Tay                   | Tay Garnett           | tt0033038        |
| <b>1746420004</b> | <b>1940</b> | <b>1940</b> | <b>Mystery Sea Raider</b>      | <b>Mystery Sea Raider</b>      | <b>Dmytryk, Edward</b>         | <b>Edward Dmytryk</b> | <b>tt0032834</b> |
| 1746584948        | 1940        | 1940        | Pioneer Days                   | Pioneer Days                   | Webb, Harry S.                 | Harry S. Webb         | tt0032912        |
| 1746424405        | 1940        | 1939        | Straight Shooter               | Straight Shooter               | Newfield, Sam                  | Sam Newfield          | tt0033104        |
| 1746584954        | 1939        | 1939        | Smashing the Money Ring        | Smashing the Money Ring        | Morse, Terry                   | Terry O. Morse        | tt0031937        |
| 1746584146        | 1939        | 1938        | The Singing Cowgirl            | The Singing Cowgirl            | Diege, Samuel                  | Samuel Diege          | tt0031927        |
| 1746582538        | 1939        | 1939        | She Married a Cop              | She Married a Cop              | Salkow, Sidney                 | Sidney Salkow         | tt0031921        |
| 1746584315        | 1939        | 1939        | Night Work                     | Night Work                     | Archainbaud, George            | George Archainbaud    | tt0031723        |
| 1746585371        | 1939        | 1939        | Outlaws' Paradise              | Outlaws' Paradise              | Newfield, Sam                  | Sam Newfield          | tt0031769        |
| 1746584168        | 1939        | 1939        | Everything's on Ice            | Everything's on Ice            | Kenton, Erle C.                | Erle C. Kenton        | tt0031286        |
| 1746577823        | 1939        | 1939        | Trigger Fingers                | Trigger Fingers                | Newfield, Sam                  | Sam Newfield          | tt0032055        |
| 1746585047        | 1939        | 1939        | We Are Not Alone               | We Are Not Alone               | Goulding, Edmund               | Edmund Goulding       | tt0032115        |
| 1746582966        | 1938        | 1938        | Cocoanut Grove                 | Cocoanut Grove                 | Santell, Alfred                | Alfred Santell        | tt0030000        |
| 1746578066        | 1938        | 1938        | The Higgins Family             | The Higgins Family             | Meins, Gus                     | Gus Meins             | tt0030233        |
| 1746583146        | 1938        | 1938        | Rose of the Rio Grande         | Rose of the Rio Grande         | Nigh, William                  | William Nigh          | tt0030698        |
| 1746582524        | 1938        | 1938        | Port of Seven Seas             | Port of Seven Seas             | Whale, James                   | James Whale           | tt0030615        |
| 1746577927        | 1938        | 1937        | Daughter of Shanghai           | Daughter of Shanghai           | Florey, Robert                 | Robert Florey         | tt0028770        |
| 1746574641        | 1937        | 1937        | Shall We Dance                 | Shall We Dance                 | Sandrich, Mark                 | Mark Sandrich         | tt0029546        |
| 1746582553        | 1937        | 1937        | Wake Up and Live               | Wake Up and Live               | Lanfield, Sidney               | Sidney Lanfield       | tt0029744        |
| 1746582506        | 1937        | 1937        | Time Out for Romance           | Time Out for Romance           | St. Clair, Malcolm             | Malcolm St. Clair     | tt0029673        |
| 1746584400        | 1937        | 1937        | Internes Can't Take Money      | Internes Can't Take Money      | Santell, Alfred                | Alfred Santell        | tt0029050        |
| 1746582830        | 1937        | 1937        | Madame X                       | Madame X                       | Wood, Sam                      | Sam Wood              | tt0029179        |
| 1746575038        | 1937        | 1937        | Smart Blonde                   | Smart Blonde                   | McDonald, Frank                | Frank McDonald        | tt0029581        |
| 1746574920        | 1936        | 1936        | Too Many Parents               | Too Many Parents               | McGowan, Robert F.             | Robert F. McGowan     | tt0028395        |
| 1746580345        | 1936        | 1936        | Follow the Fleet               | Follow the Fleet               | Sandrich, Mark                 | Mark Sandrich         | tt0027630        |
| 1746574596        | 1936        | 1936        | Missing Girls                  | Missing Girls                  | Rosen, Phil                    | Phil Rosen            | tt0027974        |
| 1746577688        | 1936        | 1936        | The Golden Arrow               | The Golden Arrow               | Green, Alfred E.               | Alfred E. Green       | tt0027687        |
| 1746582588        | 1936        | 1936        | Give Us This Night             | Give Us This Night             | Hall, Alexander                | Alexander Hall        | tt0027680        |
| 1746583060        | 1936        | 1936        | Come and Get It                | Come and Get It                | Hawks, Howard; Wylers, William | Howard Hawks          | tt0027459        |
| 1746583996        | 1936        | 1936        | The Preview Murder Mystery     | The Preview Murder Mystery     | Florey, Robert                 | Robert Florey         | tt0028136        |
| 1746580801        | 1936        | 1936        | Custer's Last Stand            | Custer's Last Stand            | Clifton, Elmer                 | Elmer Clifton         | tt0357580        |

|                   |             |             |                                  |                                  |                                          |                     |                  |
|-------------------|-------------|-------------|----------------------------------|----------------------------------|------------------------------------------|---------------------|------------------|
| 1746580638        | 1935        | 1934        | The President Vanishes           | The President Vanishes           | Wellman, William A.                      | William A. Wellman  | tt0025674        |
| 1746578397        | 1961        | 1961        | The Deadly Companions            | The Deadly Companions            | Peckinpah, Sam                           | Sam Peckinpah       | tt0054795        |
| 1746579017        | 1961        | 1961        | Anatomy of a Psycho              | Anatomy of a Psycho              | Peters, Brooke L.                        | Boris Petroff       | tt0054627        |
| 1746581187        | 1961        | 1961        | Armored Command                  | Armored Command                  | Haskin, Byron                            | Byron Haskin        | tt0054636        |
| 1769972220        | 1961        | 1961        | Half Way to Hell                 | Half Way to Hell                 |                                          | Victor Adamson      | tt0142346        |
| 1746577328        | 1961        | 1961        | The Magic Fountain               | The Magic Fountain               | David, Allan                             | Allan David         | tt0055121        |
| 1746574394        | 1959        | 1959        | Attack of the Giant Leeches      | Attack of the Giant Leeches      | Kowalski, Bernard L.                     | Bernard L. Kowalski | tt0053611        |
| 1746577062        | 1959        | 1959        | Pork Chop Hill                   | Pork Chop Hill                   | Milestone, Lewis                         | Lewis Milestone     | tt0053183        |
| 1746577409        | 1959        | 1959        | Stump Run                        | Stump Run                        | Dew, Edward                              | Eddie Dew           | tt0053313        |
| 1746581002        | 1959        | 1959        | Shake Hands with the Devil       | Shake Hands with the Devil       | Anderson, Michael                        | Michael Anderson    | tt0053272        |
| 1746569907        | 1959        | 1959        | Alaska Passage                   | Alaska Passage                   | Bernds, Edward                           | Edward Berndts      | tt0052544        |
| 1746569997        | 1959        | 1959        | The Alligator People             | The Alligator People             | Del Ruth, Roy                            | Roy Del Ruth        | tt0052549        |
| 1746578466        | 1959        | 1959        | Pier 5, Havana                   | Pier 5, Havana                   | Cahn, Edward L.                          | Edward L. Cahn      | tt0053169        |
| 1746577127        | 1959        | 1959        | Operation Petticoat              | Operation Petticoat              | Edwards, Blake                           | Blake Edwards       | tt0053143        |
| 1746577257        | 1958        | 1958        | Vertigo                          | Vertigo                          | Hitchcock, Alfred                        | Alfred Hitchcock    | tt0052357        |
| 1746569654        | 1958        | 1958        | The Notorious Mr. Monks          | The Notorious Mr. Monks          | Kane, Joe                                | Joseph Kane         | tt0052010        |
| 1746573823        | 1957        | 1957        | The True Story of Jesse James    | The True Story of Jesse James    | Ray, Nicholas                            | Nicholas Ray        | tt0051114        |
| 1746562231        | 1957        | 1957        | The Giant Claw                   | The Giant Claw                   | Sears, Fred F.                           | Fred F. Sears       | tt0050432        |
| 1746561775        | 1957        | 1957        | Escape from San Quentin          | Escape from San Quentin          | Sears, Fred F.                           | Fred F. Sears       | tt0050365        |
| 1746562242        | 1957        | 1957        | Attack of the Crab Monsters      | Attack of the Crab Monsters      | Corman, Roger                            | Roger Corman        | tt0050147        |
| 1746573840        | 1957        | 1957        | So Lovely...So Deadly            | So Lovely... So Deadly           | Kohler, Will                             | Will Kohler         | tt1024872        |
| 1746561750        | 1956        | 1956        | Lisbon                           | Lisbon                           | Milland, R.                              | Ray Milland         | tt0049446        |
| 1746561808        | 1956        | 1956        | The King and Four Queens         | The King and Four Queens         | Walsh, Raoul                             | Raoul Walsh         | tt0049407        |
| 1746550236        | 1956        | 1956        | Quincannon, Frontier Scout       | Quincannon, Frontier Scout       | Selander, Lesley                         | Lesley Selander     | tt0049647        |
| 1746555587        | 1956        | 1956        | The Three Outlaws                | The Three Outlaws                | Newfield, Sam                            | Sam Newfield        | tt0049848        |
| 1746555254        | 1956        | 1956        | The Creature Walks Among Us      | The Creature Walks Among Us      | Sherwood, John                           | John Sherwood       | tt0049103        |
| 1746562417        | 1956        | 1956        | The Rack                         | The Rack                         | Laven, Arnold                            | Arnold Laven        | tt0049652        |
| 1746569936        | 1956        | 1956        | Never Say Goodbye                | Never Say Goodbye                | Hopper, Jerry                            | Jerry Hopper        | tt0049547        |
| 1746556002        | 1956        | 1956        | The Man in the Gray Flannel Suit | The Man in the Gray Flannel Suit | Johnson, Nunnally                        | Nunnally Johnson    | tt0049474        |
| 1746569915        | 1955        | 1955        | Teaserama                        | Teaserama                        | Klaw, Irving                             | Irving Klaw         | tt0048700        |
| 1746566183        | 1955        | 1955        | I Cover the Underworld           | I Cover the Underworld           | Springsteen, R. G.                       | R.G. Springsteen    | tt0048189        |
| 1746555050        | 1955        | 1955        | Hell's Horizon                   | Hell's Horizon                   | Gries, Tom                               | Tom Gries           | tt0048159        |
| 1746554797        | 1955        | 1955        | Jungle Moon Men                  | Jungle Moon Men                  | Gould, Charles S.                        | Charles S. Gould    | tt0048238        |
| 1746562352        | 1955        | 1955        | Smoke Signal                     | Smoke Signal                     | Hopper, Jerry                            | Jerry Hopper        | tt0048634        |
| 1746566315        | 1955        | 1955        | Battle Taxi                      | Battle Taxi                      | Strock, Herbert L.                       | Herbert L. Strock   | tt0047861        |
| 1746566001        | 1954        | 1954        | About Mrs. Leslie                | About Mrs. Leslie                | Mann, Daniel                             | Daniel Mann         | tt0046676        |
| 1746562143        | 1954        | 1954        | The Long, Long Trailer           | The Long, Long Trailer           | Minnelli, Vincente                       | Vincente Minnelli   | tt0047191        |
| 1746555797        | 1954        | 1954        | Dream Follies                    | Dream Follies                    | Tucker, Phil                             | Phil Tucker         | tt0132099        |
| 1746562385        | 1954        | 1954        | Creature from the Black Lagoon   | Creature from the Black Lagoon   | Arnold, Jack                             | Jack Arnold         | tt0046876        |
| 1746555423        | 1954        | 1954        | Massacre Canyon                  | Massacre Canyon                  | Sears, Fred F.                           | Fred F. Sears       | tt0047220        |
| 1746549816        | 1954        | 1954        | The Mad Magician                 | The Mad Magician                 | Brahm, John                              | John Brahm          | tt0047200        |
| 1746566272        | 1953        | 1953        | Red River Shore                  | Red River Shore                  | Keller, Harry                            | Harry Keller        | tt0046232        |
| 1746566506        | 1953        | 1953        | Wonder Valley                    | Wonder Valley                    | Graham, Jo                               | Jo Graham           | tt1194598        |
| 1746565875        | 1953        | 1953        | Goldtown Ghost Riders            | Goldtown Ghost Riders            | Archainbaud, George                      | George Archainbaud  | tt0045829        |
| 1746563978        | 1953        | 1952        | Come Back, Little Sheba          | Come Back, Little Sheba          | Mann, Daniel                             | Daniel Mann         | tt0044509        |
| 1746567079        | 1953        | 1953        | White Goddess                    | White Goddess                    | Fox, Wallace                             | Wallace Fox         | tt0046545        |
| 1746569493        | 1953        | 1953        | Man Crazy                        | Man Crazy                        | Lerner, Irving                           | Irving Lerner       | tt0046032        |
| 1746562196        | 1953        | 1953        | Little Fugitive                  | Little Fugitive                  | Ashley, Ray; Engel, Morris; Orkin, Rufus | Ray Ashley          | tt0046004        |
| 1746569562        | 1953        | 1953        | Trail Blazers                    | Trail Blazers                    | Barry, Wesley                            | Wesley Barry        | tt0046454        |
| 1746566243        | 1953        | 1953        | Woman They Almost Lynched        | Woman They Almost Lynched        | Dwan, Allan                              | Allan Dwan          | tt0046556        |
| 1746566266        | 1953        | 1953        | Slaves of Babylon                | Slaves of Babylon                | Castle, William                          | William Castle      | tt0046328        |
| 1746562049        | 1953        | 1953        | El Paso Stampede                 | El Paso Stampede                 | Keller, Harry                            | Harry Keller        | tt0045726        |
| 1746566343        | 1953        | 1953        | Serpent of the Nile              | Serpent of the Nile              | Castle, William                          | William Castle      | tt0046298        |
| <b>1746562287</b> | <b>1953</b> | <b>1953</b> | <b>Fangs of the Arctic</b>       | <b>Fangs of the Arctic</b>       | <b>Bailey, Rex</b>                       | <b>Rex Bailey</b>   | <b>tt0045748</b> |
| 1746568133        | 1952        | 1952        | Junction City                    | Junction City                    | Nazarro, Ray                             | Ray Nazarro         | tt0044775        |
| 1746565573        | 1952        | 1952        | Dreamboat                        | Dreamboat                        | Binyon, Claude                           | Claude Binyon       | tt0044566        |
| 1746565033        | 1952        | 1952        | The Half-Breed                   | The Half Breed                   | Gilmore, Stuart; Ludwig, Edward          | Stuart Gilmore      | tt0044681        |

|            |      |      |                                   |                                   |                                    |                        |           |
|------------|------|------|-----------------------------------|-----------------------------------|------------------------------------|------------------------|-----------|
| 1746570370 | 1952 | 1952 | The Rough, Tough West             | The Rough, Tough West             | Nazarro, Ray                       | Ray Nazarro            | tt0045107 |
| 1746570378 | 1952 | 1952 | Captive of Billy the Kid          | Captive of Billy the Kid          | Brannon, Fred C.                   | Fred C. Brannon        | tt0044478 |
| 1746570098 | 1952 | 1952 | Voodoo Tiger                      | Voodoo Tiger                      | Bennet, Spencer G.                 | Spencer Gordon Bennet  | tt0045300 |
| 1746570867 | 1952 | 1952 | Thundering Caravans               | Thundering Caravans               | Keller, Harry                      | Harry Keller           | tt0045238 |
| 1746563951 | 1952 | 1952 | Canyon Ambush                     | Canyon Ambush                     | Collins, Lewis                     | Lewis D. Collins       | tt0044471 |
| 1746570225 | 1952 | 1952 | The Hawk of Wild River            | The Hawk of Wild River            | Sears, Fred F.                     | Fred F. Sears          | tt0044694 |
| 1746564794 | 1952 | 1952 | Holiday for Sinners               | Holiday for Sinners               | Mayer, Gerald                      | Gerald Mayer           | tt0044715 |
| 1746570258 | 1952 | 1952 | Captive Women                     | Captive Women                     | Gilmore, Stuart                    | Stuart Gilmore         | tt0044477 |
| 1746570299 | 1952 | 1952 | Hoodlum Empire                    | Hoodlum Empire                    | Kane, Joseph                       | Joseph Kane            | tt0044720 |
| 1746218792 | 1972 | 1972 | Trap on Cougar Mountain           | Trap on Cougar Mountain           | Larsen, Keith                      | Keith Larsen           | tt0069403 |
| 1746218913 | 1972 | 1972 | Stigma                            | Stigma                            | Durston, David E.                  | David E. Durston       | tt0069312 |
| 1746211240 | 1972 | 1972 | The Trial of the Catonsville Nine | The Trial of the Catonsville Nine | Davidson, Gordon                   | Gordon Davidson        | tt0069406 |
| 1746235020 | 1972 | 1972 | Bone                              | Bone                              | Cohen, Larry                       | Larry Cohen            | tt0068306 |
| 1746211490 | 1970 | 1970 | Pufnstuf                          | Pufnstuf                          | Morse, Hollingsworth               | Hollingsworth Morse    | tt0066256 |
| 1746234731 | 1970 | 1970 | Song of Norway                    | Song of Norway                    | Stone, Andrew L.                   | Andrew L. Stone        | tt0066393 |
| 1769971130 | 1970 | 1970 | The Grape Dealer's Daughter       | The Grapedealer's Daughter        | Gutman, Walter                     | Walter Gutman          | tt0206784 |
| 1769970690 | 1968 | 1969 | The Mind Blowers                  | The Mind Blowers                  | Renvok, Harlan                     | Harlan Renvok          | tt0197683 |
| 1746218350 | 1968 | 1968 | The Edge                          | The Edge                          | Kramer, Robert                     | Robert Kramer          | tt0061612 |
| 1769970431 | 1968 | 1968 | Suburban Roulette                 | Suburban Roulette                 | Lewis, Herschell Gordon            | Herschell Gordon Lewis | tt0062317 |
| 1746208709 | 1968 | 1968 | Just for the Hell of It           | Just for the Hell of It           | Lewis, Herschell Gordon            | Herschell Gordon Lewis | tt0063167 |
| 1746185820 | 1968 | 1968 | The Night They Raided Minsky's    | The Night They Raided Minsky's    | Friedkin, William                  | William Friedkin       | tt0063348 |
| 1746209541 | 1967 | 1967 | Point Blank                       | Point Blank                       | Boorman, John                      | John Boorman           | tt0062138 |
| 1746199496 | 1967 | 1967 | Fort Utah                         | Fort Utah                         | Selander, Lesley                   | Lesley Selander        | tt0062989 |
| 1769970628 | 1966 | 1966 | Take Me Naked                     | Take Me Naked                     | Marsh, Julian; Riva, Anna          | Michael Findlay        | tt0061060 |
| 1746209425 | 1966 | 1966 | Three on a Couch                  | Three on a Couch                  | Lewis, Jerry                       | Jerry Lewis            | tt0061093 |
| 1746198987 | 1966 | 1966 | The Ghost in the Invisible Bikini | The Ghost in the Invisible Bikini | Weis, Don                          | Don Weis               | tt0060457 |
| 1746553727 | 1964 | 1964 | Passion in the Sun                | Passion in the Sun                | Berry, Dale                        | Dale Berry             | tt0058455 |
| 1769969353 | 1964 | 1964 | Olga's House of Shame             | Olga's House of Shame             | Mawra, Joseph P.                   | Joseph P. Mawra        | tt0126562 |
| 1746560092 | 1964 | 1964 | What a Way To Go!                 | What a Way to Go!                 | Thompson, J. Lee                   | J. Lee Thompson        | tt0058743 |
| 1746553990 | 1964 | 1964 | Youngblood Hawke                  | Youngblood Hawke                  | Daves, Delmer                      | Delmer Daves           | tt0058764 |
| 1746554514 | 1964 | 1964 | The Unsinkable Molly Brown        | The Unsinkable Molly Brown        | Walters, Charles                   | Charles Walters        | tt0058708 |
| 1746574880 | 1935 | 1935 | Western Courage                   | Western Courage                   | Bennet, Spencer Gordon             | Spencer Gordon Bennet  | tt0027197 |
| 1746582668 | 1935 | 1935 | Page Miss Glory                   | Page Miss Glory                   | LeRoy, Mervyn                      | Mervyn LeRoy           | tt0026840 |
| 1746580304 | 1935 | 1935 | Rumba                             | Rumba                             | Gering, Marion                     | Marion Gering          | tt0026956 |
| 1746582756 | 1935 | 1935 | In Spite of Danger                | In Spite of Danger                | Hillyer, Lambert                   | Lambert Hillyer        | tt0026526 |
| 1746580862 | 1935 | 1935 | She                               | She                               | Pichel, Irving; Holden, Lansing C. | Lansing C. Holden      | tt0026983 |
| 1746580377 | 1935 | 1935 | No Man's Range                    | No Man's Range                    | Bradbury, Robert N.                | Robert N. Bradbury     | tt0026785 |
| 1746580372 | 1935 | 1935 | Laddie                            | Laddie                            | Stevens, George                    | George Stevens         | tt0026592 |
| 1746580772 | 1935 | 1934 | Border Guns                       | Border Guns                       | Horner, Robert J.                  | Robert J. Horner       | tt0026128 |
| 1746577947 | 1935 | 1935 | Wagon Trail                       | Wagon Trail                       | Fraser, Harry                      | Harry L. Fraser        | tt0027180 |
| 1746571120 | 1935 | 1935 | Rescue Squad                      | Rescue Squad                      | Bennet, Spencer Gordon             | Spencer Gordon Bennet  | tt0026924 |
| 1746574657 | 1935 | 1935 | Murder Man                        | The Murder Man                    | Whelan, Tim                        | Tim Whelan             | tt0026739 |
| 1746582687 | 1935 | 1935 | Roberta                           | Roberta                           | Seiter, William A.                 | William A. Seiter      | tt0026942 |
| 1746574597 | 1934 | 1934 | Mystery Ranch                     | Mystery Ranch                     | Ray, B. B.                         | Bernard B. Ray         | tt0025545 |
| 1746570086 | 1934 | 1934 | Dangerous Corner                  | Dangerous Corner                  | Rosen, Phil                        | Phil Rosen             | tt0025031 |
| 1746570568 | 1934 | 1934 | Ticket to a Crime                 | Ticket to a Crime                 | Collins, Lewis D.                  | Lewis D. Collins       | tt0025895 |
| 1746571266 | 1934 | 1934 | Double Door                       | Double Door                       | Vidor, Charles                     | Charles Vidor          | tt0025064 |
| 1746584220 | 1934 | 1933 | His Double Life                   | His Double Life                   | Hopkins, Arthur                    | Arthur Hopkins         | tt0024122 |
| 1746568215 | 1934 | 1935 | Tracy Rides                       | Tracy Rides                       | Webb, Harry S.                     | Harry S. Webb          | tt0027127 |
| 1746570421 | 1934 | 1934 | Redhead                           | Redhead                           | Brown, Melville                    | Edward L. Cahn         | tt0025707 |
| 1746566841 | 1933 | 1933 | State Trooper                     | State Trooper                     | Lederman, D. Ross                  | D. Ross Lederman       | tt0024611 |
| 1746570307 | 1933 | 1933 | Kiss of Araby                     | Kiss of Araby                     | Rosen, Phil                        | Phil Rosen             | tt0024223 |
| 1746574822 | 1933 | 1933 | Riot Squad                        | Riot Squad                        | Webb, Harry S.                     | Harry S. Webb          | tt0024503 |
| 1746567688 | 1933 | 1933 | Alimony Madness                   | Alimony Madnes                    | Eason, Breezy                      | B. Reeves Eason        | tt0023754 |
| 1746570218 | 1933 | 1933 | The California Trail              | The California Trail              | Hillyer, Lambert                   | Lambert Hillyer        | tt0023866 |
| 1746570586 | 1933 | 1933 | Flying Devils                     | Flying Devils                     | Birdwell, Russell                  | Russell Birdwell       | tt0024024 |
| 1746567571 | 1933 | 1933 | Humanity                          | Humanity                          | Dillon, John Francis               | John Francis Dillon    | tt0024146 |

|            |      |      |                               |                               |                                    |                     |           |
|------------|------|------|-------------------------------|-------------------------------|------------------------------------|---------------------|-----------|
| 1746574638 | 1933 | 1933 | The Ship of Wanted Men        | Ship of Wanted Men            | Collins, Lew                       | Lewis D. Collins    | tt0024551 |
| 1746574989 | 1933 | 1933 | The Avenger                   | The Avenger                   | Marin, Edwin L.                    | Edwin L. Marin      | tt0023773 |
| 1746574553 | 1933 | 1933 | Goodbye Again                 | Goodbye Again                 | Curtiz, Michael                    | Michael Curtiz      | tt0024075 |
| 1746566881 | 1933 | 1933 | Ann Carver's Profession       | Ann Carver's Profession       | Buzzell, Edward                    | Edward Buzzell      | tt0023758 |
| 1746567355 | 1933 | 1933 | Son of the Border             | Son of the Border             | Nosler, Lloyd                      | Lloyd Nosler        | tt0024595 |
| 1746574495 | 1933 | 1933 | Air Hostess                   | Air Hostess                   | Rogell, Albert                     | Albert S. Rogell    | tt0023749 |
| 1746574936 | 1933 | 1933 | Narcotic                      | Narcotic                      | Sodar't, Vival                     | Dwain Esper         | tt0121587 |
| 1746570607 | 1933 | 1933 | Before Morning                | Before Morning                | Hoerl, Arthur                      | Arthur Hoerl        | tt0023791 |
| 1746574608 | 1933 | 1933 | Gun Law                       | Gun Law                       | Collins, Lew                       | Lewis D. Collins    | tt0024082 |
| 1746570719 | 1933 | 1933 | The Fugitive                  | The Fugitive                  | Fraser, Harry                      | Harry L. Fraser     | tt0024042 |
| 1746567691 | 1933 | 1932 | Flaming Gold                  | Flaming Gold                  | Ince, Ralph                        | Ralph Ince          | tt0024018 |
| 1746571107 | 1933 | 1933 | Police Call                   | Police Call                   | Whitman, Philip H.                 | Phil Whitman        | tt0134037 |
| 1746573485 | 1932 | 1932 | Texas Buddies                 | Texas Buddies                 | Bradbury, Robert N.                | Robert N. Bradbury  | tt0023566 |
| 1746560816 | 1932 | 1932 | Tangled Destinies             | Tangled Destinies             | Strayer, Frank                     | Frank R. Strayer    | tt0023549 |
| 1746571958 | 1932 | 1932 | Get That Girl                 | Get That Girl                 | Crone, George                      | George Crone        | tt0214714 |
| 1746566662 | 1932 | 1932 | The Woman in Room 13          | The Woman in Room 13          | King, Henry                        | Henry King          | tt0023707 |
| 1746560959 | 1932 | 1932 | The Divorce Racket            | The Divorce Racket            | Scott, Aubrey                      | Aubrey Scott        | tt0409903 |
| 1746561358 | 1932 | 1932 | Honor of the Press            | The Honor of the Press        | Eason, Reeves                      | B. Reeves Eason     | tt0023025 |
| 1746572422 | 1932 | 1932 | Wild Horse Mesa               | Wild Horse Mesa               | Hathaway, Henry                    | Henry Hathaway      | tt0024774 |
| 1746573603 | 1932 | 1932 | The Black King                | The Black King                | Pollard, Bud                       | Bud Pollard         | tt0022692 |
| 1746561004 | 1932 | 1932 | The Face on the Barroom Floor | The Face on the Barroom Floor | Bracken, Bert                      | Bertram Bracken     | tt0150495 |
| 1746576901 | 1932 | 1932 | Three Wise Girls              | Three Wise Girls              | Beaudine, William                  | William Beaudine    | tt0023589 |
| 1746576524 | 1932 | 1932 | The Fighting Fool             | The Fighting Fool             | Hillyer, Lambert                   | Lambert Hillyer     | tt0021862 |
| 1746568142 | 1932 | 1932 | The Silent Witness            | The Silent Witness            | Varnel, Marcel; Hough, R. L.       | R.L. Hough          | tt0023471 |
| 1746560933 | 1932 | 1932 | The Wiser Sex                 | The Wiser Sex                 | Viertel, Berthold                  | Berthold Viertel    | tt0023702 |
| 1746560700 | 1932 | 1932 | A Scarlet Week-End            | A Scarlet Week End            | Melford, George                    | George Melford      | tt0023430 |
| 1746568353 | 1932 | 1932 | Steady Company                | Steady Company                | Ludwig, Edward                     | Edward Ludwig       | tt0023508 |
| 1746568000 | 1932 | 1932 | The Menace                    | The Menace                    | Neill, Roy William                 | Roy William Neill   | tt0020875 |
| 1746573502 | 1932 | 1932 | Dance Team                    | Dance Team                    | Lanfield, Sidney                   | Sidney Lanfield     | tt0022798 |
| 1746576296 | 1932 | 1932 | Payment Deferred              | Payment Deferred              | Mendes, Lothar                     | Lothar Mendes       | tt0023326 |
| 1746573629 | 1932 | 1932 | Exposure                      | Exposure                      | Houston, Norman                    | Norman Houston      | tt0022866 |
| 1746575899 | 1932 | 1932 | This Is the Night             | This Is the Night             | Tuttle, Frank                      | Frank Tuttle        | tt0023584 |
| 1746583666 | 1931 | 1931 | Convicted                     | Convicted                     | Cabanne, Christy                   | Christy Cabanne     | tt0021763 |
| 1746582253 | 1931 | 1931 | Secret Menace                 | The Secret Menace             | Kahn, Richard C.                   | Richard C. Kahn     | tt0274080 |
| 1746583944 | 1931 | 1931 | Girls Demand Excitement       | Girls Demand Excitement       | Felix, Seymour                     | Seymour Felix       | tt0021911 |
| 1746583434 | 1931 | 1931 | Chances                       | Chances                       | Dwan, Allan                        | Allan Dwan          | tt0021732 |
| 1746571848 | 1931 | 1931 | One Heavenly Night            | One Heavenly Night            | Fitzmaurice, Geo.                  | George Fitzmaurice  | tt0021280 |
| 1746575543 | 1931 | 1931 | A Private Scandal             | A Private Scandal             | Hutchison, Charles                 | Charles Hutchison   | tt0164828 |
| 1746571587 | 1931 | 1931 | Goldie                        | Goldie                        | Stoloff, Benjamin                  | Benjamin Stoloff    | tt0021920 |
| 1746584512 | 1931 | 1931 | Finn and Hattie               | Finn and Hattie               | Taug, Norman; McLeod, Norman       | Norman Z. McLeod    | tt0021867 |
| 1746573574 | 1931 | 1931 | Guilty Hands                  | Guilty Hands                  | Van Dyke, W. S.; Barrymore, Lionel | W.S. Van Dyke       | tt0021933 |
| 1746575542 | 1931 | 1931 | Transatlantic                 | Transatlantic                 | Howard, William K.                 | William K. Howard   | tt0022500 |
| 1746584468 | 1931 | 1931 | X Marks the Spot              | X Marks the Spot              | Kenton, Erle C.                    | Erle C. Kenton      | tt0022580 |
| 1746576900 | 1931 | 1931 | Flying Lariats                | Flying Lariats                | Kirkland, David                    | Alan James          | tt0021880 |
| 1746576868 | 1931 | 1931 | Nice Women                    | Nice Women                    | Knopf, Edwin H.                    | Edwin H. Knopf      | tt0023264 |
| 1746584496 | 1931 | 1931 | The Brat                      | The Brat                      | Ford, John                         | John Ford           | tt0021695 |
| 1746583767 | 1931 | 1931 | Branded                       | Branded                       | Lederman, D. Ross                  | D. Ross Lederman    | tt0021693 |
| 1746576199 | 1931 | 1931 | Never the Twain Shall Meet    | Never the Twain Shall Meet    | Van Dyke, W. S.                    | W.S. Van Dyke       | tt0022197 |
| 1746575635 | 1931 | 1931 | A Tailor Made Man             | A Tailor Made Man             | Wood, Sam                          | Sam Wood            | tt0022459 |
| 1746583226 | 1930 | 1930 | The Sea Bat                   | The Sea Bat                   | Ruggles, Wesley                    | Lionel Barrymore    | tt0021345 |
| 1746584782 | 1930 | 1930 | Love Among the Millionaires   | Love Among the Millionaires   | Tuttle, Frank                      | Frank Tuttle        | tt0023154 |
| 1746585221 | 1930 | 1930 | The Love Trader               | The Love Trader               | Henabery, Joseph E.                | Joseph Henabery     | tt0021098 |
| 1746583961 | 1930 | 1930 | Morocco                       | Morocco                       | Sternberg, Josef von               | Josef von Sternberg | tt0021156 |
| 1746585198 | 1930 | 1930 | Those Three French Girls      | Those Three French Girls      | Beaumont, Harry                    | Harry Beaumont      | tt0021470 |
| 1746585119 | 1930 | 1930 | The Medicine Man              | The Medicine Man              | Pembroke, Scott                    | Scott Pembroke      | tt0021134 |
| 1746582356 | 1930 | 1930 | Heads Up                      | Heads Up                      | Schertzinger, Victor               | Victor Schertzinger | tt0020956 |
| 1746584767 | 1930 | 1930 | Strictly Unconventional       | Strictly Unconventional       | Burton, David                      | David Burton        | tt0021422 |

|            |      |      |                                          |                                          |                                 |                          |           |
|------------|------|------|------------------------------------------|------------------------------------------|---------------------------------|--------------------------|-----------|
| 1746583782 | 1930 | 1930 | Danger Lights                            | Danger Lights                            | Seitz, George B.                | George B. Seitz          | tt0020806 |
| 1746585338 | 1930 | 1930 | Loose Ankles                             | Loose Ankles                             | Wilde, Ted                      | Ted Wilde                | tt0021087 |
| 1746584633 | 1930 | 1930 | High Society Blues                       | High Society Blues                       | Butler, David                   | David Butler             | tt0020973 |
| 1746585267 | 1930 | 1930 | The Big Fight                            | The Big Fight                            | Lang, Walter                    | Walter Lang              | tt0020684 |
| 1746584529 | 1930 | 1930 | The Princess and the Plumber             | The Princess and the Plumber             | Korda, Alexander                | Alexander Korda          | tt0021272 |
| 1746582377 | 1930 | 1930 | A Man From Wyoming                       | A Man from Wyoming                       | Lee, Rowland V.                 | Rowland V. Lee           | tt0021112 |
| 1746583723 | 1930 | 1930 | Women Everywhere                         | Women Everywhere                         | Korda, Alexander                | Alexander Korda          | tt0021561 |
| 1746583603 | 1930 | 1930 | Wide Open                                | Wide Open                                | Mayo, Archie                    | Archie Mayo              | tt0021550 |
| 1746583229 | 1930 | 1930 | Dancing Sweeties                         | Dancing Sweeties                         | Enright, Ray                    | Ray Enright              | tt0020805 |
| 1746584724 | 1930 | 1930 | The Storm                                | The Storm                                | Wylar, William                  | William Wylar            | tt0021418 |
| 1746583545 | 1930 | 1930 | Honey                                    | Honey                                    | Ruggles, Wesley                 | Wesley Ruggles           | tt0020986 |
| 1746583254 | 1930 | 1930 | Firebrand Jordan                         | Firebrand Jordan                         | Neitz, Alvin J.                 | Alan James               | tt0020886 |
| 1746584573 | 1930 | 1930 | For the Love o' Lil                      | For the Love o' Lil                      | Tinling, James                  | James Tinling            | tt0020897 |
| 1746581941 | 1930 | 1930 | Troopers Three                           | Troopers Three                           | Taugo, Norman; Eason, Reeves    | B. Reeves Eason          | tt0021491 |
| 1746584802 | 1930 | 1930 | The Light of Western Stars               | The Light of Western Stars               | Brower, Otto; Knopf, Edwin H.   | Otto Brower              | tt0021070 |
| 1746584579 | 1930 | 1930 | Laughter                                 | Laughter                                 | D'Arrast, H. D'Abbadie          | Harry d'Abbadie d'Arrast | tt0021053 |
| 1746585210 | 1930 | 1930 | The Widow From Chicago                   | The Widow from Chicago                   | Cline, Edward                   | Edward F. Cline          | tt0021551 |
| 1746583338 | 1930 | 1930 | Call of the West                         | Call of the West                         | Ray, Albert                     | Albert Ray               | tt0020726 |
| 1746581807 | 1929 | 1929 | Tide of Empire                           | Tide of Empire                           | Dwan, Allan                     | Allan Dwan               | tt0020502 |
| 1746584831 | 1929 | 1928 | Abie's Irish Rose                        | Abie's Irish Rose                        | Fleming, Victor                 | Victor Fleming           | tt0018613 |
| 1746583245 | 1929 | 1929 | The Man I Love                           | The Man I Love                           | Wellman, William                | William A. Wellman       | tt0020135 |
| 1746585053 | 1929 | 1929 | The One Woman Idea                       | The One Woman Idea                       | Viertel, Berthold               | Berthold Viertel         | tt0020244 |
| 1746583952 | 1929 | 1929 | Our Modern Maidens                       | Our Modern Maidens                       | Conway, Jack                    | Jack Conway              | tt0020247 |
| 1745342708 | 2001 | 2001 | Hedwig and the Angry Inch                | Hedwig and the Angry Inch                | Mitchell, John Cameron          | John Cameron Mitchell    | tt0248845 |
| 1746437124 | 2000 | 2000 | Hoover                                   | Hoover                                   | Pamplin, Rick                   | Rick Pamplin             | tt0230308 |
| 1746439459 | 1999 | 1998 | In Search of Kundun with Martin Scorsese | In Search of Kundun with Martin Scorsese | Wilson, Michael Henry           | Michael Henry Wilson     | tt0169410 |
| 1746421198 | 1999 | 1998 | Olympia                                  | Olympia                                  | Byington, Robert                | Bob Byington             | tt0147111 |
| 1746454253 | 1999 | 1999 | Cherry                                   | Cherry                                   | Gascoe, Jon ; Pierson, Joseph   | Jon Gascoe               | tt0139112 |
| 1746435321 | 1999 | 1999 | Tumbleweeds                              | Tumbleweeds                              | O'Connor, Gavin                 | Gavin O'Connor           | tt0161023 |
| 1746453879 | 1998 | 1997 | Clockwatchers                            | Clockwatchers                            | Sprecher, Jill                  | Jill Sprecher            | tt0118866 |
| 174645465  | 1998 | 1998 | Outside Ozona                            | Outside Ozona                            | Cardone, J. S.                  | J.S. Cardone             | tt0144546 |
| 1746439998 | 1998 | 1998 | Savior                                   | Savior                                   | Antoniijevic, Peter             | Predrag Antonijevic      | tt0120070 |
| 1746434676 | 1998 | 1998 | Ride                                     | Ride                                     | Shelton, Millicent              | Millicent Shelton        | tt0120707 |
| 1746438712 | 1997 | 1997 | Romy and Michele's High School Reunion   | Romy and Michele's High School Reunion   | Mirkin, David                   | David Mirkin             | tt0120032 |
| 1746422949 | 1997 | 1997 | Deconstructing Harry                     | Deconstructing Harry                     | Allen, Woody                    | Woody Allen              | tt0118954 |
| 1746434669 | 1996 | 1996 | The Spitfire Grill                       | The Spitfire Grill                       | Zlotoff, Lee David              | Lee David Zlotoff        | tt0117718 |
| 1746421321 | 1996 | 1996 | Big Night                                | Big Night                                | Tucci, Stanley; Scott, Campbell | Campbell Scott           | tt0115678 |
| 1746439082 | 1996 | 1996 | Bed of Roses                             | Bed of Roses                             | Goldenberg, Michael             | Michael Goldenberg       | tt0115644 |
| 1746435025 | 1995 | 1995 | Clueless                                 | Clueless                                 | Heckerling, Amy                 | Amy Heckerling           | tt0112697 |
| 1746422651 | 1995 | 1995 | Assassins                                | Assassins                                | Donner, Richard                 | Richard Donner           | tt0112401 |
| 1746423047 | 1994 | 1994 | Murder Magic                             | Murder Magic                             | Williams, Windell               | Windell Williams         | tt0275536 |
| 1746420792 | 1994 | 1994 | Junior                                   | Junior                                   | Reitman, Ivan                   | Ivan Reitman             | tt0110216 |
| 1746422097 | 1993 | 1993 | Free Willy                               | Free Willy                               | Wincer, Simon                   | Simon Wincer             | tt0106965 |
| 1746410594 | 1992 | 1991 | Highway to Hell                          | Highway to Hell                          | de Jong, Ate                    | Ate de Jong              | tt0104418 |
| 1746394235 | 1991 | 1991 | Only the Lonely                          | Only the Lonely                          | Columbus, Chris                 | Chris Columbus           | tt0102598 |
| 1746408663 | 1991 | 1991 | Career Opportunities                     | Career Opportunities                     | Gordon, Bryan                   | Bryan Gordon             | tt0101545 |
| 1746394704 | 1991 | 1991 | Showdown in Little Tokyo                 | Showdown in Little Tokyo                 | Lester, Mark L.                 | Mark L. Lester           | tt0102915 |
| 1746410521 | 1990 | 1990 | Come See the Paradise                    | Come See the Paradise                    | Parker, Alan                    | Alan Parker              | tt0099291 |
| 1746409815 | 1989 | 1989 | Hit List                                 | Hit List                                 | Lustig, William                 | William Lustig           | tt0095311 |
| 1746409784 | 1989 | 1989 | River of Death                           | River of Death                           | Carver, Steve                   | Steve Carver             | tt0098205 |
| 1746409355 | 1989 | 1989 | Cheetah                                  | Cheetah                                  | Blyth, Jeff                     | Jeff Blyth               | tt0097053 |
| 1746419384 | 1988 | 1988 | Friday the 13th Part VII--The New Blood  | Friday the 13th Part VII: The New Blood  | Buechler, John Carl             | John Carl Buechler       | tt0095179 |
| 1746198054 | 1966 | 1966 | The Bible...In the Beginning             | The Bible: In the Beginning...           | Huston, John                    | John Huston              | tt0060164 |
| 1746569952 | 1957 | 1957 | Drango                                   | Drango                                   | Bartlett, Hall; Bricken, Jules  | Hall Bartlett            | tt0050338 |
| 1746569982 | 1957 | 1956 | Three Brave Men                          | Three Brave Men                          | Dunne, Philip                   | Philip Dunne             | tt0051076 |
| 1746554823 | 1955 | 1955 | Blackboard Jungle                        | Blackboard Jungle                        | Brooks, Richard                 | Richard Brooks           | tt0047885 |
| 1746216899 | 1967 | 1967 | El Dorado                                | El Dorado                                | Hawks, Howard                   | Howard Hawks             | tt0061619 |

|            |      |      |                                |                                |                               |                      |           |
|------------|------|------|--------------------------------|--------------------------------|-------------------------------|----------------------|-----------|
| 1746579051 | 1961 | 1961 | The Absent-Minded Professor    | The Absent Minded Professor    | Stevenson, Robert             | Robert Stevenson     | tt0054594 |
| 1746578727 | 1963 | 1963 | Move Over, Darling             | Move Over, Darling             | Gordon, Michael               | Michael Gordon       | tt0057329 |
| 1746464898 | 1945 | 1945 | The Spanish Main               | The Spanish Main               | Borzage, Frank                | Frank Borzage        | tt0038108 |
| 1746249200 | 1978 | 1978 | Hooper                         | Hooper                         | Needham, Hal                  | Hal Needham          | tt0077696 |
| 1746562257 | 1955 | 1955 | The Long Gray Line             | The Long Gray Line             | Ford, John                    | John Ford            | tt0048312 |
| 1746234835 | 1967 | 1967 | Hurry Sundown                  | Hurry Sundown                  | Preminger, Otto               | Otto Preminger       | tt0061796 |
| 1746566125 | 1958 | 1958 | The Brothers Karamazov         | The Brothers Karamazov         | Brooks, Richard               | Richard Brooks       | tt0051435 |
| 1746576946 | 1950 | 1950 | The Reformer and the Redhead   | The Reformer and the Redhead   | Panama, Norman; Frank, Melvin | Melvin Frank         | tt0042883 |
| 1746435016 | 1989 | 1989 | K-9                            | K 9                            | Daniel, Rod                   | Rod Daniel           | tt0097637 |
| 1746554713 | 1964 | 1964 | Nothing but a Man              | Nothing But a Man              | Roemer, Michael               | Michael Roemer       | tt0058414 |
| 1746475500 | 1948 | 1948 | The Loves of Carmen            | The Loves of Carmen            | Vidor, Charles                | Charles Vidor        | tt0040552 |
| 1746574146 | 1961 | 1961 | Bachelor in Paradise           | Bachelor in Paradise           | Arnold, Jack                  | Jack Arnold          | tt0054652 |
| 1746235835 | 1980 | 1980 | Hangar 18                      | Hangar 18                      | Conway, James L.              | James L. Conway      | tt0080836 |
| 1746573982 | 1962 | 1962 | Light in the Piazza            | Light in the Piazza            | Green, Guy                    | Guy Green            | tt0056183 |
| 1746233597 | 1966 | 1966 | Our Man Flint                  | Our Man Flint                  | Mann, Daniel                  | Daniel Mann          | tt0059557 |
| 1746500322 | 1925 | 1925 | Lady Windermere's Fan          | Lady Windermere's Fan          | Lubitsch, Ernst               | Ernst Lubitsch       | tt0016004 |
| 1746520910 | 1949 | 1949 | The Reckless Moment            | The Reckless Moment            | Opuls, Max                    | Max Ophüls           | tt0041786 |
| 1746486521 | 1920 | 1920 | The Devil's Passkey            | The Devil's Passkey            | Stroheim, Erich von           | Erich von Stroheim   | tt0011114 |
| 1746492439 | 1946 | 1946 | Two Years Before the Mast      | Two Years Before the Mast      | Farrow, John                  | John Farrow          | tt0039056 |
| 1746491795 | 1945 | 1945 | Scarlet Street                 | Scarlet Street                 | Lang, Fritz                   | Fritz Lang           | tt0038057 |
| 1746420518 | 1991 | 1991 | City Slickers                  | City Slickers                  | Underwood, Ron                | Ron Underwood        | tt0101587 |
| 1746561650 | 1932 | 1932 | Mark of the Spur               | Mark of the Spur               | McGowan, J. P.                | J.P. McGowan         | tt0023191 |
| 1746585141 | 1930 | 1930 | Murder on the Roof             | Murder on the Roof             | Seitz, George B.              | George B. Seitz      | tt0021164 |
| 1746234236 | 1967 | 1967 | Thoroughly Modern Millie       | Thoroughly Modern Millie       | Hill, George Roy              | George Roy Hill      | tt0062362 |
| 1745373924 | 2002 | 2002 | Collateral Damage              | Collateral Damage              | Davis, Andrew                 | Andrew Davis         | tt0233469 |
| 1746585332 | 1929 | 1929 | So Long Letty                  | So Long Letty                  | Bacon, Lloyd                  | Lloyd Bacon          | tt0021394 |
| 1746218125 | 1968 | 1968 | Eve                            | Eve                            | Summers, Jeremy               | Robert Lynn          | tt0062951 |
| 1746455169 | 1994 | 1994 | Rapa Nui                       | Rapa Nui                       | Reynolds, Kevin               | Kevin Reynolds       | tt0110944 |
| 1746508756 | 1948 | 1948 | The Woman from Tangier         | The Woman from Tangier         | Daniels, Harold               | Harold Daniels       | tt0178991 |
| 1746545071 | 1940 | 1940 | Danger Ahead                   | Danger Ahead                   | Staub, Ralph                  | Ralph Staub          | tt0032379 |
| 1769970688 | 1968 | 1968 | "You"                          | You                            | Hunt, Paul                    | Paul Hunt            | tt0134224 |
| 1746509423 | 1924 | 1924 | The Mask of Lopez              | The Mask of Lopez              | Rogell, Albert                | Albert S. Rogell     | tt0015123 |
| 1745293615 | 2005 | 2004 | Hellbent                       | Hellbent                       | Etheredge-Ouzts, Paul         | Paul Etheredge       | tt0356159 |
| 1746453547 | 1943 | 1943 | Hello Frisco, Hello            | Hello Frisco, Hello            | Humberstone, Bruce            | H. Bruce Humberstone | tt0035982 |
| 1746584776 | 1929 | 1929 | Shanghai Lady                  | Shanghai Lady                  | Robertson, John S.            | John S. Robertson    | tt0020393 |
| 1746508229 | 1949 | 1949 | West of El Dorado              | West of El Dorado              | Taylor, Ray                   | Ray Taylor           | tt0163401 |
| 1746561827 | 1954 | 1954 | Killer Leopard                 | Killer Leopard                 | Beebe, Ford                   | Ford Beebe           | tt0047148 |
| 1745393827 | 2008 | 2008 | Australia                      | Australia                      | Luhrmann, Baz                 | Baz Luhrmann         | tt0455824 |
| 1745341765 | 2002 | 2002 | The Rules of Attraction        | The Rules of Attraction        | Avary, Roger                  | Roger Avary          | tt0292644 |
| 1746520717 | 1925 | 1924 | The Iron Horse                 | The Iron Horse                 | Ford, John                    | John Ford            | tt0015016 |
| 1746570725 | 1934 | 1934 | Let's Try Again                | Let's Try Again                | Miner, Worthington            | Worthington Miner    | tt0025384 |
| 1746573753 | 1957 | 1957 | Chain of Evidence              | Chain of Evidence              | Landres, Paul                 | Paul Landres         | tt0050241 |
| 1746497220 | 1921 | 1921 | The Sign on the Door           | The Sign on the Door           | Brenon, Herbert               | Herbert Brenon       | tt0011692 |
| 1746584528 | 1931 | 1931 | Kept Husbands                  | Kept Husbands                  | Bacon, Lloyd                  | Lloyd Bacon          | tt0022021 |
| 1746573171 | 1932 | 1932 | Hearts of Humanity             | Hearts of Humanity             | Cabanne, Christy              | Christy Cabanne      | tt0022984 |
| 1745302268 | 2007 | 2007 | The Seeker: The Dark Is Rising | The Seeker: The Dark Is Rising | Cunningham, David L.          | David L. Cunningham  | tt0484562 |
| 1746209647 | 1970 | 1970 | Up in the Cellar               | Up in the Cellar               | Flicker, Theodore J.          | Theodore J. Flicker  | tt0066512 |
| 1746583907 | 1929 | 1929 | The Letter                     | The Letter                     | De Limur, Jean                | Jean de Limur        | tt0020092 |
| 1746515596 | 1917 | 1917 | The Volunteer                  | The Volunteer                  | Knoles, Harley                | Harley Knoles        | tt0008743 |
| 1746437578 | 1995 | 1995 | Bushwhacked                    | Bushwhacked                    | Beeman, Greg                  | Greg Beeman          | tt0112602 |
| 1746433689 | 1996 | 1996 | The Crow: City of Angels       | The Crow: City of Angels       | Pope, Tim                     | Tim Pope             | tt0115986 |
| 1745341472 | 2002 | 2002 | The New Guy                    | The New Guy                    | Decter, Ed                    | Ed Decter            | tt0241760 |
| 1746530710 | 1950 | 1950 | Everybody's Dancin'            | Everybody's Dancin'            | Jason, Will                   | Will Jason           | tt0042441 |
| 1746584497 | 1930 | 1930 | With Byrd at the South Pole    | With Byrd at the South Pole    |                               |                      | tt0020594 |
| 1746408914 | 1988 | 1988 | Tequila Sunrise                | Tequila Sunrise                | Towne, Robert                 | Robert Towne         | tt0096244 |
| 1746209081 | 1965 | 1965 | Morituri                       | Morituri                       | Wicki, Bernhard               | Bernhard Wicki       | tt0059470 |
| 1746465054 | 1947 | 1947 | Keeper of the Bees             | Keeper of the Bees             | Sturges, John                 | John Sturges         | tt0039526 |



|            |      |      |                                            |                                           |                               |                        |           |
|------------|------|------|--------------------------------------------|-------------------------------------------|-------------------------------|------------------------|-----------|
| 1746464776 | 1946 | 1946 | Rendezvous with Annie                      | Rendezvous with Annie                     | Dwan, Allan                   | Allan Dwan             | tt0038876 |
| 1746576855 | 1932 | 1932 | Girl of the Rio                            | Girl of the Rio                           | Brenon, Herbert               | Herbert Brenon         | tt0022943 |
| 1746410413 | 1986 | 1986 | Trick or Treat                             | Trick or Treat                            | Smith, Charles Martin         | Charles Martin Smith   | tt0092112 |
| 1746569676 | 1954 | 1954 | Tanganyika                                 | Tanganyika                                | DeToth, Andre                 | André De Toth          | tt0047556 |
| 1746439488 | 1942 | 1942 | The Man Who Came to Dinner                 | The Man Who Came to Dinner                | Keighley, William             | William Keighley       | tt0033874 |
| 1769970560 | 1966 | 1966 | Bad Girls for the Boys                     | Bad Girls for the Boys                    | McGaha, William               | William F. McGaha      | tt0211210 |
| 1746561148 | 1932 | 1932 | Heart Punch                                | The Heart Punch                           | Eason, Breezy                 | B. Reeves Eason        | tt0022982 |
| 1746581923 | 1910 | 1910 | The Indian Scout's Vengeance               | The Indian Scout's Vengeance              |                               | Sidney Olcott          | tt0195836 |
| 1769977810 | 1987 | 1987 | The Garbage Pail Kids Movie                | The Garbage Pail Kids Movie               | Amateau, Rod                  | Rod Amateau            | tt0093072 |
| 1746394510 | 1989 | 1989 | The Abyss                                  | The Abyss                                 | Cameron, James                | James Cameron          | tt0096754 |
| 1746584634 | 1930 | 1930 | Her Unborn Child                           | Her Unborn Child                          | Ray, Albert; McGrath, Charles | Albert Ray             | tt0020967 |
| 1746438518 | 1996 | 1996 | Eraser                                     | Eraser                                    | Russell, Charles              | Chuck Russell          | tt0116213 |
| 1745342044 | 2009 | 2008 | Food, Inc.                                 | Food, Inc.                                | Kenner, Robert                | Robert Kenner          | tt1286537 |
| 1746583763 | 1929 | 1929 | The Wagon Master                           | The Wagon Master                          | Brown, Harry J.               | Harry Joe Brown        | tt0020562 |
| 1746394205 | 1984 | 1984 | Against All Odds                           | Against All Odds                          | Hackford, Taylor              | Taylor Hackford        | tt0086859 |
| 1746571003 | 1934 | 1934 | Stolen Sweets                              | Stolen Sweets                             | Thorpe, Richard               | Richard Thorpe         | tt0025834 |
| 1746562228 | 1954 | 1954 | Casanova's Big Night                       | Casanova's Big Night                      | McLeod, Norman Z.             | Norman Z. McLeod       | tt0046834 |
| 1746438505 | 2000 | 2000 | The Broken Hearts Club - A Romantic Comedy | The Broken Hearts Club: A Romantic Comedy | Berlanti, Greg                | Greg Berlanti          | tt0222850 |
| 1745341870 | 2004 | 2004 | A Dirty Shame                              | A Dirty Shame                             | Waters, John                  | John Waters            | tt0365125 |
| 1746282230 | 1979 | 1979 | The Amityville Horror                      | The Amityville Horror                     | Rosenberg, Stuart             | Stuart Rosenberg       | tt0078767 |
| 1746571452 | 1932 | 1932 | South of Santa Fe                          | South of Santa Fe                         | Glennon, Bert                 | Bert Glennon           | tt0134110 |
| 1746393443 | 1983 | 1983 | Rumble Fish                                | Rumble Fish                               | Coppola, Francis Ford         | Francis Ford Coppola   | tt0086216 |
| 1746569700 | 1953 | 1953 | Safari Drums                               | Safari Drums                              | Beebe, Ford                   | Ford Beebe             | tt0046265 |
| 1746570030 | 1934 | 1934 | Marrying Widows                            | Marrying Widows                           | Newfield, Sam                 | Sam Newfield           | tt0025475 |
| 1769972676 | 1963 | 1963 | Boin--n-g                                  | Boin n g                                  | Gordon, Lewis H.              | Herschell Gordon Lewis | tt0056880 |
| 1746582961 | 1936 | 1936 | Frankie and Johnnie                        | Frankie and Johnnie                       | Erskin, Chester; Auer, John   | Chester Erskine        | tt0027639 |
| 1746393287 | 1987 | 1987 | Beverly Hills Cop II                       | Beverly Hills Cop II                      | Scott, Tony                   | Tony Scott             | tt0092644 |
| 1746583276 | 1931 | 1931 | Big Business Girl                          | Big Business Girl                         | Seiter, William A.            | William A. Seiter      | tt0021657 |
| 1746583272 | 1931 | 1931 | Two Fisted Justice                         | Two Fisted Justice                        | Durlam, G. A.                 | George Arthur Durlam   | tt0022513 |
| 1746436377 | 1943 | 1943 | War Department Report                      | War Department Report                     | Lundquist, Oliver             | Oliver Lundquist       | tt0036512 |
| 1746393705 | 1986 | 1986 | Black Moon Rising                          | Black Moon Rising                         | Cokliss, Harley               | Harley Cokeliss        | tt0090735 |
| 1746561216 | 1932 | 1932 | Big Town                                   | Big Town                                  | Hoerl, Arthur                 | Arthur Hoerl           | tt0022684 |
| 1746553879 | 1964 | 1964 | Country Music Caravan                      | Country Music Caravan                     |                               |                        | tt1032861 |
| 1746577115 | 1963 | 1963 | A Gathering of Eagles                      | A Gathering of Eagles                     | Mann, Delbert                 | Delbert Mann           | tt0057090 |
| 1746208404 | 1969 | 1969 | Riot                                       | Riot                                      | Kulik, Buzz                   | Buzz Kulik             | tt0064895 |
| 1746501749 | 1910 | 1910 | Mike the Housemaid                         | Mike the Housemaid                        |                               |                        | tt0348675 |
| 1746574235 | 1963 | 1963 | Wild Is My Love                            | Wild Is My Love                           | Hilliard, Richard             | Richard Hilliard       | tt0261411 |
| 1746234812 | 1965 | 1965 | Doctor Zhivago                             | Doctor Zhivago                            | Lean, David                   | David Lean             | tt0059113 |
| 1745373189 | 2003 | 2003 | House of 1000 Corpses                      | House of 1000 Corpses                     | Zombie, Rob                   | Rob Zombie             | tt0251736 |
| 1746504426 | 1920 | 1920 | Days of Daring                             | Days of Daring                            |                               | Tom Mix                | tt0006851 |
| 1746394013 | 1984 | 1984 | All of Me                                  | All of Me                                 |                               | Carl Reiner            | tt0086873 |
| 1746438570 | 1997 | 1997 | B. A. P. S.                                | B*A*P*S                                   | Reiner, Carl                  | Carl Reiner            | tt0118663 |
| 1746493550 | 1910 | 1910 | Two Lucky Jims                             | Two Lucky Jims                            | Townsend, Robert              | Robert Townsend        | tt0157025 |
| 1746508721 | 1949 | 1949 | The Joint Is Jumpin'                       | The Joint Is Jumpin'                      | Morris, Sam                   | Frank Beal             | tt1439270 |
| 1769972675 | 1963 | 1963 | Scum of the Earth!                         | Scum of the Earth                         | Binney, Josh                  | Josh Binney            | tt0057480 |
| 1746436233 | 1997 | 1997 | Riding the Rails                           | Riding the Rails                          | Gordon, Lewis H.              | Herschell Gordon Lewis | tt0120017 |
| 1746566169 | 1955 | 1955 | Mau Mau                                    | Mau Mau                                   | Uys, Michael ; Lovell, Lexy   | Lexy Lovell            | tt0042721 |
| 1746561469 | 1932 | 1932 | Honor of the Mounted                       | Honor of the Mounted                      | Price, Elwood G.              | Elwood Price           | tt0023024 |
| 1746501265 | 1910 | 1910 | The Right Girl                             | The Right Girl                            | Fraser, Harry                 | Harry L. Fraser        | tt0201018 |
| 1746550290 | 1954 | 1954 | Garden of Eden                             | Garden of Eden                            |                               | Harry Solter           | tt0047012 |
| 1746578840 | 1951 | 1951 | Ding Dong                                  | Ding Dong                                 | Nosseck, Max                  | Max Nosseck            | tt0276072 |
| 1746581100 | 1910 | 1910 | The Lady and the Burglar                   | The Lady and the Burglar                  | Connell, W. Merle             | W. Merle Connell       | tt0001281 |
| 1746583260 | 1930 | 1930 | The Boudoir Diplomat                       | The Boudoir Diplomat                      |                               | Bannister Merwin       | tt0020704 |
| 1746420375 | 1992 | 1992 | Mom and Dad Save the World                 | Mom and Dad Save the World                | St. Clair, Malcolm            | Malcolm St. Clair      | tt0104905 |
| 1746419594 | 1988 | 1988 | Permanent Record                           | Permanent Record                          | Beeman, Greg                  | Greg Beeman            | tt0095853 |
| 1745395389 | 2010 | 2010 | Happiness Runs                             | Happiness Runs                            | Silver, Marisa                | Marisa Silver          | tt1079964 |
| 1745282650 | 2007 | 2006 | Local Color                                | Local Color                               | Sherman, Adam                 | Adam Sherman           | tt0472126 |
|            |      |      |                                            |                                           | Gallo, George                 | George Gallo           |           |

|            |      |      |                                         |                                         |                                     |                      |           |
|------------|------|------|-----------------------------------------|-----------------------------------------|-------------------------------------|----------------------|-----------|
| 1745293873 | 2005 | 2005 | Unknown White Male                      | Unknown White Male                      | Murray, Rupert                      | Rupert Murray        | tt0436864 |
| 1746408455 | 1989 | 1989 | Staying Together                        | Staying Together                        | Grant, Lee                          | Lee Grant            | tt0098383 |
| 1746197990 | 1969 | 1969 | This Savage Land                        | This Savage Land                        | McEveety, Vincent                   | Vincent McEveety     | tt0065092 |
| 1746211050 | 1972 | 1972 | Superbeast                              | Superbeast                              | Schenck, George; Miner, Allen       | George Schenck       | tt0069331 |
| 1746410426 | 1991 | 1991 | The Ballad of the Sad Cafe              | The Ballad of the Sad Cafe              | Callow, Simon                       | Simon Callow         | tt0101404 |
| 1746393481 | 1986 | 1985 | The Lightship                           | The Lightship                           | Skolimowski, Jerzy                  | Jerzy Skolimowski    | tt0089491 |
| 1746218805 | 1972 | 1972 | Private Parts                           | Private Parts                           | Bartel, Paul                        | Paul Bartel          | tt0069124 |
| 1746455761 | 1999 | 1998 | B. Monkey                               | B. Monkey                               | Radford, Michael                    | Michael Radford      | tt0120594 |
| 1745293976 | 2007 | 2007 | Musician                                | Musician                                | Kraus, Daniel                       | Daniel Kraus         | tt1074646 |
| 1746455034 | 1999 | 1999 | Wing Commander                          | Wing Commander                          | Roberts, Chris                      | Chris Roberts        | tt0131646 |
| 1746453920 | 1995 | 1995 | Smoke                                   | Smoke                                   | Wang, Wayne                         | Wayne Wang           | tt0114478 |
| 1745309144 | 2007 | 2007 | Over the GW                             | Over the GW                             | Gaglia, Nick                        | Nick Gaglia          | tt0920468 |
| 1745341996 | 2003 | 2002 | Cinematica                              | Cinematica                              | Kijak, Stephen ; Christlieb, Angela | Angela Christlieb    | tt0281724 |
| 1746454738 | 1999 | 1999 | Mystery, Alaska                         | Mystery, Alaska                         | Roach, Jay                          | Jay Roach            | tt0134618 |
| 1745309357 | 2005 | 2005 | Capote                                  | Capote                                  | Miller, Bennett                     | Bennett Miller       | tt0379725 |
| 1746421673 | 1995 | 1994 | Martha & Ethel                          | Martha & Ethel                          | Johnstone, Jyll                     | Jyll Johnstone       | tt0110473 |
| 1746410614 | 1986 | 1986 | At Close Range                          | At Close Range                          | Foley, James                        | James Foley          | tt0090670 |
| 1746434920 | 1996 | 1995 | Small Wonders                           | Small Wonders                           | Miller, Alan                        | Allan Miller         | tt0117669 |
| 1745282787 | 2005 | 2004 | Sheriff                                 | Sheriff                                 | Kraus, Daniel                       | Daniel Kraus         | tt0398321 |
| 1746439700 | 1999 | 1999 | Pop & Me                                | Pop & Me                                | Roe, Chris                          | Chris Roe            | tt0196002 |
| 1745372534 | 2004 | 2004 | Uncovered: The War on Iraq              | Uncovered: The War on Iraq              | Greenwald, Robert                   | Robert Greenwald     | tt0420286 |
| 1745342316 | 2009 | 2008 | Uncertainty                             | Uncertainty                             | Siegel, David; McGehee, Scott       | Scott McGehee        | tt1086216 |
| 1746219393 | 1971 | 1971 | Little Murders                          | Little Murders                          | Arkin, Alan                         | Alan Arkin           | tt0067350 |
| 1746218595 | 1974 | 1974 | So Evil My Sister                       | So Evil, My Sister                      | Le Borg, Reginald                   | Reginald Le Borg     | tt0069292 |
| 1746408883 | 1989 | 1989 | See You in the Morning                  | See You in the Morning                  | Pakula, Alan J.                     | Alan J. Pakula       | tt0098283 |
| 1746422636 | 1991 | 1991 | The Five Heartbeats                     | The Five Heartbeats                     | Townsend, Robert                    | Robert Townsend      | tt0101891 |
| 1746393042 | 1983 | 1983 | The Golden Seal                         | The Golden Seal                         | Zuniga, Frank                       | Frank Zuniga         | tt0085608 |
| 1746493805 | 1914 | 1914 | Cocaine Traffic; or, the Drug Terror    | Cocaine Traffic; Or, The Drug Terror    |                                     |                      | tt0003779 |
| 1746504906 | 1918 | 1918 | True Blue                               | True Blue                               | Lloyd, Frank                        | Frank Lloyd          | tt0009726 |
| 1746249897 | 1976 | 1976 | The Food of the Gods                    | The Food of the Gods                    | Gordon, Bert I.                     | Bert I. Gordon       | tt0074540 |
| 1746520537 | 1925 | 1925 | East Lynne                              | East Lynne                              | Flynn, Emmett                       | Emmett J. Flynn      | tt0015775 |
| 1746492423 | 1944 | 1944 | Show Business                           | Show Business                           | Marin, Edwin L.                     | Edwin L. Marin       | tt0037274 |
| 1746584956 | 1939 | 1939 | Danger Flight                           | Danger Flight                           | Bretherton, Howard                  | Howard Bretherton    | tt0031204 |
| 1746198450 | 1968 | 1968 | The Wild, Wild World of Jayne Mansfield | The Wild, Wild World of Jayne Mansfield | Knight, Arthur                      | Charles W. Broun Jr. | tt0063809 |
| 1746570010 | 1958 | 1958 | The Sheepman                            | The Sheepman                            | Marshall, George                    | George Marshall      | tt0052190 |
| 1746393264 | 1987 | 1987 | Can't Buy Me Love                       | Can't Buy Me Love                       | Rash, Steve                         | Steve Rash           | tt0092718 |
| 1745309581 | 2006 | 2006 | The Pink Panther                        | The Pink Panther                        | Levy, Shawn                         | Shawn Levy           | tt0383216 |
| 1746520406 | 1925 | 1925 | Joanna                                  | Joanna                                  | Carewe, Edwin                       | Edwin Carewe         | tt0015960 |
| 1746274130 | 1979 | 1979 | The Black Hole                          | The Black Hole                          | Nelson, Gary                        | Gary Nelson          | tt0078869 |
| 1746572040 | 1932 | 1932 | The Gay Buckaroo                        | The Gay Buckaroo                        | Rosen, Phil                         | Phil Rosen           | tt0022927 |
| 1746410575 | 1982 | 1982 | Airplane II: The Sequel                 | Airplane II: The Sequel                 | Finkleman, Ken                      | Ken Finkleman        | tt0083530 |
| 1745342636 | 2004 | 2004 | Cellular                                | Cellular                                | Ellis, David R.                     | David R. Ellis       | tt0337921 |
| 1745342672 | 2010 | 2010 | Takers                                  | Takers                                  | Luessenhop, John                    | John Luessenhop      | tt1135084 |
| 1746410389 | 1985 | 1985 | White Nights                            | White Nights                            | Hackford, Taylor                    | Taylor Hackford      | tt0090319 |
| 1746438946 | 1945 | 1945 | Having Wonderful Crime                  | Having Wonderful Crime                  | Sutherland, Eddie                   | A. Edward Sutherland | tt0037767 |
| 1746455805 | 1997 | 1997 | Booty Call                              | Booty Call                              | Pollack, Jeff                       | Jeff Pollack         | tt0118750 |
| 1746583688 | 1930 | 1930 | The Fall Guy                            | The Fall Guy                            | Pearce, Leslie                      | Leslie Pearce        | tt0020869 |
| 1746435499 | 1942 | 1942 | Silver Queen                            | Silver Queen                            | Bacon, Lloyd                        | Lloyd Bacon          | tt0035335 |
| 1746393496 | 1983 | 1983 | Screwballs                              | Screwballs                              | Zielinski, Rafal                    | Rafal Zielinski      | tt0086264 |
| 1746580651 | 1935 | 1935 | Rocky Mountain Mystery                  | Rocky Mountain Mystery                  | Barton, Charles                     | Charles Barton       | tt0025939 |
| 1746499883 | 1946 | 1946 | The Mask of Diijon                      | The Mask of Diijon                      | Landers, Lew                        | Lew Landers          | tt0038731 |
| 1746394715 | 1982 | 1982 | E.T.: The Extra-Terrestrial             | E.T. the Extra Terrestrial              | Spielberg, Steven                   | Steven Spielberg     | tt0083866 |
| 1746512581 | 1914 | 1914 | Beneath the Czar                        | Beneath the Czar                        | Blaché, Alice                       | Alice Guy            | tt0003676 |
| 1769969972 | 1912 | 1912 | Fixing a Flirt                          | Fixing a Flirt                          |                                     |                      | tt0359280 |
| 1746576697 | 1910 | 1910 | The Engineer's Romance                  | The Engineer's Romance                  |                                     | Edwin S. Porter      | tt0001198 |
| 1746584362 | 1936 | 1936 | The Story of Louis Pasteur              | The Story of Louis Pasteur              | Dieterle, William                   | William Dieterle     | tt0028313 |
| 1746561625 | 1957 | 1957 | Bop Girl Goes Calypso                   | Bop Girl Goes Calypso                   | Koch, Howard W.                     | Howard W. Koch       | tt0050205 |

|            |      |      |                            |                            |                                |                      |           |
|------------|------|------|----------------------------|----------------------------|--------------------------------|----------------------|-----------|
| 1746561264 | 1932 | 1933 | File 113                   | File 113                   | Franklin, Chester M.           | Chester M. Franklin  | tt0022887 |
| 1746436653 | 1942 | 1942 | To the Shores of Tripoli   | To the Shores of Tripoli   | Humberstone, Bruce             | H. Bruce Humberstone | tt0035447 |
| 1746503411 | 1920 | 1920 | The Silver Horde           | The Silver Horde           | Lloyd, Frank                   | Frank Lloyd          | tt0011695 |
| 1746511746 | 1910 | 1910 | The Winning Punch          | The Winning Punch          |                                | Harry Solter         | tt0201335 |
| 1746508160 | 1948 | 1948 | Renegades of Sonora        | Renegades of Sonora        | Springsteen, R. G.             | R.G. Springsteen     | tt0040728 |
| 1746233752 | 1966 | 1966 | Picture Mommy Dead         | Picture Mommy Dead         | Gordon, Bert I.                | Bert I. Gordon       | tt0060831 |
| 1746250811 | 1977 | 1977 | The Sentinel               | The Sentinel               | Winner, Michael                | Michael Winner       | tt0076683 |
| 1746503465 | 1918 | 1918 | Sporting Life              | Sporting Life              | Tourneur, Maurice              | Maurice Tourneur     | tt0009645 |
| 1746520081 | 1925 | 1925 | The Rattler                | The Battler                | Hurst, Paul                    | Robert N. Bradbury   | tt0355248 |
| 1746569980 | 1959 | 1959 | Here Come the Jets         | Here Come the Jets         | Fowler, Gene                   | Gene Fowler Jr.      | tt0052884 |
| 1745357639 | 2010 | 2010 | Alice in Wonderland        | Alice in Wonderland        | Burton, Tim                    | Tim Burton           | tt1014759 |
| 1746584539 | 1929 | 1929 | The Kiss                   | The Kiss                   | Feyder, Jacques                | Jacques Feyder       | tt0020062 |
| 1746560970 | 1932 | 1932 | Hidden Gold                | Hidden Gold                | Rosson, Arthur                 | Arthur Rosson        | tt0023004 |
| 1746580714 | 1937 | 1937 | Saratoga                   | Saratoga                   | Conway, Jack                   | Jack Conway          | tt0029516 |
| 1746512394 | 1916 | 1916 | Peace at Any Price         | Peace at Any Price         | Drew, Sidney                   | Sidney Drew          | tt0155006 |
| 1746501757 | 1917 | 1917 | Rasputin, the Black Monk   | Rasputin, the Black Monk   | Ashley, Arthur                 | Arthur Ashley        | tt0008496 |
| 1746516308 | 1921 | 1921 | Peck's Bad Boy             | Peck's Bad Boy             | Wood, Sam                      | Sam Wood             | tt0012563 |
| 1745272222 | 2001 | 2001 | American Pie 2             | American Pie 2             | Rogers, J. B.                  | J.B. Rogers          | tt0252866 |
| 1746420116 | 1988 | 1988 | Feds                       | Feds                       | Goldberg, Dan                  | Daniel Goldberg      | tt0095145 |
| 1746571104 | 1933 | 1933 | Cavalcade                  | Cavalcade                  | Lloyd, Frank                   | Frank Lloyd          | tt0023876 |
| 1746581792 | 1930 | 1930 | No, No, Nanette            | No, No, Nanette            | Badger, Clarence               | Clarence G. Badger   | tt0021185 |
| 1746420212 | 1994 | 1993 | Suture                     | Suture                     | McGehee, Scott; Siegel, David  | Scott McGehee        | tt0108260 |
| 1746567743 | 1952 | 1952 | The Last Musketeer         | The Last Musketeer         | Witney, William                | William Witney       | tt0044826 |
| 1746580671 | 1937 | 1937 | Trapped                    | Trapped                    | Barsha, Leon                   | Leon Barsha          | tt0029689 |
| 1746433542 | 1995 | 1994 | Amateur                    | Amateur                    | Hartley, Hal                   | Hal Hartley          | tt0109093 |
| 1746583613 | 1929 | 1929 | Untamed Justice            | Untamed Justice            | Webb, Harry                    | Harry S. Webb        | tt0020539 |
| 1746524440 | 1910 | 1910 | The Maelstrom              | The Maelstrom              |                                | Harry Solter         | tt0200825 |
| 1746581645 | 1910 | 1910 | A Japanese Peach Boy       | A Japanese Peach Boy       | Miller, Ashley                 | Ashley Miller        | tt1492704 |
| 1746433930 | 1991 | 1991 | Slacker                    | Slacker                    | Linklater, Richard             | Richard Linklater    | tt0102943 |
| 1746573305 | 1931 | 1931 | The Pagan Lady             | Pagan Lady                 | Dillon, John Francis           | John Francis Dillon  | tt0022242 |
| 1746394518 | 1993 | 1993 | Airborne                   | Airborne                   | Bowman, Rob                    | Rob Bowman           | tt0106233 |
| 1746408466 | 1985 | 1985 | Secret Admirer             | Secret Admirer             | Greenwalt, David               | David Greenwalt      | tt0089981 |
| 1746503724 | 1921 | 1921 | Finders Keepers            | Finders Keepers            | Thayer, Otis B.                | Otis Thayer          | tt0231588 |
| 1746248529 | 1966 | 1966 | Out of Sight               | Out of Sight               | Weinrib, Lennie                | Lennie Weinrib       | tt0060807 |
| 1746523993 | 1910 | 1910 | Once upon a Time           | Once Upon a Time           |                                | Harry Solter         | tt0200924 |
| 1746423143 | 1940 | 1940 | Manhattan Heartbeat        | Manhattan Heartbeat        | Burton, David                  | David Burton         | tt0032754 |
| 1746566047 | 1956 | 1956 | The Boss                   | The Boss                   | Haskin, Byron                  | Byron Haskin         | tt0049026 |
| 1746211231 | 1973 | 1973 | Lady Ice                   | Lady Ice                   | Gries, Tom                     | Tom Gries            | tt0070284 |
| 1746585262 | 1929 | 1929 | The Vagabond Lover         | The Vagabond Lover         | Neilan, Marshall               | Marshall Neilan      | tt0020542 |
| 1746218300 | 1966 | 1966 | Castle of Evil             | Castle of Evil             | Lyon, Francis D.               | Francis D. Lyon      | tt0060219 |
| 1746199832 | 1967 | 1966 | Outlaw Motorcycles         | Outlaw Motorcycles         | Moody, Titus                   | Titus Moede          | tt0171600 |
| 1746581365 | 1910 | 1910 | In Neighboring Kingdoms    | In Neighboring Kingdoms    | Humphrey, William              | William Humphrey     | tt0001263 |
| 1746513415 | 1923 | 1923 | The Prisoner               | The Prisoner               | Conway, Jack                   | Jack Conway          | tt0014377 |
| 1746582166 | 1930 | 1930 | Renegades                  | Renegades                  | Fleming, Victor                | Victor Fleming       | tt0021295 |
| 1746583449 | 1931 | 1931 | Kiki                       | Kiki                       | Taylor, Sam                    | Sam Taylor           | tt0022026 |
| 1746523975 | 1916 | 1916 | Idle Wives                 | Idle Wives                 | Weber, Lois; Smalley, Phillips | Phillips Smalley     | tt0006846 |
| 1746454295 | 1999 | 1999 | Bringing Out the Dead      | Bringing Out the Dead      | Scorsese, Martin               | Martin Scorsese      | tt0163988 |
| 1746577456 | 1950 | 1950 | West of Wyoming            | West of Wyoming            | Fox, Wallace W.                | Wallace Fox          | tt0043124 |
| 1746408452 | 1986 | 1985 | Legend                     | Legend                     | Scott, Ridley                  | Ridley Scott         | tt0089469 |
| 1746573874 | 1958 | 1958 | Hot Car Girl               | Hot Car Girl               | Kowalski, Bernard L.           | Bernard L. Kowalski  | tt0180746 |
| 1746570430 | 1933 | 1933 | When a Man Rides Alone     | When a Man Rides Alone     | McGowan, J. P.                 | J.P. McGowan         | tt0024766 |
| 1746503957 | 1919 | 1919 | The Delicious Little Devil | The Delicious Little Devil | Leonard, Robert Z.             | Robert Z. Leonard    | tt0010060 |
| 1746514314 | 1910 | 1910 | The Stolen Claim           | The Stolen Claim           |                                | Edwin S. Porter      | tt0330935 |
| 1746583278 | 1930 | 1929 | Hurricane                  | Hurricane                  | Ince, Ralph                    | Ralph Ince           | tt0020992 |
| 1746561103 | 1932 | 1932 | Human Targets              | Human Targets              | McGowan, J. P.                 | J.P. McGowan         | tt0023035 |
| 1746495827 | 1918 | 1918 | The Strange Woman          | The Strange Woman          | Le Saint, Edward J.            | Edward LeSaint       | tt0009658 |
| 1746465158 | 1944 | 1944 | Trigger Law                | Trigger Law                | Keays, Vernon                  | Vernon Keays         | tt0037397 |

|            |      |      |                                 |                                 |                              |                                     |           |
|------------|------|------|---------------------------------|---------------------------------|------------------------------|-------------------------------------|-----------|
| 1746555109 | 1954 | 1954 | The High and the Mighty         | The High and the Mighty         | Wellman, William A.          | William A. Wellman                  | tt0047086 |
| 1746439429 | 1996 | 1996 | 101 Dalmatians                  | 101 Dalmatians                  | Herek, Stephen               | Stephen Herek                       | tt0115433 |
| 1746509236 | 1927 | 1927 | Three's a Crowd                 | Three's a Crowd                 | Langdon, Harry               | Harry Langdon                       | tt0018484 |
| 1746554172 | 1965 | 1965 | Forty Acre Feud                 | Forty Acre Feud                 | Ormond, Ron                  | Ron Ormond                          | tt0173860 |
| 1746583528 | 1930 | 1929 | Border Romance                  | Border Romance                  | Thorpe, Richard              | Richard Thorpe                      | tt0019711 |
| 1769970786 | 1912 | 1912 | Broncho Billy and the Girl      | Broncho Billy and the Girl      | Anderson, G. M.              | Gilbert M. 'Broncho Billy' Anderson | tt0375626 |
| 1746434381 | 1998 | 1997 | Wild Man Blues                  | Wild Man Blues                  | Kopple, Barbara              | Barbara Kopple                      | tt0141986 |
| 1746577160 | 1962 | 1962 | Birdman of Alcatraz             | Birdman of Alcatraz             | Frankenheimer, John          | John Frankenheimer                  | tt0055798 |
| 1746435007 | 1997 | 1997 | Touch                           | Touch                           | Schrader, Paul               | Paul Schrader                       | tt0120357 |
| 1746216996 | 1966 | 1966 | The Group                       | The Group                       | Lumet, Sidney                | Sidney Lumet                        | tt0060479 |
| 1745342826 | 2009 | 2009 | The Informant!                  | The Informant!                  | Soderbergh, Steven           | Steven Soderbergh                   | tt1130080 |
| 1746454921 | 1997 | 1997 | Afterglow                       | Afterglow                       | Rudolph, Alan                | Alan Rudolph                        | tt0118566 |
| 1745340938 | 2002 | 2002 | The Hours                       | The Hours                       | Daltry, Stephen              | Stephen Daltry                      | tt0274558 |
| 1746465345 | 1946 | 1946 | The Face of Marble              | The Face of Marble              | Beaudine, William            | William Beaudine                    | tt0038514 |
| 1746474988 | 1947 | 1947 | Ghost Town Renegades            | Ghost Town Renegades            | Taylor, Ray                  | Ray Taylor                          | tt0039419 |
| 1746454608 | 1944 | 1944 | The Monster Maker               | The Monster Maker               | Newfield, Sam                | Sam Newfield                        | tt0037084 |
| 1746580727 | 1935 | 1935 | The People's Enemy              | The People's Enemy              | Wilbur, Crane                | Crane Wilbur                        | tt0026861 |
| 1745339940 | 2001 | 2001 | 15 Minutes                      | 15 Minutes                      | Herzfeld, John               | John Herzfeld                       | tt0179626 |
| 1746421702 | 1997 | 1996 | Blood and Wine                  | Blood and Wine                  | Rafelson, Bob                | Bob Rafelson                        | tt0115710 |
| 1746511797 | 1910 | 1910 | Perils of the Plains            | Perils of the Plains            |                              | Fred J. Balshofer                   | tt0358634 |
| 1769977812 | 1983 | 1983 | Joysticks                       | Joysticks                       | Clark, Greydon               | Greydon Clark                       | tt0085764 |
| 1746566085 | 1953 | 1953 | The Flaming Urge                | The Flaming Urge                | Ericson, Harold              | Harold Ericson                      | tt0045772 |
| 1746581741 | 1910 | 1910 | The Indian Girl's Romance       | The Indian Girl's Romance       |                              |                                     | tt1809371 |
| 1746500327 | 1927 | 1926 | The Moving Guest                | Moving Guests                   |                              | Bobby Ray                           | tt0018177 |
| 1746491879 | 1944 | 1944 | Spook Town                      | Spook Town                      | Clifton, Elmer               | Elmer Clifton                       | tt0037304 |
| 1746422170 | 1999 | 1999 | Idle Hands                      | Idle Hands                      | Flender, Rodman              | Rodman Flender                      | tt0138510 |
| 1746574547 | 1933 | 1934 | As Husbands Go                  | As Husbands Go                  | MacFadden, Hamilton          | Hamilton MacFadden                  | tt0024841 |
| 1746583648 | 1930 | 1930 | Romance of the West             | Romance of the West             | Tansey, Robert; Tansey, John | John Tansey                         | tt0021311 |
| 1746566164 | 1953 | 1953 | On Top of Old Smoky             | On Top of Old Smoky             | Archainbaud, George          | George Archainbaud                  | tt0046141 |
| 1746574137 | 1961 | 1961 | A Matter of Morals              | A Matter of Morals              | Cromwell, John               | John Cromwell                       | tt0055155 |
| 1746574063 | 1959 | 1959 | Don't Give Up the Ship          | Don't Give Up the Ship          | Taurog, Norman               | Norman Taurog                       | tt0052749 |
| 1746454075 | 1941 | 1941 | The Lone Rider Fights Back      | The Lone Rider Fights Back      | Newfield, Sam                | Sam Newfield                        | tt0033843 |
| 1746424552 | 1942 | 1942 | A Yank in Libya                 | A Yank in Libya                 | Herman, Albert               | Albert Herman                       | tt0035573 |
| 1746581311 | 1963 | 1962 | The World's Greatest Sinner     | The World's Greatest Sinner     | Carey, Timothy               | Timothy Carey                       | tt0056703 |
| 1746409811 | 1988 | 1988 | Bloodsport                      | Bloodsport                      | Arnold, Newt                 | Newt Arnold                         | tt0092675 |
| 1746513037 | 1922 | 1922 | The Impossible Mrs. Bellew      | The Impossible Mrs. Bellew      | Wood, Sam                    | Sam Wood                            | tt0013264 |
| 1746408682 | 1986 | 1986 | The Boy Who Could Fly           | The Boy Who Could Fly           | Castle, Nick                 | Nick Castle                         | tt0090768 |
| 1746578909 | 1962 | 1962 | Lolita                          | Lolita                          | Kubrick, Stanley             | Stanley Kubrick                     | tt0056193 |
| 1746583615 | 1929 | 1929 | Sunset Pass                     | Sunset Pass                     | Brower, Otto                 | Otto Brower                         | tt0020467 |
| 1745374034 | 2009 | 2009 | Notorious                       | Notorious                       | Tillman, George              | George Tillman Jr.                  | tt0472198 |
| 1746585372 | 1939 | 1939 | Secret Service of the Air       | Secret Service of the Air       | Smith, Noel                  | Noel M. Smith                       | tt0031908 |
| 1745373091 | 2001 | 2001 | Crocodile Dundee in Los Angeles | Crocodile Dundee in Los Angeles | Wincer, Simon                | Simon Wincer                        | tt0231402 |
| 1746394155 | 1993 | 1993 | Carnosaur                       | Carnosaur                       | Simon, Adam                  | Adam Simon                          | tt0106521 |
| 1745309628 | 2007 | 2007 | In the Land of Women            | In the Land of Women            | Kasdan, Jonathan             | Jon Kasdan                          | tt0419843 |
| 1746434596 | 1999 | 1999 | Happy, Texas                    | Happy, Texas                    | Illsley, Mark                | Mark Illsley                        | tt0162360 |
| 1746433781 | 1998 | 1998 | Kissing a Fool                  | Kissing a Fool                  | Ellin, Doug                  | Doug Ellin                          | tt0120723 |
| 1746578559 | 1959 | 1959 | Count Your Blessings            | Count Your Blessings            | Negulesco, Jean              | Jean Negulesco                      | tt0052706 |
| 1746581849 | 1929 | 1929 | Below the Deadline              | Below the Deadline              | McGowan, J. P.               | J.P. McGowan                        | tt0019685 |
| 1746583699 | 1929 | 1929 | One Splendid Hour               | One Splendid Hour               | King, Burton                 | Cliff Wheeler                       | tt0020242 |
| 1746570366 | 1933 | 1933 | Galloping Romeo                 | Galloping Romeo                 | Bradbury, Robert N.          | Robert N. Bradbury                  | tt0024047 |
| 1746234464 | 1967 | 1967 | Mondo Hollywood                 | Mondo Hollywood                 | Cohen, Robert Carl           | Robert Carl Cohen                   | tt0061988 |
| 1746514859 | 1927 | 1927 | Eyes of the Totem               | The Eyes of the Totem           | Van Dyke, W. S.              | W.S. Van Dyke                       | tt0017858 |
| 1746209221 | 1967 | 1967 | Track of Thunder                | Track of Thunder                | Kane, Joe                    | Joseph Kane                         | tt0063710 |
| 1769971904 | 1969 | 1969 | Guess Who's Coming?             | Guess Who's Coming?             | Hais, Jai                    | Jai Hais                            | tt0219722 |
| 1746566092 | 1957 | 1957 | Gunfire at Indian Gap           | Gunfire at Indian Gap           | Kane, Joe                    | Joseph Kane                         | tt0051689 |
| 1746509051 | 1926 | 1926 | Ahead of the Law                | Ahead of the Law                | Sheldon, Forrest             | Forrest Sheldon                     | tt0016578 |
| 1746582698 | 1938 | 1938 | In Old Mexico                   | In Old Mexico                   | Venturini, Edward D.         | Edward D. Venturini                 | tt0030270 |

|            |      |      |                                              |                                                    |                              |                                     |           |
|------------|------|------|----------------------------------------------|----------------------------------------------------|------------------------------|-------------------------------------|-----------|
| 1769970030 | 1911 | 1911 | Three Daughters of the West                  | Three Daughters of the West                        | Dwan, Allan                  | Allan Dwan                          | tt0467053 |
| 1746582418 | 1938 | 1938 | The Goldwyn Follies                          | The Goldwyn Follies                                | Marshall, George             | George Marshall                     | tt0030194 |
| 1746574286 | 1963 | 1963 | The Young Racers                             | The Young Racers                                   | Corman, Roger                | Roger Corman                        | tt0057706 |
| 1746573021 | 1931 | 1931 | Shotgun Pass                                 | Shotgun Pass                                       | McGowan, J. P.               | J.P. McGowan                        | tt0022379 |
| 1746561092 | 1932 | 1933 | The Intruder                                 | The Intruder                                       | Ray, Albert                  | Albert Ray                          | tt0023064 |
| 1746235292 | 1971 | 1971 | Quadroon                                     | Quadroon                                           | Weiss, Jack                  | Jack Weiss                          | tt0069138 |
| 1746494020 | 1910 | 1910 | Gotch-Zbyszko World's Championship Wrestling | Gotch Zbyszko World's Championship Wrestling Match |                              |                                     | tt1397177 |
| 1746500138 | 1949 | 1948 | You Gotta Stay Happy                         | You Gotta Stay Happy                               | Potter, H. C.                | H.C. Potter                         | tt0040982 |
| 1746509305 | 1949 | 1949 | Flamingo Road                                | Flamingo Road                                      | Curtiz, Michael              | Michael Curtiz                      | tt0041373 |
| 1746508402 | 1924 | 1924 | The Breaking Point                           | The Breaking Point                                 | Brenon, Herbert              | Herbert Brenon                      | tt0014738 |
| 1746500946 | 1910 | 1910 | Red Wing's Constancy                         | Red Wing's Constancy                               |                              | Fred J. Balshofer                   | tt0359887 |
| 1746576523 | 1932 | 1932 | Police Court                                 | Police Court                                       | King, Louis                  | Louis King                          | tt0023347 |
| 1746208906 | 1966 | 1966 | The Fortune Cookie                           | The Fortune Cookie                                 | Wilder, Billy                | Billy Wilder                        | tt0060424 |
| 1746421311 | 1998 | 1998 | Home Fries                                   | Home Fries                                         | Parisot, Dean                | Dean Parisot                        | tt0119304 |
| 1746582260 | 1931 | 1931 | Riders of the Cactus                         | Riders of the Cactus                               | Kirkland, David              | David Kirkland                      | tt0022312 |
| 1746200026 | 1967 | 1967 | Wait Until Dark                              | Wait Until Dark                                    | Young, Terence               | Terence Young                       | tt0062467 |
| 1746583607 | 1930 | 1930 | Derelict                                     | Derelict                                           | Lee, Rowland V.              | Rowland V. Lee                      | tt0020819 |
| 1746473910 | 1945 | 1944 | Wilson                                       | Wilson                                             | King, Henry                  | Henry King                          | tt0037465 |
| 1746437426 | 1942 | 1942 | The Glass Key                                | The Glass Key                                      | Heisler, Stuart              | Stuart Heisler                      | tt0034798 |
| 1746580779 | 1937 | 1937 | Annapolis Salute                             | Annapolis Salute                                   | Cabanne, Christy             | Christy Cabanne                     | tt0028578 |
| 1746497580 | 1922 | 1922 | Alias Julius Caesar                          | Alias Julius Caesar                                | Ray, Charles                 | Charles Ray                         | tt0012886 |
| 1746465215 | 1942 | 1942 | SOS Coast Guard                              | SOS Coast Guard                                    | Witney, William; James, Alan | Alan James                          | tt0035276 |
| 1746183304 | 1910 | 1910 | The Bandit's Wife                            | The Bandit's Wife                                  | Anderson, G. M.              | Gilbert M. 'Broncho Billy' Anderson | tt0001128 |
| 1746492412 | 1947 | 1947 | Sport of Kings                               | Sport of Kings                                     | Gordon, Robert               | Robert Gordon                       | tt0039860 |
| 1746502822 | 1915 | 1915 | The Dust of Egypt                            | The Dust of Egypt                                  | Baker, George D.             | George D. Baker                     | tt0005232 |
| 1746574116 | 1959 | 1959 | Have Rocket--Will Travel                     | Have Rocket Will Travel                            | Rich, David Lowell           | David Lowell Rich                   | tt0052880 |
| 1746422514 | 1990 | 1990 | Joe Versus the Volcano                       | Joe Versus the Volcano                             | Shanley, John Patrick        | John Patrick Shanley                | tt0099892 |
| 1746465027 | 1947 | 1947 | Blonde Savage                                | Blonde Savage                                      | Seeley, S. K.                | Steve Sekely                        | tt0039198 |
| 1745272289 | 2000 | 2000 | Shanghai Noon                                | Shanghai Noon                                      | Dey, Tom                     | Tom Dey                             | tt0184894 |
| 1746585244 | 1929 | 1929 | Stark Mad                                    | Stark Mad                                          | Bacon, Lloyd                 | Lloyd Bacon                         | tt0020449 |
| 1746581702 | 1928 | 1928 | Walking Back                                 | Walking Back                                       | Julian, Rupert               | Rupert Julian                       | tt0019544 |
| 1746520780 | 1949 | 1949 | South of Death Valley                        | South of Death Valley                              | Nazarro, Ray                 | Ray Nazarro                         | tt0041905 |
| 1746565293 | 1932 | 1932 | Wayward                                      | Wayward                                            | Sloman, Edward               | Edward Sloman                       | tt0023675 |
| 1746582723 | 1938 | 1937 | Rough Riding Rhythm                          | Rough Riding Rhythm                                | McGowan, J. P.               | J.P. McGowan                        | tt0029500 |
| 1746533226 | 1914 | 1914 | The Seats of the Mighty                      | The Seats of the Mighty                            | Hunter, T. Hays              | T. Hayes Hunter                     | tt0004567 |
| 1746567598 | 1932 | 1932 | The Wet Parade                               | The Wet Parade                                     | Fleming, Victor              | Victor Fleming                      | tt0023685 |
| 1746503946 | 1918 | 1918 | The Greatest Thing in Life                   | The Greatest Thing in Life                         | Griffith, D. W.              | D.W. Griffith                       | tt0009133 |
| 1746493771 | 1910 | 1910 | Old Heads and Young Hearts                   | Old Heads and Young Hearts                         |                              | Harry Solter                        | tt0200919 |
| 1746572116 | 1910 | 1910 | Electric Insoles                             | Electric Insoles                                   |                              | Gilbert M. 'Broncho Billy' Anderson | tt0372255 |
| 1746419573 | 1983 | 1983 | Richard Pryor... Here and Now                | Richard Pryor... Here and Now                      | Pryor, Richard               | Richard Pryor                       | tt0086194 |
| 1746585413 | 1940 | 1940 | Swiss Family Robinson                        | Swiss Family Robinson                              | Ludwig, Edward               | Edward Ludwig                       | tt0033124 |
| 1746555862 | 1956 | 1956 | Pardners                                     | Pardners                                           | Taurog, Norman               | Norman Taurog                       | tt0049593 |
| 1746561125 | 1932 | 1932 | The Night Mayor                              | The Night Mayor                                    | Stoloff, Ben                 | Benjamin Stoloff                    | tt0023269 |
| 1769971162 | 1969 | 1969 | Career Bed                                   | Career Bed                                         | Reed, Joel M.                | Joel M. Reed                        | tt0123633 |
| 1746394231 | 1983 | 1983 | The Outsiders                                | The Outsiders                                      | Coppola, Francis Ford        | Francis Ford Coppola                | tt0086066 |
| 1746410391 | 1984 | 1984 | Purple Rain                                  | Purple Rain                                        | Magnoli, Albert              | Albert Magnoli                      | tt0087957 |
| 1746455089 | 2000 | 2000 | Bamboozled                                   | Bamboozled                                         | Lee, Spike                   | Spike Lee                           | tt0215545 |
| 1746440307 | 1998 | 1998 | What Dreams May Come                         | What Dreams May Come                               | Ward, Vincent                | Vincent Ward                        | tt0120889 |
| 1746567247 | 1953 | 1953 | Target Hong Kong                             | Target Hong Kong                                   | Sears, Fred F.               | Fred F. Sears                       | tt0045219 |
| 1769970020 | 1911 | 1911 | Cowgirls' Pranks                             | Cowgirls' Pranks                                   |                              | Thomas H. Ince                      | tt0312587 |
| 1746409305 | 1985 | 1985 | Ladyhawke                                    | Ladyhawke                                          | Donner, Richard              | Richard Donner                      | tt0089457 |
| 1746424247 | 1942 | 1942 | Law of the Jungle                            | Law of the Jungle                                  | Yarbrough, Jean              | Jean Yarbrough                      | tt0034968 |
| 1746436193 | 1997 | 1997 | Air Force One                                | Air Force One                                      | Petersen, Wolfgang           | Wolfgang Petersen                   | tt0118571 |
| 1746566283 | 1955 | 1955 | Kiss Me Deadly                               | Kiss Me Deadly                                     | Aldrich, Robert              | Robert Aldrich                      | tt0048261 |
| 1746574659 | 1933 | 1933 | Bombshell                                    | Bombshell                                          | Fleming, Victor              | Victor Fleming                      | tt0023825 |
| 1746421058 | 1987 | 1987 | Russkies                                     | Russkies                                           | Rosenthal, Rick              | Rick Rosenthal                      | tt0093898 |
| 1746512917 | 1915 | 1915 | The Unfinished Portrait                      | The Unfinished Portrait                            | Le Saint, Edward J.          | Edward LeSaint                      | tt1261962 |

|            |      |      |                                              |                                              |                                     |                           |           |
|------------|------|------|----------------------------------------------|----------------------------------------------|-------------------------------------|---------------------------|-----------|
| 1746582271 | 1928 | 1928 | The Perfect Crime                            | The Perfect Crime                            | Glennon, Bert                       | Bert Glennon              | tt0019264 |
| 1746583457 | 1951 | 1951 | Pecos River                                  | Pecos River                                  | Sears, Fred F.                      | Fred F. Sears             | tt0043911 |
| 1746524243 | 1914 | 1914 | Even unto Death                              | Even Unto Death                              |                                     | Gilbert P. Hamilton       | tt0003893 |
| 1746484186 | 1919 | 1919 | One Against Many                             | One Against Many                             | Jones, Edgar                        | Edgar Jones               | tt0010524 |
| 1746394536 | 1982 | 1982 | Halloween III Season of the Witch            | Halloween III: Season of the Witch           | Wallace, Tommy Lee                  | Tommy Lee Wallace         | tt0085636 |
| 1746250939 | 1976 | 1976 | Brotherhood of Death                         | Brotherhood of Death                         | Berry, Bill                         | Bill Berry                | tt0207359 |
| 1746393150 | 1982 | 1982 | Cannery Row                                  | Cannery Row                                  | Ward, David S.                      | David S. Ward             | tt0083717 |
| 1745372514 | 2009 | 2009 | Invictus                                     | Invictus                                     | Eastwood, Clint                     | Clint Eastwood            | tt1057500 |
| 1746585344 | 1929 | 1929 | Midstream                                    | Midstream                                    | Flood, James                        | James Flood               | tt0020171 |
| 1745342010 | 2008 | 2007 | Everybody Wants to Be Italian                | Everybody Wants to Be Italian                | Ipson, Jason Todd                   | Jason Todd Ipson          | tt0790657 |
| 1746578772 | 1950 | 1950 | Mystery Street                               | Mystery Street                               | Sturges, John                       | John Sturges              | tt0042771 |
| 1746583387 | 1951 | 1951 | Ace in the Hole                              | Ace in the Hole                              | Wilder, Billy                       | Billy Wilder              | tt0043338 |
| 1745358650 | 2008 | 2008 | Revolutionary Road                           | Revolutionary Road                           | Mendes, Sam                         | Sam Mendes                | tt0959337 |
| 1746248985 | 1976 | 1976 | Two-Minute Warning                           | Two Minute Warning                           | Peerce, Larry                       | Larry Peerce              | tt0075359 |
| 1746198107 | 1969 | 1969 | The Undeclared                               | The Undeclared                               | McLaglen, Andrew V.                 | Andrew V. McLaglen        | tt0065150 |
| 1746422283 | 1996 | 1996 | The Whole Wide World                         | The Whole Wide World                         | Ireland, Dan                        | Dan Ireland               | tt0118163 |
| 1745340309 | 2002 | 2002 | Eight Legged Freaks                          | Eight Legged Freaks                          | Elkayem, Ellory                     | Ellory Elkayem            | tt0271367 |
| 1745302612 | 2005 | 2005 | The Kid & I                                  | The Kid & I                                  | Spheeris, Penelope                  | Penelope Spheeris         | tt0416891 |
| 1745358051 | 2010 | 2010 | Death at a Funeral                           | Death at a Funeral                           | LaBute, Neil                        | Neil LaBute               | tt1321509 |
| 1746575068 | 1933 | 1933 | The Mayor of Hell                            | The Mayor of Hell                            | Mayo, Archie                        | Archie Mayo               | tt0024314 |
| 1745372535 | 2003 | 2003 | Legally Blonde 2: Red, White and Blonde      | Legally Blonde 2: Red, White & Blonde        | Herman-Wurmfeld, Charles            | Charles Herman            | tt0333780 |
| 1745358913 | 2003 | 2003 | Charlie's Angels: Full Throttle              | Charlie's Angels: Full Throttle              | McG                                 | McG                       | tt0305357 |
| 1746423277 | 1999 | 1999 | Deep Blue Sea                                | Deep Blue Sea                                | Harlin, Renny                       | Renny Harlin              | tt0149261 |
| 1746465232 | 1946 | 1946 | Undercurrent                                 | Undercurrent                                 | Minnelli, Vincente                  | Vincente Minnelli         | tt0039066 |
| 1746421700 | 1994 | 1994 | City Slickers II: The Legend of Curly's Gold | City Slickers II: The Legend of Curly's Gold | Weiland, Paul                       | Paul Weiland              | tt0109439 |
| 1746218796 | 1976 | 1976 | Won Ton Ton, The Dog Who Saved Hollywood     | Won Ton Ton: The Dog Who Saved Hollywood     | Winner, Michael                     | Michael Winner            | tt0075436 |
| 1746492058 | 1944 | 1944 | The Story of Dr. Wassell                     | The Story of Dr. Wassell                     | DeMille, Cecil B.                   | Cecil B. DeMille          | tt0037316 |
| 1746435359 | 1998 | 1998 | Smoke Signals                                | Smoke Signals                                | Eyre, Chris                         | Chris Eyre                | tt0120321 |
| 1746453986 | 1998 | 1998 | The Negotiator                               | The Negotiator                               | Gray, F. Gary                       | F. Gary Gray              | tt0120768 |
| 1746251272 | 1976 | 1976 | Silver Streak                                | Silver Streak                                | Hiller, Arthur                      | Arthur Hiller             | tt0075223 |
| 1746584406 | 1939 | 1939 | Drums Along the Mohawk                       | Drums Along the Mohawk                       | Ford, John                          | John Ford                 | tt0031252 |
| 1746433774 | 1992 | 1992 | Alien 3                                      | Alien³                                       | Fincher, David                      | David Fincher             | tt0103644 |
| 1746409104 | 1990 | 1990 | White Hunter, Black Heart                    | White Hunter Black Heart                     | Eastwood, Clint                     | Clint Eastwood            | tt0100928 |
| 1746393532 | 1985 | 1985 | After Hours                                  | After Hours                                  | Scorsese, Martin                    | Martin Scorsese           | tt0088680 |
| 1746251346 | 1980 | 1980 | Airplane!                                    | Airplane!                                    | Abrahams, Jim; Zucker, David; Zucke | Jim Abrahams              | tt0080339 |
| 1745293267 | 2006 | 2006 | Aquamarine                                   | Aquamarine                                   | Allen, Elizabeth                    | Elizabeth Allen Rosenbaum | tt0429591 |
| 1746436241 | 1998 | 1998 | Clay Pigeons                                 | Clay Pigeons                                 | Dobkin, David                       | David Dobkin              | tt0118863 |
| 1746410589 | 1984 | 1984 | Dune                                         | Dune                                         | Lynch, David                        | David Lynch               | tt0087182 |
| 1746419160 | 1987 | 1987 | The Squeeze                                  | The Squeeze                                  | Young, Roger                        | Roger Young               | tt0094021 |
| 1746437146 | 1999 | 1998 | I'm Losing You                               | I'm Losing You                               | Wagner, Bruce                       | Bruce Wagner              | tt0142393 |
| 1746420246 | 1986 | 1986 | Fire with Fire                               | Fire with Fire                               | Gibbins, Duncan                     | Duncan Gibbins            | tt0091053 |
| 1746512141 | 1910 | 1910 | The Music Teacher                            | The Music Teacher                            |                                     | Joseph A. Golden          | tt0338271 |
| 1746553935 | 1963 | 1963 | The Wheeler Dealers                          | The Wheeler Dealers                          | Hiller, Arthur                      | Arthur Hiller             | tt0057681 |
| 1746562041 | 1953 | 1953 | I Love Melvin                                | I Love Melvin                                | Weis, Don                           | Don Weis                  | tt0045899 |
| 1746233578 | 1967 | 1967 | In Like Flint                                | In Like Flint                                | Douglas, Gordon                     | Gordon Douglas            | tt0061810 |
| 1746218423 | 1967 | 1967 | Bed of Violence                              | Bed of Violence                              | Sarno, Joe                          | Joseph W. Sarno           | tt0060156 |
| 1746575391 | 1932 | 1932 | Midnight Warning                             | The Midnight Warning                         | Bennett, Spencer Gordon             | Spencer Gordon Bennet     | tt0023221 |
| 1769969936 | 1911 | 1911 | Tony and the Stork                           | Tony and the Stork                           | Ince, Thomas H.                     | Thomas H. Ince            | tt0358734 |
| 1746571354 | 1933 | 1933 | A Shriek in the Night                        | A Shriek in the Night                        | Ray, Albert                         | Albert Ray                | tt0024554 |
| 1746436575 | 1941 | 1941 | Unfinished Business                          | Unfinished Business                          | LaCava, Gregory                     | Gregory La Cava           | tt0034340 |
| 1746570389 | 1934 | 1934 | The Boss Cowboy                              | Boss Cowboy                                  | Adamson, Victor                     | Victor Adamson            | tt0131982 |
| 1746575075 | 1933 | 1933 | Her Forgotten Past                           | Her Forgotten Past                           | Ford, Wesley                        | Wesley Ford               | tt0024110 |
| 1745342788 | 2010 | 2010 | The Last Exorcism                            | The Last Exorcism                            | Stamm, Daniel                       | Daniel Stamm              | tt1320244 |
| 1745309711 | 2006 | 2006 | The Return                                   | The Return                                   | Kapadia, Asif                       | Asif Kapadia              | tt0433442 |
| 1746581835 | 1930 | 1930 | Road to Paradise                             | Road to Paradise                             | Beaudine, William                   | William Beaudine          | tt0021304 |
| 1745282674 | 2005 | 2005 | Walk the Line                                | Walk the Line                                | Mangold, James                      | James Mangold             | tt0358273 |
| 1745293791 | 2005 | 2004 | D.E.B.S.                                     | D.E.B.S.                                     | Robinson, Angela                    | Angela Robinson           | tt0367631 |

|                   |             |             |                                     |                                     |                                  |                         |                  |
|-------------------|-------------|-------------|-------------------------------------|-------------------------------------|----------------------------------|-------------------------|------------------|
| 1745358878        | 2010        | 2010        | Burlesque                           | Burlesque                           | Antin, Steven                    | Steve Antin             | tt1126591        |
| 1746565975        | 1954        | 1954        | The Bowery Boys Meet the Monsters   | The Bowery Boys Meet the Monsters   | Bernds, Edward                   | Edward Berndt           | tt0046802        |
| 1746409735        | 1986        | 1986        | Top Gun                             | Top Gun                             | Scott, Tony                      | Tony Scott              | tt0092099        |
| 1745302255        | 2006        | 2006        | Off the Black                       | Off the Black                       | Ponsoldt , James                 | James Ponsoldt          | tt0479965        |
| 1745341462        | 2002        | 2001        | Jason X                             | Jason X                             | Isaac, Jim                       | James Isaac             | tt0211443        |
| 1746392809        | 1981        | 1981        | Zorro, The Gay Blade                | Zorro: The Gay Blade                | Medak, Peter                     | Peter Medak             | tt0083366        |
| 1746249244        | 1976        | 1976        | The Killing of a Chinese Bookie     | The Killing of a Chinese Bookie     | Cassavetes, John                 | John Cassavetes         | tt0074749        |
| <b>1746581758</b> | <b>1910</b> | <b>1910</b> | <b>His First Valentine</b>          | <b>His First Valentine</b>          |                                  | <b>J. Searle Dawley</b> | <b>tt1492875</b> |
| 1746542658        | 1926        | 1926        | Thundering Speed                    | Thundering Speed                    | Neitz, Alvin J.                  | Alan James              | tt0170688        |
| 1746410570        | 1986        | 1986        | Spacecamp                           | SpaceCamp                           | Winer, Harry                     | Harry Winer             | tt0091993        |
| 1746503330        | 1920        | 1920        | Dangerous Business                  | Dangerous Business                  | Neill, R. William                | Roy William Neill       | tt0011090        |
| 1746515815        | 1920        | 1920        | Two Moons                           | Two Moons                           | LeSaint, Edward J.               | Edward LeSaint          | tt0011799        |
| 1746218695        | 1974        | 1974        | Bring Me the Head of Alfredo Garcia | Bring Me the Head of Alfredo Garcia | Peckinpah, Sam                   | Sam Peckinpah           | tt0071249        |
| 1746565207        | 1932        | 1932        | Man About Town                      | Man About Town                      | Dillon, John Francis             | John Francis Dillon     | tt0023177        |
| 1769969470        | 1965        | 1965        | Lust and the Flesh                  | Lust and the Flesh                  | Orlando, Tony                    | Tony Orlando            | tt0213066        |
| 1746560802        | 1932        | 1932        | Slightly Married                    | Slightly Married                    | Thorpe, Richard                  | Richard Thorpe          | tt0156085        |
| 1746520487        | 1948        | 1948        | Test Tube Babies                    | Test Tube Babies                    | Connell, W. Merle                | W. Merle Connell        | tt0046416        |
| 1746567929        | 1932        | 1932        | The Stoker                          | The Stoker                          | Franklin, Chester M.             | Chester M. Franklin     | tt0023512        |
| 1746453806        | 1942        | 1941        | Babes on Broadway                   | Babes on Broadway                   | Berkeley, Busby                  | Busby Berkeley          | tt0034485        |
| 1746454298        | 1999        | 1999        | Stir of Echoes                      | Stir of Echoes                      | Koeppe, David                    | David Koeppe            | tt0164181        |
| 1746454280        | 1943        | 1943        | Nearly Eighteen                     | Nearly Eighteen                     | Dreifuss, Arthur                 | Arthur Dreifuss         | tt0036198        |
| 1746454021        | 1943        | 1943        | Days of Old Cheyenne                | Days of Old Cheyenne                | Clifton, Elmer                   | Elmer Clifton           | tt0035782        |
| 1745342943        | 2010        | 2010        | Love Ranch                          | Love Ranch                          | Hackford, Taylor                 | Taylor Hackford         | tt1125929        |
| 1746565062        | 1952        | 1952        | Assignment--Paris                   | Assignment: Paris                   | Parrish, Robert                  | Robert Parrish          | tt0044379        |
| 1746509441        | 1924        | 1924        | Triumph                             | Triumph                             | De Mille, Cecil B.               | Cecil B. DeMille        | tt0015433        |
| 1746484771        | 1919        | 1918        | Little Women                        | Little Women                        | Knoles, Harley                   | Harley Knoles           | tt0009309        |
| 1746512163        | 1927        | 1926        | God Gave Me Twenty Cents            | God Gave Me Twenty Cents            | Brenon, Herbert                  | Herbert Brenon          | tt0016926        |
| 1746577010        | 1962        | 1962        | The Notorious Landlady              | The Notorious Landlady              | Quine, Richard                   | Richard Quine           | tt0056289        |
| 1746578787        | 1958        | 1958        | Stakeout on Dope Street             | Stakeout on Dope Street             | Kershner, Irvin                  | Irvin Kershner          | tt0052242        |
| 1746512878        | 1910        | 1910        | The Mistake                         | The Mistake                         |                                  | Harry Solter            | tt0200870        |
| 1746581172        | 1960        | 1960        | Man on a String                     | Man on a String                     | DeToth, Andre                    | André De Toth           | tt0054058        |
| 1746392963        | 1985        | 1985        | The Jewel of the Nile               | The Jewel of the Nile               | Teague, Lewis                    | Lewis Teague            | tt0089370        |
| 1746421066        | 1982        | 1982        | Poltergeist                         | Poltergeist                         | Hooper, Tobe                     | Tobe Hooper             | tt0084516        |
| 1745359978        | 2002        | 2002        | Hansel & Gretel                     | Hansel & Gretel                     | Tunncliffe, Gary J.              | Gary J. Tunncliffe      | tt0293832        |
| 1746258895        | 1976        | 1976        | Gus                                 | Gus                                 | McEveety, Vincent                | Vincent McEveety        | tt0074599        |
| 1746434891        | 1999        | 1999        | Cookie's Fortune                    | Cookie's Fortune                    | Altman, Robert                   | Robert Altman           | tt0126250        |
| 1746584624        | 1930        | 1930        | The Lone Rider                      | The Lone Rider                      | King, Louis                      | Louis King              | tt0021084        |
| 1745341471        | 2002        | 2002        | Blood Work                          | Blood Work                          | Eastwood, Clint                  | Clint Eastwood          | tt0309377        |
| 1746578635        | 1960        | 1960        | Surfin' Shorts                      | Surfin' Shorts                      |                                  | Bruce Brown             | tt0298172        |
| 1746582079        | 1950        | 1950        | Second Chance                       | Second Chance                       | Beaudine, William                | William Beaudine        | tt0306057        |
| 1746433733        | 1998        | 1998        | Very Bad Things                     | Very Bad Things                     | Berg, Peter                      | Peter Berg              | tt0124198        |
| 1746492436        | 1947        | 1947        | Spoilers of the North               | Spoilers of the North               | Sale, Richard                    | Richard Sale            | tt0039859        |
| 1746569927        | 1958        | 1958        | Legion of the Doomed                | Legion of the Doomed                | Brooks, Thor                     | Thor L. Brooks          | tt0051853        |
| 1746585097        | 1929        | 1929        | Hearts in Dixie                     | Hearts in Dixie                     | Sloane, Paul                     | Paul Sloane             | tt0019971        |
| 1745293339        | 2005        | 2005        | The Pacifier                        | The Pacifier                        | Shankman, Adam                   | Adam Shankman           | tt0395699        |
| 1746524330        | 1916        | 1916        | War Brides                          | War Brides                          | Brenon, Herbert                  | Herbert Brenon          | tt0007539        |
| 1745309164        | 2005        | 2005        | First Descent                       | First Descent                       | Curley, Kemp ; Harrison, Kevin   | Kemp Curly              | tt0455475        |
| 1746500491        | 1924        | 1924        | Daddies                             | Daddies                             | Seiter, William A.               | William A. Seiter       | tt0014817        |
| 1746235039        | 1974        | 1974        | The Little Prince                   | The Little Prince                   | Donen, Stanley                   | Stanley Donen           | tt0071762        |
| 1746501884        | 1916        | 1916        | The Children in the House           | The Children in the House           | Franklin, C. M.; Franklin, S. A. | Chester M. Franklin     | tt0006509        |
| 1746218888        | 1977        | 1977        | Grand Theft Auto                    | Grand Theft Auto                    | Howard, Ron                      | Ron Howard              | tt0076100        |
| 1746423483        | 1998        | 1998        | Urban Legend                        | Urban Legend                        | Blanks, Jamie                    | Jamie Blanks            | tt0146336        |
| 1746453606        | 1943        | 1943        | Salute to the Marines               | Salute to the Marines               | Simon, S. Sylvan                 | S. Sylvan Simon         | tt0036328        |
| 1746421986        | 1999        | 1999        | The Insider                         | The Insider                         | Mann, Michael                    | Michael Mann            | tt0140352        |
| 1746408658        | 1981        | 1981        | Fantasies                           | Fantasies                           | Derek, John                      | John Derek              | tt0082363        |
| 1746585005        | 1940        | 1940        | Turnabout                           | Turnabout                           | Roach, Hal                       | Hal Roach               | tt0033190        |
| 1746497949        | 1919        | 1919        | Dawn                                | Dawn                                | Blackton, J. Stuart              | J. Stuart Blackton      | tt0010054        |

|            |      |      |                                 |                                 |                         |                         |           |
|------------|------|------|---------------------------------|---------------------------------|-------------------------|-------------------------|-----------|
| 1769970403 | 1966 | 1966 | The Devil's Mate                | The Devil's Mate                | Zorfa, T. G.            | T. G. Zorfa             | tt0216698 |
| 1769970730 | 1912 | 1912 | The Secret of the Miser's Cave  | The Secret of the Miser's Cave  |                         | George Melford          | tt0314631 |
| 1746532613 | 1915 | 1915 | Wildfire                        | Wildfire                        | Middleton, Edwin        | Edwin Middleton         | tt0006291 |
| 1746520579 | 1949 | 1949 | The Story of Seabiscuit         | The Story of Seabiscuit         | Butler, David           | David Butler            | tt0041923 |
| 1746554998 | 1963 | 1963 | Twice Told Tales                | Twice Told Tales                | Salkow, Sidney          | Sidney Salkow           | tt0057608 |
| 1746408666 | 1989 | 1989 | The Phantom of the Opera        | The Phantom of the Opera        | Little, Dwight H.       | Dwight H. Little        | tt0098090 |
| 1746251501 | 1976 | 1976 | God Told Me To                  | God Told Me To                  | Cohen, Larry            | Larry Cohen             | tt0075930 |
| 1746513857 | 1923 | 1923 | Strangers of the Night          | Strangers of the Night          | Niblo, Fred             | Fred Niblo              | tt0014515 |
| 1746530799 | 1950 | 1950 | Gunmen of Abilene               | Gunmen of Abilene               | Brannon, Fred C.        | Fred C. Brannon         | tt0128243 |
| 1746183398 | 1910 | 1910 | Arms and the Woman              | Arms and the Woman              |                         | Bannister Merwin        | tt0001119 |
| 1746473756 | 1945 | 1945 | Midnight Manhunt                | Midnight Manhunt                | Thomas, William C.      | William C. Thomas       | tt0037960 |
| 1746475991 | 1948 | 1948 | He Walked by Night              | He Walked by Night              | Werker, Alfred          | Alfred L. Werker        | tt0040427 |
| 1745374324 | 2004 | 2004 | National Treasure               | National Treasure               | Turteltaub, Jon         | Jon Turteltaub          | tt0368891 |
| 1746579047 | 1963 | 1963 | We Shall Return                 | We Shall Return                 | Goodman, Philip S.      | Philip S. Goodman       | tt0057673 |
| 1746436540 | 1942 | 1942 | Pardon My Gun                   | Pardon My Gun                   | Berke, William          | William Berke           | tt0036250 |
| 1746554877 | 1955 | 1955 | Bedevilled                      | Bedevilled                      | Leisen, Mitchell        | Mitchell Leisen         | tt0047865 |
| 1746409097 | 1992 | 1992 | Noises Off...                   | Noises Off...                   | Bogdanovich, Peter      | Peter Bogdanovich       | tt0105017 |
| 1746571363 | 1952 | 1952 | Glory Alley                     | Glory Alley                     | Walsh, Raoul            | Raoul Walsh             | tt0044665 |
| 1746583555 | 1951 | 1951 | Yukon Manhunt                   | Yukon Manhunt                   | McDonald, Frank         | Frank McDonald          | tt0186722 |
| 1745374511 | 2002 | 2002 | Stolen Summer                   | Stolen Summer                   | Jones, Pete             | Pete Jones              | tt0286162 |
| 1746492398 | 1945 | 1945 | Code of the Lawless             | Code of the Lawless             | Fox, Wallace W.         | Wallace Fox             | tt0168595 |
| 1746577330 | 1959 | 1959 | Paratroop Command               | Paratroop Command               | Witney, William         | William Witney          | tt0053156 |
| 1746520653 | 1925 | 1925 | Excuse Me                       | Excuse Me                       | Goulding, Alf           | Alfred J. Goulding      | tt0015789 |
| 1746525079 | 1920 | 1920 | The Sport of Kings              | The Sport of Kings              | Thomson, Frederick A.   | Frederick A. Thomson    | tt0197912 |
| 1746566905 | 1952 | 1952 | The Jungle                      | The Jungle                      | Berke, William          | William Berke           | tt0044778 |
| 1746500014 | 1924 | 1924 | Stop at Nothing                 | Stop at Nothing                 | Seeling, Charles R.     | Charles R. Seeling      | tt0166824 |
| 1746583818 | 1930 | 1930 | Anna Christie                   | Anna Christie                   | Brown, Clarence         | Clarence Brown          | tt0020641 |
| 1746500282 | 1923 | 1923 | The Gold Diggers                | The Gold Diggers                | Beaumont, Harry         | Harry Beaumont          | tt0014090 |
| 1746582206 | 1930 | 1930 | The Truth About Youth           | The Truth About Youth           | Seiter, William         | William A. Seiter       | tt0021493 |
| 1746584124 | 1939 | 1939 | The Three Musketeers            | The Three Musketeers            | Dwan, Allan             | Allan Dwan              | tt0032028 |
| 1746520967 | 1949 | 1949 | Adam's Rib                      | Adam's Rib                      | Cukor, George           | George Cukor            | tt0041090 |
| 1746216972 | 1966 | 1966 | Night Train to Mundo Fine       | Night Train to Mundo Fine       | Francis, Coleman        | Coleman Francis         | tt0060753 |
| 1746569765 | 1957 | 1957 | Zero Hour!                      | Zero Hour!                      | Bartlett, Hall          | Hall Bartlett           | tt0051221 |
| 1746465316 | 1942 | 1941 | Johnny Eager                    | Johnny Eager                    | LeRoy, Mervyn           | Mervyn LeRoy            | tt0033774 |
| 1746582136 | 1928 | 1928 | The Adventurer                  | The Adventurer                  | Tourjansky, Viachetslav | Viktor Tourjansky       | tt0018624 |
| 1746410207 | 1990 | 1990 | Air America                     | Air America                     | Spottiswoode, Roger     | Roger Spottiswoode      | tt0099005 |
| 1746509300 | 1949 | 1948 | Adventures of Don Juan          | Adventures of Don Juan          | Sherman, Vincent        | Vincent Sherman         | tt0040076 |
| 1746183133 | 1910 | 1910 | The Call of the Circus          | The Call of the Circus          |                         | Harry Solter            | tt0200512 |
| 1745293606 | 2007 | 2007 | The Hitcher                     | The Hitcher                     | Meyers, Dave            | Dave Meyers             | tt0455960 |
| 1746577949 | 1935 | 1935 | Night Life of the Gods          | Night Life of the Gods          | Sherman, Lowell         | Lowell Sherman          | tt0026776 |
| 1746577045 | 1961 | 1961 | Bloodlust                       | Bloodlust!                      | Brooke, Ralph           | Ralph Brooke            | tt0054691 |
| 1746581483 | 1928 | 1928 | White Shadows in the South Seas | White Shadows in the South Seas | Van Dyke, W. S.         | W. S. Van Dyke          | tt0019574 |
| 1746503948 | 1921 | 1921 | The Blasphemer                  | The Blasphemer                  | Goebel, O. E.           | O. E. Goebel            | tt0221024 |
| 1746508973 | 1925 | 1925 | Sally                           | Sally                           | Green, Alfred E.        | Alfred E. Green         | tt0016307 |
| 1746508932 | 1925 | 1925 | Triple Action                   | Triple Action                   | Gibson, Tom             | Tom Gibson              | tt0016455 |
| 1746520774 | 1949 | 1949 | Rusty Saves a Life              | Rusty Saves a Life              | Friedman, Seymour       | Seymour Friedman        | tt0041833 |
| 1745309116 | 2005 | 2004 | Palindromes                     | Palindromes                     | Solondz, Todd           | Todd Solondz            | tt0362004 |
| 1746234290 | 1968 | 1968 | They Ran for Their Lives        | They Ran for Their Lives        | Payne, John             | John Payne              | tt0063685 |
| 1746219541 | 1972 | 1972 | The Broad Coalition             | The Broad Coalition             | Nuchtern, Simon         | Simon Nuchtern          | tt0212001 |
| 1746582315 | 1930 | 1930 | All Quiet on the Western Front  | All Quiet on the Western Front  | Milestone, Lewis        | Lewis Milestone         | tt0020629 |
| 1746201673 | 1970 | 1970 | Lost Flight                     | Lost Flight                     | Horn, Leonard           | Leonard Horn            | tt0064601 |
| 1745374396 | 2001 | 2001 | 'N Sync: Bigger Than Live       | 'N Sync: Bigger Than Live       | Bailey, John            | John Bailey             | tt0257953 |
| 1746419377 | 1986 | 1985 | Radioactive Dreams              | Radioactive Dreams              | Pyun, Albert F.         | Albert Pyun             | tt0091818 |
| 1745302706 | 2005 | 2004 | King of the Corner              | King of the Corner              | Riegert, Peter          | Peter Riegert           | tt0363913 |
| 1746393205 | 1984 | 1984 | Chords of Fame                  | Chords of Fame                  | Korolenko, Michael      | Michael David Korolenko | tt0162246 |
| 1746420542 | 1982 | 1982 | Mother Lode                     | Mother Lode                     | Heston, Charlton        | Charlton Heston         | tt0084359 |
| 1746257760 | 1975 | 1975 | Apache Blood                    | Apache Blood                    | Quillen, Tom            | Vern Piehl              | tt0072651 |



|            |      |      |                                                  |                                               |                                   |                      |           |
|------------|------|------|--------------------------------------------------|-----------------------------------------------|-----------------------------------|----------------------|-----------|
| 1745303131 | 2006 | 2006 | The Big Buy: Tom Delay's Stolen Congress         | The Big Buy: Tom DeLay's Stolen Congress      | Birnbaum, Mark ; Schermbeck, Jim  | Mark Birnbaum        | tt0775432 |
| 1769971086 | 1970 | 1970 | Dandy                                            | Dandy                                         | Wilson, R. Charleton              | R. Charleton Wilson  | tt0195626 |
| 1746455532 | 1995 | 1995 | She Lives to Ride                                | She Lives to Ride                             | Stone, Alice                      | Alice Stone          | tt0111163 |
| 1745341196 | 2002 | 2002 | Melissa Etheridge Live... And Alone              | Melissa Etheridge: Live... and Alone          | Simon, Michael                    | Michael Simon        | tt0349809 |
| 1746410822 | 1987 | 1987 | Nightflyers                                      | Nightflyers                                   | Blake, T. C.                      | Robert Collector     | tt0093626 |
| 1746210257 | 1971 | 1971 | Blood and Lace                                   | Blood and Lace                                | Gilbert, Philip                   | Philip S. Gilbert    | tt0066848 |
| 1746434583 | 1995 | 1994 | Postcards from America                           | Postcards from America                        | McLean, Steve                     | Steve McLean         | tt0110876 |
| 1745302550 | 2005 | 2005 | The World's Fastest Indian                       | The World's Fastest Indian                    | Donaldson, Roger                  | Roger Donaldson      | tt0412080 |
| 1746419964 | 1991 | 1991 | Child's Play 3                                   | Child's Play 3                                | Bender, Jack                      | Jack Bender          | tt0103956 |
| 1745359665 | 2008 | 2008 | Blessed Is the Match: The Life and Death of Hann | Blessed Is the Match: The Life and Death of F | Grossman, Roberta                 | Roberta Grossman     | tt0814031 |
| 1745309218 | 2006 | 2006 | Fur: An Imaginary Portrait of Diane Arbus        | Fur: An Imaginary Portrait of Diane Arbus     | Shainberg, Steven                 | Steven Shainberg     | tt0422295 |
| 1746422250 | 1993 | 1993 | A Home of Our Own                                | A Home of Our Own                             | Bill, Tony                        | Tony Bill            | tt0107130 |
| 1745359777 | 2009 | 2009 | Yoo-Hoo, Mrs. Goldberg                           | Yoo Hoo, Mrs. Goldberg                        | Kempner, Aviva                    | Aviva Kempner        | tt1334479 |
| 1745375177 | 2009 | 2009 | Pandorum                                         | Pandorum                                      | Alvart, Christian                 | Christian Alvart     | tt1188729 |
| 1746410181 | 1981 | 1981 | Tarzan, The Ape Man                              | Tarzan the Ape Man                            | Derek, John                       | John Derek           | tt0083170 |
| 1745374762 | 2010 | 2010 | Raven                                            | The Raven                                     | Martin, Gregori J.                | Ryan Cultrera        | tt2101477 |
| 1746434875 | 1994 | 1994 | Fresh Kill                                       | Fresh Kill                                    | Cheang, Shu Lea                   | Shu Lea Cheang       | tt0109843 |
| 1746420897 | 1997 | 1997 | Mrs. Brown                                       | Mrs Brown                                     | Madden, John                      | John Madden          | tt0119280 |
| 1746455947 | 1995 | 1995 | Reckless                                         | Reckless                                      | René, Norman                      | Norman René          | tt0114241 |
| 1745393705 | 2008 | 2008 | Henry Poole Is Here                              | Henry Poole Is Here                           | Pellington, Mark                  | Mark Pellington      | tt1029120 |
| 1745342283 | 2002 | 2002 | Outta Time                                       | Outta Time                                    | David, Lorena                     | Lorena David         | tt0279750 |
| 1746198221 | 1970 | 1970 | Torture Dungeon                                  | Torture Dungeon                               | Milligan, Andy                    | Andy Milligan        | tt0066475 |
| 1746435848 | 1996 | 1996 | One Way Out                                      | One Way Out                                   | Lynn, Kevin                       | Kevin Lynn           | tt0117251 |
| 1746394236 | 1985 | 1985 | In Her Own Time                                  | In Her Own Time                               | Littman, Lynne                    | Lynne Littman        | tt0158672 |
| 1745272225 | 2000 | 2000 | Trade Off                                        | Trade Off                                     | Mercer, Shaya                     | Shaya Mercer         | tt0250779 |
| 1746393051 | 1986 | 1986 | Avenging Force                                   | Avenging Force                                | Firstenberg, Sam                  | Sam Firstenberg      | tt0090678 |
| 1746453685 | 1998 | 1998 | Laughing Dead                                    | Laughing Dead                                 | Gleason, Patrick                  | Patrick Gleason      | tt0212303 |
| 1746235719 | 1973 | 1973 | Dangerous Relations                              | Dangerous Relations                           |                                   | J. Ford Bell         | tt0310974 |
| 1746393470 | 1987 | 1987 | The Gate                                         | The Gate                                      | Takacs, Tibor                     | Tibor Takács         | tt0093075 |
| 1745357725 | 2008 | 2008 | The Grand                                        | The Grind                                     | Penn, Zak                         | Josh Davis           | tt1396472 |
| 1746436854 | 2000 | 2000 | I Dreamed of Africa                              | I Dreamed of Africa                           | Hudson, Hugh                      | Hugh Hudson          | tt0167203 |
| 1746567607 | 1932 | 1932 | Devil of the Matterhorn                          | Devil of the Matterhorn                       | Revier, Harry J.                  | Harry Revier         | tt8209236 |
| 1746270201 | 1980 | 1980 | Why Would I Lie                                  | Why Would I Lie?                              | Peerce, Larry                     | Larry Peerce         | tt0081753 |
| 1745342449 | 2001 | 2001 | Lush                                             | Flush                                         | Gibson, Mark                      | David Walker Johnson | tt0297894 |
| 1746433536 | 1994 | 1993 | Gunmen                                           | Gunmen                                        | Sarafian, Deran                   | Deran Sarafian       | tt0109959 |
| 1745374776 | 2008 | 2008 | The Boy in the Striped Pajamas                   | The Boy in the Striped Pajamas                | Herman, Mark                      | Mark Herman          | tt0914798 |
| 1746409047 | 1985 | 1985 | Cavegirl                                         | Cavegirl                                      | Oliver, David                     | David Oliver         | tt0088891 |
| 1745374403 | 2008 | 2007 | Anita O'Day: The Life of a Jazz Singer           | Anita O'Day: The Life of a Jazz Singer        | Cavolina, Robbie ; McCrudden, Ian | Robbie Cavolina      | tt0843838 |
| 1745309286 | 2006 | 2005 | Lonesome Jim                                     | Lonesome Jim                                  | Buscemi, Steve                    | Steve Buscemi        | tt0385056 |
| 1746409100 | 1983 | 1983 | High Road to China                               | High Road to China                            | Hutton, Brian G.                  | Brian G. Hutton      | tt0085678 |
| 1745271888 | 2001 | 2001 | Captain Corelli's Mandolin                       | Captain Corelli's Mandolin                    | Madden, John                      | John Madden          | tt0238112 |
| 1746409769 | 1987 | 1987 | Someone to Watch Over Me                         | Someone to Watch Over Me                      | Scott, Ridley                     | Ridley Scott         | tt0094008 |
| 1745272108 | 2000 | 2000 | The Love Machine                                 | The Love Machine                              | Eriksen, Gordon                   | Gordon Eriksen       | tt0249757 |
| 1745271669 | 2000 | 2000 | Hybrid                                           | Hybrid                                        | McCollum, Monteith                | Monteith McCollum    | tt0267563 |
| 1746437549 | 1998 | 1998 | Shattered Image                                  | Shattered Image                               | Ruiz, Raúl                        | Raoul Ruiz           | tt0143874 |
| 1745340274 | 2004 | 2004 | Seeing Other People                              | Seeing Other People                           | Wolodarsky, Wally                 | Wallace Wolodarsky   | tt0362129 |
| 1745302761 | 2005 | 2006 | Barely Legal                                     | Barely Legal                                  | Evans, David Mickey               | Ryan Witherspoon     | tt0853229 |
| 1746200132 | 1970 | 1970 | Love in the Pacific                              | Love in the Pacific                           | Sulistrowski, Zygmunt             | Zygmunt Sulistrowski | tt0250535 |
| 1745393817 | 2010 | 2009 | 2:22                                             | 2022                                          | Guzman, Phillip                   | Dru Williams         | tt7538914 |
| 1745395642 | 2008 | 2008 | Doubt                                            | Doubt                                         | Shanley, John Patrick             | Zachary Junt         | tt1351130 |
| 1746201841 | 1970 | 1969 | Law and Order                                    | Law and Order                                 | Wiseman, Frederick                | Frederick Wiseman    | tt0064577 |
| 1746410553 | 1986 | 1986 | Destination Nicaragua                            | Destination Nicaragua                         | Trent, Barbara; Kasper, David     | Barbara Trent        | tt0123797 |
| 1746235010 | 1978 | 1978 | International Velvet                             | International Velvet                          | Forbes, Bryan                     | Bryan Forbes         | tt0077743 |
| 1746409703 | 1991 | 1991 | Stepping Out                                     | Stepping Out                                  | Gilbert, Lewis                    | Lewis Gilbert        | tt0102979 |
| 1745374420 | 2001 | 2000 | Everything Put Together                          | Everything Put Together                       | Forster, Marc                     | Marc Forster         | tt0228277 |
| 1746394426 | 1989 | 1989 | Breaking In                                      | Breaking In                                   | Forsyth, Bill                     | Bill Forsyth         | tt0096976 |
| 1745293176 | 2007 | 2007 | Love in the Time of Cholera                      | Love in the Time of Cholera                   | Newell, Mike                      | Mike Newell          | tt0484740 |

|            |      |      |                                         |                                         |                     |                    |           |
|------------|------|------|-----------------------------------------|-----------------------------------------|---------------------|--------------------|-----------|
| 1745340290 | 2002 | 2001 | Divorce: The Musical                    | Divorce: The Musical                    | Dworman, Steven     | Steven Dworman     | tt0313974 |
| 1746409988 | 1990 | 1990 | Revenge                                 | Revenge                                 | Scott, Tony         | Tony Scott         | tt0100485 |
| 1746393407 | 1988 | 1988 | Spellbinder                             | Spellbinder                             | Greek, Janet        | Janet Greek        | tt0096152 |
| 1746235351 | 1973 | 1972 | Molly and Lawless John                  | Molly and Lawless John                  | Nelson, Gary        | Gary Nelson        | tt0068962 |
| 1746235367 | 1974 | 1974 | Amazing Grace                           | Amazing Grace                           | Lathan, Stan        | Stan Lathan        | tt0071130 |
| 1745375283 | 2010 | 2010 | Louis                                   | Louis                                   | Pritzker, Dan       | Dan Pritzker       | tt1093902 |
| 1746408841 | 1984 | 1984 | Stranger Than Paradise                  | Stranger Than Paradise                  | Jarmusch, Jim       | Jim Jarmusch       | tt0088184 |
| 1745342499 | 2008 | 2008 | City of Ember                           | City of Ember                           | Kenan, Gil          | Gil Kenan          | tt0970411 |
| 1745340097 | 2002 | 2002 | Standing by Yourself                    | Standing by Yourself                    | Koury, Josh         | Josh Koury         | tt0315634 |
| 1745302518 | 2005 | 2005 | The Last Campaign                       | The Last Campaign                       | Ewing, Wayne        | Wayne Ewing        | tt0481558 |
| 1746393099 | 1987 | 1987 | Stakeout                                | Stakeout                                | Badham, John        | John Badham        | tt0094025 |
| 1746504128 | 1919 | 1919 | The Coming of the Law                   | The Coming of the Law                   | Rosson, Arthur      | Arthur Rosson      | tt0010016 |
| 1746516471 | 1920 | 1920 | The Flapper                             | The Flapper                             | Crosland, Alan      | Alan Crosland      | tt0011193 |
| 1746436124 | 1943 | 1942 | Stand by for Action                     | Stand by for Action                     | Leonard, Robert Z.  | Robert Z. Leonard  | tt0036386 |
| 1746585434 | 1940 | 1940 | Meet the Missus                         | Meet the Missus                         | St. Clair, Mal      | Malcolm St. Clair  | tt0032773 |
| 1745342516 | 2001 | 2001 | All Access: Front Row. Backstage. Live! | All Access: Front Row. Backstage. Live! | Atkins, Martyn      | Martyn Atkins      | tt0238015 |
| 1746408444 | 1989 | 1988 | Meher Baba: Avatar of the Age           | Meher Baba: Avatar of the Age           | Luck, Irwin         | Irwin Luck         | tt0199762 |
| 1745341988 | 2008 | 2007 | Snow Angels                             | Snow Angels                             | Green, David Gordon | Trevor Dahlen      | tt1414072 |
| 1746210475 | 1973 | 1973 | A Name for Evil                         | A Name for Evil                         | Girard, Bernard     | Bernard Girard     | tt0070435 |
| 1746219202 | 1979 | 1979 | City on Fire                            | City on Fire                            | Rakoff, Alvin       | Alvin Rakoff       | tt0078976 |
| 1769974215 | 1970 | 1970 | Danish & Blue                           | Danish & Blue                           | Crilly, Spence      | Zoltan G. Spencer  | tt0123787 |
| 1745302350 | 2005 | 2005 | The Dying Gaul                          | The Dying Gaul                          | Lucas, Craig        | Brian Huckleba     | tt1725134 |
| 1746210551 | 1971 | 1971 | Star Spangled Girl                      | Star Spangled Girl                      | Paris, Jerry        | Jerry Paris        | tt0067787 |
| 1746423565 | 1999 | 1998 | Kelly Loves Tony                        | Kelly Loves Tony                        | Nakasako, Spencer   | Spencer Nakasako   | tt0144266 |
| 1746409051 | 1993 | 1993 | Boiling Point                           | Boiling Point                           | Harris, James B.    | Jason Lehel        | tt0382575 |
| 1746422282 | 1995 | 1995 | Fluke                                   | Fluke                                   | Carlei, Carlo       | Carlo Carlei       | tt0113089 |
| 1745342771 | 2008 | 2008 | Elegy                                   | Elegy                                   | Coixet, Isabel      | Heather Braaten    | tt1764290 |
| 1745302895 | 2006 | 2006 | American Blackout                       | American Blackout                       | Inaba, Ian          | Ian Inaba          | tt0492443 |
| 1746455245 | 1995 | 1994 | World and Time Enough                   | World and Time Enough                   | Mueller, Eric       | Eric Mueller       | tt0111747 |
| 1746440420 | 1997 | 1997 | The Rook                                | Room                                    | Palatnik, Eran      | Sebastian Hedgecoe | tt0497657 |
| 1745293547 | 2007 | 2007 | Captivity                               | Captivity                               | Joffé, Roland       | Roland Joffé       | tt0374563 |
| 1745341442 | 2001 | 2001 | Kingdom Come                            | Kingdom Come                            | McHenry, Doug       | Doug McHenry       | tt0246002 |
| 1745302316 | 2005 | 2005 | A Sidewalk Astronomer                   | A Sidewalk Astronomer                   | Jacobs, Jeffrey Fox | Jeffrey Jacobs     | tt0450369 |
| 1745309403 | 2007 | 2006 | The Amateurs                            | Amateur                                 | Traeger, Michael    | Nicholas Roselius  | tt1774284 |
